# Supplementary material for: Multiomic screening of invasive GBM cells reveals targetable transsulfuration pathway alterations
Source: PubMed Central journal article supplement (PMC10849762; doi:10.1172/jci170397), 2024-02-01

GAPDH 1° 1:50K CTH validation for Joe  
2° Ab anti-rabbit 1:2000 for 3h

5/4/22

ACZ

KD line 2 KD line 2 KD line 2  
sample 1 sample 2 sample 3

Control Control Control  
1 2 3

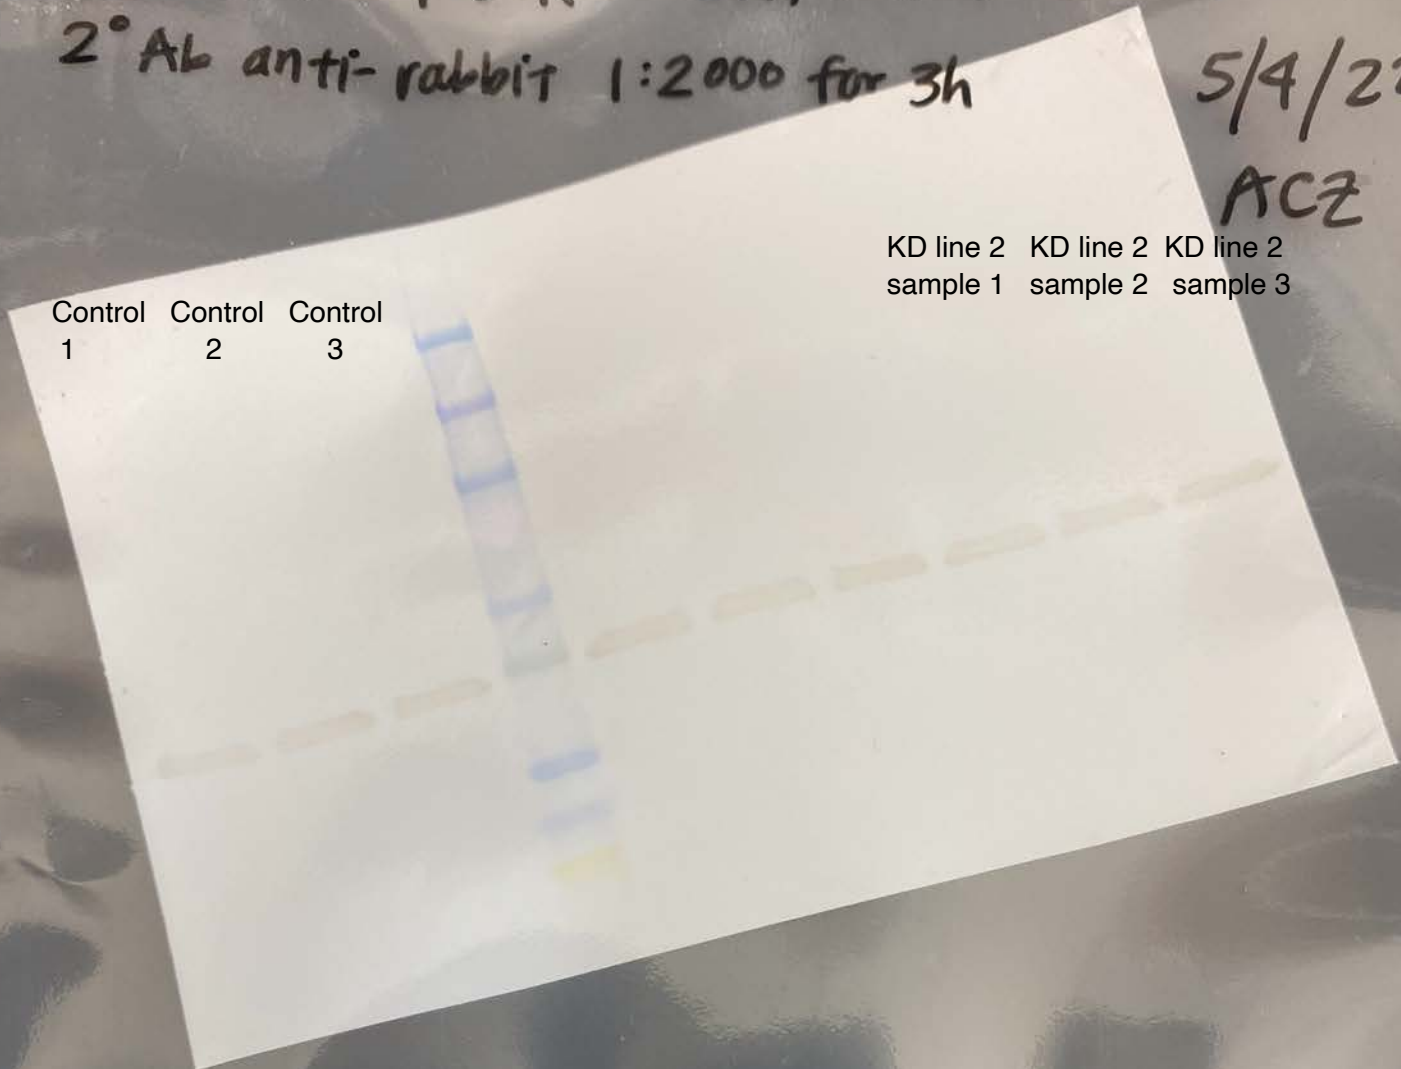

CTH validation

CTH blot

1° 1:1000

2°

Control Control Control  
Sample 1 Sample 2 Sample 3

KD line 1 KD line 1 KD line 1  
sample 1 sample 2 sample 3

KD line 2 KD line 2 KD line 2  
sample 1 sample 2 sample 3

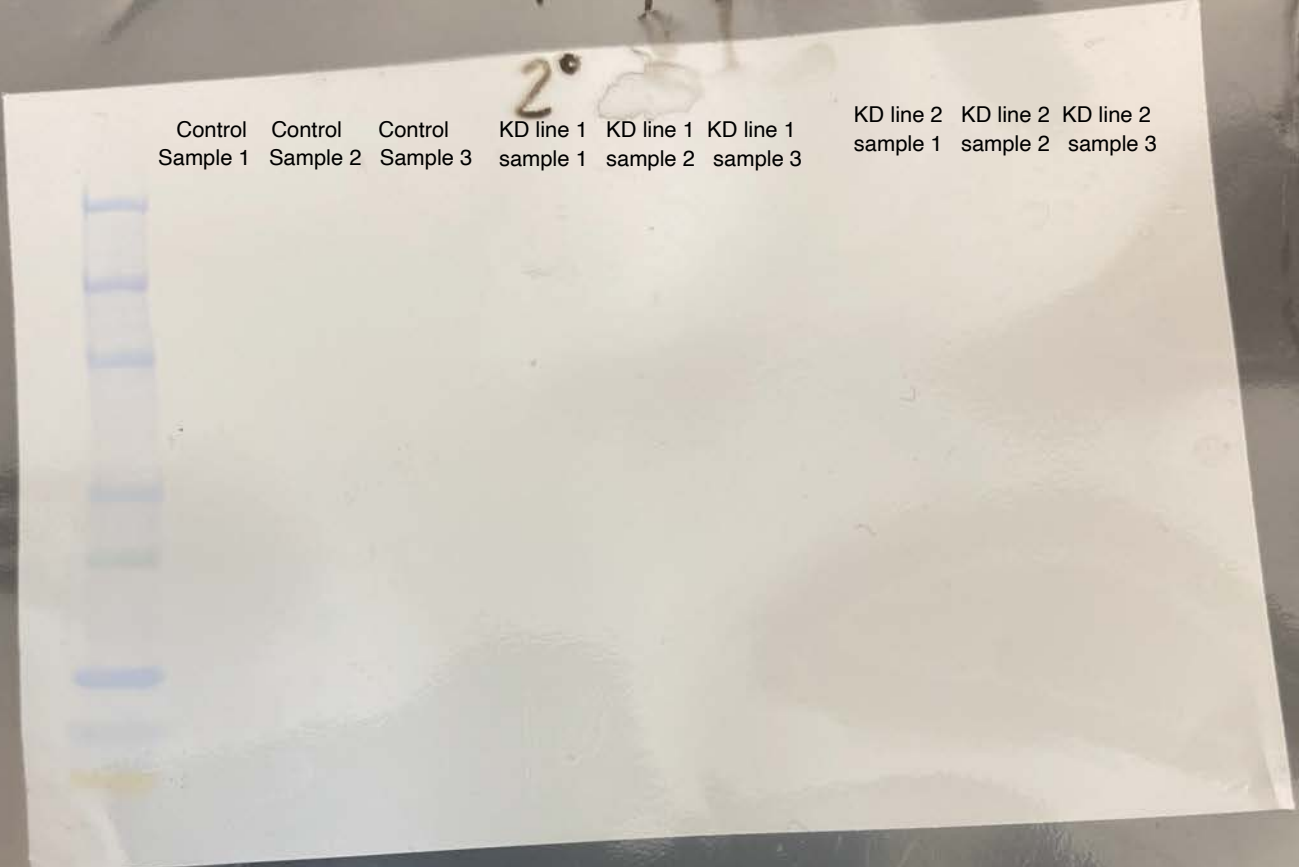

anti-rabbit

2° 1:2000 for 3h

5/6/22 ACZ

Control Sample 1    Control Sample 2    Control Sample 3    KD Line 1 Sample 1    KD Line 1 Sample 2    KD Line 1 Sample 3    KD Line 2 Sample 1    KD Line 2 Sample 2    KD Line 2 Sample 3

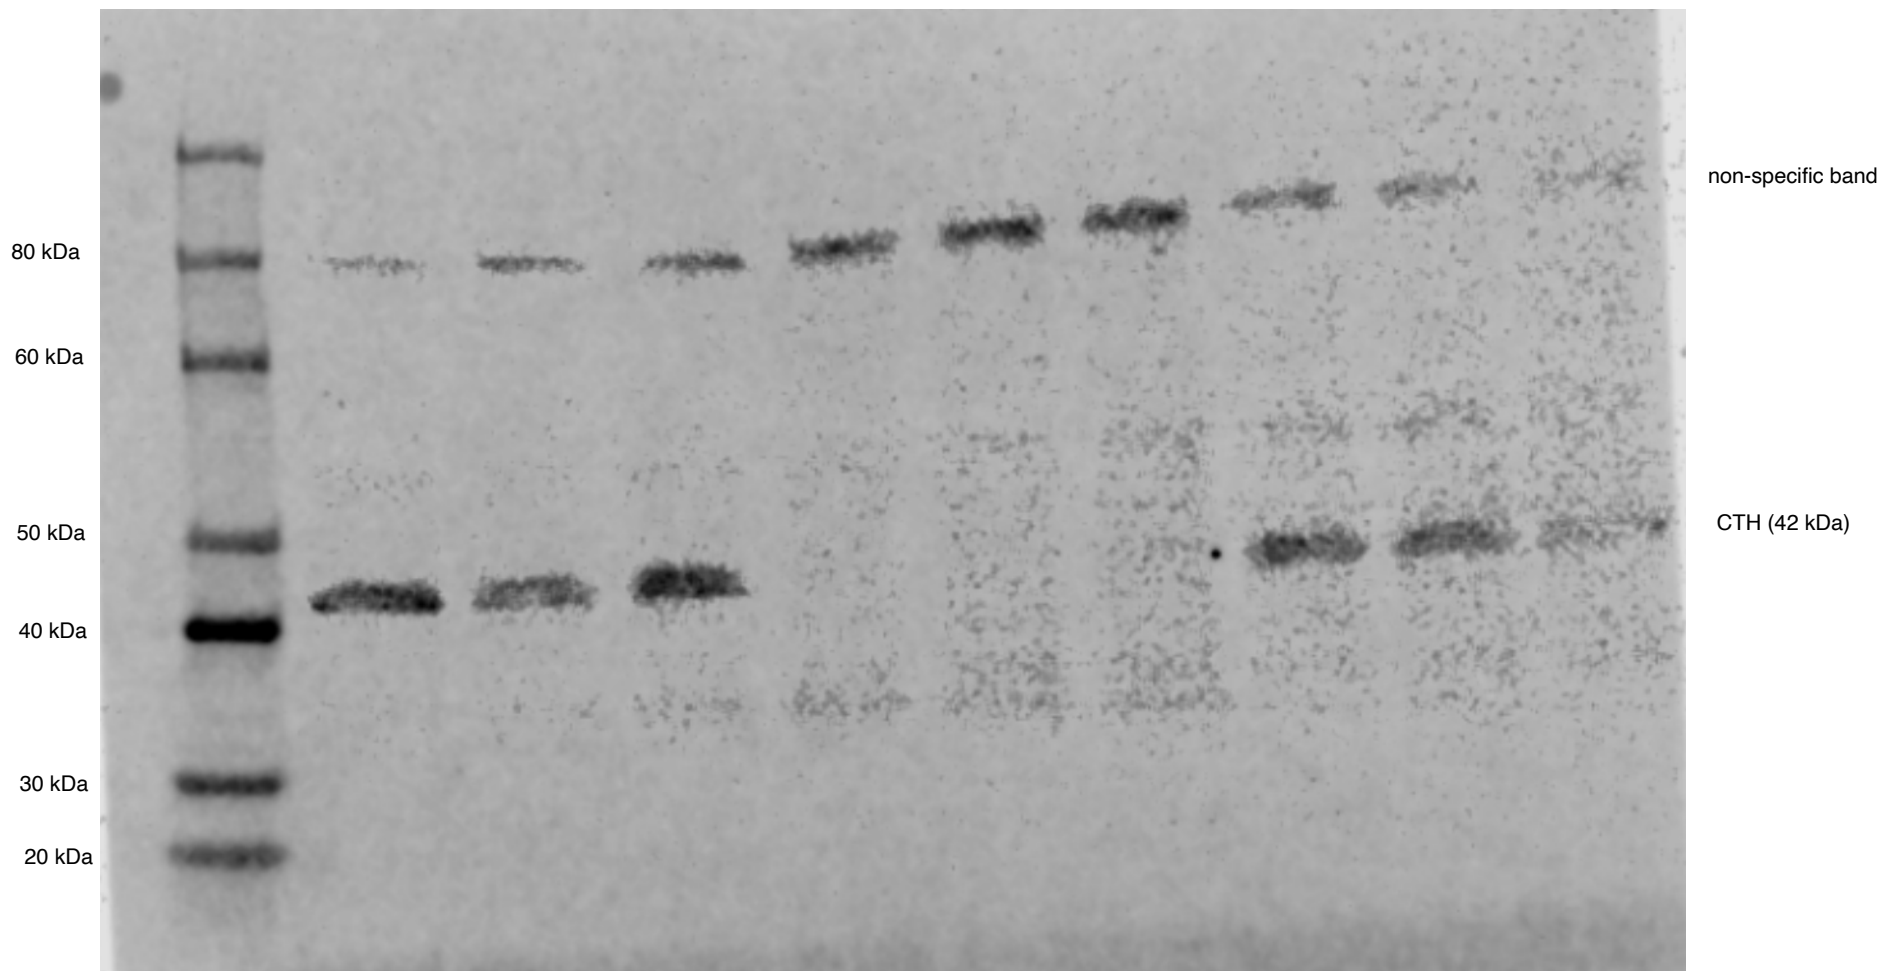

Supplement: jci-134-170397-s070.pdf [file jci-134-170397-s070.pdf]
