# Supplementary material for: Multiomic screening of invasive GBM cells reveals targetable transsulfuration pathway alterations
Source: PubMed Central journal article supplement (PMC10849762; doi:10.1172/jci170397), 2024-02-01
Supplement: jci-134-170397-s075.pdf [file jci-134-170397-s075.pdf]

Supplemental Table 11. Bulk RNA-seq results of edge vs. core fractions in GBM43 CTH knockdown cells invading 3D hydrogels.

| gene_id                | CTHKD_INV1                                         | CTHKD_INV2       | CTHKD_INV3  | CTHKD_CORE1 |          |
|------------------------|----------------------------------------------------|------------------|-------------|-------------|----------|
|                        | CTHKD_CORE2                                        | CTHKD_CORE3      | CTH_KD_Inv  | CTH_KD_Core |          |
|                        | log2FoldChange                                     | pvalue           | padj        | gene_name   | gene_chr |
|                        | gene_start                                         | gene_end         | gene_strand | gene_length |          |
|                        | gene_biotype                                       | gene_description | tf_family   |             |          |
| CTHKD_INV1_count       | CTHKD_INV2_count                                   | CTHKD_INV3_count |             |             |          |
| CTHKD_CORE1_count      | CTHKD_CORE2_count                                  |                  |             |             |          |
| CTHKD_CORE3_count      | CTHKD_INV1_fpkm                                    | CTHKD_INV2_fpkm  |             |             |          |
| CTHKD_INV3_fpkm        | CTHKD_CORE1_fpkm                                   | CTHKD_CORE2_fpkm |             |             |          |
| CTHKD_CORE3_fpkm       |                                                    |                  |             |             |          |
| ENSG00000131747        | 10741.2322                                         | 9550.377604      | 14883.06969 |             |          |
| 2203.040041            | 2268.200216                                        | 2206.753703      | 11724.89316 |             |          |
| 2225.997987            | 2.397045276                                        | 1.03E-50         | 1.58E-46    |             | TOP2A    |
| 17                     | 40388516                                           | 40417950         | -           | 6437        |          |
| protein_coding         | DNA topoisomerase II alpha [Source:HGNC            |                  |             |             |          |
| Symbol;Acc:HGNC:11989] | -                                                  | 9284             | 10303       | 15221       | 2193     |
| 2249                   | 78.87626463                                        | 70.56903012      | 109.5373254 |             | 2482     |
| 16.47237949            | 16.80261459                                        | 16.30992568      |             |             |          |
| ENSG0000011426         | 9040.498534                                        | 7242.269263      | 9847.407849 |             |          |
| 1905.684887            | 2172.244929                                        | 2040.92828       | 8710.058549 |             |          |
| 2039.619365            | 2.094231832                                        | 3.77E-48         | 2.88E-44    |             | ANLN     |
| 7                      | 36389806                                           | 36453791         | +           | 6012        |          |
| protein_coding         | anillin actin binding protein [Source:HGNC         |                  |             |             |          |
| Symbol;Acc:HGNC:14082] | -                                                  | 7814             | 7813        | 10071       | 1897     |
| 2080                   | 71.08028291                                        | 57.29712229      | 77.598992   |             | 2377     |
| 15.25631248            | 17.22934659                                        | 16.15066462      |             |             |          |
| ENSG00000072571        | 1162.746484                                        | 1087.313688      | 1631.945557 |             |          |
| 178.8149235            | 168.1502174                                        | 215.8674143      | 1294.00191  |             |          |
| 187.6108517            | 2.786596573                                        | 4.47E-40         | 2.28E-36    |             | HMMR     |
| 5                      | 163460203                                          | 163491945        | +           | 3936        |          |
| protein_coding         | hyaluronan mediated motility receptor [Source:HGNC |                  |             |             |          |
| Symbol;Acc:HGNC:5012]  | -                                                  | 1005             | 1173        | 1669        | 178      |
| 220                    | 13.96386639                                        | 13.13944073      | 19.64281393 |             | 184      |
| 2.186583814            | 2.037142132                                        | 2.609237592      |             |             |          |
| ENSG00000170312        | 2010.799392                                        | 1859.463989      | 2359.427578 |             |          |
| 514.3440497            | 462.413098                                         | 548.4994754      | 2076.563653 |             |          |
| 508.4188743            | 2.030422938                                        | 2.70E-36         | 1.03E-32    |             | CDK1     |
| 10                     | 60778331                                           | 60794852         | +           | 3931        |          |
| protein_coding         | cyclin dependent kinase 1 [Source:HGNC             |                  |             |             |          |
| Symbol;Acc:HGNC:1722]  | -                                                  | 1738             | 2006        | 2413        | 512      |
| 559                    | 24.17917291                                        | 22.49892888      | 28.43522925 |             | 506      |
| 6.297499383            | 5.609266457                                        | 6.638268277      |             |             |          |
| ENSG00000143228        | 1648.670388                                        | 1440.482073      | 1948.752243 |             |          |
| 303.3826231            | 381.0795689                                        | 258.0596816      | 1679.301568 |             |          |

|                 |                                                                                 |             |                    |        |
|-----------------|---------------------------------------------------------------------------------|-------------|--------------------|--------|
| 314.1739579     | 2.417354048                                                                     | 6.11E-36    | 1.87E-32           | NUF2   |
| 1               | 163266576                                                                       | 163355764   | + 3362             |        |
| protein_coding  | "NUF2, NDC80 kinetochore complex component [Source:HGNC Symbol;Acc:HGNC:14621]" |             |                    |        |
| 302             | 417                                                                             | 263         | - 1425 1554        | 1993   |
| 27.46072793     | 4.343206217                                                                     | 5.405015499 | 20.37920619        |        |
| ENSG00000066279 | 3180.487647                                                                     | 2451.785768 | 4983.838527        |        |
| 582.6553688     | 498.9674931                                                                     | 358.1436646 | 3538.70398         |        |
| 479.9221755     | 2.882415714                                                                     | 1.52E-35    | 3.87E-32           | ASPM   |
| 1               | 197084128                                                                       | 197146694   | - 10887            |        |
| protein_coding  | abnormal spindle microtubule assembly [Source:HGNC Symbol;Acc:HGNC:19048]       |             |                    |        |
| 365             | 13.80896821                                                                     | 10.71152761 | 2749 2645 5097 580 | 546    |
| 2.57585248      | 2.185460782                                                                     | 1.565058867 | 21.68746876        |        |
| ENSG00000112984 | 1314.308464                                                                     | 1322.759278 | 1757.103754        |        |
| 274.2498546     | 246.7421669                                                                     | 285.5337162 | 1609.437997        |        |
| 268.8419126     | 2.582256429                                                                     | 4.53E-33    | 9.19E-30           | KIF20A |
| 5               | 138178719                                                                       | 138187715   | + 3958             |        |
| protein_coding  | kinesin family member 20A [Source:HGNC Symbol;Acc:HGNC:9787]                    |             |                    |        |
| 291             | 15.69629868                                                                     | 15.8957909  | 2241 273           | 270    |
| 3.334940375     | 2.972669122                                                                     | 3.432126092 | 26.22820216        |        |
| ENSG00000126787 | 1228.6933                                                                       | 1117.903076 | 1757.103754        |        |
| 222.0117871     | 248.5698867                                                                     | 266.8906213 | 1367.900043        |        |
| 245.8240983     | 2.47618958                                                                      | 4.81E-33    | 9.19E-30           | DLGAP5 |
| 14              | 55148112                                                                        | 55191678    | - 3667             |        |
| protein_coding  | DLG associated protein 5 [Source:HGNC Symbol;Acc:HGNC:16864]                    |             |                    |        |
| 272             | 15.83829105                                                                     | 14.50007858 | 1797 221           | 272    |
| 2.913953252     | 3.232336689                                                                     | 3.462613596 | 22.70071953        |        |
| ENSG00000164104 | 3198.999033                                                                     | 4128.640381 | 5450.248372        |        |
| 1027.683521     | 964.1221707                                                                     | 1029.29508  | 4259.295929        |        |
| 1007.033591     | 2.080784239                                                                     | 3.45E-31    | 5.86E-28           | HMGB2  |
| 4               | 173331695                                                                       | 173335125   | - 2775             |        |
| protein_coding  | high mobility group box 2 [Source:HGNC Symbol;Acc:HGNC:5000]                    |             |                    |        |
| 1049            | 54.49126135                                                                     | 70.76543542 | 5574 1023          | 1055   |
| 17.82435662     | 16.56716013                                                                     | 17.64649822 | 93.04786931        |        |
| ENSG00000118193 | 1168.531292                                                                     | 1080.82503  | 1486.253593        |        |
| 301.3734666     | 242.1728675                                                                     | 276.7027765 | 1245.203305        |        |
| 273.4163702     | 2.187908608                                                                     | 5.98E-30    | 9.15E-27           | KIF14  |
| 1               | 200551497                                                                       | 200620734   | - 7277             |        |
| protein_coding  | kinesin family member 14 [Source:HGNC Symbol;Acc:HGNC:19181]                    |             |                    |        |
| 282             | 7.590383372                                                                     | 7.064478919 | 1520 300           | 265    |
| 1.993288202     | 1.586909269                                                                     | 1.809017505 | 9.675951188        |        |
| ENSG00000166851 | 1811.801984                                                                     | 2178.335181 | 3182.733845        |        |
| 323.4741875     | 447.7913399                                                                     | 521.0254408 | 2390.957003        |        |
| 430.7636561     | 2.472585103                                                                     | 3.01E-29    | 4.19E-26           | PLK1   |
| 16              | 23677656                                                                        | 23690367    | + 4760             |        |

|                 |                                                      |                        |                       |      |             |       |       |      |     |             |
|-----------------|------------------------------------------------------|------------------------|-----------------------|------|-------------|-------|-------|------|-----|-------------|
| protein_coding  | polo like kinase 1 [Source:HGNC                      | Symbol;Acc:HGNC:9077]  |                       |      |             |       |       |      |     |             |
| -               | 1566                                                 | 2350                   | 3255                  | 322  | 490         | 531   |       |      |     |             |
| 17.99200312     | 21.76681407                                          |                        | 31.6771788            |      | 3.270770977 |       |       |      |     |             |
| 4.485880757     | 5.207551867                                          |                        |                       |      |             |       |       |      |     |             |
| ENSG00000137807 | 1969.148772                                          |                        | 1642.557422           |      | 2560.854052 |       |       |      |     |             |
| 530.4173012     | 491.656614                                           |                        | 464.1149407           |      | 2057.520082 |       |       |      |     |             |
| 495.3962853     | 2.054308954                                          |                        | 5.36E-29              |      | 6.82E-26    | KIF23 |       |      |     |             |
| 15              | 69414246                                             |                        | 69448427              |      | +           | 6576  |       |      |     |             |
| protein_coding  | kinesin family member 23 [Source:HGNC                | Symbol;Acc:HGNC:6392]  | -                     | 1702 | 1772        | 2619  | 528   | 538  |     |             |
| 473             | 14.15443257                                          |                        | 11.88053152           |      | 18.44914099 |       |       |      |     |             |
| 3.882159142     | 3.565160358                                          |                        | 3.357726916           |      |             |       |       |      |     |             |
| ENSG00000113810 | 5745.471682                                          |                        | 4838.684955           |      | 6340.04493  |       |       |      |     |             |
| 2022.215961     | 1828.633615                                          |                        | 1885.896228           |      | 5641.400522 |       |       |      |     |             |
| 1912.248601     | 1.56079422                                           |                        | 8.30E-29              |      | 9.76E-26    |       | SMC4  |      |     |             |
| 3               | 160399274                                            |                        | 160434962             |      | +           | 8457  |       |      |     |             |
| protein_coding  | structural maintenance of chromosomes 4 [Source:HGNC | Symbol;Acc:HGNC:14013] | -                     | 4966 | 5220        | 6484  | 2013  | 2001 |     |             |
| 1922            | 32.1133119                                           |                        | 27.21373368           |      | 35.51641577 |       |       |      |     |             |
| 11.50876337     | 10.31072861                                          |                        | 10.60921104           |      |             |       |       |      |     |             |
| ENSG00000145386 | 1986.503197                                          |                        | 2264.541637           |      | 3090.820793 |       |       |      |     |             |
| 591.6965728     | 568.4208438                                          |                        | 390.5237767           |      | 2447.288543 |       |       |      |     |             |
| 516.8803978     | 2.24338173                                           |                        | 1.73E-28              |      | 1.83E-25    |       | CCNA2 |      |     |             |
| 4               | 121816444                                            |                        | 121823933             |      | -           | 2798  |       |      |     |             |
| protein_coding  | cyclin A2 [Source:HGNC                               | Symbol;Acc:HGNC:1578]  | -                     | 1717 | 2443        | 3161  | 589   | 622  | 398 | 33.55964033 |
| 38.49547783     | 52.33343501                                          |                        | 10.17814893           |      | 9.687267053 |       |       |      |     |             |
| 6.64020363      |                                                      |                        |                       |      |             |       |       |      |     |             |
| ENSG00000109805 | 2250.290459                                          |                        | 1750.083754           |      | 2524.675511 |       |       |      |     |             |
| 580.6462123     | 623.2524364                                          |                        | 534.7624581           |      | 2175.016575 |       |       |      |     |             |
| 579.5537023     | 1.907649958                                          |                        | 1.80E-28              |      | 1.83E-25    |       | NCAPG |      |     |             |
| 4               | 17810902                                             |                        | 17844862              |      | +           | 4921  |       |      |     |             |
| protein_coding  | non-SMC condensin I complex subunit G [Source:HGNC   | Symbol;Acc:HGNC:24304] | -                     | 1945 | 1888        | 2582  | 578   | 682  |     |             |
| 545             | 21.61528436                                          |                        | 16.91541211           |      | 24.30554304 |       |       |      |     |             |
| 5.679049968     | 6.039341771                                          |                        | 5.169983691           |      |             |       |       |      |     |             |
| ENSG00000138180 | 1502.893217                                          |                        | 1354.275617           |      | 1736.569987 |       |       |      |     |             |
| 434.9823701     | 409.4092251                                          |                        | 330.6696301           |      | 1531.246274 |       |       |      |     |             |
| 391.6870751     | 1.966870859                                          |                        | 4.51E-28              |      | 4.31E-25    |       | CEP55 |      |     |             |
| 10              | 93496632                                             |                        | 93529092              |      | +           | 3271  |       |      |     |             |
| protein_coding  | centrosomal protein 55 [Source:HGNC                  | Symbol;Acc:HGNC:1161]  | -                     | 1299 | 1461        | 1776  | 433   | 448  |     |             |
| 337             | 21.71817457                                          |                        | 19.69262586           |      | 25.15155689 |       |       |      |     |             |
| 6.400421401     | 5.96837452                                           |                        | 4.809449762           |      |             |       |       |      |     |             |
| ENSG00000198830 | 13740.07686                                          |                        | 13586.32287           |      | 17412.6342  |       |       |      |     |             |
| 5173.577843     | 5575.459112                                          |                        | 5599.79697            |      | 14913.01131 |       |       |      |     |             |
| 5449.611308     | 1.452351544                                          |                        | 2.04E-27              |      | 1.83E-24    |       | HMGN2 |      |     |             |
| 1               | 26472450                                             |                        | 26475972              |      | +           | 2509  |       |      |     |             |
| protein_coding  | high mobility group nucleosomal binding domain 2     | [Source:HGNC           | Symbol;Acc:HGNC:4986] | -    | 11876       | 14657 | 17808 |      |     |             |

|                 |                                                                          |             |             |             |             |
|-----------------|--------------------------------------------------------------------------|-------------|-------------|-------------|-------------|
| 5150            | 6101                                                                     | 5707        | 258.8595789 | 257.5599811 |             |
| 328.7887442     | 99.24480533                                                              |             | 105.9641507 | 106.1825735 |             |
| ENSG00000134057 | 3061.320594                                                              |             | 2934.727312 | 4276.890272 |             |
| 879.0059443     | 958.6390114                                                              |             | 1042.050882 | 3424.312726 |             |
| 959.8986125     | 1.834896303                                                              |             | 2.65E-27    | 2.25E-24    | CCNB1       |
| 5               | 69167010                                                                 |             | 69178245    | +           | 2558        |
| protein_coding  | cyclin B1 [Source:HGNC Symbol;Acc:HGNC:1579]                             |             |             |             | -           |
| 2646            | 3166                                                                     | 4374        | 875         | 1049        | 1062        |
| 54.56879056     |                                                                          | 79.21012422 |             | 16.53898028 | 56.56971783 |
| 19.3807247      |                                                                          |             |             |             | 17.87037005 |
| ENSG00000140416 | 12895.49484                                                              |             | 10360.5329  | 14291.50165 |             |
| 4403.066347     | 3835.469906                                                              |             | 4503.779234 | 12515.84313 |             |
| 4247.438496     | 1.559109297                                                              |             | 3.63E-27    | 2.92E-24    | TPM1        |
| 15              | 63042632                                                                 |             | 63071915    | +           | 12876       |
| protein_coding  | tropomyosin 1 [Source:HGNC Symbol;Acc:HGNC:12010]                        |             |             |             |             |
| -               | 11146                                                                    | 11177       | 14616       | 4383        | 4197        |
| 47.34049378     | 38.27174293                                                              |             | 52.58356446 | 16.45855561 | 4590        |
| 14.20419412     | 16.64093612                                                              |             |             |             |             |
| ENSG00000171241 | 1322.407195                                                              |             | 1110.487467 | 1627.056564 |             |
| 354.6161124     | 293.3490207                                                              |             | 328.707199  | 1353.317076 |             |
| 325.557444      | 2.055914112                                                              |             | 7.61E-27    | 5.82E-24    | SHCBP1      |
| 16              | 46580554                                                                 |             | 46621626    | -           | 4459        |
| protein_coding  | SHC binding and spindle associated 1 [Source:HGNC Symbol;Acc:HGNC:29547] |             |             |             |             |
| 335             | 14.01856213                                                              |             | 1143        | 1198        | 1664        |
| 3.827704912     | 3.137084073                                                              |             | 11.84549745 | 17.2869472  | 353         |
| ENSG00000089685 | 2543.001763                                                              |             | 2593.609292 | 4092.086372 | 321         |
| 752.4290883     | 608.6306784                                                              |             | 798.7094328 | 3076.232476 |             |
| 719.9230665     | 2.095656073                                                              |             | 8.50E-27    | 6.19E-24    | BIRC5       |
| 17              | 78214186                                                                 |             | 78225636    | +           | 3815        |
| protein_coding  | baculoviral IAP repeat containing 5 [Source:HGNC Symbol;Acc:HGNC:593]    |             |             |             |             |
| 814             | 31.50850943                                                              |             | 2198        | 2798        | 4185        |
| 9.49267237      | 7.607435601                                                              |             | 32.33606177 | 50.81633926 | 749         |
| ENSG00000117650 | 963.7490759                                                              |             | 897.2887043 | 1253.53757  | 666         |
| 251.1445555     | 239.4312879                                                              |             | 231.5668626 | 1038.191783 |             |
| 240.7142353     | 2.108874732                                                              |             | 9.33E-27    | 6.48E-24    | NEK2        |
| 1               | 211658657                                                                |             | 211675630   | -           | 3095        |
| protein_coding  | NIMA related kinase 2 [Source:HGNC Symbol;Acc:HGNC:7745]                 |             |             |             |             |
| 236             | 14.7190256                                                               |             | 833         | 968         | 1282        |
| 3.905535339     | 3.688919989                                                              |             | 13.78950453 | 19.18800521 | 250         |
| ENSG00000138778 | 1384.883126                                                              |             | 1151.273317 | 1784.482109 | 262         |
| 321.465031      | 237.6035681                                                              |             | 157.9756986 | 1440.212851 |             |
| 239.0147659     | 2.591466288                                                              |             | 1.35E-26    | 8.99E-24    | CENPE       |
| 4               | 103105806                                                                |             | 103198409   | -           | 9444        |
| protein_coding  | centromere protein E [Source:HGNC Symbol;Acc:HGNC:1856]                  |             |             |             |             |
| 161             | 6.931590291                                                              |             | 1197        | 1242        | 1825        |
| 1.638306734     | 1.199709139                                                              |             | 0.795821987 | 8.951778883 | 320         |
|                 |                                                                          |             |             |             | 260         |

|                 |                                                                                    |             |             |             |
|-----------------|------------------------------------------------------------------------------------|-------------|-------------|-------------|
| ENSG00000164176 | 3323.950894                                                                        | 2544.480882 | 3698.03361  |             |
| 934.2577465     | 958.6390114                                                                        | 1016.539278 | 3188.821795 |             |
| 969.812012      | 1.717098861                                                                        | 2.71E-26    | 1.73E-23    | EDIL3       |
| 5               | 83940554                                                                           | 84384793    | - 5738      |             |
| protein_coding  | EGF like repeats and discoidin domains 3 [Source:HGNC Symbol;Acc:HGNC:3173]        |             |             |             |
|                 | -                                                                                  | 2873 2745   | 3782 930    | 1049        |
| 1036            | 27.38229184                                                                        | 21.09190288 | 30.53257527 |             |
| 7.836526763     | 7.966609724                                                                        | 8.428402113 |             |             |
| ENSG00000157456 | 1225.222415                                                                        | 1082.678933 | 1676.924284 |             |
| 272.2406982     | 260.4500651                                                                        | 337.5381387 | 1328.27521  |             |
| 290.0763006     | 2.195386016                                                                        | 2.88E-26    | 1.76E-23    | CCNB2       |
| 15              | 59105078                                                                           | 59125045    | + 2801      |             |
| protein_coding  | cyclin B2 [Source:HGNC Symbol;Acc:HGNC:1580]                                       |             |             |             |
|                 | -                                                                                  |             |             | -           |
| 1059            | 1168 1715                                                                          | 271 285     | 344         | 20.67652563 |
|                 | 18.38500244                                                                        | 28.36308532 | 4.677969636 | 4.433945482 |
|                 | 5.733124455                                                                        |             |             |             |
| ENSG00000101447 | 1143.078136                                                                        | 1065.993812 | 1820.660651 |             |
| 276.2590111     | 249.4837465                                                                        | 282.5900696 | 1343.244199 |             |
| 269.4442757     | 2.318114995                                                                        | 3.14E-26    | 1.85E-23    | FAM83D      |
| 20              | 38926312                                                                           | 38953106    | + 2475      |             |
| protein_coding  | family with sequence similarity 83 member D [Source:HGNC Symbol;Acc:HGNC:16122]    |             |             |             |
|                 | -                                                                                  |             | 988 1150    | 1862        |
| 275             | 273 288                                                                            | 21.83114198 | 20.48597296 |             |
| 34.85033276     | 5.372280832                                                                        | 4.806689199 | 5.432044516 |             |
| ENSG00000169679 | 1744.698207                                                                        | 1446.04378  | 1998.619963 |             |
| 417.9045404     | 536.435748                                                                         | 438.6033372 | 1729.787316 |             |
| 464.3145419     | 1.896750212                                                                        | 7.39E-26    | 4.19E-23    | BUB1        |
| 2               | 110637698                                                                          | 110678114   | - 6032      |             |
| protein_coding  | BUB1 mitotic checkpoint serine/threonine kinase [Source:HGNC Symbol;Acc:HGNC:1148] |             |             |             |
|                 | -                                                                                  |             | 1508 1560   | 2044        |
| 416             | 587 447                                                                            | 13.67208411 | 11.40242498 |             |
| 15.69719359     | 3.334519137                                                                        | 4.240678673 | 3.459331855 |             |
| ENSG00000080986 | 1088.700937                                                                        | 1050.235643 | 1612.389588 |             |
| 271.2361199     | 272.3302435                                                                        | 182.5060866 | 1250.442056 |             |
| 242.02415       | 2.369084925                                                                        | 9.20E-26    | 5.02E-23    | NDC80       |
| 18              | 2571511 2616635                                                                    | + 3600      |             |             |
| protein_coding  | "NDC80, kinetochore complex component [Source:HGNC Symbol;Acc:HGNC:16909]"         |             |             |             |
|                 | -                                                                                  | 941 1133    | 1649 270    | 298         |
| 186             | 14.2949235                                                                         | 13.87590657 | 21.21878981 |             |
| 3.626289562     | 3.607217764                                                                        | 2.411884349 |             |             |
| ENSG00000112742 | 1330.505927                                                                        | 973.2986979 | 1482.342399 |             |
| 321.465031      | 279.6411225                                                                        | 304.176811  | 1262.049008 |             |
| 301.7609882     | 2.064338886                                                                        | 1.79E-25    | 9.41E-23    | TTK         |
| 6               | 80003887                                                                           | 80042527    | + 4579      |             |
| protein_coding  | TTK protein kinase [Source:HGNC Symbol;Acc:HGNC:12401]                             |             |             |             |
|                 | -                                                                                  | 1150 1050   | 1516 320    | 306 310     |
| 13.73478639     | 10.11003394                                                                        | 15.3366679  | 3.378940554 |             |
| 2.912120762     | 3.160363855                                                                        |             |             |             |
| ENSG00000088325 | 5677.210943                                                                        | 5294.744917 | 8317.153328 |             |
| 1791.16297      | 1888.034507                                                                        | 2004.623306 | 6429.703062 |             |

|                         |                                                       |             |             |        |
|-------------------------|-------------------------------------------------------|-------------|-------------|--------|
| 1894.606928             | 1.762884343                                           | 2.20E-25    | 1.12E-22    | TPX2   |
| 20                      | 31739271                                              | 31801805    | + 3605      |        |
| protein_coding          | "TPX2, microtubule nucleation factor [Source:HGNC     |             |             |        |
| Symbol;Acc:HGNC:1249]"  | -                                                     | 4907 5712   | 8506 1783   | 2066   |
| 2043                    | 74.43985211                                           | 69.85811901 | 109.3006048 |        |
| 23.9137283              | 24.97374344                                           | 26.4550833  |             |        |
| ENSG00000138160         | 2199.384146                                           | 1887.272523 | 2951.973418 |        |
| 576.6278994             | 701.8443859                                           | 555.367984  | 2346.210029 |        |
| 611.2800898             | 1.94009167                                            | 3.53E-25    | 1.74E-22    | KIF11  |
| 10                      | 92593286                                              | 92655395    | + 4860      |        |
| protein_coding          | kinesin family member 11 [Source:HGNC                 |             |             |        |
| Symbol;Acc:HGNC:6388]"  | -                                                     | 1901 2036   | 3019 574    | 768    |
| 566                     | 21.39146658                                           | 18.47036434 | 28.77592544 |        |
| 5.710535552             | 6.8862621                                             | 5.436585191 |             |        |
| ENSG00000137801         | 1092.171822                                           | 1835.363259 | 2315.426649 |        |
| 353.6115342             | 288.7797213                                           | 338.5193542 | 1747.65391  |        |
| 326.9702032             | 2.419046661                                           | 3.73E-25    | 1.78E-22    | THBS1  |
| 15                      | 39581079                                              | 39599466    | + 9158      |        |
| protein_coding          | thrombospondin 1 [Source:HGNC Symbol;Acc:HGNC:11785]" |             |             |        |
| -                       | 944 1980                                              | 2368 352    | 316 345     |        |
| 5.637234068             | 9.532317714                                           | 11.9779781  | 1.858417305 |        |
| 1.503644054             | 1.758589564                                           |             |             |        |
| ENSG00000137812         | 1283.070498                                           | 974.225649  | 1812.838264 |        |
| 287.3093715             | 286.0381416                                           | 248.2475264 | 1356.71147  |        |
| 273.8650132             | 2.308440825                                           | 4.30E-25    | 1.99E-22    | KNL1   |
| 15                      | 40594020                                              | 40664342    | + 10250     |        |
| protein_coding          | kinetochore scaffold 1 [Source:HGNC                   |             |             |        |
| Symbol;Acc:HGNC:24054]" | -                                                     | 1109 1051   | 1854 286    | 313    |
| 253                     | 5.91701123                                            | 4.520774125 | 8.378925331 |        |
| 1.349097645             | 1.330696669                                           | 1.152239321 |             |        |
| ENSG00000087586         | 1765.523517                                           | 1962.355565 | 3077.131616 |        |
| 516.3532061             | 514.503111                                            | 582.8420186 | 2268.336899 |        |
| 537.8994452             | 2.076526476                                           | 1.06E-24    | 4.76E-22    | AURKA  |
| 20                      | 56369389                                              | 56392337    | - 2928      |        |
| protein_coding          | aurora kinase A [Source:HGNC Symbol;Acc:HGNC:11393]"  |             |             |        |
| -                       | 1526 2117                                             | 3147 514    | 563 594     |        |
| 28.50218627             | 31.87746251                                           | 49.78839499 | 8.487763364 |        |
| 8.37907196              | 9.470249227                                           |             |             |        |
| ENSG00000117724         | 3585.424233                                           | 2869.840732 | 5004.372294 |        |
| 1102.02231              | 919.3430367                                           | 1021.445356 | 3819.879086 |        |
| 1014.270234             | 1.913229481                                           | 2.30E-24    | 1.00E-21    | CENPF  |
| 1                       | 214603195                                             | 214664588   | + 11690     |        |
| protein_coding          | centromere protein F [Source:HGNC                     |             |             |        |
| Symbol;Acc:HGNC:1857]"  | -                                                     | 3099 3096   | 5118 1097   | 1006   |
| 1041                    | 14.4977891                                            | 11.67670743 | 20.28094682 |        |
| 4.537256515             | 3.750093252                                           | 4.157021342 |             |        |
| ENSG00000138182         | 1789.819712                                           | 1391.353662 | 1851.9502   |        |
| 501.2845328             | 508.1060918                                           | 388.5613457 | 1677.707858 |        |
| 465.9839901             | 1.847699076                                           | 2.64E-24    | 1.12E-21    | KIF20B |
| 10                      | 89701610                                              | 89774939    | + 6851      |        |

|                                     |                                                   |             |             |             |      |        |
|-------------------------------------|---------------------------------------------------|-------------|-------------|-------------|------|--------|
| protein_coding                      | kinesin family member 20B [Source:HGNC            |             |             |             |      |        |
| Symbol;Acc:HGNC:7212]               | -                                                 | 1547        | 1501        | 1894        | 499  | 556    |
| 396                                 | 12.34897919                                       | 9.65963425  |             | 12.80644129 |      |        |
| 3.521663001                         | 3.5365469                                         | 2.698281491 |             |             |      |        |
| ENSG00000166803                     | 1004.242735                                       | 723.948841  |             | 1004.198973 |      |        |
| 229.0438346                         | 168.1502174                                       | 207.0364746 |             | 910.7968496 |      |        |
| 201.4101756                         | 2.177481188                                       | 7.17E-24    |             | 2.96E-21    |      | PCLAF  |
| 15                                  | 64364311                                          | 64387687    |             | -           | 3734 |        |
| protein_coding                      | PCNA clamp associated factor [Source:HGNC         |             |             |             |      |        |
| Symbol;Acc:HGNC:28961]              | -                                                 | 868         | 781         | 1027        | 228  | 184    |
| 211                                 | 12.71276808                                       | 9.221693387 |             | 12.74085537 |      |        |
| 2.952308588                         | 2.147346393                                       | 2.637874791 |             |             |      |        |
| ENSG00000183856                     | 1484.38183                                        | 1616.60279  |             | 2313.471053 |      |        |
| 496.2616417                         | 378.3379893                                       | 479.814389  |             | 1804.818557 |      |        |
| 451.47134                           | 1.999883093                                       | 8.81E-24    |             | 3.54E-21    |      | IQGAP3 |
| 1                                   | 156525405                                         | 156572604   |             | -           | 6742 |        |
| protein_coding                      | IQ motif containing GTPase activating protein 3   |             |             |             |      |        |
| [Source:HGNC Symbol;Acc:HGNC:20669] | -                                                 |             |             | 1283        | 1744 | 2366   |
| 494                                 | 414                                               | 489         | 10.40716933 | 11.40490548 |      |        |
| 16.25655239                         | 3.542741113                                       | 2.675901917 |             | 3.385837781 |      |        |
| ENSG00000163453                     | 335.518886                                        | 842.598587  |             | 1059.933483 |      |        |
| 64.29300621                         | 65.79791117                                       | 87.32818123 |             | 746.0169854 |      |        |
| 72.47303287                         | 3.364849826                                       | 2.39E-23    |             | 9.35E-21    |      | IGFBP7 |
| 4                                   | 57030773                                          | 57110385    |             | -           | 1930 |        |
| protein_coding                      | insulin like growth factor binding protein 7      |             |             |             |      |        |
| [Source:HGNC Symbol;Acc:HGNC:5476]  | -                                                 |             |             | 290         | 909  | 1084   |
| 64                                  | 72                                                | 89          | 8.217418428 | 20.76541104 |      |        |
| 26.01803113                         | 1.603333554                                       | 1.625675217 |             | 2.15267632  |      |        |
| ENSG00000139734                     | 1690.321008                                       | 1370.960737 |             | 1994.708769 |      |        |
| 430.9640572                         | 539.1773277                                       | 421.9226734 |             | 1685.330172 |      |        |
| 464.0213528                         | 1.860146899                                       | 2.45E-23    |             | 9.38E-21    |      | DIAPH3 |
| 13                                  | 59665583                                          | 60163987    |             | -           | 7442 |        |
| protein_coding                      | diaphanous related formin 3 [Source:HGNC          |             |             |             |      |        |
| Symbol;Acc:HGNC:15480]              | -                                                 | 1461        | 1479        | 2040        | 429  | 590    |
| 430                                 | 10.73631544                                       | 8.762185966 |             | 12.69822323 |      |        |
| 2.787204554                         | 3.454784351                                       | 2.697272507 |             |             |      |        |
| ENSG00000090889                     | 2676.052356                                       | 2155.161402 |             | 3614.920745 |      |        |
| 756.4474012                         | 852.6312656                                       | 703.5315275 |             | 2815.378168 |      |        |
| 770.8700648                         | 1.868564691                                       | 2.61E-23    |             | 9.72E-21    |      | KIF4A  |
| X                                   | 70290090                                          | 70420832    |             | +           | 4533 |        |
| protein_coding                      | kinesin family member 4A [Source:HGNC             |             |             |             |      |        |
| Symbol;Acc:HGNC:13339]              | -                                                 | 2313        | 2325        | 3697        | 753  | 933    |
| 717                                 | 27.90516703                                       | 22.6136776  |             | 37.7803683  |      |        |
| 8.031755394                         | 8.969216815                                       | 7.38379231  |             |             |      |        |
| ENSG00000156970                     | 1204.397104                                       | 1179.081851 |             | 1750.259165 |      |        |
| 391.7855066                         | 348.1806133                                       | 334.5944921 |             | 1377.912707 |      |        |
| 358.1868707                         | 1.944083158                                       | 6.65E-23    |             | 2.42E-20    |      | BUB1B  |
| 15                                  | 40161023                                          | 40221136    |             | +           | 4476 |        |
| protein_coding                      | BUB1 mitotic checkpoint serine/threonine kinase B |             |             |             |      |        |
| [Source:HGNC Symbol;Acc:HGNC:1149]  | -                                                 |             |             | 1041        | 1272 | 1790   |

|                         |                                         |             |                                        |             |                 |
|-------------------------|-----------------------------------------|-------------|----------------------------------------|-------------|-----------------|
| 390                     | 381                                     | 341         | 12.7190702                             | 12.52942069 |                 |
| 18.52530679             | 4.21284757                              |             | 3.709313119                            | 3.556397833 |                 |
| ENSG00000068489         | 1477.44006                              |             | 1130.880392                            | 2098.355401 |                 |
| 407.8587581             | 315.2816577                             |             | 307.1204576                            | 1568.891951 |                 |
| 343.4202911             | 2.192038103                             |             | 1.20E-22                               | 4.27E-20    | PRR11           |
| 17                      | 59155499                                |             | 59204705                               | + 4080      |                 |
| protein_coding          | proline rich                            | 11          | [Source:HGNC Symbol;Acc:HGNC:25619]    |             |                 |
| -                       | 1277                                    | 1220        | 2146                                   | 406         | 345 313         |
| 17.11691314             | 13.18358809                             |             | 24.36531387                            | 4.81135151  |                 |
| 3.684830622             | 3.581213478                             |             |                                        |             |                 |
| ENSG00000156802         | 4622.061894                             |             | 4049.849534                            | 4893.881073 |                 |
| 1416.455293             | 1673.277436                             |             | 1882.952582                            | 4521.930834 |                 |
| 1657.56177              | 1.447740973                             |             | 2.16E-22                               | 7.51E-20    | ATAD2           |
| 8                       | 123319850                               |             | 123416350                              | - 7118      |                 |
| protein_coding          | "ATPase family,                         |             | AAA domain containing 2 [Source:HGNC   |             |                 |
| Symbol;Acc:HGNC:30123]" | -                                       |             | 3995                                   | 4369        | 5005 1410 1831  |
| 1919                    | 30.69400169                             |             | 27.06188343                            | 32.57230959 |                 |
| 9.577724609             | 11.20957013                             |             | 12.58528419                            |             |                 |
| ENSG00000186185         | 1140.764212                             |             | 1261.580503                            | 2168.756887 |                 |
| 292.3322626             | 364.6300911                             |             | 307.1204576                            | 1523.700534 |                 |
| 321.3609371             | 2.245197124                             |             | 4.37E-22                               | 1.49E-19    | KIF18B          |
| 17                      | 44924709                                |             | 44947711                               | - 4655      |                 |
| protein_coding          | kinesin family member 18B               |             | [Source:HGNC                           |             |                 |
| Symbol;Acc:HGNC:27102]" | -                                       |             | 986                                    | 1361        | 2218 291 399    |
| 313                     | 11.58382379                             |             | 12.8905782                             | 22.0721334  |                 |
| 3.022557143             | 3.735182345                             |             | 3.138850911                            |             |                 |
| ENSG00000177283         | 1729.657705                             |             | 2422.123331                            | 1652.479323 |                 |
| 6065.643305             | 5112.132154                             |             | 6742.91305                             | 1934.753453 |                 |
| 5973.562836             | -1.626021683                            |             | 6.41E-22                               | 2.13E-19    | FZD8            |
| 10                      | 35638249                                |             | 35642278                               | - 4030      |                 |
| protein_coding          | frizzled class receptor 8               |             | [Source:HGNC                           |             |                 |
| Symbol;Acc:HGNC:4046]"  | -                                       |             | 1495                                   | 2613        | 1690 6038 5594  |
| 6872                    | 20.28760868                             |             | 28.58698288                            | 19.42603265 |                 |
| 72.44180769             | 60.48894551                             |             | 79.60202951                            |             |                 |
| ENSG00000163535         | 1507.521063                             |             | 1054.870398                            | 1379.673565 |                 |
| 353.6115342             | 423.1171232                             |             | 349.3127249                            | 1314.021676 |                 |
| 375.3471274             | 1.806689745                             |             | 2.11E-21                               | 6.85E-19    | SG02            |
| 2                       | 200510008                               |             | 200583782                              | + 6022      |                 |
| protein_coding          | shugoshin 2                             |             | [Source:HGNC Symbol;Acc:HGNC:30812]" - |             |                 |
| 1303                    | 1138                                    | 1411        | 352                                    | 463         | 356 11.83309571 |
| 8.331735395             |                                         | 10.85397254 | 2.826201541                            | 3.350416799 |                 |
| 2.759658119             |                                         |             |                                        |             |                 |
| ENSG00000146918         | 2103.356326                             |             | 1925.27752                             | 2681.123257 |                 |
| 629.8705452             | 814.2491508                             |             | 710.4000361                            | 2236.585701 |                 |
| 718.173244              | 1.638571192                             |             | 4.05E-21                               | 1.29E-18    | NCAPG2          |
| 7                       | 158631311                               |             | 158704829                              | - 6988      |                 |
| protein_coding          | non-SMC condensin II complex subunit G2 |             | [Source:HGNC                           |             |                 |
| Symbol;Acc:HGNC:21904]" | -                                       |             | 1818                                   | 2077        | 2742 627 891    |
| 724                     | 14.22773263                             |             | 13.10441259                            | 18.17678247 |                 |
| 4.338262842             | 5.556270817                             |             | 4.83650572                             |             |                 |



|                 |                                                                                  |             |                |        |
|-----------------|----------------------------------------------------------------------------------|-------------|----------------|--------|
| ENSG00000135476 | 866.5642951                                                                      | 897.2887043 | 1369.895581    |        |
| 255.1628684     | 262.2777848                                                                      | 251.191173  | 1044.58286     |        |
| 256.2106087     | 2.027767719                                                                      | 4.24E-21    | 1.32E-18       | ESPL1  |
| 12              | 53268299                                                                         | 53293643    | + 8890         |        |
| protein_coding  | "extra spindle pole bodies like 1, separase [Source:HGNC Symbol;Acc:HGNC:16856]" |             |                |        |
|                 | -                                                                                |             | 749 968        | 1401   |
| 254             | 287 256                                                                          | 4.607599999 | 4.800733018    |        |
| 7.300268443     | 1.381443643                                                                      | 1.406820647 | 1.344262985    |        |
| ENSG00000123485 | 990.3591944                                                                      | 1022.427108 | 1393.362743    |        |
| 339.547439      | 276.8995429                                                                      | 320.8574749 | 1135.383015    |        |
| 312.4348189     | 1.862338071                                                                      | 5.01E-21    | 1.53E-18       | HJURP  |
| 2               | 233833416                                                                        | 233854566   | - 3821         |        |
| protein_coding  | Holliday junction recognition protein [Source:HGNC Symbol;Acc:HGNC:25444]        |             |                |        |
|                 | -                                                                                | 856 1103    | 1425 338       | 303    |
| 327             | 12.25156137                                                                      | 12.72718722 | 17.27588413    |        |
| 4.277016041     | 3.455605755                                                                      | 3.994999698 |                |        |
| ENSG00000162511 | 3820.287453                                                                      | 3923.784179 | 6080.92835     |        |
| 1469.697939     | 1184.362401                                                                      | 1495.372452 | 4608.333328    |        |
| 1383.144264     | 1.736548288                                                                      | 5.23E-21    | 1.57E-18       | LAPTM5 |
| 1               | 30732469                                                                         | 30757820    | - 3274         |        |
| protein_coding  | lysosomal protein transmembrane 5 [Source:HGNC Symbol;Acc:HGNC:29612]            |             |                |        |
|                 | -                                                                                | 3302 4233   | 6219 1463      | 1296   |
| 1524            | 55.15604365                                                                      | 57.00376636 | 87.9922327     |        |
| 21.60562667     | 17.24983416                                                                      | 21.72962981 |                |        |
| ENSG00000175063 | 1796.761482                                                                      | 1997.579709 | 3129.93273     |        |
| 539.4585052     | 618.683137                                                                       | 677.0387084 | 2308.091307    |        |
| 611.7267836     | 1.915881709                                                                      | 6.85E-21    | 2.01E-18       | UBE2C  |
| 20              | 45812576                                                                         | 45816957    | + 1286         |        |
| protein_coding  | ubiquitin conjugating enzyme E2 C [Source:HGNC Symbol;Acc:HGNC:15937]            |             |                |        |
|                 | -                                                                                | 1553 2155   | 3201 537       | 677    |
| 690             | 66.04275776                                                                      | 73.88227568 | 115.3047401    |        |
| 20.189917       | 22.94068057                                                                      | 25.04691016 |                |        |
| ENSG00000111206 | 1595.450151                                                                      | 1789.942653 | 3021.397106    |        |
| 577.6324777     | 489.8288943                                                                      | 497.4762684 | 2135.596637    |        |
| 521.6458801     | 2.033918969                                                                      | 1.07E-20    | 3.08E-18       | FOXM1  |
| 12              | 2857681 2877155                                                                  | - 4899      | protein_coding |        |
| forkhead box M1 | [Source:HGNC Symbol;Acc:HGNC:3818] Fork                                          |             |                | 1379   |
| 1931            | 3090 575                                                                         | 536 507     | 15.39400203    |        |
| 17.37836011     | 29.21820257                                                                      | 5.674944541 | 4.767777151    |        |
| 4.83110588      |                                                                                  |             |                |        |
| ENSG00000114346 | 3137.680065                                                                      | 2788.269032 | 3436.961433    |        |
| 1071.884963     | 1301.336465                                                                      | 1245.162494 | 3120.970176    |        |
| 1206.127974     | 1.371349167                                                                      | 1.42E-20    | 4.02E-18       | ECT2   |
| 3               | 172750682                                                                        | 172821474   | + 5499         |        |
| protein_coding  | epithelial cell transforming 2 [Source:HGNC Symbol;Acc:HGNC:3155]                |             |                |        |
|                 | -                                                                                | 2712 3008   | 3515 1067      | 1424   |
| 1269            | 26.97122539                                                                      | 24.11726582 | 29.61038577    |        |
| 9.381708099     | 11.28456617                                                                      | 10.77268444 |                |        |
| ENSG00000168078 | 1103.741439                                                                      | 1137.36905  | 1415.852107    |        |
| 250.1399773     | 384.7350084                                                                      | 208.9989056 | 1218.987532    |        |

|                        |                                                       |                        |                |        |
|------------------------|-------------------------------------------------------|------------------------|----------------|--------|
| 281.2912971            | 2.114480034                                           | 1.45E-20               | 4.04E-18       | PBK    |
| 8                      | 27809620                                              | 27838095               | - 2165         |        |
| protein_coding         | PDZ binding kinase [Source:HGNC                       | Symbol;Acc:HGNC:18282] |                |        |
| -                      | 954 1227                                              | 1448 249               | 421 213        |        |
| 24.09823231            | 24.98737416                                           | 30.98226163            | 5.560868982    |        |
| 8.47388943             | 4.592696413                                           |                        |                |        |
| ENSG00000197594        | 3635.173585                                           | 2245.075663            | 4343.380565    |        |
| 735.3512585            | 771.2977365                                           | 1048.91939             | 3407.876604    |        |
| 851.8561285            | 2.000118872                                           | 1.55E-20               | 4.23E-18       | ENPP1  |
| 6                      | 131808016                                             | 131895155              | + 9959         |        |
| protein_coding         | ectonucleotide pyrophosphatase/phosphodiesterase 1    |                        |                |        |
| [Source:HGNC           | Symbol;Acc:HGNC:3356]                                 | -                      | 3142 2422      | 4442   |
| 732                    | 844 1069                                              | 17.25381595            | 10.72240888    |        |
| 20.66166319            | 3.553829313                                           | 3.693051058            | 5.010810845    |        |
| ENSG00000076382        | 1847.667796                                           | 1792.723506            | 2793.570075    |        |
| 550.5088657            | 609.5445382                                           | 702.5503119            | 2144.653792    |        |
| 620.8679053            | 1.788485321                                           | 2.82E-20               | 7.57E-18       | SPAG5  |
| 17                     | 28577565                                              | 28599279               | - 5472         |        |
| protein_coding         | sperm associated antigen 5 [Source:HGNC               |                        |                |        |
| Symbol;Acc:HGNC:13452] | -                                                     | 1597 1934              | 2857 548       | 667    |
| 716                    | 15.96075901                                           | 15.58275846            | 24.18614251    |        |
| 4.84212154             | 5.311758762                                           | 6.108196073            |                |        |
| ENSG00000024526        | 1925.184228                                           | 1359.837324            | 2212.757816    |        |
| 211.9660048            | 448.7051998                                           | 440.5657682            | 1832.593123    |        |
| 367.078991             | 2.318897634                                           | 3.40E-20               | 8.95E-18       | DEPDC1 |
| 1                      | 68474152                                              | 68497221               | - 5904         |        |
| protein_coding         | DEP domain containing 1 [Source:HGNC                  |                        |                |        |
| Symbol;Acc:HGNC:22949] | -                                                     | 1664 1467              | 2263 211       | 491    |
| 449                    | 15.41351488                                           | 10.95513473            | 17.75581703    |        |
| 1.727974475            | 3.62404633                                            | 3.550144481            |                |        |
| ENSG00000092969        | 275.3568788                                           | 394.881186             | 433.1646984    |        |
| 38.17397244            | 24.67421669                                           | 59.85414669            | 367.8009211    |        |
| 40.9007786             | 3.172627192                                           | 7.26E-20               | 1.88E-17       | TGFB2  |
| 1                      | 218346235                                             | 218444619              | + 5151         |        |
| protein_coding         | transforming growth factor beta 2 [Source:HGNC        |                        |                |        |
| Symbol;Acc:HGNC:11768] | -                                                     | 238 426                | 443 38         | 27     |
| 61                     | 2.526853829                                           | 3.646296723            | 3.983956907    |        |
| 0.356691913            | 0.228418256                                           | 0.552820731            |                |        |
| ENSG00000198763        | 38766.31487                                           | 49660.48042            | 42059.02107    |        |
| 106074.419             | 93575.59601                                           | 93991.61583            | 43495.27212    |        |
| 97880.54362            | -1.170137182                                          | 1.50E-19               | 3.79E-17       | MT-ND2 |
| MT                     | 4470 5511                                             | + 1042                 | protein_coding |        |
| mitochondrially        | encoded NADH:ubiquinone oxidoreductase core subunit 2 |                        |                |        |
| [Source:HGNC           | Symbol;Acc:HGNC:7456]                                 | -                      | 33507 53574    | 43014  |
| 105591                 | 102396 95791                                          | 1758.581659            | 2266.837103    |        |
| 1912.249551            | 4899.597455                                           | 4282.268265            | 4291.439793    |        |
| ENSG00000075218        | 857.3086017                                           | 1085.459786            | 1860.750386    |        |
| 216.988896             | 284.2104219                                           | 269.8342679            | 1267.839591    |        |
| 257.0111952            | 2.302474542                                           | 1.51E-19               | 3.79E-17       | GTSE1  |
| 22                     | 46296741                                              | 46330810               | + 4242         |        |

|                                                 |                                                        |             |             |             |      |                |             |
|-------------------------------------------------|--------------------------------------------------------|-------------|-------------|-------------|------|----------------|-------------|
| protein_coding                                  | G2 and S-phase expressed 1 [Source:HGNC                |             |             |             |      |                |             |
| Symbol;Acc:HGNC:13698]                          | -                                                      | 741         | 1171        | 1903        | 216  | 311            |             |
|                                                 | 275                                                    | 9.553054525 | 12.17082979 | 20.78119798 |      |                |             |
| 2.461978769                                     | 3.194834184                                            | 3.026272738 |             |             |      |                |             |
| ENSG00000165304                                 | 1914.771573                                            | 1735.252536 | 2291.959487 |             |      |                |             |
| 703.2047554                                     | 776.7808958                                            | 640.7337342 | 1980.661199 |             |      |                |             |
| 706.9064618                                     | 1.486154228                                            | 1.75E-19    | 4.31E-17    |             |      | MELK           |             |
|                                                 | 9                                                      | 36572862    | 36677683    | +           | 3087 |                |             |
| protein_coding                                  | maternal embryonic leucine zipper kinase [Source:HGNC  |             |             |             |      |                |             |
| Symbol;Acc:HGNC:16870]                          | -                                                      | 1655        | 1872        | 2344        | 700  | 850            |             |
|                                                 | 653                                                    | 29.3194677  | 26.73641495 | 35.17413561 |      |                |             |
| 10.96383843                                     | 11.99888508                                            | 9.874669925 |             |             |      |                |             |
| ENSG00000115884                                 | 1066.718665                                            | 1085.459786 | 1627.056564 |             |      |                |             |
| 285.3002151                                     | 328.075696                                             | 394.4486388 | 1259.745005 |             |      |                |             |
| 335.9415166                                     | 1.907012386                                            | 3.85E-19    | 9.34E-17    |             |      | SDC1           |             |
|                                                 | 2                                                      | 20200797    | 20225433    | -           | 3595 |                |             |
| protein_coding                                  | syndecan 1 [Source:HGNC Symbol;Acc:HGNC:10658]         |             |             |             |      |                |             |
|                                                 | 922                                                    | 1171        | 1664        | 284         | 359  | 402            | 14.02577085 |
|                                                 | 14.3612406                                             | 21.44158485 | 3.819624425 | 4.351651939 |      |                |             |
|                                                 | 5.220032347                                            |             |             |             |      |                |             |
| ENSG00000112972                                 | 1693.791893                                            | 1508.149506 | 1884.217548 |             |      |                |             |
| 621.8339194                                     | 683.5671883                                            | 592.6541738 | 1695.386316 |             |      |                |             |
| 632.6850938                                     | 1.421732786                                            | 5.67E-19    | 1.35E-16    |             |      | HMGCS1         |             |
|                                                 | 5                                                      | 43289395    | 43313512    | -           | 4702 |                |             |
| protein_coding                                  | 3-hydroxy-3-methylglutaryl-CoA synthase 1 [Source:HGNC |             |             |             |      |                |             |
| Symbol;Acc:HGNC:5007]                           | -                                                      | 1464        | 1627        | 1927        | 619  | 748            |             |
|                                                 | 604                                                    | 17.02758922 | 15.25593698 | 18.98460413 |      |                |             |
| 6.365158766                                     | 6.932303543                                            | 5.99653468  |             |             |      |                |             |
| ENSG0000010292                                  | 4131.510144                                            | 4339.05829  | 6325.377954 |             |      |                |             |
| 1775.089718                                     | 1833.202914                                            | 1523.827702 | 4931.982129 |             |      |                |             |
| 1710.706778                                     | 1.527628869                                            | 7.02E-19    | 1.65E-16    |             |      | NCAPD2         |             |
|                                                 | 12                                                     | 6493356     | 6531955     | +           | 6487 | protein_coding | non-        |
| SMC condensin I complex subunit D2 [Source:HGNC |                                                        |             |             |             |      |                |             |
| Symbol;Acc:HGNC:24305]                          | -                                                      | 3571        | 4681        | 6469        | 1767 | 2006           |             |
|                                                 | 1553                                                   | 30.10514096 | 31.81476365 | 46.19507845 |      |                |             |
| 13.17024543                                     | 13.47552296                                            | 11.17567063 |             |             |      |                |             |
| ENSG00000114251                                 | 4903.203582                                            | 2763.241351 | 4437.249213 |             |      |                |             |
| 1387.322525                                     | 1195.32872                                             | 1029.29508  | 4034.564715 |             |      |                |             |
| 1203.982108                                     | 1.7444207                                              | 8.04E-19    | 1.86E-16    |             |      | WNT5A          |             |
|                                                 | 3                                                      | 55465715    | 55490539    | -           | 7397 |                |             |
| protein_coding                                  | Wnt family member 5A [Source:HGNC                      |             |             |             |      |                |             |
| Symbol;Acc:HGNC:12784]                          | -                                                      | 4238        | 2981        | 4538        | 1381 | 1308           |             |
|                                                 | 1049                                                   | 31.33286059 | 17.76807241 | 28.41916599 |      |                |             |
| 9.026913406                                     | 7.705675622                                            | 6.620120664 |             |             |      |                |             |
| ENSG00000142945                                 | 1914.771573                                            | 2246.002614 | 3531.807879 |             |      |                |             |
| 632.8842799                                     | 609.5445382                                            | 826.1834674 | 2564.194022 |             |      |                |             |
| 689.5374285                                     | 1.895152339                                            | 8.36E-19    | 1.90E-16    |             |      | KIF2C          |             |
|                                                 | 1                                                      | 44739818    | 44767767    | +           | 3646 |                |             |
| protein_coding                                  | kinesin family member 2C [Source:HGNC                  |             |             |             |      |                |             |
| Symbol;Acc:HGNC:6393]                           | -                                                      | 1655        | 2423        | 3612        | 630  | 667            |             |

|                        |                                                    |                |                  |        |
|------------------------|----------------------------------------------------|----------------|------------------|--------|
| 842                    | 24.82424487                                        | 29.3002083     | 45.89163525      |        |
| 8.354589227            | 7.972008762                                        | 10.78056352    |                  |        |
| ENSG00000184661        | 881.6047969                                        | 748.9765218    | 1317.094467      |        |
| 158.7233591            | 263.1916447                                        | 209.9801212    | 982.5585951      |        |
| 210.6317083            | 2.220796626                                        | 8.46E-19       | 1.90E-16         | CDCA2  |
| 8                      | 25458997                                           | 25507920       | + 3908           |        |
| protein_coding         | cell division cycle associated 2                   | [Source:HGNC   |                  |        |
| Symbol;Acc:HGNC:14623] | -                                                  | 762 808        | 1347 158         | 288    |
| 214                    | 10.66338597                                        | 9.115715526    | 15.96671217      |        |
| 1.954806383            | 3.211415731                                        | 2.556261353    |                  |        |
| ENSG00000144554        | 1317.779349                                        | 1036.331375    | 1456.91964       |        |
| 418.9091186            | 435.9111615                                        | 385.6176992    | 1270.343455      |        |
| 413.4793264            | 1.618914586                                        | 9.78E-19       | 2.17E-16         | FANCD2 |
| 3                      | 10026414                                           | 10101930       | + 8378           |        |
| protein_coding         | FA complementation group D2                        | [Source:HGNC   |                  |        |
| Symbol;Acc:HGNC:3585]  | -                                                  | 1139 1118      | 1490 417         | 477    |
| 393                    | 7.434950489                                        | 5.883495227    | 8.238504214      |        |
| 2.406561228            | 2.481056308                                        | 2.189768631    |                  |        |
| ENSG00000178999        | 1023.911083                                        | 1588.794255    | 2199.068638      |        |
| 363.6573164            | 379.2518491                                        | 431.7348286    | 1603.924659      |        |
| 391.547998             | 2.034859302                                        | 3.16E-18       | 6.90E-16         | AURKB  |
| 17                     | 8204733 8210600                                    | - 2241         | protein_coding   | aurora |
| kinase B               | [Source:HGNC Symbol;Acc:HGNC:11390]                |                | - 885            | 1714   |
| 2249                   | 362 415                                            | 440 21.5971342 | 33.72119208      |        |
| 46.48898397            | 7.810303861                                        | 8.069838399    | 9.165514647      |        |
| ENSG00000101255        | 2930.583925                                        | 3885.779182    | 2618.544158      |        |
| 8478.640194            | 8116.903431                                        | 7363.041258    | 3144.969088      |        |
| 7986.194961            | -1.344251409                                       | 6.55E-18       | 1.41E-15         | TRIB3  |
| 20                     | 362835 397559                                      | + 3434         | protein_coding   |        |
| tribbles               | pseudokinase 3 [Source:HGNC Symbol;Acc:HGNC:16228] |                | -                |        |
| 2533                   | 4192 2678                                          | 8440 8882      | 7504 40.33941648 |        |
| 53.82139389            | 36.12540608                                        | 118.8347269    | 112.7117196      |        |
| 102.0090188            |                                                    |                |                  |        |
| ENSG00000121621        | 743.9263575                                        | 623.8381178    | 892.729954       |        |
| 185.8469711            | 228.4649694                                        | 212.9237677    | 753.4981431      |        |
| 209.0785694            | 1.848847348                                        | 9.40E-18       | 2.00E-15         | KIF18A |
| 11                     | 28020620                                           | 28108308       | - 4668           |        |
| protein_coding         | kinesin family member 18A                          | [Source:HGNC   |                  |        |
| Symbol;Acc:HGNC:29441] | -                                                  | 643 673        | 913 185          | 250    |
| 217                    | 7.533119179                                        | 6.356501808    | 9.060295993      |        |
| 1.916205567            | 2.333822159                                        | 2.170075892    |                  |        |
| ENSG00000163808        | 1064.404742                                        | 950.1249194    | 1543.943699      |        |
| 349.5932213            | 248.5698867                                        | 348.3315094    | 1186.157787      |        |
| 315.4982058            | 1.911382501                                        | 1.06E-17       | 2.22E-15         | KIF15  |
| 3                      | 44761717                                           | 44873376       | + 5285           |        |
| protein_coding         | kinesin family member 15                           | [Source:HGNC   |                  |        |
| Symbol;Acc:HGNC:17273] | -                                                  | 920 1025       | 1579 348         | 272    |
| 355                    | 9.520013154                                        | 8.550919772    | 13.84011167      |        |
| 3.183724421            | 2.242758494                                        | 3.135663114    |                  |        |
| ENSG00000182481        | 7996.919103                                        | 7446.198514    | 9730.072039      |        |

|                       |                                                      |              |                 |       |
|-----------------------|------------------------------------------------------|--------------|-----------------|-------|
| 3890.731454           | 3789.776912                                          | 3469.578077  | 8391.063219     |       |
| 3716.695481           | 1.174842108                                          | 1.29E-17     | 2.66E-15        | KPNA2 |
| 17                    | 68035519                                             | 68046842     | + 3140          |       |
| protein_coding        | karyopherin subunit alpha 2 [Source:HGNC             |              |                 |       |
| Symbol;Acc:HGNC:6395] | -                                                    | 6912 8033    | 9951 3873       | 4147  |
| 3536                  | 120.3840068                                          | 112.7929815  | 146.804556      |       |
| 59.63744999           | 57.55233985                                          | 52.56887029  |                 |       |
| ENSG00000157168       | 883.9187202                                          | 1264.361356  | 1424.652292     |       |
| 201.9202226           | 288.7797213                                          | 373.8431129  | 1190.977456     |       |
| 288.1810189           | 2.047312956                                          | 1.97E-17     | 4.02E-15        | NRG1  |
| 8                     | 31639386                                             | 32767959     | + 11328         |       |
| protein_coding        | neuregulin 1 [Source:HGNC Symbol;Acc:HGNC:7997]      |              |                 |       |
| 764                   | 1364 1457                                            | 201 316      | 381 3.688372973 |       |
| 5.308784397           | 5.958113433                                          | 0.85791455   | 1.215604894     |       |
| 1.570065502           |                                                      |              |                 |       |
| ENSG00000228716       | 2009.642431                                          | 1856.683135  | 2437.651451     |       |
| 822.7495638           | 880.9609218                                          | 806.559157   | 2101.325672     |       |
| 836.7565476           | 1.328318397                                          | 2.57E-17     | 5.16E-15        | DHFR  |
| 5                     | 80626228                                             | 80654983     | - 4409          |       |
| protein_coding        | dihydrofolate reductase [Source:HGNC                 |              |                 |       |
| Symbol;Acc:HGNC:2861] | -                                                    | 1737 2003    | 2493 819        | 964   |
| 822                   | 21.5453936                                           | 20.02971678  | 26.19296336     |       |
| 8.98142028            | 9.527863636                                          | 8.703175768  |                 |       |
| ENSG00000210082       | 103074.8727                                          | 107162.9675  | 85848.74534     |       |
| 232863.241            | 199427.0717                                          | 198837.4377  | 98695.52849     |       |
| 210375.9168           | -1.09191336                                          | 3.93E-17     | 7.79E-15        | MT-   |
| RNR2 MT               | 1671 3229                                            | + 1559       | Mt_rRNA         |       |
| mitochondrially       | encoded 16S RNA [Source:HGNC Symbol;Acc:HGNC:7471]   |              |                 |       |
| -                     | 89091 115608                                         | 87798 231802 | 218225 202644   |       |
| 3125.233214           | 3269.45776                                           | 2608.801068  | 7189.062844     |       |
| 6099.81951            | 6067.833706                                          |              |                 |       |
| ENSG00000115163       | 315.8505375                                          | 367.9996029  | 605.2572196     |       |
| 35.16023777           | 78.59194946                                          | 61.81657773  | 429.7024533     |       |
| 58.52292165           | 2.873936416                                          | 4.99E-17     | 9.78E-15        | CENPA |
| 2                     | 26764289                                             | 26801067     | + 1983          |       |
| protein_coding        | centromere protein A [Source:HGNC                    |              |                 |       |
| Symbol;Acc:HGNC:1851] | -                                                    | 273 397      | 619 35          | 86    |
| 63                    | 7.528954032                                          | 8.826768786  | 14.46006984     |       |
| 0.853388029           | 1.88988046                                           | 1.483077585  |                 |       |
| ENSG00000163430       | 6440.805649                                          | 5737.827562  | 6673.47419      |       |
| 2477.289896           | 3204.90659                                           | 2777.821136  | 6284.0358       |       |
| 2820.005874           | 1.155798114                                          | 1.03E-16     | 2.00E-14        | FSTL1 |
| 3                     | 120392293                                            | 120451253    | - 8727          |       |
| protein_coding        | folliculin like 1 [Source:HGNC Symbol;Acc:HGNC:3972] |              |                 |       |
| -                     | 5567 6190                                            | 6825 2466    | 3507 2831       |       |
| 34.88598246           | 31.27228613                                          | 36.22764768  | 13.66247288     |       |
| 17.51174351           | 15.14331406                                          |              |                 |       |
| ENSG00000171848       | 3370.229361                                          | 2606.586608  | 3233.579362     |       |
| 785.5801696           | 1312.302784                                          | 1047.938175  | 3070.131777     |       |
| 1048.607043           | 1.549255851                                          | 1.06E-16     | 2.02E-14        | RRM2  |

|                                     |                                                    |          |             |             |       |
|-------------------------------------|----------------------------------------------------|----------|-------------|-------------|-------|
| 2                                   | 10120698                                           | 10131419 | +           | 5323        |       |
| protein_coding                      | ribonucleotide reductase regulatory subunit M2     |          |             |             |       |
| [Source:HGNC Symbol;Acc:HGNC:10452] | -                                                  |          | 2913        | 2812        | 3307  |
| 782                                 | 1436                                               | 1068     | 29.92807139 | 23.2912506  |       |
| 28.77929723                         | 7.103158463                                        |          | 11.75591863 | 9.366143823 |       |
| ENSG00000120437                     | 1272.657843                                        |          | 1322.759278 | 1469.631019 |       |
| 539.4585052                         | 442.3081807                                        |          | 558.3116306 | 1355.016047 |       |
| 513.3594388                         | 1.400907074                                        |          | 1.09E-16    | 2.06E-14    | ACAT2 |
| 6                                   | 159760328                                          |          | 159779055   | +           | 4299  |
| protein_coding                      | acetyl-CoA acetyltransferase 2                     |          |             |             |       |
| [Source:HGNC Symbol;Acc:HGNC:94]    | -                                                  | 1100     | 1427        | 1503        | 537   |
| 569                                 | 13.99329381                                        |          | 14.63492449 | 16.19548623 | 484   |
| 6.03959834                          | 4.906101335                                        |          | 6.178611055 |             |       |
| ENSG00000189403                     | 10129.19947                                        |          | 10526.45716 | 12961.6958  |       |
| 5543.262629                         | 4943.981937                                        |          | 5105.264348 | 11205.78414 |       |
| 5197.502971                         | 1.108434067                                        |          | 1.49E-16    | 2.77E-14    | HMGB1 |
| 13                                  | 30456704                                           |          | 30617597    | -           | 7723  |
| protein_coding                      | high mobility group box 1                          |          |             |             |       |
| [Source:HGNC Symbol;Acc:HGNC:4983]  | HMG                                                | 8755     | 11356       | 13256       | 5518  |
| 5203                                | 61.99616541                                        |          | 64.82959477 | 79.51131139 | 5410  |
| 34.54592913                         | 30.52599495                                        |          | 31.44950592 |             |       |
| ENSG00000117399                     | 2684.151088                                        |          | 3401.910687 | 5128.552693 |       |
| 1121.109296                         | 1069.216057                                        |          | 1326.603382 | 3738.204822 |       |
| 1172.309578                         | 1.673259778                                        |          | 1.63E-16    | 3.01E-14    | CDC20 |
| 1                                   | 43358955                                           |          | 43363203    | +           | 2038  |
| protein_coding                      | cell division cycle 20                             |          |             |             |       |
| [Source:HGNC Symbol;Acc:HGNC:1723]  | -                                                  | 2320     | 3670        | 5245        | 1116  |
| 1352                                | 62.2556136                                         |          | 79.39549168 | 119.2185317 | 1170  |
| 26.47654008                         | 25.01729097                                        |          | 30.96838431 |             |       |
| ENSG00000134222                     | 753.1820509                                        |          | 840.7446847 | 1314.161071 |       |
| 210.9614266                         | 293.3490207                                        |          | 168.7690693 | 969.3626023 |       |
| 224.3598389                         | 2.110613067                                        |          | 2.02E-16    | 3.68E-14    | PSRC1 |
| 1                                   | 109279556                                          |          | 109283186   | -           | 2855  |
| protein_coding                      | proline and serine rich coiled-coil 1              |          |             |             |       |
| [Source:HGNC Symbol;Acc:HGNC:24472] | -                                                  | 651      | 907         | 1344        | 210   |
| 172                                 | 12.47009002                                        |          | 14.0066776  | 21.80698435 | 321   |
| 3.556431094                         | 4.899564932                                        |          | 2.812343537 |             |       |
| ENSG00000181019                     | 1055.149048                                        |          | 995.5455253 | 1277.98253  |       |
| 289.3185279                         | 419.4616837                                        |          | 370.8994664 | 1109.559034 |       |
| 359.893226                          | 1.623677115                                        |          | 2.14E-16    | 3.84E-14    | NQ01  |
| 16                                  | 69706996                                           |          | 69726951    | -           | 3254  |
| protein_coding                      | NAD(P)H quinone dehydrogenase 1                    |          |             |             |       |
| [Source:HGNC Symbol;Acc:HGNC:2874]  | -                                                  | 912      | 1074        | 1307        | 288   |
| 378                                 | 15.32752392                                        |          | 14.55193314 | 18.60632038 | 459   |
| 4.279333718                         | 6.146865844                                        |          | 5.422758791 |             |       |
| ENSG00000163507                     | 2046.665204                                        |          | 1480.340972 | 2166.80129  |       |
| 702.2001772                         | 632.3910352                                        |          | 741.7989327 | 1897.935822 |       |
| 692.1300484                         | 1.455214082                                        |          | 2.44E-16    | 4.33E-14    | CIP2A |
| 3                                   | 108549869                                          |          | 108589644   | -           | 4579  |
| protein_coding                      | cell proliferation regulating inhibitor of protein |          |             |             |       |

|                                                                                                         |   |      |
|---------------------------------------------------------------------------------------------------------|---|------|
| phosphatase 2A [Source:HGNC Symbol;Acc:HGNC:29302]                                                      | - | 1769 |
| 1597 2216 699 692 756 21.12768446                                                                       |   |      |
| 15.37688019 22.41824279 7.380873273 6.585580286                                                         |   |      |
| 7.707209917                                                                                             |   |      |
| ENSG00000182628 1406.865398 1219.867701 1380.651364                                                     |   |      |
| 526.3989883 575.7317228 501.4011304 1335.794821                                                         |   |      |
| 534.5106139 1.320873178 2.71E-16 4.77E-14 SKA2                                                          |   |      |
| 17 59109951 59155269 - 3148                                                                             |   |      |
| protein_coding spindle and kinetochore associated complex subunit 2 [Source:HGNC Symbol;Acc:HGNC:28006] | - | 1412 |
| 524 630 511 21.1248466 18.43126416                                                                      |   |      |
| 20.77793718 8.048181832 8.72096259 7.577609351                                                          |   |      |
| ENSG00000113721 3783.26468 2847.593905 6232.487105                                                      |   |      |
| 1364.217226 1164.257484 1219.650891 4287.781896                                                         |   |      |
| 1249.3752 1.779112033 4.14E-16 7.19E-14 PDGFRB                                                          |   |      |
| 5 150113837 150155872 - 7137                                                                            |   |      |
| protein_coding platelet derived growth factor receptor beta [Source:HGNC Symbol;Acc:HGNC:8804]          | - | 6374 |
| 1358 1274 1243 25.05686705 18.97752065                                                                  |   |      |
| 41.37126669 9.199946243 7.778795047 8.130204465                                                         |   |      |
| ENSG00000119403 1404.551474 1499.806946 2227.424792                                                     |   |      |
| 586.6736817 581.214882 579.898372 1710.594404                                                           |   |      |
| 582.5956452 1.554219869 4.60E-16 7.90E-14 PHF19                                                         |   |      |
| 9 120855652 120894896 - 6733                                                                            |   |      |
| protein_coding PHD finger protein 19 [Source:HGNC Symbol;Acc:HGNC:24566]                                | - | 636  |
| 591 9.860632768 10.59507074 15.67283499                                                                 |   |      |
| 4.193778116 4.116300757 4.097556043                                                                     |   |      |
| ENSG00000237649 1559.584339 1629.580106 2505.119542                                                     |   |      |
| 565.577539 718.2938636 502.382346 1898.094662                                                           |   |      |
| 595.4179162 1.672397118 9.07E-16 1.54E-13 KIFC1                                                         |   |      |
| 6 33391536 33409924 + 3345                                                                              |   |      |
| protein_coding kinesin family member C1 [Source:HGNC Symbol;Acc:HGNC:6389]                              | - | 786  |
| 512 22.03882736 23.17163648 35.48015097                                                                 |   |      |
| 8.137921369 10.23964786 7.145290245                                                                     |   |      |
| ENSG00000134690 1362.900854 1436.774268 2295.870681                                                     |   |      |
| 466.124295 530.0387289 593.6353893 1698.515268                                                          |   |      |
| 529.9328044 1.680563934 1.06E-15 1.78E-13 CDCA8                                                         |   |      |
| 1 37692418 37709719 + 2469                                                                              |   |      |
| protein_coding cell division cycle associated 8 [Source:HGNC Symbol;Acc:HGNC:14629]                     | - | 580  |
| 605 26.09269353 27.67862847 44.05340263                                                                 |   |      |
| 9.086530886 10.23683024 11.43879615                                                                     |   |      |
| ENSG00000112029 998.4579261 894.5078509 1080.46725                                                      |   |      |
| 312.423827 379.2518491 386.5989147 991.1443423                                                          |   |      |
| 359.4248636 1.462913444 1.55E-15 2.57E-13 FBX05                                                         |   |      |
| 6 152970519 152983579 - 3833                                                                            |   |      |
| protein_coding F-box protein 5 [Source:HGNC Symbol;Acc:HGNC:13584]                                      | - |      |
| - 863 965 1105 311 415 394                                                                              |   |      |

|                 |                                                                                                        |             |             |             |
|-----------------|--------------------------------------------------------------------------------------------------------|-------------|-------------|-------------|
| 12.31307966     | 11.09998654                                                                                            | 13.35444718 | 3.923040451 |             |
| 4.718107971     | 4.798477231                                                                                            |             |             |             |
| ENSG00000171320 | 1175.473063                                                                                            | 818.4978574 | 1159.668922 |             |
| 216.988896      | 370.1132504                                                                                            | 311.0453197 | 1051.21328  |             |
| 299.3824887     | 1.810664075                                                                                            | 2.49E-15    | 4.10E-13    | ESC02       |
| 8               | 27771949                                                                                               | 27812640    | + 7973      |             |
| protein_coding  | establishment of sister chromatid cohesion N-acetyltransferase 2 [Source:HGNC Symbol;Acc:HGNC:27230] - |             |             | 1016        |
| 883             | 1186 216                                                                                               | 405 317     | 6.968938896 |             |
| 4.88284454      | 6.89073234                                                                                             | 1.309885105 | 2.213562847 |             |
| 1.85602377      |                                                                                                        |             |             |             |
| ENSG00000051341 | 931.354149                                                                                             | 888.9461441 | 927.9306969 |             |
| 360.6435817     | 266.8470842                                                                                            | 346.3690784 | 916.0769967 |             |
| 324.6199148     | 1.497432324                                                                                            | 2.57E-15    | 4.17E-13    | POLQ        |
| 3               | 121431427                                                                                              | 121546641   | - 9400      |             |
| protein_coding  | DNA polymerase theta [Source:HGNC Symbol;Acc:HGNC:9186] -                                              |             |             | 292         |
| 353             | 4.683416045                                                                                            | 4.498054483 | 4.67671403  |             |
| 1.846578656     | 1.353672467                                                                                            | 1.753044286 |             |             |
| ENSG00000265415 | 207.09614                                                                                              | 155.7277917 | 265.9611692 |             |
| 17.07782977     | 15.53561792                                                                                            | 31.39889662 | 209.5950336 |             |
| 21.3374481      | 3.29806785                                                                                             | 2.63E-15    | 4.23E-13    |             |
| AC099850.3      | 17 59202677                                                                                            | 59203829    | -           | 321         |
| antisense       | "novel transcript, antisense to PRR11" -                                                               |             |             |             |
| 179             | 168 272                                                                                                | 17 17       | 32          | 30.49598823 |
| 23.07481391     | 39.25241008                                                                                            | 2.560619836 | 2.307822944 |             |
| 4.653620691     |                                                                                                        |             |             |             |
| ENSG00000117525 | 1138.450289                                                                                            | 652.5736032 | 835.0398474 |             |
| 252.1491337     | 241.2590076                                                                                            | 265.9094058 | 875.3545798 |             |
| 253.105849      | 1.789249723                                                                                            | 2.75E-15    | 4.38E-13    | F3          |
| 1               | 94529225                                                                                               | 94541800    | - 2875      |             |
| protein_coding  | "coagulation factor III, tissue factor [Source:HGNC Symbol;Acc:HGNC:3541]" -                           |             |             | 264         |
| 271             | 18.71767758                                                                                            | 10.79614647 | 13.76012812 |             |
| 4.22121127      | 4.001517086                                                                                            | 4.400251277 |             |             |
| ENSG00000177000 | 345.931541                                                                                             | 359.6570426 | 294.3173233 |             |
| 1178.370254     | 899.2381194                                                                                            | 860.5260106 | 333.301969  |             |
| 979.3781281     | -1.554981226                                                                                           | 3.47E-15    | 5.47E-13    | MTHFR       |
| 1               | 11785723                                                                                               | 11806920    | - 11978     |             |
| protein_coding  | methylenetetrahydrofolate reductase [Source:HGNC Symbol;Acc:HGNC:7436] -                               |             |             | 984         |
| 877             | 1.365153831                                                                                            | 1.42817483  | 1.164084865 |             |
| 4.734944794     | 3.57988757                                                                                             | 3.417915491 |             |             |
| ENSG00000035499 | 554.1846427                                                                                            | 537.6316617 | 607.2128164 |             |
| 138.6317946     | 137.9928415                                                                                            | 199.1867505 | 566.3430403 |             |
| 158.6037955     | 1.836706714                                                                                            | 3.89E-15    | 6.07E-13    |             |
| DEPDC1B 5       | 60596912                                                                                               | 60700190    | - 3806      |             |
| protein_coding  | DEP domain containing 1B [Source:HGNC Symbol;Acc:HGNC:24902] -                                         |             |             | 151         |
| 203             | 6.882741238                                                                                            | 6.718822495 | 7.55831995  |             |



|                       |                                                         |             |             |             |      |             |
|-----------------------|---------------------------------------------------------|-------------|-------------|-------------|------|-------------|
| 1.753119494           | 1.728887607                                             | 2.489850607 |             |             |      |             |
| ENSG00000154734       | 3185.115493                                             | 3651.260544 | 2403.428507 |             |      |             |
| 7286.205844           | 6697.679042                                             | 8454.152916 | 3079.934848 |             |      |             |
| 7479.345934           | -1.279963574                                            | 4.18E-15    | 6.46E-13    |             |      |             |
| ADAMTS1 21            | 26835747                                                | 26845409    | -           | 7063        |      |             |
| protein_coding        | ADAM metalloproteinase with thrombospondin type 1 motif |             |             |             |      |             |
| 1 [Source:HGNC        | Symbol;Acc:HGNC:217]                                    | -           | 2753        | 3939        | 2458 |             |
| 7253                  | 7329                                                    | 8616        | 21.3162948  | 24.58842621 |      |             |
| 16.12111693           | 49.65119296                                             | 45.21828775 | 56.9459077  |             |      |             |
| ENSG00000188641       | 2123.024675                                             | 1847.413624 | 2131.600547 |             |      |             |
| 941.289794            | 884.6163613                                             | 958.6475625 | 2034.012949 |             |      |             |
| 928.1845726           | 1.131763179                                             | 4.42E-15    | 6.75E-13    |             |      | DPYD        |
| 1                     | 97077743                                                | 97995000    | -           | 7131        |      |             |
| protein_coding        | dihydropyrimidine dehydrogenase [Source:HGNC            |             |             |             |      |             |
| Symbol;Acc:HGNC:3012] | -                                                       | 1835        | 1993        | 2180        | 937  | 968         |
| 977                   | 14.07279447                                             | 12.32227283 | 14.16147575 |             |      |             |
| 6.353168456           | 5.915391849                                             | 6.395730614 |             |             |      |             |
| ENSG00000164611       | 1360.586931                                             | 1218.94075  | 1717.991817 |             |      |             |
| 515.3486279           | 506.2783721                                             | 592.6541738 | 1432.506499 |             |      |             |
| 538.0937246           | 1.412744402                                             | 4.51E-15    | 6.83E-13    |             |      | PTTG1       |
| 5                     | 160421822                                               | 160428744   | +           | 2013        |      |             |
| protein_coding        | pituitary tumor-transforming 1 [Source:HGNC             |             |             |             |      |             |
| Symbol;Acc:HGNC:9690] | -                                                       | 1176        | 1315        | 1757        | 513  | 554         |
| 604                   | 31.94907285                                             | 28.80155499 | 40.43248577 |             |      |             |
| 12.32181848           | 11.99291036                                             | 14.00680877 |             |             |      |             |
| ENSG00000130766       | 373.6986213                                             | 559.8784891 | 412.6309316 |             |      |             |
| 1287.869281           | 1249.246452                                             | 1202.970227 | 448.736014  |             |      |             |
| 1246.69532            | -1.472431389                                            | 5.12E-15    | 7.67E-13    |             |      | SESN2       |
| 1                     | 28259527                                                | 28282491    | +           | 3453        |      |             |
| protein_coding        | sestrin 2 [Source:HGNC Symbol;Acc:HGNC:20746]           |             |             |             |      | -           |
| 323                   | 604                                                     | 422         | 1282        | 1367        | 1226 | 5.115648036 |
| 7.712129584           | 5.661328145                                             | 17.95116601 | 17.25164584 |             |      |             |
| 16.5744806            |                                                         |             |             |             |      |             |
| ENSG00000116962       | 655.9972701                                             | 746.1956684 | 1541.010304 |             |      |             |
| 236.0758822           | 128.8542427                                             | 210.9613367 | 981.0677475 |             |      |             |
| 191.9638205           | 2.354887864                                             | 8.29E-15    | 1.23E-12    |             |      | NID1        |
| 1                     | 235975830                                               | 236065162   | -           | 5864        |      |             |
| protein_coding        | nidogen 1 [Source:HGNC Symbol;Acc:HGNC:7821]            |             |             |             |      | -           |
| 567                   | 805                                                     | 1576        | 235         | 141         | 215  | 5.287907019 |
| 6.052515032           | 12.44986687                                             | 1.937649038 | 1.047812919 |             |      |             |
| 1.711553717           |                                                         |             |             |             |      |             |
| ENSG00000185697       | 1138.450289                                             | 945.4901637 | 1371.851178 |             |      |             |
| 456.0785128           | 396.6151868                                             | 387.5801302 | 1151.930543 |             |      |             |
| 413.4246099           | 1.478463712                                             | 9.55E-15    | 1.40E-12    |             |      | MYBL1       |
| 8                     | 66562175                                                | 66614247    | -           | 7239        |      |             |
| protein_coding        | MYB proto-oncogene like 1 [Source:HGNC                  |             |             |             |      |             |
| Symbol;Acc:HGNC:7547] | MYB                                                     | 984         | 1020        | 1403        | 454  | 434         |
| 395                   | 7.433806195                                             | 6.212344814 | 8.978040294 |             |      |             |
| 3.032344175           | 2.612580919                                             | 2.547208849 |             |             |      |             |
| ENSG00000167900       | 2543.001763                                             | 3001.467794 | 3875.992922 |             |      |             |

|                                   |                                                        |             |             |       |
|-----------------------------------|--------------------------------------------------------|-------------|-------------|-------|
| 974.4408754                       | 1320.527523                                            | 1287.354762 | 3140.15416  |       |
| 1194.10772                        | 1.394917394                                            | 1.36E-14    | 1.98E-12    | TK1   |
| 17                                | 78174075                                               | 78187233    | - 1861      |       |
| protein_coding                    | thymidine kinase 1 [Source:HGNC Symbol;Acc:HGNC:11830] |             |             |       |
| -                                 | 2198 3238                                              | 3964 970    | 1445 1312   |       |
| 64.59159778                       | 76.71219848                                            | 98.67104517 | 25.20151084 |       |
| 33.83608223                       | 32.91042553                                            |             |             |       |
| ENSG00000171604                   | 1420.748938                                            | 1209.671239 | 1658.346114 |       |
| 581.6507906                       | 572.9901431                                            | 441.5469838 | 1429.588763 |       |
| 532.0626392                       | 1.425729851                                            | 1.39E-14    | 2.01E-12    | CXXC5 |
| 5                                 | 139647299                                              | 139683882   | + 3852      |       |
| protein_coding                    | CXXC finger protein 5 [Source:HGNC                     |             |             |       |
| Symbol;Acc:HGNC:26943]            | -                                                      | 1228 1305   | 1696 579    | 627   |
| 450                               | 17.43439178                                            | 14.9368215  | 20.39586014 |       |
| 7.267641593                       | 7.093161695                                            | 5.453461747 |             |       |
| ENSG00000142731                   | 1011.184505                                            | 685.9438442 | 920.1083096 |       |
| 318.4512964                       | 264.1055046                                            | 283.5712851 | 872.4122195 |       |
| 288.709362                        | 1.595091524                                            | 1.64E-14    | 2.34E-12    | PLK4  |
| 4                                 | 127880861                                              | 127899195   | + 4482      |       |
| protein_coding                    | polo like kinase 4 [Source:HGNC Symbol;Acc:HGNC:11397] |             |             |       |
| -                                 | 874 740                                                | 941 317     | 289 289     |       |
| 10.66434762                       | 7.279370519                                            | 9.72568562  | 3.419704867 |       |
| 2.809859394                       | 3.010038333                                            |             |             |       |
| ENSG00000120802                   | 4906.674467                                            | 4225.970251 | 5442.425984 |       |
| 2157.834021                       | 2388.82972                                             | 2409.865316 | 4858.356901 |       |
| 2318.843019                       | 1.066949112                                            | 1.73E-14    | 2.45E-12    | TMPO  |
| 12                                | 98515512                                               | 98550379    | + 8593      |       |
| protein_coding                    | thymopoietin [Source:HGNC Symbol;Acc:HGNC:11875]       |             |             |       |
| -                                 | 4241 4559                                              | 5566 2148   | 2614 2456   |       |
| 26.99095017                       | 23.39153588                                            | 30.00549848 | 12.08622519 |       |
| 13.25620981                       | 13.34226575                                            |             |             |       |
| ENSG00000136108                   | 4082.917754                                            | 3158.122537 | 4467.560963 |       |
| 1591.251904                       | 1859.704851                                            | 1640.592349 | 3902.867085 |       |
| 1697.183034                       | 1.201140709                                            | 1.91E-14    | 2.69E-12    | CKAP2 |
| 13                                | 52455429                                               | 52476628    | + 4547      |       |
| protein_coding                    | cytoskeleton associated protein 2 [Source:HGNC         |             |             |       |
| Symbol;Acc:HGNC:1990]             | -                                                      | 3529 3407   | 4569 1584   | 2035  |
| 1672                              | 42.44449951                                            | 33.03551924 | 46.54774641 |       |
| 16.84346504                       | 19.50284895                                            | 17.16553544 |             |       |
| ENSG00000170017                   | 4349.018939                                            | 3147.926074 | 3964.972578 |       |
| 1461.661313                       | 1473.142122                                            | 1880.008935 | 3820.639197 |       |
| 1604.937457                       | 1.251127703                                            | 1.95E-14    | 2.71E-12    | ALCAM |
| 3                                 | 105366909                                              | 105576900   | + 7179      |       |
| protein_coding                    | activated leukocyte cell adhesion molecule             |             |             |       |
| [Source:HGNC Symbol;Acc:HGNC:400] | -                                                      |             | 3759 3396   | 4055  |
| 1455                              | 1612 1916                                              | 28.63538886 | 20.85632022 |       |
| 26.16551945                       | 9.799417398                                            | 9.784974132 | 12.45883939 |       |
| ENSG00000140525                   | 2569.611882                                            | 2235.806152 | 2365.294369 |       |
| 1231.6129                         | 1028.092362                                            | 1006.727123 | 2390.237467 |       |
| 1088.810795                       | 1.134372596                                            | 2.02E-14    | 2.78E-12    | FANCI |

|                        |                                                      |             |             |             |             |
|------------------------|------------------------------------------------------|-------------|-------------|-------------|-------------|
| 15                     | 89243949                                             | 89317261    | +           | 7766        |             |
| protein_coding         | FA complementation group I [Source:HGNC              |             |             |             |             |
| Symbol;Acc:HGNC:25568] | -                                                    | 2221        | 2412        | 2419        | 1226 1125   |
| 1026                   | 15.64032903                                          | 13.69348137 |             | 14.4291563  |             |
| 7.632983094            | 6.312679407                                          | 6.167313289 |             |             |             |
| ENSG00000161888        | 529.8884475                                          | 469.0372773 |             | 625.7909863 |             |
| 89.40746176            | 175.4610965                                          | 119.7082934 |             | 541.572237  |             |
| 128.1922839            | 2.076675214                                          | 2.86E-14    |             | 3.90E-12    | SPC24       |
| 19                     | 11131520                                             | 11155808    | -           | 2839        |             |
| protein_coding         | "SPC24, NDC80 kinetochore complex component          |             |             |             |             |
| [Source:HGNC           | Symbol;Acc:HGNC:26913]"                              | -           | 458         | 506         | 640         |
| 89                     | 192                                                  | 122         | 8.822563609 | 7.858127703 |             |
| 10.44280185            | 1.515743905                                          | 2.947097024 | 2.00604409  |             |             |
| ENSG00000152234        | 8449.291118                                          | 7119.911713 | 8072.703724 |             |             |
| 4044.431922            | 4290.572124                                          | 3943.505173 | 7880.635518 |             |             |
| 4092.836406            | 0.945075576                                          | 2.90E-14    | 3.92E-12    |             |             |
| ATP5F1A                | 18                                                   | 46080248    | 46104334    | -           | 10908       |
| protein_coding         | ATP synthase F1 subunit alpha [Source:HGNC           |             |             |             |             |
| Symbol;Acc:HGNC:823]   | -                                                    | 7303        | 7681        | 8256        | 4026 4695   |
| 4019                   | 36.61431252                                          | 31.04606724 | 35.06121895 |             |             |
| 17.84554673            | 18.75638182                                          | 17.19962241 |             |             |             |
| ENSG00000143401        | 3917.472234                                          | 3397.275931 | 4388.359292 |             |             |
| 1854.451398            | 1938.2968                                            | 1617.043176 | 3901.035819 |             |             |
| 1803.263791            | 1.11311265                                           | 3.00E-14    | 4.02E-12    |             | ANP32E      |
| 1                      | 150218417                                            | 150236156   | -           | 3605        |             |
| protein_coding         | acidic nuclear phosphoprotein 32 family member E     |             |             |             |             |
| [Source:HGNC           | Symbol;Acc:HGNC:16673]                               | -           | 3386        | 3665        | 4488        |
| 1846                   | 2121                                                 | 1648        | 51.36607688 | 44.82318035 |             |
| 57.6700111             | 24.75868897                                          | 25.63858172 | 21.34017488 |             |             |
| ENSG00000095752        | 654.8403085                                          | 1256.018796 | 1041.355313 |             |             |
| 233.0621475            | 289.6935811                                          | 311.0453197 | 984.0714725 |             |             |
| 277.9336828            | 1.824645404                                          | 3.52E-14    | 4.68E-12    |             | IL11        |
| 19                     | 55364389                                             | 55370463    | -           | 2671        |             |
| protein_coding         | interleukin 11 [Source:HGNC                          |             |             |             |             |
| Symbol;Acc:HGNC:5966]  | -                                                    | 566         | 1355        | 1065        | 232 317 317 |
| 11.58876766            | 22.3665688                                           | 18.47047974 | 4.199671426 |             |             |
| 5.171826796            | 5.540276121                                          |             |             |             |             |
| ENSG00000136824        | 2554.57138                                           | 2047.63507  | 2581.387819 |             |             |
| 1166.315316            | 958.6390114                                          | 1042.050882 | 2394.531423 |             |             |
| 1055.668403            | 1.18158336                                           | 3.69E-14    | 4.87E-12    |             | SMC2        |
| 9                      | 104094260                                            | 104141417   | +           | 6468        |             |
| protein_coding         | structural maintenance of chromosomes 2 [Source:HGNC |             |             |             |             |
| Symbol;Acc:HGNC:14011] | -                                                    | 2208        | 2209        | 2640        | 1161 1049   |
| 1062                   | 18.6691167                                           | 15.05773545 | 18.9075985  |             |             |
| 8.678874833            | 7.067471644                                          | 7.664794956 |             |             |             |
| ENSG00000198826        | 1721.558973                                          | 1516.492066 | 2323.249037 |             |             |
| 687.1315039            | 784.0917748                                          | 620.1282083 | 1853.766692 |             |             |
| 697.1171623            | 1.410786819                                          | 4.39E-14    | 5.73E-12    |             |             |
| ARHGAP11A              | 15                                                   | 32615144    | 32639949    | +           | 6428        |
| protein_coding         | Rho GTPase activating protein 11A [Source:HGNC       |             |             |             |             |

|                                                |                                                     |             |          |             |      |                        |
|------------------------------------------------|-----------------------------------------------------|-------------|----------|-------------|------|------------------------|
| Symbol;Acc:HGNC:15783]                         | -                                                   | 1488        | 1636     | 2376        | 684  | 858                    |
| 632                                            | 12.65965224                                         | 11.2212539  |          | 17.12273061 |      |                        |
| 5.144953454                                    | 5.816610963                                         | 4.589731141 |          |             |      |                        |
| ENSG00000168268                                | 9789.052738                                         | 8499.21501  |          | 12451.28503 |      |                        |
| 4812.934262                                    | 4307.935462                                         | 4871.735054 |          | 10246.51759 |      |                        |
| 4664.201593                                    | 1.135466314                                         | 5.60E-14    |          | 7.26E-12    |      | NT5DC2                 |
| 3                                              | 52524385                                            | 52535054    |          | -           | 4719 |                        |
| protein_coding                                 | 5'-nucleotidase domain containing 2 [Source:HGNC    |             |          |             |      |                        |
| Symbol;Acc:HGNC:25717]                         | -                                                   | 8461        | 9169     | 12734       | 4791 | 4714                   |
| 4965                                           | 98.05425186                                         | 85.66549986 |          | 125.0021043 |      |                        |
| 49.08823421                                    | 43.53095536                                         | 49.11513152 |          |             |      |                        |
| ENSG00000105894                                | 695.3339671                                         | 447.717401  |          | 665.8807214 |      |                        |
| 139.6363729                                    | 187.3412749                                         | 92.23425883 |          | 602.9773632 |      |                        |
| 139.7373022                                    | 2.107472441                                         | 7.85E-14    |          | 1.01E-11    |      | PTN                    |
| 7                                              | 137227341                                           | 137343865   |          | -           | 1713 |                        |
| protein_coding                                 | pleiotrophin [Source:HGNC                           |             |          |             |      |                        |
| Symbol;Acc:HGNC:9630]                          | -                                                   | 601         | 483      | 681         | 139  | 205                    |
| 94                                             | 12.43150548                                         | 18.41586848 |          | 3.923364461 |      | 5.215009403            |
| 2.561630741                                    |                                                     |             |          |             |      |                        |
| ENSG00000132205                                | 186.2708298                                         | 275.3044888 |          | 293.3395248 |      |                        |
| 41.1877071                                     | 22.84649694                                         | 47.09834493 |          | 251.6382812 |      |                        |
| 37.04418299                                    | 2.768521659                                         | 8.58E-14    |          | 1.09E-11    |      |                        |
| EMILIN2                                        | 18                                                  | 2847030     | 2915993  | +           | 6435 | protein_coding         |
| elastin microfibril interfacier 2 [Source:HGNC |                                                     |             |          |             |      | Symbol;Acc:HGNC:19881] |
| -                                              | 161                                                 | 297         | 300      | 41          | 25   | 48                     |
| 1.368270733                                    | 2.034894304                                         | 2.159609152 |          | 0.308060859 |      |                        |
| 0.169297309                                    | 0.348207982                                         |             |          |             |      |                        |
| ENSG00000135451                                | 404.9365865                                         | 531.1430037 |          | 807.6614917 |      |                        |
| 131.5997471                                    | 99.61072664                                         | 160.9193452 |          | 581.2470273 |      |                        |
| 130.7099396                                    | 2.154449526                                         | 9.03E-14    |          | 1.14E-11    |      | TROAP                  |
| 12                                             | 49323236                                            | 49331731    |          | +           | 3954 |                        |
| protein_coding                                 | trophinin associated protein [Source:HGNC           |             |          |             |      |                        |
| Symbol;Acc:HGNC:12327]                         | -                                                   | 350         | 573      | 826         | 131  | 109                    |
| 164                                            | 4.840899785                                         | 6.389279914 |          | 9.677113575 |      |                        |
| 1.601901644                                    | 1.201291573                                         | 1.936213389 |          |             |      |                        |
| ENSG00000129195                                | 598.1491863                                         | 899.1426066 |          | 1401.18513  |      |                        |
| 270.2315417                                    | 223.89567                                           | 247.2663109 |          | 966.1589744 |      |                        |
| 247.1311742                                    | 1.967956095                                         | 1.09E-13    |          | 1.36E-11    |      | PIMREG                 |
| 17                                             | 6444415                                             | 6451469     | +        | 2823        |      | protein_coding         |
| interacting mitotic regulator [Source:HGNC     |                                                     |             |          |             |      | PICALM                 |
| Symbol;Acc:HGNC:25483]                         | -                                                   | 517         | 970      | 1433        | 269  | 245                    |
| 252                                            | 10.01554018                                         | 15.14937842 |          | 23.51460934 |      | 4.607258907            |
| 3.781932767                                    | 4.16711704                                          |             |          |             |      |                        |
| ENSG00000104341                                | 4235.636695                                         | 4007.209782 |          | 4509.606295 |      |                        |
| 2221.122449                                    | 2316.634789                                         | 2166.523867 |          | 4250.817591 |      |                        |
| 2234.760368                                    | 0.927547308                                         | 1.11E-13    |          | 1.38E-11    |      |                        |
| LAPTM4B                                        | 8                                                   | 97775057    | 97853013 | +           | 3197 |                        |
| protein_coding                                 | lysosomal protein transmembrane 4 beta [Source:HGNC |             |          |             |      |                        |
| Symbol;Acc:HGNC:13646]                         | -                                                   | 3661        | 4323     | 4612        | 2211 | 2535                   |
| 2208                                           | 62.62558639                                         | 59.61788394 |          | 66.82656191 |      |                        |

|                                      |                                                                                 |             |             |             |                |           |
|--------------------------------------|---------------------------------------------------------------------------------|-------------|-------------|-------------|----------------|-----------|
| 33.43854122                          | 34.55364962                                                                     | 32.24055198 |             |             |                |           |
| ENSG00000182010                      | 533.3593325                                                                     | 428.2514271 | 491.8326033 |             |                |           |
| 139.6363729                          | 116.0602044                                                                     | 163.8629918 | 484.481121  |             |                |           |
| 139.8531897                          | 1.792816888                                                                     | 1.21E-13    | 1.49E-11    |             |                | RTKN2     |
| 10                                   | 62183035                                                                        | 62268707    | -           | 9548        |                |           |
| protein_coding                       | rhotekin 2 [Source:HGNC Symbol;Acc:HGNC:19364]                                  |             |             |             |                | -         |
| 461                                  | 462                                                                             | 503         | 139         | 127         | 167            | 2.6404821 |
|                                      | 2.133356931                                                                     | 2.440383222 | 0.703888073 | 0.579628736 |                |           |
|                                      | 0.816488546                                                                     |             |             |             |                |           |
| ENSG00000162063                      | 900.1161837                                                                     | 723.948841  | 1258.426562 |             |                |           |
| 273.2452764                          | 332.6449954                                                                     | 309.0828886 | 960.8305288 |             |                |           |
| 304.9910535                          | 1.655134509                                                                     | 1.51E-13    | 1.85E-11    |             |                | CCNF      |
| 16                                   | 2429394                                                                         | 2458854     | +           | 6309        | protein_coding | cyclin    |
| F [Source:HGNC Symbol;Acc:HGNC:1591] |                                                                                 |             | -           | 778         | 781            | 1287      |
| 272                                  | 364                                                                             | 315         | 6.743941313 | 5.457886053 |                |           |
| 9.449753399                          | 2.084536928                                                                     | 2.514197869 | 2.330751982 |             |                |           |
| ENSG00000169607                      | 807.5592496                                                                     | 634.9615315 | 1127.401574 |             |                |           |
| 206.9431137                          | 306.1430589                                                                     | 197.2243194 | 856.640785  |             |                |           |
| 236.770164                           | 1.854189988                                                                     | 1.97E-13    | 2.39E-11    |             |                | CKAP2L    |
| 2                                    | 112736607                                                                       | 112764677   | -           | 5219        |                |           |
| protein_coding                       | cytoskeleton associated protein 2 like [Source:HGNC Symbol;Acc:HGNC:26877]      |             |             |             |                | -         |
| 201                                  | 7.314132751                                                                     | 5.786783475 | 1153        | 206         |                | 335       |
| 1.908451555                          | 2.797152264                                                                     | 1.797855555 | 10.2339777  |             |                |           |
| ENSG00000168615                      | 5340.535095                                                                     | 4316.811463 | 5725.009727 |             |                |           |
| 2471.262426                          | 2214.282483                                                                     | 2629.657592 | 5127.452095 |             |                |           |
| 2438.400834                          | 1.072294534                                                                     | 2.06E-13    | 2.48E-11    |             |                | ADAM9     |
| 8                                    | 38996869                                                                        | 39105144    | +           | 6913        |                |           |
| protein_coding                       | ADAM metalloproteinase domain 9 [Source:HGNC Symbol;Acc:HGNC:216]               |             |             |             |                | -         |
| 2680                                 | 36.51690452                                                                     | 29.70117557 | 5855        | 2460        |                | 2423      |
| 17.20559781                          | 15.27374216                                                                     | 18.0973203  | 39.23401902 |             |                |           |
| ENSG00000184445                      | 1727.343782                                                                     | 1543.37365  | 1738.525584 |             |                |           |
| 830.7861896                          | 776.7808958                                                                     | 732.967993  | 1669.747672 |             |                |           |
| 780.1783595                          | 1.097639046                                                                     | 2.17E-13    | 2.60E-11    |             |                | KNTC1     |
| 12                                   | 122527246                                                                       | 122626396   | +           | 11325       |                |           |
| protein_coding                       | kinetochore associated 1 [Source:HGNC Symbol;Acc:HGNC:17255]                    |             |             |             |                | -         |
| 747                                  | 7.209685324                                                                     | 6.482014305 | 1778        | 827         |                | 850       |
| 3.530762582                          | 3.27068947                                                                      | 3.079132849 | 7.272705501 |             |                |           |
| ENSG00000233922                      | 727.728894                                                                      | 738.7800593 | 694.2368755 |             |                |           |
| 1658.558645                          | 1452.123345                                                                     | 1517.940409 | 720.2486096 |             |                |           |
| 1542.874133                          | -1.09896188                                                                     | 2.30E-13    | 2.72E-11    |             |                |           |
| LINC01694                            | 21                                                                              | 45593654    | 45603056    | +           |                | 6810      |
| lincRNA                              | long intergenic non-protein coding RNA 1694 [Source:HGNC Symbol;Acc:HGNC:52481] |             |             |             |                | -         |
| 1651                                 | 1589                                                                            | 1547        | 629         | 797         |                | 710       |
| 4.829628132                          | 11.72198545                                                                     | 10.16799638 | 5.159946128 |             |                |           |
| ENSG00000105011                      | 1775.936172                                                                     | 1694.466685 | 2063.154658 |             |                |           |
| 765.4886052                          | 689.0503476                                                                     | 924.3050193 | 1844.519172 |             |                |           |

|                                                                       |                                                |             |                |             |
|-----------------------------------------------------------------------|------------------------------------------------|-------------|----------------|-------------|
| 792.9479907                                                           | 1.21821851                                     | 2.85E-13    | 3.35E-11       | ASF1B       |
| 19                                                                    | 14119509                                       | 14136956    | - 2304         |             |
| protein_coding                                                        | anti-silencing function 1B histone chaperone   |             |                |             |
| [Source:HGNC Symbol;Acc:HGNC:20996]                                   | -                                              | 1535        | 1828           | 2110        |
| 762                                                                   | 754 942                                        | 36.4351547  | 34.98063385    |             |
| 42.42310348                                                           | 15.99092967                                    | 14.26091755 | 19.08597998    |             |
| ENSG00000167657                                                       | 1398.766666                                    | 1594.355962 | 1439.319269    |             |
| 2789.713723                                                           | 3124.486921                                    | 2869.074179 | 1477.480632    |             |
| 2927.758274                                                           | -0.986398185                                   | 2.92E-13    | 3.41E-11       | DAPK3       |
| 19                                                                    | 3958453 3971123                                | - 3549      | protein_coding | death       |
| associated protein kinase 3                                           | [Source:HGNC Symbol;Acc:HGNC:2676]             | -           |                |             |
| 1209                                                                  | 1720 1472                                      | 2777 3419   | 2924           | 18.63009263 |
| 21.36763249                                                           | 19.21340186                                    | 37.83302757 | 41.98089558    |             |
| 38.46071952                                                           |                                                |             |                |             |
| ENSG00000198888                                                       | 19795.61427                                    | 26047.32706 | 25163.64224    |             |
| 50338.41013                                                           | 43889.03447                                    | 45882.61891 | 23668.86119    |             |
| 46703.3545                                                            | -0.980477935                                   | 3.37E-13    | 3.91E-11       | MT-ND1      |
| MT                                                                    | 3307 4262                                      | + 956       | protein_coding |             |
| mitochondrially encoded NADH:ubiquinone oxidoreductase core subunit 1 | [Source:HGNC Symbol;Acc:HGNC:7455]             | -           | 17110 28100    | 25735       |
| 50109                                                                 | 48026 46761                                    | 978.7839292 | 1295.932512    |             |
| 1247.006554                                                           | 2534.306048                                    | 2189.158074 | 2283.347092    |             |
| ENSG00000117519                                                       | 4435.791065                                    | 3967.350883 | 4764.811682    |             |
| 1767.053093                                                           | 2379.691121                                    | 2067.4211   | 4389.317876    |             |
| 2071.388438                                                           | 1.083157327                                    | 3.45E-13    | 3.97E-11       | CNN3        |
| 1                                                                     | 94896949                                       | 94927278    | - 2838         |             |
| protein_coding                                                        | calponin 3 [Source:HGNC Symbol;Acc:HGNC:2157]  | -           |                |             |
| 3834                                                                  | 4280 4873                                      | 1759 2604   | 2107           | 73.88128326 |
| 66.49137835                                                           | 79.54016289                                    | 29.96778642 | 39.98408725    |             |
| 34.65757568                                                           |                                                |             |                |             |
| ENSG00000197299                                                       | 885.0756819                                    | 680.3821374 | 839.9288395    |             |
| 264.2040724                                                           | 285.1242818                                    | 328.707199  | 801.7955529    |             |
| 292.6785177                                                           | 1.45332128                                     | 3.56E-13    | 4.06E-11       | BLM         |
| 15                                                                    | 90717327                                       | 90816165    | + 6674         |             |
| protein_coding                                                        | Bloom syndrome RecQ like helicase [Source:HGNC |             |                |             |
| Symbol;Acc:HGNC:1058]                                                 | -                                              | 765 734     | 859 263        | 312         |
| 335                                                                   | 6.268591155                                    | 4.848906564 | 5.962239498    |             |
| 1.905332444                                                           | 2.037168675                                    | 2.343174544 |                |             |
| ENSG00000140945                                                       | 2485.153679                                    | 3134.021807 | 3819.280614    |             |
| 1092.981106                                                           | 1283.973128                                    | 1475.748141 | 3146.152033    |             |
| 1284.234125                                                           | 1.292875736                                    | 4.11E-13    | 4.65E-11       | CDH13       |
| 16                                                                    | 82626803                                       | 83800640    | + 11187        |             |
| protein_coding                                                        | cadherin 13 [Source:HGNC Symbol;Acc:HGNC:1753] | -           |                |             |
| 2148                                                                  | 3381 3906                                      | 1088 1405   | 1504           | 10.5006299  |
| 13.32494701                                                           | 16.17413474                                    | 4.702366489 | 5.472947522    |             |
| 6.275960969                                                           |                                                |             |                |             |
| ENSG00000154839                                                       | 879.2908735                                    | 633.1076292 | 944.55327      |             |
| 298.3597319                                                           | 169.9779372                                    | 253.153604  | 818.9839243    |             |
| 240.4970911                                                           | 1.768613124                                    | 4.33E-13    | 4.87E-11       | SKA1        |
| 18                                                                    | 50374995                                       | 50394173    | + 2950         |             |

|                                     |                                                      |             |             |             |             |
|-------------------------------------|------------------------------------------------------|-------------|-------------|-------------|-------------|
| protein_coding                      | spindle and kinetochore associated complex subunit 1 |             |             |             |             |
| [Source:HGNC Symbol;Acc:HGNC:28109] | -                                                    | 760         | 683         | 966         |             |
|                                     | 297                                                  | 186         | 258         | 14.08919854 | 10.20781159 |
| 15.16902148                         | 4.867832768                                          | 2.747574809 | 4.082664813 |             |             |
| ENSG00000162745                     | 573.8529912                                          | 557.0976356 | 1082.422847 |             |             |
| 220.0026306                         | 111.490905                                           | 163.8629918 | 737.7911578 |             |             |
| 165.1188425                         | 2.161294373                                          | 4.60E-13    | 5.14E-11    |             |             |
| OLFML2B 1                           | 161983192                                            | 162023854   | -           | 3415        |             |
| protein_coding                      | olfactomedin like 2B [Source:HGNC                    |             |             |             |             |
| Symbol;Acc:HGNC:24558]              | -                                                    | 496         | 601         | 1107        | 219         |
|                                     | 167                                                  | 7.94302046  | 7.759213858 | 15.01617665 | 122         |
| 3.100663403                         | 1.556781709                                          | 2.282820684 |             |             |             |
| ENSG00000101057                     | 2656.384007                                          | 3131.240954 | 4804.901417 |             |             |
| 1278.828077                         | 1222.744516                                          | 1473.78571  | 3530.842126 |             |             |
| 1325.119434                         | 1.414138033                                          | 5.37E-13    | 5.95E-11    |             | MYBL2       |
|                                     | 20                                                   | 43667019    | 43716496    | +           | 2777        |
| protein_coding                      | MYB proto-oncogene like 2 [Source:HGNC               |             |             |             |             |
| Symbol;Acc:HGNC:7548]               | MYB                                                  | 2296        | 3378        | 4914        | 1273        |
|                                     | 1502                                                 | 45.2158518  | 53.63122581 | 81.97128216 | 1338        |
| 22.16428574                         | 20.99610961                                          | 25.24876201 |             |             |             |
| ENSG00000164109                     | 2325.492968                                          | 1800.139116 | 2459.163017 |             |             |
| 874.9876314                         | 1078.354655                                          | 849.7326399 | 2194.9317   |             |             |
| 934.3583089                         | 1.231631599                                          | 5.47E-13    | 6.02E-11    |             | MAD2L1      |
|                                     | 4                                                    | 120055608   | 120067074   | -           | 5748        |
| protein_coding                      | mitotic arrest deficient 2 like 1 [Source:HGNC       |             |             |             |             |
| Symbol;Acc:HGNC:6763]               | -                                                    | 2010        | 1942        | 2515        | 871         |
|                                     | 866                                                  | 19.12379197 | 14.89588889 | 20.26859691 | 1180        |
| 7.3266022                           | 8.945896012                                          | 7.033106088 |             |             |             |
| ENSG00000185950                     | 836.4832915                                          | 1140.149903 | 906.4191318 |             |             |
| 2675.191805                         | 2037.907527                                          | 2105.688505 | 961.0174422 |             |             |
| 2272.929279                         | -1.241058183                                         | 6.50E-13    | 7.09E-11    |             | IRS2        |
|                                     | 13                                                   | 109752698   | 109786568   | -           | 8138        |
| protein_coding                      | insulin receptor substrate 2 [Source:HGNC            |             |             |             |             |
| Symbol;Acc:HGNC:6126]               | -                                                    | 723         | 1230        | 927         | 2663        |
|                                     | 2146                                                 | 4.858646749 | 6.66379125  | 5.276725525 | 2230        |
| 15.82175654                         | 11.94113959                                          | 12.31000043 |             |             |             |
| ENSG00000118705                     | 4353.646786                                          | 3880.217476 | 5108.996724 |             |             |
| 2275.369673                         | 1775.629742                                          | 2177.317238 | 4447.620329 |             |             |
| 2076.105551                         | 1.09929936                                           | 7.22E-13    | 7.82E-11    |             | RPN2        |
|                                     | 20                                                   | 37178410    | 37241623    | +           | 2819        |
| protein_coding                      | ribophorin II [Source:HGNC Symbol;Acc:HGNC:10382]    |             |             |             |             |
|                                     | -                                                    | 3763        | 4186        | 5225        | 2265        |
|                                     | 73.00184817                                          | 65.4693616  | 85.8605517  | 38.84850825 |             |
| 30.03560073                         | 36.74584698                                          |             |             |             |             |
| ENSG00000035862                     | 12381.80385                                          | 7443.417661 | 12964.6292  |             |             |
| 4408.089238                         | 4833.404892                                          | 4074.988052 | 10929.95024 |             |             |
| 4438.827394                         | 1.299933346                                          | 7.27E-13    | 7.82E-11    |             | TIMP2       |
|                                     | 17                                                   | 78852977    | 78925387    | -           | 5633        |
| protein_coding                      | TIMP metalloproteinase inhibitor 2 [Source:HGNC      |             |             |             |             |
| Symbol;Acc:HGNC:11821]              | -                                                    | 10702       | 8030        | 13259       | 4388        |
|                                     |                                                      |             |             |             | 5289        |

|                                      |                                                    |             |             |        |
|--------------------------------------|----------------------------------------------------|-------------|-------------|--------|
| 4153                                 | 103.9010432                                        | 62.85064689 | 109.0368949 |        |
| 37.66414249                          | 40.91592874                                        | 34.41661992 |             |        |
| ENSG00000161800                      | 2360.201818                                        | 1986.456295 | 2770.102913 |        |
| 1011.61027                           | 1032.661661                                        | 1156.853097 | 2372.253675 |        |
| 1067.041676                          | 1.152583452                                        | 8.47E-13    | 9.01E-11    |        |
| RACGAP1 12                           | 49976923                                           | 50033136    | - 4487      |        |
| protein_coding                       | Rac GTPase activating protein 1 [Source:HGNC       |             |             |        |
| Symbol;Acc:HGNC:9804]                | -                                                  | 2040 2143   | 2833 1007   | 1130   |
| 1179                                 | 24.86387482                                        | 21.05717272 | 29.2477836  |        |
| 10.85112128                          | 10.9744047                                         | 12.26602291 |             |        |
| ENSG00000121152                      | 1425.376784                                        | 1357.05647  | 1795.237892 |        |
| 721.2871634                          | 487.0873147                                        | 440.5657682 | 1525.890382 |        |
| 549.6467488                          | 1.47355933                                         | 8.49E-13    | 9.01E-11    | NCAPH  |
| 2                                    | 96335787                                           | 96373845    | + 3278      |        |
| protein_coding                       | non-SMC condensin I complex subunit H [Source:HGNC |             |             |        |
| Symbol;Acc:HGNC:1112]                | -                                                  | 1232 1464   | 1836 718    | 533    |
| 449                                  | 20.55400564                                        | 19.69092352 | 25.94574727 |        |
| 10.59050602                          | 7.085603685                                        | 6.394158944 |             |        |
| ENSG00000091986                      | 1035.4807                                          | 1082.678933 | 1736.569987 |        |
| 374.7076768                          | 283.296562                                         | 500.4199149 | 1284.909873 |        |
| 386.1413846                          | 1.735203286                                        | 8.72E-13    | 9.19E-11    | CCDC80 |
| 3                                    | 112596794                                          | 112649530   | - 13071     |        |
| protein_coding                       | coiled-coil domain containing 80 [Source:HGNC      |             |             |        |
| Symbol;Acc:HGNC:30649]               | -                                                  | 895 1168    | 1776 373    | 310    |
| 510                                  | 3.744630182                                        | 3.939743849 | 6.294142956 |        |
| 1.37975264                           | 1.03350237                                         | 1.821408661 |             |        |
| ENSG00000138587                      | 358.6581195                                        | 351.3144824 | 431.2091015 |        |
| 108.494448                           | 112.4047649                                        | 108.9149227 | 380.3939011 |        |
| 109.9380452                          | 1.790825051                                        | 9.42E-13    | 9.85E-11    | MNS1   |
| 15                                   | 56421544                                           | 56465137    | - 2504      |        |
| protein_coding                       | meiosis specific nuclear structural 1 [Source:HGNC |             |             |        |
| Symbol;Acc:HGNC:29636]               | -                                                  | 310 379     | 441 108     | 123    |
| 111                                  | 6.770520884                                        | 6.673272254 | 8.158432426 |        |
| 2.085406138                          | 2.140569754                                        | 2.06935352  |             |        |
| ENSG00000129116                      | 2943.310503                                        | 2769.730009 | 3911.193665 |        |
| 1536.000101                          | 1444.812466                                        | 1414.912779 | 3208.078059 |        |
| 1465.241782                          | 1.130672739                                        | 9.47E-13    | 9.85E-11    | PALLD  |
| 4                                    | 168497066                                          | 168928457   | + 10114     |        |
| protein_coding                       | "palladin, cytoskeletal associated protein         |             |             |        |
| [Source:HGNC Symbol;Acc:HGNC:17068]" | -                                                  |             | 2544 2988   | 4000   |
| 1529                                 | 1581 1442                                          | 13.75589558 | 13.02541598 |        |
| 18.32059178                          | 7.309467722                                        | 6.811888308 | 6.655617376 |        |
| ENSG00000126890                      | 242.9619519                                        | 199.2944953 | 234.6716199 |        |
| 44.20144177                          | 49.34843338                                        | 38.26740526 | 225.642689  |        |
| 43.93909347                          | 2.358838433                                        | 1.03E-12    | 1.06E-10    | CTAG2  |
| X                                    | 154651972                                          | 154653579   | - 993       |        |
| protein_coding                       | cancer/testis antigen 2 [Source:HGNC               |             |             |        |
| Symbol;Acc:HGNC:2492]                | -                                                  | 210 215     | 240 44      | 54     |
| 39                                   | 11.56550922                                        | 9.546038232 | 11.1960402  |        |
| 2.142420151                          | 2.369753149                                        | 1.833417593 |             |        |



|                                                                                            |                      |             |                 |             |                        |                     |
|--------------------------------------------------------------------------------------------|----------------------|-------------|-----------------|-------------|------------------------|---------------------|
| ENSG00000204054                                                                            | 431.546705           |             | 424.5436225     |             | 494.7659986            |                     |
| 1086.953636                                                                                | 986.0548077          |             | 1045.975744     |             | 450.285442             |                     |
| 1039.661396                                                                                | -1.206875408         |             | 1.05E-12        |             | 1.08E-10               |                     |
| LINC00963                                                                                  | 9                    | 129483451   |                 | 129513686   | +                      | 13171               |
|                                                                                            | processed_transcript |             | long intergenic |             | non-protein coding RNA |                     |
| 963 [Source:HGNC Symbol;Acc:HGNC:48716]                                                    | -                    |             |                 |             | 373                    | 458                 |
|                                                                                            | 1082                 | 1079        | 1066            | 1.548762394 |                        | 1.533136016         |
| 1.779648459                                                                                | 3.97200446           |             | 3.569943088     |             | 3.77819606             |                     |
| ENSG00000111665                                                                            | 470.883402           |             | 524.6543457     |             | 753.8825789            |                     |
| 180.82408                                                                                  | 93.2137075           |             | 162.8817762     |             | 583.1401089            |                     |
| 145.6398546                                                                                | 2.003508781          |             | 1.67E-12        |             | 1.71E-10               | CDCA3               |
|                                                                                            | 12                   | 6844793     | 6852066         | -           | 5653                   | protein_coding cell |
| division cycle associated 3 [Source:HGNC Symbol;Acc:HGNC:14624]                            | -                    |             |                 |             |                        |                     |
|                                                                                            | 407                  | 566         | 771             | 180         | 102                    | 166                 |
|                                                                                            | 4.41439716           |             | 6.317974204     |             | 1.539553325            |                     |
|                                                                                            | 1.370803291          |             |                 |             |                        | 0.786284626         |
| ENSG00000168003                                                                            | 7819.903966          |             | 10119.5256      |             | 7741.230061            |                     |
| 18496.29422                                                                                | 15754.94429          |             | 16489.3268      |             | 8560.219877            |                     |
| 16913.52177                                                                                | -0.982345487         |             | 2.27E-12        |             | 2.29E-10               | SLC3A2              |
|                                                                                            | 11                   | 62856102    |                 | 62888875    | +                      | 5178                |
| protein_coding solute carrier family 3 member 2 [Source:HGNC Symbol;Acc:HGNC:11026]        | -                    |             | 6759            | 10917       | 7917                   | 18412               |
|                                                                                            | 16805                | 71.3863395  |                 | 92.95552802 |                        | 70.82736005         |
| 171.9254369                                                                                | 145.0887747          |             | 151.5034444     |             |                        |                     |
| ENSG00000167325                                                                            | 4786.350452          |             | 4032.237463     |             | 4984.816326            |                     |
| 1832.350677                                                                                | 2503.062204          |             | 2229.32166      |             | 4601.134747            |                     |
| 2188.244847                                                                                | 1.071956656          |             | 2.47E-12        |             | 2.49E-10               | RRM1                |
|                                                                                            | 11                   | 4094707     | 4138876         | +           | 4177                   | protein_coding      |
| ribonucleotide reductase catalytic subunit M1 [Source:HGNC Symbol;Acc:HGNC:10451]          | -                    |             | 4137            | 4350        | 5098                   | 1824                |
|                                                                                            | 2272                 | 54.1646272  |                 | 45.91543886 |                        | 56.53765764         |
| 21.11356527                                                                                | 28.57499445          |             | 25.39158946     |             |                        |                     |
| ENSG00000151503                                                                            | 3815.659607          |             | 3710.585417     |             | 4361.958734            |                     |
| 2240.209435                                                                                | 1872.498889          |             | 1979.111703     |             | 3962.734586            |                     |
| 2030.606676                                                                                | 0.964747222          |             | 2.55E-12        |             | 2.54E-10               | NCAPD3              |
|                                                                                            | 11                   | 134150119   |                 | 134225454   | -                      | 9114                |
| protein_coding non-SMC condensin II complex subunit D3 [Source:HGNC Symbol;Acc:HGNC:28952] | -                    |             | 3298            | 4003        | 4461                   | 2230                |
|                                                                                            | 2017                 | 19.78956918 |                 | 19.36468888 |                        | 22.67387013         |
| 11.83033534                                                                                | 9.796964445          |             | 10.33101304     |             |                        |                     |
| ENSG00000092853                                                                            | 1682.222276          |             | 1547.081454     |             | 1764.926141            |                     |
| 798.6396865                                                                                | 834.3540681          |             | 827.1646829     |             | 1664.743291            |                     |
| 820.0528125                                                                                | 1.021338843          |             | 2.66E-12        |             | 2.64E-10               | CLSPN               |
|                                                                                            | 1                    | 35720218    |                 | 35769967    | -                      | 5411                |
| protein_coding claspin [Source:HGNC Symbol;Acc:HGNC:19715]                                 | -                    |             |                 |             |                        |                     |
|                                                                                            | 1454                 | 1669        | 1805            | 795         | 913                    | 843                 |
|                                                                                            | 13.59918121          |             | 15.45262012     |             | 7.103801396            |                     |
|                                                                                            | 7.272706754          |             |                 |             |                        | 14.69540587         |
| ENSG00000119630                                                                            | 1211.338874          |             | 999.2533298     |             | 1258.426562            |                     |
| 417.9045404                                                                                | 487.0873147          |             | 540.6497512     |             | 1156.339589            |                     |

|                                    |                                         |             |                  |        |
|------------------------------------|-----------------------------------------|-------------|------------------|--------|
| 481.8805354                        | 1.262381649                             | 3.12E-12    | 3.08E-10         | PGF    |
| 14                                 | 74941834                                | 74955784    | - 5962           |        |
| protein_coding                     | placental growth factor [Source:HGNC    |             |                  |        |
| Symbol;Acc:HGNC:8893]              | -                                       | 1047 1078   | 1287 416         | 533    |
| 551                                | 9.603939658                             | 7.971879898 | 9.999747433      |        |
| 3.373669815                        | 3.89577472                              | 4.314253529 |                  |        |
| ENSG00000090530                    | 474.354287                              | 467.183375  | 585.7012513      |        |
| 155.7096244                        | 119.7156439                             | 187.4121642 | 509.0796378      |        |
| 154.2791442                        | 1.723563918                             | 3.33E-12    | 3.26E-10         | P3H2   |
| 3                                  | 189956728                               | 190122437   | - 5605           |        |
| protein_coding                     | prolyl 3-hydroxylase 2 [Source:HGNC     |             |                  |        |
| Symbol;Acc:HGNC:19317]             | -                                       | 410 504     | 599 155          | 131    |
| 191                                | 4.000395707                             | 3.964504156 | 4.950552395      |        |
| 1.337079708                        | 1.018484154                             | 1.590756792 |                  |        |
| ENSG00000119326                    | 1913.614612                             | 1787.1618   | 1732.658793      |        |
| 538.453927                         | 933.0509348                             | 649.5646739 | 1811.145068      |        |
| 707.0231786                        | 1.356306148                             | 3.88E-12    | 3.78E-10         |        |
| CTNNAL1 9                          | 108942569                               | 109013529   | - 3131           |        |
| protein_coding                     | catenin alpha like 1 [Source:HGNC       |             |                  |        |
| Symbol;Acc:HGNC:2512]              | -                                       | 1654 1928   | 1772 536         | 1021   |
| 662                                | 28.88997396                             | 27.1492552  | 26.21700674      |        |
| 8.27719027                         | 14.2102354                              | 9.870086474 |                  |        |
| ENSG00000109674                    | 348.2454644                             | 298.4782674 | 419.4755205      |        |
| 81.37083598                        | 90.47212786                             | 109.8961382 | 355.3997508      |        |
| 93.91303401                        | 1.919871268                             | 4.18E-12    | 4.04E-10         | NEIL3  |
| 4                                  | 177309836                               | 177362943   | + 2959           |        |
| protein_coding                     | nei like DNA glycosylase 3 [Source:HGNC |             |                  |        |
| Symbol;Acc:HGNC:24573]             | -                                       | 301 322     | 429 81           | 99     |
| 112                                | 5.563092013                             | 4.797830097 | 6.716063332      |        |
| 1.323552797                        | 1.457970804                             | 1.766928978 |                  |        |
| ENSG00000162413                    | 4552.644194                             | 6126.22009  | 4145.865285      |        |
| 12052.92951                        | 10603.51616                             | 9404.950754 | 4941.576523      |        |
| 10687.13214                        | -1.112686095                            | 4.43E-12    | 4.26E-10         | KLHL21 |
| 1                                  | 6590724 6614607                         | - 6901      | protein_coding   | kelch  |
| like family member 21 [Source:HGNC | Symbol;Acc:HGNC:29041]                  |             |                  | -      |
| 3935                               | 6609 4240                               | 11998 11603 | 9585 31.18368408 |        |
| 42.22383565                        | 28.46140171                             | 84.0616764  | 73.26842612      |        |
| 64.83747979                        |                                         |             |                  |        |
| ENSG00000259781                    | 1306.209732                             | 1299.585499 | 1672.035292      |        |
| 679.0948781                        | 627.8217358                             | 551.4431219 | 1425.943508      |        |
| 619.4532453                        | 1.203060707                             | 4.72E-12    | 4.51E-10         |        |
| HMGB1P6 15                         | 71164770                                | 71165415    | - 646            |        |
| processed_pseudogene               | high mobility group box 1 pseudogene 6  |             |                  |        |
| [Source:HGNC                       | Symbol;Acc:HGNC:4998]                   |             |                  | -      |
| 676                                | 687 562                                 | 95.57760345 | 95.68623214      | 1710   |
| 122.6213373                        | 50.59590803                             | 46.34285835 | 40.61157507      |        |
| ENSG00000136153                    | 2458.543561                             | 2316.450901 | 3510.296314      |        |
| 1167.319894                        | 867.2530237                             | 1270.674098 | 2761.763592      |        |
| 1101.749005                        | 1.3261256                               | 5.06E-12    | 4.80E-10         | LM07   |
| 13                                 | 75620434                                | 75859870    | + 14367          |        |



|                 |                                                                                                                                         |             |             |             |                |
|-----------------|-----------------------------------------------------------------------------------------------------------------------------------------|-------------|-------------|-------------|----------------|
|                 | 5299                                                                                                                                    | 106.7050837 | 85.64162902 | 124.4246006 |                |
| 54.78592165     |                                                                                                                                         | 53.47240964 | 51.20388551 |             |                |
| ENSG00000136205 |                                                                                                                                         | 3984.576011 | 4217.627691 | 6354.711907 |                |
| 2063.403668     |                                                                                                                                         | 2154.881591 | 2190.073039 | 4852.305203 |                |
| 2136.119433     |                                                                                                                                         | 1.183780634 | 7.54E-12    | 6.86E-10    | TNS3           |
|                 | 7                                                                                                                                       | 47275154    | 47582558    | -           | 11797          |
| protein_coding  | tensin 3 [Source:HGNC Symbol;Acc:HGNC:21616]                                                                                            |             |             |             | -              |
|                 | 3444                                                                                                                                    | 4550        | 6499        | 2054        | 2358           |
|                 | 17.00488797                                                                                                                             |             | 25.51980863 | 8.418410059 | 8.710253988    |
|                 | 8.832194953                                                                                                                             |             |             |             |                |
| ENSG00000111247 |                                                                                                                                         | 726.5719323 | 759.1729844 | 761.7049662 |                |
| 172.7874542     |                                                                                                                                         | 319.8509571 | 253.153604  | 749.149961  |                |
| 248.5973384     |                                                                                                                                         | 1.590279225 | 8.60E-12    | 7.78E-10    |                |
| RAD51AP1        | 12                                                                                                                                      | 4538798     | 4560048 +   | 2558        | protein_coding |
|                 | RAD51 associated protein 1 [Source:HGNC Symbol;Acc:HGNC:16956]                                                                          |             |             |             |                |
|                 | -                                                                                                                                       | 628         | 819         | 779         | 172            |
|                 | 13.42622177                                                                                                                             |             | 14.11618429 | 14.1071529  | 3.251090981    |
| 5.962468559     |                                                                                                                                         | 4.708311649 |             |             |                |
| ENSG00000102038 |                                                                                                                                         | 4809.489686 | 4078.58502  | 4924.192824 |                |
| 2192.994259     |                                                                                                                                         | 2204.230024 | 2663.01892  | 4604.089176 |                |
| 2353.414401     |                                                                                                                                         | 0.968097882 | 9.09E-12    | 8.18E-10    |                |
| SMARCA1 X       |                                                                                                                                         | 129446501   | 129523500   | -           | 4363           |
| protein_coding  | "SWI/SNF related, matrix associated, actin dependent regulator of chromatin, subfamily a, member 1 [Source:HGNC Symbol;Acc:HGNC:11097]" |             |             |             | -              |
|                 | 2714                                                                                                                                    | 52.10621466 | 44.46327228 | 53.46911111 |                |
| 24.19188666     |                                                                                                                                         | 24.09077038 | 29.03826513 |             |                |
| ENSG00000183741 |                                                                                                                                         | 1405.708436 | 1981.821539 | 1625.100968 |                |
| 3737.030986     |                                                                                                                                         | 3262.479762 | 3416.592439 | 1670.876981 |                |
| 3472.034396     |                                                                                                                                         | -1.0545042  | 9.65E-12    | 8.63E-10    | CBX6           |
|                 | 22                                                                                                                                      | 38861450    | 38872314    | -           | 8030           |
| protein_coding  | chromobox 6 [Source:HGNC Symbol;Acc:HGNC:1556]                                                                                          |             |             |             | -              |
|                 | 1215                                                                                                                                    | 2138        | 1662        | 3720        | 3570           |
|                 | 11.73886515                                                                                                                             |             | 9.587777125 | 22.39899904 | 19.37364192    |
|                 | 20.24227205                                                                                                                             |             |             |             |                |
| ENSG00000106333 |                                                                                                                                         | 1661.396966 | 1579.524744 | 3215.978991 |                |
| 604.7560897     |                                                                                                                                         | 606.8029586 | 845.8077778 | 2152.300234 |                |
| 685.788942      |                                                                                                                                         | 1.650270057 | 9.78E-12    | 8.69E-10    | PCOLCE         |
|                 | 7                                                                                                                                       | 100602177   | 100608175   | +           | 3532           |
| protein_coding  | procollagen C-endopeptidase enhancer [Source:HGNC Symbol;Acc:HGNC:8738]                                                                 |             |             |             | -              |
|                 | 862                                                                                                                                     | 22.23455581 | 21.27075246 | 43.1365725  |                |
| 8.240944946     |                                                                                                                                         | 8.192302538 | 11.39285596 |             |                |
| ENSG00000137831 |                                                                                                                                         | 2585.809345 | 1850.194477 | 2575.521028 |                |
| 1139.191704     |                                                                                                                                         | 969.6053299 | 1070.506132 | 2337.17495  |                |
| 1059.767722     |                                                                                                                                         | 1.140878355 | 9.93E-12    | 8.78E-10    | UACA           |
|                 | 15                                                                                                                                      | 70654554    | 70763593    | -           | 11031          |
| protein_coding  | uveal autoantigen with coiled-coil domains and ankyrin repeats [Source:HGNC Symbol;Acc:HGNC:15947]                                      |             |             |             | -              |
|                 | 2634                                                                                                                                    | 1134        | 1061        | 1091        | 11.08044891    |
|                 |                                                                                                                                         |             |             |             | 7.977735079    |

|                                     |                                                |             |             |             |        |
|-------------------------------------|------------------------------------------------|-------------|-------------|-------------|--------|
|                                     | 11.06122794                                    | 4.970492084 | 4.191399884 | 4.616957766 |        |
| ENSG00000138119                     | 3651.371049                                    | 3833.869919 | 3902.393479 |             |        |
| 1699.746352                         | 1675.105155                                    | 2248.945971 | 3795.878149 |             |        |
| 1874.599159                         | 1.0179883                                      | 1.01E-11    | 8.85E-10    |             | MYOF   |
| 10                                  | 93306429                                       | 93482317    | -           | 8473        |        |
| protein_coding                      | myoferlin [Source:HGNC Symbol;Acc:HGNC:3656]   |             |             |             | -      |
| 3156                                | 4136                                           | 3991        | 1692        | 1833        | 2292   |
| 21.5217351                          | 21.81960967                                    | 9.655268797 | 9.427224648 |             |        |
|                                     | 12.62767636                                    |             |             |             |        |
| ENSG00000087074                     | 2043.194319                                    | 3959.008323 | 2560.854052 |             |        |
| 6639.257469                         | 6999.252801                                    | 7769.264483 | 2854.352231 |             |        |
| 7135.924918                         | -1.321504681                                   | 1.13E-11    | 9.89E-10    |             |        |
| PPP1R15A                            | 19                                             | 48872392    | 48876057    | +           | 3093   |
| protein_coding                      | protein phosphatase 1 regulatory subunit 15A   |             |             |             |        |
| [Source:HGNC Symbol;Acc:HGNC:14375] |                                                |             | -           | 1766        | 4271   |
| 6609                                | 7659                                           | 7918        | 31.22521893 | 60.88125683 | 2619   |
| 39.22455581                         | 103.3134938                                    | 107.9072804 | 119.5037719 |             |        |
| ENSG00000166949                     | 1876.591838                                    | 1383.011102 | 2848.326786 |             |        |
| 832.7953461                         | 653.4098124                                    | 643.6773808 | 2035.976575 |             |        |
| 709.9608464                         | 1.520065798                                    | 1.61E-11    | 1.40E-09    |             | SMAD3  |
| 15                                  | 67063763                                       | 67195195    | +           | 9113        |        |
| protein_coding                      | SMAD family member 3 [Source:HGNC              |             |             |             |        |
| Symbol;Acc:HGNC:6769]               | MH1                                            | 1622        | 1492        | 2913        | 829    |
| 656                                 | 9.733839756                                    | 7.218407753 | 14.80749416 |             | 715    |
| 4.398396499                         | 3.419032817                                    | 3.36038088  |             |             |        |
| ENSG00000122966                     | 1077.13132                                     | 1075.263323 | 1667.1463   |             |        |
| 506.3074239                         | 467.8962572                                    | 522.9878719 | 1273.180314 |             |        |
| 499.063851                          | 1.35154468                                     | 2.03E-11    | 1.75E-09    |             | CIT    |
| 12                                  | 119685790                                      | 119877291   | -           | 13230       |        |
| protein_coding                      | citron rho-interacting serine/threonine kinase |             |             |             |        |
| [Source:HGNC Symbol;Acc:HGNC:1985]  |                                                |             | -           | 931         | 1160   |
| 504                                 | 512                                            | 533         | 3.84843849  | 3.86573521  | 1705   |
| 5.969899154                         | 1.841924857                                    | 1.686431535 | 1.880673481 |             |        |
| ENSG00000142039                     | 858.4655634                                    | 982.5682093 | 934.7752859 |             |        |
| 2234.181966                         | 1684.243754                                    | 1900.614461 | 925.2696862 |             |        |
| 1939.68006                          | -1.067253454                                   | 2.08E-11    | 1.79E-09    |             | CCDC97 |
| 19                                  | 41310189                                       | 41324883    | +           | 3821        |        |
| protein_coding                      | coiled-coil domain containing 97 [Source:HGNC  |             |             |             |        |
| Symbol;Acc:HGNC:28289]              |                                                |             | -           | 742         | 1060   |
| 1937                                | 10.61992819                                    | 12.23102308 | 11.58999665 | 956         | 2224   |
| 28.14225939                         | 21.01875051                                    | 23.66457008 |             |             | 1843   |
| ENSG00000158402                     | 233.7062585                                    | 228.0299806 | 330.4958647 |             |        |
| 34.15565955                         | 70.36721056                                    | 51.02320701 | 264.0773679 |             |        |
| 51.84869237                         | 2.345802352                                    | 2.52E-11    | 2.15E-09    |             | CDC25C |
| 5                                   | 138285265                                      | 138338355   | -           | 3338        |        |
| protein_coding                      | cell division cycle 25C [Source:HGNC           |             |             |             |        |
| Symbol;Acc:HGNC:1727]               |                                                |             | -           | 202         | 246    |
| 52                                  | 3.309479916                                    | 3.249247046 | 4.690647787 | 338         | 34     |
| 0.4924859                           | 1.005224328                                    | 0.727215366 |             |             | 77     |
| ENSG00000050165                     | 1137.293327                                    | 1201.328679 | 1849.016805 |             |        |

|                                                              |                                                       |             |                  |        |
|--------------------------------------------------------------|-------------------------------------------------------|-------------|------------------|--------|
| 455.0739346                                                  | 409.4092251                                           | 627.9779325 | 1395.879604      |        |
| 497.4870307                                                  | 1.488960231                                           | 2.65E-11    | 2.25E-09         | DKK3   |
| 11                                                           | 11963106                                              | 12009769    | - 5059           |        |
| protein_coding                                               | dickkopf WNT signaling pathway inhibitor 3            |             |                  |        |
| [Source:HGNC Symbol;Acc:HGNC:2893]                           |                                                       | -           | 983 1296         | 1891   |
| 453                                                          | 448 640                                               | 10.62633618 | 11.29468908      |        |
| 17.31527149                                                  | 4.329470044                                           | 3.858974709 | 5.90556332       |        |
| ENSG00000126777                                              | 5580.026162                                           | 4803.460812 | 5762.166066      |        |
| 3068.986468                                                  | 2941.714945                                           | 2940.702912 | 5381.884347      |        |
| 2983.801442                                                  | 0.850889594                                           | 2.73E-11    | 2.30E-09         | KTN1   |
| 14                                                           | 55559072                                              | 55701526    | + 17575          |        |
| protein_coding                                               | kinectin 1 [Source:HGNC Symbol;Acc:HGNC:6467]         |             |                  | -      |
| 4823                                                         | 5182 5893                                             | 3055 3219   | 2997 15.00778644 |        |
| 12.99978091                                                  | 15.53257872                                           | 8.404600938 | 7.981494905      |        |
| 7.960446815                                                  |                                                       |             |                  |        |
| ENSG00000123219                                              | 822.5997514                                           | 547.8281242 | 786.1499266      |        |
| 277.2635893                                                  | 271.4163836                                           | 225.6795695 | 718.8592674      |        |
| 258.1198474                                                  | 1.476840775                                           | 2.97E-11    | 2.50E-09         | CENPK  |
| 5                                                            | 65517766                                              | 65563171    | - 4312           |        |
| protein_coding                                               | centromere protein K [Source:HGNC                     |             |                  |        |
| Symbol;Acc:HGNC:29479]                                       | -                                                     | 711 591     | 804 276          | 297    |
| 230                                                          | 9.017487756                                           | 6.042862142 | 8.637334767      |        |
| 3.094792576                                                  | 3.001485813                                           | 2.489975762 |                  |        |
| ENSG00000146670                                              | 1771.308326                                           | 1761.207168 | 2376.050151      |        |
| 956.3584674                                                  | 943.1033935                                           | 849.7326399 | 1969.521881      |        |
| 916.3981669                                                  | 1.103930728                                           | 3.00E-11    | 2.51E-09         | CDCA5  |
| 11                                                           | 65066300                                              | 65084164    | - 3925           |        |
| protein_coding                                               | cell division cycle associated 5 [Source:HGNC         |             |                  |        |
| Symbol;Acc:HGNC:14626]                                       | -                                                     | 1531 1900   | 2430 952         | 1032   |
| 866                                                          | 21.33193454                                           | 21.34262815 | 28.67933443      |        |
| 11.72731266                                                  | 11.45773132                                           | 10.29969269 |                  |        |
| ENSG00000145934                                              | 372.5416596                                           | 550.6089777 | 890.7743571      |        |
| 149.6821551                                                  | 83.16124884                                           | 172.6939314 | 604.6416648      |        |
| 135.1791118                                                  | 2.163169769                                           | 3.51E-11    | 2.92E-09         | TENM2  |
| 5                                                            | 167284799                                             | 168264157   | + 11042          |        |
| protein_coding                                               | teneurin transmembrane protein 2 [Source:HGNC         |             |                  |        |
| Symbol;Acc:HGNC:29943]                                       | -                                                     | 322 594     | 911 149          | 91     |
| 176                                                          | 1.594787568                                           | 2.371770484 | 3.821845179      |        |
| 0.652438743                                                  | 0.359130465                                           | 0.744065145 |                  |        |
| ENSG00000164442                                              | 1664.867851                                           | 2327.574315 | 1365.984387      |        |
| 3674.747136                                                  | 4666.168534                                           | 4126.992475 | 1786.142184      |        |
| 4155.969382                                                  | -1.218088463                                          | 3.65E-11    | 3.01E-09         | CITED2 |
| 6                                                            | 139371807                                             | 139374620   | - 2535           |        |
| protein_coding                                               | Cbp/p300 interacting transactivator with Glu/Asp rich |             |                  |        |
| carboxy-terminal domain 2 [Source:HGNC Symbol;Acc:HGNC:1987] |                                                       |             |                  | -      |
| 1439                                                         | 2511 1397                                             | 3658 5106   | 4206 31.04399058 |        |
| 43.67196236                                                  | 25.52824142                                           | 69.76971581 | 87.77310149      |        |
| 77.45283887                                                  |                                                       |             |                  |        |
| ENSG00000165480                                              | 845.7389849                                           | 696.1403068 | 777.3497408      |        |
| 360.6435817                                                  | 270.5025237                                           | 229.6044316 | 773.0763442      |        |

|                                     |                                                      |             |                  |        |
|-------------------------------------|------------------------------------------------------|-------------|------------------|--------|
| 286.9168457                         | 1.430036562                                          | 4.06E-11    | 3.34E-09         | SKA3   |
| 13                                  | 21153595                                             | 21176602    | - 3048           |        |
| protein_coding                      | spindle and kinetochore associated complex subunit 3 |             |                  |        |
| [Source:HGNC Symbol;Acc:HGNC:20262] | -                                                    | 731         | 751 795          |        |
| 359                                 | 296 234                                              | 13.11587071 | 10.86322894      |        |
| 12.08243929                         | 5.69482919                                           | 4.231899507 | 3.583826121      |        |
| ENSG00000204262                     | 3056.692747                                          | 1801.066067 | 3962.039182      |        |
| 977.45461                           | 947.6726929                                          | 1227.500615 | 2939.932665      |        |
| 1050.875973                         | 1.484131277                                          | 4.35E-11    | 3.55E-09         | COL5A2 |
| 2                                   | 189031896                                            | 189225312   | - 7453           |        |
| protein_coding                      | collagen type V alpha 2 chain [Source:HGNC           |             |                  |        |
| Symbol;Acc:HGNC:2210]               | -                                                    | 2642 1943   | 4052 973 1037    |        |
| 1251                                | 19.38636587                                          | 11.49411763 | 25.18493134      |        |
| 6.312231752                         | 6.063260575                                          | 7.8355994   |                  |        |
| ENSG00000113368                     | 3946.396276                                          | 3848.701137 | 5338.779352      |        |
| 2247.241483                         | 1869.757309                                          | 2234.227738 | 4377.958922      |        |
| 2117.07551                          | 1.048369784                                          | 4.71E-11    | 3.83E-09         | LMNB1  |
| 5                                   | 126776623                                            | 126837020   | + 3633           |        |
| protein_coding                      | lamin B1 [Source:HGNC Symbol;Acc:HGNC:6637]          |             |                  | -      |
| 3411                                | 4152 5460                                            | 2237 2046   | 2277 51.34652231 |        |
| 50.38785895                         | 69.61930775                                          | 29.77157446 | 24.54137147      |        |
| 29.25793485                         |                                                      |             |                  |        |
| ENSG00000139618                     | 2345.161317                                          | 1786.234848 | 1977.108397      |        |
| 1084.94448                          | 913.8598774                                          | 953.7414849 | 2036.168188      |        |
| 984.1819474                         | 1.048613393                                          | 4.92E-11    | 3.98E-09         | BRCA2  |
| 13                                  | 32315474                                             | 32400266    | + 12273          |        |
| protein_coding                      | "BRCA2, DNA repair associated [Source:HGNC           |             |                  |        |
| Symbol;Acc:HGNC:1101]"              | -                                                    | 2027 1927   | 2022 1080 1000   |        |
| 972                                 | 9.032286967                                          | 6.922531465 | 7.631903543      |        |
| 4.254751869                         | 3.550649992                                          | 3.697103141 |                  |        |
| ENSG00000140961                     | 231.3923351                                          | 382.8308212 | 336.3626552      |        |
| 874.9876314                         | 738.398781                                           | 1020.46414  | 316.8619372      |        |
| 877.9501842                         | -1.467743454                                         | 6.21E-11    | 5.00E-09         | OSGIN1 |
| 16                                  | 83948282                                             | 83966332    | + 3460           |        |
| protein_coding                      | oxidative stress induced growth inhibitor 1          |             |                  |        |
| [Source:HGNC Symbol;Acc:HGNC:30093] | -                                                    | 200         | 413 344          |        |
| 871                                 | 808 1040                                             | 3.161175516 | 5.262691482      |        |
| 4.605584974                         | 12.17147672                                          | 10.17639275 | 14.03147337      |        |
| ENSG00000013810                     | 1869.650068                                          | 2103.252139 | 2872.771747      |        |
| 1139.191704                         | 692.7057871                                          | 883.0939675 | 2281.891318      |        |
| 904.9971528                         | 1.334824561                                          | 7.16E-11    | 5.73E-09         | TACC3  |
| 4                                   | 1721490 1745176                                      | + 6528      | protein_coding   |        |
| transforming acidic coiled-coil     | containing protein 3 [Source:HGNC                    |             |                  |        |
| Symbol;Acc:HGNC:11524]              | -                                                    | 1616 2269   | 2938 1134 758    |        |
| 900                                 | 13.53804407                                          | 15.32457038 | 20.8484658       |        |
| 8.399126559                         | 5.059966687                                          | 6.435886841 |                  |        |
| ENSG00000128487                     | 746.2402808                                          | 781.4198117 | 1215.403431      |        |
| 377.7214115                         | 320.764817                                           | 293.3834403 | 914.354508       |        |
| 330.6232229                         | 1.468144494                                          | 7.81E-11    | 6.22E-09         | SPECC1 |
| 17                                  | 20009344                                             | 20319026    | + 13676          |        |

|                  |                                                                                                    |             |             |             |             |
|------------------|----------------------------------------------------------------------------------------------------|-------------|-------------|-------------|-------------|
| protein_coding   | sperm antigen with calponin homology and coiled-coil domains 1 [Source:HGNC Symbol;Acc:HGNC:30615] | -           | 645         | 843         |             |
|                  | 1243 376 351 299                                                                                   | 2.57926126  | 2.717705795 |             |             |
|                  | 4.210314059 1.329321317                                                                            | 1.118424371 | 1.020606035 |             |             |
| ENSG00000166033  | 6846.899197                                                                                        | 4003.501977 | 8315.197731 |             |             |
| 1717.82876       | 1124.047649                                                                                        | 1270.674098 | 6388.532968 |             |             |
| 1370.850169      | 2.220459214                                                                                        | 8.01E-11    | 6.35E-09    |             | HTRA1       |
| 10               | 122458551                                                                                          | 122514908   | +           | 2279        |             |
| protein_coding   | HtrA serine peptidase 1 [Source:HGNC Symbol;Acc:HGNC:9476]                                         | -           | 5918 4319   | 8504 1710   | 1230        |
|                  | 1295 142.0120996                                                                                   | 83.55507567 | 172.8547754 |             |             |
| 36.27880738      | 23.5190288                                                                                         | 26.52598252 |             |             |             |
| ENSG00000182158  | 1624.374193                                                                                        | 1404.330978 | 2351.605191 |             |             |
| 807.6808905      | 633.304895                                                                                         | 750.6298724 | 1793.436787 |             |             |
| 730.5385526      | 1.296007392                                                                                        | 8.88E-11    | 6.99E-09    |             |             |
| CREB3L2 7        | 137874979                                                                                          | 138002067   | -           | 8788        |             |
| protein_coding   | cAMP responsive element binding protein 3 like 2 [Source:HGNC Symbol;Acc:HGNC:23720]               | TF_bZIP     | 1404 1515   | 2405        |             |
|                  | 804 693 765                                                                                        | 8.737189844 | 7.600751652 |             |             |
| 12.67732103      | 4.423512074                                                                                        | 3.436384758 | 4.063660549 |             |             |
| ENSG00000167004  | 5304.669283                                                                                        | 4046.14173  | 6033.016228 |             |             |
| 2143.769926      | 2301.099171                                                                                        | 2813.144894 | 5127.942414 |             |             |
| 2419.337997      | 1.083694919                                                                                        | 9.82E-11    | 7.70E-09    |             | PDIA3       |
| 15               | 43746392                                                                                           | 43773279    | +           | 4240        |             |
| protein_coding   | protein disulfide isomerase family A member 3 [Source:HGNC Symbol;Acc:HGNC:4606]                   | -           | 4585 4365   | 6170        |             |
|                  | 2134 2518 2867                                                                                     | 59.13821286 | 45.38918131 |             |             |
| 67.40960204      | 24.33491171                                                                                        | 25.87905818 | 31.56515107 |             |             |
| ENSG00000106003  | 559.969451                                                                                         | 832.4021245 | 1284.827119 |             |             |
| 261.1903377      | 187.3412749                                                                                        | 313.9889662 | 892.3995648 |             |             |
| 254.1735263      | 1.813089145                                                                                        | 1.04E-10    | 8.12E-09    |             | LFNG        |
| 7                | 2512529 2529177                                                                                    | +           | 3418        |             |             |
| 0-fucosylpeptide | 3-beta-N-acetylglucosaminyltransferase [Source:HGNC Symbol;Acc:HGNC:6560]                          | -           | 484 898     | 1314 260    | 205         |
|                  | 320 7.74404764                                                                                     | 11.58345821 | 17.80843529 |             |             |
| 3.677921927      | 2.613607697                                                                                        | 4.370427858 |             |             |             |
| ENSG00000211459  | 19399.93338                                                                                        | 32750.11076 | 20191.53729 |             |             |
| 56149.89514      | 48453.76456                                                                                        | 54994.18622 | 24113.86048 |             |             |
| 53199.28197      | -1.141494258                                                                                       | 1.05E-10    | 8.17E-09    |             | MT-         |
| RNR1 MT          | 648 1601                                                                                           | +           | 954         |             |             |
| mitochondrially  | encoded 12S RNA [Source:HGNC Symbol;Acc:HGNC:7470]                                                 | -           | 16768 35331 | 20650 55894 | 53021 56047 |
|                  | 961.2306345                                                                                        | 1632.832038 | 1002.707208 | 2832.813819 |             |
| 2421.910765      | 2742.521446                                                                                        |             |             |             |             |
| ENSG00000012048  | 2381.027129                                                                                        | 2055.050679 | 2715.346202 |             |             |
| 1317.002049      | 1128.616949                                                                                        | 1097.980166 | 2383.808003 |             |             |
| 1181.199721      | 1.013065195                                                                                        | 1.21E-10    | 9.37E-09    |             | BRCA1       |
| 17               | 43044295                                                                                           | 43170245    | -           | 9187        |             |
| protein_coding   | "BRCA1, DNA repair associated [Source:HGNC Symbol;Acc:HGNC:1100]"                                  | -           | 2058 2217   | 2777 1311   | 1235        |



|                        |                                     |                                        |             |             |
|------------------------|-------------------------------------|----------------------------------------|-------------|-------------|
| 1119                   | 12.25085407                         | 10.63961553                            | 14.00246898 |             |
| 6.899699743            | 5.858033339                         | 5.685941747                            |             |             |
| ENSG00000258791        | 72.88858557                         | 78.79084697                            | 44.97872714 |             |
| 350.5977995            | 458.7576585                         | 187.4121642                            | 65.5527199  |             |
| 332.2558741            | -2.342630926                        | 1.28E-10                               | 9.82E-09    |             |
| LINC00520              | 14                                  | 55781132                               | 55796731    | -           |
|                        | lincRNA                             | long intergenic non-protein coding RNA | 520         | 3482        |
|                        | [Source:HGNC Symbol;Acc:HGNC:19843] | -                                      | 63          | 85          |
|                        | 349                                 | 502                                    | 191         | 0.989478804 |
| 0.611971956            | 4.846161429                         | 6.282515201                            | 2.560652446 |             |
| ENSG00000102317        | 4408.023984                         | 4142.544648                            | 4479.294544 |             |
| 2310.529911            | 2606.32837                          | 2541.348195                            | 4343.287726 |             |
| 2486.068825            | 0.804788262                         | 1.32E-10                               | 1.01E-08    | RBM3        |
| X                      | 48574449                            | 48579066                               | +           | 3731        |
| protein_coding         | RNA binding motif protein 3         | [Source:HGNC                           |             |             |
| Symbol;Acc:HGNC:9900]  | -                                   | 3810                                   | 4469        | 4581        |
|                        | 2590                                | 55.84630442                            | 52.81035217 | 56.87710703 |
| 29.8060073             | 33.31063179                         | 32.40563611                            |             |             |
| ENSG00000169919        | 970.6908459                         | 928.8050431                            | 1240.82619  |             |
| 472.1517644            | 456.0160788                         | 478.8331735                            | 1046.774026 |             |
| 469.0003389            | 1.158518583                         | 1.55E-10                               | 1.18E-08    | GUSB        |
| 7                      | 65960684                            | 65982314                               | -           | 3992        |
| protein_coding         | glucuronidase beta                  | [Source:HGNC                           |             |             |
| Symbol;Acc:HGNC:4696]  | -                                   | 839                                    | 1002        | 1269        |
|                        | 11.4938663                          | 11.06652188                            | 14.72561851 | 5.692572125 |
| 5.447140919            | 5.706572316                         |                                        |             |             |
| ENSG00000075702        | 1049.36424                          | 1050.235643                            | 1829.460837 |             |
| 533.4310359            | 413.0646646                         | 498.4574839                            | 1309.686906 |             |
| 481.6510615            | 1.443741938                         | 1.73E-10                               | 1.31E-08    | WDR62       |
| 19                     | 36054881                            | 36105106                               | +           | 9812        |
| protein_coding         | WD repeat domain 62                 | [Source:HGNC                           |             |             |
| Symbol;Acc:HGNC:24502] | -                                   | 907                                    | 1133        | 1871        |
|                        | 508                                 | 5.055271213                            | 5.091037878 | 8.833213017 |
| 2.616605187            | 2.007425761                         | 2.416863977                            |             |             |
| ENSG00000197019        | 579.6377995                         | 653.5005543                            | 548.5449115 |             |
| 1229.603744            | 1197.156439                         | 1190.214425                            | 593.8944218 |             |
| 1205.658203            | -1.021118797                        | 1.80E-10                               | 1.36E-08    |             |
| SERTAD1                | 19                                  | 40421592                               | 40426025    | -           |
|                        |                                     |                                        |             | 2114        |
| protein_coding         | SERTA domain containing 1           | [Source:HGNC                           |             |             |
| Symbol;Acc:HGNC:17932] | -                                   | 501                                    | 705         | 561         |
|                        | 1213                                | 12.96067008                            | 14.70341083 | 12.29306942 |
| 27.99481819            | 27.00380172                         | 26.78562928                            |             |             |
| ENSG00000173545        | 1249.51861                          | 1203.182581                            | 924.9973017 |             |
| 2627.976629            | 2188.694406                         | 2156.711712                            | 1125.899497 |             |
| 2324.460916            | -1.046092236                        | 1.85E-10                               | 1.38E-08    | ZNF622      |
| 5                      | 16451519                            | 16465792                               | -           | 1699        |
| protein_coding         | zinc finger protein 622             | [Source:HGNC                           |             |             |
| Symbol;Acc:HGNC:30958] | -                                   | 1080                                   | 1298        | 946         |
|                        | 2198                                | 34.76362763                            | 33.6833495  | 25.79290231 |
| 74.44672155            | 61.42861684                         | 60.3921297                             |             | 2395        |

|                 |                                                                              |                       |                   |        |
|-----------------|------------------------------------------------------------------------------|-----------------------|-------------------|--------|
| ENSG00000142627 | 3033.553514                                                                  | 3398.202882           | 5671.230814       |        |
| 1564.128292     | 1347.943319                                                                  | 1884.915013           | 4034.32907        |        |
| 1598.995541     | 1.335395386                                                                  | 1.88E-10              | 1.41E-08          | EPHA2  |
| 1               | 16124337                                                                     | 16156087              | - 4159            |        |
| protein_coding  | EPH receptor A2 [Source:HGNC Symbol;Acc:HGNC:3386]                           |                       |                   |        |
| -               | 2622 3666                                                                    | 5800 1557             | 1475 1921         |        |
| 34.47771535     | 38.8631052                                                                   | 64.60134037           | 18.10093083       |        |
| 15.4547398      | 21.56177354                                                                  |                       |                   |        |
| ENSG00000158109 | 1367.528701                                                                  | 1512.784262           | 1045.266507       |        |
| 2481.308208     | 2760.77069                                                                   | 2767.027765           | 1308.52649        |        |
| 2669.702221     | -1.028775149                                                                 | 2.11E-10              | 1.57E-08          | TPRG1L |
| 1               | 3625002 3630127 +                                                            | 2414                  | protein_coding    | tumor  |
| protein         | p63 regulated 1 like [Source:HGNC Symbol;Acc:HGNC:27007]                     |                       |                   |        |
| -               | 1182 1632                                                                    | 1069 2470             | 3021 2820         |        |
| 26.77780185     | 29.80690248                                                                  | 20.51364782           | 49.47216359       |        |
| 54.53459061     | 54.53281019                                                                  |                       |                   |        |
| ENSG00000103187 | 4667.1834                                                                    | 5583.953672           | 6696.941352       |        |
| 2245.232326     | 2446.402892                                                                  | 3255.673094           | 5649.359475       |        |
| 2649.102771     | 1.09271859                                                                   | 2.34E-10              | 1.72E-08          | COTL1  |
| 16              | 84565594                                                                     | 84618077              | - 6762            |        |
| protein_coding  | coactosin like F-actin binding protein 1 [Source:HGNC Symbol;Acc:HGNC:18304] |                       |                   |        |
| -               | 3318                                                                         | 4034 6024             | 6849 2235 2677    |        |
| 15.98098624     | 32.62536959                                                                  | 39.27749253           | 46.9196167        |        |
| 15.98098624     | 17.25169623                                                                  | 22.90589424           |                   |        |
| ENSG00000196262 | 29628.63155                                                                  | 26976.1321            | 31622.97858       |        |
| 15273.60729     | 18203.1749                                                                   | 17648.14233           | 29409.24741       |        |
| 17041.64151     | 0.787179585                                                                  | 2.53E-10              | 1.86E-08          | PPIA   |
| 7               | 44796680                                                                     | 44824564              | + 4432            |        |
| protein_coding  | peptidylprolyl isomerase A [Source:HGNC Symbol;Acc:HGNC:9253]                |                       |                   |        |
| -               | 17986                                                                        | 25609 29102           | 32341 15204 19919 |        |
| 165.8667464     | 316.0003627                                                                  | 289.5056492           | 338.0307029       |        |
| 165.8667464     | 195.8512635                                                                  | 189.4440079           |                   |        |
| ENSG00000205336 | 327.4201542                                                                  | 118.649746            | 267.916766        |        |
| 44.20144177     | 31.07123583                                                                  | 43.17348286           | 237.9955554       |        |
| 39.48205349     | 2.591576054                                                                  | 2.74E-10              | 2.00E-08          | ADGRG1 |
| 16              | 57610652                                                                     | 57665580              | + 8659            |        |
| protein_coding  | adhesion Gprotein-coupled receptor G1 [Source:HGNC Symbol;Acc:HGNC:4512]     |                       |                   |        |
| -               | 44                                                                           | 283 128               | 274 44 34         |        |
| 0.245689249     | 1.787365655                                                                  | 0.651742719           | 1.465835647       |        |
| 0.245689249     | 0.171107787                                                                  | 0.237208896           |                   |        |
| ENSG00000117632 | 8978.022604                                                                  | 11194.78893           | 12492.35256       |        |
| 4616.03693      | 6213.333307                                                                  | 5698.899737           | 10888.38803       |        |
| 5509.423325     | 0.982838363                                                                  | 2.92E-10              | 2.13E-08          | STMN1  |
| 1               | 25884181                                                                     | 25906991              | - 6261            |        |
| protein_coding  | stathmin 1 [Source:HGNC Symbol;Acc:HGNC:6510]                                |                       |                   |        |
| -               | 7760                                                                         | 12077 12776 4595 6799 | 5808 67.78174265  |        |
| 85.04510477     | 94.52651685                                                                  | 35.48485447           | 47.32165611       |        |
| 43.3040923      |                                                                              |                       |                   |        |
| ENSG00000040275 | 1512.14891                                                                   | 1176.300998           | 1406.074122       |        |
| 714.2551159     | 643.3573537                                                                  | 611.2972686           | 1364.841343       |        |

|                                                    |                                                      |             |                |       |
|----------------------------------------------------|------------------------------------------------------|-------------|----------------|-------|
| 656.3032461                                        | 1.055952183                                          | 2.96E-10    | 2.15E-08       | SPDL1 |
| 5                                                  | 169583634                                            | 169604778   | + 4777         |       |
| protein_coding                                     | spindle apparatus coiled-coil protein 1 [Source:HGNC |             |                |       |
| Symbol;Acc:HGNC:26010]                             | -                                                    | 1307 1269   | 1438 711       | 704   |
| 623                                                | 14.96287539                                          | 11.71225013 | 13.94460127    |       |
| 7.196404657                                        | 6.4220845                                            | 6.088058841 |                |       |
| ENSG00000140451                                    | 179.3290597                                          | 283.6470491 | 484.010216     |       |
| 40.18312888                                        | 44.77913399                                          | 82.42210364 | 315.6621083    |       |
| 55.79478884                                        | 2.501694993                                          | 3.08E-10    | 2.22E-08       | PIF1  |
| 15                                                 | 64815632                                             | 64825668    | - 4656         |       |
| protein_coding                                     | PIF1 5'-to-3' DNA helicase [Source:HGNC              |             |                |       |
| Symbol;Acc:HGNC:26220]                             | -                                                    | 155 306     | 495 40         | 49    |
| 84                                                 | 1.820595392                                          | 2.897626554 | 4.924869002    |       |
| 0.415382539                                        | 0.458608084                                          | 0.842194402 |                |       |
| ENSG00000164032                                    | 6050.909564                                          | 7099.518788 | 7492.869263    |       |
| 3600.408348                                        | 3732.203739                                          | 4180.959328 | 6881.099205    |       |
| 3837.857139                                        | 0.842467997                                          | 3.09E-10    | 2.22E-08       | H2AFZ |
| 4                                                  | 99948086                                             | 99950388    | - 2303         |       |
| protein_coding                                     | H2A histone family member Z [Source:HGNC             |             |                |       |
| Symbol;Acc:HGNC:4741]                              | -                                                    | 5230 7659   | 7663 3584      | 4084  |
| 4261                                               | 124.1945287                                          | 146.6263722 | 154.1371567    |       |
| 75.2445899                                         | 77.2770248                                           | 86.37014169 |                |       |
| ENSG00000224051                                    | 923.2554172                                          | 1649.04608  | 1297.538498    |       |
| 3116.201645                                        | 2861.295276                                          | 2783.708429 | 1289.946665    |       |
| 2920.401783                                        | -1.177887732                                         | 3.22E-10    | 2.30E-08       | CPTP  |
| 1                                                  | 1324756 1328897                                      | + 2556      | protein_coding |       |
| ceramide-1-phosphate transfer protein [Source:HGNC |                                                      |             |                |       |
| Symbol;Acc:HGNC:28116]                             | -                                                    | 798 1779    | 1327 3102      | 3131  |
| 2837                                               | 17.07405809                                          | 30.68662008 | 24.0498587     |       |
| 58.67892656                                        | 53.38027611                                          | 51.81368997 |                |       |
| ENSG00000160049                                    | 2201.698069                                          | 2239.513956 | 1833.37203     |       |
| 4369.915266                                        | 4043.829958                                          | 3455.84106  | 2091.528018    |       |
| 3956.528761                                        | -0.919756118                                         | 3.32E-10    | 2.36E-08       | DFFA  |
| 1                                                  | 10456522                                             | 10472526    | - 6622         |       |
| protein_coding                                     | DNA fragmentation factor subunit alpha [Source:HGNC  |             |                |       |
| Symbol;Acc:HGNC:2772]                              | -                                                    | 1903 2416   | 1875 4350      | 4425  |
| 3522                                               | 15.71608339                                          | 16.0857647  | 13.11639695    |       |
| 31.76152138                                        | 29.11941838                                          | 24.82825579 |                |       |
| ENSG00000148082                                    | 999.6148878                                          | 875.9688281 | 634.5911721    |       |
| 1785.135501                                        | 1815.839576                                          | 1841.74153  | 836.7249627    |       |
| 1814.238869                                        | -1.117342679                                         | 3.76E-10    | 2.66E-08       | SHC3  |
| 9                                                  | 89005771                                             | 89178767    | - 9929         |       |
| protein_coding                                     | SHC adaptor protein 3 [Source:HGNC                   |             |                |       |
| Symbol;Acc:HGNC:18181]                             | -                                                    | 864 945     | 649 1777       | 1987  |
| 1877                                               | 4.758860175                                          | 4.196239386 | 3.027900794    |       |
| 8.65332736                                         | 8.720692119                                          | 8.8247985   |                |       |
| ENSG00000128708                                    | 2082.531016                                          | 1801.066067 | 1864.66158     |       |
| 1093.985684                                        | 947.6726929                                          | 996.9149678 | 1916.086221    |       |
| 1012.857781                                        | 0.919613719                                          | 3.82E-10    | 2.69E-08       | HAT1  |
| 2                                                  | 171922448                                            | 171983682   | + 6790         |       |

|                                      |                                                        |             |             |             |       |        |
|--------------------------------------|--------------------------------------------------------|-------------|-------------|-------------|-------|--------|
| protein_coding                       | histone acetyltransferase 1 [Source:HGNC               |             |             |             |       |        |
| Symbol;Acc:HGNC:4821]                | -                                                      | 1800        | 1943        | 1907        | 1089  | 1037   |
| 1016                                 | 14.49764441                                            | 12.61644458 |             | 13.01018208 |       |        |
| 7.754598592                          | 6.655299126                                            | 6.985057242 |             |             |       |        |
| ENSG00000152253                      | 354.0302728                                            | 427.3244759 |             | 617.968599  |       |        |
| 72.32963199                          | 166.3224977                                            | 113.8210003 |             | 466.4411159 |       |        |
| 117.4910433                          | 1.987725574                                            | 4.33E-10    |             | 3.03E-08    |       | SPC25  |
| 2                                    | 168834132                                              | 168913371   |             | -           | 1841  |        |
| protein_coding                       | "SPC25, NDC80 kinetochore complex component            |             |             |             |       |        |
| [Source:HGNC Symbol;Acc:HGNC:24031]" | -                                                      |             |             | 306         | 461   | 632    |
| 72                                   | 182                                                    | 116         | 9.089967924 | 11.0403056  |       |        |
| 15.9025125                           | 1.890949473                                            |             | 4.308004986 | 2.941373914 |       |        |
| ENSG00000124207                      | 9283.460486                                            |             | 7664.958984 | 8040.436376 |       |        |
| 4187.082029                          | 5182.499365                                            |             | 4517.516252 | 8329.618615 |       |        |
| 4629.032549                          | 0.847352301                                            |             | 4.34E-10    | 3.03E-08    |       | CSE1L  |
| 20                                   | 49046246                                               |             | 49096960    | +           | 3800  |        |
| protein_coding                       | chromosome segregation 1 like [Source:HGNC             |             |             |             |       |        |
| Symbol;Acc:HGNC:2431]                | -                                                      | 8024        | 8269        | 8223        | 4168  | 5671   |
| 4604                                 | 115.4787399                                            |             | 95.94080393 | 100.2418676 |       |        |
| 53.03289437                          | 65.03312874                                            |             | 56.55848323 |             |       |        |
| ENSG00000174371                      | 1747.01213                                             |             | 1525.761578 | 1745.370173 |       |        |
| 517.3577843                          | 838.9233675                                            |             | 820.2961743 | 1672.714627 |       |        |
| 725.5257754                          | 1.20453963                                             |             | 4.65E-10    | 3.23E-08    |       | EX01   |
| 1                                    | 241847967                                              |             | 241895148   | +           | 4140  |        |
| protein_coding                       | exonuclease 1 [Source:HGNC Symbol;Acc:HGNC:3511]       |             |             |             |       |        |
| -                                    | 1510                                                   | 1646        | 1785        | 515         | 918   | 836    |
| 19.94671208                          | 17.52925455                                            |             | 19.97286356 | 6.014618758 |       |        |
| 9.662754326                          | 9.426532564                                            |             |             |             |       |        |
| ENSG00000114268                      | 1056.30601                                             |             | 613.6416552 | 1012.999159 |       |        |
| 328.4970786                          | 319.8509571                                            |             | 365.0121732 | 894.3156081 |       |        |
| 337.7867363                          | 1.404055829                                            |             | 4.84E-10    | 3.35E-08    |       | PFKFB4 |
| 3                                    | 48517684                                               |             | 48562015    | -           | 6107  |        |
| protein_coding                       | "6-phosphofructo-2-kinase/fructose-2,6-biphosphatase 4 |             |             |             |       |        |
| [Source:HGNC Symbol;Acc:HGNC:8875]"  | -                                                      |             |             | 913         | 662   | 1036   |
| 327                                  | 350                                                    | 372         | 8.175937639 | 4.779297085 |       |        |
| 7.858402898                          | 2.588934418                                            |             | 2.49746104  | 2.843551222 |       |        |
| ENSG00000136869                      | 513.690984                                             |             | 293.8435116 | 549.5227099 |       |        |
| 111.5081826                          | 148.95916                                              |             | 134.4265262 | 452.3524018 |       |        |
| 131.6312896                          | 1.779409261                                            |             | 4.86E-10    | 3.35E-08    |       | TLR4   |
| 9                                    | 117704175                                              |             | 117724730   | +           | 13272 |        |
| protein_coding                       | toll like receptor 4 [Source:HGNC                      |             |             |             |       |        |
| Symbol;Acc:HGNC:11850]               | -                                                      | 444         | 317         | 562         | 111   | 163    |
| 137                                  | 1.829537476                                            |             | 1.053069046 | 1.96156362  |       |        |
| 0.404378281                          | 0.535192266                                            |             | 0.481870378 |             |       |        |
| ENSG00000168461                      | 6136.524728                                            |             | 4347.400851 | 4822.501789 |       |        |
| 2668.159758                          | 2832.96562                                             |             | 2410.846531 | 5102.142456 |       |        |
| 2637.32397                           | 0.951731433                                            |             | 5.00E-10    | 3.43E-08    |       | RAB31  |
| 18                                   | 9708165                                                | 9862551     | +           | 5586        |       |        |
| protein_coding                       | "RAB31, member RAS oncogene family [Source:HGNC        |             |             |             |       |        |
| Symbol;Acc:HGNC:9771]"               | -                                                      | 5304        | 4690        | 4932        | 2656  | 3100   |

|                                  |                                                   |             |                 |         |
|----------------------------------|---------------------------------------------------|-------------|-----------------|---------|
| 2457                             | 51.92748593                                       | 37.01739638 | 40.90012096     |         |
| 22.98943806                      | 24.18351142                                       | 20.53289853 |                 |         |
| ENSG00000168159                  | 2008.485469                                       | 2790.122934 | 2256.758745     |         |
| 4556.766815                      | 4195.530697                                       | 4581.29526  | 2351.789049     |         |
| 4444.530924                      | -0.917785785                                      | 5.85E-10    | 3.99E-08        | RNF187  |
| 1                                | 228487061                                         | 228495766   | + 3285          |         |
| protein_coding                   | ring finger protein 187 [Source:HGNC              |             |                 |         |
| Symbol;Acc:HGNC:27146]           | -                                                 | 1736 3010   | 2308 4536       | 4591    |
| 4669                             | 28.90074644                                       | 40.39848508 | 32.54639466     |         |
| 66.7634681                       | 60.90185439                                       | 66.34902356 |                 |         |
| ENSG00000133216                  | 1403.394513                                       | 1065.066861 | 1486.253593     |         |
| 680.0994563                      | 359.1469318                                       | 441.5469838 | 1318.238322     |         |
| 493.5977906                      | 1.41768338                                        | 6.20E-10    | 4.21E-08        | EPHB2   |
| 1                                | 22710839                                          | 22921500    | + 12516         |         |
| protein_coding                   | EPH receptor B2 [Source:HGNC                      |             |                 |         |
| Symbol;Acc:HGNC:3393]            | -                                                 | 1213 1149   | 1520 677        | 393 450 |
| 5.300171947                      | 4.047514676                                       | 5.625750783 | 2.615316963     |         |
| 1.368313443                      | 1.678390432                                       |             |                 |         |
| ENSG00000138448                  | 1993.444967                                       | 1430.28561  | 2117.911369     |         |
| 960.3767803                      | 520.9001301                                       | 684.8884326 | 1847.213982     |         |
| 722.0551143                      | 1.355478559                                       | 6.28E-10    | 4.25E-08        | ITGAV   |
| 2                                | 186590065                                         | 186680901   | + 8211          |         |
| protein_coding                   | integrin subunit alpha V [Source:HGNC             |             |                 |         |
| Symbol;Acc:HGNC:6150]            | -                                                 | 1723 1543   | 2166 956        | 570     |
| 698                              | 11.47582556                                       | 8.285215937 | 12.21982133     |         |
| 5.629412286                      | 3.02508374                                        | 3.968308309 |                 |         |
| ENSG00000124496                  | 892.017452                                        | 800.8857857 | 1228.114811     |         |
| 441.0098395                      | 376.5102695                                       | 401.3171475 | 973.6726828     |         |
| 406.2790855                      | 1.261332689                                       | 6.40E-10    | 4.31E-08        | TRERF1  |
| 6                                | 42224931                                          | 42452051    | - 7732          |         |
| protein_coding                   | transcriptional regulating factor 1 [Source:HGNC  |             |                 |         |
| Symbol;Acc:HGNC:18273]           | zf-C2H2                                           | 771 864     | 1256 439        | 412     |
| 409                              | 5.453273071                                       | 4.926697021 | 7.524891631     |         |
| 2.745199375                      | 2.322009373                                       | 2.469320708 |                 |         |
| ENSG00000186871                  | 821.4427898                                       | 761.0268866 | 1035.488523     |         |
| 333.5199697                      | 421.2894035                                       | 364.0309577 | 872.652733      |         |
| 372.946777                       | 1.226019071                                       | 6.53E-10    | 4.37E-08        | ERCC6L  |
| X                                | 72204657                                          | 72239047    | - 4364          |         |
| protein_coding                   | "ERCC excision repair 6 like, spindle assembly    |             |                 |         |
| checkpoint helicase [Source:HGNC | Symbol;Acc:HGNC:20794]"                           |             |                 | -       |
| 710                              | 821 1059                                          | 332 461     | 371 8.897506615 |         |
| 8.294541286                      | 11.24122587                                       | 3.67836277  | 4.60335832      |         |
| 3.968580586                      |                                                   |             |                 |         |
| ENSG00000124762                  | 1035.4807                                         | 1584.1595   | 789.0833218     |         |
| 2638.022411                      | 3370.315228                                       | 2555.085213 | 1136.241174     |         |
| 2854.474284                      | -1.328574692                                      | 6.54E-10    | 4.37E-08        | CDKN1A  |
| 6                                | 36676460                                          | 36687339    | + 3050          |         |
| protein_coding                   | cyclin dependent kinase inhibitor 1A [Source:HGNC |             |                 |         |
| Symbol;Acc:HGNC:1784]            | -                                                 | 895 1709    | 807 2626        | 3688    |
| 2604                             | 16.04788889                                       | 24.70450642 | 12.25677323     |         |

|                            |                                                 |             |                  |  |  |             |
|----------------------------|-------------------------------------------------|-------------|------------------|--|--|-------------|
| 41.62901154                | 52.69260514                                     | 39.85540038 |                  |  |  |             |
| ENSG00000121957            | 1583.880534                                     | 1411.746588 | 1750.259165      |  |  |             |
| 699.1864425                | 857.200565                                      | 814.4088812 | 1581.962095      |  |  |             |
| 790.2652962                | 1.000947328                                     | 6.78E-10    | 4.51E-08         |  |  | GPSM2       |
| 1                          | 108875350                                       | 108934545   | + 9130           |  |  |             |
| protein_coding             | G protein signaling modulator 2 [Source:HGNC    |             |                  |  |  |             |
| Symbol;Acc:HGNC:29501]     | -                                               | 1369 1523   | 1790 696         |  |  | 938         |
| 830                        | 8.200255485                                     | 7.354668185 | 9.082067163      |  |  |             |
| 3.685867156                | 4.477036742                                     | 4.243784778 |                  |  |  |             |
| ENSG00000100234            | 6404.939837                                     | 6280.093979 | 7077.304936      |  |  |             |
| 2893.185279                | 3592.383178                                     | 4073.025621 | 6587.446251      |  |  |             |
| 3519.53136                 | 0.904299373                                     | 7.35E-10    | 4.87E-08         |  |  | TIMP3       |
| 22                         | 32801701                                        | 32863043    | + 4603           |  |  |             |
| protein_coding             | TIMP metalloproteinase inhibitor 3 [Source:HGNC |             |                  |  |  |             |
| Symbol;Acc:HGNC:11822]     | -                                               | 5536 6775   | 7238 2880        |  |  | 3931        |
| 4151                       | 65.77332837                                     | 64.89366203 | 72.84169778      |  |  |             |
| 30.2519051                 | 37.21522651                                     | 42.09764431 |                  |  |  |             |
| ENSG00000167703            | 89.08604903                                     | 64.88657986 | 111.4690194      |  |  |             |
| 1.004578222                | 9.138598774                                     | 1.962431039 | 88.48054944      |  |  |             |
| 4.035202678                | 4.429481469                                     | 7.62E-10    | 5.02E-08         |  |  |             |
| SLC43A2 17                 | 1569267 1628886                                 | - 10606     | protein_coding   |  |  | solute      |
| carrier family 43 member 2 | [Source:HGNC Symbol;Acc:HGNC:23087]             |             |                  |  |  | -           |
| 77                         | 70 114                                          | 1 10        | 2                |  |  | 0.397039591 |
| 0.290991548                | 0.497915544                                     | 0.00455879  | 0.041087241      |  |  |             |
| 0.008802872                |                                                 |             |                  |  |  |             |
| ENSG00000082781            | 4344.391092                                     | 3718.927977 | 5010.239084      |  |  |             |
| 2371.809182                | 2065.323323                                     | 2481.494049 | 4357.852718      |  |  |             |
| 2306.208851                | 0.91814583                                      | 7.65E-10    | 5.02E-08         |  |  | ITGB5       |
| 3                          | 124761948                                       | 124901418   | - 6447           |  |  |             |
| protein_coding             | integrin subunit beta 5 [Source:HGNC            |             |                  |  |  |             |
| Symbol;Acc:HGNC:6160]      | -                                               | 3755 4012   | 5124 2361        |  |  | 2260        |
| 2529                       | 31.85275373                                     | 27.4370372  | 36.81746704      |  |  |             |
| 17.70677763                | 15.27599004                                     | 18.31205968 |                  |  |  |             |
| ENSG00000138758            | 5622.833744                                     | 4721.889111 | 5816.922778      |  |  |             |
| 2827.887695                | 3317.311355                                     | 2801.370308 | 5387.215211      |  |  |             |
| 2982.189786                | 0.852974977                                     | 8.15E-10    | 5.32E-08         |  |  | 11-Sep      |
| 4                          | 76949703                                        | 77040384    | + 9787           |  |  |             |
| protein_coding             | septin 11 [Source:HGNC Symbol;Acc:HGNC:25589]   |             |                  |  |  | -           |
| 4860                       | 5094 5949                                       | 2815 3630   | 2855 27.15697507 |  |  |             |
| 22.94791911                | 28.15767788                                     | 13.90689025 | 16.1627641       |  |  |             |
| 13.6176623                 |                                                 |             |                  |  |  |             |
| ENSG00000103995            | 704.5896605                                     | 640.5232383 | 754.8603773      |  |  |             |
| 180.82408                  | 321.6786769                                     | 273.7591299 | 699.991092       |  |  |             |
| 258.7539622                | 1.434583693                                     | 8.62E-10    | 5.61E-08         |  |  | CEP152      |
| 15                         | 48712928                                        | 48811146    | - 8168           |  |  |             |
| protein_coding             | centrosomal protein 152 [Source:HGNC            |             |                  |  |  |             |
| Symbol;Acc:HGNC:29298]     | -                                               | 609 691     | 772 180          |  |  | 352         |
| 279                        | 4.077521656                                     | 3.729892166 | 4.378284989      |  |  |             |
| 1.065511135                | 1.877956517                                     | 1.594536665 |                  |  |  |             |
| ENSG00000100065            | 258.0024537                                     | 260.4732706 | 359.8298171      |  |  |             |

|                                                       |                                                        |             |                |        |
|-------------------------------------------------------|--------------------------------------------------------|-------------|----------------|--------|
| 82.37541421                                           | 95.04142725                                            | 73.59116396 | 292.7685138    |        |
| 83.66933514                                           | 1.806599592                                            | 9.43E-10    | 6.11E-08       | CARD10 |
| 22                                                    | 37490362                                               | 37519542    | - 5652         |        |
| protein_coding                                        | caspase recruitment domain family member 10            |             |                |        |
| [Source:HGNC Symbol;Acc:HGNC:16422]                   | -                                                      | 223         | 281            | 368    |
| 82                                                    | 104 75                                                 | 2.157731604 | 2.19198776     |        |
| 3.016116561                                           | 0.70147616                                             | 0.801843815 | 0.619448415    |        |
| ENSG00000081923                                       | 424.604935                                             | 312.3825345 | 440.9870857    |        |
| 74.33878843                                           | 97.78300688                                            | 152.0884055 | 392.658185     |        |
| 108.0700669                                           | 1.860774036                                            | 9.59E-10    | 6.19E-08       | ATP8B1 |
| 18                                                    | 57646426                                               | 57803315    | - 7028         |        |
| protein_coding                                        | ATPase phospholipid transporting 8B1 [Source:HGNC      |             |                |        |
| Symbol;Acc:HGNC:3706]                                 | -                                                      | 367 337     | 451 74         | 107    |
| 155                                                   | 2.85580812                                             | 2.11413203  | 2.972673728    |        |
| 0.509097757                                           | 0.663453703                                            | 1.029546535 |                |        |
| ENSG00000197461                                       | 1163.903446                                            | 1403.404027 | 1898.884524    |        |
| 514.3440497                                           | 700.930526                                             | 666.2453377 | 1488.730666    |        |
| 627.1733045                                           | 1.247234671                                            | 1.03E-09    | 6.59E-08       | PDGFA  |
| 7                                                     | 497258 520296                                          | - 4151      | protein_coding |        |
| platelet derived growth factor subunit A [Source:HGNC |                                                        |             |                |        |
| Symbol;Acc:HGNC:8799]                                 | -                                                      | 1006 1514   | 1942 512       | 767    |
| 679                                                   | 13.25378618                                            | 16.0807796  | 21.6719978     |        |
| 5.963736467                                           | 8.051952946                                            | 7.635950013 |                |        |
| ENSG00000102384                                       | 815.6579814                                            | 583.9792187 | 996.3765861    |        |
| 352.6069559                                           | 284.2104219                                            | 264.9281903 | 798.6712621    |        |
| 300.581856                                            | 1.409874648                                            | 1.14E-09    | 7.28E-08       | CENPI  |
| X                                                     | 101098218                                              | 101163681   | + 4321         |        |
| protein_coding                                        | centromere protein I [Source:HGNC                      |             |                |        |
| Symbol;Acc:HGNC:3968]                                 | -                                                      | 705 630     | 1019 351       | 311    |
| 270                                                   | 8.922767226                                            | 6.428212739 | 10.92426869    |        |
| 3.927571199                                           | 3.136423654                                            | 2.91692682  |                |        |
| ENSG00000167106                                       | 391.0530464                                            | 532.996906  | 412.6309316    |        |
| 900.1020869                                           | 986.0548077                                            | 1089.149227 | 445.5602947    |        |
| 991.7687071                                           | -1.15312279                                            | 1.14E-09    | 7.28E-08       |        |
| FAM102A 9                                             | 127940579                                              | 127980513   | - 6100         |        |
| protein_coding                                        | family with sequence similarity 102 member A           |             |                |        |
| [Source:HGNC Symbol;Acc:HGNC:31419]                   | -                                                      | 338         | 575            | 422    |
| 896                                                   | 1079 1110                                              | 3.030271756 | 4.155965825    |        |
| 3.204682965                                           | 7.10197912                                             | 7.708150888 | 8.49452658     |        |
| ENSG00000164932                                       | 851.5237933                                            | 786.0545674 | 933.7974874    |        |
| 233.0621475                                           | 323.5063966                                            | 428.791182  | 857.1252827    |        |
| 328.453242                                            | 1.383550232                                            | 1.17E-09    | 7.43E-08       | CTHRC1 |
| 8                                                     | 103371515                                              | 103382997   | + 1776         |        |
| protein_coding                                        | collagen triple helix repeat containing 1 [Source:HGNC |             |                |        |
| Symbol;Acc:HGNC:18831]                                | -                                                      | 736 848     | 955 232        | 354    |
| 437                                                   | 22.66363492                                            | 21.05168431 | 24.90937702    |        |
| 6.316059898                                           | 8.685981466                                            | 11.48641522 |                |        |
| ENSG00000083720                                       | 1055.149048                                            | 967.736991  | 1224.203617    |        |
| 538.453927                                            | 357.3192121                                            | 506.307208  | 1082.363219    |        |
| 467.3601157                                           | 1.212246783                                            | 1.27E-09    | 8.04E-08       | OXCT1  |

|                        |                                                  |             |      |             |       |        |
|------------------------|--------------------------------------------------|-------------|------|-------------|-------|--------|
| 5                      | 41730065                                         | 41870519    | -    | 4194        |       |        |
| protein_coding         | 3-oxoacid CoA-transferase 1 [Source:HGNC         |             |      |             |       |        |
| Symbol;Acc:HGNC:8527]  | -                                                | 912         | 1044 | 1252        | 536   | 391    |
| 516                    | 11.89217044                                      | 10.97503795 |      | 13.82860458 |       |        |
| 6.179275807            | 4.062626799                                      | 5.743376824 |      |             |       |        |
| ENSG00000124795        | 7212.499086                                      | 5302.160526 |      | 5881.457473 |       |        |
| 3327.163071            | 3490.944732                                      | 3332.207904 |      | 6132.039028 |       |        |
| 3383.438569            | 0.857641527                                      | 1.30E-09    |      | 8.21E-08    |       | DEK    |
| 6                      | 18223868                                         | 18264823    |      | -           | 4361  |        |
| protein_coding         | DEK proto-oncogene [Source:HGNC                  |             |      |             |       |        |
| Symbol;Acc:HGNC:2768]  | 6234                                             | 5720        | 6015 | 3312        | 3820  | 3396   |
| 78.17635618            | 57.82876268                                      | 63.89281177 |      | 36.72023551 |       |        |
| 38.17120534            | 36.35194317                                      |             |      |             |       |        |
| ENSG00000166833        | 1499.422332                                      | 1191.132216 |      | 1958.530228 |       |        |
| 710.236803             | 425.8587029                                      | 678.019924  |      | 1549.694925 |       |        |
| 604.7051433            | 1.358149842                                      | 1.34E-09    |      | 8.37E-08    |       | NAV2   |
| 11                     | 19350724                                         | 20121598    |      | +           | 14673 |        |
| protein_coding         | neuron navigator 2 [Source:HGNC                  |             |      |             |       |        |
| Symbol;Acc:HGNC:15997] | 1296                                             | 1285        | 2003 | 707         | 466   | 691    |
| 4.83037443             | 3.861163287                                      | 6.323601409 |      | 2.329709189 |       |        |
| 1.383966561            | 2.198392155                                      |             |      |             |       |        |
| ENSG00000132780        | 6654.843559                                      | 6141.051308 |      | 6178.708192 |       |        |
| 3886.713141            | 3636.248452                                      | 3991.584733 |      | 6324.867686 |       |        |
| 3838.182109            | 0.720578202                                      | 1.51E-09    |      | 9.43E-08    |       | NASP   |
| 1                      | 45583846                                         | 45618904    |      | +           | 8304  |        |
| protein_coding         | nuclear autoantigenic sperm protein [Source:HGNC |             |      |             |       |        |
| Symbol;Acc:HGNC:7644]  | -                                                | 5752        | 6625 | 6319        | 3869  | 3979   |
| 4068                   | 37.88141994                                      | 35.17486992 |      | 35.25035302 |       |        |
| 22.52747963            | 20.88070686                                      | 22.86860323 |      |             |       |        |
| ENSG00000178202        | 3957.965893                                      | 3134.948758 |      | 3770.390693 |       |        |
| 2014.179335            | 1571.838989                                      | 2073.308393 |      | 3621.101781 |       |        |
| 1886.442239            | 0.940766842                                      | 1.57E-09    |      | 9.77E-08    |       | KDELC2 |
| 11                     | 108472105                                        | 108498432   |      | -           | 4993  |        |
| protein_coding         | KDEL motif containing 2 [Source:HGNC             |             |      |             |       |        |
| Symbol;Acc:HGNC:28496] | -                                                | 3421        | 3382 | 3856        | 2005  | 1720   |
| 2113                   | 37.47021809                                      | 29.86386373 |      | 35.7748577  |       |        |
| 19.41574357            | 15.01154798                                      | 19.75531536 |      |             |       |        |
| ENSG00000134508        | 385.268238                                       | 535.7777594 |      | 782.2387329 |       |        |
| 211.9660048            | 125.1988032                                      | 171.7127159 |      | 567.7615768 |       |        |
| 169.6258413            | 1.744788096                                      | 1.68E-09    |      | 1.04E-07    |       |        |
| CABLES1 18             | 23134564                                         | 23260467    |      | +           | 6654  |        |
| protein_coding         | Cdk5 and Abl enzyme substrate 1 [Source:HGNC     |             |      |             |       |        |
| Symbol;Acc:HGNC:25097] | -                                                | 333         | 578  | 800         | 211   | 137    |
| 175                    | 2.736882481                                      | 3.829825618 |      | 5.569415848 |       |        |
| 1.533207289            | 0.897214675                                      | 1.227725533 |      |             |       |        |
| ENSG00000225614        | 695.3339671                                      | 494.9919092 |      | 1284.827119 |       |        |
| 241.0987733            | 245.828307                                       | 261.9845437 |      | 825.0509984 |       |        |
| 249.637208             | 1.724735117                                      | 1.69E-09    |      | 1.04E-07    |       | ZNF469 |
| 16                     | 88427471                                         | 88440757    |      | +           | 13287 |        |
| protein_coding         | zinc finger protein 469 [Source:HGNC             |             |      |             |       |        |



|                                                                      |                                             |                       |             |      |      |                |
|----------------------------------------------------------------------|---------------------------------------------|-----------------------|-------------|------|------|----------------|
| Symbol;Acc:HGNC:23216]                                               | zf-C2H2                                     | 601                   | 534         | 1314 | 240  | 269            |
| 267                                                                  | 2.473672778                                 | 1.771937013           | 4.581111751 |      |      |                |
| 0.873344367                                                          | 0.882234309                                 | 0.938059449           |             |      |      |                |
| ENSG00000178773                                                      | 2.313923351                                 | 8.342560268           | 1.955596832 |      |      |                |
| 40.18312888                                                          | 119.7156439                                 | 113.8210003           | 4.204026817 |      |      |                |
| 91.23992436                                                          | -4.411598298                                | 1.75E-09              | 1.07E-07    |      |      | CPNE7          |
| 16                                                                   | 89575768                                    | 89597246              | +           | 3048 |      |                |
| protein_coding                                                       | copine 7 [Source:HGNC                       | Symbol;Acc:HGNC:2320] |             |      |      | -              |
| 2                                                                    | 9                                           | 2                     | 40          | 131  | 116  | 0.035884735    |
| 0.130185167                                                          | 0.030396074                                 | 0.634521358           | 1.872901471 |      |      |                |
| 1.776597564                                                          |                                             |                       |             |      |      |                |
| ENSG00000129534                                                      | 957.9642675                                 | 764.7346912           | 1029.621732 |      |      |                |
| 386.7626155                                                          | 462.413098                                  | 317.9138283           | 917.4402303 |      |      |                |
| 389.0298473                                                          | 1.236933985                                 | 1.80E-09              | 1.10E-07    |      |      |                |
| MIS18BP1                                                             | 14                                          | 45203190              | 45253540    | -    |      | 6250           |
| protein_coding                                                       | MIS18 binding protein 1 [Source:HGNC        |                       |             |      |      |                |
| Symbol;Acc:HGNC:20190]                                               | -                                           | 828                   | 825         | 1053 | 385  | 506            |
| 324                                                                  | 7.24511081                                  | 5.819797708           | 7.804602876 |      |      |                |
| 2.978392494                                                          | 3.528004231                                 | 2.419975832           |             |      |      |                |
| ENSG00000228253                                                      | 753.1820509                                 | 1038.185278           | 1002.243377 |      |      |                |
| 1852.442241                                                          | 1930.985921                                 | 1754.413349           | 931.2035684 |      |      |                |
| 1845.94717                                                           | -0.986188016                                | 1.88E-09              | 1.15E-07    |      |      | MT-            |
| ATP8                                                                 | MT                                          | 8366                  | 8572        | +    | 207  | protein_coding |
| mitochondrially encoded ATP synthase membrane subunit 8 [Source:HGNC |                                             |                       |             |      |      |                |
| Symbol;Acc:HGNC:7415]                                                | -                                           | 651                   | 1120        | 1025 | 1844 | 2113           |
| 1788                                                                 | 171.9908552                                 | 238.5512163           | 229.3802257 |      |      |                |
| 430.7167763                                                          | 444.823527                                  | 403.221058            |             |      |      |                |
| ENSG00000079616                                                      | 1389.510973                                 | 1426.577806           | 1849.016805 |      |      |                |
| 720.2825852                                                          | 665.2899908                                 | 852.6762864           | 1555.035194 |      |      |                |
| 746.0829541                                                          | 1.059929681                                 | 1.94E-09              | 1.18E-07    |      |      | KIF22          |
| 16                                                                   | 29790719                                    | 29805385              | +           | 4312 |      |                |
| protein_coding                                                       | kinesin family member 22 [Source:HGNC       |                       |             |      |      |                |
| Symbol;Acc:HGNC:6391]                                                | -                                           | 1201                  | 1539        | 1891 | 717  | 728            |
| 869                                                                  | 15.23207144                                 | 15.73598111           | 20.31492543 |      |      |                |
| 8.039732888                                                          | 7.357177345                                 | 9.407777989           |             |      |      |                |
| ENSG00000082497                                                      | 566.9112211                                 | 364.2917984           | 697.1702707 |      |      |                |
| 154.7050462                                                          | 203.7907527                                 | 174.6563625           | 542.7910967 |      |      |                |
| 177.7173871                                                          | 1.609723335                                 | 2.01E-09              | 1.21E-07    |      |      |                |
| SERTAD4                                                              | 1                                           | 210232799             | 210246631   | +    | 5467 |                |
| protein_coding                                                       | SERTA domain containing 4 [Source:HGNC      |                       |             |      |      |                |
| Symbol;Acc:HGNC:25236]                                               | -                                           | 490                   | 393         | 713  | 154  | 223            |
| 178                                                                  | 4.90164347                                  | 3.169402779           | 6.041474013 |      |      |                |
| 1.36198669                                                           | 1.777519554                                 | 1.519906822           |             |      |      |                |
| ENSG00000130706                                                      | 3610.87739                                  | 4318.665365           | 3936.616423 |      |      |                |
| 7850.778805                                                          | 6461.903193                                 | 6518.214696           | 3955.386393 |      |      |                |
| 6943.632231                                                          | -0.811646579                                | 2.18E-09              | 1.31E-07    |      |      | ADRM1          |
| 20                                                                   | 62302093                                    | 62308862              | +           | 2142 |      |                |
| protein_coding                                                       | adhesion regulating molecule 1 [Source:HGNC |                       |             |      |      |                |
| Symbol;Acc:HGNC:15759]                                               | -                                           | 3121                  | 4659        | 4026 | 7815 | 7071           |
| 6643                                                                 | 79.68361251                                 | 95.89748155           | 87.06763738 |      |      |                |

|                                                                 |                                                        |             |             |             |                |             |
|-----------------------------------------------------------------|--------------------------------------------------------|-------------|-------------|-------------|----------------|-------------|
| 176.4049357                                                     | 143.8533462                                            | 144.7740827 |             |             |                |             |
| ENSG00000185567                                                 | 1067.875627                                            | 1636.068764 | 798.861306  |             |                |             |
| 2717.384091                                                     | 2499.406765                                            | 3499.014542 | 1167.601899 |             |                |             |
| 2905.268466                                                     | -1.314666982                                           | 2.30E-09    | 1.38E-07    | AHNAK2      |                |             |
| 14                                                              | 104937244                                              | 104978357   | -           | 18771       |                |             |
| protein_coding                                                  | AHNAK nucleoprotein 2 [Source:HGNC                     |             |             |             |                |             |
| Symbol;Acc:HGNC:20125]                                          | -                                                      | 923         | 1765        | 817         | 2705           | 2735        |
| 3566                                                            | 2.689112702                                            | 4.145636869 | 2.016216213 |             |                |             |
| 6.967565759                                                     | 6.34933905                                             | 8.868291604 |             |             |                |             |
| ENSG00000000971                                                 | 584.2656462                                            | 374.4882609 | 689.3478834 |             |                |             |
| 185.8469711                                                     | 184.5996952                                            | 195.2618884 | 549.3672635 |             |                |             |
| 188.5695182                                                     | 1.54220899                                             | 2.34E-09    | 1.40E-07    | CFH         |                |             |
| 1                                                               | 196651878                                              | 196747504   | +           | 8145        |                |             |
| protein_coding                                                  | complement factor H [Source:HGNC Symbol;Acc:HGNC:4883] |             |             |             |                |             |
| -                                                               | 505                                                    | 404         | 705         | 185         | 202            | 199         |
| 3.390744002                                                     | 2.186876383                                            | 4.009594782 | 1.098201054 |             |                |             |
| 1.080734159                                                     | 1.140533441                                            |             |             |             |                |             |
| ENSG00000069020                                                 | 539.1441409                                            | 522.8004434 | 464.4542477 |             |                |             |
| 1216.544227                                                     | 923.9123361                                            | 1054.806683 | 508.7996107 |             |                |             |
| 1065.087749                                                     | -1.065925215                                           | 2.43E-09    | 1.44E-07    | MAST4       |                |             |
| 5                                                               | 66596361                                               | 67169595    | +           | 14675       |                |             |
| protein_coding                                                  | microtubule associated serine/threonine kinase family  |             |             |             |                |             |
| member 4 [Source:HGNC Symbol;Acc:HGNC:19037]                    | -                                                      |             |             | 466         | 564            |             |
| 475                                                             | 1211                                                   | 1011        | 1075        | 1.736610888 | 1.694474166    |             |
| 1.49940155                                                      | 3.989948129                                            | 3.002144856 | 3.419608518 |             |                |             |
| ENSG00000182551                                                 | 1596.607112                                            | 1624.94535  | 1801.104683 |             |                |             |
| 843.8457065                                                     | 866.3391638                                            | 988.0840281 | 1674.219048 |             |                |             |
| 899.4229661                                                     | 0.896570824                                            | 2.67E-09    | 1.58E-07    | ADI1        |                |             |
| 2                                                               | 3497361                                                | 3519736     | -           | 5560        | protein_coding |             |
| acireductone dioxxygenase 1 [Source:HGNC Symbol;Acc:HGNC:30576] | -                                                      |             |             |             |                |             |
| 1380                                                            | 1753                                                   | 1842        | 840         | 948         | 1007           | 13.57372379 |
| 13.90084121                                                     | 15.3467808                                             | 7.304755952 | 7.430056966 |             |                |             |
| 8.454748918                                                     |                                                        |             |             |             |                |             |
| ENSG00000085117                                                 | 1797.918444                                            | 2004.995318 | 2765.213921 |             |                |             |
| 651.9712661                                                     | 1172.482223                                            | 881.1315365 | 2189.375894 |             |                |             |
| 901.8616751                                                     | 1.279302839                                            | 2.80E-09    | 1.65E-07    | CD82        |                |             |
| 11                                                              | 44564427                                               | 44620363    | +           | 4054        |                |             |
| protein_coding                                                  | CD82 molecule [Source:HGNC Symbol;Acc:HGNC:6210]       |             |             |             |                |             |
| -                                                               | 1554                                                   | 2163        | 2828        | 649         | 1283           | 898         |
| 20.96341263                                                     | 23.52375963                                            | 32.3145503  | 7.740377983 |             |                |             |
| 13.79118263                                                     | 10.34043069                                            |             |             |             |                |             |
| ENSG00000118515                                                 | 666.4099252                                            | 659.9892123 | 350.051833  |             |                |             |
| 1251.704465                                                     | 1559.044951                                            | 1413.931564 | 558.8169902 |             |                |             |
| 1408.226993                                                     | -1.334108432                                           | 3.02E-09    | 1.78E-07    | SGK1        |                |             |
| 6                                                               | 134169246                                              | 134318112   | -           | 9992        |                |             |
| protein_coding                                                  | serum/glucocorticoid regulated kinase 1 [Source:HGNC   |             |             |             |                |             |
| Symbol;Acc:HGNC:10810]                                          | -                                                      | 576         | 712         | 358         | 1246           | 1706        |
| 1441                                                            | 3.152570235                                            | 3.141676954 | 1.659713235 |             |                |             |
| 6.029299165                                                     | 7.440210095                                            | 6.732209018 |             |             |                |             |
| ENSG00000148841                                                 | 2072.118361                                            | 2768.803058 | 2209.824421 |             |                |             |

|                 |                                                                                                 |             |             |                |
|-----------------|-------------------------------------------------------------------------------------------------|-------------|-------------|----------------|
| 4454.299836     | 5096.596536                                                                                     | 3869.914009 | 2350.248613 |                |
| 4473.603461     | -0.928335803                                                                                    | 3.36E-09    | 1.97E-07    | ITPRIP         |
| 10              | 104309698                                                                                       | 104338448   | -           | 7279           |
| protein_coding  | "inositol 1,4,5-trisphosphate receptor interacting protein [Source:HGNC Symbol;Acc:HGNC:29370]" |             |             |                |
| 2260            | 4434                                                                                            | 5577        | 3944        | 13.45608058    |
|                 | 14.38265873                                                                                     | 29.45270489 | 33.38777844 | 18.09245334    |
|                 |                                                                                                 |             |             | 25.29363358    |
| ENSG00000141753 | 2102.199365                                                                                     | 2584.339781 | 4878.236298 |                |
| 612.7927154     | 541.9189073                                                                                     | 697.6442343 | 3188.258481 |                |
| 617.4519524     | 2.368489883                                                                                     | 3.39E-09    | 1.98E-07    | IGFBP4         |
| 17              | 40443461                                                                                        | 40457731    | +           | 2200           |
| protein_coding  | insulin like growth factor binding protein 4 [Source:HGNC Symbol;Acc:HGNC:5473]                 |             |             |                |
| 610             | 593                                                                                             | 711         | 45.16759423 | 55.8732645     |
| 105.0493281     | 13.40628262                                                                                     | 11.7460166  | 15.08665488 |                |
| ENSG00000152952 | 8029.314029                                                                                     | 4962.896408 | 6472.047717 |                |
| 3051.908639     | 3177.490794                                                                                     | 3578.493    | 6488.086051 |                |
| 3269.297477     | 0.988613844                                                                                     | 3.52E-09    | 2.04E-07    | PL0D2          |
| 3               | 146069440                                                                                       | 146163653   | -           | 7646           |
| protein_coding  | "procollagen-lysine,2-oxoglutarate 5-dioxygenase 2 [Source:HGNC Symbol;Acc:HGNC:9082]"          |             |             |                |
| 3038            | 3477                                                                                            | 3647        | 49.63864175 | 30.872943      |
| 40.10149312     | 19.2112088                                                                                      | 19.81659323 | 22.26627177 |                |
| ENSG00000119865 | 922.0984555                                                                                     | 940.855408  | 1057.977886 |                |
| 391.7855066     | 492.5704739                                                                                     | 506.307208  | 973.6439166 |                |
| 463.5543962     | 1.070484533                                                                                     | 3.53E-09    | 2.05E-07    | CNRIP1         |
| 2               | 68284171                                                                                        | 68320051    | -           | 3548           |
| protein_coding  | cannabinoid receptor interacting protein 1 [Source:HGNC Symbol;Acc:HGNC:24546]                  |             |             |                |
| 390             | 539                                                                                             | 516         | 12.28483769 | 12.61294172    |
| 14.1268751      | 5.314742312                                                                                     | 6.620087836 | 6.789098759 |                |
| ENSG00000132510 | 470.883402                                                                                      | 538.5586128 | 554.411702  |                |
| 1226.590009     | 950.4142725                                                                                     | 1053.825468 | 521.2845723 |                |
| 1076.94325      | -1.045821131                                                                                    | 3.56E-09    | 2.05E-07    | KDM6B          |
| 17              | 7839904                                                                                         | 7854796     | +           | 7258           |
| demethylase 6B  | [Source:HGNC Symbol;Acc:HGNC:29012]                                                             |             |             | protein_coding |
| 581             | 567                                                                                             | 1221        | 1040        | 1074           |
| 3.529336979     | 3.618833074                                                                                     | 8.133920373 | 6.244173663 | lysine         |
| 6.907698176     |                                                                                                 |             |             | 407            |
| ENSG00000122952 | 1476.283098                                                                                     | 1561.912672 | 2123.77816  |                |
| 821.7449856     | 738.398781                                                                                      | 915.4740797 | 1720.657977 |                |
| 825.2059487     | 1.060558716                                                                                     | 3.58E-09    | 2.06E-07    | ZWINT          |
| 10              | 56357228                                                                                        | 56361275    | -           | 2378           |
| protein_coding  | ZW10 interacting kinetochore protein [Source:HGNC Symbol;Acc:HGNC:13195]                        |             |             |                |
| 933             | 29.34496101                                                                                     | 31.24079038 | 42.31072104 |                |
| 16.63193082     | 14.80669424                                                                                     | 18.3153756  |             |                |
| ENSG00000100526 | 443.1163218                                                                                     | 495.9188604 | 583.7456544 |                |
| 122.5585431     | 233.9481286                                                                                     | 132.4640951 | 507.5936122 |                |
| 162.9902556     | 1.637467853                                                                                     | 3.83E-09    | 2.19E-07    | CDKN3          |

|                                     |                                                       |             |             |             |           |
|-------------------------------------|-------------------------------------------------------|-------------|-------------|-------------|-----------|
| 14                                  | 54396849                                              | 54420218    | +           | 1836        |           |
| protein_coding                      | cyclin dependent kinase inhibitor 3 [Source:HGNC      |             |             |             |           |
| Symbol;Acc:HGNC:1791]               | -                                                     | 383         | 535         | 597         | 122 256   |
| 135                                 | 11.40829676                                           | 12.84739459 |             | 15.06274452 |           |
| 3.212834616                         | 6.076113618                                           | 3.432472982 |             |             |           |
| ENSG00000118523                     | 974.161731                                            | 1308.855011 |             | 1476.475608 |           |
| 543.4768181                         | 424.944843                                            | 641.7149497 |             | 1253.164117 |           |
| 536.7122036                         | 1.224286358                                           | 3.96E-09    |             | 2.25E-07    | CTGF      |
| 6                                   | 131948176                                             | 131951373   | -           | 2339        |           |
| protein_coding                      | connective tissue growth factor [Source:HGNC          |             |             |             |           |
| Symbol;Acc:HGNC:2500]               | -                                                     | 842         | 1412        | 1510        | 541 465   |
| 654                                 | 19.68686587                                           | 26.6157331  |             | 29.90537009 |           |
| 11.18325582                         | 8.663259606                                           | 13.05249581 |             |             |           |
| ENSG00000166598                     | 11162.36625                                           | 8740.222307 |             | 12946.05103 |           |
| 5045.996409                         | 5125.840052                                           | 6662.453377 |             | 10949.54653 |           |
| 5611.429946                         | 0.964414658                                           | 3.96E-09    |             | 2.25E-07    |           |
| HSP90B1 12                          | 103930107                                             | 103953645   | +           | 4695        |           |
| protein_coding                      | heat shock protein 90 beta family member 1            |             |             |             |           |
| [Source:HGNC Symbol;Acc:HGNC:12028] | -                                                     |             | 9648        | 9429        | 13240     |
| 5023                                | 5609                                                  | 6790        | 112.3819105 | 88.54499079 |           |
| 130.6335847                         | 51.72837052                                           | 52.06051274 | 67.5118818  |             |           |
| ENSG00000004700                     | 1698.41974                                            | 1429.358659 | 1461.808632 |             |           |
| 824.7587203                         | 730.1740421                                           | 860.5260106 | 1529.862344 |             |           |
| 805.1529243                         | 0.925881565                                           | 4.17E-09    | 2.36E-07    |             | RECQL     |
| 12                                  | 21468911                                              | 21501669    | -           | 3778        |           |
| protein_coding                      | RecQ like helicase [Source:HGNC Symbol;Acc:HGNC:9948] |             |             |             |           |
| -                                   | 1468                                                  | 1542        | 1495        | 821         | 799 877   |
| 21.24999415                         | 17.99518758                                           | 18.33081164 | 10.50708922 |             |           |
| 9.216020316                         | 10.83636627                                           |             |             |             |           |
| ENSG00000105373                     | 4192.829113                                           | 5867.600722 | 4755.033698 |             |           |
| 8504.759228                         | 8526.312656                                           | 10614.78949 | 4938.487844 |             |           |
| 9215.287125                         | -0.899740449                                          | 4.50E-09    | 2.54E-07    |             | NOP53     |
| 19                                  | 47745522                                              | 47757058    | +           | 5341        |           |
| protein_coding                      | NOP53 ribosome biogenesis factor [Source:HGNC         |             |             |             |           |
| Symbol;Acc:HGNC:4333]               | -                                                     | 3624        | 6330        | 4863        | 8466 9330 |
| 10818                               | 37.10738274                                           | 52.25346447 | 42.17782178 |             |           |
| 76.64024822                         | 76.12330991                                           | 94.55193802 |             |             |           |
| ENSG00000215030                     | 3118.011716                                           | 2812.369761 | 2712.412806 |             |           |
| 4576.85838                          | 5142.28953                                            | 4771.651071 | 2880.931428 |             |           |
| 4830.266327                         | -0.745841556                                          | 4.62E-09    | 2.60E-07    |             |           |
| RPL13P12                            | 17                                                    | 17383377    | 17384012    | -           | 636       |
| processed_pseudogene                | ribosomal protein L13 pseudogene 12                   |             |             |             |           |
| [Source:HGNC Symbol;Acc:HGNC:35701] | -                                                     |             | 2695        | 3034        | 2774      |
| 4556                                | 5627                                                  | 4863        | 231.7375262 | 210.3257367 |           |
| 202.0467164                         | 346.360068                                            | 385.5479491 | 356.9383319 |             |           |
| ENSG00000185480                     | 592.364378                                            | 498.6997138 | 503.5661843 |             |           |
| 248.1308208                         | 212.9293514                                           | 204.092828  | 531.5434254 |             |           |
| 221.7176668                         | 1.261142525                                           | 4.74E-09    | 2.65E-07    |             | PARPBP    |
| 12                                  | 102120185                                             | 102197520   | +           | 4745        |           |
| protein_coding                      | PARP1 binding protein [Source:HGNC                    |             |             |             |           |

|                                     |                                                   |                                    |      |                |       |             |
|-------------------------------------|---------------------------------------------------|------------------------------------|------|----------------|-------|-------------|
| Symbol;Acc:HGNC:26074]              | -                                                 | 512                                | 538  | 515            | 247   | 233         |
| 208                                 | 5.90103862                                        | 4.998964088                        |      | 5.027747608    |       |             |
| 2.516876774                         | 2.139825221                                       | 2.046318139                        |      |                |       |             |
| ENSG00000168036                     | 12982.26696                                       | 12171.79543                        |      | 13389.97151    |       |             |
| 7395.704871                         | 8406.597012                                       | 8142.126381                        |      | 12848.0113     |       |             |
| 7981.476088                         | 0.686768347                                       | 5.19E-09                           |      | 2.90E-07       |       | CTNNB1      |
| 3                                   | 41194741                                          | 41260096                           |      | +              | 11927 |             |
| protein_coding                      | catenin beta 1                                    | [Source:HGNC Symbol;Acc:HGNC:2514] |      |                |       |             |
| -                                   | 11221 13131                                       | 13694 7362                         |      | 9199 8298      |       |             |
| 51.4511464                          | 48.54008584                                       | 53.18651813                        |      | 29.84460329    |       |             |
| 33.60996013                         | 32.47792294                                       |                                    |      |                |       |             |
| ENSG00000069275                     | 16178.95207                                       | 13531.63275                        |      | 18993.73423    |       |             |
| 9338.559152                         | 9635.738547                                       | 8504.194907                        |      | 16234.77302    |       |             |
| 9159.497536                         | 0.825719606                                       | 5.82E-09                           |      | 3.24E-07       |       | NUCKS1      |
| 1                                   | 205712819                                         | 205750276                          |      | -              | 6546  |             |
| protein_coding                      | nuclear casein kinase and cyclin dependent kinase |                                    |      |                |       |             |
| substrate 1                         | [Source:HGNC Symbol;Acc:HGNC:29923]               |                                    |      |                |       | -           |
| 19425                               | 9296 10544                                        | 8667 116.8288568                   |      | 98.3221386     |       | 14598       |
|                                     | 137.4635269                                       | 68.6627717                         |      | 70.19206093    |       | 61.80716611 |
| ENSG00000104142                     | 1045.893355                                       | 940.855408                         |      | 1099.04542     |       |             |
| 1711.80129                          | 2143.915272                                       | 1880.990151                        |      | 1028.598061    |       |             |
| 1912.235571                         | -0.894938968                                      | 5.96E-09                           |      | 3.30E-07       |       | VPS18       |
| 15                                  | 40894430                                          | 40903975                           |      | +              | 4049  |             |
| protein_coding                      | "VPS18, CORVET/HOPS core subunit                  | [Source:HGNC                       |      |                |       |             |
| Symbol;Acc:HGNC:15972]"             | -                                                 | 904 1015                           |      | 1124 1704      |       | 2346        |
| 1917                                | 12.20999164                                       | 11.05228877                        |      | 12.85940843    |       |             |
| 20.34806096                         | 25.24868876                                       | 22.10142989                        |      |                |       |             |
| ENSG00000196950                     | 1000.771849                                       | 605.299095                         |      | 739.2156026    |       |             |
| 323.4741875                         | 333.5588553                                       | 313.0077507                        |      | 781.7621824    |       |             |
| 323.3469312                         | 1.272430665                                       | 6.02E-09                           |      | 3.32E-07       |       |             |
| SLC39A10                            | 2 195575977                                       | 195737702                          |      | +              |       | 6917        |
| protein_coding                      | solute carrier family 39 member 10                |                                    |      |                |       |             |
| [Source:HGNC Symbol;Acc:HGNC:20861] | -                                                 | 865                                |      | 653            |       | 756         |
| 322                                 | 365 319                                           | 6.839006941                        |      | 4.162261516    |       |             |
| 5.062983075                         | 2.25081247                                        | 2.299501443                        |      | 2.152875638    |       |             |
| ENSG00000176890                     | 1251.832533                                       | 1376.522444                        |      | 1477.453407    |       |             |
| 618.8201848                         | 799.6273927                                       | 673.1138464                        |      | 1368.602795    |       |             |
| 697.1871413                         | 0.972938776                                       | 6.13E-09                           |      | 3.37E-07       |       | TYMS        |
| 18                                  | 657604 673578                                     | +                                  | 2470 | protein_coding |       |             |
| thymidylate synthetase              | [Source:HGNC Symbol;Acc:HGNC:12441]               |                                    |      |                |       | -           |
| 1082                                | 1485 1511                                         | 616 875                            |      | 686 23.9565911 |       |             |
|                                     | 26.5071758                                        | 28.3380503                         |      | 12.0582692     |       | 15.43724147 |
|                                     | 12.96502022                                       |                                    |      |                |       |             |
| ENSG00000106049                     | 969.5338842                                       | 1161.469779                        |      | 1153.802131    |       |             |
| 510.3257368                         | 554.7129456                                       | 593.6353893                        |      | 1094.935265    |       |             |
| 552.8913572                         | 0.986202337                                       | 6.27E-09                           |      | 3.44E-07       |       | HIBADH      |
| 7                                   | 27525442                                          | 27662995                           |      | -              | 2323  |             |
| protein_coding                      | 3-hydroxyisobutyrate dehydrogenase                | [Source:HGNC                       |      |                |       |             |
| Symbol;Acc:HGNC:4907]               | -                                                 | 838 1253                           |      | 1180 508       |       | 607         |
| 605                                 | 19.72829356                                       | 23.78131246                        |      | 23.53072202    |       |             |

|                        |                                               |              |             |       |        |
|------------------------|-----------------------------------------------|--------------|-------------|-------|--------|
| 10.57342573            | 11.38670525                                   | 12.15772178  |             |       |        |
| ENSG00000142173        | 42749.73392                                   | 28062.51884  | 46788.63201 |       |        |
| 15571.96702            | 18141.94629                                   | 22730.83872  | 39200.29492 |       |        |
| 18814.91734            | 1.058969884                                   | 6.67E-09     | 3.64E-07    |       | COL6A2 |
| 21                     | 46098097                                      | 46132849     | +           | 5386  |        |
| protein_coding         | collagen type VI alpha 2 chain                | [Source:HGNC |             |       |        |
| Symbol;Acc:HGNC:2212]  | -                                             | 36950 30274  | 47851 15501 |       | 19852  |
| 23166                  | 375.1827017                                   | 247.8206065  | 411.5542822 |       |        |
| 139.153644             | 160.6188511                                   | 200.7847567  |             |       |        |
| ENSG00000166963        | 930.1971873                                   | 890.8000464  | 794.9501123 |       |        |
| 2173.907272            | 1450.295625                                   | 1708.296219  | 871.9824487 |       |        |
| 1777.499706            | -1.027524529                                  | 6.74E-09     | 3.66E-07    |       | MAP1A  |
| 15                     | 43510958                                      | 43531620     | +           | 10629 |        |
| protein_coding         | microtubule associated protein 1A             | [Source:HGNC |             |       |        |
| Symbol;Acc:HGNC:6835]  | -                                             | 804 961      | 813 2164    |       | 1587   |
| 1741                   | 4.136741226                                   | 3.98625373   | 3.543240198 |       |        |
| 9.843874447            | 6.506435329                                   | 7.646318777  |             |       |        |
| ENSG00000143870        | 3307.753431                                   | 3497.386654  | 4241.689529 |       |        |
| 1827.327786            | 1776.543602                                   | 2299.969178  | 3682.276538 |       |        |
| 1967.946855            | 0.904091468                                   | 6.79E-09     | 3.68E-07    |       | PDIA6  |
| 2                      | 10783391                                      | 10837977     | -           | 4101  |        |
| protein_coding         | protein disulfide isomerase family A member 6 | [Source:HGNC |             |       |        |
| Symbol;Acc:HGNC:30168] | -                                             |              | 2859 3773   |       | 4338   |
| 1819                   | 1944 2344                                     | 38.12581172  | 40.56308652 |       |        |
| 49.00069436            | 21.44589356                                   | 20.65689724  | 26.68172317 |       |        |
| ENSG00000163041        | 4226.381001                                   | 4003.501977  | 4171.288043 |       |        |
| 2327.60774             | 2608.15609                                    | 2587.465325  | 4133.723674 |       |        |
| 2507.743052            | 0.720918873                                   | 7.06E-09     | 3.81E-07    |       | H3F3A  |
| 1                      | 226061851                                     | 226072001    | +           | 3146  |        |
| protein_coding         | H3 histone family member 3A                   | [Source:HGNC |             |       |        |
| Symbol;Acc:HGNC:4764]  | -                                             | 3653 4319    | 4266 2317   |       | 2854   |
| 2637                   | 63.50174602                                   | 60.52829544  | 62.81517711 |       |        |
| 35.6097178             | 39.53246073                                   | 39.12888272  |             |       |        |
| ENSG00000203760        | 355.1872344                                   | 409.7124043  | 505.5217812 |       |        |
| 53.24264577            | 147.1314403                                   | 132.4640951  | 423.4738066 |       |        |
| 110.9460604            | 1.931042558                                   | 7.21E-09     | 3.88E-07    |       | CENPW  |
| 6                      | 126340174                                     | 126348875    | +           | 795   |        |
| protein_coding         | centromere protein W                          | [Source:HGNC |             |       |        |
| Symbol;Acc:HGNC:21488] | -                                             | 307 442      | 517 53      |       | 161    |
| 135                    | 21.11864061                                   | 24.51258421  | 30.12491778 |       |        |
| 3.223368499            | 8.825053464                                   | 7.927069679  |             |       |        |
| ENSG00000142230        | 4639.41632                                    | 4984.216284  | 5872.657287 |       |        |
| 3092.091767            | 2879.572474                                   | 3069.242145  | 5165.429964 |       |        |
| 3013.635462            | 0.777545344                                   | 7.33E-09     | 3.92E-07    |       | SAE1   |
| 19                     | 47113274                                      | 47210636     | +           | 3396  |        |
| protein_coding         | SUM01 activating enzyme subunit 1             | [Source:HGNC |             |       |        |
| Symbol;Acc:HGNC:30660] | -                                             | 4010 5377    | 6006 3078   |       | 3151   |
| 3128                   | 64.57603919                                   | 69.80817958  | 81.92568892 |       |        |
| 43.8230046             | 40.43331222                                   | 42.99768747  |             |       |        |
| ENSG00000122545        | 8390.286072                                   | 6969.745628  | 7873.232847 |       |        |

|                                     |                                                        |             |             |             |      |
|-------------------------------------|--------------------------------------------------------|-------------|-------------|-------------|------|
| 4025.344936                         | 5074.663899                                            | 4292.817898 | 7744.421516 |             |      |
| 4464.275578                         | 0.794548722                                            | 7.33E-09    | 3.92E-07    | 7-Sep       |      |
| 7                                   | 35800932                                               | 35907105    | +           | 10906       |      |
| protein_coding                      | septin 7 [Source:HGNC Symbol;Acc:HGNC:1717]            |             |             |             | -    |
| 7252                                | 7519                                                   | 8052        | 4007        | 5553        | 4375 |
| 30.39684784                         | 34.20115153                                            | 17.76458497 | 22.18813389 |             |      |
| 18.72658559                         |                                                        |             |             |             |      |
| ENSG00000137573                     | 319.3214225                                            | 178.9015702 | 356.8964219 |             |      |
| 85.38914887                         | 46.60685375                                            | 73.59116396 | 285.0398049 |             |      |
| 68.52905553                         | 2.057573461                                            | 7.40E-09    | 3.94E-07    | SULF1       |      |
| 8                                   | 69466624                                               | 69660915    | +           | 9404        |      |
| protein_coding                      | sulfatase 1 [Source:HGNC Symbol;Acc:HGNC:20391]        |             |             |             | -    |
| 276                                 | 193                                                    | 365         | 85          | 51          | 75   |
| 0.904854283                         | 1.797971071                                            | 0.437026248 | 0.23632853  |             |      |
| 0.372301408                         |                                                        |             |             |             |      |
| ENSG00000091136                     | 4167.375956                                            | 2717.820745 | 5668.297418 |             |      |
| 1889.611636                         | 1269.35137                                             | 1956.543746 | 4184.49804  |             |      |
| 1705.168917                         | 1.295238156                                            | 7.57E-09    | 4.02E-07    | LAMB1       |      |
| 7                                   | 107923799                                              | 108003255   | -           | 8140        |      |
| protein_coding                      | laminin subunit beta 1 [Source:HGNC                    |             |             |             |      |
| Symbol;Acc:HGNC:6486]               | -                                                      | 3602        | 2932        | 5797        | 1881 |
| 1994                                | 24.19992479                                            | 15.88084178 | 32.98992675 | 1389        |      |
| 11.17289216                         | 7.435949618                                            | 11.43527952 |             |             |      |
| ENSG00000137135                     | 264.9442237                                            | 246.5690035 | 356.8964219 |             |      |
| 75.34336665                         | 99.61072664                                            | 90.27182779 | 289.469883  |             |      |
| 88.40864036                         | 1.710387871                                            | 7.77E-09    | 4.11E-07    |             |      |
| ARHGEF39                            | 9                                                      | 35658875    | 35675866    | -           | 6496 |
| protein_coding                      | Rho guanine nucleotide exchange factor 39              |             |             |             |      |
| [Source:HGNC Symbol;Acc:HGNC:25909] | -                                                      |             | 229         | 266         | 365  |
| 75                                  | 109                                                    | 92          | 1.92789856  | 1.805383955 |      |
| 2.602850978                         | 0.558234231                                            | 0.731204877 | 0.661131496 |             |      |
| ENSG00000087303                     | 263.7872621                                            | 210.417909  | 363.7410108 |             |      |
| 91.4166182                          | 26.50193645                                            | 47.09834493 | 279.3153939 |             |      |
| 55.00563319                         | 2.347698859                                            | 8.25E-09    | 4.35E-07    | NID2        |      |
| 14                                  | 52004803                                               | 52069228    | -           | 6392        |      |
| protein_coding                      | nidogen 2 [Source:HGNC Symbol;Acc:HGNC:13389]          |             |             |             | -    |
| 228                                 | 227                                                    | 372         | 91          | 29          | 48   |
| 1.565752266                         | 2.695930111                                            | 0.688344493 | 0.197705991 |             |      |
| 0.350550432                         |                                                        |             |             |             |      |
| ENSG00000153904                     | 1033.166776                                            | 823.1326131 | 1087.311839 |             |      |
| 471.1471861                         | 437.7388813                                            | 508.2696391 | 981.2037428 |             |      |
| 472.3852355                         | 1.054424323                                            | 8.60E-09    | 4.52E-07    | DDAH1       |      |
| 1                                   | 85318481                                               | 85578363    | -           | 4568        |      |
| protein_coding                      | dimethylarginine dimethylaminohydrolase 1 [Source:HGNC |             |             |             |      |
| Symbol;Acc:HGNC:2715]               | -                                                      | 893         | 888         | 1112        | 469  |
| 518                                 | 10.691043                                              | 8.570789493 | 11.27667718 | 479         |      |
| 4.964185069                         | 4.569492995                                            | 5.293582676 |             |             |      |
| ENSG00000077097                     | 5968.765285                                            | 4990.704942 | 5821.81177  |             |      |
| 3636.573164                         | 3077.880067                                            | 2867.111748 | 5593.760666 |             |      |
| 3193.854993                         | 0.808473514                                            | 9.31E-09    | 4.87E-07    | TOP2B       |      |

|                         |                                                       |             |             |       |           |
|-------------------------|-------------------------------------------------------|-------------|-------------|-------|-----------|
| 3                       | 25597905                                              | 25664907    | -           | 6044  |           |
| protein_coding          | DNA topoisomerase II beta [Source:HGNC                |             |             |       |           |
| Symbol;Acc:HGNC:11990]  | -                                                     | 5159        | 5384        | 5954  | 3620 3368 |
| 2922                    | 46.68053072                                           | 39.27485167 | 45.63382057 |       |           |
| 28.95911805             | 24.28321723                                           | 22.56845307 |             |       |           |
| ENSG0000019549          | 1430.004631                                           | 1011.303695 | 1180.202688 |       |           |
| 579.6416341             | 559.282245                                            | 632.8840101 | 1207.170338 |       |           |
| 590.6026297             | 1.030759482                                           | 9.84E-09    | 5.13E-07    |       | SNAI2     |
| 8                       | 48917604                                              | 48921740    | -           | 3392  |           |
| protein_coding          | snail family transcriptional repressor 2 [Source:HGNC |             |             |       |           |
| Symbol;Acc:HGNC:11094]  | zf-C2H2                                               | 1236        | 1091        | 1207  | 577 612   |
| 645                     | 19.9277075                                            | 14.18086965 | 16.48366889 |       |           |
| 8.224721216             | 7.862382648                                           | 8.876666568 |             |       |           |
| ENSG0000064393          | 2080.217093                                           | 2022.607389 | 1955.596832 |       |           |
| 3494.927634             | 3137.280959                                           | 3381.26868  | 2019.473772 |       |           |
| 3337.825758             | -0.724972292                                          | 1.12E-08    | 5.82E-07    |       | HIPK2     |
| 7                       | 139561570                                             | 139777778   | -           | 15402 |           |
| protein_coding          | homeodomain interacting protein kinase 2 [Source:HGNC |             |             |       |           |
| Symbol;Acc:HGNC:14402]  | -                                                     | 1798        | 2182        | 2000  | 3479 3433 |
| 3446                    | 6.38421172                                            | 6.246138144 | 6.015272862 |       |           |
| 10.92140535             | 9.713042346                                           | 10.44441669 |             |       |           |
| ENSG00000184226         | 520.6327541                                           | 542.2664174 | 350.051833  |       |           |
| 1239.649526             | 1118.56449                                            | 890.9436917 | 470.9836682 |       |           |
| 1083.052569             | -1.201682119                                          | 1.20E-08    | 6.24E-07    |       | PCDH9     |
| 13                      | 66302834                                              | 67230445    | -           | 30944 |           |
| protein_coding          | protocadherin 9 [Source:HGNC Symbol;Acc:HGNC:8661]    |             |             |       |           |
| -                       | 450                                                   | 585         | 358         | 1234  | 1224 908  |
| 0.795299618             | 0.833514908                                           | 0.535931187 | 1.928146036 |       |           |
| 1.723707468             | 1.369794544                                           |             |             |       |           |
| ENSG00000123473         | 1509.834987                                           | 1339.444399 | 1675.946485 |       |           |
| 572.6095866             | 824.3016094                                           | 802.6342949 | 1508.408624 |       |           |
| 733.1818303             | 1.040342138                                           | 1.23E-08    | 6.38E-07    |       | STIL      |
| 1                       | 47250139                                              | 47314147    | -           | 7291  |           |
| protein_coding          | "STIL, centriolar assembly protein [Source:HGNC       |             |             |       |           |
| Symbol;Acc:HGNC:10879]" | -                                                     | 1305        | 1445        | 1714  | 570 902   |
| 818                     | 9.78854465                                            | 8.738053649 | 10.88995726 |       |           |
| 3.779975404             | 5.391108061                                           | 5.23735776  |             |       |           |
| ENSG00000213949         | 497.4935206                                           | 232.6647364 | 489.8770065 |       |           |
| 114.5219173             | 132.5096822                                           | 110.8773537 | 406.6784211 |       |           |
| 119.3029844             | 1.767696377                                           | 1.30E-08    | 6.69E-07    |       | ITGA1     |
| 5                       | 52787896                                              | 52959210    | +           | 18566 |           |
| protein_coding          | integrin subunit alpha 1 [Source:HGNC                 |             |             |       |           |
| Symbol;Acc:HGNC:6134]   | -                                                     | 430         | 251         | 501   | 114 145   |
| 113                     | 1.26661557                                            | 0.596059115 | 1.250034028 |       |           |
| 0.296884635             | 0.340336285                                           | 0.284122831 |             |       |           |
| ENSG00000166801         | 1899.731072                                           | 1631.434008 | 1759.059351 |       |           |
| 1034.715569             | 988.7963874                                           | 800.6718639 | 1763.408143 |       |           |
| 941.3946066             | 0.90519849                                            | 1.33E-08    | 6.81E-07    |       |           |
| FAM111A                 | 11                                                    | 59142748    | 59155039    | +     | 7221      |
| protein_coding          | family with sequence similarity 111 member A          |             |             |       |           |



|                                     |                                                 |             |             |             |
|-------------------------------------|-------------------------------------------------|-------------|-------------|-------------|
| [Source:HGNC Symbol;Acc:HGNC:24725] | -                                               | 1642        | 1760        | 1799        |
| 1030                                | 1082                                            | 816         | 12.43570813 | 10.74606049 |
| 11.54080955                         | 6.896696208                                     | 6.529629109 | 5.275199026 |             |
| ENSG00000268858                     | 363.2859662                                     | 389.3194792 | 303.117509  |             |
| 956.3584674                         | 630.5633154                                     | 860.5260106 | 351.9076514 |             |
| 815.8159311                         | -1.212701688                                    | 1.33E-08    | 6.81E-07    |             |
| AL118506.1                          | 20                                              | 63861212    | 63864293    | -           |
| antisense                           | "novel transcript, antisense to ABHD16B"        |             |             |             |
| -                                   | 314                                             | 420         | 310         | 952         |
| 5.571751343                         | 6.008286231                                     | 4.659416307 | 690         | 877         |
| 9.756073288                         | 13.28351452                                     |             | 14.93501044 |             |
| ENSG00000116584                     | 3652.52801                                      | 5574.684161 | 3886.748704 |             |
| 8636.358975                         | 8567.436351                                     | 7632.875526 | 4371.320292 |             |
| 8278.890284                         | -0.92112111                                     | 1.34E-08    | 6.82E-07    |             |
| ARHGEF2 1                           | 155946851                                       | 156007070   | -           | 9135        |
| protein_coding                      | Rho/Rac guanine nucleotide exchange factor 2    |             |             |             |
| [Source:HGNC Symbol;Acc:HGNC:682]   | -                                               | 3157        | 6014        | 3975        |
| 8597                                | 9375                                            | 7779        | 18.89995382 | 29.02610955 |
| 20.15723863                         | 45.50295401                                     | 44.72201083 | 39.75220795 |             |
| ENSG00000093009                     | 1096.799669                                     | 1274.557819 | 1369.895581 |             |
| 632.8842799                         | 680.8256087                                     | 657.414398  | 1247.084356 |             |
| 657.0414289                         | 0.924842735                                     | 1.35E-08    | 6.86E-07    | CDC45       |
| 22                                  | 19479459                                        | 19520612    | +           | 2846        |
| protein_coding                      | cell division cycle 45 [Source:HGNC             |             |             |             |
| Symbol;Acc:HGNC:1739]               | -                                               | 948         | 1375        | 1401        |
| 670                                 | 18.2166349                                      | 21.30108672 | 22.80371977 | 630         |
| 10.70303314                         | 11.40722413                                     | 10.98970267 |             | 745         |
| ENSG00000174442                     | 1937.910807                                     | 1560.985721 | 1725.814205 |             |
| 1054.807133                         | 838.9233675                                     | 858.5635795 | 1741.570244 |             |
| 917.43136                           | 0.924595326                                     | 1.38E-08    | 6.96E-07    | ZWILCH      |
| 15                                  | 66504959                                        | 66550128    | +           | 4849        |
| protein_coding                      | zwilch kinetochore protein [Source:HGNC         |             |             |             |
| Symbol;Acc:HGNC:25468]              | -                                               | 1675        | 1684        | 1765        |
| 875                                 | 18.89110405                                     | 15.31171585 | 16.86145242 | 1050        |
| 10.46979869                         | 8.249907798                                     | 8.423680859 |             | 918         |
| ENSG00000076706                     | 1885.847531                                     | 2641.810751 | 3327.44801  |             |
| 1147.22833                          | 1052.766579                                     | 1410.987917 | 2618.368764 |             |
| 1203.660942                         | 1.121674534                                     | 1.39E-08    | 6.99E-07    | MCAM        |
| 11                                  | 119308529                                       | 119321521   | -           | 7422        |
| protein_coding                      | melanoma cell adhesion molecule [Source:HGNC    |             |             |             |
| Symbol;Acc:HGNC:6934]               | -                                               | 1630        | 2850        | 3403        |
| 1438                                | 12.01050773                                     | 16.93003547 | 21.23945922 | 1142        |
| 7.43954492                          | 6.763790179                                     | 9.044487687 |             | 1152        |
| ENSG00000160570                     | 542.6150259                                     | 979.7873559 | 708.9038517 |             |
| 1673.627318                         | 1746.386226                                     | 1512.053116 | 743.7687445 |             |
| 1644.02222                          | -1.142940579                                    | 1.45E-08    | 7.30E-07    | DEDD2       |
| 19                                  | 42198598                                        | 42220140    | -           | 2631        |
| protein_coding                      | death effector domain containing 2 [Source:HGNC |             |             |             |
| Symbol;Acc:HGNC:24450]              | -                                               | 469         | 1057        | 725         |
| 1541                                | 9.748700033                                     | 17.71283582 | 12.76496459 | 1666        |
|                                     |                                                 |             |             | 1911        |

|                                                       |                                                   |             |             |             |            |        |
|-------------------------------------------------------|---------------------------------------------------|-------------|-------------|-------------|------------|--------|
| 30.61648757                                           | 31.65180174                                       | 27.3418456  |             |             |            |        |
| ENSG00000183087                                       | 2495.566335                                       | 2417.488575 | 3485.851354 |             |            |        |
| 1414.446137                                           | 1060.991318                                       | 1567.001185 | 2799.635421 |             |            |        |
| 1347.479546                                           | 1.055281112                                       | 1.49E-08    | 7.45E-07    |             |            | GAS6   |
| 13                                                    | 113820549                                         | 113864067   | -           | 6006        |            |        |
| protein_coding                                        | growth arrest specific 6 [Source:HGNC             |             |             |             |            |        |
| Symbol;Acc:HGNC:4168]                                 | -                                                 | 2157        | 2608        | 3565        | 1408       | 1161   |
| 1597                                                  | 19.64081613                                       | 19.14503732 | 27.49645224 |             |            |        |
| 11.3349222                                            | 8.423750393                                       | 12.41268185 |             |             |            |        |
| ENSG00000148773                                       | 5632.089437                                       | 5614.54306  | 11594.73362 |             |            |        |
| 1505.862755                                           | 1201.725739                                       | 1813.28628  | 7613.788705 |             |            |        |
| 1506.958258                                           | 2.337026035                                       | 1.52E-08    | 7.59E-07    |             |            | MKI67  |
| 10                                                    | 128096659                                         | 128126385   | -           | 12807       |            |        |
| protein_coding                                        | marker of proliferation Ki-67 [Source:HGNC        |             |             |             |            |        |
| Symbol;Acc:HGNC:7107]                                 | -                                                 | 4868        | 6057        | 11858       | 1499       | 1315   |
| 1848                                                  | 20.7872899                                        | 20.85182743 | 42.89103164 |             |            |        |
| 5.659205178                                           | 4.474421993                                       | 6.735976963 |             |             |            |        |
| ENSG00000204388                                       | 2570.768843                                       | 2867.98683  | 2254.803148 |             |            |        |
| 6745.742761                                           | 3849.177804                                       | 5228.897503 | 2564.519607 |             |            |        |
| 5274.606023                                           | -1.040239056                                      | 1.53E-08    | 7.60E-07    |             |            | HSPA1B |
| 6                                                     | 31827735                                          | 31830255    | +           | 2521        |            |        |
| protein_coding                                        | heat shock protein family A (Hsp70) member 1B     |             |             |             |            |        |
| [Source:HGNC Symbol;Acc:HGNC:5233]                    | -                                                 |             | 2222        | 3094        |            | 2306   |
| 6715                                                  | 4212                                              | 5329        | 48.20209582 | 54.11048439 |            |        |
| 42.37297073                                           | 128.7877002                                       | 72.80716399 | 98.67767548 |             |            |        |
| ENSG00000154898                                       | 38.1797353                                        | 36.15109449 | 59.64570339 |             |            | 0      |
| 0                                                     | 0                                                 | 44.65884439 | 0           | 7.974179537 |            |        |
| 1.63E-08                                              | 8.09E-07                                          | CCDC144CP   | 17          | 20321164    |            |        |
| 20403557                                              | +                                                 | 8145        |             |             |            |        |
| transcribed_processed_pseudogene                      | "coiled-coil domain containing                    |             |             |             |            |        |
| 144C, pseudogene [Source:HGNC Symbol;Acc:HGNC:29073]" | -                                                 |             |             |             |            | 33     |
| 39                                                    | 61                                                | 0           | 0           | 0           | 0.22157337 |        |
| 0.211109354                                           | 0.346929478                                       | 0           | 0           | 0           |            |        |
| ENSG00000151725                                       | 1586.194457                                       | 1268.069161 | 1371.851178 |             |            |        |
| 477.1746555                                           | 814.2491508                                       | 629.9403635 | 1408.704932 |             |            |        |
| 640.4547232                                           | 1.136262199                                       | 1.77E-08    | 8.75E-07    |             |            | CENPU  |
| 4                                                     | 184694618                                         | 184734133   | -           | 2953        |            |        |
| protein_coding                                        | centromere protein U [Source:HGNC                 |             |             |             |            |        |
| Symbol;Acc:HGNC:21348]                                | -                                                 | 1371        | 1368        | 1403        | 475        | 891    |
| 642                                                   | 25.39035193                                       | 20.42474337 | 22.00881601 |             |            |        |
| 7.777345262                                           | 13.1483984                                        | 10.1488683  |             |             |            |        |
| ENSG00000139289                                       | 8466.645543                                       | 7781.754827 | 6301.910792 |             |            |        |
| 13026.3658                                            | 14594.34224                                       | 11805.00391 | 7516.770387 |             |            |        |
| 13141.90399                                           | -0.806098384                                      | 1.85E-08    | 9.14E-07    |             |            | PHLDA1 |
| 12                                                    | 76025447                                          | 76033932    | -           | 8069        |            |        |
| protein_coding                                        | pleckstrin homology like domain family A member 1 |             |             |             |            |        |
| [Source:HGNC Symbol;Acc:HGNC:8933]                    | -                                                 |             | 7318        | 8395        |            | 6445   |
| 12967                                                 | 15970                                             | 12031       | 49.59836981 | 45.87065515 |            |        |
| 37.0003355                                            | 77.69999876                                       | 86.24696045 | 69.60301416 |             |            |        |
| ENSG00000119574                                       | 694.1770054                                       | 831.4751733 | 727.4820216 |             |            |        |

|                        |                                                       |                       |                     |        |
|------------------------|-------------------------------------------------------|-----------------------|---------------------|--------|
| 1380.290477            | 1350.684899                                           | 1382.532667           | 751.0447335         |        |
| 1371.169348            | -0.867718662                                          | 1.91E-08              | 9.41E-07            | ZBTB45 |
| 19                     | 58513530                                              | 58538911              | - 3418              |        |
| protein_coding         | zinc finger and BTB domain containing 45 [Source:HGNC |                       |                     |        |
| Symbol;Acc:HGNC:23715] | ZBTB                                                  | 600 897               | 744 1374            | 1478   |
| 1409                   | 9.600059058                                           | 11.57055904           | 10.08331496         |        |
| 19.4364028             | 18.84347403                                           | 19.24354016           |                     |        |
| ENSG00000143815        | 2185.500605                                           | 2156.088354           | 2900.150102         |        |
| 1320.015784            | 1292.197867                                           | 1324.640951           | 2413.91302          |        |
| 1312.284867            | 0.879447039                                           | 1.96E-08              | 9.59E-07            | LBR    |
| 1                      | 225401502                                             | 225428925             | - 5257              |        |
| protein_coding         | lamin B receptor [Source:HGNC                         | Symbol;Acc:HGNC:6518] |                     |        |
| -                      | 1889 2326                                             | 2966 1314             | 1414 1350           |        |
| 19.65118271            | 19.50768307                                           | 26.13578961           | 12.08533253         |        |
| 11.72114477            | 11.98786455                                           |                       |                     |        |
| ENSG00000128595        | 7914.774824                                           | 6950.279654           | 8345.509482         |        |
| 4876.22269             | 4890.064204                                           | 4485.136139           | 7736.854653         |        |
| 4750.474344            | 0.703612399                                           | 2.11E-08              | 1.03E-06            | CALU   |
| 7                      | 128739292                                             | 128771807             | + 4537              |        |
| protein_coding         | calumenin [Source:HGNC                                | Symbol;Acc:HGNC:1458] |                     | -      |
| 6841                   | 7498 8535                                             | 4854 5351             | 4571 82.46041647    |        |
|                        | 72.86359832 87.14394208                               | 51.72877682           | 51.39546142         |        |
|                        | 47.03146185                                           |                       |                     |        |
| ENSG00000231607        | 215.1948717                                           | 236.3725409           | 214.1378531         |        |
| 33.15108133            | 73.10879019                                           | 59.85414669           | 221.9017552         |        |
| 55.3713394             | 2.000200363                                           | 2.16E-08              | 1.05E-06            | DLEU2  |
| 13                     | 49982552                                              | 50125720              | - 5103              |        |
| antisense              | deleted in lymphocytic leukemia 2 [Source:HGNC        |                       |                     |        |
| Symbol;Acc:HGNC:13748] | -                                                     | 186 255               | 219 33              | 80     |
| 61                     | 1.993343244                                           | 2.203172845           | 1.988021159         |        |
| 0.312672429            | 0.683160923                                           | 0.558020691           |                     |        |
| ENSG00000104881        | 1126.880672                                           | 1881.710816           | 1375.762372         |        |
| 2910.263109            | 2715.991556                                           | 3241.936076           | 1461.451287         |        |
| 2956.06358             | -1.015476771                                          | 2.22E-08              | 1.08E-06            |        |
| PPP1R13L               | 19 45379634                                           | 45406349              | - 5032              |        |
| protein_coding         | protein phosphatase 1 regulatory subunit 13           |                       |                     |        |
| like [Source:HGNC      | Symbol;Acc:HGNC:18838]                                |                       | - 974 2030          |        |
| 1407                   | 2897 2972                                             | 3304 10.58554048      | 17.78645359         |        |
|                        | 12.95256919 27.83614431                               | 25.73752434           | 30.65105603         |        |
| ENSG00000122566        | 23173.94236                                           | 25406.80382           | 29312.44092         |        |
| 16385.67538            | 13498.62425                                           | 16272.47817           | 25964.3957          |        |
| 15385.5926             | 0.755003385                                           | 2.23E-08              | 1.08E-06            |        |
| HNRNPA2B1              | 7 26173057                                            | 26201529              | - 9267              |        |
| protein_coding         | heterogeneous nuclear ribonucleoprotein A2/B1         |                       |                     |        |
| [Source:HGNC           | Symbol;Acc:HGNC:5033]                                 |                       | - 20030 27409 29978 |        |
| 16311                  | 14771 16584                                           | 118.2051774           | 130.403121          |        |
| 149.8531747            | 85.10256328                                           | 69.45912897           | 83.54032527         |        |
| ENSG00000101868        | 1055.149048                                           | 1095.656248           | 1088.289637         |        |
| 564.5729608            | 503.5367925                                           | 628.959148            | 1079.698311         |        |
| 565.6896337            | 0.932961081                                           | 2.26E-08              | 1.09E-06            | POLA1  |

|                 |                                                                                    |              |          |             |             |        |
|-----------------|------------------------------------------------------------------------------------|--------------|----------|-------------|-------------|--------|
|                 | X                                                                                  | 24693919     | 24996986 | +           | 6336        |        |
| protein_coding  | "DNA polymerase alpha 1, catalytic subunit [Source:HGNC Symbol;Acc:HGNC:9173]"     |              |          |             |             |        |
|                 |                                                                                    |              | -        | 912         | 1182        | 1113   |
|                 | 562                                                                                | 551          | 641      | 7.871806002 | 8.225006805 |        |
| 8.137339797     |                                                                                    | 4.288667369  |          | 3.789614453 | 4.722684102 |        |
| ENSG00000203805 |                                                                                    | 500.9644056  |          | 225.2491272 | 374.4967934 |        |
| 79.36167954     |                                                                                    | 30.15737595  |          | 116.7646468 | 366.9034421 |        |
| 75.42790077     |                                                                                    | 2.283392488  |          | 2.29E-08    | 1.10E-06    | PLPP4  |
|                 | 10                                                                                 | 120456954    |          | 120589855   | +           | 1785   |
| protein_coding  | phospholipid phosphatase 4 [Source:HGNC Symbol;Acc:HGNC:23531]                     |              |          |             |             |        |
|                 |                                                                                    |              | -        | 433         | 243         | 383    |
|                 | 119                                                                                | 13.26613427  |          | 6.002083198 | 9.939465013 | 33     |
| 2.13988329      |                                                                                    | 0.805627565  |          | 3.112108837 |             |        |
| ENSG00000115461 |                                                                                    | 142.3062861  |          | 99.18377207 | 80.17947013 |        |
| 282.2864804     |                                                                                    | 319.8509571  |          | 444.4906303 | 107.2231761 |        |
| 348.8760226     |                                                                                    | -1.706006096 |          | 2.39E-08    | 1.15E-06    | IGFBP5 |
|                 | 2                                                                                  | 216672105    |          | 216695525   | -           | 6442   |
| protein_coding  | insulin like growth factor binding protein 5 [Source:HGNC Symbol;Acc:HGNC:5474]    |              |          |             |             |        |
|                 |                                                                                    |              | -        | 123         | 107         | 82     |
|                 | 281                                                                                | 350          | 453      | 1.044188976 | 0.732313458 |        |
| 0.589651744     |                                                                                    | 2.109049709  |          | 2.367586863 | 3.282641966 |        |
| ENSG00000117906 |                                                                                    | 2577.710613  |          | 2174.627376 | 2350.627392 |        |
| 1258.736512     |                                                                                    | 1502.385638  |          | 1136.247572 | 2367.655127 |        |
| 1299.123241     |                                                                                    | 0.865445367  |          | 2.43E-08    | 1.16E-06    | RCN2   |
|                 | 15                                                                                 | 76931619     |          | 76954392    | +           | 10019  |
| protein_coding  | reticulocalbin 2 [Source:HGNC Symbol;Acc:HGNC:9935]                                |              |          |             |             |        |
|                 |                                                                                    |              | -        | 2228        | 2346        | 2404   |
|                 |                                                                                    |              |          | 1253        | 1644        | 1158   |
| 12.16145459     |                                                                                    | 10.32375262  |          | 11.11507871 | 6.046832114 |        |
| 7.150493799     |                                                                                    | 5.395481635  |          |             |             |        |
| ENSG00000179300 |                                                                                    | 149.2480562  |          | 177.974619  | 301.1619122 |        |
| 32.1465031      |                                                                                    | 24.67421669  |          | 62.79779325 | 209.4615291 |        |
| 39.87283768     |                                                                                    | 2.39582265   |          | 2.51E-08    | 1.19E-06    | RTL3   |
|                 | X                                                                                  | 78656069     |          | 78659328    | -           | 2648   |
| protein_coding  | retrotransposon Gag like 3 [Source:HGNC Symbol;Acc:HGNC:22997]                     |              |          |             |             |        |
|                 |                                                                                    |              | -        | 129         | 192         | 308    |
|                 | 64                                                                                 | 2.664197658  |          | 3.196812803 | 5.388094345 | 32     |
| 0.584296405     |                                                                                    | 0.444328715  |          | 1.12825698  |             | 27     |
| ENSG00000075426 |                                                                                    | 1759.738709  |          | 1713.005708 | 2623.433151 |        |
| 996.5415962     |                                                                                    | 764.9007174  |          | 1086.20558  | 2032.059189 |        |
| 949.2159646     |                                                                                    | 1.098525186  |          | 2.57E-08    | 1.22E-06    | FOSL2  |
|                 | 2                                                                                  | 28392448     |          | 28417312    | +           | 7157   |
| protein_coding  | "FOS like 2, AP-1 transcription factor subunit [Source:HGNC Symbol;Acc:HGNC:3798]" |              |          |             |             |        |
|                 |                                                                                    |              | TF_bZIP  | 1521        | 1848        | 2683   |
|                 | 992                                                                                | 837          | 1107     | 11.62232216 | 11.38426267 |        |
| 17.36569269     |                                                                                    | 6.701651987  |          | 5.096277155 | 7.220422976 |        |
| ENSG00000137563 |                                                                                    | 1989.974082  |          | 1776.965337 | 1782.526513 |        |
| 673.0674088     |                                                                                    | 1139.583267  |          | 864.4508727 | 1849.821977 |        |
| 892.3671828     |                                                                                    | 1.051013204  |          | 2.74E-08    | 1.29E-06    | GGH    |
|                 | 8                                                                                  | 63015079     |          | 63039171    | -           | 3130   |
| protein_coding  | gamma-glutamyl hydrolase [Source:HGNC                                              |              |          |             |             |        |

|                                                      |                                                    |             |      |                |      |        |
|------------------------------------------------------|----------------------------------------------------|-------------|------|----------------|------|--------|
| Symbol;Acc:HGNC:4248]                                | -                                                  | 1720        | 1917 | 1823           | 670  | 1247   |
| 881                                                  | 30.05237657                                        | 27.0029824  |      | 26.98017653    |      |        |
| 10.34979342                                          | 17.36123892                                        | 13.13946271 |      |                |      |        |
| ENSG00000186815                                      | 1221.75153                                         | 1477.560119 |      | 1977.108397    |      |        |
| 780.5572785                                          | 662.5484111                                        | 787.9160621 |      | 1558.806682    |      |        |
| 743.6739173                                          | 1.06832556                                         | 2.76E-08    |      | 1.30E-06       |      | TPCN1  |
| 12                                                   | 113221050                                          | 113298585   |      | + 8728         |      |        |
| protein_coding                                       | two pore segment channel 1 [Source:HGNC            |             |      |                |      |        |
| Symbol;Acc:HGNC:18182]                               | -                                                  | 1056        | 1594 | 2022           | 777  | 725    |
| 803                                                  | 6.616737313                                        | 8.052069921 |      | 10.73170855    |      |        |
| 4.304349205                                          | 3.619777421                                        | 4.294838559 |      |                |      |        |
| ENSG00000102054                                      | 3006.943395                                        | 2849.447807 |      | 3055.620051    |      |        |
| 1450.610953                                          | 1831.375194                                        | 1839.779099 |      | 2970.670418    |      |        |
| 1707.255082                                          | 0.798906005                                        | 2.90E-08    |      | 1.37E-06       |      | RBBP7  |
| X                                                    | 16839283                                           | 16870414    |      | - 7392         |      |        |
| protein_coding                                       | "RB binding protein 7, chromatin remodeling factor |             |      |                |      |        |
| [Source:HGNC Symbol;Acc:HGNC:9890]"                  | -                                                  |             |      | 2599           | 3074 | 3125   |
| 1444                                                 | 2004 1875                                          | 19.22821786 |      | 18.33478674    |      |        |
| 19.58350933                                          | 9.445097632                                        | 11.81392901 |      | 11.84091735    |      |        |
| ENSG00000210135                                      | 258.0024537                                        | 557.0976356 |      | 362.7632124    |      |        |
| 1120.104718                                          | 858.1144249                                        | 1073.449778 |      | 392.6211006    |      |        |
| 1017.222974                                          | -1.371037488                                       | 2.94E-08    |      | 1.38E-06       |      | MT-TN  |
| MT                                                   | 5657 5729                                          | - 73        |      | Mt_tRNA        |      |        |
| mitochondrially encoded tRNA asparagine [Source:HGNC |                                                    |             |      |                |      |        |
| Symbol;Acc:HGNC:7493]                                | -                                                  | 223         | 601  | 371            | 1115 | 939    |
| 1094                                                 | 167.0616305                                        | 362.9824017 |      | 235.4255021    |      |        |
| 738.5046322                                          | 560.5331861                                        | 699.5850139 |      |                |      |        |
| ENSG00000071539                                      | 1566.526109                                        | 1540.592796 |      | 1648.56813     |      |        |
| 873.9830532                                          | 965.9498904                                        | 723.1558378 |      | 1585.229012    |      |        |
| 854.3629271                                          | 0.891534394                                        | 2.97E-08    |      | 1.39E-06       |      | TRIP13 |
| 5                                                    | 892643 919357                                      | + 3560      |      | protein_coding |      |        |
| thyroid hormone receptor interactor 13 [Source:HGNC  |                                                    |             |      |                |      |        |
| Symbol;Acc:HGNC:12307]                               | -                                                  | 1354        | 1662 | 1686           | 870  | 1057   |
| 737                                                  | 20.80000211                                        | 20.58329884 |      | 21.93865649    |      |        |
| 11.8159997                                           | 12.93848978                                        | 9.664146964 |      |                |      |        |
| ENSG00000147862                                      | 317.0074991                                        | 350.3875312 |      | 508.4551764    |      |        |
| 149.6821551                                          | 141.648281                                         | 127.5580175 |      | 391.9500689    |      |        |
| 139.6294845                                          | 1.489813873                                        | 2.98E-08    |      | 1.39E-06       |      | NFIB   |
| 9                                                    | 14081843                                           | 14398983    |      | - 12765        |      |        |
| protein_coding                                       | nuclear factor I B [Source:HGNC                    |             |      |                |      |        |
| CTF/NFI                                              | 274 378                                            | 520 149     |      | 155 130        |      |        |
| 1.173882035                                          | 1.305584359                                        | 1.887056834 |      | 0.564373568    |      |        |
| 0.52913864                                           | 0.475410281                                        |             |      |                |      |        |
| ENSG00000173039                                      | 2493.252411                                        | 3481.628485 |      | 2914.817079    |      |        |
| 5263.989883                                          | 5046.334243                                        | 5185.72402  |      | 2963.232658    |      |        |
| 5165.349382                                          | -0.801282712                                       | 3.03E-08    |      | 1.41E-06       |      | RELA   |
| 11                                                   | 65653596                                           | 65663094    |      | - 5464         |      |        |
| protein_coding                                       | "RELA proto-oncogene, NF-kB subunit [Source:HGNC   |             |      |                |      |        |
| Symbol;Acc:HGNC:9955]"                               | RHD                                                | 2155 3756   |      | 2981 5240      |      | 5522   |
| 5285                                                 | 21.56906387                                        | 30.30741186 |      | 25.27282215    |      |        |

|                 |                                                  |             |             |             |                |             |
|-----------------|--------------------------------------------------|-------------|-------------|-------------|----------------|-------------|
| 46.36836824     | 44.03969569                                      | 45.15234774 |             |             |                |             |
| ENSG00000135636 | 67.10377719                                      | 106.5993812 | 69.42368755 | 0           |                |             |
|                 | 10.05245865                                      | 2.943646558 | 81.04228198 | 4.33203507  |                |             |
|                 | 4.202819519                                      | 3.14E-08    | 1.45E-06    | DYSF        | 2              |             |
|                 | 71453722                                         | 71686768    | +           | 8386        | protein_coding |             |
|                 | dysferlin [Source:HGNC Symbol;Acc:HGNC:3097]     |             |             | -           | 58             |             |
|                 | 115                                              | 71          | 0           | 11          | 3              | 0.378240343 |
| 0.604612247     | 0.392198516                                      | 0           | 0.057160553 | 0.016699845 |                |             |
| ENSG00000225190 | 826.0706365                                      | 1016.865402 | 931.8418906 |             |                |             |
| 1543.032149     | 1896.259246                                      | 1662.17909  | 924.9259762 |             |                |             |
| 1700.490162     | -0.878016839                                     | 3.15E-08    | 1.45E-06    |             |                |             |
| PLEKHM1         | 17                                               | 45435900    | 45490749    | -           | 9233           |             |
| protein_coding  | pleckstrin homology and RUN domain containing M1 |             |             |             |                |             |
|                 | [Source:HGNC Symbol;Acc:HGNC:29017]              |             |             | -           | 714            | 1097        |
|                 | 1536                                             | 2075        | 1694        | 4.229120785 | 5.238389051    |             |
| 4.781371856     | 8.043583909                                      | 9.793408346 | 8.564787777 |             |                |             |
| ENSG00000082898 | 6211.727237                                      | 5458.815268 | 6209.997741 |             |                |             |
| 3872.649046     | 3674.630567                                      | 3633.441069 | 5960.180082 |             |                |             |
| 3726.906894     | 0.677310497                                      | 3.26E-08    | 1.50E-06    |             | XP01           |             |
|                 | 2                                                | 61477849    | 61538626    | -           | 11708          |             |
| protein_coding  | exportin 1 [Source:HGNC Symbol;Acc:HGNC:12825]   |             |             |             | -              |             |
|                 | 5369                                             | 5889        | 6351        | 3855        | 4021           | 3703        |
|                 | 22.17648947                                      | 25.12822747 | 15.91999346 | 14.96614529 |                |             |
|                 | 14.76444186                                      |             |             |             |                |             |
| ENSG00000146834 | 1528.346374                                      | 1956.793858 | 2165.823492 |             |                |             |
| 3779.223271     | 3036.756373                                      | 3657.971457 | 1883.654575 |             |                |             |
| 3491.317033     | -0.889674661                                     | 3.38E-08    | 1.55E-06    |             | MEPCE          |             |
|                 | 7                                                | 100428790   | 100434126   | +           | 3420           |             |
| protein_coding  | methylphosphate capping enzyme [Source:HGNC      |             |             |             |                |             |
|                 | Symbol;Acc:HGNC:20247]                           |             |             | -           | 1321           | 2111        |
|                 | 3728                                             | 21.12376972 | 27.21423215 | 30.00199127 |                | 3323        |
| 53.18558024     | 42.34116789                                      | 50.88570941 |             |             |                |             |
| ENSG00000154096 | 422.2910116                                      | 454.206059  | 693.2590771 |             |                |             |
| 136.6226382     | 193.738294                                       | 224.698354  | 523.2520492 |             |                |             |
| 185.0197621     | 1.499880718                                      | 3.47E-08    | 1.59E-06    |             | THY1           |             |
|                 | 11                                               | 119417378   | 119424985   | -           | 5925           |             |
| protein_coding  | Thy-1 cell surface antigen [Source:HGNC          |             |             |             |                |             |
|                 | Symbol;Acc:HGNC:11801]                           |             |             | -           | 365            | 490         |
|                 | 229                                              | 3.368986126 | 3.646210046 | 5.543197294 |                | 212         |
| 1.109818015     | 1.559215358                                      | 1.80423525  |             |             |                |             |
| ENSG00000154133 | 726.5719323                                      | 977.0065025 | 732.3710137 |             |                |             |
| 1301.933376     | 2011.40559                                       | 1818.192358 | 811.9831495 |             |                |             |
| 1710.510441     | -1.07446448                                      | 3.60E-08    | 1.64E-06    |             | ROB04          |             |
|                 | 11                                               | 124883691   | 124898500   | -           | 7033           |             |
| protein_coding  | roundabout guidance receptor 4 [Source:HGNC      |             |             |             |                |             |
|                 | Symbol;Acc:HGNC:17985]                           |             |             | -           | 628            | 1054        |
|                 | 1853                                             | 4.883303751 | 6.607451004 | 4.933369632 |                | 2201        |
| 8.909751689     | 13.63760235                                      | 12.29931254 |             |             |                |             |
| ENSG00000112186 | 399.1517781                                      | 355.9492381 | 398.9417538 |             |                |             |
| 169.7737195     | 122.4572236                                      | 156.0132676 | 384.6809233 |             |                |             |

|                                               |                                                  |             |             |                                      |
|-----------------------------------------------|--------------------------------------------------|-------------|-------------|--------------------------------------|
| 149.4147369                                   | 1.365100733                                      | 3.70E-08    | 1.68E-06    | CAP2                                 |
| 6                                             | 17393216                                         | 17557792    | +           | 3637                                 |
| protein_coding                                | cyclase associated actin cytoskeleton regulatory |             |             |                                      |
| protein_2 [Source:HGNC Symbol;Acc:HGNC:20039] | -                                                |             | 345         | 384                                  |
| 408                                           | 169                                              | 134         | 159         | 5.187648081                          |
|                                               | 5.196600345                                      | 2.246697593 | 1.605536174 | 2.040797244                          |
| ENSG00000229689                               | 570.3821061                                      | 533.9238571 | 352.0074298 |                                      |
| 1190.425193                                   | 996.1072664                                      | 1008.689554 | 485.4377977 |                                      |
| 1065.074004                                   | -1.134315132                                     | 3.75E-08    | 1.70E-06    |                                      |
| AC009237.3                                    | 2                                                | 95525345    | 95532405    | +                                    |
|                                               | transcribed_unprocessed_pseudogene               |             |             | Ankyrin repeat domain-               |
| containing protein pseudogene                 | -                                                | 493         | 576         | 360                                  |
|                                               | 1090                                             | 1028        | 5.416100816 | 5.101542971                          |
|                                               | 11.50971777                                      | 9.541797673 | 9.640160359 | 3.350040553                          |
| ENSG00000137845                               | 1836.098179                                      | 1522.053773 | 1996.664366 |                                      |
| 1043.756773                                   | 822.4738897                                      | 972.3845798 | 1784.938773 |                                      |
| 946.2050807                                   | 0.915759743                                      | 3.77E-08    | 1.71E-06    | ADAM10                               |
| 15                                            | 58588807                                         | 58749978    | -           | 16168                                |
| protein_coding                                | ADAM metalloproteinase domain 10 [Source:HGNC    |             |             |                                      |
| Symbol;Acc:HGNC:188]                          | -                                                | 1587        | 1642        | 2042                                 |
|                                               | 991                                              | 5.368035002 | 4.477656874 | 5.850620022                          |
| 3.107137436                                   | 2.425743111                                      | 2.861299967 |             |                                      |
| ENSG00000188643                               | 8328.967103                                      | 9085.048131 | 7252.330853 |                                      |
| 12311.10611                                   | 14712.23017                                      | 13819.43938 | 8222.115363 |                                      |
| 13614.25855                                   | -0.727544555                                     | 3.81E-08    | 1.72E-06    |                                      |
| S100A16 1                                     | 153606886                                        | 153613145   | -           | 1701                                 |
| protein_coding                                | S100 calcium binding protein A16 [Source:HGNC    |             |             |                                      |
| Symbol;Acc:HGNC:20441]                        | -                                                | 7199        | 9801        | 7417                                 |
|                                               | 14084                                            | 231.4528712 | 254.0387889 | 201.9883964                          |
| 348.3455111                                   | 412.4327885                                      | 386.5162333 |             |                                      |
| ENSG00000203706                               | 77.51643227                                      | 104.7454789 | 94.84644637 |                                      |
| 8.036625776                                   | 11.88017841                                      | 15.69944831 | 92.36945252 |                                      |
| 11.87208416                                   | 2.959667438                                      | 3.91E-08    | 1.76E-06    |                                      |
| SERTAD4-AS1                                   | 1                                                | 210231456   | 210234047   | -                                    |
|                                               | antisense                                        |             |             | SERTAD4 antisense RNA 1 [Source:HGNC |
| Symbol;Acc:HGNC:32019]                        | -                                                | 67          | 113         | 97                                   |
|                                               | 16                                               | 3.649520459 | 4.962250551 | 4.475488827                          |
| 0.385263167                                   | 0.564245673                                      | 0.743930399 |             |                                      |
| ENSG00000188610                               | 285.7695339                                      | 369.8535052 | 551.4783067 |                                      |
| 157.7187809                                   | 98.69686676                                      | 124.614371  | 402.3671153 |                                      |
| 127.0100062                                   | 1.665600416                                      | 3.99E-08    | 1.79E-06    | FAM72B                               |
| 1                                             | 121167646                                        | 121185539   | -           | 3033                                 |
| protein_coding                                | family with sequence similarity 72 member B      |             |             |                                      |
| [Source:HGNC Symbol;Acc:HGNC:24805]           | -                                                |             | 247         | 399                                  |
|                                               | 157                                              | 108         | 127         | 4.453682525                          |
| 8.614084933                                   | 2.502813326                                      | 1.551707799 | 1.954687548 |                                      |
| ENSG00000179750                               | 189.7417148                                      | 420.8358179 | 439.0314889 |                                      |
| 61.27927154                                   | 109.6631853                                      | 102.046414  | 349.8696739 |                                      |
| 90.99629029                                   | 1.943195616                                      | 4.14E-08    | 1.85E-06    |                                      |
| APOBEC3B                                      | 22                                               | 38982347    | 38992804    | +                                    |
|                                               |                                                  |             |             | 1896                                 |

|                                                |                                                     |             |             |             |             |             |  |
|------------------------------------------------|-----------------------------------------------------|-------------|-------------|-------------|-------------|-------------|--|
| protein_coding                                 | apolipoprotein B mRNA editing enzyme catalytic      |             |             |             |             |             |  |
| subunit 3B [Source:HGNC Symbol;Acc:HGNC:17352] | -                                                   | 164         | 454         |             |             |             |  |
| 449                                            | 61                                                  | 120         | 104         | 4.730425725 | 10.55726633 |             |  |
| 10.9700969                                     | 1.555581317                                         | 2.758046035 | 2.560595879 |             |             |             |  |
| ENSG00000134243                                | 1551.485607                                         | 1820.532041 | 2267.514527 |             |             |             |  |
| 1015.628582                                    | 980.5716485                                         | 654.4707515 | 1879.844058 |             |             |             |  |
| 883.5569941                                    | 1.089411728                                         | 4.37E-08    | 1.95E-06    |             |             | SORT1       |  |
| 1                                              | 109309568                                           | 109397951   | -           | 9160        |             |             |  |
| protein_coding                                 | sortilin 1 [Source:HGNC Symbol;Acc:HGNC:11186]      |             |             |             | -           |             |  |
| 1341                                           | 1964                                                | 2319        | 1011        | 1073        | 667         | 8.006229165 |  |
| 9.453224411                                    | 11.72756182                                         | 5.336504726 | 5.104613281 |             |             |             |  |
| 3.39919748                                     |                                                     |             |             |             |             |             |  |
| ENSG00000038427                                | 440.8023984                                         | 324.4328993 | 622.8575911 |             |             |             |  |
| 113.5173391                                    | 120.6295038                                         | 201.1491815 | 462.6976296 |             |             |             |  |
| 145.0986748                                    | 1.673227989                                         | 4.54E-08    | 2.02E-06    |             |             | VCAN        |  |
| 5                                              | 83471465                                            | 83582303    | +           | 14831       |             |             |  |
| protein_coding                                 | versican [Source:HGNC Symbol;Acc:HGNC:2464]         |             |             |             | -           |             |  |
| 381                                            | 350                                                 | 637         | 113         | 132         | 205         | 1.404912425 |  |
| 1.040474803                                    | 1.989626026                                         | 0.368391181 | 0.38784848  |             |             |             |  |
| 0.645252153                                    |                                                     |             |             |             |             |             |  |
| ENSG00000107438                                | 1126.880672                                         | 1065.066861 | 1369.895581 |             |             |             |  |
| 572.6095866                                    | 640.6157741                                         | 648.5834584 | 1187.281038 |             |             |             |  |
| 620.6029397                                    | 0.935849757                                         | 4.61E-08    | 2.04E-06    |             |             | PDLIM1      |  |
| 10                                             | 95237572                                            | 95291024    | -           | 2239        |             |             |  |
| protein_coding                                 | PDZ and LIM domain 1 [Source:HGNC                   |             |             |             |             |             |  |
| Symbol;Acc:HGNC:2067]                          | -                                                   | 974         | 1149        | 1401        | 570         | 701         |  |
| 661                                            | 23.79028123                                         | 22.62558896 | 28.98588051 |             |             |             |  |
| 12.30897752                                    | 13.64339718                                         | 13.78140202 |             |             |             |             |  |
| ENSG00000129173                                | 340.1467327                                         | 354.0953358 | 525.0777495 |             |             |             |  |
| 166.7599849                                    | 133.4235421                                         | 79.47845708 | 406.4399393 |             |             |             |  |
| 126.5539947                                    | 1.683890038                                         | 4.84E-08    | 2.14E-06    |             |             | E2F8        |  |
| 11                                             | 19224063                                            | 19241620    | -           | 4140        |             |             |  |
| protein_coding                                 | E2F transcription factor 8 [Source:HGNC             |             |             |             |             |             |  |
| Symbol;Acc:HGNC:24727]                         | E2F                                                 | 294         | 382         | 537         | 166         | 146         |  |
| 81                                             | 3.883664471                                         | 4.068150206 | 6.008642986 |             |             |             |  |
| 1.938692648                                    | 1.536777921                                         | 0.913336289 |             |             |             |             |  |
| ENSG00000197363                                | 274.1999171                                         | 327.2137527 | 310.9398963 |             |             |             |  |
| 644.9392185                                    | 583.9564617                                         | 701.5690964 | 304.1178554 |             |             |             |  |
| 643.4882589                                    | -1.079954169                                        | 4.87E-08    | 2.14E-06    |             |             | ZNF517      |  |
| 8                                              | 144798876                                           | 144811169   | +           | 5308        |             |             |  |
| protein_coding                                 | zinc finger protein 517 [Source:HGNC                |             |             |             |             |             |  |
| Symbol;Acc:HGNC:27984]                         | zf-C2H2                                             | 237         | 353         | 318         | 642         | 639         |  |
| 715                                            | 2.441811555                                         | 2.932093054 | 2.775227955 |             |             |             |  |
| 5.847972617                                    | 5.246003086                                         | 6.288124958 |             |             |             |             |  |
| ENSG00000144057                                | 505.5922523                                         | 239.1533943 | 638.5023658 |             |             |             |  |
| 176.8057671                                    | 85.90282848                                         | 93.21547435 | 461.0826708 |             |             |             |  |
| 118.6413566                                    | 1.959202241                                         | 5.10E-08    | 2.24E-06    |             |             |             |  |
| ST6GAL2 2                                      | 106801600                                           | 106887108   | -           | 7708        |             |             |  |
| protein_coding                                 | "ST6 beta-galactoside alpha-2,6-sialyltransferase 2 |             |             |             |             |             |  |
| [Source:HGNC Symbol;Acc:HGNC:10861]"           | -                                                   | 437         | 258         | 653         |             |             |  |



|                                     |                                                                                              |       |             |             |             |
|-------------------------------------|----------------------------------------------------------------------------------------------|-------|-------------|-------------|-------------|
| 176                                 | 94                                                                                           | 95    | 3.100519333 | 1.475747166 |             |
| 3.924406001                         | 1.104007893                                                                                  |       | 0.531428382 | 0.575344459 |             |
| ENSG00000173207                     | 1876.591838                                                                                  |       | 2415.634673 | 2275.336914 |             |
| 1047.775086                         | 1285.800848                                                                                  |       | 1273.617744 | 2189.187808 |             |
| 1202.397892                         | 0.864689421                                                                                  |       | 5.18E-08    | 2.27E-06    | CKS1B       |
| 1                                   | 154974653                                                                                    |       | 154979249   | + 2338      |             |
| protein_coding                      | CDC28 protein kinase regulatory subunit 1B                                                   |       |             |             |             |
| [Source:HGNC Symbol;Acc:HGNC:19083] |                                                                                              |       | -           | 1622 2606   | 2327        |
| 1043                                | 1407                                                                                         | 1298  | 37.94032579 | 49.14324866 |             |
| 46.10566944                         | 21.5695467                                                                                   |       | 26.22455868 | 25.91649233 |             |
| ENSG00000131473                     | 10987.66503                                                                                  |       | 11129.90235 | 13073.16482 |             |
| 7526.300039                         | 6501.199168                                                                                  |       | 7598.532983 | 11730.24407 |             |
| 7208.677397                         | 0.702498462                                                                                  |       | 5.47E-08    | 2.39E-06    | ACLY        |
| 17                                  | 41866908                                                                                     |       | 41930542    | - 5217      |             |
| protein_coding                      | ATP citrate lyase [Source:HGNC Symbol;Acc:HGNC:115]                                          |       |             |             |             |
| -                                   | 9497                                                                                         | 12007 | 13370 7492  | 7114 7744   |             |
| 99.5543667                          | 101.4723298                                                                                  |       | 118.7170309 | 69.43495342 |             |
| 59.42259613                         | 69.29318814                                                                                  |       |             |             |             |
| ENSG00000106462                     | 1118.78194                                                                                   |       | 1196.693923 | 1364.028791 |             |
| 652.9758443                         | 713.7245643                                                                                  |       | 610.3160531 | 1226.501551 |             |
| 659.0054872                         | 0.896266577                                                                                  |       | 5.50E-08    | 2.39E-06    | EZH2        |
| 7                                   | 148807383                                                                                    |       | 148884321   | - 4522      |             |
| protein_coding                      | enhancer of zeste 2 polycomb repressive complex 2 subunit [Source:HGNC Symbol;Acc:HGNC:3527] |       |             |             |             |
| 1395                                | 650                                                                                          | 781   | 622         | 11.69474156 | 12.58721476 |
| 14.2904566                          | 6.949987366                                                                                  |       | 7.526257511 | 6.421047202 |             |
| ENSG00000121060                     | 2346.318278                                                                                  |       | 2723.382452 | 2366.272167 |             |
| 4932.47907                          | 3694.735484                                                                                  |       | 4274.174803 | 2478.657632 |             |
| 4300.463119                         | -0.79465757                                                                                  |       | 5.89E-08    | 2.56E-06    | TRIM25      |
| 17                                  | 56836387                                                                                     |       | 56914080    | - 9501      |             |
| protein_coding                      | tripartite motif containing 25 [Source:HGNC Symbol;Acc:HGNC:12932]                           |       |             |             |             |
| 4356                                | 11.67329189                                                                                  |       | 13.6337847  | 11.79908972 |             |
| 24.98695821                         | 18.54355604                                                                                  |       | 21.4025041  |             |             |
| ENSG00000150093                     | 12239.49757                                                                                  |       | 10246.51791 | 12085.58842 |             |
| 6955.699609                         | 7149.125821                                                                                  |       | 7601.476629 | 11523.86797 |             |
| 7235.43402                          | 0.671409455                                                                                  |       | 5.91E-08    | 2.56E-06    | ITGB1       |
| 10                                  | 32900319                                                                                     |       | 33005792    | - 6011      |             |
| protein_coding                      | integrin subunit beta 1 [Source:HGNC Symbol;Acc:HGNC:6153]                                   |       |             |             |             |
| 7747                                | 96.24819682                                                                                  |       | 10579 11054 | 12360 6924  | 7823        |
| 55.69440232                         | 56.71333676                                                                                  |       | 81.07868386 | 95.2520209  |             |
| ENSG00000198836                     | 3306.596469                                                                                  |       | 60.16346821 |             |             |
| 2024.225117                         | 1998.611552                                                                                  |       | 2934.727312 | 3400.782891 |             |
| 1915.937851                         | 0.746200525                                                                                  |       | 1724.976883 | 3214.035558 |             |
| 3                                   | 193593144                                                                                    |       | 6.14E-08    | 2.65E-06    | OPA1        |
| protein_coding                      | "OPA1, mitochondrial dynamin like GTPase [Source:HGNC Symbol;Acc:HGNC:8140]"                 |       |             |             |             |
| 1758                                | 17.2668212                                                                                   |       | 2858 3166   | 3478 2015   | 2187        |
| 10.76295989                         | 10.52841113                                                                                  |       | 15.42056631 | 17.79866743 |             |
|                                     |                                                                                              |       | 9.066096999 |             |             |

|                                     |                                                   |             |                 |             |
|-------------------------------------|---------------------------------------------------|-------------|-----------------|-------------|
| ENSG00000179218                     | 13833.79076                                       | 15382.75418 | 20156.33655     |             |
| 7886.943621                         | 8824.230976                                       | 10454.85136 | 16457.62716     |             |
| 9055.341986                         | 0.86195169                                        | 6.36E-08    | 2.74E-06        | CALR        |
| 19                                  | 12938578                                          | 12944489    | + 2714          |             |
| protein_coding                      | calreticulin [Source:HGNC Symbol;Acc:HGNC:1455] - |             |                 |             |
| 11957                               | 16595                                             | 20614       | 7851 9656 10655 | 240.9389973 |
|                                     | 269.5885056                                       | 351.8478359 | 139.8673513     | 155.0408039 |
|                                     | 183.2692686                                       |             |                 |             |
| ENSG00000166451                     | 1084.07309                                        | 843.5255382 | 908.3747286     |             |
| 446.0327306                         | 514.503111                                        | 481.7768201 | 945.3244523     |             |
| 480.7708872                         | 0.974488711                                       | 6.51E-08    | 2.80E-06        | CENPN       |
| 16                                  | 81006498                                          | 81033114    | + 3568          |             |
| protein_coding                      | centromere protein N [Source:HGNC                 |             |                 |             |
| Symbol;Acc:HGNC:30873]              | -                                                 | 937 910     | 929 444         | 563         |
| 491                                 | 14.36181929                                       | 11.24476813 | 12.0612779      |             |
| 6.016713623                         | 6.876099411                                       | 6.423957843 |                 |             |
| ENSG00000104415                     | 2200.541107                                       | 1392.280614 | 2617.56636      |             |
| 513.3394715                         | 183.6858354                                       | 294.3646558 | 2070.12936      |             |
| 330.4633209                         | 2.647476809                                       | 6.66E-08    | 2.85E-06        | WISP1       |
| 8                                   | 133191039                                         | 133231690   | + 5190          |             |
| protein_coding                      | WNT1 inducible signaling pathway protein 1        |             |                 |             |
| [Source:HGNC Symbol;Acc:HGNC:12769] | -                                                 |             | 1902 1502       | 2677        |
| 511                                 | 201 300                                           | 20.04185277 | 12.75958451     |             |
| 23.89370344                         | 4.760523998                                       | 1.687669094 | 2.698360263     |             |
| ENSG00000146576                     | 1641.728618                                       | 1894.688132 | 1589.900225     |             |
| 3011.72551                          | 2848.501238                                       | 2714.042127 | 1708.772325     |             |
| 2858.089625                         | -0.741815864                                      | 6.96E-08    | 2.97E-06        |             |
| C7orf26 7                           | 6590017 6608726                                   | + 2728      | protein_coding  |             |
| chromosome 7 open reading frame 26  | [Source:HGNC                                      |             |                 |             |
| Symbol;Acc:HGNC:21702]              | -                                                 | 1419 2044   | 1626 2998       | 3117        |
| 2766                                | 28.44675564                                       | 33.03470884 | 27.61077717     |             |
| 53.1359536                          | 49.79102125                                       | 47.3318899  |                 |             |
| ENSG00000113645                     | 439.6454368                                       | 582.1253165 | 794.9501123     |             |
| 266.2132288                         | 230.2926891                                       | 229.6044316 | 605.5736219     |             |
| 242.0367832                         | 1.324201647                                       | 7.31E-08    | 3.11E-06        | WWC1        |
| 5                                   | 168291651                                         | 168472303   | + 10076         |             |
| protein_coding                      | WW and C2 domain containing 1 [Source:HGNC        |             |                 |             |
| Symbol;Acc:HGNC:29435]              | -                                                 | 380 628     | 813 265         | 252         |
| 234                                 | 2.062481922                                       | 2.747928592 | 3.73770346      |             |
| 1.271624631                         | 1.089860668                                       | 1.084110959 |                 |             |
| ENSG00000138166                     | 1014.65539                                        | 1121.61088  | 792.0167171     |             |
| 1752.988997                         | 1938.2968                                         | 1749.507271 | 976.094329      |             |
| 1813.59769                          | -0.893820805                                      | 7.49E-08    | 3.18E-06        | DUSP5       |
| 10                                  | 110497838                                         | 110511544   | + 2615          |             |
| protein_coding                      | dual specificity phosphatase 5 [Source:HGNC       |             |                 |             |
| Symbol;Acc:HGNC:3071]               | -                                                 | 877 1210    | 810 1745        | 2121        |
| 1783                                | 18.34098319                                       | 20.40082052 | 14.34880658     |             |
| 32.26450114                         | 35.34496639                                       | 31.82919726 |                 |             |
| ENSG00000131408                     | 2024.682933                                       | 2417.488575 | 2157.023306     |             |
| 3599.40377                          | 3403.214183                                       | 3922.899647 | 2199.731605     |             |

|                                     |                                                        |             |             |             |
|-------------------------------------|--------------------------------------------------------|-------------|-------------|-------------|
| 3641.8392                           | -0.726981703                                           | 7.91E-08    | 3.35E-06    | NR1H2       |
| 19                                  | 50329653                                               | 50382982    | + 3753      |             |
| protein_coding                      | nuclear receptor subfamily 1 group H member 2          |             |             |             |
| [Source:HGNC Symbol;Acc:HGNC:7965]  |                                                        | THR-like    | 1750        | 2608        |
| 2206                                | 3583                                                   | 3724        | 3998        | 25.50082301 |
|                                     |                                                        |             |             | 30.63818122 |
|                                     | 27.22885627                                            | 46.16038902 | 43.24040028 | 49.72906127 |
| ENSG00000158792                     | 376.0125446                                            | 701.7020136 | 531.9223384 |             |
| 1144.214595                         | 1346.115599                                            | 1114.66083  | 536.5456322 |             |
| 1201.663675                         | -1.161568746                                           | 7.94E-08    | 3.35E-06    |             |
| SPATA2L 16                          | 89696343                                               | 89701705    | - 2482      |             |
| protein_coding                      | spermatogenesis associated 2 like                      |             |             |             |
| [Source:HGNC Symbol;Acc:HGNC:28393] | -                                                      | 325 757     | 544 1139    | 1473        |
| 1136                                | 7.161043247                                            | 13.44708222 | 10.15312138 |             |
| 22.18825577                         | 25.86184875                                            | 21.36596881 |             |             |
| ENSG00000104738                     | 9320.48326                                             | 8920.97778  | 9745.716814 |             |
| 6017.42355                          | 5580.028411                                            | 6400.468833 | 9329.059284 |             |
| 5999.306932                         | 0.63696265                                             | 8.79E-08    | 3.70E-06    | MCM4        |
| 8                                   | 47960185                                               | 47978160    | + 6973      |             |
| protein_coding                      | minichromosome maintenance complex component 4         |             |             |             |
| [Source:HGNC Symbol;Acc:HGNC:6947]  | -                                                      |             | 8056 9624   | 9967        |
| 5990                                | 6106                                                   | 6523        | 63.18216525 | 60.8513065  |
| 66.21360731                         | 41.53444137                                            | 38.15888995 | 43.6690505  |             |
| ENSG00000177606                     | 3695.335592                                            | 3758.786876 | 3419.361061 |             |
| 5607.555635                         | 5599.219469                                            | 5619.42128  | 3624.49451  |             |
| 5608.732128                         | -0.629915133                                           | 9.00E-08    | 3.78E-06    | JUN         |
| 1                                   | 58780788                                               | 58784327    | - 3540      |             |
| protein_coding                      | "Jun proto-oncogene, AP-1 transcription factor subunit |             |             |             |
| [Source:HGNC Symbol;Acc:HGNC:6204]" |                                                        | TF_bZIP     | 3194 4055   | 3497        |
| 5582                                | 6127                                                   | 5727        | 49.34309225 | 50.50350905 |
| 45.76092832                         | 76.24086002                                            | 75.42289811 | 75.5213869  |             |
| ENSG00000160298                     | 393.3669697                                            | 456.0599613 | 645.3469547 |             |
| 207.947692                          | 172.7195168                                            | 209.9801212 | 498.2579619 |             |
| 196.8824433                         | 1.340787175                                            | 9.29E-08    | 3.89E-06    |             |
| C21orf58                            | 21                                                     | 46300181    | 46323875    | - 5315      |
| protein_coding                      | chromosome 21 open reading frame 58                    |             |             |             |
| [Source:HGNC Symbol;Acc:HGNC:1300]  |                                                        |             | 340 492     | 660         |
| 207                                 | 189                                                    | 214         | 3.498407222 | 4.08127437  |
| 5.752321123                         | 1.883077929                                            | 1.54959117  | 1.879561499 |             |
| ENSG00000179776                     | 214.03791                                              | 87.13340724 | 320.7178805 |             |
| 27.12361199                         | 22.84649694                                            | 53.96685357 | 207.2963992 |             |
| 34.64565417                         | 2.581812176                                            | 1.04E-07    | 4.34E-06    | CDH5        |
| 16                                  | 66366622                                               | 66404786    | + 6082      |             |
| protein_coding                      | cadherin 5                                             |             |             |             |
| [Source:HGNC Symbol;Acc:HGNC:1764]  |                                                        |             |             | -           |
| 185                                 | 94                                                     | 328         | 27 25       | 55          |
|                                     | 0.681420815                                            | 2.498215414 | 0.214643907 | 1.663489352 |
|                                     | 0.422145641                                            |             |             | 0.179123345 |
| ENSG00000169744                     | 337.8328093                                            | 231.7377852 | 441.9648841 |             |
| 128.5860124                         | 106.0077458                                            | 93.21547435 | 337.1784929 |             |
| 109.2697442                         | 1.625639732                                            | 1.07E-07    | 4.46E-06    | LDB2        |
| 4                                   | 16501541                                               | 16898809    | - 5586      |             |

|                                      |                                                        |             |             |             |       |        |
|--------------------------------------|--------------------------------------------------------|-------------|-------------|-------------|-------|--------|
| protein_coding                       | LIM domain binding 2 [Source:HGNC                      |             |             |             |       |        |
| Symbol;Acc:HGNC:6533]                | -                                                      | 292         | 250         | 452         | 128   | 116    |
| 95                                   | 2.858752996                                            | 1.973208762 |             | 3.748348474 |       |        |
| 1.107924726                          | 0.904931395                                            | 0.793905316 |             |             |       |        |
| ENSG0000005893                       | 4718.089714                                            | 4189.819157 |             | 5213.621155 |       |        |
| 2712.361199                          | 3001.115837                                            | 2927.94711  |             | 4707.176675 |       |        |
| 2880.474716                          | 0.70845329                                             | 1.15E-07    |             | 4.78E-06    |       | LAMP2  |
| X                                    | 120427827                                              | 120469365   |             | -           | 5526  |        |
| protein_coding                       | lysosomal associated membrane protein 2 [Source:HGNC   |             |             |             |       |        |
| Symbol;Acc:HGNC:6501]                | -                                                      | 4078        | 4520        | 5332        | 2700  | 3284   |
| 2984                                 | 40.35813174                                            | 36.06297179 |             | 44.69734386 |       |        |
| 23.62403623                          | 25.89708401                                            | 25.20774367 |             |             |       |        |
| ENSG00000146648                      | 3011.571242                                            | 1920.642764 |             | 3207.178805 |       |        |
| 1423.487341                          | 970.5191898                                            | 1438.461952 |             | 2713.130937 |       |        |
| 1277.489494                          | 1.086676468                                            | 1.15E-07    |             | 4.78E-06    |       | EGFR   |
| 7                                    | 55019021                                               | 55211628    |             | +           | 12521 |        |
| protein_coding                       | epidermal growth factor receptor [Source:HGNC          |             |             |             |       |        |
| Symbol;Acc:HGNC:3236]                | -                                                      | 2603        | 2072        | 3280        | 1417  | 1062   |
| 1466                                 | 11.36919892                                            | 7.295997785 |             | 12.13493024 |       |        |
| 5.471823134                          | 3.696103286                                            | 5.465639592 |             |             |       |        |
| ENSG00000087086                      | 42860.80224                                            | 57238.306   |             | 33562.93063 |       |        |
| 74266.4588                           | 102422.6735                                            | 80546.01956 |             | 44554.01296 |       |        |
| 85745.05061                          | -0.944492205                                           | 1.24E-07    |             | 5.13E-06    |       | FTL    |
| 19                                   | 48965301                                               | 48966878    |             | +           | 878   |        |
| protein_coding                       | ferritin light chain [Source:HGNC                      |             |             |             |       |        |
| Symbol;Acc:HGNC:3999]                | -                                                      | 37046       | 61749       | 34325       | 73928 | 112077 |
| 82088                                | 2307.498988                                            | 3100.768695 |             | 1811.000148 |       |        |
| 4071.136442                          | 5562.635196                                            | 4364.466803 |             |             |       |        |
| ENSG00000214357                      | 118.0100909                                            | 119.5766972 |             | 304.0953074 |       |        |
| 26.11903377                          | 31.07123583                                            | 43.17348286 |             | 180.5606985 |       |        |
| 33.45458415                          | 2.433026554                                            | 1.25E-07    |             | 5.15E-06    |       |        |
| NEURL1B 5                            | 172641266                                              | 172691540   |             | +           | 6424  |        |
| protein_coding                       | neuralized E3 ubiquitin protein ligase 1B [Source:HGNC |             |             |             |       |        |
| Symbol;Acc:HGNC:35422]               | -                                                      | 102         | 129         | 311         | 26    | 34     |
| 44                                   | 0.86833909                                             | 0.88535641  |             | 2.242628374 |       |        |
| 0.19569018                           | 0.230638594                                            | 0.319737209 |             |             |       |        |
| ENSG00000178295                      | 1145.392059                                            | 848.1602939 |             | 968.020432  |       |        |
| 535.4401923                          | 469.723977                                             | 515.1381477 |             | 987.1909283 |       |        |
| 506.767439                           | 0.961504835                                            | 1.28E-07    |             | 5.25E-06    |       | GEN1   |
| 2                                    | 17753858                                               | 17788941    |             | +           | 11827 |        |
| protein_coding                       | "GEN1, Holliday junction 5' flap endonuclease          |             |             |             |       |        |
| [Source:HGNC Symbol;Acc:HGNC:26881]" | -                                                      |             |             | 990         | 915   | 990    |
| 533                                  | 514                                                    | 525         | 4.577784144 | 3.410990071 |       |        |
| 3.877600419                          | 2.178982933                                            |             | 1.893856723 | 2.072195577 |       |        |
| ENSG00000029993                      | 1839.569064                                            |             | 2016.118731 | 2833.65981  |       |        |
| 773.525231                           | 1261.126631                                            |             | 1120.548123 | 2229.782535 |       |        |
| 1051.733328                          | 1.084030506                                            |             | 1.36E-07    | 5.56E-06    |       | HMGB3  |
| X                                    | 150980509                                              |             | 150990775   | +           | 3967  |        |
| protein_coding                       | high mobility group box 3 [Source:HGNC                 |             |             |             |       |        |
| Symbol;Acc:HGNC:5004]                | HMG                                                    | 1590        | 2175        | 2898        | 770   | 1380   |

|                                     |                                                 |             |                  |        |
|-------------------------------------|-------------------------------------------------|-------------|------------------|--------|
| 1142                                | 21.91944919                                     | 24.17302598 | 33.84064534      |        |
| 9.384901984                         | 15.15917211                                     | 13.4384735  |                  |        |
| ENSG00000136492                     | 1080.602205                                     | 894.5078509 | 1096.112025      |        |
| 494.2524852                         | 594.9227802                                     | 526.912734  | 1023.740694      |        |
| 538.6959998                         | 0.925603444                                     | 1.44E-07    | 5.88E-06         | BRIP1  |
| 17                                  | 61681266                                        | 61863521    | - 7991           |        |
| protein_coding                      | BRCA1 interacting protein C-terminal helicase 1 |             |                  |        |
| [Source:HGNC Symbol;Acc:HGNC:20473] | -                                               | 934         | 965              | 1121   |
| 492                                 | 651 537                                         | 6.39205434  | 5.324270855      |        |
| 6.498407444                         | 2.976906461                                     | 3.550082581 | 3.137033748      |        |
| ENSG00000100109                     | 1831.470333                                     | 1925.27752  | 1734.61439       |        |
| 3390.451499                         | 2789.100346                                     | 2915.191308 | 1830.454081      |        |
| 3031.581051                         | -0.72772634                                     | 1.46E-07    | 5.97E-06         | TFIP11 |
| 22                                  | 26491225                                        | 26512505    | - 5436           |        |
| protein_coding                      | tuftelin interacting protein 11 [Source:HGNC    |             |                  |        |
| Symbol;Acc:HGNC:17165]              | -                                               | 1583 2077   | 1774 3375        | 3052   |
| 2971                                | 15.92561379                                     | 16.84577541 | 15.11738325      |        |
| 30.01895333                         | 24.46603986                                     | 25.51345297 |                  |        |
| ENSG00000162390                     | 288.0834573                                     | 358.7300915 | 237.6050151      |        |
| 681.1040345                         | 631.4771753                                     | 617.1845617 | 294.806188       |        |
| 643.2552572                         | -1.124835581                                    | 1.52E-07    | 6.19E-06         | ACOT11 |
| 1                                   | 54542257                                        | 54639192    | + 9768           |        |
| protein_coding                      | acyl-CoA thioesterase 11 [Source:HGNC           |             |                  |        |
| Symbol;Acc:HGNC:18156]              | -                                               | 249 387     | 243 678          | 691    |
| 629                                 | 1.394082286                                     | 1.746784269 | 1.152399546      |        |
| 3.356025557                         | 3.082698096                                     | 3.006014218 |                  |        |
| ENSG00000167778                     | 477.8251721                                     | 660.9161634 | 549.5227099      |        |
| 1148.232908                         | 1131.358528                                     | 987.1028126 | 562.7546818      |        |
| 1088.898083                         | -0.951050686                                    | 1.54E-07    | 6.26E-06         | SPRYD3 |
| 12                                  | 53064316                                        | 53079420    | - 3479           |        |
| protein_coding                      | SPRY domain containing 3 [Source:HGNC           |             |                  |        |
| Symbol;Acc:HGNC:25920]              | -                                               | 413 713     | 562 1143         | 1238   |
| 1006                                | 6.492176759                                     | 9.035850963 | 7.483148137      |        |
| 15.88521211                         | 15.50689384                                     | 13.49862672 |                  |        |
| ENSG00000122565                     | 9613.194564                                     | 7860.545674 | 8064.881337      |        |
| 4616.03693                          | 5686.036157                                     | 5242.634521 | 8512.873858      |        |
| 5181.569203                         | 0.716080379                                     | 1.58E-07    | 6.38E-06         | CBX3   |
| 7                                   | 26201162                                        | 26213356    | + 4641           |        |
| protein_coding                      | chromobox 3 [Source:HGNC Symbol;Acc:HGNC:1553]  |             |                  | -      |
| 8309                                | 8480 8248                                       | 4595 6222   | 5343 97.91109403 |        |
| 80.55977449                         | 82.32647864                                     | 47.87129365 | 58.42208283      |        |
| 53.74271983                         |                                                 |             |                  |        |
| ENSG00000029534                     | 247.5897986                                     | 232.6647364 | 399.9195522      |        |
| 66.30216265                         | 46.60685375                                     | 116.7646468 | 293.3913624      |        |
| 76.55788774                         | 1.939927162                                     | 1.59E-07    | 6.41E-06         | ANK1   |
| 8                                   | 41653220                                        | 41896762    | - 10797          |        |
| protein_coding                      | ankyrin 1 [Source:HGNC Symbol;Acc:HGNC:492]     |             |                  | -      |
| 214                                 | 251 409                                         | 66 51       | 119 1.083940353  |        |
| 1.02495448                          | 1.754779946                                     | 0.295557545 | 0.205838056      |        |
| 0.514505351                         |                                                 |             |                  |        |

|                                      |                                                                                             |             |             |             |
|--------------------------------------|---------------------------------------------------------------------------------------------|-------------|-------------|-------------|
| ENSG0000079459                       | 4918.244083                                                                                 | 4989.777991 | 6598.183712 |             |
| 3362.323309                          | 3108.037443                                                                                 | 3265.485249 | 5502.068596 |             |
| 3245.282                             | 0.761747839                                                                                 | 1.63E-07    | 6.57E-06    | FDFT1       |
| 8                                    | 11795573                                                                                    | 11839309    | + 5202      |             |
| protein_coding                       | farnesyl-diphosphate farnesyltransferase 1                                                  |             |             |             |
| [Source:HGNC Symbol;Acc:HGNC:3629]   | -                                                                                           | 4251        | 5383        | 6748        |
| 3347                                 | 3401                                                                                        | 3328        | 44.69052637 | 45.62343601 |
| 60.09068875                          | 31.10903797                                                                                 | 28.49015958 | 29.86475839 |             |
| ENSG00000130522                      | 2414.579017                                                                                 | 3771.764192 | 3180.778248 |             |
| 4964.625573                          | 6229.782784                                                                                 | 6015.83235  | 3122.373819 |             |
| 5736.746902                          | -0.877239848                                                                                | 1.69E-07    | 6.78E-06    | JUND        |
| 19                                   | 18279760                                                                                    | 18281622    | - 1863      |             |
| protein_coding                       | "JunD proto-oncogene, AP-1 transcription factor subunit [Source:HGNC Symbol;Acc:HGNC:6206]" |             |             |             |
| subunit                              | TF_bZIP                                                                                     | 2087        | 4069        |             |
| 3253                                 | 4942                                                                                        | 6817        | 6131        | 61.263853   |
| 80.88605683                          | 128.2599607                                                                                 | 159.4553286 | 153.6259201 |             |
| ENSG00000141458                      | 4012.343091                                                                                 | 4521.667665 | 3231.623765 |             |
| 6657.339877                          | 6473.783372                                                                                 | 6593.768291 | 3921.878174 |             |
| 6574.963847                          | -0.745401212                                                                                | 1.79E-07    | 7.16E-06    | NPC1        |
| 18                                   | 23506184                                                                                    | 23586898    | - 10102     |             |
| protein_coding                       | NPC intracellular cholesterol transporter 1                                                 |             |             |             |
| [Source:HGNC Symbol;Acc:HGNC:7897]   | -                                                                                           | 3468        | 4878        | 3305        |
| 6627                                 | 7084                                                                                        | 6720        | 18.77441603 | 21.28964353 |
| 15.15537041                          | 31.71836722                                                                                 | 30.55834193 | 31.05331328 |             |
| ENSG00000164754                      | 10855.7714                                                                                  | 10065.76244 | 10950.36446 |             |
| 6821.086128                          | 7441.560982                                                                                 | 6509.383756 | 10623.9661  |             |
| 6924.010288                          | 0.617576117                                                                                 | 1.84E-07    | 7.34E-06    | RAD21       |
| 8                                    | 116845935                                                                                   | 116874866   | - 6192      |             |
| protein_coding                       | RAD21 cohesin complex component [Source:HGNC Symbol;Acc:HGNC:9811]                          |             |             |             |
| Symbol;Acc:HGNC:9811]                | -                                                                                           | 9383        | 10859       | 11199       |
| 6634                                 | 82.87155374                                                                                 | 77.32017769 | 83.78200567 | 6790        |
| 53.02003903                          | 57.30758205                                                                                 | 50.01388087 |             | 8143        |
| ENSG00000174276                      | 432.7036667                                                                                 | 606.2260461 | 442.9426825 |             |
| 1015.628582                          | 1032.661661                                                                                 | 902.7182779 | 493.9574651 |             |
| 983.6695073                          | -0.992611356                                                                                | 1.96E-07    | 7.82E-06    | ZNHIT2      |
| 11                                   | 65116403                                                                                    | 65117708    | - 1306      |             |
| protein_coding                       | zinc finger HIT-type containing 2 [Source:HGNC Symbol;Acc:HGNC:1177]                        |             |             |             |
| Symbol;Acc:HGNC:1177]                | -                                                                                           | 374         | 654         | 453         |
| 920                                  | 15.66113157                                                                                 | 22.07844738 | 16.06783935 | 1011        |
| 37.42908369                          | 37.70455889                                                                                 | 32.88445785 |             | 1130        |
| ENSG00000111110                      | 163.1315963                                                                                 | 228.0299806 | 309.9620979 |             |
| 21.09614266                          | 48.4345735                                                                                  | 78.49724156 | 233.7078916 |             |
| 49.34265257                          | 2.243827763                                                                                 | 2.05E-07    | 8.13E-06    | PPM1H       |
| 12                                   | 62643982                                                                                    | 62935037    | - 7063      |             |
| protein_coding                       | "protein phosphatase, Mg2+/Mn2+ dependent 1H [Source:HGNC Symbol;Acc:HGNC:18583]"           |             |             |             |
| [Source:HGNC Symbol;Acc:HGNC:18583]" | -                                                                                           | 141         | 246         | 317         |
| 21                                   | 53                                                                                          | 80          | 1.091753566 | 1.535606207 |
| 2.079086277                          | 0.143757763                                                                                 | 0.326998124 | 0.528745661 |             |
| ENSG00000174738                      | 1442.73121                                                                                  | 1114.195271 | 1378.695767 |             |
| 717.2688505                          | 741.1403606                                                                                 | 719.2309758 | 1311.874083 |             |

|                                    |                                                                                  |             |             |             |
|------------------------------------|----------------------------------------------------------------------------------|-------------|-------------|-------------|
| 725.8800623                        | 0.853281792                                                                      | 2.09E-07    | 8.29E-06    | NR1D2       |
| 3                                  | 23945260                                                                         | 23980618    | + 5820      |             |
| protein_coding                     | nuclear receptor subfamily 1 group D member 2                                    |             |             |             |
| [Source:HGNC Symbol;Acc:HGNC:7963] |                                                                                  | THR-like    | 1247        | 1202        |
| 1410                               | 714                                                                              | 811         | 733         | 11.71758686 |
|                                    | 11.22273179                                                                      | 5.931662651 | 6.07234541  | 9.105744098 |
| ENSG00000170558                    | 2148.477832                                                                      | 1712.078757 | 2232.313784 |             |
| 1250.699886                        | 1145.980286                                                                      | 1067.562485 | 2030.956791 |             |
| 1154.747553                        | 0.814393133                                                                      | 2.36E-07    | 9.32E-06    | CDH2        |
| 18                                 | 27950966                                                                         | 28177446    | - 4950      |             |
| protein_coding                     | cadherin 2 [Source:HGNC Symbol;Acc:HGNC:1759]                                    |             |             | -           |
| 1857                               | 1847                                                                             | 2283        | 1245        | 1254        |
|                                    | 16.45112698                                                                      | 21.36501334 | 12.16089025 | 1088        |
|                                    | 10.26052853                                                                      |             |             | 20.51641227 |
| ENSG00000075711                    | 2906.287729                                                                      | 2485.156009 | 2662.545087 |             |
| 1551.068775                        | 1768.318863                                                                      | 1589.569142 | 2684.662942 |             |
| 1636.318926                        | 0.713902275                                                                      | 2.37E-07    | 9.33E-06    | DLG1        |
| 3                                  | 197042560                                                                        | 197299300   | - 11001     |             |
| protein_coding                     | discs large MAGUK scaffold protein 1 [Source:HGNC Symbol;Acc:HGNC:2900]          |             |             |             |
|                                    | -                                                                                | 2512        | 2681        | 2723        |
|                                    | 1620                                                                             | 12.48769213 | 10.74480671 | 1544        |
|                                    |                                                                                  |             |             | 1935        |
| 6.786038946                        | 7.664916047                                                                      | 6.874306403 | 11.46615828 |             |
| ENSG00000166670                    | 26.61011854                                                                      | 50.05536161 | 47.91212239 |             |
| 152.6958897                        | 137.0789816                                                                      | 254.1348195 | 41.52586751 |             |
| 181.3032303                        | -2.119526718                                                                     | 2.43E-07    | 9.55E-06    | MMP10       |
| 11                                 | 102770503                                                                        | 102780628   | - 1758      |             |
| protein_coding                     | matrix metalloproteinase 10 [Source:HGNC Symbol;Acc:HGNC:7156]                   |             |             |             |
|                                    | -                                                                                | 23          | 54          | 49          |
|                                    | 259                                                                              | 0.715490181 | 1.354281192 | 152         |
|                                    |                                                                                  |             |             | 150         |
| 4.180477917                        | 3.718184928                                                                      | 6.877441884 | 1.291158816 |             |
| ENSG00000133119                    | 2857.695339                                                                      | 2454.566621 | 2401.47291  |             |
| 1590.247325                        | 1629.412161                                                                      | 1377.626589 | 2571.244957 |             |
| 1532.428692                        | 0.746299476                                                                      | 2.52E-07    | 9.87E-06    | RFC3        |
| 13                                 | 33818049                                                                         | 33966558    | + 2874      |             |
| protein_coding                     | replication factor C subunit 3 [Source:HGNC Symbol;Acc:HGNC:9971]                |             |             |             |
|                                    | -                                                                                | 2470        | 2648        | 2456        |
|                                    | 1404                                                                             | 47.00076235 | 40.62236228 | 1583        |
|                                    |                                                                                  |             |             | 1783        |
| 26.631484                          | 27.034801                                                                        | 22.80480588 | 39.58622187 |             |
| ENSG00000178913                    | 2324.336007                                                                      | 2274.7381   | 1981.019591 |             |
| 3464.790288                        | 3861.057982                                                                      | 3343.001275 | 2193.364566 |             |
| 3556.283182                        | -0.6974348                                                                       | 2.61E-07    | 1.02E-05    | TAF7        |
| 5                                  | 141260225                                                                        | 141320821   | - 2723      |             |
| protein_coding                     | TATA-box binding protein associated factor 7 [Source:HGNC Symbol;Acc:HGNC:11541] |             |             |             |
|                                    | -                                                                                |             | 2009        | 2454        |
|                                    | 3449                                                                             | 4225        | 3407        | 2026        |
|                                    |                                                                                  |             |             |             |
| 34.46626759                        | 61.24163398                                                                      | 40.34846415 | 39.73387078 |             |
| ENSG00000087245                    | 21981.11488                                                                      | 67.61416198 | 58.40775693 |             |
| 11298.49126                        | 11270.63387                                                                      | 15031.4397  | 23492.58475 |             |
| 11503.83307                        | 11270.63387                                                                      | 11942.37409 | 20168.37977 |             |
|                                    | 0.809943729                                                                      | 2.67E-07    | 1.04E-05    | MMP2        |
| 16                                 | 55389700                                                                         | 55506691    | + 4933      |             |

|                        |                                                    |             |       |             |             |        |
|------------------------|----------------------------------------------------|-------------|-------|-------------|-------------|--------|
| protein_coding         | matrix metalloproteinase 2 [Source:HGNC            |             |       |             |             |        |
| Symbol;Acc:HGNC:7166]  | -                                                  | 18999       | 16216 | 24026       | 11247       | 12333  |
| 12171                  | 210.6271445                                        | 144.9327652 |       | 225.6175158 |             |        |
| 110.2368503            | 108.9472353                                        | 115.1757855 |       |             |             |        |
| ENSG00000122483        | 650.2124618                                        | 525.5812969 |       | 616.9908006 |             |        |
| 287.3093715            | 281.4688422                                        | 309.0828886 |       | 597.5948531 |             |        |
| 292.6203675            | 1.029631749                                        | 2.84E-07    |       | 1.10E-05    |             | CCDC18 |
| 1                      | 93179919                                           | 93278730    |       | +           | 5633        |        |
| protein_coding         | coiled-coil domain containing 18 [Source:HGNC      |             |       |             |             |        |
| Symbol;Acc:HGNC:30370] | -                                                  | 562         | 567   | 631         | 286         | 308    |
| 315                    | 5.456212511                                        | 4.437897483 |       | 5.189100283 |             |        |
| 2.454864346            | 2.382701087                                        | 2.610458771 |       |             |             |        |
| ENSG00000242802        | 1423.062861                                        | 1992.944953 |       | 1592.83362  |             |        |
| 3089.078033            | 2722.388575                                        | 2913.228877 |       | 1669.613811 |             |        |
| 2908.231828            | -0.799981319                                       | 2.84E-07    |       | 1.10E-05    |             | AP5Z1  |
| 7                      | 4775615                                            | 4794395     | +     | 8396        |             |        |
| adaptor related        | protein complex 5 subunit zeta 1 [Source:HGNC      |             |       |             |             |        |
| Symbol;Acc:HGNC:22197] | -                                                  | 1230        | 2150  | 1629        | 3075        | 2979   |
| 2969                   | 8.011750097                                        | 11.29015718 |       | 8.987752617 |             |        |
| 17.70817914            | 15.46167966                                        | 16.50759493 |       |             |             |        |
| ENSG00000077152        | 1100.270554                                        | 996.4724764 |       | 937.7086811 |             |        |
| 475.165499             | 586.6980413                                        | 570.0862168 |       | 1011.483904 |             |        |
| 543.9832524            | 0.894147839                                        | 2.84E-07    |       | 1.10E-05    |             | UBE2T  |
| 1                      | 202331657                                          | 202341980   |       | -           | 1652        |        |
| protein_coding         | ubiquitin conjugating enzyme E2 T [Source:HGNC     |             |       |             |             |        |
| Symbol;Acc:HGNC:25009] | -                                                  | 951         | 1075  | 959         | 473         | 642    |
| 581                    | 31.4822082                                         | 28.69012096 |       | 26.89125184 |             |        |
| 13.8437043             | 16.9349369                                         | 16.41769281 |       |             |             |        |
| ENSG00000152402        | 540.3011026                                        | 365.2187495 |       | 603.3016228 |             |        |
| 246.1216644            | 84.9889686                                         | 118.7270779 |       | 502.9404916 |             |        |
| 149.9459036            | 1.747279943                                        | 2.87E-07    |       | 1.11E-05    |             |        |
| GUCY1A2 11             | 106674012                                          | 107018524   |       | -           | 16361       |        |
| protein_coding         | guanylate cyclase 1 soluble subunit alpha 2        |             |       |             |             |        |
| [Source:HGNC           | Symbol;Acc:HGNC:4684]                              | -           |       | 467         | 394         | 617    |
| 245                    | 93                                                 | 121         |       | 1.560995851 | 1.061745271 |        |
| 1.74693914             | 0.724031492                                        | 0.247703248 |       | 0.345240361 |             |        |
| ENSG00000182220        | 1626.688116                                        | 1604.552425 |       | 1621.189774 |             |        |
| 934.2577465            | 922.9984762                                        | 1047.938175 |       | 1617.476772 |             |        |
| 968.3981325            | 0.740120754                                        | 2.92E-07    |       | 1.12E-05    |             |        |
| ATP6AP2 X              | 40579372                                           | 40606848    |       | +           | 9560        |        |
| protein_coding         | ATPase H+ transporting accessory protein 2         |             |       |             |             |        |
| [Source:HGNC           | Symbol;Acc:HGNC:18305]                             | -           |       | 1406        | 1731        | 1658   |
| 930                    | 1010                                               | 1068        |       | 8.043075421 | 7.983128751 |        |
| 8.033949356            | 4.703555499                                        | 4.603859689 |       | 5.215061043 |             |        |
| ENSG00000101096        | 414.1922799                                        | 115.8688926 |       | 256.183185  |             |        |
| 48.21975466            | 61.22861179                                        | 69.66630188 |       | 262.0814525 |             |        |
| 59.70488944            | 2.131667392                                        | 3.06E-07    |       | 1.18E-05    |             | NFATC2 |
| 20                     | 51386957                                           | 51562831    |       | -           | 8286        |        |
| protein_coding         | nuclear factor of activated T cells 2 [Source:HGNC |             |       |             |             |        |
| Symbol;Acc:HGNC:7776]  | RHD                                                | 358         | 125   | 262         | 48          | 67     |



|                        |                                                        |             |             |                |
|------------------------|--------------------------------------------------------|-------------|-------------|----------------|
| 71                     | 2.362831818                                            | 0.665118522 | 1.464734187 |                |
| 0.280089949            | 0.352361517                                            | 0.399999507 |             |                |
| ENSG00000145833        | 3723.102672                                            | 3413.034101 | 3974.750562 |                |
| 2556.651575            | 2027.855068                                            | 2123.350384 | 3703.629112 |                |
| 2235.952342            | 0.728146946                                            | 3.10E-07    | 1.19E-05    | DDX46          |
| 5                      | 134758771                                              | 134855133   | + 9222      |                |
| protein_coding         | DEAD-box helicase 46 [Source:HGNC                      |             |             |                |
| Symbol;Acc:HGNC:18681] | -                                                      | 3218 3682   | 4065 2545   | 2219           |
| 2164                   | 19.08339478                                            | 17.60324057 | 20.41916074 |                |
| 13.3433195             | 10.48553954                                            | 10.95413716 |             |                |
| ENSG00000176531        | 107.5974358                                            | 157.5816939 | 145.691964  |                |
| 314.4329835            | 372.85483                                              | 357.1624491 | 136.9570313 |                |
| 348.1500875            | -1.343117653                                           | 3.16E-07    | 1.21E-05    | PHLDB3         |
| 19                     | 43474954                                               | 43504935    | - 4553      |                |
| protein_coding         | pleckstrin homology like domain family B member 3      |             |             |                |
| [Source:HGNC           | Symbol;Acc:HGNC:30499]                                 | -           | 93 170      | 149            |
| 313                    | 408 364                                                | 1.117069029 | 1.646209975 |                |
| 1.51597163             | 3.32389965                                             | 3.90500065  | 3.732069899 |                |
| ENSG00000161681        | 130.7366694                                            | 343.8988733 | 213.1600547 |                |
| 635.8980145            | 560.1961049                                            | 739.8365017 | 229.2651991 |                |
| 645.310207             | -1.489459404                                           | 3.17E-07    | 1.21E-05    | SHANK1         |
| 19                     | 50661827                                               | 50719450    | - 7567      |                |
| protein_coding         | SH3 and multiple ankyrin repeat domains 1 [Source:HGNC |             |             |                |
| Symbol;Acc:HGNC:15474] | -                                                      | 113 371     | 218 633     | 613            |
| 754                    | 0.816675303                                            | 2.16164381  | 1.334551124 |                |
| 4.044652293            | 3.530167711                                            | 4.651506667 |             |                |
| ENSG00000070081        | 937.1389573                                            | 767.5155446 | 814.5060807 |                |
| 437.9961048            | 477.034856                                             | 410.1480871 | 839.7201942 |                |
| 441.7263493            | 0.925882402                                            | 3.20E-07    | 1.22E-05    | NUCB2          |
| 11                     | 17208153                                               | 17349980    | + 9025      |                |
| protein_coding         | nucleobindin 2 [Source:HGNC                            |             |             |                |
| Symbol;Acc:HGNC:8044]  | -                                                      | 810 828     | 833 436     | 522 418        |
| 4.908316068            | 4.044986571                                            | 4.27563129  | 2.335826037 |                |
| 2.520472075            | 2.162096666                                            |             |             |                |
| ENSG00000178896        | 1151.176867                                            | 1258.799649 | 1055.044491 |                |
| 1763.03478             | 1986.731374                                            | 2224.415583 | 1155.007003 |                |
| 1991.393912            | -0.785787937                                           | 3.27E-07    | 1.24E-05    | EXOSC4         |
| 8                      | 144078626                                              | 144080647   | + 1407      |                |
| protein_coding         | exosome component 4 [Source:HGNC                       |             |             |                |
| Symbol;Acc:HGNC:18189] | -                                                      | 995 1358    | 1079 1755   | 2174           |
| 2267                   | 38.67440991                                            | 42.55392565 | 35.52464961 |                |
| 60.30929335            | 67.33239152                                            | 75.21482658 |             |                |
| ENSG00000099998        | 47.4354287                                             | 89.91426066 | 176.9815133 | 0              |
| 6.397019142            | 15.69944831                                            | 104.7770676 | 7.365489151 |                |
| 3.829633887            | 3.30E-07                                               | 1.25E-05    | GGT5 22     |                |
| 24219654               | 24245142                                               | -           | 6054        | protein_coding |
| protein_coding         | gamma-glutamyltransferase 5 [Source:HGNC               |             |             |                |
| Symbol;Acc:HGNC:4260]  | -                                                      | 41 97       | 181 0       | 7 16           |
| 0.3703703              | 0.70642047                                             | 1.384964412 | 0           | 0.050386503    |
| 0.123373988            |                                                        |             |             |                |

|                        |                                                      |             |             |       |                |
|------------------------|------------------------------------------------------|-------------|-------------|-------|----------------|
| ENSG00000204291        | 68.26073887                                          | 172.4129122 | 145.691964  |       |                |
| 24.10987733            | 27.41579632                                          | 15.69944831 | 128.7885384 |       |                |
| 22.40837399            | 2.523783453                                          | 3.32E-07    | 1.25E-05    |       |                |
| COL15A1 9              | 98943179                                             | 99070792    | +           | 6653  |                |
| protein_coding         | collagen type XV alpha 1 chain [Source:HGNC          |             |             |       |                |
| Symbol;Acc:HGNC:2192]  | -                                                    | 59          | 186         | 149   | 24             |
| 16                     | 0.484985999                                          | 1.232620479 | 1.037459617 |       | 30             |
| 0.174419459            | 0.196499898                                          | 0.112266064 |             |       |                |
| ENSG00000127022        | 12226.77099                                          | 10593.19764 | 14635.68669 |       |                |
| 7249.03645             | 7214.923732                                          | 8215.717545 | 12485.21844 |       |                |
| 7559.892576            | 0.723781882                                          | 3.40E-07    | 1.28E-05    |       | CANX           |
| 5                      | 179678628                                            | 179730925   | +           | 6235  |                |
| protein_coding         | calnexin [Source:HGNC Symbol;Acc:HGNC:1473]          |             |             |       | -              |
| 10568                  | 11428                                                | 14968       | 7216        | 7895  | 8373           |
| 80.81048846            | 111.2063976                                          | 55.95788394 | 55.17905701 |       |                |
| 62.68890287            |                                                      |             |             |       |                |
| ENSG00000099901        | 4913.616237                                          | 5353.142838 | 5847.234529 |       |                |
| 3243.783079            | 3191.198692                                          | 3692.314    | 5371.331201 |       |                |
| 3375.765257            | 0.670205361                                          | 3.42E-07    | 1.29E-05    |       | RANBP1         |
| 22                     | 20115938                                             | 20127357    | +           | 4622  |                |
| protein_coding         | RAN binding protein 1 [Source:HGNC                   |             |             |       |                |
| Symbol;Acc:HGNC:9847]  | -                                                    | 4247        | 5775        | 5980  | 3229           |
| 3763                   | 50.25126889                                          | 55.08787316 | 59.93406005 |       | 3492           |
| 33.77841914            | 32.92326454                                          | 38.00583801 |             |       |                |
| ENSG00000198899        | 36632.87754                                          | 40050.77794 | 47179.75138 |       |                |
| 64055.92575            | 62096.77867                                          | 67991.36699 | 41287.80229 |       |                |
| 64714.69047            | -0.648357509                                         | 3.46E-07    | 1.30E-05    |       | MT-            |
| ATP6 MT                | 8527                                                 | 9207        | +           | 681   | protein_coding |
| mitochondrially        | encoded ATP synthase membrane subunit 6 [Source:HGNC |             |             |       |                |
| Symbol;Acc:HGNC:7414]  | -                                                    | 31663       | 43207       | 48251 | 63764          |
| 69293                  | 2542.726573                                          | 2797.312326 | 3282.174465 |       | 67950          |
| 4527.199758            | 4348.114249                                          | 4749.941798 |             |       |                |
| ENSG00000171425        | 342.460656                                           | 526.508248  | 425.342311  |       |                |
| 953.3447327            | 741.1403606                                          | 1081.299502 | 431.4370717 |       |                |
| 925.2615319            | -1.098924272                                         | 3.48E-07    | 1.30E-05    |       | ZNF581         |
| 19                     | 55635459                                             | 55645622    | +           | 1736  |                |
| protein_coding         | zinc finger protein 581 [Source:HGNC                 |             |             |       |                |
| Symbol;Acc:HGNC:25017] | zf-C2H2                                              | 296         | 568         | 435   | 949            |
| 1102                   | 9.324739392                                          | 14.42555639 | 11.60758819 |       | 811            |
| 26.43125034            | 20.35774786                                          | 29.63315615 |             |       |                |
| ENSG00000108387        | 37.02277362                                          | 44.49365476 | 85.06846221 |       |                |
| 2.009156444            | 4.569299387                                          | 2.943646558 | 55.52829686 |       |                |
| 3.17403413             | 4.12071414                                           | 3.61E-07    | 1.35E-05    |       | 4-Sep          |
| 17                     | 58520250                                             | 58540818    | -           | 8012  |                |
| protein_coding         | septin 4 [Source:HGNC Symbol;Acc:HGNC:9165]          |             |             |       | -              |
| 32                     | 48                                                   | 87          | 2           | 5     | 3              |
| 0.264140049            | 0.503014805                                          | 0.012069528 | 0.027194912 |       |                |
| 0.017479393            |                                                      |             |             |       |                |
| ENSG00000115524        | 7952.954559                                          | 7261.735237 | 7593.5825   |       |                |
| 5028.918579            | 4972.311593                                          | 5199.461038 | 7602.757432 |       |                |

|                        |                                                   |                  |                  |             |
|------------------------|---------------------------------------------------|------------------|------------------|-------------|
| 5066.89707             | 0.585360972                                       | 3.70E-07         | 1.37E-05         | SF3B1       |
| 2                      | 197389784                                         | 197435091        | - 9164           |             |
| protein_coding         | splicing factor 3b subunit 1 [Source:HGNC         |                  |                  |             |
| Symbol;Acc:HGNC:10768] | -                                                 | 6874 7834        | 7766 5006        | 5441        |
| 5299                   | 41.02222006                                       | 37.69054737      | 39.2567879       |             |
| 26.41234621            | 25.87332496                                       | 26.99323122      |                  |             |
| ENSG00000073008        | 2033.938626                                       | 2283.08066       | 2326.182432      |             |
| 3609.449552            | 3261.565902                                       | 3710.957095      | 2214.400573      |             |
| 3527.324183            | -0.671320158                                      | 3.74E-07         | 1.39E-05         | PVR         |
| 19                     | 44643798                                          | 44663583         | + 3519           |             |
| protein_coding         | poliovirus receptor [Source:HGNC                  |                  |                  |             |
| Symbol;Acc:HGNC:9705]  | -                                                 | 1758 2463        | 2379 3593        | 3569 3782   |
| 27.3208569             | 30.85880492                                       | 31.31681819      | 49.36727629      |             |
| 44.19629654            | 50.17048432                                       |                  |                  |             |
| ENSG00000073282        | 56.69112211                                       | 85.27950496      | 190.6706912      |             |
| 15.06867333            | 14.62175804                                       | 16.68066383      | 110.8804394      |             |
| 15.45703173            | 2.844686001                                       | 3.79E-07         | 1.40E-05         | TP63        |
| 3                      | 189631416                                         | 189897279        | + 7454           |             |
| protein_coding         | tumor protein p63 [Source:HGNC                    |                  |                  |             |
| Symbol;Acc:HGNC:15979] | -                                                 | P53 49 92        | 195 15           | 16 17       |
| 0.359502077            | 0.544167245                                       | 1.211846684      | 0.097297815      |             |
| 0.09353824             | 0.106464684                                       |                  |                  |             |
| ENSG00000148848        | 1913.614612                                       | 1751.937656      | 1618.256379      |             |
| 1038.733882            | 901.0658391                                       | 1126.435416      | 1761.269549      |             |
| 1022.078379            | 0.785084393                                       | 4.28E-07         | 1.58E-05         | ADAM12      |
| 10                     | 126012381                                         | 126388455        | - 9860           |             |
| protein_coding         | ADAM metalloproteinase domain 12 [Source:HGNC     |                  |                  |             |
| Symbol;Acc:HGNC:190]   | -                                                 | 1148 9.173885239 | 8.451209101      | 7.7754143   |
| 5.070430571            | 4.357712735                                       | 5.435143425      |                  |             |
| ENSG00000170540        | 3607.406505                                       | 3059.865716      | 4222.133561      |             |
| 2070.435716            | 2344.050586                                       | 1973.22441       | 3629.801927      |             |
| 2129.236904            | 0.769400197                                       | 4.78E-07         | 1.76E-05         |             |
| ARL6IP1 16             | 18791667                                          | 18801678         | - 3666           |             |
| protein_coding         | ADP ribosylation factor like GTPase 6 interacting |                  |                  |             |
| protein 1 [Source:HGNC |                                                   |                  |                  |             |
| Symbol;Acc:HGNC:697]   | -                                                 | 4318 2061 2565   | 2011 46.51342962 | 39.69968142 |
| 54.56229548            | 27.1823342                                        | 30.48972495      | 25.60740946      |             |
| ENSG00000159111        | 1588.508381                                       | 1687.051076      | 1478.431205      |             |
| 2590.807235            | 2697.714358                                       | 2369.63548       | 1584.663554      |             |
| 2552.719024            | -0.68784334                                       | 4.82E-07         | 1.77E-05         | MRPL10      |
| 17                     | 47823272                                          | 47831534         | - 2764           |             |
| protein_coding         | mitochondrial ribosomal protein L10 [Source:HGNC  |                  |                  |             |
| Symbol;Acc:HGNC:14055] | -                                                 | 2415 27.16609476 | 29.03135506      | 25.34056001 |
| 45.11433083            | 46.54112878                                       | 40.78731643      |                  |             |
| ENSG00000060339        | 2125.338598                                       | 2108.813845      | 2379.961345      |             |
| 1392.345416            | 1379.014555                                       | 1348.190124      | 2204.704596      |             |
| 1373.183365            | 0.68313161                                        | 4.92E-07         | 1.80E-05         | CCAR1       |
| 10                     | 68721012                                          | 68792377         | + 6059           |             |

|                                     |                                                |         |             |                |       |             |      |
|-------------------------------------|------------------------------------------------|---------|-------------|----------------|-------|-------------|------|
| protein_coding                      | cell division cycle and apoptosis regulator 1  |         |             |                |       |             |      |
| [Source:HGNC Symbol;Acc:HGNC:24236] | -                                              |         | 1837        | 2275           |       | 2434        |      |
| 1386                                | 1509                                           | 1374    | 16.5807021  | 16.55443666    |       |             |      |
| 18.60895892                         | 11.06021309                                    |         | 10.85292708 | 10.58599821    |       |             |      |
| ENSG00000198853                     | 608.5618414                                    |         | 814.7900528 | 618.9463974    |       |             |      |
| 1388.327103                         | 1106.684312                                    |         | 1350.152555 | 680.7660972    |       |             |      |
| 1281.721323                         | -0.911822699                                   |         | 4.97E-07    | 1.82E-05       |       | RUSC2       |      |
| 9                                   | 35490127                                       |         | 35561898    | + 5682         |       |             |      |
| protein_coding                      | RUN and SH3 domain containing 2                |         |             |                |       |             |      |
| [Source:HGNC Symbol;Acc:HGNC:23625] | -                                              |         | 526         | 879            | 633   | 1382        | 1211 |
| 1376                                | 5.062665428                                    |         | 6.820584656 | 5.160656305    |       |             |      |
| 11.76001918                         | 9.287557414                                    |         | 11.30480929 |                |       |             |      |
| ENSG00000162591                     | 126.1088227                                    |         | 280.8661957 | 364.7188092    |       |             |      |
| 72.32963199                         | 24.67421669                                    |         | 67.70387084 | 257.2312759    |       |             |      |
| 54.90257317                         | 2.232071626                                    |         | 5.01E-07    | 1.83E-05       |       | MEGF6       |      |
| 1                                   | 3489920                                        | 3611495 | - 7039      | protein_coding |       |             |      |
| multiple                            | EGF like domains 6                             |         |             |                |       |             |      |
| [Source:HGNC Symbol;Acc:HGNC:3232]  | -                                              |         |             |                |       |             |      |
| 109                                 | 303                                            | 373     | 72          | 27             | 69    | 0.846857319 |      |
| 1.897866331                         | 2.454710738                                    |         | 0.494564282 | 0.16715193     |       |             |      |
| 0.457598046                         |                                                |         |             |                |       |             |      |
| ENSG00000115216                     | 2909.758614                                    |         | 2797.538543 | 2779.880897    |       |             |      |
| 4527.634047                         | 4215.635615                                    |         | 4183.902975 | 2829.059352    |       |             |      |
| 4309.057545                         | -0.607112655                                   |         | 5.07E-07    | 1.84E-05       |       | NRBP1       |      |
| 2                                   | 27427790                                       |         | 27442259    | + 5329         |       |             |      |
| protein_coding                      | nuclear receptor binding protein 1             |         |             |                |       |             |      |
| [Source:HGNC Symbol;Acc:HGNC:7993]  | -                                              |         | 2515        | 3018           | 2843  | 4507        | 4613 |
| 4264                                | 25.80993922                                    |         | 24.96936358 | 24.71346241    |       |             |      |
| 40.89244275                         | 37.72214083                                    |         | 37.35231398 |                |       |             |      |
| ENSG00000005022                     | 11659.85977                                    |         | 10042.58866 | 12743.64676    |       |             |      |
| 7788.494955                         | 7158.26442                                     |         | 6949.949524 | 11482.03173    |       |             |      |
| 7298.902967                         | 0.653610237                                    |         | 5.07E-07    | 1.84E-05       |       |             |      |
| SLC25A5 X                           | 119468400                                      |         | 119471319   | + 1500         |       |             |      |
| protein_coding                      | solute carrier family 25 member 5              |         |             |                |       |             |      |
| [Source:HGNC Symbol;Acc:HGNC:10991] | -                                              |         | 10078       | 10834          | 13033 | 7753        | 7833 |
| 7083                                | 367.432703                                     |         | 318.4428706 | 402.4904609    |       |             |      |
| 249.9077598                         | 227.559759                                     |         | 220.4306689 |                |       |             |      |
| ENSG00000076003                     | 3758.968484                                    |         | 3949.738811 | 3852.52576     |       |             |      |
| 1978.014519                         | 2693.145059                                    |         | 2324.499566 | 3853.744352    |       |             |      |
| 2331.886381                         | 0.724619506                                    |         | 5.18E-07    | 1.87E-05       |       | MCM6        |      |
| 2                                   | 135839626                                      |         | 135876426   | - 4118         |       |             |      |
| protein_coding                      | minichromosome maintenance complex component 6 |         |             |                |       |             |      |
| [Source:HGNC Symbol;Acc:HGNC:6949]  | -                                              |         |             |                | 3249  | 4261        | 3940 |
| 1969                                | 2947                                           | 2369    | 43.14774285 | 45.62040641    |       |             |      |
| 44.32128418                         | 23.11854993                                    |         | 31.18547701 | 26.85497511    |       |             |      |
| ENSG00000196611                     | 1124.566749                                    |         | 1126.245636 | 660.9917293    |       |             |      |
| 1822.304895                         | 1978.506635                                    |         | 1947.712806 | 970.6013714    |       |             |      |
| 1916.174779                         | -0.981666114                                   |         | 5.44E-07    | 1.97E-05       |       | MMP1        |      |
| 11                                  | 102789920                                      |         | 102798160   | - 1970         |       |             |      |
| protein_coding                      | matrix metalloproteinase 1                     |         |             |                |       |             |      |
| [Source:HGNC Symbol;Acc:HGNC:7155]  | -                                              |         | 972         | 1215           | 676   | 1814        | 2165 |

|                 |                                                                                                         |             |                  |             |
|-----------------|---------------------------------------------------------------------------------------------------------|-------------|------------------|-------------|
| 1985            | 26.98328072                                                                                             | 27.19217896 | 15.89581961      |             |
| 44.52175476     | 47.89059935                                                                                             | 47.03707646 |                  |             |
| ENSG00000163527 | 6097.188031                                                                                             | 4797.899105 | 5790.522221      |             |
| 3393.465234     | 3554.001063                                                                                             | 3551.018965 | 5561.869786      |             |
| 3499.495087     | 0.668240395                                                                                             | 5.46E-07    | 1.97E-05         | STT3B       |
| 3               | 31532638                                                                                                | 31637622    | + 5012           |             |
| protein_coding  | "STT3B, catalytic subunit of the oligosaccharyltransferase complex [Source:HGNC Symbol;Acc:HGNC:30611]" |             |                  | -           |
| 3619            | 57.5034982                                                                                              | 45.53204572 | 54.73432877      | 3889        |
| 32.5874066      | 33.81313812                                                                                             | 33.7072682  |                  |             |
| ENSG00000168385 | 8081.377305                                                                                             | 5888.920598 | 6872.945067      |             |
| 4218.223954     | 4516.295514                                                                                             | 3946.448819 | 6947.747657      |             |
| 4226.989429     | 0.716705032                                                                                             | 5.50E-07    | 1.98E-05         | 2-Sep       |
| 2               | 241315100                                                                                               | 241354027   | + 7378           |             |
| protein_coding  | septin 2 [Source:HGNC Symbol;Acc:HGNC:7729]                                                             |             |                  | -           |
| 6985            | 6353 7029                                                                                               | 4199 4942   | 4022 51.77528192 |             |
|                 | 37.96419211                                                                                             | 44.13237992 | 27.51746611      | 29.18923331 |
|                 | 25.44775361                                                                                             |             |                  |             |
| ENSG00000185085 | 935.9819957                                                                                             | 1153.127219 | 1229.092609      |             |
| 1822.304895     | 1887.120647                                                                                             | 1960.468608 | 1106.067275      |             |
| 1889.964717     | -0.772190571                                                                                            | 5.58E-07    | 2.00E-05         | INTS5       |
| 11              | 62646848                                                                                                | 62653302    | - 3285           |             |
| protein_coding  | integrator complex subunit 5 [Source:HGNC Symbol;Acc:HGNC:29352]                                        |             |                  | -           |
| 1998            | 13.46814739                                                                                             | 16.69625098 | 17.72565775      | 2065        |
| 26.69949981     | 27.39323226                                                                                             | 28.39266418 |                  |             |
| ENSG00000108582 | 2593.908077                                                                                             | 2264.541637 | 3309.847639      |             |
| 1628.421298     | 1557.217231                                                                                             | 1474.766926 | 2722.765784      |             |
| 1553.468485     | 0.809594326                                                                                             | 5.66E-07    | 2.03E-05         | CPD         |
| 17              | 30378905                                                                                                | 30469989    | + 12532          |             |
| protein_coding  | carboxypeptidase D [Source:HGNC Symbol;Acc:HGNC:2301]                                                   |             |                  | -           |
| -               | 2242 2443                                                                                               | 3385 1621   | 1704 1503        |             |
| 9.783853358     | 8.594825007                                                                                             | 12.51240354 | 6.254085945      |             |
| 5.925265322     | 5.598666911                                                                                             |             |                  |             |
| ENSG00000138346 | 719.6301623                                                                                             | 512.6039809 | 557.3450972      |             |
| 317.4467182     | 161.7531983                                                                                             | 241.3790178 | 596.5264135      |             |
| 240.1929781     | 1.312824715                                                                                             | 5.67E-07    | 2.03E-05         | DNA2        |
| 10              | 68414064                                                                                                | 68472121    | - 4867           |             |
| protein_coding  | DNA replication helicase/nuclease 2 [Source:HGNC Symbol;Acc:HGNC:2939]                                  |             |                  | -           |
| 246             | 6.989140181                                                                                             | 5.009538781 | 5.42520265       | 177         |
| 3.139257589     | 1.584785605                                                                                             | 2.359498995 |                  |             |
| ENSG00000149177 | 768.2225527                                                                                             | 701.7020136 | 869.262792       |             |
| 405.8496017     | 285.1242818                                                                                             | 433.6972596 | 779.7291194      |             |
| 374.890381      | 1.05716297                                                                                              | 5.70E-07    | 2.03E-05         | PTPRJ       |
| 11              | 47980558                                                                                                | 48170841    | + 9620           |             |
| protein_coding  | "protein tyrosine phosphatase, receptor type J [Source:HGNC Symbol;Acc:HGNC:9673]"                      |             |                  | -           |
| 404             | 312 442                                                                                                 | 3.774745883 | 664 757          | 889         |
|                 |                                                                                                         |             | 3.469403126      |             |

|                                      |                                                       |             |                |             |
|--------------------------------------|-------------------------------------------------------|-------------|----------------|-------------|
| 4.280841466                          | 2.030521113                                           | 1.413312239 | 2.144831766    |             |
| ENSG0000075223                       | 2062.862668                                           | 926.9511408 | 1315.13887     |             |
| 659.0033136                          | 600.4059395                                           | 640.7337342 | 1434.984226    |             |
| 633.3809958                          | 1.179159478                                           | 5.84E-07    | 2.08E-05       | SEMA3C      |
| 7                                    | 80742538                                              | 80922359    | - 6268         |             |
| protein_coding                       | semaphorin 3C [Source:HGNC Symbol;Acc:HGNC:10725]     |             |                |             |
| -                                    | 1783 1000                                             | 1345 656    | 657 653        |             |
| 15.55668536                          | 7.034042211                                           | 9.940214413 | 5.060297708    |             |
| 4.56767273                           | 4.863290692                                           |             |                |             |
| ENSG00000277443                      | 3526.419188                                           | 3861.678453 | 6002.704477    |             |
| 2242.218592                          | 2495.751325                                           | 2378.466419 | 4463.600706    |             |
| 2372.145445                          | 0.91211312                                            | 5.97E-07    | 2.12E-05       | MARCKS      |
| 6                                    | 113857362                                             | 113863471   | + 4275         |             |
| protein_coding                       | myristoylated alanine rich protein kinase C substrate |             |                |             |
| [Source:HGNC Symbol;Acc:HGNC:6759]   | -                                                     | 3048        | 4166           | 6139        |
| 2232                                 | 2731 2424                                             | 38.99182443 | 42.96522639    |             |
| 66.52179662                          | 25.24406488                                           | 27.83839411 | 26.46930463    |             |
| ENSG00000164465                      | 1037.794623                                           | 965.8830888 | 1101.001017    |             |
| 534.4356141                          | 652.4959525                                           | 498.4574839 | 1034.892909    |             |
| 561.7963502                          | 0.880828392                                           | 6.02E-07    | 2.13E-05       | DCBLD1      |
| 6                                    | 117453817                                             | 117569858   | + 6819         |             |
| protein_coding                       | "discoidin, CUB and LCCL domain containing 1          |             |                |             |
| [Source:HGNC Symbol;Acc:HGNC:21479]" | -                                                     | 897         | 1042           | 1126        |
| 532                                  | 714 508                                               | 7.193934269 | 6.737223991    |             |
| 7.649272909                          | 3.77217783                                            | 4.562849235 | 3.477675515    |             |
| ENSG00000121210                      | 340.1467327                                           | 213.1987624 | 408.719738     |             |
| 124.5676995                          | 106.0077458                                           | 104.9900606 | 320.688411     |             |
| 111.8551686                          | 1.519266883                                           | 6.12E-07    | 2.16E-05       |             |
| TMEM131L                             | 4 153466346                                           | 153636711   | + 6393         |             |
| protein_coding                       | transmembrane 131 like [Source:HGNC                   |             |                |             |
| Symbol;Acc:HGNC:29146]               | -                                                     | 294 230     | 418 124        | 116         |
| 107                                  | 2.514996232                                           | 1.586196874 | 3.028823967    |             |
| 0.937817208                          | 0.790700262                                           | 0.781313105 |                |             |
| ENSG00000125845                      | 27.76708022                                           | 43.56670362 | 21.51156516    |             |
| 147.6729986                          | 102.3523063                                           | 178.5812245 | 30.94844966    |             |
| 142.8688432                          | -2.202285531                                          | 6.65E-07    | 2.34E-05       | BMP2        |
| 20                                   | 6767664 6780280                                       | + 3601      | protein_coding | bone        |
| morphogenetic protein 2              | [Source:HGNC Symbol;Acc:HGNC:1069]                    |             |                |             |
| 24                                   | 47 22                                                 | 147 112     | 182            | 0.364487663 |
|                                      | 0.575451458                                           | 0.283010152 | 1.973764938    | 1.355356363 |
|                                      | 2.35936049                                            |             |                |             |
| ENSG00000149485                      | 8223.683591                                           | 7778.973974 | 10076.21268    |             |
| 5465.910106                          | 4770.34856                                            | 5791.133996 | 8692.956748    |             |
| 5342.464221                          | 0.702406513                                           | 6.66E-07    | 2.34E-05       | FADS1       |
| 11                                   | 61799625                                              | 61829318    | - 10230        |             |
| protein_coding                       | fatty acid desaturase 1 [Source:HGNC                  |             |                |             |
| Symbol;Acc:HGNC:3574]                | -                                                     | 7108 8392   | 10305 5441     | 5220        |
| 5902                                 | 37.99850394                                           | 36.16794216 | 46.66323227    |             |
| 25.71605279                          | 22.23583625                                           | 26.93206211 |                |             |
| ENSG00000100335                      | 1906.672842                                           | 1915.081057 | 1820.660651    |             |

|                                     |                                                    |             |             |        |
|-------------------------------------|----------------------------------------------------|-------------|-------------|--------|
| 2949.44166                          | 2871.347735                                        | 2858.280808 | 1880.80485  |        |
| 2893.023401                         | -0.621247704                                       | 7.22E-07    | 2.53E-05    | MIEF1  |
| 22                                  | 39499432                                           | 39518132    | + 7555      |        |
| protein_coding                      | mitochondrial elongation factor 1                  |             |             |        |
| [Source:HGNC Symbol;Acc:HGNC:25979] | -                                                  | 1648 2066   | 1862 2936   | 3142   |
| 2913                                | 11.92936842                                        | 12.05673753 | 11.41688598 |        |
| 18.78982776                         | 18.12300915                                        | 17.9991523  |             |        |
| ENSG00000085662                     | 4927.499777                                        | 6279.167028 | 6876.856261 |        |
| 3469.813179                         | 3851.005523                                        | 3634.422284 | 6027.841022 |        |
| 3651.746995                         | 0.723194329                                        | 7.25E-07    | 2.54E-05    | AKR1B1 |
| 7                                   | 134442350                                          | 134459284   | - 3660      |        |
| protein_coding                      | aldo-keto reductase family 1 member B              |             |             |        |
| [Source:HGNC Symbol;Acc:HGNC:381]   | -                                                  | 4259 6774   | 7033 3454   | 4214   |
| 3704                                | 63.63869532                                        | 81.6014855  | 89.01475233 |        |
| 45.62915901                         | 50.17322805                                        | 47.24283251 |             |        |
| ENSG00000178177                     | 588.8934929                                        | 561.7323914 | 611.1240101 |        |
| 246.1216644                         | 345.4390337                                        | 234.5105092 | 587.2499648 |        |
| 275.3570691                         | 1.09164879                                         | 7.29E-07    | 2.54E-05    | LCORL  |
| 4                                   | 17841199                                           | 18021876    | - 14858     |        |
| protein_coding                      | ligand dependent nuclear receptor corepressor like |             |             |        |
| [Source:HGNC Symbol;Acc:HGNC:30776] |                                                    | HTH         | 509 606     | 625    |
| 245                                 | 378 239                                            | 1.873493286 | 1.798234097 |        |
| 1.948597402                         | 0.797272798                                        | 1.108638723 | 0.750902556 |        |
| ENSG00000168243                     | 915.1566855                                        | 586.7600722 | 965.0870368 |        |
| 315.4375617                         | 417.633964                                         | 400.3359319 | 822.3345981 |        |
| 377.8024859                         | 1.121162097                                        | 7.46E-07    | 2.60E-05    | GNG4   |
| 1                                   | 235547687                                          | 235650754   | - 5401      |        |
| protein_coding                      | G protein subunit gamma 4                          |             |             |        |
| [Source:HGNC Symbol;Acc:HGNC:4407]  | -                                                  | 791 633     | 987 314     | 457    |
| 408                                 | 8.009345328                                        | 5.167297792 | 8.465359989 |        |
| 2.810973085                         | 3.687233327                                        | 3.526403644 |             |        |
| ENSG00000189320                     | 333.2049626                                        | 373.5613098 | 238.5828135 |        |
| 858.9143798                         | 559.282245                                         | 702.5503119 | 315.116362  |        |
| 706.9156456                         | -1.165346226                                       | 7.57E-07    | 2.63E-05    |        |
| FAM180A 7                           | 135728348                                          | 135748846   | - 2526      |        |
| protein_coding                      | family with sequence similarity 180 member A       |             |             |        |
| [Source:HGNC Symbol;Acc:HGNC:33773] | -                                                  |             | 288 403     | 244    |
| 855                                 | 612 716                                            | 6.235249759 | 7.03405335  |        |
| 4.474648607                         | 16.36567736                                        | 10.55787884 | 13.23200669 |        |
| ENSG00000164761                     | 583.1086846                                        | 832.4021245 | 815.4838791 |        |
| 289.3185279                         | 336.3004349                                        | 420.9414579 | 743.664896  |        |
| 348.8534736                         | 1.092804458                                        | 8.08E-07    | 2.80E-05    |        |
| TNFRSF11B                           | 8 118923557                                        | 118952200   | -           | 2827   |
| protein_coding                      | TNF receptor superfamily member 11b                |             |             |        |
| [Source:HGNC Symbol;Acc:HGNC:11909] | -                                                  |             | 504 898     | 834    |
| 288                                 | 368 429                                            | 9.749883821 | 14.00504428 |        |
| 13.66604033                         | 4.925699299                                        | 5.672579719 | 7.08398315  |        |
| ENSG00000128050                     | 8464.33162                                         | 8082.086997 | 8623.204232 |        |
| 5129.376402                         | 5887.08533                                         | 5732.261065 | 8389.874283 |        |
| 5582.907599                         | 0.587566378                                        | 8.39E-07    | 2.90E-05    | PAICS  |

|                        |                                                                      |                       |             |             |      |                |
|------------------------|----------------------------------------------------------------------|-----------------------|-------------|-------------|------|----------------|
| 4                      | 56435741                                                             | 56464579              | +           | 7517        |      |                |
| protein_coding         | phosphoribosylaminoimidazole carboxylase and                         |                       |             |             |      |                |
|                        | phosphoribosylaminoimidazolesuccinocarboxamide synthase [Source:HGNC |                       |             |             |      |                |
| Symbol;Acc:HGNC:8587]  | -                                                                    | 7316                  | 8719        | 8819        | 5106 | 6442           |
| 5842                   | 53.22600364                                                          | 51.13945382           |             | 54.34720929 |      |                |
| 32.8425959             | 37.34519814                                                          | 36.27964579           |             |             |      |                |
| ENSG00000115159        | 1719.24505                                                           | 1725.983024           |             | 2070.977045 |      |                |
| 1227.594587            | 981.4855083                                                          | 961.5912091           |             | 1838.73504  |      |                |
| 1056.890435            | 0.799208807                                                          | 8.63E-07              |             | 2.98E-05    |      | GPD2           |
| 2                      | 156435290                                                            | 156613735             | +           | 7155        |      |                |
| protein_coding         | glycerol-3-phosphate dehydrogenase 2 [Source:HGNC                    |                       |             |             |      |                |
| Symbol;Acc:HGNC:4456]  | -                                                                    | 1486                  | 1862        | 2118        | 1222 | 1074           |
| 980                    | 11.35805282                                                          | 11.47371337           |             | 13.71256734 |      |                |
| 8.257770034            | 6.541136936                                                          | 6.393850441           |             |             |      |                |
| ENSG00000031691        | 813.344058                                                           | 750.8304241           |             | 623.8353895 |      |                |
| 374.7076768            | 405.7537856                                                          | 349.3127249           |             | 729.3366239 |      |                |
| 376.5913958            | 0.952863267                                                          | 8.75E-07              |             | 3.01E-05    |      | CENPQ          |
| 6                      | 49463378                                                             | 49493107              | +           | 1733        |      |                |
| protein_coding         | centromere protein Q [Source:HGNC                                    |                       |             |             |      |                |
| Symbol;Acc:HGNC:21347] | -                                                                    | 703                   | 810         | 638         | 373  | 444            |
| 356                    | 22.18459349                                                          | 20.60726776           |             | 17.05393376 |      |                |
| 10.40666287            | 11.16459581                                                          | 9.589533289           |             |             |      |                |
| ENSG00000131043        | 1764.366555                                                          | 2100.471285           |             | 1595.767015 |      |                |
| 3284.970786            | 2800.980524                                                          | 2991.726119           |             | 1820.201619 |      |                |
| 3025.892476            | -0.73297454                                                          | 8.98E-07              |             | 3.09E-05    |      | AAR2           |
| 20                     | 36236459                                                             | 36270918              | +           | 3101        |      |                |
| protein_coding         | AAR2 splicing factor homolog [Source:HGNC                            |                       |             |             |      |                |
| Symbol;Acc:HGNC:15886] | -                                                                    | 1525                  | 2266        | 1632        | 3270 | 3065           |
| 3049                   | 26.89445761                                                          | 32.21751929           |             | 24.37927824 |      |                |
| 50.98556108            | 43.07123358                                                          | 45.89883833           |             |             |      |                |
| ENSG00000145217        | 195.5265232                                                          | 261.4002217           |             | 251.294193  |      |                |
| 630.8751234            | 446.8774801                                                          | 492.5701908           |             | 236.073646  |      |                |
| 523.4409314            | -1.14663378                                                          | 9.29E-07              |             | 3.18E-05    |      |                |
| SLC26A1                | 4                                                                    | 979073                | 993440      | -           | 4293 | protein_coding |
| carrier family         | 26                                                                   | member 1 [Source:HGNC |             |             |      | solute         |
| Symbol;Acc:HGNC:10993] | -                                                                    | 169                   | 282         | 257         | 628  | 489            |
| 169                    | 282                                                                  | 257                   | 628         | 489         | 502  | 2.152883498    |
| 2.896157511            | 2.773158489                                                          | 7.072939964           | 4.963711921 |             |      |                |
| 5.458695444            |                                                                      |                       |             |             |      |                |
| ENSG00000144567        | 1722.715935                                                          | 1751.010705           |             | 1643.679138 |      |                |
| 2699.301683            | 2640.141186                                                          | 2567.841014           |             | 1705.801926 |      |                |
| 2635.761294            | -0.627772375                                                         | 9.30E-07              |             | 3.18E-05    |      |                |
| RETREG2                | 2                                                                    | 219176225             | 219185479   | +           | 5689 |                |
| protein_coding         | reticulophagy regulator family member 2 [Source:HGNC                 |                       |             |             |      |                |
| Symbol;Acc:HGNC:28450] | -                                                                    | 1489                  | 1889        | 1681        | 2687 | 2889           |
| 2617                   | 14.31375162                                                          | 14.63962601           |             | 13.68781843 |      |                |
| 22.8366791             | 22.12942888                                                          | 21.47404331           |             |             |      |                |
| ENSG00000143799        | 7336.293986                                                          | 7994.95359            |             | 9792.651138 |      |                |
| 5230.838802            | 4480.654979                                                          | 5580.172659           |             | 8374.632904 |      |                |
| 5097.222147            | 0.716442599                                                          | 9.40E-07              |             | 3.21E-05    |      | PARP1          |
| 1                      | 226360691                                                            | 226408079             | -           | 7169        |      |                |



|                        |                                           |              |      |             |      |        |
|------------------------|-------------------------------------------|--------------|------|-------------|------|--------|
| protein_coding         | poly(ADP-ribose) polymerase 1             | [Source:HGNC |      |             |      |        |
| Symbol;Acc:HGNC:270]   | Others                                    | 6341         | 8625 | 10015       | 5207 | 4903   |
| 5687                   | 48.37198233                               | 53.04378198  |      | 64.71349106 |      |        |
| 35.11803552            | 29.80313229                               | 37.03144711  |      |             |      |        |
| ENSG00000076242        | 1292.326192                               | 1442.335975  |      | 1490.164786 |      |        |
| 624.8476541            | 830.6986286                               | 879.1691054  |      | 1408.275651 |      |        |
| 778.2384627            | 0.855642007                               | 9.48E-07     |      | 3.23E-05    |      | MLH1   |
| 3                      | 36993332                                  | 37050918     |      | +           | 3532 |        |
| protein_coding         | mutL homolog 1                            | [Source:HGNC |      |             |      |        |
| Symbol;Acc:HGNC:7127]  | -                                         | 1117         | 1556 | 1524        | 622  | 909    |
| 17.29526381            | 19.42329274                               | 19.98787975  |      | 8.514730493 |      |        |
| 11.21506477            | 11.84222615                               |              |      |             |      |        |
| ENSG00000145715        | 2534.903031                               | 2481.448204  |      | 2793.570075 |      |        |
| 1509.881068            | 1548.992492                               | 1793.66197   |      | 2603.307104 |      |        |
| 1617.511843            | 0.686626692                               | 9.60E-07     |      | 3.26E-05    |      | RASA1  |
| 5                      | 87267888                                  | 87391931     |      | +           | 5232 |        |
| protein_coding         | RAS p21 protein activator 1               | [Source:HGNC |      |             |      |        |
| Symbol;Acc:HGNC:9871]  | -                                         | 2191         | 2677 | 2857        | 1503 | 1695   |
| 1828                   | 22.90178615                               | 22.55872727  |      | 25.29559859 |      |        |
| 13.88968708            | 14.11759                                  | 16.31001994  |      |             |      |        |
| ENSG00000058804        | 3260.318002                               | 2713.185989  |      | 3436.961433 |      |        |
| 2045.32126             | 1753.697105                               | 1955.56253   |      | 3136.821808 |      |        |
| 1918.193632            | 0.709533846                               | 9.67E-07     |      | 3.28E-05    |      | NDC1   |
| 1                      | 53765460                                  | 53838860     |      | -           | 5135 |        |
| protein_coding         | NDC1 transmembrane nucleoporin            | [Source:HGNC |      |             |      |        |
| Symbol;Acc:HGNC:25525] | -                                         | 2818         | 2927 | 3515        | 2036 | 1919   |
| 1993                   | 30.01202182                               | 25.13137395  |      | 31.70934982 |      |        |
| 19.17072521            | 16.28520105                               | 18.11810977  |      |             |      |        |
| ENSG00000164904        | 1420.748938                               | 1585.086451  |      | 1856.839192 |      |        |
| 879.0059443            | 886.4440811                               | 1032.238726  |      | 1620.891527 |      |        |
| 932.5629173            | 0.797895111                               | 9.90E-07     |      | 3.35E-05    |      |        |
| ALDH7A1                | 5                                         | 126531200    |      | 126595418   |      | 17970  |
| protein_coding         | aldehyde dehydrogenase 7 family member A1 | [Source:HGNC |      |             |      |        |
| Symbol;Acc:HGNC:877]   | -                                         | 1228         | 1710 | 1899        | 875  | 970    |
| 1052                   | 3.737188488                               | 4.195483247  |      | 4.895300355 |      |        |
| 2.354296692            | 2.35224338                                | 2.732836808  |      |             |      |        |
| ENSG00000173846        | 537.9871792                               | 828.6943199  |      | 493.7882002 |      |        |
| 1122.113874            | 1530.715295                               | 1205.913873  |      | 620.1565664 |      |        |
| 1286.247681            | -1.051706155                              | 9.92E-07     |      | 3.35E-05    |      | PLK3   |
| 1                      | 44800225                                  | 44805990     |      | +           | 3479 |        |
| protein_coding         | polo like kinase 3                        | [Source:HGNC |      |             |      |        |
| Symbol;Acc:HGNC:2154]  | -                                         | 465          | 894  | 505         | 1117 | 1675   |
| 7.309593688            | 11.32966446                               | 6.724181155  |      | 15.5238687  |      |        |
| 20.980652              | 16.49086703                               |              |      |             |      |        |
| ENSG00000161381        | 281.1416872                               | 46.34755704  |      | 260.0943787 |      |        |
| 44.20144177            | 26.50193645                               | 20.60552591  |      | 195.8612076 |      |        |
| 30.43630137            | 2.6858776                                 | 9.99E-07     |      | 3.36E-05    |      | PLXDC1 |
| 17                     | 39063303                                  | 39154394     |      | -           | 9277 |        |
| protein_coding         | plexin domain containing 1                | [Source:HGNC |      |             |      |        |
| Symbol;Acc:HGNC:20945] | -                                         | 243          | 50   | 266         | 44   | 29     |

|                                     |                                                      |             |             |                         |
|-------------------------------------|------------------------------------------------------|-------------|-------------|-------------------------|
| 21                                  | 1.432496039                                          | 0.23762734  | 1.328239942 |                         |
| 0.229322325                         | 0.13622256                                           | 0.105671476 |             |                         |
| ENSG00000185215                     | 699.9618138                                          | 914.900776  | 1268.204546 |                         |
| 452.0601999                         | 474.2932764                                          | 449.3967079 | 961.0223785 |                         |
| 458.5833947                         | 1.067985868                                          | 1.03E-06    | 3.45E-05    |                         |
| TNFAIP2                             | 14                                                   | 103123442   | 103137439   | + 5029                  |
| protein_coding                      | TNF alpha induced protein 2 [Source:HGNC             |             |             |                         |
| Symbol;Acc:HGNC:11895]              | -                                                    | 605         | 987         | 1297 450 519            |
| 458                                 | 6.579129756                                          | 8.653055216 | 11.94705316 |                         |
| 4.326454041                         | 4.497221932                                          | 4.251379541 |             |                         |
| ENSG00000140937                     | 194.3695615                                          | 55.61706845 | 220.9824421 |                         |
| 12.05493866                         | 5.483159264                                          | 39.24862078 | 156.9896907 |                         |
| 18.92890624                         | 3.054445038                                          | 1.03E-06    | 3.46E-05    | CDH11                   |
| 16                                  | 64943753                                             | 65126112    | -           | 13381                   |
| protein_coding                      | cadherin 11 [Source:HGNC Symbol;Acc:HGNC:1750] -     |             |             |                         |
| 168                                 | 60                                                   | 226         | 12          | 6 40 0.686618378        |
| 0.197695433                         | 0.782388258                                          | 0.043360461 | 0.019539852 |                         |
| 0.139546021                         |                                                      |             |             |                         |
| ENSG00000254087                     | 388.739123                                           | 406.9315508 | 641.435761  |                         |
| 193.8835969                         | 197.3937335                                          | 215.8674143 | 479.0354783 |                         |
| 202.3815816                         | 1.243659651                                          | 1.07E-06    | 3.58E-05    | LYN                     |
| 8                                   | 55879813                                             | 56014168    | + 6185      |                         |
| protein_coding                      | "LYN proto-oncogene, Src family tyrosine kinase      |             |             |                         |
| [Source:HGNC Symbol;Acc:HGNC:6735]" | -                                                    |             | 336 439     | 656                     |
| 193                                 | 216                                                  | 220         | 2.970942771 | 3.129383398             |
| 4.913224301                         | 1.508755345                                          | 1.52185279  | 1.660462274 |                         |
| ENSG00000258807                     | 18.51138681                                          | 17.61207168 | 16.62257307 |                         |
| 86.39372709                         | 155.3561792                                          | 66.72265532 | 17.58201052 |                         |
| 102.8241872                         | -2.550166745                                         | 1.12E-06    | 3.72E-05    |                         |
| AL359237.1                          | 14                                                   | 87710419    | 87872291    | - 1845                  |
| lincRNA                             | novel transcript - 16 19 17                          |             |             |                         |
| 86                                  | 170                                                  | 68          | 0.474261996 | 0.45403694              |
| 0.426830069                         | 2.253737325                                          | 4.015236667 | 1.720515455 |                         |
| ENSG00000147853                     | 1263.40215                                           | 1172.593193 | 1229.092609 |                         |
| 643.9346403                         | 784.0917748                                          | 712.3624671 | 1221.695984 |                         |
| 713.4629608                         | 0.775471447                                          | 1.13E-06    | 3.75E-05    | AK3                     |
| 9                                   | 4709559                                              | 4742043     | -           | 4483                    |
| adenylate kinase 3                  | [Source:HGNC Symbol;Acc:HGNC:17376] - 1092           |             |             |                         |
| 1265                                | 1257                                                 | 641         | 858         | 726 13.32136145         |
| 12.44101302                         | 12.98879895                                          | 6.913381245 | 8.340213087 |                         |
| 7.559862868                         |                                                      |             |             |                         |
| ENSG00000065328                     | 1404.551474                                          | 1471.071461 | 1442.252664 |                         |
| 952.3401545                         | 773.1254563                                          | 845.8077778 | 1439.291866 |                         |
| 857.0911295                         | 0.748245602                                          | 1.15E-06    | 3.81E-05    | MCM10                   |
| 10                                  | 13161554                                             | 13211104    | + 5454      |                         |
| protein_coding                      | minichromosome maintenance 10 replication initiation |             |             |                         |
| factor                              | [Source:HGNC Symbol;Acc:HGNC:18043] - 1214 1587      |             |             |                         |
| 1475                                | 948                                                  | 846         | 862         | 12.17301805 12.82908702 |
| 12.5279307                          | 8.404162094                                          | 6.759488401 | 7.377991797 |                         |
| ENSG00000165672                     | 3139.993988                                          | 3095.089859 | 2886.460925 |                         |

|                 |                                               |                                       |                |             |
|-----------------|-----------------------------------------------|---------------------------------------|----------------|-------------|
| 1857.465133     | 2092.739119                                   | 1935.93822                            | 3040.514924    |             |
| 1962.047491     | 0.631776136                                   | 1.15E-06                              | 3.81E-05       | PRDX3       |
| 10              | 119167703                                     | 119178833                             | - 3417         |             |
| protein_coding  | peroxiredoxin 3                               | [Source:HGNC Symbol;Acc:HGNC:9354]    |                |             |
| -               | 2714 3339                                     | 2952 1849                             | 2290 1973      |             |
| 43.43697544     | 43.08294656                                   | 40.01970013                           | 26.16333782    |             |
| 29.20445468     | 26.95430525                                   |                                       |                |             |
| ENSG00000145040 | 273.0429555                                   | 155.7277917                           | 342.2294457    |             |
| 104.4761351     | 51.17615314                                   | 52.98563805                           | 257.0000643    |             |
| 69.54597543     | 1.886965719                                   | 1.16E-06                              | 3.84E-05       | UCN2        |
| 3               | 48561727                                      | 48563773                              | - 1481         |             |
| protein_coding  | urocortin 2                                   | [Source:HGNC Symbol;Acc:HGNC:18414] - |                |             |
| 236             | 168 350                                       | 104 56                                | 54 8.714684266 |             |
|                 | 5.001360746                                   | 10.9475123                            | 3.395310506    | 1.647750933 |
|                 | 1.702098689                                   |                                       |                |             |
| ENSG00000166401 | 1691.47797                                    | 1672.219858                           | 1181.180487    |             |
| 2730.443607     | 2629.174867                                   | 2496.212282                           | 1514.959438    |             |
| 2618.610252     | -0.789770686                                  | 1.25E-06                              | 4.11E-05       |             |
| SERPINB8        | 18 63969925                                   | 64019779                              | + 5868         |             |
| protein_coding  | serpin family B member 8                      | [Source:HGNC Symbol;Acc:HGNC:8952] -  |                |             |
|                 | 2544 13.62548532                              | 1462 1804                             | 1208 2718      | 2877        |
| 22.39548973     | 21.36526847                                   | 20.23825379                           | 9.536286385    |             |
| ENSG00000204389 | 1876.591838                                   | 1779.74619                            | 1211.492238    |             |
| 4207.173594     | 2239.87056                                    | 3573.586922                           | 1622.610089    |             |
| 3340.210358     | -1.041704109                                  | 1.28E-06                              | 4.22E-05       | HSPA1A      |
| 6               | 31815464                                      | 31817946                              | + 2483         |             |
| protein_coding  | heat shock protein family A (Hsp70) member 1A | [Source:HGNC Symbol;Acc:HGNC:5232] -  |                |             |
|                 | 4188 2451 3642                                | 35.72472078                           | 1622 1920      | 1239        |
| 23.11516738     | 81.55135285                                   | 43.0155212                            | 34.09247001    |             |
| ENSG00000196878 | 1096.799669                                   | 944.5632125                           | 68.47140788    |             |
| 574.618743      | 508.1060918                                   | 689.7945102                           | 1680.835477    |             |
| 590.8397817     | 1.070649782                                   | 689.7945102                           | 1240.732786    |             |
| 1               | 209614870                                     | 1.28E-06                              | 4.22E-05       | LAMB3       |
| protein_coding  | laminin subunit beta 3                        | [Source:HGNC Symbol;Acc:HGNC:6490] -  |                |             |
|                 | 703 11.05898953                               | 948 1019                              | 1719 572       | 556         |
| 5.89942443      | 5.16827705                                    | 9.583420378                           | 16.98598474    |             |
| ENSG00000267317 | 320.4783842                                   | 7.000253346                           |                |             |
| 632.8842799     | 620.5108568                                   | 335.556313                            | 357.8742203    |             |
| 632.6845776     | -0.904069832                                  | 644.6585963                           | 337.9696392    |             |
| AC027307.2      | 19 1457670                                    | 1458580 -                             | 4.39E-05       |             |
|                 | "novel transcript, antisense to APC2"         |                                       | 911 antisense  |             |
|                 | 366 630 679                                   | 657 16.62861602                       | - 277 362      |             |
|                 | 18.61080524                                   | 33.43669849                           | 17.5195986     |             |
| ENSG00000134352 | 3800.619105                                   | 32.47954937                           | 33.666117      |             |
| 2482.312787     | 2459.19693                                    | 3630.867619                           | 4559.474015    |             |
| 2526.993155     | 0.661547378                                   | 2639.469747                           | 3996.986913    |             |
| 5               | 55935095                                      | 1.36E-06                              | 4.44E-05       | IL6ST       |
|                 |                                               | 55994993                              | - 9292         |             |

|                                                                       |                                                 |              |              |             |             |       |      |
|-----------------------------------------------------------------------|-------------------------------------------------|--------------|--------------|-------------|-------------|-------|------|
| protein_coding                                                        | interleukin 6 signal transducer                 | [Source:HGNC |              |             |             |       |      |
| Symbol;Acc:HGNC:6021]                                                 | -                                               | 3285         | 3917         | 4663        | 2471        | 2691  |      |
| 2690                                                                  | 19.33396311                                     | 18.58567457  |              | 23.24655864 |             |       |      |
| 12.85774359                                                           | 12.62010866                                     | 13.51416181  |              |             |             |       |      |
| ENSG00000173706                                                       | 1874.277915                                     | 1713.005708  |              | 3195.445224 |             |       |      |
| 977.45461                                                             | 969.6053299                                     | 1308.941503  |              | 2260.909616 |             |       |      |
| 1085.333814                                                           | 1.058938831                                     | 1.37E-06     |              | 4.47E-05    |             | HEG1  |      |
| 3                                                                     | 124965710                                       | 125055958    |              | -           | 9925        |       |      |
| protein_coding                                                        | heart development protein with EGF like domains | 1            |              |             |             |       |      |
| [Source:HGNC Symbol;Acc:HGNC:29227]                                   | -                                               | 1620         | 1848         | 3268        |             |       |      |
| 973                                                                   | 1061                                            | 1334         | 8.926458944  | 8.20928644  |             |       |      |
| 15.25295497                                                           | 4.740056751                                     | 4.65847175   |              | 6.274387691 |             |       |      |
| ENSG00000001036                                                       | 1336.290735                                     | 1543.37365   |              | 2206.891025 |             |       |      |
| 758.4565576                                                           | 605.8890987                                     | 1047.938175  |              | 1695.51847  |             |       |      |
| 804.0946104                                                           | 1.076806794                                     | 1.42E-06     |              | 4.63E-05    |             | FUCA2 |      |
| 6                                                                     | 143494811                                       | 143511690    |              | -           | 2793        |       |      |
| protein_coding                                                        | alpha-L-fucosidase 2                            | [Source:HGNC |              |             |             |       |      |
| Symbol;Acc:HGNC:4008]                                                 | -                                               | 1155         | 1665         | 2257        | 755         | 663   |      |
| 1068                                                                  | 22.61547747                                     | 26.28314071  |              | 37.4337279  |             |       |      |
| 13.0700495                                                            | 10.34430198                                     | 17.85033425  |              |             |             |       |      |
| ENSG00000140534                                                       | 775.1643227                                     | 575.6366585  |              | 1053.088894 |             |       |      |
| 429.959479                                                            | 263.1916447                                     | 345.3878629  |              | 801.2966251 |             |       |      |
| 346.1796622                                                           | 1.211356236                                     | 1.42E-06     |              | 4.63E-05    |             | TICRR |      |
| 15                                                                    | 89575482                                        | 89631056     |              | +           | 8402        |       |      |
| protein_coding                                                        | TOPBP1 interacting checkpoint and replication   |              |              |             |             |       |      |
| regulator [Source:HGNC Symbol;Acc:HGNC:28704]                         | -                                               | 670          | 621          |             |             |       |      |
| 1077                                                                  | 428                                             | 288          | 352          | 4.361007547 | 3.258688747 |       |      |
| 5.937935583                                                           | 2.46298807                                      | 1.493717291  |              | 1.955717051 |             |       |      |
| ENSG00000134910                                                       | 4462.401183                                     | 3772.691143  |              | 5145.175266 |             |       |      |
| 2848.983838                                                           | 2367.810942                                     | 2851.4123    |              | 4460.089197 |             |       |      |
| 2689.40236                                                            | 0.729836593                                     | 1.43E-06     |              | 4.64E-05    |             | STT3A |      |
| 11                                                                    | 125591712                                       | 125625215    |              | +           | 7393        |       |      |
| protein_coding                                                        | "STT3A, catalytic subunit of the                |              |              |             |             |       |      |
| oligosaccharyltransferase complex [Source:HGNC Symbol;Acc:HGNC:6172]" | -                                               | 3857         | 4070         | 5262        | 2836        | 2591  | 2906 |
| 28.53143698                                                           | 24.27211723                                     | 32.97103599  |              | 18.54755796 |             |       |      |
| 15.27233017                                                           | 18.34936077                                     |              |              |             |             |       |      |
| ENSG00000177565                                                       | 4233.322771                                     | 3217.44741   |              | 4016.795894 |             |       |      |
| 2488.340256                                                           | 2405.279197                                     | 2020.322755  |              | 3822.522025 |             |       |      |
| 2304.647403                                                           | 0.729756169                                     | 1.44E-06     |              | 4.65E-05    |             |       |      |
| TBL1XR1 3                                                             | 177019340                                       | 177228000    |              | -           | 11603       |       |      |
| protein_coding                                                        | transducin beta like 1 X-linked receptor        | 1            |              |             |             |       |      |
| [Source:HGNC Symbol;Acc:HGNC:29529]                                   | -                                               | 3659         | 3471         | 4108        |             |       |      |
| 2477                                                                  | 2632                                            | 2059         | 17.24593838  | 13.1891947  |             |       |      |
| 16.40070808                                                           | 10.32183544                                     | 9.88494348   |              | 8.283847404 |             |       |      |
| ENSG00000169220                                                       | 223.2936034                                     | 268.8158308  |              | 228.8048294 |             |       |      |
| 442.0144177                                                           | 489.8288943                                     | 578.9171565  |              | 240.3047545 |             |       |      |
| 503.5868228                                                           | -1.066379332                                    | 1.44E-06     |              | 4.65E-05    |             | RGS14 |      |
| 5                                                                     | 177357837                                       | 177372601    |              | +           | 3797        |       |      |
| protein_coding                                                        | regulator of G protein signaling                | 14           | [Source:HGNC |             |             |       |      |

|                                     |                                           |             |             |              |       |        |
|-------------------------------------|-------------------------------------------|-------------|-------------|--------------|-------|--------|
| Symbol;Acc:HGNC:9996]               | -                                         | 193         | 290         | 234          | 440   | 536    |
| 590                                 | 2.779786392                               | 3.367374034 |             | 2.854813331  |       |        |
| 5.602905477                         | 6.151524957                               | 7.253664263 |             |              |       |        |
| ENSG00000122591                     | 2441.189136                               | 2261.760784 |             | 2473.829993  |       |        |
| 1436.546857                         | 1542.595473                               | 1605.26859  |             | 2392.259971  |       |        |
| 1528.136973                         | 0.646450872                               | 1.48E-06    |             | 4.76E-05     |       |        |
| FAM126A 7                           | 22889371                                  | 23014130    |             | -            | 14499 |        |
| protein_coding                      | family with sequence similarity           |             |             | 126 member A |       |        |
| [Source:HGNC Symbol;Acc:HGNC:24587] | -                                         |             |             | 2110         | 2440  | 2530   |
| 1430                                | 1688                                      | 1636        | 7.958644725 | 7.419689555  |       |        |
| 8.083229828                         | 4.768691242                               | 5.073328573 |             | 5.267339186  |       |        |
| ENSG00000106799                     | 2265.330961                               | 2665.911481 |             | 2577.476625  |       |        |
| 1611.343468                         | 1638.55076                                | 1301.091779 |             | 2502.906356  |       |        |
| 1516.995336                         | 0.722552463                               | 1.49E-06    |             | 4.81E-05     |       | TGFBR1 |
| 9                                   | 99104038                                  | 99154192    |             | +            | 6844  |        |
| protein_coding                      | transforming growth factor beta           |             |             | receptor 1   |       |        |
| [Source:HGNC Symbol;Acc:HGNC:11772] | -                                         |             |             | 1958         | 2876  | 2636   |
| 1604                                | 1793                                      | 1326        | 15.64578649 | 18.52733008  |       |        |
| 17.84176689                         | 11.33171334                               | 11.41639236 |             | 9.044395787  |       |        |
| ENSG00000168487                     | 1117.624979                               | 821.2787108 |             | 1714.080624  |       |        |
| 624.8476541                         | 350.9221929                               | 556.3491995 |             | 1217.661438  |       |        |
| 510.7063489                         | 1.25403166                                | 1.52E-06    |             | 4.89E-05     |       | BMP1   |
| 8                                   | 22164736                                  | 22212326    |             | +            | 7471  |        |
| protein_coding                      | bone morphogenetic protein 1              |             |             | [Source:HGNC |       |        |
| Symbol;Acc:HGNC:1067]               | -                                         | 966         | 886         | 1753         | 622   | 384    |
| 567                                 | 7.071199705                               | 5.228642437 |             | 10.86940161  |       |        |
| 4.02543543                          | 2.239809517                               | 3.542830365 |             |              |       |        |
| ENSG00000221955                     | 573.8529912                               | 499.6266649 |             | 393.0749633  |       |        |
| 940.2852158                         | 1122.219929                               | 816.3713122 |             | 488.8515398  |       |        |
| 959.6254858                         | -0.974254017                              | 1.54E-06    |             | 4.93E-05     |       |        |
| SLC12A8 3                           | 125082636                                 | 125212864   |             | -            | 5586  |        |
| protein_coding                      | solute carrier family 12 member 8         |             |             | [Source:HGNC |       |        |
| Symbol;Acc:HGNC:15595]              | -                                         | 496         | 539         | 402          | 936   | 1228   |
| 832                                 | 4.855963994                               | 4.254238091 |             | 3.333708156  |       |        |
| 8.101699558                         | 9.579790976                               | 6.952939185 |             |              |       |        |
| ENSG00000075420                     | 2818.358642                               | 2609.367461 |             | 2951.973418  |       |        |
| 1752.988997                         | 1868.843449                               | 1802.492909 |             | 2793.233174  |       |        |
| 1808.108452                         | 0.627320553                               | 1.55E-06    |             | 4.93E-05     |       | FNDC3B |
| 3                                   | 172039628                                 | 172401665   |             | +            | 13270 |        |
| protein_coding                      | fibronectin type III domain containing 3B |             |             | [Source:HGNC |       |        |
| Symbol;Acc:HGNC:24670]              | -                                         | 2436        | 2815        | 3019         | 1745  | 2045   |
| 1837                                | 10.03924548                               | 9.352795408 |             | 10.53888453  |       |        |
| 6.358076147                         | 6.715540726                               | 6.462257649 |             |              |       |        |
| ENSG00000108798                     | 108.7543975                               | 168.7051076 |             | 275.7391534  |       |        |
| 16.07325155                         | 60.31475191                               | 32.38011214 |             | 184.3995528  |       |        |
| 36.25603853                         | 2.343456922                               | 1.55E-06    |             | 4.93E-05     |       | ABI3   |
| 17                                  | 49210227                                  | 49223225    |             | +            | 2456  |        |
| protein_coding                      | ABI family member 3                       |             |             | [Source:HGNC |       |        |
| Symbol;Acc:HGNC:29859]              | -                                         | 94          | 182         | 282          | 16    | 66     |
| 33                                  | 2.093120368                               | 3.267209502 |             | 5.318916857  |       |        |

|                          |                                                 |             |                         |             |             |                |
|--------------------------|-------------------------------------------------|-------------|-------------------------|-------------|-------------|----------------|
| 0.31498715               | 1.171046582                                     | 0.62723692  |                         |             |             |                |
| ENSG00000115306          | 3137.680065                                     | 2915.261338 | 3838.836582             |             |             |                |
| 2088.518124              | 1746.386226                                     | 2115.50066  | 3297.259328             |             |             |                |
| 1983.468336              | 0.733399343                                     | 1.56E-06    | 4.95E-05                |             | SPTBN1      |                |
| 2                        | 54456285                                        | 54671445    | +                       | 18504       |             |                |
| protein_coding           | "spectrin beta, non-erythrocytic 1 [Source:HGNC |             |                         |             |             |                |
| Symbol;Acc:HGNC:11275]"  | -                                               | 2712        | 3145                    | 3926        | 2079        | 1911           |
| 2156                     | 8.015281474                                     | 7.493573786 | 9.828497495             |             |             |                |
| 5.432379305              | 4.500426414                                     | 5.439126664 |                         |             |             |                |
| ENSG00000226950          | 811.0301347                                     | 805.5205414 | 957.2646494             |             |             |                |
| 400.8267106              | 519.0724104                                     | 464.1149407 | 857.9384418             |             |             |                |
| 461.3380206              | 0.894729994                                     | 1.56E-06    | 4.95E-05                |             | DANCR       |                |
| 4                        | 52712404                                        | 52720351    | +                       | 2285        |             |                |
| processed_transcript     | differentiation antagonizing non-protein        |             |                         |             |             |                |
| coding RNA [Source:HGNC  | Symbol;Acc:HGNC:28964]"                         | -           | 701                     | 869         |             |                |
| 979                      | 399                                             | 568         | 473                     | 16.77747214 | 16.76746969 |                |
| 19.84718616              | 8.442827339                                     | 10.83230124 | 9.663200087             |             |             |                |
| ENSG00000284946          | 93.71389573                                     | 54.69011731 | 123.2026004             |             |             |                |
| 14.06409511              | 15.53561792                                     | 14.71823279 | 90.53553783             |             |             |                |
| 14.77264861              | 2.614172564                                     | 1.57E-06    | 4.97E-05                |             |             |                |
| AC068831.7               | 15                                              | 90966190    | 91022566                | -           | 7148        |                |
| protein_coding           | novel transcript                                |             | -                       | 81          | 59          |                |
| 126                      | 14                                              | 17          | 15                      | 0.619719537 | 0.363916231 |                |
| 0.816560668              | 0.094698851                                     | 0.103638943 | 0.097960897             |             |             |                |
| ENSG00000226674          | 155.0328645                                     | 127.9192574 | 202.4042721             |             |             |                |
| 60.27469332              | 31.07123583                                     | 26.49281903 | 161.7854647             |             |             |                |
| 39.27958273              | 2.044475532                                     | 1.60E-06    | 5.08E-05                |             | TEX41       |                |
| 2                        | 144667967                                       | 145262988   | +                       | 15056       |             |                |
| lincRNA                  | testis expressed 41 [Source:HGNC                |             | Symbol;Acc:HGNC:48667]" | -           |             |                |
| 134                      | 138                                             | 207         | 60                      | 34          | 27          | 0.486732006    |
| 0.404113574              | 0.636888189                                     | 0.192682761 | 0.098407434             |             |             |                |
| 0.083714405              |                                                 |             |                         |             |             |                |
| ENSG00000173334          | 441.9593601                                     | 456.0599613 | 362.7632124             |             |             |                |
| 755.442823               | 731.0879019                                     | 883.0939675 | 420.2608446             |             |             |                |
| 789.8748975              | -0.910449328                                    | 1.62E-06    | 5.11E-05                |             | TRIB1       |                |
| 8                        | 125430321                                       | 125438405   | +                       | 4138        |             |                |
| protein_coding           | tribbles pseudokinase 1 [Source:HGNC            |             |                         |             |             |                |
| Symbol;Acc:HGNC:16891]"  | -                                               | 382         | 492                     | 371         | 752         | 800            |
| 900                      | 5.048560782                                     | 5.242139506 | 4.153229012             |             |             |                |
| 8.786756084              | 8.424770876                                     | 10.15308586 |                         |             |             |                |
| ENSG00000006327          | 2704.976398                                     | 5157.556148 | 3771.368491             |             |             |                |
| 6599.07434               | 7244.167248                                     | 8034.192673 | 3877.967012             |             |             |                |
| 7292.478087              | -0.910776026                                    | 1.63E-06    | 5.15E-05                |             |             |                |
| TNFRSF12A                | 16                                              | 3018445     | 3022383                 | +           | 1848        | protein_coding |
| TNF receptor superfamily | member 12A [Source:HGNC                         |             |                         |             |             |                |
| Symbol;Acc:HGNC:18152]"  | -                                               | 2338        | 5564                    | 3857        | 6569        | 7927           |
| 8188                     | 69.1890317                                      | 132.7452875 | 96.68300223             |             |             |                |
| 171.8693805              | 186.9241821                                     | 206.8339867 |                         |             |             |                |
| ENSG00000104313          | 321.6353458                                     | 324.4328993 | 466.4098445             |             |             |                |
| 167.7645631              | 115.1463446                                     | 162.8817762 | 370.8260299             |             |             |                |

|                                    |                                                                             |                         |                         |        |
|------------------------------------|-----------------------------------------------------------------------------|-------------------------|-------------------------|--------|
| 148.5975613                        | 1.320797831                                                                 | 1.64E-06                | 5.17E-05                | EYA1   |
| 8                                  | 71197433                                                                    | 71592025                | - 9418                  |        |
| protein_coding                     | EYA transcriptional coactivator and phosphatase 1                           |                         |                         |        |
| [Source:HGNC Symbol;Acc:HGNC:3519] | -                                                                           | 278                     | 350 477                 |        |
| 167                                | 126 166                                                                     | 1.614287272             | 1.638488193             |        |
| 2.346184432                        | 0.857351677                                                                 | 0.583002553             | 0.822802188             |        |
| ENSG00000128567                    | 1684.5362                                                                   | 1790.869604             | 2624.410949             |        |
| 1092.981106                        | 1178.879242                                                                 | 1066.58127              | 2033.272251             |        |
| 1112.813872                        | 0.869757847                                                                 | 1.65E-06                | 5.19E-05                | PODXL  |
| 7                                  | 131500262                                                                   | 131558217               | - 6874                  |        |
| protein_coding                     | podocalyxin like [Source:HGNC Symbol;Acc:HGNC:9171]                         |                         |                         |        |
| -                                  | 1456 1932                                                                   | 2684 1088               | 1290 1087               |        |
| 11.58368022                        | 12.39171888                                                                 | 18.0873707              | 7.652803886             |        |
| 8.177843219                        | 7.381864211                                                                 |                         |                         |        |
| ENSG00000130724                    | 1833.784256                                                                 | 2166.284816             | 1810.882667             |        |
| 2881.130341                        | 3115.348322                                                                 | 3168.344912             | 1936.983913             |        |
| 3054.941192                        | -0.657081197                                                                | 1.67E-06                | 5.22E-05                | CHMP2A |
| 19                                 | 58551566                                                                    | 58555124                | - 2129                  |        |
| protein_coding                     | charged multivesicular body protein 2A [Source:HGNC Symbol;Acc:HGNC:30216]  |                         |                         |        |
| -                                  | -                                                                           | 1585 2337               | 1852 2868 3409          |        |
| 3229                               | 40.71442614                                                                 | 48.39684033             | 40.29654176             |        |
| 65.13354291                        | 69.77662149                                                                 | 70.80084148             |                         |        |
| ENSG00000162490                    | 255.6885303                                                                 | 53.76316617             | 234.6716199             |        |
| 48.21975466                        | 13.70789816                                                                 | 22.56795695             | 181.3744388             |        |
| 28.16520326                        | 2.689256132                                                                 | 1.70E-06                | 5.33E-05                | DRAXIN |
| 1                                  | 11691729                                                                    | 11725857                | + 7346                  |        |
| protein_coding                     | dorsal inhibitory axon guidance protein [Source:HGNC Symbol;Acc:HGNC:25054] |                         |                         |        |
| -                                  | -                                                                           | 221 58                  | 240 48 15               |        |
| 23                                 | 1.645265771                                                                 | 0.348105614             | 1.513431516             |        |
| 0.315930482                        | 0.088981338                                                                 | 0.14615812              |                         |        |
| ENSG00000175305                    | 485.9239038                                                                 | 486.6493489             | 494.7659986             |        |
| 190.8698622                        | 272.3302435                                                                 | 236.4729402             | 489.1130838             |        |
| 233.2243486                        | 1.067606637                                                                 | 1.72E-06                | 5.36E-05                | CCNE2  |
| 8                                  | 94879770                                                                    | 94896678                | - 4397                  |        |
| protein_coding                     | cyclin E2 [Source:HGNC Symbol;Acc:HGNC:1590]                                |                         |                         |        |
| -                                  | -                                                                           | 190 298                 | 241 5.223811986         |        |
| 420                                | 525 506                                                                     | 5.264253515 5.330850547 | 2.089288202 2.953373653 |        |
| 2.558624846                        |                                                                             |                         |                         |        |
| ENSG00000176393                    | 1170.845216                                                                 | 1459.021096             | 1779.593117             |        |
| 721.2871634                        | 783.1779149                                                                 | 888.0000451             | 1469.81981              |        |
| 797.4883745                        | 0.882563396                                                                 | 1.73E-06                | 5.40E-05                | RNPEP  |
| 1                                  | 201982372                                                                   | 202006147               | + 3479                  |        |
| protein_coding                     | arginyl aminopeptidase [Source:HGNC Symbol;Acc:HGNC:10078]                  |                         |                         |        |
| -                                  | -                                                                           | 1012 1574               | 1820 718 857            |        |
| 905                                | 15.90819099                                                                 | 19.94730633             | 24.23368258             |        |
| 9.978637177                        | 10.73457837                                                                 | 12.1433968              |                         |        |
| ENSG00000152818                    | 888.5465669                                                                 | 817.5709062             | 1203.66985              |        |
| 378.7259897                        | 337.2142948                                                                 | 603.4475445             | 969.9291078             |        |
| 439.795943                         | 1.141458698                                                                 | 1.74E-06                | 5.40E-05                | UTRN   |
| 6                                  | 144285701                                                                   | 144853034               | + 14604                 |        |

|                                                 |                                                      |             |             |             |             |                |
|-------------------------------------------------|------------------------------------------------------|-------------|-------------|-------------|-------------|----------------|
| protein_coding                                  | utrophin [Source:HGNC Symbol;Acc:HGNC:12635]         | -           |             |             |             |                |
|                                                 | 768                                                  | 882         | 1231        | 377         | 369         | 615            |
|                                                 | 2.662751996                                          |             | 3.904709099 |             | 1.248161385 | 1.101065461    |
|                                                 | 1.965845249                                          |             |             |             |             |                |
| ENSG00000137804                                 | 166.6024813                                          |             | 209.4909578 |             | 363.7410108 |                |
| 36.16481599                                     | 69.45335068                                          |             | 90.27182779 |             | 246.6114833 |                |
| 65.29666482                                     | 1.917152968                                          |             | 1.77E-06    |             | 5.49E-05    | NUSAP1         |
|                                                 | 15                                                   | 41332694    | 41381050    |             | +           | 2875           |
| protein_coding                                  | nucleolar and spindle associated protein 1           |             |             |             |             |                |
|                                                 | [Source:HGNC Symbol;Acc:HGNC:18538]                  | -           |             |             | 144         | 226            |
|                                                 | 36                                                   | 76          | 92          | 2.739172329 | 3.465808385 | 372            |
| 5.993873137                                     | 0.605432692                                          |             | 1.151951888 |             | 1.493812242 |                |
| ENSG00000108055                                 | 3827.229223                                          |             | 3539.099456 |             | 3581.675598 |                |
| 2542.58748                                      | 2235.30126                                           |             | 2409.865316 |             | 3649.334759 |                |
| 2395.918019                                     | 0.607040186                                          |             | 1.81E-06    |             | 5.61E-05    | SMC3           |
|                                                 | 10                                                   | 110567691   | 110604636   |             | +           | 4275           |
| protein_coding                                  | structural maintenance of chromosomes 3 [Source:HGNC |             |             |             |             |                |
|                                                 | Symbol;Acc:HGNC:2468]                                | -           | 3308        | 3818        | 3663        | 2531           |
|                                                 | 2456                                                 | 42.31789869 | 39.37619644 |             | 39.69202492 | 2446           |
| 28.62577429                                     | 24.93325228                                          |             | 26.8187344  |             |             |                |
| ENSG00000041357                                 | 3689.550784                                          |             | 3210.031801 |             | 3308.86984  |                |
| 2223.131605                                     | 2303.840751                                          |             | 2119.425522 |             | 3402.817475 |                |
| 2215.465959                                     | 0.61886243                                           |             | 1.82E-06    |             | 5.62E-05    | PSMA4          |
|                                                 | 15                                                   | 78540405    | 78552419    |             | +           | 6996           |
| protein_coding                                  | proteasome subunit alpha 4 [Source:HGNC              |             |             |             |             |                |
|                                                 | Symbol;Acc:HGNC:9533]                                | -           | 3189        | 3463        | 3384        | 2213           |
|                                                 | 2160                                                 | 24.92868852 | 21.82411536 |             | 22.40696364 | 2521           |
| 15.29441357                                     | 15.70296427                                          |             | 14.41285396 |             |             |                |
| ENSG00000065534                                 | 3576.16854                                           |             | 3507.583117 |             | 5065.973594 |                |
| 2265.323891                                     | 2245.353719                                          |             | 2578.634385 |             | 4049.908417 |                |
| 2363.103998                                     | 0.777319205                                          |             | 1.85E-06    |             | 5.70E-05    | MYLK           |
|                                                 | 3                                                    | 123610049   | 123884331   |             | -           | 22167          |
| protein_coding                                  | myosin light chain kinase [Source:HGNC               |             |             |             |             |                |
|                                                 | Symbol;Acc:HGNC:7590]                                | -           | 3091        | 3784        | 5181        | 2255           |
|                                                 | 2628                                                 | 7.625824329 | 7.526241755 |             | 10.82702468 | 2457           |
| 4.91859248                                      | 4.830107904                                          |             | 5.534322658 |             |             |                |
| ENSG00000132646                                 | 4669.497323                                          |             | 4205.577326 |             | 4498.850513 |                |
| 2982.592741                                     | 3026.703914                                          |             | 2961.308438 |             | 4457.975054 |                |
| 2990.201698                                     | 0.576015006                                          |             | 1.85E-06    |             | 5.70E-05    | PCNA           |
|                                                 | 20                                                   | 5114953     | 5126626     | -           | 1471        | protein_coding |
| proliferating cell nuclear antigen [Source:HGNC |                                                      |             |             |             |             |                |
|                                                 | Symbol;Acc:HGNC:8729]                                | -           | 4036        | 4537        | 4601        | 2969           |
|                                                 | 150.0490318                                          | 135.9847053 | 144.8912023 |             | 3312        | 3018           |
| 98.11519089                                     | 95.77509657                                          |             |             |             | 97.58852218 |                |
| ENSG00000172167                                 | 636.3289216                                          |             | 464.4025216 |             | 632.6355753 |                |
| 273.2452764                                     | 302.4876194                                          |             | 275.721561  |             | 577.7890062 |                |
| 283.8181523                                     | 1.024590175                                          |             | 1.86E-06    |             | 5.70E-05    | MTBP           |
|                                                 | 8                                                    | 120445400   | 120542133   |             | +           | 8326           |
| protein_coding                                  | MDM2 binding protein [Source:HGNC                    |             |             |             |             |                |
|                                                 | Symbol;Acc:HGNC:7417]                                | -           | 550         | 501         | 647         | 272            |
|                                                 |                                                      |             |             |             |             | 331            |



|                                    |                                                       |             |             |             |
|------------------------------------|-------------------------------------------------------|-------------|-------------|-------------|
| 281                                | 3.612609301                                           | 2.652987949 | 3.599733336 |             |
| 1.579551222                        | 1.732408018                                           | 1.575491082 |             |             |
| ENSG0000008300                     | 333.2049626                                           | 341.1180198 | 463.4764493 |             |
| 777.5435438                        | 715.552284                                            | 715.3061137 | 379.2664772 |             |
| 736.1339805                        | -0.955982675                                          | 1.88E-06    | 5.74E-05    | CELSR3      |
| 3                                  | 48636469                                              | 48662915    | -           | 13873       |
| protein_coding                     | cadherin EGF LAG seven-pass G-type receptor 3         |             |             |             |
| [Source:HGNC Symbol;Acc:HGNC:3230] |                                                       | -           | 288         | 368         |
| 774                                | 783                                                   | 729         | 1.135316146 | 1.169530064 |
| 1.582743036                        | 2.69756421                                            | 2.45951782  | 2.453031798 |             |
| ENSG0000033100                     | 1269.186958                                           | 1675.927663 | 1769.815133 |             |
| 2885.148654                        | 2627.347148                                           | 2467.757031 | 1571.643251 |             |
| 2660.084278                        | -0.758542768                                          | 1.88E-06    | 5.74E-05    | CHPF2       |
| 7                                  | 151232489                                             | 151238827   | +           | 4205        |
| protein_coding                     | chondroitin polymerizing factor 2 [Source:HGNC        |             |             |             |
| Symbol;Acc:HGNC:29270]             | -                                                     | 1097        | 1808        | 1810        |
| 2515                               | 14.26708801                                           | 18.95685918 | 19.9395352  | 2875        |
| 33.0232378                         | 29.79411204                                           | 27.92016787 |             |             |
| ENSG00000112992                    | 1389.510973                                           | 1314.416718 | 1316.116668 |             |
| 802.6579994                        | 869.9946033                                           | 783.0099845 | 1340.014786 |             |
| 818.5541957                        | 0.710757853                                           | 1.91E-06    | 5.83E-05    | NNT         |
| 5                                  | 43602692                                              | 43707405    | +           | 8245        |
| protein_coding                     | nicotinamide nucleotide transhydrogenase [Source:HGNC |             |             |             |
| Symbol;Acc:HGNC:7863]              | -                                                     | 1201        | 1418        | 1346        |
| 798                                | 7.96612396                                            | 7.582624134 | 7.562351432 | 952         |
| 4.685515035                        | 5.031585839                                           | 4.518125261 |             |             |
| ENSG0000007376                     | 1166.217369                                           | 1487.756581 | 1516.565343 |             |
| 2305.50702                         | 2210.627043                                           | 2333.330505 | 1390.179765 |             |
| 2283.154856                        | -0.715045038                                          | 1.92E-06    | 5.84E-05    | RPUSD1      |
| 16                                 | 784974                                                | 788397      | -           | 2769        |
| pseudouridylate                    | synthase domain containing 1 [Source:HGNC             |             |             |             |
| Symbol;Acc:HGNC:14173]             | -                                                     | 1008        | 1605        | 1551        |
| 2378                               | 19.90821348                                           | 25.55559748 | 25.94724771 | 2295        |
| 40.07383915                        | 38.06900364                                           | 40.08989607 |             | 2419        |
| ENSG00000105968                    | 4398.768291                                           | 3346.293618 | 4434.315817 |             |
| 2551.628684                        | 2563.376956                                           | 2430.470842 | 4059.792576 |             |
| 2515.158827                        | 0.690557037                                           | 1.95E-06    | 5.91E-05    | H2AFV       |
| 7                                  | 44826791                                              | 44848083    | -           | 4749        |
| protein_coding                     | H2A histone family member V [Source:HGNC              |             |             |             |
| Symbol;Acc:HGNC:20664]             | -                                                     | 3802        | 3610        | 4535        |
| 2477                               | 43.78291327                                           | 33.51498199 | 44.23617603 | 2540        |
| 25.86025265                        | 25.73885918                                           | 24.34836889 |             | 2805        |
| ENSG00000187951                    | 183.9569064                                           | 178.9015702 | 244.449604  |             |
| 56.25638043                        | 52.09001301                                           | 84.38453467 | 202.4360269 |             |
| 64.24364271                        | 1.656943392                                           | 1.95E-06    | 5.91E-05    |             |
| AC091057.1                         | 15                                                    | 30658717    | 30772993    | +           |
| processed_transcript               | OTU deubiquitinase 7A pseudogene                      |             |             |             |
| [Source:NCBI gene;Acc:100288637]   |                                                       | -           | 159         | 193         |
| 56                                 | 57                                                    | 86          | 1.542566169 | 1.509535157 |
| 2.054444577                        | 0.480331655                                           | 0.440641522 | 0.712190953 | 250         |

|                                               |                                                  |             |                   |        |
|-----------------------------------------------|--------------------------------------------------|-------------|-------------------|--------|
| ENSG00000197063                               | 1565.369147                                      | 1642.557422 | 1754.170359       |        |
| 2584.779765                                   | 2511.286943                                      | 2538.404549 | 1654.032309       |        |
| 2544.823752                                   | -0.621343402                                     | 1.97E-06    | 5.95E-05          | MAFG   |
| 17                                            | 81918270                                         | 81927714    | - 5220            |        |
| protein_coding                                | MAF bZIP transcription factor G [Source:HGNC     |             |                   |        |
| Symbol;Acc:HGNC:6781]                         | TF_bZIP                                          | 1353 1772   | 1794 2573         | 2748   |
| 2587                                          | 14.17496536                                      | 14.96673856 | 15.92041526       |        |
| 23.83254928                                   | 22.94060268                                      | 23.13513092 |                   |        |
| ENSG00000109685                               | 4668.340362                                      | 4718.181307 | 6063.327979       |        |
| 3447.712458                                   | 2833.87948                                       | 3215.443257 | 5149.949882       |        |
| 3165.678398                                   | 0.702205857                                      | 2.00E-06    | 6.03E-05          | NSD2   |
| 4                                             | 1871424 1982207 +                                | 19776       | protein_coding    |        |
| nuclear receptor binding SET domain protein 2 | [Source:HGNC                                     |             |                   |        |
| Symbol;Acc:HGNC:12766]                        | HMG                                              | 4035 5090   | 6201 3432         | 3101   |
| 3277                                          | 11.15834534                                      | 11.34784217 | 14.52532083       |        |
| 8.390928922                                   | 6.833165045                                      | 7.735422223 |                   |        |
| ENSG00000182718                               | 21647.90991                                      | 18583.51647 | 19340.85267       |        |
| 10901.68287                                   | 13876.96224                                      | 13636.93329 | 19857.42635       |        |
| 12805.1928                                    | 0.632886523                                      | 2.22E-06    | 6.70E-05          | ANXA2  |
| 15                                            | 60347134                                         | 60402883    | - 8824            |        |
| protein_coding                                | annexin A2 [Source:HGNC Symbol;Acc:HGNC:537]     |             |                   | -      |
| 18711                                         | 20048 19780                                      | 10852 15185 | 13898 115.9648077 |        |
| 100.170424                                    | 103.8396567                                      | 59.46282008 | 74.9907841        |        |
| 73.52462933                                   |                                                  |             |                   |        |
| ENSG00000076716                               | 401.4657015                                      | 400.4428928 | 497.6993938       |        |
| 205.9385355                                   | 186.427415                                       | 220.7734919 | 433.2026627       |        |
| 204.3798141                                   | 1.08443573                                       | 2.23E-06    | 6.70E-05          | GPC4   |
| X                                             | 133300103                                        | 133415490   | - 4960            |        |
| protein_coding                                | glypican 4 [Source:HGNC Symbol;Acc:HGNC:4452]    |             |                   | -      |
| 347                                           | 432 509                                          | 205 204     | 225 3.825978375   |        |
| 3.840042476                                   | 4.753774335                                      | 1.998358495 | 1.792285077       |        |
| 2.11761438                                    |                                                  |             |                   |        |
| ENSG00000232112                               | 577.3238762                                      | 622.9111666 | 847.7512268       |        |
| 300.3688884                                   | 344.5251738                                      | 366.9746043 | 682.6620899       |        |
| 337.2895555                                   | 1.017513126                                      | 2.26E-06    | 6.78E-05          | TMA7   |
| 3                                             | 48440257                                         | 48444208    | + 1139            |        |
| protein_coding                                | translation machinery associated 7 homolog       |             |                   |        |
| [Source:HGNC Symbol;Acc:HGNC:26932]           |                                                  | -           | 499 672           | 867    |
| 299                                           | 377 374                                          | 23.95915705 | 26.01234509       |        |
| 35.26126018                                   | 12.69254409                                      | 14.42368482 | 15.32829726       |        |
| ENSG00000132002                               | 4638.259358                                      | 4568.015222 | 4087.19738        |        |
| 7627.76244                                    | 6067.115726                                      | 6860.658912 | 4431.15732        |        |
| 6851.845693                                   | -0.62880953                                      | 2.26E-06    | 6.79E-05          | DNAJB1 |
| 19                                            | 14514770                                         | 14529770    | - 3672            |        |
| protein_coding                                | DnaJ heat shock protein family (Hsp40) member B1 |             |                   |        |
| [Source:HGNC Symbol;Acc:HGNC:5270]            |                                                  | -           | 4009 4928         | 4180   |
| 7593                                          | 6639 6992                                        | 59.70739127 | 59.17005659       |        |
| 52.73222118                                   | 99.97972637                                      | 78.78773107 | 88.88833737       |        |
| ENSG00000094916                               | 6893.177664                                      | 5290.110161 | 7051.882177       |        |
| 4276.489491                                   | 3876.5936                                        | 3914.068707 | 6411.723334       |        |

|                                                                              |                                                                             |             |                |            |
|------------------------------------------------------------------------------|-----------------------------------------------------------------------------|-------------|----------------|------------|
| 4022.383933                                                                  | 0.672578023                                                                 | 2.27E-06    | 6.80E-05       | CBX5       |
| 12                                                                           | 54230940                                                                    | 54280133    | - 15040        |            |
| protein_coding                                                               | chromobox 5 [Source:HGNC Symbol;Acc:HGNC:1555]                              |             |                | -          |
| 5958                                                                         | 5707                                                                        | 7212        | 4257 4242 3989 | 21.6644354 |
| 16.72992501                                                                  | 22.21315963                                                                 | 13.68538534 | 12.29083605    |            |
| 12.38118566                                                                  |                                                                             |             |                |            |
| ENSG00000165704                                                              | 2633.244774                                                                 | 2203.362862 | 2216.669009    |            |
| 1384.30879                                                                   | 1495.988619                                                                 | 1537.564719 | 2351.092215    |            |
| 1472.620709                                                                  | 0.674544364                                                                 | 2.28E-06    | 6.82E-05       | HPRT1      |
| X                                                                            | 134460153                                                                   | 134520513   | + 1624         |            |
| protein_coding                                                               | hypoxanthine phosphoribosyltransferase 1 [Source:HGNC Symbol;Acc:HGNC:5157] |             |                | -          |
| 1567                                                                         | 76.64449121                                                                 | 64.53229565 | 64.66480184    | 1637       |
| 41.02649439                                                                  | 43.92595904                                                                 | 45.04317624 |                |            |
| ENSG00000154229                                                              | 3149.249681                                                                 | 2017.045682 | 3168.066868    |            |
| 1447.597218                                                                  | 1368.962096                                                                 | 1739.695116 | 2778.120744    |            |
| 1518.751477                                                                  | 0.871026141                                                                 | 2.38E-06    | 7.08E-05       | PRKCA      |
| 17                                                                           | 66302636                                                                    | 66810743    | + 11152        |            |
| protein_coding                                                               | protein kinase C alpha [Source:HGNC Symbol;Acc:HGNC:9393]                   |             |                | -          |
| 1773                                                                         | 13.34842645                                                                 | 8.602805186 | 13.45843946    | 1498       |
| 6.247588784                                                                  | 5.853527329                                                                 | 7.421676338 |                |            |
| ENSG00000133316                                                              | 1055.149048                                                                 | 1563.766575 | 1239.848392    |            |
| 2468.248692                                                                  | 1878.895908                                                                 | 2719.92942  | 1286.254672    |            |
| 2355.69134                                                                   | -0.872202126                                                                | 2.38E-06    | 7.09E-05       | WDR74      |
| 11                                                                           | 62832342                                                                    | 62841809    | - 4247         |            |
| protein_coding                                                               | WD repeat domain 74 [Source:HGNC Symbol;Acc:HGNC:25529]                     |             |                | -          |
| 2772                                                                         | 11.74376332                                                                 | 17.5132513  | 13.83054991    | 2056       |
| 27.97203816                                                                  | 21.09596747                                                                 | 30.46891581 |                |            |
| ENSG00000138385                                                              | 2519.86253                                                                  | 2741.921475 | 2588.232408    |            |
| 1679.654787                                                                  | 1521.576696                                                                 | 1818.192358 | 2616.672137    |            |
| 1673.14128                                                                   | 0.64542893                                                                  | 2.42E-06    | 7.19E-05       | SSB        |
| 2                                                                            | 169791933                                                                   | 169812064   | + 5113         |            |
| protein_coding                                                               | Sjogren syndrome antigen B [Source:HGNC Symbol;Acc:HGNC:11316]              |             |                | -          |
| 1853                                                                         | 23.29575528                                                                 | 25.50682103 | 23.98173526    | 1665       |
| 15.81108585                                                                  | 14.19047859                                                                 | 16.91786918 |                |            |
| ENSG00000067064                                                              | 1666.024813                                                                 | 1537.811943 | 1795.237892    |            |
| 950.330998                                                                   | 1112.167471                                                                 | 995.9337523 | 1666.358216    |            |
| 1019.477407                                                                  | 0.708577538                                                                 | 2.44E-06    | 7.23E-05       | IDI1       |
| 10                                                                           | 1039152 1049170                                                             | - 4345      | protein_coding |            |
| isopentenyl-diphosphate delta isomerase 1 [Source:HGNC Symbol;Acc:HGNC:5387] |                                                                             |             |                | -          |
| 1015                                                                         | 18.12455799                                                                 | 16.8341256  | 19.57425997    | 1217       |
| 10.52695029                                                                  | 12.20560736                                                                 | 10.90491531 |                |            |
| ENSG00000249992                                                              | 16051.68629                                                                 | 22990.2422  | 13573.79761    |            |
| 26276.75255                                                                  | 30771.48979                                                                 | 41500.5104  | 17538.57537    |            |
| 32849.58425                                                                  | -0.905312071                                                                | 2.45E-06    | 7.25E-05       |            |
| TMEM158 3                                                                    | 45224466                                                                    | 45226278    | - 1813         |            |

|                                                               |                                               |             |             |             |                |                |  |
|---------------------------------------------------------------|-----------------------------------------------|-------------|-------------|-------------|----------------|----------------|--|
| protein_coding                                                | transmembrane protein 158 (gene/pseudogene)   |             |             |             |                |                |  |
| [Source:HGNC Symbol;Acc:HGNC:30293]                           | -                                             | 13874       | 24802       | 13882       |                |                |  |
| 26157                                                         | 33672                                         | 42295       | 418.5030224 | 603.1465626 |                |                |  |
| 354.6963274                                                   | 697.5757019                                   | 809.3375798 | 1089.023524 |             |                |                |  |
| ENSG00000059122                                               | 578.4808379                                   | 702.6289648 | 671.7475119 |             |                |                |  |
| 1100.013153                                                   | 1082.923955                                   | 1140.172434 | 650.9524382 |             |                |                |  |
| 1107.70318                                                    | -0.766007724                                  | 2.46E-06    | 7.27E-05    |             |                |                |  |
| FLYWCH1                                                       | 16                                            | 2911937     | 2951208     | +           | 8419           | protein_coding |  |
| FLYWCH-type zinc finger 1 [Source:HGNC Symbol;Acc:HGNC:25404] | -                                             |             |             |             |                |                |  |
| 500                                                           | 758                                           | 687         | 1095        | 1185        | 1162           | 3.247911654    |  |
| 3.96956259                                                    | 3.780059913                                   | 6.288612377 | 6.133613958 |             |                |                |  |
| 6.443052266                                                   |                                               |             |             |             |                |                |  |
| ENSG00000103257                                               | 12232.5558                                    | 16518.26933 | 16180.60819 |             |                |                |  |
| 26914.65972                                                   | 22630.826                                     | 22460.02324 | 14977.14444 |             |                |                |  |
| 24001.83632                                                   | -0.680292249                                  | 2.48E-06    | 7.31E-05    | SLC7A5      |                |                |  |
| 16                                                            | 87830023                                      | 87869488    | -           | 4745        |                |                |  |
| protein_coding                                                | solute carrier family 7 member 5 [Source:HGNC |             |             |             |                |                |  |
| Symbol;Acc:HGNC:11063]                                        | -                                             | 10573       | 17820       | 16548       | 26792          | 24764          |  |
| 22890                                                         | 121.8587526                                   | 165.5790707 | 161.5517814 |             |                |                |  |
| 273.0047065                                                   | 227.4276042                                   | 225.193376  |             |             |                |                |  |
| ENSG00000162840                                               | 205.9391783                                   | 243.78815   | 224.8936357 |             |                |                |  |
| 426.9457444                                                   | 493.4843338                                   | 452.3403545 | 224.8736547 |             |                |                |  |
| 457.5901442                                                   | -1.023996031                                  | 2.52E-06    | 7.41E-05    | MT2P1       |                |                |  |
| 4                                                             | 68376323                                      | 68376505    | +           | 183         |                |                |  |
| processed_pseudogene                                          | metallothionein 2 pseudogene 1 [Source:HGNC   |             |             |             |                |                |  |
| Symbol;Acc:HGNC:7407]                                         | -                                             | 178         | 263         | 230         | 425            | 540            |  |
| 461                                                           | 53.19411959                                   | 63.36342098 | 58.22093854 |             |                |                |  |
| 112.2894764                                                   | 128.5882447                                   | 117.5968995 |             |             |                |                |  |
| ENSG00000187123                                               | 440.8023984                                   | 331.8485084 | 448.809473  |             |                |                |  |
| 134.6134818                                                   | 178.2026761                                   | 208.9989056 | 407.15346   |             |                |                |  |
| 173.9383545                                                   | 1.226014367                                   | 2.54E-06    | 7.45E-05    | LYPD6       |                |                |  |
| 2                                                             | 149329985                                     | 149474148   | +           | 5033        |                |                |  |
| protein_coding                                                | LY6/PLAUR domain containing 6 [Source:HGNC    |             |             |             |                |                |  |
| Symbol;Acc:HGNC:28751]                                        | -                                             | 381         | 358         | 459         | 134            | 195            |  |
| 213                                                           | 4.139927713                                   | 3.136101096 | 4.22462545  |             |                |                |  |
| 1.28729797                                                    | 1.688364759                                   | 1.975598596 |             |             |                |                |  |
| ENSG00000139354                                               | 945.2376891                                   | 804.5935903 | 986.5986019 |             |                |                |  |
| 445.0281524                                                   | 571.1624234                                   | 485.7016821 | 912.1432937 |             |                |                |  |
| 500.6307526                                                   | 0.864770467                                   | 2.62E-06    | 7.67E-05    | GAS2L3      |                |                |  |
| 12                                                            | 100573683                                     | 100628286   | +           | 6799        |                |                |  |
| protein_coding                                                | growth arrest specific 2 like 3 [Source:HGNC  |             |             |             |                |                |  |
| Symbol;Acc:HGNC:27475]                                        | -                                             | 817         | 868         | 1009        | 443            | 625            |  |
| 495                                                           | 6.571609187                                   | 5.628706997 | 6.874618159 |             |                |                |  |
| 3.150357947                                                   | 4.00583977                                    | 3.398648053 |             |             |                |                |  |
| ENSG00000185049                                               | 748.5542042                                   | 959.3944308 | 1007.132369 |             |                |                |  |
| 1596.274795                                                   | 1559.958811                                   | 1468.879633 | 905.0270012 |             |                |                |  |
| 1541.704413                                                   | -0.767569899                                  | 2.62E-06    | 7.67E-05    | NELFA       |                |                |  |
| 4                                                             | 1982714                                       | 2041903     | -           | 5935        | protein_coding |                |  |
| negative elongation factor complex member A [Source:HGNC      |                                               |             |             |             |                |                |  |
| Symbol;Acc:HGNC:12768]                                        | -                                             | 647         | 1035        | 1030        | 1589           | 1707           |  |

|                               |                                                        |             |             |             |      |
|-------------------------------|--------------------------------------------------------|-------------|-------------|-------------|------|
| 1497                          | 5.961811908                                            | 7.688711838 | 8.039313362 |             |      |
| 12.94506962                   | 12.53347201                                            | 11.77462577 |             |             |      |
| ENSG00000129636               | 747.3972425                                            | 630.3267758 | 692.2812786 |             |      |
| 395.8038195                   | 386.5627281                                            | 315.9513973 | 690.0017656 |             |      |
| 366.1059816                   | 0.913746367                                            | 2.65E-06    | 7.72E-05    | ITFG1       |      |
| 16                            | 47154387                                               | 47464149    | -           | 7770        |      |
| protein_coding                | integrin alpha FG-GAP repeat containing 1 [Source:HGNC |             |             |             |      |
| Symbol;Acc:HGNC:30697]        | -                                                      | 646         | 680         | 708         | 394  |
| 322                           | 4.546803775                                            | 3.858529739 | 4.22099361  |             | 423  |
| 2.45175133                    | 2.372345543                                            | 1.934554142 |             |             |      |
| ENSG00000120738               | 205.9391783                                            | 564.5132448 | 338.318252  |             |      |
| 859.9189581                   | 936.7063744                                            | 929.2110969 | 369.590225  |             |      |
| 908.6121431                   | -1.295301631                                           | 2.66E-06    | 7.75E-05    | EGR1        |      |
| 5                             | 138465490                                              | 138469315   | +           | 3138        |      |
| protein_coding                | early growth response 1 [Source:HGNC                   |             |             |             |      |
| Symbol;Acc:HGNC:3238]         | zf-C2H2                                                | 178         | 609         | 346         | 856  |
| 947                           | 3.102142729                                            | 8.556542491 | 5.107702755 |             | 1025 |
| 13.18930897                   | 14.23408398                                            | 14.0877967  |             |             |      |
| ENSG00000186854               | 163.1315963                                            | 175.1937656 | 230.7604262 |             |      |
| 63.28842799                   | 70.36721056                                            | 53.96685357 | 189.6952627 |             |      |
| 62.54083071                   | 1.600778331                                            | 2.68E-06    | 7.76E-05    |             |      |
| TRABD2A 2                     | 84821650                                               | 84907008    | -           | 8771        |      |
| protein_coding                | TraB domain containing 2A [Source:HGNC                 |             |             |             |      |
| Symbol;Acc:HGNC:27013]        | -                                                      | 141         | 189         | 236         | 63   |
| 55                            | 0.87915351                                             | 0.950050413 | 1.246422694 |             | 77   |
| 0.347290301                   | 0.382560575                                            | 0.292724865 |             |             |      |
| ENSG00000277142               | 38.1797353                                             | 69.52133556 | 56.71230814 |             |      |
| 225.0255217                   | 219.3263706                                            | 129.5204486 | 54.80445967 |             |      |
| 191.2907803                   | -1.798315184                                           | 2.68E-06    | 7.76E-05    |             |      |
| LINC00235                     | 16                                                     | 525155      | 527407      | -           | 2253 |
| intergenic non-protein coding | RNA 235 [Source:HGNC                                   |             |             |             |      |
| Symbol;Acc:HGNC:14138]        | -                                                      | 33          | 75          | 58          | 224  |
| 132                           | 0.801027564                                            | 1.467688967 | 1.192529847 |             | 240  |
| 4.807154087                   | 4.642037534                                            | 2.735009098 |             |             |      |
| ENSG00000084234               | 6314.696826                                            | 5722.069392 | 7834.12091  |             |      |
| 4036.395296                   | 3712.098822                                            | 4513.59139  | 6623.629043 |             |      |
| 4087.361836                   | 0.696501879                                            | 2.68E-06    | 7.76E-05    | APLP2       |      |
| 11                            | 130068147                                              | 130144811   | +           | 7463        |      |
| protein_coding                | amyloid beta precursor like protein 2 [Source:HGNC     |             |             |             |      |
| Symbol;Acc:HGNC:598]          | -                                                      | 5458        | 6173        | 8012        | 4018 |
| 4600                          | 39.99583817                                            | 36.46840702 | 49.73131635 |             | 4062 |
| 26.03141089                   | 23.71838286                                            | 28.77334983 |             |             |      |
| ENSG00000188070               | 401.4657015                                            | 635.8884826 | 527.0333463 |             |      |
| 893.0700394                   | 1043.62798                                             | 1063.637623 | 521.4625101 |             |      |
| 1000.111881                   | -0.937978598                                           | 2.74E-06    | 7.92E-05    |             |      |
| C11orf95                      | 11                                                     | 63759892    | 63768775    | -           | 5948 |
| protein_coding                | chromosome 11 open reading frame 95                    |             |             |             |      |
| [Source:HGNC                  | Symbol;Acc:HGNC:28449]                                 | -           | 347         | 686         | 539  |
| 889                           | 1142                                                   | 1084        | 3.190459439 | 5.084954999 |      |
| 4.197785675                   | 7.226566735                                            | 8.36669123  | 8.507547022 |             |      |

|                                     |                                                       |             |             |       |
|-------------------------------------|-------------------------------------------------------|-------------|-------------|-------|
| ENSG00000204356                     | 2120.710752                                           | 2296.984927 | 1863.683781 |       |
| 3064.968155                         | 3619.798974                                           | 3244.879723 | 2093.793153 |       |
| 3309.882284                         | -0.660700728                                          | 2.84E-06    | 8.19E-05    | NELFE |
| 6                                   | 31952087                                              | 31959110    | - 2719      |       |
| protein_coding                      | negative elongation factor complex member E           |             |             |       |
| [Source:HGNC Symbol;Acc:HGNC:13974] | -                                                     | 1833        | 2478        | 1906  |
| 3051                                | 3961 3307                                             | 36.86786343 | 40.18149142 |       |
| 32.47253133                         | 54.2543065                                            | 63.48253087 | 56.77681459 |       |
| ENSG00000134775                     | 668.7238486                                           | 813.8631017 | 871.2183888 |       |
| 410.8724928                         | 396.6151868                                           | 464.1149407 | 784.6017797 |       |
| 423.8675401                         | 0.889179908                                           | 2.88E-06    | 8.29E-05    | FHOD3 |
| 18                                  | 36297714                                              | 36780055    | + 7965      |       |
| protein_coding                      | formin homology 2 domain containing 3 [Source:HGNC    |             |             |       |
| Symbol;Acc:HGNC:26178]              | -                                                     | 578 878     | 891 409     | 434   |
| 473                                 | 3.96859491                                            | 4.860071894 | 5.181963859 |       |
| 2.482782893                         | 2.374447366                                           | 2.772179812 |             |       |
| ENSG00000213694                     | 531.0454092                                           | 377.2691143 | 636.5467689 |       |
| 220.0026306                         | 266.8470842                                           | 158.9569142 | 514.9537641 |       |
| 215.2688763                         | 1.257292309                                           | 2.90E-06    | 8.33E-05    | S1PR3 |
| 9                                   | 88990863                                              | 89005010    | + 13578     |       |
| protein_coding                      | sphingosine-1-phosphate receptor 3 [Source:HGNC       |             |             |       |
| Symbol;Acc:HGNC:3167]               | -                                                     | 459 407     | 651 219     | 292   |
| 162                                 | 1.848721934                                           | 1.321577277 | 2.220995303 |       |
| 0.779847218                         | 0.937142524                                           | 0.55696159  |             |       |
| ENSG00000074696                     | 3754.340638                                           | 3052.450107 | 3017.485912 |       |
| 1956.918377                         | 2211.540903                                           | 2020.322755 | 3274.758886 |       |
| 2062.927345                         | 0.666300319                                           | 2.92E-06    | 8.38E-05    | HACD3 |
| 15                                  | 65530418                                              | 65578352    | + 7097      |       |
| protein_coding                      | 3-hydroxyacyl-CoA dehydratase 3 [Source:HGNC          |             |             |       |
| Symbol;Acc:HGNC:24175]              | -                                                     | 3245 3293   | 3086 1948   | 2420  |
| 2059                                | 25.00544621                                           | 20.45742103 | 20.14297308 |       |
| 13.27135798                         | 14.85932763                                           | 13.543396   |             |       |
| ENSG00000135956                     | 2091.78671                                            | 2017.972634 | 2176.579274 |       |
| 3567.257266                         | 2967.303022                                           | 3165.401266 | 2095.446206 |       |
| 3233.320518                         | -0.625694617                                          | 2.94E-06    | 8.40E-05    |       |
| TMEM127 2                           | 96248516                                              | 96265994    | - 6367      |       |
| protein_coding                      | transmembrane protein 127 [Source:HGNC                |             |             |       |
| Symbol;Acc:HGNC:26038]              | -                                                     | 1808 2177   | 2226 3551   | 3247  |
| 3226                                | 15.52952918                                           | 15.07500751 | 16.19544054 |       |
| 26.96603159                         | 22.22317143                                           | 23.65241819 |             |       |
| ENSG00000087460                     | 19376.79414                                           | 15874.03829 | 18239.85166 |       |
| 11018.21394                         | 12835.16198                                           | 11663.70888 | 17830.22803 |       |
| 11839.02827                         | 0.590699712                                           | 3.22E-06    | 9.21E-05    | GNAS  |
| 20                                  | 58839718                                              | 58911192    | + 13320     |       |
| protein_coding                      | GNAS complex locus [Source:HGNC Symbol;Acc:HGNC:4392] |             |             |       |
| -                                   | 16748 17125                                           | 18654 10968 | 14045 11887 |       |
| 68.76278217                         | 56.68397702                                           | 64.87392933 | 39.81295687 |       |
| 45.94900553                         | 41.65950197                                           |             |             |       |
| ENSG00000120708                     | 45986.91269                                           | 17588.8979  | 40045.73413 |       |
| 11360.77511                         | 6893.245055                                           | 8811.315365 | 34540.51491 |       |

|                                     |                                             |             |                                     |       |
|-------------------------------------|---------------------------------------------|-------------|-------------------------------------|-------|
| 9021.778511                         | 1.936804137                                 | 3.26E-06    | 9.31E-05                            | TGFBI |
| 5                                   | 136028895                                   | 136063818   | + 7810                              |       |
| protein_coding                      | transforming growth factor beta             | induced     | [Source:HGNC                        |       |
| Symbol;Acc:HGNC:11771]              | -                                           | 39748 18975 | 40955 11309                         | 7543  |
| 8980                                | 278.3293209                                 | 107.1185558 | 242.9172479                         |       |
| 70.01230671                         | 42.08735872                                 | 53.6749117  |                                     |       |
| ENSG00000120837                     | 696.4909288                                 | 718.3871342 | 684.4588913                         |       |
| 302.3780448                         | 437.7388813                                 | 356.1812336 | 699.7789848                         |       |
| 365.4327199                         | 0.936580396                                 | 3.36E-06    | 9.55E-05                            | NFYB  |
| 12                                  | 104117077                                   | 104138289   | - 4956                              |       |
| protein_coding                      | nuclear transcription factor Y subunit beta |             |                                     |       |
| [Source:HGNC Symbol;Acc:HGNC:7805]  | NF-YB                                       | 602         | 775                                 | 700   |
| 301                                 | 479 363                                     | 6.642933521 | 6.894525191                         |       |
| 6.54288366                          | 2.936543336                                 | 4.21175222  | 3.419175266                         |       |
| ENSG00000145107                     | 53.22023708                                 | 56.54401959 | 33.24514615                         |       |
| 181.8286582                         | 217.4986508                                 | 116.7646468 | 47.66980094                         |       |
| 172.0306519                         | -1.85284363                                 | 3.39E-06    | 9.64E-05                            |       |
| TM4SF19 3                           | 196319342                                   | 196338503   | - 1899                              |       |
| protein_coding                      | transmembrane 4 L six family member 19      |             | [Source:HGNC                        |       |
| Symbol;Acc:HGNC:25167]              | -                                           | 46 61       | 34 181                              | 238   |
| 119                                 | 1.324730635                                 | 1.41624643  | 0.829385442                         |       |
| 4.608449434                         | 5.461483049                                 | 2.925283978 |                                     |       |
| ENSG00000166845                     | 676.8225803                                 | 423.6166714 | 691.3034802                         |       |
| 304.3872013                         | 247.6560268                                 | 279.646423  | 597.2475773                         |       |
| 277.2298837                         | 1.106861975                                 | 3.41E-06    | 9.67E-05                            |       |
| C18orf54                            | 18 54357917                                 | 54385218    | + 6165                              |       |
| protein_coding                      | chromosome 18 open reading frame 54         |             |                                     |       |
| [Source:HGNC Symbol;Acc:HGNC:13796] | -                                           | 585         | 457                                 | 707   |
| 303                                 | 271 285                                     | 5.189404187 | 3.2682636                           |       |
| 5.312375788                         | 2.376351959                                 | 1.915555801 | 2.158031675                         |       |
| ENSG00000148296                     | 1386.040088                                 | 1580.451695 | 1318.072265                         |       |
| 2292.447503                         | 2109.188597                                 | 2378.466419 | 1428.188016                         |       |
| 2260.034173                         | -0.661844509                                | 3.53E-06    | 9.98E-05                            | SURF6 |
| 9                                   | 133328774                                   | 133336398   | - 4626                              |       |
| protein_coding                      | surfeit 6                                   |             | [Source:HGNC Symbol;Acc:HGNC:11478] | -     |
| 1198                                | 1705 1348                                   | 2282 2308   | 2424 14.16269499                    |       |
| 16.24997559                         | 13.49853757                                 | 23.85125459 | 21.74146345                         |       |
| 24.46093327                         |                                             |             |                                     |       |
| ENSG00000117385                     | 1398.766666                                 | 1345.933057 | 1968.308212                         |       |
| 878.001366                          | 668.0315704                                 | 963.5536401 | 1571.002645                         |       |
| 836.5288589                         | 0.909636146                                 | 3.71E-06    | 0.00010482                          | P3H1  |
| 1                                   | 42746335                                    | 42767084    | - 6766                              |       |
| protein_coding                      | prolyl 3-hydroxylase 1                      |             | [Source:HGNC                        |       |
| Symbol;Acc:HGNC:19316]              | -                                           | 1209 1452   | 2013 874                            | 731   |
| 982                                 | 9.772125147                                 | 9.461687081 | 13.7820632                          |       |
| 6.245693324                         | 4.708081599                                 | 6.775253203 |                                     |       |
| ENSG00000135862                     | 6629.390402                                 | 5037.052499 | 8150.927597                         |       |
| 4008.267106                         | 3381.281546                                 | 4125.030044 | 6605.790166                         |       |
| 3838.192899                         | 0.783313559                                 | 3.74E-06    | 0.00010552                          | LAMC1 |
| 1                                   | 183023460                                   | 183145592   | + 8406                              |       |

|                                         |                                                |             |                |               |       |            |  |
|-----------------------------------------|------------------------------------------------|-------------|----------------|---------------|-------|------------|--|
| protein_coding                          | laminin subunit gamma 1 [Source:HGNC           |             |                |               |       |            |  |
| Symbol;Acc:HGNC:6492]                   | -                                              | 5730        | 5434           | 8336          | 3990  | 3700       |  |
| 4204                                    | 37.27863047                                    | 28.50126961 |                | 45.93786172   |       |            |  |
| 22.95010762                             | 19.18098634                                    | 23.34636965 |                |               |       |            |  |
| ENSG00000105048                         | 194.3695615                                    | 282.720098  |                | 174.0481181   |       |            |  |
| 406.8541799                             | 465.1546776                                    | 680.9635705 |                | 217.0459259   |       |            |  |
| 517.657476                              | -1.252573292                                   | 3.76E-06    |                | 0.000105832   |       | TNNT1      |  |
| 19                                      | 55132794                                       | 55149354    |                | -             | 2171  |            |  |
| protein_coding                          | "troponin T1, slow skeletal type [Source:HGNC  |             |                |               |       |            |  |
| Symbol;Acc:HGNC:11948]"                 | -                                              | 168         | 305            | 178           | 405   | 509        |  |
| 694                                     | 4.2319855                                      | 6.194039547 |                | 3.798067114   |       |            |  |
| 9.01978979                              | 10.21683916                                    | 14.92264072 |                |               |       |            |  |
| ENSG00000101150                         | 7679.911603                                    | 8273.965883 |                | 6902.27902    |       |            |  |
| 11202.05175                             | 11616.0729                                     | 10873.83039 |                | 7618.718835   |       |            |  |
| 11230.65168                             | -0.559813507                                   | 3.79E-06    |                | 0.000106476   |       |            |  |
| TPD52L2 20                              | 63865228                                       | 63891545    |                | +             | 4694  |            |  |
| protein_coding                          | tumor protein D52 like 2 [Source:HGNC          |             |                |               |       |            |  |
| Symbol;Acc:HGNC:12007]                  | -                                              | 6638        | 8926           | 7059          | 11151 | 12711      |  |
| 11082                                   | 77.33727679                                    | 83.83932155 |                | 69.66306083   |       |            |  |
| 114.8608292                             | 118.0035931                                    | 110.2100239 |                |               |       |            |  |
| ENSG00000128564                         | 65.94681552                                    | 176.1207168 |                | 83.11286537   |       |            |  |
| 220.0026306                             | 482.5180153                                    | 387.5801302 |                | 108.3934659   |       |            |  |
| 363.3669254                             | -1.741326137                                   | 3.93E-06    |                | 0.000110232   |       | VGf        |  |
| 7                                       | 101162509                                      | 101165593   |                | -             | 2704  |            |  |
| protein_coding                          | VGf nerve growth factor inducible [Source:HGNC |             |                |               |       |            |  |
| Symbol;Acc:HGNC:12684]                  | -                                              | 57          | 190            | 85            | 219   | 528        |  |
| 395                                     | 1.15282366                                     | 3.097996135 |                | 1.456178767   |       |            |  |
| 3.91596358                              | 8.509143211                                    | 6.819247359 |                |               |       |            |  |
| ENSG00000109943                         | 21.98227184                                    | 25.95463194 |                | 28.35615407   |       | 0          |  |
| 0                                       | 0                                              | 25.43101928 | 0              | 7.162062725   |       |            |  |
| 3.99E-06                                | 0.000111657                                    | CRTAM       | 11             | 122838500     |       |            |  |
| 122872639                               | +                                              | 2675        | protein_coding | cytotoxic and |       |            |  |
| regulatory T cell molecule [Source:HGNC | Symbol;Acc:HGNC:24313]                         | -           |                |               |       |            |  |
| 19                                      | 28                                             | 29          | 0              | 0             | 0     | 0.38844052 |  |
| 0.461496278                             | 0.502199953                                    | 0           | 0              | 0             | 0     |            |  |
| ENSG00000156876                         | 838.7972149                                    | 862.9915121 |                | 968.020432    |       |            |  |
| 441.0098395                             | 531.8664487                                    | 538.6873202 |                | 889.9363863   |       |            |  |
| 503.8545361                             | 0.820630448                                    | 4.00E-06    |                | 0.000111657   |       | SASS6      |  |
| 1                                       | 100083563                                      | 100132955   |                | -             | 3972  |            |  |
| protein_coding                          | SAS-6 centriolar assembly protein [Source:HGNC |             |                |               |       |            |  |
| Symbol;Acc:HGNC:25403]                  | -                                              | 725         | 931            | 990           | 439   | 582        |  |
| 549                                     | 9.98213593                                     | 10.33414139 |                | 11.54591645   |       |            |  |
| 5.343877535                             | 6.385168207                                    | 6.452219605 |                |               |       |            |  |
| ENSG00000136104                         | 1510.991948                                    | 1389.49976  |                | 1511.676351   |       |            |  |
| 875.9922096                             | 757.5898384                                    | 1001.821045 |                | 1470.722687   |       |            |  |
| 878.4676978                             | 0.743594256                                    | 4.10E-06    |                | 0.000114259   |       |            |  |
| RNASEH2B                                | 13                                             | 50909678    | 51024120       | +             |       | 26291      |  |
| protein_coding                          | ribonuclease H2 subunit B [Source:HGNC         |             |                |               |       |            |  |
| Symbol;Acc:HGNC:25671]                  | -                                              | 1306        | 1499           | 1546          | 872   | 829        |  |
| 1021                                    | 2.716631828                                    | 2.513787056 |                | 2.723985806   |       |            |  |



|                                                                    |              |             |             |             |      |        |
|--------------------------------------------------------------------|--------------|-------------|-------------|-------------|------|--------|
| 1.603653721                                                        | 1.374061031  | 1.812861696 |             |             |      |        |
| ENSG00000147799                                                    | 469.7264403  | 607.1529973 | 518.2331606 |             |      |        |
| 1088.962793                                                        | 802.3689724  | 1053.825468 | 531.7041994 |             |      |        |
| 981.7190777                                                        | -0.883468226 | 4.11E-06    | 0.000114259 |             |      |        |
| ARHGAP39                                                           | 8            | 144529179   | 144605816   | -           |      | 4888   |
| protein_coding Rho GTPase activating protein 39 [Source:HGNC       |              |             |             |             |      |        |
| Symbol;Acc:HGNC:29351]                                             | -            | 406         | 655         | 530         | 1084 | 878    |
| 1074                                                               | 4.542443656  | 5.908048621 | 5.022814371 |             |      |        |
| 10.72258016                                                        | 7.827479095  | 10.25697082 |             |             |      |        |
| ENSG00000100629                                                    | 267.2581471  | 288.2818048 | 299.2063153 |             |      |        |
| 130.5951689                                                        | 128.8542427  | 104.9900606 | 284.9154224 |             |      |        |
| 121.4798241                                                        | 1.230040156  | 4.12E-06    | 0.000114259 |             |      | CEP128 |
| 14                                                                 | 80476983     | 80959517    | -           | 9400        |      |        |
| protein_coding centrosomal protein 128 [Source:HGNC                |              |             |             |             |      |        |
| Symbol;Acc:HGNC:20359]                                             | -            | 231         | 311         | 306         | 130  | 141    |
| 107                                                                | 1.343936778  | 1.458701714 | 1.507981552 |             |      |        |
| 0.668677508                                                        | 0.65365691   | 0.53137603  |             |             |      |        |
| ENSG00000130821                                                    | 5111.456683  | 6458.068598 | 5345.623941 |             |      |        |
| 7528.309196                                                        | 9398.134979  | 12465.36196 | 5638.383074 |             |      |        |
| 9797.268712                                                        | -0.797009186 | 4.12E-06    | 0.000114259 |             |      | SLC6A8 |
| X                                                                  | 153688099    | 153696593   | +           | 5498        |      |        |
| protein_coding solute carrier family 6 member 8 [Source:HGNC       |              |             |             |             |      |        |
| Symbol;Acc:HGNC:11055]                                             | -            | 4418        | 6967        | 5467        | 7494 | 10284  |
| 12704                                                              | 43.94562938  | 55.86953194 | 46.06242459 |             |      |        |
| 65.90375646                                                        | 81.51094538  | 107.8653074 |             |             |      |        |
| ENSG00000170961                                                    | 857.3086017  | 605.299095  | 419.4755205 |             |      |        |
| 1101.017731                                                        | 1232.796975  | 1755.394564 | 627.3610724 |             |      |        |
| 1363.069757                                                        | -1.120670799 | 4.15E-06    | 0.000115061 |             |      | HAS2   |
| 8                                                                  | 121612116    | 121641390   | -           | 4190        |      |        |
| protein_coding hyaluronan synthase 2 [Source:HGNC                  |              |             |             |             |      |        |
| Symbol;Acc:HGNC:4819]                                              | -            | 741         | 653         | 429         | 1096 | 1349   |
| 1789                                                               | 9.67161272   | 6.871208331 | 4.742919188 |             |      |        |
| 12.64729788                                                        | 14.02996296  | 19.93160874 |             |             |      |        |
| ENSG00000116459                                                    | 5370.616099  | 5214.100167 | 5186.242799 |             |      |        |
| 3023.780448                                                        | 3528.412987  | 3815.947155 | 5256.986355 |             |      |        |
| 3456.046863                                                        | 0.60503337   | 4.21E-06    | 0.000116289 |             |      | ATP5PB |
| 1                                                                  | 111448864    | 111462773   | +           | 3383        |      |        |
| protein_coding ATP synthase peripheral stalk-membrane subunit b    |              |             |             |             |      |        |
| [Source:HGNC Symbol;Acc:HGNC:840]                                  | -            |             | 4642        | 5625        |      | 5304   |
| 3010                                                               | 3861         | 3889        | 75.04086838 | 73.30852594 |      |        |
| 72.62798135                                                        | 43.01953525  | 49.73434488 | 53.66386905 |             |      |        |
| ENSG00000162627                                                    | 1578.095726  | 1270.850014 | 1380.651364 |             |      |        |
| 450.0510435                                                        | 931.2232151  | 679.982355  | 1409.865701 |             |      |        |
| 687.0855378                                                        | 1.036141469  | 4.26E-06    | 0.000117664 |             |      | SNX7   |
| 1                                                                  | 98661701     | 98760500    | +           | 2067        |      |        |
| protein_coding sorting nexin 7 [Source:HGNC Symbol;Acc:HGNC:14971] |              |             |             |             |      |        |
| -                                                                  | 1364         | 1371        | 1412        | 448         | 1019 | 693    |
| 36.08848132                                                        | 29.24360682  | 31.64438618 | 10.47945637 |             |      |        |
| 21.48287023                                                        | 15.65088116  |             |             |             |      |        |
| ENSG00000171606                                                    | 321.6353458  | 393.9542349 | 320.7178805 |             |      |        |

|                                         |                                                      |             |             |                 |
|-----------------------------------------|------------------------------------------------------|-------------|-------------|-----------------|
| 596.7194639                             | 713.7245643                                          | 639.7525187 | 345.4358204 |                 |
| 650.0655156                             | -0.91146467                                          | 4.31E-06    | 0.000118691 | ZNF274          |
| 19                                      | 58183029                                             | 58213562    | + 8333      |                 |
| protein_coding                          | zinc finger protein 274 [Source:HGNC                 |             |             |                 |
| Symbol;Acc:HGNC:13068]                  | zf-C2H2                                              | 278 425     | 328 594     | 781             |
| 652                                     | 1.824475882                                          | 2.248648151 | 1.823370473 |                 |
| 3.446563462                             | 4.084211744                                          | 3.652517032 |             |                 |
| ENSG00000216775                         | 325.1062309                                          | 276.23144   | 321.6956789 |                 |
| 95.43493109                             | 143.4760008                                          | 142.2762503 | 307.6777833 |                 |
| 127.0623941                             | 1.274481822                                          | 4.40E-06    | 0.000121058 |                 |
| AL109918.1                              | 6 52664366                                           | 52669155    | + 3821      |                 |
|                                         | transcribed_unprocessed_pseudogene                   |             |             | uncharacterized |
| LOC730101 [Source:NCBI gene;Acc:730101] | -                                                    |             | 281 298     | 329             |
| 95                                      | 157 145                                              | 4.021832645 | 3.438532903 |                 |
| 3.988607633                             | 1.202119893                                          | 1.790528394 | 1.771483046 |                 |
| ENSG00000261371                         | 194.3695615                                          | 194.6597396 | 201.4264737 |                 |
| 69.31589732                             | 58.48703215                                          | 83.40331915 | 196.8185916 |                 |
| 70.40208288                             | 1.484187787                                          | 4.42E-06    | 0.000121258 | PECAM1          |
| 17                                      | 64319415                                             | 64413776    | - 7759      |                 |
| protein_coding                          | platelet and endothelial cell adhesion molecule 1    |             |             |                 |
| [Source:HGNC Symbol;Acc:HGNC:8823]      | -                                                    |             | 168 210     | 206             |
| 69                                      | 64 85                                                | 1.184126888 | 1.193294121 |                 |
| 1.229883356                             | 0.429976337                                          | 0.359445309 | 0.511398217 |                 |
| ENSG00000123416                         | 13243.7403                                           | 12428.5609  | 15910.73583 |                 |
| 8298.820692                             | 9356.097425                                          | 9540.358496 | 13861.01234 |                 |
| 9065.092204                             | 0.612629172                                          | 4.43E-06    | 0.000121272 | TUBA1B          |
| 12                                      | 49127782                                             | 49131397    | - 3574      |                 |
| protein_coding                          | tubulin alpha 1b [Source:HGNC Symbol;Acc:HGNC:18809] |             |             |                 |
| -                                       | 11447 13408                                          | 16272 8261  | 10238 9723  |                 |
| 175.1587541                             | 165.403011                                           | 210.9059554 | 111.7581722 |                 |
| 124.8300587                             | 126.9965062                                          |             |             |                 |
| ENSG00000116786                         | 2183.186682                                          | 2926.384752 | 2759.34713  |                 |
| 4526.629468                             | 4418.512507                                          | 3749.2245   | 2622.972855 |                 |
| 4231.455492                             | -0.689559761                                         | 4.59E-06    | 0.000125508 |                 |
| PLEKHM2 1                               | 15684332                                             | 15734769    | + 4122      |                 |
| protein_coding                          | pleckstrin homology and RUN domain containing M2     |             |             |                 |
| [Source:HGNC Symbol;Acc:HGNC:29131]     | -                                                    |             | 1887 3157   | 2822            |
| 4506                                    | 4835 3821                                            | 25.03563582 | 33.76762782 |                 |
| 31.71403329                             | 52.85479788                                          | 51.11484977 | 43.27280883 |                 |
| ENSG00000127863                         | 739.2985108                                          | 596.0295836 | 1013.976958 |                 |
| 412.8816493                             | 310.7123583                                          | 408.1856561 | 783.101684  |                 |
| 377.2598879                             | 1.05406862                                           | 4.60E-06    | 0.000125508 |                 |
| TNFRSF19                                | 13 23570370                                          | 23676104    | + 5113      |                 |
|                                         | protein_coding TNF receptor superfamily member 19    |             |             |                 |
| [Source:HGNC Symbol;Acc:HGNC:11915]     | -                                                    |             | 639 643     | 1037            |
| 411                                     | 340 416                                              | 6.834705062 | 5.54458618  |                 |
| 9.395186802                             | 3.886576726                                          | 2.897755388 | 3.798075326 |                 |
| ENSG00000173848                         | 992.6731178                                          | 844.4524893 | 1091.223032 |                 |
| 570.6004301                             | 575.7317228                                          | 384.6364836 | 976.1162132 |                 |
| 510.3228788                             | 0.935294737                                          | 4.63E-06    | 0.000126131 | NET1            |

|                                                                                    |                                                              |             |      |             |                |             |
|------------------------------------------------------------------------------------|--------------------------------------------------------------|-------------|------|-------------|----------------|-------------|
| 10                                                                                 | 5412551                                                      | 5458463     | +    | 4175        | protein_coding |             |
| neuroepithelial cell transforming 1 [Source:HGNC Symbol;Acc:HGNC:14592]            | -                                                            | 858         | 911  | 1116        | 568            | 630         |
| 392                                                                                | 11.23894435                                                  | 9.620460374 |      | 12.38255229 |                |             |
| 6.577987932                                                                        | 6.575710235                                                  | 4.383041907 |      |             |                |             |
| ENSG00000158290                                                                    | 4200.927845                                                  | 3799.572726 |      | 4080.352791 |                |             |
| 2312.539067                                                                        | 2821.085442                                                  | 2751.328317 |      | 4026.95112  |                |             |
| 2628.317608                                                                        | 0.615342091                                                  | 4.69E-06    |      | 0.000127483 |                | CUL4B       |
| X                                                                                  | 120524609                                                    | 120575794   |      | -           | 7031           |             |
| protein_coding                                                                     | cullin 4B [Source:HGNC Symbol;Acc:HGNC:2555]                 |             |      |             |                | -           |
| 3631                                                                               | 4099                                                         | 4173        | 2302 | 3087        | 2804           | 28.24254723 |
| 25.70364878                                                                        | 27.49373501                                                  | 15.83031067 |      | 19.13278227 |                |             |
| 18.61688205                                                                        |                                                              |             |      |             |                |             |
| ENSG00000260032                                                                    | 7495.954697                                                  | 5351.288936 |      | 7193.662948 |                |             |
| 12444.71501                                                                        | 10795.42673                                                  | 9554.095513 |      | 6680.302194 |                |             |
| 10931.41242                                                                        | -0.710616659                                                 | 4.72E-06    |      | 0.000128121 |                | NORAD       |
| 20                                                                                 | 36045622                                                     | 36050960    |      | -           | 5339           |             |
| lincRNA non-coding RNA activated by DNA damage [Source:HGNC Symbol;Acc:HGNC:44311] | -                                                            | 6479        | 5773 | 7357        | 12388          | 11813       |
| 9737                                                                               | 66.36556129                                                  | 47.67334164 |      | 63.83271122 |                |             |
| 112.1869891                                                                        | 96.41816921                                                  | 85.13561644 |      |             |                |             |
| ENSG00000088888                                                                    | 2142.693023                                                  | 2049.488972 |      | 2471.874396 |                |             |
| 3330.176806                                                                        | 3459.873496                                                  | 3357.719508 |      | 2221.352131 |                |             |
| 3382.589937                                                                        | -0.606671576                                                 | 4.87E-06    |      | 0.00013208  |                | MAVS        |
| 20                                                                                 | 3846799                                                      | 3876123     | +    | 11771       | protein_coding |             |
| mitochondrial antiviral signaling protein [Source:HGNC Symbol;Acc:HGNC:29233]      | -                                                            | 1852        | 2211 | 2528        | 3315           | 3786        |
| 3422                                                                               | 8.604434549                                                  | 8.281506381 |      | 9.948696121 |                |             |
| 13.61668496                                                                        | 14.01605676                                                  | 13.57102596 |      |             |                |             |
| ENSG00000149781                                                                    | 237.1771435                                                  | 371.7074075 |      | 161.3367387 |                |             |
| 562.5638043                                                                        | 740.2265007                                                  | 559.2928461 |      | 256.7404299 |                |             |
| 620.6943837                                                                        | -1.272591722                                                 | 4.96E-06    |      | 0.000134272 |                | FERMT3      |
| 11                                                                                 | 64206678                                                     | 64223886    |      | +           | 3066           |             |
| protein_coding                                                                     | fermitin family member 3 [Source:HGNC Symbol;Acc:HGNC:23151] | -           | 205  | 401         | 165            | 560         |
| 570                                                                                | 3.656591314                                                  | 5.766418789 |      | 2.492953911 |                | 810         |
| 8.831146574                                                                        | 11.51254832                                                  | 8.678581395 |      |             |                |             |
| ENSG00000111716                                                                    | 572.6960295                                                  | 708.1906716 |      | 741.1711995 |                |             |
| 325.4833439                                                                        | 347.2667534                                                  | 399.3547164 |      | 674.0193002 |                |             |
| 357.3682713                                                                        | 0.916107747                                                  | 5.01E-06    |      | 0.00013528  |                | LDHB        |
| 12                                                                                 | 21635342                                                     | 21757857    |      | -           | 2983           |             |
| protein_coding                                                                     | lactate dehydrogenase B [Source:HGNC Symbol;Acc:HGNC:6541]   | -           | 495  | 764         | 758            | 324         |
| 407                                                                                | 9.075000514                                                  | 11.29208304 |      | 11.77113683 |                | 380         |
| 5.251616127                                                                        | 5.551226414                                                  | 6.369233808 |      |             |                |             |
| ENSG00000073969                                                                    | 1558.427377                                                  | 1287.535135 |      | 1590.878023 |                |             |
| 818.7312509                                                                        | 986.9686676                                                  | 843.8453467 |      | 1478.946845 |                |             |
| 883.1817551                                                                        | 0.743238035                                                  | 5.07E-06    |      | 0.000136789 |                | NSF         |
| 17                                                                                 | 46590669                                                     | 46757464    |      | +           | 5005           |             |
| protein_coding                                                                     | "N-ethylmaleimide sensitive factor, vesicle fusing           |             |      |             |                |             |

|                                                            |              |             |             |
|------------------------------------------------------------|--------------|-------------|-------------|
| ATPase [Source:HGNC Symbol;Acc:HGNC:8016]"                 | -            | 1347        | 1389        |
| 1627 815 1080 860 14.71831952                              |              | 12.23579302 |             |
| 15.0586461 7.873262719 9.403256252                         |              | 8.02121958  |             |
| ENSG00000139318                                            | 1343.232506  | 1346.860008 | 881.9741714 |
| 1749.975263                                                | 2613.639249  | 2282.307298 | 1190.688895 |
| 2215.30727                                                 | -0.896077182 | 5.17E-06    | 0.000139113 |
| 12                                                         | 89347232     | 89353271    | - 4632      |
| protein_coding dual specificity phosphatase 6 [Source:HGNC |              |             |             |
| Symbol;Acc:HGNC:3072]                                      | -            | 1161 1453   | 902 1742    |
| 2326                                                       | 13.70750401  | 13.83028156 | 9.020704213 |
| 18.18363966                                                | 26.9064301   | 23.441597   |             |
| ENSG00000143127                                            | 2685.308049  | 1880.783865 | 3202.289813 |
| 1245.676995                                                | 1149.635726  | 1702.408926 | 2589.460576 |
| 1365.907216                                                | 0.922764072  | 5.18E-06    | 0.000139223 |
| 1                                                          | 145891208    | 145910189   | - 6320      |
| protein_coding integrin subunit alpha 10 [Source:HGNC      |              |             |             |
| Symbol;Acc:HGNC:6135]                                      | -            | 2321 2029   | 3275 1240   |
| 1735                                                       | 20.08411849  | 14.15464321 | 24.00472206 |
| 9.4864959                                                  | 8.67405478   | 12.81528995 |             |
| ENSG00000101003                                            | 1218.280645  | 972.3717467 | 1191.936269 |
| 708.2276465                                                | 656.151392   | 616.2033462 | 1127.529554 |
| 660.1941282                                                | 0.771828983  | 5.28E-06    | 0.000141503 |
| 20                                                         | 25407727     | 25452628    | + 4068      |
| protein_coding GINS complex subunit 1 [Source:HGNC         |              |             |             |
| Symbol;Acc:HGNC:28980]                                     | -            | 1053 1049   | 1219 705    |
| 628                                                        | 14.15605169  | 11.36916323 | 13.88114265 |
| 8.379331829                                                | 7.691341554  | 7.206505714 |             |
| ENSG00000150764                                            | 1629.002039  | 1119.756978 | 1682.791074 |
| 850.8777541                                                | 864.511444   | 768.2917517 | 1477.183364 |
| 827.8936499                                                | 0.83485889   | 5.29E-06    | 0.000141503 |
| 11                                                         | 111927144    | 112022584   | + 8509      |
| protein_coding DIX domain containing 1 [Source:HGNC        |              |             |             |
| Symbol;Acc:HGNC:23695]                                     | -            | 1408 1208   | 1721 847    |
| 783                                                        | 9.049380385  | 6.259251017 | 9.369249462 |
| 4.812891854                                                | 4.844748205  | 4.295653813 |             |
| ENSG00000160606                                            | 151.5619795  | 176.1207168 | 148.6253593 |
| 403.8404453                                                | 414.8923843  | 275.721561  | 158.7693518 |
| 364.8181302                                                | -1.199632709 | 5.30E-06    | 0.000141638 |
| 17                                                         | 28724348     | 28727935    | - 1311      |
| protein_coding TLC domain containing 1 [Source:HGNC        |              |             |             |
| Symbol;Acc:HGNC:25177]                                     | -            | 131 190     | 152 402     |
| 281                                                        | 5.464662145  | 6.389764722 | 5.370854065 |
| 14.82601987                                                | 15.09078247  | 10.00575038 |             |
| ENSG00000130589                                            | 491.7087122  | 953.8327239 | 498.6771922 |
| 1193.438928                                                | 1892.603806  | 1237.31277  | 648.0728761 |
| 1441.118501                                                | -1.152076167 | 5.31E-06    | 0.000141676 |
| 20                                                         | 63558086     | 63574239    | - 12066     |
| protein_coding helicase with zinc finger 2 [Source:HGNC    |              |             |             |
| Symbol;Acc:HGNC:30021]                                     | -            | 425 1029    | 510 1188    |
| 1261                                                       | 1.92628402   | 3.759984129 | 1.957984777 |

|                        |                                                   |             |                 |        |  |  |
|------------------------|---------------------------------------------------|-------------|-----------------|--------|--|--|
| 4.760519365            | 7.47954838                                        | 4.878629094 |                 |        |  |  |
| ENSG00000136631        | 1159.275599                                       | 1152.200268 | 1237.892795     |        |  |  |
| 602.7469332            | 737.4849211                                       | 766.3293207 | 1183.122887     |        |  |  |
| 702.1870583            | 0.75249027                                        | 5.37E-06    | 0.000143107     | VPS45  |  |  |
| 1                      | 150067279                                         | 150145329   | + 6637          |        |  |  |
| protein_coding         | vacuolar protein sorting 45 homolog [Source:HGNC  |             |                 |        |  |  |
| Symbol;Acc:HGNC:14579] | -                                                 | 1002 1243   | 1266 600        | 807    |  |  |
| 781                    | 8.256397936                                       | 8.257208842 | 8.83617572      |        |  |  |
| 4.370998417            | 5.298589992                                       | 5.493197985 |                 |        |  |  |
| ENSG0000008324         | 485.9239038                                       | 441.228743  | 470.3210382     |        |  |  |
| 242.1033515            | 189.1689946                                       | 258.0596816 | 465.8245617     |        |  |  |
| 229.7773426            | 1.019987181                                       | 5.46E-06    | 0.000145129     | SS18L2 |  |  |
| 3                      | 42581840                                          | 42595114    | + 1298          |        |  |  |
| protein_coding         | SS18 like 2 [Source:HGNC Symbol;Acc:HGNC:15593] - |             |                 |        |  |  |
| 420                    | 476 481                                           | 241 207     | 263 17.69576371 |        |  |  |
| 16.16836922            | 17.16614749                                       | 8.977255104 | 6.949511065     |        |  |  |
| 9.458605055            |                                                   |             |                 |        |  |  |
| ENSG00000091651        | 1000.771849                                       | 808.3013948 | 736.2822074     |        |  |  |
| 433.9777919            | 527.2971493                                       | 395.4298543 | 848.4518172     |        |  |  |
| 452.2349318            | 0.906625409                                       | 5.56E-06    | 0.000147623     | ORC6   |  |  |
| 16                     | 46689643                                          | 46698394    | + 4309          |        |  |  |
| protein_coding         | origin recognition complex subunit 6 [Source:HGNC |             |                 |        |  |  |
| Symbol;Acc:HGNC:17151] | -                                                 | 865 872     | 753 432         | 577    |  |  |
| 403                    | 10.97828058                                       | 8.922240979 | 8.095076139     |        |  |  |
| 4.847395655            | 5.835229168                                       | 4.365908081 |                 |        |  |  |
| ENSG00000140450        | 229.0784118                                       | 240.0803455 | 172.0925212     |        |  |  |
| 500.2799546            | 423.1171232                                       | 419.9602423 | 213.7504262     |        |  |  |
| 447.7857734            | -1.067049295                                      | 5.59E-06    | 0.000148031     | ARRDC4 |  |  |
| 15                     | 97960698                                          | 97973838    | + 4072          |        |  |  |
| protein_coding         | arrestin domain containing 4 [Source:HGNC         |             |                 |        |  |  |
| Symbol;Acc:HGNC:28087] | -                                                 | 198 259     | 176 498         | 463    |  |  |
| 428                    | 2.659206929                                       | 2.804309561 | 2.002199526     |        |  |  |
| 5.913203018            | 4.954864923                                       | 4.906615603 |                 |        |  |  |
| ENSG00000167526        | 53342.87502                                       | 72048.20437 | 61826.19385     |        |  |  |
| 85194.2607             | 98232.62594                                       | 113635.5505 | 62405.75775     |        |  |  |
| 99020.81239            | -0.666036858                                      | 5.74E-06    | 0.000151765     | RPL13  |  |  |
| 16                     | 89560657                                          | 89566828    | + 6172          |        |  |  |
| protein_coding         | ribosomal protein L13 [Source:HGNC                |             |                 |        |  |  |
| Symbol;Acc:HGNC:10303] | -                                                 | 46106 77726 | 63230 84806     | 107492 |  |  |
| 115811                 | 408.5321516                                       | 555.2318347 | 474.5693875     |        |  |  |
| 664.3575558            | 758.9424131                                       | 875.9310674 |                 |        |  |  |
| ENSG00000117298        | 2320.865121                                       | 2257.126028 | 4018.75149      |        |  |  |
| 1640.476237            | 1185.276261                                       | 1588.587926 | 2865.58088      |        |  |  |
| 1471.446808            | 0.961870979                                       | 5.78E-06    | 0.000152439     | ECE1   |  |  |
| 1                      | 21217247                                          | 21345572    | - 7333          |        |  |  |
| protein_coding         | endothelin converting enzyme 1 [Source:HGNC       |             |                 |        |  |  |
| Symbol;Acc:HGNC:3146]  | -                                                 | 2006 2435   | 4110 1633       | 1297   |  |  |
| 1619                   | 14.96042587                                       | 14.64034256 | 25.96346148     |        |  |  |
| 10.76727279            | 7.70755955                                        | 10.30649981 |                 |        |  |  |
| ENSG00000140795        | 33.5518886                                        | 38.93194792 | 59.64570339     | 0      |  |  |

|                                                                      |              |             |             |                |             |
|----------------------------------------------------------------------|--------------|-------------|-------------|----------------|-------------|
|                                                                      | 4.569299387  | 0           | 44.04317997 | 1.523099796    |             |
| 4.810934319                                                          | 5.78E-06     |             | 0.000152439 | MYLK3          | 16          |
| 46703369                                                             | 46790407     |             | - 9522      | protein_coding | myosin      |
| light chain kinase 3 [Source:HGNC Symbol;Acc:HGNC:29826]             |              |             |             |                |             |
|                                                                      | 29           | 42          | 61          | 0              | 5           |
|                                                                      | 0.1944711    |             | 0.296759147 | 0              | 0           |
| ENSG00000109586                                                      | 709.2175072  |             | 708.1906716 | 853.6180173    |             |
| 212.9705831                                                          | 446.8774801  |             | 372.8618974 | 757.008732     |             |
| 344.2366535                                                          | 1.136142846  |             | 5.84E-06    | 0.000153656    | GALNT7      |
|                                                                      | 4            | 173168753   | 173323967   | +              | 6865        |
| protein_coding polypeptide N-acetylgalactosaminyltransferase 7       |              |             |             |                |             |
| [Source:HGNC Symbol;Acc:HGNC:4129]                                   |              |             |             |                |             |
|                                                                      | 212          | 489         | 380         | 4.883313945    | 4.906669149 |
| 5.890825498                                                          | 1.493126268  |             | 3.104037185 | 2.583979661    |             |
| ENSG00000105447                                                      | 4115.312681  |             | 4609.728023 | 4735.477729    |             |
| 7012.960568                                                          | 6170.381892  |             | 6736.044541 | 4486.839478    |             |
| 6639.795667                                                          | -0.5652459   |             | 5.93E-06    | 0.000155806    | GRWD1       |
|                                                                      | 19           | 48445773    | 48457022    | +              | 5763        |
| protein_coding glutamate rich WD repeat containing 1 [Source:HGNC    |              |             |             |                |             |
| Symbol;Acc:HGNC:21270]                                               |              |             |             |                |             |
|                                                                      | 6865         | 33.75436625 | 38.04554394 | 38.92855697    |             |
| 58.56932716                                                          | 51.05548567  |             | 55.60808737 |                |             |
| ENSG00000101188                                                      | 128.422746   |             | 241.0072966 | 89.95745429    |             |
| 315.4375617                                                          | 464.2408177  |             | 541.6309667 | 153.1291656    |             |
| 440.4364487                                                          | -1.522157204 |             | 6.28E-06    | 0.000164514    | NTSR1       |
|                                                                      | 20           | 62708837    | 62762771    | +              | 4237        |
| protein_coding neurotensin receptor 1 [Source:HGNC                   |              |             |             |                |             |
| Symbol;Acc:HGNC:8039]                                                |              |             |             |                |             |
|                                                                      | 552          | 1.432713086 | 2.705508121 | 1.005846755    |             |
| 3.583211148                                                          | 5.224729926  |             | 6.081723193 |                |             |
| ENSG00000142892                                                      | 1292.326192  |             | 935.2937011 | 1232.026004    |             |
| 754.4382447                                                          | 572.9901431  |             | 562.2364927 | 1153.215299    |             |
| 629.8882935                                                          | 0.872304089  |             | 6.28E-06    | 0.000164514    | PIGK        |
|                                                                      | 1            | 77088990    | 77219430    | -              | 5513        |
| protein_coding phosphatidylinositol glycan anchor biosynthesis class |              |             |             |                |             |
| K [Source:HGNC Symbol;Acc:HGNC:8965]                                 |              |             |             |                |             |
|                                                                      | 751          | 627         | 573         | 11.08051366    | 8.069323593 |
| 10.58729486                                                          | 6.586476718  |             | 4.956078152 | 4.851909206    |             |
| ENSG00000163755                                                      | 1104.8984    |             | 1087.313688 | 1334.694838    |             |
| 532.4264577                                                          | 620.5108568  |             | 792.8221397 | 1175.635642    |             |
| 648.5864847                                                          | 0.858144586  |             | 6.37E-06    | 0.000166539    | HPS3        |
|                                                                      | 3            | 149129584   | 149173732   | +              | 6256        |
| protein_coding "HPS3, biogenesis of lysosomal organelles complex 2   |              |             |             |                |             |
| subunit 1 [Source:HGNC Symbol;Acc:HGNC:15597]"                       |              |             |             |                |             |
|                                                                      | 1365         | 530         | 679         | 808            | 8.348363378 |
|                                                                      | 10.10737472  |             | 4.096192387 | 4.729678624    | 6.029213412 |
| ENSG00000148840                                                      | 2249.133498  |             | 2581.558927 | 2547.164874    |             |
| 4271.4666                                                            | 3279.8431    |             | 4039.664294 | 2459.285766    |             |
| 3863.657998                                                          | -0.651393328 |             | 6.66E-06    | 0.000173619    | PPRC1       |
|                                                                      | 10           | 102132994   | 102150331   | +              | 6095        |

|                      |                                                                                                               |              |             |             |             |             |             |
|----------------------|---------------------------------------------------------------------------------------------------------------|--------------|-------------|-------------|-------------|-------------|-------------|
| protein_coding       | "peroxisome proliferator-activated receptor gamma, coactivator-related 1 [Source:HGNC Symbol;Acc:HGNC:30025]" |              |             |             |             |             | -           |
|                      | 1944                                                                                                          | 2785         | 2605        | 4252        | 3589        | 4117        | 17.44284266 |
|                      | 20.14584311                                                                                                   |              | 19.79869081 |             | 33.73034338 |             | 25.66010009 |
|                      | 31.53212161                                                                                                   |              |             |             |             |             |             |
| ENSG00000078053      | 443.1163218                                                                                                   |              |             | 363.3648472 |             | 400.8973506 |             |
|                      | 108.494448                                                                                                    | 233.9481286  |             | 136.3889572 |             | 402.4595065 |             |
|                      | 159.6105113                                                                                                   | 1.332034825  |             | 6.76E-06    |             | 0.000176111 | AMPH        |
|                      | 7                                                                                                             | 38383704     |             | 38631567    |             | -           | 5636        |
| protein_coding       | amphiphysin [Source:HGNC Symbol;Acc:HGNC:471]                                                                 |              |             |             |             |             | -           |
|                      | 383                                                                                                           | 392          | 410         | 108         | 256         | 139         | 3.716400435 |
|                      | 3.066542871                                                                                                   |              | 3.369886921 |             | 0.92651827  |             | 1.979372712 |
|                      | 1.151303571                                                                                                   |              |             |             |             |             |             |
| ENSG00000119397      | 521.7897157                                                                                                   |              |             | 482.0145932 |             | 679.5698992 |             |
|                      | 314.4329835                                                                                                   | 198.3075934  |             | 278.6652075 |             | 561.1247361 |             |
|                      | 263.8019281                                                                                                   | 1.089871221  |             | 6.93E-06    |             | 0.000180258 | CNTRL       |
|                      | 9                                                                                                             | 121074863    |             | 121177610   |             | +           | 9417        |
| protein_coding       | centriolin [Source:HGNC Symbol;Acc:HGNC:1858]                                                                 |              |             |             |             |             | -           |
|                      | 451                                                                                                           | 520          | 695         | 313         | 217         | 284         | 2.619139825 |
|                      | 2.434583819                                                                                                   |              | 3.41880783  |             | 1.607063301 |             | 1.004166575 |
|                      | 1.407835154                                                                                                   |              |             |             |             |             |             |
| ENSG00000177352      | 849.20987                                                                                                     |              |             | 909.3390692 |             | 889.7965587 |             |
|                      | 1345.130239                                                                                                   | 1400.033332  |             | 1423.743719 |             | 882.7818326 |             |
|                      | 1389.635763                                                                                                   | -0.654314879 |             | 6.98E-06    |             | 0.000181122 | CCDC71      |
|                      | 3                                                                                                             | 49162535     |             | 49166321    |             | -           | 1781        |
| protein_coding       | coiled-coil domain containing 71 [Source:HGNC Symbol;Acc:HGNC:25760]                                          |              |             |             |             |             | -           |
|                      | 1451                                                                                                          | 22.5385957   |             | 734         | 981         | 910         | 1339        |
|                      | 36.35112651                                                                                                   | 37.48464857  |             | 38.03203191 |             | 23.66900104 | 1532        |
| ENSG00000143479      | 795.9896329                                                                                                   |              |             | 578.4175119 |             | 440.0092873 |             |
|                      | 1245.676995                                                                                                   | 1186.190121  |             | 1062.656408 |             | 604.8054774 |             |
|                      | 1164.841175                                                                                                   | -0.947023312 |             | 7.03E-06    |             | 0.000182104 | DYRK3       |
|                      | 1                                                                                                             | 206635536    |             | 206684419   |             | +           | 4336        |
| protein_coding       | dual specificity tyrosine phosphorylation regulated kinase 3 [Source:HGNC Symbol;Acc:HGNC:3094]               |              |             |             |             |             | -           |
|                      | 450                                                                                                           | 1240         | 1298        | 1083        | 8.677485116 |             | 688         |
|                      | 4.807570881                                                                                                   |              | 13.82718037 |             | 13.04499799 |             | 624         |
|                      | 11.65964208                                                                                                   |              |             |             |             |             |             |
| ENSG00000231991      | 1939.067768                                                                                                   |              |             | 1402.477076 |             | 1217.359028 |             |
|                      | 824.7587203                                                                                                   | 853.5451255  |             | 874.2630278 |             | 1519.634624 |             |
|                      | 850.8556245                                                                                                   | 0.836035414  |             | 7.08E-06    |             | 0.000183066 |             |
| ANXA2P2              | 9                                                                                                             | 33624274     |             | 33625293    |             | +           | 1020        |
| processed_pseudogene | annexin A2 pseudogene 2 [Source:HGNC Symbol;Acc:HGNC:539]                                                     |              |             |             |             |             | -           |
|                      | 891                                                                                                           | 89.860443    |             | 1676        | 1513        | 1245        | 821         |
|                      | 38.91743438                                                                                                   | 39.9029774   |             | 65.39924193 |             | 56.54206109 | 934         |
| ENSG00000079819      | 2305.82462                                                                                                    |              |             | 40.77777903 |             | 2417.117685 |             |
|                      | 1571.160339                                                                                                   | 1410.085791  |             | 2398.022601 |             | 2373.654969 |             |
|                      | 1551.079125                                                                                                   | 0.614069883  |             | 1671.991245 |             | 2373.654969 |             |
|                      | 7.17E-06                                                                                                      |              |             | 0.000185165 |             |             |             |
| EPB41L2              | 6                                                                                                             | 130839347    |             | 131063322   |             | -           | 10320       |
| protein_coding       | erythrocyte membrane protein band 4.1 like 2                                                                  |              |             |             |             |             |             |

|                                    |                                                        |             |             |             |
|------------------------------------|--------------------------------------------------------|-------------|-------------|-------------|
| [Source:HGNC Symbol;Acc:HGNC:3379] | -                                                      | 1993        | 2587        | 2472        |
| 1564                               | 1543                                                   | 1704        | 10.56142001 | 11.05224973 |
| 11.09612205                        | 7.327541182                                            | 6.515456154 | 7.707897468 |             |
| ENSG00000165119                    | 13191.67703                                            | 14212.94184 | 15546.99482 |             |
| 9247.142534                        | 10057.94181                                            | 10227.20936 | 14317.20456 |             |
| 9844.097901                        | 0.540449466                                            | 7.21E-06    | 0.000185909 | HNRNPK      |
| 9                                  | 83968083                                               | 83980616    | -           | 5114        |
| protein_coding                     | heterogeneous nuclear ribonucleoprotein K [Source:HGNC |             |             |             |
| Symbol;Acc:HGNC:5044]              | -                                                      | 11402       | 15333       | 15900       |
| 10423                              | 121.9312499                                            | 132.190538  | 144.0253225 | 9205        |
| 87.02905858                        | 93.78370427                                            | 95.14326479 |             | 11006       |
| ENSG00000164604                    | 313.5366141                                            | 343.8988733 | 439.0314889 |             |
| 182.8332364                        | 170.8917971                                            | 135.4077417 | 365.4889921 |             |
| 163.0442584                        | 1.165161426                                            | 7.25E-06    | 0.000186509 | GPR85       |
| 7                                  | 113078331                                              | 113087778   | -           | 7396        |
| protein_coding                     | G protein-coupled receptor 85 [Source:HGNC             |             |             |             |
| Symbol;Acc:HGNC:4536]              | -                                                      | 271         | 371         | 449         |
| 138                                | 2.003858731                                            | 2.211622324 | 2.812236848 | 182         |
| 1.18980476                         | 1.101801354                                            | 0.871020186 |             | 187         |
| ENSG00000205426                    | 107.5974358                                            | 138.11572   | 135.9139798 |             |
| 39.17855066                        | 36.5543951                                             | 14.71823279 | 127.2090452 |             |
| 30.15039285                        | 2.077078965                                            | 7.29E-06    | 0.000187355 | KRT81       |
| 12                                 | 52285913                                               | 52291534    | -           | 1929        |
| protein_coding                     | keratin 81 [Source:HGNC Symbol;Acc:HGNC:6458]          |             |             |             |
| 93                                 | 149                                                    | 139         | 39          | 40          |
| 3.405555786                        | 3.337989978                                            | 0.977537881 | 0.903621096 | 2.6366072   |
| 0.362998698                        |                                                        |             |             |             |
| ENSG00000144354                    | 1064.404742                                            | 1332.955741 | 1316.116668 |             |
| 852.8869105                        | 597.6643598                                            | 603.4475445 | 1237.825717 |             |
| 684.6662716                        | 0.855148011                                            | 7.33E-06    | 0.000187944 | CDCA7       |
| 2                                  | 173354820                                              | 173368997   | +           | 3934        |
| protein_coding                     | cell division cycle associated 7 [Source:HGNC          |             |             |             |
| Symbol;Acc:HGNC:14628]             | -                                                      | 920         | 1438        | 1346        |
| 615                                | 12.78934151                                            | 16.11604563 | 15.84941219 | 849         |
| 10.43456986                        | 7.244392804                                            | 7.297713274 |             | 654         |
| ENSG00000168077                    | 263.7872621                                            | 219.6874204 | 404.8085443 |             |
| 141.6455293                        | 89.55826799                                            | 90.27182779 | 296.0944089 |             |
| 107.1585417                        | 1.467489075                                            | 7.42E-06    | 0.000189935 | SCARA3      |
| 8                                  | 27633868                                               | 27676776    | +           | 4031        |
| protein_coding                     | scavenger receptor class A member 3 [Source:HGNC       |             |             |             |
| Symbol;Acc:HGNC:19000]             | -                                                      | 228         | 237         | 414         |
| 92                                 | 3.093262393                                            | 2.592205966 | 4.757622712 | 141         |
| 1.691248915                        | 1.059429045                                            | 1.06542054  |             | 98          |
| ENSG00000137710                    | 4181.259496                                            | 3261.014114 | 3257.046524 |             |
| 2083.495232                        | 2485.698867                                            | 2141.012263 | 3566.440045 |             |
| 2236.735454                        | 0.672676916                                            | 7.54E-06    | 0.000192793 | RDX         |
| 11                                 | 109864295                                              | 110296722   | -           | 8528        |
| protein_coding                     | radixin [Source:HGNC Symbol;Acc:HGNC:9944]             |             |             |             |
| 3614                               | 3518                                                   | 3331        | 2074        | 2720        |
| 18.18790183                        | 18.09380464                                            | 11.75879386 | 2182        | 23.17584989 |
|                                    |                                                        |             |             | 13.89889615 |



|                                                                     |                                                |             |             |        |  |  |
|---------------------------------------------------------------------|------------------------------------------------|-------------|-------------|--------|--|--|
|                                                                     | 11.94410439                                    |             |             |        |  |  |
| ENSG0000059588                                                      | 802.9314029                                    | 763.8077401 | 837.9732427 |        |  |  |
| 404.8450235                                                         | 473.3794165                                    | 499.4386994 | 801.5707952 |        |  |  |
| 459.2210465                                                         | 0.803355417                                    | 7.65E-06    | 0.000195314 | TARBP1 |  |  |
| 1                                                                   | 234391313                                      | 234479103   | - 7743      |        |  |  |
| protein_coding                                                      | TAR (HIV-1) RNA binding protein 1 [Source:HGNC |             |             |        |  |  |
| Symbol;Acc:HGNC:11568]                                              | -                                              | 694 824     | 857 403     | 518    |  |  |
| 509                                                                 | 4.901679644                                    | 4.691934173 | 5.127126331 |        |  |  |
| 2.516500398                                                         | 2.915272113                                    | 3.068700887 |             |        |  |  |
| ENSG00000134291                                                     | 1826.842486                                    | 1878.003011 | 1926.26288  |        |  |  |
| 1100.013153                                                         | 1354.340338                                    | 982.196735  | 1877.036126 |        |  |  |
| 1145.516742                                                         | 0.7122242                                      | 7.67E-06    | 0.000195314 |        |  |  |
| TMEM106C                                                            | 12 47963569                                    | 47968878    | +           | 3475   |  |  |
| protein_coding                                                      | transmembrane protein 106C [Source:HGNC        |             |             |        |  |  |
| Symbol;Acc:HGNC:28775]                                              | -                                              | 1579 2026   | 1970 1095   | 1482   |  |  |
| 1001                                                                | 24.84975057                                    | 25.70505811 | 26.26115802 |        |  |  |
| 15.23563384                                                         | 18.58454755                                    | 13.44699689 |             |        |  |  |
| ENSG0000060762                                                      | 387.5821614                                    | 367.9996029 | 372.5411966 |        |  |  |
| 175.8011889                                                         | 207.4461922                                    | 149.144759  | 376.0409869 |        |  |  |
| 177.4640467                                                         | 1.082432715                                    | 7.68E-06    | 0.000195314 | MPC1   |  |  |
| 6                                                                   | 166364919                                      | 166383013   | - 1546      |        |  |  |
| protein_coding                                                      | mitochondrial pyruvate carrier 1 [Source:HGNC  |             |             |        |  |  |
| Symbol;Acc:HGNC:21606]                                              | -                                              | 335 397     | 381 175     | 227    |  |  |
| 152                                                                 | 11.8503187                                     | 11.32178687 | 11.41610467 |        |  |  |
| 5.473054535                                                         | 6.398452723                                    | 4.589655982 |             |        |  |  |
| ENSG00000146410                                                     | 260.316377                                     | 253.9846126 | 267.916766  |        |  |  |
| 108.494448                                                          | 121.5433637                                    | 107.9337071 | 260.7392519 |        |  |  |
| 112.6571729                                                         | 1.210150171                                    | 7.78E-06    | 0.000197517 | MTRF2  |  |  |
| 6                                                                   | 136231024                                      | 136250335   | - 2450      |        |  |  |
| protein_coding                                                      | mitochondrial fission regulator 2 [Source:HGNC |             |             |        |  |  |
| Symbol;Acc:HGNC:21115]                                              | -                                              | 225 274     | 274 108     | 133    |  |  |
| 110                                                                 | 5.022398244                                    | 4.930811911 | 5.180681988 |        |  |  |
| 2.131370191                                                         | 2.365615485                                    | 2.095910033 |             |        |  |  |
| ENSG00000100714                                                     | 2983.804162                                    | 3485.33629  | 3922.927246 |        |  |  |
| 2151.806552                                                         | 1793.906939                                    | 2419.677471 | 3464.022566 |        |  |  |
| 2121.796987                                                         | 0.707489733                                    | 7.85E-06    | 0.00019893  | MTHFD1 |  |  |
| 14                                                                  | 64388031                                       | 64463457    | + 9377      |        |  |  |
| protein_coding                                                      | "methylenetetrahydrofolate dehydrogenase,      |             |             |        |  |  |
| cyclohydrolase and formyltetrahydrofolate synthetase 1 [Source:HGNC |                                                |             |             |        |  |  |
| Symbol;Acc:HGNC:7432]"                                              | -                                              | 2579 3760   | 4012 2142   | 1963   |  |  |
| 2466                                                                | 15.04118798                                    | 17.67900778 | 19.81980896 |        |  |  |
| 11.0447723                                                          | 9.122523301                                    | 12.27651764 |             |        |  |  |
| ENSG00000160888                                                     | 709.2175072                                    | 1142.930757 | 866.3293967 |        |  |  |
| 1665.590692                                                         | 1447.554046                                    | 1759.319426 | 906.1592202 |        |  |  |
| 1624.154721                                                         | -0.840687588                                   | 7.90E-06    | 0.000199984 | IER2   |  |  |
| 19                                                                  | 13150415                                       | 13154908    | + 3072      |        |  |  |
| protein_coding                                                      | immediate early response 2 [Source:HGNC        |             |             |        |  |  |
| Symbol;Acc:HGNC:28871]                                              | -                                              | 613 1233    | 886 1658    | 1584   |  |  |
| 1793                                                                | 10.91274422                                    | 17.69602908 | 13.36026174 |        |  |  |
| 26.09543443                                                         | 22.46945629                                    | 27.24614817 |             |        |  |  |

|                                              |                                                 |             |                  |        |  |
|----------------------------------------------|-------------------------------------------------|-------------|------------------|--------|--|
| ENSG00000170759                              | 6209.413314                                     | 5744.31622  | 5907.85803       |        |  |
| 4167.995043                                  | 4311.590902                                     | 3759.036655 | 5953.862521      |        |  |
| 4079.540867                                  | 0.545311177                                     | 7.97E-06    | 0.000201135      | KIF5B  |  |
| 10                                           | 32009010                                        | 32056431    | - 5877           |        |  |
| protein_coding                               | kinesin family member 5B [Source:HGNC           |             |                  |        |  |
| Symbol;Acc:HGNC:6324]                        | -                                               | 5367 6197   | 6042 4149        | 4718   |  |
| 3831                                         | 49.94253899                                     | 46.49002325 | 47.62417726      |        |  |
| 34.13413962                                  | 34.98330557                                     | 30.43003817 |                  |        |  |
| ENSG00000186193                              | 426.9188583                                     | 662.7700657 | 1169.446906      |        |  |
| 293.3368408                                  | 227.5511095                                     | 362.0685267 | 753.0452766      |        |  |
| 294.3188257                                  | 1.356420112                                     | 7.97E-06    | 0.000201135      | SAPCD2 |  |
| 9                                            | 137062124                                       | 137070588   | - 3848           |        |  |
| protein_coding                               | suppressor APC domain containing 2 [Source:HGNC |             |                  |        |  |
| Symbol;Acc:HGNC:28055]                       | -                                               | 369 715     | 1196 292         | 249    |  |
| 369                                          | 5.244281742                                     | 8.19228281  | 14.39788075      |        |  |
| 3.669010922                                  | 2.819829707                                     | 4.476487114 |                  |        |  |
| ENSG00000161091                              | 1585.037496                                     | 1915.081057 | 1985.908583      |        |  |
| 2947.432503                                  | 2692.231199                                     | 2865.149317 | 1828.675712      |        |  |
| 2834.937673                                  | -0.631993484                                    | 8.04E-06    | 0.000202375      | MFSD12 |  |
| 19                                           | 3538261 3574290                                 | - 5277      | protein_coding   | major  |  |
| facilitator superfamily domain containing 12 | [Source:HGNC                                    |             |                  |        |  |
| Symbol;Acc:HGNC:28299]                       | -                                               | 1370 2066   | 2031 2934        | 2946   |  |
| 2920                                         | 14.19803315                                     | 17.26144628 | 17.82893021      |        |  |
| 26.88278334                                  | 24.32787894                                     | 25.83103412 |                  |        |  |
| ENSG0000018510                               | 3114.540831                                     | 2764.168302 | 3120.154746      |        |  |
| 2052.353308                                  | 2053.443145                                     | 1897.670815 | 2999.621293      |        |  |
| 2001.155756                                  | 0.583783081                                     | 8.51E-06    | 0.000213968      | AGPS   |  |
| 2                                            | 177392644                                       | 177559299   | + 8965           |        |  |
| protein_coding                               | alkylglycerone phosphate synthase [Source:HGNC  |             |                  |        |  |
| Symbol;Acc:HGNC:327]                         | -                                               | 2692 2982   | 3191 2043        | 2247   |  |
| 1934                                         | 16.42175144                                     | 14.66531187 | 16.48841714      |        |  |
| 11.01841915                                  | 10.92223147                                     | 10.07052731 |                  |        |  |
| ENSG00000137809                              | 217.508795                                      | 154.8008405 | 380.3635839      |        |  |
| 96.43950931                                  | 78.59194946                                     | 64.76022428 | 250.8910731      |        |  |
| 79.93056102                                  | 1.650670892                                     | 8.58E-06    | 0.000214905      | ITGA11 |  |
| 15                                           | 68296533                                        | 68432162    | - 10864          |        |  |
| protein_coding                               | integrin subunit alpha 11 [Source:HGNC          |             |                  |        |  |
| Symbol;Acc:HGNC:6136]                        | -                                               | 188 167     | 389 96           | 86     |  |
| 66                                           | 0.94637401                                      | 0.677736183 | 1.658678824      |        |  |
| 0.427250611                                  | 0.344958851                                     | 0.283596074 |                  |        |  |
| ENSG00000166147                              | 2982.6472                                       | 1454.38634  | 2948.062225      |        |  |
| 1364.217226                                  | 964.1221707                                     | 1292.260839 | 2461.698588      |        |  |
| 1206.866745                                  | 1.028258775                                     | 8.58E-06    | 0.000214905      | FBN1   |  |
| 15                                           | 48408306                                        | 48645849    | - 16057          |        |  |
| protein_coding                               | fibrillin 1 [Source:HGNC Symbol;Acc:HGNC:3603]  |             |                  |        |  |
| 2578                                         | 1569 3015                                       | 1358 1055   | 1317 8.780378111 | -      |  |
| 4.308166647                                  | 8.698119399                                     | 4.089183305 | 2.863166803      |        |  |
| 3.828841631                                  |                                                 |             |                  |        |  |
| ENSG00000134779                              | 2488.624564                                     | 2143.111038 | 2384.850337      |        |  |
| 1630.430454                                  | 1459.434224                                     | 1485.560296 | 2338.86198       |        |  |

|                        |                                                        |             |             |           |
|------------------------|--------------------------------------------------------|-------------|-------------|-----------|
| 1525.141658            | 0.616730581                                            | 8.72E-06    | 0.000218068 | TPGS2     |
| 18                     | 36777647                                               | 36829216    | - 10571     |           |
| protein_coding         | tubulin polyglutamylase complex subunit 2 [Source:HGNC |             |             |           |
| Symbol;Acc:HGNC:24561] | -                                                      | 2151 2312   | 2439 1623   | 1597      |
| 1514                   | 11.12804954                                            | 9.642856745 | 10.68804278 |           |
| 7.42341369             | 6.583357524                                            | 6.685837829 |             |           |
| ENSG00000111581        | 2414.579017                                            | 2425.831136 | 2551.076068 |           |
| 1771.071405            | 1488.67774                                             | 1593.494004 | 2463.82874  |           |
| 1617.747716            | 0.607122455                                            | 8.88E-06    | 0.00022185  | NUP107    |
| 12                     | 68686734                                               | 68745809    | + 8320      |           |
| protein_coding         | nucleoporin 107 [Source:HGNC                           |             |             |           |
| Symbol;Acc:HGNC:29914] | -                                                      | 2087 2617   | 2609 1763   | 1629 1624 |
| 13.71809593            | 13.86801665                                            | 14.52623978 | 10.24543028 |           |
| 8.532108228            | 9.111895585                                            |             |             |           |
| ENSG00000100934        | 2293.098041                                            | 1930.839226 | 2164.845693 |           |
| 1332.070722            | 1467.658963                                            | 1319.734874 | 2129.59432  |           |
| 1373.154853            | 0.632669413                                            | 8.90E-06    | 0.000221957 | SEC23A    |
| 14                     | 39031919                                               | 39109646    | - 8945      |           |
| protein_coding         | "Sec23 homolog A, coat complex II component            |             |             |           |
| [Source:HGNC           | Symbol;Acc:HGNC:10701]"                                | -           | 1982 2083   | 2214      |
| 1326                   | 1606 1345                                              | 12.11763922 | 10.26698395 |           |
| 11.46567764            | 7.167445439                                            | 7.823909059 | 7.019205789 |           |
| ENSG00000091483        | 2827.614335                                            | 2731.725012 | 3085.931801 |           |
| 1845.410194            | 2041.562966                                            | 1871.177996 | 2881.75705  |           |
| 1919.383719            | 0.586211892                                            | 9.03E-06    | 0.000224799 | FH        |
| 1                      | 241497603                                              | 241519761   | - 2142      |           |
| protein_coding         | fumarate hydratase [Source:HGNC                        |             |             |           |
| Symbol;Acc:HGNC:3700]  | -                                                      | 2444 2947   | 3156 1837   | 2234 1907 |
| 62.39883018            | 60.65891353                                            | 68.25272319 | 41.46588189 |           |
| 45.44878735            | 41.56016493                                            |             |             |           |
| ENSG00000068308        | 1279.599613                                            | 1369.106835 | 1372.828976 |           |
| 2305.50702             | 1914.536443                                            | 2020.322755 | 1340.511808 |           |
| 2080.122072            | -0.633536763                                           | 9.16E-06    | 0.000227122 | OTUD5     |
| X                      | 48922028                                               | 48958386    | - 3592      |           |
| protein_coding         | OTU deubiquitinase 5 [Source:HGNC                      |             |             |           |
| Symbol;Acc:HGNC:25402] | -                                                      | 1106 1477   | 1404 2295   | 2095      |
| 2059                   | 16.83889201                                            | 18.12917851 | 18.10644691 |           |
| 30.89211041            | 25.41594705                                            | 26.75876432 |             |           |
| ENSG00000100626        | 136.5214777                                            | 145.5313291 | 200.4486753 |           |
| 65.29758443            | 27.41579632                                            | 14.71823279 | 160.8338274 |           |
| 35.81053785            | 2.170096108                                            | 9.16E-06    | 0.000227122 |           |
| GALNT16                | 14 69259277                                            | 69357033    | + 10802     |           |
| protein_coding         | polypeptide N-acetylgalactosaminyltransferase 16       |             |             |           |
| [Source:HGNC           | Symbol;Acc:HGNC:23233]                                 | -           | 118 157     | 205       |
| 65                     | 30 15                                                  | 0.597410081 | 0.640810232 |           |
| 0.879128064            | 0.290944666                                            | 0.121025164 | 0.064823596 |           |
| ENSG00000164919        | 1336.290735                                            | 1432.139513 | 1399.229534 |           |
| 611.7881372            | 922.0846163                                            | 859.5447951 | 1389.219927 |           |
| 797.8058495            | 0.799884442                                            | 9.17E-06    | 0.000227122 | COX6C     |
| 8                      | 99873200                                               | 99894062    | - 3066      |           |

|                                 |                                                 |             |                |       |       |       |
|---------------------------------|-------------------------------------------------|-------------|----------------|-------|-------|-------|
| protein_coding                  | cytochrome c oxidase subunit 6C [Source:HGNC    |             |                |       |       |       |
| Symbol;Acc:HGNC:2285]           | -                                               | 1155        | 1545           | 1431  | 609   | 1009  |
| 876                             | 20.60177057                                     | 22.21724945 | 21.62070937    |       |       |       |
| 9.603871899                     | 14.34093982                                     | 13.3376093  |                |       |       |       |
| ENSG00000123700                 | 18.51138681                                     | 41.71280134 | 55.73450972    |       |       | 0     |
| 0                               | 1.962431039                                     | 38.65289929 | 0.65414368     |       |       |       |
| 5.904443926                     | 9.41E-06                                        | 0.000232857 | KCNJ2          | 17    |       |       |
| 70168673                        | 70180048                                        | + 5577      | protein_coding |       |       |       |
| potassium voltage-gated channel | subfamily J member 2 [Source:HGNC               |             |                |       |       |       |
| Symbol;Acc:HGNC:6263]           | -                                               | 16          | 45             | 57    | 0     | 0     |
| 2                               | 0.156896787                                     | 0.355750752 | 0.473452776    |       |       | 0     |
| 0                               | 0.016740768                                     |             |                |       |       |       |
| ENSG00000063177                 | 14027.00336                                     | 16830.65186 | 15635.97447    |       |       |       |
| 21268.93012                     | 22009.40129                                     | 25804.00573 | 15497.87656    |       |       |       |
| 23027.44571                     | -0.571226629                                    | 9.52E-06    | 0.000235024    |       |       | RPL18 |
| 19                              | 48615328                                        | 48619536    | -              | 4209  |       |       |
| protein_coding                  | ribosomal protein L18 [Source:HGNC              |             |                |       |       |       |
| Symbol;Acc:HGNC:10310]          | -                                               | 12124       | 18157          | 15991 | 21172 | 24084 |
| 26298                           | 157.5294348                                     | 190.1950132 | 175.9945233    |       |       |       |
| 243.2115391                     | 249.3493788                                     | 291.6687035 |                |       |       |       |
| ENSG00000102189                 | 1499.422332                                     | 1300.512451 | 1290.693909    |       |       |       |
| 908.1387127                     | 770.3838767                                     | 844.8265623 | 1363.542897    |       |       |       |
| 841.1163839                     | 0.696818511                                     | 9.53E-06    | 0.000235024    |       |       | EEA1  |
| 12                              | 92770637                                        | 92929331    | -              | 10150 |       |       |
| protein_coding                  | early endosome antigen 1 [Source:HGNC           |             |                |       |       |       |
| Symbol;Acc:HGNC:3185]           | -                                               | 1296        | 1403           | 1320  | 904   | 843   |
| 861                             | 6.98286542                                      | 6.094324664 | 6.024352072    |       |       |       |
| 4.306293286                     | 3.619262893                                     | 3.95989021  |                |       |       |       |
| ENSG00000181830                 | 854.9946784                                     | 868.553219  | 990.5097956    |       |       |       |
| 1405.404933                     | 1517.007397                                     | 1391.363607 | 904.6858976    |       |       |       |
| 1437.925312                     | -0.668340798                                    | 9.59E-06    | 0.000235967    |       |       |       |
| SLC35C1                         | 11 45804072                                     | 45813015    | + 4505         |       |       |       |
| protein_coding                  | solute carrier family 35 member C1 [Source:HGNC |             |                |       |       |       |
| Symbol;Acc:HGNC:20197]          | -                                               | 739         | 937            | 1013  | 1399  | 1660  |
| 1418                            | 8.97107228                                      | 9.170198858 | 10.41638698    |       |       |       |
| 15.01495848                     | 16.05727667                                     | 14.69357491 |                |       |       |       |
| ENSG00000163156                 | 1196.298373                                     | 1160.542828 | 1111.756799    |       |       |       |
| 1839.382725                     | 1757.352544                                     | 1707.315004 | 1156.199333    |       |       |       |
| 1768.016758                     | -0.612892926                                    | 9.68E-06    | 0.000237796    |       |       | SCNM1 |
| 1                               | 151156664                                       | 151170297   | + 3265         |       |       |       |
| protein_coding                  | sodium channel modifier 1 [Source:HGNC          |             |                |       |       |       |
| Symbol;Acc:HGNC:23136]          | -                                               | 1034        | 1252           | 1137  | 1831  | 1923  |
| 1740                            | 17.31936903                                     | 16.9065542  | 16.13168507    |       |       |       |
| 27.11479811                     | 25.66579354                                     | 24.87780724 |                |       |       |       |
| ENSG00000104067                 | 1372.156547                                     | 918.6085806 | 1291.671708    |       |       |       |
| 724.3008981                     | 599.4920796                                     | 675.0762774 | 1194.145612    |       |       |       |
| 666.2897517                     | 0.841397336                                     | 9.74E-06    | 0.000239009    |       |       | TJP1  |
| 15                              | 29699367                                        | 29968865    | -              | 11265 |       |       |
| protein_coding                  | tight junction protein 1 [Source:HGNC           |             |                |       |       |       |
| Symbol;Acc:HGNC:11827]          | -                                               | 1186        | 991            | 1321  | 721   | 656   |

|                               |                                                        |             |                  |        |
|-------------------------------|--------------------------------------------------------|-------------|------------------|--------|
| 688                           | 5.757689038                                            | 3.878612711 | 5.432179063      |        |
| 3.094605444                   | 2.537647185                                            | 2.851039787 |                  |        |
| ENSG00000116774               | 196.6834849                                            | 167.7781565 | 259.1165803      |        |
| 87.39830532                   | 45.69299387                                            | 74.57237948 | 207.8594072      |        |
| 69.22122622                   | 1.588390627                                            | 9.82E-06    | 0.000240617      | OLFML3 |
| 1                             | 113979391                                              | 114035572   | + 2821           |        |
| protein_coding                | olfactomedin like 3 [Source:HGNC                       |             |                  |        |
| Symbol;Acc:HGNC:24956]        | -                                                      | 170 181     | 265 87           | 50     |
| 76                            | 3.295645939                                            | 2.82884692  | 4.351562681      |        |
| 1.491136438                   | 0.772370212                                            | 1.257640579 |                  |        |
| ENSG00000135829               | 9141.1542                                              | 9175.889343 | 9425.976732      |        |
| 6941.635514                   | 6161.243294                                            | 6362.201428 | 9247.673425      |        |
| 6488.360079                   | 0.511284061                                            | 9.84E-06    | 0.000240728      | DHX9   |
| 1                             | 182839369                                              | 182887751   | + 5645           |        |
| protein_coding                | DExH-box helicase 9 [Source:HGNC Symbol;Acc:HGNC:2750] |             |                  |        |
| -                             | 7901 9899                                              | 9640 6910   | 6742 6484        |        |
| 76.54429515                   | 77.31456842                                            | 79.10711448 | 59.18549955      |        |
| 52.04552571                   | 53.61978839                                            |             |                  |        |
| ENSG00000130592               | 468.5694787                                            | 309.601681  | 716.726239       |        |
| 259.1811813                   | 110.5770452                                            | 162.8817762 | 498.2991329      |        |
| 177.5466676                   | 1.489882442                                            | 9.89E-06    | 0.000241409      | LSP1   |
| 11                            | 1852970 1892267                                        | + 5399      | protein_coding   |        |
| lymphocyte specific protein 1 | [Source:HGNC Symbol;Acc:HGNC:6707]                     |             |                  |        |
| -                             | 405 334                                                | 733 258     | 121 166          |        |
| 4.102384933                   | 2.727514684                                            | 6.289166653 | 2.31050863       |        |
| 0.976631304                   | 1.435293759                                            |             |                  |        |
| ENSG0000011275                | 3475.512874                                            | 4135.129039 | 3628.609922      |        |
| 5575.409132                   | 5451.174169                                            | 5452.614642 | 3746.417279      |        |
| 5493.065981                   | -0.551886508                                           | 1.00E-05    | 0.000244995      | RNF216 |
| 7                             | 5620047 5781739                                        | - 7619      | protein_coding   | ring   |
| finger protein 216            | [Source:HGNC Symbol;Acc:HGNC:21698] - 3004             |             |                  |        |
| 4461                          | 3711 5550                                              | 5965 5557   | 21.56237861      |        |
| 25.81476689                   | 22.56292691                                            | 35.2205575  | 34.11701859      |        |
| 34.04775326                   |                                                        |             |                  |        |
| ENSG00000128245               | 1816.429831                                            | 1839.071063 | 1911.595904      |        |
| 1056.81629                    | 1281.231548                                            | 1231.425477 | 1855.698933      |        |
| 1189.824438                   | 0.641065717                                            | 1.02E-05    | 0.000248401      | YWHAH  |
| 22                            | 31944461                                               | 31957603    | + 2453           |        |
| protein_coding                | tyrosine 3-monooxygenase/tryptophan 5-monooxygenase    |             |                  |        |
| activation protein eta        | [Source:HGNC Symbol;Acc:HGNC:12853] -                  |             |                  |        |
| 1570                          | 1984 1955                                              | 1052 1402   | 1255 35.00231887 |        |
| 35.65973222                   | 36.91914794                                            | 20.73573376 | 24.9062913       |        |
| 23.88318339                   |                                                        |             |                  |        |
| ENSG00000228672               | 68.26073887                                            | 171.4859611 | 158.4033434      |        |
| 455.0739346                   | 312.5400781                                            | 332.6320611 | 132.7166811      |        |
| 366.7486913                   | -1.461697878                                           | 1.02E-05    | 0.000248409      | PROB1  |
| 5                             | 139390592                                              | 139395713   | - 5122           |        |
| protein_coding                | proline rich basic protein 1 [Source:HGNC              |             |                  |        |
| Symbol;Acc:HGNC:41906]        | -                                                      | 59 185      | 162 453          | 342    |
| 339                           | 0.629951552                                            | 1.592451126 | 1.465135854      |        |

|                                     |                                                    |             |             |                |             |      |
|-------------------------------------|----------------------------------------------------|-------------|-------------|----------------|-------------|------|
| 4.27621807                          | 2.909679335                                        | 3.08962777  |             |                |             |      |
| ENSG00000162521                     | 6015.043752                                        | 5431.933685 | 5343.668344 |                |             |      |
| 3332.185962                         | 4160.804022                                        | 3680.539414 | 5596.881927 |                |             |      |
| 3724.509799                         | 0.58736836                                         | 1.05E-05    | 0.000253653 | RBBP4          |             |      |
| 1                                   | 32651142                                           | 32686211    | + 9470      |                |             |      |
| protein_coding                      | "RB binding protein 4, chromatin remodeling factor |             |             |                |             |      |
| [Source:HGNC Symbol;Acc:HGNC:9887]" | -                                                  | 5199        | 5860        | 5465           |             |      |
| 3317                                | 4553                                               | 3751        | 30.02372345 | 27.28233862    |             |      |
| 26.73268882                         | 16.93544875                                        | 20.95107295 | 18.49026438 |                |             |      |
| ENSG00000152078                     | 244.1189136                                        | 222.4682738 | 239.560612  |                |             |      |
| 40.18312888                         | 111.490905                                         | 78.49724156 | 235.3825998 |                |             |      |
| 76.72375849                         | 1.614473818                                        | 1.07E-05    | 0.000259936 | TMEM56         |             |      |
| 1                                   | 95117338                                           | 95197607    | + 7402      |                |             |      |
| protein_coding                      | transmembrane protein 56 [Source:HGNC              |             |             |                |             |      |
| Symbol;Acc:HGNC:26477]              | -                                                  | 211         | 240         | 245            | 40          | 122  |
| 80                                  | 1.558935286                                        | 1.429539365 | 1.533272899 |                |             |      |
| 0.261283585                         | 0.718239602                                        | 0.504529938 |             |                |             |      |
| ENSG00000104763                     | 1568.840032                                        | 1449.751584 | 1416.829905 |                |             |      |
| 813.7083598                         | 877.3054823                                        | 1041.069666 | 1478.473841 |                |             |      |
| 910.6945028                         | 0.698853951                                        | 1.07E-05    | 0.000259936 | ASAH1          |             |      |
| 8                                   | 18055992                                           | 18084998    | - 15378     |                |             |      |
| protein_coding                      | N-acylsphingosine amidohydrolase 1 [Source:HGNC    |             |             |                |             |      |
| Symbol;Acc:HGNC:735]                | -                                                  | 1356        | 1564        | 1449           | 810         | 960  |
| 1061                                | 4.822303564                                        | 4.484054166 | 4.364866695 |                |             |      |
| 2.546750375                         | 2.720382511                                        | 3.220783726 |             |                |             |      |
| ENSG00000170275                     | 8209.800051                                        | 7955.094691 | 9263.662195 |                |             |      |
| 5208.738081                         | 5528.852258                                        | 6341.595902 | 8476.185645 |                |             |      |
| 5693.062081                         | 0.574221501                                        | 1.08E-05    | 0.000261577 | CRTAP          |             |      |
| 3                                   | 33113979                                           | 33147773    | + 6695      |                |             |      |
| protein_coding                      | cartilage associated protein [Source:HGNC          |             |             |                |             |      |
| Symbol;Acc:HGNC:2379]               | -                                                  | 7096        | 8582        | 9474           | 5185        | 6050 |
| 6463                                | 57.96391864                                        | 56.51606121 | 65.55189559 |                |             |      |
| 37.44547947                         | 39.37888282                                        | 45.06398674 |             |                |             |      |
| ENSG00000139687                     | 5330.12244                                         | 4559.672662 | 4448.982794 |                |             |      |
| 3201.590794                         | 3384.936986                                        | 3016.256507 | 4779.592632 |                |             |      |
| 3200.928095                         | 0.578164572                                        | 1.09E-05    | 0.000262378 | RB1            |             |      |
| 13                                  | 48303726                                           | 48599436    | + 6452      |                |             |      |
| protein_coding                      | RB transcriptional corepressor 1 [Source:HGNC      |             |             |                |             |      |
| Symbol;Acc:HGNC:9884]               | -                                                  | 4607        | 4919        | 4550           | 3187        | 3704 |
| 3074                                | 39.04977773                                        | 33.6137079  | 32.66777034 |                |             |      |
| 23.88300234                         | 25.01699934                                        | 22.241063   |             |                |             |      |
| ENSG00000170801                     | 293.8682656                                        | 584.9061699 | 935.7530843 |                |             |      |
| 201.9202226                         | 204.7046125                                        | 268.8530523 | 604.8425066 |                |             |      |
| 225.1592958                         | 1.426675125                                        | 1.12E-05    | 0.000269661 | HTRA3          |             |      |
| 4                                   | 8269765                                            | 8307111     | + 3321      | protein_coding | HtrA        |      |
| serine peptidase 3 [Source:HGNC     | Symbol;Acc:HGNC:30406]                             |             |             |                |             | 254  |
| 631                                 | 957                                                | 201         | 224         | 274            | 4.182727327 |      |
| 8.377114309                         | 13.34890118                                        | 2.926364356 | 2.939258214 |                |             |      |
| 3.851480675                         |                                                    |             |             |                |             |      |
| ENSG00000143742                     | 6050.909564                                        | 5208.53846  | 5140.286274 |                |             |      |

|                         |                                                      |             |             |        |
|-------------------------|------------------------------------------------------|-------------|-------------|--------|
| 3271.911269             | 4084.039792                                          | 3377.343818 | 5466.578099 |        |
| 3577.76496              | 0.611333243                                          | 1.16E-05    | 0.00027771  | SRP9   |
| 1                       | 225777813                                            | 225790466   | + 1728      |        |
| protein_coding          | signal recognition particle 9 [Source:HGNC           |             |             |        |
| Symbol;Acc:HGNC:11304]  | -                                                    | 5230 5619   | 5257 3257   | 4469   |
| 3442                    | 165.5208331                                          | 143.3670179 | 140.9278073 |        |
| 91.13290975             | 112.7003369                                          | 92.98505744 |             |        |
| ENSG00000112312         | 1183.571794                                          | 1019.646255 | 1039.399716 |        |
| 601.742355              | 727.4324624                                          | 608.3536221 | 1080.872589 |        |
| 645.8428132             | 0.742147216                                          | 1.16E-05    | 0.00027771  | GMNN   |
| 6                       | 24774931                                             | 24786099    | + 2476      |        |
| protein_coding          | "geminin, DNA replication inhibitor [Source:HGNC     |             |             |        |
| Symbol;Acc:HGNC:17493]" | -                                                    | 1023 1100   | 1063 599    | 796    |
| 620                     | 22.59538294                                          | 19.58736439 | 19.8877238  |        |
| 11.69707834             | 14.00944805                                          | 11.68926179 |             |        |
| ENSG00000103264         | 1575.781802                                          | 1651.826933 | 1953.641235 |        |
| 2996.656836             | 2568.860115                                          | 2538.404549 | 1727.083324 |        |
| 2701.307167             | -0.645015286                                         | 1.17E-05    | 0.000280186 | FBX031 |
| 16                      | 87326987                                             | 87392142    | - 6897      |        |
| protein_coding          | F-box protein 31 [Source:HGNC Symbol;Acc:HGNC:16510] |             |             |        |
| -                       | 1362 1782                                            | 1998 2983   | 2811 2587   |        |
| 10.79969758             | 11.39151357                                          | 13.41954261 | 20.91193613 |        |
| 17.76066478             | 17.50984246                                          |             |             |        |
| ENSG00000180340         | 854.9946784                                          | 1254.164894 | 1321.00566  |        |
| 608.7744025             | 498.0536332                                          | 715.3061137 | 1143.388411 |        |
| 607.3780498             | 0.913632086                                          | 1.18E-05    | 0.000281815 | FZD2   |
| 17                      | 44557459                                             | 44559570    | + 2112      |        |
| protein_coding          | frizzled class receptor 2 [Source:HGNC               |             |             |        |
| Symbol;Acc:HGNC:4040]   | -                                                    | 739 1353    | 1351 606    | 545    |
| 729                     | 19.13573893                                          | 28.24475687 | 29.63219964 |        |
| 13.87330476             | 11.2450447                                           | 16.11312033 |             |        |
| ENSG00000105245         | 894.3313753                                          | 1377.449395 | 992.4653924 |        |
| 1965.95958              | 1899.000825                                          | 1743.619978 | 1088.082054 |        |
| 1869.526795             | -0.780015628                                         | 1.19E-05    | 0.000283582 | NUMBL  |
| 19                      | 40665905                                             | 40690972    | - 5823      |        |
| protein_coding          | "NUMB like, endocytic adaptor protein [Source:HGNC   |             |             |        |
| Symbol;Acc:HGNC:8061]"  | -                                                    | 773 1486    | 1015 1957   | 2078   |
| 1777                    | 7.259846138                                          | 11.25138478 | 8.074612838 |        |
| 16.24969643             | 15.55096525                                          | 14.24579444 |             |        |
| ENSG00000165490         | 1286.541383                                          | 998.3263787 | 1118.601388 |        |
| 502.289111              | 770.3838767                                          | 603.4475445 | 1134.489717 |        |
| 625.3735107             | 0.85823188                                           | 1.19E-05    | 0.000284445 | DDIAS  |
| 11                      | 82899975                                             | 82958277    | + 5339      |        |
| protein_coding          | DNA damage induced apoptosis suppressor [Source:HGNC |             |             |        |
| Symbol;Acc:HGNC:26351]  | -                                                    | 1112 1077   | 1144 500    | 843    |
| 615                     | 11.39041583                                          | 8.893848769 | 9.925869463 |        |
| 4.528050898             | 6.880599056                                          | 5.377262413 |             |        |
| ENSG00000180998         | 141.1493244                                          | 88.06035838 | 132.0027862 |        |
| 23.10529911             | 21.93263706                                          | 43.17348286 | 120.4041563 |        |
| 29.40380634             | 2.033768713                                          | 1.19E-05    | 0.000284501 |        |

|                  |      |                                                    |             |             |                                   |                     |
|------------------|------|----------------------------------------------------|-------------|-------------|-----------------------------------|---------------------|
| GPR137C          | 14   | 52553148                                           | 52637713    | +           | 6193                              |                     |
| protein_coding   |      | G protein-coupled receptor 137C [Source:HGNC       |             |             |                                   |                     |
| Symbol;Acc:HGNC: |      | 25445]                                             | -           | 122         | 95                                | 135 23 24           |
|                  | 44   | 1.077341683                                        | 0.676326623 |             | 1.009799484                       |                     |
| 0.179567598      |      | 0.168876321                                        | 0.331663464 |             |                                   |                     |
| ENSG00000138623  |      | 2599.692885                                        | 3121.971442 |             | 2478.718985                       |                     |
| 3593.3763        |      | 4627.786419                                        | 5027.748322 |             | 2733.461104                       |                     |
| 4416.30368       |      | -0.69200111                                        | 1.20E-05    |             | 0.000285821                       | SEMA7A              |
|                  | 15   | 74409289                                           | 74433958    | -           | 3800                              |                     |
| protein_coding   |      | semaphorin 7A (John Milton Hagen blood group)      |             |             |                                   |                     |
| [Source:HGNC     |      | Symbol;Acc:HGNC:10741]                             |             |             | -                                 | 2247 3368 2535      |
|                  | 3577 | 5064                                               | 5124        | 32.33807683 | 39.07711061                       |                     |
| 30.90272825      |      | 45.51311496                                        | 58.07225603 |             | 62.94649611                       |                     |
| ENSG00000138658  |      | 578.4808379                                        | 354.0953358 |             | 599.3904291                       |                     |
| 261.1903377      |      | 168.1502174                                        | 248.2475264 |             | 510.6555343                       |                     |
| 225.8626939      |      | 1.177012354                                        | 1.20E-05    |             | 0.000285821                       | ZGRF1               |
|                  | 4    | 112539333                                          | 112636995   | -           | 9103                              |                     |
| protein_coding   |      | zinc finger GRF-type containing 1 [Source:HGNC     |             |             |                                   |                     |
| Symbol;Acc:HGNC: |      | 25654]                                             |             |             | -                                 | 500 382 613 260 184 |
|                  | 253  | 3.003863365                                        | 1.850174871 |             | 3.119452576                       |                     |
| 1.380988372      |      | 0.880829554                                        | 1.29742426  |             |                                   |                     |
| ENSG00000283041  |      | 2877.363688                                        | 3634.575423 |             | 3765.501701                       |                     |
| 4647.178855      |      | 5673.242119                                        | 5888.274332 |             | 3425.813604                       |                     |
| 5402.898435      |      | -0.657050591                                       | 1.22E-05    |             | 0.000289255                       |                     |
| AC008038.1       |      | 7                                                  | 133034607   | 133035920   | -                                 | 1314                |
|                  |      | processed_pseudogene                               |             |             | eukaryotic translation elongation |                     |
| factor 1 gamma ( |      | -                                                  |             |             | 2487                              | 3921 3851 4626 6208 |
|                  | 6001 | 103.5082897                                        | 131.563505  |             | 135.7627446                       |                     |
| 170.2203502      |      | 205.8803703                                        | 213.1936659 |             |                                   |                     |
| ENSG00000140545  |      | 507.9061756                                        | 587.6870233 |             | 837.9732427                       |                     |
| 309.4100924      |      | 275.985683                                         | 364.0309577 |             | 644.5221472                       |                     |
| 316.4755777      |      | 1.027077338                                        | 1.22E-05    |             | 0.000289812                       | MFGE8               |
|                  | 15   | 88898683                                           | 88913411    | -           | 6837                              |                     |
| protein_coding   |      | milk fat globule-EGF factor 8 protein [Source:HGNC |             |             |                                   |                     |
| Symbol;Acc:HGNC: |      | 7036]                                              |             |             | -                                 | 439 634 857 308 302 |
|                  | 371  | 3.511507926                                        | 4.088440069 |             | 5.806543686                       |                     |
| 2.178142821      |      | 1.924863604                                        | 2.533111844 |             |                                   |                     |
| ENSG00000140391  |      | 4558.429002                                        | 3868.167111 |             | 4011.906902                       |                     |
| 2695.28337       |      | 2985.58022                                         | 2673.812291 |             | 4146.167672                       |                     |
| 2784.89196       |      | 0.573880346                                        | 1.23E-05    |             | 0.000290092                       | TSPAN3              |
|                  | 15   | 77041404                                           | 77083984    | -           | 8506                              |                     |
| protein_coding   |      | tetraspanin 3 [Source:HGNC Symbol;Acc:HGNC:17752]  |             |             |                                   |                     |
|                  | -    | 3940                                               | 4173        | 4103        | 2683                              | 3267 2725           |
| 25.33177117      |      | 21.63002216                                        | 22.34490921 |             | 15.25093643                       |                     |
| 16.73718258      |      | 14.95502571                                        |             |             |                                   |                     |
| ENSG00000071575  |      | 2310.452466                                        | 1924.350568 |             | 2362.360973                       |                     |
| 1417.459871      |      | 1471.314403                                        | 1372.720512 |             | 2199.054669                       |                     |
| 1420.498262      |      | 0.630203949                                        | 1.23E-05    |             | 0.000290163                       | TRIB2               |
|                  | 2    | 12716889                                           | 12742734    | +           | 4588                              |                     |
| protein_coding   |      | tribbles pseudokinase 2 [Source:HGNC               |             |             |                                   |                     |



|                                                  |                                                   |             |             |             |       |                |
|--------------------------------------------------|---------------------------------------------------|-------------|-------------|-------------|-------|----------------|
| Symbol;Acc:HGNC:30809]                           | -                                                 | 1997        | 2076        | 2416        | 1411  | 1610           |
| 1399                                             | 23.80396858                                       | 19.94977022 |             | 24.39360441 |       |                |
| 14.86978951                                      | 15.29188645                                       | 14.23443852 |             |             |       |                |
| ENSG00000165055                                  | 860.7794867                                       | 980.714307  |             | 844.8178316 |       |                |
| 1394.354572                                      | 1550.820212                                       | 1343.284046 |             | 895.4372084 |       |                |
| 1429.486277                                      | -0.674594502                                      | 1.24E-05    |             | 0.000292805 |       |                |
| METTTL2B                                         | 7                                                 | 128476729   | 128506602   | +           | 6749  |                |
| protein_coding                                   | methyltransferase like 2B [Source:HGNC            |             |             |             |       |                |
| Symbol;Acc:HGNC:18272]                           | -                                                 | 744         | 1058        | 864         | 1388  | 1697           |
| 1369                                             | 6.028763121                                       | 6.911625488 |             | 5.930301451 |       |                |
| 9.943774212                                      | 10.9572359                                        | 9.469129496 |             |             |       |                |
| ENSG00000110237                                  | 1283.070498                                       | 1510.003408 |             | 2590.188004 |       |                |
| 961.3813585                                      | 621.4247166                                       | 994.9525367 |             | 1794.420637 |       |                |
| 859.2528706                                      | 1.062913703                                       | 1.25E-05    |             | 0.000294673 |       |                |
| ARHGEF17                                         | 11                                                | 73308289    | 73369388    | +           |       | 9908           |
| protein_coding                                   | Rho guanine nucleotide exchange factor 17         |             |             |             |       |                |
| [Source:HGNC                                     | Symbol;Acc:HGNC:21726]                            |             |             |             |       |                |
| 957                                              | 680                                               | 1014        | 6.121252029 | 7.248848854 |       | 2649           |
| 12.38506859                                      | 4.670110498                                       | 2.990759649 |             | 4.777470268 |       |                |
| ENSG00000105640                                  | 17353.26817                                       | 21737.00425 |             | 20696.08128 |       |                |
| 28182.43744                                      | 27848.05204                                       | 38161.43398 |             | 19928.78457 |       |                |
| 31397.30782                                      | -0.655741168                                      | 1.26E-05    |             | 0.000296455 |       | RPL18A         |
| 19                                               | 17859876                                          | 17864153    |             | +           | 3527  |                |
| protein_coding                                   | ribosomal protein L18a [Source:HGNC               |             |             |             |       |                |
| Symbol;Acc:HGNC:10311]                           | -                                                 | 14999       | 23450       | 21166       | 28054 | 30473          |
| 38892                                            | 232.5688569                                       | 293.1374768 |             | 277.9942339 |       |                |
| 384.5834132                                      | 376.5029209                                       | 514.7553313 |             |             |       |                |
| ENSG00000175505                                  | 188.5847531                                       | 215.0526647 |             | 302.1397106 |       |                |
| 84.38457065                                      | 63.05633154                                       | 107.9337071 |             | 235.2590428 |       |                |
| 85.12486978                                      | 1.468560336                                       | 1.27E-05    |             | 0.000298091 |       | CLCF1          |
| 11                                               | 67364168                                          | 67374177    |             | -           | 1975  |                |
| protein_coding                                   | cardiotrophin like cytokine factor 1 [Source:HGNC |             |             |             |       |                |
| Symbol;Acc:HGNC:17412]                           | -                                                 | 163         | 232         | 309         | 84    | 69             |
| 110                                              | 4.513518399                                       | 5.179106515 |             | 7.247593641 |       |                |
| 2.056427498                                      | 1.522441411                                       | 2.599989661 |             |             |       |                |
| ENSG00000104419                                  | 15251.06881                                       | 20703.45373 |             | 8122.571443 |       |                |
| 37808.30596                                      | 51001.6059                                        | 52614.73858 |             | 14692.36466 |       |                |
| 47141.55015                                      | -1.681930057                                      | 1.27E-05    |             | 0.000298091 |       | NDRG1          |
| 8                                                | 133237171                                         | 133302022   |             | -           | 9823  |                |
| protein_coding                                   | N-myc downstream regulated 1 [Source:HGNC         |             |             |             |       |                |
| Symbol;Acc:HGNC:7679]                            | -                                                 | 13182       | 22335       | 8307        | 37636 | 55809          |
| 53622                                            | 73.38915309                                       | 100.2480124 |             | 39.17441522 |       |                |
| 185.2509878                                      | 247.5817877                                       | 254.8266824 |             |             |       |                |
| ENSG00000178951                                  | 1077.13132                                        | 1440.482073 |             | 1530.254521 |       |                |
| 2376.832073                                      | 2074.461922                                       | 2186.148177 |             | 1349.289305 |       |                |
| 2212.480724                                      | -0.71267308                                       | 1.29E-05    |             | 0.000300726 |       | ZBTB7A         |
| 19                                               | 4044364                                           | 4066945     | -           | 5725        |       | protein_coding |
| finger and BTB domain containing 7A [Source:HGNC | Symbol;Acc:HGNC:18078]                            |             |             |             |       |                |
| ZBTB                                             | 931                                               | 1554        |             | 1565        | 2366  | 2270           |
| 2228                                             | 8.893422047                                       | 11.96766659 |             | 12.66313704 |       |                |

|                                     |                                                        |             |             |             |      |
|-------------------------------------|--------------------------------------------------------|-------------|-------------|-------------|------|
| 19.98206953                         | 17.27861644                                            | 18.16710521 |             |             |      |
| ENSG00000198157                     | 483.6099804                                            | 445.8634987 | 510.4107732 |             |      |
| 263.1994942                         | 249.4837465                                            | 257.0784661 | 479.9614175 |             |      |
| 256.5872356                         | 0.903448318                                            | 1.29E-05    | 0.000300726 | HMGN5       |      |
| X                                   | 81113701                                               | 81201942    | - 2416      |             |      |
| protein_coding                      | high mobility group nucleosome binding domain 5        |             |             |             |      |
| [Source:HGNC Symbol;Acc:HGNC:8013]  |                                                        | -           | 418 481     | 522         |      |
| 262                                 | 273                                                    | 262         | 9.461806551 | 8.777727705 |      |
| 10.00866213                         | 5.243310514                                            | 4.924071096 | 5.062329358 |             |      |
| ENSG00000143458                     | 301.9669974                                            | 334.6293618 | 267.916766  |             |      |
| 793.6167954                         | 601.3197993                                            | 459.2088631 | 301.5043751 |             |      |
| 618.0484859                         | -1.035169091                                           | 1.29E-05    | 0.000300726 | GABPB2      |      |
| 1                                   | 151070578                                              | 151125542   | + 9189      |             |      |
| protein_coding                      | GA binding protein transcription factor subunit beta 2 |             |             |             |      |
| [Source:HGNC Symbol;Acc:HGNC:28441] |                                                        | -           | 261 361     | 274         |      |
| 790                                 | 658                                                    | 468         | 1.553341583 | 1.732099787 |      |
| 1.38128968                          | 4.156808871                                            | 3.120442899 | 2.377517035 |             |      |
| ENSG00000164949                     | 1660.240005                                            | 1606.406327 | 1001.265578 |             |      |
| 2324.594006                         | 2991.977239                                            | 2341.180229 | 1422.637303 |             |      |
| 2552.583825                         | -0.843776505                                           | 1.29E-05    | 0.000300931 | GEM         |      |
| 8                                   | 94249253                                               | 94262350    | - 2648      |             |      |
| protein_coding                      | GTP binding protein overexpressed in skeletal muscle   |             |             |             |      |
| [Source:HGNC Symbol;Acc:HGNC:4234]  |                                                        | -           | 1435 1733   | 1024        |      |
| 2314                                | 3274                                                   | 2386        | 29.63661736 | 28.85456556 |      |
| 17.91366431                         | 42.25193377                                            | 53.8789709  | 42.06283054 |             |      |
| ENSG00000160214                     | 1551.485607                                            | 1846.486673 | 1688.657865 |             |      |
| 2643.045302                         | 2390.657439                                            | 2715.023342 | 1695.543381 |             |      |
| 2582.908695                         | -0.606776889                                           | 1.30E-05    | 0.000301196 | RRP1        |      |
| 21                                  | 43789513                                               | 43805293    | + 4251      |             |      |
| protein_coding                      | ribosomal RNA processing 1 [Source:HGNC                |             |             |             |      |
| Symbol;Acc:HGNC:18785]              |                                                        | -           | 1341 1992   | 1727 2631   | 2616 |
| 2767                                | 17.2517194                                             | 20.66008895 | 18.81930966 |             |      |
| 29.92477954                         | 26.81669376                                            | 30.38533928 |             |             |      |
| ENSG00000112559                     | 819.1288664                                            | 1018.719304 | 2228.40259  |             |      |
| 348.588643                          | 128.8542427                                            | 163.8629918 | 1355.41692  |             |      |
| 213.7686258                         | 2.665031898                                            | 1.35E-05    | 0.000312064 | MDFI        |      |
| 6                                   | 41636882                                               | 41654246    | + 2523      |             |      |
| protein_coding                      | MyoD family inhibitor [Source:HGNC                     |             |             |             |      |
| Symbol;Acc:HGNC:6967]               |                                                        | -           | 708 1099    | 2279 347    | 141  |
| 167                                 | 15.34654863                                            | 19.20500391 | 41.84364708 |             |      |
| 6.649874372                         | 2.43534481                                             | 3.08990592  |             |             |      |
| ENSG00000131171                     | 2531.432146                                            | 1788.088751 | 1893.017734 |             |      |
| 968.413406                          | 1392.722453                                            | 1207.876304 | 2070.84621  |             |      |
| 1189.670721                         | 0.798945821                                            | 1.35E-05    | 0.000312064 |             |      |
| SH3BGR1 X                           | 81201943                                               | 81298547    | + 2304      |             |      |
| protein_coding                      | SH3 domain binding glutamate rich protein like         |             |             |             |      |
| [Source:HGNC Symbol;Acc:HGNC:10823] |                                                        | -           | 2188 1929   | 1936        |      |
| 964                                 | 1524                                                   | 1231        | 51.9349306  | 36.91337128 |      |
| 38.92470537                         | 20.22999501                                            | 28.82445403 | 24.94144517 |             |      |
| ENSG00000154146                     | 352.8733111                                            | 300.3321696 | 617.968599  |             |      |

|                                     |                                                        |             |             |             |
|-------------------------------------|--------------------------------------------------------|-------------|-------------|-------------|
| 152.6958897                         | 201.9630329                                            | 164.8442073 | 423.7246932 |             |
| 173.16771                           | 1.290634104                                            | 1.35E-05    | 0.000312396 | NRGN        |
| 11                                  | 124739846                                              | 124747210   | + 1309      |             |
| protein_coding                      | neurogranin [Source:HGNC Symbol;Acc:HGNC:8000]         |             |             | -           |
| 305                                 | 324 632                                                | 152 221     | 168         | 12.74250772 |
|                                     | 10.91287854                                            | 22.36556571 | 5.61442336  | 7.357177345 |
|                                     | 5.991225569                                            |             |             |             |
| ENSG00000121211                     | 320.4783842                                            | 242.8611989 | 317.7844853 |             |
| 127.5814342                         | 131.5958223                                            | 54.94806909 | 293.7080228 |             |
| 104.7084419                         | 1.486851473                                            | 1.38E-05    | 0.000317666 | MND1        |
| 4                                   | 153344649                                              | 153415118   | + 1511      |             |
| protein_coding                      | meiotic nuclear divisions 1 [Source:HGNC               |             |             |             |
| Symbol;Acc:HGNC:24839]              | -                                                      | 277 262     | 325 127     | 144         |
| 56                                  | 10.02559179                                            | 7.644881975 | 9.963716282 |             |
| 4.063876235                         | 4.152949265                                            | 1.730093596 |             |             |
| ENSG00000100911                     | 1027.381968                                            | 1172.593193 | 1397.273937 |             |
| 606.7652461                         | 707.3275451                                            | 776.1414759 | 1199.083033 |             |
| 696.7447557                         | 0.783534313                                            | 1.41E-05    | 0.000324831 | PSME2       |
| 14                                  | 24143362                                               | 24147570    | - 3582      |             |
| protein_coding                      | proteasome activator subunit 2 [Source:HGNC            |             |             |             |
| Symbol;Acc:HGNC:9569]               | -                                                      | 888 1265    | 1429 604    | 774         |
| 791                                 | 13.55757754                                            | 15.57036889 | 18.48030366 |             |
| 8.1529086                           | 9.416163197                                            | 10.30853472 |             |             |
| ENSG00000104549                     | 2509.449875                                            | 2173.700425 | 2704.590419 |             |
| 1551.068775                         | 1577.322148                                            | 1685.728262 | 2462.58024  |             |
| 1604.706395                         | 0.61774232                                             | 1.41E-05    | 0.000324831 | SQLE        |
| 8                                   | 124998497                                              | 125022283   | + 4305      |             |
| protein_coding                      | squalene epoxidase [Source:HGNC Symbol;Acc:HGNC:11279] |             |             |             |
| -                                   | 2169 2345                                              | 2766 1544   | 1726 1718   |             |
| 27.55377508                         | 24.01616448                                            | 29.763327   | 17.34104865 |             |
| 17.47134072                         | 18.62927868                                            |             |             |             |
| ENSG00000128039                     | 820.2858281                                            | 913.9738249 | 582.767856  |             |
| 1188.416037                         | 1552.647932                                            | 1414.912779 | 772.342503  |             |
| 1385.325582                         | -0.843098689                                           | 1.43E-05    | 0.000328102 | SRD5A3      |
| 4                                   | 55346109                                               | 55373096    | + 4420      |             |
| protein_coding                      | steroid 5 alpha-reductase 3 [Source:HGNC               |             |             |             |
| Symbol;Acc:HGNC:25812]              | -                                                      | 709 986     | 596 1183    | 1699        |
| 1442                                | 8.772405097                                            | 9.835322468 | 6.246351883 |             |
| 12.94087648                         | 16.75057452                                            | 15.22961858 |             |             |
| ENSG00000125871                     | 844.5820233                                            | 686.8707954 | 784.1943298 |             |
| 339.547439                          | 480.6902955                                            | 445.4718458 | 771.8823828 |             |
| 421.9031935                         | 0.870439717                                            | 1.44E-05    | 0.000329911 | MGME1       |
| 20                                  | 17968913                                               | 17991122    | + 2336      |             |
| protein_coding                      | mitochondrial genome maintenance exonuclease 1         |             |             |             |
| [Source:HGNC Symbol;Acc:HGNC:16205] | -                                                      | 730 741     |             | 802         |
| 338                                 | 526 454                                                | 17.09010513 | 13.98554283 |             |
| 15.90391279                         | 6.995923927                                            | 9.812315491 | 9.072543313 |             |
| ENSG00000130764                     | 3139.993988                                            | 3662.383957 | 3111.35456  |             |
| 5117.321463                         | 4710.033808                                            | 4763.801347 | 3304.577502 |             |
| 4863.718873                         | -0.557390691                                           | 1.45E-05    | 0.000331755 | LRR47       |

|                                     |                                                  |             |             |             |                |             |                |
|-------------------------------------|--------------------------------------------------|-------------|-------------|-------------|----------------|-------------|----------------|
| 1                                   | 3778558                                          | 3796504     | -           | 4516        | protein_coding |             |                |
| leucine rich repeat containing 47   | [Source:HGNC Symbol;Acc:HGNC:29207]              |             |             |             |                |             |                |
| -                                   | 2714                                             | 3951        | 3182        | 5094        | 5154           | 4855        |                |
| 32.86628545                         | 38.57332304                                      |             | 32.63989086 |             | 54.5388811     |             |                |
| 49.73350628                         | 50.18585608                                      |             |             |             |                |             |                |
| ENSG00000112578                     | 1610.490653                                      |             | 1956.793858 |             | 1691.59126     |             |                |
| 2611.903377                         | 2568.860115                                      |             | 2811.182463 |             | 1752.95859     |             |                |
| 2663.981985                         | -0.603368515                                     |             | 1.46E-05    |             | 0.000333564    |             | BYSL           |
| 6                                   | 41921188                                         |             | 41933046    |             | +              | 2248        |                |
| protein_coding                      | bystin like [Source:HGNC Symbol;Acc:HGNC:1157]   |             |             | -           |                |             |                |
| 1392                                | 2111                                             | 1730        | 2600        | 2811        | 2865           | 33.8639521  |                |
| 41.40243503                         |                                                  | 35.64940223 |             | 55.92142859 |                | 54.49079404 |                |
| 59.49416249                         |                                                  |             |             |             |                |             |                |
| ENSG00000161203                     | 11234.09787                                      |             | 10417.07692 |             | 11858.73919    |             |                |
| 7324.379817                         | 7634.385416                                      |             | 8371.730812 |             | 11169.97133    |             |                |
| 7776.832015                         | 0.522351828                                      |             | 1.49E-05    |             | 0.000339952    |             | AP2M1          |
| 3                                   | 184174689                                        |             | 184184091   |             | +              | 4756        |                |
| protein_coding                      | adaptor related protein complex 2 subunit mu 1   |             |             |             |                |             |                |
| [Source:HGNC Symbol;Acc:HGNC:564]   |                                                  |             |             | -           | 9710           | 11238       | 12128          |
| 7291                                | 8354                                             | 8532        | 111.6534371 |             | 104.1792292    |             |                |
| 118.1271696                         | 74.12188729                                      |             | 76.54401218 |             | 83.74425756    |             |                |
| ENSG00000132967                     | 859.6225251                                      |             | 1107.706613 |             | 1484.297996    |             |                |
| 696.1727079                         | 537.3496079                                      |             | 598.5414669 |             | 1150.542378    |             |                |
| 610.6879276                         | 0.914650548                                      |             | 1.49E-05    |             | 0.000340064    |             |                |
| HMGB1P5 3                           | 22381819                                         |             | 22382929    |             | +              | 1111        |                |
| transcribed_processed_pseudogene    | high mobility group box 1                        |             |             |             |                |             |                |
| pseudogene 5                        | [Source:HGNC Symbol;Acc:HGNC:4997]               |             |             | -           | 743            | 1195        |                |
| 1518                                | 693                                              | 588         | 610         | 36.57374795 | 47.4228668     |             |                |
| 63.29365397                         |                                                  | 30.15923992 |             | 23.06332213 | 25.63077935    |             |                |
| ENSG00000157613                     | 1501.736255                                      |             | 1561.912672 |             | 2453.296226    |             |                |
| 915.1707603                         | 994.2795466                                      |             | 1141.153649 |             | 1838.981718    |             |                |
| 1016.867985                         | 0.854995531                                      |             | 1.52E-05    |             | 0.000345158    |             |                |
| CREB3L1 11                          | 46277661                                         |             | 46321422    |             | +              | 4037        |                |
| protein_coding                      | cAMP responsive element binding protein 3 like 1 |             |             |             |                |             |                |
| [Source:HGNC Symbol;Acc:HGNC:18856] |                                                  |             |             | TF_bZIP     | 1298           | 1685        | 2509           |
| 911                                 | 1088                                             | 1163        | 17.5837158  |             | 18.40242743    |             |                |
| 28.79017917                         | 10.91090675                                      |             | 11.74434346 |             | 13.448288      |             |                |
| ENSG00000176022                     | 1637.100771                                      |             | 1791.796555 |             | 2010.353544    |             |                |
| 2697.292526                         | 2720.560855                                      |             | 2780.764782 |             | 1813.083623    |             |                |
| 2732.872721                         | -0.59164662                                      |             | 1.52E-05    |             | 0.000346884    |             |                |
| B3GALT6 1                           | 1232226                                          | 1235041     | +           | 2816        |                |             |                |
| protein_coding                      | "beta-1,3-galactosyltransferase 6 [Source:HGNC   |             |             |             |                |             |                |
| Symbol;Acc:HGNC:17978]"             |                                                  |             |             | -           | 1415           | 1933        | 2056 2685 2977 |
| 2834                                | 27.48011223                                      |             | 30.26447618 |             | 33.82150396    |             |                |
| 46.10126645                         | 46.06857533                                      |             | 46.98002367 |             |                |             |                |
| ENSG00000145794                     | 41.65062033                                      |             | 17.61207168 |             | 72.3570828     |             | 0              |
| 4.569299387                         | 0                                                |             | 43.87325827 |             | 1.523099796    |             |                |
| 4.807046129                         | 1.54E-05                                         |             | 0.000348863 |             | MEGF10 5       |             |                |
| 127290831                           | 127465737                                        |             | +           | 9007        | protein_coding |             |                |
| multiple EGF like domains 10        | [Source:HGNC Symbol;Acc:HGNC:29634]              |             |             |             |                |             |                |

|                                     |                                                        |           |             |           |             |           |                |
|-------------------------------------|--------------------------------------------------------|-----------|-------------|-----------|-------------|-----------|----------------|
| -                                   | 36                                                     | 19        | 74          | 0         | 5           | 0         |                |
| 0.218583336                         | 0.093005235                                            |           | 0.380587055 |           | 0           | 0.0241907 |                |
| 0                                   |                                                        |           |             |           |             |           |                |
| ENSG00000198756                     | 148.0910945                                            |           | 136.2618177 |           | 124.1803989 |           |                |
| 286.3047933                         | 309.7984984                                            |           | 285.5337162 |           | 136.1777703 |           |                |
| 293.8790026                         | -1.110977501                                           |           | 1.59E-05    |           | 0.000360456 |           |                |
| COLGALT2                            | 1                                                      | 183929854 |             | 184037729 | -           | 7806      |                |
| protein_coding                      | collagen beta(1-0)galactosyltransferase 2              |           |             |           |             |           |                |
| [Source:HGNC Symbol;Acc:HGNC:16790] |                                                        |           | -           |           | 128         | 147       | 127            |
| 285                                 | 339                                                    | 291       | 0.896759808 |           | 0.8302765   |           |                |
| 0.753663755                         | 1.765295969                                            |           | 1.892473248 |           | 1.740245334 |           |                |
| ENSG00000164985                     | 2356.730933                                            |           | 2877.256341 |           | 3020.419308 |           |                |
| 1547.050462                         | 1769.232723                                            |           | 1917.295125 |           | 2751.468861 |           |                |
| 1744.526103                         | 0.657601562                                            |           | 1.59E-05    |           | 0.000360456 |           | PSIP1          |
| 9                                   | 15464066                                               |           | 15511019    |           | -           | 6768      |                |
| protein_coding                      | PC4 and SFRS1 interacting protein 1 [Source:HGNC       |           |             |           |             |           |                |
| Symbol;Acc:HGNC:9527]               |                                                        |           | -           |           | 2037        | 3104      | 3089 1540 1936 |
| 1954                                | 16.45983175                                            |           | 20.22065971 |           | 21.1426789  |           |                |
| 11.00174532                         | 12.46532485                                            |           | 13.47752808 |           |             |           |                |
| ENSG00000166710                     | 15352.88144                                            |           | 14983.23824 |           | 13739.04555 |           |                |
| 6796.97625                          | 11536.56709                                            |           | 8230.435777 |           | 14691.72174 |           |                |
| 8854.659707                         | 0.730415581                                            |           | 1.63E-05    |           | 0.000367684 |           | B2M            |
| 15                                  | 44711487                                               |           | 44718877    |           | +           | 6079      |                |
| protein_coding                      | beta-2-microglobulin [Source:HGNC Symbol;Acc:HGNC:914] |           |             |           |             |           |                |
| -                                   | 13270                                                  | 16164     | 14051       | 6766      | 12624       | 8388      |                |
| 119.3805271                         | 117.2332099                                            |           | 107.0724022 |           | 53.81471772 |           |                |
| 90.49476159                         | 64.41282018                                            |           |             |           |             |           |                |
| ENSG00000197256                     | 2733.90044                                             |           | 2615.856119 |           | 3500.51833  |           |                |
| 1902.671153                         | 1509.696517                                            |           | 2001.67966  |           | 2950.09163  |           |                |
| 1804.682443                         | 0.709242899                                            |           | 1.65E-05    |           | 0.000372504 |           | KANK2          |
| 19                                  | 11164267                                               |           | 11197791    |           | -           | 7638      |                |
| protein_coding                      | KN motif and ankyrin repeat domains 2 [Source:HGNC     |           |             |           |             |           |                |
| Symbol;Acc:HGNC:29300]              |                                                        |           | -           |           | 2363        | 2822      | 3580 1894 1652 |
| 2040                                | 16.91915933                                            |           | 16.2896335  |           | 21.71229987 |           |                |
| 11.98951284                         | 9.425165539                                            |           | 12.46799298 |           |             |           |                |
| ENSG00000161011                     | 8075.592496                                            |           | 9868.321845 |           | 7825.320725 |           |                |
| 12328.18394                         | 13233.60488                                            |           | 12364.29676 |           | 8589.745022 |           |                |
| 12642.02853                         | -0.557467994                                           |           | 1.66E-05    |           | 0.000373996 |           | SQSTM1         |
| 5                                   | 179806398                                              |           | 179838078   |           | +           | 7654      |                |
| protein_coding                      | sequestosome 1 [Source:HGNC Symbol;Acc:HGNC:11280]     |           |             |           |             |           |                |
| -                                   | 6980                                                   | 10646     | 8003        | 12272     | 14481       | 12601     |                |
| 49.87256184                         | 61.32420996                                            |           | 48.43583765 |           | 77.52255989 |           |                |
| 82.44582979                         | 76.85331223                                            |           |             |           |             |           |                |
| ENSG00000263465                     | 1168.531292                                            |           | 1102.144906 |           | 981.7096098 |           |                |
| 1685.682257                         | 1608.393384                                            |           | 1739.695116 |           | 1084.128603 |           |                |
| 1677.923586                         | -0.630456085                                           |           | 1.67E-05    |           | 0.000376756 |           | SRSF8          |
| 11                                  | 95067197                                               |           | 95071224    |           | +           | 4028      |                |
| protein_coding                      | serine and arginine rich splicing factor 8             |           |             |           |             |           |                |
| [Source:HGNC Symbol;Acc:HGNC:16988] |                                                        |           | -           |           | 1010        | 1189      | 1004           |
| 1678                                | 1760                                                   | 1773      | 13.71281524 |           | 13.01446593 |           |                |

|                                     |                                                       |              |             |             |
|-------------------------------------|-------------------------------------------------------|--------------|-------------|-------------|
| 11.54640287                         | 20.14205192                                           | 19.04065148  | 20.54779904 |             |
| ENSG00000071859                     | 2928.270001                                           | 3139.583514  | 2811.170446 |             |
| 4386.993096                         | 4211.980175                                           | 4186.846622  | 2959.674654 |             |
| 4261.939964                         | -0.52598118                                           | 1.68E-05     | 0.000378318 | FAM50A      |
| X                                   | 154444126                                             | 154450654    | + 2567      |             |
| protein_coding                      | family with sequence similarity                       | 50 member A  |             |             |
| [Source:HGNC Symbol;Acc:HGNC:18786] | -                                                     | 2531         | 3387        | 2875        |
| 4367                                | 4609                                                  | 4267         | 53.92137885 | 58.17324444 |
| 51.88172844                         | 82.25428654                                           | 78.24190883  | 77.596621   |             |
| ENSG00000066056                     | 672.1947336                                           | 637.7423849  | 1477.453407 |             |
| 315.4375617                         | 356.4053522                                           | 500.4199149  | 929.1301751 |             |
| 390.7542763                         | 1.249935282                                           | 1.69E-05     | 0.000379842 | TIE1        |
| 1                                   | 43300993                                              | 43323108     | + 6694      |             |
| protein_coding                      | tyrosine kinase with immunoglobulin like and EGF like | domains 1    |             |             |
| [Source:HGNC Symbol;Acc:HGNC:11809] | -                                                     | 581          | 688         |             |
| 1511                                | 314                                                   | 390          | 510         | 4.746627348 |
| 10.45637649                         | 2.268011                                              | 2.538852654  | 3.556562982 |             |
| ENSG00000148606                     | 1859.237413                                           | 1725.056073  | 1622.167572 |             |
| 2891.176123                         | 2415.331656                                           | 2586.484109  | 1735.487019 |             |
| 2630.997296                         | -0.600421399                                          | 1.74E-05     | 0.000389502 | POLR3A      |
| 10                                  | 77969251                                              | 78029545     | - 8917      |             |
| protein_coding                      | RNA polymerase III subunit A                          | [Source:HGNC |             |             |
| Symbol;Acc:HGNC:30074]              | -                                                     | 1607         | 1861        | 1659        |
| 2636                                | 9.855798659                                           | 9.201562164  | 8.618468034 | 2878        |
| 15.60534015                         | 12.91626641                                           | 13.79979628  |             | 2643        |
| ENSG00000100644                     | 5254.919931                                           | 4434.534258  | 4629.875501 |             |
| 2621.949159                         | 3669.147408                                           | 2700.30511   | 4773.109896 |             |
| 2997.133892                         | 0.671057429                                           | 1.75E-05     | 0.000391954 | HIF1A       |
| 14                                  | 61695513                                              | 61748259     | + 5151      |             |
| protein_coding                      | hypoxia inducible factor 1 subunit alpha              | [Source:HGNC |             |             |
| Symbol;Acc:HGNC:4910]               | Others                                                | 4542         | 4784        | 4735        |
| 2752                                | 48.2225634                                            | 40.94808339  | 42.58247394 | 2610        |
| 24.49910246                         | 33.96664072                                           | 24.94037134  |             | 4015        |
| ENSG00000198176                     | 5971.079208                                           | 5988.10437   | 6465.203128 |             |
| 4276.489491                         | 4278.691946                                           | 4462.568183  | 6141.462235 |             |
| 4339.249873                         | 0.501172709                                           | 1.77E-05     | 0.000395552 | TFDP1       |
| 13                                  | 113584721                                             | 113641470    | + 3741      |             |
| protein_coding                      | transcription factor Dp-1                             | [Source:HGNC |             |             |
| Symbol;Acc:HGNC:11749]              | E2F                                                   | 5161         | 6460        | 6612        |
| 4548                                | 75.44680682                                           | 76.13402104  | 81.8742986  | 4257        |
| 55.01956577                         | 54.5383882                                            | 56.75168801  |             | 4682        |
| ENSG00000079246                     | 15507.9143                                            | 12636.19795  | 14311.05762 |             |
| 10281.8581                          | 9643.049426                                           | 9468.729763  | 14151.72329 |             |
| 9797.879097                         | 0.530376221                                           | 1.77E-05     | 0.000395552 | XRCC5       |
| 2                                   | 216107464                                             | 216206303    | + 5463      |             |
| protein_coding                      | X-ray repair cross complementing 5                    | [Source:HGNC |             |             |
| Symbol;Acc:HGNC:12833]              | -                                                     | 13404        | 13632       | 14636       |
| 9650                                | 134.1831341                                           | 110.0176426  | 124.1062508 | 10235       |
| 90.58532837                         | 84.17094048                                           | 82.45977561  |             | 10552       |
| ENSG00000114473                     | 746.2402808                                           | 794.3971277  | 616.9908006 |             |

|                              |                                                     |             |                |            |
|------------------------------|-----------------------------------------------------|-------------|----------------|------------|
| 1135.173391                  | 1273.920669                                         | 1144.097296 | 719.209403     |            |
| 1184.397119                  | -0.719835601                                        | 1.78E-05    | 0.000396426    | IQCG       |
| 3                            | 197889075                                           | 197960142   | - 7474         |            |
| protein_coding               | IQ motif containing G [Source:HGNC                  |             |                |            |
| Symbol;Acc:HGNC:25251]       | -                                                   | 645 857     | 631 1130       | 1394       |
| 1166                         | 4.719558068                                         | 5.055471732 | 3.910918102    |            |
| 7.310154678                  | 8.127711471                                         | 7.282684447 |                |            |
| ENSG00000143384              | 13071.35301                                         | 17054.97404 | 10632.57998    |            |
| 20230.19624                  | 25307.52159                                         | 21115.75798 | 13586.30234    |            |
| 22217.82527                  | -0.709542022                                        | 1.78E-05    | 0.000397175    | MCL1       |
| 1                            | 150574551                                           | 150579738   | - 4371         |            |
| protein_coding               | "MCL1, BCL2 family apoptosis regulator [Source:HGNC |             |                |            |
| Symbol;Acc:HGNC:6943]"       | -                                                   | 11298 18399 | 10874 20138    | 27693      |
| 21520                        | 141.3564001                                         | 185.5869228 | 115.2420507    |            |
| 222.7597627                  | 276.0881693                                         | 229.8304124 |                |            |
| ENSG00000136271              | 3984.576011                                         | 4321.446219 | 3703.9004      |            |
| 6650.30783                   | 5692.433176                                         | 5483.032323 | 4003.307543    |            |
| 5941.924443                  | -0.569656045                                        | 1.80E-05    | 0.000399895    | DDX56      |
| 7                            | 44565417                                            | 44575051    | - 4068         |            |
| protein_coding               | DEAD-box helicase 56 [Source:HGNC                   |             |                |            |
| Symbol;Acc:HGNC:18193]       | -                                                   | 3444 4662   | 3788 6620      | 6229       |
| 5588                         | 46.29956506                                         | 50.5272059  | 43.13516681    |            |
| 78.68252016                  | 66.72613724                                         | 64.12413046 |                |            |
| ENSG00000100162              | 297.3391507                                         | 482.0145932 | 598.4126307    |            |
| 204.9339573                  | 214.7570712                                         | 195.2618884 | 459.2554582    |            |
| 204.9843056                  | 1.16495896                                          | 1.84E-05    | 0.000408285    | CENPM      |
| 22                           | 41938721                                            | 41947164    | - 1778         |            |
| protein_coding               | centromere protein M [Source:HGNC                   |             |                |            |
| Symbol;Acc:HGNC:18352]       | -                                                   | 257 520     | 612 204        | 235        |
| 199                          | 7.904894524                                         | 12.89453083 | 15.9449118     |            |
| 5.547529589                  | 5.759631568                                         | 5.224772148 |                |            |
| ENSG00000164877              | 1169.688254                                         | 1185.570509 | 1937.018662    |            |
| 846.8594412                  | 615.0276975                                         | 807.5403725 | 1430.759142    |            |
| 756.4758371                  | 0.919947918                                         | 1.92E-05    | 0.000425384    |            |
| MICALL2                      | 7 1428465 1459502                                   | - 8843      | protein_coding | MICAL      |
| like 2 [Source:HGNC          | Symbol;Acc:HGNC:29672]                              |             | -              | 1011 1279  |
| 1981                         | 843 673                                             | 823         | 6.252392642    | 6.37683056 |
| 10.37737011                  | 4.609238344                                         | 3.316454451 | 4.344564468    |            |
| ENSG00000004660              | 556.498566                                          | 703.5559159 | 420.4533189    |            |
| 1057.820868                  | 970.5191898                                         | 1029.29508  | 560.169267     |            |
| 1019.211713                  | -0.863041322                                        | 1.93E-05    | 0.000426673    | CAMKK1     |
| 17                           | 3860315 3894891                                     | - 7424      | protein_coding |            |
| calcium/calmodulin dependent | protein kinase kinase 1 [Source:HGNC                |             |                |            |
| Symbol;Acc:HGNC:1469]        | -                                                   | 481 759     | 430 1053       | 1062       |
| 1049                         | 3.543250246                                         | 4.507521124 | 2.683075837    |            |
| 6.857907523                  | 6.233689285                                         | 6.596044255 |                |            |
| ENSG00000104824              | 4364.059441                                         | 5047.248962 | 5164.731234    |            |
| 3370.359935                  | 2942.628805                                         | 3487.239956 | 4858.679879    |            |
| 3266.742899                  | 0.572949818                                         | 1.96E-05    | 0.00043241     | HNRNPL     |
| 19                           | 38836388                                            | 38852347    | - 6821         |            |

|                        |                                                        |             |             |             |       |        |
|------------------------|--------------------------------------------------------|-------------|-------------|-------------|-------|--------|
| protein_coding         | heterogeneous nuclear ribonucleoprotein L [Source:HGNC |             |             |             |       |        |
| Symbol;Acc:HGNC:5045]  | -                                                      | 3772        | 5445        | 5282        | 3355  | 3220   |
|                        | 3554                                                   | 30.24254582 | 35.19522877 | 35.87176974 |       |        |
| 23.78185306            | 20.57152178                                            | 24.32290311 |             |             |       |        |
| ENSG00000269190        | 1044.736393                                            | 1428.431708 | 1134.246163 |             |       |        |
| 1870.524649            | 1855.135551                                            | 2086.064194 | 1202.471421 |             |       |        |
| 1937.241465            | -0.687273846                                           | 1.96E-05    | 0.000432769 |             |       | FBX017 |
|                        | 19                                                     | 38941401    | 38975910    | -           | 4960  |        |
| protein_coding         | F-box protein 17 [Source:HGNC                          |             |             |             |       |        |
| Symbol;Acc:HGNC:18754] | -                                                      | 903         | 1541        | 1160        | 1862  | 2030   |
|                        |                                                        |             |             |             |       | 2126   |
| 9.956364475            | 13.6979293                                             | 10.83374898 | 18.15094399 |             |       |        |
| 17.83499365            | 20.00910299                                            |             |             |             |       |        |
| ENSG00000172175        | 1382.569202                                            | 1010.376744 | 1215.403431 |             |       |        |
| 753.4336665            | 702.7582457                                            | 717.2685447 | 1202.783126 |             |       |        |
| 724.486819             | 0.730769204                                            | 1.98E-05    | 0.00043558  |             |       | MALT1  |
|                        | 18                                                     | 58671386    | 58754477    | +           | 11527 |        |
| protein_coding         | MALT1 paracaspase [Source:HGNC                         |             |             |             |       |        |
| Symbol;Acc:HGNC:6819]  | -                                                      | 1195        | 1090        | 1243        | 750   | 769    |
|                        |                                                        |             |             |             |       | 731    |
| 5.669520433            | 4.169117764                                            | 4.995250722 | 3.145909223 |             |       |        |
| 2.907158058            | 2.96037767                                             |             |             |             |       |        |
| ENSG00000150687        | 4964.52255                                             | 3655.8953   | 4899.747863 |             |       |        |
| 2698.297104            | 2553.324497                                            | 3234.086352 | 4506.721904 |             |       |        |
| 2828.569318            | 0.671891293                                            | 1.99E-05    | 0.000438602 |             |       | PRSS23 |
|                        | 11                                                     | 86791059    | 86952910    | +           | 11725 |        |
| protein_coding         | serine protease 23 [Source:HGNC                        |             |             |             |       |        |
| Symbol;Acc:HGNC:14370] | -                                                      | 4291        | 3944        | 5011        | 2686  | 2794   |
|                        |                                                        |             |             |             |       | 3296   |
| 20.01429865            | 14.8305758                                             | 19.79766664 | 11.07629142 |             |       |        |
| 10.38417858            | 13.122615                                              |             |             |             |       |        |
| ENSG00000108861        | 3332.049626                                            | 3542.80726  | 2751.524743 |             |       |        |
| 4749.645834            | 5106.648995                                            | 4602.882002 | 3208.793876 |             |       |        |
| 4819.72561             | -0.58696893                                            | 2.02E-05    | 0.000442935 |             |       | DUSP3  |
|                        | 17                                                     | 43766121    | 43778988    | -           | 5012  |        |
| protein_coding         | dual specificity phosphatase 3 [Source:HGNC            |             |             |             |       |        |
| Symbol;Acc:HGNC:3069]  | -                                                      | 2880        | 3822        | 2814        | 4728  | 5588   |
|                        | 4691                                                   | 31.42506164 | 33.62122851 | 26.00851083 |       |        |
| 45.61079289            | 48.58519307                                            | 43.69184723 |             |             |       |        |
| ENSG00000114446        | 1387.197049                                            | 1083.605884 | 1101.978815 |             |       |        |
| 649.9621096            | 744.7958001                                            | 755.53595   | 1190.927249 |             |       |        |
| 716.7646199            | 0.731708947                                            | 2.03E-05    | 0.000444992 |             |       | IFT57  |
|                        | 3                                                      | 108160812   | 108222570   | -           | 3766  |        |
| protein_coding         | intraflagellar transport 57 [Source:HGNC               |             |             |             |       |        |
| Symbol;Acc:HGNC:17367] | -                                                      | 1199        | 1169        | 1127        | 647   | 815    |
|                        | 770                                                    | 17.41139548 | 13.68573585 | 13.86264354 |       |        |
| 8.30663603             | 9.430525436                                            | 9.544571712 |             |             |       |        |
| ENSG00000121064        | 608.5618414                                            | 579.344463  | 750.9491836 |             |       |        |
| 363.6573164            | 371.0271102                                            | 350.2939405 | 646.2851627 |             |       |        |
| 361.6594557            | 0.837601623                                            | 2.04E-05    | 0.00044677  |             |       | SCPEP1 |
|                        | 17                                                     | 56978105    | 57006768    | +           | 3853  |        |
| protein_coding         | serine carboxypeptidase 1 [Source:HGNC                 |             |             |             |       |        |
| Symbol;Acc:HGNC:29507] | -                                                      | 526         | 625         | 768         | 362   | 406    |



|                                      |                                                |                |                                |                     |
|--------------------------------------|------------------------------------------------|----------------|--------------------------------|---------------------|
| 357                                  | 7.46588761                                     | 7.151793502    | 9.233464139                    |                     |
| 4.542665703                          | 4.591828109                                    | 4.325290117    |                                |                     |
| ENSG00000151348                      | 2177.401874                                    | 1846.486673    | 2632.233336                    |                     |
| 1253.713621                          | 1202.639599                                    | 1552.282952    | 2218.707294                    |                     |
| 1336.212057                          | 0.731605793                                    | 2.04E-05       | 0.00044677                     | EXT2                |
| 11                                   | 44095549                                       | 44245429       | + 5286                         |                     |
| protein_coding                       | exostosin glycosyltransferase 2 [Source:HGNC   |                |                                |                     |
| Symbol;Acc:HGNC:3513]                | -                                              | 1882 1992      | 2692 1248                      | 1316                |
| 1582                                 | 19.47095141                                    | 16.61483885    | 23.59121739                    |                     |
| 11.41533453                          | 10.84894052                                    | 13.97093127    |                                |                     |
| ENSG00000133067                      | 17.35442514                                    | 15.75816939    | 31.28954932                    | 0                   |
| 0                                    | 0                                              | 21.46738128    | 0                              | 6.917485676         |
| 2.07E-05                             | 1                                              | LGR6           | 1                              | 202193901 202319781 |
| +                                    | 4583                                           | protein_coding | leucine rich repeat containing |                     |
| G protein-coupled                    | receptor 6 [Source:HGNC Symbol;Acc:HGNC:19719] |                |                                |                     |
| -                                    | 15                                             | 17             | 32                             | 0 0 0               |
| 0.178993028                          | 0.1635434                                      | 0.32344659     | 0                              | 0 0                 |
| ENSG00000280287                      | 144.6202095                                    | 121.4305995    | 188.7150943                    |                     |
| 360.6435817                          | 319.8509571                                    | 316.9326128    | 151.5886344                    |                     |
| 332.4757172                          | -1.13308269                                    | 2.08E-05       | 0.000454396                    |                     |
| AC131212.3                           | 12                                             | 132550729      | 132554947                      | + 4219              |
| TEC                                  | novel transcript                               |                | -                              | 125 131 193         |
| 359                                  | 350                                            | 323            | 1.620299136                    | 1.368975665         |
| 2.119094086                          | 4.114207009                                    | 3.615073376    | 3.573872319                    |                     |
| ENSG00000128656                      | 488.2378272                                    | 564.5132448    | 657.0805357                    |                     |
| 292.3322626                          | 316.1955176                                    | 319.8762593    | 569.9438692                    |                     |
| 309.4680132                          | 0.881591686                                    | 2.09E-05       | 0.000455993                    | CHN1                |
| 2                                    | 174799363                                      | 175005369      | -                              | 4971                |
| protein_coding                       | chimerin 1 [Source:HGNC Symbol;Acc:HGNC:1943]  |                |                                | -                   |
| 422                                  | 609                                            | 672            | 291                            | 346 326 4.642622807 |
| 5.40141427                           | 6.262214879                                    | 2.830417119    | 3.033129363                    |                     |
| 3.061398554                          |                                                |                |                                |                     |
| ENSG00000136718                      | 1763.209594                                    | 2144.037989    | 1873.461765                    |                     |
| 2897.203592                          | 2865.864576                                    | 2850.431084    | 1926.903116                    |                     |
| 2871.166417                          | -0.574955493                                   | 2.12E-05       | 0.000461943                    | IMP4                |
| 2                                    | 130342225                                      | 130347810      | + 3861                         |                     |
| protein_coding                       | "IMP4, U3 small nucleolar ribonucleoprotein    |                |                                |                     |
| [Source:HGNC Symbol;Acc:HGNC:30856]" | -                                              | 1524           | 2313                           | 1916                |
| 2884                                 | 3136                                           | 2905           | 21.58638299                    | 26.41251697         |
| 22.98783964                          | 36.11575273                                    | 35.39442408    | 35.12306205                    |                     |
| ENSG00000122642                      | 2685.308049                                    | 2550.042588    | 3403.716287                    |                     |
| 1719.837916                          | 1755.524825                                    | 2010.510599    | 2879.688975                    |                     |
| 1828.624447                          | 0.655235116                                    | 2.13E-05       | 0.000463748                    | FKBP9               |
| 7                                    | 32957404                                       | 33006931       | + 5170                         |                     |
| protein_coding                       | FK506 binding protein 9 [Source:HGNC           |                |                                |                     |
| Symbol;Acc:HGNC:3725]                | -                                              | 2321 2751      | 3481 1712                      | 1921                |
| 2049                                 | 24.55157231                                    | 23.46032398    | 31.19004031                    |                     |
| 16.01085166                          | 16.19181076                                    | 18.50109577    |                                |                     |
| ENSG00000143226                      | 38.1797353                                     | 7.415609127    | 22.48936357                    | 0                   |
| 0                                    | 0                                              | 22.69490267    | 0                              | 6.993809159         |

|                  |                                    |                |             |                             |           |        |
|------------------|------------------------------------|----------------|-------------|-----------------------------|-----------|--------|
| 2.16E-05         | 1                                  | FCGR2A         | 1           | 161505430                   | 161524013 |        |
| +                | 5314                               | protein_coding |             | Fc fragment of IgG receptor |           |        |
| IIa [Source:HGNC | Symbol;Acc:HGNC:3616]              |                | -           | 33                          | 8         | 23     |
| 0                | 0                                  | 0              | 0.339615187 | 0.066374673                 |           |        |
| 0.200497398      | 0                                  | 0              | 0           |                             |           |        |
| ENSG00000142192  | 10254.15133                        |                | 9315.858966 | 13328.37021                 |           |        |
| 7082.276465      | 5357.046601                        |                | 7682.917517 | 10966.12684                 |           |        |
| 6707.413528      | 0.709287072                        |                | 2.16E-05    | 0.000468681                 |           | APP    |
| 21               | 25880550                           |                | 26171128    | -                           | 6316      |        |
| protein_coding   | amyloid beta precursor protein     |                |             |                             |           |        |
| [Source:HGNC     | Symbol;Acc:HGNC:620]               | -              | 8863        | 10050                       | 13631     | 7050   |
| 7830             | 76.74204018                        |                | 70.15488198 | 99.9742264                  |           | 5862   |
| 53.96947733      | 40.44476259                        |                | 57.87162491 |                             |           |        |
| ENSG00000115414  | 41839.20508                        |                | 14581.8684  | 41520.25415                 |           |        |
| 10152.26751      | 5104.821275                        |                | 8438.453467 | 32647.10921                 |           |        |
| 7898.514085      | 2.047304022                        |                | 2.18E-05    | 0.000472987                 |           | FN1    |
| 2                | 215360440                          |                | 215436172   | -                           | 17315     |        |
| protein_coding   | fibronectin 1                      |                |             |                             |           |        |
| [Source:HGNC     | Symbol;Acc:HGNC:3778]              | -              | 36163       | 15731                       | 42463     | 10106  |
| -                | 36163                              | 15731          | 42463       | 10106                       | 5586      | 8600   |
| 114.2185568      | 40.05601981                        |                | 113.603218  | 28.22006531                 |           |        |
| 14.05843681      | 23.18579497                        |                |             |                             |           |        |
| ENSG00000187676  | 843.4250616                        |                | 694.2864045 | 791.0389187                 |           |        |
| 478.1792337      | 459.6715183                        |                | 433.6972596 | 776.2501283                 |           |        |
| 457.1826705      | 0.763217736                        |                | 2.18E-05    | 0.000473039                 |           | B3GLCT |
| 13               | 31199936                           |                | 31332276    | +                           | 4566      |        |
| protein_coding   | beta 3-glucosyltransferase         |                |             |                             |           |        |
| [Source:HGNC     | Symbol;Acc:HGNC:20207]             | -              | 729         | 749                         | 809       | 476    |
| 442              | 8.731449246                        |                | 7.232357218 | 8.207578974                 |           | 503    |
| 5.04048425       | 4.800546443                        |                | 4.518896537 |                             |           |        |
| ENSG00000105321  | 507.9061756                        |                | 796.25103   | 864.3737999                 |           |        |
| 1363.212647      | 1161.515904                        |                | 1427.668581 | 722.8436685                 |           |        |
| 1317.465711      | -0.864622681                       |                | 2.20E-05    | 0.000476032                 |           | CCDC9  |
| 19               | 47255980                           |                | 47273701    | +                           | 3845      |        |
| protein_coding   | coiled-coil domain containing 9    |                |             |                             |           |        |
| [Source:HGNC     | Symbol;Acc:HGNC:24560]             | -              | 439         | 859                         | 884       | 1357   |
| 1455             | 6.24399992                         |                | 9.849876328 | 10.65021504                 |           | 1271   |
| 17.06415236      | 14.40481895                        |                | 17.66496108 |                             |           |        |
| ENSG00000135631  | 1221.75153                         |                | 1592.50206  | 1366.962186                 |           |        |
| 2614.917112      | 1957.487857                        |                | 2196.941548 | 1393.738592                 |           |        |
| 2256.448839      | -0.694434623                       |                | 2.23E-05    | 0.000481473                 |           |        |
| RAB11FIP5        | 2                                  | 73073382       | 73156721    | -                           |           | 7058   |
| protein_coding   | RAB11 family interacting protein 5 |                |             |                             |           |        |
| [Source:HGNC     | Symbol;Acc:HGNC:24845]             | -              | 1056        | 1718                        |           | 1398   |
| 2603             | 2142                               | 2239           | 8.182329735 | 10.73187149                 |           |        |
| 9.175462681      | 17.8317403                         |                | 13.22502221 | 14.80875252                 |           |        |
| ENSG00000110492  | 1439.260325                        |                | 1658.315591 | 2560.854052                 |           |        |
| 917.1799167      | 1220.916796                        |                | 897.8122003 | 1886.143322                 |           |        |
| 1011.969638      | 0.898325204                        |                | 2.25E-05    | 0.000484553                 |           | MDK    |
| 11               | 46380756                           |                | 46383837    | +                           | 2196      |        |
| protein_coding   | midkine                            |                |             |                             |           | -      |
| [Source:HGNC     | Symbol;Acc:HGNC:6972]              |                |             |                             |           |        |

|                                     |                                                   |         |             |             |             |                |             |        |
|-------------------------------------|---------------------------------------------------|---------|-------------|-------------|-------------|----------------|-------------|--------|
|                                     | 1244                                              | 1789    | 2619        | 913         | 1336        | 915            | 30.98009587 |        |
|                                     | 35.91798484                                       |         | 55.24660798 |             | 20.10201803 |                | 26.51140353 |        |
|                                     | 19.45068023                                       |         |             |             |             |                |             |        |
| ENSG0000001617                      | 627.0732282                                       |         |             | 1057.651252 |             | 1064.822475    |             |        |
| 300.3688884                         | 493.4843338                                       |         |             | 521.0254408 |             | 916.5156517    |             |        |
| 438.2928877                         | 1.064636874                                       |         |             | 2.26E-05    |             | 0.000485933    |             | SEMA3F |
| 3                                   | 50155045                                          |         |             | 50189075    |             | +              | 4826        |        |
| protein_coding                      | semaphorin 3F [Source:HGNC Symbol;Acc:HGNC:10728] |         |             |             |             |                |             |        |
| -                                   | 542                                               | 1141    |             | 1089        | 299         | 540            | 531         |        |
| 6.141955729                         | 10.42394917                                       |         |             | 10.45304976 |             | 2.995608728    |             |        |
| 4.876015079                         | 5.136333793                                       |         |             |             |             |                |             |        |
| ENSG00000136143                     | 1122.252825                                       |         |             | 977.0065025 |             | 968.020432     |             |        |
| 604.7560897                         | 660.7206914                                       |         |             | 629.9403635 |             | 1022.426587    |             |        |
| 631.8057148                         | 0.693799301                                       |         |             | 2.26E-05    |             | 0.000485933    |             | SUCLA2 |
| 13                                  | 47745736                                          |         |             | 48037968    |             | -              | 8928        |        |
| protein_coding                      | succinate-CoA ligase ADP-forming beta subunit     |         |             |             |             |                |             |        |
| [Source:HGNC Symbol;Acc:HGNC:11448] |                                                   |         |             | -           |             | 970            | 1054        | 990    |
| 602                                 | 723                                               | 642     |             | 5.94172114  |             | 5.204995846    |             |        |
| 5.136691325                         | 3.260194618                                       |         |             | 3.528927316 |             | 3.356810943    |             |        |
| ENSG00000163719                     | 1057.462972                                       |         |             | 1149.419415 |             | 1084.378444    |             |        |
| 1512.894802                         | 1797.562379                                       |         |             | 1770.112797 |             | 1097.086943    |             |        |
| 1693.523326                         | -0.626226631                                      |         |             | 2.26E-05    |             | 0.000485933    |             | MTMR14 |
| 3                                   | 9649433                                           | 9702393 | +           | 6019        |             | protein_coding |             |        |
| myotubularin related protein 14     | [Source:HGNC Symbol;Acc:HGNC:26190]               |         |             |             |             |                |             |        |
| -                                   | 914                                               | 1240    |             | 1109        | 1506        | 1967           | 1804        |        |
| 8.304558813                         | 9.083041528                                       |         |             | 8.535120533 |             | 12.0976731     |             |        |
| 14.24093861                         | 13.99130506                                       |         |             |             |             |                |             |        |
| ENSG00000105671                     | 2288.470195                                       |         |             | 2922.676947 |             | 2702.634822    |             |        |
| 4643.160542                         | 3587.813879                                       |         |             | 4051.43888  |             | 2637.927321    |             |        |
| 4094.137767                         | -0.63374274                                       |         |             | 2.27E-05    |             | 0.000486218    |             | DDX49  |
| 19                                  | 18919675                                          |         |             | 18928633    |             | +              | 2780        |        |
| protein_coding                      | DEAD-box helicase 49 [Source:HGNC                 |         |             |             |             |                |             |        |
| Symbol;Acc:HGNC:18684]              |                                                   |         |             | -           | 1978        | 3153           | 2764        | 4622   |
| 4129                                | 38.91134153                                       |         |             | 50.00496559 |             | 46.05700557    |             | 3926   |
| 80.38710002                         | 61.54093597                                       |         |             | 69.33397871 |             |                |             |        |
| ENSG00000174307                     | 509.0631373                                       |         |             | 971.4447956 |             | 688.370085     |             |        |
| 1311.979158                         | 1231.883115                                       |         |             | 1560.132676 |             | 722.9593393    |             |        |
| 1367.998316                         | -0.918654587                                      |         |             | 2.27E-05    |             | 0.000486218    |             | PHLDA3 |
| 1                                   | 201464383                                         |         |             | 201469237   |             | -              | 3138        |        |
| protein_coding                      | pleckstrin homology like domain family A member 3 |         |             |             |             |                |             |        |
| [Source:HGNC Symbol;Acc:HGNC:8934]  |                                                   |         |             | -           |             | 440            | 1048        | 704    |
| 1306                                | 1348                                              | 1590    |             | 7.668217983 |             | 14.72455916    |             |        |
| 10.39255127                         | 20.12294101                                       |         |             | 18.7195563  |             | 23.65321726    |             |        |
| ENSG00000137509                     | 1471.655252                                       |         |             | 1333.882692 |             | 1799.149086    |             |        |
| 836.8136589                         | 976.916209                                        |         |             | 995.9337523 |             | 1534.895676    |             |        |
| 936.5545401                         | 0.712581522                                       |         |             | 2.29E-05    |             | 0.000489179    |             | PRCP   |
| 11                                  | 82823502                                          |         |             | 82970584    |             | -              | 12798       |        |
| protein_coding                      | prolylcarboxypeptidase [Source:HGNC               |         |             |             |             |                |             |        |
| Symbol;Acc:HGNC:9344]               |                                                   |         |             | -           | 1272        | 1439           | 1840        | 833    |
| 1015                                | 5.43550273                                        |         |             | 4.957384974 |             | 6.660060479    |             | 1069   |

|                                    |                                                  |             |             |             |      |             |
|------------------------------------|--------------------------------------------------|-------------|-------------|-------------|------|-------------|
| 3.147053399                        | 3.639939767                                      | 3.702286064 |             |             |      |             |
| ENSG00000125352                    | 345.931541                                       | 469.0372773 | 324.6290742 |             |      |             |
| 631.8797017                        | 744.7958001                                      | 723.1558378 | 379.8659642 |             |      |             |
| 699.9437799                        | -0.880787179                                     | 2.30E-05    | 0.000491603 |             |      |             |
| RNF113A X                          | 119870475                                        | 119871827   | -           | 1353        |      |             |
| protein_coding                     | ring finger protein 113A [Source:HGNC            |             |             |             |      |             |
| Symbol;Acc:HGNC:12974]             | -                                                | 299         | 506         | 332         | 629  | 815         |
| 737                                | 12.08559689                                      | 16.48870994 | 11.36691842 |             |      |             |
| 22.47781359                        | 26.24934131                                      | 25.42820635 |             |             |      |             |
| ENSG00000143195                    | 590.0504546                                      | 303.1130231 | 603.3016228 |             |      |             |
| 258.1766031                        | 142.5621409                                      | 216.8486298 | 498.8217001 |             |      |             |
| 205.8624579                        | 1.27698402                                       | 2.31E-05    | 0.000492077 |             |      | ILDR2       |
| 1                                  | 166895711                                        | 166975482   | -           | 13884       |      |             |
| protein_coding                     | immunoglobulin like domain containing receptor 2 |             |             |             |      |             |
| [Source:HGNC                       | Symbol;Acc:HGNC:18131]                           | -           | 510         | 327         |      | 617         |
| 257                                | 156                                              | 221         | 2.008862833 | 1.038405801 |      |             |
| 2.05860496                         | 0.894993198                                      | 0.489630644 | 0.743059694 |             |      |             |
| ENSG00000153956                    | 742.7693958                                      | 581.1983653 | 661.9695277 |             |      |             |
| 410.8724928                        | 316.1955176                                      | 369.9182508 | 661.9790963 |             |      |             |
| 365.6620871                        | 0.85609725                                       | 2.32E-05    | 0.000493826 |             |      |             |
| CACNA2D1                           | 7                                                | 81946444    | 82443798    | -           |      | 9010        |
| protein_coding                     | calcium voltage-gated channel auxiliary          |             |             |             |      |             |
| subunit alpha2delta 1 [Source:HGNC | Symbol;Acc:HGNC:1399]                            | -           |             |             |      |             |
| 642                                | 627                                              | 677         | 409         | 346         | 377  | 3.896771586 |
| 3.068150845                        | 3.480697918                                      | 2.194824167 | 1.673439075 |             |      |             |
| 1.953271418                        |                                                  |             |             |             |      |             |
| ENSG00000087995                    | 1140.764212                                      | 1139.222952 | 978.7762146 |             |      |             |
| 1675.636474                        | 1766.491143                                      | 1581.719417 | 1086.25446  |             |      |             |
| 1674.615678                        | -0.624715333                                     | 2.36E-05    | 0.000501741 |             |      |             |
| METTL2A 17                         | 62423867                                         | 62450822    | +           | 3843        |      |             |
| protein_coding                     | methyltransferase like 2A [Source:HGNC           |             |             |             |      |             |
| Symbol;Acc:HGNC:25755]             | -                                                | 986         | 1229        | 1001        | 1668 | 1933        |
| 1612                               | 14.03140768                                      | 14.09988129 | 12.06607857 |             |      |             |
| 20.98586517                        | 21.91896622                                      | 19.58126247 |             |             |      |             |
| ENSG00000170962                    | 141.1493244                                      | 61.1787753  | 131.0249878 |             |      |             |
| 28.12819022                        | 29.24351608                                      | 22.56795695 | 111.1176958 |             |      |             |
| 26.64655441                        | 2.057585301                                      | 2.40E-05    | 0.000510163 |             |      | PDGFD       |
| 11                                 | 103907186                                        | 104164379   | -           | 4266        |      |             |
| protein_coding                     | platelet derived growth factor D [Source:HGNC    |             |             |             |      |             |
| Symbol;Acc:HGNC:30620]             | -                                                | 122         | 66          | 134         | 28   | 32          |
| 23                                 | 1.563988993                                      | 0.682114124 | 1.455078431 |             |      |             |
| 0.317349923                        | 0.32687953                                       | 0.251682501 |             |             |      |             |
| ENSG00000175602                    | 2763.981443                                      | 4710.765698 | 3776.257483 |             |      |             |
| 5945.093918                        | 6054.321688                                      | 6617.317463 | 3750.334875 |             |      |             |
| 6205.57769                         | -0.726183246                                     | 2.41E-05    | 0.0005108   |             |      |             |
| CCDC85B 11                         | 65890112                                         | 65891635    | +           | 1524        |      |             |
| protein_coding                     | coiled-coil domain containing 85B [Source:HGNC   |             |             |             |      |             |
| Symbol;Acc:HGNC:24926]             | -                                                | 2389        | 5082        | 3862        | 5918 | 6625        |
| 6744                               | 85.72863237                                      | 147.0224487 | 117.3896366 |             |      |             |
| 187.7548699                        | 189.4346908                                      | 206.5754134 |             |             |      |             |

|                                     |                                                      |             |             |        |
|-------------------------------------|------------------------------------------------------|-------------|-------------|--------|
| ENSG00000127483                     | 5932.899473                                          | 5305.86833  | 5430.692403 |        |
| 3724.976047                         | 3638.076172                                          | 4180.959328 | 5556.486736 |        |
| 3848.003849                         | 0.529984627                                          | 2.43E-05    | 0.000515279 | HP1BP3 |
| 1                                   | 20742661                                             | 20787323    | - 7442      |        |
| protein_coding                      | heterochromatin protein 1 binding protein 3          |             |             |        |
| [Source:HGNC Symbol;Acc:HGNC:24973] | -                                                    |             | 5128 5724   | 5554   |
| 3708                                | 3981 4261                                            | 37.68365886 | 33.91125928 |        |
| 34.57153521                         | 24.090803                                            | 23.31101102 | 26.72808873 |        |
| ENSG00000103043                     | 1959.893079                                          | 2319.231754 | 2004.486753 |        |
| 3762.145441                         | 2935.317926                                          | 3021.162584 | 2094.537195 |        |
| 3239.541984                         | -0.628822431                                         | 2.45E-05    | 0.000516775 | VAC14  |
| 16                                  | 70687439                                             | 70801161    | - 8276      |        |
| protein_coding                      | "Vac14, PIKFYVE complex component [Source:HGNC       |             |             |        |
| Symbol;Acc:HGNC:25507]"             | -                                                    | 1694 2502   | 2050 3745   | 3212   |
| 3079                                | 11.19406016                                          | 13.32909862 | 11.47455455 |        |
| 21.87925634                         | 16.91272753                                          | 17.36741743 |             |        |
| ENSG00000143621                     | 7241.423128                                          | 6790.844058 | 7619.983057 |        |
| 5252.939523                         | 5007.038268                                          | 5114.095287 | 7217.416748 |        |
| 5124.691026                         | 0.49401326                                           | 2.45E-05    | 0.000516775 | ILF2   |
| 1                                   | 153661788                                            | 153671048   | - 2281      |        |
| protein_coding                      | interleukin enhancer binding factor 2 [Source:HGNC   |             |             |        |
| Symbol;Acc:HGNC:6037]               | -                                                    | 6259 7326   | 7793 5229   | 5479   |
| 5212                                | 150.0632607                                          | 141.6040214 | 158.2638939 |        |
| 110.8395038                         | 104.6729859                                          | 106.6657908 |             |        |
| ENSG00000124201                     | 1759.738709                                          | 1643.484373 | 1500.920569 |        |
| 2756.562641                         | 2480.215707                                          | 2243.058678 | 1634.71455  |        |
| 2493.279009                         | -0.609229046                                         | 2.46E-05    | 0.000518518 | ZNFX1  |
| 20                                  | 49237946                                             | 49278426    | - 9340      |        |
| protein_coding                      | zinc finger NFX1-type containing 1 [Source:HGNC      |             |             |        |
| Symbol;Acc:HGNC:29271]              | -                                                    | 1521 1773   | 1535 2744   | 2714   |
| 2286                                | 8.905884338                                          | 8.369428766 | 7.61314251  |        |
| 14.20490872                         | 12.66256142                                          | 11.4255045  |             |        |
| ENSG00000120868                     | 480.1390954                                          | 376.3421632 | 514.3219669 |        |
| 134.6134818                         | 267.7609441                                          | 208.9989056 | 456.9344085 |        |
| 203.7911105                         | 1.163316772                                          | 2.47E-05    | 0.000518518 | APAF1  |
| 12                                  | 98645141                                             | 98735433    | + 7908      |        |
| protein_coding                      | apoptotic peptidase activating factor 1 [Source:HGNC |             |             |        |
| Symbol;Acc:HGNC:576]                | -                                                    | 415 406     | 526 134     | 293    |
| 213                                 | 2.869962016                                          | 2.263566881 | 3.081211707 |        |
| 0.819293207                         | 1.614579959                                          | 1.257358085 |             |        |
| ENSG00000167601                     | 6754.342263                                          | 8419.497212 | 12315.37105 |        |
| 1990.069458                         | 2601.759071                                          | 4012.190259 | 9163.070176 |        |
| 2868.006263                         | 1.675800112                                          | 2.47E-05    | 0.000518518 | AXL    |
| 19                                  | 41219203                                             | 41261766    | + 5154      |        |
| protein_coding                      | AXL receptor tyrosine kinase [Source:HGNC            |             |             |        |
| Symbol;Acc:HGNC:905]                | -                                                    | 5838 9083   | 12595 1981  | 2847   |
| 4089                                | 61.94615989                                          | 77.6996134  | 113.2025509 |        |
| 18.58408905                         | 24.07141668                                          | 37.03554434 |             |        |
| ENSG00000165072                     | 170.0733663                                          | 106.5993812 | 253.2497898 |        |
| 13.05951689                         | 53.00387289                                          | 56.91050013 | 176.6408458 |        |

|                                     |                                                     |             |                  |        |
|-------------------------------------|-----------------------------------------------------|-------------|------------------|--------|
| 40.99129664                         | 2.104996843                                         | 2.47E-05    | 0.000518662      | MAMDC2 |
| 9                                   | 70043581                                            | 70226970    | + 3854           |        |
| protein_coding                      | MAM domain containing 2 [Source:HGNC                |             |                  |        |
| Symbol;Acc:HGNC:23673]              | -                                                   | 147 115     | 259 13           | 58     |
| 58                                  | 2.085932915                                         | 1.315588559 | 3.113081636      |        |
| 0.163092075                         | 0.655805238                                         | 0.702525866 |                  |        |
| ENSG00000164308                     | 1210.181913                                         | 888.0191929 | 1512.65415       |        |
| 816.7220945                         | 477.034856                                          | 510.2320701 | 1203.618419      |        |
| 601.3296735                         | 1.001442159                                         | 2.47E-05    | 0.000518662      | ERAP2  |
| 5                                   | 96875939                                            | 96919716    | + 7422           |        |
| protein_coding                      | endoplasmic reticulum aminopeptidase 2 [Source:HGNC |             |                  |        |
| Symbol;Acc:HGNC:29499]              | -                                                   | 1046 958    | 1547 813         | 522    |
| 520                                 | 7.707356495                                         | 5.690868063 | 9.655434443      |        |
| 5.296278476                         | 3.064842425                                         | 3.270607509 |                  |        |
| ENSG00000154319                     | 77.51643227                                         | 71.37523785 | 329.5180662      |        |
| 48.21975466                         | 18.27719755                                         | 9.812155195 | 159.4699121      |        |
| 25.43636913                         | 2.651538036                                         | 2.50E-05    | 0.000522964      |        |
| FAM167A 8                           | 11421463                                            | 11475908    | - 5076           |        |
| protein_coding                      | family with sequence similarity 167 member A        |             |                  |        |
| [Source:HGNC Symbol;Acc:HGNC:15549] | -                                                   | 67 77       |                  | 337    |
| 48                                  | 20 10                                               | 0.721851564 | 0.66881048       |        |
| 3.075464676                         | 0.45721539                                          | 0.171698689 | 0.091965391      |        |
| ENSG00000255874                     | 150.4050178                                         | 88.06035838 | 127.1137941      |        |
| 40.18312888                         | 16.44947779                                         | 35.3237587  | 121.8597234      |        |
| 30.65212179                         | 1.993200472                                         | 2.53E-05    | 0.000528681      |        |
| LINC00346                           | 13 110863987                                        | 110870251   | -                | 6265   |
| lincRNA                             | long intergenic non-protein coding RNA 346          |             |                  |        |
| [Source:HGNC Symbol;Acc:HGNC:27492] | -                                                   | 130 95      |                  | 130    |
| 40                                  | 18 36                                               | 1.134793892 | 0.668553994      |        |
| 0.961224281                         | 0.30870249                                          | 0.125201643 | 0.268242422      |        |
| ENSG00000261786                     | 240.6480285                                         | 215.0526647 | 268.8945644      |        |
| 59.2701151                          | 87.73054823                                         | 125.5955865 | 241.5317526      |        |
| 90.86541661                         | 1.409920594                                         | 2.54E-05    | 0.000530275      |        |
| AC006058.1                          | 3 44117299                                          | 44122365    | + 5067           |        |
| lincRNA                             | novel transcript                                    |             |                  |        |
| 59                                  | 96 128                                              | 2.244952433 | 2.01869654       | 275    |
| 2.514109826                         | 0.56299213                                          | 0.82561757  | 1.179247872      |        |
| ENSG00000101160                     | 2545.315687                                         | 3164.611195 | 3918.038254      |        |
| 1701.755508                         | 2083.600521                                         | 2065.458668 | 3209.321712      |        |
| 1950.271566                         | 0.718764558                                         | 2.56E-05    | 0.000533789      | CTSZ   |
| 20                                  | 58995185                                            | 59007247    | - 2038           |        |
| protein_coding                      | cathepsin Z [Source:HGNC Symbol;Acc:HGNC:2547]      |             |                  | -      |
| 2200                                | 3414 4007                                           | 1694 2280   | 2105 59.03549566 |        |
| 73.85727755                         | 91.07886681                                         | 40.18930008 | 48.75164395      |        |
| 48.2163084                          |                                                     |             |                  |        |
| ENSG00000112893                     | 769.3795144                                         | 688.7246976 | 820.3728712      |        |
| 464.1151386                         | 362.8023713                                         | 472.9458804 | 759.4923611      |        |
| 433.2877968                         | 0.810056082                                         | 2.56E-05    | 0.000534045      | MAN2A1 |
| 5                                   | 109689366                                           | 109869625   | + 11815          |        |
| protein_coding                      | mannosidase alpha class 2A member 1 [Source:HGNC    |             |                  |        |

|                         |                                                     |              |             |             |      |        |
|-------------------------|-----------------------------------------------------|--------------|-------------|-------------|------|--------|
| Symbol;Acc:HGNC:6824]   | -                                                   | 665          | 743         | 839         | 462  | 397    |
| 482                     | 3.078099342                                         | 2.772611663  |             | 3.289506059 |      |        |
| 1.890642717             | 1.464250492                                         | 1.904405154  |             |             |      |        |
| ENSG00000160469         | 177.0151364                                         | 269.742782   |             | 192.626288  |      |        |
| 477.1746555             | 371.0271102                                         | 479.814389   |             | 213.1280688 |      |        |
| 442.6720516             | -1.052075587                                        | 2.58E-05     |             | 0.000535848 |      | BRSK1  |
| 19                      | 55282072                                            | 55312533     |             | +           | 3841 |        |
| protein_coding          | BR serine/threonine kinase 1                        | [Source:HGNC |             |             |      |        |
| Symbol;Acc:HGNC:18994]  | -                                                   | 153          | 291         | 197         | 475  | 406    |
| 489                     | 2.178421108                                         | 3.340278205  |             | 2.375879306 |      |        |
| 5.979302411             | 4.606173836                                         | 5.943066472  |             |             |      |        |
| ENSG00000120539         | 732.3567407                                         | 565.4401959  |             | 680.5476976 |      |        |
| 138.6317946             | 390.2181677                                         | 303.1955955  |             | 659.4482114 |      |        |
| 277.3485193             | 1.248192937                                         | 2.62E-05     |             | 0.000544184 |      | MASTL  |
| 10                      | 27154824                                            | 27186924     |             | +           | 3631 |        |
| protein_coding          | microtubule associated serine/threonine kinase like | [Source:HGNC |             |             |      |        |
| Symbol;Acc:HGNC:19042]  | -                                                   |              |             | 633         | 610  | 696    |
| 138                     | 427                                                 | 309          | 9.533934718 | 7.406918125 |      |        |
| 8.879437332             | 1.837612998                                         | 5.124602969  |             | 3.972631358 |      |        |
| ENSG00000078804         | 686.0782737                                         | 596.0295836  |             | 733.3488121 |      |        |
| 382.7443026             | 350.0083331                                         | 417.0165958  |             | 671.8188898 |      |        |
| 383.2564105             | 0.80977004                                          | 2.62E-05     |             | 0.000544213 |      |        |
| TP53INP2                | 20                                                  | 34704290     | 34713439    | +           |      | 4228   |
| protein_coding          | tumor protein p53 inducible nuclear protein 2       | [Source:HGNC |             |             |      |        |
| Symbol;Acc:HGNC:16104]  | -                                                   |              |             | 593         | 643  | 750    |
| 381                     | 383                                                 | 425          | 7.670336685 | 6.705172455 |      |        |
| 8.217292392             | 4.357036654                                         | 3.947502312  |             | 4.692453604 |      |        |
| ENSG00000185585         | 652.5263851                                         | 480.160691   |             | 962.1536415 |      |        |
| 308.4055142             | 310.7123583                                         | 385.6176992  |             | 698.2802392 |      |        |
| 334.9118572             | 1.060053132                                         | 2.66E-05     |             | 0.000550867 |      |        |
| OLFML2A                 | 9                                                   | 124777158    | 124814885   | +           | 6746 |        |
| protein_coding          | olfactomedin like 2A                                | [Source:HGNC |             |             |      |        |
| Symbol;Acc:HGNC:27270]  | -                                                   | 564          | 518         | 984         | 307  | 340    |
| 393                     | 4.572223799                                         | 3.385457615  |             | 6.756957968 |      |        |
| 2.200357536             | 2.196297554                                         | 2.719519952  |             |             |      |        |
| ENSG00000139722         | 846.8959466                                         | 944.5632125  |             | 865.3515983 |      |        |
| 1342.116505             | 1334.235421                                         | 1413.931564  |             | 885.6035858 |      |        |
| 1363.42783              | -0.62210202                                         | 2.67E-05     |             | 0.000553168 |      | VPS37B |
| 12                      | 122865328                                           | 122896444    |             | -           | 5953 |        |
| protein_coding          | "VPS37B, ESCRT-I subunit                            | [Source:HGNC |             |             |      |        |
| Symbol;Acc:HGNC:25754]" | -                                                   | 732          | 1019        | 885         | 1336 | 1460   |
| 1441                    | 6.724653497                                         | 7.546963671  |             | 6.886679059 |      |        |
| 10.85105069             | 10.6874863                                          | 11.29988787  |             |             |      |        |
| ENSG00000203666         | 415.3492416                                         | 334.6293618  |             | 484.9880144 |      |        |
| 216.988896              | 163.5809181                                         | 215.8674143  |             | 411.6555393 |      |        |
| 198.8124094             | 1.050469179                                         | 2.70E-05     |             | 0.000558621 |      | EFCAB2 |
| 1                       | 244969705                                           | 245127164    |             | +           | 8607 |        |
| protein_coding          | EF-hand calcium binding domain 2                    | [Source:HGNC |             |             |      |        |
| Symbol;Acc:HGNC:28166]  | -                                                   | 359          | 361         | 496         | 216  | 179    |
| 220                     | 2.281063411                                         | 1.8492233    |             | 2.669514778 |      |        |

|                                     |                                                     |             |             |             |                |             |  |
|-------------------------------------|-----------------------------------------------------|-------------|-------------|-------------|----------------|-------------|--|
| 1.213397692                         | 0.906274636                                         | 1.19321008  |             |             |                |             |  |
| ENSG00000166173                     | 817.9719047                                         | 1075.263323 | 731.3932153 |             |                |             |  |
| 1405.404933                         | 1704.348671                                         | 1363.889572 | 874.8761478 |             |                |             |  |
| 1491.214392                         | -0.768961218                                        | 2.72E-05    | 0.000560756 | LARP6       |                |             |  |
| 15                                  | 70829130                                            | 70854159    | -           | 5554        |                |             |  |
| protein_coding                      | La ribonucleoprotein domain family member 6         |             |             |             |                |             |  |
| [Source:HGNC Symbol;Acc:HGNC:24012] | -                                                   | 707         | 1160        | 748         |                |             |  |
| 1399                                | 1865                                                | 1390        | 6.961586939 | 9.208440193 |                |             |  |
| 6.238758553                         | 12.17903996                                         | 14.63293888 | 11.68301571 |             |                |             |  |
| ENSG00000099821                     | 2391.439784                                         | 3263.794967 | 2735.879968 |             |                |             |  |
| 4812.934262                         | 4026.46662                                          | 4148.579216 | 2797.03824  |             |                |             |  |
| 4329.326699                         | -0.629829707                                        | 2.72E-05    | 0.000561251 | POLRMT      |                |             |  |
| 19                                  | 617224                                              | 633604      | -           | 5124        | protein_coding | RNA         |  |
| polymerase mitochondrial            | [Source:HGNC Symbol;Acc:HGNC:9200]                  |             |             | -           |                |             |  |
| 2067                                | 3521                                                | 2798        | 4791        | 4406        | 4228           | 22.06104438 |  |
| 30.29638855                         | 25.2953705                                          | 45.20830937 | 37.47088664 |             |                |             |  |
| 38.51872413                         |                                                     |             |             |             |                |             |  |
| ENSG00000183876                     | 129.5797077                                         | 164.0703519 | 302.1397106 |             |                |             |  |
| 63.28842799                         | 28.3296562                                          | 75.553595   | 198.5965901 |             |                |             |  |
| 55.72389306                         | 1.836625228                                         | 2.76E-05    | 0.000568568 | ARSI        |                |             |  |
| 5                                   | 150296343                                           | 150339307   | -           | 3269        |                |             |  |
| protein_coding                      | arylsulfatase family member I [Source:HGNC          |             |             |             |                |             |  |
| Symbol;Acc:HGNC:32521]              | -                                                   | 112         | 177         | 309         | 63             | 31          |  |
| 77                                  | 1.873690327                                         | 2.387219227 | 4.378708302 |             |                |             |  |
| 0.931808881                         | 0.413242872                                         | 1.099567362 |             |             |                |             |  |
| ENSG00000160957                     | 937.1389573                                         | 1240.260626 | 1602.611604 |             |                |             |  |
| 592.701151                          | 551.971366                                          | 840.9017002 | 1260.003729 |             |                |             |  |
| 661.8580724                         | 0.929499732                                         | 2.82E-05    | 0.000579228 | RECQL4      |                |             |  |
| 8                                   | 144511288                                           | 144517845   | -           | 4236        |                |             |  |
| protein_coding                      | RecQ like helicase 4 [Source:HGNC                   |             |             |             |                |             |  |
| Symbol;Acc:HGNC:9949]               | -                                                   | 810         | 1338        | 1639        | 590            | 604         |  |
| 857                                 | 10.45740144                                         | 13.92624784 | 17.92360886 |             |                |             |  |
| 6.734374698                         | 6.21354696                                          | 9.444324622 |             |             |                |             |  |
| ENSG00000263513                     | 99.49870411                                         | 131.627062  | 130.0471893 |             |                |             |  |
| 29.13276844                         | 46.60685375                                         | 18.64309487 | 120.3909852 |             |                |             |  |
| 31.46090569                         | 1.933915556                                         | 2.82E-05    | 0.000579228 | FAM72C      |                |             |  |
| 1                                   | 143955364                                           | 143971965   | -           | 2297        |                |             |  |
| protein_coding                      | family with sequence similarity 72 member C         |             |             |             |                |             |  |
| [Source:HGNC Symbol;Acc:HGNC:30602] | -                                                   | 86          | 142         | 133         |                |             |  |
| 29                                  | 51                                                  | 19          | 2.047538935 | 2.725594895 |                |             |  |
| 2.682212002                         | 0.610433303                                         | 0.967537438 | 0.386134531 |             |                |             |  |
| ENSG0000008083                      | 443.1163218                                         | 473.672033  | 374.4967934 |             |                |             |  |
| 983.4820794                         | 800.5412526                                         | 617.1845617 | 430.4283827 |             |                |             |  |
| 800.4026312                         | -0.894857029                                        | 2.84E-05    | 0.000581228 | JARID2      |                |             |  |
| 6                                   | 15246296                                            | 15522040    | +           | 6015        |                |             |  |
| protein_coding                      | jumonji and AT-rich interaction domain containing 2 |             |             |             |                |             |  |
| [Source:HGNC Symbol;Acc:HGNC:6196]  | ARID                                                | 383         | 511         | 383         |                |             |  |
| 979                                 | 876                                                 | 629         | 3.482233226 | 3.745581285 |                |             |  |
| 2.949616799                         | 7.869520601                                         | 6.346394607 | 4.881587178 |             |                |             |  |
| ENSG00000077232                     | 2658.697931                                         | 2215.413227 | 2433.740258 |             |                |             |  |



|                                      |                                                        |             |             |                |
|--------------------------------------|--------------------------------------------------------|-------------|-------------|----------------|
| 1799.199596                          | 1441.157027                                            | 1493.410021 | 2435.950472 |                |
| 1577.922214                          | 0.626371804                                            | 2.88E-05    | 0.000589404 |                |
| DNAJC10 2                            | 182716041                                              | 182794464   | + 21835     |                |
| protein_coding                       | DnaJ heat shock protein family (Hsp40) member C10      |             |             |                |
| [Source:HGNC Symbol;Acc:HGNC:24637]  | -                                                      | 2298        | 2390        | 2489           |
| 1791                                 | 1577                                                   | 1522        | 5.755612417 | 4.825903825    |
| 5.280489169                          | 3.965916865                                            | 3.147292413 | 3.253924651 |                |
| ENSG00000186472                      | 345.931541                                             | 357.8031404 | 116.3580115 |                |
| 1273.805186                          | 1644.947779                                            | 914.4928641 | 273.364231  |                |
| 1277.74861                           | -2.225015614                                           | 2.93E-05    | 0.000598072 | PCL0           |
| 7                                    | 82754013                                               | 83162930    | - 22873     |                |
| protein_coding                       | piccolo presynaptic cytomatrix protein [Source:HGNC    |             |             |                |
| Symbol;Acc:HGNC:13406]               | -                                                      | 299         | 386         | 119 1268 1800  |
| 932                                  | 0.714895842                                            | 0.744043167 | 0.24100513  |                |
| 2.680385995                          | 3.429319689                                            | 1.902123969 |             |                |
| ENSG00000120833                      | 93.71389573                                            | 101.9646255 | 72.3570828  |                |
| 20.09156444                          | 21.93263706                                            | 23.54917247 | 89.34520134 |                |
| 21.85779132                          | 2.030943959                                            | 2.95E-05    | 0.000602585 | SOCS2          |
| 12                                   | 93569814                                               | 93583487    | + 6776      |                |
| protein_coding                       | suppressor of cytokine signaling 2 [Source:HGNC        |             |             |                |
| Symbol;Acc:HGNC:19382]               | -                                                      | 81          | 110         | 74 20 24       |
| 24                                   | 0.65374192                                             | 0.715736633 | 0.505895456 |                |
| 0.14271112                           | 0.154346378                                            | 0.165342264 |             |                |
| ENSG00000136997                      | 1183.571794                                            | 1447.897682 | 1068.733669 |                |
| 2000.11524                           | 2171.331069                                            | 1766.187935 | 1233.401048 |                |
| 1979.211415                          | -0.682040625                                           | 2.98E-05    | 0.000605894 | MYC            |
| 8                                    | 127735434                                              | 127741434   | + 3001      |                |
| protein_coding                       | "MYC proto-oncogene, bHLH transcription factor         |             |             |                |
| [Source:HGNC Symbol;Acc:HGNC:7553]"  | bHLH                                                   | 1023        | 1562        | 1093           |
| 1991                                 | 2376                                                   | 1800        | 18.64250855 | 22.94821933    |
| 16.87161367                          | 32.07794077                                            | 34.50158434 | 27.99964632 |                |
| ENSG00000134369                      | 4573.469504                                            | 3098.797664 | 5076.729377 |                |
| 2680.214696                          | 2513.114663                                            | 2570.784661 | 4249.665515 |                |
| 2588.038007                          | 0.715367459                                            | 2.98E-05    | 0.000605894 | NAV1           |
| 1                                    | 201622885                                              | 201826969   | + 22453     |                |
| protein_coding                       | neuron navigator 1 [Source:HGNC Symbol;Acc:HGNC:15989] |             |             |                |
| -                                    | 3953                                                   | 3343        | 5192        | 2668 2750 2620 |
| 9.628245398                          | 6.564413927                                            | 10.71180759 | 5.745299396 |                |
| 5.337242249                          | 5.447195354                                            |             |             |                |
| ENSG00000198355                      | 983.4174244                                            | 1827.94765  | 1305.360886 |                |
| 2451.170862                          | 2372.380242                                            | 2400.053161 | 1372.241987 |                |
| 2407.868088                          | -0.810345117                                           | 2.98E-05    | 0.000606545 | PIM3           |
| 22                                   | 49960513                                               | 49964080    | + 2461      |                |
| protein_coding                       | "Pim-3 proto-oncogene, serine/threonine kinase         |             |             |                |
| [Source:HGNC Symbol;Acc:HGNC:19310]" | -                                                      | 850         | 1972        | 1335           |
| 2440                                 | 2596                                                   | 2446        | 18.88869808 | 35.32882999    |
| 25.12882071                          | 47.9379468                                             | 45.96758334 | 46.39710412 |                |
| ENSG00000266028                      | 1333.976812                                            | 1221.721604 | 1712.125027 |                |
| 707.2230683                          | 874.5639027                                            | 933.135959  | 1422.607814 |                |
| 838.3076433                          | 0.762886826                                            | 3.02E-05    | 0.000612304 | SRGAP2         |

|                        |                                             |                        |              |                |     |
|------------------------|---------------------------------------------|------------------------|--------------|----------------|-----|
| 1                      | 206203345                                   | 206464443              | +            | 15675          |     |
| protein_coding         | SLIT-ROBO Rho GTPase activating             | protein 2              | [Source:HGNC |                |     |
| Symbol;Acc:HGNC:19751] | -                                           | 1153 1318              | 1751 704     | 957            |     |
| 951                    | 4.022689117                                 | 3.707164168            | 5.174650856  |                |     |
| 2.171532463            | 2.660498302                                 | 2.832167946            |              |                |     |
| ENSG00000166825        | 1037.794623                                 | 807.3744437            | 1197.80306   |                |     |
| 398.8175541            | 545.5743468                                 | 665.2641222            | 1014.324042  |                |     |
| 536.5520077            | 0.918348139                                 | 3.03E-05               | 0.000612765  | ANPEP          |     |
| 15                     | 89784889                                    | 89815401               | -            | 4871           |     |
| protein_coding         | "alanyl aminopeptidase, membrane            | [Source:HGNC           |              |                |     |
| Symbol;Acc:HGNC:500]"  | -                                           | 897 871                | 1225 397     | 597            |     |
| 678                    | 10.07091722                                 | 7.883770684            | 11.64985218  |                |     |
| 3.940701994            | 5.340904338                                 | 6.497669241            |              |                |     |
| ENSG00000170522        | 1065.561703                                 | 924.1702874            | 873.1739856  |                |     |
| 442.0144177            | 646.0989333                                 | 550.4619064            | 954.3019921  |                |     |
| 546.1917525            | 0.804065846                                 | 3.03E-05               | 0.000612765  | ELOVL6         |     |
| 4                      | 110045846                                   | 110199199              | -            | 7297           |     |
| protein_coding         | ELOVL fatty acid elongase 6                 | [Source:HGNC           |              |                |     |
| Symbol;Acc:HGNC:15829] | -                                           | 921 997                | 893 440      | 707            |     |
| 561                    | 6.902556921                                 | 6.023997321            | 5.669040615  |                |     |
| 2.91547651             | 4.222150067                                 | 3.588926389            |              |                |     |
| ENSG00000116863        | 1368.685662                                 | 1876.149109            | 1675.946485  |                |     |
| 2527.518807            | 2337.653566                                 | 3033.918386            | 1640.260419  |                |     |
| 2633.030253            | -0.682178675                                | 3.03E-05               | 0.000612765  |                |     |
| ADPRHL2 1              | 36088875                                    | 36093932               | +            | 1668           |     |
| protein_coding         | ADP-ribosylhydrolyase like 2                | [Source:HGNC           |              |                |     |
| Symbol;Acc:HGNC:21304] | -                                           | 1183 2024              | 1714 2516    | 2558           |     |
| 3092                   | 38.7867518                                  | 53.49933945            | 47.60112612  |                |     |
| 72.93161101            | 66.82871209                                 | 86.53453709            |              |                |     |
| ENSG00000179431        | 686.0782737                                 | 1127.172587            | 1106.867807  |                |     |
| 1592.256482            | 1741.816926                                 | 1745.582409            | 973.3728894  |                |     |
| 1693.218606            | -0.797612505                                | 3.03E-05               | 0.000612765  | FJX1           |     |
| 11                     | 35618419                                    | 35620868               | +            | 2450           |     |
| protein_coding         | four jointed box 1                          | [Source:HGNC           |              |                |     |
| Symbol;Acc:HGNC:17166] | -                                           | 593 1216               | 1132 1585    | 1906 1779      |     |
| 13.23680959            | 21.88272731                                 | 21.4034015             | 31.27983105  |                |     |
| 33.90122642            | 33.89658135                                 |                        |              |                |     |
| ENSG00000006576        | 1900.888033                                 | 1718.567415            | 1922.351686  |                |     |
| 1044.761351            | 1358.909638                                 | 1137.228787            | 1847.269045  |                |     |
| 1180.299925            | 0.645806814                                 | 3.08E-05               | 0.000621244  | PHTF2          |     |
| 7                      | 77798792                                    | 77957503               | +            | 8646           |     |
| protein_coding         | putative homeodomain transcription factor 2 | [Source:HGNC           |              |                |     |
| Symbol;Acc:HGNC:13411] | -                                           |                        | 1643 1854    | 1966           |     |
| 1040                   | 1487 1159                                   | 10.39242849            | 9.454279919  |                |     |
| 10.53345243            | 5.81593206                                  | 7.494701408            | 6.257692821  |                |     |
| ENSG00000167671        | 2033.938626                                 | 2810.515859            | 2238.180575  |                |     |
| 3287.984521            | 3766.930415                                 | 4056.344957            | 2360.878353  |                |     |
| 3703.753298            | -0.649294078                                | 3.14E-05               | 0.000632417  | UBXN6          |     |
| 19                     | 4444999 4457822                             | -                      | 5275         | protein_coding | UBX |
| domain protein 6       | [Source:HGNC                                | Symbol;Acc:HGNC:14928] | -            | 1758           |     |

|                        |                                                  |             |             |             |                |             |
|------------------------|--------------------------------------------------|-------------|-------------|-------------|----------------|-------------|
| 3032                   | 2289                                             | 3273        | 4122        | 4134        | 18.22598966    |             |
| 25.34198859            | 20.10137587                                      |             | 30.00024199 |             | 34.05211734    |             |
| 36.58424057            |                                                  |             |             |             |                |             |
| ENSG00000110031        | 1189.356603                                      |             | 1065.066861 |             | 708.9038517    |             |
| 1852.442241            | 1835.030634                                      |             | 1506.165822 |             | 987.7757717    |             |
| 1731.212899            | -0.810126392                                     |             | 3.15E-05    |             | 0.000633334    | LPXN        |
| 11                     | 58526871                                         |             | 58578220    |             | - 2467         |             |
| protein_coding         | leupaxin [Source:HGNC Symbol;Acc:HGNC:14061]     |             |             |             | -              |             |
| 1028                   | 1149                                             | 725         | 1844        | 2008        | 1535           | 22.78865418 |
| 20.53453332            |                                                  | 13.61354756 |             | 36.14040239 |                | 35.46934403 |
| 29.04592865            |                                                  |             |             |             |                |             |
| ENSG00000103316        | 34.70885027                                      |             | 87.13340724 |             | 33.24514615    |             |
| 246.1216644            | 213.8432113                                      |             | 111.8585692 |             | 51.69580122    |             |
| 190.607815             | -1.876889905                                     |             | 3.17E-05    |             | 0.000637736    | CRYM        |
| 16                     | 21238874                                         |             | 21303083    |             | - 3782         |             |
| protein_coding         | crystallin mu [Source:HGNC Symbol;Acc:HGNC:2418] |             |             |             |                |             |
| -                      | 30                                               | 94          | 34          | 245         | 234            | 114         |
| 0.43380489             | 1.095822686                                      |             | 0.416447106 |             | 3.132173251    |             |
| 2.69620513             | 1.407114255                                      |             |             |             |                |             |
| ENSG00000169957        | 584.2656462                                      |             | 769.3694469 |             | 869.262792     |             |
| 1334.079879            | 1184.362401                                      |             | 1230.444261 |             | 740.9659617    |             |
| 1249.628847            | -0.752861161                                     |             | 3.19E-05    |             | 0.000639032    | ZNF768      |
| 16                     | 30524001                                         |             | 30526821    |             | - 2395         |             |
| protein_coding         | zinc finger protein 768 [Source:HGNC             |             |             |             |                |             |
| Symbol;Acc:HGNC:26273] | zf-C2H2                                          | 505         | 830         | 889         | 1328           | 1296        |
| 1254                   | 11.53136113                                      |             | 15.27940817 |             | 17.19486217    |             |
| 26.80981232            | 23.58077539                                      |             | 24.442074   |             |                |             |
| ENSG00000106012        | 1066.718665                                      |             | 1116.049174 |             | 1309.272079    |             |
| 2129.705831            | 1626.670582                                      |             | 1809.361418 |             | 1164.013306    |             |
| 1855.245943            | -0.672061244                                     |             | 3.21E-05    |             | 0.00064232     | IQCE        |
| 7                      | 2558972                                          | 2614734     | +           | 9240        | protein_coding | IQ          |
| motif containing       | E [Source:HGNC Symbol;Acc:HGNC:29171]            |             |             |             | -              | 922         |
| 1204                   | 1339                                             | 2120        | 1780        | 1844        | 5.456996341    |             |
| 5.744979372            | 6.712913663                                      |             | 11.09341107 |             | 8.394727997    |             |
| 9.316118012            |                                                  |             |             |             |                |             |
| ENSG00000204256        | 4047.051942                                      |             | 5439.349294 |             | 4913.437041    |             |
| 7590.593046            | 6681.229564                                      |             | 7285.525232 |             | 4799.946092    |             |
| 7185.782614            | -0.581852147                                     |             | 3.25E-05    |             | 0.000650337    | BRD2        |
| 6                      | 32968660                                         |             | 32981505    |             | + 7337         |             |
| protein_coding         | bromodomain containing 2 [Source:HGNC            |             |             |             |                |             |
| Symbol;Acc:HGNC:1103]  | -                                                |             | 3498        | 5868        | 5025           | 7556        |
| 7425                   | 26.07329983                                      |             | 35.26188657 |             | 31.7263421     | 7311        |
| 49.79372846            | 43.42270384                                      |             | 47.2415322  |             |                |             |
| ENSG00000164916        | 2042.037358                                      |             | 2315.52395  |             | 2683.078854    |             |
| 4429.185381            | 3132.71166                                       |             | 3676.614551 |             | 2346.880054    |             |
| 3746.170531            | -0.674326822                                     |             | 3.28E-05    |             | 0.000654801    | FOXK1       |
| 7                      | 4682309                                          | 4771443     | +           | 13093       | protein_coding |             |
| forkhead box K1        | [Source:HGNC Symbol;Acc:HGNC:23480]              |             |             |             | Fork           | 1765        |
| 2498                   | 2744                                             | 4409        | 3428        | 3747        | 7.372253403    |             |
| 8.411766799            | 9.70839404                                       |             | 16.28178994 |             | 11.40933266    |             |

|                                              |                                                      |             |                |        |  |
|----------------------------------------------|------------------------------------------------------|-------------|----------------|--------|--|
| 13.35951097                                  |                                                      |             |                |        |  |
| ENSG00000104679                              | 802.9314029                                          | 913.9738249 | 967.0426336    |        |  |
| 1374.263008                                  | 1400.947192                                          | 1380.570236 | 894.6492871    |        |  |
| 1385.260145                                  | -0.630164982                                         | 3.31E-05    | 0.00066021     | R3HCC1 |  |
| 8                                            | 23270120                                             | 23296279    | + 2630         |        |  |
| protein_coding                               | R3H domain and coiled-coil containing 1 [Source:HGNC |             |                |        |  |
| Symbol;Acc:HGNC:27329]                       | -                                                    | 694 986     | 989 1368       | 1533   |  |
| 1407                                         | 14.43106672                                          | 16.52932521 | 17.41979336    |        |  |
| 25.14962799                                  | 25.40066016                                          | 24.97378593 |                |        |  |
| ENSG00000092964                              | 2602.006809                                          | 2482.375155 | 2302.71527     |        |  |
| 1275.814342                                  | 1847.824672                                          | 1524.808917 | 2462.365745    |        |  |
| 1549.482644                                  | 0.667873249                                          | 3.33E-05    | 0.000662766    | DPYSL2 |  |
| 8                                            | 26514022                                             | 26658178    | + 7305         |        |  |
| protein_coding                               | dihydropyrimidinase like 2 [Source:HGNC              |             |                |        |  |
| Symbol;Acc:HGNC:3014]                        | -                                                    | 2249 2678   | 2355 1270      | 2022   |  |
| 1554                                         | 16.83697038                                          | 16.16308699 | 14.93389684    |        |  |
| 8.405909639                                  | 12.06200568                                          | 9.930630663 |                |        |  |
| ENSG00000125844                              | 2306.981581                                          | 2724.309403 | 4151.732075    |        |  |
| 1834.359833                                  | 1203.553459                                          | 1900.614461 | 3061.007686    |        |  |
| 1646.175918                                  | 0.895249025                                          | 3.34E-05    | 0.000665207    | RRBP1  |  |
| 20                                           | 17613678                                             | 17682295    | - 6980         |        |  |
| protein_coding                               | ribosome binding protein 1 [Source:HGNC              |             |                |        |  |
| Symbol;Acc:HGNC:10448]                       | -                                                    | 1994 2939   | 4246 1826      | 1317   |  |
| 1937                                         | 15.62300041                                          | 18.56428048 | 28.17909382    |        |  |
| 12.64871966                                  | 8.222217296                                          | 12.95448743 |                |        |  |
| ENSG00000058056                              | 1604.705844                                          | 1674.07376  | 1859.772588    |        |  |
| 1182.388567                                  | 1156.946605                                          | 985.1403815 | 1712.850731    |        |  |
| 1108.158518                                  | 0.628371515                                          | 3.35E-05    | 0.000665207    | USP13  |  |
| 3                                            | 179652755                                            | 179789401   | + 8440         |        |  |
| protein_coding                               | ubiquitin specific peptidase 13 [Source:HGNC         |             |                |        |  |
| Symbol;Acc:HGNC:12611]                       | -                                                    | 1387 1806   | 1902 1177      | 1266   |  |
| 1004                                         | 8.987289411                                          | 9.43429077  | 10.43927941    |        |  |
| 6.742721666                                  | 6.536569103                                          | 5.553123114 |                |        |  |
| ENSG00000126432                              | 1881.219685                                          | 2170.919572 | 2123.77816     |        |  |
| 2900.217327                                  | 2877.744754                                          | 3909.16263  | 2058.639139    |        |  |
| 3229.04157                                   | -0.649134294                                         | 3.40E-05    | 0.000675923    | PRDX5  |  |
| 11                                           | 64318088                                             | 64321811    | + 893          |        |  |
| protein_coding                               | peroxiredoxin 5 [Source:HGNC Symbol;Acc:HGNC:9355]   |             |                |        |  |
| -                                            | 1626 2342                                            | 2172 2887   | 3149 3984      |        |  |
| 99.57809075                                  | 115.6296976                                          | 112.6706547 | 156.3135195    |        |  |
| 153.6667122                                  | 208.2638568                                          |             |                |        |  |
| ENSG00000108509                              | 721.9440856                                          | 1021.500157 | 1004.198973    |        |  |
| 1562.119135                                  | 1445.726326                                          | 1495.372452 | 915.8810721    |        |  |
| 1501.072638                                  | -0.71164354                                          | 3.41E-05    | 0.000675932    | CAMTA2 |  |
| 17                                           | 4967992 4987652                                      | - 5999      | protein_coding |        |  |
| calmodulin binding transcription activator 2 | [Source:HGNC                                         |             |                |        |  |
| Symbol;Acc:HGNC:18807]                       | CG-1                                                 | 624 1102    | 1027 1555      | 1582   |  |
| 1524                                         | 5.688535078                                          | 8.099098681 | 7.930380722    |        |  |
| 12.53293386                                  | 11.4917512                                           | 11.85911119 |                |        |  |
| ENSG00000062485                              | 5060.55037                                           | 4647.73302  | 5254.688688    |        |  |

|                                     |                                                      |             |             |       |
|-------------------------------------|------------------------------------------------------|-------------|-------------|-------|
| 3772.191224                         | 3299.948017                                          | 3301.790223 | 4987.657359 |       |
| 3457.976488                         | 0.528445469                                          | 3.42E-05    | 0.000676233 | CS    |
| 12                                  | 56271699                                             | 56300392    | - 6402      |       |
| protein_coding                      | citrate synthase [Source:HGNC Symbol;Acc:HGNC:2422]  |             |             |       |
| -                                   | 4374 5014                                            | 5374 3755   | 3611 3365   |       |
| 37.36438356                         | 34.53048019                                          | 38.88520994 | 28.35929877 |       |
| 24.57935128                         | 24.53665941                                          |             |             |       |
| ENSG00000146112                     | 2574.239728                                          | 3091.382055 | 2986.196363 |       |
| 4135.84854                          | 4021.897321                                          | 4489.061002 | 2883.939382 |       |
| 4215.602287                         | -0.547372276                                         | 3.42E-05    | 0.000676233 |       |
| PPP1R18 6                           | 30676389                                             | 30687895    | - 4599      |       |
| protein_coding                      | protein phosphatase 1 regulatory subunit 18          |             |             |       |
| [Source:HGNC Symbol;Acc:HGNC:29413] | -                                                    | 2225        | 3335        | 3054  |
| 4117                                | 4401 4575                                            | 26.45826235 | 31.9717484  |       |
| 30.76154038                         | 43.28313148                                          | 41.70100837 | 46.43802325 |       |
| ENSG00000176208                     | 901.2731454                                          | 812.9361505 | 792.9945155 |       |
| 563.5683826                         | 413.0646646                                          | 488.6453287 | 835.7346038 |       |
| 488.4261253                         | 0.775086495                                          | 3.46E-05    | 0.000684232 | ATAD5 |
| 17                                  | 30831970                                             | 30895869    | + 7075      |       |
| protein_coding                      | "ATPase family, AAA domain containing 5 [Source:HGNC |             |             |       |
| Symbol;Acc:HGNC:25752]"             | -                                                    | 779 877     | 811 561     | 452   |
| 498                                 | 6.021514358                                          | 5.465213182 | 5.310028669 |       |
| 3.833872215                         | 2.784008702                                          | 3.285859083 |             |       |
| ENSG00000132842                     | 1988.817121                                          | 1750.083754 | 2058.265666 |       |
| 1185.402302                         | 1290.370147                                          | 1350.152555 | 1932.388847 |       |
| 1275.308335                         | 0.599312332                                          | 3.50E-05    | 0.000690168 | AP3B1 |
| 5                                   | 78000525                                             | 78294755    | - 7310      |       |
| protein_coding                      | adaptor related protein complex 3 subunit beta 1     |             |             |       |
| [Source:HGNC Symbol;Acc:HGNC:566]   | -                                                    | 1719        | 1888        | 2105  |
| 1180                                | 1412 1376                                            | 12.86036256 | 11.38724254 |       |
| 13.33942713                         | 7.804873111                                          | 8.417360304 | 8.787130834 |       |
| ENSG00000102265                     | 5615.891974                                          | 6148.466917 | 4243.645126 |       |
| 7839.728445                         | 8304.244706                                          | 8311.876665 | 5336.001339 |       |
| 8151.949939                         | -0.611403708                                         | 3.50E-05    | 0.000690168 | TIMP1 |
| X                                   | 47582313                                             | 47586789    | + 1541      |       |
| protein_coding                      | TIMP metalloproteinase inhibitor 1 [Source:HGNC      |             |             |       |
| Symbol;Acc:HGNC:11820]              | -                                                    | 4854 6633   | 4340 7804   | 9087  |
| 8471                                | 172.2629364                                          | 189.7760122 | 130.4636566 |       |
| 244.8588686                         | 256.9664869                                          | 256.6126602 |             |       |
| ENSG00000128335                     | 295.0252273                                          | 213.1987624 | 206.3154658 |       |
| 495.2570635                         | 407.5815053                                          | 499.4386994 | 238.1798185 |       |
| 467.4257561                         | -0.97476647                                          | 3.60E-05    | 0.000707928 | APOL2 |
| 22                                  | 36226203                                             | 36239954    | - 3484      |       |
| protein_coding                      | apolipoprotein L2 [Source:HGNC Symbol;Acc:HGNC:619]  |             |             |       |
| -                                   | 255 230                                              | 211 493     | 446 509     |       |
| 4.002734153                         | 2.910607524                                          | 2.805477337 | 6.84179393  |       |
| 5.578472675                         | 6.82002037                                           |             |             |       |
| ENSG00000160445                     | 848.0529083                                          | 826.8404176 | 885.885365  |       |
| 1423.487341                         | 1305.905765                                          | 1225.538184 | 853.592897  |       |
| 1318.31043                          | -0.627029774                                         | 3.63E-05    | 0.000712646 | ZER1  |

|                                     |                                                      |             |     |             |             |                |
|-------------------------------------|------------------------------------------------------|-------------|-----|-------------|-------------|----------------|
| 9                                   | 128729786                                            | 128772414   | -   | 4370        |             |                |
| protein_coding                      | zyg-11 related cell cycle regulator [Source:HGNC     |             |     |             |             |                |
| Symbol;Acc:HGNC:30960]              | -                                                    | 733         | 892 | 906         | 1417        | 1429           |
| 1249                                | 9.173123708                                          | 8.999479155 |     | 9.603935098 |             |                |
| 15.6779628                          | 14.24982036                                          | 13.34218743 |     |             |             |                |
| ENSG00000006125                     | 9688.397072                                          | 8538.146958 |     | 10328.48467 |             |                |
| 6655.330721                         | 6206.022428                                          | 7037.277706 |     | 9518.3429   |             |                |
| 6632.876951                         | 0.521066181                                          | 3.64E-05    |     | 0.000714697 |             | AP2B1          |
| 17                                  | 35578046                                             | 35726409    |     | +           | 7587        |                |
| protein_coding                      | adaptor related protein complex 2 subunit beta 1     |             |     |             |             |                |
| [Source:HGNC Symbol;Acc:HGNC:563]   | -                                                    |             |     | 8374        | 9211        | 10563          |
| 6625                                | 6791                                                 | 7172        |     | 60.3611611  | 53.52672304 |                |
| 64.49405023                         | 42.21988199                                          | 39.0051762  |     | 44.12820201 |             |                |
| ENSG00000146247                     | 2260.703114                                          | 1948.451298 |     | 2119.866966 |             |                |
| 1301.933376                         | 1493.24704                                           | 1424.724934 |     | 2109.673793 |             |                |
| 1406.635117                         | 0.584367825                                          | 3.65E-05    |     | 0.00071607  |             | PHIP           |
| 6                                   | 78935867                                             | 79078236    |     | -           | 13252       |                |
| protein_coding                      | pleckstrin homology domain interacting protein       |             |     |             |             |                |
| [Source:HGNC Symbol;Acc:HGNC:15673] | -                                                    |             |     | 1954        | 2102        | 2168           |
| 1296                                | 1634                                                 | 1452        |     | 8.063764669 | 6.993349651 |                |
| 7.578448549                         | 4.728515215                                          | 5.373153192 |     | 5.11483025  |             |                |
| ENSG00000091137                     | 98.34174244                                          | 81.57170039 |     | 101.6910353 |             |                |
| 24.10987733                         | 0                                                    | 10.79337071 |     | 93.86815937 | 11.63441601 |                |
|                                     | 3.021152347                                          | 3.71E-05    |     | 0.000726594 | SLC26A4     | 7              |
|                                     | 107660635                                            | 107717809   |     | +           | 5800        | protein_coding |
|                                     | solute carrier family 26 member 4 [Source:HGNC       |             |     |             |             |                |
| Symbol;Acc:HGNC:8818]               | -                                                    | 85          | 88  | 104         | 24          | 0              |
| 11                                  | 0.801466999                                          | 0.668942265 |     | 0.830630361 |             |                |
| 0.200071148                         | 0                                                    | 0.088534131 |     |             |             |                |
| ENSG00000138795                     | 697.6478905                                          | 642.3771406 |     | 900.5523413 |             |                |
| 420.918275                          | 460.5853782                                          | 376.7867595 |     | 746.8591241 |             |                |
| 419.4301376                         | 0.832256429                                          | 3.78E-05    |     | 0.000738817 |             | LEF1           |
| 4                                   | 108047545                                            | 108168956   |     | -           | 5361        |                |
| protein_coding                      | lymphoid enhancer binding factor 1 [Source:HGNC      |             |     |             |             |                |
| Symbol;Acc:HGNC:6551]               | HMG                                                  | 603         | 693 | 921         | 419         | 504            |
| 384                                 | 6.15129022                                           | 5.699298259 |     | 7.958226194 |             |                |
| 3.77893509                          | 4.096786455                                          | 3.343731935 |     |             |             |                |
| ENSG00000275183                     | 116.8531292                                          | 113.0880392 |     | 141.7807703 |             |                |
| 204.9339573                         | 382.9072886                                          | 298.2895179 |     | 123.9073129 |             |                |
| 295.3769213                         | -1.253669957                                         | 3.82E-05    |     | 0.000745656 |             | LENG9          |
| 19                                  | 54461796                                             | 54463711    |     | -           | 1916        |                |
| protein_coding                      | leukocyte receptor cluster member 9 [Source:HGNC     |             |     |             |             |                |
| Symbol;Acc:HGNC:16306]              | -                                                    | 101         | 122 | 145         | 204         | 419            |
| 304                                 | 2.882840282                                          | 2.807361139 |     | 3.505701652 |             |                |
| 5.14796848                          | 9.529653633                                          | 7.40668909  |     |             |             |                |
| ENSG00000189184                     | 362.1290045                                          | 214.1257135 |     | 487.9214097 |             |                |
| 142.6501075                         | 159.9254785                                          | 136.3889572 |     | 354.7253759 |             |                |
| 146.3215144                         | 1.276760257                                          | 3.83E-05    |     | 0.000746046 |             | PCDH18         |
| 4                                   | 137518918                                            | 137532494   |     | -           | 6686        |                |
| protein_coding                      | protocadherin 18 [Source:HGNC Symbol;Acc:HGNC:14268] |             |     |             |             |                |

|                         |                                                       |     |             |             |             |       |        |
|-------------------------|-------------------------------------------------------|-----|-------------|-------------|-------------|-------|--------|
| -                       | 313                                                   | 231 | 499         | 142         | 175         | 139   |        |
| 2.560192836             | 1.523279388                                           |     | 3.457296521 |             | 1.02688826  |       |        |
| 1.140591877             | 0.970497596                                           |     |             |             |             |       |        |
| ENSG00000187688         | 85.615164                                             |     | 107.5263323 |             | 109.5134226 |       |        |
| 222.0117871             | 227.5511095                                           |     | 245.3038799 |             | 100.884973  |       |        |
| 231.6222588             | -1.196809933                                          |     | 3.83E-05    |             | 0.000746071 |       | TRPV2  |
| 17                      | 16415542                                              |     | 16437003    |             | +           | 3410  |        |
| protein_coding          | transient receptor potential cation channel subfamily |     |             |             |             |       |        |
| V member 2 [Source:HGNC | Symbol;Acc:HGNC:18082]                                |     | -           |             | 74          | 116   |        |
| 112                     | 221                                                   | 249 | 250         | 1.186785013 | 1.49981457  |       |        |
| 1.52147948              | 3.133567911                                           |     | 3.182024842 |             | 3.422407079 |       |        |
| ENSG00000149823         | 2035.095588                                           |     | 2937.508165 |             | 2664.500684 |       |        |
| 4007.262528             | 3844.608504                                           |     | 3939.580311 |             | 2545.701479 |       |        |
| 3930.483781             | -0.626136936                                          |     | 3.85E-05    |             | 0.000748812 |       | VPS51  |
| 11                      | 65089324                                              |     | 65111860    |             | +           | 4878  |        |
| protein_coding          | "VPS51, GARP complex subunit [Source:HGNC             |     |             |             |             |       |        |
| Symbol;Acc:HGNC:1172]"  | -                                                     |     | 1759        | 3169        | 2725        | 3989  | 4207   |
| 4015                    | 19.72053788                                           |     | 28.64272947 |             | 25.87778894 |       |        |
| 39.53879749             | 37.58281566                                           |     | 38.42286894 |             |             |       |        |
| ENSG00000108821         | 38319.72766                                           |     | 24612.40669 |             | 64413.44846 |       |        |
| 14697.98397             | 8874.49327                                            |     | 12084.65034 |             | 42448.52761 |       |        |
| 11885.70919             | 1.836490685                                           |     | 3.87E-05    |             | 0.000749822 |       | COL1A1 |
| 17                      | 50183289                                              |     | 50201632    |             | -           | 9819  |        |
| protein_coding          | collagen type I alpha 1 chain [Source:HGNC            |     |             |             |             |       |        |
| Symbol;Acc:HGNC:2197]"  | -                                                     |     | 33121       | 26552       | 65876       | 14631 | 9711   |
| 12316                   | 184.4721857                                           |     | 119.2240683 |             | 310.786694  |       |        |
| 72.04568365             | 43.0978189                                            |     | 58.55290626 |             |             |       |        |
| ENSG00000048740         | 76.3594706                                            |     | 110.3071858 |             | 144.7141656 |       |        |
| 39.17855066             | 17.36333767                                           |     | 25.51160351 |             | 110.460274  |       |        |
| 27.35116395             | 2.018631849                                           |     | 3.87E-05    |             | 0.000749822 |       | CELF2  |
| 10                      | 10798397                                              |     | 11336675    |             | +           | 10978 |        |
| protein_coding          | CUGBP Elav-like family member 2 [Source:HGNC          |     |             |             |             |       |        |
| Symbol;Acc:HGNC:2550]"  | -                                                     |     | 66          | 119         | 148         | 39    | 19     |
| 26                      | 0.328787594                                           |     | 0.477922738 |             | 0.624512226 |       |        |
| 0.171768134             | 0.075420424                                           |     | 0.110559523 |             |             |       |        |
| ENSG00000179833         | 784.4200161                                           |     | 750.8304241 |             | 626.7687848 |       |        |
| 1272.800607             | 1101.201152                                           |     | 1112.698399 |             | 720.673075  |       |        |
| 1162.233386             | -0.689805606                                          |     | 3.87E-05    |             | 0.000749822 |       |        |
| SERTAD2 2               | 64631621                                              |     | 64751005    |             | -           | 6274  |        |
| protein_coding          | SERTA domain containing 2 [Source:HGNC                |     |             |             |             |       |        |
| Symbol;Acc:HGNC:30784]" | -                                                     |     | 678         | 810         | 641         | 1267  | 1205   |
| 1134                    | 5.909896733                                           |     | 5.692125443 |             | 4.732776228 |       |        |
| 9.764124694             | 8.369531154                                           |     | 8.437515352 |             |             |       |        |
| ENSG00000074416         | 2192.442375                                           |     | 2767.876107 |             | 2085.644022 |       |        |
| 3346.250058             | 3512.877369                                           |     | 3950.373681 |             | 2348.654168 |       |        |
| 3603.167036             | -0.617167478                                          |     | 3.88E-05    |             | 0.000751408 |       | MGLL   |
| 3                       | 127689062                                             |     | 128052190   |             | -           | 11849 |        |
| protein_coding          | monoglyceride lipase [Source:HGNC                     |     |             |             |             |       |        |
| Symbol;Acc:HGNC:17038]" | -                                                     |     | 1895        | 2986        | 2133        | 3331  | 3844   |
| 4026                    | 8.74625686                                            |     | 11.11071639 |             | 8.338954646 |       |        |

|                                                                        |              |             |             |             |                |
|------------------------------------------------------------------------|--------------|-------------|-------------|-------------|----------------|
| 13.5923375                                                             | 14.13709828  | 15.86127544 |             |             |                |
| ENSG00000101596                                                        | 2866.951032  | 2506.475885 | 2667.434079 |             |                |
| 1866.506337                                                            | 1794.820799  | 1872.159211 | 2680.286999 |             |                |
| 1844.495449                                                            | 0.538975186  | 3.89E-05    | 0.000751842 | SMCHD1      |                |
| 18                                                                     | 2655738      | 2805017     | +           | 12435       | protein_coding |
| structural maintenance of chromosomes flexible hinge domain containing |              |             |             |             |                |
| 1 [Source:HGNC Symbol;Acc:HGNC:29090]                                  | -            |             | 2478        | 2704        | 2728           |
| 1858                                                                   | 1964         | 1908        | 10.89808586 | 9.587267734 |                |
| 10.16251108                                                            | 7.22438923   | 6.882627915 | 7.162730592 |             |                |
| ENSG00000176994                                                        | 1504.050178  | 1328.320985 | 1464.742027 |             |                |
| 2737.475655                                                            | 2101.877718  | 1964.39347  | 1432.371064 |             |                |
| 2267.915614                                                            | -0.663075127 | 3.99E-05    | 0.000770408 | SMCR8       |                |
| 17                                                                     | 18315310     | 18328055    | +           | 8279        |                |
| protein_coding "Smith-Magenis syndrome chromosome region, candidate 8  |              |             |             |             |                |
| [Source:HGNC Symbol;Acc:HGNC:17921]"                                   | -            |             | 1300        | 1433        | 1498           |
| 2725                                                                   | 2300         | 2002        | 8.587370137 | 7.631365701 |                |
| 8.38178249                                                             | 15.91438428  | 12.1062197  | 11.28839575 |             |                |
| ENSG00000184867                                                        | 947.5516124  | 853.7220007 | 569.0786782 |             |                |
| 1284.855546                                                            | 1680.588315  | 1278.523822 | 790.1174304 |             |                |
| 1414.655894                                                            | -0.841108114 | 4.00E-05    | 0.000770408 | ARMCX2      |                |
| X                                                                      | 101655281    | 101659891   | -           | 3589        |                |
| protein_coding armadillo repeat containing X-linked 2 [Source:HGNC     |              |             |             |             |                |
| Symbol;Acc:HGNC:16869]                                                 | -            | 819         | 921         | 582         | 1279           |
| 1303                                                                   | 12.47972904  | 11.31410305 | 7.51193778  | 1839        |                |
| 17.23051676                                                            | 22.32887635  | 16.94794294 |             |             |                |
| ENSG00000205208                                                        | 1286.541383  | 920.4624829 | 1070.689266 |             |                |
| 536.4447706                                                            | 767.642297   | 535.7436736 | 1092.564377 |             |                |
| 613.2769137                                                            | 0.831987015  | 4.01E-05    | 0.000771552 |             |                |
| C4orf46 4                                                              | 158666679    | 158672255   | -           | 3730        |                |
| protein_coding chromosome 4 open reading frame 46 [Source:HGNC         |              |             |             |             |                |
| Symbol;Acc:HGNC:27320]                                                 | -            | 1112        | 993         | 1095        | 534            |
| 546                                                                    | 16.30386866  | 11.73746674 | 13.59902409 | 840         |                |
| 6.922032622                                                            | 9.813615812  | 6.833289913 |             |             |                |
| ENSG00000132128                                                        | 3509.064762  | 3533.537749 | 3086.9096   |             |                |
| 5245.907475                                                            | 4539.142011  | 4834.448864 | 3376.504037 |             |                |
| 4873.166117                                                            | -0.529331202 | 4.01E-05    | 0.000771636 | LRR41       |                |
| 1                                                                      | 46261196     | 46303608    | -           | 8606        |                |
| protein_coding leucine rich repeat containing 41 [Source:HGNC          |              |             |             |             |                |
| Symbol;Acc:HGNC:16917]                                                 | -            | 3033        | 3812        | 3157        | 5222           |
| 4927                                                                   | 19.27373047  | 19.52924745 | 16.99322063 | 4967        |                |
| 29.3384214                                                             | 25.15077755  | 26.72558722 |             |             |                |
| ENSG00000182054                                                        | 1550.328645  | 1532.250236 | 2164.845693 |             |                |
| 1000.559909                                                            | 1078.354655  | 1133.303925 | 1749.141525 |             |                |
| 1070.739496                                                            | 0.708178176  | 4.04E-05    | 0.000775969 | IDH2        |                |
| 15                                                                     | 90083045     | 90102504    | -           | 2814        |                |
| protein_coding "isocitrate dehydrogenase (NADP(+)) 2, mitochondrial    |              |             |             |             |                |
| [Source:HGNC Symbol;Acc:HGNC:5383]"                                    | -            |             | 1340        | 1653        | 2214           |
| 996                                                                    | 1180         | 1155        | 26.04206497 | 25.89898347 |                |
| 36.44651262                                                            | 17.11340632  | 18.27328013 | 19.16037157 |             |                |
| ENSG00000117592                                                        | 5254.919931  | 4478.100961 | 5036.639642 |             |                |



|                        |                                                   |              |                        |        |
|------------------------|---------------------------------------------------|--------------|------------------------|--------|
| 2780.672519            | 3479.064553                                       | 3588.305155  | 4923.220178            |        |
| 3282.680742            | 0.584540069                                       | 4.06E-05     | 0.000778329            | PRDX6  |
| 1                      | 173477266                                         | 173488807    | + 2367                 |        |
| protein_coding         | peroxiredoxin 6                                   | [Source:HGNC | Symbol;Acc:HGNC:16753] |        |
| -                      | 4542 4831                                         | 5151 2768    | 3807 3657              |        |
| 104.9406101            | 89.98554214                                       | 100.8081739  | 56.54172374            |        |
| 70.08792726            | 72.12282647                                       |              |                        |        |
| ENSG00000144366        | 269.5720704                                       | 215.9796158  | 217.0712484            |        |
| 523.3852537            | 477.034856                                        | 370.8994664  | 234.2076449            |        |
| 457.1065253            | -0.966272627                                      | 4.07E-05     | 0.000779262            | GULP1  |
| 2                      | 188291669                                         | 188595931    | + 11979                |        |
| protein_coding         | "GULP, engulfment adaptor PTB domain containing 1 |              |                        |        |
| [Source:HGNC           | Symbol;Acc:HGNC:18649]"                           | -            | 233 233                | 222    |
| 521                    | 522 378                                           | 1.063726721  | 0.857569475            |        |
| 0.858489258            | 2.102898808                                       | 1.898928164  | 1.473049262            |        |
| ENSG00000170604        | 902.4301071                                       | 1896.542034  | 1940.929856            |        |
| 3235.746453            | 2671.212422                                       | 3063.354852  | 1579.967332            |        |
| 2990.104576            | -0.919534178                                      | 4.10E-05     | 0.000784419            |        |
| IRF2BP1 19             | 45883607                                          | 45886170     | - 2564                 |        |
| protein_coding         | interferon regulatory factor 2 binding protein 1  |              |                        |        |
| [Source:HGNC           | Symbol;Acc:HGNC:21728]                            | -            | 780 2046               | 1985   |
| 3221                   | 2923 3122                                         | 16.63685742  | 35.18208443            |        |
| 35.86286208            | 60.73987873                                       | 49.67860501  | 56.8408958             |        |
| ENSG00000179134        | 3719.631787                                       | 3937.688446  | 3972.794965            |        |
| 6019.432706            | 4872.700866                                       | 6094.329591  | 3876.705066            |        |
| 5662.154388            | -0.546370218                                      | 4.16E-05     | 0.000795402            | SAMD4B |
| 19                     | 39342396                                          | 39385710     | + 8057                 |        |
| protein_coding         | sterile alpha motif domain containing 4B          | [Source:HGNC |                        |        |
| Symbol;Acc:HGNC:25492] | -                                                 | 3215 4248    | 4063 5992              | 5332   |
| 6211                   | 21.82239067                                       | 23.24583241  | 23.36016546            |        |
| 35.95834191            | 28.83867979                                       | 35.98605186  |                        |        |
| ENSG00000156603        | 736.9845874                                       | 907.4851669  | 819.3950727            |        |
| 1300.928798            | 1182.534681                                       | 1442.386814  | 821.2882757            |        |
| 1308.616764            | -0.671252733                                      | 4.17E-05     | 0.000795402            | MED19  |
| 11                     | 57703714                                          | 57712323     | - 1877                 |        |
| protein_coding         | mediator complex subunit 19                       | [Source:HGNC |                        |        |
| Symbol;Acc:HGNC:29600] | -                                                 | 637 979      | 838 1295               | 1294   |
| 1470                   | 18.55965387                                       | 22.99600409  | 20.68150798            |        |
| 33.35851524            | 30.04198338                                       | 36.55940323  |                        |        |
| ENSG00000106070        | 821.4427898                                       | 739.7070104  | 847.7512268            |        |
| 497.2662199            | 496.2259134                                       | 484.7204666  | 802.967009             |        |
| 492.7375333            | 0.704276746                                       | 4.21E-05     | 0.000803305            | GRB10  |
| 7                      | 50590063                                          | 50793462     | - 9795                 |        |
| protein_coding         | growth factor receptor bound protein 10           | [Source:HGNC |                        |        |
| Symbol;Acc:HGNC:4564]  | -                                                 | 710 798      | 867 495                | 543    |
| 494                    | 3.964136689                                       | 3.591967587  | 4.100313971            |        |
| 2.443441665            | 2.415761118                                       | 2.354336547  |                        |        |
| ENSG00000186642        | 129.5797077                                       | 195.5866907  | 128.0915925            |        |
| 265.2086506            | 338.1281546                                       | 433.6972596  | 151.085997             |        |
| 345.6780216            | -1.192115161                                      | 4.23E-05     | 0.000805164            | PDE2A  |

|                                                      |                                                      |             |             |             |                      |
|------------------------------------------------------|------------------------------------------------------|-------------|-------------|-------------|----------------------|
| 11                                                   | 72576141                                             | 72674591    | -           | 7182        |                      |
| protein_coding                                       | phosphodiesterase 2A [Source:HGNC                    |             |             |             |                      |
| Symbol;Acc:HGNC:8777]                                | -                                                    | 112         | 211         | 131         | 264 370              |
| 442                                                  | 0.852839554                                          | 1.29530193  | 0.844944826 |             |                      |
| 1.777295915                                          | 2.244992637                                          | 2.872915844 |             |             |                      |
| ENSG00000106089                                      | 983.4174244                                          | 1107.706613 | 989.5319972 |             |                      |
| 1715.819603                                          | 1548.992492                                          | 1454.1614   | 1026.885345 |             |                      |
| 1572.991165                                          | -0.614847161                                         | 4.34E-05    | 0.00082543  | STX1A       |                      |
| 7                                                    | 73699206                                             | 73719672    | -           | 3693        |                      |
| protein_coding                                       | syntaxin 1A [Source:HGNC Symbol;Acc:HGNC:11433] -    |             |             |             |                      |
| 850                                                  | 1195                                                 | 1012        | 1708        | 1695        | 1482 12.58735065     |
| 14.26666802                                          | 12.69415102                                          | 22.36195531 | 20.00087486 |             |                      |
| 18.73332777                                          |                                                      |             |             |             |                      |
| ENSG00000090520                                      | 1548.014722                                          | 1229.137213 | 1717.991817 |             |                      |
| 905.124978                                           | 860.8560045                                          | 1005.745907 | 1498.381251 |             |                      |
| 923.9089633                                          | 0.697450658                                          | 4.36E-05    | 0.00082818  |             |                      |
| DNAJB11 3                                            | 186567403                                            | 186585800   | +           | 5731        |                      |
| protein_coding                                       | DnaJ heat shock protein family (Hsp40) member B11    |             |             |             |                      |
| [Source:HGNC Symbol;Acc:HGNC:14889]                  | -                                                    |             | 1338        | 1326        | 1757                 |
| 901                                                  | 942                                                  | 1025        | 12.76792779 | 10.20110161 |                      |
| 14.20181362                                          | 7.601435224                                          | 7.162738434 | 8.349096732 |             |                      |
| ENSG00000184281                                      | 433.8606284                                          | 667.4048214 | 667.8363182 |             |                      |
| 1174.351942                                          | 891.0133805                                          | 1111.717184 | 589.7005893 |             |                      |
| 1059.027502                                          | -0.843075859                                         | 4.37E-05    | 0.00082883  | TSSC4       |                      |
| 11                                                   | 2400488                                              | 2403878     | +           | 2659        | protein_coding tumor |
| suppressing subtransferable candidate 4 [Source:HGNC |                                                      |             |             |             |                      |
| Symbol;Acc:HGNC:12386]                               | -                                                    | 375         | 720         | 683         | 1169 975             |
| 1133                                                 | 7.712721385                                          | 11.93845473 | 11.89884541 |             |                      |
| 21.25677572                                          | 15.97882631                                          | 19.89104539 |             |             |                      |
| ENSG00000144724                                      | 2846.125722                                          | 2801.246348 | 3890.659898 |             |                      |
| 2260.301                                             | 1830.461334                                          | 1900.614461 | 3179.343989 |             |                      |
| 1997.125598                                          | 0.671010458                                          | 4.38E-05    | 0.00082883  | PTPRG       |                      |
| 3                                                    | 61561569                                             | 62297613    | +           | 14629       |                      |
| protein_coding                                       | "protein tyrosine phosphatase, receptor type G       |             |             |             |                      |
| [Source:HGNC Symbol;Acc:HGNC:9671]"                  | -                                                    |             | 2460        | 3022        | 3979                 |
| 2250                                                 | 2003                                                 | 1937        | 9.196343402 | 9.10780614  |                      |
| 12.59974498                                          | 7.436508774                                          | 5.966572294 | 6.181032351 |             |                      |
| ENSG00000117640                                      | 1236.792031                                          | 1065.993812 | 1017.888151 |             |                      |
| 1554.082509                                          | 1875.240468                                          | 1713.202297 | 1106.891332 |             |                      |
| 1714.175092                                          | -0.631710626                                         | 4.41E-05    | 0.000833741 | MTFR1L      |                      |
| 1                                                    | 25818640                                             | 25832942    | +           | 5817        |                      |
| protein_coding                                       | mitochondrial fission regulator 1 like [Source:HGNC  |             |             |             |                      |
| Symbol;Acc:HGNC:28836]                               | -                                                    | 1069        | 1150        | 1041        | 1547 2052            |
| 1746                                                 | 10.05016875                                          | 8.71631134  | 8.289992192 |             |                      |
| 12.85856387                                          | 15.37223059                                          | 14.0117123  |             |             |                      |
| ENSG00000142856                                      | 1056.30601                                           | 850.0141962 | 964.1092383 |             |                      |
| 524.3898319                                          | 662.5484111                                          | 522.9878719 | 956.8098148 |             |                      |
| 569.9753716                                          | 0.746375004                                          | 4.42E-05    | 0.000835931 |             |                      |
| ITGB3BP 1                                            | 63440770                                             | 63593721    | -           | 5459        |                      |
| protein_coding                                       | integrin subunit beta 3 binding protein [Source:HGNC |             |             |             |                      |

|                                                          |                                             |             |             |             |             |                |
|----------------------------------------------------------|---------------------------------------------|-------------|-------------|-------------|-------------|----------------|
| Symbol;Acc:HGNC:6157]                                    | -                                           | 913         | 917         | 986         | 522         | 725            |
| 533                                                      | 9.146446448                                 | 7.406110702 |             | 8.366932714 |             |                |
| 4.623369729                                              | 5.787400134                                 | 4.557851283 |             |             |             |                |
| ENSG00000138696                                          | 369.0707746                                 | 283.6470491 |             | 158.4033434 |             |                |
| 625.8522323                                              | 767.642297                                  | 453.32157   |             | 270.3737224 |             |                |
| 615.6053664                                              | -1.18905173                                 | 4.47E-05    |             | 0.000844498 |             | BMPR1B         |
| 4                                                        | 94757968                                    | 95158448    |             | +           | 6312        |                |
| protein_coding                                           | bone morphogenetic protein receptor type 1B |             |             |             |             |                |
| [Source:HGNC Symbol;Acc:HGNC:1077]                       | -                                           |             |             | 319         | 306         | 162            |
| 623                                                      | 840                                         | 462         | 2.763875051 | 2.137412743 |             |                |
| 1.188914107                                              | 4.77223996                                  |             | 5.799237481 | 3.416811508 |             |                |
| ENSG00000111602                                          | 1542.229914                                 |             | 1662.023396 | 1831.416433 |             |                |
| 1244.672417                                              | 799.6273927                                 |             | 977.2906574 | 1678.556581 |             |                |
| 1007.196822                                              | 0.737437937                                 |             | 4.49E-05    | 0.000846744 |             |                |
| TIMELESS                                                 | 12                                          | 56416373    | 56449403    | -           |             | 5818           |
| protein_coding                                           | timeless circadian regulator                |             |             |             |             |                |
| [Source:HGNC Symbol;Acc:HGNC:11813]                      | -                                           | 1333        | 1793        | 1873        | 1239        | 875            |
| 996                                                      | 12.53000214                                 |             | 13.58753046 | 14.91305145 |             |                |
| 10.2967177                                               | 6.553796225                                 |             | 7.991561709 |             |             |                |
| ENSG00000106266                                          | 1843.039949                                 |             | 2074.516653 | 2109.111184 |             |                |
| 2809.805287                                              | 2813.774563                                 |             | 3271.372542 | 2008.889262 |             |                |
| 2964.98413                                               | -0.561314075                                |             | 4.53E-05    | 0.000852144 |             | SNX8           |
| 7                                                        | 2251770                                     | 2354318     | -           | 5773        |             | protein_coding |
| sorting nexin 8                                          | [Source:HGNC Symbol;Acc:HGNC:14972]         |             |             |             |             | 1593           |
| 2238                                                     | 2157                                        | 2797        | 3079        | 3334        | 15.09068421 |                |
| 17.0919842                                               | 17.30816567                                 |             | 23.42567563 | 23.24163782 |             |                |
| 26.95939077                                              |                                             |             |             |             |             |                |
| ENSG00000065154                                          | 1460.085635                                 |             | 1535.95804  | 1630.967758 |             |                |
| 934.2577465                                              | 898.3242595                                 |             | 1135.266356 | 1542.337144 |             |                |
| 989.2827873                                              | 0.640960355                                 |             | 4.57E-05    | 0.0008587   |             | OAT            |
| 10                                                       | 124397303                                   |             | 124418976   | -           | 3388        |                |
| protein_coding                                           | ornithine aminotransferase                  |             |             |             |             |                |
| [Source:HGNC Symbol;Acc:HGNC:8091]                       | -                                           | 1262        | 1657        | 1668        | 930         | 983            |
| 1157                                                     | 20.37092107                                 |             | 21.56319274 | 22.80631405 |             |                |
| 13.27213417                                              | 12.64354079                                 |             | 15.94174996 |             |             |                |
| ENSG00000101384                                          | 1870.80703                                  |             | 1625.872301 | 2818.015035 |             |                |
| 1431.523966                                              | 922.9984762                                 |             | 1104.848675 | 2104.898122 |             |                |
| 1153.123706                                              | 0.868502259                                 |             | 4.70E-05    | 0.000883402 |             | JAG1           |
| 20                                                       | 10637684                                    |             | 10673999    | -           | 9298        |                |
| protein_coding                                           | jagged 1                                    |             |             |             |             |                |
| [Source:HGNC Symbol;Acc:HGNC:6188]                       | -                                           |             |             |             |             |                |
| 1617                                                     | 1754                                        | 2882        | 1425        | 1010        | 1126        | 9.510759304    |
| 8.317139871                                              | 14.35842786                                 |             | 7.410142146 | 4.733587721 |             |                |
| 5.653206954                                              |                                             |             |             |             |             |                |
| ENSG0000011132                                           | 313.5366141                                 |             | 429.1783782 | 438.0536904 |             |                |
| 792.6122172                                              | 709.1552649                                 |             | 620.1282083 | 393.5895609 |             |                |
| 707.2985635                                              | -0.843995336                                |             | 4.76E-05    | 0.000892287 |             | APBA3          |
| 19                                                       | 3750819                                     | 3761699     | -           | 5556        |             | protein_coding |
| amyloid beta precursor protein binding family A member 3 | [Source:HGNC Symbol;Acc:HGNC:580]           |             |             |             |             |                |
| 632                                                      | 2.667483652                                 |             | 3.674114715 | 3.7352376   |             | 776            |

|                                     |                                                                                                               |             |             |             |      |             |
|-------------------------------------|---------------------------------------------------------------------------------------------------------------|-------------|-------------|-------------|------|-------------|
| 6.866192619                         | 6.086366239                                                                                                   | 5.310077713 |             |             |      |             |
| ENSG00000166881                     | 1822.214639                                                                                                   | 1500.733897 | 1766.881738 |             |      |             |
| 1215.539649                         | 1032.661661                                                                                                   | 1040.088451 | 1696.610091 |             |      |             |
| 1096.096587                         | 0.63012625                                                                                                    | 4.77E-05    | 0.000893872 | NEMP1       |      |             |
| 12                                  | 57055643                                                                                                      | 57088063    | - 5708      |             |      |             |
| protein_coding                      | nuclear envelope integral membrane protein 1                                                                  |             |             |             |      |             |
| [Source:HGNC Symbol;Acc:HGNC:29001] | -                                                                                                             | 1575        | 1619        | 1807        |      |             |
| 1210                                | 1130                                                                                                          | 1060        | 15.09007181 | 12.50537854 |      |             |
| 14.66481687                         | 10.24949864                                                                                                   | 8.626866487 | 8.668978716 |             |      |             |
| ENSG00000187164                     | 594.6783013                                                                                                   | 299.4052185 | 374.4967934 |             |      |             |
| 196.8973315                         | 193.738294                                                                                                    | 187.4121642 | 422.8601044 |             |      |             |
| 192.6825966                         | 1.132135639                                                                                                   | 4.81E-05    | 0.000900562 | SHTN1       |      |             |
| 10                                  | 116881482                                                                                                     | 117126586   | - 8247      |             |      |             |
| protein_coding                      | shootin 1 [Source:HGNC Symbol;Acc:HGNC:29319]                                                                 |             |             | -           |      |             |
| 514                                 | 323                                                                                                           | 383         | 196         | 212         | 191  | 3.408488532 |
| 1.72679382                          | 2.151321092                                                                                                   | 1.149109178 | 1.120207469 |             |      |             |
| 1.081143667                         |                                                                                                               |             |             |             |      |             |
| ENSG00000167889                     | 298.4961123                                                                                                   | 355.9492381 | 447.8316746 |             |      |             |
| 197.9019097                         | 112.4047649                                                                                                   | 181.5248711 | 367.425675  |             |      |             |
| 163.9438486                         | 1.166226788                                                                                                   | 4.86E-05    | 0.000908138 | MGAT5B      |      |             |
| 17                                  | 76868456                                                                                                      | 76950393    | + 6386      |             |      |             |
| protein_coding                      | "alpha-1,6-mannosylglycoprotein 6-beta-N-acetylglucosaminyltransferase B [Source:HGNC Symbol;Acc:HGNC:24140]" |             |             |             |      |             |
| -                                   | 258                                                                                                           | 384         | 458         | 197         | 123  | 185         |
| 2.209456749                         | 2.651162012                                                                                                   | 3.322301327 | 1.491552445 |             |      |             |
| 0.839333959                         | 1.352349205                                                                                                   |             |             |             |      |             |
| ENSG00000089006                     | 2227.151226                                                                                                   | 1957.720809 | 2028.931714 |             |      |             |
| 1439.560592                         | 1313.216644                                                                                                   | 1448.274107 | 2071.267916 |             |      |             |
| 1400.350448                         | 0.564572136                                                                                                   | 4.87E-05    | 0.000908138 | SNX5        |      |             |
| 20                                  | 17941597                                                                                                      | 17968980    | - 7953      |             |      |             |
| protein_coding                      | sorting nexin 5 [Source:HGNC Symbol;Acc:HGNC:14969]                                                           |             |             |             |      |             |
| -                                   | 1925                                                                                                          | 2112        | 2075        | 1433        | 1437 | 1476        |
| 13.23714921                         | 11.70838216                                                                                                   | 12.08619437 | 8.711971067 |             |      |             |
| 7.873800076                         | 8.66366021                                                                                                    |             |             |             |      |             |
| ENSG00000085999                     | 622.4453815                                                                                                   | 591.3948279 | 711.837247  |             |      |             |
| 361.6481599                         | 416.7201041                                                                                                   | 289.4585782 | 641.8924855 |             |      |             |
| 355.9422808                         | 0.850252302                                                                                                   | 4.88E-05    | 0.000909564 | RAD54L      |      |             |
| 1                                   | 46247688                                                                                                      | 46278473    | + 3212      |             |      |             |
| protein_coding                      | RAD54 like [Source:HGNC Symbol;Acc:HGNC:9826]                                                                 |             |             | -           |      |             |
| 538                                 | 638                                                                                                           | 728         | 360         | 456         | 295  | 9.16012609  |
| 8.757478909                         | 10.49925052                                                                                                   | 5.41911267  | 6.186541119 |             |      |             |
| 4.287385306                         |                                                                                                               |             |             |             |      |             |
| ENSG00000071794                     | 3180.487647                                                                                                   | 2985.709625 | 2830.726415 |             |      |             |
| 2187.971368                         | 1922.761182                                                                                                   | 2100.782427 | 2998.974562 |             |      |             |
| 2070.504992                         | 0.534457613                                                                                                   | 5.04E-05    | 0.000938107 | HLTF        |      |             |
| 3                                   | 149030127                                                                                                     | 149086554   | - 6024      |             |      |             |
| protein_coding                      | helicase like transcription factor [Source:HGNC Symbol;Acc:HGNC:11099]                                        |             |             | -           |      |             |
| 2141                                | 24.95654662                                                                                                   | 23.5743496  | 22.26209649 | 2104        |      |             |
| 17.48131621                         | 15.22016533                                                                                                   | 16.59119776 |             |             |      |             |

|                 |                                                                                     |             |             |             |
|-----------------|-------------------------------------------------------------------------------------|-------------|-------------|-------------|
| ENSG00000196235 | 4296.955664                                                                         | 5326.261255 | 4610.319532 |             |
| 6947.662984     | 6340.35983                                                                          | 7391.496508 | 4744.51215  |             |
| 6893.173107     | -0.538694374                                                                        | 5.06E-05    | 0.000940868 | SUPT5H      |
| 19              | 39436156                                                                            | 39476670    | + 8568      |             |
| protein_coding  | "SPT5 homolog, DSIF elongation factor subunit [Source:HGNC Symbol;Acc:HGNC:11469]"  |             |             |             |
| 6916            | 6938                                                                                | 7533        | 23.70593855 | 29.56787556 |
| 25.49204609     | 39.02804017                                                                         | 35.28689421 | 41.0425698  | 4715        |
| ENSG00000238227 | 887.3896053                                                                         | 1266.215258 | 1504.831762 |             |
| 2258.291843     | 1874.326609                                                                         | 2071.345962 | 1219.478875 |             |
| 2067.988138     | -0.761107413                                                                        | 5.11E-05    | 0.000948495 |             |
| TMEM250         | 9                                                                                   | 136114581   | 136118863   | - 3396      |
| protein_coding  | transmembrane protein 250 [Source:HGNC Symbol;Acc:HGNC:31009]                       |             |             |             |
| 2111            | 12.35157657                                                                         | 17.73441944 | 20.99294626 | 2051        |
| 32.0058851      | 26.31822385                                                                         | 29.01794061 |             |             |
| ENSG00000130816 | 6656.00052                                                                          | 7840.152749 | 9506.156202 |             |
| 5799.430076     | 3924.114314                                                                         | 5202.404684 | 8000.769824 |             |
| 4975.316358     | 0.685519681                                                                         | 5.14E-05    | 0.000953153 | DNMT1       |
| 19              | 10133345                                                                            | 10231286    | - 9796      |             |
| protein_coding  | DNA methyltransferase 1 [Source:HGNC Symbol;Acc:HGNC:2976]                          |             |             |             |
| 5302            | 32.1173948                                                                          | 38.06736904 | 45.97368291 | 4294        |
| 28.49403789     | 19.10169302                                                                         | 25.26602856 |             |             |
| ENSG00000248323 | 758.9668593                                                                         | 977.9334536 | 477.1656271 |             |
| 1194.443506     | 2024.199628                                                                         | 1249.087356 | 738.02198   |             |
| 1489.243497     | -1.012887084                                                                        | 5.18E-05    | 0.000960403 | LUCAT1      |
| 5               | 91054834                                                                            | 91314547    | - 16538     |             |
| antisense       | lung cancer associated transcript 1 [Source:HGNC Symbol;Acc:HGNC:48498]             |             |             |             |
| 1273            | 2.169279762                                                                         | 2.812570582 | 1.366908016 | 2215        |
| 3.476162607     | 5.836457679                                                                         | 3.593283241 |             |             |
| ENSG00000198682 | 673.3516953                                                                         | 491.2841046 | 631.6577768 |             |
| 302.3780448     | 213.8432113                                                                         | 383.6552681 | 598.7645256 |             |
| 299.9588414     | 0.997342203                                                                         | 5.27E-05    | 0.000975893 | PAPSS2      |
| 10              | 87659613                                                                            | 87747705    | + 4083      |             |
| protein_coding  | 3'-phosphoadenosine 5'-phosphosulfate synthase 2 [Source:HGNC Symbol;Acc:HGNC:8604] |             |             |             |
| 301             | 234                                                                                 | 391         | 7.795398433 | 5.723088314 |
| 7.329183477     | 3.564415571                                                                         | 2.497440069 | 4.470369417 | 646         |
| ENSG00000116133 | 6716.162528                                                                         | 6964.183921 | 9492.467024 |             |
| 5385.543848     | 4132.474366                                                                         | 5221.047779 | 7724.271158 |             |
| 4913.021998     | 0.652915832                                                                         | 5.40E-05    | 0.000998423 | DHCR24      |
| 1               | 54849627                                                                            | 54887271    | - 6290      |             |
| protein_coding  | 24-dehydrocholesterol reductase [Source:HGNC Symbol;Acc:HGNC:2859]                  |             |             |             |
| 5321            | 50.47150922                                                                         | 52.6619215  | 71.49597252 | 4522        |
| 41.20940825     | 31.32842129                                                                         | 39.49013781 |             |             |
| ENSG00000087111 | 1119.938902                                                                         | 1406.184881 | 1691.59126  |             |
| 795.6259518     | 880.9609218                                                                         | 878.1878899 | 1405.905014 |             |

|                                                  |                                                       |             |             |        |
|--------------------------------------------------|-------------------------------------------------------|-------------|-------------|--------|
| 851.5915879                                      | 0.723713377                                           | 5.41E-05    | 0.000999187 | PIGS   |
| 17                                               | 28553383                                              | 28571872    | - 5990      |        |
| protein_coding                                   | phosphatidylinositol glycan anchor biosynthesis class |             |             |        |
| S [Source:HGNC Symbol;Acc:HGNC:14937]            | -                                                     | 968         | 1517        | 1730   |
| 792                                              | 964 895                                               | 8.837781246 | 11.16587383 |        |
| 13.37894094                                      | 6.392924503                                           | 7.013080262 | 6.97496847  |        |
| ENSG00000121005                                  | 192.0556382                                           | 117.7227949 | 208.2710626 |        |
| 55.25180221                                      | 61.22861179                                           | 68.68508636 | 172.6831652 |        |
| 61.72183345                                      | 1.483034672                                           | 5.42E-05    | 0.000999647 |        |
| CRISPLD1                                         | 8 74984515                                            | 75034558    | + 4543      |        |
| protein_coding                                   | cysteine rich secretory protein LCCL domain           |             |             |        |
| containing 1 [Source:HGNC Symbol;Acc:HGNC:18206] | -                                                     |             |             | 166    |
| 127                                              | 213 55                                                | 67 70       | 1.998297127 |        |
| 1.232522744                                      | 2.171897485                                           | 0.585357476 | 0.642673901 |        |
| 0.719285556                                      |                                                       |             |             |        |
| ENSG00000137494                                  | 558.8124894                                           | 640.5232383 | 523.1221526 |        |
| 1084.94448                                       | 821.5600298                                           | 965.5160712 | 574.1526268 |        |
| 957.3401936                                      | -0.736961469                                          | 5.43E-05    | 0.001000562 |        |
| ANKRD42 11                                       | 83193739                                              | 83260694    | + 6724      |        |
| protein_coding                                   | ankyrin repeat domain 42 [Source:HGNC                 |             |             |        |
| Symbol;Acc:HGNC:26752]                           | -                                                     | 483 691     | 535 1080    | 899    |
| 984                                              | 3.928385856                                           | 4.530898158 | 3.685772565 |        |
| 7.765997872                                      | 5.826269704                                           | 6.831458423 |             |        |
| ENSG00000235655                                  | 1041.265508                                           | 817.5709062 | 932.819689  |        |
| 567.5866954                                      | 620.5108568                                           | 453.32157   | 930.5520345 |        |
| 547.1397074                                      | 0.765350225                                           | 5.53E-05    | 0.00101643  |        |
| H3F3AP4 2                                        | 174719908                                             | 174720318   | + 411       |        |
| processed_pseudogene                             | "H3 histone, family 3A, pseudogene 4                  |             |             |        |
| [Source:HGNC Symbol;Acc:HGNC:42980]"             | -                                                     | 900 882     |             | 954    |
| 565                                              | 679 462                                               | 119.7554812 | 94.6151585  |        |
| 107.5248904                                      | 66.46727015                                           | 71.99238315 | 52.47424389 |        |
| ENSG00000196352                                  | 101.8126275                                           | 125.138404  | 98.75764003 |        |
| 306.3963577                                      | 198.3075934                                           | 251.191173  | 108.5695572 |        |
| 251.9650414                                      | -1.21278037                                           | 5.54E-05    | 0.00101866  | CD55   |
| 1                                                | 207321376                                             | 207386804   | + 5908      |        |
| protein_coding                                   | CD55 molecule (Cromer blood group) [Source:HGNC       |             |             |        |
| Symbol;Acc:HGNC:2665]                            | -                                                     | 88 135      | 101 305     | 217    |
| 256                                              | 0.814585918                                           | 1.007458673 | 0.791923705 |        |
| 2.49609189                                       | 1.600581692                                           | 2.022765392 |             |        |
| ENSG00000128590                                  | 627.0732282                                           | 505.1883718 | 365.6966076 |        |
| 786.5847478                                      | 964.1221707                                           | 979.2530884 | 499.3194025 |        |
| 909.986669                                       | -0.867278088                                          | 5.60E-05    | 0.001027924 | DNAJB9 |
| 7                                                | 108569568                                             | 108574850   | + 2837      |        |
| protein_coding                                   | DnaJ heat shock protein family (Hsp40) member B9      |             |             |        |
| [Source:HGNC Symbol;Acc:HGNC:6968]               | -                                                     | 542 545     |             | 374    |
| 783                                              | 1055 998                                              | 10.44803608 | 8.469760393 |        |
| 6.106814417                                      | 13.34454107                                           | 16.20510023 | 16.421667   |        |
| ENSG00000069424                                  | 351.7163494                                           | 318.8711925 | 348.0962362 |        |
| 626.8568105                                      | 529.124869                                            | 599.5226824 | 339.5612593 |        |
| 585.1681207                                      | -0.785408548                                          | 5.63E-05    | 0.00103218  | KCNAB2 |

|                                                                       |                                                   |             |             |             |                |      |             |
|-----------------------------------------------------------------------|---------------------------------------------------|-------------|-------------|-------------|----------------|------|-------------|
| 1                                                                     | 5991466                                           | 6101193     | +           | 9534        | protein_coding |      |             |
| potassium voltage-gated channel subfamily A regulatory beta subunit 2 |                                                   |             |             |             |                |      |             |
| [Source:HGNC Symbol;Acc:HGNC:6229]                                    |                                                   |             |             |             |                |      |             |
|                                                                       | 624                                               | 579         | 611         | 1.743785848 | 1.590806119    | 304  | 344 356     |
| 1.729725971                                                           | 3.164540503                                       |             | 2.646439767 |             | 2.991659061    |      |             |
| ENSG00000159261                                                       | 30.08100357                                       |             | 75.08304241 |             | 17.60037149    |      |             |
| 154.7050462                                                           | 222.9818101                                       |             | 115.7834313 |             | 40.92147249    |      |             |
| 164.4900959                                                           | -2.001903842                                      |             | 5.68E-05    |             | 0.001040565    |      | CLDN14      |
|                                                                       | 21                                                | 36460621    | 36576569    |             | -              | 2853 |             |
| protein_coding                                                        | claudin 14 [Source:HGNC Symbol;Acc:HGNC:2035]     |             |             |             |                |      |             |
|                                                                       | 26                                                | 81          | 18          | 154         | 244            | 118  | 0.498386522 |
|                                                                       | 1.251748862                                       |             | 0.292262563 |             | 2.609877755    |      | 3.726890667 |
|                                                                       | 1.930751013                                       |             |             |             |                |      |             |
| ENSG00000136518                                                       | 2315.080313                                       |             | 2236.733103 |             | 2464.052009    |      |             |
| 1506.867333                                                           | 1657.741818                                       |             | 1663.160306 |             | 2338.621808    |      |             |
| 1609.256485                                                           | 0.539176872                                       |             | 5.84E-05    |             | 0.001067848    |      | ACTL6A      |
|                                                                       | 3                                                 | 179562880   | 179588408   |             | +              | 3675 |             |
| protein_coding                                                        | actin like 6A [Source:HGNC Symbol;Acc:HGNC:24124] |             |             |             |                |      |             |
|                                                                       | -                                                 | 2001        | 2413        | 2520        | 1500           | 1814 | 1695        |
| 29.77724114                                                           | 28.94902468                                       |             | 31.76476547 |             | 19.73490918    |      |             |
| 21.50990722                                                           | 21.53071216                                       |             |             |             |                |      |             |
| ENSG00000127526                                                       | 1995.758891                                       |             | 2220.047982 |             | 2147.245322    |      |             |
| 3093.096346                                                           | 3044.067252                                       |             | 2929.909541 |             | 2121.017398    |      |             |
| 3022.357713                                                           | -0.51066725                                       |             | 5.88E-05    |             | 0.001073567    |      |             |
| SLC35E1 19                                                            | 16549831                                          |             | 16572382    |             | -              | 7257 |             |
| protein_coding                                                        | solute carrier family 35 member E1 [Source:HGNC   |             |             |             |                |      |             |
| Symbol;Acc:HGNC:20803]                                                |                                                   |             |             |             |                |      |             |
|                                                                       | 2986                                              | 12.99950122 | 14.5506486  |             | 14.01772929    |      | 3331        |
| 20.51416207                                                           | 20.00212363                                       |             | 19.20784826 |             |                |      |             |
| ENSG00000158480                                                       | 500.9644056                                       |             | 411.5663065 |             | 549.5227099    |      |             |
| 836.8136589                                                           | 769.4700168                                       |             | 838.9392691 |             | 487.3511407    |      |             |
| 815.074315                                                            | -0.742373094                                      |             | 5.90E-05    |             | 0.001077089    |      | SPATA2      |
|                                                                       | 20                                                | 49903391    | 49915508    |             | -              | 4270 |             |
| protein_coding                                                        | spermatogenesis associated 2 [Source:HGNC         |             |             |             |                |      |             |
| Symbol;Acc:HGNC:14681]                                                |                                                   |             |             |             |                |      |             |
|                                                                       | 855                                               | 5.545679081 | 4.584469134 |             | 6.096925613    |      | 842         |
| 9.432316019                                                           | 8.592960476                                       |             | 9.347258978 |             |                |      |             |
| ENSG00000213923                                                       | 1004.242735                                       |             | 1488.683532 |             | 1258.426562    |      |             |
| 1941.849703                                                           | 1930.072061                                       |             | 2095.87635  |             | 1250.450943    |      |             |
| 1989.266038                                                           | -0.668914733                                      |             | 5.92E-05    |             | 0.001079128    |      | CSNK1E      |
|                                                                       | 22                                                | 38290691    | 38318084    |             | -              | 6246 |             |
| protein_coding                                                        | casein kinase 1 epsilon [Source:HGNC              |             |             |             |                |      |             |
| Symbol;Acc:HGNC:2453]                                                 |                                                   |             |             |             |                |      |             |
|                                                                       | 2136                                              | 7.599980151 | 11.33646154 |             | 9.545067915    |      | 2112        |
| 14.96342774                                                           | 14.73501328                                       |             | 15.96413179 |             |                |      |             |
| ENSG00000144395                                                       | 186.2708298                                       |             | 143.6774268 |             | 195.5596832    |      |             |
| 26.11903377                                                           | 84.07510872                                       |             | 50.04199149 |             | 175.1693133    |      |             |
| 53.41204466                                                           | 1.709733055                                       |             | 5.94E-05    |             | 0.001081119    |      |             |
| CCDC150 2                                                             | 196639554                                         |             | 196763490   |             | +              | 9683 |             |
| protein_coding                                                        | coiled-coil domain containing 150 [Source:HGNC    |             |             |             |                |      |             |

|                                                                                                      |              |             |             |             |                |             |
|------------------------------------------------------------------------------------------------------|--------------|-------------|-------------|-------------|----------------|-------------|
| Symbol;Acc:HGNC:26834]                                                                               | -            | 161         | 155         | 200         | 26             | 92          |
| 51                                                                                                   | 0.909307257  | 0.705757861 | 0.956802981 |             |                |             |
| 0.129826884                                                                                          | 0.414034464  | 0.245870418 |             |             |                |             |
| ENSG00000071282                                                                                      | 335.518886   | 341.1180198 | 489.8770065 |             |                |             |
| 218.9980524                                                                                          | 174.5472366  | 178.5812245 | 388.8379708 |             |                |             |
| 190.7088378                                                                                          | 1.028759632  | 6.01E-05    | 0.001090641 |             |                | LMCD1       |
| 3                                                                                                    | 8501707      | 8574673     | +           | 9130        | protein_coding | LIM         |
| and cysteine rich domains 1 [Source:HGNC Symbol;Acc:HGNC:6633] -                                     |              |             |             |             |                |             |
| 290                                                                                                  | 368          | 501         | 218         | 191         | 182            | 1.737088452 |
|                                                                                                      | 1.777096449  | 2.54196405  | 1.154481379 | 0.911635413 |                |             |
|                                                                                                      | 0.930564855  |             |             |             |                |             |
| ENSG00000099250                                                                                      | 5275.745241  | 4314.03061  | 4194.755205 |             |                |             |
| 6502.634831                                                                                          | 6400.674581  | 7116.756163 | 4594.843685 |             |                |             |
| 6673.355192                                                                                          | -0.538622678 | 6.01E-05    | 0.001090641 |             |                | NRP1        |
| 10                                                                                                   | 33177492     | 33336262    | -           | 11522       |                |             |
| protein_coding neuropilin 1 [Source:HGNC Symbol;Acc:HGNC:8004] -                                     |              |             |             |             |                |             |
| 4560                                                                                                 | 4654         | 4290        | 6473        | 7004        | 7253           | 21.64370892 |
|                                                                                                      | 17.80871017  | 17.2477273  | 27.16307624 | 26.48968929 |                |             |
|                                                                                                      | 29.38568659  |             |             |             |                |             |
| ENSG00000136122                                                                                      | 389.8960847  | 437.5209385 | 538.7669273 |             |                |             |
| 245.1170862                                                                                          | 258.6223453  | 144.2386814 | 455.3946502 |             |                |             |
| 215.9927043                                                                                          | 1.076197875  | 6.01E-05    | 0.001090641 |             |                | BORA        |
| 13                                                                                                   | 72727749     | 72756198    | +           | 3189        |                |             |
| protein_coding "bora, aurora kinase A activator [Source:HGNC Symbol;Acc:HGNC:24724]" -               |              |             |             |             |                |             |
| 147                                                                                                  | 5.779231539  | 6.525614846 | 8.003860956 |             |                | 283         |
| 3.699444562                                                                                          | 3.867145513  | 2.151834426 |             |             |                |             |
| ENSG00000150995                                                                                      | 4382.570828  | 5442.130148 | 2502.186147 |             |                |             |
| 6540.808804                                                                                          | 7564.018205  | 7922.334104 | 4108.962374 |             |                |             |
| 7342.387038                                                                                          | -0.837467763 | 6.04E-05    | 0.001093417 |             |                | ITPR1       |
| 3                                                                                                    | 4493345      | 4847840     | +           | 32454       |                |             |
| protein_coding "inositol 1,4,5-trisphosphate receptor type 1 [Source:HGNC Symbol;Acc:HGNC:6180]" -   |              |             |             |             |                |             |
| 6511                                                                                                 | 8277         | 8074        | 6.383170592 | 7.975865221 |                | 2559        |
| 3.652620144                                                                                          | 9.700199806  | 11.11381904 | 11.61359158 |             |                |             |
| ENSG00000136982                                                                                      | 1294.640115  | 1159.615877 | 1140.112953 |             |                |             |
| 824.7587203                                                                                          | 724.6908828  | 774.1790449 | 1198.122982 |             |                |             |
| 774.5428826                                                                                          | 0.62919498   | 6.05E-05    | 0.001093417 |             |                | DSCC1       |
| 8                                                                                                    | 119833976    | 119856010   | -           | 2603        |                |             |
| protein_coding DNA replication and sister chromatid cohesion 1 [Source:HGNC Symbol;Acc:HGNC:24453] - |              |             |             |             |                |             |
| 821                                                                                                  | 793          | 789         | 23.50989184 | 21.1893239  |                | 1166        |
| 20.75041745                                                                                          | 15.25001271  | 13.27570572 | 14.14975339 |             |                |             |
| ENSG00000164692                                                                                      | 17593.9162   | 7898.550671 | 21867.48378 |             |                |             |
| 5889.842116                                                                                          | 4233.912812  | 5385.891986 | 15786.65022 |             |                |             |
| 5169.882305                                                                                          | 1.610500667  | 6.05E-05    | 0.001093417 |             |                | COL1A2      |
| 7                                                                                                    | 94394561     | 94431232    | +           | 11156       |                |             |
| protein_coding collagen type I alpha 2 chain [Source:HGNC Symbol;Acc:HGNC:2198] -                    |              |             |             |             |                |             |
| 5489                                                                                                 | 74.5469283   | 33.67565237 | 92.86315482 |             |                | 4633        |



|                        |                                                    |             |             |             |            |
|------------------------|----------------------------------------------------|-------------|-------------|-------------|------------|
| 25.41046457            | 18.09724194                                        | 22.96840096 |             |             |            |
| ENSG00000111725        | 790.2048245                                        | 982.5682093 | 773.4385472 |             |            |
| 1306.956267            | 1304.991905                                        | 1378.607805 | 848.7371937 |             |            |
| 1330.185326            | -0.647614838                                       | 6.09E-05    | 0.001098605 | PRKAB1      |            |
| 12                     | 119667753                                          | 119681630   | + 6246      |             |            |
| protein_coding         | protein kinase AMP-activated non-catalytic subunit |             |             |             |            |
| beta 1 [Source:HGNC    | Symbol;Acc:HGNC:9378]                              |             |             |             |            |
|                        |                                                    |             | - 683       | 1060        |            |
| 791                    | 1301                                               | 1428        | 1405        | 5.980168713 | 7.48234697 |
| 5.866471422            | 10.0710913                                         | 9.9628783   | 10.50075148 |             |            |
| ENSG00000169136        | 882.7617586                                        | 944.5632125 | 980.7318114 |             |            |
| 1490.794081            | 1307.733485                                        | 1461.029908 | 936.0189275 |             |            |
| 1419.852492            | -0.600661704                                       | 6.11E-05    | 0.001101977 | ATF5        |            |
| 19                     | 49928702                                           | 49933935    | + 2954      |             |            |
| protein_coding         | activating transcription factor 5 [Source:HGNC     |             |             |             |            |
| Symbol;Acc:HGNC:790]   | TF_bZIP                                            | 763         | 1019        | 1003        | 1484       |
| 1489                   | 14.12566036                                        | 15.20889463 | 15.72870249 | 1431        |            |
| 24.28983846            | 21.10997605                                        | 23.53045053 |             |             |            |
| ENSG00000075239        | 1464.713481                                        | 1587.867304 | 1719.947414 |             |            |
| 957.3630456            | 1000.676566                                        | 1154.890666 | 1590.842733 |             |            |
| 1037.643426            | 0.616747653                                        | 6.13E-05    | 0.0011033   | ACAT1       |            |
| 11                     | 108121516                                          | 108147776   | + 5584      |             |            |
| protein_coding         | acetyl-CoA acetyltransferase 1 [Source:HGNC        |             |             |             |            |
| Symbol;Acc:HGNC:93]    | -                                                  | 1266        | 1713        | 1759        | 953        |
| 1177                   | 12.39889576                                        | 13.525269   | 14.59227097 | 1095        |            |
| 8.251800269            | 8.545299866                                        | 9.839591962 |             |             |            |
| ENSG00000123395        | 307.7518057                                        | 538.5586128 | 454.6762635 |             |            |
| 780.5572785            | 726.5186025                                        | 912.5304331 | 433.6622274 |             |            |
| 806.5354381            | -0.893115362                                       | 6.15E-05    | 0.001106254 | ATG101      |            |
| 12                     | 52069246                                           | 52077494    | + 3199      |             |            |
| protein_coding         | autophagy related 101 [Source:HGNC                 |             |             |             |            |
| Symbol;Acc:HGNC:25679] | -                                                  | 266         | 581         | 465         | 777        |
| 930                    | 4.547389025                                        | 8.007479773 | 6.733504716 | 795         |            |
| 11.74378239            | 10.82957682                                        | 13.57109043 |             |             |            |
| ENSG00000119912        | 1515.619795                                        | 1245.822333 | 1390.429348 |             |            |
| 985.4912358            | 822.4738897                                        | 850.7138554 | 1383.957159 |             |            |
| 886.226327             | 0.642850625                                        | 6.17E-05    | 0.001107694 | IDE         |            |
| 10                     | 92451684                                           | 92574076    | - 7607      |             |            |
| protein_coding         | insulin degrading enzyme [Source:HGNC              |             |             |             |            |
| Symbol;Acc:HGNC:5381]  | -                                                  | 1310        | 1344        | 1422        | 981        |
| 867                    | 9.417867849                                        | 7.789683465 | 8.659416642 | 900         |            |
| 6.235292161            | 5.15570062                                         | 5.320491051 |             |             |            |
| ENSG00000198890        | 1357.116046                                        | 1590.648158 | 1341.539427 |             |            |
| 2248.246061            | 2443.661312                                        | 1893.745953 | 1429.767877 |             |            |
| 2195.217775            | -0.61838616                                        | 6.17E-05    | 0.001107694 | PRMT6       |            |
| 1                      | 107056679                                          | 107067636   | + 4335      |             |            |
| protein_coding         | protein arginine methyltransferase 6 [Source:HGNC  |             |             |             |            |
| Symbol;Acc:HGNC:18241] | -                                                  | 1173        | 1716        | 1372        | 2238       |
| 1930                   | 14.79802045                                        | 17.45268056 | 14.6611307  | 2674        |            |
| 24.9615872             | 26.88010116                                        | 20.78328739 |             |             |            |
| ENSG00000106608        | 1256.46038                                         | 1376.522444 | 1362.073194 |             |            |

|                              |                                                   |             |                |                   |
|------------------------------|---------------------------------------------------|-------------|----------------|-------------------|
| 2045.32126                   | 1901.742405                                       | 1898.65203  | 1331.685339    |                   |
| 1948.571898                  | -0.548801563                                      | 6.24E-05    | 0.001117779    | URGCP             |
| 7                            | 43875894                                          | 43926411    | - 7830         |                   |
| protein_coding               | upregulator of cell proliferation [Source:HGNC    |             |                |                   |
| Symbol;Acc:HGNC:30890]       | -                                                 | 1086 1485   | 1393 2036      | 2081              |
| 1935                         | 7.585125589                                       | 8.361778317 | 8.241225737    |                   |
| 12.57237216                  | 11.58160945                                       | 11.53626552 |                |                   |
| ENSG00000133466              | 260.316377                                        | 199.2944953 | 339.2960504    |                   |
| 123.5631213                  | 97.78300688                                       | 122.6519399 | 266.3023076    |                   |
| 114.6660227                  | 1.216093095                                       | 6.36E-05    | 0.00113922     |                   |
| C1QTNF6 22                   | 37180167                                          | 37199385    | - 7143         |                   |
| protein_coding               | C1q and TNF related 6 [Source:HGNC                |             |                |                   |
| Symbol;Acc:HGNC:14343]       | -                                                 | 225 215     | 347 123        | 107               |
| 125                          | 1.722648145                                       | 1.327063694 | 2.250356273    |                   |
| 0.832579432                  | 0.652772312                                       | 0.816912231 |                |                   |
| ENSG00000160352              | 195.5265232                                       | 182.6093747 | 287.4727344    |                   |
| 92.42119643                  | 71.28107044                                       | 104.0088451 | 221.8695441    |                   |
| 89.23703731                  | 1.315305497                                       | 6.46E-05    | 0.001154347    | ZNF714            |
| 19                           | 21082159                                          | 21125270    | + 8033         |                   |
| protein_coding               | zinc finger protein 714 [Source:HGNC              |             |                |                   |
| Symbol;Acc:HGNC:27124]       | zf-C2H2                                           | 169 197     | 294 92         | 78                |
| 106                          | 1.150545109                                       | 1.08124078  | 1.695399377    |                   |
| 0.55374686                   | 0.423131574                                       | 0.61599067  |                |                   |
| ENSG00000146950              | 189.7417148                                       | 291.9896094 | 372.5411966    |                   |
| 94.43035287                  | 128.8542427                                       | 131.4828796 | 284.7575069    |                   |
| 118.2558251                  | 1.268693236                                       | 6.66E-05    | 0.001190001    |                   |
| SHROOM2 X                    | 9786456 9949443                                   | + 8191      | protein_coding | shroom            |
| family member 2 [Source:HGNC | Symbol;Acc:HGNC:630]                              |             | -              | 164               |
| 315                          | 381 94                                            | 141 134     | 1.094968523    |                   |
| 1.695538228                  | 2.154718327                                       | 0.554871149 | 0.750137341    |                   |
| 0.763684381                  |                                                   |             |                |                   |
| ENSG00000084636              | 1309.680617                                       | 1199.474776 | 2961.751403    |                   |
| 462.1059821                  | 229.3788292                                       | 512.1945012 | 1823.635599    |                   |
| 401.2264375                  | 2.184545783                                       | 6.72E-05    | 0.001198328    |                   |
| COL16A1 1                    | 31652247                                          | 31704319    | - 9269         |                   |
| protein_coding               | collagen type XVI alpha 1 chain [Source:HGNC      |             |                |                   |
| Symbol;Acc:HGNC:2193]        | -                                                 | 1132 1294   | 3029 460       | 251               |
| 522                          | 6.678951002                                       | 6.155103387 | 15.13801206    |                   |
| 2.3995299                    | 1.180047358                                       | 2.628958053 |                |                   |
| ENSG00000253729              | 15112.23341                                       | 14627.289   | 18782.52978    |                   |
| 11830.91772                  | 8243.016094                                       | 11316.35859 | 16174.0174     |                   |
| 10463.4308                   | 0.628377831                                       | 6.73E-05    | 0.001198858    | PRKDC             |
| 8                            | 47773108                                          | 47960183    | - 15417        |                   |
| protein_coding               | "protein kinase, DNA-activated, catalytic subunit |             |                |                   |
| [Source:HGNC                 | Symbol;Acc:HGNC:9413]"                            |             | -              | 13062 15780 19209 |
| 11777                        | 9020 11533                                        | 46.33450415 | 45.12748021    |                   |
| 57.71747718                  | 36.93482275                                       | 25.49560153 | 34.92114343    |                   |
| ENSG00000150556              | 111.0683209                                       | 126.9923063 | 234.6716199    |                   |
| 65.29758443                  | 29.24351608                                       | 45.1359139  | 157.5774157    |                   |
| 46.5590048                   | 1.762310699                                       | 6.81E-05    | 0.001211877    | LYPD6B            |

|                        |                                                   |              |          |             |                    |
|------------------------|---------------------------------------------------|--------------|----------|-------------|--------------------|
| 2                      | 149038107                                         | 149215262    | +        | 3771        |                    |
| protein_coding         | LY6/PLAUR domain containing 6B                    | [Source:HGNC |          |             |                    |
| Symbol;Acc:HGNC:27018] | -                                                 | 96           | 137      | 240         | 65 32              |
| 46                     | 1.392224953                                       | 1.601762024  |          | 2.948201516 |                    |
| 0.833408721            | 0.369787344                                       | 0.569439167  |          |             |                    |
| ENSG00000233968        | 70.57466222                                       | 34.29719221  |          | 46.93432398 |                    |
| 8.036625776            | 5.483159264                                       | 7.849724156  |          | 50.60205947 |                    |
| 7.123169732            | 2.828892811                                       | 6.86E-05     |          | 0.001218729 |                    |
| AL157895.1             | 10                                                | 19710328     | 19728550 | -           | 2151               |
| antisense              | uncharacterized LOC101928834                      | [Source:NCBI |          |             |                    |
| gene;Acc:101928834]    | -                                                 | 61           | 37       | 48          | 8 6                |
| 8                      | 1.550901219                                       | 0.758394669  |          | 1.033720866 |                    |
| 0.1798253              | 0.121554051                                       | 0.173618345  |          |             |                    |
| ENSG00000123933        | 529.8884475                                       | 846.3063916  |          | 605.2572196 |                    |
| 1284.855546            | 1023.523063                                       | 1137.228787  |          | 660.4840196 |                    |
| 1148.535799            | -0.796817302                                      | 6.91E-05     |          | 0.001226    | MXD4               |
| 4                      | 2247432                                           | 2262294      | -        | 7058        | protein_coding MAX |
| dimerization protein 4 | [Source:HGNC Symbol;Acc:HGNC:13906]               |              |          |             | bHLH               |
| 458                    | 913                                               | 619          | 1279     | 1120        | 1159 3.548775586   |
| 5.703258829            | 4.062669099                                       | 8.761734863  |          | 6.915044295 |                    |
| 7.665629375            |                                                   |              |          |             |                    |
| ENSG00000152377        | 2401.852439                                       | 1265.288307  |          | 2040.665295 |                    |
| 1229.603744            | 975.0884892                                       | 985.1403815  |          | 1902.602014 |                    |
| 1063.277538            | 0.839077074                                       | 6.94E-05     |          | 0.00123119  | SPOCK1             |
| 5                      | 136975298                                         | 137598379    | -        | 6222        |                    |
| protein_coding         | "SPARC (osteonectin), cwcv and kazal like domains |              |          |             |                    |
| proteoglycan 1         | [Source:HGNC Symbol;Acc:HGNC:11251]"              |              |          |             | 2076               |
| 1365                   | 2087                                              | 1224         | 1067     | 1004        | 18.2470245         |
| 9.672452432            | 15.53799216                                       | 9.511579179  |          | 7.47296607  |                    |
| 7.532683877            |                                                   |              |          |             |                    |
| ENSG00000183160        | 915.1566855                                       | 1043.746985  |          | 1529.276723 |                    |
| 626.8568105            | 616.8554173                                       | 733.9492086  |          | 1162.726798 |                    |
| 659.2204788            | 0.819202275                                       | 7.00E-05     |          | 0.001239658 |                    |
| TMEM119 12             | 108589846                                         | 108598320    | -        | 3189        |                    |
| protein_coding         | transmembrane protein 119                         | [Source:HGNC |          |             |                    |
| Symbol;Acc:HGNC:27884] | -                                                 | 791          | 1126     | 1564        | 624 675            |
| 748                    | 13.56490251                                       | 15.56746254  |          | 22.71876322 |                    |
| 9.460874617            | 9.223756966                                       | 10.94947041  |          |             |                    |
| ENSG00000231500        | 28671.82425                                       | 36138.11718  |          | 33144.43291 |                    |
| 41159.57891            | 47581.02838                                       | 61945.11696  |          | 32651.45811 |                    |
| 50228.57475            | -0.621338652                                      | 7.03E-05     |          | 0.001244066 | RPS18              |
| 6                      | 33272010                                          | 33276510     | +        | 1898        |                    |
| protein_coding         | ribosomal protein S18                             | [Source:HGNC |          |             |                    |
| Symbol;Acc:HGNC:10401] | -                                                 | 24782        | 38986    | 33897       | 40972 52066        |
| 63131                  | 714.0602494                                       | 905.6208827  |          | 827.308547  |                    |
| 1043.739627            | 1195.409227                                       | 1552.717674  |          |             |                    |
| ENSG00000187601        | 127.2657843                                       | 173.3398633  |          | 61.60130022 |                    |
| 235.071304             | 371.9409701                                       | 355.200018   |          | 120.7356493 |                    |
| 320.7374307            | -1.409284714                                      | 7.07E-05     |          | 0.001250001 | MAGEH1             |
| X                      | 55452105                                          | 55453566     | +        | 1462        |                    |

|                                   |                                                     |              |             |             |             |                |       |
|-----------------------------------|-----------------------------------------------------|--------------|-------------|-------------|-------------|----------------|-------|
| protein_coding                    | MAGE family member H1 [Source:HGNC                  |              |             |             |             |                |       |
| Symbol;Acc:HGNC:24092]            | -                                                   | 110          | 187         | 63          | 234         | 407            |       |
|                                   | 362                                                 | 4.114717515  | 5.639338865 | 1.996161305 |             |                |       |
| 7.738730118                       |                                                     | 12.13125228  | 11.5586532  |             |             |                |       |
| ENSG00000145247                   |                                                     | 859.6225251  | 1186.49746  | 906.4191318 |             |                |       |
| 1516.913115                       |                                                     | 1481.366861  | 1722.033237 | 984.1797057 |             |                |       |
| 1573.437738                       |                                                     | -0.676114028 | 7.09E-05    | 0.001250001 |             | OCIAD2         |       |
|                                   | 4                                                   | 48885019     | 48906937    | -           | 2483        |                |       |
| protein_coding                    | OCIA domain containing 2 [Source:HGNC               |              |             |             |             |                |       |
| Symbol;Acc:HGNC:28685]            | -                                                   | 743          | 1280        | 927         | 1510        | 1621           |       |
|                                   | 1755                                                | 16.36465323  | 22.72831334 | 17.29439884 |             |                |       |
| 29.40366352                       |                                                     | 28.44886164  | 32.99487118 |             |             |                |       |
| ENSG00000143322                   |                                                     | 5561.514775  | 4892.448121 | 4456.805181 |             |                |       |
| 7634.794487                       |                                                     | 6936.19647   | 6808.65449  | 4970.256026 |             |                |       |
| 7126.548482                       |                                                     | -0.520037031 | 7.09E-05    | 0.001250001 |             | ABL2           |       |
|                                   | 1                                                   | 179099327    | 179229684   | -           | 13257       |                |       |
| protein_coding                    | "ABL proto-oncogene 2, non-receptor tyrosine kinase |              |             |             |             |                |       |
| [Source:HGNC Symbol;Acc:HGNC:77]" | -                                                   |              |             | 4807        | 5278        | 4558           |       |
|                                   | 7600                                                | 7590         | 6939        | 19.83003947 | 17.5532722  |                |       |
| 15.9269098                        |                                                     | 27.71848902  | 24.94911342 | 24.43417427 |             |                |       |
| ENSG00000148926                   |                                                     | 3239.492692  | 3628.086765 | 2405.384104 |             |                |       |
| 4334.755028                       |                                                     | 6150.276975  | 4608.769295 | 3090.987854 |             |                |       |
| 5031.267099                       |                                                     | -0.702929601 | 7.11E-05    | 0.001250702 |             | ADM            |       |
|                                   | 11                                                  | 10304680     | 10307397    | +           | 2718        |                |       |
| protein_coding                    | adrenomedullin [Source:HGNC Symbol;Acc:HGNC:259]    |              |             |             |             |                |       |
|                                   | -                                                   | 2800         | 3914        | 2460        | 4315        | 6730           | 4697  |
| 56.33824209                       |                                                     | 63.48999997  | 41.92645185 | 76.75957547 |             |                |       |
| 107.9006869                       |                                                     | 80.67094485  |             |             |             |                |       |
| ENSG00000150991                   |                                                     | 13751.64648  | 12081.88117 | 10502.53279 |             |                |       |
| 17656.46683                       |                                                     | 17402.63365  | 16807.24063 | 12112.02015 |             |                |       |
| 17288.78037                       |                                                     | -0.513476826 | 7.11E-05    | 0.001250702 |             | UBC            |       |
|                                   | 12                                                  | 124911604    | 124917368   | -           | 3898        |                |       |
| protein_coding                    | ubiquitin C [Source:HGNC Symbol;Acc:HGNC:12468]     |              |             |             |             |                |       |
|                                   | -                                                   | 11886        | 13034       | 10741       | 17576       | 19043          | 17129 |
|                                   |                                                     | 147.4245599  | 127.6454497 | 218.0115113 | 212.8884649 |                |       |
|                                   |                                                     | 205.1333207  |             |             |             |                |       |
| ENSG00000183137                   |                                                     | 500.9644056  | 329.9946061 | 445.8760778 |             |                |       |
| 194.8881751                       |                                                     | 202.8768928  | 247.2663109 | 425.6116965 |             |                |       |
| 215.0104596                       |                                                     | 0.984083911  | 7.13E-05    | 0.001253426 |             |                |       |
| CEP57L1                           | 6                                                   | 109095110    | 109163932   | +           | 6432        |                |       |
| protein_coding                    | centrosomal protein 57 like 1 [Source:HGNC          |              |             |             |             |                |       |
| Symbol;Acc:HGNC:21561]            | -                                                   | 433          | 356         | 456         | 194         | 222            |       |
|                                   | 252                                                 | 3.681599763  | 2.440270221 | 3.284136977 |             |                |       |
| 1.458333696                       |                                                     | 1.504061299  | 1.828944559 |             |             |                |       |
| ENSG00000101224                   |                                                     | 1620.903308  | 1675.927663 | 2408.317499 |             |                |       |
| 1178.370254                       |                                                     | 1138.669407  | 1207.876304 | 1901.716156 |             |                |       |
| 1174.971989                       |                                                     | 0.694949501  | 7.16E-05    | 0.001256393 |             | CDC25B         |       |
|                                   | 20                                                  | 3786772      | 3806121     | +           | 4314        | protein_coding | cell  |
| division cycle                    | 25B [Source:HGNC Symbol;Acc:HGNC:1726]              |              |             |             |             |                |       |
|                                   | -                                                   |              |             |             |             |                | 1401  |
|                                   | 1808                                                | 2463         | 1173        | 1246        | 1231        | 17.76039855    |       |

|                         |                       |                           |              |        |
|-------------------------|-----------------------|---------------------------|--------------|--------|
| 18.4778843              | 26.44762795           | 13.14677069               | 12.58625421  |        |
| 13.32060493             |                       |                           |              |        |
| ENSG00000108786         | 126.1088227           | 89.91426066               | 123.2026004  |        |
| 387.7671937             | 205.6184724           | 234.5105092               | 113.0752279  |        |
| 275.9653918             | -1.288248795          | 7.20E-05                  | 0.001262195  |        |
| HSD17B1                 | 42549214              | 42555213                  | + 5658       |        |
| protein_coding          | hydroxysteroid        | 17-beta dehydrogenase 1   | [Source:HGNC |        |
| Symbol;Acc:HGNC:5210]   | -                     | 109 97                    | 126 386      | 225    |
| 239                     | 1.053557559           | 0.755862412               | 1.03159697   |        |
| 3.298569037             | 1.732918638           | 1.971882322               |              |        |
| ENSG00000131351         | 401.4657015           | 535.7777594               | 600.3682275  |        |
| 316.4421399             | 257.7084854           | 221.7547074               | 512.5372295  |        |
| 265.3017776             | 0.951243448           | 7.26E-05                  | 0.001271288  | HAUS8  |
| 19                      | 17049729              | 17075625                  | - 5533       |        |
| protein_coding          | HAUS augmin           | like complex subunit 8    | [Source:HGNC |        |
| Symbol;Acc:HGNC:30532]  | -                     | 347 578                   | 614 315      | 282    |
| 226                     | 3.429758312           | 4.605758117               | 5.140556735  |        |
| 2.752650671             | 2.220992213           | 1.906750218               |              |        |
| ENSG00000146263         | 1218.280645           | 930.6589454               | 1062.866878  |        |
| 599.7331985             | 579.3871623           | 756.5171655               | 1070.602156  |        |
| 645.2125088             | 0.7301515             | 7.27E-05                  | 0.001271288  | MMS22L |
| 6                       | 97142161              | 97283217                  | - 21793      |        |
| protein_coding          | "MMS22 like, DNA      | repair protein            | [Source:HGNC |        |
| Symbol;Acc:HGNC:21475]" | -                     | 1053 1004                 | 1087 597     | 634    |
| 771                     | 2.64244566            | 2.031190478               | 2.310547925  |        |
| 1.324520025             | 1.267741878           | 1.651518318               |              |        |
| ENSG00000198554         | 1192.827488           | 1120.683929               | 1167.491309  |        |
| 719.278007              | 812.421431            | 745.7237948               | 1160.334242  |        |
| 759.1410776             | 0.611717652           | 7.30E-05                  | 0.001275493  | WDHD1  |
| 14                      | 54938950              | 55027105                  | - 6385       |        |
| protein_coding          | WD repeat and HMG-box | DNA binding protein 1     | [Source:HGNC |        |
| Symbol;Acc:HGNC:23170]  | -                     | HMG                       | 1031 1209    | 1194   |
| 716                     | 889 760               | 8.830646024               | 8.348325181  |        |
| 8.662552526             | 5.421922895           | 6.067355711               | 5.556466835  |        |
| ENSG00000167363         | 128.422746            | 139.0426711               | 102.6688337  |        |
| 218.9980524             | 312.5400781           | 283.5712851               | 123.3780836  |        |
| 271.7031385             | -1.139440336          | 7.42E-05                  | 0.001294712  | FN3K   |
| 17                      | 82735575              | 82751197                  | + 3872       |        |
| protein_coding          | fructosamine 3 kinase | [Source:HGNC              |              |        |
| Symbol;Acc:HGNC:24822]  | -                     | 111 150                   | 105 218      | 342    |
| 289                     | 1.567769975           | 1.708007874               | 1.256193108  |        |
| 2.722214616             | 3.849012798           | 3.484243752               |              |        |
| ENSG00000138172         | 490.5517505           | 417.1280134               | 676.636504   |        |
| 252.1491337             | 256.7946256           | 311.0453197               | 528.1054226  |        |
| 273.329693              | 0.950321881           | 7.43E-05                  | 0.001295489  | CALHM2 |
| 10                      | 103446786             | 103452402                 | - 3108       |        |
| protein_coding          | calcium homeostasis   | modulator family member 2 | [Source:HGNC |        |
| Symbol;Acc:HGNC:23493]  | -                     |                           | 424 450      | 692    |
| 251                     | 281 317               | 7.460699693               | 6.383596995  |        |
| 10.31400981             | 3.904756242           | 3.939888284               | 4.761286203  |        |

|                                                                  |              |             |             |                |      |
|------------------------------------------------------------------|--------------|-------------|-------------|----------------|------|
| ENSG00000132383                                                  | 3741.614059  | 3745.80956  | 4003.106716 |                |      |
| 2551.628684                                                      | 2954.508984  | 2552.141566 | 3830.176778 |                |      |
| 2686.093078                                                      | 0.511815985  | 7.49E-05    | 0.001304379 | RPA1           |      |
| 17                                                               | 1829702      | 1900082 +   | 5492        | protein_coding |      |
| replication protein A1 [Source:HGNC Symbol;Acc:HGNC:10289] -     |              |             |             |                |      |
| 3234                                                             | 4041         | 4094        | 2540        | 3233           | 2601 |
| 32.44085411                                                      | 34.53184362  | 22.36167877 | 25.65274085 |                |      |
| 22.10832598                                                      |              |             |             |                |      |
| ENSG00000149503                                                  | 1755.110862  | 2209.85152  | 3421.316658 |                |      |
| 1496.821551                                                      | 1187.103981  | 1462.99234  | 2462.093013 |                |      |
| 1382.305957                                                      | 0.833215556  | 7.59E-05    | 0.001319395 | INCENP         |      |
| 11                                                               | 62123973     | 62153163    | + 4473      |                |      |
| protein_coding inner centromere protein [Source:HGNC             |              |             |             |                |      |
| Symbol;Acc:HGNC:6058] - 1517 2384 3499 1490 1299                 |              |             |             |                |      |
| 1491                                                             | 18.54732984  | 23.49856333 | 36.23660485 |                |      |
| 16.10603308                                                      | 12.65519527  | 15.56054419 |             |                |      |
| ENSG00000142949                                                  | 1409.179321  | 1862.244842 | 2265.55893  |                |      |
| 1123.118452                                                      | 804.1966921  | 1241.237632 | 1845.661031 |                |      |
| 1056.184259                                                      | 0.805916054  | 7.65E-05    | 0.001326817 | PTPRF          |      |
| 1                                                                | 43525187     | 43623666    | + 10712     |                |      |
| protein_coding "protein tyrosine phosphatase, receptor type F    |              |             |             |                |      |
| [Source:HGNC Symbol;Acc:HGNC:9670]" - 1218 2009 2317             |              |             |             |                |      |
| 1118                                                             | 880          | 1265        | 6.218296655 | 8.268816052    |      |
| 10.01977399                                                      | 5.046292918  | 3.579898438 | 5.512720797 |                |      |
| ENSG00000100242                                                  | 1066.718665  | 1343.152203 | 2190.268452 |                |      |
| 698.1818643                                                      | 735.6572013  | 979.2530884 | 1533.379773 |                |      |
| 804.3640514                                                      | 0.931214229  | 7.65E-05    | 0.001326817 | SUN2           |      |
| 22                                                               | 38734725     | 38794143    | - 6489      |                |      |
| protein_coding Sad1 and UNC84 domain containing 2 [Source:HGNC   |              |             |             |                |      |
| Symbol;Acc:HGNC:14210] - 922 1449 2240 695 805                   |              |             |             |                |      |
| 998                                                              | 7.770480227  | 9.845200595 | 15.99089236 |                |      |
| 5.178550872                                                      | 5.406008248  | 7.179576096 |             |                |      |
| ENSG00000143933                                                  | 8400.698727  | 7937.482619 | 8208.617704 |                |      |
| 5648.743342                                                      | 6407.071601  | 5674.369349 | 8182.26635  |                |      |
| 5910.061431                                                      | 0.4692372    | 7.75E-05    | 0.001343186 | CALM2          |      |
| 2                                                                | 47160082     | 47176601    | - 6466      |                |      |
| protein_coding calmodulin 2 [Source:HGNC Symbol;Acc:HGNC:1445] - |              |             |             |                |      |
| 7261                                                             | 8563         | 8395        | 5623        | 7011           | 5783 |
| 58.38808098                                                      | 60.14332802  | 42.04686299 | 47.25011443 |                |      |
| 41.75067755                                                      |              |             |             |                |      |
| ENSG00000174840                                                  | 2537.216955  | 2462.909181 | 2158.001104 |                |      |
| 3415.565955                                                      | 3666.405828  | 3232.123921 | 2386.042414 |                |      |
| 3438.031901                                                      | -0.527165202 | 7.78E-05    | 0.001347106 | PDE12          |      |
| 3                                                                | 57556276     | 57566844    | + 8947      |                |      |
| protein_coding phosphodiesterase 12 [Source:HGNC                 |              |             |             |                |      |
| Symbol;Acc:HGNC:25386] - 2193 2657 2207 3400 4012                |              |             |             |                |      |
| 3294                                                             | 13.40466322  | 13.09326853 | 11.42687171 |                |      |
| 18.37395702                                                      | 19.54078853  | 17.18668801 |             |                |      |
| ENSG00000126062                                                  | 968.3769226  | 1799.212164 | 1505.809561 |                |      |
| 2347.699305                                                      | 2311.15163   | 2664.981351 | 1424.466216 |                |      |

|                                   |                                                        |             |             |             |             |
|-----------------------------------|--------------------------------------------------------|-------------|-------------|-------------|-------------|
| 2441.277429                       | -0.7763446                                             | 7.81E-05    | 0.001350362 |             |             |
| TMEM115 3                         | 50354749                                               | 50359610    | -           | 2197        |             |
| protein_coding                    | transmembrane protein 115 [Source:HGNC                 |             |             |             |             |
| Symbol;Acc:HGNC:30055]            | -                                                      | 837         | 1941        | 1540        | 2337 2529   |
| 2716                              | 20.83483732                                            | 38.95197084 | 32.4708098  |             |             |
| 51.43158068                       | 50.1622918                                             | 57.70929177 |             |             |             |
| ENSG00000178719                   | 3408.409097                                            | 4281.58732  | 3836.880985 |             |             |
| 5261.980727                       | 5474.934526                                            | 5814.683168 | 3842.292467 |             |             |
| 5517.199474                       | -0.521715134                                           | 7.91E-05    | 0.001366351 |             | GRINA       |
| 8                                 | 143990058                                              | 143993415   | +           | 2527        |             |
| protein_coding                    | glutamate ionotropic receptor NMDA type subunit        |             |             |             |             |
| associated protein 1 [Source:HGNC | Symbol;Acc:HGNC:4589] - 2946                           |             |             |             |             |
| 4619                              | 3924                                                   | 5238        | 5991        | 5926        | 63.75616903 |
| 80.58916914                       | 71.93267527                                            | 100.2216316 | 103.3124535 |             |             |
| 109.4718459                       |                                                        |             |             |             |             |
| ENSG00000188985                   | 322.7923075                                            | 366.1457006 | 416.5421253 |             |             |
| 190.8698622                       | 199.2214533                                            | 190.3558108 | 368.4933778 |             |             |
| 193.4823754                       | 0.930024702                                            | 7.95E-05    | 0.001372334 |             | DHFRP1      |
| 18                                | 26170726                                               | 26171284    | -           | 559         |             |
| processed_pseudogene              | dihydrofolate reductase pseudogene 1                   |             |             |             |             |
| [Source:HGNC                      | Symbol;Acc:HGNC:2862] - 426                            |             |             |             |             |
| 190                               | 218                                                    | 194         | 27.29525199 | 31.15438953 |             |
| 35.30207612                       | 16.43398967                                            | 16.99430011 | 16.20078124 |             |             |
| ENSG00000136378                   | 59.00504546                                            | 27.80853423 | 78.22387329 |             |             |
| 12.05493866                       | 2.741579632                                            | 5.887293117 | 55.01248433 |             |             |
| 6.894603804                       | 3.003834252                                            | 7.97E-05    | 0.001373739 |             |             |
| ADAMTS7 15                        | 78759203                                               | 78811431    | -           | 7730        |             |
| protein_coding                    | ADAM metallopeptidase with thrombospondin type 1 motif |             |             |             |             |
| 7 [Source:HGNC                    | Symbol;Acc:HGNC:223] - 80                              |             |             |             |             |
| 12                                | 3                                                      | 6           | 0.360815674 | 0.171110129 |             |
| 0.479416469                       | 0.075059034                                            | 0.01691221  | 0.036234126 |             |             |
| ENSG00000104524                   | 425.7618967                                            | 532.996906  | 571.034275  |             |             |
| 978.4591883                       | 749.3650995                                            | 868.3757347 | 509.9310259 |             |             |
| 865.4000075                       | -0.761717908                                           | 8.00E-05    | 0.001376671 |             | PYCR3       |
| 8                                 | 143603913                                              | 143609773   | -           | 3244        |             |
| protein_coding                    | pyrroline-5-carboxylate reductase 3 [Source:HGNC       |             |             |             |             |
| Symbol;Acc:HGNC:25846]            | -                                                      | 368         | 575         | 584         | 974 820     |
| 885                               | 6.203855674                                            | 7.81485559  | 8.339393319 |             |             |
| 14.51708193                       | 11.01518016                                            | 12.73527892 |             |             |             |
| ENSG00000155959                   | 3037.024399                                            | 2407.292113 | 2453.296226 |             |             |
| 1704.769243                       | 1897.173106                                            | 1675.916107 | 2632.537579 |             |             |
| 1759.286152                       | 0.580985572                                            | 8.03E-05    | 0.001380316 |             | VBP1        |
| X                                 | 155197007                                              | 155239817   | +           | 2018        |             |
| protein_coding                    | VHL binding protein 1 [Source:HGNC                     |             |             |             |             |
| Symbol;Acc:HGNC:12662]            | -                                                      | 2625        | 2597        | 2509        | 1697 2076   |
| 1708                              | 71.13819779                                            | 56.73940088 | 57.59462504 |             |             |
| 40.65948719                       | 44.82959187                                            | 39.51051953 |             |             |             |
| ENSG00000179598                   | 189.7417148                                            | 307.7477788 | 116.3580115 |             |             |
| 503.2936892                       | 498.0536332                                            | 414.0729492 | 204.615835  |             |             |
| 471.8067572                       | -1.203985612                                           | 8.04E-05    | 0.001380316 |             | PLD6        |

|                        |                                                       |                        |                  |        |  |
|------------------------|-------------------------------------------------------|------------------------|------------------|--------|--|
| 17                     | 17200995                                              | 17206315               | -                | 2560   |  |
| protein_coding         | phospholipase D family member 6                       | [Source:HGNC           |                  |        |  |
| Symbol;Acc:HGNC:30447] | -                                                     | 164 332                | 119 501          | 545    |  |
| 422                    | 3.503471553                                           | 5.717841025            | 2.153324352      |        |  |
| 9.462349326            | 9.277161878                                           | 7.695175367            |                  |        |  |
| ENSG00000125304        | 3130.738294                                           | 2685.377455            | 3475.095571      |        |  |
| 2241.214013            | 2020.544189                                           | 2011.491815            | 3097.07044       |        |  |
| 2091.083339            | 0.566622854                                           | 8.07E-05               | 0.001384886      | TM9SF2 |  |
| 13                     | 99446311                                              | 99564006               | + 5524           |        |  |
| protein_coding         | transmembrane 9 superfamily member 2                  | [Source:HGNC           |                  |        |  |
| Symbol;Acc:HGNC:11865] | -                                                     | 2706 2897              | 3554 2231        | 2211   |  |
| 2050                   | 26.78976075                                           | 23.12218029            | 29.80342729      |        |  |
| 19.52752115            | 17.44189511                                           | 17.32392229            |                  |        |  |
| ENSG00000111846        | 892.017452                                            | 866.6993167            | 1095.134226      |        |  |
| 581.6507906            | 598.5782197                                           | 598.5414669            | 951.2836649      |        |  |
| 592.9234924            | 0.68214474                                            | 8.11E-05               | 0.001389753      | GCNT2  |  |
| 6                      | 10492223                                              | 10629368               | + 9072           |        |  |
| protein_coding         | glucosaminyl (N-acetyl) transferase 2 (I blood group) | [Source:HGNC           |                  |        |  |
| Symbol;Acc:HGNC:4204]  | -                                                     | 771 935                | 1120             |        |  |
| 579                    | 655 610                                               | 4.647785206            | 4.544043993      |        |  |
| 5.718964977            | 3.085863692                                           | 3.146276281            | 3.138866387      |        |  |
| ENSG00000183963        | 798.3035562                                           | 1366.325982            | 1016.910353      |        |  |
| 1836.36899             | 1625.756722                                           | 1905.520539            | 1060.513297      |        |  |
| 1789.215417            | -0.753491959                                          | 8.21E-05               | 0.001405764      | SMTN   |  |
| 22                     | 31064105                                              | 31104757               | + 10242          |        |  |
| protein_coding         | smoothelin [Source:HGNC                               | Symbol;Acc:HGNC:11126] | -                |        |  |
| 690                    | 1474 1040                                             | 1828 1779              | 1942 3.684334323 |        |  |
| 6.345219789            | 4.703823566                                           | 8.629639158            | 7.569196403      |        |  |
| 8.851369891            |                                                       |                        |                  |        |  |
| ENSG00000144959        | 1397.609704                                           | 1022.427108            | 1406.074122      |        |  |
| 742.3833061            | 657.0652519                                           | 890.9436917            | 1275.370312      |        |  |
| 763.4640832            | 0.740091282                                           | 8.26E-05               | 0.001412001      | NCEH1  |  |
| 3                      | 172630249                                             | 172711218              | - 4808           |        |  |
| protein_coding         | neutral cholesterol ester hydrolase 1                 | [Source:HGNC           |                  |        |  |
| Symbol;Acc:HGNC:29260] | -                                                     | 1208 1103              | 1438 739         | 719    |  |
| 908                    | 13.74033078                                           | 10.1145138             | 13.85469223      |        |  |
| 7.431580661            | 6.516629486                                           | 8.815915632            |                  |        |  |
| ENSG00000104823        | 1585.037496                                           | 1689.83193             | 1541.010304      |        |  |
| 2332.630632            | 2462.85237                                            | 2168.486298            | 1605.293243      |        |  |
| 2321.3231              | -0.53206243                                           | 8.29E-05               | 0.001416062      | ECH1   |  |
| 19                     | 38815422                                              | 38832005               | - 2467           |        |  |
| protein_coding         | enoyl-CoA hydratase 1                                 | [Source:HGNC           |                  |        |  |
| Symbol;Acc:HGNC:3149]  | -                                                     | 1370 1823              | 1576 2322        | 2695   |  |
| 2210                   | 30.3700936                                            | 32.58002979            | 29.5930358       |        |  |
| 45.50868457            | 47.60452299                                           | 41.81856828            |                  |        |  |
| ENSG00000134824        | 8993.063105                                           | 10560.75435            | 15766.99946      |        |  |
| 6282.632201            | 6431.745817                                           | 8431.584959            | 11773.60564      |        |  |
| 7048.654326            | 0.740204583                                           | 8.31E-05               | 0.001416748      | FADS2  |  |
| 11                     | 61792980                                              | 61867354               | + 11026          |        |  |
| protein_coding         | fatty acid desaturase 2                               | [Source:HGNC           |                  |        |  |



|                                                                      |                                                   |             |             |                |             |        |
|----------------------------------------------------------------------|---------------------------------------------------|-------------|-------------|----------------|-------------|--------|
| Symbol;Acc:HGNC:3575]                                                | -                                                 | 7773        | 11393       | 16125          | 6254        | 7038   |
| 8593                                                                 | 38.5536404                                        | 45.55688984 |             | 67.74608317    |             |        |
| 27.42465073                                                          | 27.81569221                                       | 36.38085149 |             |                |             |        |
| ENSG00000198492                                                      | 3780.950756                                       | 3823.673456 |             | 3532.785678    |             |        |
| 4968.643886                                                          | 5825.856719                                       | 4972.800253 |             | 3712.469963    |             |        |
| 5255.766952                                                          | -0.501608892                                      | 8.31E-05    |             | 0.001416748    |             | YTHDF2 |
| 1                                                                    | 28736621                                          | 28769775    |             | + 3859         |             |        |
| protein_coding                                                       | YTH N6-methyladenosine RNA binding protein 2      |             |             |                |             |        |
| [Source:HGNC Symbol;Acc:HGNC:31675]                                  | -                                                 |             |             | 3268           | 4125        | 3613   |
| 4946                                                                 | 6375                                              | 5068        | 46.31290061 | 47.12844737    |             |        |
| 43.37062082                                                          | 61.96986498                                       | 71.98864651 |             | 61.30668924    |             |        |
| ENSG00000182287                                                      | 1669.495698                                       | 1389.49976  |             | 1307.316482    |             |        |
| 885.0334136                                                          | 1039.97254                                        | 851.6950709 |             | 1455.437314    |             |        |
| 925.5670083                                                          | 0.652318867                                       | 8.35E-05    |             | 0.001421372    |             | AP1S2  |
| X                                                                    | 15825806                                          | 15854931    |             | - 5371         |             |        |
| protein_coding                                                       | adaptor related protein complex 1 subunit sigma 2 |             |             |                |             |        |
| [Source:HGNC Symbol;Acc:HGNC:560]                                    | -                                                 |             |             | 1443           | 1499        | 1337   |
| 881                                                                  | 1138                                              | 868         | 14.69284481 | 12.30496658    |             |        |
| 11.53131168                                                          | 7.930890844                                       | 9.233061055 |             | 7.544155103    |             |        |
| ENSG00000183688                                                      | 897.8022604                                       | 756.3921309 |             | 984.6430051    |             |        |
| 545.4859746                                                          | 581.214882                                        | 440.5657682 |             | 879.6124655    |             |        |
| 522.4222083                                                          | 0.751195634                                       | 8.38E-05    |             | 0.001424379    |             | RFLNB  |
| 17                                                                   | 439978                                            | 445939      | - 3621      | protein_coding |             |        |
| refilin B [Source:HGNC Symbol;Acc:HGNC:28705]                        | -                                                 |             |             | 776            |             | 816    |
| 1007                                                                 | 543                                               | 636         | 449         | 11.72000803    | 9.935634159 |        |
| 12.88259642                                                          | 7.250576202                                       | 7.65397763  |             | 5.788470869    |             |        |
| ENSG00000140365                                                      | 860.7794867                                       | 1108.633564 |             | 1245.715182    |             |        |
| 610.783559                                                           | 675.3424494                                       | 667.2265532 |             | 1071.709411    |             |        |
| 651.1175205                                                          | 0.719497025                                       | 8.45E-05    |             | 0.001435312    |             | COMMD4 |
| 15                                                                   | 75335891                                          | 75343224    |             | + 6779         |             |        |
| protein_coding                                                       | COMM domain containing 4 [Source:HGNC             |             |             |                |             |        |
| Symbol;Acc:HGNC:26027]                                               | -                                                 | 744         | 1196        | 1274           | 608         | 739    |
| 680                                                                  | 6.002083243                                       | 7.778565332 |             | 8.70575117     |             |        |
| 4.336498114                                                          | 4.750478996                                       | 4.682624301 |             |                |             |        |
| ENSG00000112977                                                      | 3351.717975                                       | 2958.828042 |             | 3860.348147    |             |        |
| 2090.52728                                                           | 2404.365337                                       | 2357.860893 |             | 3390.298054    |             |        |
| 2284.25117                                                           | 0.569572316                                       | 8.52E-05    |             | 0.001445686    |             | DAP    |
| 5                                                                    | 10679230                                          | 10761272    |             | - 3361         |             |        |
| protein_coding                                                       | death associated protein [Source:HGNC             |             |             |                |             |        |
| Symbol;Acc:HGNC:2672]                                                | -                                                 | 2897        | 3192        | 3948           | 2081        | 2631   |
| 2403                                                                 | 47.1383846                                        | 41.87244571 |             | 54.41405451    |             |        |
| 29.93675921                                                          | 34.11229458                                       | 33.37577002 |             |                |             |        |
| ENSG00000002822                                                      | 1986.503197                                       | 2320.158706 |             | 2155.067709    |             |        |
| 3286.979942                                                          | 2938.059506                                       | 3055.505128 |             | 2153.909871    |             |        |
| 3093.514859                                                          | -0.521919046                                      | 8.59E-05    |             | 0.001456133    |             | MAD1L1 |
| 7                                                                    | 1815793                                           | 2233243     | - 7230      | protein_coding |             |        |
| mitotic arrest deficient 1 like 1 [Source:HGNC Symbol;Acc:HGNC:6762] | -                                                 |             |             |                |             |        |
| -                                                                    | 1717                                              | 2503        | 2204        | 3272           | 3215        | 3114   |
| 12.98753439                                                          | 15.26358362                                       | 14.12133477 |             | 21.88145587    |             |        |
| 19.3776576                                                           | 20.10603095                                       |             |             |                |             |        |

|                                       |                       |                                     |               |             |              |
|---------------------------------------|-----------------------|-------------------------------------|---------------|-------------|--------------|
| ENSG0000019505                        | 19.66834849           | 15.75816939                         | 17.60037149   | 0           |              |
| 0                                     | 0                     | 17.67562979                         | 0             | 6.635961258 |              |
| 8.61E-05                              | 1                     | SYT13                               | 11            | 45240301    | 45286319     |
| -                                     | 5424                  | protein_coding                      | synaptotagmin | 13          | [Source:HGNC |
| Symbol;Acc:HGNC:14962]                | -                     | 17                                  | 17            | 18          | 0            |
| 0                                     | 0.171405184           | 0.13818573                          | 0.153728815   | 0           |              |
| 0                                     | 0                     |                                     |               |             |              |
| ENSG00000182473                       | 2246.819574           | 2011.483976                         | 1945.818848   |             |              |
| 2954.464551                           | 2901.505111           | 2977.007886                         | 2068.040799   |             |              |
| 2944.325849                           | -0.50997786           | 8.71E-05                            | 0.00147503    |             | EXOC7        |
| 17                                    | 76081017              | 76121576                            | -             | 10086       |              |
| protein_coding                        | exocyst complex       | component 7                         | [Source:HGNC  |             |              |
| Symbol;Acc:HGNC:23214]                | -                     | 1942                                | 2170          | 1990        | 2941         |
| 3034                                  | 10.52991764           | 9.485816694                         | 9.139797389   |             | 3175         |
| 14.09864182                           | 13.71776515           | 14.04244231                         |               |             |              |
| ENSG00000134986                       | 1217.123683           | 600.6643393                         | 793.9723139   |             |              |
| 471.1471861                           | 448.7051998           | 447.4342769                         | 870.5867787   |             |              |
| 455.7622209                           | 0.932558595           | 8.75E-05                            | 0.001478917   |             | NREP         |
| 5                                     | 111662621             | 111997464                           | -             | 9337        |              |
| protein_coding                        | neuronal regeneration | related protein                     | [Source:HGNC  |             |              |
| Symbol;Acc:HGNC:16834]                | -                     | 1052                                | 648           | 812         | 469          |
| 456                                   | 6.161736096           | 3.059860343                         | 4.028571966   |             | 491          |
| 2.42865989                            | 2.291567905           | 2.279835541                         |               |             |              |
| ENSG00000114520                       | 806.402288            | 845.3794405                         | 957.2646494   |             |              |
| 322.4696093                           | 497.1397733           | 597.5602514                         | 869.6821259   |             |              |
| 472.389878                            | 0.880385451           | 8.76E-05                            | 0.00147911    |             | SNX4         |
| 3                                     | 125446644             | 125520197                           | -             | 2709        |              |
| protein_coding                        | sorting nexin 4       | [Source:HGNC Symbol;Acc:HGNC:11175] |               |             |              |
| -                                     | 697                   | 912                                 | 979           | 321         | 544          |
| 14.07079014                           | 14.84293519           | 16.74079748                         | 5.729243014   |             |              |
| 8.750814795                           | 10.4943205            |                                     |               |             |              |
| ENSG00000255031                       | 6.941770054           | 48.20145932                         | 57.69010655   |             | 0            |
| 0                                     | 3.924862078           | 37.61111198                         | 1.308287359   |             |              |
| 4.859798869                           | 8.78E-05              | 0.001482242                         | AP002807.1    |             | 11           |
| 68050740                              | 68053762              | +                                   | 1209          | antisense   |              |
| "novel transcript, antisense to CHKA" |                       |                                     | -             | 6           | 52           |
| 59                                    | 0                     | 0                                   | 4             | 0.271406136 | 1.896317272  |
| 2.260623129                           | 0                     | 0                                   | 0.154447089   |             |              |
| ENSG00000105559                       | 314.6935758           | 554.3167822                         | 384.2747776   |             |              |
| 568.5912737                           | 953.1558521           | 985.1403815                         | 417.7617119   |             |              |
| 835.6291691                           | -0.998922333          | 8.84E-05                            | 0.001489464   |             |              |
| PLEKHA4                               | 19                    | 48837097                            | 48868632      | -           | 3851         |
| protein_coding                        | pleckstrin homology   | domain containing A4                | [Source:HGNC  |             |              |
| Symbol;Acc:HGNC:14339]                | -                     | 272                                 | 598           | 393         | 566          |
| 1004                                  | 3.86269216            | 6.846389819                         | 4.727390603   |             | 1043         |
| 7.106309676                           | 11.8023744            | 12.17043861                         |               |             |              |
| ENSG00000118785                       | 48.59239038           | 22.24682738                         | 9.777984162   |             |              |
| 177.8103453                           | 79.50580934           | 107.9337071                         | 26.87240064   |             |              |
| 121.7499539                           | -2.190508135          | 8.89E-05                            | 0.001496772   |             | SPP1         |
| 4                                     | 87975650              | 87983426                            | +             | 2321        |              |

|                        |                                                         |             |             |             |            |        |
|------------------------|---------------------------------------------------------|-------------|-------------|-------------|------------|--------|
| protein_coding         | secreted phosphoprotein 1 [Source:HGNC                  |             |             |             |            |        |
| Symbol;Acc:HGNC:11255] | -                                                       | 42          | 24          | 10          | 177        | 87     |
| 110                    | 0.989620909                                             | 0.45590049  | 0.199584732 |             |            |        |
| 3.687222476            | 1.633438208                                             | 2.212399647 |             |             |            |        |
| ENSG00000171223        | 1217.123683                                             | 2021.680438 | 1324.916854 |             |            |        |
| 2210.072088            | 3093.415685                                             | 2502.099575 | 1521.240325 |             |            |        |
| 2601.862449            | -0.773816954                                            | 8.91E-05    | 0.001498872 |             |            | JUNB   |
| 19                     | 12791496                                                | 12793315    | +           | 1820        |            |        |
| protein_coding         | "JunB proto-oncogene, AP-1 transcription factor         |             |             |             |            |        |
| subunit [Source:HGNC   | Symbol;Acc:HGNC:6205]"                                  |             |             |             |            |        |
| 1355                   | 2200                                                    | 3385        | 2550        | 31.6110604  | 52.8345771 | 2181   |
| 34.48818687            | 58.44569257                                             | 81.04866818 | 65.40558407 |             |            |        |
| ENSG00000177084        | 3870.036805                                             | 4240.801469 | 4925.170622 |             |            |        |
| 3134.284053            | 2341.309006                                             | 3081.016731 | 4345.336299 |             |            |        |
| 2852.203263            | 0.607647642                                             | 8.98E-05    | 0.001508647 |             |            | POLE   |
| 12                     | 132623753                                               | 132687365   | -           | 16609       |            |        |
| protein_coding         | "DNA polymerase epsilon, catalytic subunit              |             |             |             |            |        |
| [Source:HGNC           | Symbol;Acc:HGNC:9177]"                                  |             |             |             |            |        |
| 3120                   | 2562                                                    | 3140        | 11.01405776 | 12.14455403 |            | 5037   |
| 14.04853124            | 9.082644697                                             | 6.721933908 | 8.825355303 |             |            |        |
| ENSG00000213380        | 1047.050317                                             | 1064.13991  | 1166.51351  |             |            |        |
| 1650.522019            | 1621.187423                                             | 1553.264167 | 1092.567912 |             |            |        |
| 1608.324536            | -0.557652947                                            | 8.99E-05    | 0.001508647 |             |            | COG8   |
| 16                     | 69320140                                                | 69339667    | -           | 7450        |            |        |
| protein_coding         | component of oligomeric golgi complex 8 [Source:HGNC    |             |             |             |            |        |
| Symbol;Acc:HGNC:18623] | -                                                       | 905         | 1148        | 1193        | 1643       | 1774   |
| 1583                   | 6.643348251                                             | 6.793906619 | 7.417996545 |             |            |        |
| 10.66307606            | 10.37662066                                             | 9.919063669 |             |             |            |        |
| ENSG00000105287        | 638.642845                                              | 899.1426066 | 836.0176458 |             |            |        |
| 1160.287846            | 1347.029459                                             | 1325.622167 | 791.2676991 |             |            |        |
| 1277.646491            | -0.690241767                                            | 9.01E-05    | 0.001510951 |             |            | PRKD2  |
| 19                     | 46674275                                                | 46717127    | -           | 5446        |            |        |
| protein_coding         | protein kinase D2 [Source:HGNC                          |             |             |             |            |        |
| Symbol;Acc:HGNC:17293] | -                                                       | 552         | 970         | 855         | 1155       | 1474   |
| 1351                   | 7.852863621                                             | 7.272620629 | 10.25428925 |             |            |        |
| 5.543143906            | 11.58040499                                             |             |             |             |            |        |
| 11.79447039            | 3342.462281                                             | 2355.382849 | 2359.427578 |             |            |        |
| ENSG00000081320        | 1963.884877                                             | 1573.869693 | 2685.757569 |             |            |        |
| 1393.349994            | 0.707792317                                             | 9.05E-05    | 0.001515412 |             |            | STK17B |
| 1643.701521            | 196133566                                               | 196176503   | -           | 6580        |            |        |
| 2                      | protein_coding serine/threonine kinase 17b [Source:HGNC |             |             |             |            |        |
| Symbol;Acc:HGNC:11396] | -                                                       | 2889        | 2541        | 2413        | 1387       | 2149   |
| 1604                   | 24.01133799                                             | 17.02600393 | 16.98767267 |             |            |        |
| 10.19182092            | 14.23210436                                             | 11.37953474 |             |             |            |        |
| ENSG00000138376        | 767.065591                                              | 733.2183524 | 746.0601915 |             |            |        |
| 418.9091186            | 481.6041554                                             | 489.6265442 | 748.7813783 |             |            |        |
| 463.3799394            | 0.69197089                                              | 9.22E-05    | 0.001541478 |             |            | BARD1  |
| 2                      | 214725646                                               | 214809711   | -           | 6067        |            |        |
| protein_coding         | BRCA1 associated RING domain 1 [Source:HGNC             |             |             |             |            |        |
| Symbol;Acc:HGNC:952]   | -                                                       | 663         | 791         | 763         | 417        | 527    |

|                                                  |                                                     |             |             |             |
|--------------------------------------------------|-----------------------------------------------------|-------------|-------------|-------------|
| 499                                              | 5.97632554                                          | 5.748260569 | 5.825765493 |             |
| 3.323252013                                      | 3.785255664                                         | 3.839481563 |             |             |
| ENSG0000004399                                   | 3062.477556                                         | 3057.084863 | 6165.019014 |             |
| 1687.691413                                      | 1188.931701                                         | 1346.227693 | 4094.860477 |             |
| 1407.616935                                      | 1.540638265                                         | 9.30E-05    | 0.001554031 | PLXND1      |
| 3                                                | 129555175                                           | 129606818   | - 9738      |             |
| protein_coding                                   | plexin D1 [Source:HGNC Symbol;Acc:HGNC:9107]        |             |             | -           |
| 2647                                             | 3298                                                | 6305        | 1680        | 1301        |
| 14.93189197                                      | 29.99285283                                         | 8.341434195 | 5.821918534 |             |
| 6.577038392                                      |                                                     |             |             |             |
| ENSG00000147251                                  | 835.3263299                                         | 673.8934794 | 857.529211  |             |
| 511.330315                                       | 491.656614                                          | 386.5989147 | 788.9163401 |             |
| 463.1952812                                      | 0.767788547                                         | 9.31E-05    | 0.001554031 | DOCK11      |
| X                                                | 118495898                                           | 118686163   | + 6721      |             |
| protein_coding                                   | dedicator of cytokinesis 11 [Source:HGNC            |             |             |             |
| Symbol;Acc:HGNC:23483]                           | -                                                   | 722         | 727         | 877         |
| 394                                              | 5.874866672                                         | 4.769078526 | 6.044608169 | 538         |
| 3.661719758                                      | 3.488244981                                         | 2.736581346 |             |             |
| ENSG00000108424                                  | 15303.13208                                         | 14644.90107 | 16366.38989 |             |
| 12012.74638                                      | 10399.7254                                          | 11186.83814 | 15438.14102 |             |
| 11199.76997                                      | 0.463054183                                         | 9.34E-05    | 0.00155746  | KPNB1       |
| 17                                               | 47649476                                            | 47685505    | + 7678      |             |
| protein_coding                                   | karyopherin subunit beta 1 [Source:HGNC             |             |             |             |
| Symbol;Acc:HGNC:6400]                            | -                                                   | 13227       | 15799       | 16738       |
| 11401                                            | 94.2123764                                          | 90.72259189 | 100.9852422 | 11380       |
| 75.30289239                                      | 64.58813614                                         | 69.31717801 |             |             |
| ENSG00000132561                                  | 185.1138681                                         | 141.8235245 | 215.1156516 |             |
| 96.43950931                                      | 35.64053522                                         | 37.28618974 | 180.6843481 |             |
| 56.45541142                                      | 1.680505707                                         | 9.41E-05    | 0.001566734 | MATN2       |
| 8                                                | 97868840                                            | 98036716    | + 6933      |             |
| protein_coding                                   | matrilin 2 [Source:HGNC Symbol;Acc:HGNC:6908]       |             |             | -           |
| 160                                              | 153                                                 | 220         | 96          | 39          |
| 0.972980617                                      | 1.46995465                                          | 0.66950103  | 0.245133127 |             |
| 0.255863556                                      |                                                     |             |             |             |
| ENSG00000212719                                  | 939.4528807                                         | 946.4171148 | 910.3303254 |             |
| 1540.018414                                      | 1356.168058                                         | 1305.997856 | 932.0667736 |             |
| 1400.72811                                       | -0.587596135                                        | 9.44E-05    | 0.001568421 |             |
| C17orf51                                         | 17                                                  | 21428381    | 21574517    | - 14794     |
| protein_coding                                   | chromosome 17 open reading frame 51                 |             |             |             |
| [Source:HGNC Symbol;Acc:HGNC:27904]              | -                                                   |             | 812         | 1021        |
| 1533                                             | 1484                                                | 1331        | 3.001685087 | 3.042804751 |
| 2.915187697                                      | 5.010231083                                         | 4.371262471 | 4.199895426 |             |
| ENSG00000126243                                  | 696.4909288                                         | 842.598587  | 810.594887  |             |
| 1156.269534                                      | 1330.579982                                         | 1161.759175 | 783.2281343 |             |
| 1216.202897                                      | -0.634285903                                        | 9.44E-05    | 0.001568421 | LRFN3       |
| 19                                               | 35935358                                            | 35945767    | + 4044      |             |
| protein_coding                                   | leucine rich repeat and fibronectin type III domain |             |             |             |
| containing 3 [Source:HGNC Symbol;Acc:HGNC:28370] | -                                                   |             |             | 602         |
| 909                                              | 829                                                 | 1151        | 1456        | 1184        |
| 9.910297554                                      | 9.496112246                                         | 13.76148792 | 15.68948997 |             |

|                                     |                                                |             |             |             |       |       |
|-------------------------------------|------------------------------------------------|-------------|-------------|-------------|-------|-------|
| 13.6674216                          |                                                |             |             |             |       |       |
| ENSG00000108107                     | 15872.35723                                    | 23625.20373 | 22240.02498 |             |       |       |
| 29458.25178                         | 31215.62569                                    | 31841.42482 | 20579.19531 |             |       |       |
| 30838.4341                          | -0.583474547                                   | 9.46E-05    | 0.00157049  |             |       | RPL28 |
| 19                                  | 55385345                                       | 55403250    | + 6933      |             |       |       |
| protein_coding                      | ribosomal protein L28 [Source:HGNC             |             |             |             |       |       |
| Symbol;Acc:HGNC:10330]              | -                                              | 13719       | 25487       | 22745       | 29324 | 34158 |
| 32451                               | 108.2171192                                    | 162.0807646 | 151.973266  |             |       |       |
| 204.5046687                         | 214.6989061                                    | 218.500744  |             |             |       |       |
| ENSG00000183255                     | 9023.144109                                    | 9887.787819 | 11013.92136 |             |       |       |
| 5812.489593                         | 7576.812244                                    | 7097.131852 | 9974.951096 |             |       |       |
| 6828.81123                          | 0.546677996                                    | 9.47E-05    | 0.00157049  |             |       |       |
| PTTG1IP 21                          | 44849585                                       | 44873903    | - 3537      |             |       |       |
| protein_coding                      | PTTG1 interacting protein [Source:HGNC         |             |             |             |       |       |
| Symbol;Acc:HGNC:13524]              | -                                              | 7799        | 10667       | 11264       | 5786  | 8291  |
| 7233                                | 120.5864676                                    | 132.9661804 | 147.5231027 |             |       |       |
| 79.09419058                         | 102.1481377                                    | 95.46176089 |             |             |       |       |
| ENSG00000067955                     | 4041.267133                                    | 3889.486987 | 4251.467513 |             |       |       |
| 3006.702619                         | 2970.044602                                    | 2753.290748 | 4060.740545 |             |       |       |
| 2910.012656                         | 0.480694008                                    | 9.60E-05    | 0.001589698 |             |       | CBFB  |
| 16                                  | 67029116                                       | 67101058    | + 4129      |             |       |       |
| protein_coding                      | core-binding factor subunit beta [Source:HGNC  |             |             |             |       |       |
| Symbol;Acc:HGNC:1539]               | CBF                                            | 3493        | 4196        | 4348        | 2993  | 3250  |
| 2806                                | 46.2645578                                     | 44.80480119 | 48.78059669 |             |       |       |
| 35.04798469                         | 34.30023345                                    | 31.72406417 |             |             |       |       |
| ENSG00000145147                     | 2222.523379                                    | 1279.192574 | 2616.588562 |             |       |       |
| 1153.255799                         | 772.2115964                                    | 1289.317193 | 2039.434838 |             |       |       |
| 1071.594863                         | 0.928431491                                    | 9.65E-05    | 0.001596482 |             |       | SLIT2 |
| 4                                   | 20253260                                       | 20620561    | + 9712      |             |       |       |
| protein_coding                      | slit guidance ligand 2 [Source:HGNC            |             |             |             |       |       |
| Symbol;Acc:HGNC:11086]              | -                                              | 1921        | 1380        | 2676        | 1148  | 845   |
| 1314                                | 10.81716374                                    | 6.264759028 | 12.76379708 |             |       |       |
| 5.715239452                         | 3.791461348                                    | 6.315863383 |             |             |       |       |
| ENSG00000112144                     | 1755.110862                                    | 1293.096841 | 1473.542213 |             |       |       |
| 992.5232834                         | 1024.436923                                    | 838.9392691 | 1507.249972 |             |       |       |
| 951.9664917                         | 0.662269103                                    | 9.68E-05    | 0.001599173 |             |       | ICK   |
| 6                                   | 53001279                                       | 53061802    | - 6259      |             |       |       |
| protein_coding                      | intestinal cell kinase [Source:HGNC            |             |             |             |       |       |
| Symbol;Acc:HGNC:21219]              | -                                              | 1517        | 1395        | 1507        | 988   | 1121  |
| 855                                 | 13.25486601                                    | 9.82659855  | 11.15348934 |             |       |       |
| 7.63226093                          | 7.804754715                                    | 6.376864648 |             |             |       |       |
| ENSG00000111328                     | 469.7264403                                    | 454.206059  | 431.2091015 |             |       |       |
| 257.1720248                         | 260.4500651                                    | 256.0972506 | 451.713867  |             |       |       |
| 257.9064468                         | 0.808278361                                    | 9.74E-05    | 0.001608601 |             |       |       |
| CDK2AP1 12                          | 123260971                                      | 123272334   | - 3117      |             |       |       |
| protein_coding                      | cyclin dependent kinase 2 associated protein 1 |             |             |             |       |       |
| [Source:HGNC Symbol;Acc:HGNC:14002] | -                                              |             | 406         | 490         |       | 441   |
| 256                                 | 285                                            | 261         | 7.123344431 | 6.930957499 |       |       |
| 6.553966889                         | 3.971041077                                    | 3.984434166 | 3.908856624 |             |       |       |
| ENSG00000272899                     | 61.31896881                                    | 113.0880392 | 97.77984162 |             |       |       |

|                                                                      |              |             |             |                |
|----------------------------------------------------------------------|--------------|-------------|-------------|----------------|
| 342.5611737                                                          | 244.0005873  | 151.10719   | 90.72894987 |                |
| 245.8896503                                                          | -1.434516647 | 9.76E-05    | 0.001609346 |                |
| ATP6V1FNB                                                            | 7            | 128866308   | 128872044   | + 3902         |
| protein_coding ATP6V1F neighbor [Source:HGNC                         |              |             |             |                |
| Symbol;Acc:HGNC:52392]                                               | -            | 53          | 122         | 100 341 267    |
| 154                                                                  | 0.742819536  | 1.378499216 | 1.187176225 |                |
| 4.225404888                                                          | 2.981828038  | 1.842381193 |             |                |
| ENSG00000204525                                                      | 1715.774165  | 2050.415924 | 2174.623678 |                |
| 1059.830024                                                          | 1421.052109  | 1324.640951 | 1980.271255 |                |
| 1268.507695                                                          | 0.642656085  | 9.77E-05    | 0.001609346 | HLA-C          |
| 6                                                                    | 31268749     | 31272130    | - 2507      |                |
| protein_coding "major histocompatibility complex, class I, C         |              |             |             |                |
| [Source:HGNC Symbol;Acc:HGNC:4933]"                                  | -            | 1483        | 2212        | 2224           |
| 1055                                                                 | 1555         | 1350        | 32.35053966 | 38.9013566     |
| 41.09442468                                                          | 20.34695114  | 27.0292912  | 25.13769603 |                |
| ENSG00000112655                                                      | 2558.042265  | 2128.279819 | 3487.80695  |                |
| 1601.297686                                                          | 1421.052109  | 1907.48297  | 2724.709678 |                |
| 1643.277588                                                          | 0.729622868  | 9.79E-05    | 0.001610621 | PTK7           |
| 6                                                                    | 43076268     | 43161719    | + 9024      |                |
| protein_coding protein tyrosine kinase 7 (inactive) [Source:HGNC     |              |             |             |                |
| Symbol;Acc:HGNC:9618]                                                | -            | 2211        | 2296        | 3567 1594 1555 |
| 1944                                                                 | 13.39936966  | 11.21777578 | 18.31076456 |                |
| 8.540640605                                                          | 7.509134866  | 10.05641552 |             |                |
| ENSG00000160447                                                      | 423.4479733  | 460.694717  | 743.1267963 |                |
| 247.1262426                                                          | 216.5847909  | 329.6884145 | 542.4231622 |                |
| 264.4664827                                                          | 1.037262952  | 9.82E-05    | 0.001614969 | PKN3           |
| 9                                                                    | 128702523    | 128720918   | + 3375      |                |
| protein_coding protein kinase N3 [Source:HGNC Symbol;Acc:HGNC:17999] |              |             |             |                |
| -                                                                    | 366          | 497         | 760         | 246 237 336    |
| 5.930646262                                                          | 6.492568936  | 10.43139212 | 3.524216226 |                |
| 3.060082721                                                          | 4.647415863  |             |             |                |
| ENSG00000122884                                                      | 1924.027267  | 1142.930757 | 1520.476537 |                |
| 784.5755914                                                          | 950.4142725  | 964.5348556 | 1529.144854 |                |
| 899.8415732                                                          | 0.764178412  | 9.91E-05    | 0.001625885 | P4HA1          |
| 10                                                                   | 73007217     | 73096974    | - 3093      |                |
| protein_coding prolyl 4-hydroxylase subunit alpha 1 [Source:HGNC     |              |             |             |                |
| Symbol;Acc:HGNC:8546]                                                | -            | 1663        | 1233        | 1555 781 1040  |
| 983                                                                  | 29.40404251  | 17.57588145 | 23.28911198 |                |
| 12.20878176                                                          | 14.65250968  | 14.83609596 |             |                |
| ENSG00000204231                                                      | 1339.76162   | 1599.917669 | 1503.853964 |                |
| 2062.39909                                                           | 2255.406177  | 2173.392376 | 1481.177751 |                |
| 2163.732548                                                          | -0.546360891 | 9.91E-05    | 0.001625885 | RXRB           |
| 6                                                                    | 33193588     | 33200688    | - 3920      |                |
| protein_coding retinoid X receptor beta [Source:HGNC                 |              |             |             |                |
| Symbol;Acc:HGNC:10478]                                               | RXR-like     | 1158        | 1726        | 1538 2053      |
| 2468                                                                 | 2215         | 16.15538102 | 19.41282244 | 18.17492905    |
| 25.32235534                                                          | 27.43580365  | 26.37750411 |             |                |
| ENSG00000143369                                                      | 822.5997514  | 672.9665283 | 1236.914996 |                |
| 420.918275                                                           | 517.2446906  | 532.8000271 | 910.827092  |                |
| 490.3209976                                                          | 0.893327466  | 1.00E-04    | 0.0016378   | ECM1           |

|                                     |                                                     |             |             |       |        |
|-------------------------------------|-----------------------------------------------------|-------------|-------------|-------|--------|
| 1                                   | 150508062                                           | 150513789   | +           | 3360  |        |
| protein_coding                      | extracellular matrix protein 1 [Source:HGNC         |             |             |       |        |
| Symbol;Acc:HGNC:3153]               | -                                                   | 711 726     | 1265        | 419   | 566    |
| 543                                 | 11.57244262                                         | 9.526454582 | 17.44029007 |       |        |
| 6.029425899                         | 7.340670858                                         | 7.544085261 |             |       |        |
| ENSG00000100567                     | 2381.027129                                         | 1658.315591 | 1693.546857 |       |        |
| 1012.614848                         | 1336.977001                                         | 1166.665253 | 1910.963192 |       |        |
| 1172.0857                           | 0.704459667                                         | 0.000100292 | 0.001641496 |       | PSMA3  |
| 14                                  | 58244831                                            | 58272012    | +           | 3119  |        |
| protein_coding                      | proteasome subunit alpha 3 [Source:HGNC             |             |             |       |        |
| Symbol;Acc:HGNC:9532]               | -                                                   | 2058 1789   | 1732        | 1008  | 1463   |
| 1189                                | 36.08483372                                         | 25.28884088 | 25.72379078 |       |        |
| 15.62594797                         | 20.44031334                                         | 17.7955951  |             |       |        |
| ENSG00000114270                     | 4803.704878                                         | 4885.959463 | 9060.280124 |       |        |
| 2326.603162                         | 1594.685486                                         | 2690.492954 | 6249.981488 |       |        |
| 2203.927201                         | 1.503836181                                         | 0.000100528 | 0.001643608 |       | COL7A1 |
| 3                                   | 48564073                                            | 48595267    | -           | 11071 |        |
| protein_coding                      | collagen type VII alpha 1 chain [Source:HGNC        |             |             |       |        |
| Symbol;Acc:HGNC:2214]               | -                                                   | 4152 5271   | 9266        | 2316  | 1745   |
| 2742                                | 20.50997858                                         | 20.99133809 | 38.77108019 |       |        |
| 10.11469801                         | 6.868583437                                         | 11.56183149 |             |       |        |
| ENSG00000060656                     | 1025.068045                                         | 1106.779662 | 1603.589403 |       |        |
| 809.690047                          | 732.0017618                                         | 652.5083204 | 1245.145703 |       |        |
| 731.4000431                         | 0.767997393                                         | 0.000100657 | 0.001643959 |       | PTPRU  |
| 1                                   | 29236516                                            | 29326813    | +           | 6682  |        |
| protein_coding                      | "protein tyrosine phosphatase, receptor type U      |             |             |       |        |
| [Source:HGNC Symbol;Acc:HGNC:9683]" | -                                                   |             | 886         | 1194  | 1640   |
| 806                                 | 801 665                                             | 7.251401688 | 7.878287285 |       |        |
| 11.36945986                         | 5.832164795                                         | 5.223777164 | 4.64580749  |       |        |
| ENSG00000163781                     | 4986.504822                                         | 4297.345489 | 4261.245498 |       |        |
| 3340.222588                         | 3062.344449                                         | 3179.138283 | 4515.031936 |       |        |
| 3193.901774                         | 0.499274658                                         | 0.000101092 | 0.001649301 |       | TOPBP1 |
| 3                                   | 133598175                                           | 133662380   | -           | 7304  |        |
| protein_coding                      | DNA topoisomerase II binding protein 1 [Source:HGNC |             |             |       |        |
| Symbol;Acc:HGNC:17008]              | -                                                   | 4310 4636   | 4358        | 3325  | 3351   |
| 3240                                | 32.27091046                                         | 27.98444001 | 27.63941948 |       |        |
| 22.01061116                         | 19.99273737                                         | 20.70762452 |             |       |        |
| ENSG00000185730                     | 397.9948164                                         | 617.3494598 | 488.8992081 |       |        |
| 972.4317189                         | 748.4512396                                         | 907.6243555 | 501.4144948 |       |        |
| 876.1691047                         | -0.803494597                                        | 0.000102297 | 0.001667187 |       | ZNF696 |
| 8                                   | 143289676                                           | 143298061   | +           | 4012  |        |
| protein_coding                      | zinc finger protein 696 [Source:HGNC                |             |             |       |        |
| Symbol;Acc:HGNC:25872]              | zf-C2H2                                             | 344 666     | 500         | 968   | 819    |
| 925                                 | 4.689129544                                         | 7.318924427 | 5.773132641 |       |        |
| 11.66583016                         | 8.895729637                                         | 10.76283901 |             |       |        |
| ENSG00000156504                     | 2300.039811                                         | 2048.562021 | 2772.05851  |       |        |
| 1713.810447                         | 1552.647932                                         | 1309.922718 | 2373.553447 |       |        |
| 1525.460366                         | 0.637815594                                         | 0.000103071 | 0.001675459 |       |        |
| FAM122B X                           | 134769566                                           | 134797232   | -           | 4404  |        |
| protein_coding                      | family with sequence similarity 122B [Source:HGNC   |             |             |       |        |

|                                  |                                        |                               |      |             |             |                     |
|----------------------------------|----------------------------------------|-------------------------------|------|-------------|-------------|---------------------|
| Symbol;Acc:HGNC:30490]           | -                                      | 1988                          | 2210 | 2835        | 1706        | 1699                |
| 1335                             | 24.68674224                            | 22.12477798                   |      | 29.82003911 |             |                     |
| 18.72979108                      | 16.81143038                            | 14.15076736                   |      |             |             |                     |
| ENSG00000127666                  | 435.0175901                            | 793.4701766                   |      | 602.3238244 |             |                     |
| 1212.525914                      | 997.9349861                            | 1052.844252                   |      | 610.2705303 |             |                     |
| 1087.768384                      | -0.832175146                           | 0.000103099                   |      | 0.001675459 |             | TICAM1              |
| 19                               | 4815932                                | 4831704                       | -    | 2676        |             | protein_coding toll |
| like receptor adaptor molecule 1 | [Source:HGNC                           | Symbol;Acc:HGNC:18348]        |      |             |             |                     |
| -                                | 376                                    | 856                           | 616  | 1207        | 1092        | 1073                |
| 7.684160874                      | 14.10332823                            | 10.66343335                   |      | 21.80832836 |             |                     |
| 17.78259457                      | 18.71800887                            |                               |      |             |             |                     |
| ENSG00000137936                  | 1427.690708                            | 1439.555122                   |      | 1170.424704 |             |                     |
| 1900.661996                      | 1983.075934                            | 2136.106186                   |      | 1345.890178 |             |                     |
| 2006.614705                      | -0.5763722                             | 0.000103134                   |      | 0.001675459 |             | BCAR3               |
| 1                                | 93561786                               | 93847150                      |      | -           | 6866        |                     |
| protein_coding                   | "BCAR3, NSP family adaptor protein     | [Source:HGNC                  |      |             |             |                     |
| Symbol;Acc:HGNC:973]"            | -                                      | 1234                          | 1553 | 1197        | 1892        | 2170                |
| 2177                             | 9.828926181                            | 9.972444193                   |      | 8.075934857 |             |                     |
| 13.32350685                      | 13.77255554                            | 14.80132742                   |      |             |             |                     |
| ENSG00000122376                  | 1325.87808                             | 1188.351363                   |      | 1265.271151 |             |                     |
| 823.7541421                      | 883.7025015                            | 806.559157                    |      | 1259.833531 |             |                     |
| 838.0052668                      | 0.587775272                            | 0.000103334                   |      | 0.001676936 |             | SHLD2               |
| 10                               | 87094161                               | 87191468                      |      | +           | 4242        |                     |
| protein_coding                   | shieldin complex subunit 2             | [Source:HGNC                  |      |             |             |                     |
| Symbol;Acc:HGNC:28773]           | -                                      | 1146                          | 1282 | 1294        | 820         | 967                 |
| 822                              | 14.77435963                            | 13.32451221                   |      | 14.13077782 |             |                     |
| 9.346400883                      | 9.933777028                            | 9.045804328                   |      |             |             |                     |
| ENSG00000136720                  | 521.7897157                            | 588.6139744                   |      | 704.0148596 |             |                     |
| 964.3950931                      | 1005.245865                            | 947.8541918                   |      | 604.8061833 |             |                     |
| 972.4983834                      | -0.684473574                           | 0.000103685                   |      | 0.001680845 |             | HS6ST1              |
| 2                                | 128236716                              | 128318577                     |      | -           | 4683        |                     |
| protein_coding                   | heparan sulfate 6-O-sulfotransferase 1 | [Source:HGNC                  |      |             |             |                     |
| Symbol;Acc:HGNC:5201]            | -                                      | 451                           | 635  | 720         | 960         | 1100                |
| 966                              | 5.266803274                            | 5.978380125                   |      | 7.122144725 |             |                     |
| 9.911703266                      | 10.23592571                            | 9.629395056                   |      |             |             |                     |
| ENSG00000277957                  | 5.784808379                            | 28.73548537                   |      | 20.53376674 |             | 0                   |
| 0                                | 0                                      | 18.35135349                   | 0    | 6.694086386 |             |                     |
| 0.000105098                      | 1                                      | SENP3-EIF4A1                  | 17   | 7563287     | 7578715     | +                   |
| 3519                             | protein_coding                         | SENP3-EIF4A1 readthrough (NMD |      |             |             |                     |
| candidate)                       | [Source:HGNC                           | Symbol;Acc:HGNC:49182]        | -    | 5           | 31          |                     |
| 21                               | 0                                      | 0                             | 0    | 0.077704371 | 0.388397463 |                     |
| 0.276441018                      | 0                                      | 0                             | 0    |             |             |                     |
| ENSG0000011028                   | 3488.239452                            | 2842.959149                   |      | 7165.306794 |             |                     |
| 1444.583483                      | 1053.680439                            | 1468.879633                   |      | 4498.835132 |             |                     |
| 1322.381185                      | 1.766465642                            | 0.000105571                   |      | 0.001709218 |             | MRC2                |
| 17                               | 62627401                               | 62693597                      |      | +           | 6860        |                     |
| protein_coding                   | mannose receptor C type 2              | [Source:HGNC                  |      |             |             |                     |
| Symbol;Acc:HGNC:16875]           | -                                      | 3015                          | 3067 | 7328        | 1438        | 1153                |
| 1497                             | 24.03576302                            | 19.711679                     |      | 49.48388635 |             |                     |
| 10.1352855                       | 7.324260618                            | 10.18693935                   |      |             |             |                     |



|                                     |                                                       |             |             |        |  |
|-------------------------------------|-------------------------------------------------------|-------------|-------------|--------|--|
| ENSG00000133134                     | 20.82531016                                           | 16.68512054 | 0.977798416 |        |  |
| 106.4852915                         | 60.31475191                                           | 82.42210364 | 12.8294097  |        |  |
| 83.07404903                         | -2.703713516                                          | 0.000105659 | 0.001709218 | BEX2   |  |
| X                                   | 103309346                                             | 103311046   | - 1176      |        |  |
| protein_coding                      | brain expressed X-linked 2 [Source:HGNC               |             |             |        |  |
| Symbol;Acc:HGNC:30933]              | -                                                     | 18 18       | 1 106       | 66     |  |
| 84                                  | 0.837066374                                           | 0.674837397 | 0.03939083  |        |  |
| 4.358125777                         | 2.445655107                                           | 3.334402325 |             |        |  |
| ENSG00000101152                     | 3565.755885                                           | 4134.202088 | 4295.468442 |        |  |
| 6434.323512                         | 5434.724691                                           | 5403.553866 | 3998.475472 |        |  |
| 5757.534023                         | -0.525769293                                          | 0.000106165 | 0.001715581 | DNAJC5 |  |
| 20                                  | 63895182                                              | 63936031    | + 5287      |        |  |
| protein_coding                      | DnaJ heat shock protein family (Hsp40) member C5      |             |             |        |  |
| [Source:HGNC Symbol;Acc:HGNC:16235] | -                                                     |             | 3082 4460   | 4393   |  |
| 6405                                | 5947 5507                                             | 31.87997974 | 37.19285408 |        |  |
| 38.49057054                         | 58.57483045                                           | 49.01705625 | 48.6241253  |        |  |
| ENSG00000121680                     | 551.8707193                                           | 778.6389583 | 702.0592628 |        |  |
| 1117.090983                         | 1044.54184                                            | 1111.717184 | 677.5229801 |        |  |
| 1091.116669                         | -0.686139648                                          | 0.000108463 | 0.001750866 | PEX16  |  |
| 11                                  | 45909669                                              | 45918812    | - 3013      |        |  |
| protein_coding                      | peroxisomal biogenesis factor 16 [Source:HGNC         |             |             |        |  |
| Symbol;Acc:HGNC:8857]               | -                                                     | 477 840     | 718 1112    | 1143   |  |
| 1133                                | 8.657927805                                           | 12.29176114 | 11.03895005 |        |  |
| 17.84460225                         | 16.5312501                                            | 17.5540291  |             |        |  |
| ENSG00000169499                     | 1123.409787                                           | 1075.263323 | 1370.873379 |        |  |
| 442.0144177                         | 872.7361829                                           | 634.8464411 | 1189.84883  |        |  |
| 649.8656806                         | 0.872007831                                           | 0.0001086   | 0.001751233 |        |  |
| PLEKHA2 8                           | 38901235                                              | 38973909    | + 6325      |        |  |
| protein_coding                      | pleckstrin homology domain containing A2 [Source:HGNC |             |             |        |  |
| Symbol;Acc:HGNC:14336]              | -                                                     | 971 1160    | 1402 440    | 955    |  |
| 647                                 | 8.39563236                                            | 8.085956811 | 10.26809645 |        |  |
| 3.363514956                         | 6.579629506                                           | 4.775180437 |             |        |  |
| ENSG00000023697                     | 876.9769502                                           | 792.5432254 | 669.7919151 |        |  |
| 515.3486279                         | 428.6002825                                           | 465.0961562 | 779.7706969 |        |  |
| 469.6816889                         | 0.731166935                                           | 0.000110988 | 0.001787862 | DERA   |  |
| 12                                  | 15911172                                              | 16037282    | + 2844      |        |  |
| protein_coding                      | deoxyribose-phosphate aldolase [Source:HGNC           |             |             |        |  |
| Symbol;Acc:HGNC:24269]              | -                                                     | 758 855     | 685 513     | 469    |  |
| 474                                 | 14.57586463                                           | 13.25471764 | 11.1574111  |        |  |
| 8.721455908                         | 7.186242169                                           | 7.780272093 |             |        |  |
| ENSG00000105723                     | 1544.543837                                           | 2071.7358   | 1903.773516 |        |  |
| 2602.862173                         | 2777.220167                                           | 2840.618929 | 1840.017718 |        |  |
| 2740.233757                         | -0.574029443                                          | 0.000111389 | 0.001792422 | GSK3A  |  |
| 19                                  | 42230186                                              | 42242625    | - 4126      |        |  |
| protein_coding                      | glycogen synthase kinase 3 alpha [Source:HGNC         |             |             |        |  |
| Symbol;Acc:HGNC:4616]               | -                                                     | 1335 2235   | 1947 2591   | 3039   |  |
| 2895                                | 17.69484468                                           | 23.88263613 | 21.85944764 |        |  |
| 30.3626313                          | 32.09667718                                           | 32.7540781  |             |        |  |
| ENSG00000147145                     | 75.20250892                                           | 67.66743328 | 101.6910353 |        |  |
| 25.11445555                         | 18.27719755                                           | 18.64309487 | 81.52032583 |        |  |

|                          |                                                  |                        |                 |        |
|--------------------------|--------------------------------------------------|------------------------|-----------------|--------|
| 20.67824932              | 1.980664492                                      | 0.000112636            | 0.001810586     | LPAR4  |
| X                        | 78747709                                         | 78757094               | + 3113          |        |
| protein_coding           | lysophosphatidic acid receptor 4                 | [Source:HGNC           |                 |        |
| Symbol;Acc:HGNC:4478]    | -                                                | 65 73                  | 104 25          | 20     |
| 19                       | 1.141902303                                      | 1.033898005            | 1.547592707     |        |
| 0.388295274              | 0.279968695                                      | 0.284918413            |                 |        |
| ENSG00000198053          | 341.3036943                                      | 290.1357071            | 411.6531332     |        |
| 178.8149235              | 180.9442557                                      | 175.637578             | 347.6975115     |        |
| 178.4655857              | 0.96196814                                       | 0.000112979            | 0.001814176     | SIRPA  |
| 20                       | 1894167 1940592                                  | + 5068                 | protein_coding  | signal |
| regulatory protein alpha | [Source:HGNC                                     | Symbol;Acc:HGNC:9662]  | -               |        |
| 295                      | 313 421                                          | 178 198                | 179 3.183318715 |        |
| 2.722962681              | 3.848114141                                      | 1.698183483            | 1.70250024      |        |
| 1.64877905               |                                                  |                        |                 |        |
| ENSG00000171135          | 1234.478108                                      | 1407.111832            | 1010.065764     |        |
| 1852.442241              | 1865.18801                                       | 1866.271918            | 1217.218568     |        |
| 1861.300723              | -0.61260902                                      | 0.000113097            | 0.001814176     | JAGN1  |
| 3                        | 9890572 9894349                                  | + 1781                 | protein_coding  |        |
| jagunal homolog 1        | [Source:HGNC                                     | Symbol;Acc:HGNC:26926] | -               | 1067   |
| 1518                     | 1033 1844                                        | 2041 1902              | 32.76387141     |        |
| 37.57870502              | 26.86821766                                      | 50.06084935            | 49.93875178     |        |
| 49.85315279              |                                                  |                        |                 |        |
| ENSG00000131943          | 994.9870411                                      | 1192.059167            | 1150.868736     |        |
| 1645.499128              | 1668.708136                                      | 1623.911685            | 1112.638315     |        |
| 1646.03965               | -0.564408688                                     | 0.000113857            | 0.001824458     |        |
| C19orf12                 | 19 29698886                                      | 29715789               | -               | 5378   |
| protein_coding           | chromosome 19 open reading frame 12              |                        |                 |        |
| [Source:HGNC             | Symbol;Acc:HGNC:25443]                           | -                      | 860 1286        | 1177   |
| 1638                     | 1826 1655                                        | 8.745252758            | 10.54275535     |        |
| 10.13813618              | 14.7263228                                       | 14.79580412            | 14.36558235     |        |
| ENSG00000087510          | 90.24301071                                      | 142.7504757            | 109.5134226     |        |
| 48.21975466              | 21.93263706                                      | 9.812155195            | 114.1689697     |        |
| 26.65484897              | 2.10219712                                       | 0.000114071            | 0.001825972     | TFAP2C |
| 20                       | 56629302                                         | 56639283               | + 3005          |        |
| protein_coding           | transcription factor AP-2 gamma                  | [Source:HGNC           |                 |        |
| Symbol;Acc:HGNC:11744]   | AP-2                                             | 78 154                 | 112 48          | 24     |
| 10                       | 1.419530862                                      | 2.25948885             | 1.726537447     |        |
| 0.772321238              | 0.348036957                                      | 0.155346531            |                 |        |
| ENSG00000138095          | 5171.61869                                       | 4159.229769            | 4393.248284     |        |
| 3198.577059              | 3251.513444                                      | 3196.800162            | 4574.698914     |        |
| 3215.630222              | 0.508328929                                      | 0.000114235            | 0.001826684     | LRPPRC |
| 2                        | 43886508                                         | 43996005               | - 9760          |        |
| protein_coding           | leucine rich pentatricopeptide repeat containing |                        |                 |        |
| [Source:HGNC             | Symbol;Acc:HGNC:15714]                           | -                      | 4470 4487       | 4493   |
| 3184                     | 3558 3258                                        | 25.04680982            | 20.26936811     |        |
| 21.32500083              | 15.7733688                                       | 15.88600606            | 15.58286464     |        |
| ENSG00000204103          | 2877.363688                                      | 2031.876901            | 1816.749457     |        |
| 4012.285419              | 3110.779023                                      | 3703.10737             | 2241.996682     |        |
| 3608.723937              | -0.687153476                                     | 0.000114489            | 0.001828829     | MAFB   |
| 20                       | 40685848                                         | 40689240               | - 3393          |        |



|                                   |                                            |                  |                  |       |
|-----------------------------------|--------------------------------------------|------------------|------------------|-------|
| 1908                              | 11.60640179                                | 12.2427291       | 11.92812695      |       |
| 17.14013408                       | 17.06194404                                | 17.45415538      |                  |       |
| ENSG00000168393                   | 1254.146456                                | 1352.421714      | 1585.011233      |       |
| 987.5003922                       | 903.8074188                                | 824.2210364      | 1397.193135      |       |
| 905.1762825                       | 0.626623937                                | 0.000119424      | 0.001893819      | DTYMK |
| 2                                 | 241675742                                  | 241686991        | - 2451           |       |
| protein_coding                    | deoxythymidylate kinase [Source:HGNC       |                  |                  |       |
| Symbol;Acc:HGNC:3061]             | -                                          | 1084 1459        | 1621 983         | 989   |
| 840                               | 24.18692643                                | 26.24496142      | 30.63671238      |       |
| 19.39150083                       | 17.58375314                                | 15.99860112      |                  |       |
| ENSG00000077463                   | 389.8960847                                | 762.8807889      | 616.0130022      |       |
| 1222.571696                       | 901.979699                                 | 1145.078511      | 589.5966253      |       |
| 1089.876635                       | -0.884601698                               | 0.000120251      | 0.001904955      | SIRT6 |
| 19                                | 4174109 4182604                            | - 2787           | protein_coding   |       |
| sirtuin 6 [Source:HGNC            | Symbol;Acc:HGNC:14934]                     |                  |                  |       |
| 630                               | 1217 987                                   | 1167 6.612834366 | 13.0195755       | 823   |
| 10.47143103                       | 21.11323716                                | 15.4325887       | 19.54699146      |       |
| ENSG00000244038                   | 5651.757786                                | 7014.239283      | 8724.895267      |       |
| 4100.688302                       | 4651.546776                                | 5105.264348      | 7130.297445      |       |
| 4619.166475                       | 0.626440903                                | 0.000120553      | 0.001906615      | DDOST |
| 1                                 | 20651767                                   | 20661544         | - 2721           |       |
| protein_coding                    | dolichyl-diphosphooligosaccharide--protein |                  |                  |       |
| glycosyltransferase non-catalytic | subunit [Source:HGNC                       |                  |                  |       |
| Symbol;Acc:HGNC:2728]             | -                                          | 4885 7567        | 8923 4082        | 5090  |
| 5203                              | 98.18174328                                | 122.6109197      | 151.9094555      |       |
| 72.53467594                       | 81.5169343                                 | 89.26296736      |                  |       |
| ENSG00000104320                   | 3806.403913                                | 3274.918381      | 3180.778248      |       |
| 2476.285317                       | 2417.159376                                | 2306.837686      | 3420.70018       |       |
| 2400.094126                       | 0.510956901                                | 0.000120606      | 0.001906615      | NBN   |
| 8                                 | 89933336                                   | 90003228         | - 6156           |       |
| protein_coding                    | nibrin [Source:HGNC Symbol;Acc:HGNC:7652]  |                  |                  |       |
| 3290                              | 3533 3253                                  | 2465 2645        | 2351 29.22752223 | -     |
| 25.30340602                       | 24.47867509                                | 19.36063195      | 18.72344085      |       |
| 17.82789443                       |                                            |                  |                  |       |
| ENSG00000111674                   | 2377.556244                                | 3156.268635      | 1938.974259      |       |
| 3344.240901                       | 4757.554522                                | 4126.011259      | 2490.933046      |       |
| 4075.935561                       | -0.710349528                               | 0.000121177      | 0.001913663      | EN02  |
| 12                                | 6913745 6923698                            | + 4281           | protein_coding   |       |
| enolase 2 [Source:HGNC            | Symbol;Acc:HGNC:3353]                      |                  |                  |       |
| 1983                              | 3329 5206                                  | 4205 26.25193445 | 35.06758403      |       |
| 21.45754056                       | 37.59843635                                | 52.99288134      | 45.8529          |       |
| ENSG00000204227                   | 926.7263022                                | 1138.296001      | 1057.977886      |       |
| 1495.816973                       | 1511.524237                                | 1696.521633      | 1041.000063      |       |
| 1567.954281                       | -0.590234653                               | 0.000121871      | 0.001922642      | RING1 |
| 6                                 | 33208495                                   | 33212722         | + 1818           |       |
| protein_coding                    | ring finger protein 1 [Source:HGNC         |                  |                  |       |
| Symbol;Acc:HGNC:10018]            | -                                          | 801 1228         | 1082 1489        | 1654  |
| 1729                              | 24.09535615                                | 29.78094304      | 27.56994106      |       |
| 39.60062455                       | 39.64607736                                | 44.39633811      |                  |       |
| ENSG00000267209                   | 3.470885027                                | 2.780853423      | 0 53.24264577    |       |

|                                     |                                                          |             |             |             |             |
|-------------------------------------|----------------------------------------------------------|-------------|-------------|-------------|-------------|
|                                     | 47.52071363                                              | 9.812155195 | 2.083912817 | 36.85850486 |             |
|                                     | -4.165768144                                             | 0.000122447 | 0.00192862  | LINC01897   |             |
|                                     | 18                                                       | 57961231    | 57964434    | -           | 405         |
| lincRNA                             | long intergenic non-protein coding RNA 1897 [Source:HGNC |             |             |             |             |
| Symbol;Acc:HGNC:52716]              | -                                                        | 3           | 3           | 0           | 53 52       |
|                                     | 10                                                       | 0.405098788 | 0.326587975 | 0           | 6.32735298  |
|                                     | 5.595087957                                              | 1.152632903 |             |             |             |
| ENSG00000136938                     | 3248.748385                                              | 3753.225169 | 4037.32966  |             |             |
| 2429.070141                         | 2507.631504                                              | 2731.704006 | 3679.767738 |             |             |
| 2556.135217                         | 0.525865341                                              | 0.000122502 | 0.00192862  | ANP32B      |             |
|                                     | 9                                                        | 97983361    | 98015943    | +           | 1850        |
| protein_coding                      | acidic nuclear phosphoprotein 32 family member B         |             |             |             |             |
| [Source:HGNC Symbol;Acc:HGNC:16677] | -                                                        |             | 2808        | 4049        | 4129        |
|                                     | 2418                                                     | 2744        | 2784        | 83.00802632 | 96.49615447 |
| 103.3893037                         | 63.1954462                                               | 64.63547971 | 70.24954867 |             |             |
| ENSG00000100949                     | 660.6251168                                              | 600.6643393 | 620.9019943 |             |             |
| 851.8823323                         | 1096.631853                                              | 1032.238726 | 627.3971501 |             |             |
| 993.5843039                         | -0.663906288                                             | 0.000122755 | 0.001930581 |             |             |
| RABGGTA 14                          | 24265538                                                 | 24271739    | -           | 3545        |             |
| protein_coding                      | Rab geranylgeranyltransferase subunit alpha              |             |             |             |             |
| [Source:HGNC Symbol;Acc:HGNC:9795]  | -                                                        |             | 571         | 648         | 635         |
|                                     | 848                                                      | 1200        | 1052        | 8.808756023 | 8.059214675 |
| 8.297742273                         | 11.56593718                                              | 14.75107273 | 13.85305429 |             |             |
| ENSG00000069399                     | 289.2404189                                              | 542.2664174 | 677.6143024 |             |             |
| 236.0758822                         | 229.3788292                                              | 242.3602333 | 503.0403796 |             |             |
| 235.9383149                         | 1.093657154                                              | 0.000122879 | 0.001930581 | BCL3        |             |
|                                     | 19                                                       | 44747705    | 44760044    | +           | 3242        |
| protein_coding                      | B cell CLL/lymphoma 3 [Source:HGNC                       |             |             |             |             |
| Symbol;Acc:HGNC:998]                | -                                                        | 250         | 585         | 693         | 235 251     |
|                                     | 247                                                      | 4.217175851 | 7.955670974 | 9.90199448  |             |
| 3.504742122                         | 3.373799804                                              | 3.55655868  |             |             |             |
| ENSG00000125868                     | 6935.985246                                              | 5297.52577  | 5567.584182 |             |             |
| 3669.724245                         | 4544.62517                                               | 3795.341629 | 5933.698399 |             |             |
| 4003.230348                         | 0.567498542                                              | 0.00012357  | 0.00193944  | DSTN        |             |
|                                     | 20                                                       | 17569863    | 17609919    | +           | 3851        |
| protein_coding                      | "destrin, actin depolymerizing factor [Source:HGNC       |             |             |             |             |
| Symbol;Acc:HGNC:15750]"             | -                                                        | 5995        | 5715        | 5694        | 3653 4973   |
|                                     | 3868                                                     | 85.13543934 | 65.42996291 | 68.49303331 |             |
| 45.86457464                         | 56.27344958                                              | 46.88770572 |             |             |             |
| ENSG00000163902                     | 7067.878877                                              | 5935.268155 | 7673.76197  |             |             |
| 4524.620312                         | 4883.667185                                              | 5038.541692 | 6892.303001 |             |             |
| 4815.60973                          | 0.517187425                                              | 0.000124427 | 0.001950891 | RPN1        |             |
|                                     | 3                                                        | 128619970   | 128681075   | -           | 3992        |
| protein_coding                      | ribophorin I [Source:HGNC Symbol;Acc:HGNC:10381]         |             |             |             |             |
| -                                   | 6109                                                     | 6403        | 7848        | 4504        | 5344 5135   |
| 83.6901421                          | 70.71750457                                              | 91.06907335 | 54.55179755 |             |             |
| 58.33571357                         | 60.04764107                                              |             |             |             |             |
| ENSG00000075790                     | 2512.92076                                               | 1785.307897 | 1805.015876 |             |             |
| 1391.340838                         | 1328.752262                                              | 1130.360278 | 2034.414844 |             |             |
| 1283.484459                         | 0.664008362                                              | 0.000124567 | 0.001951081 | BCAP29      |             |

|                        |                                                     |             |             |           |  |
|------------------------|-----------------------------------------------------|-------------|-------------|-----------|--|
| 7                      | 107579977                                           | 107629170   | +           | 8409      |  |
| protein_coding         | B cell receptor associated protein 29 [Source:HGNC  |             |             |           |  |
| Symbol;Acc:HGNC:24131] | -                                                   | 2172 1926   | 1846 1385   | 1454      |  |
| 1152                   | 14.12570659                                         | 10.09824465 | 10.16927051 |           |  |
| 7.963548647            | 7.534920106                                         | 6.395200464 |             |           |  |
| ENSG00000149554        | 1741.227322                                         | 1692.612783 | 1643.679138 |           |  |
| 1066.862072            | 1207.208898                                         | 1204.932658 | 1692.506414 |           |  |
| 1159.667876            | 0.54521767                                          | 0.000125256 | 0.001959859 | CHEK1     |  |
| 11                     | 125625136                                           | 125676255   | +           | 6558      |  |
| protein_coding         | checkpoint kinase 1 [Source:HGNC                    |             |             |           |  |
| Symbol;Acc:HGNC:1925]  | -                                                   | 1505 1826   | 1681 1062   | 1321 1228 |  |
| 12.55046452            | 12.27618201                                         | 11.87404682 | 7.829865843 |           |  |
| 8.777887349            | 8.741238911                                         |             |             |           |  |
| ENSG00000025039        | 21.98227184                                         | 56.54401959 | 7.822387329 |           |  |
| 127.5814342            | 213.8432113                                         | 76.53481052 | 28.78289292 |           |  |
| 139.3198187            | -2.269957037                                        | 0.000125992 | 0.001969367 | RRAGD     |  |
| 6                      | 89364636                                            | 89412270    | -           | 5072      |  |
| protein_coding         | Ras related GTP binding D [Source:HGNC              |             |             |           |  |
| Symbol;Acc:HGNC:19903] | -                                                   | 19 61       | 8 127       | 234       |  |
| 78                     | 0.204865614                                         | 0.530254726 | 0.073065641 |           |  |
| 1.210669754            | 2.010458951                                         | 0.717895769 |             |           |  |
| ENSG00000031698        | 5064.021255                                         | 5102.86603  | 4546.762635 |           |  |
| 6833.141066            | 6496.629869                                         | 6850.846757 | 4904.549973 |           |  |
| 6726.872564            | -0.455832415                                        | 0.000126218 | 0.001969695 | SARS      |  |
| 1                      | 109213918                                           | 109238169   | +           | 3836      |  |
| protein_coding         | seryl-tRNA synthetase [Source:HGNC                  |             |             |           |  |
| Symbol;Acc:HGNC:10537] | -                                                   | 4377 5505   | 4650 6802   | 7109      |  |
| 6982                   | 62.40115969                                         | 63.27216321 | 56.15349736 |           |  |
| 85.73521585            | 80.75855015                                         | 84.96641254 |             |           |  |
| ENSG00000117569        | 918.6275705                                         | 638.669336  | 816.4616775 |           |  |
| 503.2936892            | 484.345735                                          | 397.3922854 | 791.2528614 |           |  |
| 461.6772365            | 0.776406692                                         | 0.000126271 | 0.001969695 | PTBP2     |  |
| 1                      | 96721665                                            | 96823738    | +           | 12937     |  |
| protein_coding         | polypyrimidine tract binding protein 2 [Source:HGNC |             |             |           |  |
| Symbol;Acc:HGNC:17662] | -                                                   | 794 689     | 835 501     | 530       |  |
| 405                    | 3.356461245                                         | 2.348116291 | 2.989890981 |           |  |
| 1.872429023            | 1.785257594                                         | 1.461394542 |             |           |  |
| ENSG00000168040        | 362.1290045                                         | 515.3848343 | 387.2081728 |           |  |
| 730.3283674            | 762.1591378                                         | 668.2077688 | 421.5740039 |           |  |
| 720.231758             | -0.771360796                                        | 0.000127041 | 0.001979687 | FADD      |  |
| 11                     | 70203163                                            | 70207390    | +           | 1841      |  |
| protein_coding         | Fas associated via death domain [Source:HGNC        |             |             |           |  |
| Symbol;Acc:HGNC:3573]  | -                                                   | 313 556     | 396 727     | 834       |  |
| 681                    | 9.297908367                                         | 13.3154228  | 9.964232515 |           |  |
| 19.09333704            | 19.74107779                                         | 17.26789341 |             |           |  |
| ENSG00000221829        | 572.6960295                                         | 692.4325022 | 780.2831361 |           |  |
| 330.506235             | 425.8587029                                         | 424.8663199 | 681.8038893 |           |  |
| 393.7437526            | 0.792420237                                         | 0.000127715 | 0.001988165 | FANCG     |  |
| 9                      | 35073835                                            | 35080016    | -           | 3614      |  |
| protein_coding         | FA complementation group G [Source:HGNC             |             |             |           |  |

|                                     |                                                     |              |             |                |       |            |
|-------------------------------------|-----------------------------------------------------|--------------|-------------|----------------|-------|------------|
| Symbol;Acc:HGNC:3588]               | -                                                   | 495          | 747         | 798            | 329   | 466        |
| 433                                 | 7.490516473                                         | 9.113105784  | 10.22862364 |                |       |            |
| 4.401583715                         | 5.618965508                                         | 5.593012423  |             |                |       |            |
| ENSG00000196821                     | 2714.232091                                         | 3474.212876  | 3453.584006 |                |       |            |
| 4787.819806                         | 4353.628456                                         | 4856.035606  | 3214.009658 |                |       |            |
| 4665.827956                         | -0.537386374                                        | 0.000128373  | 0.001996381 |                |       |            |
| C6orf106                            | 6                                                   | 34587288     | 34696859    | -              |       | 4551       |
| protein_coding                      | chromosome 6 open reading frame 106                 |              |             |                |       |            |
| [Source:HGNC Symbol;Acc:HGNC:21215] | -                                                   | 2346         | 3748        |                |       | 3532       |
| 4766                                | 4764                                                | 4949         | 28.19135075 | 36.31003811    |       |            |
| 35.95144206                         | 50.63472073                                         | 45.61666331  | 50.7640957  |                |       |            |
| ENSG00000136156                     | 3291.555967                                         | 2706.697331  | 2724.146387 |                |       |            |
| 1948.881751                         | 2111.930177                                         | 1967.337117  | 2907.466562 |                |       |            |
| 2009.383015                         | 0.532616254                                         | 0.000130304  | 0.002024344 |                |       | ITM2B      |
| 13                                  | 48232612                                            | 48270357     | +           | 10706          |       |            |
| protein_coding                      | integral membrane protein 2B                        | [Source:HGNC |             |                |       |            |
| Symbol;Acc:HGNC:6174]               | -                                                   | 2845         | 2920        | 2786           | 1940  | 2311       |
| 2005                                | 14.53281498                                         | 12.02512419  | 12.05469784 |                |       |            |
| 8.761444362                         | 9.40657027                                          | 8.742450334  |             |                |       |            |
| ENSG00000142621                     | 229.0784118                                         | 289.2087559  | 197.5152801 |                |       |            |
| 433.9777919                         | 386.5627281                                         | 555.367984   | 238.6008159 |                |       |            |
| 458.636168                          | -0.941712955                                        | 0.000132787  | 0.00206082  |                |       | FHAD1      |
| 1                                   | 15247272                                            | 15400283     | +           | 12805          |       |            |
| protein_coding                      | forkhead associated phosphopeptide binding domain 1 |              |             |                |       |            |
| [Source:HGNC Symbol;Acc:HGNC:29408] | -                                                   | 198          | 312         | 202            |       |            |
| 432                                 | 423                                                 | 566          | 0.84562988  | 1.074258922    |       |            |
| 0.730759117                         | 1.631193118                                         | 1.439525566  | 2.063397425 |                |       |            |
| ENSG00000179772                     | 61.31896881                                         | 43.56670362  | 27.37835565 | 0              |       |            |
| 1.827719755                         | 8.830939675                                         | 44.08800936  | 3.552886477 |                |       |            |
| 3.633648977                         | 0.000134137                                         | 0.002079668  | FOXS1       | 20             |       |            |
| 31844301                            | 31845619                                            | -            | 1319        | protein_coding |       |            |
| forkhead box S1                     | [Source:HGNC Symbol;Acc:HGNC:3735]                  |              |             | Fork           |       |            |
| 53                                  | 47                                                  | 28           | 0           | 2              | 9     | 2.19748433 |
| 1.571039196                         | 0.983367139                                         | 0            | 0.066076008 |                |       |            |
| 0.318525165                         |                                                     |              |             |                |       |            |
| ENSG00000155660                     | 3472.041989                                         | 4085.073678  | 5294.778424 |                |       |            |
| 2528.523385                         | 2535.0473                                           | 3154.607895  | 4283.964697 |                |       |            |
| 2739.39286                          | 0.645290211                                         | 0.00013457   | 0.002084274 |                |       | PDIA4      |
| 7                                   | 149003062                                           | 149028641    | -           | 3277           |       |            |
| protein_coding                      | protein disulfide isomerase family A member 4       |              |             |                |       |            |
| [Source:HGNC Symbol;Acc:HGNC:30167] | -                                                   | 3001         | 4407        | 5415           |       |            |
| 2517                                | 2774                                                | 3215         | 50.08230016 | 59.29260988    |       |            |
| 76.54634798                         | 37.1371003                                          | 36.88829761  | 45.79842803 |                |       |            |
| ENSG00000167522                     | 7830.316621                                         | 9194.428366  | 10273.72796 |                |       |            |
| 15580.00365                         | 11711.11433                                         | 12972.65038  | 9099.490982 |                |       |            |
| 13421.25612                         | -0.560547568                                        | 0.000140368  | 0.002171864 |                |       |            |
| ANKRD11                             | 16                                                  | 89267619     | 89490561    | -              | 19538 |            |
| protein_coding                      | ankyrin repeat domain 11                            | [Source:HGNC |             |                |       |            |
| Symbol;Acc:HGNC:21316]              | -                                                   | 6768         | 9919        | 10507          | 15509 | 12815      |
| 13221                               | 18.94414275                                         | 22.38317772  | 24.91156908 |                |       |            |

|                                  |                                                                                                    |             |             |             |             |      |
|----------------------------------|----------------------------------------------------------------------------------------------------|-------------|-------------|-------------|-------------|------|
| 38.37999441                      | 28.58229538                                                                                        | 31.58858962 |             |             |             |      |
| ENSG00000166189                  | 458.1568236                                                                                        | 685.0168931 | 800.8169028 |             |             |      |
| 982.4775011                      | 1221.830656                                                                                        | 1178.439839 | 647.9968732 |             |             |      |
| 1127.582665                      | -0.798017139                                                                                       | 0.000142382 | 0.002199725 | HPS6        |             |      |
| 10                               | 102065390                                                                                          | 102068038   | +           | 2649        |             |      |
| protein_coding                   | "HPS6, biogenesis of lysosomal organelles complex 2 subunit 3 [Source:HGNC Symbol;Acc:HGNC:18817]" |             |             |             |             |      |
|                                  | -                                                                                                  | 396         | 739         |             |             |      |
| 819                              | 978                                                                                                | 1337        | 1201        | 8.175379852 | 12.29975436 |      |
|                                  | 14.32202407                                                                                        | 17.85081762 | 21.99419376 | 21.16445477 |             |      |
| ENSG00000149548                  | 673.3516953                                                                                        | 649.7927497 | 775.394144  |             |             |      |
| 425.9411661                      | 405.7537856                                                                                        | 458.2276476 | 699.512863  |             |             |      |
| 429.9741998                      | 0.702347029                                                                                        | 0.000142456 | 0.002199725 | CCDC15      |             |      |
| 11                               | 124954121                                                                                          | 125041489   | +           | 4823        |             |      |
| protein_coding                   | coiled-coil domain containing 15 [Source:HGNC Symbol;Acc:HGNC:25798]                               |             |             |             |             |      |
|                                  | -                                                                                                  | 582         | 701         | 793         | 424         | 444  |
| 467                              | 6.59933896                                                                                         | 6.408180175 | 7.616551469 |             |             |      |
| 4.250595823                      | 4.011661734                                                                                        | 4.520075141 |             |             |             |      |
| ENSG00000104147                  | 138.8354011                                                                                        | 149.2391337 | 162.3145371 |             |             |      |
| 37.16939421                      | 47.52071363                                                                                        | 75.553595   | 150.1296906 |             |             |      |
| 53.41456761                      | 1.491335491                                                                                        | 0.000142852 | 0.002203613 | OIP5        |             |      |
| 15                               | 41309268                                                                                           | 41332621    | -           | 1236        |             |      |
| protein_coding                   | Opa interacting protein 5 [Source:HGNC Symbol;Acc:HGNC:20300]                                      |             |             |             |             |      |
|                                  | -                                                                                                  | 120         | 161         | 166         | 37          | 52   |
| 77                               | 5.309547226                                                                                        | 5.743033681 | 6.22145656  |             |             |      |
| 1.447386341                      | 1.833341928                                                                                        | 2.908159957 |             |             |             |      |
| ENSG00000211592                  | 10.41265508                                                                                        | 21.31987624 | 63.55689705 | 0           |             |      |
| 0                                | 2.943646558                                                                                        | 31.76314279 | 0.981215519 |             |             |      |
| 5.031797525                      | 0.000143569                                                                                        | 0.002211169 | IGKC        | 2           |             |      |
| 88857161                         | 88857683                                                                                           | -           | 523         | IG_C_gene   |             |      |
| immunoglobulin                   | kappa constant [Source:HGNC Symbol;Acc:HGNC:5716]                                                  |             |             |             |             |      |
|                                  | -                                                                                                  | 9           | 23          | 65          | 0           | 3    |
| 0.94109948                       | 1.938920959                                                                                        | 5.757237209 | 0           | 0           |             |      |
| 0.267772271                      |                                                                                                    |             |             |             |             |      |
| ENSG00000243742                  | 155.0328645                                                                                        | 141.8235245 | 55.73450972 |             |             |      |
| 386.7626155                      | 239.4312879                                                                                        | 288.4773627 | 117.5302996 |             |             |      |
| 304.890422                       | -1.376843072                                                                                       | 0.000143631 | 0.002211169 |             |             |      |
| RPLP0P2                          | 11                                                                                                 | 61615036    | 61639449    | +           | 3909        |      |
| transcribed_processed_pseudogene | ribosomal protein lateral stalk subunit P0 pseudogene 2 [Source:HGNC Symbol;Acc:HGNC:17960]        |             |             |             |             |      |
|                                  | -                                                                                                  | 134         | 153         | 57          | 385         | 262  |
| 1.874708898                      | 1.725677825                                                                                        | 0.675478672 | 4.762075488 |             |             |      |
| 2.920748879                      | 3.510974666                                                                                        |             |             |             |             |      |
| ENSG00000095002                  | 2611.262502                                                                                        | 2209.85152  | 2047.509883 |             |             |      |
| 1689.700569                      | 1513.351957                                                                                        | 1388.41996  | 2289.541302 |             |             |      |
| 1530.490829                      | 0.580785502                                                                                        | 0.000144239 | 0.002218298 | MSH2        |             |      |
| 2                                | 47402969                                                                                           | 47663146    | +           | 13777       |             |      |
| protein_coding                   | mutS homolog 2 [Source:HGNC Symbol;Acc:HGNC:7325]                                                  |             |             |             |             |      |
|                                  | -                                                                                                  | 2257        | 2384        | 2094        | 1682        | 1656 |
| 8.959249134                      | 7.629315073                                                                                        | 7.040839991 | 5.902996824 |             |             |      |
| 5.237985258                      | 4.794549616                                                                                        |             |             |             |             |      |



|                                      |                                                   |             |             |             |
|--------------------------------------|---------------------------------------------------|-------------|-------------|-------------|
| ENSG00000163359                      | 33677.99742                                       | 17053.12014 | 39222.42787 |             |
| 12643.6215                           | 8442.237548                                       | 12901.02165 | 29984.51514 |             |
| 11328.96023                          | 1.404202378                                       | 0.00014462  | 0.002221922 | COL6A3      |
| 2                                    | 237324003                                         | 237414375   | - 19633     |             |
| protein_coding                       | collagen type VI alpha 3 chain [Source:HGNC       |             |             |             |
| Symbol;Acc:HGNC:2213]                | -                                                 | 29109 18397 | 40113 12586 | 9238        |
| 13148                                | 81.08403123                                       | 41.3137198  | 94.64570983 |             |
| 30.99575913                          | 20.50453331                                       | 31.26216599 |             |             |
| ENSG00000160360                      | 917.4706088                                       | 1267.14221  | 1291.671708 |             |
| 1734.906589                          | 1680.588315                                       | 2077.233255 | 1158.761509 |             |
| 1830.909386                          | -0.659129152                                      | 0.00014572  | 0.002236571 | GPSM1       |
| 9                                    | 136327476                                         | 136359605   | + 5138      |             |
| protein_coding                       | G protein signaling modulator 1 [Source:HGNC      |             |             |             |
| Symbol;Acc:HGNC:17858]               | -                                                 | 793 1367    | 1321 1727   | 1839        |
| 2117                                 | 8.44060934                                        | 11.73027983 | 11.90998387 |             |
| 16.2517246                           | 15.59718513                                       | 19.23414093 |             |             |
| ENSG00000113328                      | 1333.976812                                       | 1154.981121 | 1478.431205 |             |
| 575.6233212                          | 995.1934065                                       | 745.7237948 | 1322.463046 |             |
| 772.1801742                          | 0.77559844                                        | 0.000147242 | 0.002257664 | CCNG1       |
| 5                                    | 163437569                                         | 163446151   | + 3096      |             |
| protein_coding                       | cyclin G1 [Source:HGNC Symbol;Acc:HGNC:1592]      |             |             | -           |
| 1153                                 | 1246 1512 573 1089 760                            |             |             | 20.36681263 |
| 17.74398037                          | 22.62316146                                       | 8.948595689 | 15.32800119 |             |
| 11.45931549                          |                                                   |             |             |             |
| ENSG00000105810                      | 3783.26468                                        | 2613.075266 | 3695.100215 |             |
| 2404.960264                          | 2040.649106                                       | 2121.387953 | 3363.813387 |             |
| 2188.999108                          | 0.619653156                                       | 0.000149655 | 0.002292354 | CDK6        |
| 7                                    | 92604921                                          | 92836594    | - 12260     |             |
| protein_coding                       | cyclin dependent kinase 6 [Source:HGNC            |             |             |             |
| Symbol;Acc:HGNC:1777]                | -                                                 | 3270 2819   | 3779 2394   | 2233        |
| 2162                                 | 14.58653019                                       | 10.13767966 | 14.27870686 |             |
| 9.441367277                          | 7.937008596                                       | 8.232111712 |             |             |
| ENSG00000164077                      | 698.8048521                                       | 667.4048214 | 746.0601915 |             |
| 1192.43435                           | 959.5528713                                       | 1114.66083  | 704.089955  |             |
| 1088.882684                          | -0.628831229                                      | 0.000149814 | 0.002292496 | MON1A       |
| 3                                    | 49907160                                          | 49930173    | - 6446      |             |
| protein_coding                       | "MON1 homolog A, secretory trafficking associated |             |             |             |
| [Source:HGNC Symbol;Acc:HGNC:28207]" | -                                                 | 604 720     | 763         |             |
| 1187                                 | 1050 1136                                         | 5.124380268 | 4.924658879 |             |
| 5.483232896                          | 8.903517861                                       | 7.098353044 | 8.226859228 |             |
| ENSG00000124813                      | 1482.067907                                       | 1062.286007 | 1202.692052 |             |
| 879.0059443                          | 646.0989333                                       | 771.2353983 | 1249.015322 |             |
| 765.4467586                          | 0.706128591                                       | 0.000150614 | 0.002302441 | RUNX2       |
| 6                                    | 45328157                                          | 45664349    | + 8192      |             |
| protein_coding                       | runt related transcription factor 2 [Source:HGNC  |             |             |             |
| Symbol;Acc:HGNC:10472]               | Runt                                              | 1281 1146   | 1230 875    | 707         |
| 786                                  | 8.55172839                                        | 6.167776558 | 6.955328133 |             |
| 5.1643935                            | 3.760867803                                       | 4.478974999 |             |             |
| ENSG00000164211                      | 1081.759167                                       | 729.5105478 | 935.7530843 |             |
| 382.7443026                          | 585.7841814                                       | 576.9547254 | 915.6742663 |             |

|                                                      |                                                      |             |                |                |
|------------------------------------------------------|------------------------------------------------------|-------------|----------------|----------------|
| 515.1610698                                          | 0.828743729                                          | 0.000151774 | 0.002317844    | STARD4         |
| 5                                                    | 111496033                                            | 111512590   | - 5684         |                |
| protein_coding                                       | StAR related lipid transfer domain containing 4      |             |                |                |
| [Source:HGNC Symbol;Acc:HGNC:18058]                  | -                                                    | 935         | 787            | 957            |
| 381                                                  | 641 588                                              | 8.996058157 | 6.104563576    |                |
| 7.799384379                                          | 3.240948447                                          | 4.914310104 | 4.829134402    |                |
| ENSG00000149273                                      | 28826.85711                                          | 35936.04183 | 32414.99529    |                |
| 41329.35263                                          | 44346.87827                                          | 55747.75974 | 32392.63141    |                |
| 47141.33021                                          | -0.541300682                                         | 0.000152149 | 0.002321255    | RPS3           |
| 11                                                   | 75399486                                             | 75422280    | + 5894         |                |
| protein_coding                                       | ribosomal protein S3 [Source:HGNC                    |             |                |                |
| Symbol;Acc:HGNC:10420]                               | -                                                    | 24916 38768 | 33151 41141    | 48527          |
| 56815                                                | 231.1867307                                          | 289.9994827 | 260.5487283    |                |
| 337.4939008                                          | 358.7830436                                          | 449.98591   |                |                |
| ENSG00000185838                                      | 291.5543423                                          | 498.6997138 | 428.2757063    |                |
| 608.7744025                                          | 757.5898384                                          | 880.150321  | 406.1765874    |                |
| 748.8381873                                          | -0.880785295                                         | 0.000153022 | 0.002332256    | GNB1L          |
| 22                                                   | 19783224                                             | 19854939    | - 6988         |                |
| protein_coding                                       | G protein subunit beta 1 like [Source:HGNC           |             |                |                |
| Symbol;Acc:HGNC:4397]                                | -                                                    | 252 538     | 438 606        | 829            |
| 897                                                  | 1.972160959                                          | 3.39440249  | 2.903512299    |                |
| 4.192962172                                          | 5.169639178                                          | 5.992190098 |                |                |
| ENSG00000081803                                      | 387.5821614                                          | 225.2491272 | 359.8298171    |                |
| 76.34794487                                          | 173.6333767                                          | 151.10719   | 324.2203686    |                |
| 133.6961705                                          | 1.275785873                                          | 0.000153681 | 0.00233996     | CADPS2         |
| 7                                                    | 122318425                                            | 122886759   | - 6351         |                |
| protein_coding                                       | calcium dependent secretion activator 2 [Source:HGNC |             |                |                |
| Symbol;Acc:HGNC:16018]                               | -                                                    | 335 243     | 368 76         | 190            |
| 154                                                  | 2.884678429                                          | 1.686934106 | 2.684158527    |                |
| 0.578592362                                          | 1.303677247                                          | 1.131943224 |                |                |
| ENSG00000157954                                      | 2880.834573                                          | 2713.185989 | 2805.303656    |                |
| 3953.015304                                          | 3855.574823                                          | 3722.731681 | 2799.774739    |                |
| 3843.773936                                          | -0.457316962                                         | 0.000154034 | 0.002342996    | WIPI2          |
| 7                                                    | 5190188 5233826                                      | + 8977      | protein_coding | "WD            |
| repeat domain, phosphoinositide                      | interacting 2 [Source:HGNC                           |             |                |                |
| Symbol;Acc:HGNC:32225]"                              | -                                                    | 2490 2927   | 2869 3935      | 4219           |
| 3794                                                 | 15.16920549                                          | 14.37558263 | 14.80477389    |                |
| 21.19408774                                          | 20.48032754                                          | 19.72932092 |                |                |
| ENSG00000140538                                      | 38.1797353                                           | 32.44328993 | 44.00092873    |                |
| 5.02289111                                           | 0                                                    | 4.906077597 | 38.20798465    | 3.309656236    |
| 3.54436376                                           | 0.000155361                                          | 0.002360831 | NTRK3          | 15             |
| 87859751                                             | 88256768                                             | -           | 26750          | protein_coding |
| neurotrophic receptor tyrosine kinase 3 [Source:HGNC |                                                      |             |                |                |
| Symbol;Acc:HGNC:8033]                                | -                                                    | 33 35       | 45 5           | 0              |
| 5                                                    | 0.067465985                                          | 0.057687035 | 0.077927579    |                |
| 0.009037482                                          | 0                                                    | 0.008725539 |                |                |
| ENSG00000263528                                      | 350.5593877                                          | 397.6620394 | 525.0777495    |                |
| 211.9660048                                          | 213.8432113                                          | 249.2287419 | 424.4330589    |                |
| 225.0126527                                          | 0.916389672                                          | 0.000156489 | 0.002375611    | IKBKE          |
| 1                                                    | 206470476                                            | 206496889   | + 3791         |                |

|                            |                                                    |             |                |                                |             |                |
|----------------------------|----------------------------------------------------|-------------|----------------|--------------------------------|-------------|----------------|
| protein_coding             | inhibitor of nuclear factor kappa B kinase subunit |             |                |                                |             |                |
| epsilon                    | [Source:HGNC Symbol;Acc:HGNC:14552]                |             |                |                                |             |                |
|                            | -                                                  | 303         | 429            |                                |             |                |
|                            | 537                                                | 211         | 234            | 254                            | 4.371027681 | 4.989275271    |
|                            | 6.561799515                                        | 2.691100317 | 2.689804221    | 3.127706323                    |             |                |
| ENSG00000169855            | 2055.920898                                        | 1522.053773 | 2185.37946     |                                |             |                |
| 1324.034097                | 1069.216057                                        | 1269.692882 | 1921.118044    |                                |             |                |
| 1220.981012                | 0.653822941                                        | 0.000157621 | 0.002388345    |                                |             | ROB01          |
|                            | 3                                                  | 78597240    | 79767815       | -                              | 10875       |                |
| protein_coding             | roundabout guidance receptor 1 [Source:HGNC        |             |                |                                |             |                |
| Symbol;Acc:HGNC:10249]     | -                                                  | 1777        | 1642           | 2235                           | 1318        | 1170           |
|                            | 1294                                               | 8.936199893 | 6.656989089    | 9.520301835                    |             |                |
| 5.859861631                | 4.688297839                                        | 5.554577704 |                |                                |             |                |
| ENSG00000074695            | 3564.598923                                        | 2856.863416 | 3522.029895    |                                |             |                |
| 2004.133553                | 2195.091426                                        | 2523.686316 | 3314.497411    |                                |             |                |
| 2240.970432                | 0.564465942                                        | 0.00015764  | 0.002388345    |                                |             | LMAN1          |
|                            | 18                                                 | 59327823    | 59359962       | -                              | 6767        |                |
| protein_coding             | "lectin, mannose binding 1 [Source:HGNC            |             |                |                                |             |                |
| Symbol;Acc:HGNC:6631]"     | -                                                  | 3081        | 3082           | 3602                           | 1995        | 2402           |
|                            | 2572                                               | 24.89947754 | 20.08031013    | 24.65755371                    |             |                |
| 14.25436713                | 15.46804491                                        | 17.74274552 |                |                                |             |                |
| ENSG00000189052            | 17.35442514                                        | 15.75816939 | 15.64477466    |                                |             | 0              |
|                            | 0                                                  | 16.2524564  | 0              | 6.515156856                    |             |                |
| 0.000160838                | 1                                                  | CGB5        | 19             | 49043884                       | 49045311    |                |
|                            | +                                                  | 841         | protein_coding | chorionic gonadotropin subunit |             |                |
| beta 5                     | [Source:HGNC Symbol;Acc:HGNC:16452]                |             |                |                                |             |                |
|                            | -                                                  |             |                | 15                             | 17          |                |
|                            | 16                                                 | 0           | 0              | 0                              | 0.975416226 | 0.891224021    |
|                            | 0.881305423                                        | 0           | 0              | 0                              |             |                |
| ENSG00000152661            | 7100.273804                                        | 5527.409653 | 6914.012601    |                                |             |                |
| 3819.4064                  | 4797.764356                                        | 4703.9472   | 6513.898686    |                                |             |                |
| 4440.372652                | 0.552666198                                        | 0.000165082 | 0.002498628    |                                |             | GJA1           |
|                            | 6                                                  | 121435577   | 121449727      | +                              | 3413        |                |
| protein_coding             | gap junction protein alpha 1 [Source:HGNC          |             |                |                                |             |                |
| Symbol;Acc:HGNC:4274]      | -                                                  | 6137        | 5963           | 7071                           | 3802        | 5250           |
|                            | 4794                                               | 98.33645493 | 77.03045782    | 95.97254349                    |             |                |
| 53.86132597                | 67.03191286                                        | 65.57039158 |                |                                |             |                |
| ENSG00000271590            | 30.08100357                                        | 32.44328993 | 27.37835565    |                                |             | 0              |
|                            | 0                                                  | 3.924862078 | 29.96754972    | 1.308287359                    |             |                |
| 4.529985881                | 0.000166701                                        | 0.002520635 | AC108463.3     |                                |             | 2              |
|                            | 111210995                                          | 111212476   | -              | 1482                           | lincRNA     | novel          |
| transcript                 | -                                                  | 26          | 35             | 28                             | 0           | 4              |
|                            | 0.959444499                                        | 1.041247085 | 0.875210025    | 0                              | 0           | 0              |
|                            | 0.125996309                                        |             |                |                                |             |                |
| ENSG00000108963            | 922.0984555                                        | 1120.683929 | 892.729954     |                                |             |                |
| 1697.737195                | 1240.107854                                        | 1745.582409 | 978.5041129    |                                |             |                |
| 1561.142486                | -0.673363984                                       | 0.000166888 | 0.002520965    |                                |             | DPH1           |
|                            | 17                                                 | 2030110     | 2043430        | +                              | 5757        | protein_coding |
| diphthamide biosynthesis 1 | [Source:HGNC Symbol;Acc:HGNC:3003]                 |             |                |                                |             |                |
|                            | -                                                  |             |                |                                |             |                |
|                            | 797                                                | 1209        | 913            | 1690                           | 1357        | 1779           |
|                            | 9.258998833                                        | 7.346441149 | 14.19357156    | 10.27169738                    |             |                |
|                            | 14.42532991                                        |             |                |                                |             |                |

|                 |                                                                                                    |             |             |             |             |                |
|-----------------|----------------------------------------------------------------------------------------------------|-------------|-------------|-------------|-------------|----------------|
| ENSG00000182752 | 205.9391783                                                                                        | 119.5766972 | 68.44588913 |             |             |                |
| 317.4467182     | 358.2330719                                                                                        | 295.3458714 | 131.3205882 |             |             |                |
| 323.6752205     | -1.305939039                                                                                       | 0.000169009 | 0.00254898  | PAPPA       |             |                |
| 9               | 116153804                                                                                          | 116402322   | +           | 11573       |             |                |
| protein_coding  | pappalysin 1 [Source:HGNC Symbol;Acc:HGNC:8602] -                                                  |             |             |             |             |                |
| 178             | 129                                                                                                | 70          | 316         | 392         | 301         | 0.841140922    |
|                 | 0.491448162                                                                                        | 0.280191233 | 1.320207957 | 1.476041988 |             |                |
|                 | 1.214133881                                                                                        |             |             |             |             |                |
| ENSG00000132394 | 834.1693682                                                                                        | 907.4851669 | 766.5939583 |             |             |                |
| 1253.713621     | 1247.418733                                                                                        | 1239.275201 | 836.0828311 |             |             |                |
| 1246.802518     | -0.576352375                                                                                       | 0.000169076 | 0.00254898  | EEFSEC      |             |                |
| 3               | 128153454                                                                                          | 128408646   | +           | 2421        |             |                |
| protein_coding  | "eukaryotic elongation factor, selenocysteine-tRNA specific [Source:HGNC Symbol;Acc:HGNC:24614]" - |             |             |             |             |                |
| 784             | 1248                                                                                               | 1365        | 1263        | 16.28677843 | 17.82878962 | 979            |
|                 | 15.00112152                                                                                        | 24.92418765 | 24.56950799 | 24.35311934 |             |                |
| ENSG00000212907 | 12325.11273                                                                                        | 9612.483331 | 13897.44889 |             |             |                |
| 18226.06268     | 16392.81848                                                                                        | 17628.51802 | 11945.01498 |             |             |                |
| 17415.79973     | -0.544020567                                                                                       | 0.000172229 | 0.002593951 | MT-         |             |                |
| ND4L            | MT                                                                                                 | 10470       | 10766       | +           | 297         | protein_coding |
| mitochondrially | encoded NADH:ubiquinone oxidoreductase core subunit 4L [Source:HGNC Symbol;Acc:HGNC:7460] -        |             |             |             |             |                |
| 18143           | 17938                                                                                              | 17966       | 1961.598815 | 1539.416953 | 10653       | 10370 14213    |
| 2216.826797     | 2953.614883                                                                                        | 2631.941113 | 2823.845827 |             |             |                |
| ENSG00000149639 | 2173.930989                                                                                        | 1903.030692 | 3637.410108 |             |             |                |
| 1583.215278     | 1215.433637                                                                                        | 1612.137098 | 2571.457263 |             |             |                |
| 1470.262004     | 0.806726119                                                                                        | 0.000172923 | 0.002601844 | SOGA1       |             |                |
| 20              | 36777442                                                                                           | 36863686    | -           | 15128       |             |                |
| protein_coding  | "suppressor of glucose, autophagy associated 1 [Source:HGNC Symbol;Acc:HGNC:16111]" -              |             |             |             |             |                |
| 1576            | 1330                                                                                               | 1643        | 6.792661565 | 5.983308442 | 1879        | 2053 3720      |
| 11.39105319     | 5.037045963                                                                                        | 3.831146178 | 5.069931405 |             |             |                |
| ENSG00000145604 | 1167.374331                                                                                        | 1053.943447 | 1390.429348 |             |             |                |
| 789.5984825     | 679.9117488                                                                                        | 830.1083295 | 1203.915709 |             |             |                |
| 766.5395203     | 0.65152318                                                                                         | 0.000173095 | 0.002601879 | SKP2        |             |                |
| 5               | 36151989                                                                                           | 36184319    | +           | 3837        |             |                |
| protein_coding  | S-phase kinase associated protein 2 [Source:HGNC Symbol;Acc:HGNC:10901] -                          |             |             |             |             |                |
| 846             | 14.38116535                                                                                        | 13.06479572 | 17.16762637 | 1422        | 786         | 744            |
| 9.904486476     | 8.449669729                                                                                        | 10.29258826 |             |             |             |                |
| ENSG00000228624 | 3.470885027                                                                                        | 0.926951141 | 0           | 25.11445555 |             |                |
| 20.1049173      | 43.17348286                                                                                        | 1.465945389 | 29.46428524 |             |             |                |
| -4.395147731    | 0.000173499                                                                                        | 0.002605383 | HDAC2-AS2   |             |             |                |
| 6               | 113969701                                                                                          | 114471705   | +           | 8063        |             |                |
| antisense       | HDAC2 and HS3ST5 antisense RNA 2 [Source:HGNC Symbol;Acc:HGNC:43590] -                             |             |             |             |             |                |
| 44              | 0.020347887                                                                                        | 0.005468111 | 0           | 25          | 22          |                |
|                 | 0.118900757                                                                                        | 0.254742879 | 0           | 0.149914819 |             |                |
| ENSG00000110203 | 11.56961676                                                                                        | 24.10072966 | 2.933395248 |             |             |                |
| 43.19686355     | 102.3523063                                                                                        | 86.34696571 | 12.86791389 |             |             |                |

|                                                |                                |                        |                        |             |
|------------------------------------------------|--------------------------------|------------------------|------------------------|-------------|
| 77.29871184                                    | -2.581023547                   | 0.000173956            | 0.002608608            | FOLR3       |
| 11                                             | 72114869                       | 72139892               | + 1396                 |             |
| protein_coding                                 | folate receptor 3              | [Source:HGNC           | Symbol;Acc:HGNC:3795]  |             |
| -                                              | 10 26                          | 3 43                   | 112 88                 |             |
| 0.391750261                                    | 0.821148847                    | 0.099549319            | 1.489307079            |             |
| 3.496159215                                    | 2.942681708                    |                        |                        |             |
| ENSG00000128791                                | 1943.695615                    | 1395.061467            | 1422.696696            |             |
| 847.8640194                                    | 1145.980286                    | 958.6475625            | 1587.151259            |             |
| 984.1639561                                    | 0.688599251                    | 0.000174225            | 0.002608608            | TWSG1       |
| 18                                             | 9334767 9402420                | + 4435                 | protein_coding         |             |
| twisted gastrulation BMP signaling modulator 1 | [Source:HGNC                   | Symbol;Acc:HGNC:12429] | - 1680 1505            | 1455 844    |
| 977                                            | 20.71621312                    | 14.96155846            | 15.19748855            | 1254        |
| 9.201317971                                    | 12.32146961                    | 10.28364262            |                        |             |
| ENSG00000104907                                | 1538.759029                    | 1459.948047            | 1333.71704             |             |
| 2431.079297                                    | 1845.996952                    | 2177.317238            | 1444.141372            |             |
| 2151.464496                                    | -0.575156867                   | 0.000174226            | 0.002608608            | TRMT1       |
| 19                                             | 13104902                       | 13117567               | - 3364                 |             |
| protein_coding                                 | tRNA methyltransferase 1       | [Source:HGNC           | Symbol;Acc:HGNC:25980] | - 1330 1575 |
| 2219                                           | 21.62172635                    | 20.64232108            | 18.78282183            | 2020        |
| 34.78248411                                    | 26.16700275                    | 30.79267023            |                        |             |
| ENSG00000072274                                | 9126.113698                    | 9134.176542            | 11652.42373            |             |
| 7393.695714                                    | 6100.928542                    | 7189.366111            | 9970.904655            |             |
| 6894.663456                                    | 0.532325766                    | 0.000175569            | 0.002626143            | TFRC        |
| 3                                              | 196027183                      | 196082189              | - 7887                 |             |
| protein_coding                                 | transferrin receptor           | [Source:HGNC           | Symbol;Acc:HGNC:11763] | - 7888 9854 |
| 7327                                           | 54.69527042                    | 55.08516759            | 69.99347478            | 6676        |
| 45.1198025                                     | 36.88612935                    | 43.36710051            |                        |             |
| ENSG00000164054                                | 2787.120677                    | 3418.595807            | 3028.241695            |             |
| 4048.450235                                    | 4698.15363                     | 4374.258786            | 3077.98606             |             |
| 4373.620883                                    | -0.506631514                   | 0.000176141            | 0.002632131            | SHISA5      |
| 3                                              | 48467798                       | 48504826               | - 4664                 |             |
| protein_coding                                 | shisa family member 5          | [Source:HGNC           | Symbol;Acc:HGNC:30376] | - 2409 3688 |
| 4458                                           | 28.24704169                    | 34.86312625            | 30.75991418            | 5141        |
| 41.77800725                                    | 48.03387901                    | 44.61979372            |                        |             |
| ENSG00000136167                                | 3157.348413                    | 3904.318205            | 3069.309228            |             |
| 5011.84075                                     | 4848.94051                     | 4609.75051             | 3376.991949            |             |
| 4823.51059                                     | -0.5141357                     | 0.000177185            | 0.002640961            | LCP1        |
| 13                                             | 46125920                       | 46211871               | - 5061                 |             |
| protein_coding                                 | lymphocyte cytosolic protein 1 | [Source:HGNC           | Symbol;Acc:HGNC:6528]  | - 2729 4212 |
| 4698                                           | 29.48912668                    | 36.69323338            | 28.73144272            | 5306        |
| 47.66267174                                    | 45.68667017                    | 43.33339454            |                        |             |
| ENSG00000137834                                | 247.5897986                    | 292.9165605            | 534.8557336            |             |
| 164.7508284                                    | 116.9740643                    | 183.4873021            | 358.4540309            |             |
| 155.0707316                                    | 1.210428183                    | 0.000177186            | 0.002640961            | SMAD6       |
| 15                                             | 66702228                       | 66782848               | + 8563                 |             |

|                                              |                                                        |             |             |             |             |                |             |
|----------------------------------------------|--------------------------------------------------------|-------------|-------------|-------------|-------------|----------------|-------------|
| protein_coding                               | SMAD family member 6 [Source:HGNC                      |             |             |             |             |                |             |
| Symbol;Acc:HGNC:6772]                        | MH1                                                    | 214         | 316         | 547         | 164         | 128            |             |
|                                              | 187                                                    | 1.366729417 | 1.627028261 | 2.959128591 |             |                |             |
| 0.926017343                                  | 0.651392304                                            | 1.019440066 |             |             |             |                |             |
| ENSG00000157557                              | 2091.78671                                             | 1977.186783 | 2455.251823 |             |             |                |             |
| 1446.59264                                   | 1582.805308                                            | 1437.480736 | 2174.741772 |             |             |                |             |
| 1488.959561                                  | 0.546467962                                            | 0.000177563 | 0.002640961 |             |             | ETS2           |             |
|                                              | 21                                                     | 38805307    | 38824955    | +           | 4595        |                |             |
| protein_coding                               | "ETS proto-oncogene 2, transcription factor            |             |             |             |             |                |             |
| [Source:HGNC Symbol;Acc:HGNC:3489]"          | ETS                                                    | 1808        | 2133        | 2511        |             |                |             |
|                                              | 1440                                                   | 1732        | 1465        | 21.51828341 | 20.4662982  |                |             |
| 25.3141677                                   | 15.15228718                                            | 16.42558968 | 14.88326261 |             |             |                |             |
| ENSG00000148356                              | 358.6581195                                            | 345.7527755 | 395.0305601 |             |             |                |             |
| 738.3649932                                  | 607.7168185                                            | 528.875165  | 366.480485  |             |             |                |             |
| 624.9856589                                  | -0.769892107                                           | 0.000177584 | 0.002640961 |             |             | LRSAM1         |             |
|                                              | 9                                                      | 127451486   | 127503501   | +           | 4365        |                |             |
| protein_coding                               | leucine rich repeat and sterile alpha motif containing |             |             |             |             |                |             |
| 1 [Source:HGNC Symbol;Acc:HGNC:25135]        | -                                                      | 310         | 373         | 404         |             |                |             |
|                                              | 735                                                    | 665         | 539         | 3.883936837 | 3.767545811 |                |             |
| 4.287454981                                  | 8.141497756                                            | 6.638897982 | 5.764352794 |             |             |                |             |
| ENSG00000149948                              | 3274.201542                                            | 3685.557736 | 2612.677368 |             |             |                |             |
| 4659.233794                                  | 4831.577172                                            | 4536.159347 | 3190.812215 |             |             |                |             |
| 4675.656771                                  | -0.551229719                                           | 0.000177596 | 0.002640961 |             |             | HMGA2          |             |
|                                              | 12                                                     | 65824131    | 65966295    | +           | 15403       |                |             |
| protein_coding                               | high mobility group AT-hook 2 [Source:HGNC             |             |             |             |             |                |             |
| Symbol;Acc:HGNC:5009]                        | HMGI/HMGY                                              | 2830        | 3976        | 2672        | 4638        |                |             |
|                                              | 5287                                                   | 4623        | 10.04791223 | 11.38085836 | 8.035882801 |                |             |
|                                              | 14.55883571                                            | 14.95762334 | 14.0108542  |             |             |                |             |
| ENSG00000067704                              | 5576.555277                                            | 5110.281639 | 5307.489803 |             |             |                |             |
| 3946.987834                                  | 3970.721167                                            | 3877.763733 | 5331.44224  |             |             |                |             |
| 3931.824245                                  | 0.439225332                                            | 0.000178085 | 0.002645662 |             |             | IARS2          |             |
|                                              | 1                                                      | 220094102   | 220148041   | +           | 4165        |                |             |
| protein_coding                               | "isoleucyl-tRNA synthetase 2, mitochondrial            |             |             |             |             |                |             |
| [Source:HGNC Symbol;Acc:HGNC:29685]"         | -                                                      | 4820        | 5513        | 5428        |             |                |             |
|                                              | 3929                                                   | 4345        | 3952        | 63.2887831  | 58.35887949 |                |             |
| 60.37084978                                  | 45.61085775                                            | 45.46041257 | 44.29431257 |             |             |                |             |
| ENSG00000139117                              | 635.17196                                              | 507.042274  | 477.1656271 |             |             |                |             |
| 299.3643102                                  | 322.5925367                                            | 317.9138283 | 539.793287  |             |             |                |             |
| 313.2902251                                  | 0.783764057                                            | 0.000178278 | 0.002645958 |             |             | CPNE8          |             |
|                                              | 12                                                     | 38646822    | 38907430    | -           | 5178        |                |             |
| protein_coding                               | copine 8 [Source:HGNC Symbol;Acc:HGNC:23498]           |             |             |             |             |                |             |
|                                              | 549                                                    | 547         | 488         | 298         | 353         | 324            | 5.798357802 |
|                                              | 4.657568364                                            | 4.365763762 | 2.782629817 | 2.970785237 |             |                |             |
|                                              | 2.920982802                                            |             |             |             |             |                |             |
| ENSG00000125650                              | 99.49870411                                            | 168.7051076 | 141.7807703 |             |             |                |             |
| 359.6390035                                  | 259.5362052                                            | 265.9094058 | 136.6615274 |             |             |                |             |
| 295.0282048                                  | -1.106634348                                           | 0.000178893 | 0.002652505 |             |             | PSPN           |             |
|                                              | 19                                                     | 6375148     | 6379058     | -           | 3911        | protein_coding |             |
| persephin [Source:HGNC Symbol;Acc:HGNC:9579] |                                                        |             |             |             |             |                |             |
|                                              | 145                                                    | 358         | 284         | 271         | 1.202556107 | 2.051717345    |             |

|                                                   |                                                                                  |             |             |             |                |
|---------------------------------------------------|----------------------------------------------------------------------------------|-------------|-------------|-------------|----------------|
|                                                   | 1.717444225                                                                      | 4.425847313 | 3.164383577 | 3.234651604 |                |
| ENSG00000125170                                   | 137.6784394                                                                      | 214.1257135 | 162.3145371 |             |                |
| 255.1628684                                       | 409.4092251                                                                      | 418.9790268 | 171.3728967 |             |                |
| 361.1837068                                       | -1.073762283                                                                     | 0.000179202 | 0.002654511 |             | DOK4           |
| 16                                                | 57471922                                                                         | 57487327    | -           | 4788        |                |
| protein_coding                                    | docking protein 4 [Source:HGNC Symbol;Acc:HGNC:19868]                            |             |             |             |                |
| -                                                 | 119                                                                              | 231         | 166         | 254         | 448 427        |
| 1.35921304                                        | 2.127119045                                                                      | 1.606040165 | 2.564961149 |             |                |
| 4.077392033                                       | 4.16312805                                                                       |             |             |             |                |
| ENSG00000276043                                   | 4823.373226                                                                      | 6003.862539 | 5973.370524 |             |                |
| 3793.287366                                       | 3370.315228                                                                      | 4345.803536 | 5600.202097 |             |                |
| 3836.46871                                        | 0.545924702                                                                      | 0.000179874 | 0.002661885 |             | UHRF1          |
| 19                                                | 4903080                                                                          | 4962154 +   | 5145        |             | protein_coding |
| ubiquitin like with PHD and ring finger domains 1 | [Source:HGNC Symbol;Acc:HGNC:12556]                                              |             |             |             |                |
| -                                                 |                                                                                  | 4169        | 6477        | 6109        | 3776 3688      |
| 4429                                              | 44.3140281                                                                       | 55.50376912 | 55.00310438 |             |                |
| 35.48524622                                       | 31.23662695                                                                      | 40.18521877 |             |             |                |
| ENSG00000145241                                   | 715.0023156                                                                      | 633.1076292 | 701.0814644 |             |                |
| 427.9503226                                       | 461.4992381                                                                      | 331.6508456 | 683.0638031 |             |                |
| 407.0334688                                       | 0.746251763                                                                      | 0.000180337 | 0.002666163 |             | CENPC          |
| 4                                                 | 67468748                                                                         | 67545606    | -           | 8613        |                |
| protein_coding                                    | centromere protein C [Source:HGNC Symbol;Acc:HGNC:1854]                          |             |             |             |                |
| -                                                 |                                                                                  | 618         | 683         | 717         | 426 505        |
| 338                                               | 3.923997668                                                                      | 3.496231766 | 3.856267607 |             |                |
| 2.391422816                                       | 2.555027205                                                                      | 1.831927529 |             |             |                |
| ENSG00000111237                                   | 915.1566855                                                                      | 780.4928606 | 814.5060807 |             |                |
| 506.3074239                                       | 590.3534808                                                                      | 476.8707425 | 836.7185422 |             |                |
| 524.5105491                                       | 0.672905147                                                                      | 0.000181361 | 0.002678711 |             | VPS29          |
| 12                                                | 110491097                                                                        | 110502117   | -           | 3211        |                |
| protein_coding                                    | "VPS29, retromer complex component [Source:HGNC Symbol;Acc:HGNC:14340]"          |             |             |             |                |
| -                                                 |                                                                                  | 791         | 842         | 833         | 504 646        |
| 486                                               | 13.47196329                                                                      | 11.56127533 | 12.01730688 |             |                |
| 7.589120478                                       | 8.766996036                                                                      | 7.065485338 |             |             |                |
| ENSG00000169764                                   | 1588.508381                                                                      | 1279.192574 | 1269.182344 |             |                |
| 603.7515114                                       | 973.2607694                                                                      | 900.7558469 | 1378.9611   |             |                |
| 825.9227093                                       | 0.738740388                                                                      | 0.000182817 | 0.002697615 |             | UGP2           |
| 2                                                 | 63840940                                                                         | 63891562    | +           | 6501        |                |
| protein_coding                                    | UDP-glucose pyrophosphorylase 2 [Source:HGNC Symbol;Acc:HGNC:12527]              |             |             |             |                |
| -                                                 |                                                                                  | 1373        | 1380        | 1298        | 601 1065       |
| 918                                               | 11.55008244                                                                      | 9.359073939 | 9.249046912 |             |                |
| 4.469876484                                       | 7.138846429                                                                      | 6.591868741 |             |             |                |
| ENSG00000237765                                   | 542.6150259                                                                      | 433.8131339 | 381.3413823 |             |                |
| 292.3322626                                       | 228.4649694                                                                      | 188.3933797 | 452.5898474 |             |                |
| 236.3968706                                       | 0.936432197                                                                      | 0.000183008 | 0.002697821 |             |                |
| FAM200B                                           | 4                                                                                | 15681662    | 15705565    | +           | 4817           |
| protein_coding                                    | family with sequence similarity 200 member B [Source:HGNC Symbol;Acc:HGNC:27740] |             |             |             |                |
| -                                                 |                                                                                  |             |             | 469         | 468 390        |
| 291                                               | 250                                                                              | 192         | 5.324648077 | 4.283543334 |                |
| 3.750510766                                       | 2.920905854                                                                      | 2.261632103 | 1.86067541  |             |                |
| ENSG00000166886                                   | 497.4935206                                                                      | 853.7220007 | 687.3922866 |             |                |

|                                 |                                                  |                        |                |             |
|---------------------------------|--------------------------------------------------|------------------------|----------------|-------------|
| 1078.91701                      | 1131.358528                                      | 1227.500615            | 679.5359359    |             |
| 1145.925385                     | -0.752440648                                     | 0.000184428            | 0.002716132    | NAB2        |
| 12                              | 57088894                                         | 57095476               | + 3010         |             |
| protein_coding                  | NGFI-A binding protein 2 [Source:HGNC            |                        |                |             |
| Symbol;Acc:HGNC:7627]           | -                                                | 430 921                | 703 1074       | 1238        |
| 1251                            | 7.81261949                                       | 13.49047038            | 10.81910374    |             |
| 17.25198223                     | 17.92308427                                      | 19.40156888            |                |             |
| ENSG00000064666                 | 3092.558559                                      | 3832.942967            | 4559.474015    |             |
| 2202.035463                     | 2491.182026                                      | 2813.144894            | 3828.32518     |             |
| 2502.120794                     | 0.613760538                                      | 0.000184812            | 0.002719174    | CNN2        |
| 19                              | 1026581 1039068                                  | + 3645                 | protein_coding |             |
| calponin 2 [Source:HGNC         | Symbol;Acc:HGNC:2156]                            | -                      | 2673           | 4135        |
| 4663                            | 2192 2726                                        | 2867                   | 40.10478005    | 50.01634353 |
| 59.26118597                     | 29.07664095                                      | 32.59019182            | 36.71776146    |             |
| ENSG00000196141                 | 2567.297958                                      | 2362.798458            | 2705.568218    |             |
| 1826.323208                     | 1742.730786                                      | 1849.591254            | 2545.221545    |             |
| 1806.215083                     | 0.494798238                                      | 0.000185119            | 0.002721068    |             |
| SPATS2L 2                       | 200305881                                        | 200482263              | + 10437        |             |
| protein_coding                  | spermatogenesis associated serine rich 2 like    |                        |                |             |
| [Source:HGNC                    | Symbol;Acc:HGNC:24574]                           | -                      | 2219 2549      | 2767        |
| 1818                            | 1907 1885                                        | 11.62723182            | 10.76782801    |             |
| 12.28106221                     | 8.42208096                                       | 7.962209626            | 8.431050816    |             |
| ENSG00000205809                 | 139.9923628                                      | 104.7454789            | 122.224802     |             |
| 46.21059821                     | 40.20983461                                      | 45.1359139             | 122.3208812    |             |
| 43.85211557                     | 1.479354083                                      | 0.00018566             | 0.002726403    | KLRC2       |
| 12                              | 10426854                                         | 10442300               | - 1499         |             |
| protein_coding                  | killer cell lectin like receptor C2 [Source:HGNC |                        |                |             |
| Symbol;Acc:HGNC:6375]           | -                                                | 121 113                | 125 46         | 44          |
| 46                              | 4.414468785                                      | 3.323615446            | 3.86287661     |             |
| 1.483738669                     | 1.279115146                                      | 1.432525082            |                |             |
| ENSG00000172164                 | 369.0707746                                      | 339.2641176            | 411.6531332    |             |
| 204.9339573                     | 214.7570712                                      | 198.2055349            | 373.3293418    |             |
| 205.9655211                     | 0.857773378                                      | 0.000187089            | 0.002744745    | SNTB1       |
| 8                               | 120535745                                        | 120813273              | - 6868         |             |
| protein_coding                  | syntrophin beta 1 [Source:HGNC                   | Symbol;Acc:HGNC:11168] |                |             |
| -                               | 319 366                                          | 421 204                | 235 202        |             |
| 2.54012512                      | 2.349550354                                      | 2.839581023            | 1.436154282    |             |
| 1.491063618                     | 1.372989193                                      |                        |                |             |
| ENSG00000181649                 | 317.0074991                                      | 442.1556942            | 540.7225241    |             |
| 155.7096244                     | 161.7531983                                      | 286.5149317            | 433.2952392    |             |
| 201.3259181                     | 1.106987524                                      | 0.000188215            | 0.002758624    | PHLDA2      |
| 11                              | 2928273 2929455                                  | - 955                  | protein_coding |             |
| pleckstrin homology like domain | family A member 2 [Source:HGNC                   |                        |                |             |
| Symbol;Acc:HGNC:12385]          | -                                                | 274 477                | 553 155        | 177         |
| 292                             | 15.69068501                                      | 22.02160485            | 26.8240417     |             |
| 7.847467813                     | 8.076598473                                      | 14.27333687            |                |             |
| ENSG00000136231                 | 1406.865398                                      | 1342.225252            | 1433.452478    |             |
| 1004.578222                     | 965.9498904                                      | 885.0563986            | 1394.181043    |             |
| 951.8615037                     | 0.550525124                                      | 0.000190149            | 0.002784304    |             |
| IGF2BP3 7                       | 23310209                                         | 23470467               | - 8511         |             |



|                                                        |                                                     |             |                |       |  |  |       |
|--------------------------------------------------------|-----------------------------------------------------|-------------|----------------|-------|--|--|-------|
| protein_coding                                         | insulin like growth factor 2 mRNA binding protein 3 |             |                |       |  |  |       |
| [Source:HGNC Symbol;Acc:HGNC:28868]                    | -                                                   | 1216        | 1448           | 1466  |  |  |       |
| 1000                                                   | 1057 902                                            | 7.813537434 | 7.501047737    |       |  |  |       |
| 7.979135415                                            | 5.68094554                                          | 5.411940267 | 4.947342564    |       |  |  |       |
| ENSG00000102554                                        | 264.9442237                                         | 279.0122934 | 205.3376674    |       |  |  |       |
| 414.8908057                                            | 575.7317228                                         | 408.1856561 | 249.7647282    |       |  |  |       |
| 466.2693949                                            | -0.901269754                                        | 0.000190433 | 0.002785791    |       |  |  | KLF5  |
| 13                                                     | 73054976                                            | 73077542    | +              | 3893  |  |  |       |
| protein_coding                                         | Kruppel like factor 5 [Source:HGNC                  |             |                |       |  |  |       |
| Symbol;Acc:HGNC:6349]                                  | zf-C2H2                                             | 229 301     | 210 413        | 630   |  |  |       |
| 416                                                    | 3.216960967                                         | 3.408914038 | 2.498833657    |       |  |  |       |
| 5.129403507                                            | 7.052039618                                         | 4.988327548 |                |       |  |  |       |
| ENSG00000186111                                        | 1420.748938                                         | 1510.003408 | 1989.819777    |       |  |  |       |
| 2515.463868                                            | 2336.739707                                         | 2564.897368 | 1640.190708    |       |  |  |       |
| 2472.366981                                            | -0.591667047                                        | 0.000193705 | 0.002830939    |       |  |  |       |
| PIP5K1C 19                                             | 3630183 3700479 -                                   | 6963        | protein_coding |       |  |  |       |
| phosphatidylinositol-4-phosphate 5-kinase type 1 gamma | [Source:HGNC                                        |             |                |       |  |  |       |
| Symbol;Acc:HGNC:8996]                                  | -                                                   | 1228 1629   | 2035 2504      | 2557  |  |  |       |
| 2614                                                   | 9.644876797                                         | 10.31474859 | 13.53849766    |       |  |  |       |
| 17.38758019                                            | 16.00268773                                         | 17.5248869  |                |       |  |  |       |
| ENSG00000175040                                        | 1211.338874                                         | 1828.874601 | 1740.481181    |       |  |  |       |
| 2237.1957                                              | 3312.742056                                         | 2320.574704 | 1593.564885    |       |  |  |       |
| 2623.504153                                            | -0.718819365                                        | 0.000196875 | 0.002874522    |       |  |  | CHST2 |
| 3                                                      | 143119331                                           | 143124014   | +              | 4582  |  |  |       |
| protein_coding                                         | carbohydrate sulfotransferase 2 [Source:HGNC        |             |                |       |  |  |       |
| Symbol;Acc:HGNC:1970]                                  | -                                                   | 1047 1973   | 1780 2227      | 3625  |  |  |       |
| 2365                                                   | 12.49644004                                         | 18.98479703 | 17.99564318    |       |  |  |       |
| 23.4999181                                             | 34.47557544                                         | 24.09473177 |                |       |  |  |       |
| ENSG00000078269                                        | 2959.507966                                         | 2669.619286 | 3012.59692     |       |  |  |       |
| 2140.756191                                            | 2042.476826                                         | 2000.698444 | 2880.574724    |       |  |  |       |
| 2061.310487                                            | 0.4827044                                           | 0.000199754 | 0.002913775    |       |  |  | SYNJ2 |
| 6                                                      | 157981887                                           | 158099176   | +              | 12493 |  |  |       |
| protein_coding                                         | synaptojanin 2 [Source:HGNC Symbol;Acc:HGNC:11504]  |             |                |       |  |  |       |
| -                                                      | 2558 2880                                           | 3081 2131   | 2235 2039      |       |  |  |       |
| 11.19769187                                            | 10.16388414                                         | 11.42424252 | 8.24741648     |       |  |  |       |
| 7.795956106                                            | 7.618974528                                         |             |                |       |  |  |       |
| ENSG00000114315                                        | 281.1416872                                         | 230.8108341 | 436.0980936    |       |  |  |       |
| 137.6272164                                            | 162.6670582                                         | 140.3138193 | 316.0168716    |       |  |  |       |
| 146.8693646                                            | 1.105174556                                         | 0.000202338 | 0.002948662    |       |  |  | HES1  |
| 3                                                      | 194136145                                           | 194138732   | +              | 2062  |  |  |       |
| protein_coding                                         | hes family bHLH transcription factor 1 [Source:HGNC |             |                |       |  |  |       |
| Symbol;Acc:HGNC:5192]                                  | bHLH                                                | 243 249     | 446 137        | 178   |  |  |       |
| 143                                                    | 6.444842751                                         | 5.324080877 | 10.01956008    |       |  |  |       |
| 3.212425929                                            | 3.761750082                                         | 3.237378009 |                |       |  |  |       |
| ENSG00000049860                                        | 3038.18136                                          | 3063.57352  | 3010.641323    |       |  |  |       |
| 2237.1957                                              | 2095.480699                                         | 2277.401221 | 3037.465401    |       |  |  |       |
| 2203.359207                                            | 0.463239788                                         | 0.00020308  | 0.002956644    |       |  |  | HEXB  |
| 5                                                      | 74640023                                            | 74722647    | +              | 5067  |  |  |       |
| protein_coding                                         | hexosaminidase subunit beta [Source:HGNC            |             |                |       |  |  |       |
| Symbol;Acc:HGNC:4879]                                  | -                                                   | 2626 3305   | 3079 2227      | 2293  |  |  |       |

|                 |                                                                             |                                                                                         |             |             |
|-----------------|-----------------------------------------------------------------------------|-----------------------------------------------------------------------------------------|-------------|-------------|
| 2321            | 28.34252447                                                                 | 28.75772441                                                                             | 28.14888783 |             |
| 21.25056734     | 19.72021966                                                                 | 21.38308055                                                                             |             |             |
| ENSG00000122862 | 809.873173                                                                  | 905.6312646                                                                             | 765.6161599 |             |
| 447.0373088     | 591.2673407                                                                 | 498.4574839                                                                             | 827.0401992 |             |
| 512.2540445     | 0.690803124                                                                 | 0.00020426                                                                              | 0.002971008 | SRGN        |
| 10              | 69088106                                                                    | 69104811                                                                                | + 1220      |             |
| protein_coding  | serglycin [Source:HGNC Symbol;Acc:HGNC:9361]                                |                                                                                         |             | -           |
| 700             | 977                                                                         | 783                                                                                     | 445         | 647         |
| 35.3076401      | 29.73064883                                                                 | 17.63605306                                                                             | 508         | 31.37855369 |
| 19.43792569     |                                                                             |                                                                                         |             | 23.11016508 |
| ENSG00000196154 | 5971.079208                                                                 | 6671.267361                                                                             | 8162.661178 |             |
| 2656.104819     | 4357.283896                                                                 | 5308.37596                                                                              | 6935.002582 |             |
| 4107.254892     | 0.755726667                                                                 | 0.000205461                                                                             | 0.002985636 | S100A4      |
| 1               | 153543613                                                                   | 153550136                                                                               | - 1025      |             |
| protein_coding  | S100 calcium binding protein A4 [Source:HGNC Symbol;Acc:HGNC:10494]         |                                                                                         |             | -           |
| 5410            | 275.3624432                                                                 | 309.5719446                                                                             | 377.2776088 | 4768        |
| 124.7207753     | 202.7080422                                                                 | 246.3879338                                                                             |             |             |
| ENSG00000143153 | 573.8529912                                                                 | 467.183375                                                                              | 534.8557336 |             |
| 319.4558746     | 332.6449954                                                                 | 262.9657592                                                                             | 525.2973666 |             |
| 305.0222097     | 0.783334518                                                                 | 0.000207305                                                                             | 0.003009558 | ATP1B1      |
| 1               | 169105697                                                                   | 169132722                                                                               | + 2962      |             |
| protein_coding  | ATPase Na+/K+ transporting subunit beta 1 [Source:HGNC Symbol;Acc:HGNC:804] |                                                                                         |             | -           |
| 268             | 9.157803805                                                                 | 7.502041119                                                                             | 8.554698894 | 364         |
| 5.190907408     | 5.355190532                                                                 | 4.223726376                                                                             |             |             |
| ENSG00000177363 | 91.39997238                                                                 | 229.8838829                                                                             | 141.7807703 |             |
| 349.5932213     | 320.764817                                                                  | 377.767975                                                                              | 154.3548752 |             |
| 349.3753377     | -1.174334929                                                                | 0.000208663                                                                             | 0.003025025 |             |
| LRRN4CL 11      | 62686402                                                                    | 62689899                                                                                | - 2585      |             |
| protein_coding  | LRRN4 C-terminal like [Source:HGNC Symbol;Acc:HGNC:33724]                   |                                                                                         |             | -           |
| 385             | 1.671326336                                                                 | 4.229851215                                                                             | 2.598423352 | 351         |
| 6.509084552     | 5.917049014                                                                 | 6.952583572                                                                             |             |             |
| ENSG00000138071 | 9038.184611                                                                 | 8074.671388                                                                             | 8452.089509 |             |
| 6421.263995     | 6271.820339                                                                 | 6326.87767                                                                              | 8521.648503 |             |
| 6339.987334     | 0.426580489                                                                 | 0.000208766                                                                             | 0.003025025 | ACTR2       |
| 2               | 65227753                                                                    | 65271253                                                                                | + 4347      |             |
| protein_coding  | ARP2 actin related protein 2 homolog [Source:HGNC Symbol;Acc:HGNC:169]      |                                                                                         |             | -           |
| 6448            | 98.28048866                                                                 | 88.35117538                                                                             | 92.1144098  | 6863        |
| 71.09651984     | 68.79913159                                                                 | 69.24388468                                                                             |             |             |
| ENSG00000230838 | 24.29619519                                                                 | 4.634755704                                                                             | 21.51156516 | 0           |
| 0               | 0                                                                           | 16.81417202                                                                             | 0           | 6.561924333 |
| 0.000208773     | 1                                                                           | LINC01614                                                                               | 2           | 215718043   |
| 215719424       | + 648                                                                       | lincRNA long intergenic non-protein coding RNA 1614 [Source:HGNC Symbol;Acc:HGNC:51847] |             | - 21        |
| 5               | 22                                                                          | 0                                                                                       | 0           | 1.772307199 |
| 0.340195807     | 1.572715369                                                                 | 0                                                                                       | 0           |             |
| ENSG00000187498 | 2942.153541                                                                 | 1999.433611                                                                             | 6012.482461 |             |

|                         |                                               |                             |                   |        |
|-------------------------|-----------------------------------------------|-----------------------------|-------------------|--------|
| 1202.480132             | 706.4136852                                   | 927.2486659                 | 3651.356538       |        |
| 945.3808276             | 1.94953022                                    | 0.0002099                   | 0.003038586       | COL4A1 |
| 13                      | 110148963                                     | 110307233                   | - 14738           |        |
| protein_coding          | collagen type IV alpha 1 chain                | [Source:HGNC                |                   |        |
| Symbol;Acc:HGNC:2202]   | -                                             | 2543 2157                   | 6149 1197         | 773    |
| 945                     | 9.436316973                                   | 6.45276057                  | 19.32717578       |        |
| 3.926963048             | 2.28559638                                    | 2.993224506                 |                   |        |
| ENSG00000128272         | 5141.537687                                   | 5577.465014                 | 4738.411125       |        |
| 6847.205161             | 7245.994968                                   | 7025.503119                 | 5152.471275       |        |
| 7039.56775              | -0.450199109                                  | 0.000211175                 | 0.003054149       | ATF4   |
| 22                      | 39519695                                      | 39522685                    | + 2514            |        |
| protein_coding          | activating transcription factor 4             | [Source:HGNC                |                   |        |
| Symbol;Acc:HGNC:786]    | TF_bZIP                                       | 4444 6017                   | 4846 6816         | 7929   |
| 7160                    | 96.67262017                                   | 105.5233806                 | 89.2936534        |        |
| 131.088781              | 137.4395556                                   | 132.9516663                 |                   |        |
| ENSG00000185269         | 87.92908735                                   | 49.12841046                 | 159.3811418       |        |
| 11.05036044             | 14.62175804                                   | 37.28618974                 | 98.81287988       |        |
| 20.98610274             | 2.235927122                                   | 0.000212247                 | 0.003063951       | NOTUM  |
| 17                      | 81952507                                      | 81961840                    | - 3019            |        |
| protein_coding          | "notum, palmitoleoyl-protein carboxylesterase | [Source:HGNC                |                   |        |
| Symbol;Acc:HGNC:27106]" | -                                             | 76 53                       |                   | 163    |
| 11                      | 16 38                                         | 1.376718638                 | 0.774010255       |        |
| 2.501076336             | 0.176169527                                   | 0.230948671                 | 0.587579343       |        |
| ENSG00000140199         | 945.2376891                                   | 932.5128477                 | 771.4829504       |        |
| 1324.034097             | 1373.531396                                   | 1268.711667                 | 883.077829        |        |
| 1322.092386             | -0.582555985                                  | 0.000212254                 | 0.003063951       |        |
| SLC12A6 15              | 34229996                                      | 34338060                    | - 10056           |        |
| protein_coding          | solute carrier family 12 member 6             | [Source:HGNC                |                   |        |
| Symbol;Acc:HGNC:10914]  | -                                             | 817 1006                    | 789 1318          | 1503   |
| 1293                    | 4.443155416                                   | 4.410691412                 | 3.634579681       |        |
| 6.337111698             | 6.513168498                                   | 6.002322086                 |                   |        |
| ENSG00000075618         | 9558.817365                                   | 10424.49253                 | 8588.003489       |        |
| 11647.07991             | 13787.40397                                   | 15368.77868                 | 9523.771128       |        |
| 13601.08752             | -0.514113093                                  | 0.000212751                 | 0.003068237       | FSCN1  |
| 7                       | 5592823 5606655                               | + 3692                      | protein_coding    | fascin |
| actin-bundling          | protein 1                                     | [Source:HGNC                |                   |        |
| Symbol;Acc:HGNC:11148]  | -                                             | 8262 11246 8783 11594 15087 | 15663 122.3821873 |        |
| 8262                    | 11246 8783                                    | 11594 15087                 | 15663 122.3821873 |        |
| 134.2982473             | 110.2005206                                   | 151.8353239                 | 178.0737054       |        |
| 198.0429065             |                                               |                             |                   |        |
| ENSG00000185090         | 350.5593877                                   | 636.8154338                 | 402.8529475       |        |
| 805.6717341             | 825.2154693                                   | 852.6762864                 | 463.4092563       |        |
| 827.8544966             | -0.835354451                                  | 0.000213098                 | 0.003070334       | MANEAL |
| 1                       | 37793802                                      | 37801137                    | + 3018            |        |
| protein_coding          | mannosidase endo-alpha like                   | [Source:HGNC                |                   |        |
| Symbol;Acc:HGNC:26452]  | -                                             | 303 687                     | 412 802           | 903    |
| 869                     | 5.490578509                                   | 10.03624974                 | 6.323833638       |        |
| 12.84861599             | 13.03848443                                   | 13.44146411                 |                   |        |
| ENSG00000103047         | 667.5668869                                   | 803.6666391                 | 674.6809072       |        |
| 1080.926167             | 1105.770452                                   | 1067.562485                 | 715.3048111       |        |
| 1084.753035             | -0.600132571                                  | 0.0002144                   | 0.003086196       | TANG06 |

|                                      |                                                     |             |              |             |                |
|--------------------------------------|-----------------------------------------------------|-------------|--------------|-------------|----------------|
| 16                                   | 68843604                                            | 69085180    | +            | 6839        |                |
| protein_coding                       | transport and golgi organization                    | 6 homolog   |              |             |                |
| [Source:HGNC Symbol;Acc:HGNC:25749]  |                                                     | -           | 577          | 867         | 690            |
| 1076                                 | 1210                                                | 1088        | 4.614003527  | 5.589339011 |                |
| 4.673679669                          | 7.607130806                                         | 7.709946498 | 7.426468229  |             |                |
| ENSG00000111843                      | 3183.958532                                         | 2915.261338 | 3323.536817  |             |                |
| 1984.041988                          | 2291.960573                                         | 2366.691833 | 3140.918895  |             |                |
| 2214.231465                          | 0.504233113                                         | 0.000218308 | 0.003139482  |             |                |
| TMEM14C                              | 6                                                   | 10722915    | 10731129     | +           | 1321           |
| protein_coding                       | transmembrane protein 14C                           |             | [Source:HGNC |             |                |
| Symbol;Acc:HGNC:20952]               | -                                                   | 2752        | 3145         | 3399        | 1975           |
| 2412                                 | 113.9305843                                         | 104.9667595 | 119.1930143  |             | 2508           |
| 72.28788175                          | 82.7338648                                          | 85.23550168 |              |             |                |
| ENSG00000149016                      | 503.2783289                                         | 674.8204305 | 532.9001368  |             |                |
| 922.2028078                          | 961.380591                                          | 848.7514243 | 570.3329654  |             |                |
| 910.7782744                          | -0.674323808                                        | 0.000218889 | 0.003144878  |             | TUT1           |
| 11                                   | 62575045                                            | 62592177    | -            | 4082        |                |
| protein_coding                       | "terminal uridylyl transferase 1, U6 snRNA-specific |             |              |             |                |
| [Source:HGNC Symbol;Acc:HGNC:26184]" | -                                                   |             | 435          | 728         | 545            |
| 918                                  | 1052                                                | 865         | 5.827884946  | 7.86307353  |                |
| 6.184804236                          | 10.87353852                                         | 11.23055805 | 9.892114689  |             |                |
| ENSG00000107984                      | 122.6379376                                         | 136.2618177 | 229.7826278  |             |                |
| 66.30216265                          | 53.91773277                                         | 63.77900877 | 162.8941277  |             |                |
| 61.33296806                          | 1.410964417                                         | 0.000221246 | 0.003175295  |             | DKK1           |
| 10                                   | 52314296                                            | 52318042    | +            | 2206        |                |
| protein_coding                       | dickkopf WNT signaling pathway inhibitor 1          |             |              |             |                |
| [Source:HGNC Symbol;Acc:HGNC:2891]   | -                                                   |             | 106          | 147         | 235            |
| 66                                   | 59                                                  | 65          | 2.62781671   | 2.937959364 |                |
| 4.934746071                          | 1.446570632                                         | 1.165480741 | 1.375478747  |             |                |
| ENSG00000168569                      | 764.7516676                                         | 904.7043135 | 771.4829504  |             |                |
| 1081.930745                          | 1483.194581                                         | 1249.087356 | 813.6463105  |             |                |
| 1271.404227                          | -0.643767438                                        | 0.000221421 | 0.003175295  |             |                |
| TMEM223                              | 11                                                  | 62771629    | 62792021     | -           | 2280           |
| protein_coding                       | transmembrane protein 223                           |             | [Source:HGNC |             |                |
| Symbol;Acc:HGNC:28464]               | -                                                   | 661         | 976          | 789         | 1077           |
| 1273                                 | 15.85482034                                         | 18.87334717 | 16.03040933  |             | 1623           |
| 22.83926233                          | 31.02003408                                         | 26.06391151 |              |             |                |
| ENSG00000155755                      | 1198.612296                                         | 1036.331375 | 966.0648352  |             |                |
| 603.7515114                          | 721.9493032                                         | 731.9867775 | 1067.002836  |             |                |
| 685.895864                           | 0.636798091                                         | 0.000222057 | 0.003181431  |             |                |
| TMEM237                              | 2                                                   | 201620184   | 201643570    | -           | 7647           |
| protein_coding                       | transmembrane protein 237                           |             | [Source:HGNC |             |                |
| Symbol;Acc:HGNC:14432]               | -                                                   | 1036        | 1118         | 988         | 601            |
| 746                                  | 7.409064541                                         | 6.44591644  | 5.985057267  |             | 790            |
| 3.800008765                          | 4.501887094                                         | 4.554007831 |              |             |                |
| ENSG00000177602                      | 380.6403913                                         | 386.5386257 | 461.5208524  |             |                |
| 195.8927533                          | 239.4312879                                         | 246.2850954 | 409.5666232  |             |                |
| 227.2030455                          | 0.850050178                                         | 0.000222326 | 0.003182298  |             | HASPIN         |
| 17                                   | 3723903                                             | 3726699     | +            | 2797        | protein_coding |
| histone H3 associated protein kinase |                                                     |             | [Source:HGNC |             |                |

|                                     |                                                        |             |             |             |                |             |
|-------------------------------------|--------------------------------------------------------|-------------|-------------|-------------|----------------|-------------|
| Symbol;Acc:HGNC:19682]              | -                                                      | 329         | 417         | 472         | 195            | 262         |
| 251                                 | 6.432771786                                            | 6.573210595 | 7.817213765 |             |                |             |
| 3.370880537                         | 4.081947575                                            | 4.189163308 |             |             |                |             |
| ENSG0000014641                      | 2230.622111                                            | 2405.43821  | 2381.916942 |             |                |             |
| 1593.26106                          | 1782.026761                                            | 1606.249805 | 2339.325754 |             |                |             |
| 1660.512542                         | 0.49448882                                             | 0.000222684 | 0.003184438 |             |                | MDH1        |
| 2                                   | 63588609                                               | 63607197    | +           | 4990        |                |             |
| protein_coding                      | malate dehydrogenase 1 [Source:HGNC                    |             |             |             |                |             |
| Symbol;Acc:HGNC:6970]               | -                                                      | 1928        | 2595        | 2436        | 1586           | 1950        |
| 1637                                | 21.13008269                                            | 22.92824293 | 22.61409406 |             |                |             |
| 15.36752237                         | 17.02913794                                            | 15.31419489 |             |             |                |             |
| ENSG00000267519                     | 485.9239038                                            | 586.7600722 | 552.4561051 |             |                |             |
| 926.2211207                         | 717.3800038                                            | 1014.576847 | 541.7133604 |             |                |             |
| 886.0593239                         | -0.708842355                                           | 0.00022331  | 0.003190416 |             |                |             |
| AC020916.1                          | 19                                                     | 13823880    | 13842928    | -           |                | 19049       |
| antisense                           | novel transcript                                       |             | -           | 420         |                | 633         |
| 565                                 | 922                                                    | 785         | 1034        | 1.205790399 | 1.465093988    |             |
| 1.373974656                         | 2.340237616                                            | 1.795792166 | 2.533928713 |             |                |             |
| ENSG00000160285                     | 2473.584063                                            | 3265.648869 | 4432.36022  |             |                |             |
| 2090.52728                          | 1899.000825                                            | 2296.044316 | 3390.531051 |             |                |             |
| 2095.190807                         | 0.694744632                                            | 0.000223602 | 0.003191598 |             |                | LSS         |
| 21                                  | 46188141                                               | 46228824    | -           | 7238        |                |             |
| protein_coding                      | lanosterol synthase [Source:HGNC Symbol;Acc:HGNC:6708] |             |             |             |                |             |
| -                                   | 2138                                                   | 3523        | 4533        | 2081        | 2078           | 2340        |
| 16.15413972                         | 21.45991623                                            | 29.01146073 | 13.90127766 |             |                |             |
| 12.51081385                         | 15.091879                                              |             |             |             |                |             |
| ENSG00000205903                     | 1529.503335                                            | 2556.531246 | 2677.212063 |             |                |             |
| 3858.584951                         | 3193.940272                                            | 3989.622302 | 2254.415548 |             |                |             |
| 3680.715842                         | -0.706666051                                           | 0.000224171 | 0.003196743 |             |                | ZNF316      |
| 7                                   | 6637322                                                | 6656432     | +           | 5811        | protein_coding | zinc        |
| finger protein 316                  | [Source:HGNC Symbol;Acc:HGNC:13843]                    |             |             |             |                |             |
| -                                   |                                                        |             |             |             |                | 1322        |
| 2758                                | 2738                                                   | 3841        | 3495        | 4066        | 12.44157301    |             |
| 20.92557229                         | 21.82654646                                            | 31.95910792 | 26.20926865 |             |                |             |
| 32.66348614                         |                                                        |             |             |             |                |             |
| ENSG00000152767                     | 1003.085773                                            | 755.4651798 | 999.3099813 |             |                |             |
| 552.5180221                         | 580.3010222                                            | 599.5226824 | 919.286978  |             |                |             |
| 577.4472422                         | 0.670214334                                            | 0.000224593 | 0.003199765 |             |                | FARP1       |
| 13                                  | 98142562                                               | 98455176    | +           | 36228       |                |             |
| protein_coding                      | "FERM, ARH/RhoGEF and pleckstrin domain protein 1      |             |             |             |                |             |
| [Source:HGNC Symbol;Acc:HGNC:3591]" | -                                                      |             | 867         | 815         |                | 1022        |
| 550                                 | 635                                                    | 611         | 1.308788442 | 0.991852763 |                |             |
| 1.306799599                         | 0.734039696                                            | 0.763814615 | 0.787304778 |             |                |             |
| ENSG00000132031                     | 82.14427898                                            | 41.71280134 | 63.55689705 |             |                |             |
| 10.04578222                         | 17.36333767                                            | 1.962431039 | 62.47132579 |             |                |             |
| 9.790516977                         | 2.665972544                                            | 0.00022496  | 0.003202016 |             |                | MATN3       |
| 2                                   | 19992111                                               | 20012694    | -           | 3118        |                |             |
| protein_coding                      | matrilin 3 [Source:HGNC Symbol;Acc:HGNC:6909]          |             |             |             |                |             |
| -                                   |                                                        |             |             |             |                |             |
| 71                                  | 45                                                     | 65          | 10          | 19          | 2              | 1.245308495 |
| 0.636312362                         | 0.965694375                                            | 0.155069043 | 0.265543752 |             |                |             |
| 0.029943318                         |                                                        |             |             |             |                |             |

|                        |                                                       |             |                          |             |             |
|------------------------|-------------------------------------------------------|-------------|--------------------------|-------------|-------------|
| ENSG00000151693        | 610.8757648                                           | 449.5713033 | 589.6124449              |             |             |
| 317.4467182            | 281.4688422                                           | 350.2939405 | 550.0198377              |             |             |
| 316.403167             | 0.797285082                                           | 0.000227466 | 0.003234671              | ASAP2       |             |
| 2                      | 9206765                                               | 9405683     | +                        | 7257        |             |
| protein_coding         | "ArfGAP with SH3 domain, ankyrin repeat and PH domain |             |                          |             |             |
| 2 [Source:HGNC         | Symbol;Acc:HGNC:2721]"                                | -           | 528                      | 485         | 603         |
| 316                    | 308                                                   | 357         | 3.978977764              | 2.946582285 |             |
| 3.849130582            | 2.105383311                                           | 1.849490867 | 2.296450713              |             |             |
| ENSG00000225697        | 643.2706917                                           | 647.0118963 | 878.0629777              |             |             |
| 467.1288732            | 356.4053522                                           | 449.3967079 | 722.7818552              |             |             |
| 424.3103111            | 0.769214127                                           | 0.000231231 | 0.003285154              |             |             |
| SLC26A6                | 3                                                     | 48625723    | 48635493                 | -           | 6373        |
| protein_coding         | solute carrier family 26 member 6 [Source:HGNC        |             |                          |             |             |
| Symbol;Acc:HGNC:14472] | -                                                     | 556         | 698                      | 898         | 465         |
| 458                    | 4.771177633                                           | 4.828869426 | 6.527319543              |             | 390         |
| 3.527851135            | 2.666731472                                           | 3.354807424 |                          |             |             |
| ENSG00000051825        | 613.1896881                                           | 461.6216681 | 840.9066379              |             |             |
| 370.6893639            | 307.0569188                                           | 363.0497422 | 638.5726647              |             |             |
| 346.9320083            | 0.880376648                                           | 0.000233093 | 0.00330853               |             |             |
| MPHOSPH9               | 12                                                    | 123152320   | 123244014                | -           | 10304       |
| protein_coding         | M-phase phosphoprotein 9 [Source:HGNC                 |             |                          |             |             |
| Symbol;Acc:HGNC:7215]  | -                                                     | 530         | 498                      | 860         | 369         |
| 370                    | 2.812967615                                           | 2.130872432 | 3.866295616              |             | 336         |
| 1.731496957            | 1.420993283                                           | 1.676262039 |                          |             |             |
| ENSG00000109472        | 894.3313753                                           | 680.3821374 | 796.9057092              |             |             |
| 424.9365879            | 408.4953652                                           | 574.0110789 | 790.5397406              |             |             |
| 469.1476773            | 0.75239073                                            | 0.000236477 | 0.003353449              | CPE         |             |
| 4                      | 165361194                                             | 165498320   | +                        | 2958        |             |
| protein_coding         | carboxypeptidase E [Source:HGNC Symbol;Acc:HGNC:2303] |             |                          |             |             |
| -                      | 773                                                   | 734         | 815                      | 423         | 447         |
| 14.29144154            | 10.94036593                                           | 12.76326819 | 6.914223505              |             |             |
| 6.58518456             | 9.23216871                                            |             |                          |             |             |
| ENSG00000196586        | 1291.16923                                            | 1256.945747 | 1155.757728              |             |             |
| 906.1295563            | 827.9570489                                           | 718.2497603 | 1234.624235              |             |             |
| 817.4454552            | 0.594777635                                           | 0.000236988 | 0.003357586              | MY06        |             |
| 6                      | 75749192                                              | 75919537    | +                        | 8785        |             |
| protein_coding         | myosin VI [Source:HGNC Symbol;Acc:HGNC:7605]          |             |                          |             |             |
| 1116                   | 1356                                                  | 1182        | 902                      | 906         | 732         |
| 6.805372185            | 6.232727886                                           | 4.964391098 | 4.494123777              |             |             |
| 3.889693231            |                                                       |             |                          |             |             |
| ENSG00000273319        | 13.88354011                                           | 12.97731597 | 19.55596832              | 0           |             |
| 0                      | 0                                                     | 15.4722748  | 0                        | 6.444776214 |             |
| 0.000238037            | 1                                                     | AC058791.1  | 7                        | 130936464   |             |
| 130939661              | +                                                     | 3198        | lincRNA novel transcript | -           |             |
| 12                     | 14                                                    | 20          | 0                        | 0           | 0.205209518 |
| 0.193011655            | 0.289703667                                           | 0           | 0                        | 0           |             |
| ENSG00000054654        | 988.0452711                                           | 793.4701766 | 1434.430277              |             |             |
| 588.6828381            | 541.9189073                                           | 703.5315275 | 1071.981908              |             |             |
| 611.3777576            | 0.810304956                                           | 0.000239722 | 0.003393177              | SYNE2       |             |
| 14                     | 63852983                                              | 64226433    | +                        | 31374       |             |

|                                      |                                                       |             |             |             |      |      |             |
|--------------------------------------|-------------------------------------------------------|-------------|-------------|-------------|------|------|-------------|
| protein_coding                       | spectrin repeat containing nuclear envelope protein 2 |             |             |             |      |      |             |
| [Source:HGNC Symbol;Acc:HGNC:17084]  | -                                                     | 854         | 856         | 1467        |      |      |             |
| 586                                  | 593                                                   | 717         | 1.48861603  | 1.202923005 |      |      |             |
| 2.166021073                          | 0.903085648                                           | 0.82365132  | 1.066830195 |             |      |      |             |
| ENSG00000104228                      | 1008.870581                                           | 1192.059167 | 935.7530843 |             |      |      |             |
| 1464.675048                          | 1572.752849                                           | 1629.798978 | 1045.560944 |             |      |      |             |
| 1555.742292                          | -0.573015031                                          | 0.000240405 | 0.003399691 | TRIM35      |      |      |             |
| 8                                    | 27284887                                              | 27311319    | -           | 4269        |      |      |             |
| protein_coding                       | tripartite motif containing 35                        |             |             |             |      |      |             |
| [Source:HGNC Symbol;Acc:HGNC:16285]  | -                                                     | 872         | 1286        | 957         | 1458 | 1721 |             |
| 1661                                 | 11.17081972                                           | 13.28155031 | 10.38456332 |             |      |      |             |
| 16.51325113                          | 17.56763555                                           | 18.16308074 |             |             |      |      |             |
| ENSG00000148300                      | 923.2554172                                           | 1348.71391  | 1264.293352 |             |      |      |             |
| 1877.556697                          | 1729.022888                                           | 1828.004513 | 1178.754226 |             |      |      |             |
| 1811.528033                          | -0.618984043                                          | 0.00024121  | 0.003407934 | REX04       |      |      |             |
| 9                                    | 133406059                                             | 133418096   | -           | 2654        |      |      |             |
| protein_coding                       | "REX4 homolog, 3'-5' exonuclease                      |             |             |             |      |      |             |
| [Source:HGNC Symbol;Acc:HGNC:12820]" | -                                                     | 798         | 1455        | 1293        | 1869 | 1892 |             |
| 1863                                 | 16.44359174                                           | 24.17107872 | 22.56836318 |             |      |      |             |
| 34.04941066                          | 31.06553314                                           | 32.76860642 |             |             |      |      |             |
| ENSG00000118473                      | 37.02277362                                           | 27.80853423 | 42.04533189 |             |      |      |             |
| 3.013734666                          | 6.397019142                                           | 1.962431039 | 35.62554658 |             |      |      |             |
| 3.791061616                          | 3.221964246                                           | 0.000243496 | 0.003437055 | SGIP1       |      |      |             |
| 1                                    | 66533383                                              | 66748299    | +           | 10477       |      |      |             |
| protein_coding                       | SH3 domain GRB2 like endophilin interacting protein 1 |             |             |             |      |      |             |
| [Source:HGNC Symbol;Acc:HGNC:25412]  | -                                                     | 32          | 30          | 43          |      |      |             |
| 3                                    | 7                                                     | 2           | 0.167035102 | 0.126246187 |      |      |             |
| 0.190122697                          | 0.013844763                                           | 0.029115194 | 0.008911259 |             |      |      |             |
| ENSG00000129911                      | 705.7466222                                           | 1341.298301 | 1297.538498 |             |      |      |             |
| 1732.897433                          | 1971.195756                                           | 2019.341539 | 1114.86114  |             |      |      |             |
| 1907.811576                          | -0.774076093                                          | 0.000243974 | 0.003440615 | KLF16       |      |      |             |
| 19                                   | 1852399                                               | 1863568     | -           | 2955        |      |      |             |
| Kruppel like factor 16               | [Source:HGNC Symbol;Acc:HGNC:16857]                   |             |             |             |      |      | zf-         |
| C2H2                                 | 610                                                   | 1447        | 1327        | 1725        | 2157 | 2058 | 11.28930126 |
|                                      | 21.58962027                                           | 20.80251738 | 28.22492722 | 31.80909093 |      |      |             |
|                                      | 32.51126897                                           |             |             |             |      |      |             |
| ENSG00000173692                      | 4125.725336                                           | 3424.157514 | 4293.512845 |             |      |      |             |
| 3085.05972                           | 2537.78888                                            | 2555.085213 | 3947.798565 |             |      |      |             |
| 2725.977937                          | 0.534244767                                           | 0.000244283 | 0.003441804 | PSMD1       |      |      |             |
| 2                                    | 231056864                                             | 231172827   | +           | 5187        |      |      |             |
| protein_coding                       | "proteasome 26S subunit, non-ATPase 1                 |             |             |             |      |      |             |
| [Source:HGNC Symbol;Acc:HGNC:9554]"  | -                                                     | 3566        | 3694        | 4391        | 3071 | 2777 |             |
| 2604                                 | 37.59757234                                           | 31.3989121  | 39.21476754 |             |      |      |             |
| 28.62627143                          | 23.33018752                                           | 23.43531351 |             |             |      |      |             |
| ENSG00000047410                      | 6370.230986                                           | 6174.421549 | 6933.568569 |             |      |      |             |
| 4867.181486                          | 4208.324735                                           | 5012.048873 | 6492.740368 |             |      |      |             |
| 4695.851698                          | 0.467514642                                           | 0.000244803 | 0.003445953 | TPR         |      |      |             |
| 1                                    | 186311652                                             | 186375693   | -           | 12350       |      |      |             |
| protein_coding                       | "translocated promoter region, nuclear basket protein |             |             |             |      |      |             |
| [Source:HGNC Symbol;Acc:HGNC:12017]" | -                                                     | 5506        | 6661        | 7091        |      |      |             |

|                        |                                                        |          |             |             |        |
|------------------------|--------------------------------------------------------|----------|-------------|-------------|--------|
| 4845                   | 4605                                                   | 5108     | 24.38169882 | 23.77970343 |        |
| 26.59763265            | 18.96828386                                            |          | 16.24879931 | 19.30767442 |        |
| ENSG00000142546        | 2238.720843                                            |          | 2998.686941 | 2909.928086 |        |
| 3930.914583            | 3590.555458                                            |          | 4562.652166 | 2715.778623 |        |
| 4028.040736            | -0.568292036                                           |          | 0.000246957 | 0.003473071 | NOSIP  |
| 19                     | 49555711                                               |          | 49590262    | -           | 4248   |
| protein_coding         | nitric oxide synthase interacting protein [Source:HGNC |          |             |             |        |
| Symbol;Acc:HGNC:17946] | -                                                      |          | 1935        | 3235        | 2976   |
| 4650                   | 24.91100071                                            |          | 33.57559634 | 32.45270295 | 3913   |
| 44.53757394            | 40.30473949                                            |          | 51.09924468 |             | 3929   |
| ENSG00000119669        | 1181.257871                                            |          | 1748.229852 | 1527.321126 |        |
| 2684.233009            | 2498.492905                                            |          | 1893.745953 | 1485.60295  |        |
| 2358.823956            | -0.666410613                                           |          | 0.000249085 | 0.003499779 |        |
| IRF2BPL                | 14                                                     | 77024543 | 77028699    | -           | 4157   |
| protein_coding         | interferon regulatory factor 2 binding protein like    |          |             |             |        |
| [Source:HGNC           | Symbol;Acc:HGNC:14282]                                 |          | -           | 1021        | 1886   |
| 2672                   | 2734                                                   | 1930     | 13.43199218 | 20.00302243 | 1562   |
| 17.40617962            | 31.07832799                                            |          | 28.66005922 | 21.67321406 |        |
| ENSG00000182580        | 76.3594706                                             |          | 56.54401959 | 199.4708769 |        |
| 30.13734666            | 27.41579632                                            |          | 27.47403455 | 110.7914557 |        |
| 28.34239251            | 1.967769201                                            |          | 0.000249406 | 0.00350107  | EPHB3  |
| 3                      | 184561784                                              |          | 184582409   | +           | 4532   |
| protein_coding         | EPH receptor B3 [Source:HGNC                           |          |             |             |        |
| Symbol;Acc:HGNC:3394]  | -                                                      |          | 66          | 61          | 204    |
| 0.796432084            | 0.593436004                                            |          | 2.085176021 | 0.320060862 | 30     |
| 0.288462891            | 0.288412558                                            |          |             |             | 28     |
| ENSG00000131844        | 1793.290597                                            |          | 1666.658151 | 2018.175931 |        |
| 1311.979158            | 1265.69593                                             |          | 1210.819951 | 1826.04156  |        |
| 1262.83168             | 0.532053938                                            |          | 0.000250509 | 0.003512343 | MCCC2  |
| 5                      | 71587288                                               |          | 71658704    | +           | 6034   |
| protein_coding         | methylcrotonoyl-CoA carboxylase 2 [Source:HGNC         |          |             |             |        |
| Symbol;Acc:HGNC:6937]  | -                                                      |          | 1550        | 1798        | 2064   |
| 1234                   | 14.0482137                                             |          | 13.13766972 | 15.84553266 | 1306   |
| 10.4649965             | 10.00237345                                            |          | 9.54675747  |             | 1385   |
| ENSG00000172340        | 1896.260186                                            |          | 2028.169096 | 2073.910441 |        |
| 1234.626635            | 1537.112314                                            |          | 1370.758081 | 1999.446574 |        |
| 1380.832343            | 0.533991424                                            |          | 0.000250668 | 0.003512343 | SUCLG2 |
| 3                      | 67360460                                               |          | 67654614    | -           | 3090   |
| protein_coding         | succinate-CoA ligase GDP-forming beta subunit          |          |             |             |        |
| [Source:HGNC           | Symbol;Acc:HGNC:11450]                                 |          | -           | 1639        | 2188   |
| 1229                   | 1682                                                   | 1397     | 29.00782635 | 31.21927377 | 2121   |
| 31.79689003            | 19.23067906                                            |          | 23.72062402 | 21.10493226 |        |
| ENSG00000130830        | 1077.13132                                             |          | 1196.693923 | 1305.360886 |        |
| 703.2047554            | 864.511444                                             |          | 783.9912001 | 1193.062043 |        |
| 783.9024665            | 0.605995962                                            |          | 0.000250983 | 0.003513535 | MPP1   |
| X                      | 154778684                                              |          | 154821007   | -           | 5396   |
| protein_coding         | membrane palmitoylated protein 1 [Source:HGNC          |          |             |             |        |
| Symbol;Acc:HGNC:7219]  | -                                                      |          | 931         | 1291        | 1335   |
| 799                    | 9.43566368                                             |          | 10.54844054 | 11.46071679 | 700    |
| 6.272307125            | 7.639726182                                            |          | 6.912272871 |             | 946    |



|                       |                                              |             |             |        |
|-----------------------|----------------------------------------------|-------------|-------------|--------|
| ENSG00000129038       | 2173.930989                                  | 2411.926868 | 3068.33143  |        |
| 1659.563223           | 1623.015142                                  | 1831.929375 | 2551.396429 |        |
| 1704.835913           | 0.581939858                                  | 0.000254622 | 0.003561217 | LOXL1  |
| 15                    | 73925989                                     | 73952137    | + 3637      |        |
| protein_coding        | lysyl oxidase like 1 [Source:HGNC            |             |             |        |
| Symbol;Acc:HGNC:6665] | -                                            | 1879 2602   | 3138 1652   | 1776   |
| 1867                  | 28.25388621                                  | 31.54263345 | 39.9679703  |        |
| 21.96180132           | 21.27934511                                  | 23.96332361 |             |        |
| ENSG00000100985       | 167.759443                                   | 282.720098  | 939.6642779 |        |
| 66.30216265           | 68.53949081                                  | 83.40331915 | 463.381273  |        |
| 72.7483242            | 2.671499408                                  | 0.00025611  | 0.003578745 | MMP9   |
| 20                    | 46008908                                     | 46016561    | + 2336      |        |
| protein_coding        | matrix metalloproteinase 9 [Source:HGNC      |             |             |        |
| Symbol;Acc:HGNC:7176] | -                                            | 145 305     | 961 66      | 75     |
| 85                    | 3.394609924                                  | 5.756532473 | 19.05693291 |        |
| 1.366067986           | 1.399094414                                  | 1.698603924 |             |        |
| ENSG00000131876       | 866.5642951                                  | 825.9134665 | 928.9084954 |        |
| 598.7286203           | 564.7654042                                  | 557.3304151 | 873.795419  |        |
| 573.6081465           | 0.607278179                                  | 0.000258167 | 0.003602266 | SNRPA1 |
| 15                    | 101281510                                    | 101295282   | - 3669      |        |
| protein_coding        | small nuclear ribonucleoprotein polypeptide  |             |             |        |
| A' [Source:HGNC       | Symbol;Acc:HGNC:11152]                       | -           | 749 891     | 950    |
| 596                   | 618 568                                      | 11.16423112 | 10.70690502 |        |
| 11.99439507           | 7.854160367                                  | 7.340055793 | 7.226810382 |        |
| ENSG00000180182       | 1874.277915                                  | 1682.416321 | 1805.993675 |        |
| 1330.061566           | 1148.721866                                  | 1253.012218 | 1787.562637 |        |
| 1243.931883           | 0.523048378                                  | 0.000258264 | 0.003602266 | MED14  |
| X                     | 40648306                                     | 40735858    | - 9656      |        |
| protein_coding        | mediator complex subunit 14 [Source:HGNC     |             |             |        |
| Symbol;Acc:HGNC:2370] | -                                            | 1620 1815   | 1847 1324   | 1257   |
| 1277                  | 9.175135151                                  | 8.287305146 | 8.860782863 |        |
| 6.629670505           | 5.672788845                                  | 6.173616899 |             |        |
| ENSG00000184678       | 87.92908735                                  | 86.2064561  | 93.86864795 |        |
| 258.1766031           | 251.3114663                                  | 132.4640951 | 89.33473047 |        |
| 213.9840548           | -1.260341702                                 | 0.00025948  | 0.003615929 |        |
| HIST2H2BE             | 1 149884459                                  | 149886652   | -           | 2194   |
| protein_coding        | histone cluster 2 H2B family member e        |             |             |        |
| [Source:HGNC          | Symbol;Acc:HGNC:4760]                        | -           | 76 93       | 96     |
| 257                   | 275 135                                      | 1.894399986 | 1.868875124 |        |
| 2.026922136           | 5.663667076                                  | 5.462037385 | 2.872388512 |        |
| ENSG00000131174       | 1565.369147                                  | 1699.101441 | 1925.285081 |        |
| 1012.614848           | 1262.040491                                  | 1205.913873 | 1729.918557 |        |
| 1160.189737           | 0.576390067                                  | 0.000259724 | 0.003616026 | COX7B  |
| X                     | 77899438                                     | 77907373    | + 3024      |        |
| protein_coding        | cytochrome c oxidase subunit 7B [Source:HGNC |             |             |        |
| Symbol;Acc:HGNC:2291] | -                                            | 1353 1833   | 1969 1008   | 1381   |
| 1229                  | 24.46869021                                  | 26.7248106  | 30.16243403 |        |
| 16.1168425            | 19.90079791                                  | 18.97213175 |             |        |
| ENSG00000144645       | 238.3341052                                  | 222.4682738 | 278.6725486 |        |
| 118.5402302           | 101.4384464                                  | 138.3513882 | 246.4916425 |        |

|                                                               |                                                |             |             |             |                |
|---------------------------------------------------------------|------------------------------------------------|-------------|-------------|-------------|----------------|
| 119.4433549                                                   | 1.045903589                                    | 0.000260046 | 0.003617213 |             |                |
| OSBPL10 3                                                     | 31657890                                       | 32077580    | -           | 11976       |                |
| protein_coding                                                | oxysterol binding protein like 10 [Source:HGNC |             |             |             |                |
| Symbol;Acc:HGNC:16395]                                        | -                                              | 206         | 240         | 285         | 118            |
| 141                                                           | 0.940697838                                    | 0.883554641 | 1.102390669 |             | 111            |
| 0.476399653                                                   | 0.40389622                                     | 0.549608399 |             |             |                |
| ENSG0000010165                                                | 2514.077721                                    | 2473.105644 | 2411.250894 |             |                |
| 3459.767397                                                   | 3312.742056                                    | 3300.809007 | 2466.144753 |             |                |
| 3357.77282                                                    | -0.445285698                                   | 0.000260837 | 0.003622482 |             |                |
| METTL13 1                                                     | 171781664                                      | 171814023   | +           | 3827        |                |
| protein_coding                                                | methyltransferase like 13 [Source:HGNC         |             |             |             |                |
| Symbol;Acc:HGNC:24248]                                        | -                                              | 2173        | 2668        | 2466        | 3444           |
| 3364                                                          | 31.05245756                                    | 30.73698895 | 29.84950035 |             | 3625           |
| 43.51168453                                                   | 41.277002                                      | 41.03397228 |             |             |                |
| ENSG00000119705                                               | 1349.017314                                    | 1062.286007 | 1128.379372 |             |                |
| 701.195599                                                    | 805.110552                                     | 807.5403725 | 1179.894231 |             |                |
| 771.2821745                                                   | 0.612549341                                    | 0.000260898 | 0.003622482 |             | SLIRP          |
| 14                                                            | 77708071                                       | 77761104    | +           | 2631        |                |
| protein_coding                                                | SRA stem-loop interacting RNA binding protein  |             |             |             |                |
| [Source:HGNC Symbol;Acc:HGNC:20495]                           | -                                              |             | 1166        | 1146        | 1154           |
| 698                                                           | 881                                            | 823         | 24.23664017 | 19.20426665 |                |
| 20.31830225                                                   | 12.82731592                                    | 14.59196093 | 14.6024263  |             |                |
| ENSG00000066044                                               | 3955.651969                                    | 3935.834544 | 4275.912474 |             |                |
| 2825.878539                                                   | 3002.029697                                    | 3084.941593 | 4055.799662 |             |                |
| 2970.949943                                                   | 0.449066413                                    | 0.000262679 | 0.003643896 |             | ELAVL1         |
| 19                                                            | 7958579                                        | 8005659     | -           | 6956        | protein_coding |
| like RNA binding protein 1 [Source:HGNC Symbol;Acc:HGNC:3312] |                                                |             |             |             | ELAV           |
| 3419                                                          | 4246                                           | 4373        | 2813        | 3285        | 3144           |
| 26.91252055                                                   | 29.12207794                                    | 19.55290883 | 20.57948007 |             |                |
| 21.09934628                                                   |                                                |             |             |             |                |
| ENSG00000177839                                               | 17.35442514                                    | 16.68512054 | 23.46716199 |             |                |
| 89.40746176                                                   | 86.81668835                                    | 51.02320701 | 19.16890255 |             |                |
| 75.74911904                                                   | -1.98159224                                    | 0.000264151 | 0.003660989 |             | PCDHB9         |
| 5                                                             | 141187127                                      | 141191541   | +           | 4415        |                |
| protein_coding                                                | protocadherin beta 9 [Source:HGNC              |             |             |             |                |
| Symbol;Acc:HGNC:8694]                                         | -                                              | 15          | 18          | 24          | 89             |
| 52                                                            | 0.185804088                                    | 0.179752838 | 0.251815808 |             | 95             |
| 0.974676545                                                   | 0.937673182                                    | 0.549817643 |             |             |                |
| ENSG00000074410                                               | 3551.872344                                    | 4428.972551 | 2451.340629 |             |                |
| 4377.951892                                                   | 6705.90378                                     | 6269.967169 | 3477.395175 |             |                |
| 5784.607614                                                   | -0.734211379                                   | 0.000268183 | 0.003713506 |             | CA12           |
| 15                                                            | 63321378                                       | 63382161    | -           | 7313        |                |
| protein_coding                                                | carbonic anhydrase 12 [Source:HGNC             |             |             |             |                |
| Symbol;Acc:HGNC:1371]                                         | -                                              | 3070        | 4778        | 2507        | 4358           |
| 6390                                                          | 22.95818308                                    | 28.80610437 | 15.88039192 |             | 7338           |
| 28.81329124                                                   | 43.7260988                                     | 40.78977602 |             |             |                |
| ENSG00000172172                                               | 1202.083181                                    | 1233.771968 | 975.8428193 |             |                |
| 556.536335                                                    | 700.0166661                                    | 841.8829157 | 1137.232656 |             |                |
| 699.4786389                                                   | 0.700958861                                    | 0.000269345 | 0.003726228 |             | MRPL13         |
| 8                                                             | 120380761                                      | 120445402   | -           | 4209        |                |

|                                     |                                                       |             |             |             |                |        |
|-------------------------------------|-------------------------------------------------------|-------------|-------------|-------------|----------------|--------|
| protein_coding                      | mitochondrial ribosomal protein L13 [Source:HGNC      |             |             |             |                |        |
| Symbol;Acc:HGNC:14278]              | -                                                     | 1039        | 1331        | 998         | 554            | 766    |
| 858                                 | 13.49992434                                           | 13.94225712 |             | 10.9838368  |                |        |
| 6.364027615                         | 7.930643752                                           | 9.515999224 |             |             |                |        |
| ENSG00000100353                     | 6392.213258                                           | 6558.179321 |             | 5618.429699 |                |        |
| 8276.719971                         | 8685.324275                                           | 8212.773898 |             | 6189.607426 |                |        |
| 8391.606048                         | -0.439134689                                          | 0.000270392 |             | 0.00373733  |                | EIF3D  |
| 22                                  | 36510850                                              | 36529436    |             | -           | 4070           |        |
| protein_coding                      | eukaryotic translation initiation factor 3 subunit D  |             |             |             |                |        |
| [Source:HGNC Symbol;Acc:HGNC:3278]  | -                                                     |             |             | 5525        | 7075           | 5746   |
| 8239                                | 9504                                                  | 8370        | 74.23908078 | 76.64185241 |                |        |
| 65.39938559                         | 97.8771489                                            |             | 101.7584812 | 96.00129349 |                |        |
| ENSG00000196550                     | 203.6252549                                           |             | 101.0376744 | 206.3154658 |                |        |
| 62.28384977                         | 40.20983461                                           |             | 78.49724156 | 170.3261317 |                |        |
| 60.33030864                         | 1.497464192                                           |             | 0.000271152 | 0.003744438 |                | FAM72A |
| 1                                   | 206186179                                             |             | 206204414   | -           | 3783           |        |
| protein_coding                      | family with sequence similarity 72 member A           |             |             |             |                |        |
| [Source:HGNC Symbol;Acc:HGNC:24044] | -                                                     |             |             | 176         | 109            | 211    |
| 62                                  | 44                                                    | 80          | 2.544315943 | 1.270352114 |                |        |
| 2.583738578                         | 0.792422074                                           |             | 0.506844727 | 0.987187577 |                |        |
| ENSG00000261221                     | 754.3390126                                           |             | 1146.638561 | 1360.117597 |                |        |
| 1892.62537                          | 1538.026174                                           |             | 2034.059772 | 1087.031724 |                |        |
| 1821.570439                         | -0.74384921                                           |             | 0.000271571 | 0.003746848 |                | ZNF865 |
| 19                                  | 55605405                                              |             | 55617269    | +           | 4005           |        |
| protein_coding                      | zinc finger protein 865 [Source:HGNC                  |             |             |             |                |        |
| Symbol;Acc:HGNC:38705]              | zf-C2H2                                               | 652         | 1237        | 1391        | 1884           | 1683   |
| 2073                                | 8.903070001                                           |             | 13.61761768 | 16.08892641 |                |        |
| 22.74466761                         | 18.3121861                                            |             | 24.16255288 |             |                |        |
| ENSG00000174945                     | 128.422746                                            |             | 160.3625474 | 222.9380389 |                |        |
| 83.37999243                         | 52.09001301                                           |             | 17.66187935 | 170.5744441 |                |        |
| 51.0439616                          | 1.74205015                                            |             | 0.000272075 | 0.003747685 |                | AMZ1   |
| 7                                   | 2679522                                               | 2775500     | +           | 7011        | protein_coding |        |
| archaelysin                         | family metallopeptidase 1 [Source:HGNC                |             |             |             |                |        |
| Symbol;Acc:HGNC:22231]              | -                                                     | 111         | 173         | 228         | 83             | 57     |
| 18                                  | 0.865840157                                           |             | 1.087927849 | 1.506459067 |                |        |
| 0.572399627                         | 0.354285588                                           |             | 0.119850148 |             |                |        |
| ENSG00000189308                     | 903.5870687                                           |             | 748.0495707 | 841.8844363 |                |        |
| 462.1059821                         | 602.2336592                                           |             | 492.5701908 | 831.1736919 |                |        |
| 518.969944                          | 0.678526018                                           |             | 0.000272122 | 0.003747685 |                | LIN54  |
| 4                                   | 82909973                                              |             | 83012926    | -           | 6768           |        |
| protein_coding                      | lin-54 DREAM MuvB core complex component [Source:HGNC |             |             |             |                |        |
| Symbol;Acc:HGNC:25397]              | -                                                     | 781         | 807         | 861         | 460            | 659    |
| 502                                 | 6.310814237                                           |             | 5.257110948 | 5.893119628 |                |        |
| 3.286235616                         | 4.24310386                                            |             | 3.462496977 |             |                |        |
| ENSG00000132196                     | 426.9188583                                           |             | 365.2187495 | 533.8779352 |                |        |
| 270.2315417                         | 166.3224977                                           |             | 251.191173  | 442.005181  |                |        |
| 229.2484041                         | 0.948043561                                           |             | 0.000274154 | 0.003772267 |                |        |
| HSD17B7                             | 1                                                     | 162790702   | 162812817   | +           | 4778           |        |
| protein_coding                      | hydroxysteroid 17-beta dehydrogenase 7 [Source:HGNC   |             |             |             |                |        |
| Symbol;Acc:HGNC:5215]               | -                                                     | 369         | 394         | 546         | 269            | 182    |

|                                      |                                                 |                                        |             |             |
|--------------------------------------|-------------------------------------------------|----------------------------------------|-------------|-------------|
| 256                                  | 4.22352368                                      | 3.635666465                            | 5.293573568 |             |
| 2.722120531                          | 1.659907321                                     | 2.501150677                            |             |             |
| ENSG00000186960                      | 1080.602205                                     | 883.3844372                            | 809.6170886 |             |
| 569.5958519                          | 547.4020666                                     | 635.8276566                            | 924.534577  |             |
| 584.2751917                          | 0.661488924                                     | 0.000275283                            | 0.003784394 |             |
| LINC01551                            | 14                                              | 28772704                               | 28813453    | +           |
|                                      | lincRNA                                         | long intergenic non-protein coding RNA | 1551        | 2772        |
| [Source:HGNC Symbol;Acc:HGNC:19828]  |                                                 | -                                      | 934         | 953         |
| 567                                  | 599                                             | 648                                    | 18.42673385 | 15.15771136 |
| 13.83692435                          | 9.889880623                                     | 9.416558184                            | 10.91258943 |             |
| ENSG00000108828                      | 5217.897157                                     | 6202.230083                            | 5907.85803  |             |
| 6772.866373                          | 8806.867639                                     | 9857.291109                            | 5775.99509  |             |
| 8479.008373                          | -0.553746322                                    | 0.000276277                            | 0.003794652 | VAT1        |
| 17                                   | 43014605                                        | 43025123                               | -           | 3501        |
| protein_coding                       | vesicle amine transport 1                       | [Source:HGNC                           |             |             |
| Symbol;Acc:HGNC:16919]               | -                                               | 4510                                   | 6691        | 6042        |
| 10046                                | 70.44969932                                     | 84.26221614                            | 79.94495566 | 6742        |
| 93.11032744                          | 119.9522354                                     | 133.9513512                            |             | 9637        |
| ENSG00000156113                      | 404.9365865                                     | 416.2010622                            | 282.5837423 |             |
| 145.6638422                          | 168.1502174                                     | 235.4917247                            | 367.9071303 |             |
| 183.1019281                          | 1.006458024                                     | 0.000277412                            | 0.003806824 | KCNMA1      |
| 10                                   | 76869601                                        | 77638369                               | -           | 35644       |
| protein_coding                       | potassium calcium-activated channel subfamily M | alpha                                  |             |             |
| 1 [Source:HGNC Symbol;Acc:HGNC:6284] | -                                               | 350                                    | 449         | 289         |
| 145                                  | 184                                             | 240                                    | 0.537002518 | 0.555384639 |
| 0.375589864                          | 0.196690228                                     | 0.224952066                            | 0.314319151 |             |
| ENSG00000182179                      | 411.8783566                                     | 399.5159417                            | 645.3469547 |             |
| 130.5951689                          | 233.9481286                                     | 308.1016731                            | 485.5804176 |             |
| 224.2149902                          | 1.114701415                                     | 0.000277835                            | 0.003809202 | UBA7        |
| 3                                    | 49805207                                        | 49813946                               | -           | 4545        |
| protein_coding                       | ubiquitin like modifier activating enzyme 7     |                                        |             |             |
| [Source:HGNC Symbol;Acc:HGNC:12471]  | -                                               | 356                                    | 431         | 660         |
| 130                                  | 256                                             | 314                                    | 4.283618871 | 4.180972784 |
| 6.726861775                          | 1.382963383                                     | 2.454509263                            | 3.225089686 |             |
| ENSG00000144659                      | 1327.035042                                     | 1454.38634                             | 1235.937198 |             |
| 1964.955002                          | 2043.390686                                     | 1776.00009                             | 1339.119527 |             |
| 1928.115259                          | -0.525824503                                    | 0.000278257                            | 0.003811568 |             |
| SLC25A38                             | 3                                               | 39383324                               | 39397351    | +           |
|                                      | protein_coding                                  | solute carrier family 25 member 38     |             | 2708        |
| [Source:HGNC Symbol;Acc:HGNC:26054]  | -                                               | 1147                                   | 1569        | 1264        |
| 1956                                 | 2236                                            | 1810                                   | 23.16378209 | 25.54513732 |
| 21.62224927                          | 34.92379312                                     | 35.98170486                            | 31.20153431 |             |
| ENSG00000101940                      | 758.9668593                                     | 669.2587237                            | 689.3478834 |             |
| 963.3905149                          | 1107.598171                                     | 1118.585692                            | 705.8578221 |             |
| 1063.19146                           | -0.591636699                                    | 0.000280144                            | 0.003833148 | WDR13       |
| X                                    | 48590042                                        | 48608867                               | +           | 7884        |
| protein_coding                       | WD repeat domain 13                             | [Source:HGNC                           |             |             |
| Symbol;Acc:HGNC:14352]               | -                                               | 656                                    | 722         | 705         |
| 1140                                 | 4.550424746                                     | 4.037611605                            | 4.142332509 | 959         |
| 5.881298309                          | 6.699071328                                     | 6.750007752                            |             | 1212        |

|                                      |                                                     |                                     |             |             |      |
|--------------------------------------|-----------------------------------------------------|-------------------------------------|-------------|-------------|------|
| ENSG00000100413                      | 1170.845216                                         | 1162.396731                         | 1271.137941 |             |      |
| 1868.515493                          | 1599.254785                                         | 1717.127159                         | 1201.459962 |             |      |
| 1728.299146                          | -0.524358878                                        | 0.000280334                         | 0.003833148 | POLR3H      |      |
| 22                                   | 41525804                                            | 41544606                            | -           | 6594        |      |
| protein_coding                       | RNA polymerase III subunit H [Source:HGNC           |                                     |             |             |      |
| Symbol;Acc:HGNC:30349]               | -                                                   | 1012                                | 1254        | 1300        | 1860 |
| 1750                                 | 8.393175079                                         | 8.384603917                         | 9.132651078 |             | 1750 |
| 13.63845634                          | 11.56505503                                         | 12.3889683                          |             |             |      |
| ENSG00000183527                      | 1707.675433                                         | 1778.819239                         | 1668.124098 |             |      |
| 1108.049779                          | 1271.179089                                         | 1227.500615                         | 1718.206257 |             |      |
| 1202.243161                          | 0.515074763                                         | 0.000281951                         | 0.003851823 | PSMG1       |      |
| 21                                   | 39174769                                            | 39183851                            | -           | 2515        |      |
| protein_coding                       | proteasome assembly chaperone 1 [Source:HGNC        |                                     |             |             |      |
| Symbol;Acc:HGNC:3043]                | -                                                   | 1476                                | 1919        | 1706        | 1103 |
| 1251                                 | 32.0954213                                          | 33.64115851                         | 31.42269957 |             | 1391 |
| 21.20502259                          | 24.10170344                                         | 23.22016792                         |             |             |      |
| ENSG00000206417                      | 33.5518886                                          | 14.83121825                         | 36.1785414  | 0           |      |
| 1.827719755                          | 2.943646558                                         | 28.18721608                         | 1.590455438 |             |      |
| 4.137893924                          | 0.000282676                                         | 0.003858276                         | H1FX-AS1    |             |      |
| 3                                    | 129315392                                           | 129326225                           | +           | 3420        |      |
| antisense                            | H1FX antisense RNA 1 [Source:HGNC                   |                                     |             |             |      |
| Symbol;Acc:HGNC:27953]               | -                                                   | 29                                  | 16          | 37          | 0    |
| 3                                    | 0.463731508                                         | 0.206266089                         | 0.501161931 |             | 2    |
|                                      | 0.0254837                                           | 0.0409488                           |             |             | 0    |
| ENSG00000164171                      | 1929.812075                                         | 1485.902679                         | 1341.539427 |             |      |
| 2732.452764                          | 2316.634789                                         | 2206.753703                         | 1585.751394 |             |      |
| 2418.613752                          | -0.60957904                                         | 0.000283713                         | 0.003868976 | ITGA2       |      |
| 5                                    | 52989326                                            | 53094779                            | +           | 7910        |      |
| protein_coding                       | integrin subunit alpha 2 [Source:HGNC               |                                     |             |             |      |
| Symbol;Acc:HGNC:6137]                | -                                                   | 1668                                | 1603        | 1372        | 2720 |
| 2249                                 | 11.53225603                                         | 8.934926758                         | 8.034892741 |             | 2535 |
| 16.62622437                          | 13.9656154                                          | 13.27269173                         |             |             |      |
| ENSG00000213442                      | 1800.232367                                         | 1916.934959                         | 1976.130599 |             |      |
| 2566.697357                          | 2471.077109                                         | 3203.668671                         | 1897.765975 |             |      |
| 2747.147712                          | -0.533416793                                        | 0.00028832                          | 0.003928297 |             |      |
| RPL18AP3                             | 12                                                  | 104265309                           | 104265836   | +           | 528  |
|                                      | processed_pseudogene                                | ribosomal protein L18a pseudogene 3 |             |             |      |
| [Source:HGNC Symbol;Acc:HGNC:31387]  | -                                                   |                                     | 1556        | 2068        | 2021 |
| 2555                                 | 2704                                                | 3265                                | 161.1648702 | 172.6833916 |      |
| 177.3106602                          | 233.9689351                                         | 223.1677128                         | 288.6657771 |             |      |
| ENSG00000076201                      | 2352.103087                                         | 2642.737703                         | 2973.484984 |             |      |
| 4171.008778                          | 3270.704501                                         | 4206.470932                         | 2656.108591 |             |      |
| 3882.72807                           | -0.547441761                                        | 0.000290372                         | 0.003952731 | PTPN23      |      |
| 3                                    | 47381011                                            | 47413441                            | +           | 5981        |      |
| protein_coding                       | "protein tyrosine phosphatase, non-receptor type 23 |                                     |             |             |      |
| [Source:HGNC Symbol;Acc:HGNC:14406]" | -                                                   |                                     | 2033        | 2851        | 3041 |
| 4152                                 | 3579                                                | 4287                                | 18.5890968  | 21.01635389 |      |
| 23.55293717                          | 33.56485373                                         | 26.07633152                         | 33.45998307 |             |      |
| ENSG00000131018                      | 1768.994402                                         | 1808.481676                         | 1196.825261 |             |      |
| 2578.752296                          | 2135.690534                                         | 2781.745998                         | 1591.43378  |             |      |

|                                |                                    |                            |                    |        |
|--------------------------------|------------------------------------|----------------------------|--------------------|--------|
| 2498.729609                    | -0.650947825                       | 0.000291467                | 0.003964102        | SYNE1  |
| 6                              | 152121684                          | 152637801                  | - 46064            |        |
| protein_coding                 | spectrin repeat                    | containing nuclear         | envelope protein 1 |        |
| [Source:HGNC                   | Symbol;Acc:HGNC:17089]             | -                          | 1529 1951          | 1224   |
| 2567                           | 2337 2835                          | 1.815267159                | 1.867366571        |        |
| 1.230898454                    | 2.694420894                        | 2.210831596                | 2.873012077        |        |
| ENSG00000206053                | 2466.642293                        | 2241.367859                | 2630.277739        |        |
| 1678.650209                    | 1799.390099                        | 1747.54484                 | 2446.095964        |        |
| 1741.861716                    | 0.489700249                        | 0.000294658                | 0.004003944        | JPT2   |
| 16                             | 1678256 1702280 +                  | 4768                       | protein_coding     |        |
| Jupiter microtubule associated | homolog 2 [Source:HGNC             |                            |                    |        |
| Symbol;Acc:HGNC:14137]         | -                                  | 2132 2418                  | 2690 1671          | 1969   |
| 1781                           | 24.45376117                        | 22.35908401                | 26.13475836        |        |
| 16.94499401                    | 17.99567193                        | 17.43707793                |                    |        |
| ENSG00000106976                | 1243.733801                        | 1265.288307                | 1936.040864        |        |
| 948.3218416                    | 808.7659915                        | 973.3657953                | 1481.687658        |        |
| 910.1512095                    | 0.703481386                        | 0.000297102                | 0.004033562        | DNM1   |
| 9                              | 128191655                          | 128255248                  | + 10775            |        |
| protein_coding                 | dynamins 1 [Source:HGNC            |                            |                    |        |
| Symbol;Acc:HGNC:2972]          | -                                  |                            |                    |        |
| 1075                           | 1365 1980                          | 944 885                    | 992 5.456144934    |        |
| 5.585336337                    | 8.512367545                        | 4.23599981                 | 3.57918865         |        |
| 4.297742877                    |                                    |                            |                    |        |
| ENSG00000148834                | 2903.973806                        | 2879.110243                | 2149.200919        |        |
| 3376.387404                    | 4465.119361                        | 4029.852138                | 2644.094989        |        |
| 3957.119635                    | -0.581882585                       | 0.000297365                | 0.004033562        | GSTO1  |
| 10                             | 104235356                          | 104267459                  | + 1691             |        |
| protein_coding                 | glutathione S-transferase          | omega 1 [Source:HGNC       |                    |        |
| Symbol;Acc:HGNC:13312]         | -                                  | 2510 3106                  | 2198 3361          | 4886   |
| 4107                           | 81.17547276                        | 80.982616                  | 60.21248294        |        |
| 96.10060491                    | 125.9123857                        | 113.3775665                |                    |        |
| ENSG00000177311                | 3772.852025                        | 2160.723109                | 3070.287027        |        |
| 1860.478867                    | 1769.232723                        | 2042.890712                | 3001.287387        |        |
| 1890.867434                    | 0.666177549                        | 0.000298061                | 0.004039408        | ZBTB38 |
| 3                              | 141324213                          | 141449792                  | + 14243            |        |
| protein_coding                 | zinc finger and BTB domain         | containing 38 [Source:HGNC |                    |        |
| Symbol;Acc:HGNC:26636]         | ZBTB                               | 3261 2331                  | 3140 1852          | 1936   |
| 2082                           | 12.52114478                        | 7.215638335                | 10.21246614        |        |
| 6.286960396                    | 5.923282915                        | 6.823784243                |                    |        |
| ENSG00000162244                | 21061.33034                        | 20972.26956                | 20805.5947         |        |
| 24973.8146                     | 28677.83681                        | 34677.13767                | 20946.3982         |        |
| 29442.9297                     | -0.491222962                       | 0.000298938                | 0.00404771         | RPL29  |
| 3                              | 51993522                           | 51995942                   | - 2058             |        |
| protein_coding                 | ribosomal protein L29 [Source:HGNC |                            |                    |        |
| Symbol;Acc:HGNC:10331]         | -                                  | 18204 22625                | 21278 24860        | 31381  |
| 35341                          | 483.7446435                        | 484.704638                 | 478.9474771        |        |
| 584.059336                     | 664.4770814                        | 801.6402216                |                    |        |
| ENSG00000097021                | 2987.275047                        | 3221.155214                | 3542.563662        |        |
| 1965.95958                     | 2333.084267                        | 2496.212282                | 3250.331308        |        |
| 2265.085376                    | 0.521088114                        | 0.000299647                | 0.004053714        | ACOT7  |
| 1                              | 6264269 6394391 -                  | 4124                       | protein_coding     | acyl-  |

|                                                                  |                                                        |         |             |             |                |        |
|------------------------------------------------------------------|--------------------------------------------------------|---------|-------------|-------------|----------------|--------|
| CoA thioesterase 7 [Source:HGNC Symbol;Acc:HGNC:24157]           | -                                                      |         |             |             |                | 2582   |
| 3475                                                             | 3623                                                   | 1957    | 2553        | 2544        | 34.23988474    |        |
| 37.15096596                                                      | 40.69603829                                            |         | 22.94422461 |             | 26.97682011    |        |
| 28.79681698                                                      |                                                        |         |             |             |                |        |
| ENSG00000130725                                                  | 3254.533194                                            |         | 3984.036003 |             | 3790.924459    |        |
| 5162.527483                                                      | 4728.311006                                            |         | 5569.379289 |             | 3676.497886    |        |
| 5153.405926                                                      | -0.486907182                                           |         | 0.000301821 |             | 0.004079527    | UBE2M  |
| 19                                                               | 58555712                                               |         | 58558960    |             | -              | 1831   |
| protein_coding                                                   | ubiquitin conjugating enzyme E2 M [Source:HGNC         |         |             |             |                |        |
| Symbol;Acc:HGNC:12491]                                           | -                                                      |         | 2813        | 4298        | 3877           | 5139   |
| 5676                                                             | 84.01872768                                            |         | 103.4932499 |             | 98.08665235    | 5174   |
| 135.7036378                                                      | 123.1392993                                            |         | 144.7105114 |             |                |        |
| ENSG00000155265                                                  | 363.2859662                                            |         | 162.2164496 |             | 512.3663701    |        |
| 164.7508284                                                      | 148.95916                                              |         | 98.12155195 |             | 345.956262     |        |
| 137.2771801                                                      | 1.332936606                                            |         | 0.000302285 |             | 0.004080199    |        |
| GOLGA7B 10                                                       | 97850239                                               |         | 97871580    |             | +              | 6458   |
| protein_coding                                                   | golgin A7 family member B [Source:HGNC                 |         |             |             |                |        |
| Symbol;Acc:HGNC:31668]                                           | -                                                      |         | 314         | 175         | 524            | 164    |
| 100                                                              | 2.659048876                                            |         | 1.194741546 |             | 3.758683021    | 163    |
| 1.227854833                                                      | 1.099887234                                            |         | 0.722849683 |             |                |        |
| ENSG0000011677                                                   | 503.2783289                                            |         | 523.7273946 |             | 491.8326033    |        |
| 233.0621475                                                      | 314.3677978                                            |         | 331.6508456 |             | 506.2794423    |        |
| 293.0269303                                                      | 0.788525873                                            |         | 0.000302405 |             | 0.004080199    | GABRA3 |
| X                                                                | 152166234                                              |         | 152451358   |             | -              | 4193   |
| protein_coding                                                   | gamma-aminobutyric acid type A receptor alpha3 subunit |         |             |             |                |        |
| [Source:HGNC Symbol;Acc:HGNC:4077]                               | -                                                      |         |             |             | 435            | 565    |
| 232                                                              | 344                                                    | 338     | 5.673605139 |             | 5.940972518    | 503    |
| 5.557066302                                                      | 2.675249792                                            |         | 3.575132795 |             | 3.763031673    |        |
| ENSG00000115255                                                  | 247.5897986                                            |         | 348.533629  |             | 179.9149086    |        |
| 494.2524852                                                      | 433.1695819                                            |         | 571.0674323 |             | 258.6794454    |        |
| 499.4964998                                                      | -0.948203067                                           |         | 0.000303428 |             | 0.004090395    | REEP6  |
| 19                                                               | 1490747                                                | 1497927 | +           | 2449        | protein_coding |        |
| receptor accessory protein 6 [Source:HGNC Symbol;Acc:HGNC:30078] |                                                        |         |             |             |                |        |
| -                                                                | 214                                                    | 376     | 184         | 492         | 474            | 582    |
| 4.778809308                                                      | 6.769132541                                            |         | 3.480418702 |             | 9.713540027    |        |
| 8.434282714                                                      | 11.09379753                                            |         |             |             |                |        |
| ENSG00000144713                                                  | 13821.06418                                            |         | 17191.23586 |             | 16446.56936    |        |
| 19607.35774                                                      | 22055.09428                                            |         | 25494.92284 |             | 15819.62313    |        |
| 22385.79162                                                      | -0.500812039                                           |         | 0.00030856  |             | 0.004151381    | RPL32  |
| 3                                                                | 12834485                                               |         | 12841588    |             | -              | 3720   |
| protein_coding                                                   | ribosomal protein L32 [Source:HGNC                     |         |             |             |                |        |
| Symbol;Acc:HGNC:10336]                                           | -                                                      |         | 11946       | 18546       | 16820          | 19518  |
| 25983                                                            | 175.6201255                                            |         | 219.8068758 |             | 209.4524802    | 24134  |
| 253.6842999                                                      | 282.7124708                                            |         | 326.0561448 |             |                |        |
| ENSG00000105355                                                  | 3547.244498                                            |         | 3876.509671 |             | 3469.228781    |        |
| 4690.375719                                                      | 4765.779261                                            |         | 5939.297539 |             | 3630.994316    |        |
| 5131.817506                                                      | -0.499013719                                           |         | 0.000308693 |             | 0.004151381    | PLIN3  |
| 19                                                               | 4838341                                                | 4867768 | -           | 2813        | protein_coding |        |
| perilipin 3 [Source:HGNC Symbol;Acc:HGNC:16893]                  |                                                        |         |             |             |                |        |
| -                                                                |                                                        |         |             |             | 3066           | 4182   |
| 3548                                                             | 4669                                                   | 5215    | 6053        | 59.60698169 | 65.546311      |        |

|                          |                                                  |             |             |                |             |
|--------------------------|--------------------------------------------------|-------------|-------------|----------------|-------------|
|                          | 58.4273696                                       | 80.25190646 | 80.78731573 | 100.4493146    |             |
| ENSG00000120699          | 1597.764074                                      | 1284.754281 | 1287.760514 |                |             |
| 917.1799167              | 954.069712                                       | 938.0420366 | 1390.092956 |                |             |
| 936.4305551              | 0.569293577                                      | 0.000308767 | 0.004151381 | EXOSC8         |             |
| 13                       | 36998816                                         | 37009613    | +           | 3630           |             |
| protein_coding           | exosome component 8 [Source:HGNC                 |             |             |                |             |
| Symbol;Acc:HGNC:17035]   | -                                                | 1381        | 1386        | 1317           | 913         |
| 956                      | 20.8056729                                       | 16.8341256  | 16.80666741 |                | 1044        |
| 12.16089025              | 12.53292588                                      | 12.2941159  |             |                |             |
| ENSG00000129910          | 20.82531016                                      | 25.0276808  | 25.42275882 |                | 0           |
| 0                        | 1.962431039                                      | 23.75858326 | 0.65414368  |                |             |
| 5.198999087              | 0.000311286                                      | 0.004181569 | CDH15       | 16             |             |
| 89171767                 | 89195492                                         | +           | 4628        | protein_coding |             |
| cadherin 15 [Source:HGNC | Symbol;Acc:HGNC:1754]                            |             |             |                |             |
| -                        |                                                  |             | 18          |                | 27          |
| 26                       | 0                                                | 0           | 2           | 0.212703124    | 0.257219786 |
| 0.260245035              | 0                                                | 0           | 0.020173566 |                |             |
| ENSG00000105974          | 13689.17055                                      | 9039.627526 | 9397.620578 |                |             |
| 6520.717239              | 7086.069489                                      | 7783.0015   | 10708.80622 |                |             |
| 7129.92941               | 0.586696155                                      | 0.000312771 | 0.004197834 | CAV1           |             |
| 7                        | 116524785                                        | 116561184   | +           | 4082           |             |
| protein_coding           | caveolin 1 [Source:HGNC Symbol;Acc:HGNC:1527]    |             |             |                |             |
| -                        |                                                  |             |             |                |             |
| 11832                    | 9752                                             | 9611        | 6491        | 7754           | 7932        |
| 105.3306223              | 109.0681716                                      | 76.8846825  |             |                | 158.5184705 |
| 90.7101199               |                                                  |             |             |                | 82.77732619 |
| ENSG00000115648          | 1855.766528                                      | 1566.547428 | 2007.420148 |                |             |
| 1263.759403              | 844.4065267                                      | 1299.129348 | 1809.911368 |                |             |
| 1135.765093              | 0.67246752                                       | 0.000314012 | 0.004210411 | MLPH           |             |
| 2                        | 237485428                                        | 237555318   | +           | 7514           |             |
| protein_coding           | melanophilin [Source:HGNC Symbol;Acc:HGNC:29643] |             |             |                |             |
| -                        |                                                  |             |             |                |             |
| 11.67422034              | 1604                                             | 1690        | 2053        | 1258           | 924         |
| 5.358699185              | 9.91629577                                       | 12.65669208 | 8.094884693 |                |             |
| 8.225509915              |                                                  |             |             |                |             |
| ENSG00000100228          | 344.7745794                                      | 372.6343586 | 238.5828135 |                |             |
| 543.4768181              | 559.282245                                       | 563.2177082 | 318.6639172 |                |             |
| 555.3255904              | -0.801565196                                     | 0.000314259 | 0.004210411 | RAB36          |             |
| 22                       | 23145326                                         | 23164350    | +           | 4107           |             |
| protein_coding           | "RAB36, member RAS oncogene family [Source:HGNC  |             |             |                |             |
| Symbol;Acc:HGNC:9775]"   | -                                                | 298         | 402         | 244            | 541         |
| 574                      | 3.968133493                                      | 4.315541608 | 2.752121349 |                | 612         |
| 6.369037101              | 6.493596771                                      | 6.524289527 |             |                |             |
| ENSG00000198056          | 585.4226079                                      | 597.8834858 | 617.968599  |                |             |
| 377.7214115              | 406.6676454                                      | 261.0033282 | 600.4248976 |                |             |
| 348.4641284              | 0.784703588                                      | 0.000315312 | 0.004219687 | PRIM1          |             |
| 12                       | 56731596                                         | 56752373    | -           | 2437           |             |
| protein_coding           | DNA primase subunit 1 [Source:HGNC               |             |             |                |             |
| Symbol;Acc:HGNC:9369]    | -                                                | 506         | 645         | 632            | 376         |
| 266                      | 11.35506698                                      | 11.66912101 | 12.01334654 |                | 445         |
| 7.459909043              | 7.957251404                                      | 5.095327969 |             |                |             |
| ENSG00000140319          | 3839.955802                                      | 3310.142524 | 3267.802307 |                |             |
| 2511.445555              | 2548.755198                                      | 2466.775816 | 3472.633544 |                |             |



|                            |                                             |                        |                        |       |
|----------------------------|---------------------------------------------|------------------------|------------------------|-------|
| 2508.99219                 | 0.468662994                                 | 0.000315503            | 0.004219687            | SRP14 |
| 15                         | 40035739                                    | 40039188               | - 2005                 |       |
| protein_coding             | signal recognition particle 14              | [Source:HGNC           |                        |       |
| Symbol;Acc:HGNC:11299]     | -                                           | 3319 3571              | 3342 2500              | 2789  |
| 2514                       | 90.52897188                                 | 78.52526871            | 77.21372854            |       |
| 60.28744076                | 60.61676219                                 | 58.53248092            |                        |       |
| ENSG00000112379            | 106.4404742                                 | 159.4355962            | 91.91305112            |       |
| 222.0117871                | 318.0232373                                 | 243.3414488            | 119.2630405            |       |
| 261.1254911                | -1.129083722                                | 0.000316181            | 0.00422505             |       |
| ARFGEF3 6                  | 138161921                                   | 138344663              | + 14877                |       |
| protein_coding             | ARFGEF family member 3                      | [Source:HGNC           |                        |       |
| Symbol;Acc:HGNC:21213]     | -                                           | 92 172                 | 94 221                 | 348   |
| 248                        | 0.338194996                                 | 0.509738037            | 0.292694759            |       |
| 0.718254122                | 1.019348008                                 | 0.778184101            |                        |       |
| ENSG00000164535            | 888.5465669                                 | 1106.779662            | 896.6411476            |       |
| 1524.949741                | 1352.512619                                 | 1425.70615             | 963.9891256            |       |
| 1434.389503                | -0.572666438                                | 0.000317607            | 0.004240404            | DAGLB |
| 7                          | 6409126 6484190                             | - 5756                 | protein_coding         |       |
| diacylglycerol lipase beta | [Source:HGNC                                | Symbol;Acc:HGNC:28923] | -                      |       |
| 768                        | 1194 917                                    | 1518 1480              | 1453 7.296845445       |       |
| 9.145711542                | 7.379908992                                 | 12.75123362            | 11.20468181            |       |
| 11.78394929                |                                             |                        |                        |       |
| ENSG00000232679            | 38.1797353                                  | 101.9646255            | 29.33395248            |       |
| 233.0621475                | 180.9442557                                 | 126.576802             | 56.49277109            |       |
| 180.1944017                | -1.668094579                                | 0.00031899             | 0.004255149            |       |
| LINC01705                  | 1 222041705                                 | 222064763              | -                      | 562   |
| lincRNA                    | long intergenic non-protein coding RNA 1705 |                        |                        |       |
| [Source:HGNC               | Symbol;Acc:HGNC:52493]                      | -                      | 33 110                 | 30    |
| 232                        | 198 129                                     | 3.211236837            | 8.629593281            |       |
| 2.472790906                | 19.95964836                                 | 15.35279576            | 10.715179              |       |
| ENSG00000173852            | 3447.745794                                 | 2780.853423            | 3208.156603            |       |
| 2261.305578                | 2183.211247                                 | 2281.326083            | 3145.585273            |       |
| 2241.947636                | 0.488340369                                 | 0.00031991             | 0.004261804            |       |
| DPY19L1 7                  | 34928876                                    | 35038271               | - 6278                 |       |
| protein_coding             | dpy-19 like C-mannosyltransferase 1         | [Source:HGNC           |                        |       |
| Symbol;Acc:HGNC:22205]     | -                                           | 2980 3000              | 3281 2251              | 2389  |
| 2325                       | 25.95910203                                 | 21.06851382            | 24.20958667            |       |
| 17.33625954                | 16.58263097                                 | 17.28811655            |                        |       |
| ENSG00000186340            | 894.3313753                                 | 845.3794405            | 1542.965901            |       |
| 700.1910208                | 600.4059395                                 | 555.367984             | 1094.225572            |       |
| 618.6549814                | 0.823053852                                 | 0.000320046            | 0.004261804            | THBS2 |
| 6                          | 169215780                                   | 169254044              | - 6412                 |       |
| protein_coding             | thrombospondin 2                            | [Source:HGNC           | Symbol;Acc:HGNC:11786] |       |
| -                          | 773 912                                     | 1578 697               | 657 566                |       |
| 6.592963827                | 6.270978079                                 | 11.4002911             | 5.255819972            |       |
| 4.465092432                | 4.120680603                                 |                        |                        |       |
| ENSG00000044090            | 1956.422194                                 | 2398.022601            | 2119.866966            |       |
| 3109.169597                | 2819.257722                                 | 3233.105137            | 2158.10392             |       |
| 3053.844152                | -0.500443151                                | 0.000320585            | 0.004265259            | CUL7  |
| 6                          | 43037617                                    | 43053945               | - 5628                 |       |

|                                   |                                                 |             |             |             |             |                |             |
|-----------------------------------|-------------------------------------------------|-------------|-------------|-------------|-------------|----------------|-------------|
| protein_coding                    | cullin 7 [Source:HGNC Symbol;Acc:HGNC:21024]    |             |             |             |             |                | -           |
|                                   | 1691                                            | 2587        | 2168        | 3095        | 3085        | 3295           | 16.43176562 |
|                                   | 20.26638543                                     |             | 17.844634   |             | 26.58935369 |                | 23.88689373 |
|                                   | 27.33048672                                     |             |             |             |             |                |             |
| ENSG00000136717                   | 1479.753983                                     |             |             | 1770.476679 |             | 2124.755958    |             |
| 1045.765929                       | 1124.961509                                     |             |             | 1320.716089 |             | 1791.662207    |             |
| 1163.814509                       | 0.62281615                                      |             |             | 0.000323152 |             | 0.004295673    | BIN1        |
|                                   | 2                                               | 127048027   |             | 127107355   |             | -              | 6929        |
| protein_coding                    | bridging integrator 1 [Source:HGNC              |             |             |             |             |                |             |
| Symbol;Acc:HGNC:1052]             | -                                               |             |             | 1279        | 1910        | 2173           | 1041        |
|                                   | 1346                                            | 10.09472973 |             | 12.15337123 |             | 14.52752464    | 1231        |
| 7.264092816                       | 7.741873831                                     |             |             | 9.068188399 |             |                |             |
| ENSG00000187741                   | 2123.024675                                     |             |             | 2088.42092  |             | 2503.163945    |             |
| 1596.274795                       | 1257.471191                                     |             |             | 1669.047599 |             | 2238.20318     |             |
| 1507.597862                       | 0.570377935                                     |             |             | 0.000323765 |             | 0.004300085    | FANCA       |
|                                   | 16                                              | 89737549    |             | 89816657    |             | -              | 9736        |
| protein_coding                    | FA complementation group A [Source:HGNC         |             |             |             |             |                |             |
| Symbol;Acc:HGNC:3582]             | -                                               |             |             | 1835        | 2253        | 2560           | 1589        |
|                                   | 1701                                            | 10.30742578 |             | 10.20268749 |             | 12.18040856    | 1376        |
| 7.891227217                       | 6.158805181                                     |             |             | 8.155860413 |             |                |             |
| ENSG00000184371                   | 3142.307911                                     |             |             | 3394.495078 |             | 7977.857277    |             |
| 1600.293108                       | 1172.482223                                     |             |             | 1539.52715  |             | 4838.220089    |             |
| 1437.43416                        | 1.75103581                                      |             |             | 0.000324471 |             | 0.004305613    | CSF1        |
|                                   | 1                                               | 109910242   |             | 109930992   |             | +              | 5418        |
| protein_coding                    | colony stimulating factor 1 [Source:HGNC        |             |             |             |             |                |             |
| Symbol;Acc:HGNC:2432]             | -                                               |             |             | 2716        | 3662        | 8159           | 1593        |
|                                   | 1569                                            | 27.41482498 |             | 29.79979643 |             | 69.75902279    | 1283        |
| 14.21601888                       | 10.31920531                                     |             |             | 13.51854586 |             |                |             |
| ENSG00000176619                   | 7351.334487                                     |             |             | 9616.191135 |             | 13471.12878    |             |
| 6899.443229                       | 5495.039443                                     |             |             | 6751.743989 |             | 10146.21813    |             |
| 6382.075554                       | 0.66896691                                      |             |             | 0.000324745 |             | 0.004305613    | LMNB2       |
|                                   | 19                                              | 2427638     | 2456996     | -           | 5432        | protein_coding | lamin       |
| B2 [Source:HGNC                   | Symbol;Acc:HGNC:6638]                           |             |             |             |             |                | -           |
|                                   | 6868                                            | 6013        | 6881        | 63.97085598 |             | 84.20161867    | 13777       |
| 117.4890394                       | 61.13244161                                     |             |             | 48.23808299 |             | 59.13407835    |             |
| ENSG00000141429                   | 1789.819712                                     |             |             | 1136.442099 |             | 1671.057493    |             |
| 966.4042496                       | 958.6390114                                     |             |             | 985.1403815 |             | 1532.439768    |             |
| 970.0612142                       | 0.659134216                                     |             |             | 0.000329144 |             | 0.004360156    | GALNT1      |
|                                   | 18                                              | 35581117    |             | 35711834    |             | +              | 5126        |
| protein_coding                    | polypeptide N-acetylgalactosaminyltransferase 1 |             |             |             |             |                |             |
| [Source:HGNC                      | Symbol;Acc:HGNC:4123]                           |             |             |             |             |                | -           |
|                                   | 962                                             | 1049        | 1004        | 16.50465401 |             | 10.5449816     | 1709        |
| 15.44421777                       | 9.073977262                                     |             |             | 8.91775392  |             | 9.143261624    |             |
| ENSG00000107249                   | 718.4732006                                     |             |             | 481.0876421 |             | 804.7280965    |             |
| 441.0098395                       | 351.8360528                                     |             |             | 329.6884145 |             | 668.0963131    |             |
| 374.1781023                       | 0.83607797                                      |             |             | 0.000332057 |             | 0.004394942    | GLIS3       |
|                                   | 9                                               | 3824127     | 4348392     | -           | 11826       | protein_coding | GLIS        |
| family zinc finger 3 [Source:HGNC | Symbol;Acc:HGNC:28510]                          |             |             |             |             |                | zf-         |
| C2H2                              | 621                                             | 519         | 823         | 439         | 385         | 336            | 2.871761959 |
|                                   | 1.934921905                                     |             | 3.223772723 |             | 1.794848771 |                | 1.418670221 |

|                                     |                                                  |             |             |             |       |             |   |
|-------------------------------------|--------------------------------------------------|-------------|-------------|-------------|-------|-------------|---|
| 1.326317313                         |                                                  |             |             |             |       |             |   |
| ENSG00000140350                     | 2254.918306                                      | 2305.327487 | 2557.920657 |             |       |             |   |
| 1409.423245                         | 1733.592187                                      | 1783.849814 | 2372.72215  |             |       |             |   |
| 1642.288416                         | 0.530801056                                      | 0.000332961 | 0.00440309  |             |       | ANP32A      |   |
| 15                                  | 68778535                                         | 68820897    | -           | 7544        |       |             |   |
| protein_coding                      | acidic nuclear phosphoprotein 32 family member A |             |             |             |       |             |   |
| [Source:HGNC Symbol;Acc:HGNC:13233] | -                                                |             | 1949        | 2487        |       | 2616        |   |
| 1403                                | 1897                                             | 1818        | 14.12878681 | 14.53476664 |       |             |   |
| 16.06343853                         | 8.992018832                                      | 10.95782219 | 11.2496299  |             |       |             |   |
| ENSG00000273119                     | 28.92404189                                      | 13.90426711 | 29.33395248 |             |       | 0           |   |
| 0                                   | 1.962431039                                      | 24.05408716 | 0.65414368  |             |       |             |   |
| 5.214554028                         | 0.000333866                                      | 0.004411248 | AP005229.2  |             |       | 18          |   |
| 11390033                            | 11390729                                         | -           | 697         | lincRNA     | novel |             |   |
| transcript                          | -                                                | 25          | 15          | 30          | 0     | 0           | 2 |
| 1.961561565                         | 0.948838807                                      | 1.993842883 | 0           |             |       | 0           |   |
| 0.133950165                         |                                                  |             |             |             |       |             |   |
| ENSG00000198720                     | 537.9871792                                      | 682.2360397 | 599.3904291 |             |       |             |   |
| 1040.743038                         | 944.0172534                                      | 848.7514243 | 606.5378827 |             |       |             |   |
| 944.5039052                         | -0.637996746                                     | 0.000335772 | 0.004432602 |             |       |             |   |
| ANKRD13B                            | 17                                               | 29589769    | 29614761    | +           |       | 3971        |   |
| protein_coding                      | ankyrin repeat domain 13B [Source:HGNC           |             |             |             |       |             |   |
| Symbol;Acc:HGNC:26363]              | -                                                | 465         | 736         | 613         | 1036  | 1033        |   |
| 865                                 | 6.403947731                                      | 8.171690043 | 7.150938504 |             |       |             |   |
| 12.61423986                         | 11.33597899                                      | 10.16862558 |             |             |       |             |   |
| ENSG00000171310                     | 296.182189                                       | 345.7527755 | 394.0527617 |             |       |             |   |
| 212.9705831                         | 169.9779372                                      | 174.6563625 | 345.3292421 |             |       |             |   |
| 185.8682942                         | 0.895014422                                      | 0.000336555 | 0.004439101 |             |       | CHST11      |   |
| 12                                  | 104455295                                        | 104762014   | +           | 6492        |       |             |   |
| protein_coding                      | carbohydrate sulfotransferase 11 [Source:HGNC    |             |             |             |       |             |   |
| Symbol;Acc:HGNC:17422]              | -                                                | 256         | 373         | 403         | 212   | 186         |   |
| 178                                 | 2.156533291                                      | 2.533169665 | 2.875603416 |             |       |             |   |
| 1.57891433                          | 1.248512891                                      | 1.279933856 |             |             |       |             |   |
| ENSG00000138764                     | 512.5340223                                      | 378.1960655 | 452.7206667 |             |       |             |   |
| 221.0072088                         | 304.3153392                                      | 206.0552591 | 447.8169182 |             |       |             |   |
| 243.7926024                         | 0.875542453                                      | 0.00033779  | 0.004451546 |             |       | CCNG2       |   |
| 4                                   | 77157151                                         | 77433388    | +           | 7471        |       |             |   |
| protein_coding                      | cyclin G2 [Source:HGNC Symbol;Acc:HGNC:1593]     |             |             |             |       |             | - |
| 443                                 | 408                                              | 463         | 220         | 333         | 210   | 3.242796552 |   |
| 2.407772138                         | 2.870811719                                      | 1.423787451 | 1.942334816 |             |       |             |   |
| 1.312159395                         |                                                  |             |             |             |       |             |   |
| ENSG00000163171                     | 1280.756575                                      | 1208.744288 | 1773.726327 |             |       |             |   |
| 815.7175163                         | 981.4855083                                      | 909.5867865 | 1421.07573  |             |       |             |   |
| 902.2632704                         | 0.655325385                                      | 0.000338128 | 0.004452166 |             |       |             |   |
| CDC42EP3                            | 2                                                | 37641882    | 37738468    | -           |       | 10406       |   |
| protein_coding                      | CDC42 effector protein 3 [Source:HGNC            |             |             |             |       |             |   |
| Symbol;Acc:HGNC:16943]              | -                                                | 1107        | 1304        | 1814        | 812   | 1074        |   |
| 927                                 | 5.817796313                                      | 5.524942058 | 8.075248894 |             |       |             |   |
| 3.772883752                         | 4.497581662                                      | 4.1585502   |             |             |       |             |   |
| ENSG00000148331                     | 570.3821061                                      | 668.3317726 | 724.5486264 |             |       |             |   |
| 939.2806376                         | 1165.171344                                      | 953.7414849 | 654.420835  |             |       |             |   |

|                                                         |                                                       |                |                          |       |
|---------------------------------------------------------|-------------------------------------------------------|----------------|--------------------------|-------|
| 1019.397822                                             | -0.638908445                                          | 0.000338726    | 0.004456194              | ASB6  |
| 9                                                       | 129634604                                             | 129642169      | - 4622                   |       |
| protein_coding                                          | ankyrin repeat and SOCS box containing 6 [Source:HGNC |                |                          |       |
| Symbol;Acc:HGNC:17181]                                  | -                                                     | 493 721        | 741 935                  | 1275  |
| 972                                                     | 5.83326479                                            | 6.877637497    | 7.426611789              |       |
| 9.780991607                                             | 12.0209514                                            | 9.817080667    |                          |       |
| ENSG0000069122                                          | 15.04050178                                           | 3.707804563    | 78.22387329              | 0     |
| 2.741579632                                             | 0                                                     | 32.32405988    | 0.913859877              |       |
| 5.104066537                                             | 0.000339897                                           | 0.00446776     | ADGRF5 6                 |       |
| 46852512                                                | 46954943                                              | - 6650         | protein_coding           |       |
| adhesion G protein-coupled receptor F5 [Source:HGNC     |                                                       |                |                          |       |
| Symbol;Acc:HGNC:19030]                                  | -                                                     | 13 4           | 80 0                     | 3     |
| 0                                                       | 0.10690953                                            | 0.026519926    | 0.557276587              | 0     |
| 0.019658854                                             | 0                                                     |                |                          |       |
| ENSG00000156110                                         | 813.344058                                            | 677.601284     | 923.0417049              |       |
| 541.4676617                                             | 470.6378369                                           | 499.4386994    | 804.6623489              |       |
| 503.848066                                              | 0.675385848                                           | 0.00034029     | 0.004469083              | ADK   |
| 10                                                      | 74151185                                              | 74709303       | + 3184                   |       |
| protein_coding                                          | adenosine kinase [Source:HGNC Symbol;Acc:HGNC:257]    |                |                          |       |
| -                                                       | 703 731                                               | 944 539        | 515 509                  |       |
| 12.0747175                                              | 10.12227835                                           | 13.7341375     | 8.184966809              |       |
| 7.048436114                                             | 7.462610229                                           |                |                          |       |
| ENSG00000125520                                         | 1405.708436                                           | 1894.688132    | 2340.849408              |       |
| 1191.429771                                             | 1155.118885                                           | 1234.369123    | 1880.415325              |       |
| 1193.63926                                              | 0.656203341                                           | 0.000341104    | 0.004475931              |       |
| SLC2A4RG                                                | 20 63739861                                           | 63743505       | + 2244                   |       |
| protein_coding                                          | SLC2A4 regulator [Source:HGNC                         |                |                          |       |
| Symbol;Acc:HGNC:15930]                                  | Others                                                | 1215 2044      | 2394 1186                | 1264  |
| 1258                                                    | 29.61066344                                           | 40.15984212    | 49.42011473              |       |
| 25.55424492                                             | 24.54611808                                           | 26.17000613    |                          |       |
| ENSG00000138061                                         | 5.784808379                                           | 20.3929251     | 19.55596832              | 0     |
| 0                                                       | 0 15.24456727                                         | 0              | 6.426108756              |       |
| 0.000341276                                             | 1                                                     | CYP1B1 2       | 38066973 38109902        |       |
| -                                                       | 6014                                                  | protein_coding | cytochrome P450 family 1 |       |
| subfamily B member 1 [Source:HGNC Symbol;Acc:HGNC:2597] |                                                       |                |                          |       |
| 22                                                      | 20 0                                                  | 0 0            | 0.045467523              | 5     |
| 0.161284716                                             | 0.154052598                                           | 0 0            | 0                        |       |
| ENSG00000119969                                         | 1554.956492                                           | 1181.862705    | 1492.120383              |       |
| 1102.02231                                              | 799.6273927                                           | 640.7337342    | 1409.646527              |       |
| 847.4611455                                             | 0.734012899                                           | 0.000347661    | 0.00455245               | HELLS |
| 10                                                      | 94501434                                              | 94613905       | + 10148                  |       |
| protein_coding                                          | "helicase, lymphoid specific [Source:HGNC             |                |                          |       |
| Symbol;Acc:HGNC:4861]"                                  | -                                                     | 1344 1275      | 1526 1097                | 875   |
| 653                                                     | 7.242917241                                           | 5.539412213    | 6.965888697              |       |
| 5.226697739                                             | 3.757389282                                           | 3.003853573    |                          |       |
| ENSG00000136068                                         | 1472.812213                                           | 1200.401727    | 1848.039007              |       |
| 1024.669786                                             | 870.9084632                                           | 985.1403815    | 1507.084316              |       |
| 960.2395437                                             | 0.6503721                                             | 0.000347744    | 0.00455245               | FLNB  |
| 3                                                       | 58008400                                              | 58172251       | + 13952                  |       |
| protein_coding                                          | filamin B [Source:HGNC Symbol;Acc:HGNC:3755]          |                |                          |       |
|                                                         |                                                       |                |                          | -     |

|                                      |                                                    |         |             |             |             |                |            |       |
|--------------------------------------|----------------------------------------------------|---------|-------------|-------------|-------------|----------------|------------|-------|
|                                      | 1273                                               | 1295    | 1890        | 1020        | 953         | 1004           | 4.98984033 |       |
|                                      | 4.09229807                                         |         | 6.275203185 |             | 3.534800605 |                | 2.97656267 |       |
|                                      | 3.359257389                                        |         |             |             |             |                |            |       |
| ENSG00000139197                      | 826.0706365                                        |         |             | 998.3263787 |             | 873.1739856    |            |       |
| 1408.418667                          | 1279.403828                                        |         |             | 1283.429899 |             | 899.1903336    |            |       |
| 1323.750798                          | -0.557246205                                       |         |             | 0.00034801  |             | 0.00455245     |            | PEX5  |
| 12                                   | 7188685                                            | 7218574 | +           | 5488        |             | protein_coding |            |       |
| peroxisomal biogenesis factor 5      | [Source:HGNC Symbol;Acc:HGNC:9719]                 |         |             |             |             |                |            |       |
| -                                    | 714                                                | 1077    |             | 893         | 1402        | 1400           | 1308       |       |
| 7.115064179                          | 8.652379478                                        |         |             | 7.537716721 |             | 12.35193869    |            |       |
| 11.11661412                          | 11.12601592                                        |         |             |             |             |                |            |       |
| ENSG00000044524                      | 122.6379376                                        |         |             | 137.1887688 |             | 139.8251735    |            |       |
| 57.26095866                          | 43.86527412                                        |         |             | 56.91050013 |             | 133.2172933    |            |       |
| 52.67891097                          | 1.340218463                                        |         |             | 0.000348127 |             | 0.00455245     |            | EPHA3 |
| 3                                    | 89107524                                           |         |             | 89482134    |             | +              | 6674       |       |
| protein_coding                       | EPH receptor A3 [Source:HGNC Symbol;Acc:HGNC:3387] |         |             |             |             |                |            |       |
| -                                    | 106                                                | 148     |             | 143         | 57          | 48             | 58         |       |
| 0.868589101                          | 0.977708681                                        |         |             | 0.992549765 |             | 0.412942773    |            |       |
| 0.313410565                          | 0.405683951                                        |         |             |             |             |                |            |       |
| ENSG00000101161                      | 5016.585826                                        |         |             | 6036.305829 |             | 5430.692403    |            |       |
| 8422.383813                          | 6727.836418                                        |         |             | 7927.240182 |             | 5494.528019    |            |       |
| 7692.486804                          | -0.485268837                                       |         |             | 0.000349271 |             | 0.004562346    |            | PRPF6 |
| 20                                   | 63981135                                           |         |             | 64033100    |             | +              | 3044       |       |
| protein_coding                       | pre-mRNA processing factor 6 [Source:HGNC          |         |             |             |             |                |            |       |
| Symbol;Acc:HGNC:15860]               | -                                                  |         |             | 4336        | 6512        | 5554           | 8384       | 7362  |
| 8079                                 | 77.90033731                                        |         |             | 94.31998038 |             | 84.52081636    |            |       |
| 133.170441                           | 105.3925137                                        |         |             | 123.896488  |             |                |            |       |
| ENSG00000162298                      | 1635.943809                                        |         |             | 1863.171793 |             | 1929.196275    |            |       |
| 2761.585532                          | 2368.724802                                        |         |             | 2551.160351 |             | 1809.437293    |            |       |
| 2560.490228                          | -0.500438492                                       |         |             | 0.00034948  |             | 0.004562346    |            | SYVN1 |
| 11                                   | 65121780                                           |         |             | 65134533    |             | -              | 5496       |       |
| protein_coding                       | synoviolin 1 [Source:HGNC Symbol;Acc:HGNC:20738]   |         |             |             |             |                |            |       |
| -                                    | 1414                                               | 2010    |             | 1973        | 2749        | 2592           | 2600       |       |
| 14.07010693                          | 16.12438991                                        |         |             | 16.62963883 |             | 24.18406115    |            |       |
| 20.55165832                          | 22.08374175                                        |         |             |             |             |                |            |       |
| ENSG00000089723                      | 63.63289216                                        |         |             | 37.07804563 |             | 55.73450972    |            |       |
| 148.6775769                          | 172.7195168                                        |         |             | 103.0276295 |             | 52.14848251    |            |       |
| 141.4749077                          | -1.44429134                                        |         |             | 0.000350711 |             | 0.004574504    |            | OTUB2 |
| 14                                   | 94026329                                           |         |             | 94048930    |             | +              | 4252       |       |
| protein_coding                       | "OTU deubiquitinase, ubiquitin aldehyde binding 2  |         |             |             |             |                |            |       |
| [Source:HGNC Symbol;Acc:HGNC:20351]" | -                                                  |         |             |             |             | 55             | 40         | 57    |
| 148                                  | 189                                                | 105     |             | 0.707398519 |             | 0.414763655    |            |       |
| 0.620989212                          | 1.682944043                                        |         |             | 1.936988963 |             | 1.152768443    |            |       |
| ENSG00000099834                      | 30.08100357                                        |         |             | 33.37024107 |             | 76.26827646    |            |       |
| 194.8881751                          | 144.3898606                                        |         |             | 99.10276747 |             | 46.5731737     |            |       |
| 146.1269344                          | -1.646381066                                       |         |             | 0.000351229 |             | 0.004577358    |            | CDHR5 |
| 11                                   | 616565                                             | 626078  | -           | 3873        |             | protein_coding |            |       |
| cadherin related family member 5     | [Source:HGNC Symbol;Acc:HGNC:7521]                 |         |             |             |             |                |            |       |
| -                                    | 26                                                 | 36      |             | 78          | 194         | 158            | 101        |       |
| 0.367130583                          | 0.409816049                                        |         |             | 0.93293108  |             | 2.421895774    |            |       |

|                                                     |                                                  |             |                |         |  |  |
|-----------------------------------------------------|--------------------------------------------------|-------------|----------------|---------|--|--|
| 1.777739768                                         | 1.217362481                                      |             |                |         |  |  |
| ENSG00000164941                                     | 1464.713481                                      | 1447.897682 | 1332.739241    |         |  |  |
| 1053.802555                                         | 988.7963874                                      | 806.559157  | 1415.116802    |         |  |  |
| 949.7193664                                         | 0.57524881                                       | 0.000354579 | 0.004617033    | INTS8   |  |  |
| 8                                                   | 94813311                                         | 94881746    | + 7866         |         |  |  |
| protein_coding                                      | integrator complex subunit 8 [Source:HGNC        |             |                |         |  |  |
| Symbol;Acc:HGNC:26048]                              | -                                                | 1266 1562   | 1363 1049      | 1082    |  |  |
| 822                                                 | 8.801860402                                      | 8.75509868  | 8.026835626    |         |  |  |
| 6.447966354                                         | 5.994209483                                      | 4.878248406 |                |         |  |  |
| ENSG00000006634                                     | 1004.242735                                      | 880.6035838 | 1062.866878    |         |  |  |
| 479.1838119                                         | 760.331418                                       | 546.5370443 | 982.5710656    |         |  |  |
| 595.3507581                                         | 0.722035569                                      | 0.000354878 | 0.004617033    | DBF4    |  |  |
| 7                                                   | 87876216                                         | 87909541    | + 4583         |         |  |  |
| protein_coding                                      | DBF4 zinc finger [Source:HGNC                    |             |                |         |  |  |
| Symbol;Acc:HGNC:17364]                              | -                                                | 868 950     | 1087 477       | 832 557 |  |  |
| 10.35772988                                         | 9.139189996                                      | 10.98707635 | 5.032337249    |         |  |  |
| 7.911012428                                         | 5.673504109                                      |             |                |         |  |  |
| ENSG00000173465                                     | 902.4301071                                      | 1127.172587 | 848.7290252    |         |  |  |
| 1426.501075                                         | 1358.909638                                      | 1540.508366 | 959.4439065    |         |  |  |
| 1441.973026                                         | -0.587214551                                     | 0.000359708 | 0.004675896    | SSSCA1  |  |  |
| 11                                                  | 65570430                                         | 65573942    | + 2008         |         |  |  |
| protein_coding                                      | Sjogren syndrome/scleroderma autoantigen 1       |             |                |         |  |  |
| [Source:HGNC                                        | Symbol;Acc:HGNC:11328]                           | -           | 780 1216       | 868     |  |  |
| 1420                                                | 1487 1570                                        | 21.2434773  | 26.69954279    |         |  |  |
| 20.02435207                                         | 34.1921061                                       | 32.27051214 | 36.49908521    |         |  |  |
| ENSG00000175352                                     | 1022.754121                                      | 1363.545128 | 640.4579626    |         |  |  |
| 1519.92685                                          | 2443.661312                                      | 1565.038754 | 1008.919071    |         |  |  |
| 1842.875639                                         | -0.86913692                                      | 0.000360661 | 0.004684297    | NRIP3   |  |  |
| 11                                                  | 8980576 9004049                                  | - 4123      | protein_coding |         |  |  |
| nuclear receptor interacting protein 3 [Source:HGNC |                                                  |             |                |         |  |  |
| Symbol;Acc:HGNC:1167]                               | -                                                | 884 1471    | 655 1513       | 2674    |  |  |
| 1595                                                | 11.72556134                                      | 15.73016564 | 7.359196868    |         |  |  |
| 17.74299008                                         | 28.26224558                                      | 18.05898713 |                |         |  |  |
| ENSG00000175213                                     | 399.1517781                                      | 513.530932  | 489.8770065    |         |  |  |
| 728.319211                                          | 758.5036983                                      | 727.0806999 | 467.5199055    |         |  |  |
| 737.9678697                                         | -0.657310171                                     | 0.000363714 | 0.004719948    | ZNF408  |  |  |
| 11                                                  | 46700818                                         | 46705912    | + 3078         |         |  |  |
| protein_coding                                      | zinc finger protein 408 [Source:HGNC             |             |                |         |  |  |
| Symbol;Acc:HGNC:20041]                              | zf-C2H2                                          | 345 554     | 501 725        | 830     |  |  |
| 741                                                 | 6.129784298                                      | 7.935514823 | 7.540003825    |         |  |  |
| 11.38860703                                         | 11.75081732                                      | 11.2381708  |                |         |  |  |
| ENSG00000225663                                     | 1035.4807                                        | 1982.74849  | 1625.100968    |         |  |  |
| 2526.514228                                         | 2258.147757                                      | 2897.529429 | 1547.776719    |         |  |  |
| 2560.730471                                         | -0.725549242                                     | 0.000364888 | 0.004727891    | MCRIP1  |  |  |
| 17                                                  | 81822361                                         | 81833302    | - 3726         |         |  |  |
| protein_coding                                      | MAPK regulated corepressor interacting protein 1 |             |                |         |  |  |
| [Source:HGNC                                        | Symbol;Acc:HGNC:28007]                           | -           | 895 2139       | 1662    |  |  |
| 2515                                                | 2471 2953                                        | 13.13635564 | 25.31056804    |         |  |  |
| 20.66286911                                         | 32.63595723                                      | 28.8993778  | 36.99701045    |         |  |  |
| ENSG00000105372                                     | 18262.64005                                      | 20751.65519 | 21790.2377     |         |  |  |

|                                                                  |                                                |             |                |                |
|------------------------------------------------------------------|------------------------------------------------|-------------|----------------|----------------|
| 24509.69946                                                      | 29527.7265                                     | 29603.27222 | 20268.17765    |                |
| 27880.23273                                                      | -0.45999872                                    | 0.000364958 | 0.004727891    | RPS19          |
| 19                                                               | 41859918                                       | 41872926    | + 3799         |                |
| protein_coding ribosomal protein S19 [Source:HGNC                |                                                |             |                |                |
| Symbol;Acc:HGNC:10402] - 15785 22387 22285 24398 32311           |                                                |             |                |                |
| 30170                                                            | 227.2322692                                    | 259.8128122 | 271.7351381    |                |
| 310.5175493                                                      | 370.6292608                                    | 370.7251525 |                |                |
| ENSG00000130487                                                  | 0                                              | 6.488657986 | 5.866790497    | 66.30216265    |
|                                                                  | 22.84649694                                    | 35.3237587  | 4.118482828    | 41.4908061     |
|                                                                  | -3.29986874                                    | 0.000365254 | 0.004727891    | KLHDC7B 22     |
|                                                                  | 50545891                                       | 50551023    | + 5133         | protein_coding |
| kelch domain containing 7B [Source:HGNC Symbol;Acc:HGNC:25145]   |                                                |             |                |                |
| -                                                                | 0                                              | 7           | 6              | 66 25 36 0     |
|                                                                  | 0.060125781                                    | 0.054148003 | 0.621690009    | 0.212240051    |
|                                                                  | 0.327398943                                    |             |                |                |
| ENSG00000173281                                                  | 964.9060375                                    | 952.9057728 | 474.2322318    |                |
| 1387.322525                                                      | 1714.40113                                     | 1206.895089 | 797.3480141    |                |
| 1436.206248                                                      | -0.849499013                                   | 0.000366546 | 0.0047406      |                |
| PPP1R3B 8                                                        | 9136255 9151574                                | - 5776      | protein_coding |                |
| protein phosphatase 1 regulatory subunit 3B [Source:HGNC         |                                                |             |                |                |
| Symbol;Acc:HGNC:14942] - 834 1028 485 1381 1876                  |                                                |             |                |                |
|                                                                  | 1230 7.896480711                               | 7.846931981 | 3.889708087    |                |
| 11.56026289                                                      | 14.15351297                                    | 9.940860118 |                |                |
| ENSG00000163297                                                  | 2835.713067                                    | 3272.137527 | 2733.924372    |                |
| 3709.907374                                                      | 4812.386114                                    | 4113.255458 | 2947.258322    |                |
| 4211.849649                                                      | -0.515041188                                   | 0.000369648 | 0.004776681    | ANTXR2         |
| 4                                                                | 79901149                                       | 80125454    | - 9864         |                |
| protein_coding ANTXR cell adhesion molecule 2 [Source:HGNC       |                                                |             |                |                |
| Symbol;Acc:HGNC:21732] - 2451 3530 2796 3693 5266                |                                                |             |                |                |
|                                                                  | 4192 13.58892058                               | 15.77813253 | 13.1306601     |                |
| 18.10203751                                                      | 23.26410712                                    | 19.83874733 |                |                |
| ENSG00000196365                                                  | 4485.540417                                    | 5629.374278 | 5562.69519     |                |
| 9139.652664                                                      | 6003.145535                                    | 8412.941864 | 5225.869962    |                |
| 7851.913354                                                      | -0.587174342                                   | 0.000370931 | 0.004789205    | LONP1          |
| 19                                                               | 5691834 5720572                                | - 5085      | protein_coding | "lon           |
| peptidase 1, mitochondrial [Source:HGNC Symbol;Acc:HGNC:9479]" - |                                                |             |                |                |
|                                                                  | 3877 6073 5689 9098 6569 8574 41.69649564      |             |                |                |
|                                                                  | 52.65580806 51.82596916 86.5079841 56.29462135 |             |                |                |
|                                                                  | 78.71156687                                    |             |                |                |
| ENSG00000242372                                                  | 2880.834573                                    | 4213.919886 | 3630.565519    |                |
| 5153.486279                                                      | 4688.101171                                    | 6220.906393 | 3575.106659    |                |
| 5354.164615                                                      | -0.582335614                                   | 0.000372829 | 0.00480965     | EIF6           |
| 20                                                               | 35278911                                       | 35284985    | - 1631         |                |
| protein_coding eukaryotic translation initiation factor 6        |                                                |             |                |                |
| [Source:HGNC Symbol;Acc:HGNC:6159] - 2490 4546 3713              |                                                |             |                |                |
|                                                                  | 5130 5130 6340 83.49108382                     |             | 122.8879865    |                |
| 105.456522                                                       | 152.0773795                                    | 137.0635581 | 181.4601781    |                |
| ENSG00000092201                                                  | 6939.456131                                    | 6850.168931 | 6741.920079    |                |
| 5413.672038                                                      | 4927.532459                                    | 5111.151641 | 6843.84838     |                |
| 5150.785379                                                      | 0.410037247                                    | 0.0003775   | 0.004865802    |                |

|                                     |                                                        |             |             |             |             |
|-------------------------------------|--------------------------------------------------------|-------------|-------------|-------------|-------------|
| SUPT16H 14                          | 21351472                                               | 21384266    | -           | 7151        |             |
| protein_coding                      | "SPT16 homolog, facilitates chromatin remodeling       |             |             |             |             |
| subunit                             | [Source:HGNC Symbol;Acc:HGNC:11465]"                   |             |             |             |             |
|                                     | 6895                                                   | 5389        | 5392        | 5209        | 45.87059739 |
|                                     | 44.66526842                                            | 36.43700079 | 32.85804373 | 34.00428248 |             |
| ENSG00000128951                     | 1890.475378                                            | 2260.833833 | 2235.247179 |             |             |
| 940.2852158                         | 1464.003524                                            | 1590.550357 | 2128.85213  |             |             |
| 1331.613032                         | 0.67691551                                             | 0.00037785  | 0.004866212 |             | DUT         |
| 15                                  | 48331011                                               | 48343373    | +           | 3674        |             |
| protein_coding                      | deoxyuridine triphosphatase [Source:HGNC               |             |             |             |             |
| Symbol;Acc:HGNC:3078]               | -                                                      | 1634        | 2439        | 2286        | 936         |
| 1621                                | 24.32246645                                            | 29.26891385 | 28.82302311 |             | 1602        |
| 12.31793515                         | 19.00124062                                            | 20.59633271 |             |             |             |
| ENSG00000148948                     | 28.92404189                                            | 77.86389583 | 62.57909863 |             |             |
| 15.06867333                         | 6.397019142                                            | 9.812155195 | 56.45567879 |             |             |
| 10.42594922                         | 2.444388557                                            | 0.000379379 | 0.004881793 |             | LRRC4C      |
| 11                                  | 40114203                                               | 41459773    | -           | 5356        |             |
| protein_coding                      | leucine rich repeat containing 4C [Source:HGNC         |             |             |             |             |
| Symbol;Acc:HGNC:29317]              | -                                                      | 25          | 84          | 64          | 15          |
| 10                                  | 0.255266694                                            | 0.691468938 | 0.553530889 |             | 7           |
| 0.135410365                         | 0.05695293                                             | 0.087157641 |             |             |             |
| ENSG00000279095                     | 174.701213                                             | 227.1030295 | 145.691964  |             |             |
| 346.5794866                         | 321.6786769                                            | 366.9746043 | 182.4987355 |             |             |
| 345.0775892                         | -0.917820544                                           | 0.000380112 | 0.004887108 |             |             |
| AC243964.3                          | 19                                                     | 44664131    | 44666158    | +           | 2028        |
| TEC                                 | TEC                                                    | -           | 151         | 245         | 149         |
| 374                                 | 4.071961934                                            | 5.32637932  | 3.403460962 | 345         | 352         |
| 8.22531163                          | 7.563682854                                            | 8.608940126 |             |             |             |
| ENSG00000144749                     | 1640.571656                                            | 1332.955741 | 1636.834549 |             |             |
| 1013.619426                         | 1072.871496                                            | 1072.468563 | 1536.787315 |             |             |
| 1052.986495                         | 0.545023077                                            | 0.000382649 | 0.004915599 |             | LRIG1       |
| 3                                   | 66378797                                               | 66501263    | -           | 7032        |             |
| protein_coding                      | leucine rich repeats and immunoglobulin like domains 1 |             |             |             |             |
| [Source:HGNC Symbol;Acc:HGNC:17360] | -                                                      |             | 1418        | 1438        | 1674        |
| 1009                                | 1174                                                   | 1093        | 11.02788127 | 9.016001638 |             |
| 11.0275503                          | 6.937668123                                            | 7.275248509 | 7.255833957 |             |             |
| ENSG00000123737                     | 1733.12859                                             | 1476.633167 | 1385.540356 |             |             |
| 1025.674365                         | 1089.320974                                            | 1036.163589 | 1531.767371 |             |             |
| 1050.386309                         | 0.543721071                                            | 0.000383917 | 0.004927746 |             | EXOSC9      |
| 4                                   | 121801317                                              | 121817021   | +           | 4711        |             |
| protein_coding                      | exosome component 9 [Source:HGNC Symbol;Acc:HGNC:9137] |             |             |             |             |
| -                                   | 1498                                                   | 1593        | 1417        | 1021        | 1192        |
| 17.38975334                         | 14.908592                                              | 13.93346727 | 10.47885557 |             |             |
| 11.02609548                         | 10.46397877                                            |             |             |             |             |
| ENSG00000109917                     | 4188.201266                                            | 4645.879118 | 3800.702444 |             |             |
| 5468.923841                         | 5940.089203                                            | 5919.673229 | 4211.594276 |             |             |
| 5776.228758                         | -0.455723795                                           | 0.000385989 | 0.004950174 |             | ZPR1        |
| 11                                  | 116773799                                              | 116788050   | -           | 7069        |             |
| protein_coding                      | ZPR1 zinc finger [Source:HGNC Symbol;Acc:HGNC:13051]   |             |             |             |             |
| -                                   | 3620                                                   | 5012        | 3887        | 5444        | 6500        |
|                                     |                                                        |             | 6033        |             |             |



|                          |                                                     |                 |                |        |
|--------------------------|-----------------------------------------------------|-----------------|----------------|--------|
| 28.00562709              | 31.25986072                                         | 25.47176356     | 37.23585679    |        |
| 40.06950457              | 39.84018803                                         |                 |                |        |
| ENSG00000055044          | 3164.290183                                         | 3475.139827     | 3171.000264    |        |
| 2346.694727              | 2232.559681                                         | 2550.179135     | 3270.143425    |        |
| 2376.477847              | 0.460701007                                         | 0.000386657     | 0.004954588    | NOP58  |
| 2                        | 202265716                                           | 202303666       | + 3299         |        |
| protein_coding           | NOP58 ribonucleoprotein [Source:HGNC                |                 |                |        |
| Symbol;Acc:HGNC:29926]   | -                                                   | 2735 3749       | 3243 2336      | 2443   |
| 2599                     | 45.33876937                                         | 50.10338672     | 45.5372803     |        |
| 34.23668755              | 32.27005824                                         | 36.77646651     |                |        |
| ENSG00000176485          | 192.0556382                                         | 208.5640067     | 340.2738488    |        |
| 132.6043253              | 102.3523063                                         | 100.083983      | 246.9644979    |        |
| 111.6802049              | 1.146329831                                         | 0.000388228     | 0.004970549    |        |
| PLA2G16 11               | 63573195                                            | 63616883        | - 3116         |        |
| protein_coding           | phospholipase A2 group XVI [Source:HGNC             |                 |                |        |
| Symbol;Acc:HGNC:17825]   | -                                                   | 166 225         | 348 132        | 112    |
| 102                      | 2.913435124                                         | 3.183603893     | 5.173497586    |        |
| 2.04822517               | 1.566315232                                         | 1.528089384     |                |        |
| ENSG00000072071          | 461.6277086                                         | 639.5962872     | 600.3682275    |        |
| 1129.145922              | 864.511444                                          | 802.6342949     | 567.1974078    |        |
| 932.0972202              | -0.715321694                                        | 0.00038879      | 0.004973584    | ADGRL1 |
| 19                       | 14147743                                            | 14206187        | - 8487         |        |
| protein_coding           | adhesion G protein-coupled receptor L1 [Source:HGNC |                 |                |        |
| Symbol;Acc:HGNC:20973]   | -                                                   | 399 690         | 614 1124       | 946    |
| 818                      | 2.571067072                                         | 3.584502161     | 3.351325606    |        |
| 6.40343972               | 4.857306761                                         | 4.499301924     |                |        |
| ENSG00000130508          | 1793.290597                                         | 1185.570509     | 2890.372118    |        |
| 864.9418492              | 456.0160788                                         | 579.898372      | 1956.411075    |        |
| 633.6187667              | 1.626649446                                         | 0.000392614     | 0.005018307    | PXDN   |
| 2                        | 1631887 1744852                                     | - 11257         | protein_coding |        |
| peroxidasin [Source:HGNC | Symbol;Acc:HGNC:14966]                              |                 |                |        |
| 2956                     | 861 499                                             | 591 7.530152036 | 5.009355303    | 1279   |
| 12.16421869              | 3.698125981                                         | 1.931685755     | 2.450816811    |        |
| ENSG00000123130          | 680.2934653                                         | 677.601284      | 688.370085     |        |
| 407.8587581              | 477.034856                                          | 428.791182      | 682.0882781    |        |
| 437.8949321              | 0.639025044                                         | 0.000393638     | 0.005027182    | ACOT9  |
| X                        | 23702253                                            | 23766475        | - 5046         |        |
| protein_coding           | acyl-CoA thioesterase 9 [Source:HGNC                |                 |                |        |
| Symbol;Acc:HGNC:17152]   | -                                                   | 588 731         | 704 406        | 522    |
| 437                      | 6.372719346                                         | 6.387105485     | 6.462906438    |        |
| 3.890272327              | 4.507978692                                         | 4.042781099     |                |        |
| ENSG00000065923          | 332.0480009                                         | 377.2691143     | 280.6281454    |        |
| 645.9437968              | 471.5516967                                         | 574.9922944     | 329.9817536    |        |
| 564.162596               | -0.773099                                           | 0.000400709     | 0.005113217    | SLC9A7 |
| X                        | 46599252                                            | 46759172        | - 10033        |        |
| protein_coding           | solute carrier family 9 member A7 [Source:HGNC      |                 |                |        |
| Symbol;Acc:HGNC:17123]   | -                                                   | 287 407         | 287 643        | 516    |
| 586                      | 1.564392759                                         | 1.78853546      | 1.325114909    |        |
| 3.098713164              | 2.241183865                                         | 2.726546066     |                |        |
| ENSG00000125676          | 3732.358366                                         | 3236.913384     | 3941.505416    |        |

|                                            |                                                        |                 |              |        |
|--------------------------------------------|--------------------------------------------------------|-----------------|--------------|--------|
| 2913.276844                                | 2113.757896                                            | 2463.832169     | 3636.925722  |        |
| 2496.955637                                | 0.542629673                                            | 0.000406907     | 0.005187977  | THO2   |
| X                                          | 123600561                                              | 123733056       | - 10277      |        |
| protein_coding                             | THO complex 2 [Source:HGNC Symbol;Acc:HGNC:19073]      |                 |              |        |
| -                                          | 3226 3492                                              | 4031 2900       | 2313 2511    |        |
| 17.16693328                                | 14.98103561                                            | 18.16974772     | 13.64372188  |        |
| 9.807715828                                | 11.40581681                                            |                 |              |        |
| ENSG00000152495                            | 585.4226079                                            | 434.7400851     | 588.6346465  |        |
| 389.7763501                                | 222.0679502                                            | 249.2287419     | 536.2657798  |        |
| 287.0243474                                | 0.902099567                                            | 0.000410489     | 0.00522929   | CAMK4  |
| 5                                          | 111223653                                              | 111494886       | + 13910      |        |
| protein_coding                             | calcium/calmodulin dependent protein kinase IV         |                 |              |        |
| [Source:HGNC Symbol;Acc:HGNC:1464]         |                                                        | -               | 506 469      | 602    |
| 388                                        | 243 254                                                | 1.989381613     | 1.486550512  |        |
| 2.004803524                                | 1.348670357                                            | 0.761268292     | 0.852418021  |        |
| ENSG00000069248                            | 881.6047969                                            | 785.1276163     | 760.7271678  |        |
| 466.124295                                 | 571.1624234                                            | 528.875165      | 809.1531937  |        |
| 522.0539611                                | 0.631407928                                            | 0.000414537     | 0.005276461  | NUP133 |
| 1                                          | 229440260                                              | 229508341       | - 6080       |        |
| protein_coding                             | nucleoporin 133 [Source:HGNC Symbol;Acc:HGNC:18016]    |                 |              |        |
| -                                          | 762 847                                                | 778 464         | 625 539      |        |
| 6.854031638                                | 6.142056244                                            | 5.927594324     | 3.689908677  |        |
| 4.479556677                                | 4.138388149                                            |                 |              |        |
| ENSG00000021826                            | 996.1440028                                            | 848.1602939     | 1035.488523  |        |
| 701.195599                                 | 604.9752388                                            | 564.1989237     | 959.9309398  |        |
| 623.4565872                                | 0.622521533                                            | 0.000415316     | 0.005281972  | CPS1   |
| 2                                          | 210477682                                              | 210679107       | + 10775      |        |
| protein_coding                             | carbamoyl-phosphate synthase 1 [Source:HGNC            |                 |              |        |
| Symbol;Acc:HGNC:2323]                      | -                                                      | 861 915         | 1059 698     | 662    |
| 575                                        | 4.369991431                                            | 3.744016665     | 4.552826884  |        |
| 3.132126978                                | 2.677313996                                            | 2.491131204     |              |        |
| ENSG00000111911                            | 841.1111382                                            | 750.8304241     | 496.7215954  |        |
| 1105.036044                                | 1391.808593                                            | 1012.614416     | 696.2210526  |        |
| 1169.819685                                | -0.749546173                                           | 0.000417129     | 0.00530062   | HINT3  |
| 6                                          | 125956781                                              | 125980244       | + 3314       |        |
| protein_coding                             | histidine triad nucleotide binding protein 3           |                 |              |        |
| [Source:HGNC Symbol;Acc:HGNC:18468]        |                                                        | -               | 727 810      | 508    |
| 1100                                       | 1523 1032                                              | 11.99710941     | 10.77622059  |        |
| 7.100904371                                | 16.04875686                                            | 20.02654344     | 14.53694774  |        |
| ENSG00000164683                            | 223.2936034                                            | 246.5690035     | 263.0277739  |        |
| 74.33878843                                | 148.95916                                              | 111.8585692     | 244.2967936  |        |
| 111.7188392                                | 1.127479249                                            | 0.000418202     | 0.005308119  | HEY1   |
| 8                                          | 79764010                                               | 79767863        | - 3232       |        |
| protein_coding                             | hes related family bHLH transcription factor with YRPW |                 |              |        |
| motif 1 [Source:HGNC Symbol;Acc:HGNC:4880] |                                                        |                 | bHLH 193 266 |        |
| 269                                        | 74 163                                                 | 114 3.265732961 | 3.628642998  |        |
| 3.855523759                                | 1.107035592                                            | 2.197732599     | 1.646567485  |        |
| ENSG00000165996                            | 279.9847255                                            | 413.4202088     | 416.5421253  |        |
| 189.865284                                 | 216.5847909                                            | 191.3370263     | 369.9823532  |        |
| 199.2623671                                | 0.893848073                                            | 0.000418413     | 0.005308119  | HACD1  |

|                         |                                                     |             |             |             |       |
|-------------------------|-----------------------------------------------------|-------------|-------------|-------------|-------|
| 10                      | 17589032                                            | 17617377    | -           | 3857        |       |
| protein_coding          | 3-hydroxyacyl-CoA dehydratase 1 [Source:HGNC        |             |             |             |       |
| Symbol;Acc:HGNC:9639]   | -                                                   | 242         | 446         | 426         | 189   |
| 195                     | 3.431313823                                         | 5.098227108 | 5.116375564 |             | 237   |
| 2.369263598             | 2.677671554                                         | 2.360103279 |             |             |       |
| ENSG00000112531         | 4685.694787                                         | 3755.079072 | 4299.379636 |             |       |
| 3197.572481             | 3068.741468                                         | 2921.078601 | 4246.717831 |             |       |
| 3062.464184             | 0.471450864                                         | 0.000420582 | 0.005331208 |             | QKI   |
| 6                       | 163414000                                           | 163578596   | +           | 17368       |       |
| protein_coding          | "QKI, KH domain containing RNA binding [Source:HGNC |             |             |             |       |
| Symbol;Acc:HGNC:21100]" | -                                                   | 4050        | 4051        | 4397        | 3183  |
| 2977                    | 12.75263488                                         | 10.28362877 | 11.72759909 |             | 3358  |
| 8.861108303             | 8.425379644                                         | 8.001567257 |             |             |       |
| ENSG00000162391         | 9.255693406                                         | 7.415609127 | 6.844588913 |             |       |
| 31.14192488             | 66.71177105                                         | 40.2298363  | 7.838630482 |             |       |
| 46.02784408             | -2.559921949                                        | 0.000421289 | 0.005335743 |             |       |
| FAM151A 1               | 54609182                                            | 54623556    | -           | 2005        |       |
| protein_coding          | family with sequence similarity 151 member A        |             |             |             |       |
| [Source:HGNC            | Symbol;Acc:HGNC:25032]                              | -           | 8           | 8           | 7     |
| 31                      | 73                                                  | 41          | 0.218207826 | 0.175917712 |       |
| 0.161728336             | 0.747564265                                         | 1.586598652 | 0.954587    |             |       |
| ENSG00000052802         | 2097.571518                                         | 1667.585102 | 1767.859536 |             |       |
| 1061.839181             | 1456.692645                                         | 1135.266356 | 1844.338719 |             |       |
| 1217.932727             | 0.597989576                                         | 0.000421803 | 0.005337828 |             | MSM01 |
| 4                       | 165327623                                           | 165343160   | +           | 2892        |       |
| protein_coding          | methylsterol monooxygenase 1 [Source:HGNC           |             |             |             |       |
| Symbol;Acc:HGNC:10545]  | -                                                   | 1813        | 1799        | 1808        | 1057  |
| 1157                    | 34.28421644                                         | 27.4262754  | 28.96026912 |             | 1594  |
| 17.67168311             | 24.0186518                                          | 18.67588135 |             |             |       |
| ENSG00000057704         | 19.66834849                                         | 64.88657986 | 29.33395248 |             |       |
| 132.6043253             | 105.0938859                                         | 134.4265262 | 37.96296028 |             |       |
| 124.0415791             | -1.699215091                                        | 0.000423415 | 0.005353805 |             | TMCC3 |
| 12                      | 94567124                                            | 94650562    | -           | 6515        |       |
| protein_coding          | transmembrane and coiled-coil domain family 3       |             |             |             |       |
| [Source:HGNC            | Symbol;Acc:HGNC:29199]                              | -           | 17          | 70          | 30    |
| 132                     | 115                                                 | 137         | 0.142701722 | 0.473715481 |       |
| 0.213309054             | 0.979626958                                         | 0.769204857 | 0.981639856 |             |       |
| ENSG00000006652         | 1830.313371                                         | 1683.343272 | 1573.277652 |             |       |
| 1137.182547             | 1186.190121                                         | 1253.012218 | 1695.644765 |             |       |
| 1192.128296             | 0.507997262                                         | 0.000426582 | 0.005389384 |             | IFRD1 |
| 7                       | 112422968                                           | 112481017   | +           | 7489        |       |
| protein_coding          | interferon related developmental regulator 1        |             |             |             |       |
| [Source:HGNC            | Symbol;Acc:HGNC:5456]                               | -           | 1582        | 1816        | 1609  |
| 1132                    | 1298                                                | 1277        | 11.55253682 | 10.69118812 |       |
| 9.952556903             | 7.308425307                                         | 7.552825652 | 7.960000637 |             |       |
| ENSG00000204592         | 3583.11031                                          | 4170.353183 | 3938.57202  |             |       |
| 4687.361984             | 6036.04449                                          | 5700.862168 | 3897.345171 |             |       |
| 5474.756214             | -0.490209406                                        | 0.00042825  | 0.005405994 |             | HLA-E |
| 6                       | 30489467                                            | 30494205    | +           | 2975        |       |
| protein_coding          | "major histocompatibility complex, class I, E       |             |             |             |       |

|                                     |                                                 |             |             |        |
|-------------------------------------|-------------------------------------------------|-------------|-------------|--------|
| [Source:HGNC Symbol;Acc:HGNC:4962]" | -                                               | 3097        | 4499        | 4028   |
| 4666                                | 6605 5810                                       | 56.93101779 | 66.67499335 |        |
| 62.71984084                         | 75.83312984                                     | 96.74854661 | 91.1664824  |        |
| ENSG00000171813                     | 168.9164047                                     | 215.0526647 | 217.0712484 |        |
| 324.4787657                         | 484.345735                                      | 327.7259835 | 200.3467726 |        |
| 378.8501614                         | -0.918209299                                    | 0.000431045 | 0.005436789 | PWWP2B |
| 10                                  | 132397168                                       | 132417863   | + 2651      |        |
| protein_coding                      | PWWP domain containing 2B [Source:HGNC          |             |             |        |
| Symbol;Acc:HGNC:25150]              | -                                               | 146 232     | 222 323     | 530    |
| 334                                 | 3.011881222                                     | 3.858444122 | 3.879231543 |        |
| 5.891067665                         | 8.712137872                                     | 5.881427866 |             |        |
| ENSG00000106211                     | 5758.19826                                      | 7933.774815 | 6913.034802 |        |
| 10700.76722                         | 8879.976429                                     | 9734.639169 | 6868.335959 |        |
| 9771.794273                         | -0.508464467                                    | 0.000432484 | 0.00545044  | HSPB1  |
| 7                                   | 76302544                                        | 76304295    | + 1634      |        |
| protein_coding                      | heat shock protein family B (small) member 1    |             |             |        |
| [Source:HGNC Symbol;Acc:HGNC:5246]  | -                                               | 4977 8559   |             | 7070   |
| 10652                               | 9717 9921                                       | 166.5751839 | 230.9430686 |        |
| 200.4332725                         | 315.1957276                                     | 259.1425621 | 283.4323602 |        |
| ENSG00000072864                     | 738.1415491                                     | 735.9992058 | 1232.026004 |        |
| 518.3623626                         | 577.5594425                                     | 472.9458804 | 902.0555864 |        |
| 522.9558952                         | 0.786687986                                     | 0.000436011 | 0.005490366 | NDE1   |
| 16                                  | 15643267                                        | 15726353    | + 5512      |        |
| protein_coding                      | nudE neurodevelopment protein 1 [Source:HGNC    |             |             |        |
| Symbol;Acc:HGNC:17619]              | -                                               | 638 794     | 1260 516    | 632    |
| 482                                 | 6.330036038                                     | 6.351045901 | 10.58921563 |        |
| 4.526283053                         | 4.99650662                                      | 4.082102121 |             |        |
| ENSG00000138092                     | 537.9871792                                     | 466.2564238 | 736.2822074 |        |
| 311.4192488                         | 290.607441                                      | 384.6364836 | 580.1752701 |        |
| 328.8877245                         | 0.819200328                                     | 0.000438759 | 0.005519219 | CENPO  |
| 2                                   | 24793136                                        | 24822376    | + 5518      |        |
| protein_coding                      | centromere protein 0 [Source:HGNC               |             |             |        |
| Symbol;Acc:HGNC:28152]              | -                                               | 465 503     | 753 310     | 318    |
| 392                                 | 4.608567677                                     | 4.019020736 | 6.321435861 |        |
| 2.716321769                         | 2.51133137                                      | 3.316274005 |             |        |
| ENSG00000145632                     | 225.6075268                                     | 780.4928606 | 693.2590771 |        |
| 154.7050462                         | 84.07510872                                     | 165.8254228 | 566.4531548 |        |
| 134.8685259                         | 2.071242572                                     | 0.000439231 | 0.005519219 | PLK2   |
| 5                                   | 58453982                                        | 58460260    | - 4768      |        |
| protein_coding                      | polo like kinase 2 [Source:HGNC                 |             |             |        |
| Symbol;Acc:HGNC:19699]              | -                                               | 195 842     | 709 154     | 92 169 |
| 2.236624498                         | 7.785917592                                     | 6.888306201 | 1.561657138 |        |
| 0.840833833                         | 1.654613234                                     |             |             |        |
| ENSG00000186577                     | 842.2680999                                     | 1517.419018 | 875.1295825 |        |
| 1674.631896                         | 1952.004698                                     | 1770.112797 | 1078.272233 |        |
| 1798.916464                         | -0.737633516                                    | 0.000439386 | 0.005519219 | SMIM29 |
| 6                                   | 34246380                                        | 34249470    | - 2229      |        |
| protein_coding                      | small integral membrane protein 29 [Source:HGNC |             |             |        |
| Symbol;Acc:HGNC:1340]               | -                                               | 728 1637    | 895 1667    | 2136   |
| 1804                                | 17.86142168                                     | 32.37968123 | 18.60010615 |        |

|                                              |                                                 |                     |              |             |                |             |
|----------------------------------------------|-------------------------------------------------|---------------------|--------------|-------------|----------------|-------------|
| 36.15986062                                  | 41.75896995                                     | 37.78091751         |              |             |                |             |
| ENSG00000125726                              | 131.893631                                      | 126.9923063         | 250.3163945  |             |                |             |
| 15.06867333                                  | 79.50580934                                     | 53.96685357         | 169.7341106  |             |                |             |
| 49.51377875                                  | 1.774903054                                     | 0.00044278          | 0.00555729   | CD70        |                |             |
| 19                                           | 6583183                                         | 6604103             | -            | 1532        | protein_coding | CD70        |
| molecule [Source:HGNC Symbol;Acc:HGNC:11937] |                                                 |                     | -            | 114         |                | 137         |
| 256                                          | 15                                              | 87                  | 55           | 4.06949762  | 3.942718402    |             |
| 7.74076095                                   | 0.473405948                                     | 2.474680209         | 1.675907174  |             |                |             |
| ENSG00000115526                              | 414.1922799                                     | 448.6443522         | 607.2128164  |             |                |             |
| 837.8182372                                  | 815.1630107                                     | 734.9304241         | 490.0164828  |             |                |             |
| 795.9705573                                  | -0.699108465                                    | 0.000444089         | 0.005569151  | CHST10      |                |             |
| 2                                            | 100391860                                       | 100417656           | -            | 4487        |                |             |
| protein_coding                               | carbohydrate                                    | sulfotransferase 10 | [Source:HGNC |             |                |             |
| Symbol;Acc:HGNC:19650]                       | -                                               | 358                 | 484          | 621         | 834            | 892         |
| 749                                          | 4.363366268                                     | 4.755796359         | 6.411180239  |             |                |             |
| 8.986926661                                  | 8.662981413                                     | 7.792409803         |              |             |                |             |
| ENSG00000035403                              | 6529.891698                                     | 5947.31852          | 6172.841401  |             |                |             |
| 4600.968257                                  | 4259.500889                                     | 4961.025666         | 6216.683873  |             |                |             |
| 4607.164937                                  | 0.432234427                                     | 0.000446044         | 0.005588502  | VCL         |                |             |
| 10                                           | 73995193                                        | 74121363            | +            | 9992        |                |             |
| protein_coding                               | vinculin [Source:HGNC Symbol;Acc:HGNC:12665]    |                     |              | -           |                |             |
| 5644                                         | 6416                                            | 6313                | 4580         | 4661        | 5056           | 30.89080973 |
| 28.31039233                                  | 29.26751299                                     | 22.16227141         | 20.32756111  |             |                |             |
| 23.62113032                                  |                                                 |                     |              |             |                |             |
| ENSG00000189241                              | 1035.4807                                       | 1128.099538         | 1042.333112  |             |                |             |
| 1386.317946                                  | 1580.977588                                     | 1638.629918         | 1068.637783  |             |                |             |
| 1535.308484                                  | -0.522606573                                    | 0.000446364         | 0.005588502  | TSPYL1      |                |             |
| 6                                            | 116276578                                       | 116279903           | -            | 3326        |                |             |
| protein_coding                               | TSPY like 1 [Source:HGNC Symbol;Acc:HGNC:12382] |                     |              | -           |                |             |
| 895                                          | 1217                                            | 1066                | 1380         | 1730        | 1670           | 14.71619396 |
| 16.13252294                                  | 14.8469558                                      | 20.06125314         | 22.66639517  |             |                |             |
| 23.43906385                                  |                                                 |                     |              |             |                |             |
| ENSG00000259518                              | 118.0100909                                     | 63.03267758         | 80.17947013  |             |                |             |
| 13.05951689                                  | 11.88017841                                     | 38.26740526         | 87.07407954  |             |                |             |
| 21.06903352                                  | 2.04704933                                      | 0.000449054         | 0.005617585  |             |                |             |
| LINC01583                                    | 15                                              | 82088594            | 82097694     | +           |                | 2568        |
| lincRNA                                      | long intergenic non-protein coding RNA          | 1583                |              |             |                |             |
| [Source:HGNC Symbol;Acc:HGNC:51425]          |                                                 | -                   | 102          | 68          |                | 82          |
| 13                                           | 13                                              | 39                  | 2.172200279  | 1.167475704 |                |             |
| 1.479180895                                  | 0.244765131                                     | 0.220600723         | 0.708950027  |             |                |             |
| ENSG00000082512                              | 441.9593601                                     | 312.3825345         | 396.0083585  |             |                |             |
| 203.9293791                                  | 220.2402305                                     | 218.8110608         | 383.4500844  |             |                |             |
| 214.3268901                                  | 0.837919609                                     | 0.000450229         | 0.005627674  | TRAF5       |                |             |
| 1                                            | 211326615                                       | 211374946           | +            | 9022        |                |             |
| protein_coding                               | TNF receptor associated factor 5 [Source:HGNC   |                     |              |             |                |             |
| Symbol;Acc:HGNC:12035]                       | -                                               | 382                 | 337          | 405         | 203            | 241         |
| 223                                          | 2.31555581                                      | 1.646876514         | 2.079479562  |             |                |             |
| 1.087913664                                  | 1.164053169                                     | 1.153846604         |              |             |                |             |
| ENSG00000146556                              | 123.7948993                                     | 206.7101044         | 137.8695767  |             |                |             |
| 375.712255                                   | 233.9481286                                     | 365.0121732         | 156.1248601  |             |                |             |

|                                                                                                                             |              |                |                            |                         |
|-----------------------------------------------------------------------------------------------------------------------------|--------------|----------------|----------------------------|-------------------------|
| 324.8908523                                                                                                                 | -1.054273714 | 0.000453456    | 0.005659441                | WASH2P                  |
| 2                                                                                                                           | 113588550    | 113599043      | + 2958                     |                         |
| transcribed_unprocessed_pseudogene "WAS protein family homolog 2, pseudogene [Source:HGNC Symbol;Acc:HGNC:33145]" - 107 223 |              |                |                            |                         |
| 141                                                                                                                         | 374          | 256            | 372                        | 1.978246112 3.323844144 |
|                                                                                                                             | 2.208123698  | 6.113285085    | 3.771380866                | 5.870712411             |
| ENSG00000111859                                                                                                             | 299.653074   | 237.2994921    | 412.6309316                |                         |
| 56.25638043                                                                                                                 | 165.4086378  | 161.9005607    | 316.5278326                |                         |
| 127.855193                                                                                                                  | 1.306562075  | 0.00045351     | 0.005659441                | NEDD9                   |
| 6                                                                                                                           | 11183298     | 11382348       | - 10359                    |                         |
| protein_coding "neural precursor cell expressed, developmentally down-regulated 9 [Source:HGNC Symbol;Acc:HGNC:7733]" - 259 |              |                |                            |                         |
| 256                                                                                                                         | 422          | 56             | 181 165                    | 1.367340393             |
| 1.089572392                                                                                                                 | 1.887109382  | 0.261379432    | 0.761411338                |                         |
| 0.743553371                                                                                                                 |              |                |                            |                         |
| ENSG00000164733                                                                                                             | 56603.19302  | 61977.80718    | 44486.89454                |                         |
| 68955.25374                                                                                                                 | 86208.05768  | 76966.54535    | 54355.96491                |                         |
| 77376.61892                                                                                                                 | -0.509463816 | 0.000458142    | 0.00571258                 | CTSB                    |
| 8                                                                                                                           | 11842524     | 11869448       | - 7428                     |                         |
| protein_coding cathepsin B [Source:HGNC Symbol;Acc:HGNC:2527] -                                                             |              |                |                            |                         |
| 48924                                                                                                                       | 66862        | 45497          | 68641 94334                | 78440 360.2008847       |
|                                                                                                                             | 396.8637449  | 283.7352681    | 446.799752                 | 553.4201308             |
|                                                                                                                             | 492.9600508  |                |                            |                         |
| ENSG00000147155                                                                                                             | 576.1669145  | 609.9338507    | 620.9019943                |                         |
| 313.4284053                                                                                                                 | 356.4053522  | 434.6784751    | 602.3342531                |                         |
| 368.1707442                                                                                                                 | 0.710362238  | 0.00046176     | 0.005753                   | EBP                     |
| X                                                                                                                           | 48521158     | 48528716       | + 2409                     |                         |
| protein_coding "EBP, cholesterol delta-isomerase [Source:HGNC Symbol;Acc:HGNC:3133]" - 498 658 635 312 390                  |              |                |                            |                         |
| 443                                                                                                                         | 11.30543443  | 12.04267737    | 12.21066682                |                         |
| 6.262085752                                                                                                                 | 7.054827592  | 8.584459619    |                            |                         |
| ENSG00000129009                                                                                                             | 16.19746346  | 2.780853423    | 27.37835565                | 0                       |
| 0                                                                                                                           | 0            | 15.45222418    | 0                          | 6.441584599             |
| 0.000465433                                                                                                                 | 1            | ISLR           | 15                         | 74173671 74176872       |
| +                                                                                                                           | 2671         | protein_coding | immunoglobulin superfamily |                         |
| containing leucine rich repeat [Source:HGNC Symbol;Acc:HGNC:6133]                                                           |              |                |                            |                         |
| -                                                                                                                           | 14           | 3              | 28                         | 0 0 0                   |
| 0.286647963                                                                                                                 | 0.049520079  | 0.485608857    | 0                          | 0 0                     |
| ENSG00000158164                                                                                                             | 130.7366694  | 71.37523785    | 66.4902923                 |                         |
| 29.13276844                                                                                                                 | 30.15737595  | 12.75580175    | 89.5340665                 |                         |
| 24.01531538                                                                                                                 | 1.894857783  | 0.000470209    | 0.005853484                |                         |
| TMSB15A X                                                                                                                   | 102513676    | 102516784      | - 685                      |                         |
| protein_coding thymosin beta 15a [Source:HGNC Symbol;Acc:HGNC:30744]                                                        |              |                |                            |                         |
| -                                                                                                                           | 113          | 77             | 68 29                      | 33 13                   |
| 9.021579587                                                                                                                 | 4.956032112  | 4.598548773    | 2.046956638                |                         |
| 2.099336062                                                                                                                 | 0.885928793  |                |                            |                         |
| ENSG00000158270                                                                                                             | 164.288558   | 57.47097073    | 170.1369244                |                         |
| 40.18312888                                                                                                                 | 36.5543951   | 47.09834493    | 130.632151                 |                         |
| 41.27862297                                                                                                                 | 1.660752192  | 0.000470927    | 0.005857652                |                         |
| COLEC12 18                                                                                                                  | 316740       | 500722         | - 7340                     | protein_coding          |

|                                                                   |                                       |             |                                     |             |             |             |
|-------------------------------------------------------------------|---------------------------------------|-------------|-------------------------------------|-------------|-------------|-------------|
| collectin subfamily member 12 [Source:HGNC Symbol;Acc:HGNC:16016] |                                       |             |                                     |             |             |             |
| -                                                                 | 142                                   | 62          | 174                                 | 40          | 40          | 48          |
| 1.058003239                                                       | 0.372417077                           |             | 1.098134774                         |             | 0.263490613 |             |
| 0.237477533                                                       | 0.305274981                           |             |                                     |             |             |             |
| ENSG00000145730                                                   | 2511.763798                           |             | 1863.171793                         |             | 2246.98076  |             |
| 1163.301581                                                       | 1436.587727                           |             | 1717.127159                         |             | 2207.30545  |             |
| 1439.005489                                                       | 0.616831496                           |             | 0.000475335                         |             | 0.005907681 | PAM         |
| 5                                                                 | 102753981                             |             | 103031105                           |             | + 8846      |             |
| protein_coding                                                    | peptidylglycine alpha-amidating       |             | monooxygenase                       |             |             |             |
| [Source:HGNC Symbol;Acc:HGNC:8596]                                | -                                     |             | 2171                                |             | 2010        | 2298        |
| 1158                                                              | 1572                                  | 1750        | 13.42170228                         |             | 10.01804736 |             |
| 12.03387636                                                       | 6.329404345                           |             | 7.743979674                         |             | 9.23500531  |             |
| ENSG00000197702                                                   | 3739.300136                           |             | 2686.304406                         |             | 3587.542389 |             |
| 2339.662679                                                       | 2369.638662                           |             | 2217.547074                         |             | 3337.715644 |             |
| 2308.949472                                                       | 0.531333726                           |             | 0.00048298                          |             | 0.005997818 | PARVA       |
| 11                                                                | 12377185                              |             | 12535356                            |             | + 12849     |             |
| protein_coding                                                    | parvin alpha                          |             | [Source:HGNC Symbol;Acc:HGNC:14652] |             |             |             |
| -                                                                 | 3232                                  | 2898        | 3669                                | 2329        | 2593        | 2260        |
| 13.75614471                                                       | 9.944043375                           |             | 13.22759345                         |             | 8.763979962 |             |
| 8.794107808                                                       | 8.210793803                           |             |                                     |             |             |             |
| ENSG00000182492                                                   | 9080.992193                           |             | 5278.059796                         |             | 16048.6054  |             |
| 3186.52212                                                        | 2238.04284                            |             | 3759.036655                         |             | 10135.8858  |             |
| 3061.200538                                                       | 1.727316074                           |             | 0.000483836                         |             | 0.006003572 | BGN         |
| X                                                                 | 153494939                             |             | 153509554                           |             | + 2453      |             |
| protein_coding                                                    | biglycan                              |             | [Source:HGNC Symbol;Acc:HGNC:1044]  |             |             | -           |
| 7849                                                              | 5694                                  | 16413       | 3172                                | 2449        | 3831        | 174.9892999 |
| 102.3419936                                                       |                                       | 309.9508824 |                                     | 62.52257367 |             | 43.50606803 |
| 72.90555822                                                       |                                       |             |                                     |             |             |             |
| ENSG00000165805                                                   | 16.19746346                           |             | 24.10072966                         |             | 9.777984162 |             |
| 37.16939421                                                       | 119.7156439                           |             | 69.66630188                         |             | 16.69205909 |             |
| 75.51711335                                                       | -2.17623792                           |             | 0.000486738                         |             | 0.006034689 |             |
| C12orf50                                                          | 12                                    | 87980035    |                                     | 88034037    |             | - 5609      |
| protein_coding                                                    | chromosome 12 open reading frame 50   |             |                                     |             |             |             |
| [Source:HGNC Symbol;Acc:HGNC:26665]                               | -                                     |             | 14                                  |             | 26          | 10          |
| 37                                                                | 131                                   | 71          | 0.136501464                         |             | 0.204372222 |             |
| 0.082588013                                                       | 0.31894625                            |             | 1.017757833                         |             | 0.590906741 |             |
| ENSG00000179041                                                   | 1682.222276                           |             | 2198.728106                         |             | 1992.753172 |             |
| 3114.192488                                                       | 2602.672931                           |             | 2727.779144                         |             | 1957.901185 |             |
| 2814.881521                                                       | -0.523213218                          |             | 0.000488189                         |             | 0.006047764 | RRS1        |
| 8                                                                 | 66429028                              |             | 66430733                            |             | + 1706      |             |
| protein_coding                                                    | ribosome biogenesis regulator homolog |             | [Source:HGNC                        |             |             |             |
| Symbol;Acc:HGNC:17083]                                            | -                                     |             | 1454                                | 2372        | 2038        | 3100 2848   |
| 2780                                                              | 46.6101062                            |             | 61.3012903                          |             | 55.33852875 |             |
| 87.85852006                                                       | 72.74774836                           |             | 76.06971776                         |             |             |             |
| ENSG00000147274                                                   | 8754.729                              |             | 7362.772912                         |             | 8198.83972  |             |
| 5947.103074                                                       | 6050.666248                           |             | 6152.221307                         |             | 8105.44721  |             |
| 6049.996877                                                       | 0.421847236                           |             | 0.000490318                         |             | 0.006069222 | RBMX        |
| X                                                                 | 136848004                             |             | 136880764                           |             | - 5882      |             |
| protein_coding                                                    | RNA binding motif protein X-linked    |             | [Source:HGNC                        |             |             |             |
| Symbol;Acc:HGNC:9910]                                             | -                                     |             | 7567                                | 7943        | 8385        | 5920 6621   |

|                                               |                                                        |                        |                |        |
|-----------------------------------------------|--------------------------------------------------------|------------------------|----------------|--------|
| 6270                                          | 70.35475039                                            | 59.53789836            | 66.03596103    |        |
| 48.66289064                                   | 49.05205036                                            | 49.7609378             |                |        |
| ENSG00000198858                               | 1086.387013                                            | 1719.494366            | 1647.590331    |        |
| 2342.676414                                   | 2062.581743                                            | 2495.231066            | 1484.49057     |        |
| 2300.163074                                   | -0.630939774                                           | 0.000493235            | 0.006100385    | R3HDM4 |
| 19                                            | 896503 913245                                          | - 2957                 | protein_coding | R3H    |
| domain containing 4 [Source:HGNC              | Symbol;Acc:HGNC:28270]                                 | -                      |                | 939    |
| 1855                                          | 1685 2332                                              | 2257 2543              | 17.36636723    |        |
| 27.65836779                                   | 26.39678508                                            | 38.13102134            | 33.26127035    |        |
| 40.14588826                                   |                                                        |                        |                |        |
| ENSG00000123689                               | 276.5138405                                            | 488.5032512            | 613.0796069    |        |
| 204.9339573                                   | 223.89567                                              | 262.9657592            | 459.3655662    |        |
| 230.5984622                                   | 0.995578003                                            | 0.000498925            | 0.006165777    | G0S2   |
| 1                                             | 209675420                                              | 209676388              | + 866          |        |
| protein_coding                                | G0/G1 switch 2 [Source:HGNC                            | Symbol;Acc:HGNC:30229] |                |        |
| -                                             | 239 527                                                | 627 204                | 245 268        |        |
| 15.09297045                                   | 26.8303712                                             | 33.53915407            | 11.38973165    |        |
| 12.32840208                                   | 14.44650984                                            |                        |                |        |
| ENSG00000138600                               | 2059.391783                                            | 1641.63047             | 1850.972402    |        |
| 1215.539649                                   | 1310.475064                                            | 1348.190124            | 1850.664885    |        |
| 1291.401612                                   | 0.518627547                                            | 0.00050061             | 0.006181597    | SPPL2A |
| 15                                            | 50702266                                               | 50765808               | - 8144         |        |
| protein_coding                                | signal peptide peptidase like 2A [Source:HGNC          | Symbol;Acc:HGNC:30227] | -              | 1434   |
| 1374                                          | 11.95300084                                            | 9.587707014            | 10.76751052    |        |
| 7.183710494                                   | 7.673084556                                            | 7.875805885            |                |        |
| ENSG00000102794                               | 18.51138681                                            | 39.85889906            | 8.800185745    |        |
| 66.30216265                                   | 206.5323323                                            | 48.07956045            | 22.3901572     |        |
| 106.9713518                                   | -2.252677956                                           | 0.0005011              | 0.006182663    | ACOD1  |
| 13                                            | 76948497                                               | 76958642               | + 2177         |        |
| protein_coding                                | aconitate decarboxylase 1 [Source:HGNC                 | Symbol;Acc:HGNC:33904] | -              | 226    |
| 49                                            | 0.401935408                                            | 0.87085126             | 0.19150783     |        |
| 1.465840521                                   | 4.523854287                                            | 1.050711987            |                |        |
| ENSG00000136213                               | 631.7010749                                            | 813.8631017            | 865.3515983    |        |
| 1113.07267                                    | 1168.826783                                            | 1222.594537            | 770.3052583    |        |
| 1168.164663                                   | -0.599757394                                           | 0.00050253             | 0.006195302    | CHST12 |
| 7                                             | 2403560 2448483                                        | + 16143                | protein_coding |        |
| carbohydrate sulfotransferase 12 [Source:HGNC | Symbol;Acc:HGNC:17423]                                 |                        |                |        |
| -                                             | 546 878                                                | 885 1108               | 1279 1246      |        |
| 1.849707718                                   | 2.397972659                                            | 2.539577553            | 3.318613917    |        |
| 3.452589103                                   | 3.603129168                                            |                        |                |        |
| ENSG00000108846                               | 134.2075544                                            | 146.4582803            | 286.4949359    |        |
| 20.09156444                                   | 101.4384464                                            | 49.06077597            | 189.0535902    |        |
| 56.8635956                                    | 1.730696686                                            | 0.000503427            | 0.006201359    | ABCC3  |
| 17                                            | 50634777                                               | 50692252               | + 9614         |        |
| protein_coding                                | ATP binding cassette subfamily C member 3 [Source:HGNC | Symbol;Acc:HGNC:54]    | -              | 111    |
| 50                                            | 0.65985511                                             | 0.724580976            | 1.411776532    |        |
| 0.100583581                                   | 0.503126808                                            | 0.24277945             |                |        |



|                        |                                                     |                                         |             |             |
|------------------------|-----------------------------------------------------|-----------------------------------------|-------------|-------------|
| ENSG00000110104        | 1749.326054                                         | 2422.123331                             | 2235.247179 |             |
| 3421.593424            | 2778.134027                                         | 3166.382481                             | 2135.565521 |             |
| 3122.036644            | -0.547294413                                        | 0.000508044                             | 0.006253191 | CCDC86      |
| 11                     | 60842071                                            | 60851081                                | + 3384      |             |
| protein_coding         | coiled-coil domain containing 86 [Source:HGNC       |                                         |             |             |
| Symbol;Acc:HGNC:28359] | -                                                   | 1512 2613                               | 2286 3406   | 3040        |
| 3227                   | 24.43521415                                         | 34.0441906                              | 31.29308123 |             |
| 48.66486307            | 39.14730117                                         | 44.51584759                             |             |             |
| ENSG00000255112        | 944.0807274                                         | 824.0595642                             | 746.0601915 |             |
| 1615.361781            | 1322.355243                                         | 1037.144804                             | 838.0668277 |             |
| 1324.953943            | -0.661241967                                        | 0.000511683                             | 0.00629292  | CHMP1B      |
| 18                     | 11851396                                            | 11854449                                | + 3054      |             |
| protein_coding         | charged multivesicular body protein 1B [Source:HGNC |                                         |             |             |
| Symbol;Acc:HGNC:24287] | -                                                   | 816 889                                 | 763 1608    | 1447        |
| 1057                   | 14.61220777                                         | 12.83413745                             | 11.57331999 |             |
| 25.45764512            | 20.64705412                                         | 16.15667505                             |             |             |
| ENSG00000111275        | 1.156961676                                         | 12.97731597                             | 35.20074298 | 0           |
| 0                      | 0                                                   | 16.44500688                             | 0           | 6.535346575 |
| 0.000513251            | 1                                                   | ALDH2                                   | 12          | 111766887   |
| +                      | 9720                                                | protein_coding aldehyde dehydrogenase 2 |             | 111817529   |
| family member          | [Source:HGNC Symbol;Acc:HGNC:404] -                 |                                         |             | 1 14        |
| 36                     | 0                                                   | 0                                       | 0           | 0.005626372 |
| 0.171568949            | 0                                                   | 0                                       | 0           | 0.063503217 |
| ENSG00000078098        | 747.3972425                                         | 593.2487301                             | 656.1027372 |             |
| 485.2112812            | 319.8509571                                         | 388.5613457                             | 665.5829033 |             |
| 397.874528             | 0.742357855                                         | 0.000513577                             | 0.006311138 | FAP         |
| 2                      | 162170684                                           | 162245151                               | - 7003      |             |
| protein_coding         | fibroblast activation protein alpha [Source:HGNC    |                                         |             |             |
| Symbol;Acc:HGNC:3590]  | -                                                   | 646 640                                 | 671 483     | 350         |
| 396                    | 5.044790138                                         | 4.029301872                             | 4.438547272 |             |
| 3.334757215            | 2.177922972                                         | 2.639715335                             |             |             |
| ENSG00000187994        | 19.66834849                                         | 45.4206059                              | 21.51156516 |             |
| 115.5264955            | 73.10879019                                         | 104.9900606                             | 28.86683985 |             |
| 97.87511544            | -1.753683009                                        | 0.000517433                             | 0.006349054 | RINL        |
| 19                     | 38867834                                            | 38878279                                | - 4201      |             |
| protein_coding         | Ras and Rab interactor like [Source:HGNC            |                                         |             |             |
| Symbol;Acc:HGNC:24795] | -                                                   | 17 49                                   | 22 115      | 80          |
| 107                    | 0.221304861                                         | 0.514253619                             | 0.242589755 |             |
| 1.323568356            | 0.829842939                                         | 1.188987071                             |             |             |
| ENSG00000177119        | 2724.644746                                         | 2158.869207                             | 2295.870681 |             |
| 1688.695991            | 1777.457462                                         | 1592.512788                             | 2393.128211 |             |
| 1686.22208             | 0.504640991                                         | 0.000517493                             | 0.006349054 | AN06        |
| 12                     | 45215987                                            | 45440404                                | + 8235      |             |
| protein_coding         | anoctamin 6 [Source:HGNC Symbol;Acc:HGNC:25240] -   |                                         |             |             |
| 2355                   | 2329 2348                                           | 1681 1945                               | 1623        | 15.63946962 |
| 12.46923595            | 13.20799649                                         | 9.869731234                             | 10.29235127 |             |
| 9.200278037            |                                                     |                                         |             |             |
| ENSG00000167716        | 1249.51861                                          | 1494.245239                             | 1668.124098 |             |
| 2342.676414            | 1846.910812                                         | 2359.823324                             | 1470.629316 |             |
| 2183.13685             | -0.569367713                                        | 0.000519917                             | 0.006373678 | WDR81       |

|                                     |                                                   |          |             |          |                |        |
|-------------------------------------|---------------------------------------------------|----------|-------------|----------|----------------|--------|
| 17                                  | 1716523                                           | 1738599  | +           | 7913     | protein_coding | WD     |
| repeat domain 81                    | [Source:HGNC Symbol;Acc:HGNC:26600]               |          |             |          | -              | 1080   |
| 1612                                | 1706                                              | 2332     | 2021        | 2405     | 7.464097478    |        |
| 8.981685207                         | 9.987121121                                       |          | 14.24913814 |          | 11.12970737    |        |
| 14.18795985                         |                                                   |          |             |          |                |        |
| ENSG00000118557                     | 42.807582                                         |          | 44.49365476 |          | 42.04533189    |        |
| 2.009156444                         | 11.88017841                                       |          | 4.906077597 |          | 43.11552289    |        |
| 6.265137483                         | 2.77177966                                        |          | 0.000521526 |          | 0.006386107    | PMFBP1 |
| 16                                  | 72112157                                          |          | 72176878    |          | - 5691         |        |
| protein_coding                      | polyamine modulated factor 1 binding protein 1    |          |             |          |                |        |
| [Source:HGNC Symbol;Acc:HGNC:17728] |                                                   |          | -           | 37       | 48             | 43     |
| 2                                   | 13                                                | 5        | 0.355555869 |          | 0.371866118    |        |
| 0.35001151                          | 0.016991927                                       |          | 0.099543605 |          | 0.041013559    |        |
| ENSG00000130309                     | 6105.286763                                       |          | 6574.864442 |          | 7924.078365    |        |
| 4636.128495                         | 4826.094013                                       |          | 5329.962702 |          | 6868.076523    |        |
| 4930.728403                         | 0.478196121                                       |          | 0.000522229 |          | 0.006386107    |        |
| COLGALT1                            | 19                                                | 17555594 |             | 17583162 | +              | 4900   |
| protein_coding                      | collagen beta(1-0)galactosyltransferase 1         |          |             |          |                |        |
| [Source:HGNC Symbol;Acc:HGNC:26182] |                                                   |          | -           | 5277     | 7093           | 8104   |
| 4615                                | 5281                                              | 5432     | 58.89599007 |          | 63.82162206    |        |
| 76.6135891                          | 45.53830293                                       |          | 46.96547134 |          | 51.74992409    |        |
| ENSG00000177613                     | 1228.6933                                         |          | 1327.394034 |          | 1189.002874    |        |
| 1594.265638                         | 1806.700978                                       |          | 1939.863082 |          | 1248.363402    |        |
| 1780.276566                         | -0.511976005                                      |          | 0.000522386 |          | 0.006386107    | CSTF2T |
| 10                                  | 51695487                                          |          | 51699591    |          | - 4105         |        |
| protein_coding                      | cleavage stimulation factor subunit 2 tau variant |          |             |          |                |        |
| [Source:HGNC Symbol;Acc:HGNC:17086] |                                                   |          | -           | 1062     | 1432           | 1216   |
| 1587                                | 1977                                              | 1977     | 14.1483589  |          | 15.38026486    |        |
| 13.72217234                         | 18.69239638                                       |          | 20.98708423 |          | 22.48223814    |        |
| ENSG00000153044                     | 1219.437606                                       |          | 1222.648555 |          | 1067.75587     |        |
| 757.4519794                         | 898.3242595                                       |          | 613.2596997 |          | 1169.947344    |        |
| 756.3453129                         | 0.628898351                                       |          | 0.000522602 |          | 0.006386107    | CENPH  |
| 5                                   | 69189548                                          |          | 69210357    |          | + 2244         |        |
| protein_coding                      | centromere protein H [Source:HGNC                 |          |             |          |                |        |
| Symbol;Acc:HGNC:17268]              |                                                   |          | -           | 1054     | 1319           | 983    |
| 625                                 | 25.6869459                                        |          | 25.91527973 |          | 22.54250847    |        |
| 16.24612198                         | 19.08926746                                       |          | 13.0017916  |          |                |        |
| ENSG00000131153                     | 2951.409235                                       |          | 2308.108341 |          | 2642.01132     |        |
| 1788.149235                         | 1979.420494                                       |          | 1822.11722  |          | 2633.842965    |        |
| 1863.228983                         | 0.498932826                                       |          | 0.000523514 |          | 0.006392137    | GINS2  |
| 16                                  | 85676198                                          |          | 85690073    |          | - 3264         |        |
| protein_coding                      | GINS complex subunit 2 [Source:HGNC               |          |             |          |                |        |
| Symbol;Acc:HGNC:24575]              |                                                   |          | -           | 2551     | 2490           | 2166   |
| 1857                                | 42.74201784                                       |          | 33.63435897 |          | 38.34755247    |        |
| 26.36762835                         | 28.91790988                                       |          | 26.5587597  |          |                |        |
| ENSG00000249471                     | 336.6758476                                       |          | 351.3144824 |          | 333.4292599    |        |
| 552.5180221                         | 510.8476715                                       |          | 560.2740616 |          | 340.4731966    |        |
| 541.2132517                         | -0.668324051                                      |          | 0.000524779 |          | 0.006402471    |        |
| ZNF324B 19                          | 58451604                                          |          | 58457833    |          | + 4042         |        |
| protein_coding                      | zinc finger protein 324B [Source:HGNC             |          |             |          |                |        |

|                        |                                                |             |             |             |      |             |
|------------------------|------------------------------------------------|-------------|-------------|-------------|------|-------------|
| Symbol;Acc:HGNC:33107] | zf-C2H2                                        | 291         | 379         | 341         | 550  | 559         |
| 571                    | 3.937235503                                    | 4.134060793 | 3.908053727 |             |      |             |
| 6.579116804            | 6.026623996                                    | 6.594560166 |             |             |      |             |
| ENSG00000033327        | 201.3113316                                    | 221.5413227 | 228.8048294 |             |      |             |
| 406.8541799            | 318.0232373                                    | 425.8475354 | 217.2191612 |             |      |             |
| 383.5749842            | -0.819192258                                   | 0.000525865 | 0.006410608 |             |      | GAB2        |
| 11                     | 78215297                                       | 78418348    | -           | 6771        |      |             |
| protein_coding         | GRB2 associated binding protein 2 [Source:HGNC |             |             |             |      |             |
| Symbol;Acc:HGNC:14458] | -                                              | 174         | 239         | 234         | 405  | 348         |
| 434                    | 1.405371517                                    | 1.556248856 | 1.600904773 |             |      |             |
| 2.89203421             | 2.239675132                                    | 2.992147176 |             |             |      |             |
| ENSG00000163754        | 1298.111                                       | 1157.761975 | 1143.046348 |             |      |             |
| 856.9052234            | 829.7847687                                    | 803.6155104 | 1199.639775 |             |      |             |
| 830.1018342            | 0.530874032                                    | 0.000528157 | 0.00643341  |             |      | GYG1        |
| 3                      | 148991341                                      | 149027668   | +           | 3511        |      |             |
| protein_coding         | glycogenin 1 [Source:HGNC                      |             |             |             |      |             |
| Symbol;Acc:HGNC:4699]  | -                                              | 1122        | 1249        | 1169        | 853  | 908         |
| 1122                   | 1249                                           | 1169        | 853         | 908         | 819  | 17.4765917  |
| 15.68431539            | 15.42361363                                    | 11.74679577 | 11.26973274 |             |      |             |
| 10.88927857            |                                                |             |             |             |      |             |
| ENSG00000140262        | 3625.917892                                    | 2504.621983 | 2854.193577 |             |      |             |
| 2201.030884            | 2039.735246                                    | 1864.309487 | 2994.91115  |             |      |             |
| 2035.025206            | 0.557090327                                    | 0.000531932 | 0.006474236 |             |      | TCF12       |
| 15                     | 56918623                                       | 57299281    | +           | 9446        |      |             |
| protein_coding         | transcription factor 12 [Source:HGNC           |             |             |             |      |             |
| Symbol;Acc:HGNC:11623] | bHLH                                           | 3134        | 2702        | 2919        | 2191 | 2232        |
| 1900                   | 18.14453169                                    | 12.61163408 | 14.31490959 |             |      |             |
| 11.21490639            | 10.29686092                                    | 9.38969954  |             |             |      |             |
| ENSG00000044459        | 747.3972425                                    | 623.8381178 | 689.3478834 |             |      |             |
| 429.959479             | 479.7764356                                    | 406.2232251 | 686.8610812 |             |      |             |
| 438.6530466            | 0.6460668                                      | 0.000533787 | 0.006491648 |             |      | CNTLN       |
| 9                      | 17134982                                       | 17503923    | +           | 11064       |      |             |
| protein_coding         | centlein [Source:HGNC                          |             |             |             |      |             |
| Symbol;Acc:HGNC:23432] | -                                              | 646         | 673         | 705         | 428  | 525         |
| 646                    | 673                                            | 705         | 428         | 525         | 414  | 3.193118703 |
| 2.681864645            | 2.95174887                                     | 1.870392784 | 2.067786683 |             |      |             |
| 1.746763908            |                                                |             |             |             |      |             |
| ENSG00000118960        | 416.5062033                                    | 743.414815  | 590.5902434 |             |      |             |
| 1098.003997            | 865.4253039                                    | 980.2343039 | 583.5037539 |             |      |             |
| 981.2212015            | -0.748105473                                   | 0.000536222 | 0.006516075 |             |      | HS1BP3      |
| 2                      | 20560448                                       | 20651089    | -           | 9059        |      |             |
| protein_coding         | HCLS1 binding protein 3 [Source:HGNC           |             |             |             |      |             |
| Symbol;Acc:HGNC:24979] | -                                              | 999         | 2.173286358 | 3.903265263 | 604  | 1093        |
| 999                    | 2.173286358                                    | 3.903265263 | 3.088581991 |             |      | 947         |
| 5.833660067            | 4.555418877                                    | 5.147913779 |             |             |      |             |
| ENSG00000000460        | 873.5060652                                    | 736.926157  | 811.5726854 |             |      |             |
| 448.041887             | 591.2673407                                    | 510.2320701 | 807.3349692 |             |      |             |
| 516.5137659            | 0.643423202                                    | 0.000536961 | 0.006519875 |             |      |             |
| C1orf112               | 1                                              | 169662007   | 169854080   | +           |      | 5967        |
| protein_coding         | chromosome 1 open reading frame 112            |             |             |             |      |             |
| [Source:HGNC           | Symbol;Acc:HGNC:25565]                         | -           | 446         | 647         | 520  | 6.919673874 |
| 446                    | 647                                            | 520         | 6.919673874 | 5.874150223 |      | 830         |

|                                                 |                                                       |               |                |                |
|-------------------------------------------------|-------------------------------------------------------|---------------|----------------|----------------|
| 6.443539725                                     | 3.613932506                                           | 4.725054701   | 4.068116127    |                |
| ENSG00000116478                                 | 3617.81916                                            | 3616.963352   | 3858.39255     |                |
| 2372.81376                                      | 2801.894384                                           | 2885.754843   | 3697.725021    |                |
| 2686.820996                                     | 0.460687294                                           | 0.000538201   | 0.00652974     | HDAC1          |
| 1                                               | 32292086                                              | 32333635      | + 3963         |                |
| protein_coding                                  | histone deacetylase 1 [Source:HGNC                    |               |                |                |
| Symbol;Acc:HGNC:4852]                           | -                                                     | 3127 3902     | 3946 2362      | 3066           |
| 2941                                            | 43.15176079                                           | 43.41073616   | 46.12490284    |                |
| 28.81754881                                     | 33.71372003                                           | 34.64311919   |                |                |
| ENSG00000179562                                 | 591.2074163                                           | 671.112626    | 637.5245673    |                |
| 1087.958214                                     | 911.1182978                                           | 874.2630278   | 633.2815365    |                |
| 957.7798467                                     | -0.596172706                                          | 0.000540302   | 0.006550035    | GCC1           |
| 7                                               | 127580618                                             | 127593611     | - 4987         |                |
| protein_coding                                  | GRIP and coiled-coil domain containing 1 [Source:HGNC |               |                |                |
| Symbol;Acc:HGNC:19095]                          | -                                                     | 511 724       | 652 1083       | 997            |
| 891                                             | 5.603717649                                           | 6.400783766   | 6.056346067    |                |
| 10.50002432                                     | 8.711930213                                           | 8.340351836   |                |                |
| ENSG00000129245                                 | 1707.675433                                           | 2359.090653   | 2021.109326    |                |
| 2662.132288                                     | 2965.475302                                           | 3210.53718    | 2029.291804    |                |
| 2946.048257                                     | -0.537333928                                          | 0.000540972   | 0.006552957    | FXR2           |
| 17                                              | 7591230 7614871                                       | - 4331        | protein_coding | FMR1           |
| autosomal homolog 2 [Source:HGNC                | Symbol;Acc:HGNC:4024]                                 | -             |                | 1476           |
| 2545                                            | 2067 2650                                             | 3245 3272     | 18.63772445    |                |
| 25.90798046                                     | 22.10826943                                           | 29.58413712   | 32.65014506    |                |
| 35.26721351                                     |                                                       |               |                |                |
| ENSG00000213853                                 | 1233.321146                                           | 1212.452092   | 1477.453407    |                |
| 774.5298092                                     | 847.1481064                                           | 995.9337523   | 1307.742215    |                |
| 872.5372226                                     | 0.583888238                                           | 0.000541685   | 0.006556404    | EMP2           |
| 16                                              | 10528422                                              | 10580698      | - 8718         |                |
| protein_coding                                  | epithelial membrane protein 2 [Source:HGNC            |               |                |                |
| Symbol;Acc:HGNC:3334]                           | -                                                     | 1066 1308     | 1511 771       | 927            |
| 1015                                            | 6.687057426                                           | 6.614923671   | 8.0287892      |                |
| 4.276010174                                     | 4.633631229                                           | 5.434945749   |                |                |
| ENSG00000213139                                 | 20.82531016                                           | 17.61207168   | 41.06753348    | 0              |
| 3.65543951                                      | 0                                                     | 26.50163844   | 1.218479837    |                |
| 4.403948573                                     | 0.000550122                                           | 0.006653258   | CRYGS 3        |                |
| 186538441                                       | 186546702                                             | - 2151        | protein_coding |                |
| crystallin gamma S [Source:HGNC                 | Symbol;Acc:HGNC:2417]                                 | -             |                | 18             |
| 19                                              | 42 0                                                  | 4 0           | 0.457642983    |                |
| 0.389445911                                     | 0.904505758                                           | 0 0.081036034 | 0              |                |
| ENSG00000090565                                 | 1109.526247                                           | 1466.436705   | 1624.123169    |                |
| 2116.646314                                     | 2011.40559                                            | 2088.026625   | 1400.028707    |                |
| 2072.026176                                     | -0.564858421                                          | 0.000555603   | 0.006714236    |                |
| RAB11FIP3                                       | 16 425619                                             | 523011 +      | 6317           | protein_coding |
| RAB11 family interacting protein 3 [Source:HGNC |                                                       |               |                |                |
| Symbol;Acc:HGNC:17224]                          | -                                                     | 959 1582      | 1661 2107      | 2201           |
| 2128                                            | 8.302376862                                           | 11.04153772   | 12.18039049    |                |
| 16.12704787                                     | 15.1833556                                            | 15.72558399   |                |                |
| ENSG00000168710                                 | 4814.117533                                           | 4623.632291   | 5505.005083    |                |
| 3515.019199                                     | 3655.43951                                            | 3836.552681   | 4980.918302    |                |

|                                     |                                                       |             |             |             |
|-------------------------------------|-------------------------------------------------------|-------------|-------------|-------------|
| 3669.003797                         | 0.441034329                                           | 0.000558416 | 0.006742899 | AHCYL1      |
| 1                                   | 109984686                                             | 110023741   | + 5113      |             |
| protein_coding                      | adenosylhomocysteine like 1 [Source:HGNC              |             |             |             |
| Symbol;Acc:HGNC:344]                | -                                                     | 4161 4988   | 5630 3499   | 4000        |
| 3910                                | 44.50580244                                           | 43.01150213 | 51.00761976 |             |
| 33.08791232                         | 34.09123986                                           | 35.69825607 |             |             |
| ENSG00000134363                     | 134.2075544                                           | 111.2341369 | 149.6031577 |             |
| 52.23806755                         | 36.5543951                                            | 63.77900877 | 131.6816163 |             |
| 50.85715714                         | 1.373700276                                           | 0.000569375 | 0.006869797 | FST         |
| 5                                   | 53480409                                              | 53487134    | + 2969      |             |
| protein_coding                      | follistatin [Source:HGNC Symbol;Acc:HGNC:3971]        |             |             | -           |
| 116                                 | 120 153                                               | 52 40       | 65          | 2.136694856 |
| 1.781988949                         | 2.387171875                                           | 0.846826349 | 0.587095013 |             |
| 1.021995997                         |                                                       |             |             |             |
| ENSG00000061337                     | 195.5265232                                           | 245.6420523 | 455.6540619 |             |
| 111.5081826                         | 106.0077458                                           | 171.7127159 | 298.9408792 |             |
| 129.7428814                         | 1.205556884                                           | 0.000575772 | 0.006941498 | LZTS1       |
| 8                                   | 20246165                                              | 20303963    | - 5706      |             |
| protein_coding                      | leucine zipper tumor suppressor 1 [Source:HGNC        |             |             |             |
| Symbol;Acc:HGNC:13861]              | -                                                     | 169 265     | 466 111     | 116         |
| 175                                 | 1.619756196                                           | 2.047613879 | 3.783176516 |             |
| 0.940572827                         | 0.885900241                                           | 1.431700963 |             |             |
| ENSG00000239672                     | 1949.480424                                           | 1940.108738 | 2275.336914 |             |
| 1537.00468                          | 1304.991905                                           | 1502.24096  | 2054.975359 |             |
| 1448.079182                         | 0.505248145                                           | 0.000581525 | 0.007005334 | NME1        |
| 17                                  | 51153536                                              | 51162428    | + 3438      |             |
| protein_coding                      | NME/NM23 nucleoside diphosphate kinase 1 [Source:HGNC |             |             |             |
| Symbol;Acc:HGNC:7849]               | -                                                     | 1685 2093   | 2327 1530   | 1428        |
| 1531                                | 26.80332952                                           | 26.84091483 | 31.35400092 |             |
| 21.51725045                         | 18.10009827                                           | 20.78812666 |             |             |
| ENSG00000101199                     | 2803.31814                                            | 3463.089462 | 3451.628409 |             |
| 4757.68246                          | 4124.249627                                           | 4628.393605 | 3239.345337 |             |
| 4503.441897                         | -0.474974541                                          | 0.000583123 | 0.007019061 |             |
| ARFGAP1 20                          | 63272785                                              | 63289793    | + 6613      |             |
| protein_coding                      | ADP ribosylation factor GTPase activating protein 1   |             |             |             |
| [Source:HGNC Symbol;Acc:HGNC:15852] | -                                                     |             | 2423 3736   | 3530        |
| 4736                                | 4513 4717                                             | 20.03778001 | 24.90819763 |             |
| 24.72741049                         | 34.62696177                                           | 29.73893479 | 33.29763508 |             |
| ENSG00000102241                     | 3746.241906                                           | 3211.885703 | 3525.941089 |             |
| 2694.278791                         | 2438.178153                                           | 2559.010075 | 3494.689566 |             |
| 2563.82234                          | 0.446743985                                           | 0.000585627 | 0.007043646 |             |
| HTATSF1 X                           | 136497079                                             | 136512346   | + 3136      |             |
| protein_coding                      | HIV-1 Tat specific factor 1 [Source:HGNC              |             |             |             |
| Symbol;Acc:HGNC:5276]               | -                                                     | 3238 3465   | 3606 2682   | 2668        |
| 2608                                | 56.46710248                                           | 48.71482457 | 53.26625014 |             |
| 41.35080189                         | 37.07390809                                           | 38.82196993 |             |             |
| ENSG00000197043                     | 2325.492968                                           | 1941.035689 | 2831.704213 |             |
| 1354.171443                         | 1293.111727                                           | 1899.633246 | 2366.077623 |             |
| 1515.638805                         | 0.642614913                                           | 0.000586129 | 0.007044145 | ANXA6       |
| 5                                   | 151100712                                             | 151157882   | - 5427      |             |

|                                                 |                                              |             |             |             |                    |             |
|-------------------------------------------------|----------------------------------------------|-------------|-------------|-------------|--------------------|-------------|
| protein_coding                                  | annexin A6 [Source:HGNC Symbol;Acc:HGNC:544] | -           |             |             |                    |             |
| 2010                                            | 2094                                         | 2896        | 1348        | 1415        | 1936               | 20.25493942 |
| 17.01182137                                     |                                              | 24.71958593 |             | 12.00967589 |                    | 11.36201128 |
| 16.65296492                                     |                                              |             |             |             |                    |             |
| ENSG0000050405                                  | 1585.037496                                  |             | 1192.059167 |             | 1387.495953        |             |
| 829.7816114                                     | 963.2083108                                  |             | 997.8961833 |             | 1388.197538        |             |
| 930.2953685                                     | 0.57676786                                   |             | 0.000587103 |             | 0.007050309        | LIMA1       |
| 12                                              | 50175788                                     |             | 50283546    |             | - 6317             |             |
| protein_coding                                  | LIM domain and actin binding 1 [Source:HGNC  |             |             |             |                    |             |
| Symbol;Acc:HGNC:24636]                          | -                                            |             | 1370 1286   |             | 1419 826           | 1054        |
| 1017                                            | 11.86053837                                  |             | 8.975611569 |             | 10.40576406        |             |
| 6.322231393                                     | 7.27090268                                   |             | 7.515469417 |             |                    |             |
| ENSG00000133112                                 | 46438.12774                                  |             | 39484.4108  |             | 33119.98795        |             |
| 47119.7415                                      | 60800.0115                                   |             | 64180.32591 |             | 39680.84216        |             |
| 57366.69297                                     | -0.531796458                                 |             | 0.000589079 |             | 0.007068481        | TPT1        |
| 13                                              | 45333471                                     |             | 45341370    |             | - 7269             |             |
| protein_coding                                  | "tumor protein, translationally-controlled 1 |             |             |             |                    |             |
| [Source:HGNC Symbol;Acc:HGNC:12022]"            | -                                            |             |             |             | 40138 42596        | 33872       |
| 46905                                           | 66531 65409                                  |             | 301.9783254 |             | 258.3616845        |             |
| 215.858238                                      | 311.9936019                                  |             | 398.8485156 |             | 420.0576288        |             |
| ENSG00000176225                                 | 616.6605732                                  |             | 504.2614206 |             | 628.7243816        |             |
| 314.4329835                                     | 338.1281546                                  |             | 412.1105182 |             | 583.2154585        |             |
| 354.8905521                                     | 0.716218834                                  |             | 0.000593199 |             | 0.007112335        | RTTN        |
| 18                                              | 70003031                                     |             | 70205945    |             | - 19323            |             |
| protein_coding                                  | rotatin [Source:HGNC Symbol;Acc:HGNC:18654]  |             |             |             |                    |             |
| 533                                             | 544                                          | 643         | 313         | 370         | 420                | 1.508507132 |
| 1.241247263                                     |                                              | 1.54148348  |             | 0.783196973 |                    | 0.834422042 |
| 1.014660543                                     |                                              |             |             |             |                    |             |
| ENSG00000132286                                 | 888.5465669                                  |             | 922.3163851 |             | 760.7271678        |             |
| 1279.832655                                     | 1301.336465                                  |             | 1167.646468 |             | 857.1967066        |             |
| 1249.605196                                     | -0.543902525                                 |             | 0.000595342 |             | 0.007132439        |             |
| TIMM10B 11                                      | 6481447 6484679 +                            |             | 3041        |             | protein_coding     |             |
| translocase of inner mitochondrial membrane 10B |                                              |             |             |             | [Source:HGNC       |             |
| Symbol;Acc:HGNC:4022]                           | -                                            |             | 768 995     |             | 778 1274           | 1424        |
| 1190                                            | 13.81145754                                  |             | 14.42582364 |             | 11.8512902         |             |
| 20.256025                                       | 20.40573145                                  |             | 18.26739321 |             |                    |             |
| ENSG00000254615                                 | 267.2581471                                  |             | 238.2264432 |             | 234.6716199        |             |
| 383.7488808                                     | 437.7388813                                  |             | 419.9602423 |             | 246.7187367        |             |
| 413.8160015                                     | -0.747238229                                 |             | 0.00059686  |             | 0.007145029        |             |
| AC027031.2                                      | 8                                            | 106270144   |             | 106272899   |                    | + 1419      |
| lincRNA novel transcript                        |                                              |             |             |             | 231 257            | 240         |
| 382                                             | 479                                          | 428         | 8.902752442 |             | 7.98517955         |             |
| 7.83486111                                      | 13.01613918                                  |             | 14.70996758 |             | 14.08015415        |             |
| ENSG00000186594                                 | 308.9087674                                  |             | 304.9669253 |             | 300.1841138        |             |
| 463.1105604                                     | 524.5555696                                  |             | 484.7204666 |             | 304.6866022        |             |
| 490.7955322                                     | -0.688130824                                 |             | 0.000598874 |             | 0.007163526        |             |
| MIR22HG 17                                      | 1711493 1717174 -                            |             | 2986        |             | lincRNA MIR22 host |             |
| gene [Source:HGNC Symbol;Acc:HGNC:28219]        |                                              |             |             |             | - 267 329          |             |
| 307                                             | 461                                          | 574         | 494         | 4.890082327 |                    | 4.85780472  |
| 4.76267589                                      |                                              | 7.464699656 |             | 8.376848996 |                    | 7.722949257 |

|                                |                                                       |             |             |        |
|--------------------------------|-------------------------------------------------------|-------------|-------------|--------|
| ENSG00000157193                | 1454.300826                                           | 1489.610483 | 1725.814205 |        |
| 1175.35652                     | 941.2756737                                           | 1091.111658 | 1556.575171 |        |
| 1069.24795                     | 0.542201059                                           | 0.000603898 | 0.007217977 | LRP8   |
| 1                              | 53242364                                              | 53328070    | - 10263     |        |
| protein_coding                 | LDL receptor related protein 8 [Source:HGNC           |             |             |        |
| Symbol;Acc:HGNC:6700]          | -                                                     | 1257 1607   | 1765 1170   | 1030   |
| 1112                           | 6.698162223                                           | 6.903598184 | 7.966596784 |        |
| 5.512044935                    | 4.37342309                                            | 5.057972854 |             |        |
| ENSG00000197563                | 637.4858833                                           | 456.0599613 | 605.2572196 |        |
| 406.8541799                    | 237.6035681                                           | 305.1580266 | 566.2676881 |        |
| 316.5385915                    | 0.839270529                                           | 0.000608516 | 0.00726749  | PIGN   |
| 18                             | 61905255                                              | 62187118    | - 19003     |        |
| protein_coding                 | phosphatidylinositol glycan anchor biosynthesis class |             |             |        |
| N [Source:HGNC                 | Symbol;Acc:HGNC:8967]                                 | -           | 551 492     | 619    |
| 405                            | 260 311                                               | 1.585711381 | 1.141502567 |        |
| 1.508936405                    | 1.03046696                                            | 0.596224444 | 0.763983988 |        |
| ENSG00000119699                | 108.7543975                                           | 86.2064561  | 157.425545  |        |
| 49.22433288                    | 33.81281546                                           | 43.17348286 | 117.4621329 |        |
| 42.0702104                     | 1.48269878                                            | 0.000610282 | 0.00728289  | TGFB3  |
| 14                             | 75958099                                              | 75982991    | - 4914      |        |
| protein_coding                 | transforming growth factor beta 3 [Source:HGNC        |             |             |        |
| Symbol;Acc:HGNC:11769]         | -                                                     | 94 93       | 161 49      | 37     |
| 44                             | 1.046134234                                           | 0.834414331 | 1.517725321 |        |
| 0.482127767                    | 0.328114309                                           | 0.417987756 |             |        |
| ENSG00000188636                | 1345.546429                                           | 1180.008802 | 1372.828976 |        |
| 1946.872594                    | 1702.520952                                           | 1851.553685 | 1299.461402 |        |
| 1833.649077                    | -0.496961653                                          | 0.000611379 | 0.007290285 | RTL6   |
| 22                             | 44492572                                              | 44498298    | - 5495      |        |
| protein_coding                 | retrotransposon Gag like 6 [Source:HGNC               |             |             |        |
| Symbol;Acc:HGNC:13343]         | -                                                     | 1163 1273   | 1404 1938   | 1863   |
| 1887                           | 11.5746197                                            | 10.21397204 | 11.8359158  |        |
| 17.05246993                    | 14.77419259                                           | 16.03061704 |             |        |
| ENSG00000109881                | 748.5542042                                           | 801.8127368 | 894.6855508 |        |
| 532.4264577                    | 559.282245                                            | 531.8188116 | 815.0174973 |        |
| 541.1758381                    | 0.591007031                                           | 0.000613367 | 0.007303054 | CCDC34 |
| 11                             | 27330827                                              | 27363868    | - 3733      |        |
| protein_coding                 | coiled-coil domain containing 34 [Source:HGNC         |             |             |        |
| Symbol;Acc:HGNC:25079]         | -                                                     | 647 865     | 915 530     | 612    |
| 542                            | 9.478530316                                           | 10.21626326 | 11.35443582 |        |
| 6.864661016                    | 7.144174107                                           | 6.777777885 |             |        |
| ENSG00000120265                | 1629.002039                                           | 1386.718907 | 1365.006589 |        |
| 953.3447327                    | 964.1221707                                           | 1105.82989  | 1460.242512 |        |
| 1007.765598                    | 0.534653941                                           | 0.000613405 | 0.007303054 | PCMT1  |
| 6                              | 149749443                                             | 149811420   | + 2832      |        |
| protein_coding                 | protein-L-isoaspartate (D-aspartate) O-               |             |             |        |
| methyltransferase [Source:HGNC | Symbol;Acc:HGNC:8728]                                 | -           |             | 1408   |
| 1496                           | 1396 949                                              | 1055 1127   | 27.18968139 |        |
| 23.2901509                     | 22.83466397                                           | 16.20220713 | 16.23371093 |        |
| 18.57704798                    |                                                       |             |             |        |
| ENSG00000113916                | 804.0883646                                           | 757.3190821 | 585.7012513 |        |

|                        |                                                |             |              |         |
|------------------------|------------------------------------------------|-------------|--------------|---------|
| 1030.697256            | 1143.238707                                    | 1082.280718 | 715.7028993  |         |
| 1085.40556             | -0.60146547                                    | 0.000619052 | 0.00736455   | BCL6    |
| 3                      | 187721377                                      | 187745727   | - 5938       |         |
| protein_coding         | B cell CLL/lymphoma 6 [Source:HGNC             |             |              |         |
| Symbol;Acc:HGNC:1001]  | ZBTB                                           | 695 817     | 599 1026     | 1251    |
| 1103                   | 6.400874675                                    | 6.06618738  | 4.672927951  |         |
| 8.354267633            | 9.180698269                                    | 8.671242962 |              |         |
| ENSG00000182446        | 5253.762969                                    | 5135.30932  | 4968.193753  |         |
| 8689.60162             | 6561.51392                                     | 6357.295351 | 5119.088681  |         |
| 7202.80363             | -0.492651751                                   | 0.000620067 | 0.007370892  | NPL0C4  |
| 17                     | 81556887                                       | 81648465    | - 9574       |         |
| protein_coding         | "NPL4 homolog, ubiquitin recognition factor    |             |              |         |
| [Source:HGNC           | Symbol;Acc:HGNC:18261]"                        | -           | 4541 5540    | 5081    |
| 8650                   | 7180 6479                                      | 25.93897386 | 25.51234032  |         |
| 24.58432155            | 43.68415112                                    | 32.68056971 | 31.59079772  |         |
| ENSG00000172795        | 1000.771849                                    | 787.9084697 | 959.2202463  |         |
| 623.8430759            | 563.8515444                                    | 625.0342859 | 915.9668552  |         |
| 604.2429687            | 0.599786119                                    | 0.000622016 | 0.007388311  | DCP2    |
| 5                      | 112976702                                      | 113020970   | + 9951       |         |
| protein_coding         | decapping mRNA 2 [Source:HGNC                  |             |              |         |
| Symbol;Acc:HGNC:24452] | -                                              | 865 850     | 981 621      | 617 637 |
| 4.753834892            | 3.766050657                                    | 4.566723706 | 3.017352786  |         |
| 2.701948304            | 2.98826248                                     |             |              |         |
| ENSG00000117461        | 252.2176453                                    | 214.1257135 | 365.6966076  |         |
| 105.4807133            | 179.116536                                     | 77.51602604 | 277.3466555  |         |
| 120.7044251            | 1.198739081                                    | 0.000627255 | 0.007440307  | PIK3R3  |
| 1                      | 46040140                                       | 46133036    | - 7410       |         |
| protein_coding         | phosphoinositide-3-kinase regulatory subunit 3 |             |              |         |
| [Source:HGNC           | Symbol;Acc:HGNC:8981]                          | -           | 218 231      | 374     |
| 105                    | 196 79                                         | 1.608914621 | 1.3744446152 |         |
| 2.338061066            | 0.685128932                                    | 1.152647363 | 0.497685421  |         |
| ENSG00000198933        | 233.7062585                                    | 382.8308212 | 312.8954932  |         |
| 514.3440497            | 563.8515444                                    | 521.0254408 | 309.8108576  |         |
| 533.0736783            | -0.780808062                                   | 0.000627402 | 0.007440307  | TBKBP1  |
| 17                     | 47694081                                       | 47712050    | + 4280       |         |
| protein_coding         | TBK1 binding protein 1 [Source:HGNC            |             |              |         |
| Symbol;Acc:HGNC:30140] | -                                              | 202 413     | 320 512      | 617     |
| 531                    | 2.581085037                                    | 4.254418815 | 3.463447949  |         |
| 5.783988336            | 6.282029808                                    | 5.791576375 |              |         |
| ENSG00000183778        | 201.3113316                                    | 124.2114529 | 274.7613549  |         |
| 90.41203998            | 41.12369448                                    | 96.15912091 | 200.0947131  |         |
| 75.89828512            | 1.39992653                                     | 0.000627854 | 0.007440307  |         |
| B3GALT5 21             | 39556442                                       | 39673137    | + 14319      |         |
| protein_coding         | "beta-1,3-galactosyltransferase 5 [Source:HGNC |             |              |         |
| Symbol;Acc:HGNC:920]"  | -                                              | 174 134     | 281 90       | 45      |
| 98                     | 0.664555523                                    | 0.412597001 | 0.909067406  |         |
| 0.303900236            | 0.13694886                                     | 0.319491584 |              |         |
| ENSG00000100151        | 440.8023984                                    | 621.9842155 | 487.9214097  |         |
| 850.8777541            | 698.1889463                                    | 967.4785022 | 516.9026745  |         |
| 838.8484009            | -0.697170818                                   | 0.000629039 | 0.007448585  | PICK1   |



|                             |                                                    |                        |                |        |  |
|-----------------------------|----------------------------------------------------|------------------------|----------------|--------|--|
| 22                          | 38056311                                           | 38075701               | +              | 4371   |  |
| protein_coding              | protein interacting with PRKCA 1 [Source:HGNC      |                        |                |        |  |
| Symbol;Acc:HGNC:9394]       | -                                                  | 381 671                | 499 847        | 764    |  |
| 986                         | 4.766931178                                        | 6.768238775            | 5.288374409    |        |  |
| 9.369228274                 | 7.616775406                                        | 10.53033395            |                |        |  |
| ENSG00000073060             | 941.766804                                         | 1334.809643            | 1700.391446    |        |  |
| 714.2551159                 | 764.9007174                                        | 932.1547435            | 1325.655964    |        |  |
| 803.7701923                 | 0.722453874                                        | 0.000633627            | 0.007497097    | SCARB1 |  |
| 12                          | 124776856                                          | 124882668              | - 7741         |        |  |
| protein_coding              | scavenger receptor class B member 1 [Source:HGNC   |                        |                |        |  |
| Symbol;Acc:HGNC:1664]       | -                                                  | 814 1440               | 1739 711       | 837    |  |
| 950                         | 5.750717718                                        | 8.201615072            | 10.40650675    |        |  |
| 4.440928181                 | 4.711801524                                        | 5.728917572            |                |        |  |
| ENSG00000104221             | 321.6353458                                        | 317.0172902            | 261.0721771    |        |  |
| 666.0353612                 | 510.8476715                                        | 403.2795785            | 299.908271     |        |  |
| 526.7208704                 | -0.812714222                                       | 0.000636953            | 0.007529952    | BRF2   |  |
| 8                           | 37843268                                           | 37849904               | - 2760         |        |  |
| protein_coding              | "BRF2, RNA polymerase III transcription initiation |                        |                |        |  |
| factor subunit [Source:HGNC | Symbol;Acc:HGNC:17298]"                            | -                      | 278            |        |  |
| 342                         | 267 663                                            | 559 411                | 5.508462872    |        |  |
| 5.463248837                 | 4.481306361                                        | 11.61463758            | 8.825947171    |        |  |
| 6.951503978                 |                                                    |                        |                |        |  |
| ENSG00000169710             | 15172.39542                                        | 18892.1912             | 24400.95948    |        |  |
| 12966.09111                 | 10127.39516                                        | 15168.61072            | 19488.51536    |        |  |
| 12754.03233                 | 0.611734438                                        | 0.000637388            | 0.007529952    | FASN   |  |
| 17                          | 82078333                                           | 82098332               | - 9364         |        |  |
| protein_coding              | fatty acid synthase [Source:HGNC                   | Symbol;Acc:HGNC:3594]  |                |        |  |
| -                           | 13114 20381                                        | 24955 12907            | 11082 15459    |        |  |
| 76.58936821                 | 95.96172406                                        | 123.4521407            | 66.64462392    |        |  |
| 51.57216204                 | 77.06656959                                        |                        |                |        |  |
| ENSG00000139880             | 211.7239867                                        | 294.7704628            | 501.6105875    |        |  |
| 214.9797395                 | 113.3186248                                        | 92.23425883            | 336.0350123    |        |  |
| 140.177541                  | 1.263106654                                        | 0.000637906            | 0.007530245    | CDH24  |  |
| 14                          | 23047062                                           | 23057538               | - 3748         |        |  |
| protein_coding              | cadherin 24 [Source:HGNC                           | Symbol;Acc:HGNC:14265] | -              |        |  |
| 183                         | 318 513                                            | 214 124                | 94 2.670214932 |        |  |
| 3.740774213                 | 6.340452286                                        | 2.760675796            | 1.441719261    |        |  |
| 1.170777337                 |                                                    |                        |                |        |  |
| ENSG00000234741             | 4468.185992                                        | 4370.574629            | 3318.647824    |        |  |
| 4642.155964                 | 6616.345512                                        | 7035.315275            | 4052.469482    |        |  |
| 6097.938917                 | -0.589641221                                       | 0.000639633            | 0.007544801    | GAS5   |  |
| 1                           | 173863900                                          | 173868882              | - 3631         |        |  |
| processed_transcript        | growth arrest specific 5 [Source:HGNC              |                        |                |        |  |
| Symbol;Acc:HGNC:16355]      | -                                                  | 3862 4715              | 3394 4621      | 7240   |  |
| 7170                        | 58.16754484                                        | 57.25183436            | 43.30001481    |        |  |
| 61.53340334                 | 86.89022364                                        | 92.18047519            |                |        |  |
| ENSG00000171222             | 843.4250616                                        | 1862.244842            | 1539.054707    |        |  |
| 2743.503124                 | 2013.23331                                         | 2524.667532            | 1414.908204    |        |  |
| 2427.134655                 | -0.777669636                                       | 0.000640181            | 0.007545445    | SCAND1 |  |
| 20                          | 35953617                                           | 35959472               | - 1996         |        |  |

|                                     |                                                   |             |             |             |             |                |
|-------------------------------------|---------------------------------------------------|-------------|-------------|-------------|-------------|----------------|
| protein_coding                      | SCAN domain containing 1 [Source:HGNC             |             |             |             |             |                |
| Symbol;Acc:HGNC:10566]              | -                                                 | 729         | 2009        | 1574        | 2731        | 2203           |
|                                     | 2573                                              | 19.97384632 | 44.37653184 | 36.52974553 |             |                |
| 66.1549552                          | 48.09639858                                       | 60.17627283 |             |             |             |                |
| ENSG00000172936                     | 1032.009815                                       | 1241.187578 | 1215.403431 |             |             |                |
| 1618.375516                         | 1650.430939                                       | 1669.047599 | 1162.866941 |             |             |                |
| 1645.951351                         | -0.50062603                                       | 0.000643101 | 0.007574028 |             |             | MYD88          |
|                                     | 3                                                 | 38138478    | 38143022    | +           | 3989        |                |
| protein_coding                      | "MYD88, innate immune signal transduction adaptor |             |             |             |             |                |
| [Source:HGNC Symbol;Acc:HGNC:7562]" | -                                                 |             | 892         | 1339        | 1243        |                |
|                                     | 1611                                              | 1806        | 1701        | 12.22912913 | 14.79961776 |                |
| 14.43475936                         | 19.52687385                                       | 19.72932865 | 19.90610604 |             |             |                |
| ENSG00000196510                     | 843.4250616                                       | 854.6489519 | 897.618946  |             |             |                |
| 603.7515114                         | 592.1812006                                       | 568.1237858 | 865.2309865 |             |             |                |
| 588.0188326                         | 0.557341776                                       | 0.000647954 | 0.007625303 |             |             | ANAPC7         |
|                                     | 12                                                | 110372900   | 110403730   | -           | 6009        |                |
| protein_coding                      | anaphase promoting complex subunit 7 [Source:HGNC |             |             |             |             |                |
| Symbol;Acc:HGNC:17380]              | -                                                 | 729         | 922         | 918         | 601         | 648            |
|                                     | 579                                               | 6.634680855 | 6.764920154 | 7.076897949 |             |                |
| 4.835857384                         | 4.699280833                                       | 4.498030496 |             |             |             |                |
| ENSG00000152953                     | 59.00504546                                       | 51.90926389 | 94.84644637 |             |             |                |
| 22.10072088                         | 16.44947779                                       | 15.69944831 | 68.58691857 |             |             |                |
| 18.08321566                         | 1.924897338                                       | 0.000652404 | 0.007671773 |             |             | STK32B         |
|                                     | 4                                                 | 5051442     | 5500998     | +           | 5324        | protein_coding |
| serine/threonine kinase 32B         | [Source:HGNC Symbol;Acc:HGNC:14217] -             |             |             |             |             |                |
|                                     | 51                                                | 56          | 97          | 22          | 18          | 16             |
|                                     | 0.463750017                                       | 0.84398775  | 0.199795568 | 0.523873997 | 0.147330633 |                |
|                                     | 0.140290406                                       |             |             |             |             |                |
| ENSG00000004864                     | 1266.873035                                       | 994.6185741 | 1159.668922 |             |             |                |
| 810.6946252                         | 610.4583981                                       | 808.521588  | 1140.386844 |             |             |                |
| 743.2248704                         | 0.617563201                                       | 0.000653707 | 0.007681188 |             |             |                |
| SLC25A13                            | 7                                                 | 96120220    | 96322147    | -           |             | 3710           |
| protein_coding                      | solute carrier family 25 member 13                |             |             |             |             |                |
| [Source:HGNC Symbol;Acc:HGNC:10983] | -                                                 |             | 1095        | 1073        | 1186        |                |
|                                     | 807                                               | 668         | 824         | 16.14116668 | 12.75145581 |                |
| 14.80857384                         | 10.51721717                                       | 7.846232095 | 10.36810383 |             |             |                |
| ENSG00000187678                     | 697.6478905                                       | 858.3567564 | 756.8159741 |             |             |                |
| 1143.210017                         | 1150.549586                                       | 1087.186796 | 770.940207  |             |             |                |
| 1126.982133                         | -0.547045208                                      | 0.000655713 | 0.007698833 |             |             | SPRY4          |
|                                     | 5                                                 | 142310427   | 142326455   | -           | 6565        |                |
| protein_coding                      | sprouty RTK signaling antagonist 4 [Source:HGNC   |             |             |             |             |                |
| Symbol;Acc:HGNC:15533]              | -                                                 | 603         | 926         | 774         | 1138        | 1259           |
|                                     | 1108                                              | 5.02316327  | 6.218851898 | 5.461459105 |             |                |
| 8.381249092                         | 8.356984515                                       | 7.878636538 |             |             |             |                |
| ENSG00000196369                     | 264.9442237                                       | 324.4328993 | 362.7632124 |             |             |                |
| 194.8881751                         | 160.8393384                                       | 163.8629918 | 317.3801118 |             |             |                |
| 173.1968351                         | 0.875236486                                       | 0.00065761  | 0.007715185 |             |             |                |
| SRGAP2B 1                           | 144887265                                         | 145095528   | -           | 7230        |             |                |
| protein_coding                      | SLIT-ROBO Rho GTPase activating protein 2B        |             |             |             |             |                |
| [Source:HGNC Symbol;Acc:HGNC:35237] | -                                                 |             | 229         | 350         | 371         |                |

|                                     |                                                |      |             |                 |        |
|-------------------------------------|------------------------------------------------|------|-------------|-----------------|--------|
| 194                                 | 176                                            | 167  | 1.732175525 | 2.134340498     |        |
| 2.377048638                         | 1.297372384                                    |      | 1.060798674 | 1.078261775     |        |
| ENSG00000197601                     | 2367.143589                                    |      | 1984.602393 | 1839.238821     |        |
| 1509.881068                         | 1413.74123                                     |      | 1433.555874 | 2063.661601     |        |
| 1452.392724                         | 0.506415603                                    |      | 0.0006595   | 0.007727951     | FAR1   |
| 11                                  | 13668670                                       |      | 13732346    | + 7501          |        |
| protein_coding                      | fatty acyl-CoA reductase 1 [Source:HGNC        |      |             |                 |        |
| Symbol;Acc:HGNC:26222]              | -                                              | 2046 | 2141        | 1881 1503       | 1547   |
| 1461                                | 14.91698925                                    |      | 12.58436945 | 11.61641412     |        |
| 9.688153956                         | 8.987310494                                    |      | 9.092369706 |                 |        |
| ENSG00000107485                     | 82.14427898                                    |      | 97.32986979 | 120.2692052     |        |
| 17.07782977                         | 35.64053522                                    |      | 42.19226734 | 99.91445132     |        |
| 31.63687744                         | 1.658380896                                    |      | 0.000659709 | 0.007727951     | GATA3  |
| 10                                  | 8045378 8075203                                | +    | 3436        | protein_coding  | GATA   |
| binding protein                     | 3 [Source:HGNC Symbol;Acc:HGNC:4172] zf-GATA   |      |             |                 | 71     |
| 105                                 | 123 17                                         |      | 39 43       | 1.130055846     |        |
| 1.347317969                         | 1.658266824                                    |      | 0.239219723 | 0.494618151     |        |
| 0.584199709                         |                                                |      |             |                 |        |
| ENSG00000145431                     | 2568.45492                                     |      | 1672.219858 | 1994.708769     |        |
| 1507.871911                         | 1323.269102                                    |      | 1304.035425 | 2078.461182     |        |
| 1378.392146                         | 0.592050978                                    |      | 0.000664169 | 0.00777294      | PDGFC  |
| 4                                   | 156760454                                      |      | 156971394   | - 5593          |        |
| protein_coding                      | platelet derived growth factor C [Source:HGNC  |      |             |                 |        |
| Symbol;Acc:HGNC:8801]               | -                                              | 2220 | 1804        | 2040 1501       | 1448   |
| 1329                                | 21.70715303                                    |      | 14.22085381 | 16.89615185     |        |
| 12.97588803                         | 11.28190245                                    |      | 11.09241725 |                 |        |
| ENSG00000188352                     | 586.5795696                                    |      | 688.7246976 | 692.2812786     |        |
| 481.1929683                         | 333.5588553                                    |      | 396.4110699 | 655.8618486     |        |
| 403.7209645                         | 0.701176218                                    |      | 0.000664567 | 0.00777294      | FOCAD  |
| 9                                   | 20658309                                       |      | 20995955    | + 10036         |        |
| protein_coding                      | focadhesin [Source:HGNC Symbol;Acc:HGNC:23377] |      |             |                 | -      |
| 507                                 | 743 708                                        |      | 479 365     | 404 2.762752747 |        |
| 3.264089956                         | 3.267947424                                    |      | 2.307682609 | 1.584859654     |        |
| 1.879172933                         |                                                |      |             |                 |        |
| ENSG00000137404                     | 828.3845598                                    |      | 807.3744437 | 1121.534783     |        |
| 406.8541799                         | 588.5257611                                    |      | 654.4707515 | 919.0979289     |        |
| 549.9502308                         | 0.740820111                                    |      | 0.000665253 | 0.007775013     | NRM    |
| 6                                   | 30688047                                       |      | 30691420    | - 2045          |        |
| protein_coding                      | nurim [Source:HGNC Symbol;Acc:HGNC:8003]       |      |             |                 | -      |
| 716                                 | 871 1147                                       |      | 405 644     | 667 19.14760337 |        |
| 18.77840929                         | 25.98199898                                    |      | 9.57553234  | 13.72306602     |        |
| 15.22574519                         |                                                |      |             |                 |        |
| ENSG00000215784                     | 144.6202095                                    |      | 118.649746  | 160.3589403     |        |
| 31.14192488                         | 62.14247166                                    |      | 67.70387084 | 141.2096319     |        |
| 53.6627558                          | 1.394029359                                    |      | 0.000667286 | 0.007792817     | FAM72D |
| 1                                   | 145096000                                      |      | 145112696   | + 2397          |        |
| protein_coding                      | family with sequence similarity 72 member D    |      |             |                 |        |
| [Source:HGNC Symbol;Acc:HGNC:33593] | -                                              |      |             | 125 128         | 164    |
| 31                                  | 68 69                                          |      | 2.85191575  | 2.354376388     |        |
| 3.169408876                         | 0.625309283                                    |      | 1.236230563 | 1.343776657     |        |

|                                 |                                                                                        |             |             |    |                |                        |
|---------------------------------|----------------------------------------------------------------------------------------|-------------|-------------|----|----------------|------------------------|
| ENSG00000173083                 | 165.4455196                                                                            |             | 134.4079154 |    | 191.6484896    |                        |
| 50.2289111                      | 82.24738897                                                                            |             | 76.53481052 |    | 163.8339749    |                        |
| 69.6703702                      | 1.23195131                                                                             |             | 0.000669716 |    | 0.007815231    | HPSE                   |
| 4                               | 83292461                                                                               |             | 83335153    |    | - 4721         |                        |
| protein_coding                  | heparanase [Source:HGNC Symbol;Acc:HGNC:5164]                                          |             |             |    | -              |                        |
| 143                             | 145                                                                                    | 196         | 50          | 90 | 78             | 1.656520252            |
|                                 | 1.354153697                                                                            | 1.923200338 | 0.5120793   |    |                | 0.830743796            |
|                                 | 0.771270354                                                                            |             |             |    |                |                        |
| ENSG00000144857                 | 248.7467603                                                                            |             | 252.1307103 |    | 455.6540619    |                        |
| 175.8011889                     | 134.337402                                                                             |             | 157.9756986 |    | 318.8438442    |                        |
| 156.0380965                     | 1.032170588                                                                            |             | 0.000683876 |    | 0.007974376    | BOC                    |
| 3                               | 113211003                                                                              |             | 113287459   |    | + 10330        |                        |
| protein_coding                  | "BOC cell adhesion associated, oncogene regulated [Source:HGNC Symbol;Acc:HGNC:17173]" |             |             |    | -              | 215 272 466            |
| 175                             | 147                                                                                    | 161         | 1.138237399 |    | 1.160920661    |                        |
| 2.089719768                     | 0.819103806                                                                            |             | 0.620119818 |    | 0.727564651    |                        |
| ENSG00000169045                 | 7781.724231                                                                            |             | 7821.613726 |    | 7547.625974    |                        |
| 6006.373189                     | 5109.390575                                                                            |             | 6165.958324 |    | 7716.987977    |                        |
| 5760.574029                     | 0.421885115                                                                            |             | 0.000688424 |    | 0.008015291    |                        |
| HNRNPH1                         | 5                                                                                      | 179614178   | 179634784   |    | - 9480         |                        |
| protein_coding                  | heterogeneous nuclear ribonucleoprotein H1 [Source:HGNC Symbol;Acc:HGNC:5041]          |             |             |    | -              | 6726 8438 7719         |
| 5979                            | 5591                                                                                   | 6284        | 38.80102857 |    | 39.24326578    |                        |
| 37.7185648                      | 30.49449408                                                                            |             | 25.7003923  |    | 30.94381635    |                        |
| ENSG00000143499                 | 1213.652798                                                                            |             | 1007.59589  |    | 1195.847463    |                        |
| 525.3944101                     | 760.331418                                                                             |             | 853.6575019 |    | 1139.03205     |                        |
| 713.1277767                     | 0.67506418                                                                             |             | 0.000688738 |    | 0.008015291    | SMYD2                  |
| 1                               | 214281102                                                                              |             | 214337131   |    | + 4889         |                        |
| protein_coding                  | SET and MYND domain containing 2 [Source:HGNC Symbol;Acc:HGNC:20982]                   |             |             |    | -              | 1049 1087 1223 523 832 |
| 870                             | 11.73411023                                                                            |             | 9.802649282 |    | 11.58801038    |                        |
| 5.172290014                     | 7.415866222                                                                            |             | 8.307019907 |    |                |                        |
| ENSG00000197183                 | 388.739123                                                                             |             | 406.0045997 |    | 693.2590771    |                        |
| 157.7187809                     | 313.453938                                                                             |             | 266.8906213 |    | 496.0009333    |                        |
| 246.0211134                     | 1.011203316                                                                            |             | 0.000688957 |    | 0.008015291    | NOL4L                  |
| 20                              | 32443059                                                                               |             | 32585074    |    | - 9448         |                        |
| protein_coding                  | nucleolar protein 4 like [Source:HGNC Symbol;Acc:HGNC:16106]                           |             |             |    | -              | 336 438 709 157 343    |
| 272                             | 1.9448858                                                                              |             | 2.043940193 |    | 3.476232427    |                        |
| 0.803453939                     | 1.582023146                                                                            |             | 1.343925069 |    |                |                        |
| ENSG00000141933                 | 381.797353                                                                             |             | 625.6920201 |    | 503.5661843    |                        |
| 677.0857216                     | 988.7963874                                                                            |             | 884.075183  |    | 503.6851858    |                        |
| 849.985764                      | -0.753699789                                                                           |             | 0.00069138  |    | 0.008037356    | TPGS1                  |
| 19                              | 507497                                                                                 | 519654      | + 3642      |    | protein_coding |                        |
| tubulin polyglutamylase complex | subunit 1 [Source:HGNC Symbol;Acc:HGNC:25058]                                          |             |             |    | -              | 330 675 515 674 1082   |
| 901                             | 4.955285838                                                                            |             | 8.171424819 |    | 6.550428995    |                        |
| 8.947901024                     | 12.94630747                                                                            |             | 11.54864111 |    |                |                        |
| ENSG00000143416                 | 244.1189136                                                                            |             | 194.6597396 |    | 231.7382246    |                        |
| 59.2701151                      | 129.7681026                                                                            |             | 109.8961382 |    | 223.5056259    |                        |

|                         |                |                                                     |             |                       |
|-------------------------|----------------|-----------------------------------------------------|-------------|-----------------------|
| 99.64478529             | 1.163192268    | 0.000692744                                         | 0.008037859 |                       |
| SELENBP1                | 1              | 151364302                                           | 151372733   | - 3504                |
|                         | protein_coding | selenium binding protein 1 [Source:HGNC             |             |                       |
| Symbol;Acc:HGNC:10719]  | -              | 211                                                 | 210         | 237 59 142            |
| 112                     | 3.293161811    | 2.642342774                                         | 3.133189802 |                       |
| 0.814121325             | 1.765968061    | 1.492106977                                         |             |                       |
| ENSG00000176974         | 857.3086017    | 1099.364053                                         | 1230.070408 |                       |
| 587.6782599             | 724.6908828    | 732.967993                                          | 1062.247687 |                       |
| 681.7790452             | 0.640184956    | 0.000692855                                         | 0.008037859 | SHMT1                 |
| 17                      | 18327860       | 18363563                                            | - 7281      |                       |
|                         | protein_coding | serine hydroxymethyltransferase 1 [Source:HGNC      |             |                       |
| Symbol;Acc:HGNC:10850]  | -              | 741                                                 | 1186        | 1258 585 793          |
| 747                     | 5.565726864    | 7.181705895                                         | 8.003723296 |                       |
| 3.884776622             | 4.746142287    | 4.78933931                                          |             |                       |
| ENSG00000184436         | 750.8681275    | 984.4221116                                         | 846.7734284 |                       |
| 1162.297003             | 1272.092949    | 1404.119408                                         | 860.6878892 |                       |
| 1279.50312              | -0.571240274   | 0.000693                                            | 0.008037859 | THAP7                 |
| 22                      | 20999104       | 21002196                                            | - 2879      |                       |
|                         | protein_coding | THAP domain containing 7 [Source:HGNC               |             |                       |
| Symbol;Acc:HGNC:23190]  | THAP           | 649                                                 | 1062        | 866 1157 1392         |
| 1431                    | 12.32814531    | 16.2636047                                          | 13.9340923  |                       |
| 19.43089973             | 21.06959405    | 23.20299277                                         |             |                       |
| ENSG00000126947         | 1032.009815    | 1122.537832                                         | 913.2637207 |                       |
| 1649.517441             | 1593.771626    | 1279.505037                                         | 1022.603789 |                       |
| 1507.598035             | -0.559952103   | 0.000694651                                         | 0.008050895 | ARMCX1                |
| X                       | 101550531      | 101554700                                           | + 2141      |                       |
|                         | protein_coding | armadillo repeat containing X-linked 1 [Source:HGNC |             |                       |
| Symbol;Acc:HGNC:18073]  | -              | 892                                                 | 1211        | 934 1642 1744         |
| 1304                    | 22.78467823    | 24.93798927                                         | 20.20843421 |                       |
| 37.08153486             | 35.49673522    | 28.43197051                                         |             |                       |
| ENSG00000160299         | 2139.222138    | 1896.542034                                         | 3270.735702 |                       |
| 1617.370937             | 1170.654503    | 1708.296219                                         | 2435.499958 |                       |
| 1498.773887             | 0.700675027    | 0.000697389                                         | 0.008076507 | PCNT                  |
| 21                      | 46324122       | 46445769                                            | + 11660     |                       |
|                         | protein_coding | pericentrin [Source:HGNC Symbol;Acc:HGNC:16068]     | -           |                       |
| 1849                    | 2046           | 3345                                                | 1610        | 1281 1741 8.672275649 |
|                         | 7.736437777    | 13.28923641                                         | 6.676187758 | 4.7875043             |
|                         | 6.970216319    |                                                     |             |                       |
| ENSG00000162852         | 1458.928673    | 1313.489767                                         | 1142.06855  |                       |
| 1930.799343             | 1894.431526    | 1746.563625                                         | 1304.828997 |                       |
| 1857.264831             | -0.509790764   | 0.000700471                                         | 0.008105263 | CNST                  |
| 1                       | 246566444      | 246668584                                           | + 5922      |                       |
|                         | protein_coding | "consortin, connexin sorting protein [Source:HGNC   |             |                       |
| Symbol;Acc:HGNC:26486]" | -              | 1261                                                | 1417        | 1168 1922 2073        |
| 1780                    | 11.64505104    | 10.54958572                                         | 9.136437665 |                       |
| 15.69228535             | 15.25420213    | 14.03129111                                         |             |                       |
| ENSG00000167767         | 533.3593325    | 646.0849452                                         | 808.6392902 |                       |
| 448.041887              | 285.1242818    | 414.0729492                                         | 662.6945226 |                       |
| 382.4130393             | 0.794498781    | 0.000700933                                         | 0.008105263 | KRT80                 |
| 12                      | 52168996       | 52192000                                            | - 4350      |                       |

|                                     |                                                        |             |             |             |             |       |             |
|-------------------------------------|--------------------------------------------------------|-------------|-------------|-------------|-------------|-------|-------------|
| protein_coding                      | keratin 80 [Source:HGNC Symbol;Acc:HGNC:27056]         | -           |             |             |             |       |             |
|                                     | 461                                                    | 697         | 827         | 446         | 312         | 422   | 5.795706459 |
|                                     | 7.064435741                                            |             | 8.806811653 |             | 4.957318451 |       | 3.125531893 |
|                                     | 4.528654928                                            |             |             |             |             |       |             |
| ENSG00000170006                     | 241.8049902                                            |             | 300.3321696 |             | 134.9361814 |       |             |
| 507.3120021                         | 416.7201041                                            |             | 401.3171475 |             | 225.6911138 |       |             |
| 441.7830846                         | -0.968699646                                           |             | 0.000704009 |             | 0.008133084 |       |             |
| TMEM154 4                           | 152618632                                              |             | 152680165   |             | -           | 11587 |             |
| protein_coding                      | transmembrane protein 154 [Source:HGNC                 |             |             |             |             |       |             |
| Symbol;Acc:HGNC:26489]              | -                                                      |             | 209         | 324         | 138         | 505   | 456         |
|                                     | 409                                                    | 0.986438449 | 1.232843533 |             | 0.551709593 |       |             |
| 2.107276809                         | 1.714953834                                            |             | 1.647776622 |             |             |       |             |
| ENSG00000126561                     | 401.4657015                                            |             | 355.9492381 |             | 457.6096588 |       |             |
| 174.7966106                         | 259.5362052                                            |             | 246.2850954 |             | 405.0081994 |       |             |
| 226.8726371                         | 0.835225137                                            |             | 0.000704403 |             | 0.008133084 |       | STAT5A      |
|                                     | 17                                                     | 42287547    | 42311943    |             | +           | 5754  |             |
| protein_coding                      | signal transducer and activator of transcription 5A    |             |             |             |             |       |             |
| [Source:HGNC Symbol;Acc:HGNC:11366] | STAT                                                   |             | 347         | 384         | 468         |       |             |
|                                     | 174                                                    | 284         | 251         | 3.298027936 | 2.942356727 |       |             |
| 3.767718532                         | 1.462111885                                            |             | 2.150834927 |             | 2.03633816  |       |             |
| ENSG00000117528                     | 1905.51588                                             |             | 1767.695826 |             | 1983.952986 |       |             |
| 1333.075301                         | 1417.39667                                             |             | 1345.246477 |             | 1885.721564 |       |             |
| 1365.239483                         | 0.465786717                                            |             | 0.000707644 |             | 0.008162704 |       | ABCD3       |
|                                     | 1                                                      | 94418455    | 94518666    |             | +           | 7589  |             |
| protein_coding                      | ATP binding cassette subfamily D member 3 [Source:HGNC |             |             |             |             |       |             |
| Symbol;Acc:HGNC:67]                 | -                                                      |             | 1647        | 1907        | 2029        | 1327  | 1551        |
|                                     | 1371                                                   | 11.86871658 | 11.07898816 |             | 12.38511233 |       |             |
| 8.454493343                         | 8.906064636                                            |             | 8.433326951 |             |             |       |             |
| ENSG00000136942                     | 10266.87791                                            |             | 10503.28338 |             | 10920.05271 |       |             |
| 12859.60582                         | 13495.88267                                            |             | 18530.25509 |             | 10563.40467 |       |             |
| 14961.91452                         | -0.502199699                                           |             | 0.000708036 |             | 0.008162704 |       | RPL35       |
|                                     | 9                                                      | 124857880   | 124861981   |             | -           | 1535  |             |
| protein_coding                      | ribosomal protein L35 [Source:HGNC                     |             |             |             |             |       |             |
| Symbol;Acc:HGNC:10344]              | -                                                      |             | 8874        | 11331       | 11168       | 12801 | 14768       |
|                                     | 18885                                                  | 316.1591515 | 325.4571505 |             | 337.0307146 |       |             |
| 403.2150504                         | 419.2488709                                            |             | 574.3209321 |             |             |       |             |
| ENSG00000137309                     | 10402.24243                                            |             | 17047.55843 |             | 13773.26849 |       |             |
| 19698.77436                         | 18769.76802                                            |             | 22037.11935 |             | 13741.02312 |       |             |
| 20168.55391                         | -0.553512038                                           |             | 0.000709682 |             | 0.008175512 |       | HMGA1       |
|                                     | 6                                                      | 34236873    | 34246231    |             | +           | 2327  |             |
| protein_coding                      | high mobility group AT-hook 1 [Source:HGNC             |             |             |             |             |       |             |
| Symbol;Acc:HGNC:5010]               | HMGI/HMGY                                              |             | 8991        | 18391       | 14086       | 19609 |             |
|                                     | 20539                                                  | 22459       | 211.3033231 | 348.4519659 | 280.4101673 |       |             |
|                                     | 407.4368258                                            | 384.6285426 | 450.5469641 |             |             |       |             |
| ENSG00000105486                     | 1790.976674                                            |             | 2081.932262 |             | 2539.342487 |       |             |
| 1174.351942                         | 1135.013968                                            |             | 1758.338211 |             | 2137.417141 |       |             |
| 1355.901373                         | 0.656948554                                            |             | 0.000711996 |             | 0.008195997 |       | LIG1        |
|                                     | 19                                                     | 48115445    | 48170603    |             | -           | 6576  |             |
| protein_coding                      | DNA ligase 1 [Source:HGNC Symbol;Acc:HGNC:6598]        | -           |             |             |             |       |             |
|                                     | 1548                                                   | 2246        | 2597        | 1169        | 1242        | 1792  | 12.87371423 |

|                                                                 |                                |             |             |             |                |
|-----------------------------------------------------------------|--------------------------------|-------------|-------------|-------------|----------------|
|                                                                 | 15.05850666                    | 18.29416538 | 8.59515916  | 8.230351608 |                |
|                                                                 | 12.72102882                    |             |             |             |                |
| ENSG00000210196                                                 | 218.6657567                    |             | 215.0526647 | 214.1378531 |                |
| 405.8496017                                                     | 337.2142948                    |             | 362.0685267 | 215.9520915 |                |
| 368.3774744                                                     | -0.770324543                   |             | 0.000713244 | 0.008198165 | MT-TP          |
| MT                                                              | 15956                          | 16023       | -           | 68          | Mt_tRNA        |
| mitochondrially encoded tRNA proline [Source:HGNC               |                                |             |             |             |                |
| Symbol;Acc:HGNC:7494]                                           | -                              |             | 189         | 232         | 219            |
|                                                                 | 369                            | 152.0014057 | 150.4225789 | 149.1892937 | 369            |
| 287.2590163                                                     | 236.4699999                    |             | 253.3165061 |             |                |
| ENSG00000075213                                                 | 240.6480285                    |             | 270.6697331 | 203.3820706 |                |
| 452.0601999                                                     | 457.8437986                    |             | 341.4630008 | 238.2332774 |                |
| 417.1223331                                                     | -0.807978805                   |             | 0.000713257 | 0.008198165 | SEMA3A         |
| 7                                                               | 83955777                       |             | 84492724    | -           | 9371           |
| protein_coding                                                  | semaphorin 3A [Source:HGNC     |             |             |             |                |
|                                                                 | Symbol;Acc:HGNC:10723]         |             |             |             |                |
| -                                                               | 208                            | 292         | 208         | 450         | 501            |
|                                                                 |                                |             |             |             | 348            |
| 1.213869809                                                     | 1.37382328                     |             | 1.028205335 | 2.321815961 |                |
| 2.329755715                                                     | 1.733561854                    |             |             |             |                |
| ENSG00000168807                                                 | 2420.363826                    |             | 2027.242145 | 2382.89474  |                |
| 1757.00731                                                      | 1508.782658                    |             | 1606.249805 | 2276.83357  |                |
| 1624.013258                                                     | 0.487357839                    |             | 0.000713809 | 0.008198347 | SNTB2          |
| 16                                                              | 69187129                       |             | 69309052    | +           | 9875           |
| protein_coding                                                  | syntrophin beta 2 [Source:HGNC |             |             |             |                |
|                                                                 | Symbol;Acc:HGNC:11169]         |             |             |             |                |
| -                                                               | 2092                           | 2187        | 2437        | 1749        | 1651           |
|                                                                 |                                |             |             |             | 1637           |
| 11.58562023                                                     | 9.764401679                    |             | 11.43196486 | 8.563551654 |                |
| 7.285654406                                                     | 7.738514683                    |             |             |             |                |
| ENSG00000105248                                                 | 487.0808655                    |             | 792.5432254 | 664.902923  |                |
| 1058.825446                                                     | 956.8112917                    |             | 1076.393425 | 648.1756713 |                |
| 1030.676721                                                     | -0.667588458                   |             | 0.000714999 | 0.008199926 | YJU2           |
| 19                                                              | 4247079                        | 4269090     | +           | 1671        | protein_coding |
| splicing factor                                                 | homolog [Source:HGNC           |             |             |             |                |
|                                                                 | Symbol;Acc:HGNC:25518]         |             |             |             |                |
|                                                                 |                                |             |             |             | -              |
|                                                                 | 421                            | 855         | 680         | 1054        | 1047           |
|                                                                 |                                |             |             |             | 1097           |
|                                                                 |                                |             |             |             | 13.77844981    |
|                                                                 | 22.55919627                    | 18.8510228  | 30.49757988 | 27.30416059 |                |
|                                                                 | 30.6461705                     |             |             |             |                |
| ENSG00000136240                                                 | 9108.759273                    |             | 7177.382684 | 7431.267963 |                |
| 5713.036349                                                     | 6015.939573                    |             | 5680.256642 | 7905.803306 |                |
| 5803.077521                                                     | 0.445919588                    |             | 0.000715296 | 0.008199926 | KDELR2         |
| 7                                                               | 6445953                        | 6484242     | -           | 3990        | protein_coding |
| endoplasmic reticulum protein retention receptor 2 [Source:HGNC |                                |             |             |             |                |
|                                                                 | Symbol;Acc:HGNC:6305]          |             |             |             |                |
|                                                                 |                                |             |             |             | -              |
|                                                                 | 5789                           | 107.9100934 | 85.55991049 | 88.23545964 | 6583           |
|                                                                 |                                |             |             |             |                |
| 68.91464908                                                     | 71.89679934                    |             | 67.72931601 |             |                |
| ENSG00000099783                                                 | 9689.554034                    |             | 9870.175748 | 10823.25067 |                |
| 7983.38313                                                      | 7097.949668                    |             | 7881.123052 | 10127.66015 |                |
| 7654.15195                                                      | 0.404052216                    |             | 0.000715556 | 0.008199926 | HNRNPM         |
| 19                                                              | 8444767                        | 8489114     | +           | 5614        | protein_coding |
| heterogeneous nuclear ribonucleoprotein M [Source:HGNC          |                                |             |             |             |                |
|                                                                 | Symbol;Acc:HGNC:5046]          |             |             |             |                |
|                                                                 |                                |             |             |             | -              |
|                                                                 | 8032                           | 81.58439929 | 83.62374097 | 91.33525276 | 7767           |
|                                                                 |                                |             |             |             |                |
| 68.44347025                                                     | 60.28919632                    |             | 66.78782912 |             |                |

|                                                  |                                                  |             |                |        |  |
|--------------------------------------------------|--------------------------------------------------|-------------|----------------|--------|--|
| ENSG00000135677                                  | 3592.366003                                      | 2979.220967 | 4222.133561    |        |  |
| 2718.388669                                      | 2089.08368                                       | 2565.878583 | 3597.906844    |        |  |
| 2457.783644                                      | 0.549868994                                      | 0.000717    | 0.008210319    | GNS    |  |
| 12                                               | 64713445                                         | 64759447    | - 6284         |        |  |
| protein_coding                                   | glucosamine (N-acetyl)-6-sulfatase [Source:HGNC  |             |                |        |  |
| Symbol;Acc:HGNC:4422]                            | -                                                | 3105 3214   | 4318 2706      | 2286   |  |
| 2615                                             | 27.02216496                                      | 22.54984983 | 31.83089994    |        |  |
| 20.82058043                                      | 15.85253233                                      | 19.42591807 |                |        |  |
| ENSG00000179271                                  | 2384.498014                                      | 2568.581611 | 2679.16766     |        |  |
| 3447.712458                                      | 3239.633265                                      | 3615.779189 | 2544.082428    |        |  |
| 3434.374971                                      | -0.432669056                                     | 0.000718907 | 0.008226       |        |  |
| GADD45GIP1                                       | 19 12953119                                      | 12957236    | -              | 1782   |  |
| protein_coding                                   | GADD45G interacting protein 1 [Source:HGNC       |             |                |        |  |
| Symbol;Acc:HGNC:29996]                           | -                                                | 2061 2771   | 2740 3432      | 3545   |  |
| 3685                                             | 63.25065173                                      | 68.55873316 | 71.22710926    |        |  |
| 93.11953443                                      | 86.68962765                                      | 96.53300559 |                |        |  |
| ENSG00000139737                                  | 288.0834573                                      | 431.0322805 | 277.6947502    |        |  |
| 566.5821172                                      | 676.2563093                                      | 492.5701908 | 332.2701626    |        |  |
| 578.4695391                                      | -0.798760871                                     | 0.000727525 | 0.008318383    | SLAIN1 |  |
| 13                                               | 77697854                                         | 77764242    | + 4133         |        |  |
| protein_coding                                   | SLAIN motif family member 1 [Source:HGNC         |             |                |        |  |
| Symbol;Acc:HGNC:26387]                           | -                                                | 249 465     | 284 564        | 740    |  |
| 502                                              | 3.294796944                                      | 4.960454902 | 3.183137438    |        |  |
| 6.598039561                                      | 7.802340731                                      | 5.670016826 |                |        |  |
| ENSG00000111696                                  | 372.5416596                                      | 355.0222869 | 366.6744061    |        |  |
| 719.278007                                       | 496.2259134                                      | 570.0862168 | 364.7461175    |        |  |
| 595.1967124                                      | -0.706266211                                     | 0.00073073  | 0.008348782    | NT5DC3 |  |
| 12                                               | 103770453                                        | 103841197   | - 8722         |        |  |
| protein_coding                                   | 5'-nucleotidase domain containing 3 [Source:HGNC |             |                |        |  |
| Symbol;Acc:HGNC:30826]                           | -                                                | 322 383     | 375 716        | 543    |  |
| 581                                              | 2.018991554                                      | 1.936050359 | 1.99167119     |        |  |
| 3.969155891                                      | 2.712953469                                      | 3.109611157 |                |        |  |
| ENSG00000135315                                  | 362.1290045                                      | 261.4002217 | 261.0721771    |        |  |
| 169.7737195                                      | 115.1463446                                      | 168.7690693 | 294.8671344    |        |  |
| 151.2297111                                      | 0.963001572                                      | 0.000737064 | 0.008414857    | CEP162 |  |
| 6                                                | 84124241                                         | 84227635    | - 5474         |        |  |
| protein_coding                                   | centrosomal protein 162 [Source:HGNC             |             |                |        |  |
| Symbol;Acc:HGNC:21107]                           | -                                                | 313 282     | 267 169        | 126    |  |
| 172                                              | 3.127045908                                      | 2.271319729 | 2.259482199    |        |  |
| 1.492736417                                      | 1.003054082                                      | 1.466795908 |                |        |  |
| ENSG00000215375                                  | 89.08604903                                      | 100.1107232 | 128.0915925    |        |  |
| 302.3780448                                      | 175.4610965                                      | 205.0740436 | 105.7627883    |        |  |
| 227.6377283                                      | -1.103818853                                     | 0.000739582 | 0.008432586    | MYL5   |  |
| 4                                                | 673580 682033                                    | + 4305      | protein_coding | myosin |  |
| light chain 5 [Source:HGNC Symbol;Acc:HGNC:7586] | -                                                |             |                | 77     |  |
| 108                                              | 131 301                                          | 192 209     | 0.978165367    |        |  |
| 1.106074953                                      | 1.40961527                                       | 3.380605987 | 1.943509513    |        |  |
| 2.266309223                                      |                                                  |             |                |        |  |
| ENSG00000164715                                  | 853.8377167                                      | 788.8354209 | 1024.73274     |        |  |
| 1586.229013                                      | 1204.467318                                      | 1244.181279 | 889.1352926    |        |  |



|                                                                |                                                |             |                |           |
|----------------------------------------------------------------|------------------------------------------------|-------------|----------------|-----------|
| 1344.959203                                                    | -0.596876886                                   | 0.00073972  | 0.008432586    | LMTK2     |
| 7                                                              | 98106885                                       | 98209633    | + 9139         |           |
| protein_coding                                                 | lemur tyrosine kinase 2 [Source:HGNC           |             |                |           |
| Symbol;Acc:HGNC:17880]                                         | -                                              | 738 851     | 1048 1579      | 1318      |
| 1268                                                           | 4.416237256                                    | 4.105488507 | 5.312085556    |           |
| 8.353811458                                                    | 6.284566567                                    | 6.476891354 |                |           |
| ENSG00000122203                                                | 1866.179183                                    | 2237.660054 | 1891.062137    |           |
| 2560.669888                                                    | 3145.505698                                    | 2725.816713 | 1998.300458    |           |
| 2810.6641                                                      | -0.491971245                                   | 0.00074372  | 0.00846694     |           |
| KIAA1191                                                       | 5 176346061                                    | 176361968   | -              | 3973      |
| protein_coding                                                 | KIAA1191 [Source:HGNC                          |             |                |           |
| Symbol;Acc:HGNC:29209]                                         | -                                              | 1613 2414   | 1934 2549      | 3442 2778 |
| 22.20294152                                                    | 26.78876291                                    | 22.54967882 | 31.0207638     |           |
| 37.7529505                                                     | 32.64071866                                    |             |                |           |
| ENSG00000185115                                                | 519.4757924                                    | 620.1303132 | 581.7900576    |           |
| 949.3264198                                                    | 830.6986286                                    | 810.4840191 | 573.7987211    |           |
| 863.5030225                                                    | -0.588742378                                   | 0.000743841 | 0.00846694     | NSMCE3    |
| 15                                                             | 29264992                                       | 29269829    | - 4838         |           |
| protein_coding                                                 | "NSE3 homolog, SMC5-SMC6 complex component     |             |                |           |
| [Source:HGNC                                                   | Symbol;Acc:HGNC:7677]"                         | -           | 449 669        | 595       |
| 945                                                            | 909 826                                        | 5.075457432 | 6.096691387    |           |
| 5.69709626                                                     | 9.444243175                                    | 8.187599993 | 7.970034826    |           |
| ENSG00000115355                                                | 1564.212186                                    | 1342.225252 | 1755.148157    |           |
| 1051.793398                                                    | 1186.190121                                    | 765.3481052 | 1553.861865    |           |
| 1001.110542                                                    | 0.63394558                                     | 0.000745017 | 0.008474017    |           |
| CCDC88A 2                                                      | 55287842                                       | 55419895    | - 33942        |           |
| protein_coding                                                 | coiled-coil domain containing 88A [Source:HGNC |             |                |           |
| Symbol;Acc:HGNC:25523]                                         | -                                              | 1352 1448   | 1795 1047      | 1298      |
| 780                                                            | 2.178381676                                    | 1.880897333 | 2.449793509    |           |
| 1.491456081                                                    | 1.666463712                                    | 1.072761575 |                |           |
| ENSG00000115380                                                | 10.41265508                                    | 36.15109449 | 33.24514615    | 0         |
| 0                                                              | 3.924862078                                    | 26.60296524 | 1.308287359    |           |
| 4.359450825                                                    | 0.000749107                                    | 0.008514196 | EFEMP1 2       |           |
| 55865967                                                       | 55924139                                       | - 3962      | protein_coding | EGF       |
| containing fibulin extracellular matrix protein 1 [Source:HGNC |                                                |             |                |           |
| Symbol;Acc:HGNC:3218]                                          | -                                              | 9 39        | 34 0           | 0         |
| 4                                                              | 0.124228932                                    | 0.433994368 | 0.397527248    | 0         |
| 0                                                              | 0.047129361                                    |             |                |           |
| ENSG00000213390                                                | 460.4707469                                    | 634.0345803 | 562.2340893    |           |
| 342.5611737                                                    | 357.3192121                                    | 317.9138283 | 552.2464722    |           |
| 339.264738                                                     | 0.703797459                                    | 0.000749955 | 0.008517506    |           |
| ARHGAP19                                                       | 10 97222173                                    | 97292673    | -              | 6167      |
| protein_coding                                                 | Rho GTPase activating protein 19 [Source:HGNC  |             |                |           |
| Symbol;Acc:HGNC:23724]                                         | -                                              | 398 684     | 575 341        | 391       |
| 324                                                            | 3.529424015                                    | 4.890081657 | 4.319130757    |           |
| 2.673508979                                                    | 2.762876082                                    | 2.452545638 |                |           |
| ENSG00000258701                                                | 34.70885027                                    | 52.83621503 | 37.15633981    |           |
| 125.5722778                                                    | 110.5770452                                    | 98.12155195 | 41.56713504    |           |
| 111.423625                                                     | -1.418744742                                   | 0.000750687 | 0.008519489    |           |
| LINC00638                                                      | 14 104821201                                   | 104823718   | +              | 2518      |

|                                                                 |              |         |             |             |      |       |             |
|-----------------------------------------------------------------|--------------|---------|-------------|-------------|------|-------|-------------|
| lincRNA long intergenic non-protein coding RNA 638              |              |         |             |             |      |       |             |
| [Source:HGNC Symbol;Acc:HGNC:28325]                             | -            |         | 30          | 57          |      |       | 38          |
| 125                                                             | 121          | 100     | 0.651568742 | 0.998051813 |      |       |             |
| 0.699085552                                                     | 2.400244613  |         | 2.094055762 | 1.853917099 |      |       |             |
| ENSG00000186017                                                 | 295.0252273  |         | 267.8888797 | 211.2044579 |      |       |             |
| 493.247907                                                      | 434.9973016  |         | 396.4110699 | 258.0395216 |      |       |             |
| 441.5520928                                                     | -0.776002778 |         | 0.000753783 | 0.008548278 |      |       | ZNF566      |
| 19                                                              | 36445119     |         | 36489902    | -           |      | 6481  |             |
| protein_coding zinc finger protein 566 [Source:HGNC             |              |         |             |             |      |       |             |
| Symbol;Acc:HGNC:25919]                                          | zf-C2H2      | 255     | 289         | 216         | 491  |       | 476         |
| 404                                                             | 2.151755252  |         | 1.966028365 | 1.54388229  |      |       |             |
| 3.663031785                                                     | 3.200541987  |         | 2.909949013 |             |      |       |             |
| ENSG00000160796                                                 | 470.883402   |         | 769.3694469 | 489.8770065 |      |       |             |
| 1174.351942                                                     | 811.5075711  |         | 936.0796056 | 576.7099518 |      |       |             |
| 973.9797061                                                     | -0.75468986  |         | 0.000756992 | 0.008578311 |      |       | NBEAL2      |
| 3                                                               | 46979683     |         | 47009703    | +           |      | 9819  |             |
| protein_coding neurobeachin like 2 [Source:HGNC                 |              |         |             |             |      |       |             |
| Symbol;Acc:HGNC:31928]                                          | -            | 407     | 830         | 501         | 1169 |       | 888         |
| 954                                                             | 2.266845191  |         | 3.726874688 | 2.363594233 |      |       |             |
| 5.756366905                                                     | 3.940980659  |         | 4.53552067  |             |      |       |             |
| ENSG00000275496                                                 | 129.5797077  |         | 74.15609127 | 84.09066379 |      |       |             |
| 11.05036044                                                     | 23.76035681  |         | 44.15469838 | 95.94215425 |      |       |             |
| 26.32180521                                                     | 1.86357748   |         | 0.000758472 | 0.008585464 |      |       |             |
| CU633906.1                                                      | 21           | 6228966 | 6267317     | -           |      | 2878  | lincRNA     |
| uncharacterized LOC102724701 [Source:NCBI gene;Acc:102724701]   |              |         |             |             |      |       | -           |
| 112                                                             | 80           | 86      | 11          | 26          | 45   |       | 2.128246588 |
| 1.225555986                                                     | 1.384235929  |         | 0.184800487 | 0.393678009 |      |       |             |
| 0.729907389                                                     |              |         |             |             |      |       |             |
| ENSG00000223756                                                 | 72.88858557  |         | 148.3121825 | 72.3570828  |      |       |             |
| 215.9843177                                                     | 215.6709311  |         | 232.5480781 | 97.85261697 |      |       |             |
| 221.401109                                                      | -1.174069495 |         | 0.000758747 | 0.008585464 |      |       | TSSC2       |
| 11                                                              | 3380961      | 3408978 | +           |             |      | 3666  |             |
| transcribed_unprocessed_pseudogene tumor suppressing            |              |         |             |             |      |       |             |
| subtransferable candidate 2 pseudogene [Source:HGNC             |              |         |             |             |      |       |             |
| Symbol;Acc:HGNC:12384]                                          | -            | 63      | 160         | 74          | 215  |       | 236         |
| 237                                                             | 0.939815929  |         | 1.924249933 | 0.935064814 |      |       |             |
| 2.835614678                                                     | 2.805292432  |         | 3.017879682 |             |      |       |             |
| ENSG00000103742                                                 | 463.941632   |         | 554.3167822 | 824.2840648 |      |       |             |
| 347.5840648                                                     | 264.1055046  |         | 407.2044406 | 614.1808263 |      |       |             |
| 339.6313367                                                     | 0.855819742  |         | 0.00075991  | 0.008592267 |      |       | IGDCC4      |
| 15                                                              | 65381464     |         | 65423072    | -           |      | 7764  |             |
| protein_coding immunoglobulin superfamily DCC subclass member 4 |              |         |             |             |      |       |             |
| [Source:HGNC Symbol;Acc:HGNC:13770]                             | -            |         |             | 401         | 598  |       | 843         |
| 346                                                             | 289          | 415     | 2.824577912 | 3.395858732 |      |       |             |
| 5.029728046                                                     | 2.154724692  |         | 1.622074936 | 2.495218639 |      |       |             |
| ENSG00000179364                                                 | 1144.235097  |         | 1436.774268 | 1424.652292 |      |       |             |
| 1884.588745                                                     | 2038.821387  |         | 1790.718323 | 1335.220553 |      |       |             |
| 1904.709485                                                     | -0.511938894 |         | 0.000760937 | 0.008597515 |      |       | PACS2       |
| 14                                                              | 105300563    |         | 105398147   | +           |      | 12363 |             |
| protein_coding phosphofurin acidic cluster sorting protein 2    |              |         |             |             |      |       |             |

|                                                         |                                                |             |             |                    |
|---------------------------------------------------------|------------------------------------------------|-------------|-------------|--------------------|
| [Source:HGNC Symbol;Acc:HGNC:23794]                     | -                                              | 989         | 1550        | 1457               |
| 1876                                                    | 2231 1825                                      | 4.374889973 | 5.527665914 |                    |
| 5.459314808                                             | 7.336859142                                    | 7.863833303 | 6.891044197 |                    |
| ENSG00000232949                                         | 26.61011854                                    | 12.97731597 | 2.933395248 | 0                  |
| 0                                                       | 0                                              | 14.17360992 | 0           | 6.314565944        |
| 0.00076642                                              | 1                                              | AC002480.2  | 7           | 22589705           |
| 22591622                                                | +                                              | 557         | antisense   | "novel transcript, |
| antisense to STEAP1B"                                   | -                                              | 23          | 14          | 3 0 0              |
| 0                                                       | 2.258225741                                    | 1.108171045 | 0.249498831 | 0                  |
| 0                                                       | 0                                              |             |             |                    |
| ENSG00000167625                                         | 406.0935482                                    | 348.533629  | 490.8548049 |                    |
| 608.7744025                                             | 668.0315704                                    | 716.2873292 | 415.1606607 |                    |
| 664.364434                                              | -0.678533248                                   | 0.000767236 | 0.008656968 | ZNF526             |
| 19                                                      | 42220271                                       | 42228201    | +           | 4271               |
| protein_coding                                          | zinc finger protein 526 [Source:HGNC           |             |             |                    |
| Symbol;Acc:HGNC:29415]                                  | zf-C2H2                                        | 351 376     | 502 606     | 731                |
| 730                                                     | 4.494405546                                    | 3.881434229 | 5.444733175 |                    |
| 6.860318347                                             | 7.458412572                                    | 7.978832069 |             |                    |
| ENSG00000149968                                         | 830.6984832                                    | 466.2564238 | 490.8548049 |                    |
| 1309.970002                                             | 697.2750865                                    | 1274.59896  | 595.9365706 |                    |
| 1093.948016                                             | -0.877382725                                   | 0.000767646 | 0.008656968 | MMP3               |
| 11                                                      | 102835801                                      | 102843803   | -           | 2048               |
| protein_coding                                          | matrix metalloproteinase 3 [Source:HGNC        |             |             |                    |
| Symbol;Acc:HGNC:7173]                                   | -                                              | 718 503     | 502 1304    | 763                |
| 1299                                                    | 19.1729617                                     | 10.828592   | 11.35471455 |                    |
| 30.78568743                                             | 16.23503329                                    | 29.6091019  |             |                    |
| ENSG00000125651                                         | 2775.55106                                     | 3658.676153 | 3711.722788 |                    |
| 4953.575213                                             | 4196.444557                                    | 5413.366021 | 3381.983334 |                    |
| 4854.46193                                              | -0.521089673                                   | 0.000767897 | 0.008656968 | GTF2F1             |
| 19                                                      | 6379569 6393981                                | -           | 3134        | protein_coding     |
| general transcription factor IIF subunit 1 [Source:HGNC |                                                |             |             |                    |
| Symbol;Acc:HGNC:4652]                                   | -                                              | 2399 3947   | 3796 4931   | 4592               |
| 5517                                                    | 41.86257789                                    | 55.52672921 | 56.10863035 |                    |
| 76.07417073                                             | 63.85008577                                    | 82.17695176 |             |                    |
| ENSG00000166130                                         | 963.7490759                                    | 721.1679876 | 755.8381757 |                    |
| 339.547439                                              | 456.0160788                                    | 624.0530704 | 813.5850797 |                    |
| 473.2055294                                             | 0.781123161                                    | 0.000769689 | 0.008670771 | IKBIP              |
| 12                                                      | 98613405                                       | 98645113    | -           | 4163               |
| protein_coding                                          | IKBKB interacting protein [Source:HGNC         |             |             |                    |
| Symbol;Acc:HGNC:26430]                                  | -                                              | 833 778     | 773 338     | 499                |
| 636                                                     | 10.94292199                                    | 8.23961926  | 8.601526642 |                    |
| 3.925649362                                             | 5.223393358                                    | 7.131760342 |             |                    |
| ENSG00000198331                                         | 175.8581747                                    | 295.6974139 | 308.0065011 |                    |
| 138.6317946                                             | 127.026523                                     | 117.7458623 | 259.8540299 |                    |
| 127.8013933                                             | 1.025758745                                    | 0.000770529 | 0.008673837 | HYLS1              |
| 11                                                      | 125883614                                      | 125900648   | +           | 2999               |
| protein_coding                                          | "HYLS1, centriolar and ciliogenesis associated |             |             |                    |
| [Source:HGNC Symbol;Acc:HGNC:26558]"                    | -                                              | 152 319     | 315         |                    |
| 138                                                     | 139 120                                        | 2.771799646 | 4.689733621 |                    |
| 4.86560158                                              | 2.224865887                                    | 2.019746816 | 1.867887932 |                    |

|                                        |                                                    |             |                      |                |           |
|----------------------------------------|----------------------------------------------------|-------------|----------------------|----------------|-----------|
| ENSG0000007968                         | 452.3720152                                        | 517.2387366 | 756.8159741          |                |           |
| 355.6206906                            | 354.5776324                                        | 275.721561  | 575.4755753          |                |           |
| 328.6399613                            | 0.808798371                                        | 0.000772691 | 0.00869178           | E2F2           |           |
| 1                                      | 23506430                                           | 23531220    | - 5457               |                |           |
| protein_coding                         | E2F transcription factor 2 [Source:HGNC            |             |                      |                |           |
| Symbol;Acc:HGNC:3114]                  | E2F                                                | 391         | 558                  | 774            | 354 388   |
| 281                                    | 3.918478934                                        | 4.508314482 | 6.570364491          |                |           |
| 3.136537792                            | 3.098392049                                        | 2.403800394 |                      |                |           |
| ENSG00000213513                        | 21.98227184                                        | 1.853902282 | 19.55596832          | 0              |           |
| 0                                      | 0                                                  | 14.46404748 | 0                    | 6.344456106    |           |
| 0.000780602                            | 1                                                  | IMPDH1P5    | 10                   | 77780337       |           |
| 77781876                               | -                                                  | 1540        | processed_pseudogene | inosine        |           |
| monophosphate dehydrogenase 1          | pseudogene 5 [Source:HGNC                          |             |                      |                |           |
| Symbol;Acc:HGNC:33960]                 | -                                                  | 19          | 2                    | 20             | 0 0       |
| 0                                      | 0.674726229                                        | 0.057258931 | 0.601605407          | 0              |           |
| 0                                      | 0                                                  |             |                      |                |           |
| ENSG00000105290                        | 53.22023708                                        | 48.20145932 | 87.02405904          |                |           |
| 23.10529911                            | 9.138598774                                        | 11.77458623 | 62.81525182          |                |           |
| 14.67282804                            | 2.102584278                                        | 0.000784004 | 0.008812556          | APLP1          |           |
| 19                                     | 35867899                                           | 35879791    | + 3656               |                |           |
| protein_coding                         | amyloid beta precursor like protein 1 [Source:HGNC |             |                      |                |           |
| Symbol;Acc:HGNC:597]                   | -                                                  | 46          | 52                   | 89             | 23 10     |
| 12                                     | 0.68809176                                         | 0.627091789 | 1.127681032          |                |           |
| 0.304174544                            | 0.119193456                                        | 0.153221989 |                      |                |           |
| ENSG00000158863                        | 951.0224974                                        | 1266.215258 | 1193.891866          |                |           |
| 1669.609005                            | 1605.651805                                        | 1646.479642 | 1137.043207          |                |           |
| 1640.58015                             | -0.528065806                                       | 0.000784626 | 0.008813064          |                |           |
| FAM160B2                               | 8                                                  | 22089159    | 22104898             | + 8278         |           |
| protein_coding                         | family with sequence similarity 160 member B2      |             |                      |                |           |
| [Source:HGNC Symbol;Acc:HGNC:16492]    | -                                                  | 822         | 1366                 | 1221           |           |
| 1662                                   | 1757                                               | 1678        | 5.430516133          | 7.275439527    |           |
| 6.832705426                            | 9.707486916                                        | 9.249216328 | 9.462645497          |                |           |
| ENSG00000175573                        | 790.2048245                                        | 1326.467083 | 1098.067621          |                |           |
| 1516.913115                            | 1676.932875                                        | 1807.398987 | 1071.579843          |                |           |
| 1667.081659                            | -0.636599388                                       | 0.000786907 | 0.008832195          |                |           |
| C11orf68                               | 11                                                 | 65916808    | 65919117             | - 1761         |           |
| protein_coding                         | chromosome 11 open reading frame 68                |             |                      |                |           |
| [Source:HGNC Symbol;Acc:HGNC:28801]    | -                                                  | 683         | 1431                 | 1123           |           |
| 1510                                   | 1835                                               | 1842        | 21.21075172          | 35.82731282    |           |
| 29.54084107                            | 41.45899859                                        | 45.40830704 | 48.8288286           |                |           |
| ENSG00000132376                        | 882.7617586                                        | 986.2760139 | 941.6198748          |                |           |
| 1242.663261                            | 1303.164185                                        | 1475.748141 | 936.8858824          |                |           |
| 1340.525196                            | -0.516462838                                       | 0.000789217 | 0.008851618          | INPP5K         |           |
| 17                                     | 1494571                                            | 1516888     | - 5325               | protein_coding |           |
| inositol polyphosphate-5-phosphatase K | [Source:HGNC                                       |             |                      |                |           |
| Symbol;Acc:HGNC:33882]                 | -                                                  | 763         | 1064                 | 963            | 1237 1426 |
| 1504                                   | 7.836094028                                        | 8.809595621 | 8.377397654          |                |           |
| 11.23185024                            | 11.66966828                                        | 13.18482166 |                      |                |           |
| ENSG00000135317                        | 1396.452743                                        | 1095.656248 | 1132.290566          |                |           |
| 706.2184901                            | 763.0729976                                        | 928.2298814 | 1208.133186          |                |           |

|                                                           |                                                    |                           |                       |        |
|-----------------------------------------------------------|----------------------------------------------------|---------------------------|-----------------------|--------|
| 799.1737897                                               | 0.595631125                                        | 0.00079436                | 0.008902776           | SNX14  |
| 6                                                         | 85505496                                           | 85594156                  | - 7105                |        |
| protein_coding                                            | sorting nexin 14 [Source:HGNC                      | Symbol;Acc:HGNC:14977]    |                       |        |
| -                                                         | 1207 1182                                          | 1158 703                  | 835 946               |        |
| 9.290474606                                               | 7.334784394                                        | 7.549999675               | 4.784014191           |        |
| 5.121309126                                               | 6.21545734                                         |                           |                       |        |
| ENSG00000103121                                           | 767.065591                                         | 685.9438442               | 685.4366897           |        |
| 489.2295941                                               | 468.8101171                                        | 461.1712942               | 712.815375            |        |
| 473.0703351                                               | 0.59106292                                         | 0.00079667                | 0.008922122           | CMC2   |
| 16                                                        | 80966448                                           | 81020270                  | - 12781               |        |
| protein_coding                                            | C-X9-C motif containing 2 [Source:HGNC             | Symbol;Acc:HGNC:24447]    |                       |        |
| -                                                         | -                                                  | 663 740                   | 701 487               | 513    |
| 470                                                       | 2.836895944                                        | 2.552706257               | 2.540713171           |        |
| 1.842321171                                               | 1.749085857                                        | 1.716639332               |                       |        |
| ENSG00000130758                                           | 474.354287                                         | 818.4978574               | 695.2146739           |        |
| 984.4866576                                               | 1071.043776                                        | 1150.965804               | 662.6889394           |        |
| 1068.832079                                               | -0.688180364                                       | 0.000801077               | 0.008961515           |        |
| MAP3K10 19                                                | 40191744                                           | 40215575                  | + 4566                |        |
| protein_coding                                            | mitogen-activated protein kinase kinase kinase 10  | [Source:HGNC              | Symbol;Acc:HGNC:6849] |        |
| -                                                         | -                                                  | -                         | 410 883               | 711    |
| 980                                                       | 1172 1173                                          | 4.91069162                | 8.526263583           |        |
| 7.213335786                                               | 10.37746757                                        | 11.18536865               | 11.9924562            |        |
| ENSG00000143797                                           | 623.6023432                                        | 537.6316617               | 485.9658128           |        |
| 222.0117871                                               | 432.255722                                         | 207.0364746               | 549.0666059           |        |
| 287.1013279                                               | 0.933855512                                        | 0.000801632               | 0.008961515           | MBOAT2 |
| 2                                                         | 8852690 9003813                                    | - 8798                    | protein_coding        |        |
| membrane bound                                            | 0-acyltransferase domain containing 2 [Source:HGNC | Symbol;Acc:HGNC:25193]    |                       |        |
| -                                                         | -                                                  | 539 580                   | 497 221               | 473    |
| 211                                                       | 3.350422066                                        | 2.906551309               | 2.616826245           |        |
| 1.214533596                                               | 2.342803051                                        | 1.119552679               |                       |        |
| ENSG00000276550                                           | 952.1794591                                        | 818.4978574               | 1089.267436           |        |
| 663.0216265                                               | 417.633964                                         | 663.3016912               | 953.3149174           |        |
| 581.3190939                                               | 0.714071994                                        | 0.000801946               | 0.008961515           |        |
| HERC2P2 15                                                | 22495570                                           | 22590815                  | + 6965                |        |
| transcribed_unprocessed_pseudogene                        | hect domain and RLD 2                              | pseudogene 2 [Source:HGNC | Symbol;Acc:HGNC:4870] |        |
| -                                                         | -                                                  | -                         | 823 883               |        |
| 1114 660 457                                              | 676                                                | 6.462096322               | 5.589507469           |        |
| 7.409118244                                               | 4.581672383                                        | 2.859260187               | 4.530765773           |        |
| ENSG00000171735                                           | 600.4631097                                        | 634.9615315               | 561.2562909           |        |
| 335.5291262                                               | 403.0122059                                        | 406.2232251               | 598.893644            |        |
| 381.5881857                                               | 0.650059815                                        | 0.0008031                 | 0.008967856           | CAMTA1 |
| 1                                                         | 6785324 7769706                                    | + 10033                   | protein_coding        |        |
| calmodulin binding transcription activator 1 [Source:HGNC | Symbol;Acc:HGNC:18806]                             | CG-1                      |                       |        |
| -                                                         | -                                                  | 519 685                   | 574 334               | 441    |
| 414                                                       | 2.828988997                                        | 3.010188673               | 2.650229818           |        |
| 1.609595952                                               | 1.915430396                                        | 1.92626292                |                       |        |
| ENSG00000134901                                           | 704.5896605                                        | 699.8481113               | 780.2831361           |        |
| 524.3898319                                               | 458.7576585                                        | 460.1900786               | 728.2403026           |        |
| 481.112523                                                | 0.598374921                                        | 0.000806155               | 0.008993762           | KDELC1 |
| 13                                                        | 102784281                                          | 102799007                 | - 2367                |        |

|                                                             |                                                    |                 |              |              |             |                |
|-------------------------------------------------------------|----------------------------------------------------|-----------------|--------------|--------------|-------------|----------------|
| protein_coding                                              | KDEL motif containing 1 [Source:HGNC               |                 |              |              |             |                |
| Symbol;Acc:HGNC:19350]                                      | -                                                  | 609             | 755          | 798          | 522         | 502            |
|                                                             | 469                                                | 14.07063662     | 14.06315138  | 15.61734086  |             |                |
| 10.66285397                                                 | 9.241959413                                        | 9.249550346     |              |              |             |                |
| ENSG00000177370                                             | 736.9845874                                        | 775.8581049     | 784.1943298  |              |             |                |
| 1005.5828                                                   | 1191.67328                                         | 1121.529339     | 765.6790074  |              |             |                |
| 1106.261806                                                 | -0.530807742                                       | 0.000806597     | 0.008993762  |              |             | TIMM22         |
| 17                                                          | 997117                                             | 1003671         | +            | 3194         |             | protein_coding |
| translocase of inner mitochondrial membrane 22 [Source:HGNC |                                                    |                 |              |              |             |                |
| Symbol;Acc:HGNC:17317]                                      | -                                                  | 637             | 837          | 802          | 1001        | 1304           |
|                                                             | 1143                                               | 10.90684731     | 11.55379092  | 11.63166571  |             |                |
| 15.15306137                                                 | 17.79103759                                        | 16.70541829     |              |              |             |                |
| ENSG00000124194                                             | 0                                                  | 0               | 0            | 17.07782977  | 7.310879019 |                |
|                                                             | 15.69944831                                        | 0               | 13.36271904  | -6.159065582 |             |                |
| 0.000808479                                                 | 1                                                  | GDAP1L1         | 20           | 44247099     | 44280917    |                |
| +                                                           | 3385                                               | protein_coding  | ganglioside  | induced      |             |                |
| differentiation associated protein 1 like 1 [Source:HGNC    |                                                    |                 |              |              |             |                |
| Symbol;Acc:HGNC:4213]                                       | -                                                  | 0               | 0            | 0            | 17          | 8              |
|                                                             | 16                                                 | 0               | 0            | 0.242823919  | 0.10298878  |                |
|                                                             | 0.220651734                                        |                 |              |              |             |                |
| ENSG00000163378                                             | 797.1465946                                        | 677.601284      | 620.9019943  |              |             |                |
| 369.6847857                                                 | 476.1209961                                        | 472.9458804     | 698.5499576  |              |             |                |
| 439.5838874                                                 | 0.66722104                                         | 0.000808507     | 0.009008484  |              |             | EOGT           |
| 3                                                           | 68975214                                           | 69013961        | -            | 5645         |             |                |
| protein_coding                                              | EGF domain specific O-linked N-acetylglucosamine   |                 |              |              |             |                |
| transferase [Source:HGNC                                    | Symbol;Acc:HGNC:28526]                             | -               | 689          | 731          |             |                |
|                                                             | 635                                                | 368             | 521          | 482          | 6.674980301 | 5.709359483    |
|                                                             | 5.210893952                                        | 3.151991872     | 4.021910248  | 3.985925047  |             |                |
| ENSG00000101146                                             | 2689.935896                                        | 2745.629279     | 2509.030736  |              |             |                |
| 3322.14018                                                  | 3865.627281                                        | 3532.37587      | 2648.198637  |              |             |                |
| 3573.381111                                                 | -0.432373091                                       | 0.000814498     | 0.009068629  |              |             | RAE1           |
| 20                                                          | 57351010                                           | 57379211        | +            | 5855         |             |                |
| protein_coding                                              | ribonucleic acid export 1 [Source:HGNC             |                 |              |              |             |                |
| Symbol;Acc:HGNC:9828]                                       | -                                                  | 2325            | 2962         | 2566         | 3307        | 4230           |
|                                                             | 3600                                               | 21.71654692     | 22.30448052  | 20.30169077  |             |                |
| 27.30917069                                                 | 31.48270687                                        | 28.70262634     |              |              |             |                |
| ENSG00000124243                                             | 39.33669697                                        | 83.42560268     | 89.95745429  |              |             |                |
| 201.9202226                                                 | 141.648281                                         | 179.5624401     | 70.90658465  |              |             |                |
| 174.3769812                                                 | -1.292479787                                       | 0.000819273     | 0.009115152  |              |             | BCAS4          |
| 20                                                          | 50794894                                           | 50882676        | +            | 7583         |             |                |
| protein_coding                                              | breast carcinoma amplified sequence 4 [Source:HGNC |                 |              |              |             |                |
| Symbol;Acc:HGNC:14367]                                      | -                                                  | 34              | 90           | 92           | 201         | 155            |
|                                                             | 183                                                | 0.245206836     | 0.523281537  | 0.562016709  |             |                |
| 1.281610975                                                 | 0.890736482                                        | 1.12656452      |              |              |             |                |
| ENSG00000229056                                             | 419.9770883                                        | 164.0703519     | 230.7604262  |              |             |                |
| 138.6317946                                                 | 112.4047649                                        | 107.9337071     | 271.6026221  |              |             |                |
| 119.6567556                                                 | 1.180548932                                        | 0.000820368     | 0.009120705  |              |             |                |
| AC020571.1                                                  | 2                                                  | 196260024       | 196264204    | +            | 1607        |                |
|                                                             | antisense                                          | uncharacterized | LOC101927482 | [Source:NCBI |             |                |
| gene;Acc:101927482]                                         | -                                                  | 363             | 177          | 236          | 138         | 123            |

|                        |                   |                    |                        |              |                |
|------------------------|-------------------|--------------------|------------------------|--------------|----------------|
| 110                    | 12.35337033       | 4.856141664        | 6.802970411            |              |                |
| 4.1520677              | 3.335399293       | 3.19538244         |                        |              |                |
| ENSG00000101938        | 24.29619519       | 4.634755704        | 11.73358099            | 0            |                |
| 0                      | 0                 | 13.55484396        | 0                      | 6.249634034  |                |
| 0.00082284             | 1                 | CHRD1 X            | 110673856              | 110795819    |                |
| -                      | 3920              | protein_coding     | chordin like 1         | [Source:HGNC |                |
| Symbol;Acc:HGNC:29861] | -                 | 21                 | 5                      | 12           | 0              |
| 0                      | 0.292973231       | 0.05623645         | 0.141806989            | 0            |                |
| 0                      | 0                 |                    |                        |              |                |
| ENSG00000122691        | 550.7137576       | 573.7827562        | 763.660563             |              |                |
| 342.5611737            | 425.8587029       | 391.5049923        | 629.3856923            |              |                |
| 386.641623             | 0.703013172       | 0.000823726        | 0.009151383            | TWIST1       |                |
| 7                      | 19020991          | 19117672           | -                      | 2033         |                |
| protein_coding         | twist family      | bHLH transcription | factor 1               | [Source:HGNC |                |
| Symbol;Acc:HGNC:12428] | bHLH              | 476                | 619                    | 781          | 341            |
| 399                    | 12.80454901       | 13.42416336        | 17.79574242            |              |                |
| 8.10995075             | 9.988657819       | 9.161815735        |                        |              |                |
| ENSG00000186480        | 3669.882435       | 3023.714621        | 3482.917958            |              |                |
| 2028.24343             | 2762.598409       | 2350.992385        | 3392.171672            |              |                |
| 2380.611408            | 0.510534887       | 0.000824633        | 0.0091548              | INSIG1       |                |
| 7                      | 155297776         | 155310235          | +                      | 3650         |                |
| protein_coding         | insulin induced   | gene 1             | [Source:HGNC           |              |                |
| Symbol;Acc:HGNC:6083]  | -                 | 3172               | 3262                   | 3562         | 2019           |
| 2396                   | 47.52641182       | 39.40261545        | 45.20677296            |              | 3023           |
| 26.7451274             | 36.0914126        | 30.64361414        |                        |              |                |
| ENSG00000269974        | 26.61011854       | 24.10072966        | 25.42275882            | 0            |                |
| 2.741579632            | 2.943646558       | 25.37786901        | 1.895075397            |              |                |
| 3.73107461             | 0.000828384       | 0.009189772        | AC091057.4             |              |                |
| 15                     | 30648797          | 30649529           | +                      | 733          |                |
| lincRNA                | novel transcript  | -                  | 23                     | 26           | 0              |
| 3                      | 3                 | 1.716005099        | 1.56387966             | 1.643129637  |                |
| 0                      | 0.178351135       | 0.191057159        |                        |              |                |
| ENSG00000106399        | 1308.523655       | 1289.389037        | 1215.403431            |              |                |
| 751.4245101            | 919.3430367       | 955.703916         | 1271.105374            |              |                |
| 875.4904876            | 0.537632776       | 0.000836186        | 0.009269595            | RPA3         |                |
| 7                      | 7636518           | 7718607            | -                      | 3232         | protein_coding |
| replication            | protein A3        | [Source:HGNC       | Symbol;Acc:HGNC:10291] | -            |                |
| 1131                   | 1391              | 1243               | 748                    | 1006         | 974            |
| 18.97534741            | 17.81567298       | 11.19003545        | 13.56392021            |              |                |
| 14.06804149            |                   |                    |                        |              |                |
| ENSG00000215301        | 8774.397349       | 7931.920912        | 8471.645478            |              |                |
| 6699.532163            | 6329.393511       | 6215.0191          | 8392.654579            |              |                |
| 6414.648258            | 0.38770723        | 0.000838861        | 0.009289554            | DDX3X        |                |
| X                      | 41333284          | 41364472           | +                      | 15892        |                |
| protein_coding         | DEAD-box helicase | 3 X-linked         | [Source:HGNC           |              |                |
| Symbol;Acc:HGNC:2745]  | -                 | 7584               | 8557                   | 8664         | 6669           |
| 6334                   | 26.09843591       | 23.73979332        | 25.25470751            |              | 6926           |
| 20.29006216            | 18.99164259       | 18.60567963        |                        |              |                |
| ENSG00000184432        | 4802.547916       | 4073.023313        | 4391.292687            |              |                |
| 3152.366461            | 3166.524475       | 3515.695206        | 4422.287972            |              |                |

|                        |                                                      |             |             |         |
|------------------------|------------------------------------------------------|-------------|-------------|---------|
| 3278.195381            | 0.431732353                                          | 0.000839202 | 0.009289554 | COPB2   |
| 3                      | 139355600                                            | 139389732   | - 8177      |         |
| protein_coding         | coatomer protein complex subunit beta 2 [Source:HGNC |             |             |         |
| Symbol;Acc:HGNC:2232]  | -                                                    | 4151 4394   | 4491 3138   | 3465    |
| 3583                   | 27.7621725                                           | 23.69190665 | 25.44201551 |         |
| 18.55496579            | 18.46578773                                          | 20.45496997 |             |         |
| ENSG00000124172        | 2105.67025                                           | 2530.576615 | 3056.597849 |         |
| 1537.00468             | 1442.984746                                          | 2076.252039 | 2564.281571 |         |
| 1685.413822            | 0.605791693                                          | 0.000840941 | 0.009299163 |         |
| ATP5F1E 20             | 59025467                                             | 59032382    | - 5126      |         |
| protein_coding         | ATP synthase F1 subunit epsilon [Source:HGNC         |             |             |         |
| Symbol;Acc:HGNC:838]   | -                                                    | 1820 2730   | 3126 1530   | 1579    |
| 2116                   | 19.41724001                                          | 23.48107648 | 28.24963414 |         |
| 14.43158546            | 13.42338745                                          | 19.27006135 |             |         |
| ENSG00000176170        | 3303.125584                                          | 4069.315508 | 3260.957718 |         |
| 4302.608525            | 5378.065379                                          | 5222.028995 | 3544.46627  |         |
| 4967.567633            | -0.486852315                                         | 0.000841286 | 0.009299163 | SPHK1   |
| 17                     | 76376584                                             | 76387860    | + 4416      |         |
| protein_coding         | sphingosine kinase 1 [Source:HGNC                    |             |             |         |
| Symbol;Acc:HGNC:11240] | -                                                    | 2855 4390   | 3335 4283   | 5885    |
| 5322                   | 35.35670301                                          | 43.82979239 | 34.98398107 |         |
| 46.89431822            | 58.07323244                                          | 56.25897836 |             |         |
| ENSG00000104324        | 450.0580919                                          | 466.2564238 | 434.1424968 |         |
| 159.7279373            | 296.0906003                                          | 283.5712851 | 450.1523375 |         |
| 246.4632742            | 0.868224907                                          | 0.000842327 | 0.009303936 | CPQ     |
| 8                      | 96645227                                             | 97149654    | + 3457      |         |
| protein_coding         | carboxypeptidase Q [Source:HGNC                      |             |             |         |
| Symbol;Acc:HGNC:16910] | -                                                    | 389 503     | 444 159     | 324 289 |
| 6.153822063            | 6.415087191                                          | 5.949576408 | 2.223816567 |         |
| 4.084173926            | 3.902514263                                          |             |             |         |
| ENSG00000117305        | 726.5719323                                          | 704.482867  | 700.103666  |         |
| 904.1203998            | 1269.35137                                           | 1034.201158 | 710.3861551 |         |
| 1069.224309            | -0.590349929                                         | 0.000843855 | 0.009314088 | HMGCL   |
| 1                      | 23801885                                             | 23838620    | - 5658      |         |
| protein_coding         | 3-hydroxy-3-methylglutaryl-CoA lyase [Source:HGNC    |             |             |         |
| Symbol;Acc:HGNC:5005]  | -                                                    | 628 760     | 716 900     | 1389    |
| 1054                   | 6.070038049                                          | 5.922220961 | 5.862090718 |         |
| 7.690964076            | 10.69788439                                          | 8.696083548 |             |         |
| ENSG00000213186        | 77.51643227                                          | 52.83621503 | 86.04626062 |         |
| 13.05951689            | 19.19105743                                          | 27.47403455 | 72.13296931 |         |
| 19.90820295            | 1.85586461                                           | 0.000846203 | 0.00933327  | TRIM59  |
| 3                      | 160432445                                            | 160485773   | - 7865      |         |
| protein_coding         | tripartite motif containing 59 [Source:HGNC          |             |             |         |
| Symbol;Acc:HGNC:30834] | -                                                    | 67 57       | 88 13       | 21      |
| 28                     | 0.465876483                                          | 0.319528858 | 0.518306197 |         |
| 0.079918227            | 0.116353423                                          | 0.166190173 |             |         |
| ENSG00000233608        | 231.3923351                                          | 239.1533943 | 352.0074298 |         |
| 171.782876             | 108.7493254                                          | 127.5580175 | 274.1843864 |         |
| 136.030073             | 1.012816982                                          | 0.000853312 | 0.009404889 | TWIST2  |
| 2                      | 238848032                                            | 238910543   | + 1878      |         |



|                                      |                                                                                  |             |             |             |             |       |                |
|--------------------------------------|----------------------------------------------------------------------------------|-------------|-------------|-------------|-------------|-------|----------------|
| protein_coding                       | twist family bHLH transcription factor 2 [Source:HGNC Symbol;Acc:HGNC:20670]     | bHLH        | 200         | 258         | 360         | 171   | 119            |
|                                      | 130                                                                              | 5.824103986 | 6.057007006 | 8.87992645  |             |       |                |
| 4.402524069                          | 2.761276973                                                                      | 3.231422914 |             |             |             |       |                |
| ENSG00000148335                      | 518.3188307                                                                      | 442.1556942 | 505.5217812 |             |             |       |                |
| 733.3421021                          | 687.2226278                                                                      | 803.6155104 | 488.6654354 |             |             |       |                |
| 741.3934134                          | -0.601907356                                                                     | 0.000857813 | 0.009447684 |             |             |       | NTMT1          |
| 9                                    | 129608884                                                                        | 129636131   | +           | 3029        |             |       |                |
| protein_coding                       | N-terminal Xaa-Pro-Lys N-methyltransferase 1 [Source:HGNC Symbol;Acc:HGNC:23373] |             | -           | 448         | 477         |       | 517            |
|                                      | 730                                                                              | 752         | 819         | 8.088601757 | 6.943094298 |       |                |
| 7.906672048                          | 11.65265271                                                                      | 10.81875199 | 12.62207232 |             |             |       |                |
| ENSG00000236750                      | 21.98227184                                                                      | 10.19646255 | 15.64477466 |             |             |       |                |
| 129.5905906                          | 38.38211485                                                                      | 46.11712942 | 15.94116968 |             |             |       |                |
| 71.3632783                           | -2.169069034                                                                     | 0.000866886 | 0.009536499 |             |             |       |                |
| AC009237.9                           | 2                                                                                | 95641634    | 95641980    | -           |             |       | 347            |
| processed_pseudogene                 | pseudogene similar to part of Cdon homolog (mouse) (CDON)                        | -           | 19          | 11          | 16          | 129   | 42             |
|                                      | 47                                                                               | 2.994462225 | 1.397645943 | 2.135959254 |             |       |                |
| 17.97469178                          | 5.274464982                                                                      | 6.322872421 |             |             |             |       |                |
| ENSG00000116285                      | 7349.020564                                                                      | 6671.267361 | 4817.612796 |             |             |       |                |
| 8325.944304                          | 11213.97456                                                                      | 8418.829157 | 6279.30024  |             |             |       |                |
| 9319.582672                          | -0.569800418                                                                     | 0.000867664 | 0.009536499 |             |             |       | ERRFI1         |
| 1                                    | 8004404                                                                          | 8026308     | -           | 4186        |             |       | protein_coding |
| receptor feedback inhibitor 1        | [Source:HGNC Symbol;Acc:HGNC:18185]                                              |             |             |             |             |       |                |
|                                      | -                                                                                | 6352        | 7197        | 4927        | 8288        | 12271 | 8580           |
| 82.98621907                          | 75.80297258                                                                      | 54.52375957 | 95.73081029 |             |             |       |                |
| 127.7436526                          | 95.68284934                                                                      |             |             |             |             |       |                |
| ENSG00000196576                      | 2696.877666                                                                      | 2404.511259 | 4147.820881 |             |             |       |                |
| 1943.85886                           | 1775.629742                                                                      | 2224.415583 | 3083.069936 |             |             |       |                |
| 1981.301395                          | 0.638045267                                                                      | 0.000867748 | 0.009536499 |             |             |       | PLXNB2         |
| 22                                   | 50274979                                                                         | 50307627    | -           | 7257        |             |       |                |
| protein_coding                       | plexin B2 [Source:HGNC Symbol;Acc:HGNC:9104]                                     |             | -           |             |             |       |                |
|                                      | 2331                                                                             | 2594        | 4242        | 1935        | 1943        | 2267  | 17.56628252    |
|                                      | 15.75965865                                                                      | 27.0779634  | 12.89214148 | 11.66740505 |             |       |                |
|                                      | 14.58278366                                                                      |             |             |             |             |       |                |
| ENSG00000177963                      | 2072.118361                                                                      | 2448.077963 | 2089.555215 |             |             |       |                |
| 2924.327204                          | 3012.082156                                                                      | 3053.542697 | 2203.250513 |             |             |       |                |
| 2996.650686                          | -0.443452199                                                                     | 0.000870416 | 0.00955894  |             |             |       | RIC8A          |
| 11                                   | 207511                                                                           | 215113      | +           | 6685        |             |       | protein_coding |
| guanine nucleotide exchange factor A | [Source:HGNC Symbol;Acc:HGNC:29550]                                              |             |             |             |             |       |                |
|                                      | -                                                                                | 1791        | 2641        | 2137        | 2911        |       | 3296           |
|                                      | 3112                                                                             | 14.65172933 | 17.41810674 | 14.80831235 |             |       |                |
| 21.05435834                          | 21.48544679                                                                      | 21.73122521 |             |             |             |       |                |
| ENSG00000099139                      | 370.2277362                                                                      | 125.138404  | 225.8714341 |             |             |       |                |
| 103.4715569                          | 101.4384464                                                                      | 98.12155195 | 240.4125248 |             |             |       |                |
| 101.0105184                          | 1.248564401                                                                      | 0.000874447 | 0.009596322 |             |             |       | PCSK5          |
| 9                                    | 75890644                                                                         | 76362339    | +           | 12705       |             |       |                |
| protein_coding                       | proprotein convertase subtilisin/kexin type 5 [Source:HGNC Symbol;Acc:HGNC:8747] |             | -           | 320         | 135         |       | 231            |

|                                      |                                                          |             |             |                    |          |
|--------------------------------------|----------------------------------------------------------|-------------|-------------|--------------------|----------|
| 103                                  | 111                                                      | 100         | 1.377431535 | 0.46848216         |          |
| 0.842247569                          | 0.391979877                                              |             | 0.380721065 | 0.367427253        |          |
| ENSG00000138035                      | 1184.728756                                              |             | 1332.955741 | 1241.803989        |          |
| 858.9143798                          | 881.8747817                                              |             | 919.3989417 | 1253.162828        |          |
| 886.7293678                          | 0.499305815                                              |             | 0.000878939 | 0.009638691        | PNPT1    |
| 2                                    | 55634265                                                 |             | 55693910    | - 5134             |          |
| protein_coding                       | polyribonucleotide nucleotidyltransferase 1              |             |             |                    |          |
| [Source:HGNC Symbol;Acc:HGNC:23166]  |                                                          |             | -           | 1024 1438          | 1270     |
| 855                                  | 965                                                      | 937         | 10.90784116 | 12.34914755        |          |
| 11.4590948                           | 8.052142775                                              |             | 8.190870256 | 8.51980711         |          |
| ENSG00000130479                      | 981.103501                                               |             | 1751.010705 | 1586.966829        |          |
| 2457.198331                          | 2071.720342                                              |             | 2244.039893 | 1439.693678        |          |
| 2257.652855                          | -0.648177677                                             |             | 0.000879891 | 0.00964222         | MAP1S    |
| 19                                   | 17719242                                                 |             | 17734516    | + 5040             |          |
| protein_coding                       | microtubule associated protein 1S [Source:HGNC           |             |             |                    |          |
| Symbol;Acc:HGNC:15715]               |                                                          |             | -           | 848 1889 1623 2446 | 2267     |
| 2287                                 | 9.201529622                                              |             | 16.52476832 | 14.9173074         |          |
| 23.46535521                          | 19.60106105                                              |             | 21.18271699 |                    |          |
| ENSG00000165655                      | 152.7189412                                              |             | 241.0072966 | 267.916766         |          |
| 475.165499                           | 344.5251738                                              |             | 406.2232251 | 220.5476679        |          |
| 408.637966                           | -0.886931374                                             |             | 0.000888608 | 0.009730769        | ZNF503   |
| 10                                   | 75397830                                                 |             | 75401906    | - 3347             |          |
| protein_coding                       | zinc finger protein 503 [Source:HGNC                     |             |             |                    |          |
| Symbol;Acc:HGNC:23589]               |                                                          |             | -           | 132 260 274 473    | 377      |
| 414                                  | 2.15681518                                               |             | 3.424929164 | 3.792253024        |          |
| 6.832924859                          | 4.908448465                                              |             | 5.774184606 |                    |          |
| ENSG00000254266                      | 0                                                        | 2.780853423 | 0           | 25.11445555        |          |
| 23.76035681                          | 18.64309487                                              |             | 0.926951141 |                    |          |
| 22.50596908                          | -4.528744541                                             |             | 0.000891572 | 1                  | PKIA-AS1 |
| 8                                    | 78426103                                                 |             | 78558503    | - 2656             |          |
| lincRNA                              | PKIA antisense RNA 1 [Source:HGNC Symbol;Acc:HGNC:51659] |             |             |                    |          |
| -                                    | 0                                                        | 3           | 0           | 25 26 19           | 0        |
| 0.049799748                          | 0                                                        |             | 0.455106622 | 0.426583325        |          |
| 0.333942402                          |                                                          |             |             |                    |          |
| ENSG00000104783                      | 1391.824896                                              |             | 1991.091051 | 1189.002874        |          |
| 1908.698622                          | 2652.935224                                              |             | 2661.056489 | 1523.97294         |          |
| 2407.563445                          | -0.65947527                                              |             | 0.00089465  | 0.009789922        | KCNN4    |
| 19                                   | 43766533                                                 |             | 43781261    | - 3408             |          |
| protein_coding                       | potassium calcium-activated channel subfamily N member   |             |             |                    |          |
| 4 [Source:HGNC Symbol;Acc:HGNC:6293] |                                                          |             | -           | 1203 2148          | 1216     |
| 1900                                 | 2903                                                     | 2712        | 19.30459763 | 27.78872679        |          |
| 16.52861427                          | 26.95598657                                              |             | 37.11983589 | 37.14805971        |          |
| ENSG00000027847                      | 416.5062033                                              |             | 507.042274  | 475.2100303        |          |
| 593.7057292                          | 823.3877496                                              |             | 799.6906484 | 466.2528359        |          |
| 738.9280424                          | -0.663775951                                             |             | 0.000897215 | 0.00981096         |          |
| B4GALT7                              | 5                                                        | 177600100   | 177610347   | + 4927             |          |
| protein_coding                       | "beta-1,4-galactosyltransferase 7 [Source:HGNC           |             |             |                    |          |
| Symbol;Acc:HGNC:930]"                |                                                          |             | -           | 360 547 486 591    | 901      |
| 815                                  | 3.995900368                                              |             | 4.894842498 | 4.569368283        |          |
| 5.799708088                          | 7.968944945                                              |             | 7.721845044 |                    |          |

|                                                     |                                                  |             |             |             |             |
|-----------------------------------------------------|--------------------------------------------------|-------------|-------------|-------------|-------------|
| ENSG00000130772                                     | 636.3289216                                      | 618.2764109 | 510.4107732 |             |             |
| 803.6625776                                         | 874.5639027                                      | 995.9337523 | 588.3387019 |             |             |
| 891.3867442                                         | -0.599836501                                     | 0.000900764 | 0.009839618 | MED18       |             |
| 1                                                   | 28329002                                         | 28335967    | + 2019      |             |             |
| protein_coding                                      | mediator complex subunit 18 [Source:HGNC         |             |             |             |             |
| Symbol;Acc:HGNC:25944]                              | -                                                | 550         | 667         | 522         | 800         |
| 1015                                                | 14.89776376                                      | 14.56543545 | 11.97668535 | 957         |             |
| 19.15820802                                         | 20.65542886                                      | 23.46798269 |             |             |             |
| ENSG00000055483                                     | 1898.57411                                       | 2139.403233 | 2072.932642 |             |             |
| 3328.16765                                          | 2473.818688                                      | 2814.12611  | 2036.969995 |             |             |
| 2872.037483                                         | -0.495297748                                     | 0.000901123 | 0.009839618 | USP36       |             |
| 17                                                  | 78787381                                         | 78841441    | - 9235      |             |             |
| protein_coding                                      | ubiquitin specific peptidase 36 [Source:HGNC     |             |             |             |             |
| Symbol;Acc:HGNC:20062]                              | -                                                | 1641        | 2308        | 2120        | 3313        |
| 2868                                                | 9.717765033                                      | 11.01876352 | 10.63411658 | 2707        |             |
| 17.34545724                                         | 12.77350122                                      | 14.49733862 |             |             |             |
| ENSG00000136861                                     | 1545.700799                                      | 1550.789259 | 1963.41922  |             |             |
| 1268.782294                                         | 955.8974318                                      | 1196.101718 | 1686.636426 |             |             |
| 1140.260481                                         | 0.565205375                                      | 0.000904759 | 0.009872272 |             |             |
| CDK5RAP2                                            | 9                                                | 120388869   | 120580170   | -           | 10080       |
| protein_coding                                      | CDK5 regulatory subunit associated protein 2     |             |             |             |             |
| [Source:HGNC Symbol;Acc:HGNC:18672]                 | -                                                |             | 1336        | 1673        | 2008        |
| 1263                                                | 1046                                             | 1219        | 7.248374749 | 7.317611807 |             |
| 9.227958488                                         | 6.058205974                                      | 4.521991588 | 5.645328381 |             |             |
| ENSG00000185105                                     | 0                                                | 4.634755704 | 0           | 47.21517644 |             |
| 20.1049173                                          | 16.68066383                                      | 1.544918568 |             |             |             |
| 28.00025252                                         | -4.121085697                                     | 0.000910005 | 0.009922427 |             |             |
| MYADML2                                             | 17                                               | 81939645    | 81947233    | -           | 2452        |
| protein_coding                                      | myeloid associated differentiation marker like 2 |             |             |             |             |
| [Source:HGNC Symbol;Acc:HGNC:34548]                 | -                                                | 0           | 5           | 0           |             |
| 47                                                  | 22                                               | 17          | 0           | 0.089904928 | 0           |
| 0.926784173                                         | 0.390985645                                      | 0.323649165 |             |             |             |
| ENSG00000189423                                     | 46.27846703                                      | 13.90426711 | 60.6235018  | 0           |             |
| 3.65543951                                          | 8.830939675                                      | 40.26874531 | 4.162126395 |             |             |
| 3.270957398                                         | 0.000919206                                      | 0.010015606 | USP32P3     | 17          |             |
| 20415547                                            | 20431008                                         | + 2935      |             |             |             |
| transcribed_unprocessed_pseudogene                  | ubiquitin specific peptidase                     |             |             |             |             |
| 32 pseudogene 3 [Source:HGNC Symbol;Acc:HGNC:43576] | -                                                |             |             | 40          |             |
| 15                                                  | 62                                               | 0           | 4           | 9           | 0.745326561 |
| 0.225329011                                         | 0.978556801                                      | 0           | 0.059389611 | 0.143146403 |             |
| ENSG00000126461                                     | 3168.91803                                       | 5331.822962 | 5196.020783 |             |             |
| 7036.065867                                         | 6434.487397                                      | 7059.845663 | 4565.587258 |             |             |
| 6843.466309                                         | -0.583614636                                     | 0.000921321 | 0.010031505 | SCAF1       |             |
| 19                                                  | 49642125                                         | 49658642    | + 4548      |             |             |
| protein_coding                                      | SR-related CTD associated factor 1 [Source:HGNC  |             |             |             |             |
| Symbol;Acc:HGNC:30403]                              | -                                                | 2739        | 5752        | 5314        | 7004        |
| 7195                                                | 32.9356538                                       | 55.76123441 | 54.12570297 | 7041        |             |
| 74.46066283                                         | 67.46406194                                      | 73.85099961 |             |             |             |
| ENSG00000103245                                     | 524.1036391                                      | 752.6843264 | 685.4366897 |             |             |
| 863.9372709                                         | 1116.73677                                       | 1072.468563 | 654.0748851 |             |             |

|                                                         |                                                 |                |                             |       |
|---------------------------------------------------------|-------------------------------------------------|----------------|-----------------------------|-------|
| 1017.714201                                             | -0.636810821                                    | 0.000929271    | 0.010110867                 | CIA03 |
| 16                                                      | 729753 741329                                   | - 8101         | protein_coding              |       |
| cytosolic iron-sulfur assembly component 3 [Source:HGNC |                                                 |                |                             |       |
| Symbol;Acc:HGNC:14179]                                  | -                                               | 453 812        | 701 860                     | 1222  |
| 1093                                                    | 3.058118307                                     | 4.419278334    | 4.008499572                 |       |
| 5.132879107                                             | 6.573416816                                     | 6.298361237    |                             |       |
| ENSG00000143494                                         | 267.2581471                                     | 288.2818048    | 387.2081728                 |       |
| 194.8881751                                             | 162.6670582                                     | 154.0508366    | 314.2493749                 |       |
| 170.5353566                                             | 0.882868987                                     | 0.00093121     | 0.010124757                 | VASH2 |
| 1                                                       | 212950520                                       | 212992037      | + 9086                      |       |
| protein_coding                                          | vasohibin 2 [Source:HGNC Symbol;Acc:HGNC:25723] |                |                             | -     |
| 231                                                     | 311 396                                         | 194 178        | 157 1.390381435             |       |
| 1.509112494                                             | 2.018946958                                     | 1.03235773     | 0.853701152                 |       |
| 0.806627373                                             |                                                 |                |                             |       |
| ENSG00000135111                                         | 1243.733801                                     | 1046.527838    | 1639.767944                 |       |
| 890.0563047                                             | 724.6908828                                     | 909.5867865    | 1310.009861                 |       |
| 841.444658                                              | 0.638846725                                     | 0.000932913    | 0.010136058                 | TBX3  |
| 12                                                      | 114670254                                       | 114684164      | - 5950                      |       |
| protein_coding                                          | T-box 3 [Source:HGNC Symbol;Acc:HGNC:11602]     |                |                             | T-box |
| 1075                                                    | 1129 1677                                       | 886 793        | 927 9.880665826             |       |
| 8.365866581                                             | 13.05625287                                     | 7.19975922     | 5.807842352                 |       |
| 7.272919896                                             |                                                 |                |                             |       |
| ENSG00000135334                                         | 1178.943948                                     | 1208.744288    | 1118.601388                 |       |
| 1596.274795                                             | 2106.447017                                     | 1461.029908    | 1168.763208                 |       |
| 1721.250574                                             | -0.558700705                                    | 0.000935046    | 0.010152027                 |       |
| AKIRIN2 6                                               | 87675072                                        | 87702209       | - 1999                      |       |
| protein_coding                                          | akirin 2 [Source:HGNC Symbol;Acc:HGNC:21407]    |                |                             | -     |
| 1019                                                    | 1304 1144                                       | 1589 2305      | 1489 27.87764623            |       |
| 28.76065386                                             | 26.51036371                                     | 38.43371095    | 50.24776316                 |       |
| 34.77186137                                             |                                                 |                |                             |       |
| ENSG00000087589                                         | 19.66834849                                     | 12.05036483    | 6.844588913                 | 0     |
| 0                                                       | 0 12.85443408                                   | 0              | 6.174739526                 |       |
| 0.000936773                                             | 1 CASS4                                         | 20 56412112    | 56460387                    |       |
| +                                                       | 5069                                            | protein_coding | Cas scaffold protein family |       |
| member 4 [Source:HGNC Symbol;Acc:HGNC:15878]            | -                                               | 17             | 13                          |       |
| 7                                                       | 0 0                                             | 0 0.183409296  | 0.113071986                 |       |
| 0.063970273                                             | 0                                               | 0              | 0                           |       |
| ENSG00000278540                                         | 2529.118223                                     | 2571.362465    | 3788.968863                 |       |
| 2401.946529                                             | 1501.471779                                     | 1736.751469    | 2963.14985                  |       |
| 1880.056592                                             | 0.656646826                                     | 0.000943159    | 0.010232835                 | ACACA |
| 17                                                      | 37084988                                        | 37406818       | - 13008                     |       |
| protein_coding                                          | acetyl-CoA carboxylase alpha [Source:HGNC       |                |                             |       |
| Symbol;Acc:HGNC:84]                                     | -                                               | 2186 2774      | 3875 2391                   | 1643  |
| 1770                                                    | 9.190398481                                     | 9.402208689    | 13.79950901                 |       |
| 8.887308674                                             | 5.504091347                                     | 6.351974909    |                             |       |
| ENSG00000129675                                         | 2006.171546                                     | 1476.633167    | 1614.345185                 |       |
| 971.4271407                                             | 1155.118885                                     | 1297.166917    | 1699.049966                 |       |
| 1141.237647                                             | 0.573533866                                     | 0.000943956    | 0.010234223                 |       |
| ARHGEF6 X                                               | 136665547                                       | 136782088      | - 6434                      |       |
| protein_coding                                          | Rac/Cdc42 guanine nucleotide exchange factor 6  |                |                             |       |

|                                              |                                        |                |             |             |
|----------------------------------------------|----------------------------------------|----------------|-------------|-------------|
| [Source:HGNC Symbol;Acc:HGNC:685]            | -                                      | 1734           | 1593        | 1651        |
| 967                                          | 1264                                   | 1322           | 14.73882116 | 10.91612945 |
| 11.88689626                                  | 7.266857334                            | 8.561002328    | 9.591718719 |             |
| ENSG00000152620                              | 1541.072952                            | 1343.152203    | 1315.13887  |             |
| 769.5069181                                  | 1048.197279                            | 1017.520494    | 1399.788008 |             |
| 945.0748971                                  | 0.566098839                            | 0.000944638    | 0.010234356 | NADK2       |
| 5                                            | 36192592                               | 36242279       | -           | 4885        |
| protein_coding                               | "NAD kinase 2, mitochondrial           | [Source:HGNC   |             |             |
| Symbol;Acc:HGNC:26404]"                      | -                                      | 1332           | 1449        | 1345        |
| 1037                                         | 14.91194762                            | 13.07789287    | 12.75440408 | 1147        |
| 7.581679439                                  | 10.23192734                            | 9.909693543    |             |             |
| ENSG00000104976                              | 671.0377719                            | 997.3994276    | 898.5967445 |             |
| 1252.709043                                  | 1222.744516                            | 1409.025486    | 855.6779813 |             |
| 1294.826348                                  | -0.596457764                           | 0.000946113    | 0.010243079 | SNAPC2      |
| 19                                           | 7920316                                | 7923250        | +           | 2000        |
| nuclear RNA activating complex polypeptide 2 | [Source:HGNC                           |                |             |             |
| Symbol;Acc:HGNC:11135]"                      | -                                      | 580            | 1076        | 919         |
| 1436                                         | 15.85961757                            | 23.7200846     | 21.2857017  | 1338        |
| 30.14655389                                  | 29.1530982                             | 33.51741217    |             |             |
| ENSG00000198774                              | 150.4050178                            | 196.5136419    | 117.3358099 |             |
| 59.2701151                                   | 72.19493032                            | 69.66630188    | 154.7514899 |             |
| 67.04378243                                  | 1.20684661                             | 0.000948281    | 0.010259284 | RASSF9      |
| 12                                           | 85800697                               | 85836570       | -           | 5682        |
| protein_coding                               | Ras association domain family member 9 | [Source:HGNC   |             |             |
| Symbol;Acc:HGNC:15739]"                      | -                                      | 130            | 212         | 120         |
| 71                                           | 1.251229098                            | 1.645010179    | 0.97832347  | 59          |
| 0.502055812                                  | 0.605876991                            | 0.583315014    |             | 79          |
| ENSG00000113552                              | 1688.007085                            | 1497.953044    | 1168.469107 |             |
| 2092.536436                                  | 2301.099171                            | 1956.543746    | 1451.476412 |             |
| 2116.726451                                  | -0.544847023                           | 0.000953446    | 0.010307874 | GNPDA1      |
| 5                                            | 141991749                              | 142013041      | -           | 3961        |
| protein_coding                               | glucosamine-6-phosphate deaminase 1    | [Source:HGNC   |             |             |
| Symbol;Acc:HGNC:4417]"                       | -                                      | 1459           | 1616        | 1195        |
| 1994                                         | 20.14397446                            | 17.98748613    | 13.97544092 | 2083        |
| 25.42644503                                  | 27.70189515                            | 23.49991803    |             | 2518        |
| ENSG00000124104                              | 333.2049626                            | 420.8358179    | 430.2313031 |             |
| 541.4676617                                  | 625.0801562                            | 749.6486569    | 394.7573612 |             |
| 638.7321582                                  | -0.693122024                           | 0.000954861    | 0.010315878 | SNX21       |
| 20                                           | 45833810                               | 45843275       | +           | 4066        |
| protein_coding                               | sorting nexin family member 21         | [Source:HGNC   |             |             |
| Symbol;Acc:HGNC:16154]"                      | -                                      | 288            | 454         | 440         |
| 764                                          | 3.873645079                            | 4.922916126    | 5.012885189 | 539         |
| 6.409477206                                  | 7.330731704                            | 8.771462684    |             | 684         |
| ENSG00000204131                              | 2.313923351                            | 3.707804563    | 39.11193665 | 0           |
| 0                                            | 0                                      | 15.04455485    | 0           | 6.406133885 |
| 0.000957438                                  | 1                                      | NHSL2          | X           | 71910818    |
| +                                            | 17706                                  | protein_coding | NHS like 2  | 72161750    |
| Symbol;Acc:HGNC:33737]"                      | -                                      | 2              | 4           | 40          |
| 0                                            | 0.006177379                            | 0.009960325    | 0.104650664 | 0           |
| 0                                            | 0                                      |                |             | 0           |

|                 |                                                                                          |             |             |           |       |
|-----------------|------------------------------------------------------------------------------------------|-------------|-------------|-----------|-------|
| ENSG0000068697  | 2652.913122                                                                              | 2400.803455 | 2445.473839 |           |       |
| 1668.604427     | 1949.263119                                                                              | 1872.159211 | 2499.730139 |           |       |
| 1830.008919     | 0.449607601                                                                              | 0.000959142 | 0.010354801 |           |       |
| LAPTM4A 2       | 20032650                                                                                 | 20052028    | -           | 1946      |       |
| protein_coding  | lysosomal protein transmembrane 4 alpha [Source:HGNC Symbol;Acc:HGNC:6924]               | -           | 2293 2590   | 2501 1661 | 2133  |
| 1908            | 64.44005932                                                                              | 58.68010552 | 59.53513073 |           |       |
| 41.26938652     | 47.76465192                                                                              | 45.77006933 |             |           |       |
| ENSG00000119471 | 1058.619933                                                                              | 1055.797349 | 1037.44412  |           |       |
| 695.1681296     | 776.7808958                                                                              | 736.8928551 | 1050.620467 |           |       |
| 736.2806269     | 0.512697944                                                                              | 0.00096464  | 0.010406815 |           | HSDL2 |
| 9               | 112379937                                                                                | 112472410   | +           | 3455      |       |
| protein_coding  | hydroxysteroid dehydrogenase like 2 [Source:HGNC Symbol;Acc:HGNC:18572]                  | -           | 915 1139    | 1061 692  | 850   |
| 751             | 14.48330762                                                                              | 14.53481908 | 14.22557363 |           |       |
| 9.684099862     | 10.72085622                                                                              | 10.14700609 |             |           |       |
| ENSG00000204619 | 1156.961676                                                                              | 1235.625871 | 1060.911282 |           |       |
| 1562.119135     | 1838.686073                                                                              | 1505.184607 | 1151.166276 |           |       |
| 1635.329938     | -0.50658064                                                                              | 0.000965439 | 0.010408084 |           |       |
| PPP1R11 6       | 30066709                                                                                 | 30070333    | +           | 2538      |       |
| protein_coding  | protein phosphatase 1 regulatory inhibitor subunit 11 [Source:HGNC Symbol;Acc:HGNC:9285] | -           | 1000 1333   | 1085      |       |
| 1555            | 2012 1534                                                                                | 21.54780789 | 23.15647714 |           |       |
| 19.80343723     | 29.62374714                                                                              | 34.54577629 | 28.21498201 |           |       |
| ENSG00000162636 | 2269.958808                                                                              | 2237.660054 | 2175.601476 |           |       |
| 1710.796712     | 1697.951652                                                                              | 1504.203391 | 2227.740113 |           |       |
| 1637.650585     | 0.443868486                                                                              | 0.000974315 | 0.010493074 |           |       |
| FAM102B 1       | 108560089                                                                                | 108644900   | +           | 9355      |       |
| protein_coding  | family with sequence similarity 102 member B [Source:HGNC Symbol;Acc:HGNC:27637]         | -           | 1962 2414   | 2225      |       |
| 1703            | 1858 1533                                                                                | 11.46964362 | 11.37699145 |           |       |
| 11.01764258     | 8.801811686                                                                              | 8.654869334 | 7.649699915 |           |       |
| ENSG00000123374 | 1257.617342                                                                              | 1227.28331  | 1421.718897 |           |       |
| 699.1864425     | 1069.216057                                                                              | 783.9912001 | 1302.206516 |           |       |
| 850.7978997     | 0.613634271                                                                              | 0.000974695 | 0.010493074 |           | CDK2  |
| 12              | 55966769                                                                                 | 55972784    | +           | 3894      |       |
| protein_coding  | cyclin dependent kinase 2 [Source:HGNC Symbol;Acc:HGNC:1771]                             | -           | 1087 1324   | 1454 696  | 1170  |
| 799             | 15.26610727                                                                              | 14.99084093 | 17.29700517 |           |       |
| 8.642004914     | 13.09328172                                                                              | 9.578485981 |             |           |       |
| ENSG00000162396 | 252.2176453                                                                              | 317.0172902 | 275.7391534 |           |       |
| 566.5821172     | 475.2071363                                                                              | 387.5801302 | 281.6580296 |           |       |
| 476.4564612     | -0.757179189                                                                             | 0.00099412  | 0.010694658 |           | PARS2 |
| 1               | 54756898                                                                                 | 54764514    | -           | 2347      |       |
| protein_coding  | "prolyl-tRNA synthetase 2, mitochondrial [Source:HGNC Symbol;Acc:HGNC:30563]"            | -           | 218 342     | 282 564   | 520   |
| 395             | 5.079700614                                                                              | 6.424613034 | 5.565939412 |           |       |
| 11.61895931     | 9.654923828                                                                              | 7.85651677  |             |           |       |
| ENSG00000119203 | 2621.675157                                                                              | 2113.448601 | 2343.782804 |           |       |
| 1578.192387     | 1831.375194                                                                              | 1673.953676 | 2359.635521 |           |       |

|                                                                       |              |                      |             |                       |
|-----------------------------------------------------------------------|--------------|----------------------|-------------|-----------------------|
| 1694.507086                                                           | 0.477226491  | 0.000995815          | 0.010705361 | CPSF3                 |
| 2                                                                     | 9423568      | 9473101 +            | 3769        | protein_coding        |
| cleavage and polyadenylation specific factor 3 [Source:HGNC           |              |                      |             |                       |
| Symbol;Acc:HGNC:2326]                                                 | -            | 2266                 | 2280        | 2397 1571 2004        |
| 1706                                                                  | 32.87974804  | 26.67120685          | 29.46078756 |                       |
| 20.1535364                                                            | 23.17022107  | 21.12997218          |             |                       |
| ENSG00000176054                                                       | 3.470885027  | 19.46597396          | 16.62257307 | 0                     |
| 0                                                                     | 0            | 13.18647735          | 0           | 6.217412469           |
| 0.000996097                                                           | 1            | RPL23P2              | 21          | 28997613 28998033     |
| -                                                                     | 421          | processed_pseudogene |             | ribosomal protein L23 |
| pseudogene 2 [Source:HGNC Symbol;Acc:HGNC:10324]                      |              |                      |             |                       |
| 21                                                                    | 17           | 0                    | 0           | 0.38970311            |
| 2.199232561                                                           | 1.870549827  | 0                    | 0           | 0                     |
| ENSG00000136960                                                       | 143.4632478  | 123.2845017          | 177.9593117 |                       |
| 51.23348932                                                           | 43.86527412  | 85.36575019          | 148.2356871 |                       |
| 60.15483788                                                           | 1.302068221  | 0.000997198          | 0.010712698 | ENPP2                 |
| 8                                                                     | 119557086    | 119673453            | -           | 6729                  |
| protein_coding ectonucleotide pyrophosphatase/phosphodiesterase 2     |              |                      |             |                       |
| [Source:HGNC Symbol;Acc:HGNC:3357]                                    |              |                      |             |                       |
| 51                                                                    | 48           | 87                   | 1.007780312 | 0.871435144           |
| 1.252919924                                                           | 0.366455179  | 0.31084888           | 0.603552093 |                       |
| ENSG00000117597                                                       | 2929.426963  | 2753.044888          | 2244.047365 |                       |
| 4126.807336                                                           | 3654.52565   | 3344.963706          | 2642.173072 |                       |
| 3708.765564                                                           | -0.489381302 | 0.00100396           | 0.01077777  | UTP25                 |
| 1                                                                     | 209828007    | 209857565            | +           | 10376                 |
| protein_coding "UTP25, small subunit processor component [Source:HGNC |              |                      |             |                       |
| Symbol;Acc:HGNC:28440]"                                               |              |                      |             |                       |
| 3409                                                                  | 13.34530338  | 12.62003165          | 10.24601961 |                       |
| 19.14263367                                                           | 16.79500118  | 15.33709381          |             |                       |
| ENSG00000105137                                                       | 2210.953762  | 3096.943762          | 3094.731987 |                       |
| 3819.4064                                                             | 3960.668709  | 4145.63557           | 2800.876504 |                       |
| 3975.236893                                                           | -0.504733875 | 0.001009397          | 0.010828523 | SYDE1                 |
| 19                                                                    | 15107403     | 15114988             | +           | 3965                  |
| protein_coding synapse defective Rho GTPase homolog 1 [Source:HGNC    |              |                      |             |                       |
| Symbol;Acc:HGNC:25824]                                                |              |                      |             |                       |
| 4225                                                                  | 26.3579851   | 37.15072059          | 36.97711113 |                       |
| 46.36285133                                                           | 47.63260276  | 49.74272321          |             |                       |
| ENSG00000116489                                                       | 10588.51326  | 7964.364202          | 7856.610274 |                       |
| 5919.979462                                                           | 7102.518967  | 5650.820177          | 8803.162577 |                       |
| 6224.439535                                                           | 0.499893404  | 0.001011189          | 0.010840145 | CAPZA1                |
| 1                                                                     | 112619173    | 112671619            | +           | 4130                  |
| protein_coding capping actin protein of muscle Z-line subunit alpha 1 |              |                      |             |                       |
| [Source:HGNC Symbol;Acc:HGNC:1488]                                    |              |                      |             |                       |
| 5893                                                                  | 7772         | 5759                 | 121.1882942 | 91.72298391           |
| 90.12354893                                                           | 68.99023209  | 82.00518978          | 65.09431523 |                       |
| ENSG00000144655                                                       | 461.6277086  | 588.6139744          | 501.6105875 |                       |
| 646.948375                                                            | 832.5263483  | 1015.558063          | 517.2840902 |                       |
| 831.6775953                                                           | -0.684396407 | 0.001016067          | 0.010884804 | CSRNP1                |
| 3                                                                     | 39141855     | 39154562             | -           | 3214                  |
| protein_coding cysteine and serine rich nuclear protein 1             |              |                      |             |                       |

|                                     |                                                  |                |                              |                |
|-------------------------------------|--------------------------------------------------|----------------|------------------------------|----------------|
| [Source:HGNC Symbol;Acc:HGNC:14300] | -                                                | 399            | 635                          | 513            |
| 644                                 | 911                                              | 1035           | 6.789248984                  | 8.710875584    |
| 7.3939064                           | 9.688157967                                      | 12.35182421    | 15.03282193                  |                |
| ENSG00000136770                     | 643.2706917                                      | 647.0118963    | 674.6809072                  |                |
| 424.9365879                         | 450.5329196                                      | 434.6784751    | 654.9878317                  |                |
| 436.7159942                         | 0.584724581                                      | 0.001018669    | 0.010905042                  | DNAJC1         |
| 10                                  | 21756537                                         | 22003769       | -                            | 2501           |
| protein_coding                      | DnaJ heat shock protein family (Hsp40) member C1 |                |                              |                |
| [Source:HGNC Symbol;Acc:HGNC:20090] | MYB                                              | 556            | 698                          | 690            |
| 423                                 | 493                                              | 443            | 12.15782289                  | 12.30483201    |
| 12.78020602                         | 8.177638196                                      | 8.589973525    | 8.268677818                  |                |
| ENSG00000137507                     | 64.78985384                                      | 12.97731597    | 54.75671131                  |                |
| 11.05036044                         | 2.741579632                                      | 0              | 44.17462704                  | 4.597313358    |
| 3.270049473                         | 0.001020158                                      | 0.010913336    | LRRRC32                      | 11             |
| 76657524                            | 76670747                                         | -              | 4459                         | protein_coding |
| leucine rich repeat containing 32   | [Source:HGNC                                     |                |                              |                |
| Symbol;Acc:HGNC:4161]               | -                                                | 56             | 14                           | 56             |
| 0                                   | 0.686823691                                      | 0.138428184    | 0.581772261                  | 11             |
| 0.119276924                         | 0.029318543                                      | 0              |                              | 3              |
| ENSG00000186197                     | 1.156961676                                      | 25.95463194    | 15.64477466                  | 0              |
| 0                                   | 0                                                | 14.25212276    | 0                            | 6.330053659    |
| 0.001021707                         | 1                                                | EDARADD 1      | 236348257                    | 236502915      |
| +                                   | 3985                                             | protein_coding | EDAR associated death domain |                |
| [Source:HGNC Symbol;Acc:HGNC:14341] | -                                                | 1              | 28                           | 16             |
| 0                                   | 0                                                | 0              | 0.013723547                  | 0.309787339    |
| 0.185991935                         | 0                                                | 0              | 0                            |                |
| ENSG00000114166                     | 372.5416596                                      | 443.0826453    | 404.8085443                  |                |
| 225.0255217                         | 257.7084854                                      | 256.0972506    | 406.8109497                  |                |
| 246.2770859                         | 0.724467972                                      | 0.001022757    | 0.010933483                  | KAT2B          |
| 3                                   | 20040023                                         | 20154404       | +                            | 5634           |
| protein_coding                      | lysine acetyltransferase 2B [Source:HGNC         |                |                              |                |
| Symbol;Acc:HGNC:8638]               | -                                                | 322            | 478                          | 414            |
| 261                                 | 3.125602473                                      | 3.740632234    | 3.403971806                  | 224            |
| 1.922349691                         | 2.181176769                                      | 2.162567642    |                              | 282            |
| ENSG00000100442                     | 833.0124065                                      | 743.414815     | 694.2368755                  |                |
| 501.2845328                         | 477.9487159                                      | 534.7624581    | 756.8880323                  |                |
| 504.6652356                         | 0.584363392                                      | 0.001030616    | 0.010992586                  | FKBP3          |
| 14                                  | 45115600                                         | 45135319       | -                            | 2262           |
| protein_coding                      | FK506 binding protein 3 [Source:HGNC             |                |                              |                |
| Symbol;Acc:HGNC:3719]               | -                                                | 720            | 802                          | 710            |
| 545                                 | 17.40742804                                      | 15.63204245    | 14.54012714                  | 499            |
| 10.66618622                         | 10.07552502                                      | 11.24734295    |                              | 523            |
| ENSG00000110955                     | 11636.72053                                      | 11909.46826    | 13542.50806                  |                |
| 8859.37534                          | 9660.412764                                      | 9681.653531    | 12362.89895                  |                |
| 9400.480545                         | 0.395227097                                      | 0.001031356    | 0.010992586                  |                |
| ATP5F1B 12                          | 56638175                                         | 56646068       | -                            | 2322           |
| protein_coding                      | ATP synthase F1 subunit beta [Source:HGNC        |                |                              |                |
| Symbol;Acc:HGNC:830]                | -                                                | 10058          | 12848                        | 13850          |
| 9867                                | 236.8885822                                      | 243.953622     | 276.3058079                  | 8819           |
| 183.6362196                         | 198.3866551                                      | 198.3667823    |                              | 10571          |



|                                                         |                                            |             |                |        |
|---------------------------------------------------------|--------------------------------------------|-------------|----------------|--------|
| ENSG00000176136                                         | 2.313923351                                | 28.73548537 | 22.48936357    |        |
| 98.44866576                                             | 56.6593124                                 | 90.27182779 | 17.84625743    |        |
| 81.79326865                                             | -2.181423572                               | 0.001031411 | 0.010992586    | MC5R   |
| 18                                                      | 13824149                                   | 13827323    | + 1906         |        |
| protein_coding                                          | melanocortin 5 receptor [Source:HGNC       |             |                |        |
| Symbol;Acc:HGNC:6933]                                   | -                                          | 2 31        | 23 98          | 62     |
| 92                                                      | 0.057385453                                | 0.717088496 | 0.558994321    |        |
| 2.486018727                                             | 1.417514111                                | 2.253258235 |                |        |
| ENSG00000111863                                         | 506.749214                                 | 715.6062807 | 292.3617264    |        |
| 766.4931834                                             | 996.1072664                                | 992.0088902 | 504.9057404    |        |
| 918.2031133                                             | -0.862509484                               | 0.001031465 | 0.010992586    | ADTRP  |
| 6                                                       | 11712054                                   | 11807046    | - 4150         |        |
| protein_coding                                          | androgen dependent TFPI regulating protein |             |                |        |
| [Source:HGNC Symbol;Acc:HGNC:21214]                     | -                                          | 438         | 772            | 299    |
| 763                                                     | 1090 1011                                  | 5.771925628 | 8.201686438    |        |
| 3.337532838                                             | 8.889506621                                | 11.44555875 | 11.37232061    |        |
| ENSG00000078902                                         | 1153.490791                                | 1169.81234  | 1027.666135    |        |
| 1465.679626                                             | 1710.745691                                | 1528.733779 | 1116.989755    |        |
| 1568.386365                                             | -0.489902896                               | 0.001031881 | 0.010992586    | TOLLIP |
| 11                                                      | 1274371 1309654                            | - 5983      | protein_coding | toll   |
| interacting protein [Source:HGNC Symbol;Acc:HGNC:16476] | -                                          |             |                | 997    |
| 1262                                                    | 1051 1459                                  | 1872 1558   | 9.113199302    |        |
| 9.299815016                                             | 8.137409451                                | 11.79064342 | 13.63469537    |        |
| 12.15610622                                             |                                            |             |                |        |
| ENSG00000081760                                         | 608.5618414                                | 490.3571535 | 731.3932153    |        |
| 311.4192488                                             | 388.3904479                                | 409.1668716 | 610.1040701    |        |
| 369.6588561                                             | 0.722381136                                | 0.001038809 | 0.011058689    | AACS   |
| 12                                                      | 125065379                                  | 125143333   | + 16094        |        |
| protein_coding                                          | acetoacetyl-CoA synthetase [Source:HGNC    |             |                |        |
| Symbol;Acc:HGNC:21298]                                  | -                                          | 526 529     | 748 310        | 425    |
| 417                                                     | 1.787378213                                | 1.449191016 | 2.152980303    |        |
| 0.931319965                                             | 1.150756749                                | 1.209534036 |                |        |
| ENSG00000198393                                         | 885.0756819                                | 860.2106587 | 869.262792     |        |
| 1295.905906                                             | 1241.935573                                | 1142.134865 | 871.5163775    |        |
| 1226.658781                                             | -0.493237723                               | 0.001044155 | 0.01110303     | ZNF26  |
| 12                                                      | 132986365                                  | 133032952   | + 20863        |        |
| protein_coding                                          | zinc finger protein 26 [Source:HGNC        |             |                |        |
| Symbol;Acc:HGNC:13053]                                  | zf-C2H2                                    | 765 928     | 889 1290       | 1359   |
| 1164                                                    | 2.005300166                                | 1.961124549 | 1.973910507    |        |
| 2.989607461                                             | 2.838581032                                | 2.604487384 |                |        |
| ENSG00000155090                                         | 3223.295229                                | 2595.463194 | 2303.693068    |        |
| 3936.942052                                             | 4567.471667                                | 3313.564809 | 2707.48383     |        |
| 3939.326176                                             | -0.54138932                                | 0.001044427 | 0.01110303     | KLF10  |
| 8                                                       | 102648779                                  | 102655902   | - 4003         |        |
| protein_coding                                          | Kruppel like factor 10 [Source:HGNC        |             |                |        |
| Symbol;Acc:HGNC:11810]                                  | zf-C2H2                                    | 2786 2800   | 2356 3919      | 4998   |
| 3377                                                    | 38.06187991                                | 30.83943403 | 27.26416189    |        |
| 47.33592737                                             | 54.40881402                                | 39.38143221 |                |        |
| ENSG00000100485                                         | 962.5921142                                | 747.1226195 | 810.594887     |        |
| 581.6507906                                             | 593.0950604                                | 461.1712942 | 840.1032069    |        |

|                                     |                                                       |             |             |                         |
|-------------------------------------|-------------------------------------------------------|-------------|-------------|-------------------------|
| 545.305715                          | 0.622649248                                           | 0.001045252 | 0.011104073 | SOS2                    |
| 14                                  | 50117120                                              | 50231558    | - 6938      |                         |
| protein_coding                      | SOS Ras/Rho guanine nucleotide exchange factor 2      |             |             |                         |
| [Source:HGNC Symbol;Acc:HGNC:11188] | -                                                     | 832         | 806         | 829                     |
| 579                                 | 649                                                   | 470         | 6.558186208 | 5.121942566             |
| 5.535064561                         | 4.035018077                                           | 4.076326845 | 3.16234755  |                         |
| ENSG00000155368                     | 1258.774303                                           | 1268.996112 | 1611.41179  |                         |
| 821.7449856                         | 786.8333545                                           | 1110.735968 | 1379.727402 |                         |
| 906.4381027                         | 0.606410826                                           | 0.00104611  | 0.011105475 | DBI                     |
| 2                                   | 119366921                                             | 119372560   | + 2509      |                         |
| protein_coding                      | "diazepam binding inhibitor, acyl-CoA binding protein |             |             |                         |
| [Source:HGNC Symbol;Acc:HGNC:2690]" | -                                                     | 1088        | 1369        | 1648                    |
| 818                                 | 861                                                   | 1132        | 23.71499005 | 24.05673836             |
| 30.42699071                         | 15.76354384                                           | 14.9541278  | 21.06162138 |                         |
| ENSG00000175455                     | 4539.917616                                           | 3728.197488 | 3775.279685 |                         |
| 3244.787657                         | 2399.796038                                           | 2887.717274 | 4014.46493  |                         |
| 2844.100323                         | 0.497179808                                           | 0.001047454 | 0.011107663 | CCDC14                  |
| 3                                   | 123897305                                             | 123961408   | - 11423     |                         |
| protein_coding                      | coiled-coil domain containing 14 [Source:HGNC         |             |             |                         |
| Symbol;Acc:HGNC:25766]              | -                                                     | 3924        | 4022        | 3861 3230 2626          |
| 2943                                | 18.78639868                                           | 15.52372167 | 15.65748775 |                         |
| 13.6717328                          | 10.01781812                                           | 12.02696705 |             |                         |
| ENSG00000126368                     | 315.8505375                                           | 418.0549645 | 271.8279597 |                         |
| 530.4173012                         | 543.7466271                                           | 585.7856651 | 335.2444872 |                         |
| 553.3165311                         | -0.721961614                                          | 0.001047769 | 0.011107663 | NR1D1                   |
| 17                                  | 40092787                                              | 40100725    | - 2772      |                         |
| protein_coding                      | nuclear receptor subfamily 1 group D member 1         |             |             |                         |
| [Source:HGNC Symbol;Acc:HGNC:7962]  |                                                       | THR-like    | 273         | 451                     |
| 278                                 | 528                                                   | 595         | 597         | 5.385972527 7.173271586 |
| 4.64573064                          | 9.209624284                                           | 9.353676326 | 10.05372822 |                         |
| ENSG00000145425                     | 22241.43125                                           | 18361.0482  | 18491.14585 |                         |
| 23071.14345                         | 29164.01027                                           | 28326.71083 | 19697.8751  |                         |
| 26853.95485                         | -0.447155159                                          | 0.001048624 | 0.011109016 | RPS3A                   |
| 4                                   | 151099573                                             | 151104652   | + 2341      |                         |
| protein_coding                      | ribosomal protein S3A [Source:HGNC                    |             |             |                         |
| Symbol;Acc:HGNC:10421]              | -                                                     | 19224       | 19808       | 18911 22966 31913       |
| 28869                               | 449.0937973                                           | 373.0552633 | 374.2101273 |                         |
| 474.3349912                         | 594.0524841                                           | 575.6736652 |             |                         |
| ENSG00000165525                     | 904.7440304                                           | 746.1956684 | 781.2609345 |                         |
| 590.6919945                         | 519.0724104                                           | 512.1945012 | 810.7335444 |                         |
| 540.6529687                         | 0.584062138                                           | 0.001050895 | 0.011125367 | NEMF                    |
| 14                                  | 49782083                                              | 49853203    | - 9426      |                         |
| protein_coding                      | nuclear export mediator factor [Source:HGNC           |             |             |                         |
| Symbol;Acc:HGNC:10663]              | -                                                     | 782         | 805         | 799 588 568             |
| 522                                 | 4.537054858                                           | 3.765324437 | 3.92664645  |                         |
| 3.016137297                         | 2.62590795                                            | 2.585169976 |             |                         |
| ENSG00000134815                     | 1081.759167                                           | 1445.116829 | 1187.047277 |                         |
| 1996.096927                         | 1613.876544                                           | 1776.981306 | 1237.974424 |                         |
| 1795.651592                         | -0.535772822                                          | 0.001052841 | 0.011138254 | DHX34                   |
| 19                                  | 47349281                                              | 47382704    | + 5696      |                         |

|                        |                                               |                |                            |             |        |
|------------------------|-----------------------------------------------|----------------|----------------------------|-------------|--------|
| protein_coding         | DExH-box helicase 34 [Source:HGNC             |                |                            |             |        |
| Symbol;Acc:HGNC:16719] | -                                             | 935            | 1559                       | 1214        | 1987   |
| 1811                   | 8.977105787                                   | 12.06729952    | 9.873046033                |             | 1766   |
| 16.86666049            | 13.51074559                                   | 14.84207102    |                            |             |        |
| ENSG00000148737        | 365.5998895                                   | 363.3648472    | 471.2988366                |             |        |
| 253.1537119            | 199.2214533                                   | 248.2475264    | 400.0878578                |             |        |
| 233.5408972            | 0.777553542                                   | 0.001059072    | 0.011189527                |             | TCF7L2 |
| 10                     | 112950250                                     | 113167678      | +                          | 6736        |        |
| protein_coding         | transcription factor 7 like 2 [Source:HGNC    |                |                            |             |        |
| Symbol;Acc:HGNC:11641] | HMG                                           | 316            | 392                        | 482         | 252    |
| 253                    | 2.565545474                                   | 2.565771321    | 3.314724326                |             | 218    |
| 1.808838024            | 1.410304894                                   | 1.753333289    |                            |             |        |
| ENSG00000128512        | 1196.298373                                   | 1178.1549      | 1017.888151                |             |        |
| 1798.195017            | 1496.902479                                   | 1522.846486    | 1130.780475                |             |        |
| 1605.981328            | -0.506207461                                  | 0.001059151    | 0.011189527                |             | DOCK4  |
| 7                      | 111726110                                     | 112206411      | -                          | 11499       |        |
| protein_coding         | dedicator of cytokinesis 4 [Source:HGNC       |                |                            |             |        |
| Symbol;Acc:HGNC:19192] | -                                             | 1034           | 1271                       | 1041        | 1790   |
| 1552                   | 4.917622391                                   | 4.873258338    | 4.193658977                |             | 1638   |
| 7.526519194            | 6.207438439                                   | 6.300538632    |                            |             |        |
| ENSG00000137310        | 2650.599199                                   | 2547.261735    | 2990.107557                |             |        |
| 1879.565853            | 1912.708723                                   | 2180.260884    | 2729.32283                 |             |        |
| 1990.845154            | 0.455207355                                   | 0.001060563    | 0.011196701                |             | TCF19  |
| 6                      | 31158542                                      | 31167159       | +                          | 3538        |        |
| protein_coding         | transcription factor 19 [Source:HGNC          |                |                            |             |        |
| Symbol;Acc:HGNC:11629] | Others                                        | 2291           | 2748                       | 3058        | 1871   |
| 2222                   | 35.41293916                                   | 34.24465993    | 40.03889731                |             | 2093   |
| 25.56920207            | 25.77923334                                   | 29.31785968    |                            |             |        |
| ENSG00000196502        | 10.41265508                                   | 14.83121825    | 11.73358099                |             | 0      |
| 0                      | 0                                             | 12.32581811    | 0                          | 6.11747485  |        |
| 0.001062433            | 1                                             | SULT1A1 16     | 28605196                   | 28623625    |        |
| -                      | 8909                                          | protein_coding | sulfotransferase family 1A |             |        |
| member 1 [Source:HGNC  | Symbol;Acc:HGNC:11453]                        | -              | 9                          | 16          |        |
| 12                     | 0                                             | 0              | 0.055246944                | 0.079181729 |        |
| 0.062395712            | 0                                             | 0              | 0                          |             |        |
| ENSG00000096063        | 3536.831843                                   | 2935.654263    | 3500.51833                 |             |        |
| 2434.093032            | 2567.032396                                   | 2334.311721    | 3324.334812                |             |        |
| 2445.145716            | 0.442902303                                   | 0.001063687    | 0.011221939                |             | SRPK1  |
| 6                      | 35832966                                      | 35921342       | -                          | 6692        |        |
| protein_coding         | SRSF protein kinase 1 [Source:HGNC            |                |                            |             |        |
| Symbol;Acc:HGNC:11305] | -                                             | 3057           | 3167                       | 3580        | 2423   |
| 2379                   | 24.98240354                                   | 20.86536994    | 24.78161184                |             | 2809   |
| 17.50647461            | 18.2917141                                    | 16.59527852    |                            |             |        |
| ENSG00000176046        | 947.5516124                                   | 1152.200268    | 860.4626062                |             |        |
| 1226.590009            | 1585.546887                                   | 1602.324943    | 986.7381622                |             |        |
| 1471.48728             | -0.576331778                                  | 0.001066907    | 0.011248146                |             | NUPR1  |
| 16                     | 28532708                                      | 28539174       | -                          | 5674        |        |
| protein_coding         | "nuclear protein 1, transcriptional regulator |                |                            |             |        |
| [Source:HGNC           | Symbol;Acc:HGNC:29990]"                       | -              | 819                        | 1243        | 880    |
| 1221                   | 1735                                          | 1633           | 7.893857515                | 9.658635017 |        |

|                        |                                                  |             |                  |        |
|------------------------|--------------------------------------------------|-------------|------------------|--------|
| 7.184487549            | 10.40465176                                      | 13.32504687 | 13.43516143      |        |
| ENSG00000112658        | 1485.538792                                      | 2523.161005 | 2413.206491      |        |
| 3184.512964            | 3023.962334                                      | 3563.774767 | 2140.635429      |        |
| 3257.416688            | -0.605084552                                     | 0.001073767 | 0.011312669      | SRF    |
| 6                      | 43171299                                         | 43181507    | + 4202           |        |
| protein_coding         | serum response factor [Source:HGNC               |             |                  |        |
| Symbol;Acc:HGNC:11291] | SRF                                              | 1284 2722   | 2468 3170        | 3309   |
| 3632                   | 16.71104807                                      | 28.56051477 | 27.20768326      |        |
| 36.47576681            | 34.31621                                         | 40.34928354 |                  |        |
| ENSG00000165891        | 3453.530602                                      | 2888.379755 | 2582.365617      |        |
| 4625.078134            | 4058.451716                                      | 3808.097431 | 2974.758658      |        |
| 4163.87576             | -0.485430137                                     | 0.001077217 | 0.011338396      | E2F7   |
| 12                     | 77021247                                         | 77065580    | - 6303           |        |
| protein_coding         | E2F transcription factor 7 [Source:HGNC          |             |                  |        |
| Symbol;Acc:HGNC:23820] | E2F                                              | 2985 3116   | 2641 4604        | 4441   |
| 3881                   | 25.89952154                                      | 21.7963664  | 19.40991126      |        |
| 35.31744067            | 30.70379543                                      | 28.74368014 |                  |        |
| ENSG00000172469        | 575.0099528                                      | 454.206059  | 483.0324176      |        |
| 211.9660048            | 348.1806133                                      | 315.9513973 | 504.0828098      |        |
| 292.0326718            | 0.786075385                                      | 0.001077693 | 0.011338396      | MANEA  |
| 6                      | 95577543                                         | 95609457    | + 5187           |        |
| protein_coding         | mannosidase endo-alpha [Source:HGNC              |             |                  |        |
| Symbol;Acc:HGNC:21072] | -                                                | 497 490     | 494 211          | 381    |
| 322                    | 5.240043032                                      | 4.164988341 | 4.411772982      |        |
| 1.966832717            | 3.200864762                                      | 2.897915111 |                  |        |
| ENSG00000174332        | 45.12150535                                      | 45.4206059  | 51.82331606      |        |
| 13.05951689            | 5.483159264                                      | 11.77458623 | 47.45514244      |        |
| 10.10575413            | 2.236440457                                      | 0.001078667 | 0.011340842      | GLIS1  |
| 1                      | 53506237                                         | 53738106    | - 3113           |        |
| protein_coding         | GLIS family zinc finger 1 [Source:HGNC           |             |                  |        |
| Symbol;Acc:HGNC:29525] | zf-C2H2                                          | 39 49       | 53 13            | 6      |
| 12                     | 0.685141382                                      | 0.693986332 | 0.788677053      |        |
| 0.201913542            | 0.083990608                                      | 0.179948471 |                  |        |
| ENSG00000172985        | 283.4556106                                      | 359.6570426 | 710.8594485      |        |
| 268.2223853            | 155.3561792                                      | 220.7734919 | 451.3240339      |        |
| 214.7840188            | 1.072753186                                      | 0.00108098  | 0.011355246      | SH3RF3 |
| 2                      | 109129348                                        | 109504632   | + 5803           |        |
| protein_coding         | SH3 domain containing ring finger 3 [Source:HGNC |             |                  |        |
| Symbol;Acc:HGNC:24699] | -                                                | 245 388     | 727 267          | 170    |
| 225                    | 2.308916496                                      | 2.947902484 | 5.803423929      |        |
| 2.224640848            | 1.276600319                                      | 1.8099892   |                  |        |
| ENSG00000072840        | 894.3313753                                      | 1004.815037 | 996.3765861      |        |
| 1391.340838            | 1301.336465                                      | 1357.021063 | 965.1743327      |        |
| 1349.899455            | -0.483444573                                     | 0.001081523 | 0.011355246      | EVC    |
| 4                      | 5711197 5814305                                  | + 7148      | protein_coding   | EvC    |
| ciliary complex        | subunit 1 [Source:HGNC Symbol;Acc:HGNC:3497]     |             |                  |        |
| 773                    | 1084 1019                                        | 1385 1424   | 1383 5.914113607 | -      |
| 6.686189733            | 6.603772387                                      | 9.368422017 | 8.681285584      |        |
| 9.031994659            |                                                  |             |                  |        |
| ENSG00000204209        | 2721.173861                                      | 3007.029501 | 2922.639466      |        |

|                        |                                                        |                        |                            |       |
|------------------------|--------------------------------------------------------|------------------------|----------------------------|-------|
| 3771.186645            | 3904.923256                                            | 3739.412345            | 2883.614276                |       |
| 3805.174082            | -0.399919271                                           | 0.001084683            | 0.011380612                | DAXX  |
| 6                      | 33318558                                               | 33323016               | - 3084                     |       |
| protein_coding         | death domain associated protein                        | [Source:HGNC           |                            |       |
| Symbol;Acc:HGNC:2681]  | -                                                      | 2352 3244              | 2989 3754                  | 4273  |
| 3811                   | 41.70783634                                            | 46.37676317            | 44.89665667                |       |
| 58.85469527            | 60.3777773                                             | 57.68602518            |                            |       |
| ENSG00000080546        | 226.7644884                                            | 159.4355962            | 169.159126                 |       |
| 84.38457065            | 69.45335068                                            | 104.9900606            | 185.1197369                |       |
| 86.27599397            | 1.100709403                                            | 0.001087234            | 0.011398975                | SESN1 |
| 6                      | 108986437                                              | 109094819              | - 5121                     |       |
| protein_coding         | sestrin 1 [Source:HGNC                                 | Symbol;Acc:HGNC:21595] | -                          |       |
| 196                    | 172 173                                                | 84 76                  | 107 2.093129065            |       |
| 1.480838268            | 1.564925917                                            | 0.79309594             | 0.646721671                |       |
| 0.975382676            |                                                        |                        |                            |       |
| ENSG00000089820        | 55.53416043                                            | 143.6774268            | 77.24607488                |       |
| 247.1262426            | 285.1242818                                            | 145.2198969            | 92.15255405                |       |
| 225.8234738            | -1.28893761                                            | 0.001087925            | 0.011398975                |       |
| ARHGAP4 X              | 153907367                                              | 153934999              | - 5580                     |       |
| protein_coding         | Rho GTPase activating protein 4                        | [Source:HGNC           |                            |       |
| Symbol;Acc:HGNC:674]   | -                                                      | 48 155                 | 79 246                     | 312   |
| 148                    | 0.470437303                                            | 1.224704905            | 0.655836145                |       |
| 2.131582395            | 2.436570562                                            | 1.238150828            |                            |       |
| ENSG00000161036        | 887.3896053                                            | 1330.174887            | 1201.714253                |       |
| 1597.279373            | 1718.970429                                            | 1736.751469            | 1139.759582                |       |
| 1684.333757            | -0.562542882                                           | 0.001089656            | 0.011409297                | LRWD1 |
| 7                      | 102464929                                              | 102473168              | + 5926                     |       |
| protein_coding         | leucine rich repeats and WD repeat domain containing 1 | [Source:HGNC           |                            |       |
| Symbol;Acc:HGNC:21769] | -                                                      | 767 1435               | 1229                       |       |
| 1590                   | 1881 1770                                              | 7.078291266            | 10.67638464                |       |
| 9.607108412            | 12.97288875                                            | 13.83202439            | 13.94304584                |       |
| ENSG00000169403        | 16.19746346                                            | 18.53902282            | 3.911193665                | 0     |
| 0                      | 0 12.88255998                                          | 0                      | 6.179717165                |       |
| 0.001089954            | 1                                                      | PTAFR 1                | 28147166 28193936          |       |
| -                      | 4706                                                   | protein_coding         | platelet activating factor |       |
| receptor [Source:HGNC  | Symbol;Acc:HGNC:9582]                                  | -                      | 14 20                      |       |
| 4                      | 0 0                                                    | 0                      | 0.162693734 0.187375166    |       |
| 0.03937409             | 0                                                      | 0                      | 0                          |       |
| ENSG00000139921        | 2698.034628                                            | 2444.370158            | 2202.002033                |       |
| 1438.556014            | 1973.023475                                            | 1718.108375            | 2448.135606                |       |
| 1709.895955            | 0.517357046                                            | 0.001094125            | 0.011441707                | TMX1  |
| 14                     | 51240162                                               | 51257546               | + 4499                     |       |
| protein_coding         | thioredoxin related transmembrane protein 1            | [Source:HGNC           |                            |       |
| Symbol;Acc:HGNC:15487] | -                                                      | 2332 2637              | 2252                       |       |
| 1432                   | 2159 1751                                              | 28.34701057            | 25.84211737                |       |
| 23.18754922            | 15.38963222                                            | 20.91198443            | 18.16837933                |       |
| ENSG00000206527        | 2768.60929                                             | 2505.548934            | 2681.123257                |       |
| 1691.709726            | 2087.25596                                             | 2008.548168            | 2651.760494                |       |
| 1929.171285            | 0.458685691                                            | 0.001094248            | 0.011441707                | HACD2 |
| 3                      | 123490820                                              | 123585185              | - 5351                     |       |

|                                                    |                                                      |              |             |                |                  |                       |
|----------------------------------------------------|------------------------------------------------------|--------------|-------------|----------------|------------------|-----------------------|
| protein_coding                                     | 3-hydroxyacyl-CoA dehydratase 2 [Source:HGNC         |              |             |                |                  |                       |
| Symbol;Acc:HGNC:9640]                              | -                                                    | 2393         | 2703        | 2742           | 1684             | 2284                  |
|                                                    | 2047                                                 | 24.45695928  | 22.27127357 | 23.73749877    |                  |                       |
| 15.21627514                                        |                                                      | 18.60029132  | 17.85784    |                |                  |                       |
| ENSG00000147408                                    |                                                      | 84.45820233  | 115.8688926 | 194.5818848    |                  |                       |
| 14.06409511                                        |                                                      | 42.03755436  | 63.77900877 | 131.6363266    |                  |                       |
| 39.96021941                                        |                                                      | 1.71994896   | 0.001095478 | 0.011446735    |                  |                       |
| CSGALNACT1                                         | 8                                                    | 19404161     | 19758029    | -              |                  | 6580                  |
| protein_coding                                     | chondroitin sulfate N-                               |              |             |                |                  |                       |
| acetylgalactosaminyltransferase 1 [Source:HGNC     | Symbol;Acc:HGNC:24290]                               |              |             |                |                  |                       |
|                                                    | -                                                    | 73           | 125         | 199            | 14               | 46                    |
|                                                    |                                                      |              |             |                |                  | 65                    |
| 0.606724705                                        |                                                      | 0.837564145  | 1.400972591 | 0.102873463    |                  |                       |
| 0.304642532                                        |                                                      | 0.461140747  |             |                |                  |                       |
| ENSG00000135842                                    |                                                      | 1899.731072  | 1727.836927 | 1419.7633      |                  |                       |
| 2587.7935                                          |                                                      | 2217.937922  | 2334.311721 | 1682.443766    |                  |                       |
| 2380.014381                                        |                                                      | -0.500695979 | 0.001102347 | 0.011510636    |                  |                       |
| FAM129A 1                                          |                                                      | 184790724    | 184974550   | -              |                  | 8372                  |
| protein_coding                                     | family with sequence similarity 129 member A         |              |             |                |                  |                       |
| [Source:HGNC                                       | Symbol;Acc:HGNC:16784]                               |              |             |                |                  |                       |
|                                                    | -                                                    |              |             | 1642           | 1864             | 1452                  |
|                                                    | 2576                                                 | 2427         | 2379        | 10.72602107    | 9.816363825      |                       |
| 8.034148458                                        |                                                      | 14.87708538  | 12.63278644 | 13.26512229    |                  |                       |
| ENSG00000115266                                    |                                                      | 404.9365865  | 573.7827562 | 882.9519698    |                  |                       |
| 1100.013153                                        |                                                      | 859.9421446  | 1333.471891 | 620.5571042    |                  |                       |
| 1097.809063                                        |                                                      | -0.821873009 | 0.001104345 | 0.011523633    |                  | APC2                  |
| 19                                                 |                                                      | 1446302      | 1473244     | +              | 12610            | protein_coding "APC2, |
| WNT signaling pathway regulator [Source:HGNC       | Symbol;Acc:HGNC:24036]"                              |              |             |                |                  |                       |
|                                                    | -                                                    | 350          | 619         | 903            | 1095             | 941                   |
|                                                    |                                                      |              |             |                |                  | 1359                  |
| 1.517915761                                        |                                                      | 2.164260436  | 3.31722645  | 4.19855889     |                  |                       |
| 3.251869694                                        |                                                      | 5.03095469   |             |                |                  |                       |
| ENSG00000253284                                    |                                                      | 13.88354011  | 12.05036483 | 10.75578258    |                  | 0                     |
|                                                    | 0                                                    | 0            | 12.22989584 | 0              | 6.104626452      |                       |
| 0.001106924                                        |                                                      | 1            | AC092828.1  | 12             | 19147074         |                       |
| 19154659                                           |                                                      | +            | 5391        | sense_intronic | novel transcript |                       |
|                                                    | -                                                    | 12           | 13          | 11             | 0                | 0                     |
| 0.121732524                                        |                                                      | 0.106318289  | 0.094520456 | 0              | 0                | 0                     |
| ENSG00000210140                                    |                                                      | 342.460656   | 930.6589454 | 615.0352038    |                  |                       |
| 1766.048514                                        |                                                      | 1254.729612  | 1990.886289 | 629.3849351    |                  |                       |
| 1670.554805                                        |                                                      | -1.407674378 | 0.001111988 | 0.01159547     |                  | MT-TC                 |
| MT                                                 |                                                      | 5761         | 5826        | -              | 66               | Mt_tRNA               |
| mitochondrially encoded tRNA cysteine [Source:HGNC | Symbol;Acc:HGNC:7477]                                |              |             |                |                  |                       |
|                                                    | -                                                    |              | 296         | 1004           | 629              | 1758                  |
|                                                    | 2029                                                 | 245.2689028  | 670.6929407 | 441.4781009    |                  | 1373                  |
| 1287.882232                                        |                                                      | 906.5363009  | 1435.106552 |                |                  |                       |
| ENSG00000114383                                    |                                                      | 674.5086569  | 888.0191929 | 904.4635349    |                  |                       |
| 1278.828077                                        |                                                      | 1167.912923  | 1181.383485 | 822.3304616    |                  |                       |
| 1209.374828                                        |                                                      | -0.555403497 | 0.001117806 | 0.011648189    |                  | TUSC2                 |
| 3                                                  |                                                      | 50320027     | 50328251    | -              | 2406             |                       |
| protein_coding                                     | "tumor suppressor 2, mitochondrial calcium regulator |              |             |                |                  |                       |
| [Source:HGNC                                       | Symbol;Acc:HGNC:17034]"                              |              |             |                |                  |                       |
|                                                    | -                                                    |              |             | 583            | 958              | 925                   |
|                                                    | 1273                                                 | 1278         | 1204        | 13.25157944    | 17.55512168      |                       |

|                                                                       |                                                        |             |                |        |
|-----------------------------------------------------------------------|--------------------------------------------------------|-------------|----------------|--------|
| 17.80937036                                                           | 25.5819707                                             | 23.14695293 | 23.36021845    |        |
| ENSG00000163539                                                       | 2199.384146                                            | 1729.690829 | 1838.261022    |        |
| 1478.739143                                                           | 1334.235421                                            | 1263.805589 | 1922.445332    |        |
| 1358.926718                                                           | 0.500085445                                            | 0.001119434 | 0.011653632    | CLASP2 |
| 3                                                                     | 33496245                                               | 33718356    | - 15211        |        |
| protein_coding                                                        | cytoplasmic linker associated protein 2 [Source:HGNC   |             |                |        |
| Symbol;Acc:HGNC:17078]                                                | -                                                      | 1901 1866   | 1880 1472      | 1460   |
| 1288                                                                  | 6.834693811                                            | 5.408636953 | 5.725356562    |        |
| 4.678980768                                                           | 4.182670826                                            | 3.952793553 |                |        |
| ENSG00000198886                                                       | 54772.87965                                            | 50680.12667 | 61949.39645    |        |
| 71006.60247                                                           | 70533.53306                                            | 79598.16537 | 55800.80093    |        |
| 73712.76697                                                           | -0.401628654                                           | 0.001119852 | 0.011653632    | MT-ND4 |
| MT                                                                    | 10760 12137                                            | + 1378      | protein_coding |        |
| mitochondrially encoded NADH:ubiquinone oxidoreductase core subunit 4 |                                                        |             |                |        |
| [Source:HGNC Symbol;Acc:HGNC:7459]                                    | -                                                      |             | 47342 54674    | 63356  |
| 70683                                                                 | 77182 81122                                            | 1878.849944 | 1749.305207    |        |
| 2129.810621                                                           | 2480.087326                                            | 2440.76186  | 2748.118575    |        |
| ENSG00000158301                                                       | 591.2074163                                            | 675.7473817 | 496.7215954    |        |
| 842.8411283                                                           | 882.7886416                                            | 926.2674504 | 587.8921311    |        |
| 883.9657401                                                           | -0.588233865                                           | 0.001135276 | 0.011806103    |        |
| GPRASP2 X                                                             | 102712176                                              | 102717733   | + 3975         |        |
| protein_coding                                                        | G protein-coupled receptor associated sorting protein  |             |                |        |
| 2 [Source:HGNC Symbol;Acc:HGNC:25169]                                 | -                                                      |             | 511 729        | 508    |
| 839                                                                   | 966 944                                                | 7.030374822 | 8.08582529     |        |
| 5.920099896                                                           | 10.20530631                                            | 10.59006416 | 11.08615374    |        |
| ENSG00000121931                                                       | 541.4580642                                            | 360.5839938 | 455.6540619    |        |
| 592.701151                                                            | 843.4926669                                            | 777.1226914 | 452.5653733    |        |
| 737.7721698                                                           | -0.706728595                                           | 0.00113619  | 0.011807574    | LRIF1  |
| 1                                                                     | 110947185                                              | 110964079   | - 3621         |        |
| protein_coding                                                        | ligand dependent nuclear receptor interacting factor 1 |             |                |        |
| [Source:HGNC Symbol;Acc:HGNC:30299]                                   | -                                                      |             | 468 389        | 466    |
| 590                                                                   | 923 792                                                | 7.068252265 | 4.736472656    |        |
| 5.961559017                                                           | 7.878158304                                            | 11.10789521 | 10.2103985     |        |
| ENSG00000177426                                                       | 701.1187755                                            | 774.0042026 | 625.7909863    |        |
| 1058.825446                                                           | 1191.67328                                             | 892.9061227 | 700.3046548    |        |
| 1047.801616                                                           | -0.581340031                                           | 0.001142745 | 0.011867625    | TGIF1  |
| 18                                                                    | 3411608 3459978                                        | + 8222      | protein_coding | TGFB   |
| induced factor homeobox 1 [Source:HGNC Symbol;Acc:HGNC:11776]         |                                                        |             |                |        |
| Homeobox                                                              | 606 835                                                | 640 1054    | 1304 910       |        |
| 4.030787142                                                           | 4.477575948                                            | 3.605827589 | 6.198182435    |        |
| 6.911283638                                                           | 5.166660864                                            |             |                |        |
| ENSG00000196230                                                       | 42812.20985                                            | 39378.73837 | 47123.03907    |        |
| 33665.42538                                                           | 33476.51503                                            | 32287.87788 | 43104.66243    |        |
| 33143.27276                                                           | 0.379123664                                            | 0.001144552 | 0.011878325    | TUBB   |
| 6                                                                     | 30720201                                               | 30725426    | + 3359         |        |
| protein_coding                                                        | tubulin beta class I [Source:HGNC                      |             |                |        |
| Symbol;Acc:HGNC:20778]                                                | -                                                      | 37004 42482 | 48193 33512    | 36632  |
| 32906                                                                 | 602.4671632                                            | 557.607888  | 664.6246028    |        |
| 482.3825178                                                           | 475.2358825                                            | 457.3104498 |                |        |
| ENSG00000109079                                                       | 1720.402012                                            | 1713.932659 | 1659.323912    |        |

|                                     |                                                      |             |             |                     |
|-------------------------------------|------------------------------------------------------|-------------|-------------|---------------------|
| 2331.626053                         | 2111.016317                                          | 2460.888523 | 1697.886194 |                     |
| 2301.176964                         | -0.438578256                                         | 0.001148989 | 0.011916277 |                     |
| TNFAIP1 17                          | 28335602                                             | 28347009    | +           | 3889                |
| protein_coding                      | TNF alpha induced protein 1 [Source:HGNC             |             |             |                     |
| Symbol;Acc:HGNC:11894]              | -                                                    | 1487 1849   | 1697 2321   | 2310                |
| 2508                                | 20.91065988                                          | 20.9620101  | 20.21372509 |                     |
| 28.85615179                         | 25.8840741                                           | 30.10479158 |             |                     |
| ENSG00000179813                     | 226.7644884                                          | 284.5740002 | 118.3136084 |                     |
| 468.1334515                         | 425.8587029                                          | 348.3315094 | 209.8840323 |                     |
| 414.1078879                         | -0.980258727                                         | 0.001162779 | 0.01205112  |                     |
| FAM216B 13                          | 42781550                                             | 42791549    | +           | 3308                |
| protein_coding                      | family with sequence similarity 216 member B         |             |             |                     |
| [Source:HGNC Symbol;Acc:HGNC:26883] | -                                                    | 196 307     |             | 121                 |
| 466                                 | 466 355                                              | 3.240300466 | 4.091728721 |                     |
| 1.694424901                         | 6.811168625                                          | 6.138736804 | 5.009667339 |                     |
| ENSG00000168398                     | 35.86581195                                          | 91.76816294 | 138.8473751 |                     |
| 14.06409511                         | 18.27719755                                          | 36.30497422 | 88.82711666 |                     |
| 22.88208896                         | 1.959497553                                          | 0.001166545 | 0.012081959 | BDKRB2              |
| 14                                  | 96204679                                             | 96244166    | +           | 6845                |
| protein_coding                      | bradykinin receptor B2 [Source:HGNC                  |             |             |                     |
| Symbol;Acc:HGNC:1030]               | -                                                    | 31 99       | 142 14      | 20                  |
| 37                                  | 0.247675446                                          | 0.637669581 | 0.960986635 |                     |
| 0.098890779                         | 0.127325427                                          | 0.252333149 |             |                     |
| ENSG00000162086                     | 32.39492692                                          | 36.15109449 | 25.42275882 |                     |
| 121.5539649                         | 92.29984762                                          | 63.77900877 | 31.32292674 |                     |
| 92.54427375                         | -1.562503194                                         | 0.001168074 | 0.012089605 | ZNF75A              |
| 16                                  | 3305406 3318852                                      | +           | 8063        | protein_coding zinc |
| finger protein 75a [Source:HGNC     | Symbol;Acc:HGNC:13146]                               |             |             | zf-C2H2 28          |
| 39                                  | 26 121                                               | 101 65      | 0.189913608 |                     |
| 0.213256317                         | 0.149375422                                          | 0.725587725 | 0.545862565 |                     |
| 0.376324707                         |                                                      |             |             |                     |
| ENSG00000171853                     | 601.6200714                                          | 663.6970168 | 657.0805357 |                     |
| 973.4362971                         | 901.979699                                           | 896.8309848 | 640.799208  |                     |
| 924.082327                          | -0.527576427                                         | 0.001172712 | 0.012129394 |                     |
| TRAPPC12                            | 2 3379675                                            | 3485094 +   | 9193        | protein_coding      |
|                                     | trafficking protein particle complex 12 [Source:HGNC |             |             |                     |
| Symbol;Acc:HGNC:24284]              | -                                                    | 520 716     | 672 969     | 987                 |
| 914                                 | 3.093433585                                          | 3.433916418 | 3.386214529 |                     |
| 5.096449596                         | 4.678627727                                          | 4.641250098 |             |                     |
| ENSG00000272870                     | 135.3645161                                          | 60.25182416 | 55.73450972 |                     |
| 15.06867333                         | 30.15737595                                          | 25.51160351 | 83.78361664 |                     |
| 23.5792176                          | 1.823504415                                          | 0.001174071 | 0.012131945 |                     |
| AC097534.2                          | 4 173363780                                          | 173370446   | -           | 2495                |
|                                     | antisense uncharacterized LOC105377540 [Source:NCBI  |             |             |                     |
| gene;Acc:105377540]                 | -                                                    | 117 65      | 57 15       | 33                  |
| 26                                  | 2.564543231                                          | 1.148621033 | 1.058295042 |                     |
| 0.290684534                         | 0.576370823                                          | 0.486461902 |             |                     |
| ENSG00000175414                     | 1173.159139                                          | 1057.651252 | 1161.624518 |                     |
| 1496.821551                         | 1538.940034                                          | 1652.366935 | 1130.811636 |                     |
| 1562.709506                         | -0.466972199                                         | 0.001174546 | 0.012131945 | ARL10               |



|                        |                                                       |             |      |             |                 |
|------------------------|-------------------------------------------------------|-------------|------|-------------|-----------------|
| 5                      | 176365468                                             | 176401865   | +    | 11459       |                 |
| protein_coding         | ADP ribosylation factor like GTPase 10 [Source:HGNC   |             |      |             |                 |
| Symbol;Acc:HGNC:22042] | -                                                     | 1014        | 1141 | 1188        | 1490 1684       |
| 1684                   | 4.839337913                                           | 4.390084534 |      | 4.802553118 |                 |
| 6.286960988            | 6.404038962                                           | 6.86027308  |      |             |                 |
| ENSG00000168542        | 148.0910945                                           | 60.25182416 |      | 195.5596832 |                 |
| 64.29300621            | 7.310879019                                           | 30.4176811  |      | 134.6342006 |                 |
| 34.00718878            | 1.988220911                                           | 0.001184775 |      | 0.012229347 | COL3A1          |
| 2                      | 188974320                                             | 189012746   | +    | 6811        |                 |
| protein_coding         | collagen type III alpha 1 chain [Source:HGNC          |             |      |             |                 |
| Symbol;Acc:HGNC:2201]  | -                                                     | 128         | 65   | 200         | 64 8            |
| 31                     | 1.027764948                                           | 0.420761926 |      | 1.360258885 |                 |
| 0.454328844            | 0.05118441                                            | 0.212469624 |      |             |                 |
| ENSG00000171552        | 407.2505099                                           | 585.833121  |      | 605.2572196 |                 |
| 933.2531683            | 763.9868575                                           | 819.3149588 |      | 532.7802835 |                 |
| 838.8516615            | -0.653272269                                          | 0.001186302 |      | 0.01223684  | BCL2L1          |
| 20                     | 31664452                                              | 31723989    | -    | 3314        |                 |
| protein_coding         | BCL2 like 1 [Source:HGNC Symbol;Acc:HGNC:992]         |             |      |             |                 |
| 352                    | 632                                                   | 619         | 929  | 836         | 835 5.808779247 |
| 8.408112854            | 8.652479933                                           | 13.55390466 |      | 10.99290237 |                 |
| 11.76196837            |                                                       |             |      |             |                 |
| ENSG00000114450        | 2552.257457                                           | 1919.715813 |      | 1974.175002 |                 |
| 1358.189756            | 1538.026174                                           | 1608.212236 |      | 2148.716091 |                 |
| 1501.476055            | 0.516546441                                           | 0.001188986 |      | 0.012241425 | GNB4            |
| 3                      | 179396089                                             | 179451590   | -    | 7035        |                 |
| protein_coding         | G protein subunit beta 4 [Source:HGNC                 |             |      |             |                 |
| Symbol;Acc:HGNC:20731] | -                                                     | 2206        | 2071 | 2019        | 1352 1683       |
| 1639                   | 17.14889412                                           | 12.97926068 |      | 13.29458157 |                 |
| 9.292098532            | 10.42506117                                           | 10.87579186 |      |             |                 |
| ENSG0000007047         | 742.7693958                                           | 961.2483331 |      | 741.1711995 |                 |
| 1031.701834            | 1172.482223                                           | 1636.667486 |      | 815.0629761 |                 |
| 1280.283848            | -0.650962522                                          | 0.001189091 |      | 0.012241425 | MARK4           |
| 19                     | 45079288                                              | 45305283    | +    | 6668        |                 |
| protein_coding         | microtubule affinity regulating kinase 4 [Source:HGNC |             |      |             |                 |
| Symbol;Acc:HGNC:13538] | -                                                     | 642         | 1037 | 758         | 1027 1283       |
| 1668                   | 5.265433712                                           | 6.856731181 |      | 5.265941986 |                 |
| 7.446909378            | 8.384741211                                           | 11.67740898 |      |             |                 |
| ENSG00000134056        | 349.4024261                                           | 361.5109449 |      | 377.4301886 |                 |
| 220.0026306            | 209.2739119                                           | 228.623216  |      | 362.7811865 |                 |
| 219.2999195            | 0.72662056                                            | 0.001189149 |      | 0.012241425 | MRPS36          |
| 5                      | 69217760                                              | 69230129    | +    | 1530        |                 |
| protein_coding         | mitochondrial ribosomal protein S36 [Source:HGNC      |             |      |             |                 |
| Symbol;Acc:HGNC:16631] | -                                                     | 302         | 390  | 386         | 219 229         |
| 233                    | 10.79469124                                           | 11.23846854 |      | 11.68687314 |                 |
| 6.920761778            | 6.522328212                                           | 7.109032932 |      |             |                 |
| ENSG00000143786        | 1848.824758                                           | 1845.559721 |      | 1626.078766 |                 |
| 2501.399773            | 2527.736421                                           | 2222.453152 |      | 1773.487748 |                 |
| 2417.196448            | -0.446886792                                          | 0.001195628 |      | 0.012293068 | CNIH3           |
| 1                      | 224434660                                             | 224740549   | +    | 6386        |                 |
| protein_coding         | cornichon family AMPA receptor auxiliary protein 3    |             |      |             |                 |

|                                                         |                                                        |             |             |             |
|---------------------------------------------------------|--------------------------------------------------------|-------------|-------------|-------------|
| [Source:HGNC Symbol;Acc:HGNC:26802]                     | -                                                      | 1598        | 1991        | 1663        |
| 2490                                                    | 2766                                                   | 2265        | 13.68492979 | 13.74599887 |
| 12.06329062                                             | 18.8526172                                             | 18.87477831 | 16.55714027 |             |
| ENSG00000145451                                         | 2.313923351                                            | 6.488657986 | 2.933395248 |             |
| 55.25180221                                             | 29.24351608                                            | 14.71823279 | 3.911992195 |             |
| 33.07118369                                             | -3.062076171                                           | 0.001195774 | 0.012293068 | GLRA3       |
| 4                                                       | 174636914                                              | 174829314   | -           | 9599        |
| protein_coding                                          | glycine receptor alpha 3 [Source:HGNC                  |             |             |             |
| Symbol;Acc:HGNC:4328]                                   | -                                                      | 2           | 7           | 3           |
| 15                                                      | 0.01139459                                             | 0.032151853 | 0.014477638 | 55          |
| 0.277037088                                             | 0.145272224                                            | 0.07294765  |             | 32          |
| ENSG00000197321                                         | 1615.118499                                            | 1163.323682 | 1829.460837 |             |
| 1091.976527                                             | 678.9978889                                            | 1078.355856 | 1535.967673 |             |
| 949.7767574                                             | 0.693627947                                            | 0.001197866 | 0.0123063   | SVIL        |
| 10                                                      | 29457338                                               | 29736781    | -           | 9937        |
| protein_coding                                          | supervillin [Source:HGNC Symbol;Acc:HGNC:11480]        | -           |             |             |
| 1396                                                    | 1255                                                   | 1871        | 1087        | 743         |
| 5.568297032                                             | 8.722097828                                            | 5.289023184 | 3.258307902 |             |
| 5.162837293                                             |                                                        |             |             |             |
| ENSG00000139350                                         | 1189.356603                                            | 998.3263787 | 950.4200605 |             |
| 683.113191                                              | 761.2452779                                            | 708.4376051 | 1046.034347 |             |
| 717.5986913                                             | 0.54289613                                             | 0.001204019 | 0.012361205 | NEDD1       |
| 12                                                      | 96907223                                               | 96953777    | +           | 4463        |
| protein_coding                                          | "neural precursor cell expressed, developmentally      |             |             |             |
| down-regulated 1 [Source:HGNC Symbol;Acc:HGNC:7723]"    | -                                                      |             |             | 1028        |
| 1077                                                    | 972                                                    | 680         | 833         | 722         |
| 10.63953811                                             | 10.08885392                                            | 7.366874007 | 8.133485791 |             |
| 7.551902018                                             |                                                        |             |             |             |
| ENSG00000159147                                         | 1007.71362                                             | 1065.066861 | 1100.023218 |             |
| 776.5389656                                             | 776.7808958                                            | 641.7149497 | 1057.601233 |             |
| 731.6782704                                             | 0.531629764                                            | 0.001205737 | 0.01237054  | DONSON      |
| 21                                                      | 33559542                                               | 33588708    | -           | 3513        |
| protein_coding                                          | downstream neighbor of SON [Source:HGNC                |             |             |             |
| Symbol;Acc:HGNC:2993]                                   | -                                                      | 871         | 1149        | 1125        |
| 654                                                     | 13.55922033                                            | 14.42035118 | 14.83463375 | 773         |
| 10.63904291                                             | 10.54385376                                            | 8.690517418 |             | 850         |
| ENSG00000222032                                         | 236.0201818                                            | 184.463277  | 240.5384104 |             |
| 123.5631213                                             | 74.02265007                                            | 123.6331555 | 220.3406231 |             |
| 107.0729756                                             | 1.041938355                                            | 0.001207755 | 0.012375476 |             |
| AC112721.2                                              | 2                                                      | 237428920   | 237434822   | -           |
| lincRNA                                                 | novel protein (LOC728009)                              |             |             | 541         |
| 246                                                     | 123                                                    | 81          | 126         | 20.6218496  |
| 21.06397341                                             | 10.99281864                                            | 6.52448672  | 10.87224714 | 204         |
| ENSG00000070495                                         | 1204.397104                                            | 1412.673539 | 1208.558842 | 199         |
| 1686.686835                                             | 1921.847322                                            | 1721.052021 | 1275.209828 |             |
| 1776.528726                                             | -0.478075893                                           | 0.001207837 | 0.012375476 | JMJD6       |
| 17                                                      | 76712832                                               | 76726799    | -           | 5969        |
| protein_coding                                          | "jumonji domain containing 6, arginine demethylase and |             |             |             |
| lysine hydroxylase [Source:HGNC Symbol;Acc:HGNC:19355]" | -                                                      |             |             | 1041        |
| 1524                                                    | 1236                                                   | 1679        | 2103        | 1754        |
|                                                         |                                                        |             | 9.537704511 |             |

|                 |                                                                                           |             |                         |                |
|-----------------|-------------------------------------------------------------------------------------------|-------------|-------------------------|----------------|
| 11.25686211     | 9.592224789                                                                               | 13.60035779 | 15.35310753             |                |
| 13.71747085     |                                                                                           |             |                         |                |
| ENSG00000139329 | 251.0606836                                                                               | 240.0803455 | 154.4921498             |                |
| 81.37083598     | 137.9928415                                                                               | 66.72265532 | 215.2110596             |                |
| 95.36211093     | 1.171941349                                                                               | 0.001209183 | 0.012380965             | LUM            |
| 12              | 91102629                                                                                  | 91111831    | - 3008                  |                |
| protein_coding  | lumican [Source:HGNC Symbol;Acc:HGNC:6724]                                                |             |                         | -              |
| 217             | 259                                                                                       | 158         | 81 151 68               | 3.945268951    |
|                 | 3.796259486                                                                               | 2.433221867 | 1.301992263             | 2.187548614    |
|                 | 1.055302864                                                                               |             |                         |                |
| ENSG00000144134 | 90.24301071                                                                               | 139.9696223 | 92.89084954             |                |
| 242.1033515     | 248.5698867                                                                               | 174.6563625 | 107.7011608             |                |
| 221.7765335     | -1.039697883                                                                              | 0.001215333 | 0.012435607             | RABL2A         |
| 2               | 113627229                                                                                 | 113643396   | + 6008                  |                |
| protein_coding  | "RAB, member of RAS oncogene family like 2A [Source:HGNC Symbol;Acc:HGNC:9799]"           |             |                         | -              |
| 241             | 272                                                                                       | 178         | 0.710001705 1.10810517  | 78 151 95      |
| 0.732480617     | 1.93949353                                                                                | 1.972865952 | 1.383044373             |                |
| ENSG00000167549 | 86.77212568                                                                               | 125.138404  | 282.5837423             |                |
| 89.40746176     | 39.29597473                                                                               | 21.58674143 | 164.831424              |                |
| 50.09672597     | 1.720767676                                                                               | 0.001217686 | 0.012451351             | COR06          |
| 17              | 29614756                                                                                  | 29622907    | - 4321                  |                |
| protein_coding  | coronin 6 [Source:HGNC Symbol;Acc:HGNC:21356]                                             |             |                         | -              |
| 75              | 135                                                                                       | 289         | 89 43 22                | 0.949230556    |
|                 | 1.377474158                                                                               | 3.09824696  | 0.995879877             | 0.433653431    |
|                 | 0.237675519                                                                               |             |                         |                |
| ENSG00000172296 | 317.0074991                                                                               | 332.7754596 | 216.09345               |                |
| 659.0033136     | 488.0011745                                                                               | 394.4486388 | 288.6254696             |                |
| 513.817709      | -0.832190229                                                                              | 0.001221714 | 0.012484187             | SPTLC3         |
| 20              | 13008979                                                                                  | 13169103    | + 8520                  |                |
| protein_coding  | serine palmitoyltransferase long chain base subunit 3 [Source:HGNC Symbol;Acc:HGNC:16253] |             |                         | -              |
| 656             | 534                                                                                       | 402         | 1.758756359 1.857756595 | 274 359 221    |
| 1.201586761     | 3.722763619                                                                               | 2.731242489 | 2.202584071             |                |
| ENSG00000171302 | 2323.179045                                                                               | 2326.647364 | 3043.88647              |                |
| 3666.71051      | 3507.39421                                                                                | 3489.202387 | 2564.570959             |                |
| 3554.435702     | -0.470740882                                                                              | 0.001223037 | 0.012489357             | CANT1          |
| 17              | 78991717                                                                                  | 79009867    | - 4421                  |                |
| protein_coding  | calcium activated nucleotidase 1 [Source:HGNC Symbol;Acc:HGNC:19721]                      |             |                         | -              |
| 3556            | 24.83921727                                                                               | 25.03151667 | 3113 3650               | 3838           |
| 39.91844048     | 37.83058466                                                                               | 37.54804012 | 32.61828038             |                |
| ENSG00000140575 | 9071.736499                                                                               | 7171.820977 | 7856.610274             |                |
| 5848.654409     | 5994.920796                                                                               | 6211.094238 | 8033.38925              |                |
| 6018.223148     | 0.416525089                                                                               | 0.00122461  | 0.012497074             | IQGAP1         |
| 15              | 90388218                                                                                  | 90502243    | + 11535                 |                |
| protein_coding  | IQ motif containing GTPase activating protein 1 [Source:HGNC Symbol;Acc:HGNC:6110]        |             |                         | -              |
| 5822            | 6560                                                                                      | 6330        | 37.17479375 29.57256234 | 7841 7737 8035 |
| 32.26790265     | 24.40370794                                                                               | 24.78248422 | 25.61722879             |                |

|                        |                       |                 |                |                  |
|------------------------|-----------------------|-----------------|----------------|------------------|
| ENSG00000280300        | 19.66834849           | 7.415609127     | 9.777984162    | 0                |
| 0                      | 0                     | 12.28731393     | 0              | 6.108911906      |
| 0.001228025            | 1                     | AC117503.4      | 12             | 123754246        |
| 123754794              | -                     | 549             | TEC            | novel transcript |
| 17                     | 8                     | 10              | 0              | 0                |
| 0.642468147            | 0.843781718           | 0               | 0              | 1.693445755      |
| ENSG00000172965        | 1278.442652           | 1002.034183     | 1302.42749     |                  |
| 830.7861896            | 701.8443859           | 884.075183      | 1194.301442    |                  |
| 805.5685862            | 0.567958915           | 0.001235632     | 0.012601143    |                  |
| MIR4435-2HG            | 2                     | 111036776       | 111523376      | -                |
| lincRNA                | MIR4435-2             | host gene       | [Source:HGNC   |                  |
| Symbol;Acc:HGNC:35163] | -                     | 1105            | 1081           | 1332             |
| 901                    | 4.615137602           | 3.63988209      | 4.71231533     | 827              |
| 3.053756395            | 2.555921323           | 3.212169767     |                | 768              |
| ENSG00000198695        | 5445.818608           | 4949.919092     | 6077.017156    |                  |
| 6562.909524            | 7256.961287           | 9496.203797     | 5490.918285    |                  |
| 7772.024869            | -0.50125809           | 0.00124674      | 0.012705947    | MT-ND6           |
| MT                     | 14149                 | 14673           | -              | 525              |
| mitochondrially        | encoded               | NADH:ubiquinone | oxidoreductase | core subunit 6   |
| [Source:HGNC           | Symbol;Acc:HGNC:7462] | -               | 4707           | 5340             |
| 6533                   | 7941                  | 9678            | 490.3199992    | 448.4519446      |
| 548.3833817            | 601.6647545           | 659.1351777     | 860.5425521    |                  |
| ENSG00000159259        | 1151.176867           | 1413.60049      | 1364.028791    |                  |
| 818.7312509            | 977.8300688           | 938.0420366     | 1309.602049    |                  |
| 911.5344521            | 0.523058977           | 0.001248234     | 0.012710845    | CHAF1B           |
| 21                     | 36385378              | 36419015        | +              | 5118             |
| protein_coding         | chromatin assembly    | factor 1        | subunit B      | [Source:HGNC     |
| Symbol;Acc:HGNC:1911]  | -                     | 995             | 1525           | 1395             |
| 956                    | 10.63206228           | 13.13722143     | 12.62630808    | 815              |
| 7.699429446            | 9.110497512           | 8.719742228     |                | 1070             |
| ENSG00000100418        | 924.4123789           | 1147.565512     | 1036.466321    |                  |
| 1657.554066            | 1383.583854           | 1404.119408     | 1036.148071    |                  |
| 1481.752443            | -0.515326608          | 0.001248884     | 0.012710845    | DESI1            |
| 22                     | 41598028              | 41621096        | -              | 4972             |
| protein_coding         | desumoylating         | isopeptidase 1  | [Source:HGNC   |                  |
| Symbol;Acc:HGNC:24577] | -                     | 799             | 1238           | 1060             |
| 1431                   | 8.788411265           | 10.97800648     | 9.875911764    | 1650             |
| 16.04552904            | 13.26946316           | 13.43552216     |                | 1514             |
| ENSG00000171724        | 532.2023708           | 723.0218899     | 330.4958647    |                  |
| 685.1223474            | 970.5191898           | 1226.519399     | 528.5733751    |                  |
| 960.7203122            | -0.86177762           | 0.001259141     | 0.01280671     | VAT1L            |
| 16                     | 77788530              | 77980107        | +              | 4137             |
| protein_coding         | vesicle amine         | transport 1     | like           | [Source:HGNC     |
| Symbol;Acc:HGNC:29315] | -                     | 460             | 780            | 338              |
| 1250                   | 6.080888266           | 8.312717847     | 3.784718954    | 682              |
| 7.970766195            | 11.18658672           | 14.10491677     |                | 1062             |
| ENSG00000187091        | 30.08100357           | 61.1787753      | 50.84551764    |                  |
| 100.4578222            | 141.648281            | 125.5955865     | 47.36843217    |                  |
| 122.5672299            | -1.366149881          | 0.00126348      | 0.012842303    | PLCD1            |
| 3                      | 38007496              | 38029762        | -              | 4314             |

|                                                               |                                                    |             |             |             |                |
|---------------------------------------------------------------|----------------------------------------------------|-------------|-------------|-------------|----------------|
| protein_coding                                                | phospholipase C delta 1 [Source:HGNC               |             |             |             |                |
| Symbol;Acc:HGNC:9060]                                         | -                                                  | 26          | 66          | 52          | 100            |
| 128                                                           | 0.329600544                                        | 0.674524537 | 0.558374606 |             | 155            |
| 1.120781815                                                   | 1.565705781                                        | 1.38508321  |             |             |                |
| ENSG00000140612                                               | 2031.624703                                        | 1821.458992 | 1997.642164 |             |                |
| 1381.295055                                                   | 1443.898606                                        | 1484.579081 | 1950.241953 |             |                |
| 1436.590914                                                   | 0.440773848                                        | 0.001266584 | 0.012865291 |             | SEC11A         |
| 15                                                            | 84669538                                           | 84716716    | -           | 5748        |                |
| protein_coding                                                | "SEC11 homolog A, signal peptidase complex subunit |             |             |             |                |
| [Source:HGNC Symbol;Acc:HGNC:17718]"                          | -                                                  |             | 1756        | 1965        | 2043           |
| 1375                                                          | 1580                                               | 1513        | 16.70715358 | 15.07230776 |                |
| 16.46470914                                                   | 11.56610565                                        | 11.97840313 | 12.28763223 |             |                |
| ENSG00000176171                                               | 3086.773751                                        | 2824.420126 | 2023.064923 |             |                |
| 2979.579007                                                   | 4417.598647                                        | 4814.824554 | 2644.752933 |             |                |
| 4070.667403                                                   | -0.622363827                                       | 0.001272557 | 0.012915774 |             | BNIP3          |
| 10                                                            | 131966455                                          | 131982013   | -           | 5325        |                |
| protein_coding                                                | BCL2 interacting protein 3 [Source:HGNC            |             |             |             |                |
| Symbol;Acc:HGNC:1084]                                         | -                                                  | 2668        | 3047        | 2069        | 2966           |
| 4907                                                          | 27.40065382                                        | 25.22823107 | 17.99879101 |             | 4834           |
| 26.93101682                                                   | 39.55902979                                        | 43.01723398 |             |             |                |
| ENSG00000171943                                               | 791.3617862                                        | 569.1480005 | 775.394144  |             |                |
| 410.8724928                                                   | 523.6417098                                        | 404.260794  | 711.9679769 |             |                |
| 446.2583322                                                   | 0.672817531                                        | 0.001273243 | 0.012915774 |             |                |
| SRGAP2C 1                                                     | 121184810                                          | 121392822   | +           | 7311        |                |
| protein_coding                                                | SLIT-ROBO Rho GTPase activating protein 2C         |             |             |             |                |
| [Source:HGNC Symbol;Acc:HGNC:30584]                           | -                                                  |             | 684         | 614         | 793            |
| 409                                                           | 573                                                | 412         | 5.116512395 | 3.702759844 |                |
| 5.024569517                                                   | 2.704878367                                        | 3.415359592 | 2.63067058  |             |                |
| ENSG00000101463                                               | 122.6379376                                        | 109.3802346 | 128.0915925 |             |                |
| 41.1877071                                                    | 65.79791117                                        | 22.56795695 | 120.0365883 |             |                |
| 43.18452507                                                   | 1.472074958                                        | 0.001277782 | 0.01295322  |             |                |
| SYNDIG1 20                                                    | 24469199                                           | 24666616    | +           | 2847        |                |
| protein_coding                                                | synapse differentiation inducing 1 [Source:HGNC    |             |             |             |                |
| Symbol;Acc:HGNC:15885]                                        | -                                                  | 106         | 118         | 131         | 41             |
| 23                                                            | 2.03616567                                         | 1.827378446 | 2.131504649 |             | 72             |
| 0.696301941                                                   | 1.102055908                                        | 0.377125939 |             |             |                |
| ENSG00000129932                                               | 674.5086569                                        | 1047.454789 | 864.3737999 |             |                |
| 1233.622057                                                   | 1239.193994                                        | 1447.292891 | 862.1124153 |             |                |
| 1306.702981                                                   | -0.598847011                                       | 0.001280461 | 0.012970207 |             | DOHH           |
| 19                                                            | 3490822                                            | 3500940     | -           | 2031        | protein_coding |
| deoxyhypusine hydroxylase [Source:HGNC Symbol;Acc:HGNC:28662] |                                                    |             |             |             | -              |
| 583                                                           | 1130                                               | 884         | 1228        | 1356        | 1475           |
| 24.53027845                                                   | 20.16251936                                        | 29.2340954  | 29.09433023 |             |                |
| 33.90221961                                                   |                                                    |             |             |             |                |
| ENSG00000022567                                               | 337.8328093                                        | 282.720098  | 243.4718056 |             |                |
| 729.3237892                                                   | 442.3081807                                        | 390.5237767 | 288.0082376 |             |                |
| 520.7185822                                                   | -0.855060639                                       | 0.001281155 | 0.012970207 |             |                |
| SLC45A4 8                                                     | 141207166                                          | 141308305   | -           | 8608        |                |
| protein_coding                                                | solute carrier family 45 member 4 [Source:HGNC     |             |             |             |                |
| Symbol;Acc:HGNC:29196]                                        | -                                                  | 292         | 305         | 249         | 726            |
|                                                               |                                                    |             |             |             | 484            |

|                                     |                                                                                                            |             |             |                 |                        |
|-------------------------------------|------------------------------------------------------------------------------------------------------------|-------------|-------------|-----------------|------------------------|
|                                     | 398                                                                                                        | 1.855134089 | 1.562181675 | 1.33998379      |                        |
| 4.077890678                         |                                                                                                            | 2.450200934 | 2.158374739 |                 |                        |
| ENSG00000235033                     | 6.941770054                                                                                                |             | 2.780853423 | 30.3117509      | 0                      |
| 0                                   | 0                                                                                                          | 13.34479146 | 0           | 6.2320481       |                        |
| 0.001281778                         | 1                                                                                                          | AL590999.1  | 6           | 39881804        |                        |
| 39900071                            | -                                                                                                          | 6854        | antisense   | uncharacterized |                        |
| LOC100505635                        | [Source:NCBI gene;Acc:100505635]                                                                           |             |             | -               | 6 3                    |
| 31                                  | 0                                                                                                          | 0           | 0           | 0.047874237     | 0.019297947            |
| 0.209517378                         | 0                                                                                                          | 0           | 0           |                 |                        |
| ENSG00000136270                     | 3078.675019                                                                                                |             | 3079.33169  | 2871.793948     |                        |
| 3882.694828                         | 4111.455588                                                                                                |             | 3848.327267 | 3009.933552     |                        |
| 3947.492561                         | -0.391284897                                                                                               |             | 0.00128912  | 0.01304221      | TBRG4                  |
| 7                                   | 45100100                                                                                                   |             | 45112047    | -               | 5803                   |
| protein_coding                      | transforming growth factor beta regulator 4                                                                |             |             |                 |                        |
| [Source:HGNC Symbol;Acc:HGNC:17443] |                                                                                                            |             | -           | 2661 3322       | 2937                   |
| 3865                                | 4499                                                                                                       | 3922        | 25.07766039 | 25.23951559     |                        |
| 23.44519406                         | 32.20313437                                                                                                |             | 33.78485197 | 31.55012285     |                        |
| ENSG00000166592                     | 43.96454368                                                                                                |             | 113.0880392 | 92.89084954     |                        |
| 17.07782977                         | 26.50193645                                                                                                |             | 30.4176811  | 83.31447747     |                        |
| 24.66581577                         | 1.757940668                                                                                                |             | 0.001290818 | 0.013050746     | RRAD                   |
| 16                                  | 66921679                                                                                                   |             | 66925644    | -               | 1709                   |
| protein_coding                      | "RRAD, Ras related glycolysis inhibitor and calcium channel regulator [Source:HGNC Symbol;Acc:HGNC:10446]" |             |             | -               | 38                     |
| 122                                 | 95                                                                                                         | 17          | 29          | 31              | 1.216007481            |
| 3.147398445                         | 2.575040111                                                                                                |             | 0.480959021 | 0.739459739     |                        |
| 0.846770397                         |                                                                                                            |             |             |                 |                        |
| ENSG00000148541                     | 112.2252825                                                                                                |             | 118.649746  | 115.3802131     |                        |
| 37.16939421                         | 59.40089203                                                                                                |             | 43.17348286 | 115.4184139     |                        |
| 46.58125637                         | 1.307361331                                                                                                |             | 0.001294684 | 0.013081186     | FAM13C                 |
| 10                                  | 59246129                                                                                                   |             | 59363181    | -               | 6753                   |
| protein_coding                      | family with sequence similarity 13 member C                                                                |             |             |                 |                        |
| [Source:HGNC Symbol;Acc:HGNC:19371] |                                                                                                            |             | -           | 97 128          | 118                    |
| 37                                  | 65                                                                                                         | 44          | 0.785542519 | 0.835693796     |                        |
| 0.809445687                         | 0.264914781                                                                                                |             | 0.419445177 | 0.304159904     |                        |
| ENSG00000179604                     | 1114.154094                                                                                                |             | 1229.137213 | 1615.322983     |                        |
| 869.9647403                         | 842.578807                                                                                                 |             | 952.7602694 | 1319.538097     |                        |
| 888.4346056                         | 0.571158063                                                                                                |             | 0.001305039 | 0.0131771       |                        |
| CDC42EP4                            | 17                                                                                                         | 73283624    | 73312175    | -               | 5007                   |
| protein_coding                      | CDC42 effector protein 4 [Source:HGNC Symbol;Acc:HGNC:17147]                                               |             |             | -               | 963 1326 1652 866 922  |
| 971                                 | 10.51824805                                                                                                |             | 11.67615605 | 15.28392533     |                        |
| 8.362603716                         | 8.024388141                                                                                                |             | 9.052898984 |                 |                        |
| ENSG00000142544                     | 425.7618967                                                                                                |             | 987.202965  | 736.2822074     |                        |
| 1014.624004                         | 1341.5463                                                                                                  |             | 1377.626589 | 716.4156897     |                        |
| 1244.598965                         | -0.795513116                                                                                               |             | 0.001306887 | 0.013187046     | CTU1                   |
| 19                                  | 51097606                                                                                                   |             | 51108370    | -               | 2087                   |
| protein_coding                      | cytosolic thiouridylase subunit 1 [Source:HGNC Symbol;Acc:HGNC:29590]                                      |             |             | -               | 368 1065 753 1010 1468 |
| 1404                                | 9.643175758                                                                                                |             | 22.49889126 | 16.71379161     |                        |
| 23.39915322                         | 30.65223908                                                                                                |             | 31.40441404 |                 |                        |

|                                     |                                                        |             |             |        |  |
|-------------------------------------|--------------------------------------------------------|-------------|-------------|--------|--|
| ENSG00000169299                     | 1492.480562                                            | 1666.658151 | 1405.096324 |        |  |
| 995.537018                          | 1124.961509                                            | 1137.228787 | 1521.411679 |        |  |
| 1085.909105                         | 0.486550222                                            | 0.001309218 | 0.013201859 | PGM2   |  |
| 4                                   | 37826633                                               | 37862937    | + 3704      |        |  |
| protein_coding                      | phosphoglucomutase 2 [Source:HGNC                      |             |             |        |  |
| Symbol;Acc:HGNC:8906]               | -                                                      | 1290 1798   | 1437 991    | 1231   |  |
| 1159                                | 19.04642387                                            | 21.4019166  | 17.97166216 |        |  |
| 12.93611575                         | 14.48257121                                            | 14.60691472 |             |        |  |
| ENSG00000184220                     | 1819.900716                                            | 1507.222555 | 1770.792932 |        |  |
| 1359.194334                         | 1073.785356                                            | 1148.022158 | 1699.305401 |        |  |
| 1193.667283                         | 0.509475629                                            | 0.001311495 | 0.013209471 | CMSS1  |  |
| 3                                   | 99817834                                               | 100181732   | + 7210      |        |  |
| protein_coding                      | cms1 ribosomal small subunit homolog (yeast)           |             |             |        |  |
| [Source:HGNC Symbol;Acc:HGNC:28666] | -                                                      | 1573 1626   | 1811        |        |  |
| 1353                                | 1175 1170                                              | 11.93131112 | 9.943041098 |        |  |
| 11.63551583                         | 9.073268197                                            | 7.101681642 | 7.575244118 |        |  |
| ENSG00000175581                     | 934.825034                                             | 891.7269975 | 958.2424478 |        |  |
| 568.5912737                         | 670.77315                                              | 679.0011395 | 928.2648264 |        |  |
| 639.4551877                         | 0.537390579                                            | 0.001311701 | 0.013209471 | MRPL48 |  |
| 11                                  | 73787316                                               | 73865133    | + 4386      |        |  |
| protein_coding                      | mitochondrial ribosomal protein L48 [Source:HGNC       |             |             |        |  |
| Symbol;Acc:HGNC:16653]              | -                                                      | 808 962     | 980 566     | 734    |  |
| 692                                 | 10.07482349                                            | 9.670310139 | 10.35046603 |        |  |
| 6.239488956                         | 7.292661076                                            | 7.365182337 |             |        |  |
| ENSG00000271216                     | 233.7062585                                            | 363.3648472 | 200.4486753 |        |  |
| 402.835867                          | 664.3761309                                            | 423.8851044 | 265.839927  |        |  |
| 497.0323674                         | -0.901990207                                           | 0.001318188 | 0.013266052 |        |  |
| LINC01050                           | 13 42810366                                            | 42812562    | -           | 760    |  |
| lincRNA                             | long intergenic non-protein coding RNA 1050            |             |             |        |  |
| [Source:HGNC Symbol;Acc:HGNC:49044] | -                                                      | 202 392     | 205         |        |  |
| 401                                 | 727 432                                                | 14.53558416 | 22.74083634 |        |  |
| 12.49518598                         | 25.51126516                                            | 41.68496261 | 26.53482272 |        |  |
| ENSG00000196935                     | 691.8630821                                            | 606.2260461 | 504.5439827 |        |  |
| 948.3218416                         | 810.5937113                                            | 959.628778  | 600.8777036 |        |  |
| 906.1814436                         | -0.593401434                                           | 0.001319186 | 0.013267369 | SRGAP1 |  |
| 12                                  | 63844293                                               | 64162221    | + 26641     |        |  |
| protein_coding                      | SLIT-ROBO Rho GTPase activating protein 1 [Source:HGNC |             |             |        |  |
| Symbol;Acc:HGNC:17382]              | -                                                      | 598 654     | 516 944     | 887    |  |
| 978                                 | 1.227567478                                            | 1.082333707 | 0.897225555 |        |  |
| 1.713257684                         | 1.450880671                                            | 1.713698309 |             |        |  |
| ENSG00000139278                     | 1623.217231                                            | 1322.759278 | 1517.543142 |        |  |
| 900.1020869                         | 953.1558521                                            | 1206.895089 | 1487.839884 |        |  |
| 1020.051009                         | 0.544271426                                            | 0.001321477 | 0.013278557 | GLIPR1 |  |
| 12                                  | 75480680                                               | 75503853    | + 6273      |        |  |
| protein_coding                      | GLI pathogenesis related 1 [Source:HGNC                |             |             |        |  |
| Symbol;Acc:HGNC:17001]              | -                                                      | 1403 1427   | 1552 896    | 1043   |  |
| 1230                                | 12.23142611                                            | 10.02957761 | 11.46090428 |        |  |
| 6.90611711                          | 7.245487618                                            | 9.153261285 |             |        |  |
| ENSG00000227827                     | 9.255693406                                            | 11.12341369 | 16.62257307 |        |  |
| 118.5402302                         | 25.58807657                                            | 39.24862078 | 12.33389339 |        |  |

|                 |                                                                    |                                                                    |                                     |                      |             |
|-----------------|--------------------------------------------------------------------|--------------------------------------------------------------------|-------------------------------------|----------------------|-------------|
| 61.12564252     | -2.304001352                                                       | 0.001322036                                                        | 0.013278557                         |                      |             |
| AC138969.1      | 16                                                                 | 16356224                                                           | 16377507                            | +                    | 9932        |
|                 | unprocessed_pseudogene                                             | polycystic kidney disease 1 (autosomal dominant) (PKD1) pseudogene | -                                   | 8                    | 12          |
|                 | 28                                                                 | 40                                                                 | 0.044050211                         | 0.053269484          | 0.079289315 |
|                 | 0.574442433                                                        | 0.122851346                                                        | 0.188004964                         |                      |             |
| ENSG00000240751 | 19.66834849                                                        | 18.53902282                                                        | 8.800185745                         | 0                    |             |
|                 | 0.913859877                                                        | 0                                                                  | 15.66918568                         | 0.304619959          |             |
| 5.500011328     | 0.001322453                                                        | 1                                                                  | AC026348.1                          | 3                    |             |
| 113360267       | 113361319                                                          | +                                                                  | 1053                                | processed_pseudogene |             |
|                 | "Rab geranylgeranyltransferase, beta subunit (RABGGTB) pseudogene" | -                                                                  | 17                                  | 20                   | 9           |
|                 | 0.882907616                                                        | 0.837405063                                                        | 0.395928345                         | 0                    | 1           |
| 0.041383787     | 0                                                                  |                                                                    |                                     |                      | 0           |
| ENSG00000104980 | 1582.723572                                                        | 1832.582405                                                        | 1661.279509                         |                      |             |
| 2236.191122     | 2233.47354                                                         | 2399.071945                                                        | 1692.195162                         |                      |             |
| 2289.578869     | -0.435833586                                                       | 0.001330103                                                        | 0.013350808                         |                      | TIMM44      |
|                 | 19                                                                 | 7926718                                                            | 7943920                             | -                    | 4888        |
|                 | translocase of inner mitochondrial membrane 44                     | [Source:HGNC Symbol;Acc:HGNC:17316]                                | -                                   | 1368                 | 1977        |
|                 | 2445                                                               | 15.3055737                                                         | 17.83238492                         | 16.10143701          | 2444        |
| 22.0188777      | 21.78856368                                                        | 23.35036653                                                        |                                     |                      |             |
| ENSG00000146826 | 254.5315687                                                        | 322.578997                                                         | 401.875149                          |                      |             |
| 661.0124701     | 446.8774801                                                        | 560.2740616                                                        | 326.3285716                         |                      |             |
| 556.0546706     | -0.767169854                                                       | 0.001332115                                                        | 0.013362229                         |                      |             |
| C7orf43 7       | 100154420                                                          | 100158715                                                          | -                                   | 3255                 |             |
|                 | protein_coding                                                     | chromosome 7 open reading frame 43                                 | [Source:HGNC Symbol;Acc:HGNC:25604] | -                    | 220         |
|                 | 571                                                                | 3.696293092                                                        | 4.713702934                         | 5.849157083          | 489         |
| 9.774085127     | 6.546609916                                                        | 8.189005281                                                        |                                     |                      |             |
| ENSG00000196954 | 1257.617342                                                        | 1554.497063                                                        | 1067.75587                          |                      |             |
| 1570.155761     | 2199.660725                                                        | 2051.721651                                                        | 1293.290092                         |                      |             |
| 1940.512712     | -0.58529718                                                        | 0.001335488                                                        | 0.013387285                         |                      | CASP4       |
|                 | 11                                                                 | 104942866                                                          | 104969436                           | -                    | 7256        |
|                 | protein_coding                                                     | caspase 4                                                          | [Source:HGNC Symbol;Acc:HGNC:1505]  | -                    |             |
|                 | 1087                                                               | 1677                                                               | 1092                                | 1563                 | 2407        |
|                 | 10.18989588                                                        | 6.971525498                                                        | 10.41508744                         | 14.45564299          |             |
|                 | 13.45249362                                                        |                                                                    |                                     |                      |             |
| ENSG00000184381 | 76.3594706                                                         | 95.47596751                                                        | 93.86864795                         |                      |             |
| 186.8515493     | 162.6670582                                                        | 189.3745953                                                        | 88.56802869                         |                      |             |
| 179.6310676     | -1.017863598                                                       | 0.001340383                                                        | 0.013427546                         |                      | PLA2G6      |
|                 | 22                                                                 | 38111495                                                           | 38205690                            | -                    | 6758        |
|                 | protein_coding                                                     | phospholipase A2 group VI                                          | [Source:HGNC Symbol;Acc:HGNC:9039]  | -                    | 66          |
|                 | 193                                                                | 0.534097396                                                        | 0.671974813                         | 0.65804486           | 186         |
| 1.330748463     | 1.147784651                                                        | 1.333168849                                                        |                                     |                      | 178         |
| ENSG00000153551 | 428.07582                                                          | 438.4478896                                                        | 518.2331606                         |                      |             |
| 201.9202226     | 317.1093775                                                        | 294.3646558                                                        | 461.5856234                         |                      |             |
| 271.1314186     | 0.767136608                                                        | 0.001343113                                                        | 0.013446082                         |                      | CMTM7       |
|                 | 3                                                                  | 32391671                                                           | 32483067                            | +                    | 3751        |



|                        |                                                    |                                     |                |             |              |      |        |  |
|------------------------|----------------------------------------------------|-------------------------------------|----------------|-------------|--------------|------|--------|--|
| protein_coding         | CKLF like MARVEL transmembrane domain containing 7 |                                     |                |             |              |      |        |  |
|                        | [Source:HGNC Symbol;Acc:HGNC:19178]                | -                                   | 370            | 473         | 530          |      |        |  |
|                        | 201                                                | 347                                 | 300            | 5.394477334 | 5.559657457  |      |        |  |
| 6.545325685            | 2.590897368                                        |                                     | 4.031261848    | 3.733534995 |              |      |        |  |
| ENSG0000049449         | 2681.837164                                        |                                     | 2778.99952     | 3082.998406 |              |      |        |  |
| 2157.834021            | 1983.989794                                        |                                     | 2215.584643    | 2847.94503  |              |      |        |  |
| 2119.136153            | 0.426650612                                        |                                     | 0.001347219    | 0.013478363 |              |      | RCN1   |  |
|                        | 11                                                 | 32090904                            | 32105755       | +           | 4675         |      |        |  |
| protein_coding         | reticulocalbin 1                                   | [Source:HGNC Symbol;Acc:HGNC:9934]  |                |             |              |      |        |  |
|                        | -                                                  | 2318                                | 2998           | 3153        | 2148         | 2171 | 2258   |  |
| 27.11605644            | 28.27378631                                        |                                     | 31.24243042    | 22.21538675 |              |      |        |  |
| 20.23656545            | 22.54697889                                        |                                     |                |             |              |      |        |  |
| ENSG0000086475         | 1586.194457                                        |                                     | 1615.675838    | 1876.395161 |              |      |        |  |
| 1315.997471            | 1215.433637                                        |                                     | 1086.20558     | 1692.755152 |              |      |        |  |
| 1205.878896            | 0.48947725                                         |                                     | 0.001351103    | 0.013508381 |              |      | SEPHS1 |  |
|                        | 10                                                 | 13317424                            | 13348298       | -           | 3888         |      |        |  |
| protein_coding         | selenophosphate synthetase 1                       | [Source:HGNC                        |                |             |              |      |        |  |
| Symbol;Acc:HGNC:19685] | -                                                  | 1371                                | 1743           | 1919        | 1310         | 1330 |        |  |
|                        | 1107                                               | 19.28439024                         | 19.76537638    | 22.8639454  |              |      |        |  |
| 16.29094419            | 14.90678482                                        |                                     | 13.29129816    |             |              |      |        |  |
| ENSG00000128165        | 57.84808379                                        |                                     | 90.8412118     | 71.37928438 |              |      |        |  |
| 178.8149235            | 175.4610965                                        |                                     | 131.4828796    | 73.35619332 |              |      |        |  |
| 161.9196332            | -1.138979566                                       |                                     | 0.001356603    | 0.013554503 |              |      | ADM2   |  |
|                        | 22                                                 | 50481556                            | 50486440       | +           | 4276         |      |        |  |
| protein_coding         | adrenomedullin 2                                   | [Source:HGNC Symbol;Acc:HGNC:28898] |                |             |              |      |        |  |
|                        | -                                                  | 50                                  | 98             | 73          | 178          | 192  | 134    |  |
| 0.63948008             | 1.010467471                                        |                                     | 0.790838164    | 2.012720742 |              |      |        |  |
| 1.956690471            | 1.46289494                                         |                                     |                |             |              |      |        |  |
| ENSG00000113361        | 9.255693406                                        |                                     | 7.415609127    | 19.55596832 | 0            |      |        |  |
|                        | 0                                                  | 12.07575695                         | 0              | 6.08748101  |              |      |        |  |
| 0.001361354            | 1                                                  | CDH6                                | 5              | 31193750    | 31329146     |      |        |  |
|                        | +                                                  | 12379                               | protein_coding | cadherin 6  | [Source:HGNC |      |        |  |
| Symbol;Acc:HGNC:1765]  | -                                                  | 8                                   | 8              | 20          | 0            | 0    |        |  |
|                        | 0                                                  | 0.035342652                         | 0.028493013    | 0.074842259 | 0            |      |        |  |
|                        | 0                                                  | 0                                   |                |             |              |      |        |  |
| ENSG00000144283        | 1200.926219                                        |                                     | 1207.817337    | 1442.252664 |              |      |        |  |
| 1031.701834            | 812.421431                                         |                                     | 779.0851225    | 1283.665407 |              |      |        |  |
| 874.4027958            | 0.554274456                                        |                                     | 0.001364186    | 0.013621371 |              |      | PKP4   |  |
|                        | 2                                                  | 158456964                           | 158682879      | +           | 9525         |      |        |  |
| protein_coding         | plakophilin 4                                      | [Source:HGNC Symbol;Acc:HGNC:9026]  |                |             |              |      |        |  |
|                        | -                                                  | 1038                                | 1303           | 1475        | 1027         | 889  | 794    |  |
| 5.959736821            | 6.03133414                                         |                                     | 7.173473392    | 5.213227479 |              |      |        |  |
| 4.067198553            | 3.891361286                                        |                                     |                |             |              |      |        |  |
| ENSG00000196967        | 80.9873173                                         |                                     | 77.86389583    | 57.69010655 |              |      |        |  |
| 191.8744404            | 151.7007397                                        |                                     | 132.4640951    | 72.18043989 |              |      |        |  |
| 158.6797584            | -1.137392738                                       |                                     | 0.001365963    | 0.01363021  |              |      |        |  |
| ZNF585A                | 19                                                 | 37106734                            | 37172741       | -           | 10758        |      |        |  |
| protein_coding         | zinc finger protein 585A                           | [Source:HGNC                        |                |             |              |      |        |  |
| Symbol;Acc:HGNC:26305] | zf-C2H2                                            | 70                                  | 84             | 59          | 191          | 166  |        |  |
|                        | 135                                                | 0.355845283                         | 0.344256147    | 0.254052181 |              |      |        |  |

|                                     |                                                     |             |             |        |  |
|-------------------------------------|-----------------------------------------------------|-------------|-------------|--------|--|
| 0.858426357                         | 0.672411521                                         | 0.585798512 |             |        |  |
| ENSG00000204956                     | 38.1797353                                          | 21.31987624 | 31.28954932 |        |  |
| 82.37541421                         | 90.47212786                                         | 87.32818123 | 30.26305362 |        |  |
| 86.7252411                          | -1.524659965                                        | 0.001369643 | 0.013653253 |        |  |
| PCDHGA1 5                           | 141330571                                           | 141512981   | + 6252      |        |  |
| protein_coding                      | "protocadherin gamma subfamily A, 1 [Source:HGNC    |             |             |        |  |
| Symbol;Acc:HGNC:8696]"              | -                                                   | 33 23       | 32 82       | 99     |  |
| 89                                  | 0.288662045                                         | 0.162197003 | 0.237101043 |        |  |
| 0.634155991                         | 0.690040884                                         | 0.664533797 |             |        |  |
| ENSG00000182768                     | 994.9870411                                         | 936.2206523 | 934.7752859 |        |  |
| 1465.679626                         | 1502.385638                                         | 1146.059727 | 955.3276597 |        |  |
| 1371.374997                         | -0.521864496                                        | 0.001370059 | 0.013653253 | NGRN   |  |
| 15                                  | 90265659                                            | 90278141    | + 7694      |        |  |
| protein_coding                      | "neugrin, neurite outgrowth associated [Source:HGNC |             |             |        |  |
| Symbol;Acc:HGNC:18077]"             | -                                                   | 860 1010    | 956 1459    | 1644   |  |
| 1168                                | 6.112811195                                         | 5.787661859 | 5.755832752 |        |  |
| 9.168627451                         | 9.311255182                                         | 7.08658004  |             |        |  |
| ENSG00000130635                     | 4723.874522                                         | 2800.319396 | 7959.279108 |        |  |
| 2138.747035                         | 1559.044951                                         | 2097.838781 | 5161.157675 |        |  |
| 1931.876922                         | 1.41771196                                          | 0.001372595 | 0.013661925 | COL5A1 |  |
| 9                                   | 134641774                                           | 134844843   | + 11189     |        |  |
| protein_coding                      | collagen type V alpha 1 chain [Source:HGNC          |             |             |        |  |
| Symbol;Acc:HGNC:2209]"              | -                                                   | 4083 3021   | 8140 2129   | 1706   |  |
| 2138                                | 19.95642843                                         | 11.90401346 | 33.70044122 |        |  |
| 9.199952903                         | 6.6442559                                           | 8.919950881 |             |        |  |
| ENSG0000020922                      | 1839.569064                                         | 1677.781565 | 1544.921498 |        |  |
| 1041.747616                         | 1198.984159                                         | 1333.471891 | 1687.424042 |        |  |
| 1191.401222                         | 0.501821754                                         | 0.001372716 | 0.013661925 | MRE11  |  |
| 11                                  | 94415578                                            | 94493908    | - 7689      |        |  |
| protein_coding                      | "MRE11 homolog, double strand break repair nuclease |             |             |        |  |
| [Source:HGNC Symbol;Acc:HGNC:7230]" | -                                                   |             | 1590 1810   | 1580   |  |
| 1037                                | 1312 1359                                           | 11.30894199 | 10.37869315 |        |  |
| 9.518963945                         | 6.520938615                                         | 7.435712198 | 8.250791864 |        |  |
| ENSG00000146476                     | 755.4959742                                         | 742.4878638 | 571.034275  |        |  |
| 268.2223853                         | 475.2071363                                         | 468.0398028 | 689.6727044 |        |  |
| 403.8231081                         | 0.771411623                                         | 0.00137362  | 0.013662019 | ARMT1  |  |
| 6                                   | 151452258                                           | 151470101   | + 2819      |        |  |
| protein_coding                      | acidic residue methyltransferase 1 [Source:HGNC     |             |             |        |  |
| Symbol;Acc:HGNC:17872]"             | -                                                   | 653 801     | 584 267     | 520    |  |
| 477                                 | 12.66813895                                         | 12.52770154 | 9.59666262  |        |  |
| 4.579493026                         | 8.038349139                                         | 7.898949531 |             |        |  |
| ENSG00000198919                     | 777.4782461                                         | 542.2664174 | 790.0611203 |        |  |
| 515.3486279                         | 395.7013269                                         | 394.4486388 | 703.2685946 |        |  |
| 435.1661979                         | 0.69221981                                          | 0.001375194 | 0.013668787 | DZIP3  |  |
| 3                                   | 108589682                                           | 108694846   | + 6972      |        |  |
| protein_coding                      | DAZ interacting zinc finger protein 3 [Source:HGNC  |             |             |        |  |
| Symbol;Acc:HGNC:30938]"             | -                                                   | 672 585     | 808 513     | 433    |  |
| 402                                 | 5.271164957                                         | 3.699409825 | 5.368543027 |        |  |
| 3.557633477                         | 2.706382121                                         | 2.691625973 |             |        |  |
| ENSG00000013619                     | 437.3315134                                         | 437.5209385 | 515.2997653 |        |  |

|                                    |                                                  |             |                |             |
|------------------------------------|--------------------------------------------------|-------------|----------------|-------------|
| 211.9660048                        | 247.6560268                                      | 350.2939405 | 463.3840724    |             |
| 269.9719907                        | 0.779598927                                      | 0.001385696 | 0.013764222    | MAMLD1      |
| X                                  | 150361422                                        | 150514178   | + 5958         |             |
| protein_coding                     | mastermind like domain containing 1 [Source:HGNC |             |                |             |
| Symbol;Acc:HGNC:2568]              | -                                                | 378 472     | 527 211        | 271         |
| 357                                | 3.469652765                                      | 3.492813989 | 4.097439711    |             |
| 1.712313075                        | 1.982108344                                      | 2.797137097 |                |             |
| ENSG00000137103                    | 240.6480285                                      | 371.7074075 | 273.7835565    |             |
| 530.4173012                        | 535.5218882                                      | 426.828751  | 295.3796642    |             |
| 497.5893135                        | -0.750619678                                     | 0.001391167 | 0.013809587    | TMEM8B      |
| 9                                  | 35814451                                         | 35865518    | + 16165        |             |
| protein_coding                     | transmembrane protein 8B [Source:HGNC            |             |                |             |
| Symbol;Acc:HGNC:21427]             | -                                                | 208 401     | 280 528        | 586         |
| 435                                | 0.703691554                                      | 1.093711105 | 0.802388652    |             |
| 1.579281071                        | 1.579721412                                      | 1.256202299 |                |             |
| ENSG00000136244                    | 35.86581195                                      | 52.83621503 | 55.73450972    |             |
| 12.05493866                        | 10.05245865                                      | 11.77458623 | 48.14551223    |             |
| 11.29399452                        | 2.094780046                                      | 0.001393536 | 0.013820299    | IL6         |
| 7                                  | 22725884                                         | 22732002    | + 2069         |             |
| protein_coding                     | interleukin 6 [Source:HGNC                       |             |                |             |
| Symbol;Acc:HGNC:6018]              | -                                                | 31 57       | 57 12          | 11 12       |
| 0.819399918                        | 1.214642081                                      | 1.27619436  | 0.280428386    |             |
| 0.231681199                        | 0.270748956                                      |             |                |             |
| ENSG00000196646                    | 174.701213                                       | 132.5540131 | 106.5800274    |             |
| 290.3231062                        | 273.2441033                                      | 225.6795695 | 137.9450845    |             |
| 263.0822597                        | -0.934139899                                     | 0.001394054 | 0.013820299    | ZNF136      |
| 19                                 | 12163064                                         | 12189881    | + 5425         |             |
| protein_coding                     | zinc finger protein 136 [Source:HGNC             |             |                |             |
| Symbol;Acc:HGNC:12920]             | zf-C2H2                                          | 151 143     | 109 289        | 299         |
| 230                                | 1.522200701                                      | 1.162171585 | 0.930741784    |             |
| 2.575723953                        | 2.401762411                                      | 1.979129122 |                |             |
| ENSG00000167969                    | 437.3315134                                      | 507.9692252 | 534.8557336    |             |
| 262.1949159                        | 360.0607917                                      | 286.5149317 | 493.3854907    |             |
| 302.9235464                        | 0.703668442                                      | 0.001396387 | 0.013829118    | ECI1        |
| 16                                 | 2239395 2252300                                  | - 3234      | protein_coding | enoyl-      |
| CoA delta isomerase 1 [Source:HGNC |                                                  |             |                |             |
| Symbol;Acc:HGNC:2703]              | -                                                |             |                |             |
| 378                                | 548 547                                          | 261 394     | 292            | 6.392143219 |
| 7.470927138                        | 7.835194225                                      | 3.90212977  | 5.30902541     |             |
| 4.214915494                        |                                                  |             |                |             |
| ENSG00000158246                    | 65.94681552                                      | 63.95962872 | 66.4902923     |             |
| 10.04578222                        | 0.913859877                                      | 25.51160351 | 65.46557884    |             |
| 12.15708187                        | 2.434074373                                      | 0.001396753 | 0.013829118    | TENT5B      |
| 1                                  | 27005020                                         | 27012836    | - 2368         |             |
| protein_coding                     | terminal nucleotidyltransferase 5B [Source:HGNC  |             |                |             |
| Symbol;Acc:HGNC:28273]             | -                                                | 57 69       | 68 10          | 1           |
| 26                                 | 1.31639999                                       | 1.284698895 | 1.330238982    |             |
| 0.204182971                        | 0.018402503                                      | 0.512551709 |                |             |
| ENSG00000146938                    | 19.66834849                                      | 6.488657986 | 31.28954932    |             |
| 1.004578222                        | 0                                                | 0.981215519 | 19.14885193    | 0.661931247 |
| 4.878512147                        | 0.001399825                                      | 1           | NLGN4X X       |             |

|                                     |                    |                                     |              |                |                       |                |             |      |      |
|-------------------------------------|--------------------|-------------------------------------|--------------|----------------|-----------------------|----------------|-------------|------|------|
| 5840637                             | 6228863            | -                                   | 7441         | protein_coding | neurologin 4 X-linked |                |             |      |      |
| [Source:HGNC Symbol;Acc:HGNC:14287] |                    |                                     |              | -              | 17                    | 7              | 32          |      |      |
|                                     | 1                  | 0                                   | 1            | 0.124943115    | 0.041476366           |                |             |      |      |
| 0.199214584                         | 0.006497853        |                                     | 0            | 0.00627357     |                       |                |             |      |      |
| ENSG00000173705                     | 178.1720981        |                                     |              | 126.0653552    | 293.3395248           |                |             |      |      |
| 92.42119643                         | 54.83159264        |                                     |              | 103.0276295    | 199.192326            |                |             |      |      |
| 83.42680621                         | 1.256870699        |                                     |              | 0.001400147    | 0.013849706           |                | SUSD5       |      |      |
|                                     | 3                  | 33150042                            |              | 33219215       | -                     | 5008           |             |      |      |
| protein_coding                      | sushi domain       | containing 5                        | [Source:HGNC |                |                       |                |             |      |      |
| Symbol;Acc:HGNC:29061]              |                    |                                     |              | -              | 154                   | 136            | 300         | 92   | 60   |
|                                     | 105                | 1.681710026                         |              | 1.197315338    | 2.774977016           |                |             |      |      |
| 0.88822854                          | 0.522090184        |                                     |              | 0.978748286    |                       |                |             |      |      |
| ENSG00000147872                     | 12651.37592        |                                     |              | 13849.577      | 6104.395512           |                |             |      |      |
| 23429.77787                         | 32526.10076        |                                     |              | 20133.56124    | 10868.44948           |                |             |      |      |
| 25363.14662                         | -1.222598616       |                                     |              | 0.001400644    | 0.013849706           |                | PLIN2       |      |      |
|                                     | 9                  | 19108375                            |              | 19149290       | -                     | 5086           |             |      |      |
| protein_coding                      | perilipin 2        | [Source:HGNC Symbol;Acc:HGNC:248]   |              |                |                       |                |             | -    |      |
|                                     | 10935              | 14941                               | 6243         | 23323          | 35592                 | 20519          | 117.5809986 |      |      |
|                                     | 129.5201289        | 56.861647                           |              | 221.7222479    | 304.9542109           |                |             |      |      |
|                                     | 188.3327602        |                                     |              |                |                       |                |             |      |      |
| ENSG00000197959                     | 179.3290597        |                                     |              | 164.0703519    | 220.9824421           |                |             |      |      |
| 106.4852915                         | 92.29984762        |                                     |              | 78.49724156    | 188.1272846           |                |             |      |      |
| 92.42746024                         | 1.025622827        |                                     |              | 0.001403298    | 0.013866981           |                | DNM3        |      |      |
|                                     | 1                  | 171841498                           |              | 172418466      | +                     | 11329          |             |      |      |
| protein_coding                      | dynamamin 3        | [Source:HGNC Symbol;Acc:HGNC:29125] |              |                |                       |                |             | -    |      |
|                                     | 155                | 177                                 | 226          | 106            | 101                   | 80             | 0.748229512 |      |      |
|                                     | 0.688835701        | 0.92410074                          |              | 0.452392613    | 0.388497649           |                |             |      |      |
|                                     | 0.329643446        |                                     |              |                |                       |                |             |      |      |
| ENSG00000091317                     | 3038.18136         |                                     |              | 2583.41283     | 2676.234265           |                |             |      |      |
| 2150.801973                         | 2063.495603        |                                     |              | 1935.93822     | 2765.942818           |                |             |      |      |
| 2050.078599                         | 0.431826794        |                                     |              | 0.001404916    | 0.013873995           |                | CMTM6       |      |      |
|                                     | 3                  | 32481312                            |              | 32503408       | -                     | 4413           |             |      |      |
| protein_coding                      | CKLF like MARVEL   | transmembrane                       | domain       | containing 6   |                       |                |             |      |      |
| [Source:HGNC Symbol;Acc:HGNC:19177] |                    |                                     |              | -              | 2626                  | 2787           | 2737        |      |      |
|                                     | 2141               | 2258                                | 1973         | 32.5428442     | 27.84434456           |                |             |      |      |
| 28.73050937                         | 23.45762052        |                                     |              | 22.29711162    | 20.87080468           |                |             |      |      |
| ENSG00000159733                     | 102.9695891        |                                     |              | 116.7958437    | 77.24607488           |                |             |      |      |
| 239.0896168                         | 198.3075934        |                                     |              | 168.7690693    | 99.00383592           |                |             |      |      |
| 202.0554265                         | -1.028874877       |                                     |              | 0.001419924    | 0.014013152           |                |             |      |      |
| ZFYVE28                             | 4                  | 2269582                             | 2418663      | -              | 9624                  | protein_coding | zinc        |      |      |
| finger FYVE-type                    | containing 28      | [Source:HGNC Symbol;Acc:HGNC:29334] |              |                |                       |                |             |      |      |
|                                     | -                  | 89                                  | 126          | 79             | 238                   | 217            | 172         |      |      |
| 0.505742097                         | 0.577229993        |                                     |              | 0.380254124    | 1.195700908           |                |             |      |      |
| 0.982568229                         | 0.834293516        |                                     |              |                |                       |                |             |      |      |
| ENSG00000179820                     | 4030.854478        |                                     |              | 3891.340889    | 2818.015035           |                |             |      |      |
| 4047.445657                         | 5596.477889        |                                     |              | 6425.980437    | 3580.070134           |                |             |      |      |
| 5356.634661                         | -0.581473396       |                                     |              | 0.001421397    | 0.014018647           |                | MYADM       |      |      |
|                                     | 19                 | 53866223                            |              | 53876437       | +                     | 3675           |             |      |      |
| protein_coding                      | myeloid associated | differentiation                     | marker       | [Source:HGNC   |                       |                |             |      |      |
| Symbol;Acc:HGNC:7544]               |                    |                                     |              | -              | 3484                  | 4198           | 2882        | 4029 | 6124 |

|                        |                                                        |             |             |        |
|------------------------|--------------------------------------------------------|-------------|-------------|--------|
| 6549                   | 51.84603106                                            | 50.36386473 | 36.32779924 |        |
| 53.00796606            | 72.61668787                                            | 83.18857459 |             |        |
| ENSG00000186812        | 570.3821061                                            | 540.4125151 | 394.0527617 |        |
| 746.401619             | 801.4551125                                            | 768.2917517 | 501.6157943 |        |
| 772.0494944            | -0.622890704                                           | 0.001422757 | 0.014023005 | ZNF397 |
| 18                     | 35241030                                               | 35267133    | + 8710      |        |
| protein_coding         | zinc finger protein 397 [Source:HGNC                   |             |             |        |
| Symbol;Acc:HGNC:18818] | zf-C2H2                                                | 493 583     | 403 743     | 877    |
| 783                    | 3.095447745                                            | 2.951102933 | 2.143331501 |        |
| 4.124505388            | 4.387731422                                            | 4.19652334  |             |        |
| ENSG00000245532        | 12189.74822                                            | 13641.93994 | 10126.0804  |        |
| 18505.33543            | 12779.41653                                            | 22318.72821 | 11985.92285 |        |
| 17867.82672            | -0.575993643                                           | 0.001424413 | 0.014030284 | NEAT1  |
| 11                     | 65422774                                               | 65445540    | + 22767     |        |
| lincRNA                | nuclear paraspeckle assembly transcript 1 [Source:HGNC |             |             |        |
| Symbol;Acc:HGNC:30815] | -                                                      | 10536 14717 | 10356 18421 | 13984  |
| 22746                  | 25.30839868                                            | 28.50016933 | 21.0711719  |        |
| 39.12087965            | 26.76604511                                            | 46.63857399 |             |        |
| ENSG00000136379        | 499.8074439                                            | 351.3144824 | 439.0314889 |        |
| 299.3643102            | 213.8432113                                            | 242.3602333 | 430.0511384 |        |
| 251.8559183            | 0.771525038                                            | 0.001433849 | 0.014107775 |        |
| ABHD17C 15             | 80679684                                               | 80755621    | + 3627      |        |
| protein_coding         | abhydrolase domain containing 17C [Source:HGNC         |             |             |        |
| Symbol;Acc:HGNC:26925] | -                                                      | 432 379     | 449 298     | 234    |
| 247                    | 6.513747267                                            | 4.607078501 | 5.734575055 |        |
| 3.972555057            | 2.811427571                                            | 3.179035909 |             |        |
| ENSG00000169738        | 953.3364208                                            | 1035.404424 | 1152.824333 |        |
| 692.154395             | 739.3126408                                            | 761.4232431 | 1047.188393 |        |
| 730.9634263            | 0.518954867                                            | 0.001434126 | 0.014107775 | DCXR   |
| 17                     | 82035136                                               | 82037732    | - 1902      |        |
| protein_coding         | dicarbonyl and L-xylulose reductase [Source:HGNC       |             |             |        |
| Symbol;Acc:HGNC:18985] | -                                                      | 824 1117    | 1179 689    | 809    |
| 776                    | 23.69252851                                            | 25.89265701 | 28.71479686 |        |
| 17.51499129            | 18.53517141                                            | 19.04571339 |             |        |
| ENSG00000188064        | 489.3947888                                            | 714.6793296 | 436.0980936 |        |
| 779.5527003            | 990.6241071                                            | 862.4884416 | 546.7240707 |        |
| 877.555083             | -0.681960939                                           | 0.001444159 | 0.014197339 | WNT7B  |
| 22                     | 45920362                                               | 45977129    | - 5051      |        |
| protein_coding         | Wnt family member 7B [Source:HGNC                      |             |             |        |
| Symbol;Acc:HGNC:12787] | -                                                      | 423 771     | 446 776     | 1084   |
| 879                    | 4.579918098                                            | 6.729936516 | 4.090345056 |        |
| 7.428233881            | 9.35212949                                             | 8.123768564 |             |        |
| ENSG00000105193        | 19950.64714                                            | 20680.27995 | 21869.43938 |        |
| 24327.8708             | 27127.93046                                            | 31585.32757 | 20833.45549 |        |
| 27680.37628            | -0.409949762                                           | 0.001462414 | 0.014367563 | RPS16  |
| 19                     | 39433207                                               | 39435948    | - 2603      |        |
| protein_coding         | ribosomal protein S16 [Source:HGNC                     |             |             |        |
| Symbol;Acc:HGNC:10396] | -                                                      | 17244 22310 | 22366 24217 | 29685  |
| 32190                  | 362.2918453                                            | 377.8847451 | 398.0307347 |        |
| 449.8289375            | 496.9600559                                            | 577.288418  |             |        |

|                                      |                                                 |             |                |             |  |
|--------------------------------------|-------------------------------------------------|-------------|----------------|-------------|--|
| ENSG00000160695                      | 1427.690708                                     | 1481.267923 | 1301.449692    |             |  |
| 2004.133553                          | 1901.742405                                     | 1819.173573 | 1403.469441    |             |  |
| 1908.349844                          | -0.443308453                                    | 0.001466892 | 0.014402299    | VPS11       |  |
| 11                                   | 119067692                                       | 119081978   | + 5907         |             |  |
| protein_coding                       | "VPS11, CORVET/HOPS core subunit [Source:HGNC   |             |                |             |  |
| Symbol;Acc:HGNC:14583]"              | -                                               | 1234 1598   | 1331 1995      | 2081        |  |
| 1854                                 | 11.42464993                                     | 11.92734447 | 10.43790982    |             |  |
| 16.32966012                          | 15.35195565                                     | 14.65172622 |                |             |  |
| ENSG00000173153                      | 1023.911083                                     | 1695.393637 | 1409.985316    |             |  |
| 2014.179335                          | 1957.487857                                     | 2184.185746 | 1376.430012    |             |  |
| 2051.95098                           | -0.575190525                                    | 0.001470846 | 0.014431849    | ESRRA       |  |
| 11                                   | 64305572                                        | 64316743    | + 3030         |             |  |
| protein_coding                       | estrogen related receptor alpha [Source:HGNC    |             |                |             |  |
| Symbol;Acc:HGNC:3471]                | ESR-like                                        | 885         | 1829 1442      | 2005        |  |
| 2142                                 | 2226                                            | 15.97332599 | 26.61368639    | 22.04576063 |  |
| 31.99432595                          | 30.80600884                                     | 34.29482312 |                |             |  |
| ENSG00000166508                      | 7696.109067                                     | 8438.036235 | 8836.364287    |             |  |
| 6105.826433                          | 5784.733024                                     | 6962.705326 | 8323.503196    |             |  |
| 6284.421595                          | 0.405511339                                     | 0.001481732 | 0.014526994    | MCM7        |  |
| 7                                    | 100092728                                       | 100101940   | - 4386         |             |  |
| protein_coding                       | minichromosome maintenance complex component 7  |             |                |             |  |
| [Source:HGNC                         | Symbol;Acc:HGNC:6950]                           | -           | 6652 9103      | 9037        |  |
| 6078                                 | 6330 7096                                       | 82.94273004 | 91.50606361    |             |  |
| 95.44608313                          | 67.00285137                                     | 62.89175015 | 75.52504893    |             |  |
| ENSG00000163704                      | 119.1670526                                     | 178.9015702 | 140.8029719    |             |  |
| 282.2864804                          | 275.985683                                      | 249.2287419 | 146.2905316    |             |  |
| 269.1669684                          | -0.877113853                                    | 0.001482443 | 0.014526994    | PRRT3       |  |
| 3                                    | 9945542 9952394                                 | - 3939      | protein_coding |             |  |
| proline rich transmembrane protein 3 | [Source:HGNC                                    |             |                |             |  |
| Symbol;Acc:HGNC:26591]               | -                                               | 103 193     | 144 281        | 302         |  |
| 254                                  | 1.430032661                                     | 2.160256329 | 1.693475692    |             |  |
| 3.449225241                          | 3.341023727                                     | 3.01018905  |                |             |  |
| ENSG00000274211                      | 935.9819957                                     | 963.1022353 | 1042.333112    |             |  |
| 1348.143974                          | 1386.325434                                     | 1323.659736 | 980.4724475    |             |  |
| 1352.709715                          | -0.464118189                                    | 0.001489308 | 0.014584914    | SOCS7       |  |
| 17                                   | 38352228                                        | 38405593    | + 8621         |             |  |
| protein_coding                       | suppressor of cytokine signaling 7 [Source:HGNC |             |                |             |  |
| Symbol;Acc:HGNC:29846]               | -                                               | 809 1039    | 1066 1342      | 1517        |  |
| 1349                                 | 5.131987493                                     | 5.313636732 | 5.727986891    |             |  |
| 7.52655236                           | 7.668078204                                     | 7.304665621 |                |             |  |
| ENSG00000077312                      | 934.825034                                      | 1426.577806 | 1842.172216    |             |  |
| 871.9738967                          | 788.6610742                                     | 949.8166228 | 1401.191685    |             |  |
| 870.1505313                          | 0.688037025                                     | 0.001492355 | 0.014602294    | SNRPA       |  |
| 19                                   | 40750637                                        | 40765389    | + 2361         |             |  |
| protein_coding                       | small nuclear ribonucleoprotein polypeptide A   |             |                |             |  |
| [Source:HGNC                         | Symbol;Acc:HGNC:11151]                          | -           | 808 1539       | 1884        |  |
| 868                                  | 863 968                                         | 18.71587287 | 28.73932679    |             |  |
| 36.96471543                          | 17.77562807                                     | 15.92844596 | 19.13927163    |             |  |
| ENSG00000077549                      | 5147.322495                                     | 5090.815666 | 5355.401925    |             |  |
| 3808.35604                           | 4202.841576                                     | 3998.453242 | 5197.846695    |             |  |

|                                       |                                                     |             |                   |       |
|---------------------------------------|-----------------------------------------------------|-------------|-------------------|-------|
| 4003.216953                           | 0.376707323                                         | 0.001494044 | 0.014602294       | CAPZB |
| 1                                     | 19338776                                            | 19485539    | - 3238            |       |
| protein_coding                        | capping actin protein of muscle Z-line subunit beta |             |                   |       |
| [Source:HGNC Symbol;Acc:HGNC:1491]    | -                                                   | 4449        | 5492 5477         |       |
| 3791                                  | 4599 4075                                           | 75.14157158 | 74.78037559       |       |
| 78.35529541                           | 56.608045                                           | 61.8935172  | 58.74850298       |       |
| ENSG00000111077                       | 609.7188031                                         | 790.6893231 | 990.5097956       |       |
| 450.0510435                           | 519.9862702                                         | 535.7436736 | 796.9726406       |       |
| 501.9269958                           | 0.667702547                                         | 0.001494773 | 0.014602294       | TNS2  |
| 12                                    | 53046969                                            | 53064372    | + 8093            |       |
| protein_coding                        | tensin 2 [Source:HGNC Symbol;Acc:HGNC:19737]        |             |                   | -     |
| 527                                   | 853 1013                                            | 448 569     | 546 3.561195267   |       |
| 4.647008306                           | 5.798322418                                         | 2.676515052 | 3.063806433       |       |
| 3.149409536                           |                                                     |             |                   |       |
| ENSG00000233117                       | 513.690984                                          | 374.4882609 | 435.1202952       |       |
| 238.0850386                           | 306.1430589                                         | 250.2099575 | 441.0998467       |       |
| 264.812685                            | 0.734468301                                         | 0.001495384 | 0.014602294       |       |
| LINC00702                             | 10 4201141                                          | 4243912 -   | 6785 lincRNA long |       |
| intergenic non-protein coding RNA 702 | [Source:HGNC                                        |             |                   |       |
| Symbol;Acc:HGNC:44676]                | -                                                   | 444 404     | 445 237 335       |       |
| 255                                   | 3.57872091                                          | 2.625218591 | 3.038173804       |       |
| 1.688883569                           | 2.151560452                                         | 1.75443129  |                   |       |
| ENSG00000136783                       | 623.6023432                                         | 513.530932  | 452.7206667       |       |
| 272.2406982                           | 391.1320275                                         | 295.3458714 | 529.951314        |       |
| 319.5728657                           | 0.728183407                                         | 0.001495859 | 0.014602294       |       |
| NIPSNAP3A                             | 9 104747688                                         | 104760122   | + 2585            |       |
| protein_coding                        | nipsnap homolog 3A [Source:HGNC                     |             |                   |       |
| Symbol;Acc:HGNC:23619]                | -                                                   | 539 554     | 463 271 428       |       |
| 301                                   | 11.40309994                                         | 9.448941828 | 8.297034566       |       |
| 5.068856074                           | 7.215091105                                         | 5.435656247 |                   |       |
| ENSG00000177707                       | 2035.095588                                         | 1478.48707  | 1868.572773       |       |
| 1188.416037                           | 1287.628567                                         | 1303.05421  | 1794.05181        |       |
| 1259.699605                           | 0.509605157                                         | 0.001499236 | 0.014625927       |       |
| NECTIN3 3                             | 111070071                                           | 111275563   | + 6184            |       |
| protein_coding                        | nectin cell adhesion molecule 3 [Source:HGNC        |             |                   |       |
| Symbol;Acc:HGNC:17664]                | -                                                   | 1759 1595   | 1911 1183 1409    |       |
| 1328                                  | 15.55575417                                         | 11.37169399 | 14.31507613       |       |
| 9.249462164                           | 9.928876527                                         | 10.02477491 |                   |       |
| ENSG00000173110                       | 75.20250892                                         | 30.58938765 | 104.6244305       |       |
| 171.782876                            | 107.8354655                                         | 310.0641042 | 70.1387757        |       |
| 196.5608152                           | -1.488014167                                        | 0.001505569 | 0.014669752       | HSPA6 |
| 1                                     | 161524540                                           | 161526910   | + 2371            |       |
| protein_coding                        | heat shock protein family A (Hsp70) member 6        |             |                   |       |
| [Source:HGNC Symbol;Acc:HGNC:5239]    | -                                                   | 65 33       | 107               |       |
| 171                                   | 118 316                                             | 1.499258485 | 0.61364379        |       |
| 2.090521698                           | 3.487111009                                         | 2.168747797 | 6.221592529       |       |
| ENSG00000138835                       | 2231.779072                                         | 2921.749996 | 2108.133385       |       |
| 2920.308891                           | 4047.485397                                         | 3546.112887 | 2420.554151       |       |
| 3504.635725                           | -0.5337862                                          | 0.001505648 | 0.014669752       | RGS3  |
| 9                                     | 113444731                                           | 113597743   | + 13793           |       |

|                        |                                            |                        |                                     |             |             |                |             |
|------------------------|--------------------------------------------|------------------------|-------------------------------------|-------------|-------------|----------------|-------------|
| protein_coding         | regulator of G protein signaling 3         | [Source:HGNC           |                                     |             |             |                |             |
| Symbol;Acc:HGNC:9999]  | -                                          | 1929                   | 3152                                | 2156        | 2907        | 4429           |             |
|                        | 3614                                       | 7.648357933            | 10.0753799                          | 7.240898773 |             |                |             |
| 10.19031273            |                                            | 13.99282948            | 12.23137969                         |             |             |                |             |
| ENSG00000220161        | 16.19746346                                | 3.707804563            |                                     | 16.62257307 |             | 0              |             |
|                        | 0                                          | 12.17594703            | 0                                   | 6.096675626 |             |                |             |
| 0.001511116            | 1                                          | LINC02076              | 17                                  | 18411159    |             |                |             |
| 18414380               | +                                          | 1871                   | lincRNA long intergenic non-protein |             |             |                |             |
| coding RNA 2076        | [Source:HGNC                               | Symbol;Acc:HGNC:52924] | -                                   |             |             | 14             |             |
|                        | 4                                          | 17                     | 0                                   | 0           | 0.409212565 |                |             |
| 0.094258421            |                                            | 0.420898705            | 0                                   | 0           | 0           |                |             |
| ENSG00000135966        | 1155.804714                                | 1313.489767            |                                     | 1280.915925 |             |                |             |
| 1796.185861            |                                            | 1834.116774            | 1555.226598                         | 1250.070135 |             |                |             |
| 1728.509744            |                                            | -0.46718661            | 0.001530607                         | 0.014903435 |             |                |             |
| TGFBRAP1               | 2                                          | 105264391              | 105330034                           | -           |             | 6005           |             |
| protein_coding         | transforming growth factor beta receptor   |                        |                                     |             |             |                |             |
| associated protein 1   | [Source:HGNC                               | Symbol;Acc:HGNC:16836] | -                                   |             |             |                |             |
|                        | 999                                        | 1417                   | 1310                                | 1788        | 2007        | 1585           | 9.098026327 |
|                        | 10.40377129                                |                        | 10.10556825                         |             | 14.39646014 |                | 14.56441209 |
|                        | 12.32146338                                |                        |                                     |             |             |                |             |
| ENSG00000170144        | 8728.118882                                | 8683.678287            |                                     | 9498.333815 |             |                |             |
| 7439.906312            |                                            | 5895.310069            | 6917.569412                         | 8970.043661 |             |                |             |
| 6750.928598            |                                            | 0.410107354            | 0.001552495                         | 0.01508995  |             |                |             |
| HNRNPA3                | 2                                          | 177212563              | 177223958                           | +           |             | 6033           |             |
| protein_coding         | heterogeneous nuclear ribonucleoprotein A3 |                        |                                     |             |             |                |             |
| [Source:HGNC           | Symbol;Acc:HGNC:24941]                     | -                      |                                     | 7544        | 9368        | 9714           |             |
|                        | 7406                                       | 6451                   | 7050                                | 68.38534892 | 68.46167409 |                |             |
| 74.58770245            |                                            | 59.35421956            | 46.59639459                         | 54.55088837 |             |                |             |
| ENSG00000104880        | 121.480976                                 | 196.5136419            |                                     | 121.2470036 |             |                |             |
| 343.5657519            |                                            | 200.1353132            | 338.5193542                         | 146.4138738 |             |                |             |
| 294.0734731            |                                            | -1.003422877           | 0.00155299                          | 0.01508995  |             |                |             |
| ARHGEF18               | 19                                         | 7395113                | 7472477                             | +           | 6235        | protein_coding |             |
| Rho/Rac                | guanine nucleotide exchange factor 18      | [Source:HGNC           |                                     |             |             |                |             |
| Symbol;Acc:HGNC:17090] | -                                          | 105                    | 212                                 | 124         | 342         | 219            |             |
|                        | 345                                        | 0.920974391            | 1.499109516                         | 0.921271599 |             |                |             |
| 2.652105919            |                                            | 1.530616021            | 2.583025378                         |             |             |                |             |
| ENSG00000174705        | 3297.340776                                | 3048.742302            |                                     | 2987.174161 |             |                |             |
| 5275.040244            |                                            | 3856.488683            | 3879.726164                         | 3111.085746 |             |                |             |
| 4337.08503             |                                            | -0.479332798           | 0.00155309                          | 0.01508995  |             |                |             |
| SH3PXD2B               | 5                                          | 172325000              | 172454523                           | -           |             | 8242           |             |
| protein_coding         | SH3 and PX domains 2B                      | [Source:HGNC           |                                     |             |             |                |             |
| Symbol;Acc:HGNC:29242] | -                                          | 2850                   | 3289                                | 3055        | 5251        | 4220           |             |
|                        | 3954                                       | 18.91067202            | 17.59402567                         | 17.1704256  |             |                |             |
| 30.80424895            |                                            | 22.31199678            | 22.39494966                         |             |             |                |             |
| ENSG00000085840        | 1266.873035                                | 997.3994276            |                                     | 1185.09168  |             |                |             |
| 762.4748705            |                                            | 712.8107044            | 888.9812606                         | 1149.788048 |             |                |             |
| 788.0889452            |                                            | 0.544605789            | 0.001553711                         | 0.01508995  |             | ORC1           |             |
|                        | 1                                          | 52372829               | 52404459                            | -           | 3157        |                |             |
| protein_coding         | origin recognition complex subunit 1       | [Source:HGNC           |                                     |             |             |                |             |
| Symbol;Acc:HGNC:8487]  | -                                          | 1095                   | 1076                                | 1212        | 759         | 780            |             |



|                                               |                                                  |             |                |        |
|-----------------------------------------------|--------------------------------------------------|-------------|----------------|--------|
| 906                                           | 18.96855508                                      | 15.02697789 | 17.78404275    |        |
| 11.62434285                                   | 10.76660099                                      | 13.39675613 |                |        |
| ENSG00000139926                               | 2265.330961                                      | 1607.333278 | 1777.637521    |        |
| 1215.539649                                   | 1247.418733                                      | 1448.274107 | 1883.43392     |        |
| 1303.744163                                   | 0.530173934                                      | 0.001554747 | 0.01509042     | FRMD6  |
| 14                                            | 51489100                                         | 51730727    | + 9416         |        |
| protein_coding                                | FERM domain containing 6 [Source:HGNC            |             |                |        |
| Symbol;Acc:HGNC:19839]                        | -                                                | 1958 1734   | 1818 1210      | 1365   |
| 1476                                          | 11.37210734                                      | 8.119262849 | 8.943960754    |        |
| 6.21326872                                    | 6.31720251                                       | 7.317554126 |                |        |
| ENSG00000174165                               | 476.6682104                                      | 525.5812969 | 554.411702     |        |
| 745.3970407                                   | 732.0017618                                      | 807.5403725 | 518.8870697    |        |
| 761.6463917                                   | -0.553012733                                     | 0.00155926  | 0.015119004    |        |
| ZDHHC24 11                                    | 66520637                                         | 66546238    | - 6266         |        |
| protein_coding                                | zinc finger DHHC-type containing 24 [Source:HGNC |             |                |        |
| Symbol;Acc:HGNC:27387]                        | -                                                | 412 567     | 567 742        | 801    |
| 823                                           | 3.595849762                                      | 3.989574931 | 4.191747598    |        |
| 5.7255173                                     | 5.570583947                                      | 6.131341142 |                |        |
| ENSG00000088832                               | 4779.408682                                      | 4753.40545  | 5242.955107    |        |
| 3482.872696                                   | 3833.642186                                      | 3937.61788  | 4925.256413    |        |
| 3751.377587                                   | 0.392772992                                      | 0.00155967  | 0.015119004    | FKBP1A |
| 20                                            | 1368978 1393172                                  | - 2577      | protein_coding | FK506  |
| binding protein                               | 1A [Source:HGNC Symbol;Acc:HGNC:3711]            |             |                | 4131   |
| 5128                                          | 5362 3467                                        | 4195 4013   | 87.6668676     |        |
| 87.73392437                                   | 96.38619739                                      | 65.04900226 | 70.93754336    |        |
| 72.69436998                                   |                                                  |             |                |        |
| ENSG00000105229                               | 542.6150259                                      | 932.5128477 | 808.6392902    |        |
| 1336.089035                                   | 1065.560617                                      | 1180.40227  | 761.2557213    |        |
| 1194.017307                                   | -0.647939065                                     | 0.001565979 | 0.015170548    | PIAS4  |
| 19                                            | 4007646 4039386                                  | + 3646      | protein_coding |        |
| protein inhibitor of activated                | STAT 4 [Source:HGNC                              |             |                |        |
| Symbol;Acc:HGNC:17002]                        | zf-MIZ                                           | 469 1006    | 827 1330       | 1166   |
| 1203                                          | 7.034786008                                      | 12.16508855 | 10.50730408    |        |
| 17.63746615                                   | 13.93607529                                      | 15.40263411 |                |        |
| ENSG00000115257                               | 37.02277362                                      | 63.03267758 | 51.82331606    |        |
| 128.5860124                                   | 116.0602044                                      | 120.6895089 | 50.62625575    |        |
| 121.7785752                                   | -1.261436797                                     | 0.001574024 | 0.015238825    | PCSK4  |
| 19                                            | 1481428 1490752                                  | - 3792      | protein_coding |        |
| proprotein convertase subtilisin/kexin type 4 | [Source:HGNC                                     |             |                |        |
| Symbol;Acc:HGNC:8746]                         | -                                                | 32 68       | 53 128         | 127    |
| 123                                           | 0.461504949                                      | 0.79063228  | 0.647455608    |        |
| 1.632085316                                   | 1.459466027                                      | 1.514198524 |                |        |
| ENSG00000135052                               | 2284.99931                                       | 2014.264829 | 2153.112112    |        |
| 1579.196965                                   | 1567.26969                                       | 1658.254228 | 2150.792084    |        |
| 1601.573628                                   | 0.425155757                                      | 0.001582295 | 0.015290881    | GOLM1  |
| 9                                             | 86026146                                         | 86100173    | - 4233         |        |
| protein_coding                                | golgi membrane protein 1 [Source:HGNC            |             |                |        |
| Symbol;Acc:HGNC:15451]                        | -                                                | 1975 2173   | 2202 1572      | 1715   |
| 1690                                          | 25.51605586                                      | 22.63317158 | 24.09747298    |        |
| 17.9558302                                    | 17.65527366                                      | 18.63736334 |                |        |

|                        |                                                 |             |             |        |
|------------------------|-------------------------------------------------|-------------|-------------|--------|
| ENSG00000177873        | 297.3391507                                     | 262.3271729 | 186.7594975 |        |
| 468.1334515            | 385.6488683                                     | 418.9790268 | 248.808607  |        |
| 424.2537822            | -0.771066542                                    | 0.001582639 | 0.015290881 | ZNF619 |
| 3                      | 40477113                                        | 40490236    | + 4514      |        |
| protein_coding         | zinc finger protein 619 [Source:HGNC            |             |             |        |
| Symbol;Acc:HGNC:26910] | zf-C2H2                                         | 257 283     | 191 466     | 422    |
| 427                    | 3.113624826                                     | 2.764132382 | 1.960082126 |        |
| 4.991436821            | 4.073891835                                     | 4.415830107 |             |        |
| ENSG00000143641        | 1576.938764                                     | 1712.078757 | 2145.289725 |        |
| 1272.800607            | 1219.089076                                     | 1341.321615 | 1811.435749 |        |
| 1277.7371              | 0.50389958                                      | 0.001583495 | 0.015290881 | GALNT2 |
| 1                      | 230057990                                       | 230282124   | + 7743      |        |
| protein_coding         | polypeptide N-acetylgalactosaminyltransferase 2 |             |             |        |
| [Source:HGNC           | Symbol;Acc:HGNC:4124]                           | -           | 1363 1847   | 2194   |
| 1267                   | 1334 1367                                       | 9.626785814 | 10.51699322 |        |
| 13.12592202            | 7.911677429                                     | 7.507669881 | 8.241481558 |        |
| ENSG00000102158        | 2493.252411                                     | 1800.139116 | 2691.87904  |        |
| 1646.503706            | 1487.76388                                      | 1694.559202 | 2328.423522 |        |
| 1609.608929            | 0.532479677                                     | 0.001583572 | 0.015290881 | MAGT1  |
| X                      | 77826364                                        | 77895593    | - 4862      |        |
| protein_coding         | magnesium transporter 1 [Source:HGNC            |             |             |        |
| Symbol;Acc:HGNC:28880] | -                                               | 2155 1942   | 2753 1639   | 1628   |
| 1727                   | 24.2396884                                      | 17.61035979 | 26.22972351 |        |
| 16.29915972            | 14.59143631                                     | 16.58148487 |             |        |
| ENSG00000258768        | 37.02277362                                     | 38.00499677 | 32.26734773 |        |
| 146.6684204            | 55.74545252                                     | 107.9337071 | 35.76503938 |        |
| 103.4491934            | -1.531332765                                    | 0.001584402 | 0.015290881 |        |
| AL356019.2             | 14 20260480                                     | 20264308    | -           | 3829   |
| lincRNA                | novel transcript                                |             |             | 33     |
| 146                    | 61 110                                          | 0.457045382 | 0.472098313 |        |
| 0.399237226            | 1.843608518                                     | 0.694229503 | 1.34107589  |        |
| ENSG00000062282        | 68.26073887                                     | 158.5086451 | 84.09066379 |        |
| 304.3872013            | 215.6709311                                     | 179.5624401 | 103.6200159 |        |
| 233.2068575            | -1.166025317                                    | 0.001585625 | 0.015293028 | DGAT2  |
| 11                     | 75759512                                        | 75801535    | + 7905      |        |
| protein_coding         | diacylglycerol 0-acyltransferase 2 [Source:HGNC |             |             |        |
| Symbol;Acc:HGNC:16940] | -                                               | 59 171      | 86 303      | 236    |
| 183                    | 0.408173542                                     | 0.95373604  | 0.503963441 |        |
| 1.853283976            | 1.300974327                                     | 1.080675365 |             |        |
| ENSG00000157306        | 1.156961676                                     | 1.853902282 | 2.933395248 |        |
| 36.16481599            | 4.569299387                                     | 37.28618974 | 1.981419735 |        |
| 26.00676837            | -3.699354562                                    | 0.001588517 | 0.015311258 | ZFH2-  |
| AS1 14                 | 23511760                                        | 23560778    | + 5097      |        |
| processed_transcript   | ZFH2 antisense RNA 1 [Source:HGNC               |             |             |        |
| Symbol;Acc:HGNC:52658] | -                                               | 1 2         | 3 36        | 5      |
| 38                     | 0.010729515                                     | 0.017300128 | 0.027265224 |        |
| 0.341498723            | 0.04274782                                      | 0.348028652 |             |        |
| ENSG00000174607        | 139.9923628                                     | 145.5313291 | 172.0925212 |        |
| 71.32505376            | 31.98509571                                     | 83.40331915 | 152.5387377 |        |
| 62.23782288            | 1.295876744                                     | 0.00159047  | 0.015317982 | UGT8   |

|                                                 |                                                   |             |      |             |                     |
|-------------------------------------------------|---------------------------------------------------|-------------|------|-------------|---------------------|
| 4                                               | 114598455                                         | 114678224   | +    | 4699        |                     |
| protein_coding                                  | UDP glycosyltransferase 8 [Source:HGNC            |             |      |             |                     |
| Symbol;Acc:HGNC:12555]                          | -                                                 | 121         | 157  | 176         | 71 35               |
| 85                                              | 1.408233392                                       | 1.473086215 |      | 1.735040747 |                     |
| 0.730557023                                     | 0.324579582                                       | 0.844421955 |      |             |                     |
| ENSG00000127337                                 | 925.5693406                                       | 824.0595642 |      | 709.8816501 |                     |
| 550.5088657                                     | 596.7505                                          | 493.5514063 |      | 819.8368516 |                     |
| 546.936924                                      | 0.583201489                                       | 0.001591998 |      | 0.015317982 | YEATS4              |
| 12                                              | 69359703                                          | 69390796    | +    | 1714        |                     |
| protein_coding                                  | YEATS domain containing 4 [Source:HGNC            |             |      |             |                     |
| Symbol;Acc:HGNC:24859]                          | Others                                            | 800         | 889  | 726         | 548 653             |
| 503                                             | 25.52547791                                       | 22.86782718 |      | 19.62132173 |                     |
| 15.45862839                                     | 16.6020211                                        | 13.69945226 |      |             |                     |
| ENSG00000068885                                 | 429.2327817                                       | 363.3648472 |      | 376.4523902 |                     |
| 173.7920324                                     | 268.674804                                        | 238.4353712 |      | 389.6833397 |                     |
| 226.9674025                                     | 0.778350119                                       | 0.001592727 |      | 0.015317982 | IFT80               |
| 3                                               | 160256986                                         | 160399880   | -    | 7175        |                     |
| protein_coding                                  | intraflagellar transport 80 [Source:HGNC          |             |      |             |                     |
| Symbol;Acc:HGNC:29262]                          | -                                                 | 371         | 392  | 385         | 173 294             |
| 243                                             | 2.827787152                                       | 2.408785452 |      | 2.485657461 |                     |
| 1.165803659                                     | 1.785599365                                       | 1.580994664 |      |             |                     |
| ENSG00000165271                                 | 3113.383869                                       | 3971.985639 |      | 3690.211223 |                     |
| 5633.674669                                     | 4336.265118                                       | 4914.908537 |      | 3591.860243 |                     |
| 4961.616108                                     | -0.465758124                                      | 0.00159333  |      | 0.015317982 | NOL6                |
| 9                                               | 33461441                                          | 33473930    | -    | 5906        |                     |
| protein_coding                                  | nucleolar protein 6 [Source:HGNC                  |             |      |             |                     |
| Symbol;Acc:HGNC:19910]                          | -                                                 | 2691        | 4285 | 3774        | 5608 4745           |
| 5009                                            | 24.9181025                                        | 31.98831335 |      | 29.60130849 |                     |
| 45.91089708                                     | 35.01074658                                       | 39.59165213 |      |             |                     |
| ENSG00000164187                                 | 679.1365036                                       | 691.5055511 |      | 703.0370612 |                     |
| 497.2662199                                     | 466.0685375                                       | 449.3967079 |      | 691.226372  |                     |
| 470.9104884                                     | 0.553895547                                       | 0.001594433 |      | 0.015317982 | LMBRD2              |
| 5                                               | 36098412                                          | 36151961    | -    | 8421        |                     |
| protein_coding                                  | LMBR1 domain containing 2 [Source:HGNC            |             |      |             |                     |
| Symbol;Acc:HGNC:25287]                          | -                                                 | 587         | 746  | 719         | 495 510             |
| 458                                             | 3.812142677                                       | 3.905792059 |      | 3.955192985 |                     |
| 2.842122207                                     | 2.63915627                                        | 2.538913159 |      |             |                     |
| ENSG00000174282                                 | 1159.275599                                       | 1456.240242 |      | 1652.479323 |                     |
| 2009.156444                                     | 1839.599933                                       | 2328.424428 |      | 1422.665055 |                     |
| 2059.060268                                     | -0.53275375                                       | 0.001595226 |      | 0.015317982 | ZBTB4               |
| 17                                              | 7459366                                           | 7484263     | -    | 6126        | protein_coding zinc |
| finger and BTB domain containing 4 [Source:HGNC | Symbol;Acc:HGNC:23847]                            |             |      |             |                     |
| ZBTB                                            | 1002                                              | 1571        | 1690 | 2000        | 2013 2373           |
| 8.945104979                                     | 11.30662922                                       | 12.77945014 |      | 15.78535014 |                     |
| 14.31941844                                     | 18.08284591                                       |             |      |             |                     |
| ENSG00000176788                                 | 1642.88558                                        | 2224.682738 |      | 1797.193489 |                     |
| 2289.433768                                     | 3147.333418                                       | 2720.910635 |      | 1888.253935 |                     |
| 2719.22594                                      | -0.525861328                                      | 0.001607009 |      | 0.015421436 | BASP1               |
| 5                                               | 17065598                                          | 17276843    | +    | 2217        |                     |
| protein_coding                                  | brain abundant membrane attached signal protein 1 |             |      |             |                     |

|                                         |                                                        |             |                |        |
|-----------------------------------------|--------------------------------------------------------|-------------|----------------|--------|
| [Source:HGNC Symbol;Acc:HGNC:957]       | -                                                      | 1420        | 2400           | 1838   |
| 2279                                    | 3444 2773                                              | 35.02816316 | 47.72868912    |        |
| 38.40451366                             | 49.70268478                                            | 67.69491502 | 58.38888907    |        |
| ENSG00000164366                         | 455.8429002                                            | 477.3798375 | 478.1434255    |        |
| 724.3008981                             | 725.6047427                                            | 634.8464411 | 470.4553878    |        |
| 694.9173606                             | -0.562569895                                           | 0.001609167 | 0.015432457    |        |
| CCDC127                                 | 5 196871 218215                                        | - 9701      | protein_coding |        |
| coiled-coil domain containing 127       | [Source:HGNC Symbol;Acc:HGNC:30520]                    |             |                |        |
| -                                       | 394 515                                                | 489 721     | 794 647        |        |
| 2.221132312                             | 2.340586428                                            | 2.335042612 | 3.593519258    |        |
| 3.566667263                             | 3.113392049                                            |             |                |        |
| ENSG00000115295                         | 475.5112487                                            | 368.9265541 | 285.5171375    |        |
| 641.9254839                             | 515.4169709                                            | 725.1182689 | 376.6516468    |        |
| 627.4869079                             | -0.737633776                                           | 0.001610624 | 0.015436747    | CLIP4  |
| 2                                       | 29097705                                               | 29189643    | + 7775         |        |
| protein_coding                          | CAP-Gly domain containing linker protein family member |             |                |        |
| 4 [Source:HGNC Symbol;Acc:HGNC:26108]   | -                                                      | 411         | 398            | 292    |
| 639                                     | 564 739                                                | 2.890920421 | 2.256922428    |        |
| 1.739742246                             | 3.973760395                                            | 3.161093225 | 4.437006618    |        |
| ENSG00000159199                         | 1139.607251                                            | 1283.82733  | 1672.035292    |        |
| 895.0791958                             | 838.0095076                                            | 1023.407787 | 1365.156624    |        |
| 918.8321634                             | 0.57170613                                             | 0.001614522 | 0.015464406    |        |
| ATP5MC1                                 | 17 48892765                                            | 48895871    | + 2615         |        |
| protein_coding                          | ATP synthase membrane subunit c locus 1 [Source:HGNC   |             |                |        |
| Symbol;Acc:HGNC:841]                    | -                                                      | 985 1385    | 1710 891       | 917    |
| 1043                                    | 20.59962194                                            | 23.35135241 | 30.29192501    |        |
| 16.47430975                             | 15.28115709                                            | 18.61909857 |                |        |
| ENSG00000160256                         | 319.3214225                                            | 632.1806781 | 608.1906149    |        |
| 834.8045025                             | 806.0244119                                            | 996.9149678 | 519.8975718    |        |
| 879.2479607                             | -0.756224972                                           | 0.001625016 | 0.015543835    |        |
| FAM207A                                 | 21 44940010                                            | 44976989    | + 1402         |        |
| protein_coding                          | family with sequence similarity 207 member A           |             |                |        |
| [Source:HGNC Symbol;Acc:HGNC:15811]     | -                                                      | 276         | 682            | 622    |
| 831                                     | 882 1016                                               | 10.76603485 | 21.44718604    |        |
| 20.55156159                             | 28.65855089                                            | 27.41442677 | 33.8292002     |        |
| ENSG00000133789                         | 1906.672842                                            | 1881.710816 | 2003.508955    |        |
| 1337.093614                             | 1537.112314                                            | 1407.063055 | 1930.630871    |        |
| 1427.089661                             | 0.435850808                                            | 0.00162639  | 0.015543835    | SWAP70 |
| 11                                      | 9664077 9752991                                        | + 7190      | protein_coding |        |
| switching B cell complex subunit SWAP70 | [Source:HGNC                                           |             |                |        |
| Symbol;Acc:HGNC:17070]                  | -                                                      | 1648 2030   | 2049 1331      | 1682   |
| 1434                                    | 12.53496223                                            | 12.44804374 | 13.20126423    |        |
| 8.950563573                             | 10.19425983                                            | 9.310356201 |                |        |
| ENSG00000136950                         | 1369.842624                                            | 1597.136816 | 1273.093538    |        |
| 1958.927533                             | 2114.671756                                            | 1816.229927 | 1413.357659    |        |
| 1963.276405                             | -0.473964669                                           | 0.001626408 | 0.015543835    | ARPC5L |
| 9                                       | 124862130                                              | 124877733   | + 3610         |        |
| protein_coding                          | actin related protein 2/3 complex subunit 5 like       |             |                |        |
| [Source:HGNC Symbol;Acc:HGNC:23366]     | -                                                      | 1184        | 1723           | 1302   |
| 1950                                    | 2314 1851                                              | 17.93656242 | 21.04321215    |        |

|                        |                                                   |             |                  |       |
|------------------------|---------------------------------------------------|-------------|------------------|-------|
| 16.70729874            | 26.11732094                                       | 27.93281792 | 23.93565148      |       |
| ENSG00000151466        | 313.5366141                                       | 280.8661957 | 351.0296314      |       |
| 191.8744404            | 189.1689946                                       | 172.6939314 | 315.1441471      |       |
| 184.5791222            | 0.77155789                                        | 0.001626881 | 0.015543835      | SCLT1 |
| 4                      | 128864921                                         | 129093607   | - 8292           |       |
| protein_coding         | sodium channel and clathrin linker 1 [Source:HGNC |             |                  |       |
| Symbol;Acc:HGNC:26406] | -                                                 | 271 303     | 359 191          | 207   |
| 176                    | 1.787329857                                       | 1.611080693 | 2.005569013      |       |
| 1.113718132            | 1.087851587                                       | 0.990830599 |                  |       |
| ENSG00000115419        | 5982.648825                                       | 4244.509274 | 4581.963378      |       |
| 3599.40377             | 3543.948605                                       | 3566.718413 | 4936.373826      |       |
| 3570.023596            | 0.467246084                                       | 0.00162912  | 0.015555498      | GLS   |
| 2                      | 190880827                                         | 190965552   | + 9827           |       |
| protein_coding         | glutaminase [Source:HGNC Symbol;Acc:HGNC:4331]    |             |                  | -     |
| 5171                   | 4579 4686                                         | 3583 3878   | 3635 28.77718405 |       |
| 20.54393562            | 22.0893931                                        | 17.62897527 | 17.19671312      |       |
| 17.2675012             |                                                   |             |                  |       |
| ENSG00000154832        | 1660.240005                                       | 2073.589702 | 1850.972402      |       |
| 2598.84386             | 2347.706025                                       | 2696.380248 | 1861.600703      |       |
| 2547.643378            | -0.452111366                                      | 0.001630732 | 0.015561178      | CXXC1 |
| 18                     | 50282343                                          | 50288304    | - 4319           |       |
| protein_coding         | CXXC finger protein 1 [Source:HGNC                |             |                  |       |
| Symbol;Acc:HGNC:24343] | -                                                 | 1435 2237   | 1893 2587        | 2569  |
| 2748                   | 18.17035489                                       | 22.83582667 | 20.30345119      |       |
| 28.96105919            | 25.92026862                                       | 29.70158052 |                  |       |
| ENSG00000155324        | 369.0707746                                       | 335.556313  | 442.9426825      |       |
| 238.0850386            | 234.8619885                                       | 220.7734919 | 382.5232567      |       |
| 231.240173             | 0.72613395                                        | 0.001646855 | 0.01570522       |       |
| GRAMD2B 5              | 126360132                                         | 126496494   | + 5051           |       |
| protein_coding         | GRAM domain containing 2B [Source:HGNC            |             |                  |       |
| Symbol;Acc:HGNC:24911] | -                                                 | 319 362     | 453 237          | 257   |
| 225                    | 3.453886225                                       | 3.159840491 | 4.154543296      |       |
| 2.268674523            | 2.217248412                                       | 2.079462943 |                  |       |
| ENSG00000122870        | 757.8098976                                       | 609.0068995 | 795.9279108      |       |
| 534.4356141            | 468.8101171                                       | 385.6176992 | 720.9149026      |       |
| 462.9544768            | 0.638665326                                       | 0.001659598 | 0.015816881      | BICC1 |
| 10                     | 58513140                                          | 58831437    | + 6569           |       |
| protein_coding         | BicC family RNA binding protein 1 [Source:HGNC    |             |                  |       |
| Symbol;Acc:HGNC:19351] | -                                                 | 655 657     | 814 532          | 513   |
| 393                    | 5.453015735                                       | 4.409608831 | 5.740207593      |       |
| 3.91573765             | 3.403115593                                       | 2.792796711 |                  |       |
| ENSG00000124766        | 736.9845874                                       | 994.6185741 | 880.0185745      |       |
| 1250.699886            | 1620.273563                                       | 1087.186796 | 870.5405787      |       |
| 1319.386748            | -0.599392313                                      | 0.00166212  | 0.015831046      | SOX4  |
| 6                      | 21592768                                          | 21598619    | + 5852           |       |
| protein_coding         | SRY-box 4 [Source:HGNC Symbol;Acc:HGNC:11200]     |             |                  | HMG   |
| 637                    | 1073 900                                          | 1245 1773   | 1108 5.952917004 |       |
| 8.084056915            | 7.124274553                                       | 10.28646732 | 13.20270793      |       |
| 8.838559274            |                                                   |             |                  |       |
| ENSG00000100056        | 614.3466498                                       | 926.9511408 | 742.1489979      |       |

|                                        |                                                      |              |             |                    |
|----------------------------------------|------------------------------------------------------|--------------|-------------|--------------------|
| 1182.388567                            | 1054.594299                                          | 1178.439839  | 761.1489295 |                    |
| 1138.474235                            | -0.579586682                                         | 0.001663358  | 0.015832975 | ESS2               |
| 22                                     | 19130279                                             | 19144684     | - 6003      |                    |
| protein_coding                         | ess-2 splicing factor homolog                        | [Source:HGNC |             |                    |
| Symbol;Acc:HGNC:16817]                 | -                                                    | 531 1000     | 759 1177    | 1154               |
| 1201                                   | 4.837499025                                          | 7.344557151  | 5.857008959 |                    |
| 9.480021799                            | 8.377145588                                          | 9.339437065  |             |                    |
| ENSG00000273391                        | 10.41265508                                          | 10.19646255  | 13.68917783 | 0                  |
| 0                                      | 0                                                    | 11.43276515  | 0           | 6.008272667        |
| 0.001666877                            | 1                                                    | AC083880.1   | 7           | 139359032          |
| 139359566                              | -                                                    | 535          | antisense   | "novel transcript, |
| antisense to LUC7L2"                   | -                                                    | 9            | 11          | 14 0 0             |
| 0                                      | 0.919990706                                          | 0.906510546  | 1.212206782 | 0                  |
| 0                                      | 0                                                    |              |             |                    |
| ENSG00000128944                        | 1007.71362                                           | 1088.240639  | 1125.445977 |                    |
| 821.7449856                            | 749.3650995                                          | 704.512743   | 1073.800079 |                    |
| 758.5409427                            | 0.501807548                                          | 0.001667957  | 0.015863472 | KNSTRN             |
| 15                                     | 40382721                                             | 40394246     | + 3654      |                    |
| protein_coding                         | kinetochore localized astrin (SPAG5) binding protein | [Source:HGNC |             |                    |
| Symbol;Acc:HGNC:30767]                 | -                                                    | 871          | 1174        | 1151               |
| 818                                    | 820 718                                              | 13.03599919  | 14.1655523  |                    |
| 14.59181236                            | 10.82395498                                          | 9.779213035  | 9.172800267 |                    |
| ENSG00000114841                        | 323.9492692                                          | 359.6570426  | 278.6725486 |                    |
| 621.8339194                            | 401.1844862                                          | 574.0110789  | 320.7596202 |                    |
| 532.3431615                            | -0.730209084                                         | 0.001668974  | 0.015863472 | DNAH1              |
| 3                                      | 52316319                                             | 52400491     | + 13872     |                    |
| protein_coding                         | dynein axonemal heavy chain 1                        | [Source:HGNC |             |                    |
| Symbol;Acc:HGNC:2940]                  | -                                                    | 280 388      | 285 619     | 439                |
| 585                                    | 1.103859155                                          | 1.233180371  | 0.951717896 |                    |
| 2.157509841                            | 1.379062782                                          | 1.96862421   |             |                    |
| ENSG00000231574                        | 34.70885027                                          | 25.95463194  | 42.04533189 | 0                  |
| 0                                      | 8.830939675                                          | 34.23627137  | 2.943646558 |                    |
| 3.546538426                            | 0.001670433                                          | 0.015863472  | LINC02015   | 3                  |
| 177816865                              | 177899224                                            | +            | 3005        | lincRNA long       |
| intergenic non-protein coding RNA 2015 | [Source:HGNC                                         |              |             |                    |
| Symbol;Acc:HGNC:52850]                 | -                                                    | 30 28        | 43 0        | 0                  |
| 9                                      | 0.545973409                                          | 0.410816154  | 0.662867055 | 0                  |
| 0                                      | 0.139811878                                          |              |             |                    |
| ENSG00000177508                        | 2033.938626                                          | 1960.501663  | 3050.731058 |                    |
| 1581.206121                            | 1637.6369                                            | 1568.963616  | 2348.390449 |                    |
| 1595.935546                            | 0.557384335                                          | 0.001671746  | 0.015863472 | IRX3               |
| 16                                     | 54283304                                             | 54286763     | - 2911      |                    |
| protein_coding                         | iroquois homeobox 3                                  | [Source:HGNC |             |                    |
| Symbol;Acc:HGNC:14360]                 | Homeobox                                             | 1758 2115    | 3120 1574   |                    |
| 1792                                   | 1599 33.02717123                                     | 32.03333269  | 49.64949601 |                    |
| 26.14350061                            | 26.82590595                                          | 25.64202352  |             |                    |
| ENSG00000251127                        | 28.92404189                                          | 52.83621503  | 29.33395248 |                    |
| 80.36625776                            | 101.4384464                                          | 124.614371   | 37.03140314 |                    |
| 102.1396917                            | -1.459085294                                         | 0.001671751  | 0.015863472 |                    |
| AC091173.1                             | 8                                                    | 61759094     | 61765969    | - 2750             |

|                                  |                                     |                 |              |           |    |
|----------------------------------|-------------------------------------|-----------------|--------------|-----------|----|
|                                  | lincRNA novel transcript            | -               | 25           | 57        | 30 |
| 80                               | 111 127                             | 0.497166695     | 0.913852533  |           |    |
| 0.505348542                      | 1.4065608                           | 1.758931322     | 2.155842667  |           |    |
| ENSG00000260917                  | 212.8809483                         | 228.9569318     | 228.8048294  |           |    |
| 482.1975466                      | 297.91832                           | 378.7491905     | 223.5475698  |           |    |
| 386.2883524                      | -0.788048774                        | 0.001675419     | 0.015888415  |           |    |
| AL158212.3                       | 10 112823490                        | 112827726       | +            | 4237      |    |
|                                  | sense_overlapping                   | uncharacterized | LOC103344931 |           |    |
| [Source:NCBI gene;Acc:103344931] | -                                   | 184             | 247          | 234       |    |
| 480                              | 326 386                             | 2.374947818     | 2.570232715  |           |    |
| 2.558349355                      | 5.477520226                         | 3.352877866     | 4.25279919   |           |    |
| ENSG00000182197                  | 1410.336283                         | 1778.819239     | 1699.413647  |           |    |
| 1987.055723                      | 2267.286356                         | 2698.342679     | 1629.523056  |           |    |
| 2317.561586                      | -0.507731671                        | 0.00168648      | 0.015983393  | EXT1      |    |
| 8                                | 117794490                           | 118111853       | - 8325       |           |    |
| protein_coding                   | exostosin glycosyltransferase 1     | [Source:HGNC    |              |           |    |
| Symbol;Acc:HGNC:3512]            | -                                   | 1219 1919       | 1738 1978    | 2481      |    |
| 2750                             | 8.007817671                         | 10.1630647      | 9.670924343  |           |    |
| 11.48796917                      | 12.98676912                         | 15.4203591      |              |           |    |
| ENSG00000142871                  | 2332.434738                         | 3868.167111     | 4385.425896  |           |    |
| 2056.37162                       | 2179.555808                         | 2622.789084     | 3528.675915  |           |    |
| 2286.238837                      | 0.626468478                         | 0.001691877     | 0.016024614  | CYR61     |    |
| 1                                | 85580761                            | 85583962        | + 2455       |           |    |
| protein_coding                   | cysteine rich angiogenic inducer 61 | [Source:HGNC    |              |           |    |
| Symbol;Acc:HGNC:2654]            | -                                   | 2016 4173       | 4485 2047    | 2385      |    |
| 2673                             | 44.90903717                         | 74.94296068     | 84.62786931  |           |    |
| 40.31508341                      | 42.33460234                         | 50.82688547     |              |           |    |
| ENSG00000152240                  | 904.7440304                         | 916.7546783     | 759.7493694  |           |    |
| 460.0968257                      | 673.5147297                         | 553.405553      | 860.416026   |           |    |
| 562.3390361                      | 0.612932266                         | 0.001694408     | 0.016030945  | HAUS1     |    |
| 18                               | 46104332                            | 46128333        | + 2165       |           |    |
| protein_coding                   | HAUS augmin like complex subunit 1  | [Source:HGNC    |              |           |    |
| Symbol;Acc:HGNC:25174]           | -                                   | 782 989         | 777 458      | 737       |    |
| 564                              | 19.75347764                         | 20.14059743     | 16.62515006  |           |    |
| 10.22842568                      | 14.8343385                          | 12.16094261     |              |           |    |
| ENSG00000167005                  | 7364.061066                         | 6581.3531       | 6997.125466  |           |    |
| 5166.545796                      | 5626.635265                         | 5391.779279     | 6980.846544  |           |    |
| 5394.98678                       | 0.371661272                         | 0.001694643     | 0.016030945  | NUDT21    |    |
| 16                               | 56429133                            | 56452199        | - 5954       |           |    |
| protein_coding                   | nudix hydrolase 21                  | [Source:HGNC    |              |           |    |
| Symbol;Acc:HGNC:13870]           | -                                   | 6365 7100       | 7156 5143    | 6157 5495 |    |
| 58.46342986                      | 52.57550785                         | 55.67547839     | 41.76465618  |           |    |
| 45.06287758                      | 43.08289736                         |                 |              |           |    |
| ENSG00000163918                  | 1672.966583                         | 1446.970731     | 1176.291495  |           |    |
| 904.1203998                      | 1145.980286                         | 801.6530794     | 1432.07627   |           |    |
| 950.5845885                      | 0.590535953                         | 0.001718347     | 0.016245128  | RFC4      |    |
| 3                                | 186789880                           | 186807058       | - 2997       |           |    |
| protein_coding                   | replication factor C subunit 4      | [Source:HGNC    |              |           |    |
| Symbol;Acc:HGNC:9972]            | -                                   | 1446 1561       | 1203 900     | 1254      |    |
| 817                              | 26.38616432                         | 22.96413642     | 18.59436451  |           |    |

|                                        |                                                     |                      |                     |             |             |      |
|----------------------------------------|-----------------------------------------------------|----------------------|---------------------|-------------|-------------|------|
| 14.51967793                            | 18.23347271                                         | 12.72569029          |                     |             |             |      |
| ENSG00000158545                        | 3767.067216                                         | 4620.851437          | 4600.541548         |             |             |      |
| 6664.371925                            | 5168.791467                                         | 5914.767151          | 4329.486734         |             |             |      |
| 5915.976848                            | -0.450159041                                        | 0.00172638           | 0.016310986         | ZC3H18      |             |      |
| 16                                     | 88570381                                            | 88631966             | +                   | 8648        |             |      |
| protein_coding                         | zinc finger CCH-type containing 18 [Source:HGNC     |                      |                     |             |             |      |
| Symbol;Acc:HGNC:25091]                 | -                                                   | 3256                 | 4985                | 4705        | 6634        | 5656 |
| 6028                                   | 20.59033573                                         | 25.41460942          | 25.20266128         |             |             |      |
| 37.09035608                            | 28.5004894                                          | 32.53895479          |                     |             |             |      |
| ENSG00000112759                        | 2099.885441                                         | 2130.133722          | 2571.609835         |             |             |      |
| 1731.892855                            | 1574.580569                                         | 1670.028814          | 2267.209666         |             |             |      |
| 1658.834079                            | 0.450978206                                         | 0.001731917          | 0.016353192         |             |             |      |
| SLC29A1                                | 6                                                   | 44219505             | 44234151            | +           | 4408        |      |
| protein_coding                         | solute carrier family 29 member 1 (Augustine blood  |                      |                     |             |             |      |
| group) [Source:HGNC                    | Symbol;Acc:HGNC:11003]                              | -                    | 1815                | 2298        |             |      |
| 2630                                   | 1724                                                | 1723                 | 1702                | 22.51799697 | 22.98488824 |      |
| 27.63863677                            | 18.91023353                                         | 17.03343703          | 18.02453235         |             |             |      |
| ENSG00000187446                        | 1390.667934                                         | 1114.195271          | 1023.754942         |             |             |      |
| 768.5023398                            | 894.66882                                           | 739.8365017          | 1176.206049         |             |             |      |
| 801.0025538                            | 0.553383412                                         | 0.001750089          | 0.016513318         | CHP1        |             |      |
| 15                                     | 41230839                                            | 41281890             | +                   | 3950        |             |      |
| protein_coding                         | calcineurin like EF-hand protein 1 [Source:HGNC     |                      |                     |             |             |      |
| Symbol;Acc:HGNC:17433]                 | -                                                   | 1202                 | 1202                | 1047        | 765         | 979  |
| 754                                    | 16.64186845                                         | 13.41656472          | 12.2786902          |             |             |      |
| 9.364089502                            | 10.80050827                                         | 8.910873657          |                     |             |             |      |
| ENSG00000070614                        | 2743.156133                                         | 2872.621585          | 4462.671971         |             |             |      |
| 2420.028937                            | 1973.937335                                         | 2356.879678          | 3359.48323          |             |             |      |
| 2250.281983                            | 0.578368608                                         | 0.001751036          | 0.016513318         | NDST1       |             |      |
| 5                                      | 150485818                                           | 150558211            | +                   | 9529        |             |      |
| protein_coding                         | N-deacetylase and N-sulfotransferase 1 [Source:HGNC |                      |                     |             |             |      |
| Symbol;Acc:HGNC:7680]                  | -                                                   | 2371                 | 3099                | 4564        | 2409        | 2160 |
| 2402                                   | 13.6075187                                          | 14.33864813          | 22.18711143         |             |             |      |
| 12.22336244                            | 9.877909023                                         | 11.76716144          |                     |             |             |      |
| ENSG00000229029                        | 32.39492692                                         | 3.707804563          | 2.933395248         | 0           |             |      |
| 0                                      | 0                                                   | 13.01204224          | 0                   | 6.188633012 |             |      |
| 0.001754162                            | 1                                                   | CDCA4P1              | 9                   | 14593577    | 14594200    |      |
| +                                      | 624                                                 | processed_pseudogene | cell division cycle |             |             |      |
| associated 4 pseudogene 1 [Source:HGNC | Symbol;Acc:HGNC:49770]                              | -                    |                     |             |             |      |
| 28                                     | 4                                                   | 3                    | 0                   | 0           | 2.453963814 |      |
| 0.282624209                            | 0.222709694                                         | 0                    | 0                   | 0           |             |      |
| ENSG00000063176                        | 469.7264403                                         | 570.0749516          | 673.7031087         |             |             |      |
| 886.0379918                            | 825.2154693                                         | 858.5635795          | 571.1681669         |             |             |      |
| 856.6056802                            | -0.583599487                                        | 0.001766918          | 0.016645561         | SPHK2       |             |      |
| 19                                     | 48619291                                            | 48630717             | +                   | 6009        |             |      |
| protein_coding                         | sphingosine kinase 2 [Source:HGNC                   |                      |                     |             |             |      |
| Symbol;Acc:HGNC:18859]                 | -                                                   | 406                  | 615                 | 689         | 882         | 903  |
| 875                                    | 3.69503488                                          | 4.512392511          | 5.311527981         |             |             |      |
| 7.096882218                            | 6.548534864                                         | 6.797541768          |                     |             |             |      |
| ENSG00000133398                        | 910.5288388                                         | 1232.845017          | 1014.954756         |             |             |      |
| 1389.331681                            | 1732.678328                                         | 1449.255322          | 1052.776204         |             |             |      |



|                                                                                             |                 |             |                 |        |
|---------------------------------------------------------------------------------------------|-----------------|-------------|-----------------|--------|
| 1523.75511                                                                                  | -0.532893466    | 0.001768007 | 0.016645561     | MED10  |
| 5                                                                                           | 6371881 6378594 | - 1880      | protein_coding  |        |
| mediator complex subunit 10 [Source:HGNC Symbol;Acc:HGNC:28760]                             | -               |             |                 |        |
| 787                                                                                         | 1330 1038       | 1383 1896   | 1477 22.8934685 |        |
| 31.19088875                                                                                 | 25.57654986     | 35.56849975 | 43.94799652     |        |
| 36.67487834                                                                                 |                 |             |                 |        |
| ENSG00000163376                                                                             | 252.2176453     | 271.5966843 | 206.3154658     |        |
| 406.8541799                                                                                 | 460.5853782     | 348.3315094 | 243.3765985     |        |
| 405.2570225                                                                                 | -0.735947037    | 0.001769719 | 0.016645561     | KBTBD8 |
| 3                                                                                           | 66998307        | 67011210    | + 4736          |        |
| protein_coding kelch repeat and BTB domain containing 8 [Source:HGNC Symbol;Acc:HGNC:30691] | -               | 218 293     | 211 405         | 504    |
| 355                                                                                         | 2.517326297     | 2.727657799 | 2.063826656     |        |
| 4.134705159                                                                                 | 4.637430783     | 3.499151089 |                 |        |
| ENSG00000116885                                                                             | 197.8404465     | 201.1483976 | 133.958383      |        |
| 344.5703302                                                                                 | 284.2104219     | 318.8950438 | 177.6490757     |        |
| 315.891932                                                                                  | -0.830819484    | 0.001769825 | 0.016645561     | OSCP1  |
| 1                                                                                           | 36415827        | 36450451    | - 2788          |        |
| protein_coding organic solute carrier partner 1 [Source:HGNC Symbol;Acc:HGNC:29971]         | -               | 171 217     | 137 343         | 311    |
| 325                                                                                         | 3.354270276     | 3.431633686 | 2.276303958     |        |
| 5.948432902                                                                                 | 4.861006674     | 5.441725459 |                 |        |
| ENSG00000253710                                                                             | 200.1543699     | 260.4732706 | 255.2053866     |        |
| 432.9732137                                                                                 | 422.2032634     | 339.5005697 | 238.611009      |        |
| 398.2256823                                                                                 | -0.737354025    | 0.001771446 | 0.016645561     | ALG11  |
| 13                                                                                          | 52012398        | 52032171    | + 10335         |        |
| protein_coding "ALG11, alpha-1,2-mannosyltransferase [Source:HGNC Symbol;Acc:HGNC:32456]"   | -               | 173 281     | 261 431         | 462    |
| 346                                                                                         | 0.915440948     | 1.198753248 | 1.169856203     |        |
| 2.016359685                                                                                 | 1.948005112     | 1.562829692 |                 |        |
| ENSG00000185624                                                                             | 10357.12092     | 9732.060028 | 12698.66803     |        |
| 7325.384395                                                                                 | 6701.334481     | 9383.364013 | 10929.28299     |        |
| 7803.360963                                                                                 | 0.486069215     | 0.001771592 | 0.016645561     | P4HB   |
| 17                                                                                          | 81843159        | 81860694    | - 5303          |        |
| protein_coding prolyl 4-hydroxylase subunit beta [Source:HGNC Symbol;Acc:HGNC:8548]         | -               | 8952 10499  | 12987 7292      | 7333   |
| 9563                                                                                        | 92.31943951     | 87.28915042 | 113.4461258     |        |
| 66.48539439                                                                                 | 60.25854703     | 84.18186915 |                 |        |
| ENSG00000124216                                                                             | 86.77212568     | 63.03267758 | 109.5134226     |        |
| 14.06409511                                                                                 | 44.77913399     | 17.66187935 | 86.43940862     |        |
| 25.50170282                                                                                 | 1.755908354     | 0.001775771 | 0.016674574     | SNAI1  |
| 20                                                                                          | 49982999        | 49988886    | + 1686          |        |
| protein_coding snail family transcriptional repressor 1 [Source:HGNC Symbol;Acc:HGNC:11128] | zf-C2H2         | 75 68       | 112 14          | 49     |
| 18                                                                                          | 2.432755179     | 1.778219221 | 3.077250906     |        |
| 0.40148718                                                                                  | 1.266476418     | 0.498380419 |                 |        |
| ENSG00000163900                                                                             | 698.8048521     | 656.2814077 | 651.2137452     |        |
| 842.8411283                                                                                 | 1012.556744     | 1031.257511 | 668.7666683     |        |
| 962.2184611                                                                                 | -0.525333382    | 0.00177824  | 0.016687506     |        |
| TMEM41A 3                                                                                   | 185476496       | 185499057   | - 8668          |        |

|                                           |                                    |                                             |             |                        |                |        |
|-------------------------------------------|------------------------------------|---------------------------------------------|-------------|------------------------|----------------|--------|
| protein_coding                            | transmembrane protein 41A          | [Source:HGNC                                |             |                        |                |        |
| Symbol;Acc:HGNC:30544]                    | -                                  | 604                                         | 708         | 666                    | 839            | 1108   |
| 1051                                      | 3.810770097                        | 3.601208885                                 |             | 3.55924417             |                |        |
| 4.679982991                               | 5.570311157                        | 5.660174875                                 |             |                        |                |        |
| ENSG00000269044                           | 107.5974358                        | 143.6774268                                 |             | 132.9805846            |                |        |
| 221.0072088                               | 275.985683                         | 218.8110608                                 |             | 128.0851491            |                |        |
| 238.6013176                               | -0.895812769                       | 0.001782488                                 |             | 0.016717109            |                |        |
| AC024075.2                                | 19                                 | 16633797                                    | 16635269    | -                      |                | 1473   |
|                                           | sense_intronic                     | "novel transcript, sense intronic C19orf42" |             |                        |                |        |
| -                                         | 93                                 | 155                                         | 136         | 220                    | 302            | 223    |
| 3.452827758                               | 4.639411656                        | 4.276993767                                 |             | 7.221395824            |                |        |
| 8.934346545                               | 7.067212532                        |                                             |             |                        |                |        |
| ENSG00000112651                           | 986.8883094                        | 1147.565512                                 |             | 1187.047277            |                |        |
| 1646.503706                               | 1389.980874                        | 1611.155883                                 |             | 1107.167033            |                |        |
| 1549.213487                               | -0.483982761                       | 0.001784846                                 |             | 0.016728961            |                | MRPL2  |
| 6                                         | 43054029                           | 43059806                                    |             | -                      | 2539           |        |
| protein_coding                            | mitochondrial ribosomal protein L2 | [Source:HGNC                                |             |                        |                |        |
| Symbol;Acc:HGNC:14056]                    | -                                  | 853                                         | 1238        | 1214                   | 1639           | 1521   |
| 1642                                      | 18.37304095                        | 21.49769524                                 |             | 22.14922025            |                |        |
| 31.21170325                               | 26.10508496                        | 30.18953945                                 |             |                        |                |        |
| ENSG00000132819                           | 495.1795972                        | 675.7473817                                 |             | 805.7058949            |                |        |
| 1131.155078                               | 971.4330497                        | 948.8354073                                 |             | 658.8776246            |                |        |
| 1017.141178                               | -0.625204442                       | 0.001786375                                 |             | 0.016733033            |                | RBM38  |
| 20                                        | 57391407                           | 57409333                                    |             | +                      | 2686           |        |
| protein_coding                            | RNA binding motif protein 38       | [Source:HGNC                                |             |                        |                |        |
| Symbol;Acc:HGNC:15818]                    | -                                  | 428                                         | 729         | 824                    | 1126           | 1063   |
| 967                                       | 8.714299327                        | 11.96617853                                 |             | 14.21096792            |                |        |
| 20.26905955                               | 17.24589962                        | 16.8060829                                  |             |                        |                |        |
| ENSG00000234264                           | 15.04050178                        | 10.19646255                                 |             | 8.800185745            |                | 0      |
| 0                                         | 0                                  | 11.34571669                                 | 0           | 5.99540715             |                |        |
| 0.001789415                               | 1                                  | DEPDC1-AS1                                  | 1           | 68496676               |                |        |
| 68538627                                  | +                                  | 1247                                        | antisense   | DEPDC1 antisense RNA 1 |                |        |
| [Source:HGNC                              | Symbol;Acc:HGNC:50592]             | -                                           |             | 13                     | 11             | 9      |
| 0                                         | 0                                  | 0                                           | 0.570127004 | 0.388919922            |                |        |
| 0.334332435                               | 0                                  | 0                                           | 0           |                        |                |        |
| ENSG00000003436                           | 1457.771711                        | 1028.915766                                 |             | 1135.223961            |                |        |
| 852.8869105                               | 793.2303736                        | 832.0707605                                 |             | 1207.303813            |                |        |
| 826.0626815                               | 0.546744946                        | 0.001792788                                 |             | 0.016782826            |                | TFPI   |
| 2                                         | 187464230                          | 187565760                                   |             | -                      | 11714          |        |
| protein_coding                            | tissue factor pathway inhibitor    | [Source:HGNC                                |             |                        |                |        |
| Symbol;Acc:HGNC:11760]                    | -                                  | 1260                                        | 1110        | 1161                   | 849            | 868    |
| 848                                       | 5.882474296                        | 4.177839167                                 |             | 4.591234296            |                |        |
| 3.504319433                               | 3.229037608                        | 3.37937719                                  |             |                        |                |        |
| ENSG00000132254                           | 1627.845078                        | 2035.584705                                 |             | 1932.12967             |                |        |
| 2551.628684                               | 2475.646408                        | 2552.141566                                 |             | 1865.186484            |                |        |
| 2526.472219                               | -0.437286749                       | 0.001796234                                 |             | 0.01680346             |                | ARFIP2 |
| 11                                        | 6474683                            | 6481479                                     | -           | 5312                   | protein_coding | ADP    |
| ribosylation factor interacting protein 2 | [Source:HGNC                       |                                             |             |                        |                |        |
| Symbol;Acc:HGNC:17160]                    | -                                  | 1407                                        | 2196        | 1976                   | 2540           | 2709   |
| 2601                                      | 14.48540839                        | 18.22670764                                 |             | 17.23182715            |                |        |

|                                                  |                                                                    |             |             |             |             |
|--------------------------------------------------|--------------------------------------------------------------------|-------------|-------------|-------------|-------------|
| 23.11941638                                      | 22.22335053                                                        | 22.85747859 |             |             |             |
| ENSG00000142669                                  | 4225.22404                                                         | 4708.911796 | 4062.752419 |             |             |
| 5378.511801                                      | 5911.759547                                                        | 5705.768246 | 4332.296085 |             |             |
| 5665.346531                                      | -0.386975605                                                       | 0.001798167 | 0.01680346  |             |             |
| SH3BGR13                                         | 1                                                                  | 26279176    | 26281522    | +           | 1786        |
|                                                  | protein_coding SH3 domain binding glutamate rich protein like      |             |             |             |             |
| 3 [Source:HGNC Symbol;Acc:HGNC:15568]            | -                                                                  |             | 3652        | 5080        | 4155        |
| 5354                                             | 6469                                                               | 5815        | 111.8263184 | 125.4053936 |             |
| 107.7685475                                      | 144.9432946                                                        | 157.8389904 | 151.9897499 |             |             |
| ENSG00000108946                                  | 5637.874246                                                        | 4921.183607 | 4947.659986 |             |             |
| 3674.747136                                      | 3931.425193                                                        | 4175.072035 | 5168.905946 |             |             |
| 3927.081455                                      | 0.396234805                                                        | 0.00179829  | 0.01680346  |             |             |
| PRKAR1A 17                                       | 68511780                                                           | 68551319    | +           | 6821        |             |
|                                                  | protein_coding protein kinase cAMP-dependent type I regulatory     |             |             |             |             |
| subunit alpha [Source:HGNC Symbol;Acc:HGNC:9388] | -                                                                  |             |             |             | 4873        |
| 5309                                             | 5060                                                               | 3658        | 4302        | 4255        | 39.06996972 |
| 34.31615603                                      | 34.36409596                                                        | 25.92966274 | 27.4840642  |             |             |
| 29.12041439                                      |                                                                    |             |             |             |             |
| ENSG00000012061                                  | 1420.748938                                                        | 1445.116829 | 1435.408075 |             |             |
| 1812.259113                                      | 1857.877131                                                        | 2192.03547  | 1433.757947 |             |             |
| 1954.057238                                      | -0.446598328                                                       | 0.001801288 | 0.016821193 |             | ERCC1       |
| 19                                               | 45407333                                                           | 45478828    | -           | 5576        |             |
|                                                  | protein_coding "ERCC excision repair 1, endonuclease non-catalytic |             |             |             |             |
| subunit [Source:HGNC Symbol;Acc:HGNC:3433]"      | -                                                                  |             |             | 1228        | 1559        |
| 1468                                             | 1804                                                               | 2033        | 2234        | 12.04398801 | 12.3269975  |
| 12.1956723                                       | 15.64281772                                                        | 15.88814561 | 18.70279181 |             |             |
| ENSG00000066629                                  | 1146.549021                                                        | 1176.300998 | 958.2424478 |             |             |
| 722.2917416                                      | 728.3463223                                                        | 835.0144071 | 1093.697489 |             |             |
| 761.884157                                       | 0.52152005                                                         | 0.001802931 | 0.016826259 |             | EML1        |
| 14                                               | 99737693                                                           | 99942060    | +           | 8935        |             |
|                                                  | protein_coding echinoderm microtubule associated protein like 1    |             |             |             |             |
| [Source:HGNC Symbol;Acc:HGNC:3330]               | -                                                                  |             | 991         | 1269        | 980         |
| 719                                              | 797                                                                | 851         | 6.065600605 | 6.261826399 |             |
| 5.080821935                                      | 3.890769924                                                        | 3.887070006 | 4.446118557 |             |             |
| ENSG00000254470                                  | 548.3998343                                                        | 746.1956684 | 834.062049  |             |             |
| 1264.763982                                      | 898.3242595                                                        | 1132.322709 | 709.5525172 |             |             |
| 1098.470317                                      | -0.629288525                                                       | 0.001804904 | 0.016834391 |             | AP5B1       |
| 11                                               | 65775893                                                           | 65780802    | -           | 4811        |             |
|                                                  | protein_coding adaptor related protein complex 5 subunit beta 1    |             |             |             |             |
| [Source:HGNC Symbol;Acc:HGNC:25104]              | -                                                                  |             | 474         | 805         | 853         |
| 1259                                             | 983                                                                | 1154        | 5.388125435 | 7.377249667 |             |
| 8.213270571                                      | 12.65294411                                                        | 8.903827934 | 11.19738183 |             |             |
| ENSG00000110074                                  | 709.2175072                                                        | 597.8834858 | 775.394144  |             |             |
| 477.1746555                                      | 434.0834418                                                        | 473.9270959 | 694.1650457 |             |             |
| 461.7283977                                      | 0.588127362                                                        | 0.001807452 | 0.016847879 |             |             |
| FOXRED1 11                                       | 126269055                                                          | 126278131   | +           | 5657        |             |
|                                                  | protein_coding FAD dependent oxidoreductase domain containing 1    |             |             |             |             |
| [Source:HGNC Symbol;Acc:HGNC:26927]              | -                                                                  |             | 613         | 645         | 793         |
| 475                                              | 475                                                                | 483         | 5.926100448 | 5.026983895 |             |
| 6.493658783                                      | 4.059837468                                                        | 3.659030492 | 3.985721853 |             |             |

|                                      |                                                      |             |             |        |
|--------------------------------------|------------------------------------------------------|-------------|-------------|--------|
| ENSG00000231925                      | 2670.267548                                          | 2817.004517 | 3789.946661 |        |
| 1937.83139                           | 2420.814815                                          | 2142.974695 | 3092.406242 |        |
| 2167.206967                          | 0.512934265                                          | 0.001810698 | 0.016867845 | TAPBP  |
| 6                                    | 33299694                                             | 33314387    | - 5056      |        |
| protein_coding                       | TAP binding protein [Source:HGNC                     |             |             |        |
| Symbol;Acc:HGNC:11566]               | -                                                    | 2308 3039   | 3876 1929   | 2649   |
| 2184                                 | 24.96453332                                          | 26.50071508 | 35.51232928 |        |
| 18.44702681                          | 22.83144983                                          | 20.16469254 |             |        |
| ENSG00000163597                      | 1819.900716                                          | 1758.426314 | 1735.592189 |        |
| 1320.015784                          | 1367.134377                                          | 1273.617744 | 1771.306406 |        |
| 1320.255968                          | 0.423822616                                          | 0.001816678 | 0.016913252 | SNHG16 |
| 17                                   | 76557766                                             | 76565348    | + 5362      |        |
| processed_transcript                 | small nucleolar RNA host gene 16 [Source:HGNC        |             |             |        |
| Symbol;Acc:HGNC:44352]               | -                                                    | 1573 1897   | 1775 1314   | 1496   |
| 1298                                 | 16.04340791                                          | 15.59819981 | 15.33465478 |        |
| 11.84867459                          | 12.15803479                                          | 11.30040266 |             |        |
| ENSG00000178904                      | 1355.959084                                          | 1182.789656 | 1286.782716 |        |
| 1030.697256                          | 852.6312656                                          | 796.7470018 | 1275.177152 |        |
| 893.3585077                          | 0.513276519                                          | 0.001817972 | 0.016914994 |        |
| DPY19L3 19                           | 32405543                                             | 32485895    | + 10781     |        |
| protein_coding                       | dpy-19 like C-mannosyltransferase 3 [Source:HGNC     |             |             |        |
| Symbol;Acc:HGNC:27120]               | -                                                    | 1172 1276   | 1316 1026   | 933    |
| 812                                  | 5.945156321                                          | 5.218258465 | 5.65456628  |        |
| 4.601395159                          | 3.771214156                                          | 3.515952661 |             |        |
| ENSG00000161277                      | 252.2176453                                          | 224.3221761 | 193.6040864 |        |
| 313.4284053                          | 477.034856                                           | 364.0309577 | 223.3813026 |        |
| 384.8314063                          | -0.786333371                                         | 0.001822352 | 0.016937484 | THAP8  |
| 19                                   | 36034985                                             | 36054762    | - 1825      |        |
| protein_coding                       | THAP domain containing 8 [Source:HGNC                |             |             |        |
| Symbol;Acc:HGNC:23191]               | THAP                                                 | 218 242     | 198 312     | 522    |
| 371                                  | 6.53263416                                           | 5.846372127 | 5.025795085 |        |
| 8.265953193                          | 12.46425232                                          | 9.489800371 |             |        |
| ENSG00000103111                      | 1529.503335                                          | 1721.348269 | 1694.524655 |        |
| 2391.900747                          | 2297.443732                                          | 2017.379108 | 1648.458753 |        |
| 2235.574529                          | -0.43922485                                          | 0.001822605 | 0.016937484 | MON1B  |
| 16                                   | 77190835                                             | 77202405    | + 6942      |        |
| protein_coding                       | "MON1 homolog B, secretory trafficking associated    |             |             |        |
| [Source:HGNC Symbol;Acc:HGNC:25020]" | -                                                    |             | 1322 1857   | 1733   |
| 2381                                 | 2514 2056                                            | 10.41457516 | 11.7940035  |        |
| 11.5642217                           | 16.58349265                                          | 15.78117231 | 13.82561748 |        |
| ENSG00000170909                      | 100.6556658                                          | 292.9165605 | 155.4699482 |        |
| 377.7214115                          | 315.2816577                                          | 447.4342769 | 183.0140582 |        |
| 380.145782                           | -1.050940535                                         | 0.001831791 | 0.017012505 | OSCAR  |
| 19                                   | 54094668                                             | 54102692    | - 2084      |        |
| protein_coding                       | "osteoclast associated, immunoglobulin-like receptor |             |             |        |
| [Source:HGNC Symbol;Acc:HGNC:29960]" | -                                                    |             | 87 316      | 159    |
| 376                                  | 345 456                                              | 2.283054352 | 6.685337332 |        |
| 3.534287425                          | 8.723511678                                          | 7.214063789 | 10.21440712 |        |
| ENSG00000179119                      | 998.4579261                                          | 965.8830888 | 908.3747286 |        |
| 1223.576274                          | 1394.550173                                          | 1353.096201 | 957.5719145 |        |

|                                     |                                                 |             |             |             |
|-------------------------------------|-------------------------------------------------|-------------|-------------|-------------|
| 1323.740883                         | -0.467509064                                    | 0.001833195 | 0.017015214 |             |
| SPTY2D1 11                          | 18606401                                        | 18634791    | - 6005      |             |
| protein_coding                      | SPT2 chromatin protein domain containing 1      |             |             |             |
| [Source:HGNC Symbol;Acc:HGNC:26818] | -                                               | 863         | 1042        | 929         |
| 1218                                | 1526                                            | 1379        | 7.859456177 | 7.650479666 |
| 7.166467869                         | 9.806984594                                     | 11.07388782 | 10.72006183 |             |
| ENSG00000196843                     | 225.6075268                                     | 480.160691  | 422.4089158 |             |
| 558.5454914                         | 661.6345512                                     | 767.3105362 | 376.0590445 |             |
| 662.4968596                         | -0.814824674                                    | 0.001845182 | 0.01711444  | ARID5A      |
| 2                                   | 96536743                                        | 96552638    | + 3565      |             |
| protein_coding                      | AT-rich interaction domain 5A [Source:HGNC      |             |             |             |
| Symbol;Acc:HGNC:17361]              | ARID                                            | 195 518     | 432 556     | 724         |
| 782                                 | 2.991367631                                     | 6.406254437 | 5.613408765 |             |
| 7.54078353                          | 8.84988505                                      | 10.23984198 |             |             |
| ENSG00000154370                     | 717.3162389                                     | 1196.693923 | 997.3543845 |             |
| 1384.30879                          | 1567.26969                                      | 1436.499521 | 970.4548488 |             |
| 1462.692667                         | -0.590864125                                    | 0.001846125 | 0.01711444  | TRIM11      |
| 1                                   | 228393673                                       | 228406840   | - 8493      |             |
| protein_coding                      | tripartite motif containing 11 [Source:HGNC     |             |             |             |
| Symbol;Acc:HGNC:16281]              | -                                               | 620 1291    | 1020 1378   | 1715        |
| 1464                                | 3.992319391                                     | 6.701917481 | 5.563415594 |             |
| 7.844934285                         | 8.799572991                                     | 8.046851532 |             |             |
| ENSG00000173905                     | 2263.017038                                     | 2123.645064 | 3110.376762 |             |
| 2006.142709                         | 1366.220517                                     | 1657.273012 | 2499.012954 |             |
| 1676.545413                         | 0.576136581                                     | 0.001850567 | 0.01714052  | GOLIM4      |
| 3                                   | 168008677                                       | 168095975   | - 4647      |             |
| protein_coding                      | golgi integral membrane protein 4 [Source:HGNC  |             |             |             |
| Symbol;Acc:HGNC:15448]              | -                                               | 1956 2291   | 3181 1997   | 1495        |
| 1689                                | 23.01923522                                     | 21.7363378  | 31.70979632 |             |
| 20.77813716                         | 14.01932546                                     | 16.96692003 |             |             |
| ENSG00000111252                     | 2965.292775                                     | 2615.856119 | 3504.429524 |             |
| 2389.89159                          | 1814.011857                                     | 2232.265307 | 3028.526139 |             |
| 2145.389585                         | 0.497507005                                     | 0.001851181 | 0.01714052  | SH2B3       |
| 12                                  | 111405948                                       | 111451623   | + 5682      |             |
| protein_coding                      | SH2B adaptor protein 3 [Source:HGNC             |             |             |             |
| Symbol;Acc:HGNC:29605]              | -                                               | 2563 2822   | 3584 2379   | 1985        |
| 2275                                | 24.66846291                                     | 21.89725813 | 29.21926098 |             |
| 20.24391146                         | 15.22361806                                     | 18.69072757 |             |             |
| ENSG00000196419                     | 11392.60162                                     | 10264.12998 | 11343.43943 |             |
| 9228.055548                         | 8089.487635                                     | 8115.633562 | 11000.05701 |             |
| 8477.725581                         | 0.375748717                                     | 0.001857576 | 0.017189325 | XRCC6       |
| 22                                  | 41621119                                        | 41664048    | + 3288      |             |
| protein_coding                      | X-ray repair cross complementing 6 [Source:HGNC |             |             |             |
| Symbol;Acc:HGNC:4055]               | -                                               | 9847 11073  | 11601 9186  | 8852        |
| 8271                                | 163.7822533                                     | 148.4798257 | 163.4429054 |             |
| 135.081492                          | 117.3189572                                     | 117.4281578 |             |             |
| ENSG00000092199                     | 10924.03214                                     | 11244.84429 | 12251.81415 |             |
| 8770.972456                         | 8773.968683                                     | 9307.810418 | 11473.56353 |             |
| 8950.917186                         | 0.358244071                                     | 0.001859658 | 0.017198179 | HNRNPC      |
| 14                                  | 21209136                                        | 21269494    | - 7309      |             |

|                                                                      |                                                     |             |                      |                |                |             |  |
|----------------------------------------------------------------------|-----------------------------------------------------|-------------|----------------------|----------------|----------------|-------------|--|
| protein_coding                                                       | heterogeneous nuclear ribonucleoprotein C (C1/C2)   |             |                      |                |                |             |  |
| [Source:HGNC Symbol;Acc:HGNC:5035]                                   | -                                                   | 9442        | 12131                | 12530          |                |             |  |
| 8731                                                                 | 9601                                                | 9486        | 70.64814237          | 73.17666265    |                |             |  |
| 79.4137245                                                           | 57.75734786                                         | 57.24230397 | 60.58584846          |                |                |             |  |
| ENSG00000198794                                                      | 21.98227184                                         | 38.00499677 | 42.04533189          |                |                |             |  |
| 130.5951689                                                          | 85.90282848                                         | 73.59116396 | 34.01086684          |                |                |             |  |
| 96.6963871                                                           | -1.501562281                                        | 0.001874186 | 0.017322057          |                |                | SCAMP5      |  |
| 15                                                                   | 74957219                                            | 75021496    | +                    | 4873           |                |             |  |
| protein_coding                                                       | secretory carrier membrane protein 5 [Source:HGNC   |             |                      |                |                |             |  |
| Symbol;Acc:HGNC:30386]                                               | -                                                   | 19          | 41                   | 43             | 130            | 94          |  |
| 75                                                                   | 0.213231765                                         | 0.370955149 | 0.40876575           |                |                |             |  |
| 1.28987658                                                           | 0.840601266                                         | 0.718473721 |                      |                |                |             |  |
| ENSG00000067221                                                      | 433.8606284                                         | 646.0849452 | 596.4570339          |                |                |             |  |
| 858.9143798                                                          | 849.889686                                          | 833.051976  | 558.8008691          |                |                |             |  |
| 847.2853473                                                          | -0.598994431                                        | 0.001875608 | 0.017324729          |                |                | STOML1      |  |
| 15                                                                   | 73978923                                            | 73994622    | -                    | 10461          |                |             |  |
| protein_coding                                                       | stomatin like 1 [Source:HGNC Symbol;Acc:HGNC:14560] |             |                      |                |                |             |  |
| -                                                                    | 375                                                 | 697         | 610                  | 855            | 930            | 849         |  |
| 1.960436494                                                          | 2.937605915                                         | 2.701214602 | 3.951792468          |                |                |             |  |
| 3.874077855                                                          | 3.788615432                                         |             |                      |                |                |             |  |
| ENSG00000224431                                                      | 9.255693406                                         | 15.75816939 | 8.800185745          | 0              |                |             |  |
| 0                                                                    | 0                                                   | 11.27134952 | 0                    | 5.988792942    |                |             |  |
| 0.001879336                                                          | 1                                                   | AC063976.2  | 5                    | 132199456      |                |             |  |
| 132203487                                                            | +                                                   | 3556        | processed_pseudogene | cytoplasmic    |                |             |  |
| linker associated protein 2 (CLASP2) pseudogene                      | -                                                   | 8           | 17                   |                |                |             |  |
| 9                                                                    | 0                                                   | 0           | 0                    | 0.123033378    | 0.210775985    |             |  |
| 0.117241999                                                          | 0                                                   | 0           | 0                    |                |                |             |  |
| ENSG00000178343                                                      | 59.00504546                                         | 39.85889906 | 76.26827646          | 0              |                |             |  |
| 21.93263706                                                          | 2.943646558                                         | 58.37740699 | 8.292094539          |                |                |             |  |
| 2.803183202                                                          | 0.001890802                                         | 0.017443065 | SHISA3               | 4              |                |             |  |
| 42397839                                                             | 42402487                                            | +           | 1971                 | protein_coding |                |             |  |
| shisa family member 3 [Source:HGNC Symbol;Acc:HGNC:25159]            |                                                     |             |                      |                |                |             |  |
| -                                                                    | 51                                                  | 43          | 78                   | 0              | 24             | 3           |  |
| 1.41507111                                                           | 0.961868692                                         | 1.833202472 | 0                    | 0.530619511    |                |             |  |
| 0.071052713                                                          |                                                     |             |                      |                |                |             |  |
| ENSG00000274276                                                      | 91.39997238                                         | 38.00499677 | 103.6466321          |                |                |             |  |
| 25.11445555                                                          | 27.41579632                                         | 15.69944831 | 77.68386709          |                |                |             |  |
| 22.74323339                                                          | 1.769566083                                         | 0.001891571 | 0.017443065          |                |                | CBSL        |  |
| 21                                                                   | 6444869                                             | 6468040     | -                    | 4004           | protein_coding |             |  |
| cystathionine-beta-synthase like [Source:HGNC Symbol;Acc:HGNC:51829] |                                                     |             |                      |                |                |             |  |
| -                                                                    | 79                                                  | 41          | 106                  | 25             | 30             | 16          |  |
| 1.079015629                                                          | 0.451464645                                         | 1.226349483 | 0.301888908          |                |                |             |  |
| 0.326501953                                                          | 0.18653999                                          |             |                      |                |                |             |  |
| ENSG00000116198                                                      | 1103.741439                                         | 1325.540131 | 994.4209892          |                |                |             |  |
| 1674.631896                                                          | 1438.415447                                         | 1777.962521 | 1141.234186          |                |                |             |  |
| 1630.336621                                                          | -0.514146917                                        | 0.001891843 | 0.017443065          |                |                | CEP104      |  |
| 1                                                                    | 3812081                                             | 3857214     | -                    | 7876           | protein_coding |             |  |
| centrosomal protein 104 [Source:HGNC Symbol;Acc:HGNC:24866]          |                                                     |             |                      |                |                |             |  |
| 954                                                                  | 1430                                                | 1017        | 1667                 | 1574           | 1812           | 6.624260152 |  |
| 8.005054407                                                          | 5.981604595                                         | 10.23366294 | 8.70878599           |                |                |             |  |

|                         |                                     |              |                      |             |                |        |
|-------------------------|-------------------------------------|--------------|----------------------|-------------|----------------|--------|
| 10.73985757             |                                     |              |                      |             |                |        |
| ENSG00000275956         | 3.470885027                         | 25.95463194  | 6.844588913          | 0           |                |        |
| 0                       | 0                                   | 12.09003529  | 0                    | 6.092708838 |                |        |
| 0.001898763             | 1                                   | AC104446.1   | 3                    | 52732547    |                |        |
| 52733867                | +                                   | 1321         | processed_pseudogene | zinc finger |                |        |
| protein 610 (ZNF610)    | pseudogene                          | -            | 3                    | 28          | 7              | 0      |
| 0                       | 0                                   | 0.124197585  | 0.93452123           | 0.245469579 |                |        |
| 0                       | 0                                   | 0            |                      |             |                |        |
| ENSG00000007520         | 979.9465393                         | 1534.104138  | 1343.495024          |             |                |        |
| 1687.691413             | 1820.408876                         | 2260.720557  | 1285.848567          |             |                |        |
| 1922.940282             | -0.579811727                        | 0.001901015  | 0.017517064          | TSR3        |                |        |
| 16                      | 1349240                             | 1351911      | -                    | 1243        | protein_coding | "TSR3, |
| acp transferase         | ribosome maturation factor          | [Source:HGNC |                      |             |                |        |
| Symbol;Acc:HGNC:14175]" | -                                   | 847          | 1655                 | 1374        | 1680           | 1992   |
| 2304                    | 37.26550359                         | 58.70307179  | 51.20567081          |             |                |        |
| 65.34906371             | 69.83558945                         | 86.52814272  |                      |             |                |        |
| ENSG000000072121        | 585.4226079                         | 608.0799484  | 655.1249388          |             |                |        |
| 998.5507527             | 792.3165137                         | 895.8497693  | 616.209165           |             |                |        |
| 895.5723452             | -0.538836399                        | 0.00190458   | 0.017539348          |             |                |        |
| ZFYVE26 14              | 67727374                            | 67816590     | -                    | 15706       |                |        |
| protein_coding          | zinc finger FYVE-type containing 26 | [Source:HGNC |                      |             |                |        |
| Symbol;Acc:HGNC:20761]" | -                                   | 506          | 656                  | 670         | 994            | 867    |
| 913                     | 1.761893431                         | 1.84150204   | 1.9761125            |             |                |        |
| 3.060004096             | 2.405537337                         | 2.713633676  |                      |             |                |        |
| ENSG00000107815         | 1064.404742                         | 1212.452092  | 1365.006589          |             |                |        |
| 1724.860807             | 1587.374607                         | 1748.526056  | 1213.954474          |             |                |        |
| 1686.92049              | -0.474088959                        | 0.001910135  | 0.01757991           | TWINK       |                |        |
| 10                      | 100987367                           | 100994401    | +                    | 4133        |                |        |
| protein_coding          | twinkle mtDNA helicase              | [Source:HGNC |                      |             |                |        |
| Symbol;Acc:HGNC:1160]"  | -                                   | 920          | 1308                 | 1396        | 1717           | 1737   |
| 1782                    | 12.17354694                         | 13.95327959  | 15.64668966          |             |                |        |
| 20.08658498             | 18.31441331                         | 20.12743025  |                      |             |                |        |
| ENSG00000284753         | 82.14427898                         | 125.138404   | 98.75764003          |             |                |        |
| 175.8011889             | 240.3451478                         | 193.2994573  | 102.013441           |             |                |        |
| 203.148598              | -0.991441897                        | 0.001912057  | 0.017587014          |             |                |        |
| EEF1AKMT4               | 3                                   | 184249650    | 184259585            | +           | 1823           |        |
| protein_coding          | EEF1A lysine methyltransferase 4    | [Source:HGNC |                      |             |                |        |
| Symbol;Acc:HGNC:53611]" | -                                   | 71           | 135                  | 101         | 175            | 263    |
| 197                     | 2.129935209                         | 3.264984003  | 2.566475726          |             |                |        |
| 4.641438459             | 6.286771527                         | 5.044586733  |                      |             |                |        |
| ENSG00000122863         | 476.6682104                         | 452.3521567  | 599.3904291          |             |                |        |
| 371.6939421             | 265.9332243                         | 304.176811   | 509.4702654          |             |                |        |
| 313.9346592             | 0.69928598                          | 0.001921814  | 0.017666126          | CHST3       |                |        |
| 10                      | 71964365                            | 72013564     | +                    | 6970        |                |        |
| protein_coding          | carbohydrate sulfotransferase 3     | [Source:HGNC |                      |             |                |        |
| Symbol;Acc:HGNC:1971]"  | -                                   | 412          | 488                  | 613         | 370            | 291    |
| 310                     | 3.232653459                         | 3.08688892   | 4.074085624          |             |                |        |
| 2.566670756             | 1.819360697                         | 2.07622756   |                      |             |                |        |
| ENSG00000188549         | 431.546705                          | 461.6216681  | 586.6790497          |             |                |        |
| 278.2681675             | 215.6709311                         | 370.8994664  | 493.2824743          |             |                |        |

|                                                         |                                                   |             |                |        |
|---------------------------------------------------------|---------------------------------------------------|-------------|----------------|--------|
| 288.2795216                                             | 0.775953864                                       | 0.001925751 | 0.017691678    | CCDC9B |
| 15                                                      | 40331452                                          | 40340967    | - 7510         |        |
| protein_coding                                          | coiled-coil domain containing 9B [Source:HGNC     |             |                |        |
| Symbol;Acc:HGNC:33488]                                  | -                                                 | 373 498     | 600 277        | 236    |
| 378                                                     | 2.71621165                                        | 2.923636423 | 3.700954699    |        |
| 1.783368324                                             | 1.369401073                                       | 2.349621452 |                |        |
| ENSG00000204498                                         | 268.4151088                                       | 333.7024107 | 409.6975364    |        |
| 541.4676617                                             | 532.7803085                                       | 540.6497512 | 337.2716853    |        |
| 538.2992405                                             | -0.67300341                                       | 0.001932889 | 0.01774659     |        |
| NFKBIL1 6                                               | 31546870                                          | 31558829    | + 1779         |        |
| protein_coding                                          | NFKB inhibitor like 1 [Source:HGNC                |             |                |        |
| Symbol;Acc:HGNC:7800]                                   | -                                                 | 232 360     | 419 539        | 583    |
| 551                                                     | 7.131924706                                       | 8.921964906 | 10.91039642    |        |
| 14.64920423                                             | 14.28075618                                       | 14.45844831 |                |        |
| ENSG00000175426                                         | 102.9695891                                       | 97.32986979 | 88.00185745    |        |
| 36.16481599                                             | 29.24351608                                       | 46.11712942 | 96.10043879    |        |
| 37.17515383                                             | 1.370956188                                       | 0.001938105 | 0.017768777    | PCSK1  |
| 5                                                       | 96390415                                          | 96434143    | - 5307         |        |
| protein_coding                                          | proprotein convertase subtilisin/kexin type 1     |             |                |        |
| [Source:HGNC Symbol;Acc:HGNC:8743]                      | -                                                 |             | 89 105         | 90     |
| 36                                                      | 32 47                                             | 0.917139993 | 0.872316665    |        |
| 0.785589875                                             | 0.327985489                                       | 0.262760142 | 0.413423164    |        |
| ENSG00000167658                                         | 57720.818                                         | 62815.77101 | 62820.61484    |        |
| 81912.30365                                             | 71461.10083                                       | 81761.74559 | 61119.06795    |        |
| 78378.38336                                             | -0.358819666                                      | 0.001938312 | 0.017768777    | EEF2   |
| 19                                                      | 3976056 3985469                                   | - 4027      | protein_coding |        |
| eukaryotic translation elongation factor 2 [Source:HGNC |                                                   |             |                |        |
| Symbol;Acc:HGNC:3214]                                   | -                                                 | 49890 67766 | 64247 81539    | 78197  |
| 83327                                                   | 677.5269691                                       | 741.9321314 | 739.0497584    |        |
| 979.0051307                                             | 846.1883853                                       | 965.940004  |                |        |
| ENSG00000131370                                         | 111.0683209                                       | 68.59438442 | 100.7132369    |        |
| 256.1674466                                             | 155.3561792                                       | 177.600009  | 93.45864739    |        |
| 196.3745449                                             | -1.07330475                                       | 0.001939818 | 0.017768777    | SH3BP5 |
| 3                                                       | 15254853                                          | 15341368    | - 4159         |        |
| protein_coding                                          | SH3 domain binding protein 5 [Source:HGNC         |             |                |        |
| Symbol;Acc:HGNC:10827]                                  | -                                                 | 96 74       | 103 255        | 170    |
| 181                                                     | 1.262341981                                       | 0.784470754 | 1.1472307      |        |
| 2.964506975                                             | 1.781224249                                       | 2.031588241 |                |        |
| ENSG00000167700                                         | 193.2125998                                       | 304.9669253 | 433.1646984    |        |
| 138.6317946                                             | 86.81668835                                       | 205.0740436 | 310.4480745    |        |
| 143.5075089                                             | 1.115262698                                       | 0.001939955 | 0.017768777    | MFSD3  |
| 8                                                       | 144509074                                         | 144511213   | + 1823         |        |
| protein_coding                                          | major facilitator superfamily domain containing 3 |             |                |        |
| [Source:HGNC Symbol;Acc:HGNC:25157]                     | -                                                 |             | 167 329        | 443    |
| 138                                                     | 95 209                                            | 5.009847605 | 7.956886942    |        |
| 11.25691828                                             | 3.660105756                                       | 2.270887054 | 5.351871204    |        |
| ENSG00000138771                                         | 242.9619519                                       | 231.7377852 | 374.4967934    |        |
| 118.5402302                                             | 191.9105743                                       | 123.6331555 | 283.0655102    |        |
| 144.6946533                                             | 0.967304695                                       | 0.00195058  | 0.017855396    |        |
| SHROOM3 4                                               | 76435100                                          | 76783253    | + 13958        |        |



|                                     |                                                        |             |             |             |      |        |
|-------------------------------------|--------------------------------------------------------|-------------|-------------|-------------|------|--------|
| protein_coding                      | shroom family member 3 [Source:HGNC                    |             |             |             |      |        |
| Symbol;Acc:HGNC:30422]              | -                                                      | 210         | 250         | 383         | 118  | 210    |
| 126                                 | 0.822793427                                            | 0.789679334 | 1.271095074 |             |      |        |
| 0.408752131                         | 0.655623782                                            | 0.42139889  |             |             |      |        |
| ENSG00000224184                     | 151.5619795                                            | 177.974619  | 263.0277739 |             |      |        |
| 59.2701151                          | 85.90282848                                            | 122.6519399 | 197.5214575 |             |      |        |
| 89.27496117                         | 1.146326482                                            | 0.001951901 | 0.017856796 |             |      |        |
| MIR3681HG                           | 2                                                      | 11848622    | 12578348    | +           |      | 3876   |
| lincRNA                             | MIR3681 host gene [Source:HGNC Symbol;Acc:HGNC:52001]  |             |             |             |      |        |
| -                                   | 131                                                    | 192         | 269         | 59          | 94   | 125    |
| 1.848341608                         | 2.183993886                                            | 3.2149259   | 0.735985842 |             |      |        |
| 1.056824038                         | 1.505470606                                            |             |             |             |      |        |
| ENSG00000171617                     | 1133.822442                                            | 908.412118  | 1432.47468  |             |      |        |
| 808.6854687                         | 754.8482587                                            | 751.6110879 | 1158.236413 |             |      |        |
| 771.7149385                         | 0.585734135                                            | 0.00195616  | 0.017878508 |             |      | ENC1   |
| 5                                   | 74627406                                               | 74641424    | -           | 5858        |      |        |
| protein_coding                      | ectodermal-neural cortex 1 [Source:HGNC                |             |             |             |      |        |
| Symbol;Acc:HGNC:3345]               | -                                                      | 980         | 980         | 1465        | 805  | 826    |
| 766                                 | 9.148953517                                            | 7.375826058 | 11.58485795 |             |      |        |
| 6.644276994                         | 6.144538613                                            | 6.104153386 |             |             |      |        |
| ENSG0000020181                      | 400.3087398                                            | 679.4551862 | 1093.178629 |             |      |        |
| 476.1700772                         | 353.6637726                                            | 325.7635525 | 724.3141851 |             |      |        |
| 385.1991341                         | 0.91205147                                             | 0.001956613 | 0.017878508 |             |      | ADGRA2 |
| 8                                   | 37784191                                               | 37844896    | +           | 7061        |      |        |
| protein_coding                      | adhesion G protein-coupled receptor A2 [Source:HGNC    |             |             |             |      |        |
| Symbol;Acc:HGNC:17849]              | -                                                      | 346         | 733         | 1118        | 474  | 387    |
| 332                                 | 2.679813682                                            | 4.576903134 | 7.334627254 |             |      |        |
| 3.245737152                         | 2.38837959                                             | 2.194916019 |             |             |      |        |
| ENSG00000108448                     | 455.8429002                                            | 550.6089777 | 575.9232671 |             |      |        |
| 849.8731758                         | 734.7433414                                            | 758.4795965 | 527.4583817 |             |      |        |
| 781.0320379                         | -0.565180138                                           | 0.001961936 | 0.017909123 |             |      |        |
| TRIM16L 17                          | 18697998                                               | 18736118    | +           | 4329        |      |        |
| protein_coding                      | tripartite motif containing 16 like [Source:HGNC       |             |             |             |      |        |
| Symbol;Acc:HGNC:32670]              | -                                                      | 394         | 594         | 589         | 846  | 804    |
| 773                                 | 4.977409229                                            | 6.049685768 | 6.302751215 |             |      |        |
| 9.448959635                         | 8.093326494                                            | 8.33562069  |             |             |      |        |
| ENSG00000090432                     | 1493.637523                                            | 1467.363656 | 1485.275794 |             |      |        |
| 2389.89159                          | 1914.536443                                            | 1838.797883 | 1482.092324 |             |      |        |
| 2047.741972                         | -0.466316369                                           | 0.001962307 | 0.017909123 |             |      | MUL1   |
| 1                                   | 20499448                                               | 20508161    | -           | 2438        |      |        |
| protein_coding                      | mitochondrial E3 ubiquitin protein ligase 1            |             |             |             |      |        |
| [Source:HGNC Symbol;Acc:HGNC:25762] | -                                                      |             | 1291        | 1583        |      | 1519   |
| 2379                                | 2095                                                   | 1874        | 28.95924624 | 28.62735157 |      |        |
| 28.86200705                         | 47.18043679                                            | 37.44630099 | 35.88243618 |             |      |        |
| ENSG00000178252                     | 3974.163356                                            | 5083.400056 | 4924.192824 |             |      |        |
| 6440.350981                         | 5604.702628                                            | 6968.592619 | 4660.585412 |             |      |        |
| 6337.882076                         | -0.443231887                                           | 0.001963519 | 0.017909498 |             |      | WDR6   |
| 3                                   | 49007062                                               | 49015953    | +           | 5304        |      |        |
| protein_coding                      | WD repeat domain 6 [Source:HGNC Symbol;Acc:HGNC:12758] |             |             |             |      |        |
| -                                   | 3435                                                   | 5484        | 5036        | 6411        | 6133 | 7102   |

|                                                                       |                 |             |                |        |
|-----------------------------------------------------------------------|-----------------|-------------|----------------|--------|
| 35.41750295                                                           | 45.58562239     | 43.9829811  | 58.44178578    |        |
| 50.38810748                                                           | 62.50621312     |             |                |        |
| ENSG00000198840                                                       | 4653.29986      | 9653.269181 | 9898.253367    |        |
| 15744.75447                                                           | 15194.74818     | 24646.17142 | 8068.274136    |        |
| 18528.55802                                                           | -1.199370095    | 0.001969759 | 0.017955698    | MT-ND3 |
| MT                                                                    | 10059 10404     | + 346       | protein_coding |        |
| mitochondrially encoded NADH:ubiquinone oxidoreductase core subunit 3 |                 |             |                |        |
| [Source:HGNC Symbol;Acc:HGNC:7458]                                    |                 |             |                |        |
|                                                                       |                 | -           | 4022 10414     | 10123  |
| 15673                                                                 | 16627 25118     | 635.7123963 | 1327.013779    |        |
| 1355.300485                                                           | 2190.167102     | 2094.095077 | 3388.870655    |        |
| ENSG00000128626                                                       | 964.9060375     | 1550.789259 | 1410.963115    |        |
| 1728.87912                                                            | 1936.46908      | 2186.148177 | 1308.886137    |        |
| 1950.498793                                                           | -0.574697976    | 0.001980687 | 0.018044554    | MRPS12 |
| 19                                                                    | 38930548        | 38933162    | + 2144         |        |
| protein_coding mitochondrial ribosomal protein S12 [Source:HGNC       |                 |             |                |        |
| Symbol;Acc:HGNC:10380]                                                |                 |             |                |        |
|                                                                       | -               | 834 1673    | 1443 1721      | 2119   |
| 2228                                                                  | 21.27335475     | 34.4036973  | 31.17769512    |        |
| 38.811221                                                             | 43.06899854     | 48.51057711 |                |        |
| ENSG00000142541                                                       | 40871.98512     | 38603.80721 | 36258.72087    |        |
| 44248.65695                                                           | 53761.46273     | 52794.30103 | 38578.17107    |        |
| 50268.14023                                                           | -0.381878228    | 0.00198455  | 0.018068979    | RPL13A |
| 19                                                                    | 49487554        | 49492308    | + 2369         |        |
| protein_coding ribosomal protein L13a [Source:HGNC                    |                 |             |                |        |
| Symbol;Acc:HGNC:10304]                                                |                 |             |                |        |
|                                                                       | -               | 35327 41646 | 37082 44047    | 58829  |
| 53805                                                                 | 815.523369      | 775.0722571 | 725.104407     |        |
| 898.9850926                                                           | 1082.143869     | 1060.238598 |                |        |
| ENSG00000132481                                                       | 414.1922799     | 602.5182416 | 766.5939583    |        |
| 213.9751613                                                           | 307.0569188     | 446.4530614 | 594.4348266    |        |
| 322.4950472                                                           | 0.882888736     | 0.001987639 | 0.018086328    | TRIM47 |
| 17                                                                    | 75874161        | 75878575    | - 3142         |        |
| protein_coding tripartite motif containing 47 [Source:HGNC            |                 |             |                |        |
| Symbol;Acc:HGNC:19020]                                                |                 |             |                |        |
|                                                                       | -               | 358 650     | 784 213        | 336    |
| 455                                                                   | 6.231198104     | 9.120972239 | 11.55878905    |        |
| 3.277741043                                                           | 4.660061996     | 6.760070914 |                |        |
| ENSG00000160145                                                       | 159.6607112     | 130.7001109 | 155.4699482    |        |
| 63.28842799                                                           | 63.05633154     | 83.40331915 | 148.6102568    |        |
| 69.91602623                                                           | 1.087434657     | 0.001990143 | 0.018098341    | KALRN  |
| 3                                                                     | 124080023       | 124726325   | + 24490        |        |
| protein_coding kalirin RhoGEF kinase [Source:HGNC                     |                 |             |                |        |
| Symbol;Acc:HGNC:4814]                                                 |                 |             |                |        |
|                                                                       | -               | 138 141     | 159 63         | 69     |
| 85                                                                    | 0.308166208     | 0.25384247  | 0.300753573    |        |
| 0.124380695                                                           | 0.122777533     | 0.162022816 |                |        |
| ENSG00000072832                                                       | 279.9847255     | 370.7804563 | 306.0509043    |        |
| 614.8018719                                                           | 426.7725628     | 513.1757167 | 318.9386954    |        |
| 518.2500504                                                           | -0.698744297    | 0.001993715 | 0.01812005     | CRMP1  |
| 4                                                                     | 5748084 5893058 | - 5823      | protein_coding |        |
| collapsin response mediator protein 1 [Source:HGNC                    |                 |             |                |        |
| Symbol;Acc:HGNC:2365]                                                 |                 |             |                |        |
|                                                                       | -               | 242 400     | 313 612        | 467    |
| 523                                                                   | 2.272810822     | 3.02863655  | 2.490003762    |        |
| 5.081662859                                                           | 3.494851189     | 4.19276899  |                |        |

|                                                                                                        |              |             |             |                |
|--------------------------------------------------------------------------------------------------------|--------------|-------------|-------------|----------------|
| ENSG00000125817                                                                                        | 2293.098041  | 3320.338987 | 3982.572949 |                |
| 4829.007513                                                                                            | 4186.392098  | 5115.076503 | 3198.669992 |                |
| 4710.158705                                                                                            | -0.557932812 | 0.002000368 | 0.018159282 | CENPB          |
| 20                                                                                                     | 3783851      | 3786690 -   | 2840        | protein_coding |
| centromere protein B [Source:HGNC Symbol;Acc:HGNC:1852]                                                | -            |             |             | 1982           |
| 3582                                                                                                   | 4073         | 4807        | 4581 5213   | 38.16629676    |
| 55.60850243                                                                                            | 66.43524269  | 81.83837523 | 70.29113395 |                |
| 85.68709525                                                                                            |              |             |             |                |
| ENSG00000227500                                                                                        | 2191.285414  | 2811.44281  | 3081.042809 |                |
| 4341.787076                                                                                            | 3306.345036  | 3778.660965 | 2694.590344 |                |
| 3808.931026                                                                                            | -0.498901244 | 0.002000408 | 0.018159282 | SCAMP4         |
| 19                                                                                                     | 1905214      | 1926013 +   | 6953        | protein_coding |
| secretory carrier membrane protein 4 [Source:HGNC Symbol;Acc:HGNC:30385]                               | -            |             |             |                |
| 3851                                                                                                   | 14.89712487  | 1894 3033   | 3151 4322   | 3618           |
| 30.05479359                                                                                            | 22.67539864  | 19.23242905 | 20.99319934 |                |
| ENSG00000178458                                                                                        | 143.4632478  | 25.85516568 |             |                |
| 42.19228532                                                                                            | 59.40089203  | 90.8412118  | 126.1359957 |                |
| 50.21798444                                                                                            | 1.255624265  | 49.06077597 | 120.1468184 |                |
| H3F3AP6 4                                                                                              | 139698144    | 0.002002817 | 0.018170364 |                |
| processed_pseudogene "H3 histone, family 3A, pseudogene 6 [Source:HGNC Symbol;Acc:HGNC:42982]"         | -            |             |             |                |
| 42                                                                                                     | 65           | 50          | 16.49964408 | 10.51279539    |
| 14.53952921                                                                                            | 4.940929817  | 6.8917598   | 5.679030724 |                |
| ENSG00000174516                                                                                        | 249.903722   | 383.7577723 | 236.6272167 |                |
| 465.1197168                                                                                            | 413.9785245  | 639.7525187 | 290.096237  |                |
| 506.2835867                                                                                            | -0.801825021 | 0.002011105 | 0.018234719 | PELI3          |
| 11                                                                                                     | 66466327     | 66477337    | + 3926      |                |
| protein_coding pellino E3 ubiquitin protein ligase family member 3 [Source:HGNC Symbol;Acc:HGNC:30010] | -            |             |             |                |
| 463                                                                                                    | 453          | 652         | 3.008833589 | 4.64926182     |
| 2.855403756                                                                                            | 5.702061699  | 5.028130079 | 7.752527872 |                |
| ENSG00000168917                                                                                        | 301.9669974  | 255.8385149 | 216.09345   |                |
| 144.659264                                                                                             | 162.6670582  | 81.44088812 | 257.9663207 |                |
| 129.5890701                                                                                            | 0.99173586   | 0.002012296 | 0.018234719 |                |
| SLC35G2 3                                                                                              | 136818647    | 136855892   | + 4287      |                |
| protein_coding solute carrier family 35 member G2 [Source:HGNC Symbol;Acc:HGNC:28480]                  | -            |             |             |                |
| 83                                                                                                     | 3.329520832  | 261 276     | 221 144     | 178            |
| 1.624090497                                                                                            | 1.809360548  | 2.8385043   | 2.38803807  |                |
| ENSG00000065802                                                                                        | 1735.442514  | 0.903796478 |             |                |
| 2315.552802                                                                                            | 1982.162074  | 1615.675838 | 1515.587545 |                |
| 2194.32194                                                                                             | -0.435931735 | 2285.250945 | 1622.235299 |                |
| 2                                                                                                      | 238426742    | 0.002029378 | 0.018371092 | ASB1           |
| protein_coding ankyrin repeat and SOCS box containing 1 [Source:HGNC Symbol;Acc:HGNC:16011]            | -            |             |             |                |
| 2329                                                                                                   | 11.07051345  | 1500 1743   | 1550 2305   | 2169           |
| 15.04021132                                                                                            | 12.7555721   | 10.37082097 | 9.689825275 |                |
| ENSG00000070371                                                                                        | 325.1062309  | 14.67227021 |             |                |
| 100.4578222                                                                                            | 189.1689946  | 325.3598504 | 328.5402678 |                |
|                                                                                                        |              | 223.7171384 | 326.3354497 |                |

|                                 |                                                    |                        |                |        |
|---------------------------------|----------------------------------------------------|------------------------|----------------|--------|
| 171.1146518                     | 0.93070056                                         | 0.002029749            | 0.018371092    | CLTCL1 |
| 22                              | 19179473                                           | 19291716               | - 10049        |        |
| protein_coding                  | clathrin heavy chain like 1                        | [Source:HGNC           |                |        |
| Symbol;Acc:HGNC:2093]           | -                                                  | 281 351                | 336 100        | 207    |
| 228                             | 1.529248934                                        | 1.539991161            | 1.548883977    |        |
| 0.481147651                     | 0.897648061                                        | 1.05915138             |                |        |
| ENSG0000088899                  | 85.615164                                          | 234.5186386            | 214.1378531    |        |
| 311.4192488                     | 344.5251738                                        | 436.6409062            | 178.0905519    |        |
| 364.1951096                     | -1.028513261                                       | 0.002032161            | 0.018382038    | LZTS3  |
| 20                              | 3162617 3173592                                    | - 5395                 | protein_coding |        |
| leucine zipper tumor suppressor | family member 3                                    | [Source:HGNC           |                |        |
| Symbol;Acc:HGNC:30139]          | -                                                  | 74 253                 | 219 310        | 377    |
| 445                             | 0.750127321                                        | 2.067583369            | 1.880421126    |        |
| 2.778250885                     | 3.045148658                                        | 3.850477569            |                |        |
| ENSG00000149636                 | 741.6124341                                        | 637.7423849            | 678.5921008    |        |
| 412.8816493                     | 522.7278499                                        | 435.6596906            | 685.9823066    |        |
| 457.0897299                     | 0.584719203                                        | 0.002038               | 0.018423953    | DSN1   |
| 20                              | 36751791                                           | 36773818               | - 2739         |        |
| protein_coding                  | "DSN1 homolog, MIS12 kinetochore complex component |                        |                |        |
| [Source:HGNC                    | Symbol;Acc:HGNC:16165]"                            | -                      | 641 688        | 694    |
| 411                             | 572 444                                            | 12.79854825            | 11.07465903    |        |
| 11.73734564                     | 7.255227017                                        | 9.100444267            | 7.567230688    |        |
| ENSG00000257243                 | 5.784808379                                        | 2.780853423            | 5.866790497    |        |
| 68.3113191                      | 27.41579632                                        | 10.79337071            | 4.810817433    |        |
| 35.50682871                     | -2.890808995                                       | 0.002041998            | 0.018449189    |        |
| AC020612.1                      | 12 49595148                                        | 49595688               | + 541          |        |
| processed_pseudogene            | Protein DJ-1 (PARK7)                               | pseudogene             | -              |        |
| 5                               | 3 6                                                | 68 30                  | 11 0.50543749  |        |
| 0.244488225                     | 0.513755449                                        | 6.077330627            | 2.416476563    |        |
| 0.949164433                     |                                                    |                        |                |        |
| ENSG00000161904                 | 1602.391921                                        | 2359.090653            | 1859.772588    |        |
| 2693.274213                     | 2991.977239                                        | 2563.916152            | 1940.418387    |        |
| 2749.722535                     | -0.502434321                                       | 0.002046841            | 0.018482017    | LEMD2  |
| 6                               | 33771202                                           | 33789136               | - 6788         |        |
| protein_coding                  | LEM domain containing 2                            | [Source:HGNC           |                |        |
| Symbol;Acc:HGNC:21244]          | -                                                  | 1385 2545              | 1902 2681      | 3274   |
| 2613                            | 11.15841867                                        | 16.53026862            | 12.97989367    |        |
| 19.09660639                     | 21.01819607                                        | 17.96981524            |                |        |
| ENSG00000167962                 | 1317.779349                                        | 1918.788862            | 1940.929856    |        |
| 2644.04988                      | 2312.97935                                         | 2463.832169            | 1725.832689    |        |
| 2473.620466                     | -0.518622756                                       | 0.002049276            | 0.01849308     | ZNF598 |
| 16                              | 1997654 2009823                                    | - 4701                 | protein_coding | zinc   |
| finger protein 598              | [Source:HGNC                                       | Symbol;Acc:HGNC:28079] | -              | 1139   |
| 2070                            | 1985 2632                                          | 2531 2511              | 13.25037549    |        |
| 19.4139565                      | 19.56017409                                        | 27.07053571            | 23.4617548     |        |
| 24.93460526                     |                                                    |                        |                |        |
| ENSG00000170385                 | 1155.804714                                        | 1368.179884            | 1385.540356    |        |
| 895.0791958                     | 984.227088                                         | 926.2674504            | 1303.174985    |        |
| 935.1912447                     | 0.479049248                                        | 0.002055569            | 0.018538929    |        |
| SLC30A1 1                       | 211571568                                          | 211578742              | - 5474         |        |

|                                      |                                                     |             |             |             |      |        |
|--------------------------------------|-----------------------------------------------------|-------------|-------------|-------------|------|--------|
| protein_coding                       | solute carrier family 30 member 1 [Source:HGNC      |             |             |             |      |        |
| Symbol;Acc:HGNC:11012]               | -                                                   | 999         | 1476        | 1417        | 891  | 1077   |
| 944                                  | 9.980571446                                         | 11.88818411 | 11.99133437 |             |      |        |
| 7.869989038                          | 8.57372418                                          | 8.050321727 |             |             |      |        |
| ENSG00000135298                      | 56.69112211                                         | 63.03267758 | 81.15726854 |             |      |        |
| 30.13734666                          | 1.827719755                                         | 8.830939675 | 66.96035608 |             |      |        |
| 13.5986687                           | 2.307463545                                         | 0.002057331 | 0.018543879 |             |      | ADGRB3 |
| 6                                    | 68635367                                            | 69389511    | +           | 6490        |      |        |
| protein_coding                       | adhesion G protein-coupled receptor B3 [Source:HGNC |             |             |             |      |        |
| Symbol;Acc:HGNC:945]                 | -                                                   | 49          | 68          | 83          | 30   | 2      |
| 9                                    | 0.412901153                                         | 0.461953406 | 0.592428375 |             |      |        |
| 0.223500127                          | 0.013429007                                         | 0.0647357   |             |             |      |        |
| ENSG00000197381                      | 598.1491863                                         | 630.3267758 | 595.4792354 |             |      |        |
| 1049.784242                          | 774.0393162                                         | 857.582364  | 607.9850659 |             |      |        |
| 893.8019741                          | -0.55545543                                         | 0.002060671 | 0.018545111 |             |      | ADARB1 |
| 21                                   | 45073853                                            | 45226560    | +           | 10049       |      |        |
| protein_coding                       | "adenosine deaminase, RNA specific B1 [Source:HGNC  |             |             |             |      |        |
| Symbol;Acc:HGNC:226]"                | -                                                   | 517         | 680         | 609         | 1045 | 847    |
| 874                                  | 2.813600352                                         | 2.98345866  | 2.807352208 |             |      |        |
| 5.027992957                          | 3.67298506                                          | 4.060080292 |             |             |      |        |
| ENSG00000139083                      | 814.5010197                                         | 710.0445739 | 948.4644637 |             |      |        |
| 641.9254839                          | 518.1585505                                         | 452.3403545 | 824.3366858 |             |      |        |
| 537.4747963                          | 0.617148387                                         | 0.002060912 | 0.018545111 |             |      | ETV6   |
| 12                                   | 11649854                                            | 11895402    | +           | 7075        |      |        |
| protein_coding                       | ETS variant 6 [Source:HGNC Symbol;Acc:HGNC:3495]    |             |             |             |      |        |
| ETS                                  | 704                                                 | 766         | 970         | 639         | 567  | 461    |
| 5.441779342                          | 4.773492927                                         | 6.351082378 | 4.366923967 |             |      |        |
| 3.4923295                            | 3.041728991                                         |             |             |             |      |        |
| ENSG00000147536                      | 861.9364484                                         | 725.8027433 | 996.3765861 |             |      |        |
| 460.0968257                          | 617.7692771                                         | 613.2596997 | 861.3719259 |             |      |        |
| 563.7086008                          | 0.611203776                                         | 0.002061107 | 0.018545111 |             |      | GINS4  |
| 8                                    | 41529206                                            | 41545046    | +           | 5475        |      |        |
| protein_coding                       | GINS complex subunit 4 [Source:HGNC                 |             |             |             |      |        |
| Symbol;Acc:HGNC:28226]               | -                                                   | 745         | 783         | 1019        | 458  | 676    |
| 625                                  | 7.44160925                                          | 6.305384815 | 8.621692242 |             |      |        |
| 4.044665131                          | 5.380481843                                         | 5.328953488 |             |             |      |        |
| ENSG00000157423                      | 16.19746346                                         | 46.34755704 | 15.64477466 |             |      |        |
| 93.42577465                          | 82.24738897                                         | 79.47845708 | 26.06326505 |             |      |        |
| 85.05054023                          | -1.697755241                                        | 0.002074894 | 0.018658181 |             |      | HYDIN  |
| 16                                   | 70807378                                            | 71230722    | -           | 23408       |      |        |
| protein_coding                       | "HYDIN, axonemal central pair apparatus protein     |             |             |             |      |        |
| [Source:HGNC Symbol;Acc:HGNC:19368]" | -                                                   |             | 14          | 50          |      | 16     |
| 93                                   | 90                                                  | 81          | 0.032708335 | 0.094175873 |      |        |
| 0.031663442                          | 0.192096679                                         | 0.167547055 | 0.161535041 |             |      |        |
| ENSG00000134954                      | 3724.259634                                         | 2854.082563 | 3460.428595 |             |      |        |
| 2465.234957                          | 2641.968906                                         | 2238.1526   | 3346.256931 |             |      |        |
| 2448.452154                          | 0.450353442                                         | 0.002077828 | 0.018671411 |             |      | ETS1   |
| 11                                   | 128458761                                           | 128587558   | -           | 7149        |      |        |
| protein_coding                       | "ETS proto-oncogene 1, transcription factor         |             |             |             |      |        |
| [Source:HGNC Symbol;Acc:HGNC:3488]"  | ETS                                                 |             | 3219        | 3079        |      | 3539   |

|  |                                                       |                                                        |           |             |                |             |
|--|-------------------------------------------------------|--------------------------------------------------------|-----------|-------------|----------------|-------------|
|  | 2454                                                  | 2891                                                   | 2281      | 24.62466848 | 18.98883627    |             |
|  | 22.93177761                                           | 16.59703378                                            |           | 17.62225139 | 14.89450327    |             |
|  | ENSG00000143924                                       | 1548.014722                                            |           | 1425.650855 | 1500.920569    |             |
|  | 1119.100139                                           | 1109.425891                                            |           | 1082.280718 | 1491.528715    |             |
|  | 1103.602249                                           | 0.434366443                                            |           | 0.002079927 | 0.018671411    | EML4        |
|  | 2                                                     | 42169350                                               |           | 42332548    | + 8357         |             |
|  | protein_coding                                        | echinoderm microtubule associated protein like 4       |           |             |                |             |
|  | [Source:HGNC Symbol;Acc:HGNC:1316]                    |                                                        |           | -           | 1338 1538      | 1535        |
|  | 1114                                                  | 1214                                                   | 1103      | 8.755892563 | 8.114091322    |             |
|  | 8.508645571                                           | 6.445194164                                            |           | 6.330337754 | 6.161282842    |             |
|  | ENSG00000113594                                       | 472.0403637                                            |           | 329.9946061 | 548.5449115    |             |
|  | 303.3826231                                           | 272.3302435                                            |           | 188.3933797 | 450.1932938    |             |
|  | 254.7020821                                           | 0.821253131                                            |           | 0.00208003  | 0.018671411    | LIFR        |
|  | 5                                                     | 38474963                                               |           | 38608354    | - 11864        |             |
|  | protein_coding                                        | LIF receptor alpha [Source:HGNC Symbol;Acc:HGNC:6597]  |           |             |                |             |
|  | -                                                     | 408                                                    | 356       | 561 302     | 298 192        |             |
|  | 1.880718245                                           | 1.322978596                                            |           | 2.19045421  | 1.230770339    |             |
|  | 1.094570461                                           | 0.755468093                                            |           |             |                |             |
|  | ENSG00000246859                                       | 135.3645161                                            |           | 88.98730952 | 111.4690194    |             |
|  | 65.29758443                                           | 25.58807657                                            |           | 31.39889662 | 111.9402817    |             |
|  | 40.76151921                                           | 1.458857129                                            |           | 0.002081878 | 0.018677036    |             |
|  | STAR4-AS1                                             | 5                                                      | 111512226 | 111739726   | +              | 5647        |
|  | antisense                                             | STAR4 antisense RNA 1 [Source:HGNC                     |           |             |                |             |
|  | Symbol;Acc:HGNC:44117]                                | -                                                      | 117       | 96          | 114 65         | 28          |
|  | 32                                                    | 1.133085773                                            |           | 0.749527209 | 0.935167746    |             |
|  | 0.556540515                                           | 0.216072174                                            |           | 0.264532007 |                |             |
|  | ENSG00000267786                                       | 0                                                      | 0         | 0.977798416 | 25.11445555    |             |
|  | 7.310879019                                           | 12.75580175                                            |           | 0.325932805 |                |             |
|  | 15.06037877                                           | -5.369414145                                           |           | 0.002082919 | 1              | AF038458.3  |
|  | 19                                                    | 35947115                                               |           | 35959192    | + 500          |             |
|  | lincRNA novel transcript                              |                                                        |           | - 0         | 0              | 1 25        |
|  | 8                                                     | 13                                                     | 0         | 0           | 0.092647233    | 2.417526375 |
|  | 0.697234038                                           | 1.213722446                                            |           |             |                |             |
|  | ENSG00000076924                                       | 2023.525971                                            |           | 2010.557024 | 1799.149086    |             |
|  | 2570.71567                                            | 2570.687835                                            |           | 2557.047644 | 1944.410694    |             |
|  | 2566.150383                                           | -0.400385326                                           |           | 0.002086963 | 0.018711673    | XAB2        |
|  | 19                                                    | 7619525 7629565                                        | -         | 4673        | protein_coding | XPA         |
|  | binding protein 2 [Source:HGNC Symbol;Acc:HGNC:14089] |                                                        |           | -           |                | 1749        |
|  | 2169                                                  | 1840 2559                                              |           | 2813 2606   | 20.46862838    |             |
|  | 20.46433935                                           | 18.23998588                                            |           | 26.47742347 | 26.23206917    |             |
|  | 26.03302684                                           |                                                        |           |             |                |             |
|  | ENSG00000161692                                       | 311.2226908                                            |           | 443.0826453 | 622.8575911    |             |
|  | 294.3414191                                           | 217.4986508                                            |           | 259.0408971 | 459.0543091    |             |
|  | 256.9603223                                           | 0.838697875                                            |           | 0.002088282 | 0.018712526    | DBF4B       |
|  | 17                                                    | 44708608                                               |           | 44752264    | + 7146         |             |
|  | protein_coding                                        | DBF4 zinc finger B [Source:HGNC Symbol;Acc:HGNC:17883] |           |             |                |             |
|  | -                                                     | 269                                                    | 478       | 637 293     | 238 264        |             |
|  | 2.058656941                                           | 2.949163449                                            |           | 4.129323201 | 1.982466353    |             |
|  | 1.451351289                                           | 1.724594318                                            |           |             |                |             |
|  | ENSG00000086544                                       | 531.0454092                                            |           | 510.7500786 | 425.342311     |             |

|                                     |                                                     |             |             |        |
|-------------------------------------|-----------------------------------------------------|-------------|-------------|--------|
| 746.401619                          | 797.799673                                          | 648.5834584 | 489.0459329 |        |
| 730.9282501                         | -0.58039882                                         | 0.002095974 | 0.018770444 | ITPKC  |
| 19                                  | 40717103                                            | 40740860    | + 3385      |        |
| protein_coding                      | inositol-trisphosphate 3-kinase C [Source:HGNC      |             |             |        |
| Symbol;Acc:HGNC:14897]              | -                                                   | 459 551     | 435 743     | 873    |
| 661                                 | 7.415641484                                         | 7.176734563 | 5.952961033 |        |
| 10.61283366                         | 11.23865057                                         | 9.115674777 |             |        |
| ENSG00000279713                     | 28.92404189                                         | 21.31987624 | 44.00092873 | 0      |
| 8.224738897                         | 0.981215519                                         | 31.41494895 | 3.068651472 |        |
| 3.334338918                         | 0.002101009                                         | 0.018804518 | AC080038.3  |        |
| 17                                  | 62679403                                            | 62681354    | - 1952      | TEC    |
| TEC                                 | - 25                                                | 23 45       | 0 9         | 1      |
| 0.700414145                         | 0.519495728                                         | 1.067911237 | 0           |        |
| 0.200919132                         | 0.023914771                                         |             |             |        |
| ENSG00000169217                     | 1844.196911                                         | 2309.035292 | 2172.668081 |        |
| 2711.356621                         | 2916.126869                                         | 2883.792412 | 2108.633428 |        |
| 2837.091967                         | -0.427697192                                        | 0.00211035  | 0.018877074 | CD2BP2 |
| 16                                  | 30350766                                            | 30355361    | - 3773      |        |
| protein_coding                      | CD2 cytoplasmic tail binding protein 2 [Source:HGNC |             |             |        |
| Symbol;Acc:HGNC:1656]               | -                                                   | 1594 2491   | 2222 2699   | 3191   |
| 2939                                | 23.10448139                                         | 29.10857065 | 27.28096354 |        |
| 34.58735057                         | 36.8551851                                          | 36.36292554 |             |        |
| ENSG00000144021                     | 3078.675019                                         | 3000.540843 | 2910.905885 |        |
| 3632.554851                         | 4124.249627                                         | 3956.260975 | 2996.707249 |        |
| 3904.355151                         | -0.381835807                                        | 0.002113078 | 0.01889042  | CIA01  |
| 2                                   | 96266132                                            | 96273349    | + 4031      |        |
| protein_coding                      | cytosolic iron-sulfur assembly component 1          |             |             |        |
| [Source:HGNC Symbol;Acc:HGNC:14280] | -                                                   |             | 2661 3237   | 2977   |
| 3616                                | 4513 4032                                           | 36.10162819 | 35.40493971 |        |
| 34.21121453                         | 43.37273813                                         | 48.78778858 | 46.69321321 |        |
| ENSG00000168916                     | 232.5492968                                         | 98.25682093 | 309.9620979 |        |
| 131.5997471                         | 44.77913399                                         | 65.7414398  | 213.5894052 |        |
| 80.70677363                         | 1.405142955                                         | 0.002121719 | 0.018956582 | ZNF608 |
| 5                                   | 124636913                                           | 124748807   | - 6922      |        |
| protein_coding                      | zinc finger protein 608 [Source:HGNC                |             |             |        |
| Symbol;Acc:HGNC:29238]              | -                                                   | 201 106     | 317 131     | 49     |
| 67                                  | 1.588031728                                         | 0.675162369 | 2.121436922 |        |
| 0.915041766                         | 0.308477209                                         | 0.451844753 |             |        |
| ENSG00000181027                     | 490.5517505                                         | 648.8657986 | 933.7974874 |        |
| 1315.997471                         | 904.7212786                                         | 1160.77796  | 691.0716788 |        |
| 1127.16557                          | -0.704711703                                        | 0.002123886 | 0.018964863 | FKRP   |
| 19                                  | 46746046                                            | 46776988    | + 5081      |        |
| protein_coding                      | fukutin related protein [Source:HGNC                |             |             |        |
| Symbol;Acc:HGNC:17997]              | -                                                   | 424 700     | 955 1310    | 990    |
| 1183                                | 4.563639962                                         | 6.074112105 | 8.706761185 |        |
| 12.46589077                         | 8.490721527                                         | 10.86879971 |             |        |
| ENSG00000184205                     | 319.3214225                                         | 361.5109449 | 275.7391534 |        |
| 486.2158595                         | 430.4280023                                         | 646.6210273 | 318.8571736 |        |
| 521.0882964                         | -0.70811174                                         | 0.002125606 | 0.018967242 | TSPYL2 |
| X                                   | 53082367                                            | 53088540    | + 4948      |        |

|                                                                |                                                        |             |                          |       |             |                |             |
|----------------------------------------------------------------|--------------------------------------------------------|-------------|--------------------------|-------|-------------|----------------|-------------|
| protein_coding                                                 | TSPY like 2 [Source:HGNC Symbol;Acc:HGNC:24358] -      |             |                          |       |             |                |             |
|                                                                | 276                                                    | 390         | 282                      | 484   | 471         | 659            | 3.050521596 |
|                                                                | 3.475112544                                            |             | 2.640109095              |       | 4.729518049 |                | 4.148105696 |
|                                                                | 6.217299081                                            |             |                          |       |             |                |             |
| ENSG00000268001                                                | 123.7948993                                            |             | 135.3348666              |       | 85.06846221 |                |             |
| 197.9019097                                                    | 217.4986508                                            |             | 247.2663109              |       | 114.7327427 |                |             |
| 220.8889572                                                    | -0.94536973                                            |             | 0.002126634              |       | 0.018967242 |                | CARD8-      |
| AS1                                                            | 19                                                     | 48255675    | 48258199                 |       | +           | 1969           |             |
| antisense                                                      | CARD8 antisense RNA 1 [Source:HGNC                     |             |                          |       |             |                |             |
| Symbol;Acc:HGNC:51408]                                         | -                                                      | 107         | 146                      | 87    | 197         | 238            |             |
|                                                                | 252                                                    | 2.971890299 | 3.269197044              |       | 2.046802752 |                |             |
| 4.837508337                                                    | 5.267321641                                            |             | 5.974490302              |       |             |                |             |
| ENSG00000142156                                                | 28193.99908                                            |             | 21452.43025              |       | 40721.39284 |                |             |
| 12548.18657                                                    | 13236.34646                                            |             | 18806.95786              |       | 30122.60739 |                |             |
| 14863.8303                                                     | 1.019040674                                            |             | 0.002128743              |       | 0.018974982 |                | COL6A1      |
|                                                                | 21                                                     | 45981737    | 46005050                 |       | +           | 5343           |             |
| protein_coding                                                 | collagen type VI alpha 1 chain [Source:HGNC            |             |                          |       |             |                |             |
| Symbol;Acc:HGNC:2211]                                          | -                                                      | 24369       | 23143                    | 41646 | 12491       | 14484          |             |
|                                                                | 19167                                                  | 249.4291728 | 190.9714472              |       | 361.0693103 |                |             |
| 113.0350812                                                    | 118.1304721                                            |             | 167.4615106              |       |             |                |             |
| ENSG00000261212                                                | 10.41265508                                            |             | 14.83121825              |       | 7.822387329 |                | 0           |
|                                                                | 0                                                      | 11.02208689 | 0                        |       | 5.955919058 |                |             |
| 0.002129115                                                    | 1                                                      | AC234778.2  | X                        |       | 141173235   |                |             |
| 141173588                                                      | -                                                      | 354         | lincRNA novel transcript |       |             |                | -           |
|                                                                | 9                                                      | 16          | 8                        | 0     | 0           | 1.390381435    |             |
|                                                                | 1.992740184                                            | 1.046861386 | 0                        | 0     | 0           | 0              |             |
| ENSG00000205609                                                | 711.5314306                                            |             | 121.4305995              |       | 787.127725  |                |             |
| 143.6546857                                                    | 55.74545252                                            |             | 85.36575019              |       | 540.0299183 |                |             |
| 94.92196282                                                    | 2.50845686                                             |             | 0.002132342              |       | 0.018995987 |                | EIF3CL      |
|                                                                | 16                                                     | 28379579    | 28403879                 |       | -           | 3091           |             |
| protein_coding                                                 | eukaryotic translation initiation factor 3 subunit C   |             |                          |       |             |                |             |
| like [Source:HGNC Symbol;Acc:HGNC:26347]                       | -                                                      | 615         | 131                      |       |             |                |             |
|                                                                | 805                                                    | 143         | 61                       | 87    | 10.88105044 | 1.868556562    |             |
|                                                                | 12.0642223                                             | 2.236857144 | 0.859982132              |       | 1.313912013 |                |             |
| ENSG00000132275                                                | 748.5542042                                            |             | 865.7723656              |       | 840.9066379 |                |             |
| 1330.061566                                                    | 1158.774325                                            |             | 1022.426571              |       | 818.4110692 |                |             |
| 1170.420821                                                    | -0.515531448                                           |             | 0.002141254              |       | 0.019064266 |                | RRP8        |
|                                                                | 11                                                     | 6595075     | 6603620                  | -     | 6922        | protein_coding |             |
| ribosomal RNA processing 8 [Source:HGNC Symbol;Acc:HGNC:29030] | -                                                      |             |                          |       |             |                |             |
|                                                                | 647                                                    | 934         | 860                      | 1324  | 1268        | 1042           | 5.111724021 |
|                                                                | 5.949072194                                            | 5.755317831 | 9.248208379              |       | 7.982634713 |                |             |
|                                                                | 7.027197504                                            |             |                          |       |             |                |             |
| ENSG00000138668                                                | 6263.790512                                            |             | 7119.911713              |       | 7573.048733 |                |             |
| 5315.223373                                                    | 4449.583743                                            |             | 5782.303056              |       | 6985.583653 |                |             |
| 5182.370057                                                    | 0.430929064                                            |             | 0.002144221              |       | 0.019079574 |                | HNRNPD      |
|                                                                | 4                                                      | 82352498    | 82374503                 |       | -           | 6981           |             |
| protein_coding                                                 | heterogeneous nuclear ribonucleoprotein D [Source:HGNC |             |                          |       |             |                |             |
| Symbol;Acc:HGNC:5036]                                          | -                                                      | 5414        | 7681                     | 7745  | 5291        | 4869           |             |
|                                                                | 5893                                                   | 42.41264195 | 48.51031392              |       | 51.39326864 |                |             |
| 36.64555808                                                    | 30.39350137                                            |             | 39.40622556              |       |             |                |             |



|                                                       |                                                |             |                  |        |
|-------------------------------------------------------|------------------------------------------------|-------------|------------------|--------|
| ENSG00000135686                                       | 1089.857899                                    | 1112.341369 | 1167.491309      |        |
| 1699.746352                                           | 1397.291753                                    | 1530.69621  | 1123.230192      |        |
| 1542.578105                                           | -0.457391357                                   | 0.002151009 | 0.019128835      | KLHL36 |
| 16                                                    | 84648525                                       | 84667686    | + 9995           |        |
| protein_coding                                        | kelch like family member 36 [Source:HGNC       |             |                  |        |
| Symbol;Acc:HGNC:17844]                                | -                                              | 942 1200    | 1194 1692        | 1529   |
| 1560                                                  | 5.154218401                                    | 5.293371875 | 5.533806691      |        |
| 8.185001753                                           | 6.66627591                                     | 7.285977667 |                  |        |
| ENSG00000105928                                       | 1465.870443                                    | 1495.17219  | 1199.758657      |        |
| 2249.250639                                           | 1794.820799                                    | 1804.45534  | 1386.933763      |        |
| 1949.508926                                           | -0.491206951                                   | 0.002154197 | 0.019146051      | GSDME  |
| 7                                                     | 24698351                                       | 24758113    | - 8843           |        |
| protein_coding                                        | gasdermin E [Source:HGNC Symbol;Acc:HGNC:2810] |             |                  | -      |
| 1267                                                  | 1613 1227                                      | 2239 1964   | 1839 7.835589987 |        |
| 8.042085765                                           | 6.427578561                                    | 12.2420933  | 9.678330671      |        |
| 9.707963617                                           |                                                |             |                  |        |
| ENSG00000196371                                       | 417.6631649                                    | 396.7350883 | 443.9204809      |        |
| 700.1910208                                           | 551.971366                                     | 640.7337342 | 419.4395781      |        |
| 630.9653736                                           | -0.588862869                                   | 0.002158811 | 0.019175914      | FUT4   |
| 11                                                    | 94543840                                       | 94549898    | + 6059           |        |
| protein_coding                                        | fucosyltransferase 4 [Source:HGNC              |             |                  |        |
| Symbol;Acc:HGNC:4015]                                 | -                                              | 361 428     | 454 697          | 604    |
| 653                                                   | 3.258374229                                    | 3.114417095 | 3.471021919      |        |
| 5.562026351                                           | 4.344047685                                    | 5.031045727 |                  |        |
| ENSG00000120334                                       | 642.11373                                      | 440.3017919 | 635.5689705      |        |
| 318.4512964                                           | 434.9973016                                    | 268.8530523 | 572.6614975      |        |
| 340.7672168                                           | 0.747573647                                    | 0.002162091 | 0.019193894      | CENPL  |
| 1                                                     | 173799550                                      | 173824720   | - 4914           |        |
| protein_coding                                        | centromere protein L [Source:HGNC              |             |                  |        |
| Symbol;Acc:HGNC:17879]                                | -                                              | 555 475     | 650 317          | 476    |
| 274                                                   | 6.176643614                                    | 4.261793625 | 6.127462475      |        |
| 3.119071472                                           | 4.221146239                                    | 2.602923753 |                  |        |
| ENSG00000160097                                       | 41.65062033                                    | 11.12341369 | 16.62257307      | 0      |
| 0                                                     | 3.924862078                                    | 23.13220236 | 1.308287359      |        |
| 4.150671079                                           | 0.002166007                                    | 0.019217496 | FNDC5 1          |        |
| 32862268                                              | 32872482                                       | - 3139      | protein_coding   |        |
| fibronectin type III domain containing 5 [Source:HGNC |                                                |             |                  |        |
| Symbol;Acc:HGNC:20240]                                | -                                              | 36 12       | 17 0             | 0      |
| 4                                                     | 0.627199781                                    | 0.168548111 | 0.250876546      | 0      |
| 0                                                     | 0.059485992                                    |             |                  |        |
| ENSG00000126001                                       | 1723.872897                                    | 1466.436705 | 1570.344256      |        |
| 2794.736614                                           | 1793.906939                                    | 2287.213376 | 1586.884619      |        |
| 2291.95231                                            | -0.53045642                                    | 0.002172389 | 0.019262939      | CEP250 |
| 20                                                    | 35455164                                       | 35519280    | + 16295          |        |
| protein_coding                                        | centrosomal protein 250 [Source:HGNC           |             |                  |        |
| Symbol;Acc:HGNC:1859]                                 | -                                              | 1490 1582   | 1606 2782        | 1963   |
| 2331                                                  | 5.000651812                                    | 4.280416922 | 4.565555557      |        |
| 8.254750996                                           | 5.249579687                                    | 6.677808253 |                  |        |
| ENSG00000186716                                       | 750.8681275                                    | 855.575903  | 968.020432       |        |
| 1266.773138                                           | 1127.703089                                    | 1253.993434 | 858.1548208      |        |

|                                             |                                                                                |             |             |                |
|---------------------------------------------|--------------------------------------------------------------------------------|-------------|-------------|----------------|
| 1216.156554                                 | -0.502264907                                                                   | 0.002186374 | 0.019375705 | BCR            |
| 22                                          | 23179704                                                                       | 23318037    | + 12389     |                |
| protein_coding                              | "BCR, RhoGEF and GTPase activating protein [Source:HGNC Symbol;Acc:HGNC:1014]" |             |             |                |
| 1261                                        | 1234                                                                           | 1278        | 2.86485837  | 3.284727951    |
| 3.701701521                                 | 4.921302379                                                                    | 4.340477452 | 4.815491679 |                |
| ENSG00000178860                             | 414.1922799                                                                    | 657.2083589 | 559.300694  |                |
| 838.8228154                                 | 881.8747817                                                                    | 783.0099845 | 543.5671109 |                |
| 834.5691939                                 | -0.6170627                                                                     | 0.002188949 | 0.019387289 | MSC            |
| 8                                           | 71841549                                                                       | 71844468    | - 2113      |                |
| protein_coding                              | musculin [Source:HGNC Symbol;Acc:HGNC:7321]                                    |             |             | bHLH           |
| 358                                         | 709                                                                            | 572         | 835         | 965            |
| 14.79383246                                 | 12.5400419                                                                     | 19.10681044 | 19.90152764 |                |
| 17.629883                                   |                                                                                |             |             |                |
| ENSG00000115594                             | 318.1644608                                                                    | 140.8965734 | 201.4264737 |                |
| 115.5264955                                 | 116.9740643                                                                    | 62.79779325 | 220.1625027 |                |
| 98.43278436                                 | 1.158828766                                                                    | 0.002203441 | 0.019504344 | IL1R1          |
| 2                                           | 102064544                                                                      | 102179874   | + 7083      |                |
| protein_coding                              | interleukin 1 receptor type 1 [Source:HGNC Symbol;Acc:HGNC:5993]               |             |             |                |
| 64                                          | 2.123294158                                                                    | 0.946150676 | 1.34726316  | 128            |
| 0.785021977                                 | 0.787501384                                                                    | 0.42180213  |             |                |
| ENSG00000285106                             | 119.1670526                                                                    | 136.2618177 | 74.31267963 |                |
| 232.0575693                                 | 217.4986508                                                                    | 201.1491815 | 109.91385   |                |
| 216.9018005                                 | -0.980769188                                                                   | 0.002216076 | 0.019604831 |                |
| AC016831.6                                  | 7                                                                              | 130791264   | 131110161   | - 11088        |
| lincRNA                                     | novel transcript                                                               |             |             |                |
| 231                                         | 238                                                                            | 205         | 0.508017555 | 0.58451825     |
| 0.317513965                                 | 1.007302656                                                                    | 0.935367633 | 0.863071309 |                |
| ENSG00000168140                             | 208.2531016                                                                    | 323.5059482 | 540.7225241 |                |
| 212.9705831                                 | 119.7156439                                                                    | 186.4309487 | 357.493858  |                |
| 173.0390586                                 | 1.048789122                                                                    | 0.002224549 | 0.019668407 | VASN           |
| 16                                          | 4371848                                                                        | 4383528     | + 2806      | protein_coding |
| vasorin [Source:HGNC Symbol;Acc:HGNC:18517] |                                                                                |             |             | - 180 349      |
| 553                                         | 212                                                                            | 131         | 190         | 3.508161282    |
| 9.129351326                                 | 3.652997801                                                                    | 2.034427542 | 3.160908833 |                |
| ENSG00000156860                             | 794.8326712                                                                    | 1712.078757 | 1678.879881 |                |
| 2079.47692                                  | 2252.664598                                                                    | 2444.207859 | 1395.26377  |                |
| 2258.783125                                 | -0.694200099                                                                   | 0.002228033 | 0.019680549 | FBRS           |
| 16                                          | 30658431                                                                       | 30670814    | + 7218      |                |
| protein_coding                              | fibrosin [Source:HGNC Symbol;Acc:HGNC:20442]                                   |             |             | -              |
| 687                                         | 1847                                                                           | 1717        | 2070        | 2465           |
| 11.28194494                                 | 11.01934736                                                                    | 13.86611138 | 14.88190897 |                |
| 16.11027247                                 |                                                                                |             |             |                |
| ENSG00000112137                             | 98.34174244                                                                    | 104.7454789 | 61.60130022 |                |
| 228.0392564                                 | 150.7868798                                                                    | 176.6187935 | 88.22950719 |                |
| 185.1483099                                 | -1.069434398                                                                   | 0.002228497 | 0.019680549 |                |
| PHACTR1                                     | 6                                                                              | 12716805    | 13290484    | + 11198        |
| protein_coding                              | phosphatase and actin regulator 1 [Source:HGNC Symbol;Acc:HGNC:20990]          |             |             |                |
|                                             | -                                                                              | 85          | 113         | 63             |
|                                             |                                                                                |             | 227         | 165            |

|                        |                                                      |             |             |           |
|------------------------|------------------------------------------------------|-------------|-------------|-----------|
| 180                    | 0.415119539                                          | 0.444909765 | 0.26061688  |           |
| 0.980136608            | 0.642099126                                          | 0.750374519 |             |           |
| ENSG00000185896        | 4946.011164                                          | 5139.017125 | 6816.232759 |           |
| 4548.730189            | 3295.378718                                          | 4105.405733 | 5633.753683 |           |
| 3983.171547            | 0.500348837                                          | 0.002247451 | 0.019836482 | LAMP1     |
| 13                     | 113297241                                            | 113323672   | + 5739      |           |
| protein_coding         | lysosomal associated membrane protein 1 [Source:HGNC |             |             |           |
| Symbol;Acc:HGNC:6499]  | -                                                    | 4275 5544   | 6971 4528   | 3606      |
| 4184                   | 40.73752191                                          | 42.59130576 | 56.26797862 |           |
| 38.14796802            | 27.38092372                                          | 34.03309821 |             |           |
| ENSG00000139343        | 1005.399696                                          | 954.7596751 | 1070.689266 |           |
| 550.5088657            | 720.1215834                                          | 788.8972777 | 1010.282879 |           |
| 686.5092422            | 0.557139644                                          | 0.002252282 | 0.019867651 | SNRPF     |
| 12                     | 95858928                                             | 95903828    | + 3043      |           |
| protein_coding         | small nuclear ribonucleoprotein polypeptide F        |             |             |           |
| [Source:HGNC           | Symbol;Acc:HGNC:11162]                               |             |             |           |
| 548                    | 788 804                                              | 15.61753676 | 14.92344984 | 1095      |
| 16.66919483            | 8.707226114                                          | 11.28451408 | 12.33389174 |           |
| ENSG00000276023        | 1175.473063                                          | 1277.338672 | 953.3534558 |           |
| 1548.05504             | 1649.517079                                          | 1567.001185 | 1135.388397 |           |
| 1588.191101            | -0.484250173                                         | 0.002254738 | 0.019877845 | DUSP14    |
| 17                     | 37489831                                             | 37513501    | + 2499      |           |
| protein_coding         | dual specificity phosphatase 14 [Source:HGNC         |             |             |           |
| Symbol;Acc:HGNC:17007] | -                                                    | 1016 1378   | 975 1541    | 1805      |
| 1597                   | 22.23423362                                          | 24.31178909 | 18.07343974 |           |
| 29.81519122            | 31.47527606                                          | 29.83215974 |             |           |
| ENSG00000140374        | 1851.138681                                          | 1827.94765  | 1861.728184 |           |
| 1457.643               | 1392.722453                                          | 1302.072994 | 1846.938172 |           |
| 1384.146149            | 0.416142099                                          | 0.002259128 | 0.019897049 | ETFA      |
| 15                     | 76215355                                             | 76311472    | - 5031      |           |
| protein_coding         | electron transfer flavoprotein subunit alpha         |             |             |           |
| [Source:HGNC           | Symbol;Acc:HGNC:3481]                                |             |             |           |
| 1451                   | 1524 1327                                            | 17.39243456 | 17.28170356 | 1904      |
| 17.53133879            | 13.94486492                                          | 13.20046553 | 12.3129649  |           |
| ENSG00000204713        | 2037.409511                                          | 2275.665051 | 2427.873467 |           |
| 3251.819705            | 2879.572474                                          | 2870.055394 | 2246.982676 |           |
| 3000.482524            | -0.416875158                                         | 0.002259541 | 0.019897049 | TRIM27    |
| 6                      | 28903002                                             | 28923989    | - 7986      |           |
| protein_coding         | tripartite motif containing 27 [Source:HGNC          |             |             |           |
| Symbol;Acc:HGNC:9975]  | -                                                    | 1761 2455   | 2483 3237   | 3151      |
| 2925                   | 12.05937396                                          | 13.55364632 | 14.40289748 |           |
| 19.59812891            | 17.19403059                                          | 17.09789322 |             |           |
| ENSG00000123131        | 2269.958808                                          | 2259.906881 | 2458.185218 |           |
| 1846.414772            | 1407.344211                                          | 1820.154789 | 2329.350302 |           |
| 1691.304591            | 0.462060209                                          | 0.002260821 | 0.019897049 | PRDX4     |
| X                      | 23664262                                             | 23686399    | + 1904      |           |
| protein_coding         | peroxiredoxin 4 [Source:HGNC                         |             |             |           |
| Symbol;Acc:HGNC:17169] | -                                                    | 1962 2438   | 2514 1838   | 1540 1855 |
| 56.35426265            | 56.45477946                                          | 61.16469087 | 46.67451131 |           |
| 35.24620595            | 45.48026701                                          |             |             |           |

|                        |                                                        |             |             |                   |
|------------------------|--------------------------------------------------------|-------------|-------------|-------------------|
| ENSG00000188177        | 345.931541                                             | 318.8711925 | 249.3385961 |                   |
| 648.9575314            | 500.7952128                                            | 387.5801302 | 304.7137765 |                   |
| 512.4442915            | -0.750543118                                           | 0.002286427 | 0.020110823 | ZC3H6             |
| 2                      | 112275594                                              | 112340063   | + 11803     |                   |
| protein_coding         | zinc finger CCCH-type containing 6 [Source:HGNC        |             |             |                   |
| Symbol;Acc:HGNC:24762] | -                                                      | 299 344     | 255 646     | 548               |
| 395                    | 1.385394611                                            | 1.284990726 | 1.000806758 |                   |
| 2.646313713            | 2.023236956                                            | 1.562250687 |             |                   |
| ENSG00000083444        | 3953.338046                                            | 3759.713827 | 5439.492589 |                   |
| 2640.031567            | 2797.325085                                            | 3662.877534 | 4384.181487 |                   |
| 3033.411395            | 0.531434106                                            | 0.002288964 | 0.020121561 | PL0D1             |
| 1                      | 11934205                                               | 11975538    | + 5320      |                   |
| protein_coding         | "procollagen-lysine,2-oxoglutarate 5-dioxygenase 1     |             |             |                   |
| [Source:HGNC           | Symbol;Acc:HGNC:9081]"                                 | -           | 3417 4056   | 5563              |
| 2628                   | 3061 3733                                              | 35.12594842 | 33.6140059  |                   |
| 48.43952585            | 23.88443351                                            | 25.07323061 | 32.75611548 |                   |
| ENSG00000175643        | 430.3897434                                            | 432.8861828 | 394.0527617 |                   |
| 154.7050462            | 276.8995429                                            | 286.5149317 | 419.1095626 |                   |
| 239.3731736            | 0.807257297                                            | 0.002293754 | 0.020152082 | RMI2              |
| 16                     | 11249619                                               | 11381662    | + 3632      |                   |
| protein_coding         | RecQ mediated genome instability 2 [Source:HGNC        |             |             |                   |
| Symbol;Acc:HGNC:28349] | -                                                      | 372 467     | 403 154     | 303               |
| 292                    | 5.601338423                                            | 5.668980964 | 5.139982757 |                   |
| 2.050104965            | 3.635426649                                            | 3.753038741 |             |                   |
| ENSG00000171858        | 10959.89795                                            | 13980.27711 | 15966.47034 |                   |
| 15279.63476            | 20373.59211                                            | 22807.37353 | 13635.54847 |                   |
| 19486.8668             | -0.515076898                                           | 0.002295162 | 0.020152864 | RPS21             |
| 20                     | 62387116                                               | 62388520    | + 1023      |                   |
| protein_coding         | ribosomal protein S21 [Source:HGNC                     |             |             |                   |
| Symbol;Acc:HGNC:10409] | -                                                      | 9473 15082  | 16329 15210 | 22294             |
| 23244                  | 506.4150645                                            | 650.0058432 | 739.411858  |                   |
| 718.8773442            | 949.6661556                                            | 1060.672402 |             |                   |
| ENSG00000139405        | 581.9517229                                            | 758.2460332 | 679.5698992 |                   |
| 1198.461819            | 893.7549601                                            | 915.4740797 | 673.2558851 |                   |
| 1002.56362             | -0.573392771                                           | 0.002299098 | 0.020175834 | RITA1             |
| 12                     | 113185526                                              | 113192368   | + 2309      |                   |
| protein_coding         | RBPJ interacting and tubulin associated 1 [Source:HGNC |             |             |                   |
| Symbol;Acc:HGNC:25925] | -                                                      | 503 818     | 695 1193    | 978               |
| 933                    | 11.91348342                                            | 15.61936338 | 13.94322795 |                   |
| 24.98145487            | 18.45752731                                            | 18.86269518 |             |                   |
| ENSG00000245857        | 10.41265508                                            | 9.269511408 | 12.71137941 | 0                 |
| 0                      | 0                                                      | 10.79784863 | 0           | 5.925559174       |
| 0.002310813            | 1                                                      | GS1-24F4.2  | 8           | 6835554 6885276 + |
| 1433                   | lincRNA uncharacterized LOC100652791 [Source:NCBI      |             |             |                   |
| gene;Acc:100652791]    | -                                                      | 9 10        | 13 0        | 0                 |
| 0                      | 0.343471757                                            | 0.307671853 | 0.420242158 | 0                 |
| 0                      | 0                                                      |             |             |                   |
| ENSG00000132932        | 79.83035562                                            | 165.9242542 | 160.3589403 |                   |
| 339.547439             | 235.7758484                                            | 240.3978023 | 135.3711834 |                   |
| 271.9070299            | -1.002112145                                           | 0.002321427 | 0.020360102 | ATP8A2            |

|                        |                                    |             |              |       |             |
|------------------------|------------------------------------|-------------|--------------|-------|-------------|
| 13                     | 25372071                           | 26025851    | +            | 10415 |             |
| protein_coding         | ATPase phospholipid transporting   | 8A2         | [Source:HGNC |       |             |
| Symbol;Acc:HGNC:13533] | -                                  | 69          | 179          | 164   | 338 258     |
| 245                    | 0.362313511                        | 0.757753088 | 0.729435725  |       |             |
| 1.569128977            | 1.079491009                        | 1.098127698 |              |       |             |
| ENSG00000119335        | 9656.002146                        | 8631.769024 | 9834.69647   |       |             |
| 6725.651196            | 7903.97408                         | 6981.348421 | 9374.15588   |       |             |
| 7203.657899            | 0.379867924                        | 0.002350692 | 0.02060495   |       | SET         |
| 9                      | 128683424                          | 128696400   | +            | 4355  |             |
| protein_coding         | SET nuclear proto-oncogene         |             | [Source:HGNC |       |             |
| Symbol;Acc:HGNC:10760] | -                                  | 8346        | 9312         | 10058 | 6695 8649   |
| 7115                   | 104.8057074                        | 94.27331222 | 106.9857481  |       |             |
| 74.3299154             | 86.54387474                        | 76.26631817 |              |       |             |
| ENSG00000137504        | 1758.581747                        | 1853.902282 | 1983.952986  |       |             |
| 1467.688782            | 1290.370147                        | 1401.175762 | 1865.479005  |       |             |
| 1386.411564            | 0.428515682                        | 0.002354425 | 0.02062515   |       | CREBZF      |
| 11                     | 85659708                           | 85682908    | -            | 5587  |             |
| protein_coding         | CREB/ATF bZIP transcription factor |             | [Source:HGNC |       |             |
| Symbol;Acc:HGNC:24905] | TF_bZIP                            | 1520        | 2000         | 2029  | 1461 1412   |
| 1428                   | 14.87851644                        | 15.78284467 | 16.82309245  |       |             |
| 12.64365861            | 11.01322782                        | 11.93151446 |              |       |             |
| ENSG00000188483        | 370.2277362                        | 742.4878638 | 688.370085   |       |             |
| 1296.910485            | 919.3430367                        | 836.9768381 | 600.361895   |       |             |
| 1017.743453            | -0.75991315                        | 0.002355695 | 0.02062515   |       | IER5L       |
| 9                      | 129175552                          | 129178262   | -            | 2711  |             |
| protein_coding         | immediate early response 5 like    |             | [Source:HGNC |       |             |
| Symbol;Acc:HGNC:23679] | -                                  | 320         | 801          | 704   | 1291 1006   |
| 853                    | 6.45528132                         | 13.02677633 | 12.02944518  |       |             |
| 23.02490999            | 16.1706345                         | 14.68809759 |              |       |             |
| ENSG00000267296        | 1.156961676                        | 2.780853423 | 0.977798416  |       |             |
| 13.05951689            | 40.20983461                        | 11.77458623 | 1.638537838  |       |             |
| 21.68131258            | -3.709173022                       | 0.002360453 | 1            |       | CEBPA-DT    |
| 19                     | 33302857                           | 33305054    | +            | 2198  |             |
| antisense              | CEBPA divergent transcript         |             | [Source:HGNC |       |             |
| Symbol;Acc:HGNC:25710] | -                                  | 1           | 3            | 1     | 13 44       |
| 12                     | 0.024880954                        | 0.060176583 | 0.021075349  |       |             |
| 0.285967633            | 0.872335579                        | 0.254858776 |              |       |             |
| ENSG00000009307        | 26305.83762                        | 22618.53479 | 23525.82989  |       |             |
| 18118.57281            | 19602.29437                        | 18958.06505 | 24150.06743  |       |             |
| 18892.97741            | 0.354128822                        | 0.002365454 | 0.020698742  |       | CSDE1       |
| 1                      | 114716913                          | 114758676   | -            | 5778  |             |
| protein_coding         | cold shock domain containing E1    |             | [Source:HGNC |       |             |
| Symbol;Acc:HGNC:29905] | CSD                                | 22737       | 24401        | 24060 | 18036 21450 |
| 19321                  | 215.2039989                        | 186.1932984 | 192.8948094  |       |             |
| 150.9259456            | 161.7738632                        | 156.0982732 |              |       |             |
| ENSG00000117859        | 1685.693162                        | 1604.552425 | 1589.900225  |       |             |
| 1251.704465            | 1177.051522                        | 1217.68846  | 1626.71527   |       |             |
| 1215.481482            | 0.420359792                        | 0.002370274 | 0.020719347  |       | OSBPL9      |
| 1                      | 51577179                           | 51798427    | +            | 9523  |             |
| protein_coding         | oxysterol binding protein like 9   |             | [Source:HGNC |       |             |

|                         |                                                       |                                      |             |             |                |        |
|-------------------------|-------------------------------------------------------|--------------------------------------|-------------|-------------|----------------|--------|
| Symbol;Acc:HGNC:16386]  | -                                                     | 1457                                 | 1731        | 1626        | 1246           | 1288   |
| 1241                    | 8.367206362                                           | 8.014145842                          |             | 7.909503321 |                |        |
| 6.326237242             | 5.893871682                                           | 6.083367216                          |             |             |                |        |
| ENSG00000270441         | 6.941770054                                           | 16.68512054                          |             | 16.62257307 |                |        |
| 75.34336665             | 60.31475191                                           | 30.4176811                           |             | 13.41648789 |                |        |
| 55.35859989             | -2.03490504                                           | 0.00237052                           |             | 0.020719347 |                |        |
| AC135506.1              | 3                                                     | 49140086                             | 49160851    | -           |                | 1799   |
|                         | unprocessed_pseudogene                                | "laminin, beta 1 (LAMB1) pseudogene" |             |             |                |        |
| -                       | 6                                                     | 18                                   | 17          | 75          | 66             | 31     |
| 0.182395786             | 0.441138843                                           |                                      | 0.437744012 |             | 2.015725159    |        |
| 1.598716179             | 0.804408343                                           |                                      |             |             |                |        |
| ENSG00000180758         | 347.0885027                                           |                                      | 311.4555833 |             | 450.7650699    |        |
| 230.0484128             | 195.5660138                                           |                                      | 234.5105092 |             | 369.7697186    |        |
| 220.0416453             | 0.749355878                                           |                                      | 0.002380543 |             | 0.020795066    | GPR157 |
| 1                       | 9100305                                               | 9129170                              | -           | 5372        | protein_coding | G      |
| protein-coupled         | receptor 157 [Source:HGNC Symbol;Acc:HGNC:23687]      |                                      |             |             |                |        |
| -                       | 300                                                   | 336                                  | 461         | 229         | 214            | 239    |
| 3.054076867             | 2.75763785                                            |                                      | 3.975276828 |             | 2.061107743    |        |
| 1.735946622             | 2.076863399                                           |                                      |             |             |                |        |
| ENSG00000178966         | 708.0605455                                           |                                      | 506.1153229 |             | 612.1018085    |        |
| 345.5749084             | 443.2220405                                           |                                      | 382.6740526 |             | 608.7592257    |        |
| 390.4903338             | 0.63918845                                            |                                      | 0.002382188 |             | 0.020797553    | RMI1   |
| 9                       | 83980711                                              |                                      | 84004074    |             | +              | 3507   |
| protein_coding          | RecQ mediated genome instability 1 [Source:HGNC       |                                      |             |             |                |        |
| Symbol;Acc:HGNC:25764]  | -                                                     | 612                                  | 546         | 626         | 344            | 485    |
| 390                     | 9.543559138                                           |                                      | 6.864214318 |             | 8.268772116    |        |
| 4.742680769             | 6.026491807                                           |                                      | 5.191285057 |             |                |        |
| ENSG00000178878         | 385.268238                                            |                                      | 233.5916875 |             | 391.1193665    |        |
| 176.8057671             | 227.5511095                                           |                                      | 137.3701727 |             | 336.659764     |        |
| 180.5756831             | 0.896976443                                           |                                      | 0.002388258 |             | 0.020838637    | APOLD1 |
| 12                      | 12725917                                              |                                      | 12829975    |             | +              | 7243   |
| protein_coding          | apolipoprotein L domain containing 1 [Source:HGNC     |                                      |             |             |                |        |
| Symbol;Acc:HGNC:25268]  | -                                                     | 333                                  | 252         | 400         | 176            | 249    |
| 140                     | 2.514319485                                           |                                      | 1.533966989 |             | 2.558255768    |        |
| 1.174885108             | 1.498095363                                           |                                      | 0.902309617 |             |                |        |
| ENSG00000167987         | 868.8782185                                           |                                      | 1170.739291 |             | 1058.955685    |        |
| 1570.155761             | 1425.621409                                           |                                      | 1378.607805 |             | 1032.857731    |        |
| 1458.128325             | -0.496579436                                          |                                      | 0.002409657 |             | 0.021013368    | VPS37C |
| 11                      | 61130256                                              |                                      | 61161617    |             | -              | 3960   |
| protein_coding          | "VPS37C, ESCRT-I subunit [Source:HGNC                 |                                      |             |             |                |        |
| Symbol;Acc:HGNC:26097]" | -                                                     | 751                                  | 1263        | 1083        | 1563           | 1560   |
| 1405                    | 10.37144966                                           |                                      | 14.06183905 |             | 12.66880719    |        |
| 19.08380668             | 17.16674714                                           |                                      | 16.56254892 |             |                |        |
| ENSG00000100029         | 1449.67298                                            |                                      | 2013.337878 |             | 1834.349829    |        |
| 2688.251322             | 2098.222279                                           |                                      | 2755.253179 |             | 1765.786895    |        |
| 2513.908926             | -0.508977526                                          |                                      | 0.00241471  |             | 0.02104542     | PES1   |
| 22                      | 30576625                                              |                                      | 30607083    |             | -              | 4557   |
| protein_coding          | pescadillo ribosomal biogenesis factor 1 [Source:HGNC |                                      |             |             |                |        |
| Symbol;Acc:HGNC:8848]   | -                                                     | 1253                                 | 2172        | 1876        | 2676           | 2296   |
| 2808                    | 15.03719235                                           |                                      | 21.0142914  |             | 19.0702445     |        |

|                                                   |                                                       |             |             |                 |             |      |
|---------------------------------------------------|-------------------------------------------------------|-------------|-------------|-----------------|-------------|------|
| 28.39280482                                       | 21.95591056                                           | 28.76498227 |             |                 |             |      |
| ENSG00000283360                                   | 1.156961676                                           | 0           | 0           | 7.032047554     |             |      |
| 9.138598774                                       | 28.45525006                                           | 0.385653892 |             |                 |             |      |
| 14.8752988                                        | -5.352538971                                          | 0.002425488 | 1           | AL592295.3      |             |      |
| 1                                                 | 161403409                                             | 161470523   | -           | 863             |             |      |
| lincRNA novel transcript                          |                                                       | -           | 1           | 0               | 0           | 7    |
| 10                                                | 29                                                    | 0.063370031 | 0           | 0               | 0.392182726 |      |
| 0.504949332                                       |                                                       | 1.568675949 |             |                 |             |      |
| ENSG00000255084                                   | 0                                                     | 0           | 0           | 11.05036044     | 11.88017841 |      |
| 9.812155195                                       | 0                                                     | 10.91423135 |             | -5.868110653    |             |      |
| 0.00243136                                        | 1                                                     | AP003110.1  | 11          | 78533176        |             |      |
| 78558565                                          | +                                                     | 717         | antisense   | uncharacterized |             |      |
| LOC101928896 [Source:NCBI gene;Acc:101928896]     |                                                       |             |             | -               | 0           | 0    |
| 0                                                 | 11                                                    | 13          | 10          | 0               | 0           |      |
| 0.741779362                                       | 0.790101333                                           | 0.651068794 |             |                 |             |      |
| ENSG00000218428                                   | 1.156961676                                           | 0           | 0           | 27.12361199     |             |      |
| 8.224738897                                       | 8.830939675                                           | 0.385653892 |             |                 |             |      |
| 14.72643019                                       | -5.337101144                                          | 0.002436675 | 1           | NIP7P3          | 6           |      |
| 116137058                                         | 116137572                                             | -           | 515         |                 |             |      |
| processed_pseudogene                              | "NIP7, nucleolar pre-rRNA processing protein          |             |             |                 |             |      |
| pseudogene 3 [Source:HGNC Symbol;Acc:HGNC:45182]" |                                                       |             |             | -               | 1           |      |
| 0                                                 | 0                                                     | 27          | 9           | 9               | 0.106190945 | 0    |
| 0                                                 | 2.534882024                                           | 0.761542031 |             |                 | 0.81579552  |      |
| ENSG00000148154                                   | 1052.835125                                           | 1346.860008 |             |                 | 1391.407146 |      |
| 650.9666879                                       | 1096.631853                                           | 661.3392601 |             |                 | 1263.70076  |      |
| 802.979267                                        | 0.654082716                                           | 0.002436812 |             |                 | 0.021225951 | UGCG |
| 9                                                 | 111896766                                             | 111935369   | +           | 4615            |             |      |
| protein_coding                                    | UDP-glucose ceramide glucosyltransferase [Source:HGNC |             |             |                 |             |      |
| Symbol;Acc:HGNC:12524]                            | -                                                     | 910         | 1453        | 1423            | 648         | 1200 |
| 674                                               | 10.78361563                                           | 13.88122734 |             |                 | 14.28353326 |      |
| 6.788979808                                       | 11.33099736                                           | 6.817642544 |             |                 |             |      |
| ENSG00000227051                                   | 1115.311055                                           | 728.5835967 |             |                 | 1616.300782 |      |
| 665.030783                                        | 794.1442335                                           | 624.0530704 |             |                 | 1153.398478 |      |
| 694.4093623                                       | 0.73172902                                            | 0.002443022 |             |                 | 0.021267921 |      |
| C14orf132                                         | 14                                                    | 96039324    | 96093889    | +               |             | 7775 |
| protein_coding                                    | chromosome 14 open reading frame 132                  |             |             |                 |             |      |
| [Source:HGNC Symbol;Acc:HGNC:20346]               |                                                       |             |             | -               | 964         | 786  |
| 662                                               | 869                                                   | 636         | 6.780650331 |                 | 4.457138263 |      |
| 9.848609359                                       | 4.116790894                                           | 4.870549668 |             |                 | 3.818587563 |      |
| ENSG00000053501                                   | 631.7010749                                           | 600.6643393 |             |                 | 572.0120735 |      |
| 904.1203998                                       | 1000.676566                                           | 735.9116396 |             |                 | 601.4591626 |      |
| 880.2362017                                       | -0.549924459                                          | 0.002446908 |             |                 | 0.021289634 | USE1 |
| 19                                                | 17215346                                              | 17219829    | +           | 2431            |             |      |
| protein_coding                                    | unconventional SNARE in the ER 1 [Source:HGNC         |             |             |                 |             |      |
| Symbol;Acc:HGNC:30882]                            | -                                                     | 546         | 648         | 585             | 900         | 1095 |
| 750                                               | 12.28294187                                           | 11.75233074 |             |                 | 11.1473943  |      |
| 17.90023642                                       | 19.62852919                                           | 14.40198454 |             |                 |             |      |
| ENSG00000133703                                   | 1281.913537                                           | 1128.099538 |             |                 | 1176.291495 |      |
| 888.0471483                                       | 887.357941                                            | 828.1458984 |             |                 | 1195.434857 |      |
| 867.8503292                                       | 0.461602736                                           | 0.002455241 |             |                 | 0.021349984 | KRAS |

|                                     |                                                     |             |             |             |                |
|-------------------------------------|-----------------------------------------------------|-------------|-------------|-------------|----------------|
| 12                                  | 25204789                                            | 25250936    | -           | 7302        |                |
| protein_coding                      | "KRAS proto-oncogene, GTPase [Source:HGNC           |             |             |             |                |
| Symbol;Acc:HGNC:6407]"              | -                                                   | 1108        | 1217        | 1203        | 884 971        |
| 844                                 | 8.298367128                                         | 7.34822943  |             | 7.63178724  |                |
| 5.853446495                         | 5.794767278                                         | 5.395685823 |             |             |                |
| ENSG00000136235                     | 4234.479733                                         | 3695.754199 |             | 4510.584094 |                |
| 2834.919743                         | 3033.100933                                         | 3431.310672 |             | 4146.939342 |                |
| 3099.777116                         | 0.419798061                                         | 0.00246535  |             | 0.0214257   | GPNMB          |
| 7                                   | 23235967                                            | 23275108    | +           | 6040        |                |
| protein_coding                      | glycoprotein nmb [Source:HGNC Symbol;Acc:HGNC:4462] |             |             |             |                |
| -                                   | 3660                                                | 3987        | 4613        | 2822        | 3319 3497      |
| 33.13895883                         | 29.10336828                                         | 35.37927849 |             | 22.59026301 |                |
| 23.94577578                         | 27.02742865                                         |             |             |             |                |
| ENSG00000266017                     | 31.23796524                                         | 38.93194792 |             | 48.88992081 |                |
| 75.34336665                         | 123.3710835                                         | 105.9712761 |             | 39.68661132 |                |
| 101.5619087                         | -1.353446575                                        | 0.002474087 |             | 0.021489417 |                |
| MIR4477B                            | 9                                                   | 63819574    | 63819654    | +           | 81             |
| miRNA                               | microRNA 4477b [Source:HGNC Symbol;Acc:HGNC:41898]  |             |             |             |                |
| -                                   | 27                                                  | 42          | 50          | 75          | 135 108        |
| 18.22944548                         | 22.86115823                                         | 28.59482488 |             | 44.76900694 |                |
| 72.62854559                         | 62.24217674                                         |             |             |             |                |
| ENSG00000121753                     | 141.1493244                                         | 120.5036483 |             | 159.3811418 |                |
| 92.42119643                         | 36.5543951                                          | 40.2298363  |             | 140.3447049 |                |
| 56.40180927                         | 1.317278632                                         | 0.002478056 |             | 0.021511668 | ADGRB2         |
| 1                                   | 31727117                                            | 31764893    | -           | 7756        |                |
| protein_coding                      | adhesion G protein-coupled receptor B2 [Source:HGNC |             |             |             |                |
| Symbol;Acc:HGNC:944]"               | -                                                   | 122         | 130         | 163         | 92 40          |
| 41                                  | 0.860234276                                         | 0.738991614 |             | 0.973536547 |                |
| 0.573523534                         | 0.224740213                                         | 0.246769847 |             |             |                |
| ENSG00000266947                     | 4.627846703                                         | 31.51633879 |             | 25.42275882 |                |
| 97.44408754                         | 46.60685375                                         | 94.19668987 |             | 20.52231477 |                |
| 79.41587705                         | -1.939410162                                        | 0.002483578 |             | 0.021547365 |                |
| AC022916.1                          | 17                                                  | 35231450    | 35242963    | -           | 2814           |
| antisense                           | "novel transcript, antisense SLFN5"                 |             |             |             | -              |
| 4                                   | 34                                                  | 26          | 97          | 51          | 96 0.077737507 |
| 0.532707464                         | 0.428007827                                         | 1.666667081 |             | 0.789777361 |                |
| 1.592550364                         |                                                     |             |             |             |                |
| ENSG00000150938                     | 1389.510973                                         | 1444.189877 |             | 1781.548714 |                |
| 1189.420615                         | 754.8482587                                         | 1135.266356 |             | 1538.416521 |                |
| 1026.511743                         | 0.584235174                                         | 0.002488505 |             | 0.021577866 | CRIM1          |
| 2                                   | 36355926                                            | 36551135    | +           | 7122        |                |
| protein_coding                      | cysteine rich transmembrane BMP regulator 1         |             |             |             |                |
| [Source:HGNC Symbol;Acc:HGNC:2359]" | -                                                   |             |             | 1201        | 1558 1822      |
| 1184                                | 826                                                 | 1157        | 9.222225787 | 9.644938038 |                |
| 11.85083248                         | 8.038054556                                         | 5.054016736 |             | 7.583635056 |                |
| ENSG00000179886                     | 304.2809207                                         | 508.8961763 |             | 595.4792354 |                |
| 790.6030607                         | 680.8256087                                         | 846.7889933 |             | 469.5521108 |                |
| 772.7392209                         | -0.716890618                                        | 0.002498035 |             | 0.021648218 | TIGD5          |
| 8                                   | 143597835                                           | 143603224   | +           | 5390        |                |
| protein_coding                      | tigger transposable element derived 5 [Source:HGNC  |             |             |             |                |



|                                                                       |              |             |      |             |                |       |
|-----------------------------------------------------------------------|--------------|-------------|------|-------------|----------------|-------|
| Symbol;Acc:HGNC:18336]                                                | -            | 263         | 549  | 609         | 787            | 745   |
| 863                                                                   | 2.668466138  | 4.49073613  |      | 5.233967038 |                |       |
| 7.059715239                                                           | 6.023183651  | 7.47425768  |      |             |                |       |
| ENSG00000107104                                                       | 533.3593325  | 433.8131339 |      | 599.3904291 |                |       |
| 396.8083977                                                           | 247.6560268  | 306.1392421 |      | 522.1876318 |                |       |
| 316.8678889                                                           | 0.721156006  | 0.00250835  |      | 0.021724209 |                | KANK1 |
| 9                                                                     | 470291       | 746106      | +    | 11908       | protein_coding | KN    |
| motif and ankyrin repeat domains 1 [Source:HGNC                       |              |             |      |             |                |       |
| Symbol;Acc:HGNC:19309]                                                | -            | 461         | 468  | 613         | 395            | 271   |
| 312                                                                   | 2.117175268  | 1.732770259 |      | 2.384647027 |                |       |
| 1.603834259                                                           | 0.991719979  | 1.223099543 |      |             |                |       |
| ENSG00000102271                                                       | 472.0403637  | 281.7931468 |      | 209.2488611 |                |       |
| 99.45324398                                                           | 183.6858354  | 184.4685177 |      | 321.0274572 |                |       |
| 155.869199                                                            | 1.040018449  | 0.002509646 |      | 0.021724209 |                | KLHL4 |
| X                                                                     | 87517749     | 87670050    |      | +           | 5818           |       |
| protein_coding kelch like family member 4 [Source:HGNC                |              |             |      |             |                |       |
| Symbol;Acc:HGNC:6355]                                                 | -            | 408         | 304  | 214         | 99             | 201   |
| 188                                                                   | 3.83513944   | 2.303741918 |      | 1.703893759 |                |       |
| 0.822740155                                                           | 1.505500618  | 1.508447391 |      |             |                |       |
| ENSG00000163492                                                       | 0            | 2.780853423 |      | 1.955596832 | 9.041203998    |       |
|                                                                       | 31.07123583  | 25.51160351 |      | 1.578816752 | 21.87468111    |       |
|                                                                       | -3.749280956 | 0.002517169 |      | 1           | CCDC141        | 2     |
| 178829757                                                             | 179050086    | -           |      | 15446       | protein_coding |       |
| coiled-coil domain containing 141 [Source:HGNC Symbol;Acc:HGNC:26821] |              |             |      |             |                |       |
| -                                                                     | 0            | 3           | 2    | 9           | 34             | 26    |
|                                                                       | 0.008563261  | 0.005998138 |      | 0.02817265  | 0.09592272     | 0     |
|                                                                       | 0.078578431  |             |      |             |                |       |
| ENSG00000135763                                                       | 587.7365313  | 578.4175119 |      | 683.4810929 |                |       |
| 987.5003922                                                           | 797.799673   | 888.9812606 |      | 616.5450453 |                |       |
| 891.4271086                                                           | -0.531498233 | 0.00252556  |      | 0.021849597 |                | URB2  |
| 1                                                                     | 229626234    | 229660199   |      | +           | 6001           |       |
| protein_coding URB2 ribosome biogenesis 2 homolog (S. cerevisiae)     |              |             |      |             |                |       |
| [Source:HGNC Symbol;Acc:HGNC:28967]                                   | -            |             |      | 508         | 624            | 699   |
| 983                                                                   | 873          | 906         |      | 4.629507567 | 4.584531076    |       |
| 5.395802                                                              | 7.920108069  | 6.339415461 |      | 7.047751891 |                |       |
| ENSG00000149115                                                       | 1877.7488    | 2481.448204 |      | 2466.007606 |                |       |
| 2798.754927                                                           | 3126.314641  | 3559.849905 |      | 2275.068203 |                |       |
| 3161.639824                                                           | -0.474355673 | 0.002528087 |      | 0.021859089 |                |       |
| TNKS1BP1                                                              | 11           | 57299638    |      | 57324952    | -              | 7149  |
| protein_coding tankyrase 1 binding protein 1 [Source:HGNC             |              |             |      |             |                |       |
| Symbol;Acc:HGNC:19081]                                                | -            | 1623        | 2677 | 2522        | 2786           | 3421  |
| 3628                                                                  | 12.41560638  | 16.50961828 |      | 16.34188842 |                |       |
| 18.84243525                                                           | 20.85289588  | 23.69016127 |      |             |                |       |
| ENSG00000102760                                                       | 194.3695615  | 262.3271729 |      | 161.3367387 |                |       |
| 236.0758822                                                           | 360.9746516  | 649.5646739 |      | 206.0111577 |                |       |
| 415.5384025                                                           | -1.011594094 | 0.00253275  |      | 0.02188703  |                | RGCC  |
| 13                                                                    | 41457559     | 41470882    |      | +           | 1032           |       |
| protein_coding regulator of cell cycle [Source:HGNC                   |              |             |      |             |                |       |
| Symbol;Acc:HGNC:20369]                                                | -            | 168         | 283  | 165         | 235            | 395   |
| 662                                                                   | 8.902752442  | 12.09040075 |      | 7.406392143 |                |       |

|                        |                                           |                                    |             |                |  |
|------------------------|-------------------------------------------|------------------------------------|-------------|----------------|--|
| 11.01005229            | 16.67922995                               | 29.94500073                        |             |                |  |
| ENSG00000109654        | 378.326468                                | 265.1080263                        | 367.6522045 |                |  |
| 100.4578222            | 266.8470842                               | 120.6895089                        | 337.0288996 |                |  |
| 162.6648051            | 1.048681354                               | 0.002536606                        | 0.021907965 | TRIM2          |  |
| 4                      | 153152342                                 | 153339320                          | + 9425      |                |  |
| protein_coding         | tripartite motif containing 2             | [Source:HGNC                       |             |                |  |
| Symbol;Acc:HGNC:15974] | -                                         | 327 286                            | 376 100     | 292            |  |
| 123                    | 1.897409657                               | 1.337884531                        | 1.84802968  |                |  |
| 0.513002944            | 1.350081824                               | 0.609213878                        |             |                |  |
| ENSG00000125944        | 7302.742097                               | 6709.272357                        | 7546.648176 |                |  |
| 5838.608626            | 5556.268055                               | 5442.802486                        | 7186.220877 |                |  |
| 5612.559723            | 0.356546175                               | 0.002543401                        | 0.021954247 | HNRNPR         |  |
| 1                      | 23303771                                  | 23344336                           | - 8676      |                |  |
| protein_coding         | heterogeneous nuclear ribonucleoprotein R | [Source:HGNC                       |             |                |  |
| Symbol;Acc:HGNC:5047]  | -                                         | 6312 7238                          | 7718 5812   | 6080           |  |
| 5547                   | 39.78708847                               | 36.78180125                        | 41.20858353 |                |  |
| 32.38972635            | 30.53814365                               | 29.84589855                        |             |                |  |
| ENSG00000108479        | 393.3669697                               | 671.112626                         | 528.9889431 |                |  |
| 736.3558367            | 833.4402082                               | 935.0983901                        | 531.1561796 |                |  |
| 834.9648117            | -0.651033253                              | 0.002544938                        | 0.021955119 | GALK1          |  |
| 17                     | 75751594                                  | 75765711                           | - 2891      |                |  |
| protein_coding         | galactokinase 1                           | [Source:HGNC Symbol;Acc:HGNC:4118] |             |                |  |
| -                      | 340 724                                   | 541 733                            | 912 953     |                |  |
| 6.431696433            | 11.04140735                               | 8.668653208                        | 12.25905799 |                |  |
| 13.74691807            | 15.3883071                                |                                    |             |                |  |
| ENSG00000113300        | 1087.543975                               | 963.1022353                        | 1203.66985  |                |  |
| 819.7358292            | 671.6870099                               | 786.9348466                        | 1084.77202  |                |  |
| 759.4525619            | 0.514517271                               | 0.002550584                        | 0.021991417 | CNOT6          |  |
| 5                      | 180494412                                 | 180578405                          | + 6586      |                |  |
| protein_coding         | CCR4-NOT transcription complex subunit 6  | [Source:HGNC                       |             |                |  |
| Symbol;Acc:HGNC:14099] | -                                         | 940 1039                           | 1231 816    | 735            |  |
| 802                    | 7.805502011                               | 6.955490778                        | 8.658422666 |                |  |
| 5.990590713            | 4.863223293                               | 5.684583861                        |             |                |  |
| ENSG00000067182        | 1854.609566                               | 2102.325187                        | 2018.175931 |                |  |
| 2465.234957            | 2767.167709                               | 2662.037704                        | 1991.703562 |                |  |
| 2631.480123            | -0.401658694                              | 0.002555598                        | 0.022010869 |                |  |
| TNFRSF1A               | 12 6328757                                | 6342114 -                          | 4005        | protein_coding |  |
|                        | TNF receptor superfamily member 1A        | [Source:HGNC                       |             |                |  |
| Symbol;Acc:HGNC:11916] | -                                         | 1603 2268                          | 2064 2454   | 3028           |  |
| 2713                   | 21.88898959                               | 24.96746719                        | 23.87314459 |                |  |
| 29.6260161             | 32.94670203                               | 31.62228942                        |             |                |  |
| ENSG00000132612        | 1666.024813                               | 1949.378249                        | 1994.708769 |                |  |
| 2687.246744            | 2321.204089                               | 2531.53604                         | 1870.037277 |                |  |
| 2513.328958            | -0.426057064                              | 0.002555572                        | 0.022010869 | VPS4A          |  |
| 16                     | 69311356                                  | 69326939                           | + 5670      |                |  |
| protein_coding         | vacuolar protein sorting 4 homolog A      | [Source:HGNC                       |             |                |  |
| Symbol;Acc:HGNC:13488] | -                                         | 1440 2103                          | 2040 2675   | 2540           |  |
| 2580                   | 13.88910132                               | 16.35272645                        | 16.66669793 |                |  |
| 22.81087496            | 19.52132336                               | 21.24137778                        |             |                |  |
| ENSG00000196628        | 2070.9614                                 | 1399.696223                        | 1970.263809 |                |  |

|                                                |                                                     |             |             |                |      |             |
|------------------------------------------------|-----------------------------------------------------|-------------|-------------|----------------|------|-------------|
| 1382.299634                                    | 1168.826783                                         | 1222.594537 | 1813.640477 |                |      |             |
| 1257.906985                                    | 0.527538225                                         | 0.002570043 | 0.02212176  | TCF4           |      |             |
| 18                                             | 55222331                                            | 55664787    | -           | 27828          |      |             |
| protein_coding                                 | transcription factor 4 [Source:HGNC                 |             |             |                |      |             |
| Symbol;Acc:HGNC:11634]                         | bHLH                                                | 1790        | 1510        | 2015           | 1376 | 1279        |
| 1246                                           | 3.517756296                                         | 2.3923731   | 3.354250642 |                |      |             |
| 2.390769219                                    | 2.00284411                                          | 2.090172278 |             |                |      |             |
| ENSG00000254527                                | 0                                                   | 3.707804563 | 5.866790497 | 38.17397244    |      |             |
| 27.41579632                                    | 19.62431039                                         | 3.191531687 | 28.40469305 |                |      |             |
| -3.124392803                                   | 0.002573232                                         | 0.022125855 | ENPP7P12    |                |      |             |
| 8                                              | 12205759                                            | 12206389    | -           | 631            |      |             |
| processed_pseudogene                           | ectonucleotide pyrophosphatase/                     |             |             |                |      |             |
| phosphodiesterase 7 pseudogene 12 [Source:HGNC | Symbol;Acc:HGNC:48697]                              |             |             |                |      |             |
| -                                              | 0                                                   | 4           | 6           | 38             | 30   | 20          |
| 0.279488917                                    | 0.440478127                                         | 2.911759183 | 2.071812711 |                |      |             |
| 1.479608005                                    |                                                     |             |             |                |      |             |
| ENSG00000096080                                | 476.6682104                                         | 487.5763001 | 494.7659986 |                |      |             |
| 688.1360821                                    | 727.4324624                                         | 680.9635705 | 486.3368364 |                |      |             |
| 698.8440383                                    | -0.522951162                                        | 0.002573413 | 0.022125855 |                |      |             |
| MRPS18A 6                                      | 43671303                                            | 43687791    | -           | 1284           |      |             |
| protein_coding                                 | mitochondrial ribosomal protein S18A [Source:HGNC   |             |             |                |      |             |
| Symbol;Acc:HGNC:14515]                         | -                                                   | 412         | 526         | 506            | 685  | 796         |
| 694                                            | 17.54797088                                         | 18.06153589 | 18.2552569  |                |      |             |
| 25.79447923                                    | 27.01510387                                         | 25.23134968 |             |                |      |             |
| ENSG00000181284                                | 230.2353735                                         | 302.1860719 | 255.2053866 |                |      |             |
| 361.6481599                                    | 511.7615314                                         | 417.0165958 | 262.5422773 |                |      |             |
| 430.1420957                                    | -0.711410503                                        | 0.002584178 | 0.022205922 |                |      |             |
| TMEM102 17                                     | 7435443                                             | 7437679 +   | 2129        | protein_coding |      |             |
| transmembrane protein 102 [Source:HGNC         | Symbol;Acc:HGNC:26722]                              |             |             |                |      |             |
| 199                                            | 326                                                 | 261         | 360         | 560            | 425  | 5.111779685 |
| 6.751121073                                    | 5.678940281                                         | 8.175758524 | 11.46227868 |                |      |             |
| 9.318785268                                    |                                                     |             |             |                |      |             |
| ENSG00000182263                                | 190.8986765                                         | 162.2164496 | 309.9620979 |                |      |             |
| 100.4578222                                    | 130.6819625                                         | 96.15912091 | 221.0257414 |                |      |             |
| 109.0996352                                    | 1.018063317                                         | 0.002606065 | 0.022381411 | FIGN           |      |             |
| 2                                              | 163593396                                           | 163736012   | -           | 9942           |      |             |
| protein_coding                                 | "fidgetin, microtubule severing factor [Source:HGNC |             |             |                |      |             |
| Symbol;Acc:HGNC:13285]"                        | -                                                   | 165         | 175         | 317            | 100  | 143         |
| 98                                             | 0.907621757                                         | 0.776065269 | 1.477025384 |                |      |             |
| 0.486325966                                    | 0.626788293                                         | 0.460148862 |             |                |      |             |
| ENSG00000133313                                | 1604.705844                                         | 1743.595096 | 1835.327627 |                |      |             |
| 1143.210017                                    | 1280.317688                                         | 1382.532667 | 1727.876189 |                |      |             |
| 1268.686791                                    | 0.445827339                                         | 0.002625976 | 0.022539751 | CNDP2          |      |             |
| 18                                             | 74495816                                            | 74523454    | +           | 11848          |      |             |
| protein_coding                                 | carnosine dipeptidase 2 [Source:HGNC                |             |             |                |      |             |
| Symbol;Acc:HGNC:24437]                         | -                                                   | 1387        | 1881        | 1877           | 1138 | 1401        |
| 1409                                           | 6.402154172                                         | 6.999672294 | 7.338743064 |                |      |             |
| 4.644066533                                    | 5.152899681                                         | 5.551520955 |             |                |      |             |
| ENSG00000261888                                | 31.23796524                                         | 19.46597396 | 20.53376674 |                |      |             |
| 122.5585431                                    | 40.20983461                                         | 71.62873292 | 23.74590198 |                |      |             |

|                                                                     |              |             |             |             |                               |
|---------------------------------------------------------------------|--------------|-------------|-------------|-------------|-------------------------------|
| 78.1323702                                                          | -1.722219257 | 0.002631662 | 0.022575877 |             |                               |
| AC144831.1                                                          | 17           | 83104255    | 83106910    | +           | 2656                          |
| lincRNA novel transcript                                            |              | -           | 27          | 21          | 21                            |
| 122                                                                 | 44           | 73          | 0.555943179 | 0.348598233 |                               |
| 0.366263533                                                         | 2.220920314  | 0.721910242 | 1.283041859 |             |                               |
| ENSG00000160392                                                     | 712.6883922  | 878.7496815 | 1121.534783 |             |                               |
| 1473.716252                                                         | 1283.973128  | 1249.087356 | 904.3242857 |             |                               |
| 1335.592245                                                         | -0.561732805 | 0.002634598 | 0.022588393 |             |                               |
| C19orf47                                                            | 19           | 40319536    | 40348527    | -           | 4875                          |
| protein_coding chromosome 19 open reading frame 47                  |              |             |             |             |                               |
| [Source:HGNC Symbol;Acc:HGNC:26723]                                 |              | -           | 616         | 948         | 1147                          |
| 1467                                                                | 1405         | 1273        | 6.910362101 | 8.573687999 |                               |
| 10.89911547                                                         | 14.5497895   | 12.55915158 | 12.18989092 |             |                               |
| ENSG00000073578                                                     | 1421.905899  | 1472.925363 | 1658.346114 |             |                               |
| 1112.068092                                                         | 930.3093552  | 1214.744813 | 1517.725792 |             |                               |
| 1085.70742                                                          | 0.483684094  | 0.002636826 | 0.022594824 |             | SDHA                          |
| 5                                                                   | 218241       | 256700      | +           | 8383        | protein_coding                |
| succinate dehydrogenase complex flavoprotein subunit A [Source:HGNC |              |             |             |             |                               |
| Symbol;Acc:HGNC:10680]                                              | -            | 1229        | 1589        | 1696        | 1107                          |
| 1238                                                                | 8.017650659  | 8.35715369  | 9.371925715 |             | 1018                          |
| 6.384830482                                                         | 5.291842496  | 6.893935477 |             |             |                               |
| ENSG00000143319                                                     | 2070.9614    | 2067.101044 | 2122.800361 |             |                               |
| 2607.885064                                                         | 2800.980524  | 2725.816713 | 2086.954268 |             |                               |
| 2711.560767                                                         | -0.377755667 | 0.002658163 | 0.022764893 |             |                               |
| ISG20L2 1                                                           | 156721891    | 156728799   | -           | 5262        |                               |
| protein_coding interferon stimulated exonuclease gene 20 like 2     |              |             |             |             |                               |
| [Source:HGNC Symbol;Acc:HGNC:25745]                                 |              | -           | 1790        | 2230        | 2171                          |
| 2596                                                                | 3065         | 2778        | 18.60359601 | 18.68477951 |                               |
| 19.11223318                                                         | 23.85366199  | 25.38272431 | 24.64492118 |             |                               |
| ENSG00000188706                                                     | 1112.997132  | 1157.761975 | 1216.38123  |             |                               |
| 1787.144657                                                         | 1427.449129  | 1567.9824   | 1162.380112 |             |                               |
| 1594.192062                                                         | -0.455379614 | 0.002665547 | 0.022815347 |             | ZDHHC9                        |
| X                                                                   | 129803288    | 129843909   | -           | 5243        |                               |
| protein_coding zinc finger DHHC-type containing 9 [Source:HGNC      |              |             |             |             |                               |
| Symbol;Acc:HGNC:18475]                                              | -            | 962         | 1249        | 1244        | 1779                          |
| 1598                                                                | 10.03436575  | 10.50307674 | 10.99114604 |             | 1562                          |
| 16.405796                                                           | 12.982543    | 14.2279704  |             |             |                               |
| ENSG00000023318                                                     | 1093.328784  | 925.0972386 | 963.1314399 |             |                               |
| 714.2551159                                                         | 718.2938636  | 696.6630188 | 993.8524873 |             |                               |
| 709.7373328                                                         | 0.485167241  | 0.002672769 | 0.022864361 |             | ERP44                         |
| 9                                                                   | 99979179     | 100099040   | -           | 4854        |                               |
| protein_coding endoplasmic reticulum protein 44 [Source:HGNC        |              |             |             |             |                               |
| Symbol;Acc:HGNC:18311]                                              | -            | 945         | 998         | 985         | 711                           |
| 710                                                                 | 10.64698762  | 9.064935687 | 9.400239404 |             | 786                           |
| 7.08224661                                                          | 7.056370437  | 6.828174519 |             |             |                               |
| ENSG00000239556                                                     | 21.98227184  | 6.488657986 | 21.51156516 |             | 0                             |
| 0.913859877                                                         | 0.981215519  | 16.66083166 | 0.631691799 |             |                               |
| 4.702608079                                                         | 0.002681902  | 1           | AC004951.2  |             | 7                             |
| 43984995                                                            | 43990207     | -           | 793         |             |                               |
| transcribed_unprocessed_pseudogene                                  |              |             |             |             | uroplakin-like protein (UPLP) |

|                                      |                                                       |             |             |             |             |       |             |
|--------------------------------------|-------------------------------------------------------|-------------|-------------|-------------|-------------|-------|-------------|
| pseudogene                           | -                                                     | 19          | 7           | 22          | 0           | 1     | 1           |
|                                      | 1.310313231                                           | 0.389187435 |             | 1.285144463 | 0           |       |             |
| 0.054952241                          | 0.058867128                                           |             |             |             |             |       |             |
| ENSG00000114648                      | 1250.675571                                           |             | 1074.336372 |             | 1311.227676 |       |             |
| 1772.075984                          | 1720.798149                                           |             | 1506.165822 |             | 1212.079873 |       |             |
| 1666.346652                          | -0.459484445                                          |             | 0.002685263 |             | 0.022958398 |       | KLHL18      |
|                                      | 3                                                     | 47282917    | 47346816    |             | +           | 7064  |             |
| protein_coding                       | kelch like family member 18 [Source:HGNC              |             |             |             |             |       |             |
| Symbol;Acc:HGNC:29120]               | -                                                     | 1081        | 1159        | 1341        | 1764        |       | 1883        |
|                                      | 1535                                                  | 8.368925776 | 7.233803434 |             | 8.793880164 |       |             |
| 12.0739426                           | 11.61604343                                           |             | 10.14387117 |             |             |       |             |
| ENSG00000130518                      | 43.96454368                                           |             | 79.71779811 |             | 61.60130022 |       |             |
| 211.9660048                          | 125.1988032                                           |             | 104.0088451 |             | 61.761214   |       |             |
| 147.0578844                          | -1.247097054                                          |             | 0.00269156  |             | 0.022990416 |       | IQCIN       |
|                                      | 19                                                    | 18257097    | 18274509    |             | -           | 9154  |             |
| protein_coding                       | IQ motif containing N [Source:HGNC                    |             |             |             |             |       |             |
| Symbol;Acc:HGNC:29350]               | -                                                     | 38          | 86          | 63          | 211         |       | 137         |
|                                      | 106                                                   | 0.227021716 | 0.414210879 |             | 0.318810119 |       |             |
| 1.114481243                          | 0.652181172                                           |             | 0.540556374 |             |             |       |             |
| ENSG00000162733                      | 3365.601515                                           |             | 3001.467794 |             | 3486.829152 |       |             |
| 2723.41156                           | 2405.279197                                           |             | 2293.100669 |             | 3284.63282  |       |             |
| 2473.930475                          | 0.408891576                                           |             | 0.002692016 |             | 0.022990416 |       | DDR2        |
|                                      | 1                                                     | 162631373   | 162787400   |             | +           | 10730 |             |
| protein_coding                       | discoidin domain receptor tyrosine kinase 2           |             |             |             |             |       |             |
| [Source:HGNC Symbol;Acc:HGNC:2731]   | -                                                     | 2909        | 3238        |             |             |       | 3566        |
|                                      | 2711                                                  | 2632        | 2337        | 14.82650239 | 13.30488363 |       |             |
| 15.39515524                          | 12.21605592                                           |             | 10.68918911 |             | 10.16728567 |       |             |
| ENSG00000163508                      | 5.784808379                                           |             | 4.634755704 |             | 10.75578258 |       |             |
| 63.28842799                          | 33.81281546                                           |             | 19.62431039 |             | 7.058448887 |       |             |
| 38.90851795                          | -2.460298407                                          |             | 0.002697572 |             | 0.023025007 |       | EOMES       |
|                                      | 3                                                     | 27715949    | 27722711    |             | -           | 3656  |             |
| protein_coding                       | eomesodermin [Source:HGNC Symbol;Acc:HGNC:3372] T-box |             |             |             |             |       |             |
|                                      | 5                                                     | 5           | 11          | 63          | 37          | 20    | 0.074792583 |
|                                      | 0.060297287                                           |             | 0.139376307 |             | 0.833173751 |       | 0.441015786 |
|                                      | 0.255369981                                           |             |             |             |             |       |             |
| ENSG00000124225                      | 3956.808931                                           |             | 1970.698125 |             | 3627.632124 |       |             |
| 2302.493285                          | 2018.716469                                           |             | 1847.628823 |             | 3185.046393 |       |             |
| 2056.279526                          | 0.631009608                                           |             | 0.002726869 |             | 0.023262082 |       | PMEPA1      |
|                                      | 20                                                    | 57648392    | 57711536    |             | -           | 5619  |             |
| protein_coding                       | "prostate transmembrane protein, androgen induced 1   |             |             |             |             |       |             |
| [Source:HGNC Symbol;Acc:HGNC:14107]" | -                                                     | 3420        | 2126        |             |             |       | 3710        |
|                                      | 2292                                                  | 2209        | 1883        | 33.28601363 | 16.68161855 |       |             |
| 30.58562316                          | 19.72226535                                           |             | 17.1314957  |             | 15.64362237 |       |             |
| ENSG00000134242                      | 807.5592496                                           |             | 812.9361505 |             | 490.8548049 |       |             |
| 943.2989505                          | 1226.399955                                           |             | 1103.867459 |             | 703.7834017 |       |             |
| 1091.188788                          | -0.63324346                                           |             | 0.002731888 |             | 0.023291899 |       | PTPN22      |
|                                      | 1                                                     | 113813811   | 113871759   |             | -           | 4503  |             |
| protein_coding                       | "protein tyrosine phosphatase, non-receptor type 22   |             |             |             |             |       |             |
| [Source:HGNC Symbol;Acc:HGNC:9652]"  | -                                                     | 698         | 877         |             |             |       | 502         |
|                                      | 939                                                   | 1342        | 1125        | 8.477117217 | 8.586805077 |       |             |

|                                     |                                                           |                                    |             |             |      |
|-------------------------------------|-----------------------------------------------------------|------------------------------------|-------------|-------------|------|
| 5.164213944                         | 10.08242179                                               | 12.98700975                        | 11.66263305 |             |      |
| ENSG00000159753                     | 49.74935206                                               | 99.18377207                        | 54.75671131 |             |      |
| 221.0072088                         | 227.5511095                                               | 75.553595                          | 67.89661181 |             |      |
| 174.7039711                         | -1.360495888                                              | 0.002734038                        | 0.023297236 |             |      |
| CARMIL2 16                          | 67644919                                                  | 67657569                           | + 7699      |             |      |
| protein_coding                      | capping protein regulator and myosin 1 linker 2           |                                    |             |             |      |
| [Source:HGNC Symbol;Acc:HGNC:27089] | -                                                         | 43                                 | 107         | 56          |      |
| 220                                 | 249                                                       | 77                                 | 0.305442066 | 0.612750136 |      |
| 0.336942787                         | 1.381623074                                               | 1.409365464                        | 0.466876959 |             |      |
| ENSG00000143669                     | 1268.029997                                               | 1019.646255                        | 1253.53757  |             |      |
| 884.0288354                         | 875.4777626                                               | 730.0243465                        | 1180.404607 |             |      |
| 829.8436481                         | 0.507908375                                               | 0.002735946                        | 0.023298033 | LYST        |      |
| 1                                   | 235661041                                                 | 235883640                          | - 19614     |             |      |
| protein_coding                      | lysosomal trafficking regulator [Source:HGNC              |                                    |             |             |      |
| Symbol;Acc:HGNC:1968]               | -                                                         | 1096                               | 1100        | 1282        | 880  |
| 744                                 | 3.055899701                                               | 2.472637618                        | 3.027779959 | 958         |      |
| 2.169290517                         | 2.128422963                                               | 1.770731856                        |             |             |      |
| ENSG00000138443                     | 1790.976674                                               | 1412.673539                        | 1829.460837 |             |      |
| 1242.663261                         | 1188.931701                                               | 1214.744813                        | 1677.703683 |             |      |
| 1215.446591                         | 0.464711949                                               | 0.002738073                        | 0.023298033 | ABI2        |      |
| 2                                   | 203328219                                                 | 203447723                          | + 23331     |             |      |
| protein_coding                      | abl interactor 2 [Source:HGNC Symbol;Acc:HGNC:24011]      |                                    |             |             |      |
| -                                   | 1548                                                      | 1524                               | 1871        | 1237        | 1301 |
| 3.628543346                         | 2.879954134                                               | 3.714863749                        | 2.563525031 |             |      |
| 2.429979113                         | 2.477041751                                               |                                    |             |             |      |
| ENSG00000100441                     | 588.8934929                                               | 720.2410364                        | 705.9704565 |             |      |
| 997.5461745                         | 869.0807434                                               | 1014.576847                        | 671.7016619 |             |      |
| 960.401255                          | -0.514790563                                              | 0.002738704                        | 0.023298033 | KHNYN       |      |
| 14                                  | 24429286                                                  | 24441834                           | + 8015      |             |      |
| protein_coding                      | KH and NYN domain containing [Source:HGNC                 |                                    |             |             |      |
| Symbol;Acc:HGNC:20166]              | -                                                         | 509                                | 777         | 722         | 993  |
| 1034                                | 3.473033468                                               | 4.274166638                        | 4.172882218 | 951         |      |
| 5.990277455                         | 5.170536259                                               | 6.022309178                        |             |             |      |
| ENSG00000285035                     | 9.255693406                                               | 4.634755704                        | 18.57816991 | 0           |      |
| 0                                   | 0                                                         | 10.82287301                        | 0           | 5.928838211 |      |
| 0.002739441                         | 1                                                         | AC091057.7                         | 15          | 30644633    |      |
| 30723495                            | + 675                                                     | transcribed_unprocessed_pseudogene |             |             |      |
|                                     | "Serine/threonine-protein kinase ULK4 (ULK4), pseudogene" |                                    |             |             |      |
| -                                   | 8                                                         | 5                                  | 19          | 0           | 0    |
| 0.648158061                         | 0.326587975                                               | 1.303924015                        | 0           | 0           | 0    |
| ENSG00000117616                     | 709.2175072                                               | 499.6266649                        | 614.0574053 |             |      |
| 435.9869484                         | 363.7162312                                               | 383.6552681                        | 607.6338592 |             |      |
| 394.4528159                         | 0.622645531                                               | 0.002741156                        | 0.023305925 | RSRP1       |      |
| 1                                   | 25242237                                                  | 25338213                           | - 6804      |             |      |
| protein_coding                      | arginine and serine rich protein 1 [Source:HGNC           |                                    |             |             |      |
| Symbol;Acc:HGNC:25234]              | -                                                         | 613                                | 539         | 628         | 434  |
| 391                                 | 4.92709439                                                | 3.492676951                        | 4.275607149 | 398         |      |
| 3.084087145                         | 2.549044193                                               | 2.682615863                        |             |             |      |
| ENSG00000168495                     | 2275.743616                                               | 2599.170999                        | 2497.297155 |             |      |
| 3397.483547                         | 2955.422844                                               | 3365.569232                        | 2457.403923 |             |      |

|                        |                                                   |             |                                    |             |
|------------------------|---------------------------------------------------|-------------|------------------------------------|-------------|
| 3239.491874            | -0.398303436                                      | 0.002747879 | 0.023350097                        | POLR3D      |
| 8                      | 22245104                                          | 22254600    | + 5611                             |             |
| protein_coding         | RNA polymerase III subunit D [Source:HGNC         |             |                                    |             |
| Symbol;Acc:HGNC:1080]  | -                                                 | 1967 2804   | 2554 3382                          | 3234        |
| 3430                   | 19.17161963                                       | 22.03290179 | 21.08546                           |             |
| 29.14301978            | 25.11645515                                       | 28.53644621 |                                    |             |
| ENSG00000233452        | 79.83035562                                       | 149.2391337 | 48.88992081                        |             |
| 268.2223853            | 212.9293514                                       | 159.9381297 | 92.6531367                         |             |
| 213.6966221            | -1.203104701                                      | 0.002753495 | 0.023378925                        |             |
| STXBP5-AS1             | 6                                                 | 146841901   | 147204614                          | - 6011      |
| antisense              | STXBP5 antisense RNA 1 [Source:HGNC               |             |                                    |             |
| Symbol;Acc:HGNC:44183] | -                                                 | 69 161      | 50 267                             | 233         |
| 163                    | 0.627764967                                       | 1.180899955 | 0.385323709                        |             |
| 2.147661095            | 1.68914834                                        | 1.265863601 |                                    |             |
| ENSG00000157985        | 968.3769226                                       | 1028.915766 | 1053.088894                        |             |
| 1582.2107              | 1398.205612                                       | 1242.218848 | 1016.793861                        |             |
| 1407.545053            | -0.468847584                                      | 0.00275433  | 0.023378925                        | AGAP1       |
| 2                      | 235494089                                         | 236131800   | + 13910                            |             |
| protein_coding         | "ArfGAP with GTPase domain, ankyrin repeat and PH |             |                                    |             |
| domain 1 [Source:HGNC  | Symbol;Acc:HGNC:16922]"                           | -           | 837 1110                           |             |
| 1077                   | 1575 1530                                         | 1266        | 3.290735988                        | 3.518275198 |
| 3.58666677             | 5.474628382                                       | 4.79317073  | 4.248666198                        |             |
| ENSG00000146109        | 772.8503994                                       | 833.3290756 | 733.3488121                        |             |
| 1119.100139            | 1079.268515                                       | 1036.163589 | 779.8427624                        |             |
| 1078.177414            | -0.467140862                                      | 0.002758369 | 0.023389308                        | ABT1        |
| 6                      | 26596952                                          | 26600744    | + 2949                             |             |
| protein_coding         | activator of basal transcription 1 [Source:HGNC   |             |                                    |             |
| Symbol;Acc:HGNC:17369] | -                                                 | 668 899     | 750 1114                           | 1181        |
| 1056                   | 12.38786325                                       | 13.44060683 | 11.78118421                        |             |
| 18.26466179            | 17.45153862                                       | 16.7161085  |                                    |             |
| ENSG00000165389        | 1278.442652                                       | 1030.769669 | 1135.223961                        |             |
| 752.4290883            | 897.4103996                                       | 789.8784932 | 1148.145427                        |             |
| 813.239327             | 0.496753211                                       | 0.002758613 | 0.023389308                        | SPTSSA      |
| 14                     | 34432789                                          | 34462356    | - 2777                             |             |
| protein_coding         | serine palmitoyltransferase small subunit A       |             |                                    |             |
| [Source:HGNC           | Symbol;Acc:HGNC:20361]                            | -           | 1105 1112                          | 1161        |
| 749                    | 982 805                                           | 21.76111334 | 17.65480258                        |             |
| 19.36684139            | 13.04088768                                       | 15.40970078 | 13.53212611                        |             |
| ENSG00000207181        | 10.41265508                                       | 11.12341369 | 9.777984162                        | 0           |
| 0                      | 0                                                 | 10.43801764 | 0                                  | 5.876780711 |
| 0.002762441            | 1                                                 | SNORA14B    | 1                                  | 235127803   |
| 235127937              | -                                                 | 135         | snoRNA "small nucleolar RNA, H/ACA |             |
| box 14B [Source:HGNC   | Symbol;Acc:HGNC:32603]"                           | -           | 9 12                               |             |
| 10                     | 0 0                                               | 0           | 3.645889095                        | 3.919055696 |
| 3.431378986            | 0                                                 | 0           | 0                                  |             |
| ENSG00000014138        | 369.0707746                                       | 291.9896094 | 351.0296314                        |             |
| 152.6958897            | 229.3788292                                       | 208.9989056 | 337.3633384                        |             |
| 197.0245415            | 0.774405275                                       | 0.002764897 | 0.023429594                        | POLA2       |
| 11                     | 65261762                                          | 65305589    | + 5726                             |             |
| protein_coding         | "DNA polymerase alpha 2, accessory subunit        |             |                                    |             |

|                                      |                                                  |             |             |        |
|--------------------------------------|--------------------------------------------------|-------------|-------------|--------|
| [Source:HGNC Symbol;Acc:HGNC:30073]" | -                                                | 319         | 315         | 359    |
| 152                                  | 251 213                                          | 3.046730584 | 2.425454702 |        |
| 2.904327324                          | 1.283492871                                      | 1.91020939  | 1.736498033 |        |
| ENSG00000077514                      | 1696.105817                                      | 1753.791558 | 1585.989031 |        |
| 1022.66063                           | 1401.861052                                      | 1187.270779 | 1678.628802 |        |
| 1203.93082                           | 0.479223926                                      | 0.002788519 | 0.02361667  | POLD3  |
| 11                                   | 74493851                                         | 74669117    | + 5508      |        |
| protein_coding                       | "DNA polymerase delta 3, accessory subunit       |             |             |        |
| [Source:HGNC Symbol;Acc:HGNC:20932]" | -                                                | 1466        | 1892        | 1622   |
| 1018                                 | 1534 1210                                        | 14.55575548 | 15.14471686 |        |
| 13.64141352                          | 8.936244914                                      | 12.13640402 | 10.25504274 |        |
| ENSG00000121895                      | 10.41265508                                      | 12.97731597 | 12.71137941 |        |
| 93.42577465                          | 45.69299387                                      | 20.60552591 | 12.03378349 |        |
| 53.24143148                          | -2.141989303                                     | 0.002807849 | 0.023767214 |        |
| TMEM156                              | 4 38966744                                       | 39032922    | - 2562      |        |
| protein_coding                       | transmembrane protein 156 [Source:HGNC           |             |             |        |
| Symbol;Acc:HGNC:26260]               | -                                                | 9 14        | 13 93       | 50     |
| 21                                   | 0.192113594                                      | 0.240925555 | 0.235053479 |        |
| 1.755112825                          | 0.850451354                                      | 0.382636332 |             |        |
| ENSG00000182134                      | 311.2226908                                      | 282.720098  | 260.0943787 |        |
| 564.5729608                          | 427.6864226                                      | 384.6364836 | 284.6790558 |        |
| 458.965289                           | -0.689502528                                     | 0.002815866 | 0.023820173 | TDRKH  |
| 1                                    | 151770107                                        | 151791416   | - 5092      |        |
| protein_coding                       | tudor and KH domain containing [Source:HGNC      |             |             |        |
| Symbol;Acc:HGNC:11713]               | -                                                | 269 305     | 266 562     | 468    |
| 392                                  | 2.889073547                                      | 2.640860145 | 2.419890404 |        |
| 5.336409358                          | 4.005124824                                      | 3.593715625 |             |        |
| ENSG00000136628                      | 6529.891698                                      | 5903.751816 | 6334.17814  |        |
| 5132.390136                          | 4729.224866                                      | 4818.749416 | 6255.940551 |        |
| 4893.454806                          | 0.354324971                                      | 0.002817222 | 0.023820173 | EPRS   |
| 1                                    | 219968601                                        | 220046658   | - 5450      |        |
| protein_coding                       | glutamyl-prolyl-tRNA synthetase [Source:HGNC     |             |             |        |
| Symbol;Acc:HGNC:3418]                | -                                                | 5644 6369   | 6478 5109   | 5175   |
| 4911                                 | 56.63504052                                      | 51.52389714 | 55.06135532 |        |
| 45.32529265                          | 41.37828148                                      | 42.06486192 |             |        |
| ENSG00000166250                      | 6491.711962                                      | 6118.804481 | 4056.885629 |        |
| 7538.354978                          | 8671.616377                                      | 7397.383801 | 5555.800691 |        |
| 7869.118385                          | -0.502336863                                     | 0.002822927 | 0.023854555 | CLMP   |
| 11                                   | 123069865                                        | 123195281   | - 5097      |        |
| protein_coding                       | CXADR like membrane protein [Source:HGNC         |             |             |        |
| Symbol;Acc:HGNC:24039]               | -                                                | 5611 6601   | 4149 7504   | 9489   |
| 7539                                 | 60.20330699                                      | 57.09907294 | 37.70780539 |        |
| 71.18351154                          | 81.12681214                                      | 69.04705274 |             |        |
| ENSG00000134247                      | 1507.521063                                      | 1087.313688 | 2020.131528 |        |
| 1134.168813                          | 868.1668835                                      | 984.159166  | 1538.322093 |        |
| 995.4982874                          | 0.627933699                                      | 0.002825196 | 0.023854555 | PTGFRN |
| 1                                    | 116910057                                        | 116990358   | + 6352      |        |
| protein_coding                       | prostaglandin F2 receptor inhibitor [Source:HGNC |             |             |        |
| Symbol;Acc:HGNC:9601]                | -                                                | 1303 1173   | 2066 1129   | 950    |
| 1003                                 | 11.21834105                                      | 8.141819699 | 15.06684372 |        |



|                        |                                                        |             |             |             |                |
|------------------------|--------------------------------------------------------|-------------|-------------|-------------|----------------|
| 8.593788655            | 6.517360042                                            | 7.371170884 |             |             |                |
| ENSG00000107874        | 828.3845598                                            | 1016.865402 | 995.3987877 |             |                |
| 1235.631213            | 1372.617536                                            | 1327.584598 | 946.8829163 |             |                |
| 1311.944449            | -0.469806635                                           | 0.002827318 | 0.023854555 |             | CUEDC2         |
| 10                     | 102423245                                              | 102432661   | -           | 1412        |                |
| protein_coding         | CUE domain containing 2 [Source:HGNC                   |             |             |             |                |
| Symbol;Acc:HGNC:28352] | -                                                      | 716         | 1097        | 1018        | 1230           |
| 1353                   | 27.73147938                                            | 34.25357373 | 33.39762139 |             | 1502           |
| 42.11837735            | 46.35470629                                            | 44.73105442 |             |             |                |
| ENSG00000165644        | 86.77212568                                            | 155.7277917 | 158.4033434 |             |                |
| 53.24264577            | 45.69299387                                            | 72.60994844 | 133.6344203 |             |                |
| 57.18186269            | 1.227633813                                            | 0.00282753  | 0.023854555 |             | COMTD1         |
| 10                     | 75233969                                               | 75236030    | -           | 1580        |                |
| protein_coding         | catechol-O-methyltransferase domain containing 1       |             |             |             |                |
| [Source:HGNC           | Symbol;Acc:HGNC:26309]                                 | -           | 75          | 168         | 162            |
| 53                     | 50                                                     | 74          | 2.595965337 | 4.687984345 |                |
| 4.749636609            | 1.621884783                                            | 1.379023018 | 2.186354942 |             |                |
| ENSG00000214530        | 637.4858833                                            | 627.5459224 | 662.9473262 |             |                |
| 817.7266727            | 975.0884892                                            | 927.2486659 | 642.6597106 |             |                |
| 906.6879426            | -0.496741448                                           | 0.002841348 | 0.023957907 |             |                |
| STARD10                | 11                                                     | 72754729    | 72793681    | -           | 3710           |
| protein_coding         | StAR related lipid transfer domain containing 10       |             |             |             |                |
| [Source:HGNC           | Symbol;Acc:HGNC:10666]                                 | -           | 551         | 677         | 678            |
| 814                    | 1067                                                   | 945         | 8.122176112 | 8.045419931 |                |
| 8.465609666            | 10.60844458                                            | 12.53282881 | 11.89060452 |             |                |
| ENSG00000125885        | 1434.632478                                            | 1395.988418 | 1698.435849 |             |                |
| 1249.695308            | 860.8560045                                            | 1039.107235 | 1509.685582 |             |                |
| 1049.886183            | 0.524426873                                            | 0.002847638 | 0.023997706 |             | MCM8           |
| 20                     | 5950652                                                | 5998977     | +           | 7691        | protein_coding |
| minichromosome         | maintenance 8 homologous recombination repair factor   |             |             |             |                |
| [Source:HGNC           | Symbol;Acc:HGNC:16147]                                 | -           | 1240        | 1506        | 1737           |
| 1244                   | 942                                                    | 1059        | 8.817258767 | 8.633285805 |                |
| 10.46211436            | 7.820576804                                            | 5.337362367 | 6.427753072 |             |                |
| ENSG00000134318        | 2353.260048                                            | 2143.111038 | 2516.853123 |             |                |
| 1756.002732            | 1741.816926                                            | 1809.361418 | 2337.741403 |             |                |
| 1769.060359            | 0.402064135                                            | 0.002864303 | 0.024124846 |             | ROCK2          |
| 2                      | 11179761                                               | 11348330    | -           | 10145       |                |
| protein_coding         | Rho associated coiled-coil containing protein kinase 2 |             |             |             |                |
| [Source:HGNC           | Symbol;Acc:HGNC:10252]                                 | -           | 2034        | 2312        | 2574           |
| 1748                   | 1906                                                   | 1844        | 10.96462063 | 10.04777118 |                |
| 11.75327633            | 8.330874525                                            | 8.187087702 | 8.485059678 |             |                |
| ENSG00000172061        | 83.30124065                                            | 44.49365476 | 132.0027862 |             |                |
| 7.032047554            | 42.03755436                                            | 19.62431039 | 86.5992272  |             |                |
| 22.89797077            | 1.913910379                                            | 0.002865914 | 0.024125123 |             | LRRC15         |
| 3                      | 194355247                                              | 194369743   | -           | 5940        |                |
| protein_coding         | leucine rich repeat containing 15 [Source:HGNC         |             |             |             |                |
| Symbol;Acc:HGNC:20818] | -                                                      | 72          | 48          | 135         | 7              |
| 20                     | 0.662888926                                            | 0.356277791 | 1.052809462 |             | 46             |
| 0.056978736            | 0.337465969                                            | 0.157177214 |             |             |                |
| ENSG00000158710        | 31807.19039                                            | 37426.57926 | 39583.23548 |             |                |

|                                                          |                                                  |             |                   |             |
|----------------------------------------------------------|--------------------------------------------------|-------------|-------------------|-------------|
| 21004.72604                                              | 27897.40048                                      | 30588.4126  | 36272.33504       |             |
| 26496.84638                                              | 0.453058468                                      | 0.002873639 | 0.024176844       | TAGLN2      |
| 1                                                        | 159918107                                        | 159925732   | - 2487            |             |
| protein_coding                                           | transgelin 2 [Source:HGNC Symbol;Acc:HGNC:11554] |             |                   |             |
| -                                                        | 27492 40376                                      | 40482 20909 | 30527 31174       |             |
| 604.5403077                                              | 715.7831398                                      | 754.0300103 | 406.4982627       |             |
| 534.8930304                                              | 585.1440343                                      |             |                   |             |
| ENSG00000006459                                          | 178.1720981                                      | 171.4859611 | 88.97965587       |             |
| 248.1308208                                              | 342.697454                                       | 254.1348195 | 146.2125717       |             |
| 281.6543648                                              | -0.947597228                                     | 0.002878795 | 0.0242069         | KDM7A       |
| 7                                                        | 140084746                                        | 140177035   | - 9430            |             |
| protein_coding                                           | lysine demethylase 7A [Source:HGNC               |             |                   |             |
| Symbol;Acc:HGNC:22224]                                   | -                                                | 154 185     | 91 247            | 375         |
| 259                                                      | 0.893107509                                      | 0.864955956 | 0.447025354       |             |
| 1.266445418                                              | 1.732918638                                      | 1.282136037 |                   |             |
| ENSG00000140740                                          | 1961.05004                                       | 1963.282516 | 2314.448851       |             |
| 1646.503706                                              | 1477.711422                                      | 1521.865271 | 2079.593803       |             |
| 1548.693466                                              | 0.425461769                                      | 0.002890518 | 0.024292111       | UQCRC2      |
| 16                                                       | 21952660                                         | 21983660    | + 5217            |             |
| protein_coding                                           | ubiquinol-cytochrome c reductase core protein 2  |             |                   |             |
| [Source:HGNC Symbol;Acc:HGNC:12586]                      | -                                                |             | 1695 2118         | 2367        |
| 1639                                                     | 1617 1551                                        | 17.76820591 | 17.89942488       |             |
| 21.01744294                                              | 15.19005454                                      | 13.50665419 | 13.87832319       |             |
| ENSG00000140988                                          | 25878.91876                                      | 33251.59132 | 33231.45697       |             |
| 36762.54003                                              | 39879.93119                                      | 47536.94827 | 30787.32235       |             |
| 41393.13983                                              | -0.427021212                                     | 0.002918587 | 0.024508912       | RPS2        |
| 16                                                       | 1962052 1964860                                  | - 2413      | protein_coding    |             |
| ribosomal protein S2 [Source:HGNC Symbol;Acc:HGNC:10404] |                                                  |             | -                 |             |
| 22368                                                    | 35872 33986                                      | 36595 43639 | 48447 506.9493201 |             |
| 655.4389211                                              | 652.4469225                                      | 733.272919  | 788.090452        |             |
| 937.2503325                                              |                                                  |             |                   |             |
| ENSG00000213918                                          | 478.9821337                                      | 368.9265541 | 479.1212239       |             |
| 817.7266727                                              | 656.151392                                       | 573.0298634 | 442.3433039       |             |
| 682.3026427                                              | -0.625866888                                     | 0.002919522 | 0.024508912       | DNASE1      |
| 16                                                       | 3611728 3680143                                  | + 13801     | protein_coding    |             |
| deoxyribonuclease 1 [Source:HGNC Symbol;Acc:HGNC:2956]   | -                                                |             |                   | 414         |
| 398                                                      | 490 814                                          | 718 584     | 1.640531214       |             |
| 1.271471044                                              | 1.644704876                                      | 2.851773739 | 2.267109444       |             |
| 1.975369423                                              |                                                  |             |                   |             |
| ENSG00000143643                                          | 913.9997238                                      | 922.3163851 | 1068.733669       |             |
| 772.5206527                                              | 587.6119012                                      | 656.4331825 | 968.3499259       |             |
| 672.1885788                                              | 0.527205462                                      | 0.002927363 | 0.024561151       | TTC13       |
| 1                                                        | 230906243                                        | 230978875   | - 4212            |             |
| protein_coding                                           | tetratricopeptide repeat domain 13 [Source:HGNC  |             |                   |             |
| Symbol;Acc:HGNC:26204]                                   | -                                                | 790 995     | 1093 769          | 643         |
| 669                                                      | 10.25730906                                      | 10.41522547 | 12.02082446       |             |
| 8.827529829                                              | 6.652443706                                      | 7.414532806 |                   |             |
| ENSG00000159217                                          | 5.784808379                                      | 13.90426711 | 11.73358099       | 0           |
| 0                                                        | 0                                                | 10.47421883 | 0                 | 5.884048582 |
| 0.002927849                                              | 1                                                | IGF2BP1 17  | 48997412          | 49055650    |

|                        |                                               |                                     |                                  |                              |             |      |             |  |
|------------------------|-----------------------------------------------|-------------------------------------|----------------------------------|------------------------------|-------------|------|-------------|--|
|                        | +                                             | 9109                                | protein_coding                   | insulin like growth factor 2 |             |      |             |  |
| mRNA binding protein 1 |                                               | [Source:HGNC Symbol;Acc:HGNC:28866] |                                  | -                            |             |      |             |  |
|                        | 5                                             | 15                                  | 12                               | 0                            | 0           | 0    | 0.030018848 |  |
|                        | 0.072602991                                   | 0.061025732                         | 0                                | 0                            | 0           | 0    |             |  |
| ENSG00000198746        | 259.1594154                                   | 342.9719221                         | 389.1637696                      |                              |             |      |             |  |
| 578.6370559            | 473.3794165                                   | 519.0630098                         | 330.4317024                      |                              |             |      |             |  |
| 523.6931607            | -0.662526095                                  | 0.002928958                         | 0.024561151                      |                              |             |      |             |  |
| GPATCH3 1              | 26890488                                      | 26900466                            | -                                | 2225                         |             |      |             |  |
| protein_coding         | G-patch domain containing 3                   | [Source:HGNC                        |                                  |                              |             |      |             |  |
| Symbol;Acc:HGNC:25720] | -                                             | 224                                 | 370                              | 398                          | 576         | 518  |             |  |
|                        | 529                                           | 5.505702185                         | 7.331716555                      | 8.286201929                  |             |      |             |  |
| 12.51681071            | 10.14514695                                   | 11.09868927                         |                                  |                              |             |      |             |  |
| ENSG00000182004        | 1933.28296                                    | 2069.881898                         | 2068.04365                       |                              |             |      |             |  |
| 1537.00468             | 1467.658963                                   | 1601.343728                         | 2023.736169                      |                              |             |      |             |  |
| 1535.33579             | 0.398707572                                   | 0.002943773                         | 0.024671855                      | SNRPE                        |             |      |             |  |
| 1                      | 203861603                                     | 203870550                           | +                                | 1474                         |             |      |             |  |
| protein_coding         | small nuclear ribonucleoprotein polypeptide E | [Source:HGNC Symbol;Acc:HGNC:11161] | -                                | 1671                         | 2233        | 2115 |             |  |
|                        | 1530                                          | 1606                                | 1632                             | 61.99742889                  | 66.79211526 |      |             |  |
| 66.46841825            | 50.18745391                                   | 47.47955667                         | 51.68549819                      |                              |             |      |             |  |
| ENSG00000224081        | 18.51138681                                   | 5.561706845                         | 7.822387329                      | 0                            |             |      |             |  |
|                        | 0                                             | 10.631827                           | 0                                | 5.89945596                   |             |      |             |  |
| 0.002948641            | 1                                             | SLC44A3-AS1                         | 1                                | 94613814                     |             |      |             |  |
| 94855426               | -                                             | 10245                               | transcribed_processed_pseudogene |                              |             |      |             |  |
|                        | SLC44A3 antisense RNA 1                       | [Source:HGNC Symbol;Acc:HGNC:49057] |                                  |                              |             |      |             |  |
|                        | -                                             | 16                                  | 6                                | 8                            | 0           | 0    |             |  |
| 0.085408822            | 0.025821011                                   | 0.036172663                         | 0                                | 0                            | 0           | 0    |             |  |
| ENSG00000140320        | 437.3315134                                   | 781.4198117                         | 693.2590771                      |                              |             |      |             |  |
| 1123.118452            | 919.3430367                                   | 944.9105452                         | 637.3368007                      |                              |             |      |             |  |
| 995.7906781            | -0.642169755                                  | 0.002955887                         | 0.024759807                      | BAHD1                        |             |      |             |  |
| 15                     | 40439721                                      | 40468242                            | +                                | 5196                         |             |      |             |  |
| protein_coding         | bromo adjacent homology domain containing 1   | [Source:HGNC Symbol;Acc:HGNC:29153] | -                                | 378                          | 843         | 709  |             |  |
|                        | 1118                                          | 1006                                | 963                              | 3.97848175                   | 7.153068602 |      |             |  |
| 6.320909154            | 10.403366                                     | 8.43698809                          | 8.65173444                       |                              |             |      |             |  |
| ENSG00000048028        | 1050.521202                                   | 841.6716359                         | 858.5070094                      |                              |             |      |             |  |
| 524.3898319            | 667.1177105                                   | 683.9072171                         | 916.8999489                      |                              |             |      |             |  |
| 625.1382532            | 0.551690625                                   | 0.002958708                         | 0.024769864                      | USP28                        |             |      |             |  |
| 11                     | 113797874                                     | 113875570                           | -                                | 5719                         |             |      |             |  |
| protein_coding         | ubiquitin specific peptidase 28               | [Source:HGNC                        |                                  |                              |             |      |             |  |
| Symbol;Acc:HGNC:12625] | -                                             | 908                                 | 908                              | 878                          | 522         | 730  |             |  |
|                        | 697                                           | 8.682813338                         | 7.000026916                      | 7.111756447                  |             |      |             |  |
| 4.413179813            | 5.562389048                                   | 5.68929846                          |                                  |                              |             |      |             |  |
| ENSG00000112787        | 1801.389329                                   | 3205.397045                         | 3521.052097                      |                              |             |      |             |  |
| 4823.984622            | 3625.282134                                   | 4599.938355                         | 2842.612824                      |                              |             |      |             |  |
| 4349.735037            | -0.613264277                                  | 0.002960729                         | 0.024773216                      | FBRSL1                       |             |      |             |  |
| 12                     | 132489551                                     | 132585188                           | +                                | 9378                         |             |      |             |  |
| protein_coding         | fibrosin like 1                               | [Source:HGNC Symbol;Acc:HGNC:29308] |                                  |                              |             |      |             |  |
|                        | -                                             | 1557                                | 3458                             | 3601                         | 4802        | 3967 | 4688        |  |
| 9.0797334              | 16.25731118                                   | 17.78751784                         | 24.75786234                      |                              |             |      |             |  |

|                        |                                                  |             |             |             |      |        |
|------------------------|--------------------------------------------------|-------------|-------------|-------------|------|--------|
| 18.43361743            | 23.3358385                                       |             |             |             |      |        |
| ENSG00000253719        | 1689.164047                                      | 1666.658151 | 1730.703197 |             |      |        |
| 2334.639788            | 2494.837465                                      | 1988.923858 | 1695.508465 |             |      |        |
| 2272.80037             | -0.422843804                                     | 0.002966132 | 0.024804851 |             |      |        |
| ATXN7L3B               | 12                                               | 74537827    | 74545430    | +           |      | 7604   |
| protein_coding         | ataxin 7 like 3B [Source:HGNC                    |             |             |             |      |        |
| Symbol;Acc:HGNC:37931] | -                                                | 1460        | 1798        | 1770        | 2324 | 2730   |
| 2027                   | 10.50039074                                      | 10.42513139 | 10.78285125 |             |      |        |
| 14.77730483            | 15.64512857                                      | 12.44393335 |             |             |      |        |
| ENSG00000189057        | 2014.270277                                      | 1333.882692 | 1443.230462 |             |      |        |
| 1131.155078            | 1155.118885                                      | 1025.370218 | 1597.12781  |             |      |        |
| 1103.881394            | 0.532125745                                      | 0.002985386 | 0.024952215 |             |      |        |
| FAM111B 11             | 59107185                                         | 59127410    | +           | 3863        |      |        |
| protein_coding         | family with sequence similarity 111 member B     |             |             |             |      |        |
| [Source:HGNC           | Symbol;Acc:HGNC:24200]                           | -           | 1741        | 1439        |      | 1476   |
| 1126                   | 1264                                             | 1045        | 24.64726734 | 16.42366371 |      |        |
| 17.69962663            | 14.09337146                                      | 14.25873388 | 12.62808854 |             |      |        |
| ENSG00000125384        | 57.84808379                                      | 112.161088  | 105.6022289 |             |      |        |
| 44.20144177            | 10.05245865                                      | 31.39889662 | 91.87046692 |             |      |        |
| 28.55093235            | 1.69177658                                       | 0.002987438 | 0.024955714 |             |      | PTGER2 |
| 14                     | 52314305                                         | 52328606    | +           | 2473        |      |        |
| protein_coding         | prostaglandin E receptor 2 [Source:HGNC          |             |             |             |      |        |
| Symbol;Acc:HGNC:9594]  | -                                                | 50          | 121         | 108         | 44   | 11     |
| 32                     | 1.105708379                                      | 2.157223844 | 2.023028937 |             |      |        |
| 0.860260093            | 0.193832754                                      | 0.604048622 |             |             |      |        |
| ENSG00000048471        | 728.8858557                                      | 720.2410364 | 681.5254961 |             |      |        |
| 949.3264198            | 1013.470604                                      | 979.2530884 | 710.2174627 |             |      |        |
| 980.6833708            | -0.46575957                                      | 0.002992902 | 0.024977054 |             |      | SNX29  |
| 16                     | 11976737                                         | 12574289    | +           | 11298       |      |        |
| protein_coding         | sorting nexin 29 [Source:HGNC                    |             |             |             |      |        |
| Symbol;Acc:HGNC:30542] | -                                                | 630         | 777         | 697         | 945  | 1109   |
| 3.049535489            | 3.032169021                                      | 2.857812053 | 4.044189103 |             |      |        |
| 4.277485771            | 4.123585528                                      |             |             |             |      |        |
| ENSG00000001461        | 481.2960571                                      | 572.855805  | 325.6068726 |             |      |        |
| 710.236803             | 753.020539                                       | 707.4563895 | 459.9195782 |             |      |        |
| 723.5712438            | -0.65368744                                      | 0.00299326  | 0.024977054 |             |      | NIPAL3 |
| 1                      | 24415794                                         | 24472976    | +           | 9404        |      |        |
| protein_coding         | NIPA like domain containing 3 [Source:HGNC       |             |             |             |      |        |
| Symbol;Acc:HGNC:25233] | -                                                | 416         | 618         | 333         | 707  | 824    |
| 721                    | 2.419220327                                      | 2.897409052 | 1.640340731 |             |      |        |
| 3.635030087            | 3.81832762                                       | 3.579057536 |             |             |      |        |
| ENSG00000164294        | 1607.019768                                      | 1154.05417  | 1416.829905 |             |      |        |
| 782.566435             | 1152.377305                                      | 888.0000451 | 1392.634614 |             |      |        |
| 940.9812618            | 0.564724502                                      | 0.002998958 | 0.025010951 |             |      | GPX8   |
| 5                      | 55160118                                         | 55167071    | +           | 3868        |      |        |
| protein_coding         | glutathione peroxidase 8 (putative) [Source:HGNC |             |             |             |      |        |
| Symbol;Acc:HGNC:33100] | -                                                | 1389        | 1245        | 1449        | 779  | 1261   |
| 905                    | 19.63859858                                      | 14.19112561 | 17.35339194 |             |      |        |
| 9.737606235            | 14.20650403                                      | 10.92215033 |             |             |      |        |
| ENSG00000273449        | 48.59239038                                      | 39.85889906 | 33.24514615 |             |      |        |

|                          |                                                      |                                     |             |             |                     |
|--------------------------|------------------------------------------------------|-------------------------------------|-------------|-------------|---------------------|
| 7.032047554              | 0                                                    | 11.77458623                         | 40.56547853 | 6.268877929 |                     |
|                          | 2.701433031                                          | 0.003002836                         | 0.025024049 | AC093788.1  |                     |
|                          | 4                                                    | 163529771                           | 163530697   | +           | 927                 |
| lincRNA novel transcript |                                                      | -                                   | 42          | 43          | 34 7                |
|                          | 0                                                    | 12                                  | 2.477788706 | 2.045138288 | 1.699032314         |
|                          | 0.365106464                                          | 0                                   | 0.604292978 |             |                     |
| ENSG00000104723          | 56.69112211                                          | 65.813531                           | 29.33395248 |             |                     |
| 150.6867333              | 283.296562                                           | 41.21105182                         | 50.61286853 |             |                     |
| 158.3981157              | -1.646990023                                         | 0.003005567                         | 0.025024049 | TUSC3       |                     |
|                          | 8                                                    | 15417215                            | 15766649    | +           | 5190                |
| protein_coding           | tumor suppressor candidate 3                         | [Source:HGNC                        |             |             |                     |
| Symbol;Acc:HGNC:30242]   | -                                                    | 49                                  | 71          | 30          | 150 310             |
|                          | 42                                                   | 0.516325334                         | 0.603149468 | 0.267766568 |                     |
| 1.397414089              | 2.602872732                                          | 0.377770437                         |             |             |                     |
| ENSG00000145362          | 646.7415767                                          | 698.9211602                         | 485.9658128 |             |                     |
| 1028.688099              | 775.8670359                                          | 945.8917608                         | 610.5428499 |             |                     |
| 916.815632               | -0.586377304                                         | 0.003006255                         | 0.025024049 | ANK2        |                     |
|                          | 4                                                    | 112818109                           | 113383740   | +           | 18224               |
| protein_coding           | ankyrin 2                                            | [Source:HGNC Symbol;Acc:HGNC:493]   |             |             |                     |
|                          | 559                                                  | 754                                 | 497         | 1024        | 849 964 1.677501101 |
|                          | 1.824154408                                          | 1.263325138                         | 2.716798735 | 2.030124074 |                     |
|                          | 2.469331309                                          |                                     |             |             |                     |
| ENSG00000114126          | 2340.53347                                           | 1941.035689                         | 2198.09084  |             |                     |
| 3299.034881              | 2641.055046                                          | 2801.370308                         | 2159.886666 |             |                     |
| 2913.820078              | -0.432146075                                         | 0.003007649                         | 0.025024049 | TFDP2       |                     |
|                          | 3                                                    | 141944428                           | 142149544   | -           | 11897               |
| protein_coding           | transcription factor Dp-2                            | [Source:HGNC                        |             |             |                     |
| Symbol;Acc:HGNC:11751]   | E2F                                                  | 2023                                | 2094        | 2248        | 3284 2890           |
|                          | 2855                                                 | 9.29936157                          | 7.760204636 | 8.753088129 |                     |
| 13.34648502              | 10.5856853                                           | 11.20249314                         |             |             |                     |
| ENSG00000179262          | 3205.940803                                          | 3980.328199                         | 3518.118701 |             |                     |
| 4748.641256              | 4510.812355                                          | 4745.158252                         | 3568.129235 |             |                     |
| 4668.203954              | -0.387414586                                         | 0.003008713                         | 0.025024049 | RAD23A      |                     |
|                          | 19                                                   | 12945855                            | 12953642    | +           | 2449                |
| protein_coding           | "RAD23 homolog A, nucleotide excision repair protein | [Source:HGNC Symbol;Acc:HGNC:9812]" |             |             |                     |
|                          | 4727                                                 | 4936                                | 4836        | 61.87888128 | 77.30493386 3598    |
| 68.05731788              | 93.32500754                                          | 87.83042083                         | 92.18145163 |             |                     |
| ENSG00000146416          | 732.3567407                                          | 574.7097073                         | 671.7475119 |             |                     |
| 401.8312888              | 506.2783721                                          | 406.2232251                         | 659.6046533 |             |                     |
| 438.110962               | 0.589149912                                          | 0.003026618                         | 0.02515928  | AIG1        |                     |
|                          | 6                                                    | 143060496                           | 143340304   | +           | 7677                |
| protein_coding           | androgen induced 1                                   | [Source:HGNC Symbol;Acc:HGNC:21607] |             |             |                     |
|                          | -                                                    | 633                                 | 620         | 687         | 400 554 414         |
| 4.509276666              | 3.560689524                                          | 4.145411542                         | 2.519240719 |             |                     |
| 3.14468263               | 2.51741512                                           |                                     |             |             |                     |
| ENSG00000188342          | 1846.510834                                          | 1738.96034                          | 1752.214762 |             |                     |
| 926.2211207              | 1388.153154                                          | 1400.194546                         | 1779.228645 |             |                     |
| 1238.189607              | 0.522681623                                          | 0.003047413                         | 0.025318367 | GTF2F2      |                     |
|                          | 13                                                   | 45120515                            | 45284909    | +           | 3619                |

|                                     |                                               |             |             |                      |      |        |  |
|-------------------------------------|-----------------------------------------------|-------------|-------------|----------------------|------|--------|--|
| protein_coding                      | general transcription factor IIF subunit 2    |             |             |                      |      |        |  |
| [Source:HGNC Symbol;Acc:HGNC:4653]  | -                                             | 1596        | 1876        |                      |      | 1792   |  |
| 922                                 | 1519                                          | 1427        | 24.11787371 | 22.85484124          |      |        |  |
| 22.93780614                         | 12.31809515                                   |             | 18.29059311 | 18.40693276          |      |        |  |
| ENSG00000068796                     | 1823.371601                                   |             | 1534.104138 | 1439.319269          |      |        |  |
| 1020.651474                         | 1347.029459                                   |             | 989.0652436 | 1598.931669          |      |        |  |
| 1118.915392                         | 0.514318435                                   |             | 0.003056155 | 0.025377206          |      | KIF2A  |  |
| 5                                   | 62306162                                      |             | 62537249    | +                    | 4774 |        |  |
| protein_coding                      | kinesin family member 2A [Source:HGNC         |             |             |                      |      |        |  |
| Symbol;Acc:HGNC:6318]               | -                                             | 1576        | 1655        | 1472                 | 1016 | 1474   |  |
| 1008                                | 18.05379519                                   |             | 15.28444035 | 14.28327675          |      |        |  |
| 10.28993212                         | 13.45468909                                   |             | 9.856532387 |                      |      |        |  |
| ENSG00000178700                     | 672.1947336                                   |             | 527.4351991 | 469.3432398          |      |        |  |
| 801.6534212                         | 870.9084632                                   |             | 790.8597087 | 556.3243908          |      |        |  |
| 821.140531                          | -0.563110381                                  |             | 0.003082254 | 0.025580031          |      | DHFR2  |  |
| 3                                   | 94047836                                      |             | 94063389    | -                    | 4659 |        |  |
| protein_coding                      | dihydrofolate reductase 2 [Source:HGNC        |             |             |                      |      |        |  |
| Symbol;Acc:HGNC:27309]              | -                                             | 581         | 569         | 480                  | 798  | 953    |  |
| 806                                 | 6.81990201                                    |             | 5.384600831 | 4.772555448          |      |        |  |
| 8.281545598                         | 8.913715898                                   |             | 8.075852294 |                      |      |        |  |
| ENSG00000104635                     | 5570.770469                                   |             | 5810.129751 | 6115.151295          |      |        |  |
| 4229.274315                         | 3872.024301                                   |             | 5095.452193 | 5832.017171          |      |        |  |
| 4398.916936                         | 0.40695127                                    |             | 0.003094087 | 0.025664305          |      |        |  |
| SLC39A14                            | 8                                             | 22367249    | 22434129    | +                    |      | 6942   |  |
| protein_coding                      | solute carrier family 39 member 14            |             |             |                      |      |        |  |
| [Source:HGNC Symbol;Acc:HGNC:20858] | -                                             | 4815        | 6268        |                      |      | 6254   |  |
| 4210                                | 4237                                          | 5193        | 37.93205703 | 39.80873126          |      |        |  |
| 41.73262697                         | 29.32234525                                   |             | 26.5969877  | 34.92044337          |      |        |  |
| ENSG00000087301                     | 135.3645161                                   |             | 118.649746  | 184.8039007          |      |        |  |
| 77.3525231                          | 53.91773277                                   |             | 73.59116396 | 146.2727209          |      |        |  |
| 68.28713994                         | 1.100278404                                   |             | 0.003106574 | 0.0257539            |      |        |  |
| TXNDC16 14                          | 52430590                                      |             | 52552522    | -                    | 4739 |        |  |
| protein_coding                      | thioredoxin domain containing 16 [Source:HGNC |             |             |                      |      |        |  |
| Symbol;Acc:HGNC:19965]              | -                                             | 117         | 128         | 189                  | 77   | 59     |  |
| 75                                  | 1.350186825                                   |             | 1.190850433 | 1.847470665          |      |        |  |
| 0.785606798                         | 0.542530178                                   |             | 0.738789289 |                      |      |        |  |
| ENSG00000249786                     | 10.41265508                                   |             | 14.83121825 | 5.866790497          |      | 0      |  |
| 0                                   | 0                                             | 10.37022128 | 0           | 5.867806297          |      |        |  |
| 0.003108751                         | 1                                             | EAF1-AS1    | 3           | 15436171             |      |        |  |
| 15455940                            | -                                             | 4321        | antisense   | EAF1 antisense RNA 1 |      |        |  |
| [Source:HGNC Symbol;Acc:HGNC:42328] | -                                             | 9           | 16          | 6                    |      |        |  |
| 0                                   | 0                                             | 0           | 0.113907667 | 0.163256197          |      |        |  |
| 0.064323466                         | 0                                             | 0           | 0           |                      |      |        |  |
| ENSG00000183309                     | 1447.359056                                   |             | 1394.134516 | 1388.473751          |      |        |  |
| 2023.220539                         | 1666.880416                                   |             | 1999.717229 | 1409.989108          |      |        |  |
| 1896.606061                         | -0.427690521                                  |             | 0.003112227 | 0.025786787          |      | ZNF623 |  |
| 8                                   | 143636013                                     |             | 143656418   | +                    | 7146 |        |  |
| protein_coding                      | zinc finger protein 623 [Source:HGNC          |             |             |                      |      |        |  |
| Symbol;Acc:HGNC:29084]              | zf-C2H2                                       | 1251        | 1504        | 1420                 | 2014 | 1824   |  |
| 2038                                | 9.573902725                                   |             | 9.279376207 | 9.205084686          |      |        |  |

|                                                                      |                                                                                                          |             |                          |                |             |             |     |
|----------------------------------------------------------------------|----------------------------------------------------------------------------------------------------------|-------------|--------------------------|----------------|-------------|-------------|-----|
| 13.62691889                                                          | 11.12296114                                                                                              | 13.31334553 |                          |                |             |             |     |
| ENSG00000261117                                                      | 16.19746346                                                                                              | 14.83121825 | 1.955596832              | 0              |             |             |     |
| 0                                                                    | 0                                                                                                        | 10.99475952 | 0                        | 5.950169243    |             |             |     |
| 0.003119578                                                          | 1                                                                                                        | AC009486.1  | 2                        | 12715415       |             |             |     |
| 12716227                                                             | +                                                                                                        | 813         | lincRNA novel transcript | -              |             |             |     |
| 14                                                                   | 16                                                                                                       | 2           | 0                        | 0              | 0.941742571 |             |     |
| 0.867687608                                                          | 0.113957236                                                                                              | 0           | 0                        | 0              |             |             |     |
| ENSG00000170860                                                      | 1925.184228                                                                                              | 1480.340972 | 1716.03622               |                |             |             |     |
| 1052.797977                                                          | 1206.295038                                                                                              | 1384.495098 | 1707.18714               |                |             |             |     |
| 1214.529371                                                          | 0.490749523                                                                                              | 0.003128272 | 0.025905683              | LSM3           |             |             |     |
| 3                                                                    | 14178358                                                                                                 | 14201119    | +                        | 3815           |             |             |     |
| protein_coding                                                       | "LSM3 homolog, U6 small nuclear RNA and mRNA degradation associated [Source:HGNC Symbol;Acc:HGNC:17874]" |             |                          |                |             | -           |     |
| 1664                                                                 | 1597                                                                                                     | 1755        | 1048                     | 1320           | 1411        | 23.85357584 |     |
| 18.45628687                                                          | 21.31007775                                                                                              | 13.28213704 | 15.07780029              |                |             |             |     |
| 17.26547406                                                          |                                                                                                          |             |                          |                |             |             |     |
| ENSG00000146757                                                      | 360.9720428                                                                                              | 329.067655  | 335.3848567              |                |             |             |     |
| 174.7966106                                                          | 223.89567                                                                                                | 228.623216  | 341.8081849              |                |             |             |     |
| 209.1051655                                                          | 0.70807762                                                                                               | 0.003134614 | 0.025934641              | ZNF92          |             |             |     |
| 7                                                                    | 65373799                                                                                                 | 65401135    | +                        | 3512           |             |             |     |
| protein_coding                                                       | zinc finger protein 92 [Source:HGNC Symbol;Acc:HGNC:13168] zf-C2H2                                       |             |                          |                |             | 312         | 355 |
| 233                                                                  | 4.858417132                                                                                              | 4.456642564 | 4.524202846              |                |             | 245         |     |
| 2.395498799                                                          | 3.039976139                                                                                              | 3.097044529 |                          |                |             |             |     |
| ENSG00000097046                                                      | 783.2630545                                                                                              | 738.7800593 | 786.1499266              |                |             |             |     |
| 497.2662199                                                          | 564.7654042                                                                                              | 561.2552771 | 769.3976801              |                |             |             |     |
| 541.0956338                                                          | 0.507489669                                                                                              | 0.003135162 | 0.025934641              | CDC7           |             |             |     |
| 1                                                                    | 91500893                                                                                                 | 91525764    | +                        | 3557           |             |             |     |
| protein_coding                                                       | cell division cycle 7 [Source:HGNC Symbol;Acc:HGNC:1745]                                                 |             |                          |                |             | -           | 677 |
| 572                                                                  | 10.40877249                                                                                              | 9.878896017 | 10.47067403              |                |             | 618         |     |
| 6.728566519                                                          | 7.571173659                                                                                              | 7.506857976 |                          |                |             |             |     |
| ENSG00000157693                                                      | 463.941632                                                                                               | 453.2791079 | 467.3876429              |                |             |             |     |
| 773.525231                                                           | 710.9829846                                                                                              | 568.1237858 | 461.5361276              |                |             |             |     |
| 684.2106671                                                          | -0.568057499                                                                                             | 0.00315958  | 0.026121888              |                |             |             |     |
| TMEM268                                                              | 9                                                                                                        | 114611206   | 114646422                | +              | 4792        |             |     |
| protein_coding                                                       | transmembrane protein 268 [Source:HGNC Symbol;Acc:HGNC:24513]                                            |             |                          |                |             | -           | 401 |
| 579                                                                  | 4.576382076                                                                                              | 4.499103745 | 4.620761393              |                |             | 778         |     |
| 7.769179084                                                          | 7.074917588                                                                                              | 5.640372548 |                          |                |             |             |     |
| ENSG00000033122                                                      | 15.04050178                                                                                              | 29.66243651 | 37.15633981              |                |             |             |     |
| 7.032047554                                                          | 0.913859877                                                                                              | 0           | 27.28642604              | 2.648635811    |             |             |     |
| 3.380464723                                                          | 0.003161215                                                                                              | 0.026121888 | LRRC7                    | 1              |             |             |     |
| 69568398                                                             | 70151945                                                                                                 | +           | 14652                    | protein_coding |             |             |     |
| leucine rich repeat containing 7 [Source:HGNC Symbol;Acc:HGNC:18531] | -                                                                                                        |             |                          |                |             | 13          | 32  |
| 0                                                                    | 0.048522275                                                                                              | 0.096291295 | 0.120140419              |                |             | 1           |     |
| 0.023099488                                                          | 0.002974142                                                                                              | 0           |                          |                |             |             |     |
| ENSG00000101544                                                      | 1351.331237                                                                                              | 1364.472079 | 1507.765158              |                |             |             |     |
| 2079.47692                                                           | 1875.240468                                                                                              | 1726.939314 | 1407.856158              |                |             |             |     |

|                 |                                                     |                         |                        |        |
|-----------------|-----------------------------------------------------|-------------------------|------------------------|--------|
| 1893.885567     | -0.427674347                                        | 0.00316614              | 0.02614845             | ADNP2  |
| 18              | 80109031                                            | 80147523                | + 5893                 |        |
| protein_coding  | ADNP homeobox 2                                     | [Source:HGNC            | Symbol;Acc:HGNC:23803] |        |
| Others          | 1168 1472                                           | 1542 2070               | 2052 1760              |        |
| 10.83929695     | 11.01299208                                         | 12.12133317             | 16.98380993            |        |
| 15.1739802      | 13.9419096                                          |                         |                        |        |
| ENSG00000149182 | 2052.450013                                         | 2171.846523             | 2042.620891            |        |
| 2637.017833     | 2750.718231                                         | 2719.92942              | 2088.972476            |        |
| 2702.555161     | -0.371455176                                        | 0.003170269             | 0.026168413            |        |
| ARFGAP2 11      | 47164299                                            | 47177125                | - 5918                 |        |
| protein_coding  | ADP ribosylation factor GTPase activating protein 2 |                         |                        |        |
| [Source:HGNC    | Symbol;Acc:HGNC:13504]                              | -                       | 1774 2343 2089         |        |
| 2625            | 3010 2772                                           | 16.39356351             | 17.4554595             |        |
| 16.35181387     | 21.44645736                                         | 22.16410161             | 21.8657461             |        |
| ENSG00000189046 | 443.1163218                                         | 598.810437              | 491.8326033            |        |
| 808.6854687     | 756.6759785                                         | 696.6630188             | 511.2531207            |        |
| 754.0081554     | -0.559343294                                        | 0.003173923             | 0.026184433            | ALKBH2 |
| 12              | 109088188                                           | 109093631               | - 2290                 |        |
| protein_coding  | "alkB homolog 2, alpha-ketoglutarate dependent      |                         |                        |        |
| dioxygenase     | [Source:HGNC                                        | Symbol;Acc:HGNC:32487]" | -                      | 383    |
| 646             | 503 805                                             | 828 710                 | 9.146564565            |        |
| 12.43743986     | 10.17501267                                         | 16.99658281             | 15.75627138            |        |
| 14.47334459     |                                                     |                         |                        |        |
| ENSG00000165487 | 1396.452743                                         | 1154.05417              | 1217.359028            |        |
| 680.0994563     | 941.2756737                                         | 976.3094419             | 1255.955314            |        |
| 865.8948573     | 0.535878139                                         | 0.003184663             | 0.026258866            | MICU2  |
| 13              | 21492691                                            | 21604214                | - 3645                 |        |
| protein_coding  | mitochondrial calcium uptake 2                      | [Source:HGNC            | Symbol;Acc:HGNC:31830] |        |
| 995             | 18.10941621                                         | 15.05933439             | 15.82246977            | 1030   |
| 8.980331169     | 12.31397563                                         | 12.74299709             |                        |        |
| ENSG00000102575 | 118.0100909                                         | 205.7831533             | 212.1822563            |        |
| 55.25180221     | 68.53949081                                         | 116.7646468             | 178.6585002            |        |
| 80.18531328     | 1.157631488                                         | 0.003188607             | 0.026277216            | ACP5   |
| 19              | 11574660                                            | 11579008                | - 2919                 |        |
| protein_coding  | "acid phosphatase 5, tartrate resistant             | [Source:HGNC            | Symbol;Acc:HGNC:124]"  |        |
| 119             | 1.911000451                                         | 3.353148887             | 3.443722076            | 75     |
| 0.911023985     | 1.119658976                                         | 1.903088138             |                        |        |
| ENSG00000234883 | 595.835263                                          | 543.1933685             | 443.9204809            |        |
| 721.2871634     | 836.1817878                                         | 762.4044586             | 527.6497042            |        |
| 773.2911366     | -0.552371505                                        | 0.003191115             | 0.026283719            |        |
| MIR155HG        | 21 25561909                                         | 25575168                | + 1600                 |        |
| lincRNA         | MIR155 host gene                                    | [Source:HGNC            | Symbol;Acc:HGNC:35460] |        |
| -               | 515 586                                             | 454 718                 | 915 777                |        |
| 17.60280829     | 16.14773417                                         | 13.14432613             | 21.69729921            |        |
| 24.92066971     | 22.66976781                                         |                         |                        |        |
| ENSG00000234432 | 5.784808379                                         | 29.66243651             | 25.42275882            |        |
| 62.28384977     | 60.31475191                                         | 95.17790539             | 20.29000124            |        |
| 72.59216902     | -1.826934977                                        | 0.003205787             | 0.026383149            |        |



|                              |                        |              |                     |              |                       |                |             |
|------------------------------|------------------------|--------------|---------------------|--------------|-----------------------|----------------|-------------|
| AC092171.3                   | 7                      | 5426277      | 5428927             | -            | 2651                  | lincRNA        |             |
| uncharacterized LOC100129484 |                        | [Source:NCBI | gene;Acc:100129484] |              | -                     |                |             |
|                              | 5                      | 32           | 26                  | 62           | 66                    | 97             | 0.103146617 |
|                              | 0.532199189            | 0.454324415  | 1.130793174         |              |                       |                | 1.084907735 |
|                              | 1.70807935             |              |                     |              |                       |                |             |
| ENSG00000153823              | 173.5442514            |              | 164.9973031         |              | 208.2710626           |                |             |
| 91.4166182                   | 94.12756737            |              | 104.0088451         |              | 182.2708724           |                |             |
| 96.51767688                  | 0.917391741            |              | 0.003208227         |              | 0.026383149           | PID1           |             |
|                              | 2                      | 228850526    | 229271285           |              | -                     | 3364           |             |
| protein_coding               | phosphotyrosine        | interaction  | domain              | containing   | 1                     |                |             |
| [Source:HGNC                 | Symbol;Acc:HGNC:26084] |              | -                   | 150          | 178                   | 213            |             |
|                              | 91                     | 103          | 106                 | 2.438540566  | 2.332909938           |                |             |
| 2.933094612                  | 1.307936386            |              | 1.334258061         |              | 1.470943237           |                |             |
| ENSG00000213030              | 46.27846703            |              | 54.69011731         |              | 66.4902923            |                |             |
| 7.032047554                  | 12.79403828            |              | 24.53038799         |              | 55.81962555           |                |             |
| 14.78549127                  | 1.917193027            |              | 0.003208365         |              | 0.026383149           | CGB8           |             |
|                              | 19                     | 49047638     | 49049106            |              | -                     | 882            |             |
| protein_coding               | chorionic gonadotropin | subunit      | beta                | 8            | [Source:HGNC          |                |             |
| Symbol;Acc:HGNC:16453]       |                        | -            | 40                  | 59           | 68                    | 7              | 14          |
|                              | 25                     | 2.480196664  | 2.949289363         |              | 3.571435271           |                |             |
| 0.383734345                  | 0.691700434            |              | 1.323175526         |              |                       |                |             |
| ENSG00000165475              | 439.6454368            |              | 421.7627691         |              | 295.2951217           |                |             |
| 619.824763                   | 593.0950604            |              | 571.0674323         |              | 385.5677758           |                |             |
| 594.6624186                  | -0.625817586           |              | 0.003216045         |              | 0.026432082           | CRYL1          |             |
|                              | 13                     | 20403666     | 20525873            |              | -                     | 4327           |             |
| protein_coding               | crystallin             | lambda       | 1                   | [Source:HGNC |                       |                |             |
| Symbol;Acc:HGNC:18246]       |                        | -            | 380                 | 455          | 302                   | 617            | 649         |
|                              | 582                    | 4.802765853  | 4.636160468         |              | 3.233125058           |                |             |
| 6.894447761                  | 6.536065554            |              | 6.278879165         |              |                       |                |             |
| ENSG00000143774              | 3251.062309            |              | 4192.60001          |              | 3569.942017           |                |             |
| 4385.988517                  | 5222.709199            |              | 5112.132856         |              | 3671.201445           |                |             |
| 4906.943524                  | -0.418369694           |              | 0.00322456          |              | 0.026487826           | GUK1           |             |
|                              | 1                      | 228139962    | 228148984           |              | +                     | 4725           |             |
| protein_coding               | guanylate              | kinase       | 1                   | [Source:HGNC | Symbol;Acc:HGNC:4693] |                |             |
|                              | -                      | 2810         | 4523                | 3651         | 4366                  | 5715           | 5210        |
| 32.52364558                  | 42.20449741            |              | 35.7941848          |              | 44.67691069           |                |             |
| 52.70757309                  | 51.47329219            |              |                     |              |                       |                |             |
| ENSG00000196591              | 4480.91257             |              | 3773.618094         |              | 3603.187164           |                |             |
| 2670.168914                  | 3180.232373            |              | 3042.749326         |              | 3952.572609           |                |             |
| 2964.383538                  | 0.414754146            |              | 0.003227023         |              | 0.026493827           | HDAC2          |             |
|                              | 6                      | 113933028    | 114011308           |              | -                     | 15461          |             |
| protein_coding               | histone                | deacetylase  | 2                   | [Source:HGNC |                       |                |             |
| Symbol;Acc:HGNC:4853]        |                        | -            | 3873                | 4071         | 3685                  | 2658           | 3480        |
|                              | 3101                   | 13.69949725  | 11.60907134         |              | 11.04084639           |                |             |
| 8.312250312                  | 9.808447267            |              | 9.362896485         |              |                       |                |             |
| ENSG00000157911              | 414.1922799            |              | 342.9719221         |              | 327.5624694           |                |             |
| 508.3165803                  | 545.5743468            |              | 581.860803          |              | 361.5755571           |                |             |
| 545.2505767                  | -0.593942981           |              | 0.003237973         |              | 0.026569458           | PEX10          |             |
|                              | 1                      | 2403964      | 2413797             | -            | 3789                  | protein_coding |             |
| peroxisomal                  | biogenesis             | factor       | 10                  | [Source:HGNC | Symbol;Acc:HGNC:8851] |                |             |

|                        |                                                 |                |                        |                                |             |                        |       |    |
|------------------------|-------------------------------------------------|----------------|------------------------|--------------------------------|-------------|------------------------|-------|----|
| -                      | 358                                             | 370            | 335                    | 506                            | 597         | 593                    |       |    |
| 5.167174569            | 4.305375913                                     |                | 4.095648315            |                                | 6.456945609 |                        |       |    |
| 6.866071531            | 7.305940381                                     |                |                        |                                |             |                        |       |    |
| ENSG00000184990        | 932.5111106                                     |                | 1295.877695            |                                | 1458.875237 |                        |       |    |
| 814.7129381            | 724.6908828                                     |                | 940.0044677            |                                | 1229.088014 |                        |       |    |
| 826.4694295            | 0.573383669                                     |                | 0.003242446            |                                | 0.026583987 |                        | SIVA1 |    |
| 14                     | 104753100                                       |                | 104768494              |                                | + 4776      |                        |       |    |
| protein_coding         | SIVA1 apoptosis inducing factor                 |                |                        | [Source:HGNC                   |             |                        |       |    |
| Symbol;Acc:HGNC:17712] | -                                               |                | 806                    | 1398                           | 1492        | 811                    | 793   |    |
| 958                    | 9.229229306                                     |                | 12.90555872            |                                | 14.47128047 |                        |       |    |
| 8.21027592             | 7.235481992                                     |                | 9.363694302            |                                |             |                        |       |    |
| ENSG00000065183        | 7494.797735                                     |                | 7660.324228            |                                | 6219.775725 |                        |       |    |
| 9080.382549            | 9219.018443                                     |                | 9330.378375            |                                | 7124.965896 |                        |       |    |
| 9209.926456            | -0.3703407                                      |                | 0.003243222            |                                | 0.026583987 |                        | WDR3  |    |
| 1                      | 117929720                                       |                | 117966542              |                                | + 10275     |                        |       |    |
| protein_coding         | WD repeat domain 3                              |                |                        | [Source:HGNC                   |             | Symbol;Acc:HGNC:12755] |       |    |
| -                      | 6478                                            | 8264           | 6361                   | 9039                           | 10088       | 9509                   |       |    |
| 34.47893366            | 35.46030249                                     |                | 28.67781249            |                                | 42.53434725 |                        |       |    |
| 42.78404484            | 43.20152253                                     |                |                        |                                |             |                        |       |    |
| ENSG00000165383        | 11.56961676                                     |                | 1.853902282            |                                | 19.55596832 |                        | 0     |    |
| 0                      | 0                                               | 10.99316245    | 0                      |                                | 5.950300682 |                        |       |    |
| 0.003247533            | 1                                               | LRRC18         | 10                     | 48909483                       |             | 48914232               |       |    |
| -                      | 1617                                            | protein_coding |                        | leucine rich repeat containing |             |                        |       |    |
| 18                     | [Source:HGNC                                    |                | Symbol;Acc:HGNC:23199] |                                | -           | 10                     | 2     | 20 |
| 0                      | 0                                               | 0              | 0.338208636            |                                | 0.054532315 |                        |       |    |
| 0.57295753             | 0                                               | 0              | 0                      |                                |             |                        |       |    |
| ENSG00000223653        | 23.13923351                                     |                | 8.342560268            |                                | 8.800185745 |                        | 0     |    |
| 0                      | 0.981215519                                     |                | 13.42732651            |                                | 0.32707184  |                        |       |    |
| 5.274276345            | 0.003250365                                     |                | 1                      | AL078459.1                     | 1           |                        |       |    |
| 85276715               | 85448124                                        |                | +                      | 2277                           | antisense   |                        | novel |    |
| transcript             | -                                               | 20             | 9                      | 9                              | 0           | 0                      | 1     |    |
| 0.480354295            | 0.174266311                                     |                | 0.183097298            |                                | 0           |                        | 0     |    |
| 0.020501376            |                                                 |                |                        |                                |             |                        |       |    |
| ENSG00000205581        | 5353.261674                                     |                | 5594.150135            |                                | 6174.796998 |                        |       |    |
| 4454.299836            | 4310.677042                                     |                | 4593.069847            |                                | 5707.402936 |                        |       |    |
| 4452.682242            | 0.358261141                                     |                | 0.003256454            |                                | 0.026675676 |                        | HMG1  |    |
| 21                     | 39342315                                        |                | 39349647               |                                | - 5102      |                        |       |    |
| protein_coding         | high mobility group nucleosome binding domain 1 |                |                        | [Source:HGNC                   |             | Symbol;Acc:HGNC:4984]  |       |    |
| 4434                   | 4717                                            | 4681           | 49.59681158            |                                | 4627        | 6035                   | 6315  |    |
| 57.33705155            | 42.02003898                                     |                | 40.28877102            |                                | 42.82962015 |                        |       |    |
| ENSG00000180089        | 85.615164                                       |                | 101.9646255            |                                | 51.82331606 |                        |       |    |
| 20.09156444            | 22.84649694                                     |                | 38.26740526            |                                | 79.80103518 |                        |       |    |
| 27.06848888            | 1.560214493                                     |                | 0.003257898            |                                | 0.026675676 |                        |       |    |
| TMEM86B                | 19                                              | 55226639       | 55229264               |                                | - 2626      |                        |       |    |
| protein_coding         | transmembrane protein 86B                       |                |                        | [Source:HGNC                   |             | Symbol;Acc:HGNC:28448] |       |    |
| 39                     | 1.541103159                                     |                | 1.846851266            |                                | 0.934939705 |                        | 25    |    |
| 0.368244688            | 0.414862218                                     |                | 0.693291573            |                                |             |                        |       |    |
| ENSG00000100479        | 367.9138129                                     |                | 322.578997             |                                | 425.342311  |                        |       |    |

|                 |                                                                                    |             |             |                |
|-----------------|------------------------------------------------------------------------------------|-------------|-------------|----------------|
| 216.988896      | 257.7084854                                                                        | 213.9049832 | 371.9450403 |                |
| 229.5341215     | 0.695732608                                                                        | 0.003259999 | 0.026678589 | POLE2          |
| 14              | 49643555                                                                           | 49688422    | - 2955      |                |
| protein_coding  | "DNA polymerase epsilon 2, accessory subunit [Source:HGNC Symbol;Acc:HGNC:9178]"   |             |             |                |
| 216             | 282                                                                                | 218         | 5.885242296 | 5.192251455    |
| 6.819212554     | 3.534251756                                                                        | 4.158629412 | 3.44385648  |                |
| ENSG00000102595 | 645.584615                                                                         | 539.485564  | 684.4588913 |                |
| 506.3074239     | 312.5400781                                                                        | 360.1060956 | 623.1763568 |                |
| 392.9845325     | 0.665560743                                                                        | 0.003264083 | 0.026691921 | UGGT2          |
| 13              | 95801580                                                                           | 96053482    | - 8105      |                |
| protein_coding  | UDP-glucose glycoprotein glucosyltransferase 2 [Source:HGNC Symbol;Acc:HGNC:15664] |             |             |                |
| 504             | 342                                                                                | 367         | 3.765094599 | 3.165949065    |
| 4.000805851     | 3.006621327                                                                        | 1.838788101 | 2.113776576 |                |
| ENSG00000080166 | 5.784808379                                                                        | 0.926951141 | 0           | 23.10529911    |
| 35.64053522     | 14.71823279                                                                        | 2.237253173 | 24.48802237 |                |
| -3.509026621    | 0.00326512                                                                         | 0.026691921 | DCT         | 13             |
| 94436808        | 94479682                                                                           | -           | 7543        | protein_coding |
|                 | dopachrome tautomerase [Source:HGNC Symbol;Acc:HGNC:2709]                          |             |             |                |
| -               | 5                                                                                  | 1           | 0           | 23             |
| 0.036251052     | 0.005845072                                                                        | 0           | 0.147429687 | 0.225309289    |
| 0.092831034     |                                                                                    |             |             |                |
| ENSG00000179869 | 160.8176729                                                                        | 167.7781565 | 117.3358099 |                |
| 241.0987733     | 211.1016317                                                                        | 390.5237767 | 148.6438798 |                |
| 280.9080606     | -0.918257704                                                                       | 0.003282393 | 0.026810613 | ABCA13         |
| 7               | 48171458                                                                           | 48647496    | + 19074     |                |
| protein_coding  | ATP binding cassette subfamily A member 13 [Source:HGNC Symbol;Acc:HGNC:14638]     |             |             |                |
| 240             | 231                                                                                | 398         | 0.398536163 | 0.418379845    |
| 0.291435145     | 0.608374048                                                                        | 0.527750677 | 0.974063634 |                |
| ENSG00000143420 | 2289.627156                                                                        | 2805.881103 | 3064.420236 |                |
| 1785.135501     | 2249.923018                                                                        | 1880.008935 | 2719.976165 |                |
| 1971.689151     | 0.464298183                                                                        | 0.003283147 | 0.026810613 | ENSA           |
| 1               | 150600851                                                                          | 150629612   | - 5493      |                |
| protein_coding  | endosulfine alpha [Source:HGNC Symbol;Acc:HGNC:3360]                               |             |             |                |
| -               | 1979                                                                               | 3027        | 3134        | 1777           |
| 19.70293424     | 24.29611194                                                                        | 26.42967659 | 15.64152328 |                |
| 19.53156518     | 16.28290697                                                                        |             |             |                |
| ENSG00000167566 | 450.0580919                                                                        | 807.3744437 | 782.2387329 |                |
| 1019.646895     | 1036.317101                                                                        | 1104.848675 | 679.8904228 |                |
| 1053.604224     | -0.630477823                                                                       | 0.003285845 | 0.026816368 |                |
| NCKAP5L 12      | 49791146                                                                           | 49828750    | - 8090      |                |
| protein_coding  | NCK associated protein 5 like [Source:HGNC Symbol;Acc:HGNC:29321]                  |             |             |                |
| 1126            | 2.629636943                                                                        | 4.746829048 | 4.580827324 | 1134           |
| 6.066228109     | 6.108338989                                                                        | 6.497344655 |             |                |
| ENSG00000169871 | 1117.624979                                                                        | 1175.374047 | 1318.072265 |                |
| 1793.172126     | 1409.171931                                                                        | 1799.549263 | 1203.69043  |                |
| 1667.297773     | -0.469605688                                                                       | 0.003288084 | 0.026816368 | TRIM56         |

|                                     |                                               |             |      |             |             |
|-------------------------------------|-----------------------------------------------|-------------|------|-------------|-------------|
| 7                                   | 101085439                                     | 101097967   | +    | 11173       |             |
| protein_coding                      | tripartite motif containing 56 [Source:HGNC   |             |      |             |             |
| Symbol;Acc:HGNC:19028]              | -                                             | 966         | 1268 | 1348        | 1785        |
| 1834                                | 4.728267519                                   | 5.00360955  |      | 5.58885123  | 1542        |
| 7.72448685                          | 6.014135002                                   | 7.662589645 |      |             |             |
| ENSG00000135362                     | 180.4860214                                   | 160.3625474 |      | 229.7826278 |             |
| 114.5219173                         | 66.71177105                                   | 104.0088451 |      | 190.2103989 |             |
| 95.08084448                         | 1.001868251                                   | 0.003289114 |      | 0.026816368 | PRR5L       |
| 11                                  | 36296288                                      | 36465204    | +    | 6616        |             |
| protein_coding                      | proline rich 5 like [Source:HGNC              |             |      |             |             |
| Symbol;Acc:HGNC:25878]              | -                                             | 156         | 173  | 235         | 114         |
| 106                                 | 1.289507328                                   | 1.152881219 |      | 1.645412611 | 73          |
| 0.833125776                         | 0.480823805                                   | 0.747922166 |      |             |             |
| ENSG00000198642                     | 1718.088088                                   | 1760.280216 |      | 1409.985316 |             |
| 2271.35136                          | 2782.703327                                   | 1876.084073 |      | 1629.451207 |             |
| 2310.046253                         | -0.503753749                                  | 0.003298158 |      | 0.026875768 | KLHL9       |
| 9                                   | 21329671                                      | 21335380    | -    | 5710        |             |
| protein_coding                      | kelch like family member 9 [Source:HGNC       |             |      |             |             |
| Symbol;Acc:HGNC:18732]              | -                                             | 1485        | 1899 | 1442        | 2261        |
| 1912                                | 14.22279853                                   | 14.66299932 |      | 11.69853848 | 3045        |
| 19.14545406                         | 23.23859068                                   | 15.6313978  |      |             |             |
| ENSG0000009954                      | 3971.849433                                   | 3626.232863 |      | 4200.621996 |             |
| 3199.581637                         | 2906.07441                                    | 2995.650981 |      | 3932.901431 |             |
| 3033.769009                         | 0.374478056                                   | 0.00330883  |      | 0.026948364 | BAZ1B       |
| 7                                   | 73440398                                      | 73522278    | -    | 7053        |             |
| protein_coding                      | bromodomain adjacent to zinc finger domain 1B |             |      |             |             |
| [Source:HGNC Symbol;Acc:HGNC:961]   | -                                             |             |      | 3433        | 3912        |
| 3185                                | 3180                                          | 3053        |      | 26.61917751 | 24.45450747 |
| 28.21583095                         | 21.83417412                                   | 19.64770523 |      | 20.20686576 |             |
| ENSG00000214078                     | 3406.095173                                   | 3553.003723 |      | 3829.058598 |             |
| 2428.065563                         | 2566.118536                                   | 3104.565904 |      | 3596.052498 |             |
| 2699.583334                         | 0.413772259                                   | 0.003317907 |      | 0.0270079   | CPNE1       |
| 20                                  | 35626031                                      | 35664956    | -    | 3608        |             |
| protein_coding                      | copine 1 [Source:HGNC Symbol;Acc:HGNC:2314]   |             |      |             | -           |
| 2944                                | 3833                                          | 3916        | 2417 | 2808        | 3164        |
| 46.83885267                         | 50.27807136                                   | 32.39002909 |      | 33.91479313 |             |
| 40.93699706                         |                                               |             |      |             |             |
| ENSG00000234797                     | 527.5745241                                   | 554.3167822 |      | 509.4329748 |             |
| 687.1315039                         | 753.020539                                    | 843.8453467 |      | 530.4414271 |             |
| 761.3324632                         | -0.521247686                                  | 0.003326429 |      | 0.027060544 |             |
| RPS3AP6 15                          | 59768352                                      | 59769146    | +    | 795         |             |
| processed_pseudogene                | ribosomal protein S3A pseudogene 6            |             |      |             |             |
| [Source:HGNC Symbol;Acc:HGNC:18630] | -                                             |             |      | 456         | 598         |
| 684                                 | 824                                           | 860         |      | 31.36840429 | 33.16408452 |
| 30.35799258                         | 41.59969913                                   | 45.16673326 |      | 50.49836981 |             |
| ENSG00000188612                     | 3444.274909                                   | 3493.67885  |      | 4122.398123 |             |
| 2913.276844                         | 2731.527174                                   | 2813.144894 |      | 3686.78396  |             |
| 2819.316304                         | 0.387151316                                   | 0.003327914 |      | 0.027060544 | SUM02       |
| 17                                  | 75165586                                      | 75182983    | -    | 3372        |             |
| protein_coding                      | small ubiquitin-like modifier 2 [Source:HGNC  |             |      |             |             |

|                                       |                                                       |             |             |             |             |             |
|---------------------------------------|-------------------------------------------------------|-------------|-------------|-------------|-------------|-------------|
| Symbol;Acc:HGNC:11125]                | -                                                     | 2977        | 3769        | 4216        | 2900        | 2989        |
| 2867                                  | 48.28208113                                           | 49.28020769 |             | 57.91825812 |             |             |
| 41.58260075                           | 38.62753074                                           | 39.69046279 |             |             |             |             |
| ENSG00000067445                       | 112.2252825                                           | 175.1937656 |             | 74.31267963 |             |             |
| 163.7462502                           | 292.4351608                                           | 304.176811  |             | 120.5772426 |             |             |
| 253.4527407                           | -1.070693356                                          | 0.003335915 |             | 0.027111183 |             | TRO         |
| X                                     | 54920462                                              | 54931431    |             | + 6716      |             |             |
| protein_coding                        | trophinin [Source:HGNC Symbol;Acc:HGNC:12326]         |             |             |             |             | -           |
| 97                                    | 189                                                   | 76          | 163         | 320         | 310         | 0.789870255 |
| 1.240752259                           | 0.524210071                                           |             | 1.173486596 |             | 2.076337218 |             |
| 2.154750758                           |                                                       |             |             |             |             |             |
| ENSG00000152207                       | 124.951861                                            | 178.9015702 |             | 74.31267963 |             |             |
| 199.9110662                           | 355.4914923                                           | 228.623216  |             | 126.0553703 |             |             |
| 261.3419248                           | -1.051557585                                          | 0.003340201 |             | 0.027131593 |             |             |
| CYSLTR2                               | 13                                                    | 48653711    | 48711226    | + 5372      |             |             |
| protein_coding                        | cysteinyl leukotriene receptor 2 [Source:HGNC         |             |             |             |             |             |
| Symbol;Acc:HGNC:18274]                | -                                                     | 108         | 193         | 76          | 199         | 389         |
| 233                                   | 1.099467672                                           | 1.584000313 |             | 0.655360171 |             |             |
| 1.791093628                           | 3.15552914                                            | 2.024724569 |             |             |             |             |
| ENSG00000055130                       | 1670.65266                                            | 1431.212561 |             | 1503.853964 |             |             |
| 1155.264955                           | 1117.65063                                            | 1156.853097 |             | 1535.239728 |             |             |
| 1143.256228                           | 0.424963286                                           | 0.003350086 |             | 0.027197434 |             | CUL1        |
| 7                                     | 148697914                                             | 148801036   |             | + 3548      |             |             |
| protein_coding                        | cullin 1 [Source:HGNC Symbol;Acc:HGNC:2551]           |             |             |             |             | -           |
| 1444                                  | 1544                                                  | 1538        | 1150        | 1223        | 1179        | 22.25759803 |
| 19.18658327                           | 20.08053041                                           |             | 15.67167605 |             | 15.02108984 |             |
| 15.51230124                           |                                                       |             |             |             |             |             |
| ENSG00000144642                       | 518.3188307                                           | 374.4882609 |             | 432.1868999 |             |             |
| 289.3185279                           | 291.5213009                                           | 260.0221127 |             | 441.6646639 |             |             |
| 280.2873138                           | 0.65475881                                            | 0.003358746 |             | 0.02724733  |             | RBMS3       |
| 3                                     | 28574791                                              | 30010391    |             | + 18339     |             |             |
| protein_coding                        | RNA binding motif single stranded interacting protein |             |             |             |             |             |
| 3 [Source:HGNC Symbol;Acc:HGNC:13427] | -                                                     |             |             | 448         | 404         | 442         |
| 288                                   | 319                                                   | 265         | 1.335971139 | 0.971269324 |             |             |
| 1.116475185                           | 0.759308137                                           | 0.758007723 |             | 0.674553281 |             |             |
| ENSG00000135124                       | 416.5062033                                           | 338.3371664 |             | 244.449604  |             |             |
| 601.742355                            | 524.5555696                                           | 485.7016821 |             | 333.0976579 |             |             |
| 537.3332023                           | -0.691327078                                          | 0.003359797 |             | 0.02724733  |             | P2RX4       |
| 12                                    | 121209857                                             | 121234106   |             | + 8159      |             |             |
| protein_coding                        | purinergic receptor P2X 4 [Source:HGNC                |             |             |             |             |             |
| Symbol;Acc:HGNC:8535]                 | -                                                     | 360         | 365         | 250         | 599         | 574         |
| 495                                   | 2.413016438                                           | 1.972376817 |             | 1.419402387 |             |             |
| 3.549695547                           | 3.065727553                                           | 2.832137286 |             |             |             |             |
| ENSG00000095319                       | 2916.700384                                           | 3066.354374 |             | 3176.867054 |             |             |
| 2569.711092                           | 2060.754024                                           | 2301.931609 |             | 3053.307271 |             |             |
| 2310.798908                           | 0.402228218                                           | 0.003370298 |             | 0.027317997 |             | NUP188      |
| 9                                     | 128947699                                             | 129007096   |             | + 8041      |             |             |
| protein_coding                        | nucleoporin 188 [Source:HGNC Symbol;Acc:HGNC:17859]   |             |             |             |             |             |
| -                                     | 2521                                                  | 3308        | 3249        | 2558        | 2255        | 2346        |
| 17.14578985                           | 18.13799997                                           | 18.71725275 |             | 15.38125225 |             |             |

|                                                                  |                                                       |             |                |        |  |  |
|------------------------------------------------------------------|-------------------------------------------------------|-------------|----------------|--------|--|--|
| 12.22067183                                                      | 13.61958836                                           |             |                |        |  |  |
| ENSG00000184378                                                  | 41.65062033                                           | 56.54401959 | 39.11193665    |        |  |  |
| 80.36625776                                                      | 125.1988032                                           | 121.6707244 | 45.76885885    |        |  |  |
| 109.0785951                                                      | -1.251366539                                          | 0.00339792  | 0.027527297    | ACTRT3 |  |  |
| 3                                                                | 169766921                                             | 169769895   | - 2005         |        |  |  |
| protein_coding                                                   | actin related protein T3 [Source:HGNC                 |             |                |        |  |  |
| Symbol;Acc:HGNC:24022]                                           | -                                                     | 36 61       | 40 80          | 137    |  |  |
| 124                                                              | 0.981935218                                           | 1.341372554 | 0.924161921    |        |  |  |
| 1.929198104                                                      | 2.977589251                                           | 2.887043609 |                |        |  |  |
| ENSG00000171680                                                  | 232.5492968                                           | 431.0322805 | 419.4755205    |        |  |  |
| 731.3329456                                                      | 549.2297863                                           | 536.7248891 | 361.0190326    |        |  |  |
| 605.7625404                                                      | -0.744418355                                          | 0.003400528 | 0.027533829    |        |  |  |
| PLEKHG5 1                                                        | 6466092 6520061                                       | - 7053      | protein_coding |        |  |  |
| pleckstrin homology and RhoGEF domain containing G5 [Source:HGNC |                                                       |             |                |        |  |  |
| Symbol;Acc:HGNC:29105]                                           | -                                                     | 201 465     | 429 728        | 601    |  |  |
| 547                                                              | 1.558536172                                           | 2.90678578  | 2.817642336    |        |  |  |
| 4.99066837                                                       | 3.713292718                                           | 3.62042436  |                |        |  |  |
| ENSG00000107566                                                  | 1802.546291                                           | 1695.393637 | 1934.085267    |        |  |  |
| 1238.644948                                                      | 1406.430351                                           | 1413.931564 | 1810.675065    |        |  |  |
| 1353.002288                                                      | 0.420208707                                           | 0.003404885 | 0.027547153    | ERLIN1 |  |  |
| 10                                                               | 100150094                                             | 100188334   | - 5792         |        |  |  |
| protein_coding                                                   | ER lipid raft associated 1 [Source:HGNC               |             |                |        |  |  |
| Symbol;Acc:HGNC:16947]                                           | -                                                     | 1558 1829   | 1978 1233      | 1539   |  |  |
| 1441                                                             | 14.71070928                                           | 13.92256039 | 15.8197709     |        |  |  |
| 10.29285228                                                      | 11.57893629                                           | 11.61399042 |                |        |  |  |
| ENSG00000122779                                                  | 776.3212844                                           | 621.9842155 | 836.0176458    |        |  |  |
| 483.2021248                                                      | 551.0575061                                           | 482.7580356 | 744.7743819    |        |  |  |
| 505.6725555                                                      | 0.557945487                                           | 0.003407232 | 0.027547153    | TRIM24 |  |  |
| 7                                                                | 138460334                                             | 138589993   | + 9223         |        |  |  |
| protein_coding                                                   | tripartite motif containing 24 [Source:HGNC           |             |                |        |  |  |
| Symbol;Acc:HGNC:11812]                                           | -                                                     | 671 671     | 855 481        | 603    |  |  |
| 492                                                              | 3.978735091                                           | 3.207630021 | 4.294339363    |        |  |  |
| 2.52158774                                                       | 2.849073815                                           | 2.490226956 |                |        |  |  |
| ENSG00000148843                                                  | 3060.163632                                           | 3457.527755 | 3310.825437    |        |  |  |
| 4771.746555                                                      | 3672.802847                                           | 4676.473166 | 3276.172275    |        |  |  |
| 4373.674189                                                      | -0.416590312                                          | 0.003407579 | 0.027547153    | PDCD11 |  |  |
| 10                                                               | 103396626                                             | 103446292   | + 7670         |        |  |  |
| protein_coding                                                   | programmed cell death 11 [Source:HGNC                 |             |                |        |  |  |
| Symbol;Acc:HGNC:13408]                                           | -                                                     | 2645 3730   | 3386 4750      | 4019   |  |  |
| 4766                                                             | 18.85927638                                           | 21.44111795 | 20.45003453    |        |  |  |
| 29.94328626                                                      | 22.83396021                                           | 29.00712657 |                |        |  |  |
| ENSG00000119523                                                  | 620.1314582                                           | 654.4275054 | 589.6124449    |        |  |  |
| 888.0471483                                                      | 957.7251515                                           | 788.8972777 | 621.3904695    |        |  |  |
| 878.2231925                                                      | -0.499129782                                          | 0.003412812 | 0.027574871    | ALG2   |  |  |
| 9                                                                | 99216426                                              | 99221956    | - 2983         |        |  |  |
| protein_coding                                                   | "ALG2, alpha-1,3/1,6-mannosyltransferase [Source:HGNC |             |                |        |  |  |
| Symbol;Acc:HGNC:23159]"                                          | -                                                     | 536 706     | 603 884        | 1048   |  |  |
| 804                                                              | 9.826667223                                           | 10.43483066 | 9.36411017     |        |  |  |
| 14.32848351                                                      | 15.30969811                                           | 12.58197539 |                |        |  |  |
| ENSG00000107731                                                  | 1059.776895                                           | 1066.920763 | 2301.737472    |        |  |  |

|                                                                        |                                                      |             |                |       |
|------------------------------------------------------------------------|------------------------------------------------------|-------------|----------------|-------|
| 795.6259518                                                            | 496.2259134                                          | 560.2740616 | 1476.145043    |       |
| 617.375309                                                             | 1.257819535                                          | 0.003417959 | 0.027601872    | UNC5B |
| 10                                                                     | 71212570                                             | 71302864    | + 6841         |       |
| protein_coding                                                         | unc-5 netrin receptor B [Source:HGNC                 |             |                |       |
| Symbol;Acc:HGNC:12568]                                                 | -                                                    | 916 1151    | 2354 792       | 543   |
| 571                                                                    | 7.322689106                                          | 7.418048888 | 15.94003695    |       |
| 5.597663759                                                            | 3.458906615                                          | 3.896391199 |                |       |
| ENSG00000173327                                                        | 1721.558973                                          | 2258.97993  | 2685.034451    |       |
| 2818.846491                                                            | 3070.569188                                          | 3571.624491 | 2221.857785    |       |
| 3153.680057                                                            | -0.504861656                                         | 0.003424952 | 0.027643738    |       |
| MAP3K11 11                                                             | 65597755                                             | 65615382    | - 10564        |       |
| protein_coding                                                         | mitogen-activated protein kinase kinase kinase 11    |             |                |       |
| [Source:HGNC Symbol;Acc:HGNC:6850]                                     | -                                                    |             | 1488 2437      | 2746  |
| 2806                                                                   | 3360 3640                                            | 7.703165904 | 10.17094005    |       |
| 12.04133381                                                            | 12.84282281                                          | 13.86019954 | 16.08492451    |       |
| ENSG00000180044                                                        | 86.77212568                                          | 123.2845017 | 170.1369244    |       |
| 57.26095866                                                            | 46.60685375                                          | 61.81657773 | 126.7311839    |       |
| 55.22813004                                                            | 1.200863017                                          | 0.003428918 | 0.027661141    |       |
| C3orf80 3                                                              | 160225496                                            | 160228213   | + 2718         |       |
| protein_coding                                                         | chromosome 3 open reading frame 80 [Source:HGNC      |             |                |       |
| Symbol;Acc:HGNC:40048]                                                 | -                                                    | 75 133      | 174 57         | 51    |
| 63                                                                     | 1.509060056                                          | 2.157427184 | 2.965529521    |       |
| 1.013973535                                                            | 0.817672368                                          | 1.082024596 |                |       |
| ENSG00000150551                                                        | 41.65062033                                          | 100.1107232 | 49.86771922    |       |
| 25.11445555                                                            | 18.27719755                                          | 11.77458623 | 63.87635425    |       |
| 18.38874644                                                            | 1.799942189                                          | 0.003434522 | 0.02769174     | LYPD1 |
| 2                                                                      | 132644853                                            | 132671579   | - 2412         |       |
| protein_coding                                                         | LY6/PLAUR domain containing 1 [Source:HGNC           |             |                |       |
| Symbol;Acc:HGNC:28431]                                                 | -                                                    | 36 108      | 51 25          | 20    |
| 12                                                                     | 0.816243827                                          | 1.97415119  | 0.979479449    |       |
| 0.5011456                                                              | 0.361336048                                          | 0.232246928 |                |       |
| ENSG00000134308                                                        | 10753.95878                                          | 9026.65021  | 9411.309756    |       |
| 7234.972355                                                            | 8036.483762                                          | 7432.70756  | 9730.63958     |       |
| 7568.054559                                                            | 0.362481589                                          | 0.003442885 | 0.027744538    | YWHAQ |
| 2                                                                      | 9583972 9631014                                      | - 2713      | protein_coding |       |
| tyrosine 3-monooxygenase/tryptophan 5-monooxygenase activation protein |                                                      |             |                |       |
| theta [Source:HGNC Symbol;Acc:HGNC:12854]                              |                                                      |             | - 9295 9738    |       |
| 9625 7202 8794 7575                                                    |                                                      | 187.367522  | 158.2537225    |       |
| 164.3438286 128.3525614                                                |                                                      | 141.2522145 | 130.3403489    |       |
| ENSG00000115825                                                        | 2223.680341                                          | 1857.610086 | 1970.263809    |       |
| 1518.922272                                                            | 1630.326021                                          | 1304.035425 | 2017.184745    |       |
| 1484.427906                                                            | 0.44199233                                           | 0.0034666   | 0.027920925    | PRKD3 |
| 2                                                                      | 37250502                                             | 37324808    | - 10244        |       |
| protein_coding                                                         | protein kinase D3 [Source:HGNC Symbol;Acc:HGNC:9408] |             |                |       |
| -                                                                      | 1922 2004                                            | 2015 1512   | 1784 1329      |       |
| 10.2607363                                                             | 8.625059612                                          | 9.111878843 | 7.136469891    |       |
| 7.588988208                                                            | 6.056217265                                          |             |                |       |
| ENSG00000147383                                                        | 1036.637661                                          | 1253.237942 | 1077.533855    |       |
| 1528.968054                                                            | 1472.228263                                          | 1556.207814 | 1122.469819    |       |
| 1519.13471                                                             | -0.436009945                                         | 0.003469084 | 0.027926218    | NSDHL |

|                                     |                                                  |                |             |                          |             |
|-------------------------------------|--------------------------------------------------|----------------|-------------|--------------------------|-------------|
| X                                   | 152830967                                        | 152869729      | +           | 1996                     |             |
| protein_coding                      | NAD(P) dependent steroid dehydrogenase-like      |                |             |                          |             |
| [Source:HGNC Symbol;Acc:HGNC:13398] |                                                  | -              | 896         | 1352                     | 1102        |
| 1522                                | 1611                                             | 1586           | 24.54947367 | 29.86414686              |             |
| 25.57546352                         | 36.8684884                                       | 35.17171952    | 37.09272006 |                          |             |
| ENSG00000105738                     | 1898.57411                                       | 2584.339781    | 2629.299941 |                          |             |
| 3437.666676                         | 2864.036856                                      | 3552.981396    | 2370.737944 |                          |             |
| 3284.894976                         | -0.469999046                                     | 0.003478922    | 0.02797742  |                          |             |
| SIPA1L3                             | 19                                               | 37907228       | 38208372    | +                        | 10335       |
| protein_coding                      | signal induced proliferation associated 1 like 3 |                |             |                          |             |
| [Source:HGNC Symbol;Acc:HGNC:23801] |                                                  | -              | 1641        | 2788                     | 2689        |
| 3422                                | 3134                                             | 3621           | 8.683460095 | 11.89367991              |             |
| 12.05265644                         | 16.00924094                                      | 13.21438966    | 16.35550958 |                          |             |
| ENSG00000165678                     | 4070.191175                                      | 3563.200185    | 3777.235282 |                          |             |
| 3099.123815                         | 2920.696168                                      | 2805.29517     | 3803.542214 |                          |             |
| 2941.705051                         | 0.370542887                                      | 0.003479105    | 0.02797742  |                          | GHITM       |
| 10                                  | 84139440                                         | 84153245       | +           | 2128                     |             |
| protein_coding                      | growth hormone inducible transmembrane protein   |                |             |                          |             |
| [Source:HGNC Symbol;Acc:HGNC:17281] |                                                  | -              | 3518        | 3844                     | 3863        |
| 3085                                | 3196                                             | 2859           | 90.41051107 | 79.64265205              |             |
| 84.09216627                         | 70.0946322                                       | 65.44760292    | 62.71747532 |                          |             |
| ENSG00000182749                     | 177.0151364                                      | 211.3448601    | 194.5818848 |                          |             |
| 277.2635893                         | 383.8211485                                      | 310.0641042    | 194.3139604 |                          |             |
| 323.7162806                         | -0.735797834                                     | 0.003490913    | 0.028057618 |                          | PAQR7       |
| 1                                   | 25861210                                         | 25871253       | -           | 3297                     |             |
| protein_coding                      | progesterin and adipoQ receptor family member 7  |                |             |                          |             |
| [Source:HGNC Symbol;Acc:HGNC:23146] |                                                  | -              | 153         | 228                      | 199         |
| 276                                 | 420                                              | 316            | 2.537857287 | 3.048946879              |             |
| 2.795996253                         | 4.047541883                                      | 5.551226414    | 4.474187409 |                          |             |
| ENSG00000178662                     | 3.470885027                                      | 10.19646255    | 17.60037149 |                          | 0           |
| 0                                   | 0                                                | 10.42257302    | 0           | 5.877302771              |             |
| 0.003493741                         | 1                                                | CSRNP3         | 2           | 165469647                | 165689407   |
| +                                   | 12565                                            | protein_coding |             | cysteine and serine rich |             |
| nuclear protein                     | 3 [Source:HGNC Symbol;Acc:HGNC:30729]            |                |             |                          | 3           |
| 11                                  | 18                                               | 0              | 0           | 0                        | 0.013057303 |
| 0.038597942                         | 0.066360931                                      | 0              | 0           | 0                        |             |
| ENSG00000112541                     | 290.3973806                                      | 277.1583911    | 296.2729201 |                          |             |
| 134.6134818                         | 190.9967144                                      | 182.5060866    | 287.9428973 |                          |             |
| 169.3720943                         | 0.764714253                                      | 0.00349408     | 0.028068311 |                          | PDE10A      |
| 6                                   | 165327287                                        | 165988078      | -           | 22022                    |             |
| protein_coding                      | phosphodiesterase 10A [Source:HGNC               |                |             |                          |             |
| Symbol;Acc:HGNC:8772]               |                                                  | -              | 251         | 299                      | 303         |
| 186                                 | 0.623320881                                      | 0.598616093    | 0.637365169 |                          | 209         |
| 0.294204463                         | 0.413569141                                      | 0.394277707    |             |                          |             |
| ENSG00000151623                     | 134.2075544                                      | 148.3121825    | 93.86864795 |                          |             |
| 237.0804604                         | 215.6709311                                      | 233.5292936    | 125.462795  |                          |             |
| 228.7602284                         | -0.866587624                                     | 0.003496655    | 0.028074248 |                          | NR3C2       |
| 4                                   | 148078762                                        | 148444698      | -           | 6607                     |             |
| protein_coding                      | nuclear receptor subfamily 3 group C member 2    |                |             |                          |             |
| [Source:HGNC Symbol;Acc:HGNC:7979]  |                                                  | ESR-like       |             | 116                      | 160         |



|                                  |                                                        |             |             |             |                |        |     |
|----------------------------------|--------------------------------------------------------|-------------|-------------|-------------|----------------|--------|-----|
| 96                               | 236                                                    | 236         | 238         | 0.960170581 | 1.067700961    |        |     |
| 0.673084178                      |                                                        | 1.727065913 |             | 1.556561534 | 1.681584463    |        |     |
| ENSG00000128016                  | 192.0556382                                            |             | 225.2491272 | 192.626288  |                |        |     |
| 271.2361199                      | 364.6300911                                            |             | 376.7867595 | 203.3103511 |                |        |     |
| 337.5509902                      | -0.730958447                                           |             | 0.003505887 | 0.0281245   |                | ZFP36  |     |
| 19                               | 39406813                                               |             | 39409412    | +           | 2010           |        |     |
| protein_coding                   | ZFP36 ring finger protein [Source:HGNC                 |             |             |             |                |        |     |
| Symbol;Acc:HGNC:12862]           | -                                                      |             | 166         | 243         | 197            | 270    |     |
| 384                              | 4.516549178                                            |             | 5.330208213 | 4.54017533  |                | 399    |     |
| 6.494846977                      | 8.650384982                                            |             | 8.91828204  |             |                |        |     |
| ENSG00000260686                  | 101.8126275                                            |             | 60.25182416 | 46.93432398 |                |        |     |
| 210.9614266                      | 119.7156439                                            |             | 143.2574658 | 69.66625853 |                |        |     |
| 157.9781788                      | -1.185552272                                           |             | 0.003506594 | 0.0281245   |                |        |     |
| AC008669.1                       | 5                                                      | 122832356   | 122834533   | +           |                | 2178   |     |
| sense_overlapping                | "novel transcript, overlapping SNX2"                   |             |             |             |                |        |     |
| -                                | 88                                                     | 65          | 48          | 210         | 131            | 146    |     |
| 2.209629755                      | 1.315798658                                            |             | 1.020906145 | 4.66189659  |                |        |     |
| 2.621030158                      | 3.129255442                                            |             |             |             |                |        |     |
| ENSG00000153406                  | 741.6124341                                            |             | 903.7773623 | 861.4404046 |                |        |     |
| 1081.930745                      | 1169.740643                                            |             | 1218.669675 | 835.610067  |                |        |     |
| 1156.780354                      | -0.468522452                                           |             | 0.003519437 | 0.02821271  |                | NMRAL1 |     |
| 16                               | 4461680                                                | 4495763     | -           | 3541        | protein_coding | NmrA   |     |
| like redox sensor 1 [Source:HGNC | Symbol;Acc:HGNC:24987]                                 |             |             |             |                | -      | 641 |
| 975                              | 881                                                    | 1077        | 1280        | 1242        | 9.899808995    |        |     |
| 12.13983117                      | 11.52530527                                            |             | 14.70587916 | 15.75225163 |                |        |     |
| 16.37350682                      |                                                        |             |             |             |                |        |     |
| ENSG00000184076                  | 366.7568512                                            |             | 390.2464303 | 447.8316746 |                |        |     |
| 259.1811813                      | 190.9967144                                            |             | 288.4773627 | 401.611652  |                |        |     |
| 246.2184195                      | 0.707009721                                            |             | 0.00352433  | 0.028234083 |                | UQCR10 |     |
| 22                               | 29767369                                               |             | 29770413    | +           | 975            |        |     |
| protein_coding                   | "ubiquinol-cytochrome c reductase, complex III subunit |             |             |             |                |        |     |
| X [Source:HGNC                   | Symbol;Acc:HGNC:30863]"                                |             |             |             |                | -      | 317 |
| 258                              | 209                                                    | 294         | 17.78072067 | 19.03756671 |                | 421    |     |
| 21.76022182                      | 12.79429343                                            |             | 9.341148325 | 14.07630766 |                | 458    |     |
| ENSG00000092098                  | 397.9948164                                            |             | 407.858502  | 489.8770065 |                |        |     |
| 646.948375                       | 590.3534808                                            |             | 668.2077688 | 431.9101083 |                |        |     |
| 635.1698749                      | -0.555794218                                           |             | 0.003525797 | 0.028234083 |                | RNF31  |     |
| 14                               | 24146683                                               |             | 24160661    | +           | 4982           |        |     |
| protein_coding                   | ring finger protein 31 [Source:HGNC                    |             |             |             |                |        |     |
| Symbol;Acc:HGNC:16031]           | -                                                      |             | 344         | 440         | 501            | 644    |     |
| 681                              | 3.776151693                                            |             | 3.893883118 | 4.658396582 |                | 646    |     |
| 6.250048114                      | 5.650506678                                            |             | 6.38100999  |             |                |        |     |
| ENSG00000189369                  | 456.9998619                                            |             | 532.0699548 | 412.6309316 |                |        |     |
| 611.7881372                      | 824.3016094                                            |             | 667.2265532 | 467.2335828 |                |        |     |
| 701.1054333                      | -0.585457368                                           |             | 0.003529575 | 0.028249538 |                | GSPT2  |     |
| X                                | 51743431                                               |             | 51746232    | +           | 2802           |        |     |
| protein_coding                   | G1 to S phase transition 2 [Source:HGNC                |             |             |             |                |        |     |
| Symbol;Acc:HGNC:4622]            | -                                                      |             | 395         | 574         | 422            | 609    |     |
| 680                              | 7.709454993                                            |             | 9.031870862 | 6.976647425 |                | 902    |     |
| 10.50873349                      | 14.02804028                                            |             | 11.32887585 |             |                |        |     |

|                        |                                          |              |              |             |             |
|------------------------|------------------------------------------|--------------|--------------|-------------|-------------|
| ENSG00000184492        | 10.41265508                              | 19.46597396  | 9.777984162  |             |             |
| 36.16481599            | 43.86527412                              | 73.59116396  | 13.21887107  |             |             |
| 51.20708469            | -1.947254223                             | 0.003535257  | 0.028280208  |             |             |
| FOXD4L1 2              | 113498665                                | 113501155    | +            | 2491        |             |
| protein_coding         | forkhead box D4                          | like 1       | [Source:HGNC |             |             |
| Symbol;Acc:HGNC:18521] | Fork                                     | 9            | 21           | 10          | 36          |
| 75                     | 0.197589333                              | 0.371688843  | 0.185963935  |             | 48          |
| 0.698763143            | 0.839703779                              | 1.405508808  |              |             |             |
| ENSG00000254701        | 2.313923351                              | 9.269511408  | 20.53376674  |             | 0           |
| 0                      | 0                                        | 10.70573383  | 0            | 5.916177706 |             |
| 0.003535808            | 1                                        | AC138866.2   | 5            | 70197255    |             |
| 70207745               | -                                        | 584          |              |             |             |
| unprocessed_pseudogene | "glucuronidase, beta (GUSB) pseudogene"  | -            |              |             |             |
| 2                      | 10                                       | 21           | 0            | 0           | 0.187288823 |
| 0.754955078            | 1.665746477                              | 0            | 0            | 0           |             |
| ENSG00000168938        | 292.711304                               | 204.8562021  | 220.9824421  |             |             |
| 76.34794487            | 162.6670582                              | 125.5955865  | 239.5166494  |             |             |
| 121.5368632            | 0.976025189                              | 0.003541404  | 0.028308976  |             | PPIC        |
| 5                      | 123023250                                | 123036741    | -            | 2098        |             |
| protein_coding         | peptidylprolyl isomerase C               | [Source:HGNC |              |             |             |
| Symbol;Acc:HGNC:9256]  | -                                        | 253          | 221          | 226         | 76          |
| 128                    | 6.594923316                              | 4.644305159  | 4.990055904  |             | 178         |
| 1.751496706            | 3.697201463                              | 2.848069098  |              |             |             |
| ENSG00000072501        | 5352.104712                              | 5658.109764  | 7707.984915  |             |             |
| 5271.021931            | 3187.543252                              | 4388.977019  | 6239.399797  |             |             |
| 4282.514067            | 0.543114497                              | 0.003542557  | 0.028308976  |             | SMC1A       |
| X                      | 53374149                                 | 53422728     | -            | 10484       |             |
| protein_coding         | structural maintenance of chromosomes 1A | [Source:HGNC |              |             |             |
| Symbol;Acc:HGNC:11111] | -                                        | 4626         | 6104         | 7883        | 5247        |
| 4473                   | 24.13088939                              | 25.66974005  | 34.83108235  |             | 3488        |
| 24.19832294            | 14.49799888                              | 19.91672476  |              |             |             |
| ENSG00000197885        | 792.5187479                              | 695.2133556  | 488.8992081  |             |             |
| 906.1295563            | 948.5865528                              | 1124.472985  | 658.8771039  |             |             |
| 993.0630314            | -0.592669905                             | 0.003554336  | 0.028378287  |             |             |
| NKIRAS1 3              | 23891660                                 | 23946591     | -            | 3473        |             |
| protein_coding         | NFKB inhibitor interacting Ras like 1    | [Source:HGNC |              |             |             |
| Symbol;Acc:HGNC:17899] | -                                        | 685          | 750          | 500         | 902         |
| 1146                   | 10.78649884                              | 9.521172598  | 6.669106869  |             | 1038        |
| 12.55749375            | 13.02420334                              | 15.40372903  |              |             |             |
| ENSG00000110274        | 1235.63507                               | 1777.892288  | 1824.571845  |             |             |
| 2354.731352            | 2078.117361                              | 2388.278574  | 1612.699734  |             |             |
| 2273.709096            | -0.494830926                             | 0.003554943  | 0.028378287  |             | CEP164      |
| 11                     | 117314557                                | 117413268    | +            | 12898       |             |
| protein_coding         | centrosomal protein 164                  | [Source:HGNC |              |             |             |
| Symbol;Acc:HGNC:29182] | -                                        | 1068         | 1918         | 1866        | 2344        |
| 2434                   | 4.528387603                              | 6.556320691  | 6.701804004  |             | 2274        |
| 8.786915525            | 7.682926624                              | 8.809357547  |              |             |             |
| ENSG00000157470        | 92.55693406                              | 128.8462086  | 166.2257307  |             |             |
| 31.14192488            | 57.57317228                              | 71.62873292  | 129.2096245  |             |             |
| 53.44794336            | 1.273980114                              | 0.003570174  | 0.028484991  |             | FAM81A      |

|                                                |                                                      |             |              |             |                |      |      |
|------------------------------------------------|------------------------------------------------------|-------------|--------------|-------------|----------------|------|------|
| 15                                             | 59372693                                             | 59523549    | +            | 5578        |                |      |      |
| protein_coding                                 | family with sequence similarity                      |             | 81           | member A    |                |      |      |
| [Source:HGNC Symbol;Acc:HGNC:28379]            |                                                      | -           | 80           | 139         | 170            |      |      |
| 31                                             | 63                                                   | 73          | 0.784343298  | 1.098677545 |                |      |      |
| 1.411798991                                    | 0.268710354                                          | 0.492176232 | 0.610928501  |             |                |      |      |
| ENSG00000134030                                | 462.7846703                                          | 685.9438442 | 624.8131879  |             |                |      |      |
| 854.8960669                                    | 828.8709088                                          | 933.135959  | 591.1805675  |             |                |      |      |
| 872.3009783                                    | -0.559751884                                         | 0.003585663 | 0.028593652  |             | CTIF           |      |      |
| 18                                             | 48539046                                             | 48863217    | +            | 8100        |                |      |      |
| protein_coding                                 | cap binding complex dependent translation initiation |             |              |             |                |      |      |
| factor [Source:HGNC Symbol;Acc:HGNC:23925]     |                                                      | -           | 400          | 740         |                |      |      |
| 639                                            | 851                                                  | 907         | 951          | 2.700658589 | 4.027918354    |      |      |
| 3.65441862                                     | 5.079789987                                          | 4.879562285 | 5.480769452  |             |                |      |      |
| ENSG00000032444                                | 2659.854892                                          | 3188.711925 | 3204.24541   |             |                |      |      |
| 3937.94663                                     | 3814.451128                                          | 4059.288604 | 3017.604076  |             |                |      |      |
| 3937.228788                                    | -0.38345057                                          | 0.00359125  | 0.028609312  |             | PNPLA6         |      |      |
| 19                                             | 7534004                                              | 7561764     | +            | 7172        | protein_coding |      |      |
| patatin like phospholipase domain containing 6 | [Source:HGNC                                         |             |              |             |                |      |      |
| Symbol;Acc:HGNC:16268]                         |                                                      | -           | 2299         | 3440        | 3277           | 3920 | 4174 |
| 4137                                           | 17.53046367                                          | 21.14716333 | 21.16599145  |             |                |      |      |
| 26.42694754                                    | 25.36125622                                          | 26.92720495 |              |             |                |      |      |
| ENSG00000156787                                | 495.1795972                                          | 495.9188604 | 568.1008798  |             |                |      |      |
| 408.8633364                                    | 310.7123583                                          | 284.5525006 | 519.7331124  |             |                |      |      |
| 334.7093984                                    | 0.635440711                                          | 0.00359137  | 0.028609312  |             |                |      |      |
| TBC1D31 8                                      | 123041968                                            | 123152153   | +            | 8611        |                |      |      |
| protein_coding                                 | TBC1 domain family member 31                         |             | [Source:HGNC |             |                |      |      |
| Symbol;Acc:HGNC:30888]                         |                                                      | -           | 428          | 535         | 581            | 407  | 340  |
| 290                                            | 2.718221808                                          | 2.739265645 | 3.125539551  |             |                |      |      |
| 2.285293774                                    | 1.720615875                                          | 1.572137201 |              |             |                |      |      |
| ENSG00000143971                                | 666.4099252                                          | 499.6266649 | 471.2988366  |             |                |      |      |
| 323.4741875                                    | 353.6637726                                          | 381.6928371 | 545.7784756  |             |                |      |      |
| 352.943599                                     | 0.627627141                                          | 0.003596475 | 0.028621426  |             | ETAA1          |      |      |
| 2                                              | 67397319                                             | 67412089    | +            | 7480        |                |      |      |
| protein_coding                                 | "ETAA1, ATR kinase activator                         |             | [Source:HGNC |             |                |      |      |
| Symbol;Acc:HGNC:24648]"                        |                                                      | -           | 576          | 539         | 482            | 322  | 387  |
| 389                                            | 4.211294356                                          | 3.177028606 | 2.985024474  |             |                |      |      |
| 2.081399713                                    | 2.254592017                                          | 2.427694527 |              |             |                |      |      |
| ENSG00000274762                                | 33.5518886                                           | 21.31987624 | 13.68917783  |             | 0              |      |      |
| 0                                              | 4.906077597                                          | 22.85364755 | 1.635359199  |             |                |      |      |
| 3.811776126                                    | 0.003596635                                          | 0.028621426 | AL049777.1   |             | 14             |      |      |
| 28818741                                       | 28819258                                             | +           | 518          | antisense   |                |      |      |
| novel transcript                               |                                                      | -           | 29           | 23          | 14             | 0    |      |
| 0                                              | 5                                                    | 3.061702233 | 1.957636412  | 1.25198963  |                |      |      |
| 0                                              | 0                                                    | 0.450594909 |              |             |                |      |      |
| ENSG00000146676                                | 6225.610777                                          | 5612.689158 | 5630.16328   |             |                |      |      |
| 7742.284357                                    | 7521.066791                                          | 6972.517481 | 5822.821072  |             |                |      |      |
| 7411.95621                                     | -0.348249336                                         | 0.003616086 | 0.028761239  |             | PURB           |      |      |
| 7                                              | 44876293                                             | 44885361    | -            | 9069        |                |      |      |
| protein_coding                                 | purine rich element binding protein B                |             | [Source:HGNC |             |                |      |      |
| Symbol;Acc:HGNC:9702]                          | Others                                               | 5381        | 6055         | 5758        | 7707           | 8230 |      |

|                                     |                                                        |                                        |             |                |             |             |
|-------------------------------------|--------------------------------------------------------|----------------------------------------|-------------|----------------|-------------|-------------|
|                                     | 7106                                                   | 32.44877476                            | 29.43667165 | 29.41133341    |             |             |
| 41.08915155                         |                                                        | 39.54567848                            | 36.57731624 |                |             |             |
| ENSG00000149089                     | 677.979542                                             |                                        | 632.1806781 | 572.0120735    |             |             |
| 378.7259897                         | 466.9823974                                            |                                        | 431.7348286 | 627.3907645    |             |             |
| 425.8144052                         | 0.558348215                                            |                                        | 0.003623779 | 0.02878281     |             | APIP        |
| 11                                  | 34853094                                               |                                        | 34916499    | -              | 5337        |             |
| protein_coding                      | APAF1 interacting protein [Source:HGNC                 |                                        |             |                |             |             |
| Symbol;Acc:HGNC:17581]              | -                                                      | 586                                    | 682         | 585            | 377         | 511         |
| 440                                 | 6.004752698                                            |                                        | 5.634055617 | 5.077630793    |             |             |
| 3.415429804                         | 4.172365014                                            |                                        | 3.848588781 |                |             |             |
| ENSG00000148291                     | 391.0530464                                            |                                        | 515.3848343 | 521.1665558    |             |             |
| 648.9575314                         | 641.5296339                                            |                                        | 897.8122003 | 475.8681455    |             |             |
| 729.4331219                         | -0.614984588                                           |                                        | 0.003624157 | 0.02878281     |             | SURF2       |
| 9                                   | 133356552                                              |                                        | 133361169   | +              | 1008        |             |
| protein_coding                      | surfeit 2 [Source:HGNC Symbol;Acc:HGNC:11475]          |                                        |             |                |             | -           |
| 338                                 | 556                                                    | 533                                    | 646         | 702            | 915         | 18.33795408 |
| 24.31914026                         | 24.49453124                                            |                                        | 30.98654837 | 30.34835655    |             |             |
| 42.37469622                         |                                                        |                                        |             |                |             |             |
| ENSG00000231605                     | 18.51138681                                            |                                        | 29.66243651 | 2.933395248    |             |             |
| 24.10987733                         | 126.1126631                                            |                                        | 80.4596726  | 17.03573952    |             |             |
| 76.894071                           | -2.173757292                                           |                                        | 0.003624446 | 0.02878281     |             |             |
| LINC01363                           | 1                                                      | 167175917                              | 167195792   | -              |             | 1375        |
|                                     | antisense                                              | long intergenic non-protein coding RNA |             |                | 1363        |             |
| [Source:HGNC Symbol;Acc:HGNC:50598] | -                                                      | 16                                     | 32          | 3              |             |             |
| 24                                  | 138                                                    | 82                                     | 0.636373369 | 1.026080037    |             |             |
| 0.101069708                         | 0.84393648                                             |                                        | 4.373558964 | 2.783922814    |             |             |
| ENSG00000174123                     | 2.313923351                                            |                                        | 0.926951141 | 0              | 36.16481599 |             |
| 4.569299387                         | 16.68066383                                            |                                        | 1.080291497 | 19.13825974    |             |             |
| -4.193624326                        | 0.003640091                                            |                                        | 1           | TLR10          | 4           |             |
| 38772239                            | 38782990                                               |                                        | 4217        | protein_coding | toll        |             |
| like receptor 10                    | [Source:HGNC Symbol;Acc:HGNC:15634]                    |                                        |             |                |             | 2           |
| 1                                   | 0                                                      | 36                                     | 5           | 17             | 0.025937082 |             |
| 0.010455152                         | 0                                                      | 0.412762388                            | 0.051668399 | 0.188187753    |             |             |
| ENSG00000107175                     | 745.0833192                                            |                                        | 835.1829779 | 866.3293967    |             |             |
| 1010.605691                         | 1321.441383                                            |                                        | 1111.717184 | 815.5318979    |             |             |
| 1147.921419                         | -0.49300761                                            |                                        | 0.003645902 | 0.028938163    |             | CREB3       |
| 9                                   | 35732335                                               |                                        | 35737004    | +              | 1903        |             |
| protein_coding                      | cAMP responsive element binding protein 3 [Source:HGNC |                                        |             |                |             |             |
| Symbol;Acc:HGNC:2347]               | TF_bZIP                                                | 644                                    | 901         | 886            | 1006        | 1446        |
| 1133                                | 18.50724575                                            |                                        | 20.87468644 | 21.56737995    |             |             |
| 25.55997407                         | 33.11220502                                            |                                        | 27.79311071 |                |             |             |
| ENSG00000169188                     | 1401.080589                                            |                                        | 1625.872301 | 1450.075051    |             |             |
| 1945.868016                         | 1974.851195                                            |                                        | 1989.905073 | 1492.342647    |             |             |
| 1970.208095                         | -0.400415027                                           |                                        | 0.003648146 | 0.028940947    |             | APEX2       |
| X                                   | 55000357                                               |                                        | 55009057    | +              | 3245        |             |
| protein_coding                      | apurinic/aprimidinic endodeoxyribonuclease 2           |                                        |             |                |             |             |
| [Source:HGNC Symbol;Acc:HGNC:17889] | -                                                      |                                        | 1211        | 1754           |             | 1483        |
| 1937                                | 2161                                                   | 2028                                   | 20.40911415 | 23.83136102    |             |             |
| 21.17039229                         | 28.86131641                                            |                                        | 29.02008389 | 29.17422213    |             |             |
| ENSG00000165424                     | 1273.814805                                            |                                        | 1101.217955 | 1713.102825    |             |             |

|                                            |                                          |                        |                                     |               |
|--------------------------------------------|------------------------------------------|------------------------|-------------------------------------|---------------|
| 909.1432909                                | 960.4667312                              | 957.666347             | 1362.711862                         |               |
| 942.4254564                                | 0.532012791                              | 0.003652788            | 0.028957464                         |               |
| ZCCHC24 10                                 | 79382325                                 | 79445627               | -                                   | 5051          |
| protein_coding                             | zinc finger CCHC-type containing 24      |                        |                                     | [Source:HGNC  |
| Symbol;Acc:HGNC:26911]                     | -                                        | 1101                   | 1188                                | 1752 905 1051 |
| 976                                        | 11.92077973                              | 10.36986327            | 16.06790255                         |               |
| 8.663082039                                | 9.06742444                               | 9.020248144            |                                     |               |
| ENSG00000227706                            | 20.82531016                              | 31.51633879            | 44.97872714                         |               |
| 10.04578222                                | 0                                        | 0.981215519            | 32.44012537                         | 3.675665913   |
| 3.157777503                                | 0.003654016                              | 0.028957464            | AL713998.1                          |               |
| 6                                          | 67887646                                 | 67889339               | -                                   | 1605          |
| lincRNA novel transcript                   |                                          | -                      | 18                                  | 34 46 10      |
| 0                                          | 1                                        | 0.613327138            | 0.933980563                         | 1.327655047   |
| 0.301249392                                | 0                                        | 0.029085129            |                                     |               |
| ENSG0000020577                             | 323.9492692                              | 300.3321696            | 430.2313031                         |               |
| 146.6684204                                | 231.206549                               | 229.6044316            | 351.5042473                         |               |
| 202.4931337                                | 0.795145359                              | 0.003658664            | 0.028979272                         | SAMD4A        |
| 14                                         | 54567097                                 | 54793315               | +                                   | 12170         |
| protein_coding                             | sterile alpha motif domain containing 4A |                        |                                     | [Source:HGNC  |
| Symbol;Acc:HGNC:23023]                     | -                                        | 280                    | 324                                 | 440 146 253   |
| 234                                        | 1.258236171                              | 1.173784553            | 1.674806177                         |               |
| 0.580047413                                | 0.905917274                              | 0.897576172            |                                     |               |
| ENSG00000184164                            | 411.8783566                              | 377.2691143            | 611.1240101                         |               |
| 288.3139497                                | 260.4500651                              | 309.0828886            | 466.7571603                         |               |
| 285.9489678                                | 0.707428198                              | 0.003665358            | 0.029017258                         | CRELD2        |
| 22                                         | 49918167                                 | 49927540               | +                                   | 5165          |
| protein_coding                             | cysteine rich with EGF like domains 2    |                        |                                     | [Source:HGNC  |
| Symbol;Acc:HGNC:28150]                     | -                                        | 356                    | 407                                 | 625 287 285   |
| 315                                        | 3.769418736                              | 3.474225802            | 5.60547148                          |               |
| 2.686660482                                | 2.404546233                              | 2.846992111            |                                     |               |
| ENSG00000225826                            | 4.627846703                              | 9.269511408            | 16.62257307                         | 0             |
| 0                                          | 0                                        | 10.1733104             | 0                                   | 5.841849403   |
| 0.003673554                                | 1                                        | LINC00626              | 1                                   | 168786939     |
| 168792886                                  | +                                        | 955                    | lincRNA long intergenic non-protein |               |
| coding RNA 626                             | [Source:HGNC                             | Symbol;Acc:HGNC:44257] | -                                   | 4             |
| 10                                         | 17                                       | 0                      | 0                                   | 0.229061095   |
| 0.461668865                                | 0.824608877                              | 0                      | 0                                   | 0             |
| ENSG00000163481                            | 546.0859109                              | 762.8807889            | 660.9917293                         |               |
| 909.1432909                                | 996.1072664                              | 927.2486659            | 656.6528097                         |               |
| 944.1664077                                | -0.522825578                             | 0.003674909            | 0.029077813                         | RNF25         |
| 2                                          | 218663864                                | 218672411              | -                                   | 2323          |
| protein_coding                             | ring finger protein 25                   |                        |                                     | [Source:HGNC  |
| Symbol;Acc:HGNC:14662]                     | -                                        | 472                    | 823                                 | 676 905 1090  |
| 945                                        | 11.11187895                              | 15.62012782            | 13.48031194                         |               |
| 18.83651631                                | 20.44729609                              | 18.99016047            |                                     |               |
| ENSG00000099625                            | 164.288558                               | 291.0626582            | 224.8936357                         |               |
| 503.2936892                                | 282.3827021                              | 430.753613             | 226.748284                          |               |
| 405.4766681                                | -0.835787674                             | 0.003703128            | 0.029285936                         | CBARP         |
| 19                                         | 1228287                                  | 1238027                | -                                   | 4591          |
| subunit beta associated regulatory protein | [Source:HGNC                             |                        | protein_coding                      | CACN          |

|                                     |                                                      |                |                            |             |             |        |
|-------------------------------------|------------------------------------------------------|----------------|----------------------------|-------------|-------------|--------|
| Symbol;Acc:HGNC:28617]              | -                                                    | 142            | 314                        | 230         | 501         | 309    |
| 439                                 | 1.691514653                                          | 3.015479034    | 2.320721357                |             |             |        |
| 5.27632635                          | 2.932984612                                          | 4.463784947    |                            |             |             |        |
| ENSG0000092203                      | 1423.062861                                          | 1546.154503    | 1394.340541                |             |             |        |
| 1843.401037                         | 2093.652979                                          | 1851.553685    | 1454.519302                |             |             |        |
| 1929.535901                         | -0.407667691                                         | 0.003705135    | 0.029286659                |             |             | TOX4   |
| 14                                  | 21476597                                             | 21499175       | + 7091                     |             |             |        |
| protein_coding                      | TOX high mobility group box family member 4          |                |                            |             |             |        |
| [Source:HGNC Symbol;Acc:HGNC:20161] | HMG                                                  | 1230           | 1668                       |             |             | 1426   |
| 1835                                | 2291 1887                                            | 9.486201355    | 10.37104501                |             |             |        |
| 9.315678587                         | 12.51208827                                          | 14.0791424     | 12.42254134                |             |             |        |
| ENSG00000185024                     | 684.921312                                           | 840.7446847    | 928.9084954                |             |             |        |
| 1224.580853                         | 1157.860465                                          | 1080.318287    | 818.1914974                |             |             |        |
| 1154.253201                         | -0.495583509                                         | 0.003718785    | 0.029379362                |             |             | BRF1   |
| 14                                  | 105209286                                            | 105315589      | - 13167                    |             |             |        |
| protein_coding                      | "BRF1, RNA polymerase III transcription initiation   |                |                            |             |             |        |
| factor subunit                      | [Source:HGNC Symbol;Acc:HGNC:11551]"                 | -              |                            |             |             | 592    |
| 907                                 | 950 1219                                             | 1267 1101      | 2.458836118                |             |             |        |
| 3.037067256                         | 3.342252259                                          | 4.476288677    | 4.193227034                |             |             |        |
| 3.903431111                         |                                                      |                |                            |             |             |        |
| ENSG00000132185                     | 8.09873173                                           | 13.90426711    | 7.822387329                |             |             | 0      |
| 0                                   | 0                                                    | 9.941795391    | 0                          | 5.807743971 |             |        |
| 0.003735337                         | 1                                                    | FCRLA 1        | 161706972                  | 161714352   |             |        |
| +                                   | 3275                                                 | protein_coding | Fc receptor like A         |             |             |        |
| [Source:HGNC Symbol;Acc:HGNC:18504] | -                                                    | 7              | 15                         |             |             | 8      |
| 0                                   | 0                                                    | 0              | 0.116891101                | 0.201936076 |             |        |
| 0.113156925                         | 0                                                    | 0              | 0                          |             |             |        |
| ENSG00000101639                     | 864.2503718                                          | 866.6993167    | 924.0195033                |             |             |        |
| 719.278007                          | 612.2861179                                          | 456.2652166    | 884.9897306                |             |             |        |
| 595.9431138                         | 0.570632337                                          | 0.003739684    | 0.02952266                 |             |             | CEP192 |
| 18                                  | 12991362                                             | 13125052       | + 9901                     |             |             |        |
| protein_coding                      | centrosomal protein 192 [Source:HGNC                 |                |                            |             |             |        |
| Symbol;Acc:HGNC:25515]              | -                                                    | 747            | 935                        | 945         | 716         | 670    |
| 465                                 | 4.126066793                                          | 4.163576114    | 4.421353138                |             |             |        |
| 3.49651325                          | 2.948861259                                          | 2.192400681    |                            |             |             |        |
| ENSG00000170325                     | 534.5162942                                          | 458.8408147    | 503.5661843                |             |             |        |
| 401.8312888                         | 236.6897083                                          | 288.4773627    | 498.9744311                |             |             |        |
| 308.9994533                         | 0.691814963                                          | 0.003740786    | 0.02952266                 |             |             | PRDM10 |
| 11                                  | 129899706                                            | 130002835      | - 6626                     |             |             |        |
| protein_coding                      | PR/SET domain 10 [Source:HGNC Symbol;Acc:HGNC:13995] |                |                            |             |             |        |
| zf-C2H2                             | 462 495                                              | 515 400        | 259 294                    |             |             |        |
| 3.813162003                         | 3.293727951                                          | 3.600462179    | 2.918836553                |             |             |        |
| 1.703361905                         | 2.071294895                                          |                |                            |             |             |        |
| ENSG00000146005                     | 6.941770054                                          | 12.05036483    | 10.75578258                |             |             | 0      |
| 0                                   | 0                                                    | 9.915972488    | 0                          | 5.804271849 |             |        |
| 0.003743387                         | 1                                                    | PSD2 5         | 139795821                  | 139844466   |             |        |
| +                                   | 4513                                                 | protein_coding | pleckstrin and Sec7 domain |             |             |        |
| containing 2                        | [Source:HGNC Symbol;Acc:HGNC:19092]                  | -              |                            |             |             | 6      |
| 13                                  | 11                                                   | 0              | 0                          | 0           | 0.072707737 |        |
| 0.127002414                         | 0.112909324                                          | 0              | 0                          | 0           |             |        |

|                                                                    |              |             |             |             |
|--------------------------------------------------------------------|--------------|-------------|-------------|-------------|
| ENSG00000171792                                                    | 693.0200438  | 532.996906  | 772.4607488 |             |
| 405.8496017                                                        | 519.0724104  | 359.1248801 | 666.1592328 |             |
| 428.0156307                                                        | 0.637342122  | 0.003754677 | 0.029617003 | RHN01       |
| 12                                                                 | 2876258      | 2889523     | +           | 2643        |
| protein_coding HUS1-RAD1 interacting nuclear orphan 1 [Source:HGNC |              |             |             |             |
| Symbol;Acc:HGNC:28206]                                             | -            | 599         | 575         | 790         |
| 366                                                                | 12.39436758  | 9.591899937 | 13.84625686 | 404         |
| 7.390697354                                                        | 9.365042882  | 6.464425848 |             | 568         |
| ENSG00000178802                                                    | 608.5618414  | 817.5709062 | 654.1471404 |             |
| 933.2531683                                                        | 1071.957636  | 969.4409332 | 693.4266294 |             |
| 991.5505792                                                        | -0.515158359 | 0.003757985 | 0.029617562 | MPI         |
| 15                                                                 | 74890005     | 74902219    | +           | 9090        |
| protein_coding mannose phosphate isomerase [Source:HGNC            |              |             |             |             |
| Symbol;Acc:HGNC:7216]                                              | -            | 526         | 882         | 669         |
| 988                                                                | 3.164583604  | 4.277979114 | 3.409295854 | 929         |
| 4.941434548                                                        | 5.623319074  | 5.073867213 |             | 1173        |
| ENSG00000166794                                                    | 2216.738571  | 1885.41862  | 2352.582989 |             |
| 1550.064197                                                        | 1444.812466  | 1765.20672  | 2151.58006  |             |
| 1586.694461                                                        | 0.439313266  | 0.003758623 | 0.029617562 | PPIB        |
| 15                                                                 | 64155812     | 64163205    | -           | 1911        |
| protein_coding peptidylprolyl isomerase B [Source:HGNC             |              |             |             |             |
| Symbol;Acc:HGNC:9255]                                              | -            | 1916        | 2034        | 2406        |
| 1799                                                               | 54.8314247   | 46.92715435 | 58.3226692  | 1543        |
| 39.03969855                                                        | 36.05203472  | 43.9457127  |             | 1581        |
| ENSG00000166188                                                    | 220.9796801  | 307.7477788 | 315.8288884 |             |
| 461.1014039                                                        | 444.1359004  | 426.828751  | 281.5187824 |             |
| 444.0220184                                                        | -0.655425146 | 0.00376457  | 0.02964914  | ZNF319      |
| 16                                                                 | 57994668     | 58000453    | -           | 4274        |
| protein_coding zinc finger protein 319 [Source:HGNC                |              |             |             |             |
| Symbol;Acc:HGNC:13644]                                             | zf-C2H2      | 191         | 332         | 323         |
| 435                                                                | 2.443957009  | 3.424818209 | 3.500825472 | 459         |
| 5.192534422                                                        | 4.955190429  | 4.751172242 |             | 486         |
| ENSG00000136450                                                    | 3579.639425  | 2667.765383 | 3010.641323 |             |
| 2445.143392                                                        | 2343.136726  | 2039.947065 | 3086.015377 |             |
| 2276.075728                                                        | 0.438857715  | 0.003772456 | 0.029695953 | SRSF1       |
| 17                                                                 | 58003360     | 58007346    | -           | 3340        |
| protein_coding serine and arginine rich splicing factor 1          |              |             |             |             |
| [Source:HGNC Symbol;Acc:HGNC:10780]                                | -            |             | 3094        | 2878        |
| 2434                                                               | 2564         | 2079        | 50.66039309 | 37.99078617 |
| 42.70371695                                                        | 35.235085    | 33.45262112 | 29.05721979 |             |
| ENSG00000123146                                                    | 1767.83744   | 1941.035689 | 2894.283312 |             |
| 1270.791451                                                        | 1264.78207   | 1838.797883 | 2201.052147 |             |
| 1458.123802                                                        | 0.594355046  | 0.003774437 | 0.029696254 | ADGRE5      |
| 19                                                                 | 14380501     | 14408725    | +           | 5382        |
| protein_coding adhesion G protein-coupled receptor E5 [Source:HGNC |              |             |             |             |
| Symbol;Acc:HGNC:1711]                                              | -            | 1528        | 2094        | 2960        |
| 1874                                                               | 15.52652881  | 17.15406068 | 25.47712826 | 1265        |
| 11.36444022                                                        | 11.20600971  | 16.2544369  |             | 1384        |
| ENSG00000153944                                                    | 1487.852715  | 1210.59819  | 1713.102825 |             |
| 1113.07267                                                         | 1026.264642  | 1009.67077  | 1470.51791  |             |

|                        |                                                |                        |                     |                    |
|------------------------|------------------------------------------------|------------------------|---------------------|--------------------|
| 1049.669361            | 0.486274332                                    | 0.003782587            | 0.029745067         | MSI2               |
| 17                     | 57255851                                       | 57684685               | + 21479             |                    |
| protein_coding         | musashi RNA binding protein 2                  | [Source:HGNC           |                     |                    |
| Symbol;Acc:HGNC:18585] | -                                              | 1286 1306              | 1752 1108           | 1123               |
| 1029                   | 3.274323788                                    | 2.680791741            | 3.778526737         |                    |
| 2.494174983            | 2.278370223                                    | 2.236389026            |                     |                    |
| ENSG00000116096        | 422.2910116                                    | 590.4678767            | 555.3895004         |                    |
| 644.9392185            | 840.7510872                                    | 881.1315365            | 522.7161296         |                    |
| 788.9406141            | -0.592838871                                   | 0.003792465            | 0.029807408         | SPR                |
| 2                      | 72887360                                       | 72892158               | + 1480              |                    |
| protein_coding         | sepiapterin reductase                          | [Source:HGNC           |                     |                    |
| Symbol;Acc:HGNC:11257] | -                                              | 365 637                | 568 642             | 920                |
| 898                    | 13.48732621                                    | 18.976306              | 17.77825275         |                    |
| 20.97367476            | 27.08848457                                    | 28.32439597            |                     |                    |
| ENSG00000270083        | 18.51138681                                    | 8.342560268            | 3.911193665         | 0                  |
| 0                      | 0                                              | 10.25504691            | 0                   | 5.847550684        |
| 0.003797912            | 1                                              | AL021878.2             | 22                  | 42089630           |
| 42090028               | -                                              | 399                    | sense_intronic      | "novel transcript, |
| sense intronic to      | NDUFA6"                                        | -                      | 16                  | 9 4 0              |
| 0                      | 0                                              | 2.193015997            | 0.994497216         | 0.464397156        |
| 0                      | 0                                              | 0                      |                     |                    |
| ENSG00000143294        | 1563.055224                                    | 2125.498966            | 1892.039935         |                    |
| 2512.450133            | 2729.699454                                    | 2349.029954            | 1860.198042         |                    |
| 2530.39318             | -0.44342313                                    | 0.003808428            | 0.029917492         | PRCC               |
| 1                      | 156750610                                      | 156800817              | + 4108              |                    |
| protein_coding         | proline rich mitotic checkpoint control factor | [Source:HGNC           |                     |                    |
| Symbol;Acc:HGNC:9343]  | -                                              | 1351 2293              |                     | 1935               |
| 2501                   | 2987 2394                                      | 17.98538036            | 24.6097713          |                    |
| 21.81991177            | 29.43638492                                    | 31.68570579            | 27.20443728         |                    |
| ENSG00000160209        | 2552.257457                                    | 3322.192889            | 2813.126043         |                    |
| 4028.35867             | 3813.537268                                    | 3661.896319            | 2895.858796         |                    |
| 3834.597419            | -0.404733231                                   | 0.003810549            | 0.029918782         | PDXK               |
| 21                     | 43719094                                       | 43762307               | + 11912             |                    |
| protein_coding         | pyridoxal kinase                               | [Source:HGNC           |                     |                    |
| Symbol;Acc:HGNC:8819]  | -                                              | 2206 3584              | 2877 4010           | 4173 3732          |
| 10.12780979            | 13.26530605                                    | 11.18813332            | 16.27649557         |                    |
| 15.26589594            | 14.62523948                                    |                        |                     |                    |
| ENSG00000103740        | 10.41265508                                    | 8.342560268            | 10.75578258         | 0                  |
| 0                      | 0                                              | 9.836999309            | 0                   | 5.790667618        |
| 0.003820374            | 1                                              | ACSBG1                 | 15                  | 78167468 78245688  |
| -                      | 8230                                           | protein_coding         | acyl-CoA synthetase | bubblegum          |
| family member 1        | [Source:HGNC                                   | Symbol;Acc:HGNC:29567] | -                   | 9                  |
| 9                      | 11                                             | 0                      | 0                   | 0.059804985        |
| 0.048214385            | 0.061914919                                    | 0                      | 0                   |                    |
| ENSG00000100578        | 842.2680999                                    | 685.0168931            | 833.0842506         |                    |
| 514.3440497            | 636.9603346                                    | 383.6552681            | 786.7897479         |                    |
| 511.6532174            | 0.619992442                                    | 0.003823463            | 0.030001686         |                    |
| KIAA0586               | 14                                             | 58427385               | 58551289            | + 10184            |
| protein_coding         | KIAA0586                                       | [Source:HGNC           |                     |                    |
| Symbol;Acc:HGNC:19960] | -                                              | 728 739                | 852 512             | 697 391            |



|                                                              |                                                  |             |             |             |
|--------------------------------------------------------------|--------------------------------------------------|-------------|-------------|-------------|
| 3.909378331                                                  | 3.199337126                                      | 3.87546358  | 2.430819921 |             |
| 2.98244872                                                   | 1.792273991                                      |             |             |             |
| ENSG00000169084                                              | 208.2531016                                      | 278.0853423 | 329.5180662 |             |
| 131.5997471                                                  | 158.0977588                                      | 171.7127159 | 271.95217   |             |
| 153.8034073                                                  | 0.82331551                                       | 0.003825033 | 0.030001686 | DHR SX      |
| X                                                            | 2219516                                          | 2502805     | -           | 3620        |
| dehydrogenase/reductase X-linked                             | [Source:HGNC Symbol;Acc:HGNC:18399]              |             |             |             |
| -                                                            | 180                                              | 300         | 337         | 131         |
| 2.719309546                                                  | 3.653815739                                      | 4.312447154 | 1.749701409 |             |
| 2.082553324                                                  | 2.256708756                                      |             |             |             |
| ENSG00000138413                                              | 1756.267824                                      | 1531.323285 | 1568.38866  |             |
| 1157.274112                                                  | 1251.988032                                      | 1230.444261 | 1618.659923 |             |
| 1213.235468                                                  | 0.415494587                                      | 0.003836884 | 0.030079206 | IDH1        |
| 2                                                            | 208236227                                        | 208266074   | -           | 4721        |
| protein_coding                                               | "isocitrate dehydrogenase (NADP(+)) 1, cytosolic |             |             |             |
| [Source:HGNC Symbol;Acc:HGNC:5382]"                          | -                                                | 1518        | 1652        | 1604        |
| 1152                                                         | 1370                                             | 1254        | 17.5845996  | 15.42801316 |
| 15.73884359                                                  | 11.79830707                                      | 12.64576668 | 12.39965415 |             |
| ENSG00000100503                                              | 1800.232367                                      | 1686.124125 | 2064.132457 |             |
| 1417.459871                                                  | 1147.808006                                      | 1473.78571  | 1850.162983 |             |
| 1346.351196                                                  | 0.458820673                                      | 0.003841999 | 0.030092405 | NIN         |
| 14                                                           | 50719763                                         | 50831121    | -           | 13683       |
| protein_coding                                               | ninein [Source:HGNC Symbol;Acc:HGNC:14906]       |             |             |             |
| 1556                                                         | 1819                                             | 2111        | 1411        | 1256        |
| 5.861183658                                                  | 7.146762701                                      | 4.985938339 | 4.000063726 |             |
| 5.124301111                                                  |                                                  |             |             |             |
| ENSG00000257242                                              | 21.98227184                                      | 21.31987624 | 27.37835565 |             |
| 115.5264955                                                  | 77.67808958                                      | 33.36132766 | 23.56016791 |             |
| 75.52197092                                                  | -1.679714008                                     | 0.003842505 | 0.030092405 |             |
| LINC01619                                                    | 12                                               | 91984976    | 92142914    | -           |
| processed_transcript                                         | long intergenic non-protein coding RNA           |             |             |             |
| 1619                                                         | [Source:HGNC Symbol;Acc:HGNC:27409]              |             |             |             |
| 28                                                           | 115                                              | 85          | 34          | 0.285304336 |
| 0.356139829                                                  | 1.526719017                                      | 1.017038942 | 0.278433735 | 0.435797778 |
| ENSG00000135924                                              | 480.1390954                                      | 618.2764109 | 565.1674845 |             |
| 852.8869105                                                  | 726.5186025                                      | 820.2961743 | 554.5276636 |             |
| 799.9005624                                                  | -0.527304182                                     | 0.003855815 | 0.030166687 | DNAJB2      |
| 2                                                            | 219279267                                        | 219286900   | +           | 5886        |
| protein_coding                                               | DnaJ heat shock protein family (Hsp40) member B2 |             |             |             |
| [Source:HGNC Symbol;Acc:HGNC:5228]                           | -                                                | 415         | 667         | 578         |
| 849                                                          | 795                                              | 836         | 3.855871495 | 4.996196768 |
| 4.548938197                                                  | 6.974107686                                      | 5.885799566 | 6.630282843 |             |
| ENSG00000188191                                              | 341.3036943                                      | 486.6493489 | 299.2063153 |             |
| 610.783559                                                   | 497.1397733                                      | 701.5690964 | 375.7197862 |             |
| 603.1641429                                                  | -0.681659463                                     | 0.00385651  | 0.030166687 |             |
| PRKAR1B                                                      | 7                                                | 549197      | 727650      | -           |
| 4491                                                         | protein_coding                                   |             |             |             |
| protein kinase cAMP-dependent type I regulatory subunit beta | [Source:HGNC Symbol;Acc:HGNC:9390]               |             |             |             |
| 608                                                          | 544                                              | 715         | 3.592308895 | 5.154068738 |
| 3.156318546                                                  | 6.545785062                                      | 5.278547602 | 7.432056842 | 306         |

|                                                            |                                                        |              |                |             |
|------------------------------------------------------------|--------------------------------------------------------|--------------|----------------|-------------|
| ENSG00000160226                                            | 170.0733663                                            | 272.5236354  | 262.0499755    |             |
| 360.6435817                                                | 399.3567664                                            | 405.2420095  | 234.8823258    |             |
| 388.4141192                                                | -0.723219645                                           | 0.00385791   | 0.030166687    |             |
| CFAP410 21                                                 | 44328944                                               | 44339402     | - 6063         |             |
| protein_coding                                             | cilia and flagella associated protein 410 [Source:HGNC |              |                |             |
| Symbol;Acc:HGNC:1260]                                      | -                                                      | 147 294      | 268 359        | 437         |
| 413                                                        | 1.325941853                                            | 2.137931175  | 2.047621503    |             |
| 2.862912646                                                | 3.140888117                                            | 3.179863804  |                |             |
| ENSG00000266903                                            | 1.156961676                                            | 29.66243651  | 25.42275882    | 0           |
| 0                                                          | 1.962431039                                            | 18.74738567  | 0.65414368     |             |
| 4.857201396                                                | 0.003867556                                            | 1 AC243964.2 | 19             |             |
| 44632199                                                   | 44718759                                               | - 1418       | antisense      | "novel      |
| transcript, antisense to CEACAM16, CEACAM19, PVR & IGSF23" |                                                        |              |                | -           |
| 1                                                          | 32 26                                                  | 0 0          | 2              | 0.038567233 |
| 0.994964775                                                | 0.849375193                                            | 0            | 0              | 0.065841513 |
| ENSG00000184481                                            | 157.3467879                                            | 251.2037592  | 219.0268452    |             |
| 387.7671937                                                | 360.0607917                                            | 308.1016731  | 209.1924641    |             |
| 351.9765528                                                | -0.748104114                                           | 0.003880498  | 0.030327797    | FOX04       |
| X                                                          | 71096197                                               | 71103535     | + 3447         |             |
| protein_coding                                             | forkhead box 04 [Source:HGNC Symbol;Acc:HGNC:7139]     |              |                |             |
| Fork                                                       | 136 271                                                | 224 386      | 394 314        |             |
| 2.15770634                                                 | 3.466266624                                            | 3.010295925  | 5.414361361    |             |
| 4.980965529                                                | 4.25240285                                             |              |                |             |
| ENSG00000102032                                            | 10.41265508                                            | 12.05036483  | 5.866790497    |             |
| 21.09614266                                                | 66.71177105                                            | 41.21105182  | 9.443270136    |             |
| 43.00632184                                                | -2.189053659                                           | 0.003909465  | 0.030538576    | RENBP       |
| X                                                          | 153935263                                              | 153944691    | - 2057         |             |
| protein_coding                                             | renin binding protein [Source:HGNC                     |              |                |             |
| Symbol;Acc:HGNC:9959]                                      | -                                                      | 9 13         | 6 21           | 73          |
| 42                                                         | 0.239278088                                            | 0.278639716  | 0.135119931    |             |
| 0.49361258                                                 | 1.546490178                                            | 0.953149522  |                |             |
| ENSG00000197530                                            | 1033.166776                                            | 1293.096841  | 1282.871522    |             |
| 1733.902011                                                | 1542.595473                                            | 1637.648702  | 1203.045047    |             |
| 1638.048729                                                | -0.444523942                                           | 0.003917045  | 0.030582157    | MIB2        |
| 1                                                          | 1615415 1630610                                        | + 8767       | protein_coding |             |
| mindbomb E3 ubiquitin protein ligase 2 [Source:HGNC        |                                                        |              |                |             |
| Symbol;Acc:HGNC:30577]                                     | -                                                      | 893 1395     | 1312 1726      | 1688        |
| 1669                                                       | 5.570512654                                            | 7.015476255  | 6.932426668    |             |
| 9.518992865                                                | 8.390349147                                            | 8.88692195   |                |             |
| ENSG00000138594                                            | 2775.55106                                             | 1967.917272  | 2010.353544    |             |
| 1470.702517                                                | 1812.184137                                            | 1517.940409  | 2251.273959    |             |
| 1600.275688                                                | 0.491774588                                            | 0.003927831  | 0.030650719    | TMOD3       |
| 15                                                         | 51829628                                               | 51947295     | + 10632        |             |
| protein_coding                                             | tropomodulin 3 [Source:HGNC Symbol;Acc:HGNC:11873]     |              |                |             |
| -                                                          | 2399 2123                                              | 2056 1464    | 1983 1547      |             |
| 12.33985319                                                | 8.803776004                                            | 8.957990513  | 6.657747578    |             |
| 8.127675277                                                | 6.792370726                                            |              |                |             |
| ENSG00000129355                                            | 220.9796801                                            | 303.1130231  | 379.3857855    |             |
| 122.5585431                                                | 154.4423193                                            | 213.9049832  | 301.1594962    |             |
| 163.6352819                                                | 0.88111068                                             | 0.003933285  | 0.030677619    | CDKN2D      |

|                        |                                                        |             |                |                |                  |
|------------------------|--------------------------------------------------------|-------------|----------------|----------------|------------------|
| 19                     | 10566462                                               | 10569059    | -              | 1503           |                  |
| protein_coding         | cyclin dependent kinase inhibitor 2D [Source:HGNC      |             |                |                |                  |
| Symbol;Acc:HGNC:1790]  | -                                                      | 191         | 327            | 388            | 122 169          |
| 218                    | 6.949748675                                            | 9.592299495 | 11.9584585     |                |                  |
| 3.924660249            | 4.899889902                                            | 6.770855554 |                |                |                  |
| ENSG0000070047         | 1441.574248                                            | 2061.539337 | 2146.267523    |                |                  |
| 2873.093715            | 2226.162661                                            | 2968.176946 | 1883.127036    |                |                  |
| 2689.144441            | -0.513393898                                           | 0.003956395 | 0.030842124    |                | PHRF1            |
| 11                     | 576486                                                 | 612222 +    | 5769           | protein_coding | PHD              |
| and ring finger        | domains 1 [Source:HGNC Symbol;Acc:HGNC:24351]          |             |                |                |                  |
| 1246                   | 2224                                                   | 2195        | 2860           | 2436           | 3025 11.81169478 |
| 16.99684062            | 17.6252969                                             | 23.96992696 | 18.40074228    |                |                  |
| 24.47771511            |                                                        |             |                |                |                  |
| ENSG00000120656        | 830.6984832                                            | 928.8050431 | 800.8169028    |                |                  |
| 1324.034097            | 1135.013968                                            | 1084.243149 | 853.440143     |                |                  |
| 1181.097071            | -0.468376453                                           | 0.00396455  | 0.030889947    |                | TAF12            |
| 1                      | 28589323                                               | 28643085    | -              | 2337           |                  |
| protein_coding         | TATA-box binding protein associated factor 12          |             |                |                |                  |
| [Source:HGNC           | Symbol;Acc:HGNC:11545]                                 |             |                |                |                  |
| 1318                   | 1242                                                   | 1105        | 16.80197927    | 18.90353245    | 819              |
| 16.23407863            | 27.26829064                                            | 23.15908951 | 22.07240221    |                |                  |
| ENSG00000169972        | 491.7087122                                            | 723.0218899 | 578.8566624    |                |                  |
| 959.372202             | 901.0658391                                            | 784.9724156 | 597.8624215    |                |                  |
| 881.8034856            | -0.559393708                                           | 0.003967982 | 0.030900937    |                | PUSL1            |
| 1                      | 1308567                                                | 1311677 +   | 2489           | protein_coding |                  |
| pseudouridylate        | synthase like 1 [Source:HGNC Symbol;Acc:HGNC:26914]    |             |                |                |                  |
| -                      | 425                                                    | 780         | 592            | 955            | 986 800          |
| 9.338104855            | 13.81667888                                            | 11.01791115 | 18.55152823    |                |                  |
| 17.26277524            | 15.00414064                                            |             |                |                |                  |
| ENSG00000172995        | 9.255693406                                            | 21.31987624 | 7.822387329    |                | 0                |
| 0                      | 0.981215519                                            | 12.79931899 | 0.32707184     |                |                  |
| 5.211345548            | 0.00399387                                             | 1           | ARPP21         | 3              | 35638945         |
| 35794496               | +                                                      | 10092       | protein_coding | cAMP regulated |                  |
| phosphoprotein 21      | [Source:HGNC Symbol;Acc:HGNC:16968]                    |             |                |                |                  |
| 23                     | 8                                                      | 0           | 0              | 1              | 0.043351832      |
| 0.10048114             | 0.036721059                                            | 0           | 0              | 0.004625608    |                  |
| ENSG00000075399        | 409.5644332                                            | 724.8757921 | 701.0814644    |                |                  |
| 854.8960669            | 866.3391638                                            | 1186.289563 | 611.8405632    |                |                  |
| 969.1749313            | -0.662147249                                           | 0.00399468  | 0.031093014    |                | VPS9D1           |
| 16                     | 89707134                                               | 89720986    | -              | 3428           |                  |
| protein_coding         | VPS9 domain containing 1 [Source:HGNC                  |             |                |                |                  |
| Symbol;Acc:HGNC:13526] | -                                                      | 354         | 782            | 717            | 851 948          |
| 1209                   | 5.647511989                                            | 10.05772826 | 9.689041102    |                |                  |
| 12.00300435            | 12.05108423                                            | 16.46385466 |                |                |                  |
| ENSG00000102393        | 870.0351801                                            | 810.1552971 | 874.151784     |                |                  |
| 621.8339194            | 443.2220405                                            | 666.2453377 | 851.4474204    |                |                  |
| 577.1004326            | 0.56148878                                             | 0.003999309 | 0.031100911    |                | GLA              |
| X                      | 101397803                                              | 101408012   | -              | 2275           |                  |
| protein_coding         | galactosidase alpha [Source:HGNC Symbol;Acc:HGNC:4296] |             |                |                |                  |
| -                      | 752                                                    | 874         | 894            | 619            | 485 679          |

|                                               |                                                 |               |                 |        |
|-----------------------------------------------|-------------------------------------------------|---------------|-----------------|--------|
| 18.07719956                                   | 16.93807258                                     | 18.20365406   | 13.15559407     |        |
| 9.290068908                                   | 13.93267187                                     |               |                 |        |
| ENSG00000145860                               | 2026.996856                                     | 1692.612783   | 2077.821634     |        |
| 1464.675048                                   | 1562.70039                                      | 1135.266356   | 1932.477091     |        |
| 1387.547265                                   | 0.477598832                                     | 0.003999764   | 0.031100911     | RNF145 |
| 5                                             | 159157409                                       | 159210053     | - 4614          |        |
| protein_coding                                | ring finger protein 145 [Source:HGNC            |               |                 |        |
| Symbol;Acc:HGNC:20853]                        | -                                               | 1752 1826     | 2125 1458       | 1710   |
| 1157                                          | 20.76592229                                     | 17.44846156   | 21.33456538     |        |
| 15.27851519                                   | 16.15017074                                     | 11.705819     |                 |        |
| ENSG00000105732                               | 768.2225527                                     | 885.2383395   | 794.9501123     |        |
| 1199.466397                                   | 1230.055395                                     | 983.1779505   | 816.1370015     |        |
| 1137.566581                                   | -0.478725405                                    | 0.004003536   | 0.031114414     | ZNF574 |
| 19                                            | 42068477                                        | 42081549      | + 4666          |        |
| protein_coding                                | zinc finger protein 574 [Source:HGNC            |               |                 |        |
| Symbol;Acc:HGNC:26166]                        | zf-C2H2                                         | 664 955       | 813 1194        | 1346   |
| 1002                                          | 7.782480795                                     | 9.023865116   | 8.071388783     |        |
| 12.37259533                                   | 12.5706844                                      | 10.02464548   |                 |        |
| ENSG00000159399                               | 1043.579431                                     | 756.3921309   | 559.300694      |        |
| 593.7057292                                   | 443.2220405                                     | 427.8099665   | 786.4240855     |        |
| 488.2459121                                   | 0.687060504                                     | 0.004018409   | 0.031214137     | HK2    |
| 2                                             | 74833981                                        | 74893359      | + 6064          |        |
| protein_coding                                | hexokinase 2 [Source:HGNC Symbol;Acc:HGNC:4923] | -             |                 |        |
| 902                                           | 816 572                                         | 591 485       | 436 8.134709674 |        |
| 5.932871255                                   | 4.369575945                                     | 4.712262821   | 3.485307844     |        |
| 3.356397064                                   |                                                 |               |                 |        |
| ENSG00000167130                               | 396.8378548                                     | 497.7727626   | 529.9667416     |        |
| 235.071304                                    | 302.4876194                                     | 354.2188025   | 474.8591197     |        |
| 297.259242                                    | 0.676353043                                     | 0.004023319   | 0.031225134     | DOLPP1 |
| 9                                             | 129081100                                       | 129090438     | + 2249          |        |
| protein_coding                                | dolichyldiphosphatase 1 [Source:HGNC            |               |                 |        |
| Symbol;Acc:HGNC:29565]                        | -                                               | 343 537       | 542 234         | 331    |
| 361                                           | 8.340640016                                     | 10.52734336   | 11.16380615     |        |
| 5.030690722                                   | 6.413530082                                     | 7.493138885   |                 |        |
| ENSG00000135045                               | 765.9086293                                     | 875.041877    | 1058.955685     |        |
| 653.9804225                                   | 643.3573537                                     | 576.9547254   | 899.9687303     |        |
| 624.7641672                                   | 0.527093778                                     | 0.00402391    | 0.031225134     |        |
| C9orf40 9                                     | 74946581                                        | 74952886      | - 2327          |        |
| protein_coding                                | chromosome 9 open reading frame 40 [Source:HGNC |               |                 |        |
| Symbol;Acc:HGNC:23433]                        | -                                               | 662 944       | 1083 651        | 704    |
| 588                                           | 15.55809141                                     | 17.88584937   | 21.55929371     |        |
| 13.52651199                                   | 13.18362598                                     | 11.79578854   |                 |        |
| ENSG00000131652                               | 603.9339947                                     | 629.3998246   | 551.4783067     |        |
| 759.4611358                                   | 1113.995191                                     | 774.1790449   | 594.9373754     |        |
| 882.5451238                                   | -0.569332956                                    | 0.004028974   | 0.031248566     | THOC6  |
| 16                                            | 3024027 3027755                                 | + 1860        | protein_coding  | THO    |
| complex 6 [Source:HGNC Symbol;Acc:HGNC:28369] | -                                               | 522           | 679             |        |
| 564                                           | 756 1219                                        | 789 15.348017 | 16.09499285     |        |
| 14.04651591                                   | 19.65214988                                     | 28.55941841   | 19.80204736     |        |
| ENSG00000004478                               | 3098.343368                                     | 3620.671156   | 3138.732916     |        |

|                                                                                             |               |                |                  |        |
|---------------------------------------------------------------------------------------------|---------------|----------------|------------------|--------|
| 4543.707298                                                                                 | 3740.428478   | 4811.880907    | 3285.915813      |        |
| 4365.338895                                                                                 | -0.409564465  | 0.004036168    | 0.031288492      | FKBP4  |
| 12                                                                                          | 2794953       | 2805423 + 5180 | protein_coding   | FK506  |
| binding protein 4 [Source:HGNC Symbol;Acc:HGNC:3720]                                        | -             |                |                  | 2678   |
| 3906                                                                                        | 3210 4523     | 4093 4904      | 28.27323648      |        |
| 33.24577315                                                                                 | 28.70633366   | 42.21803781    | 34.43266067      |        |
| 44.19434866                                                                                 |               |                |                  |        |
| ENSG00000119711                                                                             | 291.5543423   | 309.601681     | 381.3413823      |        |
| 196.8973315                                                                                 | 208.3600521   | 201.1491815    | 327.4991352      |        |
| 202.1355217                                                                                 | 0.69661101    | 0.004061467    | 0.031463724      |        |
| ALDH6A1 14                                                                                  | 74056850      | 74084493       | - 6680           |        |
| protein_coding aldehyde dehydrogenase 6 family member A1 [Source:HGNC Symbol;Acc:HGNC:7179] | -             | 252 334        | 390 196          | 228    |
| 205                                                                                         | 2.063092931   | 2.204468829    | 2.704522509      |        |
| 1.418668172                                                                                 | 1.487363029   | 1.432595011    |                  |        |
| ENSG00000206560                                                                             | 4626.689741   | 3815.330896    | 4006.040111      |        |
| 3427.620894                                                                                 | 3187.543252   | 2839.637713    | 4149.353583      |        |
| 3151.60062                                                                                  | 0.396607082   | 0.004062889    | 0.031463724      |        |
| ANKRD28 3                                                                                   | 15667236      | 15859771       | - 11276          |        |
| protein_coding ankyrin repeat domain 28 [Source:HGNC Symbol;Acc:HGNC:29024]                 | -             | 3999 4116      | 4097 3412        | 3488   |
| 2894                                                                                        | 19.39505653   | 16.09363906    | 16.83113303      |        |
| 14.63036536                                                                                 | 13.47969317   | 11.98090144    |                  |        |
| ENSG00000204946                                                                             | 215.1948717   | 298.4782674    | 351.0296314      |        |
| 533.4310359                                                                                 | 384.7350084   | 497.4762684    | 288.2342568      |        |
| 471.8807709                                                                                 | -0.709064994  | 0.004065496    | 0.03146797       | ZNF783 |
| 7                                                                                           | 149262171     | 149297302      | + 6726           |        |
| protein_coding zinc finger family member 783 [Source:HGNC Symbol;Acc:HGNC:27222]            | zf-C2H2       | 186 322        | 359 531          | 421    |
| 507                                                                                         | 1.512344718   | 2.110731379    | 2.472521299      |        |
| 3.817146907                                                                                 | 2.727619776   | 3.518820652    |                  |        |
| ENSG00000116337                                                                             | 2900.502921   | 3481.628485    | 3458.472998      |        |
| 4427.176224                                                                                 | 3845.522364   | 4726.515157    | 3280.201468      |        |
| 4333.071249                                                                                 | -0.401294009  | 0.004069145    | 0.03148027       | AMPD2  |
| 1                                                                                           | 109616104     | 109632051      | + 6823           |        |
| protein_coding adenosine monophosphate deaminase 2 [Source:HGNC Symbol;Acc:HGNC:469]        | -             | 2507 3756      | 3537 4407        | 4208   |
| 4817                                                                                        | 20.09433672   | 24.2708044     | 24.0138694       |        |
| 31.22977791                                                                                 | 26.87564882   | 32.9569726     |                  |        |
| ENSG00000175221                                                                             | 1867.336145   | 2657.568921    | 2395.60612       |        |
| 3585.339674                                                                                 | 2991.063379   | 2950.515067    | 2306.837062      |        |
| 3175.639373                                                                                 | -0.460605995  | 0.004077509    | 0.031529025      | MED16  |
| 19                                                                                          | 867630 893218 | - 4222         | protein_coding   |        |
| mediator complex subunit 16 [Source:HGNC Symbol;Acc:HGNC:17556]                             | -             |                |                  |        |
| 1614                                                                                        | 2867 2450     | 3569 3273      | 3007 20.90643652 |        |
| 29.9394227                                                                                  | 26.88130269   | 40.87234311    | 33.78207907      |        |
| 33.2476715                                                                                  |               |                |                  |        |
| ENSG00000081059                                                                             | 78.67339395   | 77.86389583    | 126.1359957      |        |
| 44.20144177                                                                                 | 41.12369448   | 24.53038799    | 94.22442849      |        |
| 36.61850808                                                                                 | 1.363928032   | 0.004110711    | 0.031769689      | TCF7   |

|                                             |                                                       |             |      |             |                  |
|---------------------------------------------|-------------------------------------------------------|-------------|------|-------------|------------------|
| 5                                           | 134114711                                             | 134151865   | +    | 10063       |                  |
| protein_coding                              | transcription factor 7 [Source:HGNC                   |             |      |             |                  |
| Symbol;Acc:HGNC:11639]                      | HMG                                                   | 68          | 84   | 129         | 44 45            |
| 25                                          | 0.369552507                                           | 0.368032161 |      | 0.593833499 |                  |
| 0.211410435                                 | 0.194869396                                           | 0.115973449 |      |             |                  |
| ENSG00000183751                             | 1203.240143                                           | 1545.227552 |      | 1324.916854 |                  |
| 2124.68294                                  | 1642.2062                                             | 1853.516116 |      | 1357.794849 |                  |
| 1873.468419                                 | -0.46377763                                           | 0.004113057 |      | 0.031771755 | TBL3             |
| 16                                          | 1972037                                               | 1982933     | +    | 7139        | protein_coding   |
| transducin beta                             | like 3 [Source:HGNC Symbol;Acc:HGNC:11587]            |             |      |             |                  |
| 1040                                        | 1667                                                  | 1355        | 2115 | 1797        | 1889 7.966923923 |
| 10.29513808                                 | 8.792337877                                           | 14.32432633 |      | 10.96905699 |                  |
| 12.35209468                                 |                                                       |             |      |             |                  |
| ENSG00000144647                             | 629.3871516                                           | 1050.235643 |      | 873.1739856 |                  |
| 1265.76856                                  | 1211.778197                                           | 1263.805589 |      | 850.9322599 |                  |
| 1247.117449                                 | -0.550213932                                          | 0.00412101  |      | 0.031817114 |                  |
| POMGNT2                                     | 3                                                     | 43079232    |      | 43106076    | - 2668           |
| protein_coding                              | "protein O-linked mannose N-                          |             |      |             |                  |
| acetylglucosaminyltransferase 2 (beta 1,4-) | [Source:HGNC                                          |             |      |             |                  |
| Symbol;Acc:HGNC:25902]"                     | -                                                     | 544         | 1133 | 893         | 1260 1326        |
| 1288                                        | 11.15084521                                           | 18.72311232 |      | 15.50486858 |                  |
| 22.83420714                                 | 21.65789763                                           | 22.53596054 |      |             |                  |
| ENSG00000115561                             | 1404.551474                                           | 1169.81234  |      | 1294.605103 |                  |
| 1005.5828                                   | 981.4855083                                           | 804.596726  |      | 1289.656306 |                  |
| 930.5550115                                 | 0.47037502                                            | 0.004128952 |      | 0.031859081 | CHMP3            |
| 2                                           | 86503431                                              | 86563479    |      | - 7018      |                  |
| protein_coding                              | charged multivesicular body protein 3 [Source:HGNC    |             |      |             |                  |
| Symbol;Acc:HGNC:29865]                      | -                                                     | 1214        | 1262 | 1324        | 1001 1074        |
| 820                                         | 9.460193848                                           | 7.928297698 |      | 8.739308635 |                  |
| 6.896391852                                 | 6.668827982                                           | 5.454394228 |      |             |                  |
| ENSG00000175198                             | 542.6150259                                           | 450.4982545 |      | 491.8326033 |                  |
| 232.0575693                                 | 385.6488683                                           | 310.0641042 |      | 494.9819612 |                  |
| 309.2568472                                 | 0.677178062                                           | 0.004130614 |      | 0.031859081 | PCCA             |
| 13                                          | 100089015                                             | 100530437   |      | + 7288      |                  |
| protein_coding                              | propionyl-CoA carboxylase subunit alpha [Source:HGNC  |             |      |             |                  |
| Symbol;Acc:HGNC:8653]                       | -                                                     | 469         | 486  | 503         | 231 422          |
| 316                                         | 3.519323516                                           | 2.940098383 |      | 3.197143113 |                  |
| 1.532515347                                 | 2.52326396                                            | 2.024066395 |      |             |                  |
| ENSG00000125107                             | 6069.420951                                           | 5670.160129 |      | 6380.134665 |                  |
| 5069.101708                                 | 4683.531872                                           | 4431.169286 |      | 6039.905248 |                  |
| 4727.934289                                 | 0.35330823                                            | 0.004137656 |      | 0.031897299 | CNOT1            |
| 16                                          | 58519951                                              | 58629886    |      | - 10852     |                  |
| protein_coding                              | CCR4-NOT transcription complex subunit 1 [Source:HGNC |             |      |             |                  |
| Symbol;Acc:HGNC:7877]                       | -                                                     | 5246        | 6117 | 6525        | 5046 5125        |
| 4516                                        | 26.43706348                                           | 24.85207487 |      | 27.85307745 |                  |
| 22.4821933                                  | 20.57987262                                           | 19.42630415 |      |             |                  |
| ENSG00000279039                             | 4.627846703                                           | 4.634755704 |      | 21.51156516 | 0                |
| 0                                           | 0                                                     | 10.25805585 | 0    | 5.853184765 |                  |
| 0.004139611                                 | 1                                                     | AC011447.6  | 19   | 20207192    |                  |
| 20209789                                    | -                                                     | 2598        | TEC  | TEC         | - 4 5            |

|                                     |                                                        |             |                                     |             |             |             |       |
|-------------------------------------|--------------------------------------------------------|-------------|-------------------------------------|-------------|-------------|-------------|-------|
|                                     | 22                                                     | 0           | 0                                   | 0           | 0.084200672 | 0.084852534 |       |
|                                     | 0.392270808                                            | 0           | 0                                   | 0           | 0           |             |       |
| ENSG00000109606                     | 5191.287039                                            | 4916.548851 | 5122.685902                         |             |             |             |       |
| 3916.850488                         | 3946.046951                                            | 4196.658777 | 5076.840597                         |             |             |             |       |
| 4019.852072                         | 0.336742382                                            | 0.004180477 | 0.032211166                         |             |             |             | DHX15 |
| 4                                   | 24517441                                               | 24584550    | -                                   | 8162        |             |             |       |
| protein_coding                      | DEAH-box helicase 15 [Source:HGNC                      |             |                                     |             |             |             |       |
| Symbol;Acc:HGNC:2738]               | -                                                      | 4487        | 5304                                | 5239        | 3899        |             | 4318  |
| 4277                                | 30.06451428                                            | 28.65107245 | 29.73406345                         |             |             |             |       |
| 23.09712162                         | 23.05391276                                            | 24.46181603 |                                     |             |             |             |       |
| ENSG00000004799                     | 133.0505927                                            | 108.4532835 | 168.1813276                         |             |             |             |       |
| 51.23348932                         | 86.81668835                                            | 43.17348286 | 136.5617346                         |             |             |             |       |
| 60.40788684                         | 1.174467914                                            | 0.004193929 | 0.032298535                         |             |             |             | PKD4  |
| 7                                   | 95583499                                               | 95596491    | -                                   | 4519        |             |             |       |
| protein_coding                      | pyruvate dehydrogenase kinase 4 [Source:HGNC           |             |                                     |             |             |             |       |
| Symbol;Acc:HGNC:8812]               | -                                                      | 115         | 117                                 | 172         | 51          |             | 95    |
| 44                                  | 1.391714691                                            | 1.141504107 | 1.763147158                         |             |             |             |       |
| 0.54566871                          | 0.916093627                                            | 0.45452353  |                                     |             |             |             |       |
| ENSG00000153531                     | 18.51138681                                            | 41.71280134 | 39.11193665                         |             |             |             |       |
| 99.45324398                         | 66.71177105                                            | 102.046414  | 33.1120416                          |             |             |             |       |
| 89.40380969                         | -1.425369039                                           | 0.004199954 | 0.032309202                         |             |             |             |       |
| ADPRHL1 13                          | 113399610                                              | 113453524   | -                                   | 10924       |             |             |       |
| protein_coding                      | ADP-ribosylhydrolase like 1 [Source:HGNC               |             |                                     |             |             |             |       |
| Symbol;Acc:HGNC:21303]              | -                                                      | 16          | 45                                  | 40          | 99          |             | 73    |
| 104                                 | 0.08010009                                             | 0.181620464 | 0.169621444                         |             |             |             |       |
| 0.438182188                         | 0.29120563                                             | 0.444424184 |                                     |             |             |             |       |
| ENSG00000127220                     | 596.9922247                                            | 754.5382286 | 831.1286537                         |             |             |             |       |
| 1045.765929                         | 955.8974318                                            | 1113.679615 | 727.5530357                         |             |             |             |       |
| 1038.447659                         | -0.512232716                                           | 0.004201494 | 0.032309202                         |             |             |             | ABHD8 |
| 19                                  | 17292131                                               | 17310236    | -                                   | 2210        |             |             |       |
| protein_coding                      | abhydrolase domain containing 8 [Source:HGNC           |             |                                     |             |             |             |       |
| Symbol;Acc:HGNC:23759]              | -                                                      | 516         | 814                                 | 850         | 1041        |             | 1046  |
| 1135                                | 12.76886045                                            | 16.23925454 | 17.8167755                          |             |             |             |       |
| 22.77506747                         | 20.6251924                                             | 23.9745036  |                                     |             |             |             |       |
| ENSG00000196449                     | 1058.619933                                            | 1322.759278 | 964.1092383                         |             |             |             |       |
| 1292.892172                         | 2015.97489                                             | 1582.700633 | 1115.162817                         |             |             |             |       |
| 1630.522565                         | -0.548012314                                           | 0.004201655 | 0.032309202                         |             |             |             | YRDC  |
| 1                                   | 37802944                                               | 37808185    | -                                   | 1826        |             |             |       |
| protein_coding                      | yrdC N6-threonylcarbamoyltransferase domain containing |             |                                     |             |             |             |       |
| [Source:HGNC Symbol;Acc:HGNC:28905] | -                                                      |             | 915                                 | 1427        |             |             | 986   |
| 1287                                | 2206                                                   | 1613        | 27.40406782                         | 34.45538904 |             |             |       |
| 25.01373805                         | 34.07838383                                            | 52.64575189 | 41.23629426                         |             |             |             |       |
| ENSG00000251191                     | 17.35442514                                            | 5.561706845 | 6.844588913                         |             |             |             | 0     |
| 0                                   | 0                                                      | 9.920240298 | 0                                   | 5.799502836 |             |             |       |
| 0.004204752                         | 1                                                      | LINC00589   | 8                                   | 29673922    |             |             |       |
| 29748109                            | -                                                      | 2074        | lincRNA long intergenic non-protein |             |             |             |       |
| coding RNA 589                      | [Source:HGNC Symbol;Acc:HGNC:32299]                    |             |                                     |             |             | -           | 15    |
| 6                                   | 7                                                      | 0           | 0                                   | 0           | 0.395527988 |             |       |
| 0.127548823                         | 0.156347789                                            | 0           | 0                                   | 0           |             |             |       |
| ENSG00000135597                     | 1151.176867                                            | 1237.479773 | 1019.843748                         |             |             |             |       |

|                                     |                                       |                 |                           |        |
|-------------------------------------|---------------------------------------|-----------------|---------------------------|--------|
| 1694.723461                         | 1454.864925                           | 1475.748141     | 1136.166796               |        |
| 1541.778842                         | -0.44025411                           | 0.004208942     | 0.032348971               | REPS1  |
| 6                                   | 138903493                             | 138988261       | - 9602                    |        |
| protein_coding                      | RALBP1 associated                     | Eps domain      | containing 1 [Source:HGNC |        |
| Symbol;Acc:HGNC:15578]              | -                                     | 995 1335        | 1043 1687                 | 1592   |
| 1504                                | 5.66703757                            | 6.129901868     | 5.031819602               |        |
| 8.494828148                         | 7.225035071                           | 7.311932448     |                           |        |
| ENSG00000164610                     | 549.556796                            | 619.2033621     | 560.2784925               |        |
| 782.566435                          | 826.1293292                           | 805.5779415     | 576.3462168               |        |
| 804.7579019                         | -0.481203788                          | 0.004212562     | 0.032360524               | RP9    |
| 7                                   | 33094797                              | 33109401        | - 1898                    |        |
| protein_coding                      | "RP9, pre-mRNA                        | splicing factor | [Source:HGNC              |        |
| Symbol;Acc:HGNC:10288]"             | -                                     | 475 668         | 573 779                   | 904    |
| 821                                 | 13.68649094                           | 15.51723053     | 13.98494844               |        |
| 19.84460533                         | 20.75538626                           | 20.19263452     |                           |        |
| ENSG00000132661                     | 495.1795972                           | 668.3317726     | 500.6327891               |        |
| 760.4657141                         | 821.5600298                           | 836.9768381     | 554.7147196               |        |
| 806.334194                          | -0.53870201                           | 0.004221209     | 0.032410656               | NXT1   |
| 20                                  | 23350736                              | 23354777        | + 1123                    |        |
| protein_coding                      | nuclear transport factor 2 like       | export factor 1 |                           |        |
| [Source:HGNC Symbol;Acc:HGNC:15913] | -                                     | 428 721         |                           | 512    |
| 757                                 | 899 853                               | 20.84292787     | 28.30671462               |        |
| 21.11993905                         | 32.5924749                            | 34.88498441     | 35.45808777               |        |
| ENSG00000152465                     | 599.306148                            | 558.9515379     | 601.3460259               |        |
| 476.1700772                         | 365.543951                            | 308.1016731     | 586.5345706               |        |
| 383.2719004                         | 0.614017875                           | 0.004232166     | 0.032478478               | NMT2   |
| 10                                  | 15102584                              | 15168693        | - 4700                    |        |
| protein_coding                      | N-myristoyltransferase 2 [Source:HGNC |                 |                           |        |
| Symbol;Acc:HGNC:7858]               | -                                     | 518 603         | 615 474                   | 400    |
| 314                                 | 6.027352824                           | 5.656573208     | 6.061494475               |        |
| 4.876202134                         | 3.70869169                            | 3.118730345     |                           |        |
| ENSG00000198804                     | 122005.0796                           | 109268.0735     | 137942.9116               |        |
| 166903.6395                         | 153453.5229                           | 151958.8851     | 123072.0216               |        |
| 157438.6825                         | -0.355287956                          | 0.004239386     | 0.03250504                | MT-C01 |
| MT                                  | 5904 7445                             | + 1542          | protein_coding            |        |
| mitochondrially                     | encoded cytochrome c oxidase I        | [Source:HGNC    |                           |        |
| Symbol;Acc:HGNC:7419]               | -                                     | 105453 117879   | 141075 166143             | 167918 |
| 154868                              | 3739.979988                           | 3370.435552     | 4238.07015                |        |
| 5209.534169                         | 4745.38526                            | 4688.385908     |                           |        |
| ENSG00000105619                     | 216.3518334                           | 284.5740002     | 254.2275882               |        |
| 329.5016568                         | 384.7350084                           | 534.7624581     | 251.7178073               |        |
| 416.3330411                         | -0.724641774                          | 0.00423988      | 0.03250504                | TFPT   |
| 19                                  | 54107013                              | 54115675        | - 1240                    |        |
| protein_coding                      | TCF3 fusion partner [Source:HGNC      |                 |                           |        |
| Symbol;Acc:HGNC:13630]              | -                                     | 187 307         | 260 328                   | 421    |
| 545                                 | 8.247353962                           | 10.9156763      | 9.713016324               |        |
| 12.78949437                         | 14.79513759                           | 20.51733044     |                           |        |
| ENSG00000143393                     | 2008.485469                           | 2220.974933     | 2149.200919               |        |
| 2824.87396                          | 2938.973366                           | 2539.385764     | 2126.22044                |        |
| 2767.744363                         | -0.380255518                          | 0.004251557     | 0.032568263               | PI4KB  |



|                                     |                                                 |             |             |             |           |
|-------------------------------------|-------------------------------------------------|-------------|-------------|-------------|-----------|
| 1                                   | 151291797                                       | 151327715   | -           | 5456        |           |
| protein_coding                      | phosphatidylinositol 4-kinase beta [Source:HGNC |             |             |             |           |
| Symbol;Acc:HGNC:8984]               | -                                               | 1736        | 2396        | 2198        | 2812 3216 |
| 2588                                | 17.40083432                                     | 19.36183033 |             | 18.66189675 |           |
| 24.91966336                         | 25.68622463                                     | 22.1429738  |             |             |           |
| ENSG00000230630                     | 183.9569064                                     | 145.5313291 |             | 172.0925212 |           |
| 84.38457065                         | 93.2137075                                      | 87.32818123 |             | 167.1935856 |           |
| 88.30881979                         | 0.919573601                                     | 0.004252388 |             | 0.032568263 | DNM30S    |
| 1                                   | 172138397                                       | 172144840   | -           | 3195        |           |
| antisense                           | DNM3 opposite strand/antisense RNA [Source:HGNC |             |             |             |           |
| Symbol;Acc:HGNC:41228]              | -                                               | 159         | 157         | 176         | 84 102    |
| 89                                  | 2.721579184                                     | 2.166520226 |             | 2.551786063 |           |
| 1.271187577                         | 1.391194676                                     | 1.300364725 |             |             |           |
| ENSG00000106635                     | 1251.832533                                     | 1407.111832 |             | 1290.693909 |           |
| 1872.533806                         | 1643.12006                                      | 1724.976883 |             | 1316.546091 |           |
| 1746.876916                         | -0.407608712                                    | 0.004263492 |             | 0.032636955 | BCL7B     |
| 7                                   | 73536356                                        | 73558002    | -           | 3542        |           |
| protein_coding                      | BCL tumor suppressor 7B [Source:HGNC            |             |             |             |           |
| Symbol;Acc:HGNC:1005]               | -                                               | 1082        | 1518        | 1320        | 1864 1798 |
| 1758                                | 16.70603614                                     | 18.89544711 |             | 17.2634595  |           |
| 25.44477223                         | 22.12074392                                     | 23.16948335 |             |             |           |
| ENSG00000006625                     | 636.3289216                                     | 849.087245  |             | 705.9704565 |           |
| 347.5840648                         | 444.1359004                                     | 604.42876   |             | 730.4622077 |           |
| 465.3829084                         | 0.650870068                                     | 0.004269162 |             | 0.032650149 | GGCT      |
| 7                                   | 30496621                                        | 30504844    | -           | 1597        |           |
| protein_coding                      | gamma-glutamylcyclotransferase [Source:HGNC     |             |             |             |           |
| Symbol;Acc:HGNC:21705]              | -                                               | 550         | 916         | 722         | 346 486   |
| 616                                 | 18.8344302                                      | 25.28858419 |             | 20.94279961 |           |
| 10.47544303                         | 13.26141759                                     | 18.00619014 |             |             |           |
| ENSG00000197046                     | 6135.367766                                     | 6906.71295  |             | 6761.476048 |           |
| 7587.579311                         | 8970.448557                                     | 8843.695477 |             | 6601.185588 |           |
| 8467.241115                         | -0.35910332                                     | 0.004270317 |             | 0.032650149 |           |
| SIGLEC15                            | 18                                              | 45825512    | 45844080    | +           | 3598      |
| protein_coding                      | sialic acid binding Ig like lectin 15           |             |             |             |           |
| [Source:HGNC Symbol;Acc:HGNC:27596] | -                                               |             |             | 5303        | 7451 6915 |
| 7553                                | 9816                                            | 9013        | 80.60373766 | 91.30348663 |           |
| 89.02940712                         | 101.4984809                                     | 118.8863486 |             | 116.9376193 |           |
| ENSG00000078018                     | 193.2125998                                     | 74.15609127 |             | 171.1147228 |           |
| 52.23806755                         | 8.224738897                                     | 76.53481052 |             | 146.161138  |           |
| 45.66587232                         | 1.679665635                                     | 0.004271623 |             | 0.032650149 | MAP2      |
| 2                                   | 209424058                                       | 209734118   | +           | 11559       |           |
| protein_coding                      | microtubule associated protein 2 [Source:HGNC   |             |             |             |           |
| Symbol;Acc:HGNC:6839]               | -                                               | 167         | 80          | 175         | 52 9      |
| 78                                  | 0.790116116                                     | 0.305143189 |             | 0.701326486 |           |
| 0.217512538                         | 0.033929764                                     | 0.315007123 |             |             |           |
| ENSG00000139112                     | 171.230328                                      | 190.0249839 |             | 149.6031577 |           |
| 275.2544328                         | 291.5213009                                     | 277.683992  |             | 170.2861565 |           |
| 281.4865752                         | -0.724919112                                    | 0.004276347 |             | 0.032655686 |           |
| GABARAPL1                           | 12                                              | 10212458    | 10223130    | +           | 4086      |
| protein_coding                      | GABA type A receptor associated protein like 1  |             |             |             |           |

|                                               |                                                   |              |                          |                        |
|-----------------------------------------------|---------------------------------------------------|--------------|--------------------------|------------------------|
| [Source:HGNC Symbol;Acc:HGNC:4068]            | -                                                 | 148          | 205                      | 153                    |
| 274                                           | 319                                               | 283          | 1.980879538              | 2.212022075            |
| 1.734584752                                   | 3.242301648                                       | 3.402130109  | 3.233211457              |                        |
| ENSG00000172244                               | 297.3391507                                       | 192.8058373  | 274.7613549              |                        |
| 161.7370937                                   | 138.9067014                                       | 131.4828796  | 254.968781               |                        |
| 144.0422249                                   | 0.822754954                                       | 0.00427662   | 0.032655686              |                        |
| C5orf34 5                                     | 43486701                                          | 43515145     | -                        | 3011                   |
| protein_coding                                | chromosome 5 open reading frame                   | 34           | [Source:HGNC             |                        |
| Symbol;Acc:HGNC:24738]                        | -                                                 | 257          | 208                      | 281 161 152            |
| 134                                           | 4.66785203                                        | 3.045695891  | 4.323127261              |                        |
| 2.585332091                                   | 2.1998417                                         | 2.077495438  |                          |                        |
| ENSG00000224592                               | 11.56961676                                       | 1.853902282  | 17.60037149              | 0                      |
| 0                                             | 0                                                 | 10.34129684  | 0                        | 5.861840273            |
| 0.004285944                                   | 1                                                 | AL139158.2   | 1                        | 38047314               |
| 38119025                                      | +                                                 | 684          | lincRNA novel transcript | -                      |
| 10                                            | 2                                                 | 18           | 0                        | 0 0.799537082          |
| 0.128916306                                   | 1.219042535                                       | 0            | 0                        | 0                      |
| ENSG00000069849                               | 3875.821614                                       | 3669.799567  | 4017.773692              |                        |
| 3198.577059                                   | 2321.204089                                       | 3085.922809  | 3854.464957              |                        |
| 2868.567985                                   | 0.426334836                                       | 0.004311908  | 0.032908703              | ATP1B3                 |
| 3                                             | 141876124                                         | 141926514    | +                        | 2584                   |
| protein_coding                                | ATPase Na+/K+ transporting subunit beta 3         | [Source:HGNC |                          |                        |
| Symbol;Acc:HGNC:806]                          | -                                                 | 3350         | 3959                     | 4109 3184 2540         |
| 3145                                          | 70.90012657                                       | 67.5502484   | 73.66243786              |                        |
| 59.57743016                                   | 42.83510197                                       | 56.81646068  |                          |                        |
| ENSG00000259298                               | 4.627846703                                       | 12.97731597  | 11.73358099              | 0                      |
| 0                                             | 0                                                 | 9.779581223  | 0                        | 5.785374154            |
| 0.004325105                                   | 1                                                 | AC012170.2   | 15                       | 50497195               |
| 50498744                                      | -                                                 | 667          | antisense                | "novel transcript,     |
| antisense to USP8"                            | -                                                 | 4            | 14                       | 12 0 0                 |
| 0                                             | 0.327966036                                       | 0.925414201  | 0.833408389              | 0                      |
| 0                                             | 0                                                 |              |                          |                        |
| ENSG00000197903                               | 258.0024537                                       | 212.2718113  | 236.6272167              |                        |
| 403.8404453                                   | 297.91832                                         | 447.4342769  | 235.6338272              |                        |
| 383.0643474                                   | -0.701570028                                      | 0.004336805  | 0.033082202              |                        |
| HIST1H2BK                                     | 6                                                 | 27146418     | 27146798                 | - 381                  |
| protein_coding                                | histone cluster 1 H2B family member k             |              |                          |                        |
| [Source:HGNC Symbol;Acc:HGNC:13954]           | -                                                 | 223          | 229                      | 242                    |
| 402                                           | 326                                               | 456          | 32.00918379              | 26.49991401            |
| 29.42339934                                   | 51.0155172                                        | 37.28646592  | 55.8709303               |                        |
| ENSG00000135439                               | 167.759443                                        | 232.6647364  | 254.2275882              |                        |
| 306.3963577                                   | 395.7013269                                       | 382.6740526  | 218.2172558              |                        |
| 361.5905791                                   | -0.726834188                                      | 0.004339037  | 0.033082722              | AGAP2                  |
| 12                                            | 57723761                                          | 57742157     | -                        | 6728                   |
| protein_coding                                | "ArfGAP with GTPase domain, ankyrin repeat and PH |              |                          |                        |
| domain 2 [Source:HGNC Symbol;Acc:HGNC:16921]" | -                                                 | 145          | 251                      |                        |
| 260                                           | 305                                               | 433          | 390                      | 1.17862794 1.644832569 |
| 1.790151641                                   | 2.191871416                                       | 2.804532721  | 2.705980484              |                        |
| ENSG00000182534                               | 2703.819436                                       | 2706.697331  | 2487.519171              |                        |
| 1634.448767                                   | 2256.320037                                       | 1960.468608  | 2632.678646              |                        |

|                                        |                                     |                |                             |              |
|----------------------------------------|-------------------------------------|----------------|-----------------------------|--------------|
| 1950.412471                            | 0.432501792                         | 0.004354628    | 0.033185041                 | MXRA7        |
| 17                                     | 76672551                            | 76711016       | - 9257                      |              |
| protein_coding                         | matrix remodeling associated 7      | [Source:HGNC   |                             |              |
| Symbol;Acc:HGNC:7541]                  | -                                   | 2337 2920      | 2544 1627                   | 2469         |
| 1998                                   | 13.80648614                         | 13.90741921    | 12.7306125                  |              |
| 8.498034809                            | 11.62276412                         | 10.07560785    |                             |              |
| ENSG00000121073                        | 1486.695753                         | 1378.376346    | 1349.361814                 |              |
| 1023.665208                            | 1123.133789                         | 1004.764692    | 1404.811305                 |              |
| 1050.52123                             | 0.418865496                         | 0.004361528    | 0.033194992                 |              |
| SLC35B1 17                             | 49700934                            | 49709014       | - 5928                      |              |
| protein_coding                         | solute carrier family 35 member B1  | [Source:HGNC   |                             |              |
| Symbol;Acc:HGNC:20798]                 | -                                   | 1285 1487      | 1380 1019                   | 1229         |
| 1024                                   | 11.85467482                         | 11.05953154    | 10.78383781                 |              |
| 8.31126645                             | 9.034461794                         | 8.063763788    |                             |              |
| ENSG00000184060                        | 23.13923351                         | 25.0276808     | 23.46716199                 |              |
| 69.31589732                            | 62.14247166                         | 67.70387084    | 23.87802544                 |              |
| 66.38741328                            | -1.474235722                        | 0.004361643    | 0.033194992                 | ADAP2        |
| 17                                     | 30906344                            | 30959322       | + 3750                      |              |
| protein_coding                         | ArfGAP with dual PH domains 2       | [Source:HGNC   |                             |              |
| Symbol;Acc:HGNC:16487]                 | -                                   | 20 27          | 24 69                       | 68           |
| 69                                     | 0.291671128                         | 0.317443511    | 0.296471144                 |              |
| 0.889649706                            | 0.790198576                         | 0.858942039    |                             |              |
| ENSG00000267751                        | 1.156961676                         | 7.415609127    | 2.933395248                 |              |
| 39.17855066                            | 18.27719755                         | 25.51160351    | 3.835322017                 |              |
| 27.6557839                             | -2.823763495                        | 0.004362448    | 0.033194992                 |              |
| AC009005.1                             | 19 567210                           | 572228 -       | 865 antisense               |              |
| uncharacterized LOC105372233           | [Source:NCBI gene;Acc:105372233]    |                |                             |              |
| -                                      | 1 8                                 | 3 39           | 20 26                       |              |
| 0.06322351                             | 0.40776302                          | 0.160659941    | 2.179965979                 |              |
| 1.007563638                            | 1.403147337                         |                |                             |              |
| ENSG00000115806                        | 2538.373917                         | 2213.559324    | 2071.954844                 |              |
| 3297.025725                            | 2831.1379                           | 2885.754843    | 2274.629362                 |              |
| 3004.639489                            | -0.401816031                        | 0.004366149    | 0.033206626                 |              |
| GORASP2 2                              | 170928464                           | 170967129      | + 5340                      |              |
| protein_coding                         | golgi reassembly stacking protein 2 | [Source:HGNC   |                             |              |
| Symbol;Acc:HGNC:17500]                 | -                                   | 2194 2388      | 2119 3282                   | 3098         |
| 2941                                   | 22.46932774                         | 19.7163729     | 18.38197434                 |              |
| 29.71656016                            | 25.28126227                         | 25.70986542    |                             |              |
| ENSG00000092345                        | 16.19746346                         | 14.83121825    | 0.977798416                 | 0            |
| 0                                      | 0                                   | 10.66882671    | 0                           | 5.906709332  |
| 0.004381681                            | 1                                   | DAZL 3         | 16586792                    | 16670306     |
| -                                      | 3631                                | protein_coding | deleted in azoospermia like |              |
| [Source:HGNC Symbol;Acc:HGNC:2685]     | -                                   | 14             | 16                          | 1            |
| 0                                      | 0                                   | 0              | 0.210861115                 | 0.19427982   |
| 0.012757812                            | 0                                   | 0              | 0                           |              |
| ENSG00000250548                        | 6.941770054                         | 19.46597396    | 21.51156516                 | 0            |
| 0                                      | 1.962431039                         | 15.97310306    | 0.65414368                  |              |
| 4.625884758                            | 0.004396626                         | 1              | LINC01303                   | 14           |
| 61556313                               | 61570653                            | -              | 5148                        | lincRNA long |
| intergenic non-protein coding RNA 1303 | [Source:HGNC                        |                |                             |              |

|                                                             |                                                 |                |             |                       |                |             |
|-------------------------------------------------------------|-------------------------------------------------|----------------|-------------|-----------------------|----------------|-------------|
| Symbol;Acc:HGNC:50470]                                      | -                                               | 6              | 21          | 22                    | 0              | 0           |
| 2                                                           | 0.06373932                                      | 0.179851769    |             | 0.197964172           |                | 0           |
| 0                                                           | 0.018135832                                     |                |             |                       |                |             |
| ENSG00000184557                                             | 659.4681552                                     | 1106.779662    |             | 1351.317411           |                |             |
| 535.4401923                                                 | 563.8515444                                     | 813.4276656    |             | 1039.188409           |                |             |
| 637.5731341                                                 | 0.705584946                                     | 0.004401548    |             | 0.03345921            |                | SOCS3       |
| 17                                                          | 78356778                                        | 78360077       |             | -                     | 2734           |             |
| protein_coding                                              | suppressor of cytokine signaling 3 [Source:HGNC |                |             |                       |                |             |
| Symbol;Acc:HGNC:19391]                                      | -                                               | 570            | 1194        | 1382                  | 533            | 617         |
| 829                                                         | 11.40173803                                     | 19.25483381    |             | 23.41596114           |                |             |
| 9.426053823                                                 | 9.834340738                                     | 14.1547452     |             |                       |                |             |
| ENSG00000171476                                             | 5.784808379                                     | 4.634755704    |             | 19.55596832           |                | 0           |
| 0                                                           | 0                                               | 9.991844135    | 0           | 5.814772251           |                |             |
| 0.004402414                                                 | 1                                               | HOPX           | 4           | 56647988              | 56681899       |             |
| -                                                           | 7753                                            | protein_coding | HOP         | homeobox [Source:HGNC |                |             |
| Symbol;Acc:HGNC:24961]                                      | -                                               | 5              | 5           | 20                    | 0              | 0           |
| 0                                                           | 0.035269145                                     | 0.028433752    |             | 0.119498559           |                | 0           |
| 0                                                           | 0                                               |                |             |                       |                |             |
| ENSG00000174744                                             | 1517.933719                                     | 1852.048379    |             | 1819.682852           |                |             |
| 2476.285317                                                 | 2270.027936                                     | 2157.692927    |             | 1729.888317           |                |             |
| 2301.335393                                                 | -0.411286639                                    | 0.004409619    |             | 0.0335039             |                | BRMS1       |
| 11                                                          | 66337333                                        | 66345125       |             | -                     | 2514           |             |
| protein_coding                                              | "BRMS1, transcriptional repressor and anoikis   |                |             |                       |                |             |
| regulator [Source:HGNC Symbol;Acc:HGNC:17262]"              | -                                               |                |             | 1312                  | 1998           |             |
| 1861                                                        | 2465                                            | 2484           | 2199        | 28.54061153           | 35.04000573    |             |
| 34.29126888                                                 | 47.40813455                                     | 43.0571139     |             | 40.83250198           |                |             |
| ENSG00000197774                                             | 98.34174244                                     | 164.9973031    |             | 228.8048294           |                |             |
| 474.1609208                                                 | 195.5660138                                     | 330.6696301    |             | 164.0479583           |                |             |
| 333.4655215                                                 | -1.020599845                                    | 0.004414403    |             | 0.033523583           |                | EME2        |
| 16                                                          | 1773207                                         | 1781708        | +           | 6909                  | protein_coding |             |
| essential meiotic structure-specific endonuclease subunit 2 | [Source:HGNC Symbol;Acc:HGNC:27289]             |                |             |                       |                |             |
|                                                             | -                                               |                |             | 85                    | 178            | 234         |
| 472                                                         | 214                                             | 337            | 0.672819308 | 1.135896516           |                |             |
| 1.568928386                                                 | 3.30314792                                      | 1.349761941    |             | 2.276988011           |                |             |
| ENSG00000145555                                             | 4156.963301                                     | 4122.151723    |             | 5695.675774           |                |             |
| 3342.231745                                                 | 3200.337291                                     | 3753.149362    |             | 4658.263599           |                |             |
| 3431.906132                                                 | 0.440893988                                     | 0.004424666    |             | 0.033584838           |                | MYO10       |
| 5                                                           | 16661914                                        | 16936276       |             | -                     | 13963          |             |
| protein_coding                                              | myosin X [Source:HGNC Symbol;Acc:HGNC:7593]     |                |             |                       |                | -           |
| 3593                                                        | 4447                                            | 5825           | 3327        | 3502                  | 3825           | 14.07256269 |
| 14.04178598                                                 | 19.32500645                                     | 11.52060481    |             | 10.92939196           |                |             |
| 12.78788545                                                 |                                                 |                |             |                       |                |             |
| ENSG00000214655                                             | 939.4528807                                     | 1268.069161    |             | 1060.911282           |                |             |
| 1792.167548                                                 | 1218.175217                                     | 1712.221081    |             | 1089.477774           |                |             |
| 1574.187949                                                 | -0.530166447                                    | 0.004432564    |             | 0.033628093           |                | ZSWIM8      |
| 10                                                          | 73785582                                        | 73801797       |             | +                     | 7953           |             |
| protein_coding                                              | zinc finger SWIM-type containing 8 [Source:HGNC |                |             |                       |                |             |
| Symbol;Acc:HGNC:23528]                                      | -                                               | 812            | 1368        | 1085                  | 1784           | 1333        |
| 1745                                                        | 5.58367021                                      | 7.583838446    |             | 6.319769106           |                |             |
| 10.84588722                                                 | 7.303949549                                     | 10.24260641    |             |                       |                |             |

|                        |                                                |             |             |        |
|------------------------|------------------------------------------------|-------------|-------------|--------|
| ENSG00000151612        | 473.1973254                                    | 319.7981436 | 458.5874572 |        |
| 320.4604528            | 198.3075934                                    | 224.698354  | 417.1943087 |        |
| 247.8221334            | 0.751352057                                    | 0.004452648 | 0.033763705 | ZNF827 |
| 4                      | 145757627                                      | 145938635   | - 8433      |        |
| protein_coding         | zinc finger protein 827 [Source:HGNC           |             |             |        |
| Symbol;Acc:HGNC:27193] | zf-C2H2                                        | 409 345     | 469 319     | 217    |
| 229                    | 2.652381074                                    | 1.803727608 | 2.576280808 |        |
| 1.828983549            | 1.121337203                                    | 1.267650167 |             |        |
| ENSG00000213347        | 163.1315963                                    | 168.7051076 | 393.0749633 |        |
| 138.6317946            | 39.29597473                                    | 121.6707244 | 241.6372224 |        |
| 99.86616459            | 1.276997521                                    | 0.004456181 | 0.033773746 | MXD3   |
| 5                      | 177301461                                      | 177312757   | - 5154      |        |
| protein_coding         | MAX dimerization protein 3 [Source:HGNC        |             |             |        |
| Symbol;Acc:HGNC:14008] | bHLH                                           | 141 182     | 402 138     | 43     |
| 124                    | 1.496130275                                    | 1.556900764 | 3.613134218 |        |
| 1.294600853            | 0.363565479                                    | 1.123112619 |             |        |
| ENSG00000164096        | 1659.083043                                    | 1662.023396 | 1347.406217 |        |
| 1723.856229            | 2588.051173                                    | 2263.664203 | 1556.170885 |        |
| 2191.857202            | -0.494444926                                   | 0.004460031 | 0.033786172 | C4orf3 |
| 4                      | 119296419                                      | 119304445   | - 3148      |        |
| protein_coding         | chromosome 4 open reading frame 3 [Source:HGNC |             |             |        |
| Symbol;Acc:HGNC:19225] | -                                              | 1434 1793   | 1378 1716   | 2832   |
| 2307                   | 24.91203127                                    | 25.11189714 | 20.27761858 |        |
| 26.35625959            | 39.20280326                                    | 34.21045944 |             |        |
| ENSG00000171475        | 1517.933719                                    | 1561.912672 | 1484.297996 |        |
| 2017.19307             | 1843.255373                                    | 2116.481875 | 1521.381462 |        |
| 1992.310106            | -0.388923002                                   | 0.004463572 | 0.033796247 | WIPF2  |
| 17                     | 40219304                                       | 40284136    | + 8123      |        |
| protein_coding         | WAS/WASL interacting protein family member 2   |             |             |        |
| [Source:HGNC           | Symbol;Acc:HGNC:30923]                         | -           | 1312 1685   | 1518   |
| 2008                   | 2017 2157                                      | 8.833078591 | 9.145709656 |        |
| 8.656807776            | 11.95221706                                    | 10.82051777 | 12.39594749 |        |
| ENSG00000058600        | 1435.78944                                     | 1686.124125 | 1525.365529 |        |
| 2034.2709              | 1956.573998                                    | 2122.369169 | 1549.093031 |        |
| 2037.738022            | -0.395110563                                   | 0.004471341 | 0.033838314 | POLR3E |
| 16                     | 22297375                                       | 22335103    | + 9488      |        |
| protein_coding         | RNA polymerase III subunit E [Source:HGNC      |             |             |        |
| Symbol;Acc:HGNC:30347] | -                                              | 1241 1819   | 1560 2025   | 2141   |
| 2163                   | 7.153059181                                    | 8.452632377 | 7.61644619  |        |
| 10.31933159            | 9.833329433                                    | 10.64211332 |             |        |
| ENSG00000118263        | 802.9314029                                    | 769.3694469 | 593.5236386 |        |
| 1121.109296            | 1038.144821                                    | 927.2486659 | 721.9414962 |        |
| 1028.834261            | -0.511496595                                   | 0.004487022 | 0.033940183 | KLF7   |
| 2                      | 207074137                                      | 207167267   | - 9262      |        |
| protein_coding         | Kruppel like factor 7 [Source:HGNC             |             |             |        |
| Symbol;Acc:HGNC:6350]  | zf-C2H2                                        | 694 830     | 607 1116    | 1136   |
| 945                    | 4.097787247                                    | 3.95100222  | 3.035892367 |        |
| 5.825867921            | 5.344808537                                    | 4.762917595 |             |        |
| ENSG00000240527        | 84.45820233                                    | 86.2064561  | 66.4902923  |        |
| 146.6684204            | 189.1689946                                    | 133.4453106 | 79.05165024 |        |

|                                                   |                                                  |                                              |             |                         |
|---------------------------------------------------|--------------------------------------------------|----------------------------------------------|-------------|-------------------------|
| 156.4275752                                       | -0.985701384                                     | 0.004507285                                  | 0.034076592 |                         |
| AL365273.1                                        | 10                                               | 95833508                                     | 95873758    | + 587                   |
|                                                   | sense_intronic                                   | "novel transcript, sense intronic to ENTPD1" |             |                         |
| -                                                 | 73                                               | 93                                           | 68          | 146 207 136             |
| 6.801104871                                       | 6.985199356                                      | 5.366279232                                  | 12.02585522 |                         |
| 15.36706195                                       | 10.81550601                                      |                                              |             |                         |
| ENSG00000132406                                   | 429.2327817                                      | 335.556313                                   | 339.2960504 |                         |
| 221.0072088                                       | 222.9818101                                      | 252.1723885                                  | 368.0283817 |                         |
| 232.0538025                                       | 0.664285124                                      | 0.004528965                                  | 0.034223574 |                         |
| TMEM128 4                                         | 4235542                                          | 4248212                                      | - 1737      | protein_coding          |
| transmembrane protein 128                         | [Source:HGNC Symbol;Acc:HGNC:28201]              |                                              |             | -                       |
|                                                   | 371                                              | 362                                          | 347         | 220 244 257 11.68069822 |
|                                                   | 9.188459598                                      | 9.254055763                                  | 6.123843436 | 6.121369646             |
|                                                   | 6.906839129                                      |                                              |             |                         |
| ENSG00000134321                                   | 5.784808379                                      | 36.15109449                                  | 10.75578258 |                         |
| 60.27469332                                       | 152.6145995                                      | 22.56795695                                  | 17.56389515 |                         |
| 78.48574993                                       | -2.150133516                                     | 0.004532703                                  | 0.034234893 | RSAD2                   |
|                                                   | 2                                                | 6865806                                      | 6898239     | + 4834 protein_coding   |
| radical S-adenosyl methionine domain containing 2 | [Source:HGNC Symbol;Acc:HGNC:30908]              |                                              |             | -                       |
|                                                   | 23                                               | 0.056566339                                  | 0.355706596 | 0.105411622             |
| 0.600130668                                       | 1.505457234                                      | 0.222109547                                  |             |                         |
| ENSG00000152894                                   | 4052.83675                                       | 2766.022204                                  | 3621.765333 |                         |
| 2726.425295                                       | 2496.665185                                      | 2436.358135                                  | 3480.208096 |                         |
| 2553.149538                                       | 0.446618042                                      | 0.004537984                                  | 0.034257861 | PTPRK                   |
|                                                   | 6                                                | 127968779                                    | 128520674   | - 9000                  |
| protein_coding                                    | "protein tyrosine phosphatase, receptor type K   |                                              |             |                         |
| [Source:HGNC Symbol;Acc:HGNC:9674]"               |                                                  |                                              |             | - 3503 2984 3704        |
|                                                   | 2714                                             | 2732                                         | 2483        | 21.28591584 14.61807775 |
| 19.06474165                                       | 14.58037018                                      | 13.2280791                                   | 12.87894374 |                         |
| ENSG00000254122                                   | 62.47593049                                      | 27.80853423                                  | 42.04533189 |                         |
| 1.004578222                                       | 5.483159264                                      | 17.66187935                                  | 44.1099322  |                         |
| 8.049872279                                       | 2.4521286                                        | 0.004543134                                  | 0.034269055 |                         |
| PCDHGB7 5                                         | 141417645                                        | 141512979                                    | + 4966      |                         |
| protein_coding                                    | "protocadherin gamma subfamily B, 7 [Source:HGNC |                                              |             |                         |
| Symbol;Acc:HGNC:8714]"                            |                                                  |                                              |             | - 54 30 43 1 6          |
|                                                   | 18                                               | 0.594677843                                  | 0.266347422 | 0.401110653             |
| 0.009736312                                       | 0.052650577                                      | 0.169204468                                  |             |                         |
| ENSG00000004975                                   | 1299.267962                                      | 1841.851917                                  | 1698.435849 |                         |
| 2061.394512                                       | 2250.836878                                      | 2325.480781                                  | 1613.185243 |                         |
| 2212.570724                                       | -0.455172986                                     | 0.004543951                                  | 0.034269055 | DVL2                    |
|                                                   | 17                                               | 7225341                                      | 7234545     | - 5350 protein_coding   |
| dishevelled segment polarity protein 2            | [Source:HGNC Symbol;Acc:HGNC:3086]               |                                              |             | -                       |
|                                                   | 2370                                             | 11.47943959                                  | 16.37487687 | 1737 2052 2463          |
| 18.5449126                                        | 20.0617691                                       | 20.67952695                                  |             |                         |
| ENSG00000133935                                   | 592.364378                                       | 717.460183                                   | 709.8816501 |                         |
| 380.7351461                                       | 524.5555696                                      | 458.2276476                                  | 673.2354037 |                         |
| 454.5061211                                       | 0.56691656                                       | 0.004548117                                  | 0.034283563 | ERG28                   |
|                                                   | 14                                               | 75649791                                     | 75661189    | - 2633                  |

|                                    |                                       |                |                      |                            |              |      |   |
|------------------------------------|---------------------------------------|----------------|----------------------|----------------------------|--------------|------|---|
| protein_coding                     | ergosterol biosynthesis 28 homolog    | [Source:HGNC   |                      |                            |              |      |   |
| Symbol;Acc:HGNC:1187]              | -                                     | 512            | 774                  | 726                        | 379          | 574  |   |
| 467                                | 10.63442015                           | 12.96056873    | 12.77286192          |                            |              |      |   |
| 6.95968474                         | 9.499913065                           | 8.279651501    |                      |                            |              |      |   |
| ENSG00000135898                    | 0                                     | 0              | 0                    | 17.07782977                | 9.138598774  |      |   |
|                                    | 3.924862078                           | 0              | 10.04709688          | -5.747998498               |              |      |   |
| 0.004554614                        | 1                                     | GPR55          | 2                    | 230907318                  | 230961066    |      |   |
| -                                  | 4130                                  | protein_coding |                      | G protein-coupled receptor | 55           |      |   |
| [Source:HGNC Symbol;Acc:HGNC:4511] | -                                     | 0              | 0                    | 0                          | 0            |      |   |
| 17                                 | 10                                    | 4              | 0                    | 0                          | 0.199021542  |      |   |
| 0.105513626                        | 0.045212235                           |                |                      |                            |              |      |   |
| ENSG00000135744                    | 20.82531016                           | 2.780853423    |                      | 6.844588913                | 0            |      |   |
|                                    | 0                                     | 10.15025083    | 0                    | 5.831243265                |              |      |   |
| 0.004560575                        | 1                                     | AGT            | 1                    | 230702523                  | 230714297    |      |   |
| -                                  | 2291                                  | protein_coding |                      | angiotensinogen            | [Source:HGNC |      |   |
| Symbol;Acc:HGNC:333]               | -                                     | 18             | 3                    | 7                          | 0            | 0    |   |
| 0                                  | 0.429677021                           | 0.057733797    |                      | 0.141538767                | 0            |      |   |
| 0                                  | 0                                     |                |                      |                            |              |      |   |
| ENSG00000204568                    | 1963.363964                           | 2207.070666    |                      | 2107.155587                |              |      |   |
| 2649.072771                        | 2744.321212                           | 2687.549308    |                      | 2092.530072                |              |      |   |
| 2693.647764                        | -0.364072131                          | 0.004569452    |                      | 0.034427407                |              |      |   |
| MRPS18B                            | 6                                     | 30617709       | 30626395             | +                          | 1888         |      |   |
| protein_coding                     | mitochondrial ribosomal protein       | S18B           | [Source:HGNC         |                            |              |      |   |
| Symbol;Acc:HGNC:14516]             | -                                     | 1697           | 2381                 | 2155                       | 2637         | 3003 |   |
| 2739                               | 49.15577697                           | 55.60212163    |                      | 52.87467858                |              |      |   |
| 67.53196027                        | 69.31256009                           | 67.72298282    |                      |                            |              |      |   |
| ENSG00000211683                    | 2.313923351                           | 20.3929251     |                      | 7.822387329                | 0            |      |   |
|                                    | 0                                     | 10.17641193    | 0                    | 5.844280291                |              |      |   |
| 0.004571212                        | 1                                     | AP000346.1     | 22                   | 23630618                   |              |      |   |
| 23638941                           | -                                     | 1087           | processed_transcript | novel                      |              |      |   |
| transcript                         | -                                     | 2              | 22                   | 8                          | 0            | 0    | 0 |
| 0.100622514                        | 0.892333289                           | 0.340928179    |                      | 0                          | 0            |      |   |
| 0                                  |                                       |                |                      |                            |              |      |   |
| ENSG00000125637                    | 593.5213396                           | 727.6566456    |                      | 712.8150454                |              |      |   |
| 914.166182                         | 901.979699                            | 1032.238726    |                      | 677.9976769                |              |      |   |
| 949.4615358                        | -0.484906045                          | 0.004571959    |                      | 0.034429328                | PSD4         |      |   |
| 2                                  | 113157325                             | 113209396      |                      | +                          | 13442        |      |   |
| protein_coding                     | pleckstrin and Sec7 domain containing | 4              | [Source:HGNC         |                            |              |      |   |
| Symbol;Acc:HGNC:19096]             | -                                     | 513            | 785                  | 729                        | 910          | 987  |   |
| 1052                               | 2.087123686                           | 2.574777609    |                      | 2.512268732                |              |      |   |
| 3.273246542                        | 3.199719141                           | 3.653405553    |                      |                            |              |      |   |
| ENSG00000254545                    | 0                                     | 1.853902282    |                      | 7.822387329                | 20.09156444  |      |   |
|                                    | 42.95141424                           | 20.60552591    |                      | 3.22542987                 | 27.88283486  |      |   |
|                                    | -3.090665768                          | 0.004588234    |                      | 0.034534876                | AL354919.2   |      |   |
| 1                                  | 31789130                              | 31791322       |                      | +                          | 537          |      |   |
| antisense                          | novel transcript                      |                | -                    | 0                          | 2            | 8    |   |
| 20                                 | 47                                    | 21             | 0                    | 0.164206244                | 0.69010974   |      |   |
|                                    | 1.800764525                           | 3.814013009    |                      | 1.825538703                |              |      |   |
| ENSG00000156642                    | 1797.918444                           | 1629.580106    |                      | 1741.458979                |              |      |   |
| 1228.599166                        | 1477.711422                           | 1038.12602     |                      | 1722.985843                |              |      |   |

|                                     |                                            |                                     |                     |             |
|-------------------------------------|--------------------------------------------|-------------------------------------|---------------------|-------------|
| 1248.145536                         | 0.464719478                                | 0.00460453                          | 0.034640478         | NPTN        |
| 15                                  | 73560014                                   | 73634134                            | - 4032              |             |
| protein_coding                      | neuroplastin                               | [Source:HGNC Symbol;Acc:HGNC:17867] |                     |             |
| -                                   | 1554 1758                                  | 1781 1223                           | 1617 1058           |             |
| 21.07779633                         | 19.22349306                                | 20.461895                           | 14.665847           |             |
| 17.47624378                         | 12.24929743                                |                                     |                     |             |
| ENSG00000235374                     | 62.47593049                                | 59.32487301                         | 63.55689705         |             |
| 139.6363729                         | 114.2324847                                | 126.576802                          | 61.78590018         |             |
| 126.8152198                         | -1.037317183                               | 0.004607174                         | 0.034643317         | SSR4P1      |
| 21                                  | 45070952                                   | 45074165                            | - 2636              |             |
| transcribed_processed_pseudogene    |                                            | signal sequence receptor            |                     |             |
| subunit 4 pseudogene 1              | [Source:HGNC Symbol;Acc:HGNC:23131]        |                                     | -                   |             |
| 54                                  | 64 65                                      | 139 125                             | 129 1.120322522     |             |
|                                     | 1.070455274                                | 1.142274302                         | 2.549591548         | 2.066441927 |
|                                     | 2.284495675                                |                                     |                     |             |
| ENSG00000231298                     | 128.422746                                 | 40.7858502                          | 72.3570828          |             |
| 32.1465031                          | 17.36333767                                | 29.43646558                         | 80.521893           |             |
| 26.31543545                         | 1.612018476                                | 0.004624977                         | 0.03476009          | MANCR       |
| 10                                  | 4650185 4678154                            | - 1920                              | lincRNA mitotically |             |
| associated long non coding RNA      | [Source:HGNC Symbol;Acc:HGNC:44678]        |                                     |                     |             |
| -                                   | 111 44                                     | 74 32                               | 19 30               |             |
| 3.16166945                          | 1.010381547                                | 1.785389379                         | 0.805842125         |             |
| 0.431231989                         | 0.729400509                                |                                     |                     |             |
| ENSG00000171451                     | 658.3111935                                | 390.2464303                         | 458.5874572         |             |
| 790.6030607                         | 699.1028062                                | 812.4464501                         | 502.3816937         |             |
| 767.3841057                         | -0.612913941                               | 0.004627349                         | 0.034760825         | DSEL        |
| 18                                  | 67506582                                   | 67516980                            | - 9531              |             |
| protein_coding                      | dermatan sulfate epimerase like            | [Source:HGNC                        |                     |             |
| Symbol;Acc:HGNC:18144]              | -                                          | 569 421                             | 469 787             | 765         |
| 828                                 | 3.264889668                                | 1.947500529                         | 2.279485474         |             |
| 3.992431554                         | 3.497691997                                | 4.055439278                         |                     |             |
| ENSG00000163605                     | 2647.128314                                | 1948.451298                         | 1995.686567         |             |
| 1333.075301                         | 1934.64136                                 | 1281.467468                         | 2197.088726         |             |
| 1516.39471                          | 0.534320872                                | 0.00463331                          | 0.034788509         | PPP4R2      |
| 3                                   | 72996785                                   | 73069199                            | + 5964              |             |
| protein_coding                      | protein phosphatase 4 regulatory subunit 2 |                                     |                     |             |
| [Source:HGNC Symbol;Acc:HGNC:18296] | -                                          | 2288 2102                           | 2041                |             |
| 1327                                | 2117 1306                                  | 20.98036783                         | 15.53921354         |             |
| 15.85286735                         | 10.75807344                                | 15.46827274                         | 10.22236957         |             |
| ENSG00000114857                     | 2243.348689                                | 2114.375552                         | 2250.891954         |             |
| 1922.762717                         | 1450.295625                                | 1538.545935                         | 2202.872065         |             |
| 1637.201426                         | 0.428291599                                | 0.00464892                          | 0.034872998         | NKTR        |
| 3                                   | 42600614                                   | 42648741                            | + 17356             |             |
| protein_coding                      | natural killer cell triggering receptor    | [Source:HGNC                        |                     |             |
| Symbol;Acc:HGNC:7833]               | -                                          | 1939 2281                           | 2302 1914           | 1587        |
| 1568                                | 6.109742126                                | 5.794415071                         | 6.144097992         |             |
| 5.332041347                         | 3.984610573                                | 4.217377267                         |                     |             |
| ENSG00000090615                     | 3990.36082                                 | 3809.769189                         | 4498.850513         |             |
| 5985.277047                         | 4490.707438                                | 5948.128479                         | 4099.660174         |             |
| 5474.704321                         | -0.417187771                               | 0.004649125                         | 0.034872998         | GOLGA3      |



|                                     |                                                  |             |             |             |        |
|-------------------------------------|--------------------------------------------------|-------------|-------------|-------------|--------|
| 12                                  | 132768909                                        | 132828858   | -           | 10549       |        |
| protein_coding                      | golgin A3 [Source:HGNC Symbol;Acc:HGNC:4426]     |             |             |             | -      |
| 3449                                | 4110                                             | 4601        | 5958        | 4914        | 6062   |
| 17.17767919                         | 20.20428085                                      | 27.30803325 | 20.29936523 |             |        |
| 26.82567604                         |                                                  |             |             |             |        |
| ENSG00000150636                     | 222.1366417                                      | 175.1937656 | 193.6040864 |             |        |
| 72.32963199                         | 140.7344211                                      | 88.30939675 | 196.9781646 |             |        |
| 100.4578166                         | 0.968747041                                      | 0.004654781 | 0.034898304 |             |        |
| CCDC102B                            | 18                                               | 68715209    | 69055189    | +           | 5805   |
| protein_coding                      | coiled-coil domain containing 102B               |             |             |             |        |
| [Source:HGNC Symbol;Acc:HGNC:26295] |                                                  |             | -           | 192         | 189    |
| 72                                  | 154                                              | 90          | 1.808813195 | 1.435468075 |        |
| 1.580030324                         | 0.599696465                                      | 1.156051268 | 0.723746241 |             |        |
| ENSG00000259956                     | 1755.110862                                      | 2369.287116 | 2767.169518 |             |        |
| 3333.190541                         | 3155.558157                                      | 3065.317283 | 2297.189165 |             |        |
| 3184.68866                          | -0.470812282                                     | 0.004663422 | 0.034945948 |             | RBM15B |
| 3                                   | 51391268                                         | 51397908    | +           | 6641        |        |
| protein_coding                      | RNA binding motif protein 15B [Source:HGNC       |             |             |             |        |
| Symbol;Acc:HGNC:24303]              | -                                                | 1517        | 2556        | 2830        | 3318   |
| 3124                                | 12.4924268                                       | 16.96919839 | 19.74037557 |             | 3453   |
| 24.15706222                         | 22.65800644                                      | 21.95955731 |             |             |        |
| ENSG00000143061                     | 75.20250892                                      | 93.62206523 | 231.7382246 |             |        |
| 42.19228532                         | 63.97019142                                      | 51.02320701 | 133.5209329 |             |        |
| 52.39522792                         | 1.349923408                                      | 0.004675888 | 0.035022195 |             | IGSF3  |
| 1                                   | 116574399                                        | 116667755   | -           | 7400        |        |
| protein_coding                      | immunoglobulin superfamily member 3 [Source:HGNC |             |             |             |        |
| Symbol;Acc:HGNC:5950]               | -                                                | 65          | 101         | 237         | 42     |
| 52                                  | 0.480370523                                      | 0.60176041  | 1.483607712 |             | 70     |
| 0.274421913                         | 0.41221607                                       | 0.328033094 |             |             |        |
| ENSG00000169221                     | 1384.883126                                      | 1617.529741 | 1831.416433 |             |        |
| 2143.769926                         | 2228.904241                                      | 2099.801212 | 1611.276433 |             |        |
| 2157.491793                         | -0.42071448                                      | 0.004681825 | 0.035049493 |             |        |
| TBC1D10B                            | 16                                               | 30357102    | 30370264    | -           | 6699   |
| protein_coding                      | TBC1 domain family member 10B [Source:HGNC       |             |             |             |        |
| Symbol;Acc:HGNC:24510]              | -                                                | 1197        | 1745        | 1873        | 2134   |
| 2140                                | 9.771897105                                      | 11.48469356 | 12.95180375 |             | 2439   |
| 15.40230268                         | 15.86574319                                      | 14.91247853 |             |             |        |
| ENSG00000138796                     | 1644.042541                                      | 1411.746588 | 1386.518154 |             |        |
| 998.5507527                         | 1246.504873                                      | 979.2530884 | 1480.769094 |             |        |
| 1074.769571                         | 0.461655842                                      | 0.004688569 | 0.035082795 |             | HADH   |
| 4                                   | 107989714                                        | 108035175   | +           | 12086       |        |
| protein_coding                      | hydroxyacyl-CoA dehydrogenase [Source:HGNC       |             |             |             |        |
| Symbol;Acc:HGNC:4799]               | -                                                | 1421        | 1523        | 1418        | 994    |
| 998                                 | 6.429929345                                      | 5.555859716 | 5.434956804 |             | 1364   |
| 3.976536847                         | 4.918020992                                      | 3.854730208 |             |             |        |
| ENSG00000078618                     | 5814.889382                                      | 4973.092871 | 5181.353807 |             |        |
| 4365.896953                         | 4084.953652                                      | 4058.307389 | 5323.11202  |             |        |
| 4169.719331                         | 0.352184054                                      | 0.004693061 | 0.035089297 |             | NRDC   |
| 1                                   | 51789191                                         | 51878937    | -           | 6773        |        |
| protein_coding                      | nardilysin convertase [Source:HGNC               |             |             |             |        |

|                                     |                                                  |             |             |             |       |             |
|-------------------------------------|--------------------------------------------------|-------------|-------------|-------------|-------|-------------|
| Symbol;Acc:HGNC:7995]               | -                                                | 5026        | 5365        | 5299        | 4346  | 4470        |
| 4136                                | 40.58224995                                      | 34.92388976 |             | 36.24226234 |       |             |
| 31.02486232                         | 28.75974594                                      | 28.5066045  |             |             |       |             |
| ENSG00000163545                     | 93.71389573                                      | 139.0426711 |             | 172.0925212 |       |             |
| 68.3113191                          | 42.95141424                                      | 71.62873292 |             | 134.949696  |       |             |
| 60.96382209                         | 1.14958782                                       | 0.004694028 |             | 0.035089297 |       | NUAK2       |
| 1                                   | 205302059                                        | 205321791   |             | -           | 3441  |             |
| protein_coding                      | NUAK family kinase 2 [Source:HGNC                |             |             |             |       |             |
| Symbol;Acc:HGNC:29558]              | -                                                | 81          | 150         | 176         | 68    | 47          |
| 73                                  | 1.287345321                                      | 1.921943181 |             | 2.369356719 |       |             |
| 0.955488483                         | 0.595212143                                      | 0.990339778 |             |             |       |             |
| ENSG00000178425                     | 797.1465946                                      | 802.739688  |             | 807.6614917 |       |             |
| 576.6278994                         | 588.5257611                                      | 580.8795875 |             | 802.5159248 |       |             |
| 582.0110827                         | 0.463479907                                      | 0.004723673 |             | 0.035275482 |       | NT5DC1      |
| 6                                   | 116100849                                        | 116249497   |             | +           | 7309  |             |
| protein_coding                      | 5'-nucleotidase domain containing 1 [Source:HGNC |             |             |             |       |             |
| Symbol;Acc:HGNC:21556]              | -                                                | 689         | 866         | 826         | 574   | 644         |
| 592                                 | 5.155324094                                      | 5.223888373 |             | 5.235094688 |       |             |
| 3.79712721                          | 3.839604599                                      | 3.781027018 |             |             |       |             |
| ENSG00000166450                     | 249.903722                                       | 161.2894985 |             | 343.2072441 |       |             |
| 181.8286582                         | 40.20983461                                      | 95.17790539 |             | 251.4668215 |       |             |
| 105.7387994                         | 1.251479919                                      | 0.004725329 |             | 0.035275482 |       | PRTG        |
| 15                                  | 55611546                                         | 55743090    |             | -           | 14566 |             |
| protein_coding                      | protogenin [Source:HGNC Symbol;Acc:HGNC:26373]   |             |             |             |       | -           |
| 216                                 | 174                                              | 351         | 181         | 44          | 97    | 0.810976292 |
|                                     | 0.526675239                                      | 1.116270035 | 0.600813228 | 0.131634876 |       |             |
|                                     | 0.310869035                                      |             |             |             |       |             |
| ENSG00000079974                     | 577.3238762                                      | 551.5359288 |             | 320.7178805 |       |             |
| 732.3375239                         | 705.4998254                                      | 832.0707605 |             | 483.1925618 |       |             |
| 756.6360366                         | -0.647651607                                     | 0.004725858 |             | 0.035275482 |       | RABL2B      |
| 22                                  | 50767501                                         | 50783663    |             | -           | 5870  |             |
| protein_coding                      | "RAB, member of RAS oncogene family like 2B      |             |             |             |       |             |
| [Source:HGNC Symbol;Acc:HGNC:9800]" | -                                                |             |             | 499         | 595   | 328         |
| 729                                 | 772                                              | 848         | 4.648974426 | 4.469025394 |       |             |
| 2.588440571                         | 6.004690723                                      | 5.731097499 |             | 6.7437861   |       |             |
| ENSG00000109919                     | 2375.24232                                       | 2346.113337 |             | 2343.782804 |       |             |
| 1986.051145                         | 1789.33764                                       | 1610.174667 |             | 2355.046154 |       |             |
| 1795.187817                         | 0.391646883                                      | 0.004728492 |             | 0.03527792  |       | MTCH2       |
| 11                                  | 47617315                                         | 47642623    |             | -           | 2897  |             |
| protein_coding                      | mitochondrial carrier 2 [Source:HGNC             |             |             |             |       |             |
| Symbol;Acc:HGNC:17587]              | -                                                | 2053        | 2531        | 2397        | 1977  | 1958        |
| 1641                                | 38.75566265                                      | 38.51923097 |             | 38.32851512 |       |             |
| 32.99585532                         | 29.45254241                                      | 26.44271972 |             |             |       |             |
| ENSG00000173068                     | 684.921312                                       | 450.4982545 |             | 653.169342  |       |             |
| 428.9549008                         | 297.91832                                        | 406.2232251 |             | 596.1963028 |       |             |
| 377.6988153                         | 0.658297711                                      | 0.004741977 |             | 0.035361266 |       | BNC2        |
| 9                                   | 16409503                                         | 16870843    |             | -           | 15323 |             |
| protein_coding                      | basonuclin 2 [Source:HGNC Symbol;Acc:HGNC:30988] |             |             |             |       |             |
| zf-C2H2                             | 592                                              | 486         | 668         | 427         | 326   | 414         |
| 2.112869227                         | 1.398383934                                      | 2.019459355 |             | 1.347365088 |       |             |

|                        |                              |                       |                 |             |             |        |
|------------------------|------------------------------|-----------------------|-----------------|-------------|-------------|--------|
| 0.927112414            | 1.261254055                  |                       |                 |             |             |        |
| ENSG00000146147        | 16.19746346                  | 12.05036483           | 1.955596832     | 0           |             |        |
| 0                      | 0                            | 10.06780837           | 0               | 5.822353335 |             |        |
| 0.004743918            | 1                            | MLIP                  | 6               | 53929982    | 54266280    |        |
| +                      | 7293                         | protein_coding        | muscular        | LMNA        | interacting |        |
| protein [Source:HGNC   | Symbol;Acc:HGNC:21355]       | -                     | 14              | 13          |             |        |
| 2                      | 0                            | 0                     | 0               | 0.104982409 | 0.078590689 |        |
| 0.012703583            | 0                            | 0                     | 0               |             |             |        |
| ENSG00000118418        | 617.8175348                  | 844.4524893           | 673.7031087     |             |             |        |
| 439.000683             | 486.1734548                  | 529.8563805           | 711.9910443     |             |             |        |
| 485.0101728            | 0.554571854                  | 0.004756025           | 0.035448733     |             |             | HMG3   |
| 6                      | 79201245                     | 79234738              | -               | 1014        |             |        |
| protein_coding         | high mobility group          | nucleosomal           | binding domain  | 3           |             |        |
| [Source:HGNC           | Symbol;Acc:HGNC:12312]       | Others                | 534             | 911         | 689         |        |
| 437                    | 532                          | 540                   | 28.80036652     | 39.61086988 |             |        |
| 31.47630339            | 20.83745613                  | 22.86295045           | 24.86004101     |             |             |        |
| ENSG00000174343        | 35.86581195                  | 65.813531             | 21.51156516     |             |             |        |
| 102.4669786            | 95.04142725                  | 120.6895089           | 41.06363603     |             |             |        |
| 106.0659716            | -1.365308544                 | 0.004763242           | 0.035470539     |             |             | CHRNA9 |
| 4                      | 40335329                     | 40355217              | +               | 3168        |             |        |
| protein_coding         | cholinergic receptor         | nicotinic             | alpha 9 subunit |             |             |        |
| [Source:HGNC           | Symbol;Acc:HGNC:14079]       | -                     | 31              | 71          | 22          |        |
| 102                    | 104                          | 123                   | 0.535144706     | 0.988114185 |             |        |
| 0.32169178             | 1.556740469                  | 1.430562262           | 1.812449749     |             |             |        |
| ENSG00000166166        | 897.8022604                  | 1300.512451           | 1170.424704     |             |             |        |
| 1562.119135            | 1574.580569                  | 1540.508366           | 1122.913138     |             |             |        |
| 1559.069357            | -0.472526009                 | 0.004763591           | 0.035470539     |             |             |        |
| TRMT61A                | 14                           | 103529184             | 103537073       | +           | 3229        |        |
| protein_coding         | tRNA methyltransferase       | 61A [Source:HGNC      |                 |             |             |        |
| Symbol;Acc:HGNC:23790] | -                            | 776                   | 1403            | 1197        | 1555        | 1723   |
| 1570                   | 13.14281483                  | 19.1568273            | 17.17230372     |             |             |        |
| 23.2843203             | 23.25283073                  | 22.69748006           |                 |             |             |        |
| ENSG00000008311        | 410.7213949                  | 321.6520459           | 494.7659986     |             |             |        |
| 121.5539649            | 286.9520015                  | 260.0221127           | 409.0464798     |             |             |        |
| 222.842693             | 0.875117259                  | 0.0047759             | 0.035544881     |             |             | AASS   |
| 7                      | 122075647                    | 122144280             | -               | 4591        |             |        |
| protein_coding         | aminoadipate-semialdehyde    | synthase [Source:HGNC |                 |             |             |        |
| Symbol;Acc:HGNC:17366] | -                            | 355                   | 347             | 506         | 121         | 314    |
| 265                    | 4.228786633                  | 3.332392436           | 5.105586986     |             |             |        |
| 1.274322332            | 2.98044391                   | 2.694539888           |                 |             |             |        |
| ENSG00000138073        | 654.8403085                  | 900.0695578           | 877.0851793     |             |             |        |
| 1211.521336            | 1091.148694                  | 1122.510554           | 810.6650152     |             |             |        |
| 1141.726861            | -0.492889659                 | 0.004786642           | 0.035607495     |             |             | PREB   |
| 2                      | 27130756                     | 27134675              | -               | 3221        |             |        |
| protein_coding         | prolactin regulatory element | binding [Source:HGNC  |                 |             |             |        |
| Symbol;Acc:HGNC:9356]  | Others                       | 566                   | 971             | 897         | 1206        | 1194   |
| 1144                   | 9.609934312                  | 13.29114705           | 12.90042963     |             |             |        |
| 18.10330213            | 16.15370694                  | 16.57987819           |                 |             |             |        |
| ENSG00000185238        | 760.1238209                  | 802.739688            | 697.1702707     |             |             |        |
| 542.4722399            | 440.4804609                  | 584.8044496           | 753.3445932     |             |             |        |

|                        |                                                        |                        |                |        |
|------------------------|--------------------------------------------------------|------------------------|----------------|--------|
| 522.5857168            | 0.528101787                                            | 0.004790591            | 0.035619532    | PRMT3  |
| 11                     | 20387530                                               | 20509294               | + 5467         |        |
| protein_coding         | protein arginine methyltransferase 3 [Source:HGNC      |                        |                |        |
| Symbol;Acc:HGNC:30163] | -                                                      | 657 866                | 713 540        | 482    |
| 596                    | 6.572203592                                            | 6.983976608            | 6.041474013    |        |
| 4.775797484            | 3.841992937                                            | 5.089126212            |                |        |
| ENSG00000173166        | 236.0201818                                            | 249.3498569            | 220.9824421    |        |
| 149.6821551            | 122.4572236                                            | 142.2762503            | 235.4508269    |        |
| 138.138543             | 0.770020098                                            | 0.004792945            | 0.035619715    | RAPH1  |
| 2                      | 203394345                                              | 203535410              | - 11697        |        |
| protein_coding         | Ras association (RalGDS/AF-6) and pleckstrin homology  |                        |                |        |
| domains 1 [Source:HGNC | Symbol;Acc:HGNC:14436]                                 | -                      | 204 269        |        |
| 226                    | 149 134 145                                            | 0.953784785            | 1.013938813    |        |
|                        | 0.895027553 0.615903958                                | 0.499216471            | 0.578681433    |        |
| ENSG00000173818        | 466.2555553                                            | 733.2183524            | 541.7003226    |        |
| 734.3466803            | 892.8411002                                            | 1003.783476            | 580.3914101    |        |
| 876.990419             | -0.594381297                                           | 0.004829411            | 0.035857411    | ENDOV  |
| 17                     | 80415165                                               | 80438086               | + 7253         |        |
| protein_coding         | endonuclease V [Source:HGNC                            | Symbol;Acc:HGNC:26640] |                |        |
| -                      | 403 791                                                | 554 731                | 977 1023       |        |
| 3.038659807            | 4.80831337                                             | 3.538299109            | 4.873050544    |        |
| 5.869964625            | 6.584214822                                            |                        |                |        |
| ENSG00000124333        | 2573.082767                                            | 1868.7335              | 1865.639378    |        |
| 1423.487341            | 1704.348671                                            | 1401.175762            | 2102.485215    |        |
| 1509.670591            | 0.477199868                                            | 0.004829621            | 0.035857411    | VAMP7  |
| X                      | 155881293                                              | 155943769              | + 2667         |        |
| protein_coding         | vesicle associated membrane protein 7 [Source:HGNC     |                        |                |        |
| Symbol;Acc:HGNC:11486] | -                                                      | 2224 2016              | 1908 1417 1865 |        |
| 1428                   | 45.60437204                                            | 33.32740277            | 33.14040492    |        |
| 25.68905041            | 30.47294433                                            | 24.99488987            |                |        |
| ENSG00000072210        | 885.0756819                                            | 950.1249194            | 877.0851793    |        |
| 709.2322247            | 640.6157741                                            | 618.1657773            | 904.0952602    |        |
| 656.004592             | 0.46307361                                             | 0.004839007            | 0.035909657    |        |
| ALDH3A2 17             | 19648136                                               | 19677598               | + 6457         |        |
| protein_coding         | aldehyde dehydrogenase 3 family member A2 [Source:HGNC |                        |                |        |
| Symbol;Acc:HGNC:403]   | -                                                      | 765 1025               | 897 706 701    |        |
| 630                    | 6.479259311                                            | 6.998855659            | 6.435230577    |        |
| 5.286583926            | 4.730922452                                            | 4.554658279            |                |        |
| ENSG00000151640        | 548.3998343                                            | 725.8027433            | 626.7687848    |        |
| 790.6030607            | 925.7400558                                            | 1013.595632            | 633.6571208    |        |
| 909.9795827            | -0.521268838                                           | 0.004851677            | 0.035986213    | DPYSL4 |
| 10                     | 132186900                                              | 132205776              | + 3176         |        |
| protein_coding         | dihydropyrimidinase like 4 [Source:HGNC                |                        |                |        |
| Symbol;Acc:HGNC:3016]  | -                                                      | 474 783                | 641 787 1013   |        |
| 1033                   | 8.161924266                                            | 10.86964164            | 9.349319287    |        |
| 11.98106585            | 13.89912784                                            | 15.18328918            |                |        |
| ENSG00000165684        | 672.1947336                                            | 1015.011499            | 1066.778072    |        |
| 1304.94711             | 1268.43751                                             | 1409.025486            | 917.9947683    |        |
| 1327.470035            | -0.531008875                                           | 0.004908116            | 0.036387182    | SNAPC4 |
| 9                      | 136375577                                              | 136400168              | - 5045         |        |

|                                     |                                                            |                |                          |              |             |  |        |
|-------------------------------------|------------------------------------------------------------|----------------|--------------------------|--------------|-------------|--|--------|
| protein_coding                      | small nuclear RNA activating complex polypeptide 4         |                |                          |              |             |  |        |
| [Source:HGNC Symbol;Acc:HGNC:11137] | MYB                                                        | 581            | 1095                     | 1091         |             |  |        |
| 1299                                | 1388                                                       | 1436           | 6.298101777              | 9.569448435  |             |  |        |
| 10.01765419                         | 12.44942224                                                |                | 11.98910858              | 13.28737846  |             |  |        |
| ENSG00000100505                     | 219.8227184                                                |                | 206.7101044              | 114.4024147  |             |  |        |
| 363.6573164                         | 274.1579632                                                |                | 321.8386904              | 180.3117458  |             |  |        |
| 319.8846567                         | -0.828058077                                               |                | 0.004911412              | 0.036390388  |             |  | TRIM9  |
| 14                                  | 50975262                                                   |                | 51096061                 | -            | 8945        |  |        |
| protein_coding                      | tripartite motif containing 9                              |                |                          |              |             |  |        |
| [Source:HGNC Symbol;Acc:HGNC:16288] | -                                                          | 190            | 223                      | 117          | 362         |  | 300    |
| 328                                 | 1.161630399                                                |                | 1.099153826              | 0.605909794  |             |  |        |
| 1.956723416                         | 1.461502315                                                |                | 1.711746839              |              |             |  |        |
| ENSG00000181929                     | 1469.341328                                                |                | 1423.796952              | 1353.273008  |             |  |        |
| 1756.002732                         | 2001.353132                                                |                | 1813.28628               | 1415.470429  |             |  |        |
| 1856.880715                         | -0.391877463                                               |                | 0.004915551              | 0.036390388  |             |  | PRKAG1 |
| 12                                  | 49002274                                                   |                | 49018825                 | -            | 4184        |  |        |
| protein_coding                      | protein kinase AMP-activated non-catalytic subunit gamma 1 |                |                          |              |             |  |        |
| [Source:HGNC Symbol;Acc:HGNC:9385]  | -                                                          |                |                          | 1270         | 1536        |  |        |
| 1384                                | 1748                                                       | 2190           | 1848                     | 16.59994916  | 16.18577496 |  |        |
| 15.32310826                         | 20.19998137                                                |                | 22.80925165              | 20.61846486  |             |  |        |
| ENSG00000231079                     | 2.313923351                                                |                | 12.97731597              | 0            | 8.036625776 |  |        |
| 75.85036983                         | 41.21105182                                                |                | 5.097079774              | 41.69934914  |             |  |        |
| -3.015554474                        | 0.004916212                                                |                | 0.036390388              | AC105402.3   |             |  |        |
| 2                                   | 148866470                                                  |                | 148888823                | -            | 4156        |  |        |
| antisense                           | novel transcript                                           |                |                          | 2            | 14          |  | 0      |
| 8                                   | 83                                                         | 42             | 0.026317775              | 0.148520518  |             |  | 0      |
| 0.093071275                         | 0.870284305                                                |                | 0.471758558              |              |             |  |        |
| ENSG00000163870                     | 770.536476                                                 |                | 1100.291004              | 894.6855508  |             |  |        |
| 1330.061566                         | 1261.126631                                                |                | 1271.655313              | 921.837677   |             |  |        |
| 1287.614503                         | -0.481117829                                               |                | 0.00491807               | 0.036390388  |             |  | TPRA1  |
| 3                                   | 127571266                                                  |                | 127598267                | -            | 5622        |  |        |
| protein_coding                      | transmembrane protein adipocyte associated 1               |                |                          |              |             |  |        |
| [Source:HGNC Symbol;Acc:HGNC:30413] | -                                                          |                |                          | 666          | 1187        |  | 915    |
| 1324                                | 1380                                                       | 1296           | 6.478554262              | 9.308802917  |             |  |        |
| 7.539329229                         | 11.38671263                                                |                | 10.69662678              | 10.76118744  |             |  |        |
| ENSG00000180901                     | 940.6098424                                                |                | 1011.303695              | 1177.269293  |             |  |        |
| 1418.464449                         | 1567.26969                                                 |                | 1294.22327               | 1043.060943  |             |  |        |
| 1426.65247                          | -0.451542123                                               |                | 0.004923567              | 0.036413435  |             |  | KCTD2  |
| 17                                  | 75032575                                                   |                | 75065889                 | +            | 5279        |  |        |
| protein_coding                      | potassium channel tetramerization domain containing 2      |                |                          |              |             |  |        |
| [Source:HGNC Symbol;Acc:HGNC:21294] | -                                                          |                |                          | 813          | 1091        |  | 1204   |
| 1412                                | 1715                                                       | 1319           | 8.422356037              | 9.111860172  |             |  |        |
| 10.56518925                         | 12.93255253                                                |                | 14.1569944               | 11.66377597  |             |  |        |
| ENSG00000184313                     | 0                                                          | 0              | 0                        | 17.07782977  | 5.483159264 |  |        |
| 6.868508636                         | 0                                                          |                | 9.809832558              | -5.712914616 |             |  |        |
| 0.004924068                         | 1                                                          | MROH7          | 1                        | 54641754     | 54710266    |  |        |
| +                                   | 9088                                                       | protein_coding | maestro heat like repeat |              |             |  |        |
| family member 7                     | [Source:HGNC Symbol;Acc:HGNC:24802]                        | -              |                          |              |             |  | 0      |
| 0                                   | 0                                                          | 17             | 6                        | 7            | 0           |  | 0      |
| 0.090444429                         | 0.02877011                                                 |                | 0.035956363              |              |             |  |        |

|                                                   |                                                     |             |                          |             |             |
|---------------------------------------------------|-----------------------------------------------------|-------------|--------------------------|-------------|-------------|
| ENSG00000164307                                   | 771.6934377                                         | 742.4878638 | 1058.955685              |             |             |
| 568.5912737                                       | 626.9078759                                         | 573.0298634 | 857.7123287              |             |             |
| 589.509671                                        | 0.541056806                                         | 0.004927343 | 0.036423741              | ERAP1       |             |
| 5                                                 | 96760810                                            | 96808100    | - 7945                   |             |             |
| protein_coding                                    | endoplasmic reticulum aminopeptidase 1 [Source:HGNC |             |                          |             |             |
| Symbol;Acc:HGNC:18173]                            | -                                                   | 667 801     | 1083 566                 | 686         |             |
| 584                                               | 4.591204581                                         | 4.445008262 | 6.31447155               |             |             |
| 3.444480624                                       | 3.762606591                                         | 3.431349706 |                          |             |             |
| ENSG00000164587                                   | 11626.30788                                         | 14928.54812 | 14597.55255              |             |             |
| 16145.58118                                       | 17160.46078                                         | 21714.29945 | 13717.46952              |             |             |
| 18340.1138                                        | -0.418916263                                        | 0.004939236 | 0.036494008              | RPS14       |             |
| 5                                                 | 150442635                                           | 150449756   | - 5099                   |             |             |
| protein_coding                                    | ribosomal protein S14 [Source:HGNC                  |             |                          |             |             |
| Symbol;Acc:HGNC:10387]                            | -                                                   | 10049 16105 | 14929 16072              | 18778       |             |
| 22130                                             | 107.7786022                                         | 139.2546401 | 135.6276266              |             |             |
| 152.4004075                                       | 160.4807408                                         | 202.601398  |                          |             |             |
| ENSG00000114416                                   | 4756.269449                                         | 4283.441222 | 4354.136347              |             |             |
| 3521.046668                                       | 3676.458287                                         | 3339.076413 | 4464.615673              |             |             |
| 3512.193789                                       | 0.345988843                                         | 0.004950078 | 0.036556446              | FXR1        |             |
| 3                                                 | 180868141                                           | 180982753   | + 12054                  |             |             |
| protein_coding                                    | FMR1 autosomal homolog 1 [Source:HGNC               |             |                          |             |             |
| Symbol;Acc:HGNC:4023]                             | -                                                   | 4111 4621   | 4453 3505                | 4023        |             |
| 3403                                              | 18.65138137                                         | 16.90202499 | 17.11291384              |             |             |
| 14.05911721                                       | 14.54378491                                         | 13.17882824 |                          |             |             |
| ENSG00000205531                                   | 3069.419326                                         | 3078.404739 | 2865.927158              |             |             |
| 2298.474972                                       | 2532.30572                                          | 2135.12497  | 3004.583741              |             |             |
| 2321.968554                                       | 0.371679626                                         | 0.004966638 | 0.036643471              | NAP1L4      |             |
| 11                                                | 2944431 2992377                                     | - 5200      | protein_coding           |             |             |
| nucleosome assembly protein 1 like 4 [Source:HGNC |                                                     |             |                          |             |             |
| Symbol;Acc:HGNC:7640]                             | -                                                   | 2653 3321   | 2931 2288                | 2771        |             |
| 2176                                              | 27.90156857                                         | 28.15784993 | 26.1104845               |             |             |
| 21.2742321                                        | 23.22158075                                         | 19.53446778 |                          |             |             |
| ENSG00000169100                                   | 6650.215712                                         | 9344.594451 | 8576.269908              |             |             |
| 10578.20868                                       | 10593.4637                                          | 11212.34974 | 8190.360024              |             |             |
| 10794.67404                                       | -0.398153209                                        | 0.004966656 | 0.036643471              |             |             |
| SLC25A6 X                                         | 1386152 1392724                                     | - 2164      | protein_coding           | solute      |             |
| carrier family 25 member 6 [Source:HGNC           | Symbol;Acc:HGNC:10992]                              |             |                          |             |             |
| 5748                                              | 10081 8771                                          | 10530 11592 | 11427 145.2627347        | -           |             |
| 205.390483                                        | 187.7562101                                         | 235.2731305 | 233.431636               |             |             |
| 246.5023176                                       |                                                     |             |                          |             |             |
| ENSG00000284977                                   | 23.13923351                                         | 1.853902282 | 5.866790497              | 0           |             |
| 0                                                 | 0                                                   | 10.2866421  | 0                        | 5.849883493 |             |
| 0.004977444                                       | 1                                                   | AL160272.1  | 9                        | 117759455   |             |
| 117879988                                         | +                                                   | 17450       | lincRNA novel transcript | -           |             |
| 20                                                | 2                                                   | 6           | 0                        | 0           | 0.062680042 |
| 0.005053224                                       | 0.015927891                                         | 0           | 0                        | 0           |             |
| ENSG00000070950                                   | 1892.789301                                         | 1516.492066 | 1495.053778              |             |             |
| 1237.64037                                        | 1267.52365                                          | 1099.942597 | 1634.778382              |             |             |
| 1201.702206                                       | 0.443424164                                         | 0.004980112 | 0.036725024              | RAD18       |             |
| 3                                                 | 8775402 8963773                                     | - 6983      |                          |             |             |

|                        |                                                      |             |             |             |             |                |  |
|------------------------|------------------------------------------------------|-------------|-------------|-------------|-------------|----------------|--|
| protein_coding         | "RAD18, E3 ubiquitin protein ligase [Source:HGNC     |             |             |             |             |                |  |
| Symbol;Acc:HGNC:18278] | " -                                                  | 1636        | 1636        | 1529        | 1232        | 1387           |  |
|                        | 1121                                                 | 12.81256171 | 10.32940285 | 10.14303442 |             |                |  |
| 8.530409548            | 8.655517061                                          | 7.493929557 |             |             |             |                |  |
| ENSG00000167685        | 562.2833744                                          | 728.5835967 | 807.6614917 |             |             |                |  |
| 1140.196282            | 993.3656868                                          | 898.7934158 | 699.5094876 |             |             |                |  |
| 1010.785128            | -0.530001382                                         | 0.004998398 | 0.036842097 |             |             | ZNF444         |  |
|                        | 19                                                   | 56132599    | 56160893    | +           | 7239        |                |  |
| protein_coding         | zinc finger protein 444 [Source:HGNC                 |             |             |             |             |                |  |
| Symbol;Acc:HGNC:16052] | zf-C2H2                                              | 486         | 786         | 826         | 1135        | 1087           |  |
|                        | 916                                                  | 3.671575011 | 4.787159827 | 5.285717236 |             |                |  |
| 7.580860437            | 6.543491841                                          | 5.906945078 |             |             |             |                |  |
| ENSG00000154845        | 2246.819574                                          | 2046.708119 | 2018.175931 |             |             |                |  |
| 1707.782977            | 1657.741818                                          | 1400.194546 | 2103.901208 |             |             |                |  |
| 1588.573114            | 0.405104816                                          | 0.005013974 | 0.036939091 |             |             | PPP4R1         |  |
|                        | 18                                                   | 9546791     | 9615240     | -           | 8131        | protein_coding |  |
| protein                | phosphatase 4 regulatory subunit 1 [Source:HGNC      |             |             |             |             |                |  |
| Symbol;Acc:HGNC:9320]  | -                                                    | 1942        | 2208        | 2064        | 1700        | 1814           |  |
|                        | 1427                                                 | 13.0617082  | 11.97261634 | 11.75894036 |             |                |  |
| 10.10895299            | 9.721917233                                          | 8.192681055 |             |             |             |                |  |
| ENSG00000170222        | 171.230328                                           | 167.7781565 | 149.6031577 |             |             |                |  |
| 239.0896168            | 303.4014793                                          | 267.8718368 | 162.8705474 |             |             |                |  |
| 270.1209777            | -0.730734524                                         | 0.005026255 | 0.037011738 |             |             | ADPRM          |  |
|                        | 17                                                   | 10697594    | 10711233    | +           | 1620        |                |  |
| protein_coding         | "ADP-ribose/CDP-alcohol diphosphatase, manganese     |             |             |             |             |                |  |
| dependent [Source:HGNC | Symbol;Acc:HGNC:30925]"                              | -           |             | 148         | 181         |                |  |
|                        | 153                                                  | 238         | 332         | 273         | 4.99621839  | 4.926035284    |  |
|                        | 4.375008207                                          | 7.103349101 | 8.930621161 | 7.86671956  |             |                |  |
| ENSG00000136444        | 1258.774303                                          | 1591.575109 | 1380.651364 |             |             |                |  |
| 1747.966106            | 1832.289054                                          | 2154.749281 | 1410.333592 |             |             |                |  |
| 1911.668147            | -0.438288716                                         | 0.005040264 | 0.037097024 |             |             | RSAD1          |  |
|                        | 17                                                   | 50478800    | 50485975    | +           | 4198        |                |  |
| protein_coding         | radical S-adenosyl methionine domain containing 1    |             |             |             |             |                |  |
| [Source:HGNC           | Symbol;Acc:HGNC:25634]                               | -           |             | 1088        | 1717        | 1412           |  |
|                        | 1740                                                 | 2005        | 2196        | 14.17363269 | 18.03274407 |                |  |
| 15.58097814            | 20.0404759                                           | 20.81280142 | 24.41945333 |             |             |                |  |
| ENSG00000119333        | 1272.657843                                          | 1780.673142 | 2135.511741 |             |             |                |  |
| 1217.548805            | 1212.692057                                          | 1194.139287 | 1729.614242 |             |             |                |  |
| 1208.126717            | 0.518229481                                          | 0.005053779 | 0.037178596 |             |             | WDR34          |  |
|                        | 9                                                    | 128633661   | 128656787   | -           | 2604        |                |  |
| protein_coding         | WD repeat domain 34 [Source:HGNC                     |             |             |             |             |                |  |
| Symbol;Acc:HGNC:28296] | -                                                    | 1100        | 1921        | 2184        | 1212        | 1327           |  |
|                        | 1217                                                 | 23.10183183 | 32.5252275  | 38.85206529 |             |                |  |
| 22.50416257            | 22.20693087                                          | 21.81703027 |             |             |             |                |  |
| ENSG00000183814        | 831.8554448                                          | 610.8608018 | 672.7253103 |             |             |                |  |
| 468.1334515            | 524.5555696                                          | 457.2464321 | 705.1471857 |             |             |                |  |
| 483.3118177            | 0.543745441                                          | 0.005065372 | 0.037245955 |             |             | LIN9           |  |
|                        | 1                                                    | 226231149   | 226309869   | -           | 4442        |                |  |
| protein_coding         | lin-9 DREAM MuvB core complex component [Source:HGNC |             |             |             |             |                |  |
| Symbol;Acc:HGNC:30830] | -                                                    | 719         | 659         | 688         | 466         | 574            |  |

|                                     |                                              |             |             |             |      |
|-------------------------------------|----------------------------------------------|-------------|-------------|-------------|------|
| 466                                 | 8.852074267                                  | 6.540949835 | 7.174841968 |             |      |
| 5.072342596                         | 5.631083093                                  | 4.897262668 |             |             |      |
| ENSG00000177733                     | 3052.064901                                  | 3846.847235 | 4084.263984 |             |      |
| 4714.485596                         | 4699.06749                                   | 5036.579261 | 3661.058706 |             |      |
| 4816.710782                         | -0.39548458                                  | 0.005082615 | 0.037354774 |             |      |
| HNRNPA0 5                           | 137745651                                    | 137754376   | -           | 8726        |      |
| protein_coding                      | heterogeneous nuclear ribonucleoprotein A0   |             |             |             |      |
| [Source:HGNC Symbol;Acc:HGNC:5030]  | -                                            | 2638        | 4150        | 4177        |      |
| 4693                                | 5142                                         | 5133        | 16.5331001  | 20.96847499 |      |
| 22.17439209                         | 26.00378473                                  | 25.67884355 | 27.46009855 |             |      |
| ENSG00000160714                     | 2313.923351                                  | 2384.118334 | 2093.466409 |             |      |
| 3096.11008                          | 2865.864576                                  | 2798.426662 | 2263.836032 |             |      |
| 2920.133772                         | -0.367250656                                 | 0.005089983 | 0.037390951 | UBE2Q1      |      |
| 1                                   | 154548577                                    | 154559028   | -           | 4161        |      |
| protein_coding                      | ubiquitin conjugating enzyme E2 Q1           |             |             |             |      |
| [Source:HGNC Symbol;Acc:HGNC:15698] | -                                            | 2000        | 2572        | 2141        | 3082 |
| 2852                                | 26.28615065                                  | 27.25255385 | 23.83534307 | 3136        |      |
| 35.81262334                         | 32.84255501                                  | 31.99615863 |             |             |      |
| ENSG00000114503                     | 4114.155719                                  | 3599.35128  | 3101.576576 |             |      |
| 4867.181486                         | 4827.921732                                  | 4473.361553 | 3605.027858 |             |      |
| 4722.82159                          | -0.389885868                                 | 0.00509787  | 0.037413623 | NCBP2       |      |
| 3                                   | 196935402                                    | 196942597   | -           | 5114        |      |
| protein_coding                      | nuclear cap binding protein subunit 2        |             |             |             |      |
| [Source:HGNC Symbol;Acc:HGNC:7659]  | -                                            | 3556        | 3883        | 3172        | 4845 |
| 4559                                | 38.02732193                                  | 33.47654463 | 28.73259893 | 5283        |      |
| 45.80725571                         | 45.01720059                                  | 41.61547963 |             |             |      |
| ENSG00000138468                     | 548.3998343                                  | 419.9088668 | 420.4533189 |             |      |
| 279.2727457                         | 339.0420145                                  | 282.5900696 | 462.9206733 |             |      |
| 300.30161                           | 0.622779485                                  | 0.005099795 | 0.037413623 | SENP7       |      |
| 3                                   | 101324205                                    | 101513241   | -           | 6396        |      |
| protein_coding                      | SUMO specific peptidase 7                    |             |             |             |      |
| [Source:HGNC Symbol;Acc:HGNC:30402] | -                                            | 474         | 453         | 430         | 278  |
| 288                                 | 4.052887972                                  | 3.122652844 | 3.114314418 | 371         |      |
| 2.1015395                           | 2.527691408                                  | 2.101987207 |             |             |      |
| ENSG00000114023                     | 1492.480562                                  | 1455.313291 | 1202.692052 |             |      |
| 1414.446137                         | 2216.110203                                  | 2426.54598  | 1383.495302 |             |      |
| 2019.034106                         | -0.545611                                    | 0.005100412 | 0.037413623 |             |      |
| FAM162A 3                           | 122384176                                    | 122412334   | +           | 3793        |      |
| protein_coding                      | family with sequence similarity 162 member A |             |             |             |      |
| [Source:HGNC Symbol;Acc:HGNC:17865] | -                                            | 1290        | 1570        | 1230        |      |
| 1408                                | 2425                                         | 2473        | 18.59951331 | 18.24949149 |      |
| 15.02189509                         | 17.9482053                                   | 27.86040966 | 30.43598136 |             |      |
| ENSG00000101574                     | 395.6808931                                  | 279.9392445 | 332.4514615 |             |      |
| 189.865284                          | 233.9481286                                  | 194.2806729 | 336.0238664 |             |      |
| 206.0313618                         | 0.703858931                                  | 0.005106125 | 0.037437572 | METTL4      |      |
| 18                                  | 2537525                                      | 2571509     | -           | 5724        |      |
| protein_coding                      | methyltransferase like 4                     |             |             |             |      |
| [Source:HGNC Symbol;Acc:HGNC:24726] | -                                            | 342         | 302         | 340         | 189  |
| 342                                 | 302                                          | 340         | 189         | 256         | 198  |
| 2.326169065                         | 2.751577489                                  | 1.596479681 | 1.948942104 |             |      |
| 1.614773453                         |                                              |             |             |             |      |



|                                    |                                                                           |             |             |             |
|------------------------------------|---------------------------------------------------------------------------|-------------|-------------|-------------|
| ENSG00000164418                    | 135.3645161                                                               | 42.63975248 | 73.33488121 |             |
| 40.18312888                        | 20.1049173                                                                | 2.943646558 | 83.77971658 |             |
| 21.07723091                        | 1.990124801                                                               | 0.005111686 | 0.037446974 | GRIK2       |
| 6                                  | 101181257                                                                 | 102070083   | + 7585      |             |
| protein_coding                     | glutamate ionotropic receptor kainate type subunit 2                      |             |             |             |
| [Source:HGNC Symbol;Acc:HGNC:4580] | -                                                                         | 117         | 46          | 75          |
| 40                                 | 22                                                                        | 3           | 0.843577503 | 0.267384486 |
| 0.458044987                        | 0.25497971                                                                | 0.126393777 | 0.018463401 |             |
| ENSG00000171951                    | 57.84808379                                                               | 63.03267758 | 92.89084954 |             |
| 6.027469332                        | 29.24351608                                                               | 28.45525006 | 71.25720363 |             |
| 21.24207849                        | 1.743594114                                                               | 0.005112307 | 0.037446974 | SCG2        |
| 2                                  | 223596940                                                                 | 223602503   | - 2719      |             |
| protein_coding                     | secretogranin II [Source:HGNC Symbol;Acc:HGNC:10575]                      |             |             |             |
| -                                  | 50                                                                        | 68          | 95          | 6           |
| 1.005670034                        | 1.102639797                                                               | 1.618515465 | 0.106694801 |             |
| 0.512860638                        | 0.497891631                                                               |             |             |             |
| ENSG00000169504                    | 15443.12445                                                               | 11975.28179 | 12248.88076 |             |
| 9313.444696                        | 11251.44281                                                               | 9646.329772 | 13222.429   |             |
| 10070.40576                        | 0.392743305                                                               | 0.005120199 | 0.037469917 | CLIC4       |
| 1                                  | 24745357                                                                  | 24844324    | + 4495      |             |
| protein_coding                     | chloride intracellular channel 4 [Source:HGNC Symbol;Acc:HGNC:13518]      |             |             |             |
| -                                  | 13348                                                                     | 12919       | 12527       | 9271        |
| 9831                               | 162.3982013                                                               | 126.7164974 | 129.098096  | 12312       |
| 99.72363523                        | 119.3596423                                                               | 102.097248  |             |             |
| ENSG00000108344                    | 4821.059303                                                               | 5930.633399 | 6038.883018 |             |
| 7875.893261                        | 6565.169359                                                               | 7489.61806  | 5596.858573 |             |
| 7310.226893                        | -0.385082018                                                              | 0.005120341 | 0.037469917 | PSMD3       |
| 17                                 | 39980797                                                                  | 39997960    | + 4964      |             |
| protein_coding                     | "proteasome 26S subunit, non-ATPase 3 [Source:HGNC Symbol;Acc:HGNC:9560]" |             |             |             |
| -                                  | 4167                                                                      | 6398        | 6176        | 7840        |
| 7633                               | 45.90779571                                                               | 56.82591284 | 57.63389491 | 7184        |
| 76.3634439                         | 63.06568955                                                               | 71.78100348 |             |             |
| ENSG00000154065                    | 203.6252549                                                               | 203.0022998 | 169.159126  |             |
| 266.2132288                        | 396.6151868                                                               | 294.3646558 | 191.9288936 |             |
| 319.0643572                        | -0.73429263                                                               | 0.005133766 | 0.037550186 |             |
| ANKRD29                            | 18                                                                        | 23598926    | 23662885    | - 6391      |
| protein_coding                     | ankyrin repeat domain 29 [Source:HGNC Symbol;Acc:HGNC:27110]              |             |             |             |
| -                                  | 176                                                                       | 219         | 173         | 265         |
| 300                                | 1.506047131                                                               | 1.510807928 | 1.253948619 | 434         |
| 2.004833326                        | 2.959235373                                                               | 2.191283018 |             |             |
| ENSG00000135541                    | 949.8655358                                                               | 687.7977465 | 563.2118877 |             |
| 541.4676617                        | 429.5141424                                                               | 459.2088631 | 733.6250567 |             |
| 476.7302224                        | 0.621106235                                                               | 0.005140375 | 0.037580538 | AHI1        |
| 6                                  | 135283532                                                                 | 135497776   | - 8705      |             |
| protein_coding                     | Abelson helper integration site 1 [Source:HGNC Symbol;Acc:HGNC:21575]     |             |             |             |
| -                                  | 821                                                                       | 742         | 576         | 539         |
| 468                                | 5.15785459                                                                | 3.758106539 | 3.065181275 | 470         |
| 2.993789123                        | 2.352814458                                                               | 2.509707529 |             |             |
| ENSG00000134014                    | 1812.958946                                                               | 1794.577409 | 1581.100039 |             |
| 2228.154496                        | 2434.522713                                                               | 2128.256462 | 1729.545464 |             |

|                                       |                                                        |                |                 |              |          |
|---------------------------------------|--------------------------------------------------------|----------------|-----------------|--------------|----------|
| 2263.644557                           | -0.388471359                                           | 0.005162476    | 0.037724077     | ELP3         |          |
| 8                                     | 28089673                                               | 28191156       | + 5390          |              |          |
| protein_coding                        | elongator acetyltransferase complex subunit 3          |                |                 |              |          |
| [Source:HGNC Symbol;Acc:HGNC:20696]   | -                                                      | 1567           | 1936            | 1617         |          |
| 2218                                  | 2664                                                   | 2169           | 15.89918798     | 15.83618424  |          |
| 13.89708489                           | 19.89637662                                            | 21.53793456    | 18.78524323     |              |          |
| ENSG00000132182                       | 6.941770054                                            | 7.415609127    | 13.68917783     | 0            |          |
| 0                                     | 0                                                      | 9.348852336    | 0               | 5.718573539  |          |
| 0.005182059                           | 1                                                      | NUP210         | 3               | 13316235     | 13420309 |
| -                                     | 8182                                                   | protein_coding | nucleoporin 210 | [Source:HGNC |          |
| Symbol;Acc:HGNC:30052]                | -                                                      | 6              | 8               | 14           | 0        |
| 0                                     | 0.040103889                                            | 0.043108655    | 0.079263093     | 0            |          |
| 0                                     | 0                                                      |                |                 |              |          |
| ENSG00000059758                       | 1340.918582                                            | 1281.973428    | 891.7521555     |              |          |
| 1641.480815                           | 1840.513793                                            | 1501.259745    | 1171.548055     |              |          |
| 1661.084784                           | -0.504169137                                           | 0.005186196    | 0.037877981     | CDK17        |          |
| 12                                    | 96278261                                               | 96400560       | -               | 6547         |          |
| protein_coding                        | cyclin dependent kinase 17 [Source:HGNC                |                |                 |              |          |
| Symbol;Acc:HGNC:8750]                 | -                                                      | 1159           | 1383            | 912          | 1634     |
| 1530                                  | 9.681347476                                            | 9.313518834    | 6.452900271     | 2014         |          |
| 12.06732273                           | 13.40527486                                            | 10.90925581    |                 |              |          |
| ENSG00000213707                       | 37.02277362                                            | 64.88657986    | 84.09066379     |              |          |
| 9.041203998                           | 26.50193645                                            | 19.62431039    | 62.00000576     |              |          |
| 18.38915028                           | 1.751969991                                            | 0.00518962     | 0.037877981     |              |          |
| HMGB1P10                              | 22                                                     | 26560526       | 26561088        | + 563        |          |
| processed_pseudogene                  | high mobility group box 1 pseudogene                   |                |                 |              |          |
| 10 [Source:HGNC Symbol;Acc:HGNC:4994] | -                                                      | 32             | 70              | 86           |          |
| 9                                     | 29                                                     | 20             | 3.108395676     | 5.481805258  |          |
| 7.076076382                           | 0.772921399                                            | 2.244647768    | 1.65831732      |              |          |
| ENSG00000108578                       | 2346.318278                                            | 2231.171396    | 2094.444207     |              |          |
| 1666.59527                            | 1862.44643                                             | 1552.282952    | 2223.977961     |              |          |
| 1693.774884                           | 0.392611708                                            | 0.005190971    | 0.037877981     | BLMH         |          |
| 17                                    | 30248195                                               | 30292056       | -               | 5127         |          |
| protein_coding                        | bleomycin hydrolase [Source:HGNC Symbol;Acc:HGNC:1059] |                |                 |              |          |
| -                                     | 2028                                                   | 2407           | 2142            | 1659         |          |
| 21.63213308                           | 20.69887447                                            | 19.35345936    | 15.64531405     |              |          |
| 17.32205687                           | 14.40420181                                            |                |                 |              |          |
| ENSG00000187257                       | 1409.179321                                            | 1119.756978    | 1365.006589     |              |          |
| 910.1478692                           | 1049.111139                                            | 864.4508727    | 1297.980963     |              |          |
| 941.236627                            | 0.463000865                                            | 0.005198366    | 0.037911324     | RSBN1L       |          |
| 7                                     | 77696443                                               | 77783022       | + 7206          |              |          |
| protein_coding                        | round spermatid basic protein 1 like [Source:HGNC      |                |                 |              |          |
| Symbol;Acc:HGNC:24765]                | -                                                      | 1218           | 1208            | 1396         |          |
| 881                                   | 9.243740463                                            | 7.391058411    | 8.974156033     | 1148         |          |
| 6.079042174                           | 6.942345573                                            | 5.707260378    |                 |              |          |
| ENSG00000111412                       | 1384.883126                                            | 1305.147206    | 1206.603246     |              |          |
| 1668.604427                           | 2053.443145                                            | 1564.057538    | 1298.877859     |              |          |
| 1762.035036                           | -0.44040482                                            | 0.0052005      | 0.037911324     |              |          |
| C12orf49                              | 12                                                     | 116710185      | 116738070       | - 8664       |          |
| protein_coding                        | chromosome 12 open reading frame 49                    |                |                 |              |          |

|                                          |                                                    |                     |                 |        |
|------------------------------------------|----------------------------------------------------|---------------------|-----------------|--------|
| [Source:HGNC Symbol;Acc:HGNC:26128]      | -                                                  | 1197                | 1408            | 1234   |
| 1661                                     | 2247 1594                                          | 7.555625428         | 7.165032574     |        |
| 6.597800384                              | 9.269416686                                        | 11.30168573         | 8.588472102     |        |
| ENSG00000151611                          | 232.5492968                                        | 279.9392445         | 156.4477466     |        |
| 312.423827                               | 436.8250214                                        | 383.6552681         | 222.9787626     |        |
| 377.6347055                              | -0.760222036                                       | 0.00520425          | 0.037920576     | MMAA   |
| 4                                        | 145599042                                          | 145660035           | + 8882          |        |
| protein_coding                           | methylmalonic aciduria (cobalamin deficiency) cblA |                     |                 |        |
| type [Source:HGNC Symbol;Acc:HGNC:18871] | -                                                  | 201                 | 302             |        |
| 160                                      | 311 478                                            | 391 1.237599147     | 1.499098371     |        |
| 0.834471809                              | 1.692976137                                        | 2.345177536         | 2.055000938     |        |
| ENSG00000134871                          | 3996.145628                                        | 4411.360479         | 11638.73455     |        |
| 2607.885064                              | 1436.587727                                        | 2385.334928         | 6682.080218     |        |
| 2143.26924                               | 1.640521877                                        | 0.005235149         | 0.038127548     | COL4A2 |
| 13                                       | 110305812                                          | 110513209           | + 19293         |        |
| protein_coding                           | collagen type IV alpha 2 chain [Source:HGNC        |                     |                 |        |
| Symbol;Acc:HGNC:2203]                    | -                                                  | 3454 4759           | 11903 2596      | 1572   |
| 2431                                     | 9.790779766                                        | 10.87551667         | 28.57979604     |        |
| 6.505881375                              | 3.550678702                                        | 5.88208411          |                 |        |
| ENSG00000164011                          | 312.3796524                                        | 251.2037592         | 226.8492325     |        |
| 582.6553688                              | 350.0083331                                        | 375.805544          | 263.4775481     |        |
| 436.1564153                              | -0.727980096                                       | 0.005240063         | 0.038145163     | ZNF691 |
| 1                                        | 42846573                                           | 42852477            | + 2036          |        |
| protein_coding                           | zinc finger protein 691 [Source:HGNC               |                     |                 |        |
| Symbol;Acc:HGNC:28028]                   | zf-C2H2                                            | 270 271             | 232 580         | 383    |
| 383                                      | 7.252382533                                        | 5.868477924         | 5.278526024     |        |
| 13.77372591                              | 8.197465509                                        | 8.781466242         |                 |        |
| ENSG00000181163                          | 21006.95315                                        | 18364.756           | 19428.85453     |        |
| 14478.98591                              | 16816.84946                                        | 15322.66155         | 19600.18789     |        |
| 15539.49898                              | 0.334868139                                        | 0.005260587         | 0.038276341     | NPM1   |
| 5                                        | 171387116                                          | 171411137           | + 3828          |        |
| protein_coding                           | nucleophosmin 1 [Source:HGNC Symbol;Acc:HGNC:7910] |                     |                 |        |
| -                                        | 18157 19812                                        | 19870 14413         | 18402 15616     |        |
| 259.3981517                              | 228.1867108                                        | 240.452 182.0470618 | 209.4844038     |        |
| 190.4337445                              |                                                    |                     |                 |        |
| ENSG00000164484                          | 622.4453815                                        | 484.7954467         | 264.9833708     |        |
| 559.5500697                              | 983.3132281                                        | 817.3525277         | 457.4080663     |        |
| 786.7386085                              | -0.783784421                                       | 0.005263799         | 0.038281493     |        |
| TMEM200A                                 | 6 130365734                                        | 130443063           | + 6137          |        |
| protein_coding                           | transmembrane protein 200A [Source:HGNC            |                     |                 |        |
| Symbol;Acc:HGNC:21075]                   | -                                                  | 538 523             | 271 557         | 1076   |
| 833                                      | 4.794252078                                        | 3.757331587         | 2.045576018     |        |
| 4.388340201                              | 7.640376248                                        | 6.336288075         |                 |        |
| ENSG00000121068                          | 260.316377                                         | 403.2237463         | 753.8825789     |        |
| 300.3688884                              | 212.0154916                                        | 245.3038799         | 472.4742341     |        |
| 252.5627533                              | 0.90495711                                         | 0.005295108         | 0.038490877     | TBX2   |
| 17                                       | 61399896                                           | 61409466            | + 6029          |        |
| protein_coding                           | T-box 2 [Source:HGNC Symbol;Acc:HGNC:11597]        |                     |                 | T-box  |
| 225                                      | 435 771                                            | 299 232             | 250 2.040948034 |        |
| 3.181104464                              | 5.92395226                                         | 2.397878209         | 1.67687735      |        |

|                                                  |                                                     |             |             |             |                |
|--------------------------------------------------|-----------------------------------------------------|-------------|-------------|-------------|----------------|
| 1.935712081                                      |                                                     |             |             |             |                |
| ENSG00000172301                                  | 1685.693162                                         | 1860.39094  | 2069.021449 |             |                |
| 1314.992893                                      | 1479.539142                                         | 1435.518305 | 1871.70185  |             |                |
| 1410.01678                                       | 0.408821259                                         | 0.005303181 | 0.038531242 | COPRS       |                |
| 17                                               | 31851864                                            | 31859337    | -           | 1432        |                |
| protein_coding                                   | coordinator of PRMT5 and differentiation stimulator |             |             |             |                |
| [Source:HGNC Symbol;Acc:HGNC:28848]              | -                                                   | 1457        | 2007        | 2116        |                |
| 1309                                             | 1619                                                | 1463        | 55.64309091 | 61.79286229 |                |
| 68.45025986                                      | 44.19751431                                         | 49.26771591 | 47.69219862 |             |                |
| ENSG00000137154                                  | 21083.31262                                         | 24183.22831 | 22234.15819 |             |                |
| 23825.58169                                      | 31772.16636                                         | 33463.37408 | 22500.23304 |             |                |
| 29687.04071                                      | -0.399881967                                        | 0.005309089 | 0.038555843 | RPS6        |                |
| 9                                                | 19375715                                            | 19380254    | -           | 2714        |                |
| protein_coding                                   | ribosomal protein S6 [Source:HGNC                   |             |             |             |                |
| Symbol;Acc:HGNC:10429]                           | -                                                   | 18223       | 26089       | 22739       | 23717          |
| 34104                                            | 367.2017519                                         | 423.8200979 | 388.1181692 |             | 34767          |
| 422.5237511                                      | 558.2335986                                         | 586.5992619 |             |             |                |
| ENSG00000254064                                  | 52.06327541                                         | 35.22414335 | 70.40148596 |             |                |
| 166.7599849                                      | 89.55826799                                         | 110.8773537 | 52.56296824 |             |                |
| 122.3985355                                      | -1.219659085                                        | 0.005313314 | 0.038568203 |             |                |
| AC105206.2                                       | 8                                                   | 22254576    | 22275162    | -           | 515            |
| antisense                                        | uncharacterized LOC100507071 [Source:NCBI           |             |             |             |                |
| gene;Acc:100507071]                              | -                                                   | 45          | 38          | 72          | 166            |
| 113                                              | 4.778592504                                         | 3.253196718 | 6.476311407 |             | 98             |
| 15.58483022                                      | 8.292346564                                         | 10.24276598 |             |             |                |
| ENSG00000198816                                  | 511.3770607                                         | 1001.107232 | 1065.800274 |             |                |
| 1292.892172                                      | 1293.111727                                         | 1426.687365 | 859.4281888 |             |                |
| 1337.563755                                      | -0.636953235                                        | 0.005322607 | 0.038617319 | ZNF358      |                |
| 19                                               | 7515292                                             | 7521026     | +           | 2069        | protein_coding |
| finger protein 358                               | [Source:HGNC Symbol;Acc:HGNC:16838] zf-C2H2         |             |             |             |                |
| 1080                                             | 1090                                                | 1287        | 1415        | 1454        | 442            |
| 23.014271                                        | 24.40441845                                         | 30.07594436 | 29.80262697 |             |                |
| 32.80574854                                      |                                                     |             |             |             |                |
| ENSG00000183935                                  | 74.04554725                                         | 75.08304241 | 136.8917783 |             |                |
| 218.9980524                                      | 180.9442557                                         | 165.8254228 | 95.34012264 |             |                |
| 188.5892436                                      | -0.982341827                                        | 0.005341497 | 0.038735988 | HTR7P1      |                |
| 12                                               | 13000420                                            | 13004830    | +           | 4411        |                |
| transcribed_processed_pseudogene                 | 5-hydroxytryptamine receptor 7                      |             |             |             |                |
| pseudogene 1 [Source:HGNC Symbol;Acc:HGNC:30411] | -                                                   |             |             |             | 64             |
| 81                                               | 140                                                 | 218         | 198         | 169         | 0.793483004    |
| 0.809621288                                      | 1.470257602                                         | 2.389574925 | 1.95608053  |             |                |
| 1.788527749                                      |                                                     |             |             |             |                |
| ENSG00000235944                                  | 141.1493244                                         | 188.1710816 | 186.7594975 |             |                |
| 322.4696093                                      | 254.9669058                                         | 282.5900696 | 172.0266345 |             |                |
| 286.6755282                                      | -0.734441564                                        | 0.005362833 | 0.038872274 |             |                |
| ZNF815P 7                                        | 5823160                                             | 5854365     | +           | 2302        |                |
| transcribed_unprocessed_pseudogene               | "zinc finger protein 815,                           |             |             |             |                |
| pseudogene [Source:HGNC Symbol;Acc:HGNC:22029]"  | -                                                   |             |             |             | 122            |
| 191                                              | 321                                                 | 279         | 288         | 2.89833929  | 3.887985858    |
| 3.843532022                                      | 6.742189107                                         | 5.281502403 | 5.840273751 |             |                |

|                                        |                                              |                                        |                |  |      |
|----------------------------------------|----------------------------------------------|----------------------------------------|----------------|--|------|
| ENSG00000278384                        | 245.2758753                                  | 169.6320588                            | 210.2266595    |  |      |
| 279.2727457                            | 280.5549824                                  | 581.860803                             | 208.3781978    |  |      |
| 380.5628437                            | -0.870046432                                 | 0.005367779                            | 0.038881649    |  |      |
| AL354822.1                             | GL000218.1                                   | 51867 54893                            | - 3027         |  |      |
| protein_coding                         | -                                            | 212 183                                | 215 278        |  | 307  |
| 593                                    | 3.830170903                                  | 2.665462806                            | 3.290246947    |  |      |
| 4.440517556                            | 4.419616154                                  | 9.14509683                             |                |  |      |
| ENSG00000153214                        | 767.065591                                   | 621.9842155                            | 675.6587056    |  |      |
| 451.0556217                            | 486.1734548                                  | 509.2508546                            | 688.2361707    |  |      |
| 482.159977                             | 0.512575161                                  | 0.005369213                            | 0.038881649    |  |      |
| TMEM87B 2                              | 112055223                                    | 112119318                              | + 5367         |  |      |
| protein_coding                         | transmembrane protein 87B [Source:HGNC       |                                        |                |  |      |
| Symbol;Acc:HGNC:25913]                 | -                                            | 663 671                                | 691 449        |  | 532  |
| 519                                    | 6.755797849                                  | 5.512198935                            | 5.964154811    |  |      |
| 4.044976121                            | 4.319551286                                  | 4.514210415                            |                |  |      |
| ENSG00000164970                        | 594.6783013                                  | 696.1403068                            | 673.7031087    |  |      |
| 1074.898698                            | 915.6875972                                  | 794.7845708                            | 654.8405723    |  |      |
| 928.4569552                            | -0.502984524                                 | 0.005379162                            | 0.038935252    |  |      |
| FAM219A 9                              | 34398184                                     | 34458570                               | - 3782         |  |      |
| protein_coding                         | family with sequence similarity 219 member A |                                        |                |  |      |
| [Source:HGNC Symbol;Acc:HGNC:19920]    | -                                            |                                        | 514 751        |  | 689  |
| 1070                                   | 1002 810                                     | 7.432523777                            | 8.7549238      |  |      |
| 8.439178117                            | 13.67928726                                  | 11.54528863                            | 9.997917073    |  |      |
| ENSG00000171051                        | 18.51138681                                  | 68.59438442                            | 20.53376674    |  |      |
| 5.02289111                             | 10.05245865                                  | 0 35.87984599                          | 5.025116587    |  |      |
| 2.830812761                            | 0.00539691                                   | 0.039036806                            | FPR1 19        |  |      |
| 51745172                               | 51804110                                     | - 2594                                 | protein_coding |  |      |
| formyl peptide receptor 1 [Source:HGNC |                                              |                                        |                |  |      |
| Symbol;Acc:HGNC:3826]                  | -                                            | 16 74                                  | 21 5 11 0      |  |      |
| 0.337322044                            | 1.257753996                                  | 0.375017711                            | 0.093196853    |  |      |
| 0.184791211                            | 0                                            |                                        |                |  |      |
| ENSG00000213693                        | 54.37719876                                  | 132.5540131                            | 72.3570828     |  |      |
| 183.8378146                            | 168.1502174                                  | 186.4309487                            | 86.42943157    |  |      |
| 179.4729936                            | -1.049154236                                 | 0.0053983                              | 0.039036806    |  |      |
| SEC14L1P1                              | 11 43897456                                  | 43899636                               | + 2181         |  |      |
| processed_pseudogene                   |                                              | SEC14 like 1 pseudogene 1 [Source:HGNC |                |  |      |
| Symbol;Acc:HGNC:44189]                 | -                                            | 47 143                                 | 74 183         |  | 184  |
| 190                                    | 1.178519859                                  | 2.890775264                            | 1.571732053    |  |      |
| 4.056921839                            | 3.67638305                                   | 4.066717187                            |                |  |      |
| ENSG00000136807                        | 1034.323738                                  | 1154.981121                            | 1046.244305    |  |      |
| 1349.148552                            | 1569.09741                                   | 1401.175762                            | 1078.516388    |  |      |
| 1439.807241                            | -0.416685511                                 | 0.005401007                            | 0.03903792     |  | CDK9 |
| 9                                      | 127785679                                    | 127790787                              | + 3000         |  |      |
| protein_coding                         | cyclin dependent kinase 9 [Source:HGNC       |                                        |                |  |      |
| Symbol;Acc:HGNC:1780]                  | -                                            | 894 1246                               | 1070 1343      |  | 1717 |
| 1428                                   | 16.29712426                                  | 18.31178774                            | 16.52208982    |  |      |
| 21.64491947                            | 24.94064256                                  | 22.2204571                             |                |  |      |
| ENSG00000254272                        | 13.88354011                                  | 9.269511408                            | 4.888992081    |  | 0    |
| 0                                      | 0 9.347347866                                | 0                                      | 5.715325467    |  |      |
| 0.005401473                            | 1 AC087854.1                                 | 8                                      | 22492631       |  |      |

|                                                |   |                                                   |                      |                |                |             |
|------------------------------------------------|---|---------------------------------------------------|----------------------|----------------|----------------|-------------|
| 22493044                                       | + | 414                                               | processed_pseudogene | basic          |                |             |
| transcription factor 3-like (BTF3L) pseudogene | - |                                                   |                      | 12             | 10             |             |
| 5                                              | 0 | 0                                                 | 0                    | 1.585169172    | 1.064960787    |             |
| 0.559463965                                    |   | 0                                                 | 0                    | 0              |                |             |
| ENSG00000102870                                |   | 490.5517505                                       | 597.8834858          | 792.0167171    |                |             |
| 846.8594412                                    |   | 912.9460175                                       | 1020.46414           | 626.8173178    |                |             |
| 926.756533                                     |   | -0.563228631                                      | 0.005409167          | 0.039076658    |                | ZNF629      |
| 16                                             |   | 30778449                                          | 30787202             | -              | 6087           |             |
| protein_coding                                 |   | zinc finger protein 629 [Source:HGNC              |                      |                |                |             |
| Symbol;Acc:HGNC:29008]                         |   | zf-C2H2                                           | 424                  | 645            | 810            | 843         |
| 1040                                           |   | 3.809406053                                       | 4.671865926          | 6.164305769    |                | 999         |
| 6.696154867                                    |   | 7.151889309                                       | 7.975833392          |                |                |             |
| ENSG00000155329                                |   | 410.7213949                                       | 383.7577723          | 302.1397106    |                |             |
| 169.7737195                                    |   | 275.0718231                                       | 215.8674143          | 365.5396259    |                |             |
| 220.2376523                                    |   | 0.72948123                                        | 0.005411479          | 0.039076658    |                |             |
| ZCCHC10                                        | 5 | 132996985                                         | 133026604            | -              | 2559           |             |
| protein_coding                                 |   | zinc finger CCHC-type containing 10 [Source:HGNC  |                      |                |                |             |
| Symbol;Acc:HGNC:25954]                         |   | -                                                 | 355                  | 414            | 309            | 169         |
| 220                                            |   | 7.586697707                                       | 7.132865144          | 5.593590246    |                | 301         |
| 3.193137611                                    |   | 5.125719161                                       | 4.013270481          |                |                |             |
| ENSG00000164237                                |   | 212.8809483                                       | 199.2944953          | 166.2257307    |                |             |
| 322.4696093                                    |   | 329.9034157                                       | 279.646423           | 192.8003915    |                |             |
| 310.6731494                                    |   | -0.68932803                                       | 0.00541959           | 0.03911675     |                | CMBL        |
| 5                                              |   | 10275875                                          | 10308026             | -              | 3324           |             |
| protein_coding                                 |   | carboxymethylenebutenolidase homolog [Source:HGNC |                      |                |                |             |
| Symbol;Acc:HGNC:25090]                         |   | -                                                 | 184                  | 215            | 170            | 321         |
| 285                                            |   | 3.027272534                                       | 2.851749688          | 2.369138018    |                | 361         |
| 4.66922964                                     |   | 4.732654325                                       | 4.002486546          |                |                |             |
| ENSG00000083817                                |   | 195.5265232                                       | 189.0980327          | 164.2701339    |                |             |
| 240.0941951                                    |   | 380.165709                                        | 300.251949           | 182.9648966    |                |             |
| 306.8372843                                    |   | -0.747076876                                      | 0.005428964          | 0.039165912    |                | ZNF416      |
| 19                                             |   | 57571566                                          | 57578927             | -              | 2561           |             |
| protein_coding                                 |   | zinc finger protein 416 [Source:HGNC              |                      |                |                |             |
| Symbol;Acc:HGNC:20645]                         |   | zf-C2H2                                           | 169                  | 204            | 168            | 239         |
| 306                                            |   | 3.608874993                                       | 3.512000321          | 3.038800289    |                | 416         |
| 4.512212445                                    |   | 7.078518149                                       | 5.577735089          |                |                |             |
| ENSG00000243789                                |   | 40.49365865                                       | 5.561706845          | 4.888992081    |                | 0           |
| 0                                              |   | 1.962431039                                       | 16.98145253          | 0.65414368     |                |             |
| 4.704601617                                    |   | 0.005434743                                       | 1                    | JMJD7          | 15             | 41828085    |
| 41837581                                       |   | +                                                 | 1971                 | protein_coding | jumonji domain |             |
| containing 7 [Source:HGNC                      |   | Symbol;Acc:HGNC:34397]                            |                      | -              |                | 35          |
| 6                                              |   | 5                                                 | 0                    | 2              | 0.971127232    |             |
| 0.134214236                                    |   | 0.117512979                                       | 0                    | 0              | 0.047368475    |             |
| ENSG00000233429                                |   | 115.6961676                                       | 62.10572644          | 122.224802     |                |             |
| 20.09156444                                    |   | 36.5543951                                        | 55.92928461          | 100.0088987    |                |             |
| 37.52508138                                    |   | 1.412324614                                       | 0.005444719          | 0.039261044    |                |             |
| HOTAIRM1                                       |   | 7                                                 | 27095647             | 27100265       | +              | 1496        |
| antisense                                      |   | "HOXA transcript antisense RNA, myeloid-          |                      |                |                |             |
| specific 1 [Source:HGNC                        |   | Symbol;Acc:HGNC:37117]"                           |                      | -              | 100            | 67          |
| 125                                            |   | 20                                                | 40                   | 57             | 3.655637462    | 1.974591063 |

|                                     |                                                                                                            |             |             |             |      |
|-------------------------------------|------------------------------------------------------------------------------------------------------------|-------------|-------------|-------------|------|
|                                     | 3.870623021                                                                                                | 0.646397426 | 1.165163833 | 1.778645091 |      |
| ENSG0000081026                      | 726.5719323                                                                                                | 561.7323914 | 710.8594485 |             |      |
| 386.7626155                         | 495.3120536                                                                                                | 475.8895269 | 666.3879241 |             |      |
| 452.654732                          | 0.556988512                                                                                                | 0.005455519 | 0.039320379 | MAGI3       |      |
| 1                                   | 113390749                                                                                                  | 113685923   | +           | 8180        |      |
| protein_coding                      | "membrane associated guanylate kinase, WW and PDZ domain containing 3 [Source:HGNC Symbol;Acc:HGNC:29647]" |             |             |             | -    |
| 628                                 | 606                                                                                                        | 727         | 385         | 542         | 485  |
| 3.266278998                         | 4.117025557                                                                                                | 2.275666636 | 2.887384233 |             |      |
| 2.767798507                         |                                                                                                            |             |             |             |      |
| ENSG00000261008                     | 37.02277362                                                                                                | 36.15109449 | 43.02313031 |             |      |
| 9.041203998                         | 10.96631853                                                                                                | 9.812155195 | 38.73233281 |             |      |
| 9.939892574                         | 1.961288359                                                                                                | 0.005465044 | 0.039370468 |             |      |
| LINC01572                           | 16                                                                                                         | 72283301    | 72665009    | -           | 4752 |
| lincRNA                             | long intergenic non-protein coding RNA 1572                                                                |             |             |             |      |
| [Source:HGNC Symbol;Acc:HGNC:51385] | -                                                                                                          | 32          | 39          |             | 44   |
| 9                                   | 12                                                                                                         | 10          | 0.368271626 | 0.361844631 |      |
| 0.428922373                         | 0.091572969                                                                                                | 0.110043251 | 0.098235759 |             |      |
| ENSG0000035928                      | 2060.548744                                                                                                | 2002.214464 | 1909.640307 |             |      |
| 1591.251904                         | 1509.696517                                                                                                | 1521.865271 | 1990.801172 |             |      |
| 1540.937897                         | 0.369478745                                                                                                | 0.005471428 | 0.039397886 | RFC1        |      |
| 4                                   | 39287456                                                                                                   | 39366375    | -           | 6719        |      |
| protein_coding                      | replication factor C subunit 1 [Source:HGNC Symbol;Acc:HGNC:9969]                                          |             |             |             |      |
| 1551                                | 14.49619396                                                                                                | 14.17369451 | 13.46480468 | 1652        |      |
| 11.39860627                         | 10.71430487                                                                                                | 10.77589107 |             |             |      |
| ENSG00000111276                     | 550.7137576                                                                                                | 659.9892123 | 679.5698992 |             |      |
| 412.8816493                         | 480.6902955                                                                                                | 410.1480871 | 630.0909564 |             |      |
| 434.573344                          | 0.536335142                                                                                                | 0.00547591  | 0.039411599 | CDKN1B      |      |
| 12                                  | 12715058                                                                                                   | 12722371    | +           | 2811        |      |
| protein_coding                      | cyclin dependent kinase inhibitor 1B [Source:HGNC Symbol;Acc:HGNC:1785]                                    |             |             |             |      |
| 418                                 | 9.260636123                                                                                                | 11.16742658 | 11.45318867 | 526         |      |
| 7.069394094                         | 8.154240124                                                                                                | 6.94163017  |             |             |      |
| ENSG0000090863                      | 3091.401598                                                                                                | 2320.158706 | 4143.909688 |             |      |
| 2487.335678                         | 1689.726913                                                                                                | 2302.912824 | 3185.156664 |             |      |
| 2159.991805                         | 0.560431989                                                                                                | 0.005478568 | 0.03941217  | GLG1        |      |
| 16                                  | 74447427                                                                                                   | 74607144    | -           | 14111       |      |
| protein_coding                      | golgi glycoprotein 1 [Source:HGNC Symbol;Acc:HGNC:4316]                                                    |             |             |             |      |
| 2347                                | 10.35555488                                                                                                | 7.820544935 | 13.91251406 | 1849        |      |
| 8.483871169                         | 5.710021152                                                                                                | 7.764282589 |             |             |      |
| ENSG00000205726                     | 1153.490791                                                                                                | 1178.1549   | 1216.38123  |             |      |
| 934.2577465                         | 867.2530237                                                                                                | 860.5260106 | 1182.67564  |             |      |
| 887.3455936                         | 0.414685898                                                                                                | 0.005481373 | 0.039413808 | ITSN1       |      |
| 21                                  | 33642400                                                                                                   | 33899861    | +           | 21748       |      |
| protein_coding                      | intersectin 1 [Source:HGNC Symbol;Acc:HGNC:6183]                                                           |             |             |             |      |
| -                                   | 997                                                                                                        | 1271        | 1244        | 930         | 949  |
| 2.507093591                         | 2.576678206                                                                                                | 2.649741525 | 2.067591989 |             |      |
| 1.901540089                         | 1.882462376                                                                                                |             |             |             |      |

|                                    |                                                  |             |             |        |
|------------------------------------|--------------------------------------------------|-------------|-------------|--------|
| ENSG00000259207                    | 109.9113592                                      | 88.06035838 | 129.0693909 |        |
| 45.20601999                        | 31.98509571                                      | 63.77900877 | 109.0137028 |        |
| 46.99004149                        | 1.215184922                                      | 0.005484672 | 0.039418982 | ITGB3  |
| 17                                 | 47253846                                         | 47311816    | + 4394      |        |
| protein_coding                     | integrin subunit beta 3 [Source:HGNC             |             |             |        |
| Symbol;Acc:HGNC:6156]              | -                                                | 95 95       | 132 45      | 35     |
| 65                                 | 1.182383241                                      | 0.95322958  | 1.391606134 |        |
| 0.495169262                        | 0.347109572                                      | 0.690556695 |             |        |
| ENSG00000101773                    | 2103.356326                                      | 1608.260229 | 1538.076909 |        |
| 1142.205438                        | 1414.65509                                       | 1233.387908 | 1749.897821 |        |
| 1263.416146                        | 0.469211432                                      | 0.00550803  | 0.039551541 | RBBP8  |
| 18                                 | 22798261                                         | 23026488    | + 5091      |        |
| protein_coding                     | "RB binding protein 8, endonuclease [Source:HGNC |             |             |        |
| Symbol;Acc:HGNC:9891]"             | -                                                | 1818 1735   | 1573 1137   | 1548   |
| 1257                               | 19.52924683                                      | 15.02554869 | 14.31291465 |        |
| 10.79837945                        | 13.25032275                                      | 11.52598942 |             |        |
| ENSG00000141551                    | 1970.305734                                      | 2901.357071 | 2942.195434 |        |
| 3843.516277                        | 3195.767991                                      | 3764.923948 | 2604.619413 |        |
| 3601.402739                        | -0.466981109                                     | 0.00550829  | 0.039551541 | CSNK1D |
| 17                                 | 82239023                                         | 82273731    | - 11024     |        |
| protein_coding                     | casein kinase 1 delta [Source:HGNC               |             |             |        |
| Symbol;Acc:HGNC:2452]              | -                                                | 1703 3130   | 3009 3826   | 3497   |
| 3837                               | 8.448316123                                      | 12.51811944 | 12.64402771 |        |
| 16.78058039                        | 13.82340479                                      | 16.24795211 |             |        |
| ENSG00000133639                    | 1874.277915                                      | 1616.60279  | 1131.312767 |        |
| 2253.268952                        | 2421.728675                                      | 1928.088496 | 1540.731157 |        |
| 2201.028708                        | -0.51507077                                      | 0.005522128 | 0.039632285 | BTG1   |
| 12                                 | 92140278                                         | 92145897    | - 4854      |        |
| protein_coding                     | BTG anti-proliferation factor 1 [Source:HGNC     |             |             |        |
| Symbol;Acc:HGNC:1130]              | -                                                | 1620 1744   | 1157 2243   | 2650   |
| 1965                               | 18.25197878                                      | 15.8409297  | 11.04170253 |        |
| 22.34244606                        | 23.79056191                                      | 18.89769427 |             |        |
| ENSG0000014164                     | 468.5694787                                      | 830.5482222 | 780.2831361 |        |
| 942.2943723                        | 1022.609203                                      | 1191.195641 | 693.1336123 |        |
| 1052.033072                        | -0.600599346                                     | 0.005524938 | 0.03963385  | ZC3H3  |
| 8                                  | 143437655                                        | 143541453   | - 3731      |        |
| protein_coding                     | zinc finger CCCH-type containing 3 [Source:HGNC  |             |             |        |
| Symbol;Acc:HGNC:28972]             | -                                                | 405 896     | 798 938     | 1119   |
| 1214                               | 5.936418187                                      | 10.58806792 | 9.907865403 |        |
| 12.15566732                        | 13.06963428                                      | 15.18935994 |             |        |
| ENSG00000075275                    | 657.1542318                                      | 627.5459224 | 1050.155499 |        |
| 530.4173012                        | 429.5141424                                      | 548.4994754 | 778.2852177 |        |
| 502.8103063                        | 0.630866441                                      | 0.005542058 | 0.03973801  | CELSR1 |
| 22                                 | 46360834                                         | 46537170    | - 12806     |        |
| protein_coding                     | cadherin EGF LAG seven-pass G-type receptor 1    |             |             |        |
| [Source:HGNC Symbol;Acc:HGNC:1850] | -                                                |             | 568 677     | 1074   |
| 528                                | 470 559                                          | 2.425657902 | 2.33082211  |        |
| 3.885019828                        | 1.993524794                                      | 1.599347951 | 2.037719241 |        |
| ENSG00000115568                    | 736.9845874                                      | 859.2837076 | 883.9297682 |        |
| 1359.194334                        | 986.0548077                                      | 1138.210003 | 826.7326877 |        |



|                          |                                                    |                |                |                     |
|--------------------------|----------------------------------------------------|----------------|----------------|---------------------|
| 1161.153048              | -0.489252721                                       | 0.005546105    | 0.039748389    | ZNF142              |
| 2                        | 218637916                                          | 218659655      | - 6994         |                     |
| protein_coding           | zinc finger protein 142 [Source:HGNC               |                |                |                     |
| Symbol;Acc:HGNC:12927]   | zf-C2H2                                            | 637 927        | 904 1353       | 1079                |
| 1160                     | 4.980907965                                        | 5.843702043    | 5.987496304    |                     |
| 9.353483514              | 6.722865372                                        | 7.74244978     |                |                     |
| ENSG00000101298          | 122.6379376                                        | 138.11572      | 136.8917783    |                     |
| 269.2269635              | 213.8432113                                        | 203.1116125    | 132.5484786    |                     |
| 228.7272624              | -0.785852673                                       | 0.005556408    | 0.039803566    | SNPH                |
| 20                       | 1266280                                            | 1309328 + 5709 | protein_coding |                     |
| syntaphilin [Source:HGNC | Symbol;Acc:HGNC:15931]                             |                |                | - 106 149           |
| 140                      | 268 234                                            | 207            | 1.015407893    | 1.150694887         |
| 1.135979381              | 2.269739248                                        | 1.786135541    | 1.692607802    |                     |
| ENSG00000131791          | 973.0047693                                        | 720.2410364    | 697.1702707    |                     |
| 561.5592261              | 551.0575061                                        | 542.6121823    | 796.8053588    |                     |
| 551.7429715              | 0.529217884                                        | 0.005573945    | 0.039910494    | PRKAB2              |
| 1                        | 147155106                                          | 147172550      | - 5460         |                     |
| protein_coding           | protein kinase AMP-activated non-catalytic subunit |                |                |                     |
| beta 2 [Source:HGNC      | Symbol;Acc:HGNC:9379]                              |                |                | - 841 777           |
| 713                      | 559 603                                            | 553            | 8.423606399    | 6.274257436         |
| 6.049219493              | 4.950173053                                        | 4.81263879     | 4.728011502    |                     |
| ENSG00000141456          | 2091.78671                                         | 2733.578914    | 2544.231479    |                     |
| 3893.745189              | 2849.415098                                        | 3268.428895    | 2456.532368    |                     |
| 3337.196394              | -0.441560653                                       | 0.005587782    | 0.039990838    | PELP1               |
| 17                       | 4669774                                            | 4704337 - 6577 |                |                     |
| protein_coding           | "proline, glutamate and leucine rich protein 1     |                |                |                     |
| [Source:HGNC             | Symbol;Acc:HGNC:30134]"                            |                |                | - 1808 2949 2602    |
| 3876                     | 3118 3331                                          | 15.03367983    | 19.76882645    |                     |
| 18.32660022              | 28.49424427                                        | 20.65888446    | 23.64246891    |                     |
| ENSG00000006062          | 521.7897157                                        | 977.0065025    | 1260.382158    |                     |
| 691.1498168              | 424.0309831                                        | 517.1005788    | 919.7261255    |                     |
| 544.0937929              | 0.758477069                                        | 0.00559769     | 0.040043       |                     |
| MAP3K14 17               | 45263119                                           | 45317145       | - 5784         |                     |
| protein_coding           | mitogen-activated protein kinase kinase kinase 14  |                |                |                     |
| [Source:HGNC             | Symbol;Acc:HGNC:6853]                              |                |                | - 451 1054 1289     |
| 688                      | 464 527                                            | 4.264253065    | 8.034267447    |                     |
| 10.32350301              | 5.751238402                                        | 3.495813813    | 4.253323022    |                     |
| ENSG00000181544          | 268.4151088                                        | 228.0299806    | 243.4718056    |                     |
| 165.7554066              | 118.8017841                                        | 150.1259745    | 246.638965     |                     |
| 144.8943884              | 0.767603163                                        | 0.005612211    | 0.040128099    | FANCB               |
| X                        | 14835961                                           | 14873069       | - 3593         |                     |
| protein_coding           | FA complementation group B [Source:HGNC            |                |                |                     |
| Symbol;Acc:HGNC:3583]    | -                                                  |                |                | 232 246 249 165 130 |
| 153                      | 3.531225731                                        | 3.018643651    | 3.210292363    |                     |
| 2.220383255              | 1.576684263                                        | 1.987834618    |                |                     |
| ENSG00000154473          | 4330.507552                                        | 3864.459306    | 4031.46287     |                     |
| 3022.77587               | 3152.816577                                        | 3419.536085    | 4075.476576    |                     |
| 3198.376178              | 0.349482358                                        | 0.005621312    | 0.040174377    | BUB3                |
| 10                       | 123154277                                          | 123170467      | + 8300         |                     |
| protein_coding           | "BUB3, mitotic checkpoint protein [Source:HGNC     |                |                |                     |

|                          |                                                   |             |             |                |        |
|--------------------------|---------------------------------------------------|-------------|-------------|----------------|--------|
| Symbol;Acc:HGNC:1151]" - | 3743                                              | 4169        | 4123        | 3009           | 3450   |
| 3485                     | 24.66246304                                       | 22.14561578 | 23.01111687 |                |        |
| 17.52852256              | 18.11338426                                       | 19.60066138 |             |                |        |
| ENSG00000144560          | 1367.528701                                       | 1501.660848 | 1477.453407 |                |        |
| 1774.08514               | 2072.634202                                       | 1854.497332 | 1448.880985 |                |        |
| 1900.405558              | -0.391231947                                      | 0.005633272 | 0.040241043 |                | VGLL4  |
| 3                        | 11556070                                          | 11771350    | -           | 7236           |        |
| protein_coding           | vestigial like family member 4                    |             |             |                |        |
| [Source:HGNC             |                                                   |             |             |                |        |
| Symbol;Acc:HGNC:28966] - | 1182                                              | 1620        | 1511        | 1766           | 2268   |
| 1890                     | 8.933335221                                       | 9.87075595  | 9.673159791 |                |        |
| 11.8003084               | 13.6585026                                        | 12.19296373 |             |                |        |
| ENSG00000175471          | 575.0099528                                       | 538.5586128 | 564.1896861 |                |        |
| 450.0510435              | 369.1993905                                       | 254.1348195 | 559.2527506 |                |        |
| 357.7950845              | 0.644343496                                       | 0.0056394   | 0.040265999 |                | MCTP1  |
| 5                        | 94703741                                          | 95284575    | -           | 12089          |        |
| protein_coding           | multiple C2 and transmembrane domain containing 1 |             |             |                |        |
| [Source:HGNC             |                                                   |             |             |                |        |
| Symbol;Acc:HGNC:26183]   | -                                                 | 497         | 581         | 577            |        |
| 448                      | 404                                               | 259         | 2.248333461 | 2.11894514     |        |
| 2.210995667              | 1.791797197                                       | 1.456295761 | 1.000127623 |                |        |
| ENSG00000139291          | 671.0377719                                       | 561.7323914 | 644.3691563 |                |        |
| 416.8999621              | 486.1734548                                       | 390.5237767 | 625.7131065 |                |        |
| 431.1990646              | 0.536243162                                       | 0.005651365 | 0.040332594 |                | TMEM19 |
| 12                       | 71686087                                          | 71705046    | +           | 6488           |        |
| protein_coding           | transmembrane protein 19                          |             |             |                |        |
| [Source:HGNC             |                                                   |             |             |                |        |
| Symbol;Acc:HGNC:25605]   | -                                                 | 580         | 606         | 659            | 415    |
| 398                      | 4.888908004                                       | 4.118089119 | 4.705188525 |                | 532    |
| 3.092704826              | 3.573216978                                       | 2.863638988 |             |                |        |
| ENSG00000115963          | 3333.206588                                       | 3748.590414 | 1577.188845 |                |        |
| 5348.374454              | 8052.01938                                        | 5156.287555 | 2886.328616 |                |        |
| 6185.560463              | -1.099703867                                      | 0.005665433 | 0.040414128 |                | RND3   |
| 2                        | 150468195                                         | 150539011   | -           | 3594           |        |
| protein_coding           | Rho family GTPase 3                               |             |             |                |        |
| [Source:HGNC             |                                                   |             |             |                |        |
| Symbol;Acc:HGNC:671]     | 2881                                              | 4044        | 1613        | 5324           | 8811   |
| 43.83892523              | 49.60974927                                       | 20.79020398 | 71.62443193 |                |        |
| 106.8330743              | 68.25597637                                       |             |             |                |        |
| ENSG00000268902          | 3.470885027                                       | 0           | 9.777984162 | 19.08698622    |        |
| 10.05245865              | 79.47845708                                       | 4.41628973  | 36.20596732 |                |        |
| -3.036344894             | 0.005671599                                       | 0.04043924  | CSAG2       | X              |        |
| 152708261                | 152714549                                         | -           | 1083        | protein_coding |        |
| CSAG                     | family member 2                                   |             |             |                |        |
| [Source:HGNC             |                                                   |             |             |                |        |
| Symbol;Acc:HGNC:16847]   | -                                                 | 3           | 0           | 10             | 19     |
| 0.151491237              | 0                                                 | 0.427734223 | 0.848254868 | 0.442611635    |        |
| 3.491424042              |                                                   |             |             |                |        |
| ENSG00000144597          | 1014.65539                                        | 1167.958437 | 920.1083096 |                |        |
| 1432.528545              | 1560.872671                                       | 1254.974649 | 1034.240712 |                |        |
| 1416.125288              | -0.453255974                                      | 0.005681052 | 0.040487758 |                | EAF1   |
| 3                        | 15427355                                          | 15450635    | +           | 5152           |        |
| protein_coding           | ELL associated factor 1                           |             |             |                |        |
| [Source:HGNC             |                                                   |             |             |                |        |
| Symbol;Acc:HGNC:20907]   | -                                                 | 877         | 1260        | 941            | 1426   |
| 1279                     | 9.309330561                                       | 10.78272797 | 8.46089343  |                | 1708   |

|                                     |                                                                                              |                |               |                |          |
|-------------------------------------|----------------------------------------------------------------------------------------------|----------------|---------------|----------------|----------|
| 13.38273529                         | 14.44676505                                                                                  | 11.58886026    |               |                |          |
| ENSG00000172339                     | 233.7062585                                                                                  | 183.5363259    | 264.0055724   |                |          |
| 110.5036044                         | 159.9254785                                                                                  | 105.9712761    | 227.0827189   |                |          |
| 125.4667864                         | 0.854278425                                                                                  | 0.005712682    | 0.040694209   | ALG14          |          |
| 1                                   | 94974407                                                                                     | 95072945       | -             | 9633           |          |
| protein_coding                      | "ALG14, UDP-N-acetylglucosaminyltransferase subunit [Source:HGNC Symbol;Acc:HGNC:28287]"     |                |               |                |          |
|                                     |                                                                                              |                | 202           | 198            | 270      |
| 110                                 | 175                                                                                          | 108            | 1.146791649   | 0.906228232    |          |
| 1.298388498                         | 0.552118553                                                                                  | 0.791653409    | 0.523369284   |                |          |
| ENSG00000167895                     | 5.784808379                                                                                  | 5.561706845    | 16.62257307   | 0              |          |
| 0                                   | 0                                                                                            | 9.323029433    | 0             | 5.714838671    |          |
| 0.005730769                         | 1                                                                                            | TMC8           | 17            | 78130770       | 78142968 |
| +                                   | 5459                                                                                         | protein_coding | transmembrane | channel like 8 |          |
| [Source:HGNC Symbol;Acc:HGNC:20474] |                                                                                              |                | -             | 5              | 6        |
| 0                                   | 0                                                                                            | 0              | 0.050090068   | 0.04845874     | 17       |
| 0.144257461                         | 0                                                                                            | 0              | 0             |                |          |
| ENSG00000103599                     | 109.9113592                                                                                  | 95.47596751    | 87.02405904   |                |          |
| 196.8973315                         | 131.5958223                                                                                  | 228.623216     | 97.47046191   |                |          |
| 185.7054566                         | -0.930674042                                                                                 | 0.005747863    | 0.0408929     | IQCH           |          |
| 15                                  | 67254800                                                                                     | 67502260       | +             | 7108           |          |
| protein_coding                      | IQ motif containing H [Source:HGNC Symbol;Acc:HGNC:25721]                                    |                |               |                |          |
|                                     |                                                                                              | 95             | 103           | 89             | 196      |
| 233                                 | 0.730921773                                                                                  | 0.638886577    | 0.58002277    |                | 144      |
| 1.333244709                         | 0.882823064                                                                                  | 1.530222339    |               |                |          |
| ENSG00000249839                     | 24.29619519                                                                                  | 28.73548537    | 15.64477466   |                |          |
| 1.004578222                         | 1.827719755                                                                                  | 5.887293117    | 22.89215174   |                |          |
| 2.906530365                         | 2.97928433                                                                                   | 0.005748245    | 0.0408929     |                |          |
| AC011330.1                          | 15                                                                                           | 43663654       | 43684339      | -              | 3235     |
|                                     | unprocessed_pseudogene histidine acid phosphatase domain containing 2A (HISPPD2A) pseudogene |                |               |                |          |
|                                     |                                                                                              |                | -             | 21             | 31       |
| 1                                   | 2                                                                                            | 6              | 0.355009294   | 0.422494799    | 16       |
| 0.229112167                         | 0.014946067                                                                                  | 0.026941037    | 0.08658108    |                |          |
| ENSG00000072682                     | 389.8960847                                                                                  | 291.9896094    | 483.0324176   |                |          |
| 265.2086506                         | 163.5809181                                                                                  | 256.0972506    | 388.3060372   |                |          |
| 228.2956064                         | 0.766843966                                                                                  | 0.0057486      | 0.0408929     | P4HA2          |          |
| 5                                   | 132191838                                                                                    | 132295315      | -             | 8502           |          |
| protein_coding                      | prolyl 4-hydroxylase subunit alpha 2 [Source:HGNC Symbol;Acc:HGNC:8547]                      |                |               |                |          |
|                                     |                                                                                              | 337            | 315           | 494            | 264      |
| 261                                 | 2.167721639                                                                                  | 1.633516069    | 2.691586269   |                | 179      |
| 1.50135724                          | 0.91746716                                                                                   | 1.433063526    |               |                |          |
| ENSG00000123119                     | 252.2176453                                                                                  | 195.5866907    | 256.183185    |                |          |
| 123.5631213                         | 125.1988032                                                                                  | 157.9756986    | 234.662507    |                |          |
| 135.5792077                         | 0.790857434                                                                                  | 0.005757131    | 0.040930483   | NECAB1         |          |
| 8                                   | 90791550                                                                                     | 90959408       | +             | 6408           |          |
| protein_coding                      | N-terminal EF-hand calcium binding protein 1 [Source:HGNC Symbol;Acc:HGNC:20983]             |                |               |                |          |
|                                     |                                                                                              |                | -             | 218            | 211      |
| 123                                 | 137                                                                                          | 161            | 1.86049584    | 1.451756938    | 262      |
| 1.894005536                         | 0.928076604                                                                                  | 0.93165831     | 1.172868733   |                |          |
| ENSG00000236104                     | 253.374607                                                                                   | 410.6393554    | 496.7215954   |                |          |
| 500.2799546                         | 685.3949081                                                                                  | 703.5315275    | 386.9118526   |                |          |

|                                                                |                                                       |             |                 |        |
|----------------------------------------------------------------|-------------------------------------------------------|-------------|-----------------|--------|
| 629.7354634                                                    | -0.70121416                                           | 0.005759238 | 0.040930483     | ZBTB22 |
| 6                                                              | 33314406                                              | 33317942    | - 2728          |        |
| protein_coding                                                 | zinc finger and BTB domain containing 22 [Source:HGNC |             |                 |        |
| Symbol;Acc:HGNC:13085]                                         | -                                                     | 219 443     | 508 498         | 750    |
| 717                                                            | 4.390302668                                           | 7.159675156 | 8.626245266     |        |
| 8.826452599                                                    | 11.98051522                                           | 12.26932938 |                 |        |
| ENSG00000176396                                                | 657.1542318                                           | 789.762372  | 650.2359467     |        |
| 916.1753385                                                    | 1116.73677                                            | 905.6619245 | 699.0508502     |        |
| 979.5246777                                                    | -0.486400624                                          | 0.005774285 | 0.041009034     | EID2   |
| 19                                                             | 39538705                                              | 39540333    | - 1629          |        |
| protein_coding                                                 | EP300 interacting inhibitor of differentiation 2      |             |                 |        |
| [Source:HGNC Symbol;Acc:HGNC:28292]                            | -                                                     | 568         | 852             | 665    |
| 912                                                            | 1222 923                                              | 19.06873855 | 23.05963711     |        |
| 18.91050021                                                    | 27.06917193                                           | 32.68953323 | 26.45005945     |        |
| ENSG00000172572                                                | 183.9569064                                           | 64.88657986 | 115.3802131     |        |
| 63.28842799                                                    | 52.09001301                                           | 22.56795695 | 121.4078998     |        |
| 45.98213265                                                    | 1.398129219                                           | 0.00577776  | 0.041009034     | PDE3A  |
| 12                                                             | 20369245                                              | 20684381    | + 8398          |        |
| protein_coding                                                 | phosphodiesterase 3A [Source:HGNC                     |             |                 |        |
| Symbol;Acc:HGNC:8778]                                          | -                                                     | 159 70      | 118 63          | 57     |
| 23                                                             | 1.035418611                                           | 0.367498971 | 0.650891489     |        |
| 0.362715317                                                    | 0.295772358                                           | 0.127849196 |                 |        |
| ENSG00000143167                                                | 10.41265508                                           | 25.95463194 | 35.20074298     |        |
| 6.027469332                                                    | 0 0                                                   | 23.85601    | 2.009156444     |        |
| 3.59112016                                                     | 0.005778338                                           | 0.041009034 | GPA33 1         |        |
| 167052836                                                      | 167166479                                             | - 3200      | protein_coding  |        |
| glycoprotein A33 [Source:HGNC Symbol;Acc:HGNC:4445]            | -                                                     |             |                 | 9      |
| 28                                                             | 36 6                                                  | 0 0         | 0.153810946     |        |
| 0.385782045                                                    | 0.521140684                                           | 0.090657239 | 0 0             |        |
| ENSG00000099377                                                | 264.9442237                                           | 185.3902282 | 116.3580115     |        |
| 315.4375617                                                    | 341.7835942                                           | 345.3878629 | 188.8974878     |        |
| 334.2030062                                                    | -0.825999283                                          | 0.005789535 | 0.041069432     | HSD3B7 |
| 16                                                             | 30985207                                              | 30989152    | + 2495          |        |
| protein_coding                                                 | "hydroxy-delta-5-steroid dehydrogenase, 3 beta- and   |             |                 |        |
| steroid delta-isomerase 7 [Source:HGNC Symbol;Acc:HGNC:18324]" | -                                                     |             |                 |        |
| 229                                                            | 200 119                                               | 314 374     | 352 5.019490598 |        |
| 3.534218563                                                    | 2.209422982                                           | 6.084996246 | 6.532202657     |        |
| 6.585945755                                                    |                                                       |             |                 |        |
| ENSG00000138698                                                | 1293.483153                                           | 903.7773623 | 931.8418906     |        |
| 701.195599                                                     | 792.3165137                                           | 692.7381567 | 1043.034135     |        |
| 728.7500898                                                    | 0.516200329                                           | 0.005825207 | 0.041303311     |        |
| RAP1GDS1                                                       | 4 98261384                                            | 98443861    | + 5424          |        |
| protein_coding                                                 | Rap1 GTPase-GDP dissociation stimulator 1             |             |                 |        |
| [Source:HGNC Symbol;Acc:HGNC:9859]                             | -                                                     | 1118        | 975             | 953    |
| 698                                                            | 867 706                                               | 11.27241153 | 7.925358069     |        |
| 8.139086716                                                    | 6.222099592                                           | 6.965591706 | 6.076185948     |        |
| ENSG00000108953                                                | 16637.1089                                            | 17305.25085 | 18537.10237     |        |
| 12380.42201                                                    | 15426.86859                                           | 13456.38963 | 17493.15404     |        |
| 13754.56008                                                    | 0.346867894                                           | 0.005838319 | 0.041377089     | YWHAE  |
| 17                                                             | 1344272 1400378                                       | - 3847      | protein_coding  |        |

|                                                                                                                    |                                                                                 |             |             |            |
|--------------------------------------------------------------------------------------------------------------------|---------------------------------------------------------------------------------|-------------|-------------|------------|
| tyrosine 3-monooxygenase/tryptophan 5-monooxygenase activation protein epsilon [Source:HGNC Symbol;Acc:HGNC:12851] | -                                                                               | 14380       | 18669       |            |
| 18958                                                                                                              | 12324                                                                           | 16881       | 13714       | 204.423779 |
| 228.2825885                                                                                                        | 154.8926178                                                                     | 191.2205581 | 166.4132854 |            |
| ENSG00000085063                                                                                                    | 4752.798564                                                                     | 4717.254356 | 3484.873555 |            |
| 4814.943418                                                                                                        | 7867.419685                                                                     | 5666.519625 | 4318.308825 |            |
| 6116.294243                                                                                                        | -0.502333173                                                                    | 0.005848915 | 0.041432975 | CD59       |
| 11                                                                                                                 | 33703010                                                                        | 33736491    | -           | 10358      |
| protein_coding                                                                                                     | CD59 molecule (CD59 blood group) [Source:HGNC Symbol;Acc:HGNC:1689]             | -           | 4108        | 5089       |
| 5775                                                                                                               | 21.68948504                                                                     | 21.66159851 | 15.93911648 | 8609       |
| 22.37343872                                                                                                        | 36.21891189                                                                     | 26.02688048 |             |            |
| ENSG00000234616                                                                                                    | 953.3364208                                                                     | 1044.673936 | 1309.272079 |            |
| 1526.958897                                                                                                        | 1395.464033                                                                     | 1624.8929   | 1102.427479 |            |
| 1515.771944                                                                                                        | -0.458816334                                                                    | 0.005872038 | 0.041577512 | JRK        |
| 8                                                                                                                  | 142657460                                                                       | 142681968   | -           | 11229      |
| protein_coding                                                                                                     | Jrk helix-turn-helix protein [Source:HGNC Symbol;Acc:HGNC:6199]                 | -           | 824         | 1127       |
| 1656                                                                                                               | 4.013107954                                                                     | 4.425035836 | 5.523850943 | 1527       |
| 6.544910659                                                                                                        | 5.92593049                                                                      | 6.884387168 |             |            |
| ENSG00000260804                                                                                                    | 623.6023432                                                                     | 536.7047106 | 694.2368755 |            |
| 384.753459                                                                                                         | 476.1209961                                                                     | 405.2420095 | 618.1813097 |            |
| 422.0388216                                                                                                        | 0.550006455                                                                     | 0.005880209 | 0.04161609  |            |
| LINC01963                                                                                                          | 2                                                                               | 216217045   | 216220192   | +          |
| lincRNA                                                                                                            | long intergenic non-protein coding RNA 1963 [Source:HGNC Symbol;Acc:HGNC:25283] | -           | 539         | 579        |
| 383                                                                                                                | 521                                                                             | 413         | 9.363727235 | 8.10919601 |
| 10.4478296                                                                                                         | 5.882545117                                                                     | 7.212097634 | 6.124369201 |            |
| ENSG00000127990                                                                                                    | 1152.333829                                                                     | 979.7873559 | 1012.999159 |            |
| 701.195599                                                                                                         | 868.1668835                                                                     | 697.6442343 | 1048.373448 |            |
| 755.6689056                                                                                                        | 0.471515506                                                                     | 0.005891376 | 0.041654229 | SGCE       |
| 7                                                                                                                  | 94524204                                                                        | 94656572    | -           | 20884      |
| protein_coding                                                                                                     | sarcoglycan epsilon [Source:HGNC Symbol;Acc:HGNC:10808]                         | -           | 996         | 1057       |
| 711                                                                                                                | 2.608196853                                                                     | 2.231491622 | 2.297992075 | 950        |
| 1.616005947                                                                                                        | 1.982296063                                                                     | 1.589285613 |             |            |
| ENSG00000067141                                                                                                    | 1084.07309                                                                      | 1031.69662  | 1370.873379 |            |
| 720.2825852                                                                                                        | 818.8184502                                                                     | 935.0983901 | 1162.214363 |            |
| 824.7331418                                                                                                        | 0.494927372                                                                     | 0.005892255 | 0.041654229 | NEO1       |
| 15                                                                                                                 | 73051710                                                                        | 73305206    | +           | 8117       |
| protein_coding                                                                                                     | neogenin 1 [Source:HGNC Symbol;Acc:HGNC:7754]                                   | -           | 937         | 1113       |
| 937                                                                                                                | 1113                                                                            | 1402        | 717         | 896        |
| 6.045518804                                                                                                        | 8.001196263                                                                     | 4.270953334 | 4.810287804 |            |
| 5.480792882                                                                                                        |                                                                                 |             |             |            |
| ENSG00000143819                                                                                                    | 575.0099528                                                                     | 487.5763001 | 711.837247  |            |
| 391.7855066                                                                                                        | 368.2855306                                                                     | 427.8099665 | 591.4745    |            |
| 395.9603346                                                                                                        | 0.579024451                                                                     | 0.005893772 | 0.041654229 | EPHX1      |
| 1                                                                                                                  | 225810092                                                                       | 225845563   | +           | 2508       |
| protein_coding                                                                                                     | epoxide hydrolase 1 [Source:HGNC Symbol;Acc:HGNC:3401]                          | -           | 497         | 526        |
| -                                                                                                                  | 497                                                                             | 526         | 728         | 390        |
|                                                                                                                    |                                                                                 |             | 403         | 436        |

|                                     |                                                 |              |             |        |
|-------------------------------------|-------------------------------------------------|--------------|-------------|--------|
| 10.83736173                         | 9.246815024                                     | 13.44640856  | 7.518622696 |        |
| 7.002225807                         | 8.115307733                                     |              |             |        |
| ENSG00000112996                     | 1734.285552                                     | 1778.819239  | 1313.183273 |        |
| 2149.797395                         | 2247.181439                                     | 2093.913919  | 1608.762688 |        |
| 2163.630917                         | -0.42768422                                     | 0.005907213  | 0.04172993  | MRPS30 |
| 5                                   | 44808925                                        | 44820428     | + 6202      |        |
| protein_coding                      | mitochondrial ribosomal protein S30             | [Source:HGNC |             |        |
| Symbol;Acc:HGNC:8769]               | -                                               | 1499 1919    | 1343 2140   | 2459   |
| 2134                                | 13.21796458                                     | 13.64197253  | 10.03105719 |        |
| 16.68334873                         | 17.27767755                                     | 16.06233536  |             |        |
| ENSG00000149084                     | 1778.250096                                     | 1485.902679  | 1554.699482 |        |
| 1140.196282                         | 1321.441383                                     | 1142.134865  | 1606.284085 |        |
| 1201.25751                          | 0.418577482                                     | 0.005916112  | 0.041773487 |        |
| HSD17B12                            | 11 43680558                                     | 43856617     | +           | 7838   |
| protein_coding                      | hydroxysteroid 17-beta dehydrogenase 12         |              |             |        |
| [Source:HGNC Symbol;Acc:HGNC:18646] | -                                               | 1537 1603    |             | 1590   |
| 1135 1446 1164                      | 10.7241609                                      | 9.017003146  |             |        |
| 9.397110224                         | 7.0015117                                       | 8.039362867  | 6.932561916 |        |
| ENSG00000172115                     | 4151.178492                                     | 4342.766095  | 4036.351862 |        |
| 3485.88643                          | 3240.547125                                     | 3219.368119  | 4176.765483 |        |
| 3315.267225                         | 0.333332173                                     | 0.005933023  | 0.041873556 | CYCS   |
| 7                                   | 25120091                                        | 25125361     | - 4457      |        |
| protein_coding                      | "cytochrome c, somatic [Source:HGNC             |              |             |        |
| Symbol;Acc:HGNC:19986]"             | -                                               | 3588 4685    | 4128 3470   | 3546   |
| 3281                                | 44.0255219                                      | 46.34479005  | 42.90417055 |        |
| 37.64333193                         | 34.67006812                                     | 34.36446857  |             |        |
| ENSG00000171453                     | 963.7490759                                     | 1078.971128  | 899.5745429 |        |
| 1321.020362                         | 1355.254198                                     | 1258.899511  | 980.7649156 |        |
| 1311.724691                         | -0.419293049                                    | 0.005952187  | 0.041989424 | POLR1C |
| 6                                   | 43509702                                        | 43562419     | + 5550      |        |
| protein_coding                      | RNA polymerase I and III subunit C [Source:HGNC |              |             |        |
| Symbol;Acc:HGNC:20194]              | -                                               | 833 1164     | 920 1315    | 1483   |
| 1283                                | 8.208177342                                     | 9.246853034  | 7.678869731 |        |
| 11.45602588                         | 11.6441225                                      | 10.79144767  |             |        |
| ENSG00000226419                     | 273.0429555                                     | 342.9719221  | 312.8954932 |        |
| 431.9686355                         | 436.8250214                                     | 535.7436736  | 309.6367903 |        |
| 468.1791102                         | -0.595202147                                    | 0.005957554  | 0.041995908 |        |
| SLC16A1-AS1                         | 1 112956415                                     | 113047055    | +           | 10138  |
| antisense                           | SLC16A1 antisense RNA 1 [Source:HGNC            |              |             |        |
| Symbol;Acc:HGNC:49445]              | -                                               | 236 370      | 320 430     | 478    |
| 546                                 | 1.273076287                                     | 1.609101335  | 1.46217767  |        |
| 2.050772028                         | 2.054632755                                     | 2.51412225   |             |        |
| ENSG00000162772                     | 77.51643227                                     | 127.9192574  | 71.37928438 |        |
| 156.7142026                         | 231.206549                                      | 160.9193452  | 92.27165803 |        |
| 182.9466989                         | -0.985453225                                    | 0.0059586    | 0.041995908 | ATF3   |
| 1                                   | 212565334                                       | 212620777    | + 4040      |        |
| protein_coding                      | activating transcription factor 3 [Source:HGNC  |              |             |        |
| Symbol;Acc:HGNC:785]                | TF_bZIP 67 138                                  | 73 156       |             | 253    |
| 164                                 | 0.906960035                                     | 1.506023259  | 0.837035641 |        |
| 1.867000567                         | 2.728963668                                     | 1.894996965  |             |        |

|                                                           |                                                  |                |                          |                |
|-----------------------------------------------------------|--------------------------------------------------|----------------|--------------------------|----------------|
| ENSG00000169064                                           | 21.98227184                                      | 3.707804563    | 10.75578258              | 0              |
| 0                                                         | 0.981215519                                      | 12.14861966    | 0.32707184               |                |
| 5.129221278                                               | 0.005963694                                      | 1              | ZBBX                     | 3              |
| 167381346                                                 | -                                                | 3972           | protein_coding           | zinc finger B- |
| box domain containing [Source:HGNC Symbol;Acc:HGNC:26245] | -                                                |                |                          |                |
| 19                                                        | 4                                                | 11             | 0                        | 0              |
| 0.044400178                                               | 0.128287961                                      | 0              | 0                        | 0.011752677    |
| ENSG00000143333                                           | 54.37719876                                      | 103.8185278    | 51.82331606              |                |
| 106.4852915                                               | 184.5996952                                      | 166.8066383    | 70.00634753              |                |
| 152.6305417                                               | -1.12150163                                      | 0.005965739    | 0.042026848              | RGS16          |
| 1                                                         | 182598623                                        | 182604408      | -                        | 2427           |
| protein_coding                                            | regulator of G protein signaling 16 [Source:HGNC |                |                          |                |
| Symbol;Acc:HGNC:9997]                                     | -                                                | 47             | 112                      | 53             |
| 170                                                       | 1.059065436                                      | 2.034614824    | 1.011599367              | 106            |
| 2.111724728                                               | 3.626938494                                      | 3.269830051    |                          | 202            |
| ENSG00000137962                                           | 1847.667796                                      | 854.6489519    | 1246.692981              |                |
| 867.9555838                                               | 809.6798514                                      | 875.2442434    | 1316.336576              |                |
| 850.9598929                                               | 0.628543044                                      | 0.005992736    | 0.042197582              |                |
| ARHGAP29                                                  | 1                                                | 94148988       | 94275068                 | -              |
| protein_coding                                            | Rho GTPase activating protein 29 [Source:HGNC    |                |                          | 15524          |
| Symbol;Acc:HGNC:30207]                                    | -                                                | 1597           | 922                      | 1275           |
| 892                                                       | 5.625951641                                      | 2.618552255    | 3.804600026              | 864            |
| 2.690985297                                               | 2.487073875                                      | 2.682299423    |                          | 886            |
| ENSG00000126767                                           | 903.5870687                                      | 1038.185278    | 1030.599531              |                |
| 1319.011206                                               | 1304.078045                                      | 1323.659736    | 990.7906257              |                |
| 1315.582995                                               | -0.408488076                                     | 0.006000318    | 0.042231522              | ELK1           |
| X                                                         | 47635521                                         | 47650604       | -                        | 3398           |
| protein_coding                                            | "ELK1, ETS transcription factor [Source:HGNC     |                |                          |                |
| Symbol;Acc:HGNC:3321]"                                    | ETS                                              | 781            | 1120                     | 1054           |
| 1349                                                      | 12.56962647                                      | 14.53210764    | 14.36877328              | 1313           |
| 18.68282596                                               | 18.30034159                                      | 18.5325257     |                          | 1427           |
| ENSG00000147614                                           | 24.29619519                                      | 19.46597396    | 12.71137941              |                |
| 103.4715569                                               | 31.98509571                                      | 52.98563805    | 18.82451619              |                |
| 62.81409688                                               | -1.741214104                                     | 0.006011805    | 0.042292897              |                |
| ATP6V0D2                                                  | 8                                                | 85987323       | 86154228                 | +              |
| protein_coding                                            | ATPase H+ transporting V0 subunit d2             |                |                          | 3010           |
| [Source:HGNC Symbol;Acc:HGNC:18266]                       | -                                                |                | 21                       | 21             |
| 103                                                       | 35                                               | 54             | 0.381546533              | 0.307600302    |
| 0.200068775                                               | 1.654519712                                      | 0.506710783    | 0.837477793              |                |
| ENSG00000171227                                           | 8.09873173                                       | 15.75816939    | 3.911193665              | 0              |
| 0                                                         | 0                                                | 9.256031596    | 0                        | 5.704697311    |
| 0.006018759                                               | 1                                                | TMEM37         | 2                        | 119429901      |
| +                                                         | 2292                                             | protein_coding | transmembrane protein 37 | 119438520      |
| [Source:HGNC Symbol;Acc:HGNC:18216]                       | -                                                |                | 7                        | 17             |
| 0                                                         | 0                                                | 0              | 0.167023715              | 0.327015446    |
| 0.080844008                                               | 0                                                | 0              | 0                        |                |
| ENSG00000198917                                           | 688.3921971                                      | 861.1376098    | 913.2637207              |                |
| 1217.548805                                               | 1068.302197                                      | 1120.548123    | 820.9311759              |                |
| 1135.466375                                               | -0.466965053                                     | 0.00602717     | 0.042381486              | SPOUT1         |
| 9                                                         | 128819651                                        | 128829821      | -                        | 4593           |

|                                     |                                                       |             |             |             |        |  |
|-------------------------------------|-------------------------------------------------------|-------------|-------------|-------------|--------|--|
| protein_coding                      | SPOUT domain containing methyltransferase 1           |             |             |             |        |  |
| [Source:HGNC Symbol;Acc:HGNC:26933] | -                                                     | 595         | 929         |             | 934    |  |
| 1212                                | 1169                                                  | 1142        | 7.08459834  | 8.917707564 |        |  |
| 9.42004303                          | 12.75872835                                           | 11.09115216 | 11.60688534 |             |        |  |
| ENSG0000022267                      | 2083.687978                                           | 1951.232151 | 1885.195346 |             |        |  |
| 1676.641053                         | 1459.434224                                           | 1349.171339 | 1973.371825 |             |        |  |
| 1495.082205                         | 0.400362025                                           | 0.006034092 | 0.042388798 |             | FHL1   |  |
| X                                   | 136146702                                             | 136211359   | +           | 5997        |        |  |
| protein_coding                      | four and a half LIM domains 1 [Source:HGNC            |             |             |             |        |  |
| Symbol;Acc:HGNC:3702]               | -                                                     | 1801        | 2105        | 1928        | 1669   |  |
| 1375                                | 16.42382757                                           | 15.47576083 | 14.89276843 |             | 1597   |  |
| 13.45623318                         | 11.60458102                                           | 10.70322574 |             |             |        |  |
| ENSG00000139572                     | 11.56961676                                           | 24.10072966 | 10.75578258 |             |        |  |
| 74.33878843                         | 49.34843338                                           | 37.28618974 | 15.47537633 |             |        |  |
| 53.65780385                         | -1.786460252                                          | 0.006034928 | 0.042388798 |             | GPR84  |  |
| 12                                  | 54362445                                              | 54364487    | -           | 2043        |        |  |
| protein_coding                      | G protein-coupled receptor 84 [Source:HGNC            |             |             |             |        |  |
| Symbol;Acc:HGNC:4535]               | -                                                     | 10          | 26          | 11          | 74     |  |
| 38                                  | 0.267686424                                           | 0.561098282 | 0.249417415 |             | 54     |  |
| 1.751316219                         | 1.151818344                                           | 0.868282935 |             |             |        |  |
| ENSG00000198900                     | 4079.446869                                           | 3989.59771  | 4507.650699 |             |        |  |
| 3477.849805                         | 3360.262769                                           | 2998.594627 | 4192.231759 |             |        |  |
| 3278.9024                           | 0.35452473                                            | 0.006036529 | 0.042388798 |             | TOP1   |  |
| 20                                  | 41028818                                              | 41124487    | +           | 3738        |        |  |
| protein_coding                      | DNA topoisomerase I [Source:HGNC                      |             |             |             |        |  |
| Symbol;Acc:HGNC:11986]              | -                                                     | 3526        | 4304        | 4610        | 3462   |  |
| 3056                                | 51.58669723                                           | 50.76529609 | 57.1299816  |             | 3677   |  |
| 44.7805046                          | 42.86599713                                           | 38.16454497 |             |             |        |  |
| ENSG00000166037                     | 2221.366417                                           | 1863.171793 | 1876.395161 |             |        |  |
| 1591.251904                         | 1580.977588                                           | 1246.14371  | 1986.97779  |             |        |  |
| 1472.791067                         | 0.431636208                                           | 0.006084414 | 0.042705434 |             | CEP57  |  |
| 11                                  | 95789965                                              | 95832693    | +           | 7101        |        |  |
| protein_coding                      | centrosomal protein 57 [Source:HGNC                   |             |             |             |        |  |
| Symbol;Acc:HGNC:30794]              | -                                                     | 1920        | 2010        | 1919        | 1584   |  |
| 1270                                | 14.78687593                                           | 12.47988268 | 12.51866212 |             | 1730   |  |
| 10.78541551                         | 10.61659348                                           | 8.348918933 |             |             |        |  |
| ENSG00000189159                     | 2456.229638                                           | 2738.21367  | 3425.227852 |             |        |  |
| 1776.094297                         | 2125.638075                                           | 2383.372497 | 2873.22372  |             |        |  |
| 2095.034956                         | 0.455842268                                           | 0.006094707 | 0.042758044 |             | JPT1   |  |
| 17                                  | 75135248                                              | 75168281    | -           | 3414        |        |  |
| protein_coding                      | Jupiter microtubule associated homolog 1 [Source:HGNC |             |             |             |        |  |
| Symbol;Acc:HGNC:14569]              | -                                                     | 2123        | 2954        | 3503        | 1768   |  |
| 2429                                | 34.00800769                                           | 38.14880446 | 47.53123256 |             | 2326   |  |
| 25.03917182                         | 29.68963041                                           | 33.21314747 |             |             |        |  |
| ENSG00000172716                     | 1841.882988                                           | 1683.343272 | 1680.835477 |             |        |  |
| 1289.878437                         | 1274.834529                                           | 1418.837641 | 1735.353912 |             |        |  |
| 1327.850202                         | 0.385944892                                           | 0.006098836 | 0.04276739  |             | SLFN11 |  |
| 17                                  | 35350305                                              | 35373701    | -           | 5982        |        |  |
| protein_coding                      | schlafen family member 11 [Source:HGNC                |             |             |             |        |  |
| Symbol;Acc:HGNC:26633]              | -                                                     | 1592        | 1816        | 1719        | 1284   |  |
|                                     |                                                       |             |             |             | 1395   |  |



|                                                           |                                                                       |             |                          |                |
|-----------------------------------------------------------|-----------------------------------------------------------------------|-------------|--------------------------|----------------|
| 1446                                                      | 14.5543015                                                            | 13.38453826 | 13.31165103              |                |
| 10.37814733                                               | 10.16216862                                                           | 11.28412582 |                          |                |
| ENSG00000259469                                           | 15.04050178                                                           | 4.634755704 | 7.822387329              | 0              |
| 0                                                         | 0                                                                     | 9.165881606 | 0                        | 5.685769156    |
| 0.00610609                                                | 1                                                                     | AC084757.2  | 15                       | 48729080       |
| 48729844                                                  | -                                                                     | 540         | lincRNA novel transcript | -              |
| 13                                                        | 5                                                                     | 8           | 0                        | 0              |
| 0.408234968                                               | 0.686275797                                                           | 0           | 0                        | 1.316571062    |
| ENSG00000115268                                           | 22184.74013                                                           | 19059.96936 | 19873.75281              |                |
| 23826.58627                                               | 26572.30366                                                           | 26174.9052  | 20372.82077              |                |
| 25524.59837                                               | -0.325295311                                                          | 0.006106224 | 0.042799562              | RPS15          |
| 19                                                        | 1438358                                                               | 1440494 +   | 2137                     | protein_coding |
| ribosomal protein S15 [Source:HGNC Symbol;Acc:HGNC:10388] |                                                                       |             |                          | -              |
| 19175                                                     | 20562                                                                 | 20325       | 23718                    | 29077          |
| 424.2235663                                               | 440.583763                                                            | 536.6297665 | 592.9303379              |                |
| 582.7230838                                               |                                                                       |             |                          |                |
| ENSG00000133110                                           | 118.0100909                                                           | 114.9419415 | 27.37835565              |                |
| 224.0209435                                               | 271.4163836                                                           | 130.5016641 | 86.77679601              |                |
| 208.6463304                                               | -1.267631101                                                          | 0.006113971 | 0.042817394              | POSTN          |
| 13                                                        | 37562583                                                              | 37598844    | -                        | 5464           |
| protein_coding                                            | periostin [Source:HGNC Symbol;Acc:HGNC:16953]                         |             |                          | -              |
| 102                                                       | 124                                                                   | 28          | 223                      | 297            |
| 1.000564183                                               | 0.2373831                                                             | 1.973310328 | 2.368668892              |                |
| 1.136284248                                               |                                                                       |             |                          |                |
| ENSG00000141424                                           | 2642.500467                                                           | 2351.675044 | 2200.046436              |                |
| 1832.350677                                               | 1748.213945                                                           | 1944.76916  | 2398.073983              |                |
| 1841.777927                                               | 0.380560595                                                           | 0.00611437  | 0.042817394              |                |
| SLC39A6                                                   | 18                                                                    | 36108532    | 36129385                 | -              |
| protein_coding                                            | solute carrier family 39 member 6 [Source:HGNC Symbol;Acc:HGNC:18607] |             |                          | -              |
| 1982                                                      | 33.92399794                                                           | 30.37880184 | 28.30747874              | 1913           |
| 23.95202666                                               | 22.64069653                                                           | 25.12846163 |                          |                |
| ENSG00000165819                                           | 1268.029997                                                           | 1104.92576  | 1339.58383               |                |
| 899.0975087                                               | 778.6086156                                                           | 1017.520494 | 1237.513196              |                |
| 898.4088727                                               | 0.462045318                                                           | 0.006141278 | 0.042986135              | METTL3         |
| 14                                                        | 21498133                                                              | 21511375    | -                        | 5894           |
| protein_coding                                            | methyltransferase like 3 [Source:HGNC Symbol;Acc:HGNC:17563]          |             |                          | -              |
| 1037                                                      | 10.16939544                                                           | 8.91661637  | 10.76745069              | 852            |
| 7.341995607                                               | 6.299238633                                                           | 8.213242782 |                          |                |
| ENSG00000104450                                           | 606.2479181                                                           | 527.4351991 | 592.5458402              |                |
| 494.2524852                                               | 296.0906003                                                           | 318.8950438 | 575.4096525              |                |
| 369.7460431                                               | 0.638456442                                                           | 0.006146341 | 0.043001882              | SPAG1          |
| 8                                                         | 100157906                                                             | 100259278   | +                        | 5055           |
| protein_coding                                            | sperm associated antigen 1 [Source:HGNC Symbol;Acc:HGNC:11212]        |             |                          | -              |
| 325                                                       | 5.66897889                                                            | 4.96278047  | 5.553335605              | 324            |
| 4.705926711                                               | 2.793074038                                                           | 3.001291905 |                          |                |
| ENSG00000155561                                           | 3305.439508                                                           | 3038.54584  | 3415.449868              |                |
| 2888.162388                                               | 2302.013031                                                           | 2205.772488 | 3253.145072              |                |

|                        |                                               |                       |                        |        |
|------------------------|-----------------------------------------------|-----------------------|------------------------|--------|
| 2465.315969            | 0.400109507                                   | 0.006151522           | 0.043018445            | NUP205 |
| 7                      | 135557919                                     | 135648757             | + 7619                 |        |
| protein_coding         | nucleoporin 205                               | [Source:HGNC          | Symbol;Acc:HGNC:18658] |        |
| -                      | 2857 3278                                     | 3493 2875             | 2519 2248              |        |
| 20.50722893            | 18.96902171                                   | 21.23748416           | 18.24488339            |        |
| 14.40750542            | 13.77350177                                   |                       |                        |        |
| ENSG00000231942        | 0 0                                           | 0 24.10987733         | 10.96631853            |        |
| 0                      | 0 11.69206529                                 | -5.966794994          | 0.006163285            |        |
| 1                      | HNRNPA1P36                                    | 8 81807772            | 81808726               |        |
| +                      | 955 processed_pseudogene                      | heterogeneous nuclear |                        |        |
| ribonucleoprotein A1   | pseudogene 36                                 | [Source:HGNC          |                        |        |
| Symbol;Acc:HGNC:48765] | - 0 0                                         | 0 24 12               |                        |        |
| 0                      | 0 0                                           | 0 1.21509179          | 0.547565998            |        |
| 0                      |                                               |                       |                        |        |
| ENSG00000182810        | 484.7669421                                   | 549.6820265           | 445.8760778            |        |
| 782.566435             | 777.6947557                                   | 589.7105272           | 493.4416821            |        |
| 716.6572393            | -0.538181671                                  | 0.006187728           | 0.043251849            | DDX28  |
| 16                     | 68021274                                      | 68023442              | - 2169                 |        |
| protein_coding         | DEAD-box helicase 28                          | [Source:HGNC          |                        |        |
| Symbol;Acc:HGNC:17330] | - 419 593                                     | 456 779               | 851                    |        |
| 601                    | 10.56450575                                   | 12.05394205           | 9.738851562            |        |
| 17.36517331            | 17.09734227                                   | 12.93483687           |                        |        |
| ENSG00000216867        | 13.88354011                                   | 4.634755704           | 8.800185745            | 0      |
| 0                      | 0 9.106160519                                 | 0 5.676832568         |                        |        |
| 0.006188344            | 1 RPL22P12                                    | 2 110633947           |                        |        |
| 110634333              | + 387 processed_pseudogene                    | ribosomal             |                        |        |
| protein L22            | pseudogene 12                                 | [Source:HGNC          | Symbol;Acc:HGNC:36345] | -      |
| 12                     | 5 9 0 0                                       | 0 1.69576237          |                        |        |
| 0.569630188            | 1.077293403                                   | 0 0 0                 |                        |        |
| ENSG00000040531        | 738.1415491                                   | 704.482867            | 766.5939583            |        |
| 1070.880385            | 922.9984762                                   | 1000.83983            | 736.4061248            |        |
| 998.2395636            | -0.438798351                                  | 0.006196392           | 0.043292618            | CTNS   |
| 17                     | 3636468 3661542                               | + 3398                |                        |        |
| protein_coding         | "cystinosin, lysosomal cystine transporter    |                       |                        |        |
| [Source:HGNC           | Symbol;Acc:HGNC:2518]"                        | - 638 760             | 784                    |        |
| 1066                   | 1010 1020                                     | 10.26814557           | 9.861073043            |        |
| 10.68796798            | 15.16823493                                   | 12.95258935           | 14.01273255            |        |
| ENSG00000133030        | 6509.066388                                   | 6687.952481           | 8360.176458            |        |
| 6140.986671            | 4866.303847                                   | 5365.28646            | 7185.731776            |        |
| 5457.52566             | 0.397006172                                   | 0.006201867           | 0.043293566            | MPRIIP |
| 17                     | 17042545                                      | 17217679              | + 18153                |        |
| protein_coding         | myosin phosphatase Rho interacting protein    |                       |                        |        |
| [Source:HGNC           | Symbol;Acc:HGNC:30321]                        | - 5626 7215           | 8550                   |        |
| 6113                   | 5325 5468                                     | 16.94907623           | 17.52354167            |        |
| 21.81826252            | 16.28197954                                   | 12.78291209           | 14.06132137            |        |
| ENSG00000161682        | 202.4682933                                   | 386.5386257           | 432.1868999            |        |
| 468.1334515            | 615.0276975                                   | 620.1282083           | 340.3979396            |        |
| 567.7631191            | -0.736112787                                  | 0.006207626           | 0.043293566            |        |
| FAM171A2               | 17 44353215                                   | 44363875              | - 3592                 |        |
| protein_coding         | family with sequence similarity 171 member A2 |                       |                        |        |

|                                     |                                                       |             |             |                |
|-------------------------------------|-------------------------------------------------------|-------------|-------------|----------------|
| [Source:HGNC Symbol;Acc:HGNC:30480] | -                                                     | 175         | 417         | 442            |
| 466                                 | 673                                                   | 632         | 2.664381647 | 5.118393662    |
| 5.700177731                         | 6.272646384                                           | 8.16464552  | 8.213472098 |                |
| ENSG00000188779                     | 18.51138681                                           | 29.66243651 | 31.28954932 |                |
| 98.44866576                         | 49.34843338                                           | 72.60994844 | 26.48779088 |                |
| 73.46901586                         | -1.465909711                                          | 0.00620794  | 0.043293566 | SKOR1          |
| 15                                  | 67819704                                              | 67834561    | + 4479      |                |
| protein_coding                      | SKI family transcriptional corepressor 1 [Source:HGNC |             |             |                |
| Symbol;Acc:HGNC:21326]              | -                                                     | 16          | 32          | 32 98 54       |
| 74                                  | 0.195359094                                           | 0.31499443  | 0.330956848 |                |
| 1.057903928                         | 0.525377289                                           | 0.771252692 |             |                |
| ENSG00000275395                     | 3.470885027                                           | 43.56670362 | 27.37835565 |                |
| 101.4624004                         | 68.53949081                                           | 86.34696571 | 24.80531477 |                |
| 85.44961898                         | -1.772516469                                          | 0.006208479 | 0.043293566 | FCGBP          |
| 19                                  | 39863323                                              | 39934626    | - 12961     |                |
| protein_coding                      | Fc fragment of IgG binding protein [Source:HGNC       |             |             |                |
| Symbol;Acc:HGNC:13572]              | -                                                     | 3           | 47          | 28 101 75      |
| 88                                  | 0.01265836                                            | 0.159879693 | 0.100074165 |                |
| 0.376776736                         | 0.252162993                                           | 0.316949592 |             |                |
| ENSG00000111731                     | 894.3313753                                           | 812.0091994 | 740.193401  |                |
| 479.1838119                         | 568.4208438                                           | 661.3392601 | 815.5113252 |                |
| 569.6479719                         | 0.517114925                                           | 0.006210688 | 0.043293566 | C2CD5          |
| 12                                  | 22448583                                              | 22544546    | - 6759      |                |
| protein_coding                      | C2 calcium dependent domain containing 5 [Source:HGNC |             |             |                |
| Symbol;Acc:HGNC:29062]              | -                                                     | 773         | 876         | 757 477 622    |
| 674                                 | 6.254487951                                           | 5.71420238  | 5.188190198 |                |
| 3.412220981                         | 4.010204648                                           | 4.655040737 |             |                |
| ENSG00000127948                     | 861.9364484                                           | 1223.575506 | 1096.112025 |                |
| 1573.169496                         | 1256.557331                                           | 1640.592349 | 1060.541326 |                |
| 1490.106392                         | -0.489643025                                          | 0.006227968 | 0.04339423  | POR            |
| 7                                   | 75899200                                              | 75986855    | + 6112      |                |
| protein_coding                      | cytochrome p450 oxidoreductase [Source:HGNC           |             |             |                |
| Symbol;Acc:HGNC:9208]               | -                                                     | 745         | 1320        | 1121 1566 1375 |
| 1672                                | 6.666035772                                           | 9.521920334 | 8.496199916 |                |
| 12.38824052                         | 9.803427701                                           | 12.77023718 |             |                |
| ENSG00000180776                     | 2468.956216                                           | 1815.897285 | 2025.998318 |                |
| 1599.288529                         | 1650.430939                                           | 1433.555874 | 2103.617273 |                |
| 1561.091781                         | 0.429769484                                           | 0.006235261 | 0.043425252 |                |
| ZDHHC20 13                          | 21372573                                              | 21459370    | - 5574      |                |
| protein_coding                      | zinc finger DHHC-type containing 20 [Source:HGNC      |             |             |                |
| Symbol;Acc:HGNC:20749]              | -                                                     | 2134        | 1959        | 2072 1592 1806 |
| 1461                                | 20.93737172                                           | 15.4953514  | 17.21968658 |                |
| 13.80947969                         | 14.11917689                                           | 12.23571316 |             |                |
| ENSG00000185909                     | 116.8531292                                           | 145.5313291 | 190.6706912 |                |
| 228.0392564                         | 238.517428                                            | 332.6320611 | 151.0183832 |                |
| 266.3962485                         | -0.816895784                                          | 0.00624064  | 0.043442926 |                |
| KLHDC8B 3                           | 49171611                                              | 49176486    | + 2158      |                |
| protein_coding                      | kelch domain containing 8B [Source:HGNC               |             |             |                |
| Symbol;Acc:HGNC:28557]              | -                                                     | 101         | 157         | 195 227 261    |
| 339                                 | 2.559556061                                           | 3.207614515 | 4.185868944 |                |

|                                     |                                                      |             |             |             |      |             |  |
|-------------------------------------|------------------------------------------------------|-------------|-------------|-------------|------|-------------|--|
| 5.085991539                         | 5.270449601                                          | 7.333212899 |             |             |      |             |  |
| ENSG00000266074                     | 790.2048245                                          | 847.2333427 | 1857.816991 |             |      |             |  |
| 640.9209057                         | 316.1955176                                          | 403.2795785 | 1165.085053 |             |      |             |  |
| 453.4653339                         | 1.361648651                                          | 0.006246151 | 0.043461498 | BAHCC1      |      |             |  |
| 17                                  | 81395475                                             | 81466332    | + 13473     |             |      |             |  |
| protein_coding                      | BAH domain and coiled-coil containing 1 [Source:HGNC |             |             |             |      |             |  |
| Symbol;Acc:HGNC:29279]              | -                                                    | 683         | 914         | 1900        | 638  | 346         |  |
| 411                                 | 2.772369464                                          | 2.990996081 | 6.532685445 |             |      |             |  |
| 2.289589293                         | 1.119103842                                          | 1.424044458 |             |             |      |             |  |
| ENSG00000210077                     | 108.7543975                                          | 163.1434008 | 81.15726854 |             |      |             |  |
| 306.3963577                         | 179.116536                                           | 200.167966  | 117.6850223 |             |      |             |  |
| 228.5602866                         | -0.955584756                                         | 0.00627641  | 0.043652177 | MT-TV       |      |             |  |
| MT                                  | 1602                                                 | 1670        | + 69        | Mt_tRNA     |      |             |  |
| mitochondrially                     | encoded tRNA valine [Source:HGNC                     |             |             |             |      |             |  |
| Symbol;Acc:HGNC:7500]               | -                                                    | 94          | 176         | 83          | 305  | 196         |  |
| 204                                 | 74.50295108                                          | 112.4598591 | 55.72261093 |             |      |             |  |
| 213.7233462                         | 123.7843038                                          | 138.0152615 |             |             |      |             |  |
| ENSG00000133422                     | 963.7490759                                          | 1018.719304 | 1109.801202 |             |      |             |  |
| 1416.455293                         | 1311.388924                                          | 1365.852003 | 1030.756527 |             |      |             |  |
| 1364.565407                         | -0.404337261                                         | 0.006295073 | 0.043762063 | MORC2       |      |             |  |
| 22                                  | 30925130                                             | 30968298    | - 6258      |             |      |             |  |
| protein_coding                      | MORC family CW-type zinc finger 2 [Source:HGNC       |             |             |             |      |             |  |
| Symbol;Acc:HGNC:23573]              | -                                                    | 833         | 1099        | 1135        | 1410 | 1435        |  |
| 1392                                | 7.279543664                                          | 7.742765238 | 8.401614656 |             |      |             |  |
| 10.89393477                         | 9.992518017                                          | 10.38364214 |             |             |      |             |  |
| ENSG00000166503                     | 1962.207002                                          | 1707.444001 | 1832.394232 |             |      |             |  |
| 1285.860124                         | 1470.400543                                          | 1439.443167 | 1834.015078 |             |      |             |  |
| 1398.567945                         | 0.390644856                                          | 0.006305568 | 0.043815101 | HDGFL3      |      |             |  |
| 15                                  | 83112738                                             | 83208018    | - 16253     |             |      |             |  |
| protein_coding                      | HDGF like 3 [Source:HGNC Symbol;Acc:HGNC:24937] -    |             |             |             |      |             |  |
| 1696                                | 1842                                                 | 1874        | 1280        | 1609        | 1467 | 5.706726056 |  |
| 4.996777928                         | 5.3411959                                            | 3.807830874 | 4.314009593 |             |      |             |  |
| 4.213496275                         |                                                      |             |             |             |      |             |  |
| ENSG00000120889                     | 3618.976122                                          | 4670.906799 | 4114.575735 |             |      |             |  |
| 5230.838802                         | 6442.712136                                          | 4837.392511 | 4134.819552 |             |      |             |  |
| 5503.647816                         | -0.412427143                                         | 0.006317767 | 0.043864014 |             |      |             |  |
| TNFRSF10B                           | 8                                                    | 23020133    | 23069179    | -           |      | 5158        |  |
| protein_coding                      | TNF receptor superfamily member 10b                  |             |             |             |      |             |  |
| [Source:HGNC Symbol;Acc:HGNC:11905] | -                                                    |             | 3128        | 5039        | 4208 |             |  |
| 5207                                | 7050                                                 | 4930        | 33.16500899 | 43.07219244 |      |             |  |
| 37.79173661                         | 48.80984813                                          | 59.56160292 | 44.61815597 |             |      |             |  |
| ENSG00000197632                     | 492.8656739                                          | 456.0599613 | 147.6475608 |             |      |             |  |
| 866.9510056                         | 1111.253611                                          | 920.3801573 | 365.5243987 |             |      |             |  |
| 966.1949246                         | -1.402722686                                         | 0.006318346 | 0.043864014 |             |      |             |  |
| SERPINB2                            | 18                                                   | 63871692    | 63903890    | +           |      | 2748        |  |
| protein_coding                      | serpin family B member 2 [Source:HGNC                |             |             |             |      |             |  |
| Symbol;Acc:HGNC:8584]               | -                                                    | 426         | 492         | 151         | 863  | 1216        |  |
| 938                                 | 8.477886215                                          | 7.893731178 | 2.545438888 |             |      |             |  |
| 15.18431777                         | 19.28303743                                          | 15.93426905 |             |             |      |             |  |
| ENSG00000135776                     | 403.7796248                                          | 469.9642284 | 407.7419395 |             |      |             |  |

|                                                |                                                     |             |             |                |
|------------------------------------------------|-----------------------------------------------------|-------------|-------------|----------------|
| 315.4375617                                    | 197.3937335                                         | 296.3270869 | 427.1619309 |                |
| 269.7194607                                    | 0.664630017                                         | 0.006334039 | 0.043952995 | ABCB10         |
| 1                                              | 229516582                                           | 229558695   | - 4256      |                |
| protein_coding                                 | ATP binding cassette subfamily B member 10          |             |             |                |
| [Source:HGNC Symbol;Acc:HGNC:41]               | -                                                   | 349         | 507         | 417            |
| 314                                            | 216 302                                             | 4.484546385 | 5.252188422 |                |
| 4.53875658                                     | 3.567214669                                         | 2.211621125 | 3.312465468 |                |
| ENSG00000175575                                | 549.556796                                          | 721.1679876 | 652.1915436 |                |
| 944.3035287                                    | 1009.815165                                         | 779.0851225 | 640.972109  |                |
| 911.0679386                                    | -0.506485211                                        | 0.006342596 | 0.043992408 | PAAF1          |
| 11                                             | 73876699                                            | 73931124    | + 7937      |                |
| protein_coding                                 | proteasomal ATPase associated factor 1 [Source:HGNC |             |             |                |
| Symbol;Acc:HGNC:25687]                         | -                                                   | 475 778     | 667 940     | 1105           |
| 794                                            | 3.272894016                                         | 4.32172546  | 3.892888003 |                |
| 5.726281447                                    | 6.066867296                                         | 4.669927712 |             |                |
| ENSG00000136689                                | 9.255693406                                         | 5.561706845 | 0           | 23.10529911    |
| 54.83159264                                    | 20.60552591                                         | 4.939133417 | 32.84747255 |                |
| -2.752267489                                   | 0.006348701                                         | 0.044014782 | IL1RN       | 2              |
| 113107214                                      | 113134016                                           | +           | 3256        | protein_coding |
| interleukin 1 receptor antagonist [Source:HGNC |                                                     |             |             |                |
| Symbol;Acc:HGNC:6000]                          | -                                                   | 8 6         | 0           | 23 60          |
| 21                                             | 0.134369377                                         | 0.08124578  | 0           | 0.341542424    |
| 0.803018317                                    | 0.301079325                                         |             |             |                |
| ENSG00000090013                                | 985.7313477                                         | 1193.913069 | 753.8825789 |                |
| 1172.342785                                    | 1443.898606                                         | 1636.667486 | 977.842332  |                |
| 1417.636293                                    | -0.53570559                                         | 0.006364556 | 0.044104701 | BLVRB          |
| 19                                             | 40447765                                            | 40465840    | - 1689      |                |
| protein_coding                                 | biliverdin reductase B [Source:HGNC                 |             |             |                |
| Symbol;Acc:HGNC:1063]                          | -                                                   | 852 1288    | 771 1167    | 1580           |
| 1668                                           | 27.58701163                                         | 33.62173892 | 21.14594919 |                |
| 33.40738045                                    | 40.76486751                                         | 46.10122149 |             |                |
| ENSG00000184900                                | 4502.894842                                         | 4693.153626 | 5205.798768 |                |
| 3603.422082                                    | 3788.863052                                         | 3973.922854 | 4800.615745 |                |
| 3788.735996                                    | 0.341578277                                         | 0.006382402 | 0.044208325 | SUM03          |
| 21                                             | 44805617                                            | 44818779    | - 2732      |                |
| protein_coding                                 | small ubiquitin-like modifier 3 [Source:HGNC        |             |             |                |
| Symbol;Acc:HGNC:11124]                         | -                                                   | 3892 5063   | 5324 3587   | 4146           |
| 4050                                           | 77.90885995                                         | 81.70736223 | 90.27340163 |                |
| 63.48218965                                    | 66.13132138                                         | 69.20227374 |             |                |
| ENSG00000204628                                | 24067.11678                                         | 27432.19206 | 24617.05293 |                |
| 29608.93852                                    | 30534.80008                                         | 36931.97094 | 25372.12059 |                |
| 32358.56985                                    | -0.350880413                                        | 0.006389778 | 0.044239376 | RACK1          |
| 5                                              | 181236909                                           | 181248096   | - 5990      |                |
| protein_coding                                 | receptor for activated C kinase 1 [Source:HGNC      |             |             |                |
| Symbol;Acc:HGNC:4399]                          | -                                                   | 20802 29594 | 25176 29474 | 33413          |
| 37639                                          | 189.9209974                                         | 217.826546  | 194.6983914 |                |
| 237.9104253                                    | 243.0788909                                         | 293.3305455 |             |                |
| ENSG00000250954                                | 0 0.926951141                                       | 0           | 24.10987733 |                |
| 2.741579632                                    | 10.79337071                                         | 0.308983714 |             |                |
| 12.54827589                                    | -5.105635072                                        | 0.006393416 | 1           | AC016687.3     |



|                                               |                                         |                                     |                        |                    |             |                |
|-----------------------------------------------|-----------------------------------------|-------------------------------------|------------------------|--------------------|-------------|----------------|
|                                               | 15.02556661                             | 15.13319494                         | 19.43483755            | 17.08971272        |             |                |
|                                               | 18.76401339                             |                                     |                        |                    |             |                |
| ENSG00000228526                               | 168.9164047                             | 118.649746                          | 173.0703197            |                    |             |                |
| 37.16939421                                   | 55.74545252                             | 110.8773537                         | 153.5454901            |                    |             |                |
| 67.93073348                                   | 1.175903434                             | 0.006451085                         | 0.044522683            |                    |             |                |
| MIR34AHG                                      | 1                                       | 9148011                             | 9198906                | -                  | 8702        | lincRNA MIR34A |
| host gene [Source:HGNC Symbol;Acc:HGNC:51913] |                                         |                                     |                        | -                  | 146         | 128            |
|                                               | 177                                     | 37                                  | 61                     | 113                | 0.917547359 | 0.648522202    |
|                                               | 0.942229383                             | 0.20558142                          | 0.305470555            | 0.6061853          |             |                |
| ENSG00000138650                               | 150.4050178                             | 152.0199871                         | 123.2026004            |                    |             |                |
| 300.3688884                                   | 219.3263706                             | 211.9425522                         | 141.8758685            |                    |             |                |
| 243.8792704                                   | -0.781508839                            | 0.006458156                         | 0.044551365            |                    |             | PCDH10         |
|                                               | 4                                       | 133149315                           | 133208606              | +                  | 10161       |                |
| protein_coding                                | protocadherin 10                        | [Source:HGNC Symbol;Acc:HGNC:13404] |                        |                    |             |                |
|                                               | -                                       | 130                                 | 164                    | 126                | 299         | 240            |
|                                               | 0.69968347                              | 0.711608873                         | 0.574429255            | 1.422774109        |             |                |
| 1.029279654                                   | 0.992346485                             |                                     |                        |                    |             |                |
| ENSG00000272721                               | 3.470885027                             | 8.342560268                         | 15.64477466            | 0                  |             |                |
|                                               | 0                                       | 0                                   | 9.152739984            | 0                  | 5.689637473 |                |
| 0.006462651                                   | 1                                       | AC131235.3                          | 3                      | 184134019          |             |                |
| 184135238                                     | -                                       | 386                                 | antisense              | "novel transcript, |             |                |
| antisense to EIF2B5"                          | -                                       | 3                                   | 9                      | 16                 | 0           | 0              |
|                                               | 0                                       | 0.425038884                         | 1.027990646            | 1.920149899        | 0           |                |
|                                               | 0                                       |                                     |                        |                    |             |                |
| ENSG00000238260                               | 0                                       | 0                                   | 0                      | 12.05493866        | 6.397019142 |                |
|                                               | 8.830939675                             | 0                                   | 9.09429916             | -5.604095451       |             |                |
| 0.006476896                                   | 1                                       | AL513320.1                          | 1                      | 3623190            | 3624743     | -              |
|                                               | 622                                     | antisense                           | novel transcript       | -                  | 0           |                |
|                                               | 0                                       | 0                                   | 12                     | 7                  | 9           | 0              |
|                                               | 0.932807604                             | 0.490417832                         | 0.675457706            |                    |             |                |
| ENSG00000227036                               | 122.6379376                             | 100.1107232                         | 155.4699482            |                    |             |                |
| 36.16481599                                   | 79.50580934                             | 53.96685357                         | 126.0728697            |                    |             |                |
| 56.5458263                                    | 1.154322645                             | 0.006493417                         | 0.044774411            |                    |             |                |
| LINC00511                                     | 17                                      | 72290091                            | 72640472               | -                  | 27605       |                |
|                                               | processed_transcript                    | long intergenic                     | non-protein coding RNA |                    |             |                |
| 511 [Source:HGNC Symbol;Acc:HGNC:43564]       | -                                       | 106                                 | 108                    | 159                |             |                |
|                                               | 36                                      | 87                                  | 55                     | 0.209996872        | 0.172492399 |                |
| 0.266815975                                   | 0.063054483                             | 0.137337804                         | 0.093008143            |                    |             |                |
| ENSG00000103888                               | 683.7643503                             | 200.2214464                         | 847.7512268            |                    |             |                |
| 244.112508                                    | 116.0602044                             | 146.2011124                         | 577.2456745            |                    |             |                |
| 168.7912749                                   | 1.774051907                             | 0.006511574                         | 0.044863207            |                    |             | CEMIP          |
|                                               | 15                                      | 80779343                            | 80951776               | +                  | 7621        |                |
| protein_coding                                | cell migration inducing hyaluronidase 1 | [Source:HGNC Symbol;Acc:HGNC:29213] |                        |                    |             |                |
|                                               | -                                       | 591                                 | 216                    | 867                | 243         | 127            |
|                                               | 149                                     | 4.241019135                         | 1.249613613            | 5.269987579        |             |                |
| 1.54168458                                    | 0.726190155                             | 0.912683801                         |                        |                    |             |                |
| ENSG00000101457                               | 1052.835125                             | 1161.469779                         | 1070.689266            |                    |             |                |
| 1340.107348                                   | 1487.76388                              | 1503.222176                         | 1094.998057            |                    |             |                |
| 1443.697801                                   | -0.39864098                             | 0.006512164                         | 0.044863207            |                    |             |                |
| DNTTIP1 20                                    | 45791937                                | 45811427                            | +                      | 1883               |             |                |

|                                                 |                                                   |                                           |             |                    |             |        |
|-------------------------------------------------|---------------------------------------------------|-------------------------------------------|-------------|--------------------|-------------|--------|
| protein_coding                                  | deoxynucleotidyltransferase terminal interacting  |                                           |             |                    |             |        |
| protein 1 [Source:HGNC Symbol;Acc:HGNC:16160]   | -                                                 | 910                                       | 1253        |                    |             |        |
| 1095                                            | 1334                                              | 1628                                      | 1532        | 26.42930757        | 29.33828404 |        |
| 26.93805622                                     | 34.25363976                                       | 37.67581696                               | 37.97995809 |                    |             |        |
| ENSG00000181873                                 | 190.8986765                                       | 288.2818048                               | 345.1628409 |                    |             |        |
| 526.3989883                                     | 393.8736072                                       | 423.8851044                               | 274.7811074 |                    |             |        |
| 448.0525666                                     | -0.703078501                                      | 0.006517041                               | 0.044876577 |                    |             | IBA57  |
| 1                                               | 228165815                                         | 228182257                                 | +           | 10219              |             |        |
| protein_coding                                  | "IBA57, iron-sulfur cluster assembly [Source:HGNC |                                           |             |                    |             |        |
| Symbol;Acc:HGNC:27302]"                         | -                                                 | 165                                       | 311         | 353                | 524         | 431    |
| 432                                             | 0.883019426                                       | 1.341794316                               | 1.60017972  |                    |             |        |
| 2.479271593                                     | 1.837923661                                       | 1.973428443                               |             |                    |             |        |
| ENSG00000206897                                 | 5.784808379                                       | 11.12341369                               | 9.777984162 | 0                  |             |        |
| 0                                               | 0                                                 | 8.895402077                               | 0           | 5.647841006        |             |        |
| 0.006519692                                     | 1                                                 | SNORA9B 12                                | 123616708   | 123616840          |             |        |
| +                                               | 133                                               | snoRNA "small nucleolar RNA, H/ACA box 9B |             |                    |             |        |
| [Source:HGNC Symbol;Acc:HGNC:52223]"            | -                                                 | 5                                         | 12          | 10                 |             |        |
| 0                                               | 0                                                 | 0                                         | 2.055952497 | 3.977988864        |             |        |
| 3.48297867                                      | 0                                                 | 0                                         | 0           |                    |             |        |
| ENSG00000260742                                 | 11.56961676                                       | 9.269511408                               | 5.866790497 | 0                  |             |        |
| 0                                               | 0                                                 | 8.901972888                               | 0           | 5.645748317        |             |        |
| 0.006519817                                     | 1                                                 | AC009962.1                                | 2           | 181887851          |             |        |
| 181891663                                       | -                                                 | 3813                                      | antisense   | "novel transcript, |             |        |
| antisense to SSFA2"                             | -                                                 | 10                                        | 10          | 6                  | 0           | 0      |
| 0                                               | 0.143426007                                       | 0.115629102                               | 0.072893181 | 0                  |             |        |
| 0                                               | 0                                                 |                                           |             |                    |             |        |
| ENSG00000173209                                 | 573.8529912                                       | 397.6620394                               | 523.1221526 |                    |             |        |
| 257.1720248                                     | 357.3192121                                       | 347.3502939                               | 498.2123944 |                    |             |        |
| 320.6138436                                     | 0.634525026                                       | 0.006525426                               | 0.044914089 |                    |             | AHSA2P |
| 2                                               | 61177418                                          | 61191203                                  | +           | 9083               |             |        |
| transcribed_unitary_pseudogene                  | "activator of HSP90 ATPase homolog 2,             |                                           |             |                    |             |        |
| pseudogene [Source:HGNC Symbol;Acc:HGNC:20437]" | -                                                 | 496                                       | 429         |                    |             |        |
| 535                                             | 256                                               | 391                                       | 354         | 2.986393798        | 2.082389359 |        |
| 2.728518631                                     | 1.362736435                                       | 1.875884267                               | 1.81936562  |                    |             |        |
| ENSG00000183763                                 | 569.2251445                                       | 516.3117855                               | 543.6559194 |                    |             |        |
| 367.6756293                                     | 388.3904479                                       | 383.6552681                               | 543.0642831 |                    |             |        |
| 379.9071151                                     | 0.514981206                                       | 0.006529057                               | 0.044918853 |                    |             | TRAIP  |
| 3                                               | 49828599                                          | 49856574                                  | -           | 3263               |             |        |
| protein_coding                                  | TRAF interacting protein [Source:HGNC             |                                           |             |                    |             |        |
| Symbol;Acc:HGNC:30764]"                         | -                                                 | 492                                       | 557         | 556                | 366         | 425    |
| 391                                             | 8.245988821                                       | 7.526136302                               | 7.893328431 |                    |             |        |
| 5.42331997                                      | 5.675844047                                       | 5.593784348                               |             |                    |             |        |
| ENSG00000106034                                 | 385.268238                                        | 344.8258244                               | 322.6734773 |                    |             |        |
| 158.7233591                                     | 286.9520015                                       | 179.5624401                               | 350.9225132 |                    |             |        |
| 208.4126002                                     | 0.749960575                                       | 0.006547847                               | 0.04502786  |                    |             | CPED1  |
| 7                                               | 120988677                                         | 121297444                                 | +           | 7705               |             |        |
| protein_coding                                  | cadherin like and PC-esterase domain containing 1 |                                           |             |                    |             |        |
| [Source:HGNC Symbol;Acc:HGNC:26159]"            | -                                                 | 333                                       | 372         | 330                |             |        |
| 158                                             | 314                                               | 183                                       | 2.363558213 | 2.128649979        |             |        |
| 1.984009524                                     | 0.991483886                                       | 1.775888123                               | 1.10872664  |                    |             |        |



|                      |                                                                                      |             |                |              |      |
|----------------------|--------------------------------------------------------------------------------------|-------------|----------------|--------------|------|
| ENSG00000203485      | 2826.457374                                                                          | 3503.875312 | 3448.695014    |              |      |
| 3920.868801          | 4067.590314                                                                          | 4858.979252 | 3259.6759      |              |      |
| 4282.479456          | -0.393438631                                                                         | 0.006557205 | 0.04507194     | INF2         |      |
| 14                   | 104689606                                                                            | 104722535   | + 9488         |              |      |
| protein_coding       | "inverted formin, FH2 and WH2 domain containing [Source:HGNC Symbol;Acc:HGNC:23791]" |             |                |              |      |
|                      | -                                                                                    | 2443        | 3780           | 3527         |      |
| 3903                 | 4451                                                                                 | 4952        | 14.0813244     | 17.56511841  |      |
| 17.22000366          | 19.88955616                                                                          | 20.44285348 | 24.36419102    |              |      |
| ENSG00000003756      | 1634.786848                                                                          | 1582.305597 | 1752.214762    |              |      |
| 1285.860124          | 1217.261357                                                                          | 1314.828796 | 1656.435736    |              |      |
| 1272.650092          | 0.380331877                                                                          | 0.006580623 | 0.045212575    | RBM5         |      |
| 3                    | 50088908                                                                             | 50119021    | + 10368        |              |      |
| protein_coding       | RNA binding motif protein 5 [Source:HGNC Symbol;Acc:HGNC:9902]                       |             |                |              |      |
|                      | -                                                                                    | 1413        | 1707           | 1792         | 1280 |
| 1340                 | 7.453184739                                                                          | 7.25892803  | 8.006550968    | 1332         |      |
| 5.969200925          | 5.598450389                                                                          | 6.03331285  |                |              |      |
| ENSG00000214866      | 13.88354011                                                                          | 11.12341369 | 0              | 55.25180221  |      |
| 61.22861179          | 20.60552591                                                                          | 8.335651266 | 45.6953133     |              |      |
| -2.464050197         | 0.006583949                                                                          | 0.045215109 | DCDC2C         | 2            |      |
| 3703592              | 3847411                                                                              | + 2242      | protein_coding | doublecortin |      |
| domain containing 2C | [Source:HGNC Symbol;Acc:HGNC:32696]                                                  |             |                |              |      |
|                      | -                                                                                    |             |                |              |      |
| 12                   | 12                                                                                   | 0           | 55             | 67           | 21   |
| 0.23598239           | 0                                                                                    | 1.186119095 | 1.302260273    | 0.292711881  |      |
| 0.437249904          |                                                                                      |             |                |              |      |
| ENSG00000108588      | 3867.722882                                                                          | 3490.897996 | 3960.083585    |              |      |
| 2891.176123          | 2847.587378                                                                          | 3161.476404 | 3772.901488    |              |      |
| 2966.746635          | 0.346731315                                                                          | 0.006587318 | 0.045217927    | CCDC47       |      |
| 17                   | 63745250                                                                             | 63776351    | - 4537         |              |      |
| protein_coding       | coiled-coil domain containing 47 [Source:HGNC Symbol;Acc:HGNC:24856]                 |             |                |              |      |
|                      | -                                                                                    | 3343        | 3766           | 4050         | 2878 |
| 3222                 | 40.29603454                                                                          | 36.5970007  | 41.35125547    | 3116         |      |
| 30.67066743          | 29.92865965                                                                          | 33.15147015 |                |              |      |
| ENSG00000277791      | 3371.386323                                                                          | 3138.656563 | 3108.421165    |              |      |
| 2746.516859          | 2407.106917                                                                          | 2359.823324 | 3206.154684    |              |      |
| 2504.482367          | 0.356281982                                                                          | 0.006592831 | 0.045225711    | PSMB3        |      |
| 17                   | 38752736                                                                             | 38764231    | + 1179         |              |      |
| protein_coding       | proteasome subunit beta 3 [Source:HGNC Symbol;Acc:HGNC:9540]                         |             |                |              |      |
|                      | -                                                                                    | 2914        | 3386           | 3179         | 2734 |
| 2405                 | 135.1669316                                                                          | 126.6213987 | 124.9048145    | 2634         |      |
| 112.1207313          | 97.35551607                                                                          | 95.22419533 |                |              |      |
| ENSG00000198805      | 1011.184505                                                                          | 1212.452092 | 991.487594     |              |      |
| 1369.240117          | 1487.76388                                                                           | 1437.480736 | 1071.708064    |              |      |
| 1431.494911          | -0.417244223                                                                         | 0.006594368 | 0.045225711    | PNP          |      |
| 14                   | 20468954                                                                             | 20477094    | + 4139         |              |      |
| protein_coding       | purine nucleoside phosphorylase [Source:HGNC Symbol;Acc:HGNC:7892]                   |             |                |              |      |
|                      | -                                                                                    | 874         | 1308           | 1014         | 1363 |
| 1465                 | 11.54810487                                                                          | 13.93305256 | 11.34867044    | 1628         |      |
| 15.92214761          | 17.14026657                                                                          | 16.52297456 |                |              |      |
| ENSG00000169564      | 2090.629748                                                                          | 2928.238654 | 2871.793948    |              |      |
| 3670.728823          | 3062.344449                                                                          | 4035.739432 | 2630.220783    |              |      |

|                                     |                                                 |             |             |             |
|-------------------------------------|-------------------------------------------------|-------------|-------------|-------------|
| 3589.604235                         | -0.448175259                                    | 0.006602323 | 0.045259963 | PCBP1       |
| 2                                   | 70087454                                        | 70089203    | + 1750      |             |
| protein_coding                      | poly(rC) binding protein 1 [Source:HGNC         |             |             |             |
| Symbol;Acc:HGNC:8647]               | -                                               | 1807 3159   | 2937 3654   | 3351        |
| 4113                                | 56.46961368                                     | 79.58762321 | 77.74426349 |             |
| 100.9559014                         | 83.44397358                                     | 109.7151741 |             |             |
| ENSG00000159202                     | 4085.231677                                     | 4649.586922 | 4086.219581 |             |
| 5441.800229                         | 5527.938398                                     | 5180.817943 | 4273.679394 |             |
| 5383.518857                         | -0.332955721                                    | 0.006637615 | 0.0454815   | UBE2Z       |
| 17                                  | 48908369                                        | 48929056    | + 5753      |             |
| protein_coding                      | ubiquitin conjugating enzyme E2 Z [Source:HGNC  |             |             |             |
| Symbol;Acc:HGNC:25847]              | -                                               | 3531 5016   | 4179 5417   | 6049        |
| 5280                                | 33.56588144                                     | 38.44121553 | 33.64964237 |             |
| 45.52664826                         | 45.81923229                                     | 42.84356334 |             |             |
| ENSG00000075391                     | 2504.822028                                     | 2313.670048 | 1850.972402 |             |
| 3067.98189                          | 2907.90213                                      | 2830.806774 | 2223.154826 |             |
| 2935.563598                         | -0.401292755                                    | 0.006649499 | 0.045542512 | RASAL2      |
| 1                                   | 178094141                                       | 178484147   | + 16044     |             |
| protein_coding                      | RAS protein activator like 2 [Source:HGNC       |             |             |             |
| Symbol;Acc:HGNC:9874]               | -                                               | 2165 2496   | 1893 3054   | 3182        |
| 2885                                | 7.37972129                                      | 6.859080276 | 5.465632366 |             |
| 9.203597043                         | 8.642633959                                     | 8.394197826 |             |             |
| ENSG00000156675                     | 48.59239038                                     | 62.10572644 | 56.71230814 |             |
| 7.032047554                         | 0                                               | 25.51160351 | 55.80347498 | 10.84788369 |
| 2.367965339                         | 0.006656228                                     | 0.045547229 |             | RAB11FIP1   |
| 8                                   | 37858618                                        | 37899467    | - 9602      |             |
| protein_coding                      | RAB11 family interacting protein 1 [Source:HGNC |             |             |             |
| Symbol;Acc:HGNC:30265]              | -                                               | 42 67       | 58 7        | 0           |
| 26                                  | 0.239211636                                     | 0.307643015 | 0.279813554 |             |
| 0.03524825                          | 0                                               | 0.126403088 |             |             |
| ENSG00000080031                     | 126.1088227                                     | 101.9646255 | 60.6235018  |             |
| 236.0758822                         | 125.1988032                                     | 225.6795695 | 96.23231665 |             |
| 195.6514183                         | -1.0254423                                      | 0.006656955 | 0.045547229 | PTPRH       |
| 19                                  | 55181248                                        | 55209506    | - 4344      |             |
| protein_coding                      | "protein tyrosine phosphatase, receptor type H  |             |             |             |
| [Source:HGNC Symbol;Acc:HGNC:9672]" | -                                               |             | 109 110     | 62          |
| 235                                 | 137 230                                         | 1.372244169 | 1.116443698 |             |
| 0.661156586                         | 2.615647781                                     | 1.374324689 | 2.4716334   |             |
| ENSG00000049541                     | 1587.351419                                     | 1367.252933 | 1519.498739 |             |
| 918.1844949                         | 1222.744516                                     | 1149.003373 | 1491.367697 |             |
| 1096.644128                         | 0.443012437                                     | 0.006659126 | 0.045547229 | RFC2        |
| 7                                   | 74231499                                        | 74254458    | - 2211      |             |
| protein_coding                      | replication factor C subunit 2 [Source:HGNC     |             |             |             |
| Symbol;Acc:HGNC:9970]               | -                                               | 1372 1475   | 1554 914    | 1338        |
| 1171                                | 33.93595549                                     | 29.41285864 | 32.55852544 |             |
| 19.98750888                         | 26.37096174                                     | 24.72374117 |             |             |
| ENSG00000149925                     | 187.4277915                                     | 439.3748408 | 398.9417538 |             |
| 515.3486279                         | 504.4506523                                     | 749.6486569 | 341.9147953 |             |
| 589.815979                          | -0.784342109                                    | 0.006666476 | 0.045573613 | ALDOA       |
| 16                                  | 30064164                                        | 30070457    | + 3916      |             |

|                                                    |                                                       |             |             |             |                |        |       |
|----------------------------------------------------|-------------------------------------------------------|-------------|-------------|-------------|----------------|--------|-------|
| protein_coding                                     | "aldolase, fructose-bisphosphate A [Source:HGNC       |             |             |             |                |        |       |
| Symbol;Acc:HGNC:414]"                              | -                                                     | 162         | 474         | 408         | 513            | 552    |       |
| 764                                                | 2.262387769                                           | 5.336661006 | 4.826362476 |             |                |        |       |
| 6.333968489                                        | 6.142638994                                           | 9.107448231 |             |             |                |        |       |
| ENSG00000166004                                    | 710.3744689                                           | 630.3267758 | 707.9260533 |             |                |        |       |
| 572.6095866                                        | 339.9558744                                           | 448.4154924 | 682.875766  |             |                |        |       |
| 453.6603178                                        | 0.590487695                                           | 0.006668946 | 0.045573613 |             |                | CEP295 |       |
| 11                                                 | 93661639                                              | 93730358    | +           | 9495        |                |        |       |
| protein_coding                                     | centrosomal protein 295 [Source:HGNC                  |             |             |             |                |        |       |
| Symbol;Acc:HGNC:29366]"                            | -                                                     | 614         | 680         | 724         | 570            | 372    |       |
| 457                                                | 3.536454826                                           | 3.157533025 | 3.532206236 |             |                |        |       |
| 2.902559312                                        | 1.707287138                                           | 2.246814753 |             |             |                |        |       |
| ENSG00000134874                                    | 1647.513426                                           | 1694.466685 | 1854.883595 |             |                |        |       |
| 1205.493866                                        | 1501.471779                                           | 1171.57133  | 1732.287902 |             |                |        |       |
| 1292.845658                                        | 0.421985938                                           | 0.006676739 | 0.045592654 |             |                | DZIP1  |       |
| 13                                                 | 95578202                                              | 95644703    | -           | 8470        |                |        |       |
| protein_coding                                     | DAZ interacting zinc finger protein 1 [Source:HGNC    |             |             |             |                |        |       |
| Symbol;Acc:HGNC:20908]"                            | -                                                     | 1424        | 1828        | 1897        | 1200           | 1643   |       |
| 1194                                               | 9.194355499                                           | 9.515393198 | 10.37495869 |             |                |        |       |
| 6.850133765                                        | 8.453036628                                           | 6.58062211  |             |             |                |        |       |
| ENSG00000154767                                    | 739.2985108                                           | 926.0241897 | 744.1045947 |             |                |        |       |
| 1213.530492                                        | 1086.579394                                           | 1019.482925 | 803.1424317 |             |                |        |       |
| 1106.530937                                        | -0.461618258                                          | 0.006677697 | 0.045592654 |             |                | XPC    |       |
| 3                                                  | 14145147                                              | 14178783    | -           | 4798        |                |        |       |
| protein_coding                                     | "XPC complex subunit, DNA damage recognition and      |             |             |             |                |        |       |
| repair factor [Source:HGNC Symbol;Acc:HGNC:12816]" | -                                                     |             |             |             |                | 639    |       |
| 999                                                | 761                                                   | 1208        | 1189        | 1039        | 7.283419546    |        |       |
| 9.17992647                                         | 7.347284705                                           | 12.17328829 | 10.79891714 |             |                |        |       |
| 10.1088404                                         |                                                       |             |             |             |                |        |       |
| ENSG00000099840                                    | 26.61011854                                           | 40.7858502  | 43.02313031 |             |                |        |       |
| 3.013734666                                        | 10.96631853                                           | 10.79337071 | 36.80636635 |             |                |        |       |
| 8.25780797                                         | 2.153574822                                           | 0.006687024 | 0.045635955 |             |                | IZUM04 |       |
| 19                                                 | 2096429                                               | 2099593     | +           | 2770        | protein_coding | IZUM0  |       |
| family member 4                                    | [Source:HGNC Symbol;Acc:HGNC:26950]"                  |             |             |             |                | -      | 23    |
| 44                                                 | 44                                                    | 3           | 12          | 11          | 0.45409088     |        |       |
| 0.700336668                                        | 0.735826396                                           | 0.052365192 | 0.188781779 |             |                |        |       |
| 0.185378324                                        |                                                       |             |             |             |                |        |       |
| ENSG00000198786                                    | 31045.90961                                           | 30916.6014  | 37294.20939 |             |                |        |       |
| 43288.28017                                        | 36057.25532                                           | 51754.21257 | 33085.57347 |             |                |        |       |
| 43699.91602                                        | -0.401413231                                          | 0.006697442 | 0.045686659 |             |                | MT-ND5 |       |
| MT                                                 | 12337                                                 | 14148       | +           | 1812        | protein_coding |        |       |
| mitochondrially                                    | encoded NADH:ubiquinone oxidoreductase core subunit 5 |             |             |             |                |        |       |
| [Source:HGNC Symbol;Acc:HGNC:7461]"                | -                                                     |             |             |             | 26834          | 33353  | 38141 |
| 43091                                              | 39456                                                 | 52745       | 809.8823509 | 811.5413781 |                |        |       |
| 975.0712195                                        | 1149.819305                                           | 948.8847334 | 1358.842555 |             |                |        |       |
| ENSG00000140563                                    | 341.3036943                                           | 406.0045997 | 493.7882002 |             |                |        |       |
| 266.2132288                                        | 308.8846386                                           | 145.2198969 | 413.6988314 |             |                |        |       |
| 240.1059214                                        | 0.784949436                                           | 0.006702314 | 0.045699501 |             |                | MCTP2  |       |
| 15                                                 | 94231538                                              | 94483952    | +           | 12978       |                |        |       |
| protein_coding                                     | multiple C2 and transmembrane domain containing 2     |             |             |             |                |        |       |

|                                     |                                               |             |                                     |              |
|-------------------------------------|-----------------------------------------------|-------------|-------------------------------------|--------------|
| [Source:HGNC Symbol;Acc:HGNC:25636] | -                                             | 295         | 438                                 | 505          |
| 265                                 | 338                                           | 148         | 1.243108279                         | 1.48799098   |
| 1.802544786                         | 0.987277684                                   | 1.134925955 | 0.532353338                         |              |
| ENSG00000237548                     | 13.88354011                                   | 12.05036483 | 1.955596832                         | 0            |
| 0                                   | 0                                             | 9.296500591 | 0                                   | 5.707917209  |
| 0.006726048                         | 1                                             | TTL11-IT1   | 9                                   | 121884636    |
| 121963719                           | -                                             | 1052        | lincRNA TTL11 intronic transcript 1 |              |
| [Source:HGNC Symbol;Acc:HGNC:24214] | -                                             | 12          | 13                                  | 2            |
| 0                                   | 0                                             | 0           | 0.623821328                         | 0.544830699  |
| 0.088067712                         | 0                                             | 0           | 0                                   |              |
| ENSG00000169255                     | 864.2503718                                   | 676.6743328 | 637.5245673                         |              |
| 420.918275                          | 582.1287419                                   | 475.8895269 | 726.1497573                         |              |
| 492.978848                          | 0.557426933                                   | 0.006755154 | 0.04603925                          |              |
| B3GALNT1                            | 3                                             | 161083883   | 161105384                           | -            |
| protein_coding                      | "beta-1,3-N-acetylgalactosaminyltransferase 1 |             |                                     | 4183         |
| (globoside blood group)             | [Source:HGNC Symbol;Acc:HGNC:918]"            |             |                                     | -            |
| 747                                 | 730                                           | 652         | 419                                 | 637          |
| 7.694297132                         | 7.220415452                                   | 4.84314392  | 6.636057883                         |              |
| 5.412524932                         |                                               |             |                                     |              |
| ENSG00000173581                     | 565.7542594                                   | 974.225649  | 688.370085                          |              |
| 1103.026888                         | 1060.991318                                   | 1095.03652  | 742.7833311                         |              |
| 1086.351575                         | -0.547174196                                  | 0.006764385 | 0.046081618                         |              |
| CCDC106                             | 19                                            | 55641062    | 55653161                            | + 2709       |
| protein_coding                      | coiled-coil domain containing 106             |             |                                     | [Source:HGNC |
| Symbol;Acc:HGNC:30181]              | -                                             | 489         | 1051                                | 704          |
| 1116                                | 9.871759511                                   | 17.1051808  | 12.03832628                         | 1098         |
| 19.59722377                         | 18.67591172                                   | 19.23097155 |                                     | 1161         |
| ENSG00000260219                     | 27.76708022                                   | 50.98231275 | 21.51156516                         |              |
| 82.37541421                         | 95.95528713                                   | 78.49724156 | 33.42031937                         |              |
| 85.6093143                          | -1.353020076                                  | 0.006769998 | 0.046094259                         |              |
| AC106782.2                          | 16                                            | 30355441    | 30357104                            | + 992        |
| lincRNA                             | uncharacterized LOC101928707                  |             |                                     | [Source:NCBI |
| gene;Acc:101928707]                 | -                                             | 24          | 55                                  | 22           |
| 80                                  | 1.323104914                                   | 2.444471484 | 1.027338265                         | 82           |
| 3.99671699                          | 4.612498359                                   | 3.764647787 |                                     | 105          |
| ENSG00000172216                     | 2139.222138                                   | 4870.201294 | 3885.770906                         |              |
| 5915.961149                         | 6940.765769                                   | 7415.045681 | 3631.731446                         |              |
| 6757.257533                         | -0.895632546                                  | 0.006772271 | 0.046094259                         | CEBPB        |
| 20                                  | 50190734                                      | 50192689    | + 1956                              |              |
| protein_coding                      | CCAAT enhancer binding protein beta           |             |                                     | [Source:HGNC |
| Symbol;Acc:HGNC:1834]               | C/EBP                                         | 1849        | 5254                                | 3974         |
| 7557                                | 51.69669431                                   | 118.428213  | 94.11556811                         | 5889         |
| 145.5706832                         | 169.2066883                                   | 180.3543442 |                                     | 7595         |
| ENSG00000198546                     | 236.0201818                                   | 221.5413227 | 225.8714341                         |              |
| 419.9136968                         | 286.0381416                                   | 372.8618974 | 227.8109795                         |              |
| 359.6045786                         | -0.658385291                                  | 0.006777057 | 0.046106305                         | ZNF511       |
| 10                                  | 133308475                                     | 133313162   | + 2728                              |              |
| protein_coding                      | zinc finger protein 511                       |             |                                     | [Source:HGNC |
| Symbol;Acc:HGNC:28445]              | -                                             | 204         | 239                                 | 231          |
| 380                                 | 4.089597006                                   | 3.862668989 | 3.922564285                         | 418          |
|                                     |                                               |             |                                     | 313          |

|                                     |                                               |             |             |                  |             |               |     |
|-------------------------------------|-----------------------------------------------|-------------|-------------|------------------|-------------|---------------|-----|
| 7.408548567                         | 4.999868351                                   | 6.50257345  |             |                  |             |               |     |
| ENSG00000273230                     | 255.6885303                                   | 420.8358179 | 387.2081728 |                  |             |               |     |
| 556.536335                          | 501.7090727                                   | 579.898372  | 354.577507  |                  |             |               |     |
| 546.0479266                         | -0.620701418                                  | 0.006780335 | 0.046108088 |                  |             |               |     |
| AC102953.2                          | 7                                             | 1464497     | 1467522     | -                | 3026        | lincRNA novel |     |
| transcript                          | -                                             | 221         | 454         | 396              | 554         | 549           | 591 |
|                                     | 3.994091987                                   | 6.614863505 | 6.062178473 |                  | 8.852013295 |               |     |
|                                     | 7.906094817                                   | 9.117265314 |             |                  |             |               |     |
| ENSG00000100207                     | 956.8073058                                   | 1027.061864 | 1009.087965 |                  |             |               |     |
| 1475.725408                         | 1192.58714                                    | 1332.490675 | 997.6523785 |                  |             |               |     |
| 1333.601075                         | -0.418270477                                  | 0.006802639 | 0.046239194 |                  |             | TCF20         |     |
| 22                                  | 42160013                                      | 42343616    | -           |                  | 7548        |               |     |
| protein_coding                      | transcription factor 20 [Source:HGNC          |             |             |                  |             |               |     |
| Symbol;Acc:HGNC:11631]              | -                                             | 827         | 1108        | 1032             | 1469        | 1305          |     |
| 1358                                | 5.991952071                                   | 6.47204945  | 6.333594599 |                  |             |               |     |
| 9.410032444                         | 7.534201271                                   | 8.398735693 |             |                  |             |               |     |
| ENSG00000160948                     | 1332.81985                                    | 1393.207565 | 1337.628233 |                  |             |               |     |
| 2011.1656                           | 1676.019015                                   | 1660.216659 | 1354.551883 |                  |             |               |     |
| 1782.467092                         | -0.39583746                                   | 0.006816802 | 0.046314871 |                  |             | VPS28         |     |
| 8                                   | 144423601                                     | 144428563   | -           |                  | 3769        |               |     |
| protein_coding                      | "VPS28, ESCRT-I subunit [Source:HGNC          |             |             |                  |             |               |     |
| Symbol;Acc:HGNC:18178]"             | -                                             | 1152        | 1503        | 1368             | 2002        | 1834          |     |
| 1692                                | 16.71556476                                   | 17.5819403  | 16.81366599 |                  |             |               |     |
| 25.68260972                         | 21.20468336                                   | 20.95657264 |             |                  |             |               |     |
| ENSG00000123104                     | 467.412517                                    | 445.8634987 | 610.1462117 |                  |             |               |     |
| 266.2132288                         | 394.787467                                    | 323.8011214 | 507.8074091 |                  |             |               |     |
| 328.2672724                         | 0.628933946                                   | 0.006832738 | 0.04640252  |                  |             | ITPR2         |     |
| 12                                  | 26336515                                      | 26833198    | -           |                  | 12750       |               |     |
| protein_coding                      | "inositol 1,4,5-trisphosphate receptor type 2 |             |             |                  |             |               |     |
| [Source:HGNC Symbol;Acc:HGNC:6181]" | -                                             |             | 404         | 481              | 624         |               |     |
| 265                                 | 432                                           | 330         | 1.732869641 | 1.663293344      |             |               |     |
| 2.267132281                         | 1.004932532                                   | 1.476495609 | 1.20823049  |                  |             |               |     |
| ENSG00000236591                     | 9.255693406                                   | 10.19646255 | 6.844588913 |                  | 0           |               |     |
| 0                                   | 0                                             | 8.765581623 | 0           | 5.624716329      |             |               |     |
| 0.006852297                         | 1                                             | AL357992.1  | 6           | 149027700        |             |               |     |
| 149032573                           | -                                             | 130         | antisense   | novel transcript |             |               |     |
| -                                   | 8                                             | 11          | 7           | 0                | 0           | 0             |     |
| 3.365436088                         | 3.730639557                                   | 2.494348571 | 0           | 0                | 0           |               |     |
| ENSG00000050438                     | 145.7771711                                   | 136.2618177 | 195.5596832 |                  |             |               |     |
| 83.37999243                         | 31.07123583                                   | 99.10276747 | 159.1995574 |                  |             |               |     |
| 71.18466524                         | 1.163454045                                   | 0.00685981  | 0.046565679 |                  |             | SLC4A8        |     |
| 12                                  | 51391317                                      | 51515763    | +           | 17980            |             |               |     |
| protein_coding                      | solute carrier family 4 member 8 [Source:HGNC |             |             |                  |             |               |     |
| Symbol;Acc:HGNC:11034]              | -                                             | 126         | 147         | 200              | 83          | 34            |     |
| 101                                 | 0.383244182                                   | 0.360463757 | 0.515279381 |                  |             |               |     |
| 0.223197652                         | 0.082403912                                   | 0.262227191 |             |                  |             |               |     |
| ENSG00000272764                     | 17.35442514                                   | 0.926951141 | 10.75578258 |                  | 0           |               |     |
| 0                                   | 0                                             | 9.679052951 | 0           | 5.763755358      |             |               |     |
| 0.006896314                         | 1                                             | AL596094.1  | 10          | 5813985          | 5814441     | +             |     |
| 276                                 | lincRNA novel transcript                      |             |             | -                | 15          | 1             |     |

|                                               |                                                      |             |             |                 |                |      |
|-----------------------------------------------|------------------------------------------------------|-------------|-------------|-----------------|----------------|------|
| 11                                            | 0                                                    | 0           | 0           | 2.972192197     | 0.159744118    |      |
| 1.846231085                                   | 0                                                    | 0           | 0           | 0               |                |      |
| ENSG00000153914                               | 2052.450013                                          | 1928.058373 | 1993.730971 |                 |                |      |
| 1628.421298                                   | 1472.228263                                          | 1545.414443 | 1991.413119 |                 |                |      |
| 1548.688001                                   | 0.362721257                                          | 0.006916198 | 0.046927619 |                 | SREK1          |      |
| 5                                             | 66139971                                             | 66183615    | +           | 18240           |                |      |
| protein_coding                                | splicing regulatory glutamic acid and lysine rich    |             |             |                 |                |      |
| protein 1 [Source:HGNC Symbol;Acc:HGNC:17882] | -                                                    | 1774        | 2080        |                 |                |      |
| 2039                                          | 1621                                                 | 1611        | 1575        | 5.31892044      | 5.027735926    |      |
| 5.1783911                                     | 4.296941067                                          | 3.848835097 | 4.030897548 |                 |                |      |
| ENSG00000182095                               | 2966.449737                                          | 4200.015619 | 5592.029142 |                 |                |      |
| 6996.887316                                   | 4836.146471                                          | 6768.424653 | 4252.831499 |                 |                |      |
| 6200.486147                                   | -0.543703801                                         | 0.006940284 | 0.047070153 |                 | TNRC18         |      |
| 7                                             | 5306790                                              | 5425414     | -           | 12572           | protein_coding |      |
| trinucleotide repeat containing               | 18 [Source:HGNC                                      |             |             |                 |                |      |
| Symbol;Acc:HGNC:11962]                        | -                                                    | 2564        | 4531        | 5719            | 6965           | 5292 |
| 6898                                          | 11.15342782                                          | 15.88999087 | 21.07260274 |                 |                |      |
| 26.78662297                                   | 18.34315606                                          | 25.61325973 |             |                 |                |      |
| ENSG00000214160                               | 1649.82735                                           | 1759.353265 | 1806.971473 |                 |                |      |
| 2902.226483                                   | 1940.12452                                           | 2261.701772 | 1738.717363 |                 |                |      |
| 2368.017592                                   | -0.445338341                                         | 0.006948456 | 0.047094793 |                 | ALG3           |      |
| 3                                             | 184242301                                            | 184249548   | -           | 3464            |                |      |
| protein_coding                                | "ALG3, alpha-1,3- mannosyltransferase [Source:HGNC   |             |             |                 |                |      |
| Symbol;Acc:HGNC:23056]"                       | -                                                    | 1426        | 1898        | 1848            | 2889           | 2123 |
| 2305                                          | 22.51315466                                          | 24.15751638 | 24.7130609  |                 |                |      |
| 40.32467492                                   | 26.70734451                                          | 31.06269141 |             |                 |                |      |
| ENSG00000116497                               | 1132.665481                                          | 984.4221116 | 1061.88908  |                 |                |      |
| 831.7907678                                   | 823.3877496                                          | 661.3392601 | 1059.658891 |                 |                |      |
| 772.1725925                                   | 0.456170348                                          | 0.006952046 | 0.047094793 |                 |                |      |
| S100PBP 1                                     | 32816767                                             | 32858879    | +           | 9194            |                |      |
| protein_coding                                | S100P binding protein [Source:HGNC                   |             |             |                 |                |      |
| Symbol;Acc:HGNC:25768]                        | -                                                    | 979         | 1062        | 1086            | 828            | 901  |
| 674                                           | 5.82335016                                           | 5.092768972 | 5.47176934  |                 |                |      |
| 4.354387292                                   | 4.270501604                                          | 3.422168843 |             |                 |                |      |
| ENSG00000131724                               | 2450.444829                                          | 2182.969937 | 2269.470124 |                 |                |      |
| 1645.499128                                   | 2047.046125                                          | 1399.213331 | 2300.96163  |                 |                |      |
| 1697.252861                                   | 0.438661787                                          | 0.006953159 | 0.047094793 |                 |                |      |
| IL13RA1 X                                     | 118727572                                            | 118794539   | +           | 4372            |                |      |
| protein_coding                                | interleukin 13 receptor subunit alpha 1 [Source:HGNC |             |             |                 |                |      |
| Symbol;Acc:HGNC:5974]                         | -                                                    | 2118        | 2355        | 2321            | 1638           | 2240 |
| 1426                                          | 26.49357195                                          | 23.74896657 | 24.59220345 |                 |                |      |
| 18.11485911                                   | 22.32679901                                          | 15.22598537 |             |                 |                |      |
| ENSG00000225806                               | 24.29619519                                          | 4.634755704 | 0.977798416 |                 | 0              |      |
| 0                                             | 0                                                    | 9.969583103 | 0           | 5.804665344     |                |      |
| 0.006966748                                   | 1                                                    | AL121917.1  | 20          | 58863528        |                |      |
| 58888809                                      | -                                                    | 1521        | antisense   | uncharacterized |                |      |
| LOC101927932 [Source:NCBI gene;Acc:101927932] | -                                                    | 21          | 5           |                 |                |      |
| 1                                             | 0                                                    | 0           | 0           | 0.755065789     | 0.144935492    |      |
| 0.030456027                                   | 0                                                    | 0           | 0           |                 |                |      |
| ENSG00000116754                               | 5691.094483                                          | 5000.901405 | 5269.355665 |                 |                |      |

|                                     |                                                                              |             |             |        |
|-------------------------------------|------------------------------------------------------------------------------|-------------|-------------|--------|
| 4556.766815                         | 4085.867512                                                                  | 3967.054345 | 5320.450517 |        |
| 4203.229557                         | 0.339965601                                                                  | 0.006973837 | 0.047198822 | SRSF11 |
| 1                                   | 70205682                                                                     | 70253052    | + 8473      |        |
| protein_coding                      | serine and arginine rich splicing factor 11                                  |             |             |        |
| [Source:HGNC Symbol;Acc:HGNC:10782] | -                                                                            | 4919        | 5395        | 5389   |
| 4536                                | 4471 4043                                                                    | 31.74931275 | 28.07295959 |        |
| 29.46276033                         | 25.88433763                                                                  | 22.99461069 | 22.27473627 |        |
| ENSG00000198732                     | 1392.981858                                                                  | 1479.414021 | 1813.816062 |        |
| 1011.61027                          | 1006.159725                                                                  | 1352.114986 | 1562.070647 |        |
| 1123.294993                         | 0.476041604                                                                  | 0.006974694 | 0.047198822 | SMOC1  |
| 14                                  | 69854131                                                                     | 70032366    | + 4369      |        |
| protein_coding                      | SPARC related modular calcium binding 1 [Source:HGNC Symbol;Acc:HGNC:20318]  |             |             |        |
|                                     | -                                                                            | 1204 1596   | 1855 1007   | 1101   |
| 1378                                | 15.07089885                                                                  | 16.10589266 | 19.66818683 |        |
| 11.14419345                         | 10.98155578                                                                  | 14.72357282 |             |        |
| ENSG00000170775                     | 31.23796524                                                                  | 43.56670362 | 81.15726854 |        |
| 18.082408                           | 18.27719755                                                                  | 5.887293117 | 51.98731247 |        |
| 14.08229955                         | 1.884810316                                                                  | 0.006979198 | 0.047202846 | GPR37  |
| 7                                   | 124745997                                                                    | 124765627   | - 3021      |        |
| protein_coding                      | G protein-coupled receptor 37 [Source:HGNC Symbol;Acc:HGNC:4494]             |             |             |        |
|                                     | -                                                                            | 27 47       | 83 18       | 20     |
| 6                                   | 0.488773613                                                                  | 0.685932042 | 1.272711074 |        |
| 0.288086559                         | 0.288494719                                                                  | 0.092714265 |             |        |
| ENSG00000128524                     | 596.9922247                                                                  | 1197.620874 | 921.086108  |        |
| 1247.686152                         | 1583.719168                                                                  | 1280.486253 | 905.2330689 |        |
| 1370.630524                         | -0.597450431                                                                 | 0.006981464 | 0.047202846 |        |
| ATP6V1F 7                           | 128862826                                                                    | 128865844   | + 789       |        |
| protein_coding                      | ATPase H+ transporting V1 subunit F [Source:HGNC Symbol;Acc:HGNC:16832]      |             |             |        |
|                                     | -                                                                            | 516 1292    | 942 1242    | 1733   |
| 1305                                | 35.76575615                                                                  | 72.19705265 | 55.3065229  |        |
| 76.11071628                         | 95.71503385                                                                  | 77.21106525 |             |        |
| ENSG00000185043                     | 905.9009921                                                                  | 1218.94075  | 1026.688337 |        |
| 1179.374833                         | 1504.213358                                                                  | 1792.680754 | 1050.510026 |        |
| 1492.089648                         | -0.505726401                                                                 | 0.007010745 | 0.047379864 | CIB1   |
| 15                                  | 90229975                                                                     | 90234047    | - 1472      |        |
| protein_coding                      | calcium and integrin binding 1 [Source:HGNC Symbol;Acc:HGNC:16920]           |             |             |        |
|                                     | -                                                                            | 783 1315    | 1050 1174   | 1646   |
| 1827                                | 29.09033113                                                                  | 39.3869091  | 33.04334044 |        |
| 38.56217342                         | 48.72822801                                                                  | 57.93977084 |             |        |
| ENSG00000101955                     | 1903.201957                                                                  | 1902.103741 | 1572.299853 |        |
| 1151.246642                         | 1473.142122                                                                  | 1372.720512 | 1792.535184 |        |
| 1332.369759                         | 0.427685312                                                                  | 0.007019865 | 0.047420535 | SRPX   |
| X                                   | 38149336                                                                     | 38220924    | - 1987      |        |
| protein_coding                      | sushi repeat containing protein X-linked [Source:HGNC Symbol;Acc:HGNC:11309] |             |             |        |
|                                     | -                                                                            | 1645 2052   | 1608 1146   | 1612   |
| 1399                                | 45.27544712                                                                  | 45.53165613 | 37.4878586  |        |
| 27.88611198                         | 35.35295888                                                                  | 32.86744033 |             |        |
| ENSG00000160752                     | 1412.650206                                                                  | 2011.483976 | 1992.753172 |        |
| 1169.32905                          | 1085.665534                                                                  | 1556.207814 | 1805.629118 |        |
| 1270.4008                           | 0.507801827                                                                  | 0.007046235 | 0.047577649 | FDPS   |

|                        |                                                      |                                               |                        |             |                |                |
|------------------------|------------------------------------------------------|-----------------------------------------------|------------------------|-------------|----------------|----------------|
| 1                      | 155308748                                            | 155320666                                     | +                      | 3718        |                |                |
| protein_coding         | farnesyl diphosphate synthase                        | [Source:HGNC                                  |                        |             |                |                |
| Symbol;Acc:HGNC:3631]  | -                                                    | 1221 2170                                     | 2038                   | 1164        | 1188           |                |
| 1586                   | 17.95977912                                          | 25.73263776                                   | 25.39201992            |             |                |                |
| 15.13717429            | 13.92405253                                          | 19.91314396                                   |                        |             |                |                |
| ENSG00000101972        | 5856.540002                                          | 4979.581529                                   | 5486.426913            |             |                |                |
| 4371.924422            | 4599.456763                                          | 3697.220077                                   | 5440.849481            |             |                |                |
| 4222.867088            | 0.365444379                                          | 0.007058821                                   | 0.047641587            |             | STAG2          |                |
| X                      | 123960212                                            | 124422664                                     | +                      | 8187        |                |                |
| protein_coding         | stromal antigen 2                                    | [Source:HGNC                                  | Symbol;Acc:HGNC:11355] |             |                |                |
| -                      | 5062 5372                                            | 5611 4352                                     | 5033                   | 3768        |                |                |
| 33.81365079            | 28.9297827                                           | 31.74811422                                   | 25.70190493            |             |                |                |
| 26.78926126            | 21.48484078                                          |                                               |                        |             |                |                |
| ENSG00000159055        | 532.2023708                                          | 598.810437                                    | 618.9463974            |             |                |                |
| 348.588643             | 340.8697343                                          | 486.6828977                                   | 583.3197351            |             |                |                |
| 392.0470917            | 0.573923676                                          | 0.007064871                                   | 0.047661375            |             | MIS18A         |                |
| 21                     | 32268219                                             | 32279069                                      | -                      | 1723        |                |                |
| protein_coding         | MIS18 kinetochore protein A                          | [Source:HGNC                                  |                        |             |                |                |
| Symbol;Acc:HGNC:1286]  | -                                                    | 460 646                                       | 633                    | 347         | 373            |                |
| 496                    | 14.60048448                                          | 16.53031763                                   | 17.01848469            |             |                |                |
| 9.737453883            | 9.433701975                                          | 13.43824129                                   |                        |             |                |                |
| ENSG00000228300        | 1020.440198                                          | 1391.353662                                   | 1178.247091            |             |                |                |
| 1574.174074            | 1495.074759                                          | 1830.948159                                   | 1196.680317            |             |                |                |
| 1633.398998            | -0.448075171                                         | 0.007072615                                   | 0.047692574            |             |                |                |
| C19orf24               | 19                                                   | 1275438                                       | 1279249                | +           | 2193           | protein_coding |
|                        | chromosome 19 open reading frame 24                  | [Source:HGNC                                  |                        |             |                |                |
| Symbol;Acc:HGNC:26073] | -                                                    | 882 1501                                      | 1205                   | 1567        | 1636           |                |
| 1866                   | 21.99503545                                          | 30.17699692                                   | 25.45369706            |             |                |                |
| 34.54868973            | 32.50897417                                          | 39.72089665                                   |                        |             |                |                |
| ENSG00000088833        | 1192.827488                                          | 1635.141812                                   | 1397.273937            |             |                |                |
| 2098.563906            | 1754.610965                                          | 1858.422194                                   | 1408.414412            |             |                |                |
| 1903.865688            | -0.434112868                                         | 0.007123752                                   | 0.048016224            |             | NSFL1C         |                |
| 20                     | 1442162                                              | 1473842                                       | -                      | 6531        | protein_coding | NSFL1          |
| cofactor               | [Source:HGNC                                         | Symbol;Acc:HGNC:15912]                        | -                      | 1031        | 1764           |                |
| 1429                   | 2089                                                 | 1920 1894                                     | 8.633237615            | 11.90838467 |                |                |
| 10.13572925            | 15.46535782                                          | 12.81091479                                   | 13.53774492            |             |                |                |
| ENSG00000235865        | 53.22023708                                          | 17.61207168                                   | 45.95652556            |             |                |                |
| 10.04578222            | 0                                                    | 9.812155195                                   | 38.92961144            | 6.619312472 |                |                |
| 2.562356546            | 0.007126933                                          | 0.048016491                                   | GSN-AS1                | 9           |                |                |
| 121280768              | 121285530                                            | -                                             | 4763                   | antisense   |                |                |
| GSN antisense RNA 1    | [Source:HGNC                                         | Symbol;Acc:HGNC:23372]                        | -                      |             |                |                |
| 46                     | 19                                                   | 47 10                                         | 0                      | 10          | 0.528167851    |                |
| 0.175876161            | 0.457108958                                          | 0.10151276                                    | 0                      |             |                |                |
| 0.098008886            |                                                      |                                               |                        |             |                |                |
| ENSG00000153147        | 3352.874936                                          | 2967.170602                                   | 2944.151031            |             |                |                |
| 2469.25327             | 2524.994841                                          | 2246.002324                                   | 3088.065523            |             |                |                |
| 2413.416812            | 0.355370152                                          | 0.007130333                                   | 0.048018236            |             |                |                |
| SMARCA5                | 4                                                    | 143513463                                     | 143557486              | +           | 8385           |                |
| protein_coding         | "SWI/SNF related, matrix associated, actin dependent | regulator of chromatin, subfamily a, member 5 | [Source:HGNC           |             |                |                |



|                        |                                                   |             |                          |              |             |        |
|------------------------|---------------------------------------------------|-------------|--------------------------|--------------|-------------|--------|
| Symbol;Acc:HGNC:11101] | " -                                               | 2898        | 3201                     | 3011         | 2458        | 2763   |
| 2289                   | 18.90122826                                       | 16.83125753 | 16.63451505              |              |             |        |
| 14.1735953             | 14.35940404                                       | 12.74350112 |                          |              |             |        |
| ENSG00000253471        | 0 0                                               | 0           | 5.02289111               | 9.138598774  |             |        |
|                        | 12.75580175                                       | 0           | 8.972430546              | -5.585609877 |             |        |
| 0.007143462            | 1                                                 | AC012574.1  | 8                        | 23707141     |             |        |
| 23789487               | +                                                 | 252         | lincRNA novel transcript |              |             | -      |
| 0                      | 0                                                 | 0           | 5                        | 10           | 13          | 0      |
| 0                      | 0.959335863                                       | 1.729251085 | 2.408179457              |              |             |        |
| ENSG00000175745        | 2556.885303                                       | 1821.458992 | 3300.069655              |              |             |        |
| 2019.202226            | 1390.894733                                       | 1834.873021 | 2559.471317              |              |             |        |
| 1748.323327            | 0.549941277                                       | 0.007161339 | 0.048205811              |              |             | NR2F1  |
| 5                      | 93583224                                          | 93594615    | +                        | 4314         |             |        |
| protein_coding         | nuclear receptor subfamily 2 group F member 1     |             |                          |              |             |        |
| [Source:HGNC           | Symbol;Acc:HGNC:7975]                             | RXR-like    | 2210                     | 1965         |             |        |
| 3375                   | 2010                                              | 1522        | 1870                     | 28.01604625  | 20.08243509 |        |
| 36.24065949            | 22.52771448                                       | 15.37422064 | 20.23520002              |              |             |        |
| ENSG00000197756        | 11186.66244                                       | 13119.1395  | 13309.79204              |              |             |        |
| 13525.64118            | 16342.55619                                       | 20127.67395 | 12538.53133              |              |             |        |
| 16665.29044            | -0.410434116                                      | 0.007168988 | 0.048217827              |              |             | RPL37A |
| 2                      | 216498189                                         | 216579180   | +                        | 6841         |             |        |
| protein_coding         | ribosomal protein L37a [Source:HGNC               |             |                          |              |             |        |
| Symbol;Acc:HGNC:10348] | -                                                 | 9669        | 14153                    | 13612        | 13464       | 17883  |
| 20513                  | 77.29593991                                       | 91.21428837 | 92.17322983              |              |             |        |
| 95.1602839             | 113.9145985                                       | 139.9766596 |                          |              |             |        |
| ENSG00000144868        | 152.7189412                                       | 160.3625474 | 209.2488611              |              |             |        |
| 271.2361199            | 256.7946256                                       | 332.6320611 | 174.1101165              |              |             |        |
| 286.8876022            | -0.719366962                                      | 0.007169433 | 0.048217827              |              |             |        |
| TMEM108                | 3                                                 | 133038391   | 133397792                | +            | 8425        |        |
| protein_coding         | transmembrane protein 108 [Source:HGNC            |             |                          |              |             |        |
| Symbol;Acc:HGNC:28451] | -                                                 | 132         | 173                      | 214          | 270         | 281    |
| 339                    | 0.856838031                                       | 0.905336753 | 1.176647346              |              |             |        |
| 1.549512454            | 1.453432972                                       | 1.878346995 |                          |              |             |        |
| ENSG00000108592        | 5360.203444                                       | 5521.847946 | 5497.182696              |              |             |        |
| 7175.70224             | 6079.909764                                       | 7482.749551 | 5459.744695              |              |             |        |
| 6912.787185            | -0.340350562                                      | 0.007192785 | 0.048353605              |              |             | FTSJ3  |
| 17                     | 63819433                                          | 63830012    | -                        | 5212         |             |        |
| protein_coding         | FtsJ RNA methyltransferase homolog 3 [Source:HGNC |             |                          |              |             |        |
| Symbol;Acc:HGNC:17136] | -                                                 | 4633        | 5957                     | 5622         | 7143        | 6653   |
| 7626                   | 48.61302047                                       | 50.39148432 | 49.96764599              |              |             |        |
| 66.2639712             | 55.62521648                                       | 68.30278777 |                          |              |             |        |
| ENSG00000137825        | 173.5442514                                       | 241.0072966 | 261.0721771              |              |             |        |
| 377.7214115            | 335.386575                                        | 358.1436646 | 225.2079084              |              |             |        |
| 357.0838837            | -0.662723208                                      | 0.007201377 | 0.048390091              |              |             | ITPKA  |
| 15                     | 41493393                                          | 41503551    | +                        | 2092         |             |        |
| protein_coding         | inositol-trisphosphate 3-kinase A [Source:HGNC    |             |                          |              |             |        |
| Symbol;Acc:HGNC:6178]  | -                                                 | 150         | 260                      | 267          | 376         | 367    |
| 365                    | 3.921247832                                       | 5.479559231 | 5.912239749              |              |             |        |
| 8.690152169            | 7.644744617                                       | 8.144739906 |                          |              |             |        |
| ENSG00000159063        | 1623.217231                                       | 1406.184881 | 1712.125027              |              |             |        |

|                                                                            |                                                                                        |             |               |             |
|----------------------------------------------------------------------------|----------------------------------------------------------------------------------------|-------------|---------------|-------------|
| 1034.715569                                                                | 1121.30607                                                                             | 1347.208908 | 1580.509046   |             |
| 1167.743516                                                                | 0.436498163                                                                            | 0.007215301 | 0.048462347   | ALG8        |
| 11                                                                         | 78100936                                                                               | 78139660    | - 3448        |             |
| protein_coding                                                             | "ALG8, alpha-1,3-glucosyltransferase [Source:HGNC Symbol;Acc:HGNC:23161]" -            |             |               |             |
| 1373                                                                       | 22.25282367                                                                            | 19.39779126 | 1751 1030     | 1227        |
| 14.44345804                                                                | 15.50728981                                                                            | 18.58871273 | 23.52455109   |             |
| ENSG00000259146                                                            | 26.61011854                                                                            | 17.61207168 | 9.777984162   | 0           |
| 1.827719755                                                                | 2.943646558                                                                            | 18.00005813 | 1.590455438   |             |
| 3.49138423                                                                 | 0.007255194                                                                            | 1           | AC005476.2    | 14          |
| 71292729                                                                   | 71321814                                                                               | -           | 973 antisense |             |
| "novel transcript, antisense to SIPA1L1"                                   |                                                                                        |             | -             | 23          |
| 19                                                                         | 10                                                                                     | 0           | 2             | 3           |
| 0.860943633                                                                | 0.47609061                                                                             | 0           | 0.089572718   | 0.143931036 |
| ENSG00000117318                                                            | 2677.209318                                                                            | 3295.311306 | 3581.675598   |             |
| 2258.291843                                                                | 2371.466382                                                                            | 2618.864221 | 3184.732074   |             |
| 2416.207482                                                                | 0.398712277                                                                            | 0.007256373 | 0.048716811   | ID3         |
| 1                                                                          | 23557918                                                                               | 23559794    | - 1797        |             |
| protein_coding                                                             | "inhibitor of DNA binding 3, HLH protein [Source:HGNC Symbol;Acc:HGNC:5362]" bHLH      |             |               |             |
| 2669                                                                       | 70.42226517                                                                            | 87.22188856 | 94.42593576   | 2595        |
| 60.4852453                                                                 | 62.92857289                                                                            | 69.33404412 |               |             |
| ENSG00000231672                                                            | 189.7417148                                                                            | 237.2994921 | 72.3570828    |             |
| 220.0026306                                                                | 549.2297863                                                                            | 281.6088541 | 166.4660966   |             |
| 350.2804237                                                                | -1.073926557                                                                           | 0.007286695 | 0.048878745   | DIRC3       |
| 2                                                                          | 217284019                                                                              | 217756593   | - 4665        |             |
| lincRNA disrupted in renal carcinoma 3 [Source:HGNC Symbol;Acc:HGNC:17805] | -                                                                                      | 164 256     | 74 219        | 601         |
| 287                                                                        | 1.922591034                                                                            | 2.41948133  | 0.734822638   |             |
| 2.269831837                                                                | 5.614116514                                                                            | 2.871946097 |               |             |
| ENSG00000174233                                                            | 733.5137024                                                                            | 812.9361505 | 1084.378444   |             |
| 635.8980145                                                                | 574.8178629                                                                            | 627.9779325 | 876.9427655   |             |
| 612.8979366                                                                | 0.517507402                                                                            | 0.007286888 | 0.048878745   | ADCY6       |
| 12                                                                         | 48766194                                                                               | 48789037    | - 8410        |             |
| protein_coding                                                             | adenylate cyclase 6 [Source:HGNC Symbol;Acc:HGNC:237]                                  |             |               |             |
| -                                                                          | 634 877                                                                                | 1109 633    | 629 640       |             |
| 4.122759251                                                                | 4.597667451                                                                            | 6.108548215 | 3.639225197   |             |
| 3.259216778                                                                | 3.552466687                                                                            |             |               |             |
| ENSG00000140718                                                            | 2145.006947                                                                            | 1903.030692 | 2043.59869    |             |
| 1766.048514                                                                | 1458.520364                                                                            | 1384.495098 | 2030.545443   |             |
| 1536.354659                                                                | 0.402293898                                                                            | 0.007306075 | 0.048967432   | FT0         |
| 16                                                                         | 53701692                                                                               | 54158512    | + 21379       |             |
| protein_coding                                                             | "FT0, alpha-ketoglutarate dependent dioxygenase [Source:HGNC Symbol;Acc:HGNC:24678]" - |             |               |             |
| 1758                                                                       | 1596 1411                                                                              | 4.742606097 | 1854 2053     | 2090        |
| 4.528572809                                                                | 3.975874799                                                                            | 3.253150066 | 4.233850513   |             |
| ENSG00000080493                                                            | 68.26073887                                                                            | 54.69011731 | 84.09066379   |             |
| 29.13276844                                                                | 22.84649694                                                                            | 27.47403455 | 69.01383999   |             |
| 26.48443331                                                                | 1.382448204                                                                            | 0.007306516 | 0.048967432   | SLC4A4      |
| 4                                                                          | 71062667                                                                               | 71572087    | + 9622        |             |

|                                                  |                                                      |             |             |             |             |
|--------------------------------------------------|------------------------------------------------------|-------------|-------------|-------------|-------------|
| protein_coding                                   | solute carrier family 4 member 4 [Source:HGNC        |             |             |             |             |
| Symbol;Acc:HGNC:11030]                           | -                                                    | 59          | 59          | 86          | 29          |
| 28                                               | 0.335336921                                          | 0.270346416 | 0.414033569 |             |             |
| 0.145724932                                      | 0.113222634                                          | 0.135843454 |             |             |             |
| ENSG00000143756                                  | 2864.637109                                          | 2570.435514 | 2198.09084  |             |             |
| 3418.57969                                       | 3935.080632                                          | 2881.829981 | 2544.387821 |             |             |
| 3411.830101                                      | -0.423538782                                         | 0.007317689 | 0.049020823 |             | FBX028      |
| 1                                                | 224114087                                            | 224162047   | +           | 6044        |             |
| protein_coding                                   | F-box protein 28 [Source:HGNC Symbol;Acc:HGNC:29046] |             |             |             |             |
| -                                                | 2476                                                 | 2773        | 2248        | 3403        | 4306        |
| 22.40375927                                      | 20.22829935                                          | 17.22956477 | 27.22317092 |             |             |
| 31.04617975                                      | 22.68430755                                          |             |             |             |             |
| ENSG00000116761                                  | 173.5442514                                          | 330.9215573 | 172.0925212 |             |             |
| 463.1105604                                      | 378.3379893                                          | 327.7259835 | 225.5194433 |             |             |
| 389.7248444                                      | -0.786884089                                         | 0.007343448 | 0.049153016 |             | CTH         |
| 1                                                | 70411218                                             | 70439851    | +           | 2414        |             |
| protein_coding                                   | cystathionine gamma-lyase [Source:HGNC               |             |             |             |             |
| Symbol;Acc:HGNC:2501]                            | -                                                    | 150         | 357         | 176         | 461         |
| 334                                              | 3.398198204                                          | 6.520259917 | 3.377363907 |             |             |
| 9.233468589                                      | 7.473459289                                          | 6.458850569 |             |             |             |
| ENSG00000113593                                  | 821.4427898                                          | 772.1503003 | 746.0601915 |             |             |
| 476.1700772                                      | 653.4098124                                          | 521.0254408 | 779.8844272 |             |             |
| 550.2017768                                      | 0.502513101                                          | 0.007344006 | 0.049153016 |             | PPWD1       |
| 5                                                | 65563236                                             | 65587549    | +           | 3777        |             |
| protein_coding                                   | peptidylprolyl isomerase domain and WD repeat        |             |             |             |             |
| containing 1 [Source:HGNC Symbol;Acc:HGNC:28954] | -                                                    |             |             |             |             |
| 833                                              | 763                                                  | 474         | 715         | 531         | 10.28030682 |
| 9.723709476                                      | 9.35793467                                           | 6.067818383 | 8.249310579 |             |             |
| 6.562866531                                      |                                                      |             |             |             |             |
| ENSG00000130244                                  | 193.2125998                                          | 341.1180198 | 139.8251735 |             |             |
| 405.8496017                                      | 318.0232373                                          | 485.7016821 | 224.7185977 |             |             |
| 403.1915071                                      | -0.84157328                                          | 0.007347069 | 0.049153016 |             | FAM98C      |
| 19                                               | 38403135                                             | 38409088    | +           | 4598        |             |
| protein_coding                                   | family with sequence similarity 98 member C          |             |             |             |             |
| [Source:HGNC Symbol;Acc:HGNC:27119]              | -                                                    |             |             |             |             |
| 404                                              | 348                                                  | 495         | 1.986287991 | 3.528684337 | 143         |
| 1.440686632                                      | 4.248284712                                          | 3.29813839  | 5.025534605 |             |             |
| ENSG00000138798                                  | 49.74935206                                          | 26.88158308 | 57.69010655 |             |             |
| 7.032047554                                      | 16.44947779                                          | 12.75580175 | 44.77368056 |             |             |
| 12.07910903                                      | 1.88528818                                           | 0.007352412 | 0.049167243 |             | EGF         |
| 4                                                | 109912884                                            | 110012266   | +           | 6127        |             |
| protein_coding                                   | epidermal growth factor [Source:HGNC                 |             |             |             |             |
| Symbol;Acc:HGNC:3229]                            | -                                                    | 43          | 29          | 59          | 7           |
| 13                                               | 0.383809118                                          | 0.20868156  | 0.446073668 |             | 18          |
| 0.055239708                                      | 0.128021592                                          | 0.099047041 |             |             |             |
| ENSG00000120327                                  | 121.480976                                           | 110.3071858 | 59.64570339 |             |             |
| 205.9385355                                      | 205.6184724                                          | 152.0884055 | 97.1446217  |             |             |
| 187.8818045                                      | -0.953715583                                         | 0.007357704 | 0.049181119 |             |             |
| PCDHB14                                          | 5                                                    | 141222932   | 141227759   | +           | 4828        |
| protein_coding                                   | protocadherin beta 14 [Source:HGNC                   |             |             |             |             |

|                                 |                                           |                        |             |      |                |             |
|---------------------------------|-------------------------------------------|------------------------|-------------|------|----------------|-------------|
| Symbol;Acc:HGNC:8685]           | -                                         | 105                    | 119         | 61   | 205            | 225         |
| 155                             | 1.189369371                               | 1.086709986            | 0.585281813 |      |                |             |
| 2.052994643                     | 2.030831329                               | 1.498685387            |             |      |                |             |
| ENSG00000100387                 | 1066.718665                               | 835.1829779            | 804.7280965 |      |                |             |
| 630.8751234                     | 691.7919272                               | 611.2972686            | 902.2099131 |      |                |             |
| 644.6547731                     | 0.483934311                               | 0.007374994            | 0.049275148 |      |                | RBX1        |
| 22                              | 40951347                                  | 40973309               | +           | 3092 |                |             |
| protein_coding                  | ring-box 1 [Source:HGNC                   | Symbol;Acc:HGNC:9928]  | -           |      |                |             |
| 922                             | 901                                       | 823                    | 628         | 757  | 623            | 16.30745349 |
| 12.84751885                     | 12.32999231                               | 9.820223566            | 10.66878571 |      |                |             |
| 9.405775253                     |                                           |                        |             |      |                |             |
| ENSG00000070404                 | 216.3518334                               | 342.044971             | 225.8714341 |      |                |             |
| 337.5382826                     | 474.2932764                               | 457.2464321            | 261.4227462 |      |                |             |
| 423.025997                      | -0.692928558                              | 0.007382975            | 0.049289167 |      |                | FSTL3       |
| 19                              | 676365                                    | 683399                 | +           | 3067 | protein_coding |             |
| follistatin like 3 [Source:HGNC | Symbol;Acc:HGNC:3973]                     | -                      | 187         |      |                |             |
| 369                             | 231                                       | 336                    | 519         | 466  | 3.334437207    |             |
| 5.304525581                     | 3.488997512                               | 5.296960299            | 7.374153602 |      |                |             |
| 7.092807555                     |                                           |                        |             |      |                |             |
| ENSG00000130770                 | 642.11373                                 | 892.6539486            | 936.7308827 |      |                |             |
| 386.7626155                     | 540.0911876                               | 681.944786             | 823.8328538 |      |                |             |
| 536.2661964                     | 0.619906096                               | 0.007383541            | 0.049289167 |      |                |             |
| ATP5IF1 1                       | 28236109                                  | 28246906               | +           | 2225 |                |             |
| protein_coding                  | ATP synthase inhibitory factor            | subunit 1 [Source:HGNC |             |      |                |             |
| Symbol;Acc:HGNC:871]            | -                                         | 555                    | 963         | 958  | 385            | 591         |
| 695                             | 13.64136032                               | 19.08227849            | 19.94517952 |      |                |             |
| 8.366271049                     | 11.57486843                               | 14.58145376            |             |      |                |             |
| ENSG00000101974                 | 1948.323462                               | 1695.393637            | 1802.082481 |      |                |             |
| 1132.159656                     | 1523.404416                               | 1402.156977            | 1815.266527 |      |                |             |
| 1352.573683                     | 0.423989887                               | 0.007392526            | 0.049321817 |      |                | ATP11C      |
| X                               | 139726346                                 | 139945276              | -           | 7407 |                |             |
| protein_coding                  | ATPase phospholipid transporting          | 11C [Source:HGNC       |             |      |                |             |
| Symbol;Acc:HGNC:13554]          | -                                         | 1684                   | 1829        | 1843 | 1127           | 1667        |
| 1429                            | 12.43353025                               | 10.8869272             | 11.5261813  |      |                |             |
| 7.356695624                     | 9.80735403                                | 9.006082479            |             |      |                |             |
| ENSG00000164024                 | 2657.540969                               | 2231.171396            | 2205.913227 |      |                |             |
| 1986.051145                     | 1665.966557                               | 1755.394564            | 2364.875197 |      |                |             |
| 1802.470755                     | 0.391585975                               | 0.007396488            | 0.049321817 |      |                | METAP1      |
| 4                               | 98995620                                  | 99062813               | +           | 4117 |                |             |
| protein_coding                  | methionyl aminopeptidase 1 [Source:HGNC   |                        |             |      |                |             |
| Symbol;Acc:HGNC:15789]          | -                                         | 2297                   | 2407        | 2256 | 1977           | 1823        |
| 1789                            | 30.51229264                               | 25.77681064            | 25.38403653 |      |                |             |
| 23.21811825                     | 19.29587155                               | 20.28502323            |             |      |                |             |
| ENSG00000178927                 | 1361.743892                               | 1554.497063            | 1471.586616 |      |                |             |
| 1721.847073                     | 2071.720342                               | 1951.637668            | 1462.609191 |      |                |             |
| 1915.068361                     | -0.388648718                              | 0.007398111            | 0.049321817 |      |                | CYBC1       |
| 17                              | 82442589                                  | 82450829               | -           | 7234 |                |             |
| protein_coding                  | cytochrome b-245 chaperone 1 [Source:HGNC |                        |             |      |                |             |
| Symbol;Acc:HGNC:28672]          | -                                         | 1177                   | 1677        | 1505 | 1714           | 2267        |
| 1989                            | 8.898005527                               | 10.22088534            | 9.637412573 |      |                |             |

|                 |                                                                                                             |             |             |             |             |             |
|-----------------|-------------------------------------------------------------------------------------------------------------|-------------|-------------|-------------|-------------|-------------|
| 11.45601384     | 13.65625487                                                                                                 | 12.83519037 |             |             |             |             |
| ENSG00000103496 | 720.787124                                                                                                  | 915.8277272 | 743.1267963 |             |             |             |
| 1030.697256     | 946.758833                                                                                                  | 1467.898417 | 793.2472158 |             |             |             |
| 1148.451502     | -0.533198671                                                                                                | 0.007406869 | 0.049358676 | STX4        |             |             |
| 16              | 31032889                                                                                                    | 31042975    | + 4078      |             |             |             |
| protein_coding  | syntaxin 4 [Source:HGNC Symbol;Acc:HGNC:11439]                                                              |             |             |             | -           |             |
| 623             | 988                                                                                                         | 760         | 1026        | 1036        | 1496        | 8.354789994 |
|                 | 10.68178128                                                                                                 | 8.633140853 | 12.16469868 | 11.0705993  |             |             |
|                 | 17.12499321                                                                                                 |             |             |             |             |             |
| ENSG00000151023 | 65.94681552                                                                                                 | 113.0880392 | 17.60037149 |             |             |             |
| 167.7645631     | 202.8768928                                                                                                 | 129.5204486 | 65.5450754  |             |             |             |
| 166.7206348     | -1.345690341                                                                                                | 0.007410171 | 0.049359166 | ENKUR       |             |             |
| 10              | 24981979                                                                                                    | 25062279    | - 4076      |             |             |             |
| protein_coding  | "enkurin, TRPC channel interacting protein [Source:HGNC Symbol;Acc:HGNC:28388]"                             |             |             |             | -           |             |
| 167             | 222                                                                                                         | 132         | 0.764778012 | 1.319652587 |             | 18          |
| 0.204569454     | 1.980995606                                                                                                 | 2.373435297 | 1.51177024  |             |             |             |
| ENSG00000258565 | 15.04050178                                                                                                 | 0           | 17.60037149 | 0           | 0           |             |
| 0               | 10.88029109                                                                                                 | 0           | 5.934502442 | 0.007414869 |             |             |
| 1               | BLZF2P                                                                                                      | 14          | 68867857    | 68869951    |             | -           |
| 1130            | unprocessed_pseudogene basic leucine zipper nuclear factor 2 pseudogene [Source:HGNC Symbol;Acc:HGNC:20049] |             |             |             | -           | 13          |
| 0               | 18                                                                                                          | 0           | 0           | 0           | 0.629157853 | 0           |
|                 | 0.737898313                                                                                                 | 0           | 0           | 0           |             |             |
| ENSG00000159593 | 2795.219409                                                                                                 | 2349.821142 | 2015.242536 |             |             |             |
| 1820.295738     | 1734.506047                                                                                                 | 1833.891806 | 2386.761029 |             |             |             |
| 1796.231197     | 0.409746566                                                                                                 | 0.007419033 | 0.049396674 | NAE1        |             |             |
| 16              | 66802875                                                                                                    | 66873256    | - 4810      |             |             |             |
| protein_coding  | NEDD8 activating enzyme E1 subunit 1 [Source:HGNC Symbol;Acc:HGNC:621]                                      |             |             |             | -           |             |
| 1869            | 27.4692351                                                                                                  | 23.23629306 | 19.84885098 |             |             |             |
| 18.21437751     | 17.1952989                                                                                                  | 18.13887136 |             |             |             |             |
| ENSG00000120899 | 69.41770054                                                                                                 | 113.0880392 | 53.77891289 |             |             |             |
| 177.8103453     | 134.337402                                                                                                  | 165.8254228 | 78.76155087 |             |             |             |
| 159.32439       | -1.013518705                                                                                                | 0.007435219 | 0.049482886 | PTK2B       |             |             |
| 8               | 27311482                                                                                                    | 27459391    | + 7933      |             |             |             |
| protein_coding  | protein tyrosine kinase 2 beta [Source:HGNC Symbol;Acc:HGNC:9612]                                           |             |             |             | -           |             |
| 169             | 0.413626646                                                                                                 | 0.678041591 | 0.321164616 |             |             | 147         |
| 1.078790289     | 0.807492465                                                                                                 | 0.994478243 |             |             |             |             |
| ENSG00000173597 | 3.470885027                                                                                                 | 4.634755704 | 0.977798416 |             |             |             |
| 17.07782977     | 47.52071363                                                                                                 | 7.849724156 | 3.027813049 |             |             |             |
| 24.14942252     | -2.997127724                                                                                                | 0.007463995 | 0.049652782 |             |             |             |
| SULT1B1         | 4                                                                                                           | 69721162    | 69787961    | - 7356      |             |             |
| protein_coding  | sulfotransferase family 1B member 1 [Source:HGNC Symbol;Acc:HGNC:17845]                                     |             |             |             | -           |             |
| 8               | 0.022303563                                                                                                 | 0.029968309 | 0.006297392 |             |             | 52          |
| 0.111739936     | 0.308049296                                                                                                 | 0.050768497 |             |             |             |             |
| ENSG00000146535 | 4924.028892                                                                                                 | 4512.398154 | 6049.638801 |             |             |             |
| 4110.734085     | 3870.196581                                                                                                 | 3960.185837 | 5162.021949 |             |             |             |

|                                                             |                                                    |                |                                |                |
|-------------------------------------------------------------|----------------------------------------------------|----------------|--------------------------------|----------------|
| 3980.372167                                                 | 0.375067319                                        | 0.007473838    | 0.049696637                    | GNA12          |
| 7                                                           | 2728112                                            | 2844324        | -                              | 6120           |
| protein subunit alpha 12 [Source:HGNC Symbol;Acc:HGNC:4380] |                                                    |                | protein_coding                 | G              |
| 4256                                                        | 4868                                               | 6187           | 4092                           | 4235           |
| 35.06978516                                                 | 46.83075394                                        | 32.32848995    | 38.03162743                    | 30.15508731    |
| 30.78546879                                                 |                                                    |                |                                |                |
| ENSG00000189212                                             | 357.5011578                                        | 303.1130231    | 244.449604                     |                |
| 231.0529911                                                 | 150.7868798                                        | 153.069621     | 301.6879283                    |                |
| 178.303164                                                  | 0.75859955                                         | 0.007478664    | 0.0497071                      |                |
| DPY19L2P1                                                   | 7                                                  | 35079989       | 35186041                       | -              |
| transcribed_unprocessed_pseudogene                          |                                                    |                | DPY19L2 pseudogene 1           | 8272           |
| [Source:HGNC Symbol;Acc:HGNC:22305]                         |                                                    |                | 309                            | 327            |
| 230                                                         | 165                                                | 156            | 2.042879105                    | 1.742894843    |
| 1.400012582                                                 | 1.344369115                                        | 0.869224615    | 0.880359608                    |                |
| ENSG00000186907                                             | 236.0201818                                        | 569.1480005    | 446.8538762                    |                |
| 729.3237892                                                 | 710.0691248                                        | 616.2033462    | 417.3406862                    |                |
| 685.1987534                                                 | -0.713175289                                       | 0.007483922    | 0.049720432                    |                |
| RTN4RL2 11                                                  | 57460549                                           | 57477534       | +                              | 2387           |
| protein_coding                                              | reticulon 4 receptor like 2 [Source:HGNC           |                |                                |                |
| Symbol;Acc:HGNC:23053]                                      | -                                                  | 204            | 614                            | 457            |
| 628                                                         | 4.67382515                                         | 11.34096239    | 8.868828092                    | 777            |
| 14.70569039                                                 | 14.18493002                                        | 12.28155226    |                                |                |
| ENSG00000174015                                             | 0                                                  | 15.75816939    | 0.977798416                    | 26.11903377    |
| 77.67808958                                                 | 19.62431039                                        | 5.578655937    | 41.14047791                    |                |
| -2.858382505                                                | 0.007490394                                        | 0.049741816    | SPERT                          | 13             |
| 45702311                                                    | 45714559                                           | +              | 2125                           | protein_coding |
| spermatid associated [Source:HGNC Symbol;Acc:HGNC:30720]    |                                                    |                |                                |                |
| -                                                           | 0                                                  | 17             | 1                              | 26             |
| 0.352715013                                                 | 0.021799349                                        | 0.591582925    | 85                             | 20             |
| 0.439356542                                                 |                                                    |                | 0                              | 0              |
| ENSG00000114107                                             | 447.7441685                                        | 326.2868016    | 484.010216                     |                |
| 168.7691413                                                 | 297.0044602                                        | 291.4210093    | 419.347062                     |                |
| 252.3982036                                                 | 0.731252017                                        | 0.007493923    | 0.049743641                    | CEP70          |
| 3                                                           | 138494344                                          | 138594538      | -                              | 4420           |
| protein_coding                                              | centrosomal protein 70 [Source:HGNC                |                |                                |                |
| Symbol;Acc:HGNC:29972]                                      | -                                                  | 387            | 352                            | 495            |
| 297                                                         | 4.788322669                                        | 3.511190171    | 5.187825809                    | 168            |
| 1.837757606                                                 | 3.204200541                                        | 3.136752233    |                                | 325            |
| ENSG00000147465                                             | 18.51138681                                        | 4.634755704    | 3.911193665                    | 0              |
| 0                                                           | 0                                                  | 9.01911206     | 0                              | 5.660909064    |
| 0.007497782                                                 | 1                                                  | STAR           | 8                              | 38143649       |
| -                                                           | 3767                                               | protein_coding | steroidogenic acute regulatory | 38151265       |
| protein [Source:HGNC Symbol;Acc:HGNC:11359]                 |                                                    |                |                                |                |
| 4                                                           | 0                                                  | 0              | 0                              | 0.232283882    |
| 0.049188868                                                 | 0                                                  | 0              | 0                              | 0.058520542    |
| ENSG00000141568                                             | 1716.931127                                        | 2018.899585    | 2273.381318                    |                |
| 3025.789605                                                 | 2547.841338                                        | 2437.33935     | 2003.070676                    |                |
| 2670.323431                                                 | -0.414378554                                       | 0.00749924     | 0.049757328                    | FOXK2          |
| 17                                                          | 82519713                                           | 82644662       | +                              | 9991           |
| protein_coding                                              | forkhead box K2 [Source:HGNC Symbol;Acc:HGNC:6036] |                |                                |                |

|                           |                                                 |      |             |       |             |       |        |
|---------------------------|-------------------------------------------------|------|-------------|-------|-------------|-------|--------|
| Fork                      | 1484                                            | 2178 | 2325        | 3012  | 2788        | 2484  |        |
| 8.12305988                | 9.611316404                                     |      | 10.77994274 |       | 14.57629755 |       |        |
| 12.16024733               | 11.60616307                                     |      |             |       |             |       |        |
| ENSG00000080189           | 2000.386737                                     |      | 2707.624282 |       | 2622.455352 |       |        |
| 3608.444974               | 2989.235659                                     |      | 3163.438835 |       | 2443.488791 |       |        |
| 3253.706489               | -0.412639345                                    |      | 0.007507038 |       | 0.049787461 |       |        |
| SLC35C2 20                | 46345980                                        |      | 46364458    |       | -           | 7708  |        |
| protein_coding            | solute carrier family 35 member C2 [Source:HGNC |      |             |       |             |       |        |
| Symbol;Acc:HGNC:17117]    | -                                               |      | 1729        | 2921  | 2682        | 3592  | 3271   |
| 3224                      | 12.26727214                                     |      | 16.7079747  |       | 16.11831071 |       |        |
| 22.53179745               | 18.49257701                                     |      | 19.52537407 |       |             |       |        |
| ENSG00000130956           | 284.6125722                                     |      | 324.4328993 |       | 385.252576  |       |        |
| 507.3120021               | 483.4318752                                     |      | 477.851958  |       | 331.4326825 |       |        |
| 489.5319451               | -0.561559138                                    |      | 0.007513    |       | 0.049805388 |       | HABP4  |
| 9                         | 96450201                                        |      | 96491336    |       | +           | 4056  |        |
| protein_coding            | hyaluronan binding protein 4 [Source:HGNC       |      |             |       |             |       |        |
| Symbol;Acc:HGNC:17062]    | -                                               |      | 246         | 350   | 394         | 505   | 529    |
| 487                       | 3.316896145                                     |      | 3.804556657 |       | 4.499877916 |       |        |
| 6.019974454               | 5.683506008                                     |      | 5.605018505 |       |             |       |        |
| ENSG00000099194           | 14149.64129                                     |      | 12981.02378 |       | 16446.56936 |       |        |
| 10455.65013               | 10788.11585                                     |      | 12658.66142 |       | 14525.74481 |       |        |
| 11300.80913               | 0.362188205                                     |      | 0.00752267  |       | 0.049847882 |       | SCD    |
| 10                        | 100347124                                       |      | 100364834   |       | +           | 5362  |        |
| protein_coding            | stearoyl-CoA desaturase [Source:HGNC            |      |             |       |             |       |        |
| Symbol;Acc:HGNC:10571]    | -                                               |      | 12230       | 14004 | 16820       | 10408 | 11805  |
| 12901                     | 124.7367315                                     |      | 115.148756  |       | 145.3120527 |       |        |
| 93.85160204               | 95.93957262                                     |      | 112.3162517 |       |             |       |        |
| ENSG00000125148           | 18389.90584                                     |      | 15346.60309 |       | 14225.98916 |       |        |
| 17879.4832                | 25228.92964                                     |      | 20415.1701  |       | 15987.49936 |       |        |
| 21174.52764               | -0.405460742                                    |      | 0.007535086 |       | 0.049908515 |       | MT2A   |
| 16                        | 56608199                                        |      | 56609497    |       | +           | 1299  |        |
| protein_coding            | metallothionein 2A [Source:HGNC                 |      |             |       |             |       |        |
| Symbol;Acc:HGNC:7406]     | -                                               |      | 15895       | 16556 | 14549       | 17798 | 27607  |
| 669.1848403               | 561.92742                                       |      | 518.8316349 |       | 662.4655029 |       |        |
| 926.122983                | 747.6967259                                     |      |             |       |             |       |        |
| ENSG00000143093           | 1504.050178                                     |      | 1615.675838 |       | 1598.70041  |       |        |
| 2111.623423               | 1877.982048                                     |      | 2084.101763 |       | 1572.808809 |       |        |
| 2024.569078               | -0.363957586                                    |      | 0.007540678 |       | 0.049911791 |       | STRIP1 |
| 1                         | 110031577                                       |      | 110074641   |       | +           | 7352  |        |
| protein_coding            | striatin interacting protein 1 [Source:HGNC     |      |             |       |             |       |        |
| Symbol;Acc:HGNC:25916]    | -                                               |      | 1300        | 1743  | 1635        | 2102  | 2055   |
| 2124                      | 9.670135658                                     |      | 10.45263648 |       | 10.30183796 |       |        |
| 13.82383145               | 12.18049466                                     |      | 13.48636936 |       |             |       |        |
| ENSG00000268942           | 52.06327541                                     |      | 41.71280134 |       | 18.57816991 |       |        |
| 5.02289111                | 9.138598774                                     |      | 11.77458623 |       | 37.45141555 |       |        |
| 8.645358706               | 2.111484308                                     |      | 0.007543479 |       | 0.049911791 |       |        |
| CKS1BP3 5                 | 62512246                                        |      | 62512482    |       | -           | 237   |        |
| processed_pseudogene      | CDC28 protein kinase regulatory subunit 1B      |      |             |       |             |       |        |
| pseudogene 3 [Source:HGNC | Symbol;Acc:HGNC:24233]                          |      |             |       |             |       | 45     |
| 45                        | 19                                              | 5    | 10          | 12    | 10.38386135 |       |        |

|                                     |                                                     |                        |               |       |  |
|-------------------------------------|-----------------------------------------------------|------------------------|---------------|-------|--|
| 8.371400616                         | 3.713707637                                         | 1.020053323            | 1.838697357   |       |  |
| 2.363626965                         |                                                     |                        |               |       |  |
| ENSG00000105185                     | 1458.928673                                         | 1691.685832            | 1503.853964   |       |  |
| 925.2165425                         | 1238.280134                                         | 1253.012218            | 1551.48949    |       |  |
| 1138.836298                         | 0.446115406                                         | 0.007546552            | 0.049911791   | PDCD5 |  |
| 19                                  | 32581068                                            | 32587452               | + 2253        |       |  |
| protein_coding                      | programmed cell death 5 [Source:HGNC                |                        |               |       |  |
| Symbol;Acc:HGNC:8764]               | -                                                   | 1261 1825              | 1538 921      | 1355  |  |
| 1277                                | 30.60896238                                         | 35.71376487            | 31.62260182   |       |  |
| 19.76512908                         | 26.20817025                                         | 26.45914104            |               |       |  |
| ENSG00000052795                     | 805.2453263                                         | 747.1226195            | 701.0814644   |       |  |
| 902.1112434                         | 1157.860465                                         | 1024.389002            | 751.1498034   |       |  |
| 1028.120237                         | -0.453495283                                        | 0.00754864             | 0.049911791   | FNIP2 |  |
| 4                                   | 158769138                                           | 158908049              | + 10868       |       |  |
| protein_coding                      | folliculin interacting protein 2 [Source:HGNC       |                        |               |       |  |
| Symbol;Acc:HGNC:29280]              | -                                                   | 696 806                | 717 898       | 1267  |  |
| 1044                                | 3.502307891                                         | 3.269786301            | 3.056131109   |       |  |
| 3.995102474                         | 5.08025583                                          | 4.484323186            |               |       |  |
| ENSG00000241560                     | 21.98227184                                         | 0 10.75578258          | 0 0           |       |  |
| 0                                   | 10.91268481                                         | 0 5.936891929          | 0.007549192   |       |  |
| 1                                   | ZBTB20-AS1                                          | 3 114351811            | 114388978     |       |  |
| +                                   | 2035 antisense                                      | ZBTB20 antisense RNA 1 |               |       |  |
| [Source:HGNC Symbol;Acc:HGNC:40640] | -                                                   | 19 0                   | 11            |       |  |
| 0                                   | 0 0                                                 | 0.510603633            | 0 0.250397926 |       |  |
| 0                                   | 0 0                                                 |                        |               |       |  |
| ENSG00000166848                     | 2313.923351                                         | 2976.440113            | 2254.803148   |       |  |
| 3069.991047                         | 3685.596886                                         | 3242.917292            | 2515.055537   |       |  |
| 3332.835075                         | -0.405967135                                        | 0.007552685            | 0.049916946   |       |  |
| TERF2IP 16                          | 75647786                                            | 75761872               | + 3379        |       |  |
| protein_coding                      | TERF2 interacting protein [Source:HGNC              |                        |               |       |  |
| Symbol;Acc:HGNC:19246]              | -                                                   | 2000 3211              | 2306 3056     | 4033  |  |
| 3305                                | 32.36953917                                         | 41.8973034             | 31.61357183   |       |  |
| 43.72868068                         | 52.01141007                                         | 45.65930618            |               |       |  |
| ENSG00000171094                     | 11.56961676                                         | 65.813531              | 13.68917783   |       |  |
| 74.33878843                         | 105.0938859                                         | 107.9337071            | 30.35744186   |       |  |
| 95.78879382                         | -1.64871734                                         | 0.007574206            | 0.050037552   | ALK   |  |
| 2                                   | 29192774                                            | 29921566               | - 7362        |       |  |
| protein_coding                      | ALK receptor tyrosine kinase [Source:HGNC           |                        |               |       |  |
| Symbol;Acc:HGNC:427]                | -                                                   | 10 71                  | 14 74         | 115   |  |
| 110                                 | 0.074284619                                         | 0.42520317             | 0.088091637   |       |  |
| 0.486000956                         | 0.68070764                                          | 0.697497906            |               |       |  |
| ENSG00000005175                     | 1323.564157                                         | 1182.789656            | 1134.246163   |       |  |
| 953.3447327                         | 954.069712                                          | 791.8409242            | 1213.533325   |       |  |
| 899.7517896                         | 0.431167857                                         | 0.007591565            | 0.050115693   | RPAP3 |  |
| 12                                  | 47661249                                            | 47706061               | - 5381        |       |  |
| protein_coding                      | RNA polymerase II associated protein 3 [Source:HGNC |                        |               |       |  |
| Symbol;Acc:HGNC:26151]              | -                                                   | 1144 1276              | 1160 949      | 1044  |  |
| 807                                 | 11.62673423                                         | 10.4549423             | 9.986135462   |       |  |
| 8.527160489                         | 8.454659163                                         | 7.000943593            |               |       |  |
| ENSG00000105518                     | 274.1999171                                         | 325.3598504            | 246.4052009   |       |  |



|                        |                                                  |                      |             |        |
|------------------------|--------------------------------------------------|----------------------|-------------|--------|
| 388.7717719            | 413.9785245                                      | 479.814389           | 281.9883228 |        |
| 427.5215618            | -0.599771081                                     | 0.007594072          | 0.050115693 |        |
| TMEM205 19             | 11342776                                         | 11346518             | - 1606      |        |
| protein_coding         | transmembrane protein 205 [Source:HGNC           |                      |             |        |
| Symbol;Acc:HGNC:29631] | -                                                | 237 351              | 252 387     | 453    |
| 489                    | 8.070445663                                      | 9.635972092          | 7.2687119   |        |
| 11.65109224            | 12.29168038                                      | 14.2137723           |             |        |
| ENSG00000161547        | 6376.015795                                      | 5762.855243          | 5374.957894 |        |
| 4456.308993            | 4767.60698                                       | 4695.116261          | 5837.942977 |        |
| 4639.677411            | 0.331282133                                      | 0.00759669           | 0.050115693 | SRSF2  |
| 17                     | 76734115                                         | 76737374             | - 3017      |        |
| protein_coding         | serine and arginine rich splicing factor 2       |                      |             |        |
| [Source:HGNC           | Symbol;Acc:HGNC:10783]                           | -                    | 5511 6217   | 5497   |
| 4436                   | 5217 4785                                        | 99.89639446          | 90.85305078 |        |
| 84.40202813            | 71.0914617                                       | 75.35362062          | 74.0376572  |        |
| ENSG00000119640        | 114.5392059                                      | 136.2618177          | 143.7363672 |        |
| 42.19228532            | 68.53949081                                      | 80.4596726           | 131.5124636 |        |
| 63.73048291            | 1.045137786                                      | 0.007599148          | 0.050115693 | ACYP1  |
| 14                     | 75053221                                         | 75069483             | - 1841      |        |
| protein_coding         | acylphosphatase 1 [Source:HGNC                   | Symbol;Acc:HGNC:179] |             |        |
| -                      | 99 147                                           | 147 42               | 75 82       |        |
| 2.940871975            | 3.520444518                                      | 3.698843888          | 1.103053859 |        |
| 1.77527678             | 2.079247077                                      |                      |             |        |
| ENSG00000066651        | 629.3871516                                      | 659.9892123          | 548.5449115 |        |
| 473.1563426            | 388.3904479                                      | 424.8663199          | 612.6404251 |        |
| 428.8043701            | 0.515056757                                      | 0.007608325          | 0.050154576 | TRMT11 |
| 6                      | 125986430                                        | 126203817            | + 5771      |        |
| protein_coding         | tRNA methyltransferase 11 homolog [Source:HGNC   |                      |             |        |
| Symbol;Acc:HGNC:21080] | -                                                | 544 712              | 561 471     | 425    |
| 433                    | 5.155164619                                      | 5.4395488            | 4.503127491 |        |
| 3.946126919            | 3.209197561                                      | 3.502538017          |             |        |
| ENSG00000183010        | 864.2503718                                      | 1312.562815          | 1121.534783 |        |
| 1511.890224            | 1381.756135                                      | 1714.183513          | 1099.449324 |        |
| 1535.94329             | -0.481367378                                     | 0.007619876          | 0.050189335 | PYCR1  |
| 17                     | 81932384                                         | 81942412             | - 2886      |        |
| protein_coding         | pyrroline-5-carboxylate reductase 1 [Source:HGNC |                      |             |        |
| Symbol;Acc:HGNC:9721]  | -                                                | 747 1416             | 1147 1505   | 1512   |
| 1747                   | 14.15529706                                      | 21.63220971          | 18.41066802 |        |
| 25.21397917            | 22.83042847                                      | 28.25807764          |             |        |
| ENSG00000161526        | 1624.374193                                      | 1901.17679           | 1825.549643 |        |
| 2187.971368            | 2401.623758                                      | 2302.912824          | 1783.700209 |        |
| 2297.50265             | -0.36487453                                      | 0.007620164          | 0.050189335 |        |
| SAP30BP 17             | 75667116                                         | 75708062             | + 8268      |        |
| protein_coding         | SAP30 binding protein [Source:HGNC               |                      |             |        |
| Symbol;Acc:HGNC:30785] | -                                                | 1404 2051            | 1867 2178   | 2628   |
| 2347                   | 9.286698639                                      | 10.93702363          | 10.46035216 |        |
| 12.73674999            | 13.85107531                                      | 13.25130523          |             |        |
| ENSG00000162614        | 327.4201542                                      | 230.8108341          | 220.9824421 |        |
| 139.6363729            | 94.12756737                                      | 193.2994573          | 259.7378101 |        |
| 142.3544659            | 0.867252099                                      | 0.007624296          | 0.050194923 | NEXN   |

|                        |                                           |              |                          |             |             |
|------------------------|-------------------------------------------|--------------|--------------------------|-------------|-------------|
| 1                      | 77888513                                  | 77943895     | +                        | 4436        |             |
| protein_coding         | nexilin F-actin binding protein           | [Source:HGNC |                          |             |             |
| Symbol;Acc:HGNC:29557] | -                                         | 283 249      | 226                      | 139         | 103         |
| 197                    | 3.488908749                               | 2.474809461  | 2.360039965              |             |             |
| 1.515041326            | 1.011822389                               | 2.073102257  |                          |             |             |
| ENSG00000171056        | 70.57466222                               | 79.71779811  | 111.4690194              |             |             |
| 55.25180221            | 23.76035681                               | 18.64309487  | 87.25382659              |             |             |
| 32.5517513             | 1.425685389                               | 0.007645685  | 0.050314069              |             | SOX7        |
| 8                      | 10723768                                  | 10730512     | -                        | 3216        |             |
| protein_coding         | SRY-box 7                                 | [Source:HGNC |                          |             |             |
| Symbol;Acc:HGNC:18196] |                                           |              |                          |             | HMG         |
| 61                     | 86                                        | 114          | 55                       | 26          | 19          |
| 1.179006961            | 1.642068489                               | 0.82689024   | 0.352302647              |             |             |
| 0.275793227            |                                           |              |                          |             |             |
| ENSG00000257219        | 57.84808379                               | 44.49365476  | 10.75578258              |             |             |
| 82.37541421            | 105.0938859                               | 122.6519399  | 37.69917371              |             |             |
| 103.3737467            | -1.460262714                              | 0.007655796  | 0.050358933              |             |             |
| LINC02407              | 12                                        | 76259839     | 76305131                 | +           | 1201        |
| lincRNA                | long intergenic non-protein coding RNA    | 2407         |                          |             |             |
| [Source:HGNC           |                                           |              |                          |             |             |
| Symbol;Acc:HGNC:53336] | -                                         | 50           | 48                       |             | 11          |
| 82                     | 115                                       | 125          | 2.276783365              | 1.762106641 |             |
| 0.424279583            | 3.301201711                               | 4.172664151  | 4.858621207              |             |             |
| ENSG00000152642        | 1187.042679                               | 975.1526002  | 1174.335898              |             |             |
| 885.0334136            | 823.3877496                               | 746.7050103  | 1112.177059              |             |             |
| 818.3753912            | 0.442192957                               | 0.007661065  | 0.050371913              |             | GPD1L       |
| 3                      | 32105689                                  | 32168713     | +                        | 4802        |             |
| protein_coding         | glycerol-3-phosphate dehydrogenase 1 like | [Source:HGNC |                          |             |             |
| Symbol;Acc:HGNC:28956] | -                                         | 1026 1052    | 1201                     | 881         | 901         |
| 761                    | 11.68476326                               | 9.65889716   | 11.58572745              |             |             |
| 8.8706403              | 8.176383121                               | 7.397901369  |                          |             |             |
| ENSG00000065548        | 2436.561289                               | 2525.014908  | 2083.688425              |             |             |
| 1811.254534            | 1899.000825                               | 1726.939314  | 2348.421541              |             |             |
| 1812.398225            | 0.373689231                               | 0.007673906  | 0.050434655              |             | ZC3H15      |
| 2                      | 186486156                                 | 186509363    | +                        | 3125        |             |
| protein_coding         | zinc finger CCCH-type containing 15       | [Source:HGNC |                          |             |             |
| Symbol;Acc:HGNC:29528] | -                                         | 2106 2724    | 2131                     | 1803        | 2078        |
| 1760                   | 36.85556369                               | 38.43182778  | 31.58900044              |             |             |
| 27.89632034            | 28.97704661                               | 26.29109546  |                          |             |             |
| ENSG00000255458        | 19.66834849                               | 2.780853423  | 4.888992081              |             | 0           |
| 0                      | 0                                         | 9.11273133   | 0                        | 5.675255406 |             |
| 0.007683737            | 1                                         | AC108471.2   | 4                        | 39639140    |             |
| 39666644               | +                                         | 2301         | lincRNA novel transcript |             | -           |
| 17                     | 3                                         | 5            | 0                        | 0           | 0.404042468 |
| 0.05748289             | 0.100659749                               | 0            | 0                        | 0           |             |
| ENSG00000105339        | 151.5619795                               | 150.1660848  | 251.294193               |             |             |
| 72.32963199            | 97.78300688                               | 116.7646468  | 184.3407524              |             |             |
| 95.6257619             | 0.947167588                               | 0.007689903  | 0.050476849              |             | DENND3      |
| 8                      | 141117278                                 | 141195808    | +                        | 14670       |             |
| protein_coding         | DENN domain containing 3                  | [Source:HGNC |                          |             |             |
| Symbol;Acc:HGNC:29134] | -                                         | 131 162      | 257                      | 72          | 107         |
| 119                    | 0.488355288                               | 0.486876551  | 0.811531656              |             |             |

|                        |                                               |             |                          |                    |                |             |
|------------------------|-----------------------------------------------|-------------|--------------------------|--------------------|----------------|-------------|
| 0.237303202            | 0.317842715                                   | 0.37867173  |                          |                    |                |             |
| ENSG00000148225        | 78.67339395                                   | 85.27950496 | 107.5578258              |                    |                |             |
| 164.7508284            | 143.4760008                                   | 194.2806729 | 90.50357489              |                    |                |             |
| 167.5025007            | -0.886493343                                  | 0.007690963 | 0.050476849              | WDR31              |                |             |
| 9                      | 113313222                                     | 113340298   | -                        | 4933               |                |             |
| protein_coding         | WD repeat domain 31 [Source:HGNC              |             |                          |                    |                |             |
| Symbol;Acc:HGNC:21421] | -                                             | 68          | 92                       | 110                | 164            | 157         |
| 198                    | 0.753863142                                   | 0.822262851 | 1.032961239              |                    |                |             |
| 1.607436957            | 1.386906344                                   | 1.873700232 |                          |                    |                |             |
| ENSG00000198938        | 31749.3423                                    | 41972.34766 | 52026.69813              |                    |                |             |
| 54188.95845            | 50394.80294                                   | 68184.66645 | 41916.12936              |                    |                |             |
| 57589.47595            | -0.458273719                                  | 0.007693218 | 0.050476849              | MT-C03             |                |             |
| MT                     | 9207                                          | 9990        | +                        | 784                | protein_coding |             |
| mitochondrially        | encoded cytochrome c oxidase III [Source:HGNC |             |                          |                    |                |             |
| Symbol;Acc:HGNC:7422]  | -                                             | 27442       | 45280                    | 53208              | 53942          | 55145       |
| 69490                  | 1914.231286                                   | 2546.386443 | 3143.86094               |                    |                |             |
| 3326.688972            | 3065.128428                                   | 4137.636028 |                          |                    |                |             |
| ENSG00000130396        | 1513.305872                                   | 1319.978425 | 1456.91964               |                    |                |             |
| 1052.797977            | 1058.249738                                   | 1154.890666 | 1430.067979              |                    |                |             |
| 1088.646127            | 0.393271072                                   | 0.007693534 | 0.050476849              | AFDN               |                |             |
| 6                      | 167826922                                     | 167972023   | +                        | 13720              |                |             |
| protein_coding         | "afadin, adherens junction formation factor   |             |                          |                    |                |             |
| [Source:HGNC           | Symbol;Acc:HGNC:7137]"                        | -           | 1308                     | 1424               | 1490           |             |
| 1048                   | 1158                                          | 1177        | 5.213727701              | 4.576040251        |                |             |
| 5.030771742            | 3.693247289                                   | 3.678011186 | 4.004685242              |                    |                |             |
| ENSG00000263680        | 11.56961676                                   | 8.342560268 | 5.866790497              | 0                  |                |             |
| 0                      | 0                                             | 8.592989174 | 0                        | 5.594481407        |                |             |
| 0.00770414             | 1                                             | AC007639.1  | 17                       | 72425939           |                |             |
| 72428852               | +                                             | 833         | lincRNA novel transcript |                    |                | -           |
| 10                     | 9                                             | 6           | 0                        | 0                  | 0              | 0.656522646 |
| 0.476355809            | 0.333663503                                   | 0           | 0                        | 0                  | 0              |             |
| ENSG00000260536        | 13.88354011                                   | 11.12341369 | 1.955596832              | 0                  |                |             |
| 0                      | 0                                             | 8.987516877 | 0                        | 5.658860764        |                |             |
| 0.007795914            | 1                                             | AL035071.2  | 20                       | 32843128           |                |             |
| 32854257               | -                                             | 459         | antisense                | "novel transcript, |                |             |
| antisense to MAPRE1"   | -                                             | 12          | 12                       | 2                  | 0              | 0           |
| 0                      | 1.42976043                                    | 1.15266344  | 0.201845823              | 0                  |                |             |
| 0                      | 0                                             |             |                          |                    |                |             |
| ENSG00000111817        | 966.0629992                                   | 852.7950496 | 1041.355313              |                    |                |             |
| 699.1864425            | 691.7919272                                   | 719.2309758 | 953.404454               |                    |                |             |
| 703.4031152            | 0.438568512                                   | 0.007804199 | 0.051180949              | DSE                |                |             |
| 6                      | 116254173                                     | 116444860   | +                        | 19193              |                |             |
| protein_coding         | dermatan sulfate epimerase [Source:HGNC       |             |                          |                    |                |             |
| Symbol;Acc:HGNC:21144] | -                                             | 835         | 920                      | 1065               | 696            | 757         |
| 733                    | 2.379240396                                   | 2.113386467 | 2.570450236              |                    |                |             |
| 1.753345862            | 1.718745658                                   | 1.782818562 |                          |                    |                |             |
| ENSG00000135912        | 651.3694234                                   | 768.4424958 | 632.6355753              |                    |                |             |
| 1008.596535            | 872.7361829                                   | 929.2110969 | 684.1491648              |                    |                |             |
| 936.8479383            | -0.4528511                                    | 0.007825168 | 0.051296457              | TTL4               |                |             |
| 2                      | 218710845                                     | 218755416   | +                        | 7685               |                |             |

|                                                              |                                                     |             |             |            |      |                |  |
|--------------------------------------------------------------|-----------------------------------------------------|-------------|-------------|------------|------|----------------|--|
| protein_coding                                               | tubulin tyrosine ligase like 4 [Source:HGNC         |             |             |            |      |                |  |
| Symbol;Acc:HGNC:28976]                                       | -                                                   | 563         | 829         | 647        | 1004 | 955            |  |
| 947                                                          | 4.006445467                                         | 4.756030343 | 3.899984353 |            |      |                |  |
| 6.316711724                                                  | 5.415244844                                         | 5.752440602 |             |            |      |                |  |
| ENSG00000243156                                              | 461.6277086                                         | 661.8431146 | 738.2378042 |            |      |                |  |
| 1154.260377                                                  | 685.3949081                                         | 1005.745907 | 620.5695425 |            |      |                |  |
| 948.4670642                                                  | -0.61069314                                         | 0.007830641 | 0.051296823 |            |      | MICAL3         |  |
| 22                                                           | 17787649                                            | 18024559    | -           | 22354      |      |                |  |
| protein_coding                                               | "microtubule associated monooxygenase, calponin and |             |             |            |      |                |  |
| LIM domain containing 3 [Source:HGNC Symbol;Acc:HGNC:24694]" | -                                                   |             |             |            |      |                |  |
| 399                                                          | 714                                                 | 755         | 1149        | 750        | 1025 | 0.976140567    |  |
| 1.408240802                                                  | 1.564566982                                         | 2.48522663  | 1.462058044 |            |      |                |  |
| 2.140497153                                                  |                                                     |             |             |            |      |                |  |
| ENSG00000273033                                              | 349.4024261                                         | 247.4959546 | 258.1387819 |            |      |                |  |
| 546.4905528                                                  | 374.6825497                                         | 417.9978113 | 285.0123875 |            |      |                |  |
| 446.3903046                                                  | -0.648690783                                        | 0.007832499 | 0.051296823 |            |      |                |  |
| LINC02035                                                    | 3                                                   | 122886941   | 122892416   | +          |      | 5476           |  |
| lincRNA long intergenic non-protein coding RNA 2035          |                                                     |             |             |            |      |                |  |
| [Source:HGNC Symbol;Acc:HGNC:52875]                          | -                                                   | 302         | 267         |            |      | 264            |  |
| 544                                                          | 410                                                 | 426         | 3.016047773 | 2.14971942 |      |                |  |
| 2.2332788                                                    | 4.803266427                                         | 3.262714064 | 3.6315514   |            |      |                |  |
| ENSG00000151320                                              | 64.78985384                                         | 75.08304241 | 50.84551764 |            |      |                |  |
| 132.6043253                                                  | 170.8917971                                         | 93.21547435 | 63.57280463 |            |      |                |  |
| 132.2371989                                                  | -1.056916921                                        | 0.007839189 | 0.051296823 |            |      | AKAP6          |  |
| 14                                                           | 32329273                                            | 32837681    | +           | 19748      |      |                |  |
| protein_coding                                               | A-kinase anchoring protein 6 [Source:HGNC           |             |             |            |      |                |  |
| Symbol;Acc:HGNC:376]                                         | -                                                   | 56          | 81          | 52         | 132  | 187            |  |
| 95                                                           | 0.155081367                                         | 0.180840566 | 0.121978329 |            |      |                |  |
| 0.32318562                                                   | 0.412645474                                         | 0.224567303 |             |            |      |                |  |
| ENSG00000259431                                              | 34.70885027                                         | 69.52133556 | 38.13413823 |            |      |                |  |
| 164.7508284                                                  | 72.19493032                                         | 104.9900606 | 47.45477469 |            |      |                |  |
| 113.9786064                                                  | -1.258883594                                        | 0.007845926 | 0.051296823 |            |      | THTPA          |  |
| 14                                                           | 23555988                                            | 23560271    | +           | 2894       |      |                |  |
| protein_coding                                               | thiamine triphosphatase [Source:HGNC                |             |             |            |      |                |  |
| Symbol;Acc:HGNC:18987]                                       | -                                                   | 30          | 75          | 39         | 164  | 79             |  |
| 107                                                          | 0.566914338                                         | 1.142606511 | 0.624264353 |            |      |                |  |
| 2.739974606                                                  | 1.189562219                                         | 1.725962226 |             |            |      |                |  |
| ENSG00000171148                                              | 2687.621973                                         | 3172.026804 | 3131.888327 |            |      |                |  |
| 3533.101607                                                  | 3980.773626                                         | 3975.885285 | 2997.179035 |            |      |                |  |
| 3829.920173                                                  | -0.353484337                                        | 0.007846654 | 0.051296823 |            |      | TADA3          |  |
| 3                                                            | 9779860                                             | 9793011     | -           | 4234       |      | protein_coding |  |
| transcriptional                                              | adaptor 3 [Source:HGNC Symbol;Acc:HGNC:19422]       |             |             |            |      |                |  |
| 2323                                                         | 3422                                                | 3203        | 3517        | 4356       | 4052 | 30.00496116    |  |
| 35.6338797                                                   | 35.04358598                                         | 40.16268427 | 44.83277439 |            |      |                |  |
| 44.67500593                                                  |                                                     |             |             |            |      |                |  |
| ENSG00000134686                                              | 5610.107166                                         | 7308.082794 | 6676.407586 |            |      |                |  |
| 7753.334718                                                  | 8698.118313                                         | 8681.794916 | 6531.532515 |            |      |                |  |
| 8377.749316                                                  | -0.35898511                                         | 0.007851744 | 0.051296823 |            |      | PHC2           |  |
| 1                                                            | 33323623                                            | 33431052    | -           | 4975       |      |                |  |
| protein_coding                                               | polyhomeotic homolog 2 [Source:HGNC                 |             |             |            |      |                |  |

|                                    |                                                   |             |             |             |      |        |
|------------------------------------|---------------------------------------------------|-------------|-------------|-------------|------|--------|
| Symbol;Acc:HGNC:3183]              | -                                                 | 4849        | 7884        | 6828        | 7718 | 9518   |
| 8848                               | 53.303265                                         | 69.86947637 |             | 63.57741752 |      |        |
| 75.00891883                        | 83.37027099                                       | 83.02293163 |             |             |      |        |
| ENSG00000105705                    | 625.9162666                                       | 929.7319943 |             | 803.7502981 |      |        |
| 1345.130239                        | 875.4777626                                       | 1232.406692 |             | 786.4661863 |      |        |
| 1151.004898                        | -0.548256777                                      | 0.007851843 |             | 0.051296823 |      | SUGP1  |
| 19                                 | 19276018                                          | 19320844    |             | -           | 5356 |        |
| protein_coding                     | SURP and G-patch domain containing 1 [Source:HGNC |             |             |             |      |        |
| Symbol;Acc:HGNC:18643]             | -                                                 | 541         | 1003        | 822         | 1339 | 958    |
| 1256                               | 5.523971249                                       | 8.256468392 |             | 7.109412362 |      |        |
| 12.08763187                        | 7.794415236                                       | 10.94699972 |             |             |      |        |
| ENSG00000106105                    | 7836.10143                                        | 7379.458032 |             | 6374.267875 |      |        |
| 9332.531683                        | 9535.213961                                       | 8462.983855 |             | 7196.609112 |      |        |
| 9110.243166                        | -0.340266444                                      | 0.007852068 |             | 0.051296823 |      | GARS   |
| 7                                  | 30594681                                          | 30634033    |             | +           | 4152 |        |
| protein_coding                     | glycyl-tRNA synthetase [Source:HGNC               |             |             |             |      |        |
| Symbol;Acc:HGNC:4162]              | -                                                 | 6773        | 7961        | 6519        | 9290 | 10434  |
| 8625                               | 89.21100738                                       | 84.53649493 |             | 72.73209411 |      |        |
| 108.1831408                        | 109.5095729                                       | 96.97232196 |             |             |      |        |
| ENSG00000117122                    | 579.6377995                                       | 699.8481113 |             | 862.4182031 |      |        |
| 377.7214115                        | 509.0199517                                       | 546.5370443 |             | 713.968038  |      |        |
| 477.7594692                        | 0.579949108                                       | 0.007855643 |             | 0.051298254 |      | MFAP2  |
| 1                                  | 16974502                                          | 16980835    |             | -           | 2915 |        |
| protein_coding                     | microfibril associated protein 2 [Source:HGNC     |             |             |             |      |        |
| Symbol;Acc:HGNC:7033]              | -                                                 | 501         | 755         | 882         | 376  | 557    |
| 557                                | 9.399264683                                       | 11.41937541 |             | 14.01627087 |      |        |
| 6.236637508                        | 8.326744403                                       | 8.919955174 |             |             |      |        |
| ENSG00000159714                    | 500.9644056                                       | 957.5405285 |             | 754.8603773 |      |        |
| 1112.068092                        | 1156.032745                                       | 1025.370218 |             | 737.7884371 |      |        |
| 1097.823685                        | -0.572007552                                      | 0.007871512 |             | 0.051379935 |      | ZDHHC1 |
| 16                                 | 67394152                                          | 67416833    |             | -           | 3540 |        |
| protein_coding                     | zinc finger DHHC-type containing 1 [Source:HGNC   |             |             |             |      |        |
| Symbol;Acc:HGNC:17916]             | -                                                 | 433         | 1033        | 772         | 1107 | 1265   |
| 1045                               | 6.689279569                                       | 12.86562882 |             | 10.10221237 |      |        |
| 15.1197836                         | 15.57205257                                       | 13.78031244 |             |             |      |        |
| ENSG00000100297                    | 3397.996442                                       | 4032.237463 |             | 4494.939319 |      |        |
| 3051.908639                        | 2785.444906                                       | 3294.921714 |             | 3975.057741 |      |        |
| 3044.091753                        | 0.385237752                                       | 0.007874899 |             | 0.051380104 |      | MCM5   |
| 22                                 | 35400063                                          | 35425430    |             | +           | 7338 |        |
| protein_coding                     | minichromosome maintenance complex component 5    |             |             |             |      |        |
| [Source:HGNC Symbol;Acc:HGNC:6948] | -                                                 |             |             | 2937        | 4350 | 4597   |
| 3038                               | 3048                                              | 3358        | 21.88874954 | 26.13638432 |      |        |
| 29.02012322                        | 20.01756644                                       | 18.10072011 |             | 21.3623497  |      |        |
| ENSG0000010361                     | 547.2428726                                       | 680.3821374 |             | 640.4579626 |      |        |
| 843.8457065                        | 806.0244119                                       | 929.2110969 |             | 622.6943242 |      |        |
| 859.6937384                        | -0.464289377                                      | 0.007885609 |             | 0.051414177 |      | FUZ    |
| 19                                 | 49806869                                          | 49817376    |             | -           | 2950 |        |
| protein_coding                     | fuzzy planar cell polarity protein [Source:HGNC   |             |             |             |      |        |
| Symbol;Acc:HGNC:26219]             | -                                                 | 473         | 734         | 655         | 840  | 882    |
| 947                                | 8.768672248                                       | 10.97003471 |             | 10.28541311 |      |        |

|                        |                                                      |             |             |             |                |             |     |     |
|------------------------|------------------------------------------------------|-------------|-------------|-------------|----------------|-------------|-----|-----|
| 13.76760783            | 13.02882248                                          | 14.98559526 |             |             |                |             |     |     |
| ENSG00000134250        | 10071.35139                                          | 9027.577161 | 11318.01667 |             |                |             |     |     |
| 13913.40838            | 11837.22699                                          | 12939.28906 | 10138.98174 |             |                |             |     |     |
| 12896.64147            | -0.347077258                                         | 0.007886848 | 0.051414177 | NOTCH2      |                |             |     |     |
| 1                      | 119911553                                            | 120069626   | -           | 16807       |                |             |     |     |
| protein_coding         | notch 2 [Source:HGNC Symbol;Acc:HGNC:7882]           |             |             |             | -              |             |     |     |
| 8705                   | 9739                                                 | 11575       | 13850       | 12953       | 13187          | 28.32521977 |     |     |
| 25.54807155            | 31.9031272                                           | 39.84380352 | 33.58449043 |             |                |             |     |     |
| 36.62704162            |                                                      |             |             |             |                |             |     |     |
| ENSG00000180573        | 238.3341052                                          | 282.720098  | 199.4708769 |             |                |             |     |     |
| 453.0647781            | 323.5063966                                          | 363.0497422 | 240.1750267 |             |                |             |     |     |
| 379.873639             | -0.660551456                                         | 0.007894092 | 0.051439467 |             |                |             |     |     |
| HIST1H2AC              | 6                                                    | 26124145    | 26139116    | +           |                | 1668        |     |     |
|                        | protein_coding histone cluster 1 H2A family member c |             |             |             |                |             |     |     |
|                        | [Source:HGNC Symbol;Acc:HGNC:4733]                   |             |             |             | -              | 206         | 305 | 204 |
| 451                    | 354                                                  | 370         | 6.754075123 | 8.061906389 |                |             |     |     |
| 5.665478254            | 13.07319418                                          | 9.248383143 | 10.3550384  |             |                |             |     |     |
| ENSG00000116171        | 1797.918444                                          | 1651.826933 | 1517.543142 |             |                |             |     |     |
| 1325.038675            | 1326.010682                                          | 1086.20558  | 1655.76284  |             |                |             |     |     |
| 1245.751646            | 0.410152955                                          | 0.007905686 | 0.051493063 | SCP2        |                |             |     |     |
| 1                      | 52927229                                             | 53051703    | +           | 8305        |                |             |     |     |
| protein_coding         | sterol carrier protein 2 [Source:HGNC                |             |             |             |                |             |     |     |
| Symbol;Acc:HGNC:10606] | -                                                    | 1554        | 1782        | 1552        | 1319           | 1451        |     |     |
| 1107                   | 10.23307343                                          | 9.460237094 | 8.656743229 |             |                |             |     |     |
| 7.679030194            | 7.613535435                                          | 6.222344038 |             |             |                |             |     |     |
| ENSG00000108523        | 1136.136366                                          | 1811.262529 | 1479.409004 |             |                |             |     |     |
| 2042.307525            | 1796.648519                                          | 2379.447635 | 1475.602633 |             |                |             |     |     |
| 2072.801226            | -0.489497515                                         | 0.007918411 | 0.051553085 | RNF167      |                |             |     |     |
| 17                     | 4940008                                              | 4945222     | +           | 2744        | protein_coding | ring        |     |     |
| finger protein 167     | [Source:HGNC Symbol;Acc:HGNC:24544]                  |             |             |             | -              | 982         |     |     |
| 1954                   | 1513                                                 | 2033        | 1966        | 2425        | 19.57140903    |             |     |     |
| 31.3960065             | 25.54213975                                          | 35.82238425 | 31.2218048  |             |                |             |     |     |
| 41.25472265            |                                                      |             |             |             |                |             |     |     |
| ENSG00000144152        | 112.2252825                                          | 99.18377207 | 308.9842995 |             |                |             |     |     |
| 34.15565955            | 96.86914701                                          | 80.4596726  | 173.4644514 |             |                |             |     |     |
| 70.49482638            | 1.298286151                                          | 0.007921646 | 0.051553085 | FBLN7       |                |             |     |     |
| 2                      | 112138385                                            | 112188216   | +           | 6578        |                |             |     |     |
| protein_coding         | fibulin 7 [Source:HGNC Symbol;Acc:HGNC:26740]        |             |             |             | -              |             |     |     |
| 97                     | 107                                                  | 316         | 34          | 106         | 82             | 0.80644096  |     |     |
| 0.717172894            | 2.225336387                                          | 0.249911513 | 0.702215795 |             |                |             |     |     |
| 0.581923665            |                                                      |             |             |             |                |             |     |     |
| ENSG00000277342        | 0                                                    | 7.415609127 | 2.933395248 | 53.24264577 |                |             |     |     |
| 15.53561792            | 13.73701727                                          | 3.449668125 | 27.50509365 |             |                |             |     |     |
| -2.963025456           | 0.007931673                                          | 0.051579025 | AC048344.4  |             |                |             |     |     |
| 12                     | 32109076                                             | 32109602    | +           | 527         |                |             |     |     |
| sense_intronic         | "novel transcript, sense intronic to BICD1"          |             |             |             | -              |             |     |     |
| 0                      | 8                                                    | 3           | 53          | 17          | 14             | 0           |     |     |
| 0.669288449            | 0.263701801                                          | 4.862576769 | 1.405713786 |             |                |             |     |     |
| 1.240119271            |                                                      |             |             |             |                |             |     |     |
| ENSG00000167680        | 350.5593877                                          | 598.810437  | 651.2137452 |             |                |             |     |     |

|                                                   |                                                 |             |             |                |
|---------------------------------------------------|-------------------------------------------------|-------------|-------------|----------------|
| 802.6579994                                       | 831.6124884                                     | 789.8784932 | 533.5278566 |                |
| 808.0496603                                       | -0.597268506                                    | 0.00793238  | 0.051579025 | SEMA6B         |
| 19                                                | 4542593                                         | 4559808     | -           | 4412           |
| protein_coding                                    |                                                 |             |             | protein_coding |
| semaphorin 6B [Source:HGNC Symbol;Acc:HGNC:10739] |                                                 |             |             | -              |
| 646                                               | 666                                             | 799         | 910         | 805            |
| 6.455516154                                       | 6.992640178                                     | 8.756135872 | 3.755794637 | 8.988029441    |
| 8.517387626                                       |                                                 |             |             |                |
| ENSG00000134070                                   | 566.9112211                                     | 624.7650689 | 600.3682275 |                |
| 306.3963577                                       | 509.9338116                                     | 371.8806819 | 597.3481725 |                |
| 396.0702837                                       | 0.592248197                                     | 0.00793887  | 0.051599279 | IRAK2          |
| 3                                                 | 10164865                                        | 10243743    | +           | 3483           |
| protein_coding                                    | interleukin 1 receptor associated kinase 2      |             |             |                |
| [Source:HGNC Symbol;Acc:HGNC:6113]                |                                                 |             |             | -              |
| 305                                               | 558                                             | 379         | 490         | 674            |
| 8.16614999                                        | 4.233968098                                     | 6.981348568 | 8.531794377 | 614            |
| ENSG00000133739                                   | 749.7111659                                     | 701.7020136 | 567.1230814 |                |
| 461.1014039                                       | 539.1773277                                     | 368.9370353 | 672.8454203 |                |
| 456.4052556                                       | 0.559157753                                     | 0.007961736 | 0.051725904 | LRRCC1         |
| 8                                                 | 85107147                                        | 85146076    | +           | 5065           |
| protein_coding                                    | leucine rich repeat and coiled-coil centrosomal |             |             |                |
| protein 1 [Source:HGNC Symbol;Acc:HGNC:29373]     |                                                 |             |             | -              |
| 580                                               | 459                                             | 590         | 376         | 6.996651926    |
| 5.304579953                                       | 4.381617398                                     | 5.076111577 | 3.465408458 | 6.589468523    |
| ENSG00000158373                                   | 146.9341328                                     | 92.69511408 | 50.84551764 |                |
| 176.8057671                                       | 181.8581156                                     | 228.623216  | 96.82492151 |                |
| 195.7623662                                       | -1.019885642                                    | 0.007990926 | 0.051878297 |                |
| HIST1H2BD                                         | 6                                               | 26158146    | 26171349    | +              |
| protein_coding                                    | histone cluster 1 H2B family member d           |             |             |                |
| [Source:HGNC Symbol;Acc:HGNC:4747]                |                                                 |             |             | -              |
| 176                                               | 199                                             | 233         | 7.974074313 | 5.061926128    |
| 2.765589034                                       | 9.770026221                                     | 9.956197868 | 12.48773867 |                |
| ENSG00000228335                                   | 0                                               | 3.707804563 | 5.866790497 | 26.11903377    |
| 23.76035681                                       | 21.58674143                                     | 3.191531687 | 23.822044   |                |
| -2.872683105                                      | 0.007991979                                     | 0.051878297 | AC073063.1  |                |
| 7                                                 | 99442890                                        | 99443496    | -           | 607            |
| processed_pseudogene                              | cytokine induced protein 29 kDa (CIP29)         |             |             |                |
| pseudogene                                        |                                                 |             |             | -              |
| 0                                                 | 0.290539549                                     | 0.457894066 | 2.071027537 | 26             |
| 1.866565587                                       | 1.691920785                                     |             |             | 26             |
| ENSG00000197747                                   | 3281.143312                                     | 3862.605404 | 3945.416609 | 22             |
| 1454.629265                                       | 2793.669645                                     | 3184.044361 | 3696.388442 |                |
| 2477.447757                                       | 0.577243403                                     | 0.007995808 | 0.051881116 |                |
| S100A10 1                                         | 151982915                                       | 151994390   | -           | 1543           |
| protein_coding                                    | S100 calcium binding protein A10 [Source:HGNC   |             |             |                |
| Symbol;Acc:HGNC:10487]                            |                                                 |             |             | -              |
| 3245                                              | 100.5159573                                     | 119.0670332 | 121.1379079 | 4035           |
| 45.37366417                                       | 86.33524194                                     | 98.17362128 |             | 1448           |
| ENSG00000272405                                   | 480.1390954                                     | 391.1733814 | 596.4570339 | 3057           |
| 802.6579994                                       | 552.8852258                                     | 879.1691054 | 489.2565036 |                |
| 744.9041102                                       | -0.60631082                                     | 0.00801402  | 0.05197723  |                |

|                                     |                                                      |                                       |                |                          |                |
|-------------------------------------|------------------------------------------------------|---------------------------------------|----------------|--------------------------|----------------|
| AL365181.3                          | 1                                                    | 156641666                             | 156644887      | -                        | 3222           |
|                                     | antisense                                            | "novel transcript, antisense to BCAN" |                |                          | -              |
|                                     | 415                                                  | 422                                   | 610            | 799                      | 605 896        |
|                                     | 5.774586256                                          | 8.770144615                           | 11.99009046    | 8.182545639              |                |
|                                     | 12.98160856                                          |                                       |                |                          |                |
| ENSG0000057149                      | 0                                                    | 0                                     | 0              | 18.082408                | 0              |
| 14.71823279                         | 0                                                    | 10.93354693                           | -5.869095804   | 0.008016589              |                |
|                                     | 1                                                    | SERPINB3                              | 18             | 63655197                 | 63661963       |
|                                     | -                                                    | 1777                                  | protein_coding | serpin family B member 3 |                |
| [Source:HGNC Symbol;Acc:HGNC:10569] |                                                      |                                       | -              | 0                        | 0 0            |
|                                     | 18                                                   | 0                                     | 15             | 0                        | 0              |
|                                     | 0                                                    | 0.394048671                           |                |                          | 0.489763362    |
| ENSG00000150403                     | 1552.642569                                          | 1484.975728                           | 1527.321126    |                          |                |
| 1148.232908                         | 1217.261357                                          | 1168.627684                           | 1521.646474    |                          |                |
| 1178.040649                         | 0.369050583                                          | 0.008024543                           | 0.052023405    | TMC03                    |                |
|                                     | 13                                                   | 113490995                             | 113554590      | +                        | 10407          |
| protein_coding                      | transmembrane and coiled-coil domains 3 [Source:HGNC |                                       |                |                          |                |
| Symbol;Acc:HGNC:20329]              | -                                                    | 1342                                  | 1602           | 1562                     | 1143 1332      |
|                                     | 1191                                                 | 7.052152156                           | 6.786891638    | 6.952771085              |                |
| 5.310334671                         | 5.577470321                                          | 5.34234884                            |                |                          |                |
| ENSG00000267198                     | 17.35442514                                          | 0                                     | 14.66697624    | 0                        | 0              |
|                                     | 0                                                    | 10.67380046                           | 0              | 5.906100205              | 0.008031882    |
|                                     | 1                                                    | AC091132.4                            | 17             | 45545804                 | 45563230       |
|                                     | +                                                    | 2278                                  | lincRNA        | novel transcript         | - 15           |
|                                     | 0                                                    | 15                                    | 0              | 0                        | 0.360107571 0  |
|                                     | 0.305028202                                          | 0                                     | 0              | 0                        |                |
| ENSG00000113649                     | 2561.51315                                           | 2441.589305                           | 2774.991905    |                          |                |
| 2139.751613                         | 2035.165947                                          | 1920.238772                           | 2592.69812     |                          |                |
| 2031.718777                         | 0.351762192                                          | 0.008063052                           | 0.052233665    | TCERG1                   |                |
|                                     | 5                                                    | 146447311                             | 146511961      | +                        | 8714           |
| protein_coding                      | transcription elongation regulator 1 [Source:HGNC    |                                       |                |                          |                |
| Symbol;Acc:HGNC:15630]              | -                                                    | 2214                                  | 2634           | 2838                     | 2130 2227      |
|                                     | 1957                                                 | 13.89487914                           | 13.3269931     | 15.0868055               |                |
| 11.81852462                         | 11.13682151                                          | 10.48381397                           |                |                          |                |
| ENSG00000167333                     | 386.4251997                                          | 417.1280134                           | 346.1406393    |                          |                |
| 504.2982675                         | 595.8366401                                          | 551.4431219                           | 383.2312841    |                          |                |
| 550.5260098                         | -0.522697988                                         | 0.008063809                           | 0.052233665    | TRIM68                   |                |
|                                     | 11                                                   | 4598672 4608259                       | -              | 4282                     | protein_coding |
| tripartite motif                    | containing 68 [Source:HGNC Symbol;Acc:HGNC:21161]    |                                       |                |                          |                |
|                                     | -                                                    | 334                                   | 450            | 354                      | 502 652 562    |
| 4.265741328                         | 4.633400154                                          | 3.829649737                           | 5.668371042    |                          |                |
| 6.635284221                         | 6.126828                                             |                                       |                |                          |                |
| ENSG00000122140                     | 910.5288388                                          | 1311.635864                           | 1065.800274    |                          |                |
| 1459.652157                         | 1523.404416                                          | 1491.44759                            | 1095.988326    |                          |                |
| 1491.501387                         | -0.443697663                                         | 0.008083175                           | 0.052312168    | MRPS2                    |                |
|                                     | 9                                                    | 135499984                             | 135504673      | +                        | 2464           |
| protein_coding                      | mitochondrial ribosomal protein S2 [Source:HGNC      |                                       |                |                          |                |
| Symbol;Acc:HGNC:14495]              | -                                                    | 787                                   | 1415           | 1090                     | 1453 1667      |
|                                     | 1520                                                 | 17.46741914                           | 25.31918338    | 20.49218416              |                |
| 28.51189791                         | 29.48176595                                          | 28.79711099                           |                |                          |                |



|                                    |                                                      |             |                |             |
|------------------------------------|------------------------------------------------------|-------------|----------------|-------------|
| ENSG00000166685                    | 1014.65539                                           | 1157.761975 | 973.8872225    |             |
| 1518.922272                        | 1267.52365                                           | 1406.081839 | 1048.768196    |             |
| 1397.509254                        | -0.413710752                                         | 0.008085496 | 0.052312168    | COG1        |
| 17                                 | 73192632                                             | 73208507    | + 5317         |             |
| protein_coding                     | component of oligomeric golgi complex 1 [Source:HGNC |             |                |             |
| Symbol;Acc:HGNC:6545]              | -                                                    | 877 1249    | 996 1512       | 1387        |
| 1433                               | 9.020438415                                          | 10.35689888 | 8.677510221    |             |
| 13.74948233                        | 11.36758993                                          | 12.58130138 |                |             |
| ENSG00000110075                    | 3329.735703                                          | 2752.117937 | 3061.486841    |             |
| 2263.314734                        | 2559.721517                                          | 2286.23216  | 3047.78016     |             |
| 2369.756137                        | 0.362671881                                          | 0.008086194 | 0.052312168    | PPP6R3      |
| 11                                 | 68460731                                             | 68615334    | + 8305         |             |
| protein_coding                     | protein phosphatase 6 regulatory subunit 3           |             |                |             |
| [Source:HGNC Symbol;Acc:HGNC:1173] | -                                                    | 2878 2969   |                | 3131        |
| 2253                               | 2801 2330                                            | 18.95159931 | 15.76175305    |             |
| 17.46408702                        | 13.11664521                                          | 14.69711423 | 13.09671329    |             |
| ENSG00000108559                    | 1859.237413                                          | 1839.998015 | 2251.869752    |             |
| 1471.707095                        | 1550.820212                                          | 1537.564719 | 1983.701727    |             |
| 1520.030675                        | 0.384171213                                          | 0.008090316 | 0.05231669     | NUP88       |
| 17                                 | 5360963 5420160                                      | - 5294      | protein_coding |             |
| nucleoporin 88                     | [Source:HGNC Symbol;Acc:HGNC:8067]                   |             |                |             |
| 1985                               | 2303 1465                                            | 1697 1567   | 16.6007096     | 1607        |
| 16.53143417                        | 20.15173562                                          | 13.37996275 | 13.96871649    |             |
| 13.81755161                        |                                                      |             |                |             |
| ENSG00000026508                    | 12451.22155                                          | 11904.8335  | 13365.52655    |             |
| 7851.783383                        | 10001.2825                                           | 11130.90885 | 12573.86054    |             |
| 9661.324912                        | 0.380109497                                          | 0.008099136 | 0.052349207    | CD44        |
| 11                                 | 35138870                                             | 35232402    | + 10004        |             |
| protein_coding                     | CD44 molecule (Indian blood group) [Source:HGNC      |             |                |             |
| Symbol;Acc:HGNC:1681]              | -                                                    | 10762 12843 | 13669 7816     | 10944       |
| 11344                              | 58.83205485                                          | 56.6013458  | 63.29443336    |             |
| 37.77566202                        | 47.67173948                                          | 52.93447018 |                |             |
| ENSG000000267481                   | 0                                                    | 3.707804563 | 11.73358099    | 33.15108133 |
| 29.24351608                        | 33.36132766                                          | 5.147128519 | 31.91864169    |             |
| -2.613678009                       | 0.008102193                                          | 0.052349207 | AC011477.2     |             |
| 19                                 | 19788755                                             | 19790531    | - 921          |             |
| sense_intronic                     | "novel transcript, sense intronic to ZNF506"         |             |                |             |
| 0                                  | 4 12                                                 | 33 32       | 34 0           | -           |
| 0.191484806                        | 0.603565033                                          | 1.732429324 | 1.514080429    |             |
| 1.723317597                        |                                                      |             |                |             |
| ENSG00000071082                    | 6227.9247                                            | 9326.055428 | 7631.716638    |             |
| 7976.351083                        | 11372.07231                                          | 13147.30675 | 7728.565589    |             |
| 10831.91005                        | -0.486917186                                         | 0.008121633 | 0.05245264     | RPL31       |
| 2                                  | 101001715                                            | 101024032   | + 5791         |             |
| protein_coding                     | ribosomal protein L31 [Source:HGNC                   |             |                |             |
| Symbol;Acc:HGNC:10334]             | -                                                    | 5383 10061  | 7805 7940      | 12444       |
| 13399                              | 50.83531601                                          | 76.59872522 | 62.43409175    |             |
| 66.29307344                        | 93.64078273                                          | 108.0102218 |                |             |
| ENSG00000185650                    | 3541.459689                                          | 3878.363573 | 3541.585863    |             |
| 4667.27042                         | 4355.456176                                          | 4674.510735 | 3653.803042    |             |

|                        |                                               |             |             |               |
|------------------------|-----------------------------------------------|-------------|-------------|---------------|
| 4565.745777            | -0.321309164                                  | 0.008144787 | 0.052579963 |               |
| ZFP36L1 14             | 68787660                                      | 68796253    | -           | 5160          |
| protein_coding         | ZFP36 ring finger protein like 1 [Source:HGNC |             |             |               |
| Symbol;Acc:HGNC:1107]  | Others                                        | 3061        | 4184        | 3622 4646     |
|                        | 4764                                          | 32.44205384 | 35.74999062 | 32.51630587   |
| 43.53421526            | 40.24972654                                   | 43.09908866 |             |               |
| ENSG00000151849        | 266.1011854                                   | 269.742782  | 358.8520187 |               |
| 176.8057671            | 144.3898606                                   | 219.7922764 | 298.2319954 |               |
| 180.3293014            | 0.726859299                                   | 0.008157349 | 0.052638833 | CENPJ         |
| 13                     | 24882284                                      | 24922889    | -           | 5812          |
| protein_coding         | centromere protein J [Source:HGNC             |             |             |               |
| Symbol;Acc:HGNC:17272] | -                                             | 230         | 291         | 367 176       |
|                        | 224                                           | 2.16419776  | 2.207503198 | 2.925114795   |
| 1.464159126            | 1.184650055                                   | 1.799154455 |             |               |
| ENSG00000273102        | 28.92404189                                   | 11.12341369 | 8.800185745 | 0             |
| 0                      | 2.943646558                                   | 16.28254711 | 0.981215519 |               |
| 4.059374208            | 0.008170554                                   | 1           | AP000569.1  | 21            |
| 33967101               | 33968573                                      | -           | 591         | lincRNA novel |
| transcript             | -                                             | 25          | 12          | 9 0 0         |
|                        | 2.313381406                                   | 0.895215768 | 0.705435781 | 0             |
|                        | 0.236962602                                   |             |             |               |
| ENSG00000091140        | 2162.361372                                   | 2118.083357 | 1760.037149 |               |
| 1359.194334            | 1601.082505                                   | 1615.080745 | 2013.493959 |               |
| 1525.119195            | 0.400513758                                   | 0.008170838 | 0.052703632 | DLD           |
| 7                      | 107890970                                     | 107931730   | +           | 5299          |
| protein_coding         | dihydrolipoamide dehydrogenase [Source:HGNC   |             |             |               |
| Symbol;Acc:HGNC:2898]  | -                                             | 1869        | 2285        | 1800 1353     |
|                        | 1646                                          | 19.28901694 | 19.01193159 | 15.7355179    |
| 12.34539794            | 14.40783679                                   | 14.50046559 |             |               |
| ENSG00000234678        | 61.31896881                                   | 61.1787753  | 39.11193665 |               |
| 18.082408              | 12.79403828                                   | 22.56795695 | 53.86989359 |               |
| 17.81480108            | 1.597635745                                   | 0.008181396 | 0.052729997 | ELF3-         |
| AS1 1                  | 201995696                                     | 202010463   | -           | 5569          |
| antisense              | ELF3 antisense RNA 1 [Source:HGNC             |             |             |               |
| Symbol;Acc:HGNC:40211] | -                                             | 53          | 66          | 40 18         |
|                        | 23                                            | 0.520467199 | 0.522517302 | 0.332724843   |
| 0.156277517            | 0.109549252                                   | 0.192795394 |             |               |
| ENSG00000076321        | 814.5010197                                   | 798.1049323 | 692.2812786 |               |
| 1102.02231             | 998.848846                                    | 998.8773988 | 768.2957435 |               |
| 1033.249518            | -0.427646873                                  | 0.008183966 | 0.052729997 | KLHL20        |
| 1                      | 173714941                                     | 173786702   | +           | 4254          |
| protein_coding         | kelch like family member 20 [Source:HGNC      |             |             |               |
| Symbol;Acc:HGNC:25056] | -                                             | 704         | 861         | 708 1097      |
|                        | 1018                                          | 9.050444017 | 8.923590323 | 7.709713293   |
| 12.46838944            | 11.19647395                                   | 11.17111    |             |               |
| ENSG00000203364        | 8.09873173                                    | 0           | 0           | 25.11445555   |
| 33.81281546            | 17.66187935                                   | 2.699577243 |             |               |
| 25.52971679            | -3.30020255                                   | 0.008188533 | 0.052729997 |               |
| AL390760.1             | 9                                             | 93147040    | 93148556    | +             |
|                        | lincRNA novel transcript                      | -           | 7           | 0             |
|                        |                                               |             |             | 410           |
|                        |                                               |             |             | 0             |

|                        |                                               |           |              |             |       |       |
|------------------------|-----------------------------------------------|-----------|--------------|-------------|-------|-------|
| 25                     | 37                                            | 18        | 0.933703305  | 0           | 0     |       |
| 2.948202896            | 3.932570029                                   |           | 2.049437527  |             |       |       |
| ENSG00000166741        | 1088.700937                                   |           | 1304.220255  | 1445.186059 |       |       |
| 952.3401545            | 954.9835719                                   |           | 945.8917608  | 1279.369084 |       |       |
| 951.071829             | 0.428350833                                   |           | 0.008188723  | 0.052729997 |       | NNMT  |
| 11                     | 114257787                                     |           | 114313285    | +           | 2919  |       |
| protein_coding         | nicotinamide N-methyltransferase              |           | [Source:HGNC |             |       |       |
| Symbol;Acc:HGNC:7861]  | -                                             |           | 941          | 1407        | 1478  | 948   |
| 964                    | 17.62991592                                   |           | 21.25171389  | 23.45539737 |       | 1045  |
| 15.70274069            | 15.60058174                                   |           | 15.41661315  |             |       |       |
| ENSG00000092010        | 1919.39942                                    |           | 1548.935356  | 1908.662508 |       |       |
| 888.0471483            | 1548.078632                                   |           | 1312.866365  | 1792.332428 |       |       |
| 1249.664049            | 0.51979368                                    |           | 0.008192416  | 0.052731562 |       | PSME1 |
| 14                     | 24136158                                      |           | 24138967     | +           | 1781  |       |
| protein_coding         | proteasome activator subunit 1                |           | [Source:HGNC |             |       |       |
| Symbol;Acc:HGNC:9568]  | -                                             |           | 1659         | 1671        | 1952  | 884   |
| 1338                   | 50.94213933                                   |           | 41.36628201  | 50.77130772 |       | 1694  |
| 23.99880197            | 41.44842995                                   |           | 35.07019897  |             |       |       |
| ENSG00000115687        | 503.2783289                                   |           | 612.7147041  | 645.3469547 |       |       |
| 424.9365879            | 362.8023713                                   |           | 433.6972596  | 587.1133292 |       |       |
| 407.1454063            | 0.529226706                                   |           | 0.008197818  | 0.052744125 |       | PASK  |
| 2                      | 241106099                                     |           | 241150264    | -           | 10686 |       |
| protein_coding         | PAS domain containing serine/threonine kinase |           | [Source:HGNC |             |       |       |
| Symbol;Acc:HGNC:17270] | -                                             |           |              | 435         | 661   | 660   |
| 423                    | 397                                           | 442       | 2.22622369   | 2.727220468 |       |       |
| 2.861088037            | 1.913931605                                   |           | 1.618951858  | 1.930870446 |       |       |
| ENSG00000274386        | 10.41265508                                   |           | 5.561706845  | 14.66697624 |       |       |
| 52.23806755            | 15.53561792                                   |           | 60.83536221  | 10.21377939 |       |       |
| 42.86968256            | -2.070772642                                  |           | 0.008232434  | 0.052944563 |       |       |
| TMEM269                | 1                                             | 42785007  | 42816619     | +           | 4373  |       |
| protein_coding         | transmembrane protein 269                     |           | [Source:HGNC |             |       |       |
| Symbol;Acc:HGNC:52381] | -                                             |           | 9            | 6           | 15    | 52    |
| 62                     | 0.112553174                                   |           | 0.060493085  | 0.158896466 |       | 17    |
| 0.574943387            | 0.169405709                                   |           | 0.66184798   |             |       |       |
| ENSG00000130349        | 275.3568788                                   |           | 380.9769189  | 303.117509  |       |       |
| 368.6802075            | 535.5218882                                   |           | 594.6166048  | 319.8171022 |       |       |
| 499.6062335            | -0.642596134                                  |           | 0.008248344  | 0.053024573 |       |       |
| C6orf203               | 6                                             | 107028213 | 107051342    | +           |       | 2036  |
| protein_coding         | chromosome 6 open reading frame 203           |           | [Source:HGNC |             |       |       |
| Symbol;Acc:HGNC:17971] | -                                             |           |              | 238         | 411   | 310   |
| 367                    | 586                                           | 606       | 6.392840899  | 8.900163936 |       |       |
| 7.053202877            | 8.715443806                                   |           | 12.54233626  | 13.89443484 |       |       |
| ENSG00000164330        | 78.67339395                                   |           | 74.15609127  | 132.0027862 |       |       |
| 46.21059821            | 41.12369448                                   |           | 36.30497422  | 94.94409047 |       |       |
| 41.21308897            | 1.204873921                                   |           | 0.008256412  | 0.053043415 |       | EBF1  |
| 5                      | 158695916                                     |           | 159099761    | -           | 6178  |       |
| protein_coding         | early B cell factor 1                         |           | [Source:HGNC |             |       |       |
| Symbol;Acc:HGNC:3126]  | COE                                           |           | 68           | 80          | 135   | 46    |
| 37                     | 0.601943489                                   |           | 0.57092103   | 1.012251247 |       | 45    |
| 0.360007165            | 0.317411902                                   |           | 0.27957598   |             |       |       |

|                         |                                                        |                                       |                   |                     |
|-------------------------|--------------------------------------------------------|---------------------------------------|-------------------|---------------------|
| ENSG00000283689         | 49.74935206                                            | 58.39792187                           | 39.11193665       |                     |
| 94.43035287             | 108.7493254                                            | 109.8961382                           | 49.08640353       |                     |
| 104.3586055             | -1.087782983                                           | 0.008258215                           | 0.053043415       |                     |
| AC018553.2              | 16                                                     | 54285604                              | 54289568          | + 1064              |
| antisense               |                                                        | "novel transcript, antisense to IRX3" |                   | -                   |
| 43                      | 63                                                     | 40                                    | 94                | 119 112 2.210148935 |
|                         | 2.610555192                                            | 1.741489335                           | 4.271569158       | 4.873757665         |
|                         | 4.913856058                                            |                                       |                   |                     |
| ENSG00000181333         | 9.255693406                                            | 1.853902282                           | 15.64477466       | 0                   |
| 0                       | 0                                                      | 8.918123449                           | 0                 | 5.64856094          |
| 0.008269563             | 1                                                      | HEPHL1                                | 11                | 94021361 94113751   |
| +                       | 5345                                                   | protein_coding                        | hephaestin like 1 | [Source:HGNC        |
| Symbol;Acc:HGNC:30477]  | -                                                      | 8                                     | 2                 | 16 0 0              |
| 0                       | 0.08185345                                             | 0.016497428                           | 0.138667514       | 0                   |
| 0                       | 0                                                      |                                       |                   |                     |
| ENSG00000112378         | 1080.602205                                            | 995.5455253                           | 823.3062664       |                     |
| 1196.452662             | 1368.962096                                            | 1350.152555                           | 966.4846656       |                     |
| 1305.189105             | -0.434035023                                           | 0.008272851                           | 0.053115106       | PERP                |
| 6                       | 138088505                                              | 138107511                             | -                 | 4290                |
| protein_coding          | "PERP, TP53 apoptosis effector [Source:HGNC            |                                       |                   |                     |
| Symbol;Acc:HGNC:17637]" | -                                                      | 934                                   | 1074              | 842 1191 1498       |
| 1376                    | 11.90650495                                            | 11.03776001                           | 9.09195453        |                     |
| 13.4231884              | 15.21644214                                            | 14.97294322                           |                   |                     |
| ENSG0000010327          | 38.1797353                                             | 37.07804563                           | 58.66790497       |                     |
| 16.07325155             | 8.224738897                                            | 14.71823279                           | 44.6418953        |                     |
| 13.00540775             | 1.783073935                                            | 0.008279069                           | 0.053132714       | STAB1               |
| 3                       | 52495338                                               | 52524495                              | +                 | 10588               |
| protein_coding          | stabilin 1 [Source:HGNC Symbol;Acc:HGNC:18628]         |                                       | -                 |                     |
| 33                      | 40                                                     | 60                                    | 16                | 9 15 0.170449103    |
|                         | 0.166563568                                            | 0.262506326                           | 0.073064643       | 0.037041381         |
|                         | 0.066133782                                            |                                       |                   |                     |
| ENSG00000153993         | 77.51643227                                            | 42.63975248                           | 44.97872714       |                     |
| 6.027469332             | 10.05245865                                            | 29.43646558                           | 55.04497063       |                     |
| 15.17213119             | 1.857722741                                            | 0.008298025                           | 0.05323202        | SEMA3D              |
| 7                       | 84995553                                               | 85186855                              | -                 | 8062                |
| protein_coding          | semaphorin 3D [Source:HGNC Symbol;Acc:HGNC:10726]      |                                       |                   |                     |
| -                       | 67                                                     | 46                                    | 46                | 6 11 30             |
| 0.454492501             | 0.251564292                                            | 0.264312373                           | 0.035984019       |                     |
| 0.059457753             | 0.173709871                                            |                                       |                   |                     |
| ENSG00000128609         | 1966.834849                                            | 1670.365956                           | 1496.031577       |                     |
| 1227.594587             | 1358.909638                                            | 1277.542606                           | 1711.07746        |                     |
| 1288.01561              | 0.40919701                                             | 0.008326674                           | 0.0533934         | NDUFA5              |
| 7                       | 123536997                                              | 123558255                             | -                 | 9851                |
| protein_coding          | NADH:ubiquinone oxidoreductase subunit A5 [Source:HGNC |                                       |                   |                     |
| Symbol;Acc:HGNC:7688]"  | -                                                      | 1700                                  | 1802              | 1530 1222 1487      |
| 1302                    | 9.437638                                               | 8.065075281                           | 7.194714543       |                     |
| 5.997801705             | 6.577929994                                            | 6.169879767                           |                   |                     |
| ENSG00000140939         | 681.450427                                             | 859.2837076                           | 758.7715709       |                     |
| 1068.871228             | 901.0658391                                            | 1231.425477                           | 766.5019018       |                     |
| 1067.120848             | -0.476472102                                           | 0.008340782                           | 0.053442703       | NOL3                |

|                                                       |                                                        |             |      |             |                   |
|-------------------------------------------------------|--------------------------------------------------------|-------------|------|-------------|-------------------|
| 16                                                    | 67170154                                               | 67175735    | +    | 2992        |                   |
| protein_coding                                        | nucleolar protein 3 [Source:HGNC Symbol;Acc:HGNC:7869] |             |      |             |                   |
| -                                                     | 589                                                    | 927         | 776  | 1064        | 986 1255          |
| 10.76585233                                           | 13.66004415                                            | 12.01441386 |      |             | 17.19417154       |
| 14.36064424                                           | 19.58069815                                            |             |      |             |                   |
| ENSG00000138356                                       | 1099.113592                                            | 1079.898079 |      |             | 887.8409619       |
| 1357.185178                                           | 1275.748389                                            | 1462.99234  |      |             | 1022.284211       |
| 1365.308635                                           | -0.417618243                                           | 0.008341355 |      |             | 0.053442703 AOX1  |
| 2                                                     | 200585868                                              | 200677064   | +    | 5556        |                   |
| protein_coding                                        | aldehyde oxidase 1 [Source:HGNC Symbol;Acc:HGNC:553]   |             |      |             |                   |
| -                                                     | 950                                                    | 1165        | 908  | 1351        | 1396 1491         |
| 9.350957453                                           | 9.244802684                                            | 7.570526208 |      |             | 11.75694072       |
| 10.94918463                                           | 12.52741435                                            |             |      |             |                   |
| ENSG00000166847                                       | 2119.55379                                             | 2246.002614 |      |             | 2124.755958       |
| 2777.658784                                           | 2631.916447                                            | 2761.140472 |      |             | 2163.437454       |
| 2723.571901                                           | -0.332024271                                           | 0.008349957 |      |             | 0.053475406 DCTN5 |
| 16                                                    | 23641392                                               | 23677455    | +    | 12740       |                   |
| protein_coding                                        | dynactin subunit 5 [Source:HGNC Symbol;Acc:HGNC:24594] |             |      |             |                   |
| -                                                     | 1832                                                   | 2423        | 2173 | 2765        | 2880 2814         |
| 7.864131267                                           | 8.385287241                                            | 7.901194525 |      |             | 10.49365844       |
| 9.851030359                                           | 10.31099796                                            |             |      |             |                   |
| ENSG00000164654                                       | 1227.536338                                            | 983.4951604 |      |             | 1056.022289       |
| 828.7770332                                           | 705.4998254                                            | 859.5447951 |      |             | 1089.017929       |
| 797.9405512                                           | 0.448334615                                            | 0.008355044 |      |             | 0.053485574 MIOS  |
| 7                                                     | 7566872                                                | 7608929     | +    | 6714        | protein_coding    |
| meiosis regulator for oocyte development [Source:HGNC |                                                        |             |      |             |                   |
| Symbol;Acc:HGNC:21905]                                | -                                                      | 1061        | 1061 | 1080        | 825 772           |
| 876                                                   | 8.642288495                                            | 6.967356055 |      |             | 7.45152005        |
| 5.941195291                                           | 5.010655692                                            | 6.090722389 |      |             |                   |
| ENSG00000229751                                       | 0                                                      | 1.853902282 | 0    |             | 27.12361199       |
| 8.224738897                                           | 7.849724156                                            | 0.617967427 |      |             |                   |
| 14.39935835                                           | -4.469579264                                           | 0.008359956 | 1    |             | AC044781.1        |
| 10                                                    | 13991815                                               | 14007526    | +    | 570         |                   |
| antisense                                             | novel transcript                                       |             |      |             |                   |
| 27                                                    | 9                                                      | 8           | 0    | 0.154699567 | 0                 |
| 2.290288144                                           | 0.688059906                                            | 0.655180808 |      |             |                   |
| ENSG00000141576                                       | 386.4251997                                            | 443.0826453 |      |             | 632.6355753       |
| 367.6756293                                           | 288.7797213                                            | 277.683992  |      |             | 487.3811401       |
| 311.3797808                                           | 0.647436618                                            | 0.008365068 |      |             | 0.05352733 RNF157 |
| 17                                                    | 76142453                                               | 76240373    | -    | 7805        |                   |
| protein_coding                                        | ring finger protein 157 [Source:HGNC                   |             |      |             |                   |
| Symbol;Acc:HGNC:29402]                                | -                                                      | 334         | 478  | 647         | 366 316           |
| 283                                                   | 2.34028243                                             | 2.700156567 |      |             | 3.840023031       |
| 2.267302122                                           | 1.764301377                                            | 1.692620373 |      |             |                   |
| ENSG00000138430                                       | 3426.920483                                            | 2982.928771 |      |             | 2915.794877       |
| 2281.397142                                           | 2579.826434                                            | 2432.433273 |      |             | 3108.548044       |
| 2431.21895                                            | 0.354233722                                            | 0.00837579  |      |             | 0.053573518 OLA1  |
| 2                                                     | 174072447                                              | 174248698   | -    | 6100        |                   |
| protein_coding                                        | Obg like ATPase 1 [Source:HGNC Symbol;Acc:HGNC:28833]  |             |      |             |                   |
| -                                                     | 2962                                                   | 3218        | 2982 | 2271        | 2823 2479         |

|                                            |                                     |                                    |              |             |
|--------------------------------------------|-------------------------------------|------------------------------------|--------------|-------------|
| 26.55522172                                | 23.25895309                         | 22.64541375                        | 18.0006636   |             |
| 20.16692304                                | 18.97110936                         |                                    |              |             |
| ENSG00000162434                            | 3923.257042                         | 3129.387052                        | 3695.100215  |             |
| 2824.87396                                 | 2858.553697                         | 2711.09848                         | 3582.581436  |             |
| 2798.175379                                | 0.356257205                         | 0.008392822                        | 0.053660005  | JAK1        |
| 1                                          | 64833229                            | 64966504                           | - 6317       |             |
| protein_coding                             | Janus kinase 1                      | [Source:HGNC Symbol;Acc:HGNC:6190] |              |             |
| -                                          | 3391 3376                           | 3779 2812                          | 3128 2763    |             |
| 29.35699681                                | 23.56272524                         | 27.71203832                        | 21.52314126  |             |
| 21.57816279                                | 20.41813373                         |                                    |              |             |
| ENSG00000164332                            | 1335.133774                         | 1114.195271                        | 1032.555127  |             |
| 881.0151007                                | 839.8372273                         | 860.5260106                        | 1160.628058  |             |
| 860.4594462                                | 0.431164566                         | 0.008402818                        | 0.053701454  | UBLCP1      |
| 5                                          | 159263081                           | 159286040                          | + 2676       |             |
| protein_coding                             | ubiquitin like domain containing    | CTD phosphatase 1                  |              |             |
| [Source:HGNC Symbol;Acc:HGNC:28110]        | -                                   | 1154                               | 1202         | 1056        |
| 877                                        | 919 877                             | 23.58383417                        | 19.80397259  |             |
| 18.28017146                                | 15.84581936                         | 14.96538865                        | 15.29887584  |             |
| ENSG00000115649                            | 851.5237933                         | 1256.018796                        | 1052.111096  |             |
| 1458.647578                                | 1362.565077                         | 1511.0719                          | 1053.217895  |             |
| 1444.094852                                | -0.454368086                        | 0.008419932                        | 0.05378834   | CNPPD1      |
| 2                                          | 219171897                           | 219178106                          | - 2760       |             |
| protein_coding                             | cyclin Pas1/PH080 domain containing | 1 [Source:HGNC                     |              |             |
| Symbol;Acc:HGNC:25220]                     | -                                   | 736 1355                           | 1076 1452    | 1491        |
| 1540                                       | 14.58355638                         | 21.64532799                        | 18.05949679  |             |
| 25.43658185                                | 23.54112206                         | 26.04699787                        |              |             |
| ENSG00000113273                            | 679.1365036                         | 621.0572644                        | 650.2359467  |             |
| 533.4310359                                | 445.9636202                         | 384.6364836                        | 650.1432383  |             |
| 454.6770466                                | 0.515840063                         | 0.008429449                        | 0.053826646  | ARSB        |
| 5                                          | 78777209                            | 78986087                           | - 9053       |             |
| protein_coding                             | arylsulfatase B                     | [Source:HGNC Symbol;Acc:HGNC:714]  |              |             |
| -                                          | 587 670                             | 665 531                            | 488 392      |             |
| 3.546012757                                | 3.262993738                         | 3.402762051                        | 2.835980349  |             |
| 2.349015591                                | 2.021340988                         |                                    |              |             |
| ENSG00000216906                            | 8.09873173                          | 10.19646255                        | 6.844588913  | 0           |
| 0                                          | 0                                   | 8.379927731                        | 0            | 5.560275282 |
| 0.008452695                                | 1                                   | AL355312.1                         | 6            | 149904243   |
| 149906418                                  | + 2176                              | processed_pseudogene               | multimerin 2 |             |
| (MMRN2) pseudogene                         | -                                   | 7 11                               | 7 0          | 0           |
| 0                                          | 0.175927553                         | 0.222878282                        | 0.149018986  | 0           |
| 0                                          | 0                                   |                                    |              |             |
| ENSG00000123572                            | 6.941770054                         | 18.53902282                        | 15.64477466  | 0           |
| 1.827719755                                | 0                                   | 13.70852251                        | 0.609239918  |             |
| 4.451377042                                | 0.008456296                         | 1                                  | NRK          | X 105822543 |
| 105958610                                  | + 9573                              | protein_coding                     | Nik related  |             |
| kinase [Source:HGNC Symbol;Acc:HGNC:25391] | -                                   | 6                                  | 20           |             |
| 16                                         | 0 2                                 | 0                                  | 0.034276613  | 0.092111933 |
| 0.077423782                                | 0                                   | 0.009104174                        | 0            |             |
| ENSG00000137996                            | 1214.80976                          | 1361.691226                        | 1336.650435  |             |
| 965.3996714                                | 1041.80026                          | 979.2530884                        | 1304.383807  |             |

|                                                   |                 |                   |                       |        |
|---------------------------------------------------|-----------------|-------------------|-----------------------|--------|
| 995.48434                                         | 0.390120713     | 0.008476404       | 0.054103875           | RTCA   |
| 1                                                 | 100266207       | 100292769         | + 3037                |        |
| protein_coding                                    | RNA 3'-terminal | phosphate cyclase | [Source:HGNC          |        |
| Symbol;Acc:HGNC:17981]                            | -               | 1050 1469         | 1367 961              | 1140   |
| 998                                               | 18.90772251     | 21.32607646       | 20.85096592           |        |
| 15.29959069                                       | 16.35756509     | 15.34022696       |                       |        |
| ENSG00000103126                                   | 1086.387013     | 1446.04378        | 1372.828976           |        |
| 1593.26106                                        | 2016.888749     | 1681.8034         | 1301.753257           |        |
| 1763.984403                                       | -0.437898149    | 0.008481642       | 0.054114714           | AXIN1  |
| 16                                                | 287440 352673   | - 7487            | protein_coding        | axin 1 |
| [Source:HGNC Symbol;Acc:HGNC:903]                 |                 | -                 | 939 1560              | 1404   |
| 1586                                              | 2207 1714       | 6.858868426       | 9.186513619           |        |
| 8.68683816                                        | 10.24227816     | 12.84556165       | 10.68683294           |        |
| ENSG00000052749                                   | 4432.32018      | 4877.616903       | 5094.329748           |        |
| 6847.205161                                       | 5289.42097      | 6372.013583       | 4801.422277           |        |
| 6169.546572                                       | -0.361525882    | 0.008511113       | 0.054280092           | RRP12  |
| 10                                                | 97356358        | 97426076          | - 8529                |        |
| protein_coding                                    | ribosomal RNA   | processing 12     | homolog [Source:HGNC  |        |
| Symbol;Acc:HGNC:29100]                            | -               | 3831 5262         | 5210 6816             | 5788   |
| 6494                                              | 24.56454647     | 27.2011138        | 28.2971088            |        |
| 38.63960551                                       | 29.57256573     | 35.54350121       |                       |        |
| ENSG00000174990                                   | 0 0             | 0 15.06867333     | 2.741579632           |        |
| 8.830939675                                       | 0               | 8.880397546       | -5.568955838          |        |
| 0.008518118                                       | 1 CA5A          | 16 87881546       | 87936580              |        |
| -                                                 | 8140            | protein_coding    | carbonic anhydrase 5A |        |
| [Source:HGNC Symbol;Acc:HGNC:1377]                |                 | -                 | 0 0 0                 |        |
| 15                                                | 3 9             | 0 0               | 0 0.089098024         |        |
| 0.016060366                                       | 0.051613599     |                   |                       |        |
| ENSG00000115641                                   | 407.2505099     | 275.3044888       | 190.6706912           |        |
| 454.0693564                                       | 483.4318752     | 480.7956045       | 291.0752299           |        |
| 472.765612                                        | -0.702130024    | 0.00853651        | 0.054419361           | FHL2   |
| 2                                                 | 105357712       | 105438513         | - 6626                |        |
| protein_coding                                    | four and a half | LIM domains 2     | [Source:HGNC          |        |
| Symbol;Acc:HGNC:3703]                             | -               | 352 297           | 195 452               | 529    |
| 490                                               | 2.905266288     | 1.976236771       | 1.363281796           |        |
| 3.298285304                                       | 3.479067366     | 3.452158158       |                       |        |
| ENSG00000214063                                   | 605.0909564     | 859.2837076       | 1074.600459           |        |
| 520.371519                                        | 532.7803085     | 646.6210273       | 846.3250411           |        |
| 566.5909516                                       | 0.579798874     | 0.008543818       | 0.054443245           | TSPAN4 |
| 11                                                | 842808 867116   | + 5841            | protein_coding        |        |
| tetraspanin 4 [Source:HGNC Symbol;Acc:HGNC:11859] |                 | -                 |                       | 523    |
| 927                                               | 1099 518        | 583 659           | 4.896764245           |        |
| 6.99723542                                        | 8.715914112     | 4.287891327       | 4.34950612            |        |
| 5.266768679                                       |                 |                   |                       |        |
| ENSG00000133195                                   | 448.9011302     | 617.3494598       | 407.7419395           |        |
| 715.2596941                                       | 857.200565      | 617.1845617       | 491.3308432           |        |
| 729.8816069                                       | -0.570394307    | 0.008549056       | 0.054453927           |        |
| SLC39A11                                          | 17 72645949     | 73092712          | -                     | 5583   |
| protein_coding                                    | solute carrier  | family 39         | member 11             |        |
| [Source:HGNC Symbol;Acc:HGNC:14463]               |                 | -                 | 388 666               | 417    |

|                                     |                                                        |     |             |             |        |
|-------------------------------------|--------------------------------------------------------|-----|-------------|-------------|--------|
| 712                                 | 938                                                    | 629 | 3.800658165 | 5.259452768 |        |
| 3.459958446                         | 6.166142858                                            |     | 7.321394494 | 5.25931343  |        |
| ENSG0000024422                      | 3600.464735                                            |     | 3629.940668 | 3822.214009 |        |
| 4043.427344                         | 4704.550649                                            |     | 5651.801392 | 3684.20647  |        |
| 4799.926462                         | -0.381645569                                           |     | 0.008573804 | 0.054588814 | EHD2   |
| 19                                  | 47713343                                               |     | 47743134    | + 3923      |        |
| protein_coding                      | EH domain containing 2 [Source:HGNC                    |     |             |             |        |
| Symbol;Acc:HGNC:3243]               | -                                                      |     | 3112 3916   | 3909 4025   | 5148   |
| 5760                                | 43.38264159                                            |     | 44.01070576 | 46.15830134 |        |
| 49.60766586                         | 57.1845658                                             |     | 68.54096445 |             |        |
| ENSG00000197713                     | 1278.442652                                            |     | 1129.02649  | 1138.157356 |        |
| 967.4088278                         | 860.8560045                                            |     | 836.9768381 | 1181.875499 |        |
| 888.4138901                         | 0.411510076                                            |     | 0.00860221  | 0.054732588 | RPE    |
| 2                                   | 210002565                                              |     | 210022259   | + 3522      |        |
| protein_coding                      | ribulose-5-phosphate-3-epimerase [Source:HGNC          |     |             |             |        |
| Symbol;Acc:HGNC:10293]              | -                                                      |     | 1105 1218   | 1164 963    | 942    |
| 853                                 | 17.15803855                                            |     | 15.24726311 | 15.30967899 |        |
| 13.22020385                         | 11.65521123                                            |     | 11.30591498 |             |        |
| ENSG00000154380                     | 1727.343782                                            |     | 1342.225252 | 1855.861394 |        |
| 1365.221804                         | 1081.096235                                            |     | 1158.815528 | 1641.810143 |        |
| 1201.711189                         | 0.45012519                                             |     | 0.008603546 | 0.054732588 | ENAH   |
| 1                                   | 225486835                                              |     | 225653142   | - 15044     |        |
| protein_coding                      | "ENAH, actin regulator [Source:HGNC                    |     |             |             |        |
| Symbol;Acc:HGNC:18271]"             | -                                                      |     | 1493 1448   | 1898 1359   | 1183   |
| 1181                                | 5.427392069                                            |     | 4.243646456 | 5.844338192 |        |
| 4.367745737                         | 3.426731033                                            |     | 3.664650894 |             |        |
| ENSG00000060688                     | 1812.958946                                            |     | 1511.857311 | 1714.080624 |        |
| 1389.331681                         | 1293.111727                                            |     | 1122.510554 | 1679.632293 |        |
| 1268.317987                         | 0.404924828                                            |     | 0.008615473 | 0.054763951 |        |
| SNRNP40 1                           | 31259568                                               |     | 31296782    | - 3881      |        |
| protein_coding                      | small nuclear ribonucleoprotein U5 subunit 40          |     |             |             |        |
| [Source:HGNC Symbol;Acc:HGNC:30857] | -                                                      |     |             | 1567 1631   | 1753   |
| 1383                                | 1415 1144                                              |     | 22.08106756 | 18.52867127 |        |
| 20.92380814                         | 17.22978086                                            |     | 15.88807916 | 13.76031632 |        |
| ENSG00000168701                     | 799.4605179                                            |     | 996.4724764 | 693.2590771 |        |
| 1188.416037                         | 1129.530808                                            |     | 1112.698399 | 829.7306905 |        |
| 1143.548415                         | -0.462337293                                           |     | 0.008615641 | 0.054763951 |        |
| TMEM208 16                          | 67227103                                               |     | 67229278    | + 1787      |        |
| protein_coding                      | transmembrane protein 208 [Source:HGNC                 |     |             |             |        |
| Symbol;Acc:HGNC:25015]              | -                                                      |     | 691 1075    | 709 1183    | 1236   |
| 1134                                | 21.14697285                                            |     | 26.52270835 | 18.37909567 |        |
| 32.00821154                         | 30.14064321                                            |     | 29.62337511 |             |        |
| ENSG00000183828                     | 27.76708022                                            |     | 42.63975248 | 61.60130022 |        |
| 137.6272164                         | 116.0602044                                            |     | 63.77900877 | 44.00271097 |        |
| 105.8221432                         | -1.261965068                                           |     | 0.008620368 | 0.054771222 | NUDT14 |
| 14                                  | 105172938                                              |     | 105181323   | - 1916      |        |
| protein_coding                      | nudix hydrolase 14 [Source:HGNC Symbol;Acc:HGNC:20141] |     |             |             |        |
| -                                   | 24 46                                                  |     | 63 137      | 127 65      |        |
| 0.685031354                         | 1.058513216                                            |     | 1.523166925 | 3.457214127 |        |
| 2.888463034                         | 1.583667075                                            |     |             |             |        |



|                                     |                                                       |             |                  |  |  |        |
|-------------------------------------|-------------------------------------------------------|-------------|------------------|--|--|--------|
| ENSG0000013374                      | 1026.225006                                           | 1111.414418 | 1024.73274       |  |  |        |
| 1248.69073                          | 1423.793689                                           | 1492.428805 | 1054.124055      |  |  |        |
| 1388.304408                         | -0.397159736                                          | 0.008643696 | 0.054896626      |  |  | NUB1   |
| 7                                   | 151341699                                             | 151378449   | + 5411           |  |  |        |
| protein_coding                      | negative regulator of ubiquitin like proteins 1       |             |                  |  |  |        |
| [Source:HGNC Symbol;Acc:HGNC:17623] | -                                                     |             | 887 1199         |  |  | 1048   |
| 1243                                | 1558 1521                                             | 8.964803995 | 9.769573557      |  |  |        |
| 8.971936776                         | 11.10694986                                           | 12.54724901 | 13.12192998      |  |  |        |
| ENSG00000187531                     | 601.6200714                                           | 799.0318834 | 846.7734284      |  |  |        |
| 1021.656052                         | 1082.923955                                           | 1005.745907 | 749.1417944      |  |  |        |
| 1036.775305                         | -0.467792189                                          | 0.008657051 | 0.054958614      |  |  | SIRT7  |
| 17                                  | 81911939                                              | 81921323    | - 6152           |  |  |        |
| protein_coding                      | sirtuin 7 [Source:HGNC Symbol;Acc:HGNC:14935]         |             |                  |  |  | -      |
| 520                                 | 862 866                                               | 1017 1185   | 1025 4.622551194 |  |  |        |
| 6.177672726                         | 6.52084716                                            | 7.992926928 | 8.393838738      |  |  |        |
| 7.77742745                          |                                                       |             |                  |  |  |        |
| ENSG0000090861                      | 7016.972563                                           | 7831.810189 | 7077.304936      |  |  |        |
| 11004.14984                         | 8094.970794                                           | 9164.552952 | 7308.695896      |  |  |        |
| 9421.22453                          | -0.366201308                                          | 0.008670011 | 0.055018043      |  |  | AARS   |
| 16                                  | 70252295                                              | 70289543    | - 4498           |  |  |        |
| protein_coding                      | alanyl-tRNA synthetase [Source:HGNC                   |             |                  |  |  |        |
| Symbol;Acc:HGNC:20]                 | -                                                     | 6065 8449   | 7238 10954       |  |  | 8858   |
| 9340                                | 73.7404981                                            | 82.81706152 | 74.54209312      |  |  |        |
| 117.748261                          | 85.81729526                                           | 96.9334033  |                  |  |  |        |
| ENSG00000109756                     | 795.9896329                                           | 943.6362614 | 1083.400645      |  |  |        |
| 768.5023398                         | 498.9674931                                           | 680.9635705 | 941.0088465      |  |  |        |
| 649.4778011                         | 0.535888684                                           | 0.008683717 | 0.055082151      |  |  |        |
| RAPGEF2 4                           | 159103013                                             | 159360174   | + 13275          |  |  |        |
| protein_coding                      | Rap guanine nucleotide exchange factor 2 [Source:HGNC |             |                  |  |  |        |
| Symbol;Acc:HGNC:16854]              | -                                                     | 688 1018    | 1108 765         |  |  | 546    |
| 694                                 | 2.834318302                                           | 3.381015846 | 3.866408051      |  |  |        |
| 2.786301584                         | 1.792324786                                           | 2.440455969 |                  |  |  |        |
| ENSG00000266094                     | 573.8529912                                           | 429.1783782 | 578.8566624      |  |  |        |
| 398.8175541                         | 357.3192121                                           | 308.1016731 | 527.2960106      |  |  |        |
| 354.7461464                         | 0.571236985                                           | 0.008695223 | 0.055132255      |  |  | RASSF5 |
| 1                                   | 206507530                                             | 206589448   | + 6976           |  |  |        |
| protein_coding                      | Ras association domain family member 5 [Source:HGNC   |             |                  |  |  |        |
| Symbol;Acc:HGNC:17609]              | -                                                     | 496 463     | 592 397          |  |  | 391    |
| 314                                 | 3.888390893                                           | 2.926230126 | 3.931132577      |  |  |        |
| 2.751599687                         | 2.442468004                                           | 2.101208805 |                  |  |  |        |
| ENSG00000185432                     | 42.807582                                             | 26.88158308 | 83.11286537      |  |  |        |
| 20.09156444                         | 2.741579632                                           | 14.71823279 | 50.93401015      |  |  |        |
| 12.51712562                         | 2.030442154                                           | 0.008711643 | 0.055213467      |  |  |        |
| METTL7A 12                          | 50923472                                              | 50932517    | + 4083           |  |  |        |
| protein_coding                      | methyltransferase like 7A [Source:HGNC                |             |                  |  |  |        |
| Symbol;Acc:HGNC:24550]              | -                                                     | 37 29       | 85 20            |  |  | 3      |
| 15                                  | 0.495583749                                           | 0.313150115 | 0.964366247      |  |  |        |
| 0.236838244                         | 0.032018462                                           | 0.171497548 |                  |  |  |        |
| ENSG00000111554                     | 301.9669974                                           | 361.5109449 | 407.7419395      |  |  |        |
| 286.3047933                         | 207.4461922                                           | 155.0320521 | 357.0732939      |  |  |        |

|                                                     |                                                        |             |                |                |
|-----------------------------------------------------|--------------------------------------------------------|-------------|----------------|----------------|
| 216.2610125                                         | 0.724554732                                            | 0.008744489 | 0.055398676    | MDM1           |
| 12                                                  | 68272443                                               | 68332381    | - 6549         |                |
| protein_coding                                      | Mdm1 nuclear protein [Source:HGNC                      |             |                |                |
| Symbol;Acc:HGNC:29917]                              | -                                                      | 261 390     | 417 285        | 227            |
| 158                                                 | 2.179516844                                            | 2.625569837 | 2.949602688    |                |
| 2.104122818                                         | 1.51046082                                             | 1.126232699 |                |                |
| ENSG00000179409                                     | 1962.207002                                            | 2381.337481 | 2334.982618    |                |
| 2950.446238                                         | 2665.729262                                            | 2979.951533 | 2226.1757      |                |
| 2865.375678                                         | -0.36370818                                            | 0.008766462 | 0.055514877    | GEMIN4         |
| 17                                                  | 744414 753999                                          | - 5751      | protein_coding | gem            |
| nuclear organelle associated protein 4 [Source:HGNC |                                                        |             |                |                |
| Symbol;Acc:HGNC:15717]                              | -                                                      | 1696 2569   | 2388 2937      | 2917           |
| 3037                                                | 16.12787665                                            | 19.69494148 | 19.23505403    |                |
| 24.69231425                                         | 22.10302217                                            | 24.65173328 |                |                |
| ENSG00000119801                                     | 809.873173                                             | 710.971525  | 585.7012513    |                |
| 783.5710132                                         | 1172.482223                                            | 1076.393425 | 702.1819831    |                |
| 1010.815554                                         | -0.526491426                                           | 0.008775886 | 0.055532171    | YPEL5          |
| 2                                                   | 30146941                                               | 30160533    | + 3421         |                |
| protein_coding                                      | yippee like 5 [Source:HGNC                             |             |                |                |
| Symbol;Acc:HGNC:18329]                              | -                                                      | 599 780     | 1283 1097      |                |
| 11.19024715                                         | 9.884990306                                            | 8.111033666 | 11.02408987    |                |
| 16.34301502                                         | 14.96923441                                            |             |                |                |
| ENSG00000114626                                     | 400.3087398                                            | 548.7550754 | 470.3210382    |                |
| 663.0216265                                         | 624.1662963                                            | 741.7989327 | 473.1282845    |                |
| 676.3289518                                         | -0.514084685                                           | 0.008776459 | 0.055532171    | ABTB1          |
| 3                                                   | 127672935                                              | 127680920   | + 6149         |                |
| protein_coding                                      | ankyrin repeat and BTB domain containing 1             |             |                |                |
| [Source:HGNC                                        |                                                        |             |                |                |
| Symbol;Acc:HGNC:18275]                              | -                                                      | 346 592     |                | 481            |
| 660                                                 | 683 756                                                | 3.07727507  | 4.24474076     |                |
| 3.623623263                                         | 5.189680947                                            | 4.840328181 | 5.739358304    |                |
| ENSG00000041802                                     | 2311.609428                                            | 2423.977233 | 2263.603333    |                |
| 3070.995625                                         | 2873.175455                                            | 2851.4123   | 2333.063332    |                |
| 2931.861126                                         | -0.329490438                                           | 0.008782902 | 0.055549947    | LSG1           |
| 3                                                   | 194640788                                              | 194672477   | - 4818         |                |
| protein_coding                                      | large 60S subunit nuclear export GTPase 1 [Source:HGNC |             |                |                |
| Symbol;Acc:HGNC:25652]                              | -                                                      | 1998 2615   | 2315 3057      | 3144           |
| 2906                                                | 22.67897389                                            | 23.92978824 | 22.25802652    |                |
| 30.67819895                                         | 28.43638198                                            | 28.15625243 |                |                |
| ENSG00000172238                                     | 0 0                                                    | 3.911193665 | 22.10072088    |                |
| 9.138598774                                         | 22.56795695                                            | 1.303731222 |                |                |
| 17.93575887                                         | -3.757991952                                           | 0.008783641 | 1              | ATOH1 4        |
| 93828753                                            | 93830964                                               | +           | 2212           | protein_coding |
| atonal bHLH transcription factor 1 [Source:HGNC     |                                                        |             |                |                |
| Symbol;Acc:HGNC:797]                                | bHLH                                                   | 0 0         | 4 22           | 10             |
| 23                                                  | 0 0                                                    | 0.083767841 | 0.480882281    |                |
| 0.197003288                                         | 0.48538768                                             |             |                |                |
| ENSG00000178691                                     | 3159.662336                                            | 2914.334387 | 2925.572861    |                |
| 2399.937372                                         | 2543.272039                                            | 2098.819996 | 2999.856528    |                |
| 2347.343136                                         | 0.353650797                                            | 0.008791566 | 0.055581746    | SUZ12          |
| 17                                                  | 31937018                                               | 32001045    | + 6547         |                |

|                                                                          |                                                                                    |                |                          |                       |            |
|--------------------------------------------------------------------------|------------------------------------------------------------------------------------|----------------|--------------------------|-----------------------|------------|
| protein_coding                                                           | "SUZ12, polycomb repressive complex 2 subunit [Source:HGNC Symbol;Acc:HGNC:17101]" | -              | 2731                     | 3144                  | 2992       |
| 2389                                                                     | 2783                                                                               | 2139           | 22.81256252              | 21.17259813           |            |
| 21.17004124                                                              | 17.64310527                                                                        |                | 18.52377355              | 15.25156744           |            |
| ENSG00000149428                                                          | 2841.497876                                                                        |                | 2442.516256              | 4441.160406           |            |
| 2399.937372                                                              | 1597.427066                                                                        |                | 2567.841014              | 3241.724846           |            |
| 2188.401818                                                              | 0.567058593                                                                        |                | 0.008802057              | 0.05562507            | HYOU1      |
| 11                                                                       | 119044189                                                                          |                | 119057202                | -                     | 7694       |
| protein_coding                                                           | hypoxia up-regulated 1 [Source:HGNC Symbol;Acc:HGNC:16931]                         | -              | 2456                     | 2635                  | 1748       |
| 2617                                                                     | 17.4570515                                                                         |                | 15.09949406              | 27.34622632           |            |
| 15.01292048                                                              | 9.900288356                                                                        |                | 15.87806504              |                       |            |
| ENSG00000158352                                                          | 16.19746346                                                                        |                | 4.634755704              | 4.888992081           | 0          |
| 0                                                                        | 0                                                                                  | 8.573737082    | 0                        | 5.588444939           |            |
| 0.008802807                                                              | 1                                                                                  | SHROOM4 X      | 50591647                 | 50814302              |            |
| -                                                                        | 10333                                                                              | protein_coding | shroom family member 4   |                       |            |
| [Source:HGNC Symbol;Acc:HGNC:29215]                                      | -                                                                                  | 14             | 5                        | 5                     |            |
| 0                                                                        | 0                                                                                  | 0              | 0.074096265              | 0.021334258           |            |
| 0.022415376                                                              | 0                                                                                  | 0              | 0                        |                       |            |
| ENSG00000230309                                                          | 13.88354011                                                                        |                | 5.561706845              | 5.866790497           | 0          |
| 0                                                                        | 0                                                                                  | 8.437345817    | 0                        | 5.566421111           |            |
| 0.008808061                                                              | 1                                                                                  | AL121718.1     | 6                        | 78604467              |            |
| 78606036                                                                 | -                                                                                  | 387            | lincRNA novel transcript | -                     |            |
| 12                                                                       | 6                                                                                  | 6              | 0                        | 0                     | 1.69576237 |
| 0.683556226                                                              |                                                                                    | 0.718195602    | 0                        | 0                     | 0          |
| ENSG00000160172                                                          | 129.5797077                                                                        |                | 152.9469382              | 112.4468179           |            |
| 240.0941951                                                              | 296.0906003                                                                        |                | 163.8629918              | 131.6578213           |            |
| 233.3492624                                                              | -0.825659818                                                                       |                | 0.008816054              | 0.055690506           |            |
| FAM86C2P                                                                 | 11                                                                                 | 67791648       | 67805336                 | -                     | 3402       |
| transcribed_unprocessed_pseudogene                                       |                                                                                    |                |                          | "family with sequence |            |
| similarity 86 member C2, pseudogene [Source:HGNC Symbol;Acc:HGNC:42392]" | -                                                                                  | 112            | 165                      | 115                   | 239        |
| 167                                                                      | 1.800439059                                                                        |                | 2.138373644              | 1.565907077           | 324        |
| 3.396759574                                                              | 4.150202605                                                                        |                | 2.291543985              |                       |            |
| ENSG00000125166                                                          | 4433.477141                                                                        |                | 3876.509671              | 4021.684886           |            |
| 3419.584268                                                              | 3298.120298                                                                        |                | 3084.941593              | 4110.557233           |            |
| 3267.54872                                                               | 0.330958251                                                                        |                | 0.008821636              | 0.055702747           | GOT2       |
| 16                                                                       | 58707131                                                                           |                | 58734357                 | -                     | 3766       |
| protein_coding                                                           | glutamic-oxaloacetic transaminase 2 [Source:HGNC Symbol;Acc:HGNC:4433]             | -              | 3832                     | 4182                  | 3609       |
| 3144                                                                     | 55.64676187                                                                        |                | 48.95957856              | 50.59188367           |            |
| 43.7029197                                                               | 41.76044945                                                                        |                | 38.9716019               |                       |            |
| ENSG00000252657                                                          | 15.04050178                                                                        |                | 5.561706845              | 4.888992081           | 0          |
| 0                                                                        | 0                                                                                  | 8.497066903    | 0                        | 5.576087734           |            |
| 0.008827696                                                              | 1                                                                                  | RF00156        | 17                       | 29777619              | 29777744   |
| +                                                                        | 126                                                                                | snoRNA         | -                        | 13                    | 6          |
| 0                                                                        | 0                                                                                  | 0              | 5.64244741               | 2.099494123           | 5          |
| 1.838238743                                                              | 0                                                                                  | 0              | 0                        |                       |            |
| ENSG00000232774                                                          | 3.470885027                                                                        |                | 9.269511408              | 12.71137941           | 0          |
| 0                                                                        | 0                                                                                  | 8.483925282    | 0                        | 5.580305571           |            |

|                                                      |                                                      |                                   |                         |              |         |
|------------------------------------------------------|------------------------------------------------------|-----------------------------------|-------------------------|--------------|---------|
| 0.008829428                                          | 1                                                    | FLJ22447                          | 14                      | 61570540     |         |
| 61658696                                             | +                                                    | 2653                              | lincRNA uncharacterized | LOC400221    |         |
| [Source:NCBI gene;Acc:400221]                        | -                                                    |                                   | 3                       | 10           | 13 0    |
| 0                                                    | 0                                                    | 0.061841315                       | 0.16618687              | 0.226990958  |         |
| 0                                                    | 0                                                    | 0                                 |                         |              |         |
| ENSG00000227440                                      | 3.470885027                                          | 9.269511408                       | 12.71137941             | 0            |         |
| 0                                                    | 0                                                    | 8.483925282                       | 0                       | 5.580305571  |         |
| 0.008829428                                          | 1                                                    | ATP5MC1P4                         | 3                       | 172828736    |         |
| 172829176                                            | -                                                    | 441                               | processed_pseudogene    | ATP synthase |         |
| membrane subunit c locus 1 pseudogene 4 [Source:HGNC |                                                      |                                   |                         |              |         |
| Symbol;Acc:HGNC:39507]                               | -                                                    | 3                                 | 10                      | 13           | 0 0     |
| 0                                                    | 0.3720295                                            | 0.999759106                       | 1.36554878              | 0            |         |
| 0                                                    | 0                                                    |                                   |                         |              |         |
| ENSG00000171155                                      | 600.4631097                                          | 640.5232383                       | 572.0120735             |              |         |
| 373.7030986                                          | 428.6002825                                          | 475.8895269                       | 604.3328072             |              |         |
| 426.0643027                                          | 0.504262462                                          | 0.008855661                       | 0.055874461             |              |         |
| C1GALT1C1                                            | X                                                    | 120625793                         | 120630150               | -            | 1785    |
| protein_coding                                       | C1GALT1                                              | specific chaperone 1 [Source:HGNC |                         |              |         |
| Symbol;Acc:HGNC:24338]                               | -                                                    | 519                               | 691                     | 585          | 372 469 |
| 485                                                  | 15.90097849                                          | 17.06765222                       | 15.18168938             |              |         |
| 10.07641245                                          | 11.4496766                                           | 12.68380492                       |                         |              |         |
| ENSG00000105875                                      | 277.6708022                                          | 460.694717                        | 447.8316746             |              |         |
| 331.5108133                                          | 158.0977588                                          | 188.3933797                       | 395.3990646             |              |         |
| 226.0006506                                          | 0.80903474                                           | 0.008856141                       | 0.055874461             |              | WDR91   |
| 7                                                    | 135183839                                            | 135211534                         | -                       | 6032         |         |
| protein_coding                                       | WD repeat domain 91 [Source:HGNC                     |                                   |                         |              |         |
| Symbol;Acc:HGNC:24997]                               | -                                                    | 240                               | 497                     | 458          | 330 173 |
| 192                                                  | 2.175928505                                          | 3.63269565                        | 3.517277233             |              |         |
| 2.645171431                                          | 1.249808195                                          | 1.485887508                       |                         |              |         |
| ENSG00000198324                                      | 146.9341328                                          | 263.254124                        | 283.5615407             |              |         |
| 365.6664728                                          | 352.7499127                                          | 426.828751                        | 231.2499325             |              |         |
| 381.7483788                                          | -0.72038482                                          | 0.008862967                       | 0.055892769             |              | PHETA1  |
| 12                                                   | 111360651                                            | 111369121                         | -                       | 3361         |         |
| protein_coding                                       | PH domain containing endocytic trafficking adaptor 1 |                                   |                         |              |         |
| [Source:HGNC Symbol;Acc:HGNC:26509]                  | -                                                    |                                   | 127                     | 284          | 290     |
| 364                                                  | 386                                                  | 435                               | 2.066473885             | 3.72549329   |         |
| 3.996979688                                          | 5.236415355                                          | 5.004692401                       | 6.041806058             |              |         |
| ENSG00000206503                                      | 2149.634793                                          | 2996.833038                       | 3017.485912             |              |         |
| 1395.35915                                           | 2244.439859                                          | 2115.50066                        | 2721.317915             |              |         |
| 1918.433223                                          | 0.504493055                                          | 0.008866355                       | 0.055892769             |              | HLA-A   |
| 6                                                    | 29941260                                             | 29945884                          | +                       | 2710         |         |
| protein_coding                                       | "major histocompatibility complex, class I, A        |                                   |                         |              |         |
| [Source:HGNC Symbol;Acc:HGNC:4931]"                  | -                                                    |                                   | 1858                    | 3233         | 3086    |
| 1389                                                 | 2456                                                 | 2156                              | 37.49480778             | 52.59813818  |         |
| 52.75080441                                          | 24.78187553                                          | 39.49277667                       | 37.13859771             |              |         |
| ENSG00000272872                                      | 28.92404189                                          | 38.00499677                       | 32.26734773             |              |         |
| 103.4715569                                          | 40.20983461                                          | 114.8022158                       | 33.06546213             |              |         |
| 86.16120242                                          | -1.378451926                                         | 0.008885259                       | 0.055988851             |              |         |
| AP000525.1                                           | 22                                                   | 15823197                          | 15823890                | +            | 694     |
| sense_intronic                                       | "novel transcript, sense intronic to novel           |                                   |                         |              |         |

|                                     |                                                 |             |             |            |                |             |        |
|-------------------------------------|-------------------------------------------------|-------------|-------------|------------|----------------|-------------|--------|
| transcript"                         | -                                               | 25          | 41          | 33         | 103            | 44          | 117    |
| 1.970040938                         |                                                 | 2.604703804 |             | 2.20270798 |                | 7.175942841 |        |
| 2.762814991                         |                                                 | 7.869958226 |             |            |                |             |        |
| ENSG00000185728                     | 3647.900164                                     |             | 3148.853025 |            | 3008.685727    |             |        |
| 4282.51696                          | 4606.767642                                     |             | 3741.374776 |            | 3268.479639    |             |        |
| 4210.219793                         | -0.365560261                                    |             | 0.008893975 |            | 0.056020683    |             | YTHDF3 |
| 8                                   | 63168553                                        |             | 63212786    |            | + 6163         |             |        |
| protein_coding                      | YTH N6-methyladenosine RNA binding protein 3    |             |             |            |                |             |        |
| [Source:HGNC Symbol;Acc:HGNC:26465] |                                                 |             | -           |            | 3153           | 3397        | 3077   |
| 4263                                | 5041                                            | 3813        | 27.97863456 |            | 24.30173815    |             |        |
| 23.12798432                         | 33.44447488                                     |             | 35.64372854 |            | 28.88156173    |             |        |
| ENSG00000120256                     | 143.4632478                                     |             | 71.37523785 |            | 91.91305112    |             |        |
| 24.10987733                         | 54.83159264                                     |             | 48.07956045 |            | 102.2505123    |             |        |
| 42.34034348                         | 1.267542029                                     |             | 0.008912937 |            | 0.056111523    |             | LRP11  |
| 6                                   | 149818798                                       |             | 149864026   |            | - 5652         |             |        |
| protein_coding                      | LDL receptor related protein 11 [Source:HGNC    |             |             |            |                |             |        |
| Symbol;Acc:HGNC:16936]              |                                                 |             | -           |            | 124            | 77          | 60     |
| 49                                  | 1.199814883                                     |             | 0.60065145  |            | 0.770421078    |             |        |
| 0.205310096                         | 0.462602201                                     |             | 0.404706298 |            |                |             |        |
| ENSG00000047644                     | 1094.485745                                     |             | 983.4951604 |            | 1194.869665    |             |        |
| 879.0059443                         | 812.421431                                      |             | 734.9304241 |            | 1090.95019     |             |        |
| 808.7859331                         | 0.431679977                                     |             | 0.008915738 |            | 0.056111523    |             | WWC3   |
| X                                   | 10015562                                        |             | 10144478    |            | + 7114         |             |        |
| protein_coding                      | WWC family member 3 [Source:HGNC                |             |             |            |                |             |        |
| Symbol;Acc:HGNC:29237]              |                                                 |             | -           |            | 946            | 1061        | 889    |
| 749                                 | 7.272303383                                     |             | 6.575601427 |            | 7.957191332    |             |        |
| 5.946965358                         | 5.445609533                                     |             | 4.914892154 |            |                |             |        |
| ENSG00000177700                     | 367.9138129                                     |             | 799.9588346 |            | 756.8159741    |             |        |
| 297.3551537                         | 332.6449954                                     |             | 511.2132856 |            | 641.5628738    |             |        |
| 380.4044782                         | 0.755241509                                     |             | 0.008929467 |            | 0.05617317     |             | POLR2L |
| 11                                  | 837356                                          | 842545      | -           | 1142       | protein_coding |             | RNA    |
| polymerase II subunit L             | [Source:HGNC Symbol;Acc:HGNC:9199]              |             |             |            |                |             |        |
| 318                                 | 863                                             | 774         | 296         | 364        | 521            | 15.22845095 |        |
| 33.31797897                         | 31.39621631                                     |             | 12.53218576 |            | 13.88973236    |             |        |
| 21.29696196                         |                                                 |             |             |            |                |             |        |
| ENSG00000233184                     | 409.5644332                                     |             | 269.742782  |            | 203.3820706    |             |        |
| 167.7645631                         | 152.6145995                                     |             | 189.3745953 |            | 294.2297619    |             |        |
| 169.9179193                         | 0.790508447                                     |             | 0.008932883 |            | 0.05617317     |             |        |
| AC093157.1                          | 1                                               | 101025878   |             | 101087268  |                | + 2840      |        |
| antisense                           | uncharacterized LOC102606465 [Source:NCBI       |             |             |            |                |             |        |
| gene;Acc:102606465]                 |                                                 |             | -           |            | 354            | 291         | 167    |
| 193                                 | 6.816785597                                     |             | 4.517608656 |            | 3.392715561    |             |        |
| 2.843147215                         | 2.562457841                                     |             | 3.17237855  |            |                |             |        |
| ENSG00000120306                     | 554.1846427                                     |             | 424.5436225 |            | 378.4079871    |             |        |
| 625.8522323                         | 725.6047427                                     |             | 618.1657773 |            | 452.3787507    |             |        |
| 656.5409174                         | -0.539034677                                    |             | 0.008939807 |            | 0.056193596    |             | CYSTM1 |
| 5                                   | 140174642                                       |             | 140282052   |            | + 2371         |             |        |
| protein_coding                      | cysteine rich transmembrane module containing 1 |             |             |            |                |             |        |
| [Source:HGNC Symbol;Acc:HGNC:30239] |                                                 |             | -           |            | 479            | 458         | 387    |
| 623                                 | 794                                             | 630         | 11.04838176 |            | 8.516632       |             |        |

|                    |                                          |                                     |                     |            |
|--------------------|------------------------------------------|-------------------------------------|---------------------|------------|
| 7.561045767        | 12.70450385                              | 14.59309959                         | 12.40380789         |            |
| ENSG00000102900    | 2990.745932                              | 2911.553533                         | 3024.330501         |            |
| 2721.402403        | 2070.806482                              | 2001.67966                          | 2975.543322         |            |
| 2264.629515        | 0.393993598                              | 0.008944055                         | 0.05619719          | NUP93      |
| 16                 | 56730105                                 | 56850286                            | + 11136             |            |
| protein_coding     | nucleoporin 93                           | [Source:HGNC Symbol;Acc:HGNC:28958] |                     |            |
| -                  | 2585 3141                                | 3093 2709                           | 2266 2040           |            |
| 12.69480511        | 12.43576974                              | 12.8662846                          | 11.76199524         |            |
| 8.867256698        | 8.551592171                              |                                     |                     |            |
| ENSG00000063245    | 3800.619105                              | 5423.591125                         | 6128.840473         |            |
| 7331.411864        | 6073.512745                              | 7491.580491                         | 5117.683567         |            |
| 6965.5017          | -0.4444827                               | 0.008950749                         | 0.056216146         | EPN1       |
| 19                 | 55675226                                 | 55709858                            | + 17616             |            |
| protein_coding     | epsin 1                                  | [Source:HGNC Symbol;Acc:HGNC:21604] |                     |            |
| 3285               | 5851 6268                                | 7298 6646                           | 7635 10.19818263    | -          |
| 14.6439            | 16.48254014                              | 20.03077598                         | 16.44037173         |            |
| 20.23241738        |                                          |                                     |                     |            |
| ENSG00000198948    | 168.9164047                              | 141.8235245                         | 108.5356242         |            |
| 253.1537119        | 243.0867274                              | 211.9425522                         | 139.7585178         |            |
| 236.0609972        | -0.758240261                             | 0.008957747                         | 0.056236995         | MFAP3L     |
| 4                  | 169986597                                | 170033031                           | - 8741              |            |
| protein_coding     | microfibril associated protein 3 like    | [Source:HGNC Symbol;Acc:HGNC:29083] |                     |            |
| 216                | 0.913453509                              | 0.771728019                         | 0.588253222         | 266        |
| 1.393928947        | 1.326108669                              | 1.153555958                         |                     |            |
| ENSG00000110917    | 4425.37841                               | 4068.388557                         | 5294.778424         |            |
| 3552.188593        | 3691.993905                              | 3516.676422                         | 4596.181797         |            |
| 3586.952973        | 0.357661283                              | 0.008969841                         | 0.056289804         | MLEC       |
| 12                 | 120686869                                | 120701864                           | + 6723              |            |
| protein_coding     | malectin                                 | [Source:HGNC Symbol;Acc:HGNC:28973] |                     |            |
| 3825               | 4389 5415                                | 3536 4040                           | 3584 31.11451537    | -          |
| 28.78302451        | 37.31107873                              | 25.4302343                          | 26.18646356         |            |
| 24.88576098        |                                          |                                     |                     |            |
| ENSG00000259354    | 45.12150535                              | 27.80853423                         | 31.28954932         |            |
| 6.027469332        | 4.569299387                              | 13.73701727                         | 34.73986297         |            |
| 8.111261997        | 2.099265443                              | 0.008974773                         | 0.056297645         |            |
| AC025580.2         | 15 45448427                              | 45513767                            | + 3886              |            |
| antisense          | "novel transcript, antisense to SLC30A4" |                                     |                     |            |
| -                  | 39 30                                    | 32 6                                | 5 14                |            |
| 0.548853608        | 0.340370895                              | 0.381460556                         | 0.074653414         |            |
| 0.056069387        | 0.16817881                               |                                     |                     |            |
| ENSG00000172006    | 93.71389573                              | 86.2064561                          | 62.57909863         |            |
| 153.700468         | 156.270039                               | 142.2762503                         | 80.83315016         |            |
| 150.7489191        | -0.900866851                             | 0.008981826                         | 0.056318776         | ZNF554     |
| 19                 | 2819874 2835773                          | + 4685                              | protein_coding zinc |            |
| finger protein 554 | [Source:HGNC Symbol;Acc:HGNC:26629]      |                                     |                     | zf-C2H2 81 |
| 93                 | 64 153                                   | 171 145                             | 0.94551873          |            |
| 0.875200005        | 0.632809273                              | 1.579003352                         | 1.590541895         |            |
| 1.444789055        |                                          |                                     |                     |            |
| ENSG00000100139    | 1240.262916                              | 1833.509357                         | 1945.818848         |            |

|                 |                                                                                     |                |                       |        |
|-----------------|-------------------------------------------------------------------------------------|----------------|-----------------------|--------|
| 2472.267004     | 2101.877718                                                                         | 2340.199014    | 1673.19704            |        |
| 2304.781245     | -0.461301536                                                                        | 0.009031682    | 0.056608171           |        |
| MICALL1 22      | 37905657                                                                            | 37942822       | + 5968                |        |
| protein_coding  | MICAL like 1 [Source:HGNC Symbol;Acc:HGNC:29804]                                    |                |                       |        |
| -               | 1072 1978                                                                           | 1990 2461      | 2300 2385             |        |
| 9.823374104     | 14.61273238                                                                         | 15.4463801     | 19.93811129           |        |
| 16.7941342      | 18.65544465                                                                         |                |                       |        |
| ENSG00000162878 | 31.23796524                                                                         | 48.20145932    | 128.0915925           |        |
| 28.12819022     | 12.79403828                                                                         | 23.54917247    | 69.1770057            |        |
| 21.49046699     | 1.691021255                                                                         | 0.009051343    | 0.056686043           | PKDCC  |
| 2               | 42048020                                                                            | 42058528       | + 3925                |        |
| protein_coding  | "protein kinase domain containing, cytoplasmic [Source:HGNC Symbol;Acc:HGNC:25123]" |                |                       |        |
| -               |                                                                                     |                | 27 52                 | 131    |
| 28              | 14 24                                                                               | 0.376200021    | 0.584114034           |        |
| 1.546087576     | 0.34492096                                                                          | 0.15543434     | 0.28544183            |        |
| ENSG00000111961 | 1043.579431                                                                         | 834.2560268    | 997.3543845           |        |
| 789.5984825     | 524.5555696                                                                         | 704.512743     | 958.3966142           |        |
| 672.8889317     | 0.510329415                                                                         | 0.009051523    | 0.056686043           | SASH1  |
| 6               | 148272304                                                                           | 148552050      | + 11143               |        |
| protein_coding  | SAM and SH3 domain containing 1 [Source:HGNC Symbol;Acc:HGNC:19182]                 |                |                       |        |
| -               |                                                                                     | 902 900        | 1020 786              | 574    |
| 718             | 4.426893966                                                                         | 3.561019377    | 4.240338207           |        |
| 3.410528099     | 2.244751961                                                                         | 3.007934324    |                       |        |
| ENSG00000151233 | 753.1820509                                                                         | 653.5005543    | 772.4607488           |        |
| 586.6736817     | 515.4169709                                                                         | 446.4530614    | 726.381118            |        |
| 516.181238      | 0.492661745                                                                         | 0.009056602    | 0.056694627           | GXYLT1 |
| 12              | 42081845                                                                            | 42144879       | - 7497                |        |
| protein_coding  | glucoside xylosyltransferase 1 [Source:HGNC Symbol;Acc:HGNC:27482]                  |                |                       |        |
| -               |                                                                                     | 651 705        | 790 584               | 564    |
| 455             | 4.748847141                                                                         | 4.146059822    | 4.881373468           |        |
| 3.766400968     | 3.278311302                                                                         | 2.833152303    |                       |        |
| ENSG00000073417 | 1293.483153                                                                         | 1313.489767    | 1522.432134           |        |
| 1128.141343     | 1050.938859                                                                         | 924.3050193    | 1376.468351           |        |
| 1034.461741     | 0.41228194                                                                          | 0.009079508    | 0.05681475            | PDE8A  |
| 15              | 84980440                                                                            | 85139145       | + 7886                |        |
| protein_coding  | phosphodiesterase 8A [Source:HGNC Symbol;Acc:HGNC:8793]                             |                |                       |        |
| -               |                                                                                     | 1118 1417      | 1557 1123             | 1150   |
| 942             | 7.7531778                                                                           | 7.922222497    | 9.146065255           |        |
| 6.885321123     | 6.354767494                                                                         | 5.576223417    |                       |        |
| ENSG00000279145 | 35.86581195                                                                         | 26.88158308    | 33.24514615           |        |
| 95.43493109     | 63.05633154                                                                         | 72.60994844    | 31.99751373           |        |
| 77.03373702     | -1.269315101                                                                        | 0.009095538    | 0.056891769           |        |
| AC011912.1      | 15 55171378                                                                         | 55176739       | -                     | 5362   |
| lincRNA         | TEC                                                                                 |                |                       |        |
| -               |                                                                                     | 31 29          | 34 95                 | 69     |
| 74              | 0.316176507                                                                         | 0.238454293    | 0.293734232           |        |
| 0.856639335     | 0.560764973                                                                         | 0.644244836    |                       |        |
| ENSG00000227165 | 5.784808379                                                                         | 10.19646255    | 8.800185745           | 0      |
| 0               | 0                                                                                   | 8.260485558 0  | 5.540774389           |        |
| 0.009125402     | 1                                                                                   | WDR11-AS1 10   | 120761812             |        |
| 120851345       | -                                                                                   | 4685 antisense | WDR11 antisense RNA 1 |        |

|                                     |                                                     |              |              |               |
|-------------------------------------|-----------------------------------------------------|--------------|--------------|---------------|
| [Source:HGNC Symbol;Acc:HGNC:27437] | -                                                   | 5            | 11           | 9             |
| 0                                   | 0                                                   | 0            | 0.058365354  | 0.10351828    |
| 0.088988804                         | 0                                                   | 0            | 0            |               |
| ENSG00000095383                     | 145.7771711                                         | 268.8158308  | 178.9371102  |               |
| 311.4192488                         | 281.4688422                                         | 412.1105182  | 197.8433707  |               |
| 334.9995364                         | -0.757026836                                        | 0.009148018  | 0.057196629  | TBC1D2        |
| 9                                   | 98198999                                            | 98255721     | -            | 3681          |
| protein_coding                      | TBC1 domain family member 2                         | [Source:HGNC |              |               |
| Symbol;Acc:HGNC:18026]              | -                                                   | 126          | 290          | 183           |
| 420                                 | 1.871972396                                         | 3.473490684  | 2.30296707   | 308           |
| 4.071899897                         | 3.646225272                                         | 5.326347643  |              |               |
| ENSG00000102226                     | 2672.581471                                         | 2948.631579  | 2837.571004  |               |
| 3547.165702                         | 3313.655916                                         | 3792.397983  | 2819.594685  |               |
| 3551.0732                           | -0.33254684                                         | 0.009164928  | 0.057278925  | USP11         |
| X                                   | 47232690                                            | 47248328     | +            | 5269          |
| protein_coding                      | ubiquitin specific peptidase 11                     | [Source:HGNC |              |               |
| Symbol;Acc:HGNC:12609]              | -                                                   | 2310         | 3181         | 2902          |
| 3865                                | 23.97609739                                         | 26.61763274  | 25.51359547  | 3626          |
| 32.40191926                         | 29.98873862                                         | 34.24264753  |              |               |
| ENSG00000275963                     | 0                                                   | 0.926951141  | 0.977798416  | 21.09614266   |
| 7.310879019                         | 10.79337071                                         | 0.634916519  | 13.06679747  |               |
| -4.310239479                        | 0.009168067                                         | 1            | AC008115.4   | 12            |
| 12648939                            | 12649713                                            | +            | 775          | lincRNA novel |
| transcript                          | -                                                   | 0            | 1            | 1             |
| 0                                   | 0.056889518                                         | 0.059772408  | 1.310143326  | 11            |
| 0.449828411                         | 0.66257801                                          |              |              |               |
| ENSG00000129315                     | 2199.384146                                         | 1721.348269  | 1588.922426  |               |
| 2824.87396                          | 2319.376369                                         | 2263.664203  | 1836.551613  |               |
| 2469.304844                         | -0.427548113                                        | 0.009176962  | 0.057330697  | CCNT1         |
| 12                                  | 48688458                                            | 48716998     | -            | 7381          |
| protein_coding                      | cyclin T1                                           | [Source:HGNC |              |               |
| Symbol;Acc:HGNC:1599]               | -                                                   | 1901         | 1857         | 1625          |
| 1901                                | 1857                                                | 1625         | 2812         | 2538          |
| 11.09253113                         | 10.19860134                                         | 18.42049632  | 2307         | 14.0851548    |
| 14.59077717                         |                                                     |              | 14.98425     |               |
| ENSG00000130741                     | 4604.707469                                         | 4423.410844  | 4507.650699  |               |
| 3879.681093                         | 3488.203152                                         | 3510.789129  | 4511.923004  |               |
| 3626.224458                         | 0.315279435                                         | 0.009182683  | 0.057343002  | EIF2S3        |
| X                                   | 24054716                                            | 24077971     | +            | 3472          |
| protein_coding                      | eukaryotic translation initiation factor 2 subunit  | gamma        | [Source:HGNC |               |
| Symbol;Acc:HGNC:3267]               | -                                                   | 4610         | 3862         | 3817          |
| 4610                                | 3862                                                | 3817         | 3578         | 62.68997091   |
| 61.50687535                         | 53.78160633                                         | 47.90722785  | 48.10682065  |               |
| ENSG00000122707                     | 321.6353458                                         | 144.604378   | 277.6947502  |               |
| 123.5631213                         | 73.10879019                                         | 177.600009   | 247.978158   |               |
| 124.7573068                         | 0.990688159                                         | 0.009207432  | 0.057474074  | RECK          |
| 9                                   | 36036433                                            | 36124451     | +            | 6045          |
| protein_coding                      | reversion inducing cysteine rich protein with kazal | motifs       | [Source:HGNC |               |
| Symbol;Acc:HGNC:11345]              | -                                                   | 284          | 123          | 80            |
| 284                                 | 123                                                 | 80           | 181          | 2.515030195   |
| 2.176328707                         | 0.983807259                                         | 0.576703092  | 1.137790363  |               |
|                                     |                                                     |              | 1.397746153  |               |



|                                                  |                                                       |             |             |             |
|--------------------------------------------------|-------------------------------------------------------|-------------|-------------|-------------|
| ENSG00000115073                                  | 944.0807274                                           | 1062.286007 | 885.885365  |             |
| 1215.539649                                      | 1201.725739                                           | 1457.105046 | 964.0840333 |             |
| 1291.456811                                      | -0.421469151                                          | 0.009214707 | 0.057494289 | ACTR1B      |
| 2                                                | 97655963                                              | 97664107    | - 2892      |             |
| protein_coding                                   | ARP1 actin related protein 1 homolog B [Source:HGNC   |             |             |             |
| Symbol;Acc:HGNC:168]                             | -                                                     | 816 1146    | 906 1210    | 1315        |
| 1485                                             | 15.43073393                                           | 17.47110151 | 14.51217026 |             |
| 20.2296467                                       | 19.81463433                                           | 23.97034037 |             |             |
| ENSG00000181104                                  | 3284.614197                                           | 2483.302106 | 3154.377691 |             |
| 2480.30363                                       | 2248.095298                                           | 2049.75922  | 2974.097998 |             |
| 2259.38605                                       | 0.396291462                                           | 0.009218192 | 0.057494289 | F2R         |
| 5                                                | 76716043                                              | 76735781    | + 4066      |             |
| protein_coding                                   | coagulation factor II thrombin receptor [Source:HGNC  |             |             |             |
| Symbol;Acc:HGNC:3537]                            | -                                                     | 2839 2679   | 3226 2469   | 2460        |
| 2089                                             | 38.18499438                                           | 29.04954251 | 36.75356277 |             |
| 29.35992434                                      | 26.36491227                                           | 23.98375072 |             |             |
| ENSG00000079999                                  | 2605.477694                                           | 2692.793064 | 2540.320285 |             |
| 3509.996308                                      | 3172.921494                                           | 3154.607895 | 2612.863681 |             |
| 3279.175232                                      | -0.327618691                                          | 0.009251243 | 0.057676896 | KEAP1       |
| 19                                               | 10486120                                              | 10503741    | - 3761      |             |
| protein_coding                                   | kelch like ECH associated protein 1 [Source:HGNC      |             |             |             |
| Symbol;Acc:HGNC:23177]                           | -                                                     | 2252 2905   | 2598 3494   | 3472        |
| 3215                                             | 32.7461137                                            | 34.05467667 | 31.99913725 |             |
| 44.91803857                                      | 40.22860574                                           | 39.90466596 |             |             |
| ENSG00000212694                                  | 69.41770054                                           | 36.15109449 | 70.40148596 |             |
| 4.018312888                                      | 12.79403828                                           | 31.39889662 | 58.65676033 |             |
| 16.07041593                                      | 1.866385852                                           | 0.009259745 | 0.05770637  |             |
| LINC01089                                        | 12                                                    | 121795267   | 121803906   | - 4132      |
| lincRNA                                          | long intergenic non-protein coding RNA 1089           |             |             |             |
| [Source:HGNC Symbol;Acc:HGNC:27886]              | -                                                     | 60          | 39          | 72          |
| 4                                                | 14                                                    | 32          | 0.794119116 | 0.41613884  |
| 0.807187893                                      | 0.046805932                                           | 0.147647576 | 0.361522808 |             |
| ENSG00000158555                                  | 266.1011854                                           | 388.392528  | 324.6290742 |             |
| 495.2570635                                      | 410.323085                                            | 586.7668806 | 326.3742625 |             |
| 497.4490097                                      | -0.606149068                                          | 0.009279725 | 0.057771049 | GDPD5       |
| 11                                               | 75434640                                              | 75525903    | - 9867      |             |
| protein_coding                                   | glycerophosphodiester phosphodiesterase domain        |             |             |             |
| containing 5 [Source:HGNC Symbol;Acc:HGNC:28804] | -                                                     |             |             | 230         |
| 419                                              | 332                                                   | 493         | 449         | 598         |
| 1.872245747                                      | 1.558674432                                           | 2.415811296 | 1.274786397 | 1.982986742 |
| 2.829189852                                      |                                                       |             |             |             |
| ENSG00000232119                                  | 1758.581747                                           | 1529.469382 | 1878.350757 |             |
| 1329.056988                                      | 1334.235421                                           | 1309.922718 | 1722.133962 |             |
| 1324.405042                                      | 0.378668424                                           | 0.009279853 | 0.057771049 | MCTS1       |
| X                                                | 120594010                                             | 120621074   | + 2837      |             |
| protein_coding                                   | "MCTS1, re-initiation and release factor [Source:HGNC |             |             |             |
| Symbol;Acc:HGNC:23357]"                          | -                                                     | 1520 1650   | 1921 1323   | 1460        |
| 1335                                             | 29.30076538                                           | 25.64239385 | 31.36681951 |             |
| 22.54767285                                      | 22.42601549                                           | 21.96685917 |             |             |
| ENSG00000174804                                  | 194.3695615                                           | 138.11572   | 229.7826278 |             |

|                         |                                                       |             |             |                      |
|-------------------------|-------------------------------------------------------|-------------|-------------|----------------------|
| 118.5402302             | 78.59194946                                           | 107.9337071 | 187.4226364 |                      |
| 101.6886289             | 0.882569042                                           | 0.009283322 | 0.057771049 | FZD4                 |
| 11                      | 86945679                                              | 86955391    | -           | 7383                 |
| protein_coding          | frizzled class receptor 4 [Source:HGNC                |             |             |                      |
| Symbol;Acc:HGNC:4042]   | -                                                     | 168         | 149         | 235                  |
| 110                     | 1.244431873                                           | 0.889789667 | 1.474475123 | 118                  |
| 0.772770181             | 0.507603                                              | 0.695513962 |             | 86                   |
| ENSG0000072364          | 3920.943119                                           | 3166.465097 | 3000.863339 |                      |
| 5333.305781             | 4325.2988                                             | 3807.116216 | 3362.757185 |                      |
| 4488.573599             | -0.416824808                                          | 0.00928524  | 0.057771049 | AFF4                 |
| 5                       | 132875379                                             | 132963634   | -           | 11297                |
| protein_coding          | AF4/FMR2 family member 4 [Source:HGNC                 |             |             |                      |
| Symbol;Acc:HGNC:17869]  | AF-4                                                  | 3389        | 3416        | 3069                 |
| 3880                    | 16.40601683                                           | 13.33179697 | 12.58450726 | 5309                 |
| 22.72222275             | 18.25710753                                           | 16.0329941  |             | 4733                 |
| ENSG00000104756         | 1735.442514                                           | 1546.154503 | 1572.299853 |                      |
| 1157.274112             | 1385.411574                                           | 1154.890666 | 1617.965623 |                      |
| 1232.525451             | 0.392053281                                           | 0.009293023 | 0.057795952 | KCTD9                |
| 8                       | 25427847                                              | 25458476    | -           | 4383                 |
| protein_coding          | potassium channel tetramerization domain containing 9 |             |             |                      |
| [Source:HGNC            | Symbol;Acc:HGNC:22401]                                | -           | 1500        | 1668                 |
| 1152                    | 1516                                                  | 1177        | 18.71606312 | 1608                 |
| 16.99483802             | 12.70814686                                           | 15.07253595 | 12.53577037 |                      |
| ENSG0000065665          | 198.9974082                                           | 164.0703519 | 181.8705054 |                      |
| 77.3525231              | 120.6295038                                           | 105.9712761 | 181.6460885 |                      |
| 101.3177677             | 0.840318827                                           | 0.009296843 | 0.057796195 |                      |
| SEC61A2 10              | 12129637                                              | 12169961    | +           | 3916                 |
| protein_coding          | Sec61 translocon alpha 2 subunit [Source:HGNC         |             |             |                      |
| Symbol;Acc:HGNC:17702]  | -                                                     | 172         | 177         | 186                  |
| 108                     | 2.402041335                                           | 1.992803793 | 2.200253482 | 77                   |
| 0.950712619             | 1.468891933                                           | 1.287440326 |             | 132                  |
| ENSG00000258673         | 12.72657843                                           | 11.12341369 | 1.955596832 | 0                    |
| 0                       | 0                                                     | 8.601862985 | 0           | 5.595908916          |
| 0.009349019             | 1                                                     | LINC01397   | 1           | 110082688            |
| 110109719               | +                                                     | 579         | antisense   | long intergenic non- |
| protein_coding          | RNA 1397 [Source:HGNC                                 |             |             |                      |
| Symbol;Acc:HGNC:50677]  | -                                                     | 0           | 0           | 0                    |
| 11                      | 12                                                    | 2           | 0           | 1.038983939          |
| 0.913769463             | 0.160012492                                           | 0           | 0           | 0                    |
| ENSG00000113387         | 4655.613783                                           | 3603.986036 | 3323.536817 |                      |
| 2516.468446             | 3381.281546                                           | 2693.436601 | 3861.045545 |                      |
| 2863.728865             | 0.430715842                                           | 0.009353716 | 0.05812612  | SUB1                 |
| 5                       | 32531633                                              | 32604079    | +           | 9324                 |
| protein_coding          | "SUB1 homolog, transcriptional regulator [Source:HGNC |             |             |                      |
| Symbol;Acc:HGNC:19985]" | PC4                                                   | 4024        | 3888        | 3399                 |
| 2745                    | 23.60208771                                           | 18.38475935 | 16.88695537 | 2505                 |
| 12.98992614             | 17.29251085                                           | 13.74314472 |             | 3700                 |
| ENSG00000129484         | 537.9871792                                           | 670.1856748 | 784.1943298 |                      |
| 531.4218795             | 434.9973016                                           | 392.4862078 | 664.1223946 |                      |
| 452.968463              | 0.55302304                                            | 0.009359385 | 0.058137718 | PARP2                |
| 14                      | 20343582                                              | 20357905    | +           | 4096                 |

|                                    |                                             |                           |                      |             |             |                |             |
|------------------------------------|---------------------------------------------|---------------------------|----------------------|-------------|-------------|----------------|-------------|
| protein_coding                     | poly(ADP-ribose) polymerase 2 [Source:HGNC  |                           |                      |             |             |                |             |
| Symbol;Acc:HGNC:272]               | -                                           | 465                       | 723                  | 802         | 529         | 476            |             |
| 400                                | 6.208514756                                 | 7.782377751               |                      | 9.070200264 |             |                |             |
| 6.244489513                        | 5.064138823                                 | 4.558753179               |                      |             |             |                |             |
| ENSG00000105854                    | 1180.100909                                 | 914.900776                |                      | 1084.378444 |             |                |             |
| 875.9922096                        | 702.7582457                                 | 738.8552862               |                      | 1059.793376 |             |                |             |
| 772.5352472                        | 0.455805852                                 | 0.009377762               |                      | 0.058228207 |             | PON2           |             |
| 7                                  | 95404863                                    | 95435329                  |                      | -           | 3843        |                |             |
| protein_coding                     | paraoxonase 2 [Source:HGNC                  |                           |                      |             |             |                |             |
| Symbol;Acc:HGNC:9205]              | -                                           | 1020                      | 987                  | 1109        | 872         | 769            | 753         |
| 14.51524933                        | 11.32350109                                 | 13.36791322               |                      | 10.97102784 |             |                |             |
| 8.719961211                        | 9.146830423                                 |                           |                      |             |             |                |             |
| ENSG00000152217                    | 254.5315687                                 | 248.4229057               |                      | 466.4098445 |             |                |             |
| 177.8103453                        | 164.4947779                                 | 220.7734919               |                      | 323.1214396 |             |                |             |
| 187.6928717                        | 0.784573774                                 | 0.009385567               |                      | 0.058253007 |             | SETBP1         |             |
| 18                                 | 44680173                                    | 45068510                  |                      | +           | 14025       |                |             |
| protein_coding                     | SET binding protein 1 [Source:HGNC          |                           |                      |             |             |                |             |
| Symbol;Acc:HGNC:15573]             | -                                           | 220                       | 268                  | 477         | 177         | 180            |             |
| 225                                | 0.857856258                                 | 0.842492187               |                      | 1.575498394 |             |                |             |
| 0.61019917                         | 0.55927864                                  | 0.748903196               |                      |             |             |                |             |
| ENSG00000108556                    | 34.70885027                                 | 40.7858502                |                      | 28.35615407 |             | 0              |             |
|                                    | 13.70789816                                 | 3.924862078               |                      | 34.61695151 |             | 5.877586746    |             |
|                                    | 2.546289531                                 | 0.009407                  |                      | 0.058362343 |             | CHRNE          | 17          |
|                                    | 4897774                                     | 4934438                   | -                    | 2864        |             | protein_coding | cholinergic |
| receptor                           | nicotinic                                   | epsilon                   | subunit [Source:HGNC |             |             |                |             |
| Symbol;Acc:HGNC:1966]              | -                                           | 30                        | 44                   | 29          | 0           | 15             | 4           |
| 0.572852686                        | 0.677350757                                 | 0.469058964               |                      | 0           |             | 0.228232161    |             |
|                                    | 0.065197811                                 |                           |                      |             |             |                |             |
| ENSG00000196204                    | 841.1111382                                 | 920.4624829               |                      | 833.0842506 |             |                |             |
| 1235.631213                        | 1026.264642                                 | 1195.120503               |                      | 864.8859572 |             |                |             |
| 1152.338786                        | -0.413527357                                | 0.009411091               |                      | 0.058364037 |             |                |             |
| RNF216P1                           | 7                                           | 4973988                   | 5040675              | +           | 5510        |                |             |
| transcribed_unprocessed_pseudogene |                                             |                           |                      |             |             |                |             |
| pseudogene 1 [Source:HGNC          |                                             |                           |                      |             |             |                |             |
| Symbol;Acc:HGNC:33610]             | -                                           |                           |                      |             |             |                | 727         |
| 993                                | 852                                         | 1230                      | 1123                 | 1218        | 7.215684317 |                |             |
| 7.945689826                        | 7.162925789                                 | 10.79331194               |                      | 8.881508896 |             |                |             |
| 10.31909772                        |                                             |                           |                      |             |             |                |             |
| ENSG00000247315                    | 882.7617586                                 | 948.2710171               |                      | 1090.245234 |             |                |             |
| 1333.075301                        | 1195.32872                                  | 1356.039848               |                      | 973.7593366 |             |                |             |
| 1294.814623                        | -0.410570394                                | 0.009415858               |                      | 0.058369922 |             | ZCCHC3         |             |
| 20                                 | 296968                                      | 300321                    | +                    | 3354        |             | protein_coding | zinc        |
| finger                             | CCHC-type                                   | containing 3 [Source:HGNC |                      |             |             |                |             |
| Symbol;Acc:HGNC:16230]             | -                                           | 763                       | 1023                 | 1115        | 1327        | 1308           | 1382        |
| 12.44102585                        | 13.44765422                                 | 15.39977108               |                      | 19.1297406  |             |                |             |
| 16.99430011                        | 19.23494818                                 |                           |                      |             |             |                |             |
| ENSG00000166797                    | 1168.531292                                 | 1041.893082               |                      | 934.7752859 |             |                |             |
| 653.9804225                        | 891.0133805                                 | 726.0994844               |                      | 1048.399887 |             |                |             |
| 757.0310958                        | 0.468951873                                 | 0.009467778               |                      | 0.058667984 |             | CIA02A         |             |
| 15                                 | 64072559                                    | 64094018                  |                      | -           | 2427        |                |             |
| protein_coding                     | cytosolic iron-sulfur assembly component 2A |                           |                      |             |             |                |             |

|                                     |                                                     |             |             |             |
|-------------------------------------|-----------------------------------------------------|-------------|-------------|-------------|
| [Source:HGNC Symbol;Acc:HGNC:26235] | -                                                   | 1010        | 1124        | 956         |
| 651                                 | 975                                                 | 740         | 22.75864021 | 20.41881305 |
| 18.24696217                         | 12.96917734                                         | 17.50626253 | 14.23337787 |             |
| ENSG00000125952                     | 770.536476                                          | 916.7546783 | 917.1749144 |             |
| 1148.232908                         | 1076.526936                                         | 1259.880727 | 868.1553562 |             |
| 1161.546857                         | -0.4192512                                          | 0.009480591 | 0.05872358  | MAX         |
| 14                                  | 65006174                                            | 65102695    | -           | 4430        |
| protein_coding                      | MYC associated factor X [Source:HGNC                |             |             |             |
| Symbol;Acc:HGNC:6913]               | bHLH                                                | 666         | 989         | 938         |
| 1284                                | 8.22176796                                          | 9.842978202 | 9.808476772 | 1178        |
| 12.47509095                         | 11.58777788                                         | 13.53029711 |             |             |
| ENSG00000114054                     | 742.7693958                                         | 749.9034729 | 742.1489979 |             |
| 618.8201848                         | 526.3832894                                         | 459.2088631 | 744.9406222 |             |
| 534.8041124                         | 0.478309205                                         | 0.009496125 | 0.058782873 | PCCB        |
| 3                                   | 136250306                                           | 136337896   | +           | 7532        |
| protein_coding                      | propionyl-CoA carboxylase subunit beta [Source:HGNC |             |             |             |
| Symbol;Acc:HGNC:8654]               | -                                                   | 642         | 809         | 759         |
| 468                                 | 4.661432819                                         | 4.735568993 | 4.66803303  | 616         |
| 3.954318234                         | 3.332504694                                         | 2.900558157 |             | 576         |
| ENSG00000111145                     | 4819.902341                                         | 3691.119443 | 3270.735702 |             |
| 5612.578526                         | 5650.395622                                         | 4517.516252 | 3927.252495 |             |
| 5260.163467                         | -0.421884292                                        | 0.009497854 | 0.058782873 | ELK3        |
| 12                                  | 96194382                                            | 96269835    | +           | 4648        |
| protein_coding                      | "ELK3, ETS transcription factor [Source:HGNC        |             |             |             |
| Symbol;Acc:HGNC:3325]"              | ETS                                                 | 4166        | 3982        | 3345        |
| 4604                                | 49.01712771                                         | 37.77192288 | 33.33745623 | 5587        |
| 58.1184159                          | 57.96845491                                         | 46.23972381 |             | 6183        |
| ENSG00000101265                     | 108.7543975                                         | 92.69511408 | 111.4690194 |             |
| 38.17397244                         | 25.58807657                                         | 70.6475174  | 104.306177  |             |
| 44.8031888                          | 1.22041329                                          | 0.009535568 | 0.058992404 | RASSF2      |
| 20                                  | 4780023                                             | 4823645     | -           | 5759        |
| association domain                  | family member 2 [Source:HGNC                        |             |             |             |
| Symbol;Acc:HGNC:9883]               |                                                     |             |             |             |
| -                                   | 94                                                  | 100         | 114         | 38          |
| 0.89263824                          | 0.765573478                                         | 0.916980771 | 0.319034562 | 28          |
| 0.211870041                         | 0.58362173                                          |             |             | 72          |
| ENSG00000133597                     | 345.931541                                          | 506.1153229 | 542.678121  |             |
| 841.8365501                         | 591.2673407                                         | 658.3956136 | 464.9083283 |             |
| 697.1665014                         | -0.582862739                                        | 0.009542225 | 0.059009707 | ADCK2       |
| 7                                   | 140673153                                           | 140696261   | +           | 2913        |
| protein_coding                      | aarF domain containing kinase 2 [Source:HGNC        |             |             |             |
| Symbol;Acc:HGNC:19039]              | -                                                   | 299         | 546         | 555         |
| 671                                 | 5.613392583                                         | 8.263920224 | 8.825817732 | 838         |
| 13.90928323                         | 9.678819567                                         | 10.75296102 |             | 647         |
| ENSG00000100294                     | 414.1922799                                         | 530.2160526 | 547.5671131 |             |
| 790.6030607                         | 563.8515444                                         | 829.127114  | 497.3251485 |             |
| 727.860573                          | -0.548133189                                        | 0.009550961 | 0.059039847 | MCAT        |
| 22                                  | 43132206                                            | 43143394    | -           | 2388        |
| protein_coding                      | malonyl-CoA-acyl carrier protein transacylase       |             |             |             |
| [Source:HGNC Symbol;Acc:HGNC:29622] | -                                                   |             |             |             |
| 787                                 | 617                                                 | 845         | 8.198670202 | 358         |
|                                     |                                                     |             |             | 572         |
|                                     |                                                     |             |             | 560         |

|                                        |                                          |                |                        |             |             |
|----------------------------------------|------------------------------------------|----------------|------------------------|-------------|-------------|
| 10.8631596                             | 15.93461689                              | 11.2592494     | 16.51841688            |             |             |
| ENSG00000137331                        | 2698.034628                              | 3342.585814    | 2777.9253              |             |             |
| 3645.614368                            | 4623.21712                               | 3393.043266    | 2939.515247            |             |             |
| 3887.291585                            | -0.403085592                             | 0.009600673    | 0.059323159            | IER3        |             |
| 6                                      | 30743199                                 | 30744554       | - 1356                 |             |             |
| protein_coding                         | immediate early response 3 [Source:HGNC  |                |                        |             |             |
| Symbol;Acc:HGNC:5392]                  | -                                        | 2332 3606      | 2841 3629              | 5059        |             |
| 3458                                   | 94.05103286                              | 117.246528     | 97.05412533            |             |             |
| 129.3982775                            | 162.5786779                              | 119.0450482    |                        |             |             |
| ENSG00000067365                        | 258.0024537                              | 311.4555833    | 236.6272167            |             |             |
| 398.8175541                            | 362.8023713                              | 455.284001     | 268.6950846            |             |             |
| 405.6346422                            | -0.593287544                             | 0.00961209     | 0.059348188            |             |             |
| METTL22 16                             | 8621683 8649654 +                        | 8254           | protein_coding         |             |             |
| methyltransferase like 22 [Source:HGNC | Symbol;Acc:HGNC:28368]                   | -              |                        |             |             |
| 223                                    | 336 242                                  | 397 397        | 464 1.47752593         |             |             |
| 1.794769873                            | 1.358167573                              | 2.325558446    | 2.095967962            |             |             |
| 2.624215835                            |                                          |                |                        |             |             |
| ENSG00000136111                        | 1609.333691                              | 1680.562418    | 2087.599619            |             |             |
| 1305.951689                            | 1273.920669                              | 1474.766926    | 1792.498576            |             |             |
| 1351.546428                            | 0.407649195                              | 0.009612489    | 0.059348188            | TBC1D4      |             |
| 13                                     | 75283503                                 | 75482114       | - 7977                 |             |             |
| protein_coding                         | TBC1 domain family member 4 [Source:HGNC |                |                        |             |             |
| Symbol;Acc:HGNC:19165]                 | -                                        | 1391 1813      | 2135 1300              | 1394        |             |
| 1503                                   | 9.536351508                              | 10.02056409    | 12.3982601             |             |             |
| 7.879614609                            | 7.615208165                              | 8.795599064    |                        |             |             |
| ENSG00000106538                        | 3.470885027                              | 1.853902282    | 21.51156516            | 0           |             |
| 0                                      | 0                                        | 8.945450821    | 0                      | 5.655534203 |             |
| 0.009617267                            | 1                                        | RARRES2 7      | 150338317              | 150341674   |             |
| -                                      | 1921                                     | protein_coding | retinoic acid receptor |             |             |
| responder 2 [Source:HGNC               | Symbol;Acc:HGNC:9868]                    | -              | 3                      | 2           |             |
| 22                                     | 0                                        | 0              | 0.085406043            | 0.045902526 |             |
| 0.530515127                            | 0                                        | 0              | 0                      |             |             |
| ENSG00000253500                        | 1.156961676                              | 2.780853423    | 0.977798416            | 0           |             |
| 61.22861179                            | 8.830939675                              | 1.638537838    | 23.35318382            |             |             |
| -3.821542493                           | 0.009635734                              | 0.059467687    | AF121898.1             |             |             |
| 8                                      | 87540835                                 | 87755718       | - 2910                 |             |             |
| antisense                              | "novel transcript, antisense to CNBD1"   |                |                        |             | 1           |
| 3                                      | 1                                        | 0              | 67                     | 9           | 0.018793243 |
| 0.045452966                            | 0.015918768                              | 0              | 1.003322176            | 0.144376183 |             |
| ENSG00000110066                        | 1220.594568                              | 1055.797349    | 1030.599531            |             |             |
| 1451.615531                            | 1580.977588                              | 1328.565813    | 1102.330483            |             |             |
| 1453.719644                            | -0.399843445                             | 0.009659386    | 0.059589605            | KMT5B       |             |
| 11                                     | 68154863                                 | 68213828       | - 8632                 |             |             |
| protein_coding                         | lysine methyltransferase 5B [Source:HGNC |                |                        |             |             |
| Symbol;Acc:HGNC:24283]                 | -                                        | 1055 1139      | 1054 1445              | 1730        |             |
| 1354                                   | 6.683989219                              | 5.817632058    | 5.656289573            |             |             |
| 8.093896226                            | 8.733599435                              | 7.322396951    |                        |             |             |
| ENSG00000266129                        | 17.35442514                              | 24.10072966    | 15.64477466            | 0           |             |
| 0                                      | 4.906077597                              | 19.03330982    | 1.635359199            |             |             |
| 3.549799781                            | 0.009675564                              | 1              | SRP68P1 17             | 16787235    |             |

|                                                              |              |             |                      |             |
|--------------------------------------------------------------|--------------|-------------|----------------------|-------------|
| 16788141                                                     | -            | 269         | processed_pseudogene | signal      |
| recognition particle 68 pseudogene 1 [Source:HGNC            |              |             |                      |             |
| Symbol;Acc:HGNC:30427]                                       | -            | 15          | 26                   | 16          |
|                                                              |              |             | 0                    | 0           |
| 5                                                            | 3.049535489  | 4.261426733 | 2.755308033          | 0           |
| 0                                                            | 0.867688337  |             |                      |             |
| ENSG00000099949                                              | 253.374607   | 318.8711925 | 290.4061296          |             |
| 392.7900848                                                  | 393.8736072  | 508.2696391 | 287.550643           |             |
| 431.6444437                                                  | -0.584719715 | 0.009699042 | 0.059808466          | LZTR1       |
| 22                                                           | 20982013     | 20999038    | + 8935               |             |
| protein_coding leucine zipper like transcription regulator 1 |              |             |                      |             |
| [Source:HGNC Symbol;Acc:HGNC:6742]                           |              | Others      | 219                  | 344         |
|                                                              | 391          | 431         | 518                  | 1.340430406 |
| 1.539800117                                                  | 2.115842893  | 2.102041622 | 2.706333035          | 297         |
| ENSG00000164087                                              | 506.749214   | 573.7827562 | 806.6836933          |             |
| 460.0968257                                                  | 382.9072886  | 428.791182  | 629.0718878          |             |
| 423.9317654                                                  | 0.570330205  | 0.009702688 | 0.059808466          | POC1A       |
| 3                                                            | 52075253     | 52154690    | - 2247               |             |
| protein_coding POC1 centriolar protein A [Source:HGNC        |              |             |                      |             |
| Symbol;Acc:HGNC:24488]                                       | -            | 438         | 619                  | 825         |
|                                                              | 437          | 10.66020977 | 12.14567161          | 17.00800332 |
| 9.855158697                                                  | 8.125863979  | 9.078715366 |                      | 419         |
| ENSG00000084731                                              | 588.8934929  | 602.5182416 | 531.9223384          |             |
| 728.319211                                                   | 857.200565   | 768.2917517 | 574.444691           |             |
| 784.6038426                                                  | -0.450095608 | 0.009738081 | 0.060002438          | KIF3C       |
| 2                                                            | 25926596     | 25982749    | - 6403               |             |
| protein_coding kinesin family member 3C [Source:HGNC         |              |             |                      |             |
| Symbol;Acc:HGNC:6321]                                        | -            | 509         | 650                  | 544         |
|                                                              | 783          | 4.347393916 | 4.475729311          | 3.935662545 |
| 5.474641954                                                  | 6.383780331  | 5.708530109 |                      |             |
| ENSG00000215712                                              | 369.0707746  | 378.1960655 | 260.0943787          |             |
| 471.1471861                                                  | 553.7990857  | 476.8707425 | 335.7870729          |             |
| 500.6056714                                                  | -0.576797738 | 0.009751953 | 0.060039691          |             |
| TMEM242 6                                                    | 157289386    | 157323601   | - 4644               |             |
| protein_coding transmembrane protein 242 [Source:HGNC        |              |             |                      |             |
| Symbol;Acc:HGNC:17206]                                       | -            | 319         | 408                  | 266         |
|                                                              | 486          | 3.756584695 | 3.873485281          | 2.653333751 |
| 4.882945175                                                  | 5.686421011  | 4.885287128 |                      |             |
| ENSG00000130939                                              | 2038.566473  | 1943.816542 | 2102.266595          |             |
| 1772.075984                                                  | 1251.074172  | 1554.245383 | 2028.216537          |             |
| 1525.798513                                                  | 0.41088176   | 0.009751982 | 0.060039691          | UBE4B       |
| 1                                                            | 10032832     | 10181239    | + 9128               |             |
| protein_coding ubiquitination factor E4B [Source:HGNC        |              |             |                      |             |
| Symbol;Acc:HGNC:12500]                                       | -            | 1762        | 2097                 | 2150        |
|                                                              | 1584         | 10.55662235 | 10.12877111          | 10.9110183  |
| 9.343813595                                                  | 6.535614302  | 8.10075657  |                      |             |
| ENSG00000147439                                              | 240.6480285  | 408.7854531 | 395.0305601          |             |
| 561.5592261                                                  | 499.8813529  | 534.7624581 | 348.1546806          |             |
| 532.0676791                                                  | -0.60959344  | 0.009771655 | 0.060136593          | BIN3        |
| 8                                                            | 22620418     | 22669148    | - 5080               |             |
| protein_coding bridging integrator 3 [Source:HGNC            |              |             |                      |             |

|                        |                                               |             |             |             |      |        |
|------------------------|-----------------------------------------------|-------------|-------------|-------------|------|--------|
| Symbol;Acc:HGNC:1054]  | -                                             | 208         | 441         | 404         | 559  | 547    |
| 545                    | 2.239207476                                   | 3.827443912 | 3.684004132 |             |      |        |
| 5.320461588            | 4.692261548                                   | 5.008167272 |             |             |      |        |
| ENSG00000068120        | 2231.779072                                   | 2687.231357 | 2608.766174 |             |      |        |
| 3190.540433            | 2997.460398                                   | 3427.38581  | 2509.258868 |             |      |        |
| 3205.12888             | -0.352741252                                  | 0.009776341 | 0.060141215 |             |      | COASY  |
| 17                     | 42561467                                      | 42566277    | + 4032      |             |      |        |
| protein_coding         | Coenzyme A synthase [Source:HGNC              |             |             |             |      |        |
| Symbol;Acc:HGNC:29932] | -                                             | 1929        | 2899        | 2668        | 3176 | 3280   |
| 3493                   | 26.16413715                                   | 31.70017428 | 30.65263103 |             |      |        |
| 38.08563376            | 35.44964725                                   | 40.44120598 |             |             |      |        |
| ENSG00000177822        | 220.9796801                                   | 116.7958437 | 118.3136084 |             |      |        |
| 80.36625776            | 81.33352909                                   | 67.70387084 | 152.0297107 |             |      |        |
| 76.4678859             | 0.988378903                                   | 0.009784456 | 0.060166923 |             |      |        |
| AC098864.1             | 4                                             | 181874438   | 182145249   | -           |      | 5551   |
| antisense              | uncharacterized LOC90768 [Source:NCBI         |             |             |             |      |        |
| gene;Acc:90768]        | -                                             | 191         | 126         | 121         | 80   | 89     |
| 1.881728023            | 1.00076769                                    | 1.009756364 | 0.696818987 |             |      | 69     |
| 0.698678497            | 0.580261691                                   |             |             |             |      |        |
| ENSG00000150990        | 1737.756437                                   | 2585.266732 | 2376.050151 |             |      |        |
| 3327.163071            | 2632.830307                                   | 3102.603473 | 2233.02444  |             |      |        |
| 3020.865617            | -0.435377476                                  | 0.009804311 | 0.060250554 |             |      | DHX37  |
| 12                     | 124946825                                     | 124989122   | - 6618      |             |      |        |
| protein_coding         | DEAH-box helicase 37 [Source:HGNC             |             |             |             |      |        |
| Symbol;Acc:HGNC:17210] | -                                             | 1502        | 2789        | 2430        | 3312 | 2881   |
| 3162                   | 12.41188899                                   | 18.58042781 | 17.00912476 |             |      |        |
| 24.19718148            | 18.97033906                                   | 22.30391691 |             |             |      |        |
| ENSG00000186298        | 4816.431456                                   | 3614.182498 | 3946.394408 |             |      |        |
| 3053.917795            | 3543.034745                                   | 2855.337162 | 4125.669454 |             |      |        |
| 3150.763234            | 0.388582014                                   | 0.009805938 | 0.060250554 |             |      | PPP1CC |
| 12                     | 110719680                                     | 110742939   | - 6906      |             |      |        |
| protein_coding         | protein phosphatase 1 catalytic subunit gamma |             |             |             |      |        |
| [Source:HGNC           | Symbol;Acc:HGNC:9283]                         | -           | 4163        | 3899        |      | 4036   |
| 3040                   | 3877                                          | 2910        | 32.96662968 | 24.89204739 |      |        |
| 27.07241753            | 21.28375378                                   | 24.46402009 | 19.67036645 |             |      |        |
| ENSG00000078967        | 325.1062309                                   | 363.3648472 | 328.5402678 |             |      |        |
| 526.3989883            | 474.2932764                                   | 457.2464321 | 339.003782  |             |      |        |
| 485.9795656            | -0.518945708                                  | 0.009820871 | 0.060318063 |             |      | UBE2D4 |
| 7                      | 43926438                                      | 43956136    | + 4713      |             |      |        |
| protein_coding         | ubiquitin conjugating enzyme E2 D4 (putative) |             |             |             |      |        |
| [Source:HGNC           | Symbol;Acc:HGNC:21647]                        | -           | 281         | 392         |      | 336    |
| 524                    | 519                                           | 466         | 3.260645563 | 3.667098582 |      |        |
| 3.302511157            | 5.375700489                                   | 4.798754317 | 4.615667467 |             |      |        |
| ENSG00000162595        | 37.02277362                                   | 23.17377852 | 28.35615407 |             |      |        |
| 12.05493866            | 1.827719755                                   | 1.962431039 | 29.51756874 |             |      |        |
| 5.281696486            | 2.490084552                                   | 0.009831808 | 0.060360983 |             |      | DIRAS3 |
| 1                      | 68045896                                      | 68051631    | - 2039      |             |      |        |
| protein_coding         | DIRAS family GTPase 3 [Source:HGNC            |             |             |             |      |        |
| Symbol;Acc:HGNC:687]   | -                                             | 32          | 25          | 29          | 12   | 2      |
| 2                      | 0.858276982                                   | 0.540575976 | 0.65884496  |             |      |        |

|                                     |                                                      |             |             |                |        |             |  |
|-------------------------------------|------------------------------------------------------|-------------|-------------|----------------|--------|-------------|--|
| 0.284554355                         | 0.042743627                                          | 0.045788752 |             |                |        |             |  |
| ENSG0000064933                      | 815.6579814                                          | 559.8784891 | 568.1008798 |                |        |             |  |
| 303.3826231                         | 486.1734548                                          | 475.8895269 | 647.8791167 |                |        |             |  |
| 421.8152016                         | 0.617686433                                          | 0.009841186 | 0.060394306 | PMS1           |        |             |  |
| 2                                   | 189784085                                            | 189877629   | + 5454      |                |        |             |  |
| protein_coding                      | "PMS1 homolog 1, mismatch repair system component    |             |             |                |        |             |  |
| [Source:HGNC Symbol;Acc:HGNC:9121]" | HMG                                                  | 705         | 604         | 581            |        |             |  |
| 302                                 | 532                                                  | 485         | 7.069174401 | 4.882651898    |        |             |  |
| 4.934730671                         | 2.677275266                                          | 4.250647553 | 4.15119028  |                |        |             |  |
| ENSG00000124783                     | 8309.298755                                          | 6662.9248   | 6989.303079 |                |        |             |  |
| 5920.984041                         | 6092.703803                                          | 5283.845572 | 7320.508878 |                |        |             |  |
| 5765.844472                         | 0.344243644                                          | 0.009849122 | 0.060418749 | SSR1           |        |             |  |
| 6                                   | 7268306                                              | 7347446     | - 11349     | protein_coding | signal |             |  |
| sequence_receptor_subunit_1         | [Source:HGNC Symbol;Acc:HGNC:11323] -                |             |             |                |        |             |  |
| 7182                                | 7188                                                 | 7148        | 5894        | 6667           | 5385   | 34.60847936 |  |
| 27.92443729                         | 29.17624543                                          | 25.110407   | 25.59949846 |                |        |             |  |
| 22.15002126                         |                                                      |             |             |                |        |             |  |
| ENSG00000213753                     | 822.5997514                                          | 1025.207962 | 1046.244305 |                |        |             |  |
| 1395.35915                          | 1207.208898                                          | 1274.59896  | 964.6840062 |                |        |             |  |
| 1292.389003                         | -0.421029767                                         | 0.009860699 | 0.060465508 |                |        |             |  |
| CENPBD1P1                           | 19                                                   | 58573503    | 58599801    | + 4969         |        |             |  |
| transcribed_processed_pseudogene    | CENPB DNA-binding                                    |             |             |                |        |             |  |
| domains_containing_1_pseudogene_1   | [Source:HGNC Symbol;Acc:HGNC:28421]                  |             |             |                |        |             |  |
| -                                   | 711                                                  | 1106        | 1070        | 1389           | 1321   | 1299        |  |
| 7.825197666                         | 9.813413261                                          | 9.975099508 | 13.51557309 |                |        |             |  |
| 11.58490345                         | 12.20355015                                          |             |             |                |        |             |  |
| ENSG00000165476                     | 2448.130906                                          | 1865.952647 | 1760.037149 |                |        |             |  |
| 1549.059618                         | 1480.453001                                          | 1534.621072 | 2024.7069   |                |        |             |  |
| 1521.377897                         | 0.411835303                                          | 0.009870639 | 0.060502187 | REEP3          |        |             |  |
| 10                                  | 63521363                                             | 63625123    | + 5248      |                |        |             |  |
| protein_coding                      | receptor accessory protein 3 [Source:HGNC            |             |             |                |        |             |  |
| Symbol;Acc:HGNC:23711]              | -                                                    | 2116        | 2013        | 1800           | 1542   | 1620        |  |
| 1564                                | 22.05040394                                          | 16.91156918 | 15.88843547 |                |        |             |  |
| 14.2066527                          | 13.45178093                                          | 13.91198043 |             |                |        |             |  |
| ENSG00000129083                     | 3927.884889                                          | 2870.767683 | 2978.373976 |                |        |             |  |
| 2122.673783                         | 2799.152805                                          | 2371.597911 | 3259.008849 |                |        |             |  |
| 2431.141499                         | 0.422337068                                          | 0.009888567 | 0.060577239 | COPB1          |        |             |  |
| 11                                  | 14443440                                             | 14500027    | - 5131      |                |        |             |  |
| protein_coding                      | coatamer protein complex subunit beta 1 [Source:HGNC |             |             |                |        |             |  |
| Symbol;Acc:HGNC:2231]               | -                                                    | 3395        | 3097        | 3046           | 2113   | 3063        |  |
| 2417                                | 36.18532492                                          | 26.61173246 | 27.49985096 |                |        |             |  |
| 19.91125796                         | 26.013787                                            | 21.98976922 |             |                |        |             |  |
| ENSG00000175322                     | 323.9492692                                          | 221.5413227 | 360.8076156 |                |        |             |  |
| 181.8286582                         | 163.5809181                                          | 208.0176901 | 302.0994025 |                |        |             |  |
| 184.4757555                         | 0.711148848                                          | 0.009893451 | 0.060577239 | ZNF519         |        |             |  |
| 18                                  | 14057457                                             | 14132490    | - 15787     |                |        |             |  |
| protein_coding                      | zinc finger protein 519 [Source:HGNC                 |             |             |                |        |             |  |
| Symbol;Acc:HGNC:30574]              | zf-C2H2                                              | 280         | 239         | 369            | 181    | 179         |  |
| 212                                 | 0.96995846                                           | 0.667470767 | 1.082752544 |                |        |             |  |
| 0.554345061                         | 0.494096776                                          | 0.62687693  |             |                |        |             |  |



|                                     |                                                       |             |             |             |
|-------------------------------------|-------------------------------------------------------|-------------|-------------|-------------|
| ENSG00000160688                     | 671.0377719                                           | 850.9411473 | 776.3719424 |             |
| 1203.48471                          | 937.6202342                                           | 1010.651985 | 766.1169539 |             |
| 1050.585643                         | -0.454565942                                          | 0.009897694 | 0.060577239 | FLAD1       |
| 1                                   | 154983338                                             | 154993111   | + 4019      |             |
| protein_coding                      | flavin adenine dinucleotide synthetase 1 [Source:HGNC |             |             |             |
| Symbol;Acc:HGNC:24671]              | -                                                     | 580 918     | 794 1198    | 1026        |
| 1030                                | 7.892320261                                           | 10.07067621 | 9.151766945 |             |
| 14.4125235                          | 11.12469088                                           | 11.96369284 |             |             |
| ENSG00000105063                     | 3024.29782                                            | 3717.074075 | 3862.303744 |             |
| 5199.696877                         | 3941.477651                                           | 4749.083114 | 3534.558546 |             |
| 4630.085881                         | -0.389191896                                          | 0.009898948 | 0.060577239 | PPP6R1      |
| 19                                  | 55229780                                              | 55258995    | - 6583      |             |
| protein_coding                      | protein phosphatase 6 regulatory subunit 1            |             |             |             |
| [Source:HGNC Symbol;Acc:HGNC:29195] | -                                                     | 2614        | 4010        | 3950        |
| 5176                                | 4313 4840                                             | 21.71583039 | 26.85681302 |             |
| 27.79557716                         | 38.01645607                                           | 28.55053171 | 34.32160133 |             |
| ENSG00000154957                     | 273.0429555                                           | 297.5513162 | 249.3385961 |             |
| 474.1609208                         | 423.1171232                                           | 339.5005697 | 273.3109559 |             |
| 412.2595379                         | -0.592740922                                          | 0.009902696 | 0.060577239 | ZNF18       |
| 17                                  | 11977439                                              | 11997510    | - 3012      |             |
| protein_coding                      | zinc finger protein 18 [Source:HGNC                   |             |             |             |
| Symbol;Acc:HGNC:12969]              | zf-C2H2                                               | 236 321     | 255 472     | 463         |
| 346                                 | 4.285009096                                           | 4.698768221 | 3.921820106 |             |
| 7.57684229                          | 6.698608886                                           | 5.362498295 |             |             |
| ENSG00000234129                     | 27.76708022                                           | 24.10072966 | 23.46716199 | 0           |
| 6.397019142                         | 4.906077597                                           | 25.11165729 | 3.767698913 |             |
| 2.726258928                         | 0.00991905                                            | 0.060653005 | AC073529.1  |             |
| X                                   | 10847877                                              | 11111141    | - 3080      |             |
| lincRNA novel transcript            |                                                       | - 24        | 26          | 24 0        |
| 7                                   | 5                                                     | 0.426142881 | 0.372183049 | 0.360963244 |
| 0                                   | 0.099038926                                           | 0.075781871 |             |             |
| ENSG00000131023                     | 1355.959084                                           | 1103.998809 | 1245.715182 |             |
| 1637.462502                         | 1647.689359                                           | 1540.508366 | 1235.224358 |             |
| 1608.553409                         | -0.381574508                                          | 0.009928009 | 0.060683513 | LATS1       |
| 6                                   | 149658153                                             | 149718256   | - 8643      |             |
| protein_coding                      | large tumor suppressor kinase 1 [Source:HGNC          |             |             |             |
| Symbol;Acc:HGNC:6514]               | -                                                     | 1172 1191   | 1274 1630   | 1803        |
| 1570                                | 7.415796633                                           | 6.075488546 | 6.828217885 |             |
| 9.118519011                         | 9.090542707                                           | 8.479713423 |             |             |
| ENSG00000065883                     | 2770.923213                                           | 2691.866113 | 2934.373047 |             |
| 4209.18275                          | 3293.550998                                           | 3321.414533 | 2799.054124 |             |
| 3608.049427                         | -0.366191878                                          | 0.009938056 | 0.060720646 | CDK13       |
| 7                                   | 39949646                                              | 40099580    | + 25093     |             |
| protein_coding                      | cyclin dependent kinase 13 [Source:HGNC               |             |             |             |
| Symbol;Acc:HGNC:1733]               | -                                                     | 2395 2904   | 3001 4190   | 3604        |
| 3385                                | 5.219725252                                           | 5.102440903 | 5.540077813 |             |
| 8.073514932                         | 6.258795958                                           | 6.297267214 |             |             |
| ENSG00000083457                     | 275.3568788                                           | 354.0953358 | 326.584671  |             |
| 194.8881751                         | 173.6333767                                           | 239.4165868 | 318.6789619 |             |
| 202.6460462                         | 0.654569532                                           | 0.009953279 | 0.060789364 | ITGAE       |

|                                                                     |              |             |             |             |                |             |        |
|---------------------------------------------------------------------|--------------|-------------|-------------|-------------|----------------|-------------|--------|
| 17                                                                  | 3714628      | 3801243     | -           | 6657        | protein_coding |             |        |
| integrin subunit alpha E [Source:HGNC Symbol;Acc:HGNC:6147] -       |              |             |             |             |                |             |        |
| 238                                                                 | 382          | 334         | 194         | 190         | 244            | 1.955208663 |        |
|                                                                     | 2.529989763  | 2.324183243 |             | 1.409043463 |                | 1.243751569 |        |
|                                                                     | 1.711028743  |             |             |             |                |             |        |
| ENSG00000232677                                                     | 1.156961676  |             | 0.926951141 |             | 0.977798416    |             |        |
| 6.027469332                                                         | 21.01877718  |             | 14.71823279 |             | 1.020570411    |             |        |
| 13.9214931                                                          | -3.777918516 |             | 0.009977913 |             | 1              | LINC00665   |        |
|                                                                     | 19           | 36313067    | 36331718    |             | -              | 7201        |        |
| lincRNA long intergenic non-protein coding RNA 665 [Source:HGNC     |              |             |             |             |                |             |        |
| Symbol;Acc:HGNC:44323] - 1 1 1 6 23                                 |              |             |             |             |                |             |        |
|                                                                     | 15           | 0.007594547 | 0.006122674 |             | 0.006432942    |             |        |
| 0.040286511                                                         | 0.139185381  |             | 0.097239896 |             |                |             |        |
| ENSG00000011009                                                     | 2015.427239  |             | 2792.903787 |             | 2528.586704    |             |        |
| 2970.537803                                                         | 2963.647582  |             | 3962.148268 |             | 2445.639244    |             |        |
| 3298.777884                                                         | -0.431312084 |             | 0.00999048  |             | 0.060992202    |             | LYPLA2 |
|                                                                     | 1            | 23790970    | 23795539    |             | +              | 2196        |        |
| protein_coding lysophospholipase II [Source:HGNC                    |              |             |             |             |                |             |        |
| Symbol;Acc:HGNC:6738] - 1742 3013 2586 2957 3243                    |              |             |             |             |                |             |        |
|                                                                     | 4038         | 43.38209566 | 60.49239145 |             | 54.55048806    |             |        |
| 65.10587878                                                         | 64.35365392  |             | 85.83808391 |             |                |             |        |
| ENSG00000189343                                                     | 1840.726026  |             | 1757.499363 |             | 1798.171287    |             |        |
| 2131.714987                                                         | 2424.470255  |             | 2280.344867 |             | 1798.798892    |             |        |
| 2278.84337                                                          | -0.341477355 |             | 0.009998257 |             | 0.06101531     |             |        |
| RPS2P46 17                                                          | 19445970     |             | 19446852    |             | -              | 883         |        |
| processed_pseudogene ribosomal protein S2 pseudogene 46             |              |             |             |             |                |             |        |
| [Source:HGNC Symbol;Acc:HGNC:35839] - 1591 1896 1839                |              |             |             |             |                |             |        |
|                                                                     | 2122         | 2653        | 2324        | 98.53810109 | 94.66982785    |             |        |
| 96.47693137                                                         | 116.1945859  |             | 130.9287869 |             | 122.8630963    |             |        |
| ENSG00000100280                                                     | 1034.323738  |             | 1294.950744 |             | 1600.656007    |             |        |
| 904.1203998                                                         | 901.979699   |             | 1027.332649 |             | 1309.97683     |             |        |
| 944.4775826                                                         | 0.47255747   |             | 0.010019662 |             | 0.06112154     |             | AP1B1  |
|                                                                     | 22           | 29327680    | 29423179    |             | -              | 6721        |        |
| protein_coding adaptor related protein complex 1 subunit beta 1     |              |             |             |             |                |             |        |
| [Source:HGNC Symbol;Acc:HGNC:554] - 894 1397 1637                   |              |             |             |             |                |             |        |
|                                                                     | 900          | 987         | 1047        | 7.274419397 | 9.164240304    |             |        |
| 11.28280909                                                         | 6.4745536    |             | 6.399438283 |             | 7.272082917    |             |        |
| ENSG00000147394                                                     | 133.0505927  |             | 193.7327884 |             | 73.33488121    |             |        |
| 257.1720248                                                         | 244.9144471  |             | 237.4541557 |             | 133.3727541    |             |        |
| 246.5135426                                                         | -0.885188902 |             | 0.010056802 |             | 0.061323625    |             | ZNF185 |
|                                                                     | X            | 152914442   | 152973480   |             | +              | 4812        |        |
| protein_coding zinc finger protein 185 with LIM domain [Source:HGNC |              |             |             |             |                |             |        |
| Symbol;Acc:HGNC:12976] - 115 209 75 256 268                         |              |             |             |             |                |             |        |
|                                                                     | 242          | 1.306973959 | 1.914937595 |             | 0.722001501    |             |        |
| 2.572264139                                                         | 2.426988805  |             | 2.34766315  |             |                |             |        |
| ENSG00000185338                                                     | 45.12150535  |             | 12.97731597 |             | 47.91212239    |             |        |
| 6.027469332                                                         | 7.310879019  |             | 10.79337071 |             | 35.33698124    |             |        |
| 8.043906355                                                         | 2.132769746  |             | 0.010063716 |             | 0.061341321    |             | SOCS1  |
|                                                                     | 16           | 11254405    | 11256200    |             | -              | 1796        |        |
| protein_coding suppressor of cytokine signaling 1 [Source:HGNC      |              |             |             |             |                |             |        |

|                         |                                                  |                |                                |                    |           |             |
|-------------------------|--------------------------------------------------|----------------|--------------------------------|--------------------|-----------|-------------|
| Symbol;Acc:HGNC:19383]  | -                                                | 39             | 14                             | 49                 | 6         | 8           |
| 11                      | 1.187552963                                      | 0.343681109    |                                | 1.263840311        |           |             |
| 0.161527375             | 0.194107472                                      | 0.285912003    |                                |                    |           |             |
| ENSG00000244509         | 498.6504822                                      | 455.1330102    |                                | 523.1221526        |           |             |
| 236.0758822             | 365.543951                                       | 372.8618974    |                                | 492.3018817        |           |             |
| 324.8272435             | 0.599159299                                      | 0.010071202    |                                | 0.061362478        |           |             |
| APOBEC3C                | 22                                               | 39014083       | 39020352                       | +                  |           | 2818        |
| protein_coding          | apolipoprotein B mRNA editing enzyme catalytic   |                |                                |                    |           |             |
| subunit 3C [Source:HGNC | Symbol;Acc:HGNC:17353]                           | -              |                                | 431                |           | 491         |
| 535                     | 235                                              | 400            | 380                            | 8.364326828        |           | 7.682002803 |
| 8.794582941             | 4.032070249                                      | 6.185539724    |                                | 6.294897222        |           |             |
| ENSG00000264340         | 0                                                | 0              | 0                              | 12.05493866        |           | 11.88017841 |
| 1.962431039             | 0                                                | 8.632516037    |                                | -5.529982082       |           |             |
| 0.010080306             | 1                                                | AC009704.1     | 18                             | 74561381           |           |             |
| 74562100                | -                                                | 331            | antisense                      | "novel transcript, |           |             |
| antisense to CNDP1"     | -                                                | 0              | 0                              | 0                  | 12        | 13          |
| 2                       | 0                                                | 0              | 0                              | 1.752889214        |           | 1.711488385 |
| 0.282064245             |                                                  |                |                                |                    |           |             |
| ENSG00000013016         | 188.5847531                                      | 193.7327884    |                                | 160.3589403        |           |             |
| 316.4421399             | 255.8807657                                      | 281.6088541    |                                | 180.8921606        |           |             |
| 284.6439199             | -0.653893781                                     | 0.010080361    |                                | 0.061393816        |           | EHD3        |
| 2                       | 31234337                                         | 31269447       |                                | +                  | 4636      |             |
| protein_coding          | EH domain containing 3 [Source:HGNC              |                |                                |                    |           |             |
| Symbol;Acc:HGNC:3244]   | -                                                | 163            | 209                            | 164                | 315       | 280         |
| 287                     | 1.922821147                                      | 1.987635829    |                                | 1.638712915        |           |             |
| 3.285249387             | 2.631923136                                      | 2.889911247    |                                |                    |           |             |
| ENSG00000169933         | 10.41265508                                      | 10.19646255    |                                | 3.911193665        |           | 0           |
| 0                       | 0                                                | 8.173437098    | 0                              | 5.522955293        |           |             |
| 0.010104407             | 1                                                | FRMPD4 X       | 12138466                       |                    | 12724523  |             |
| +                       | 8478                                             | protein_coding | FERM and PDZ domain containing |                    |           |             |
| 4 [Source:HGNC          | Symbol;Acc:HGNC:29007]                           | -              |                                | 9                  | 11        | 4           |
| 0                       | 0                                                | 0              | 0.058055559                    |                    | 0.0572049 |             |
| 0.021855917             | 0                                                | 0              | 0                              |                    |           |             |
| ENSG00000163159         | 1397.609704                                      | 1564.693526    |                                | 1587.944628        |           |             |
| 1870.524649             | 2002.266991                                      | 1941.825513    |                                | 1516.749286        |           |             |
| 1938.205718             | -0.353433528                                     | 0.010131501    |                                | 0.061659572        |           | VPS72       |
| 1                       | 151169987                                        | 151195321      |                                | -                  | 4545      |             |
| protein_coding          | vacuolar protein sorting 72 homolog [Source:HGNC |                |                                |                    |           |             |
| Symbol;Acc:HGNC:11644]  | -                                                | 1208           | 1688                           | 1624               | 1862      | 2191        |
| 1979                    | 14.53542583                                      | 16.37466835    |                                | 16.55215685        |           |             |
| 19.80829091             | 21.00714764                                      | 20.32628181    |                                |                    |           |             |
| ENSG00000188486         | 4122.254451                                      | 6450.652989    |                                | 8283.908182        |           |             |
| 4256.397927             | 4167.201041                                      | 4861.922899    |                                | 6285.605207        |           |             |
| 4428.507289             | 0.505416013                                      | 0.010132063    |                                | 0.061659572        |           | H2AFX       |
| 11                      | 119093854                                        | 119095467      |                                | -                  | 1614      |             |
| protein_coding          | H2A histone family member X [Source:HGNC         |                |                                |                    |           |             |
| Symbol;Acc:HGNC:4739]   | -                                                | 3563           | 6959                           | 8472               | 4237      | 4560        |
| 4955                    | 120.7277216                                      | 190.0978758    |                                | 243.155934         |           |             |
| 126.9276239             | 123.1175345                                      | 143.3131904    |                                |                    |           |             |
| ENSG00000170425         | 328.5771159                                      | 357.8031404    |                                | 417.5199237        |           |             |

|                        |                                              |             |             |                  |
|------------------------|----------------------------------------------|-------------|-------------|------------------|
| 178.8149235            | 264.1055046                                  | 262.9657592 | 367.9667267 |                  |
| 235.2953958            | 0.645002953                                  | 0.010139887 | 0.061682629 |                  |
| ADORA2B 17             | 15944917                                     | 15975746    | +           | 2551             |
| protein_coding         | adenosine A2b receptor [Source:HGNC          |             |             |                  |
| Symbol;Acc:HGNC:264]   | -                                            | 284         | 386         | 427 178 289      |
| 268                    | 6.088391825                                  | 6.671305119 | 7.753894224 |                  |
| 3.373733396            | 4.936805098                                  | 4.904224824 |             |                  |
| ENSG00000169057        | 2208.639839                                  | 2357.236751 | 2388.761531 |                  |
| 3439.675832            | 2733.354893                                  | 2779.783567 | 2318.212707 |                  |
| 2984.271431            | -0.364129877                                 | 0.010175887 | 0.061877    | MECP2            |
| X                      | 154021573                                    | 154137103   | -           | 18366            |
| protein_coding         | methyl-CpG binding protein 2 [Source:HGNC    |             |             |                  |
| Symbol;Acc:HGNC:6990]  | MBD                                          | 1909        | 2543        | 2443 3424 2991   |
| 2833                   | 5.684418722                                  | 6.104719843 | 6.161853134 |                  |
| 9.01405892             | 7.096765105                                  | 7.200754929 |             |                  |
| ENSG00000143507        | 1553.79953                                   | 1759.353265 | 1254.515368 |                  |
| 1940.845125            | 2730.613314                                  | 1738.7139   | 1522.556055 |                  |
| 2136.724113            | -0.489034754                                 | 0.010181381 | 0.061885797 | DUSP10           |
| 1                      | 221701424                                    | 221742176   | -           | 2914             |
| protein_coding         | dual specificity phosphatase 10 [Source:HGNC |             |             |                  |
| Symbol;Acc:HGNC:3065]  | -                                            | 1343        | 1898        | 1283 1932 2988   |
| 1772                   | 25.20467942                                  | 28.71710252 | 20.39574459 |                  |
| 32.05669839            | 44.6837531                                   | 28.38704629 |             |                  |
| ENSG00000141002        | 3696.492554                                  | 3565.981039 | 4449.960592 |                  |
| 3306.066929            | 2809.205263                                  | 3006.444352 | 3904.144728 |                  |
| 3040.572181            | 0.360787444                                  | 0.010196667 | 0.061954075 | TCF25            |
| 16                     | 89873570                                     | 89913627    | +           | 7967             |
| protein_coding         | transcription factor 25 [Source:HGNC         |             |             |                  |
| Symbol;Acc:HGNC:29181] | Others                                       | 3195        | 3847        | 4551 3291 3074   |
| 3064                   | 21.9316223                                   | 21.28929731 | 26.46150092 |                  |
| 19.97258516            | 16.81386839                                  | 17.9531219  |             |                  |
| ENSG00000261373        | 87.92908735                                  | 64.88657986 | 127.1137941 |                  |
| 165.7554066            | 177.2888162                                  | 177.600009  | 93.30982044 |                  |
| 173.5480773            | -0.895631741                                 | 0.010208201 | 0.061999509 |                  |
| VPS9D1-AS1             | 16                                           | 89711856    | 89718165    | +                |
| antisense              | VPS9D1 antisense RNA 1 [Source:HGNC          |             |             | 1753             |
| Symbol;Acc:HGNC:48915] | -                                            | 76          | 70          | 130 165 194      |
| 181                    | 2.370971802                                  | 1.760556965 | 3.435293851 |                  |
| 4.550962371            | 4.822568572                                  | 4.819951793 |             |                  |
| ENSG00000146223        | 9999.619763                                  | 8971.960092 | 8258.485423 |                  |
| 10885.60961            | 11658.11046                                  | 11284.95969 | 9076.688426 |                  |
| 11276.22659            | -0.31315163                                  | 0.010223969 | 0.062048202 | RPL7L1           |
| 6                      | 42879618                                     | 42889925    | +           | 7809             |
| protein_coding         | ribosomal protein L7 like 1 [Source:HGNC     |             |             |                  |
| Symbol;Acc:HGNC:21370] | -                                            | 8643        | 9679        | 8446 10836 12757 |
| 11501                  | 60.52904236                                  | 54.64733972 | 50.10235157 |                  |
| 67.09262593            | 71.18880953                                  | 68.75213933 |             |                  |
| ENSG00000173511        | 1394.138819                                  | 1975.332881 | 1730.703197 |                  |
| 1860.478867            | 2602.672931                                  | 2525.648747 | 1700.058299 |                  |
| 2329.600182            | -0.454109129                                 | 0.010228275 | 0.062048202 | VEGFB            |

|                                                   |                                                      |                             |             |             |             |        |
|---------------------------------------------------|------------------------------------------------------|-----------------------------|-------------|-------------|-------------|--------|
| 11                                                | 64234538                                             | 64238793                    | +           | 1545        |             |        |
| protein_coding                                    | vascular endothelial growth factor B [Source:HGNC    |                             |             |             |             |        |
| Symbol;Acc:HGNC:12681]                            | -                                                    | 1205                        | 2131        | 1770        | 1852        | 2848   |
| 2574                                              | 42.65336272                                          | 60.81194918                 |             | 53.06977403 |             |        |
| 57.95804331                                       | 80.32858169                                          | 77.77250628                 |             |             |             |        |
| ENSG00000126457                                   | 7185.888968                                          | 7821.613726                 |             | 8542.046964 |             |        |
| 6071.670774                                       | 6312.030173                                          | 6561.388179                 |             | 7849.849886 |             |        |
| 6315.029709                                       | 0.313954449                                          | 0.010228395                 |             | 0.062048202 |             | PRMT1  |
| 19                                                | 49675786                                             | 49689029                    | +           | 4796        |             |        |
| protein_coding                                    | protein arginine methyltransferase 1 [Source:HGNC    |                             |             |             |             |        |
| Symbol;Acc:HGNC:5187]                             | -                                                    | 6211                        | 8438        | 8736        | 6044        | 6907   |
| 6687                                              | 70.8234482                                           | 77.57009165                 |             | 84.37929777 |             |        |
| 60.93214933                                       | 62.75796886                                          | 65.08758901                 |             |             |             |        |
| ENSG00000240849                                   | 665.2529635                                          | 737.8531081                 |             | 842.8622347 |             |        |
| 918.1844949                                       | 1098.459573                                          | 1030.276295                 |             | 748.6561021 |             |        |
| 1015.640121                                       | -0.439614534                                         | 0.010234201                 |             | 0.062058796 |             |        |
| TMEM189 20                                        | 50118254                                             | 50153734                    | -           | 7931        |             |        |
| protein_coding                                    | transmembrane protein 189 [Source:HGNC               |                             |             |             |             |        |
| Symbol;Acc:HGNC:16735]                            | -                                                    | 575                         | 796         | 862         | 914         | 1202   |
| 1050                                              | 3.96492163                                           | 4.425059104                 |             | 5.034794763 |             |        |
| 5.572107191                                       | 6.604426564                                          | 6.180269094                 |             |             |             |        |
| ENSG00000100321                                   | 11.56961676                                          | 18.53902282                 | 0           | 0           | 0           |        |
| 0                                                 | 10.03621319                                          | 0                           | 5.820321298 | 0.010252547 |             |        |
| 1                                                 | SYNGR1 22                                            | 39349925                    |             | 39385588    |             | +      |
| 6953                                              | protein_coding                                       | synaptogyrin 1 [Source:HGNC |             |             |             |        |
| Symbol;Acc:HGNC:11498]                            | -                                                    | 10                          | 20          | 0           | 0           | 0      |
| 0                                                 | 0.078654302                                          | 0.126821161                 |             | 0           | 0           | 0      |
| 0                                                 |                                                      |                             |             |             |             |        |
| ENSG00000181789                                   | 4111.841795                                          | 3714.293221                 |             | 4168.354648 |             |        |
| 3066.977312                                       | 3225.925367                                          | 3320.433318                 |             | 3998.163222 |             |        |
| 3204.445332                                       | 0.319148923                                          | 0.010268067                 |             | 0.062223448 |             | COPG1  |
| 3                                                 | 129249606                                            | 129277773                   | +           | 4425        |             |        |
| protein_coding                                    | coatmer protein complex subunit gamma 1 [Source:HGNC |                             |             |             |             |        |
| Symbol;Acc:HGNC:2236]                             | -                                                    | 3554                        | 4007        | 4263        | 3053        | 3530   |
| 3384                                              | 43.92369439                                          | 39.92454959                 |             | 44.62770087 |             |        |
| 33.3591323                                        | 34.7632225                                           | 35.69958069                 |             |             |             |        |
| ENSG00000148308                                   | 1336.290735                                          | 1389.49976                  |             | 1409.985316 |             |        |
| 1908.698622                                       | 1548.992492                                          | 1934.957004                 |             | 1378.591937 |             |        |
| 1797.549373                                       | -0.382527609                                         | 0.01027006                  |             | 0.062223448 |             | GTF3C5 |
| 9                                                 | 133030675                                            | 133058503                   | +           | 3592        |             |        |
| protein_coding                                    | general transcription factor IIIC subunit 5          |                             |             |             |             |        |
| [Source:HGNC Symbol;Acc:HGNC:4668]                | -                                                    |                             |             | 1155        | 1499        | 1442   |
| 1900                                              | 1695                                                 | 1972                        |             | 17.58491887 | 18.39921367 |        |
| 18.59650744                                       | 25.57516766                                          | 20.56326026                 |             | 25.6281123  |             |        |
| ENSG00000157445                                   | 62.47593049                                          | 18.53902282                 |             | 27.37835565 |             |        |
| 14.06409511                                       | 3.65543951                                           | 0                           | 36.13110299 | 5.906511539 |             |        |
| 2.615613012                                       | 0.010273565                                          | 0.062223448                 |             | CACNA2D3    |             |        |
| 3                                                 | 54122547                                             | 55074557                    | +           | 4670        |             |        |
| protein_coding                                    | calcium voltage-gated channel auxiliary subunit      |                             |             |             |             |        |
| alpha2delta 3 [Source:HGNC Symbol;Acc:HGNC:15460] | -                                                    |                             |             |             |             | 54     |

|                        |                                                      |             |             |             |      |             |        |
|------------------------|------------------------------------------------------|-------------|-------------|-------------|------|-------------|--------|
| 0.1888196              | 20                                                   | 28          | 14          | 4           | 0    | 0.632370486 |        |
| ENSG00000145781        | 0.27774331                                           | 0.144948048 | 0.037325163 | 0           |      |             | 0      |
| 444.0235741            | 682.6073887                                          | 637.7423849 | 571.034275  |             |      |             |        |
| 454.3589678            | 470.6378369                                          | 448.4154924 | 630.4613495 |             |      |             |        |
| COMMD10                | 5                                                    | 0.472001386 | 0.010282502 | 0.062252916 |      |             |        |
| protein_coding         | 116084991                                            | 116412762   | +           | 2464        |      |             |        |
| Symbol;Acc:HGNC:30201] | COMM domain containing 10 [Source:HGNC               |             |             |             |      |             |        |
| 457                    | -                                                    | 590         | 688         | 584         | 442  |             | 515    |
| 8.673268325            | 13.09501562                                          | 12.31067008 | 10.97929867 |             |      |             |        |
| ENSG00000223496        | 9.108044069                                          | 8.658078765 |             |             |      |             |        |
| 2836.928899            | 2154.26264                                           | 2726.163305 | 2464.052009 |             |      |             |        |
| 3165.509323            | 3406.869623                                          | 3252.729447 | 2448.159318 |             |      |             |        |
| 16                     | -0.370462285                                         | 0.010300952 | 0.062339925 |             |      |             | EXOSC6 |
| protein_coding         | 70246778                                             | 70251930    | -           | 5153        |      |             |        |
| Symbol;Acc:HGNC:19055] | exosome component 6 [Source:HGNC                     |             |             |             |      |             |        |
| 3315                   | -                                                    | 1862        | 2941        | 2520        | 2824 |             | 3728   |
| 26.49755281            | 19.76124247                                          | 25.16337212 | 22.65389348 |             |      |             |        |
| ENSG00000240445        | 31.52639837                                          | 30.03097456 |             |             |      |             |        |
| 297.3551537            | 190.8986765                                          | 133.4809643 | 183.8261022 |             |      |             |        |
| 274.2475088            | 286.9520015                                          | 238.4353712 | 169.4019143 |             |      |             |        |
| 17                     | -0.696814969                                         | 0.010320816 | 0.06239409  |             |      |             | FOXO3B |
| processed_pseudogene   | 18670946                                             | 18672873    | -           | 1928        |      |             |        |
| Symbol;Acc:HGNC:3822]  | forkhead box O3B pseudogene [Source:HGNC             |             |             |             |      |             |        |
| 243                    | -                                                    | 165         | 144         | 188         | 296  |             | 314    |
| 7.42311003             | 4.680277755                                          | 3.292982483 | 4.517033126 |             |      |             |        |
| ENSG00000123908        | 7.097104766                                          | 5.883628999 |             |             |      |             |        |
| 4817.957153            | 3636.330547                                          | 3273.064478 | 3200.334216 |             |      |             |        |
| 4334.863898            | 3682.855306                                          | 4503.779234 | 3369.909747 |             |      |             |        |
| 8                      | -0.363332417                                         | 0.010323318 | 0.06239409  |             |      |             | AGO2   |
| protein_coding         | 140520156                                            | 140635619   | -           | 15833       |      |             |        |
| Symbol;Acc:HGNC:3263]" | "argonaute 2, RISC catalytic component [Source:HGNC  |             |             |             |      |             |        |
| 4590                   | -                                                    | 3143        | 3531        | 3273        | 4796 |             | 4030   |
| 14.64593759            | 10.85615117                                          | 9.832602078 | 9.576024518 |             |      |             |        |
| ENSG00000102007        | 11.09175919                                          | 13.53304449 |             |             |      |             |        |
| 2335.644366            | 3610.87739                                           | 3279.553136 | 3701.944804 |             |      |             |        |
| 2737.828525            | 2817.430002                                          | 3060.411205 | 3530.791777 |             |      |             |        |
| X                      | 0.366824327                                          | 0.01032531  | 0.06239409  |             |      |             | PLP2   |
| protein_coding         | 49171926                                             | 49175239    | +           | 1279        |      |             |        |
| Symbol;Acc:HGNC:9087]  | proteolipid protein 2 [Source:HGNC                   |             |             |             |      |             |        |
| 3119                   | -                                                    | 3121        | 3538        | 3786        | 2325 |             | 3083   |
| 87.89286663            | 133.449803                                           | 121.9610745 | 137.1236993 |             |      |             |        |
| ENSG00000204237        | 105.0416604                                          | 113.838946  |             |             |      |             |        |
| 534.4356141            | 380.6403913                                          | 420.8358179 | 400.8973506 |             |      |             |        |
| 562.9990453            | 616.8554173                                          | 537.7061047 | 400.7911866 |             |      |             |        |
| 17                     | -0.49001753                                          | 0.010326228 | 0.06239409  |             |      |             | OXLD1  |
| protein_coding         | 81665036                                             | 81666635    | -           | 1600        |      |             |        |
| Symbol;Acc:HGNC:27901] | oxidoreductase like domain containing 1 [Source:HGNC |             |             |             |      |             |        |
| 548                    | -                                                    | 329         | 454         | 410         | 532  |             | 675    |
| 16.07655039            | 11.24528918                                          | 12.5103606  | 11.87042668 |             |      |             |        |
|                        | 18.3841006                                           | 15.98845915 |             |             |      |             |        |

|                      |                                        |              |                        |         |
|----------------------|----------------------------------------|--------------|------------------------|---------|
| ENSG00000125388      | 104.1265508                            | 135.3348666  | 125.1581973            |         |
| 171.782876           | 232.1204089                            | 217.8298453  | 121.5398715            |         |
| 207.2443767          | -0.768496668                           | 0.010333862  | 0.062415545            | GRK4    |
| 4                    | 2963608 3040747                        | + 4686       | protein_coding         | G       |
| protein-coupled      | receptor kinase 4                      | [Source:HGNC | Symbol;Acc:HGNC:4543]  |         |
| -                    | 90 146                                 | 128 171      | 254 222                |         |
| 1.050352172          | 1.373676692                            | 1.265348461  | 1.764391848            |         |
| 2.362055132          | 2.211549814                            |              |                        |         |
| ENSG00000187079      | 4809.489686                            | 4039.653072  | 4763.833884            |         |
| 3899.772658          | 3422.405241                            | 3417.573654  | 4537.65888             |         |
| 3579.917184          | 0.341939559                            | 0.010341341  | 0.062436052            | TEAD1   |
| 11                   | 12674591                               | 12944483     | + 10279                |         |
| protein_coding       | TEA domain transcription factor 1      | [Source:HGNC | Symbol;Acc:HGNC:11714] | TEA     |
| 3483                 | 22.11688049                            | 18.69262605  | 21.9562855             | 3745    |
| 18.26021478          | 15.87667496                            | 15.81789339  |                        |         |
| ENSG00000133835      | 1299.267962                            | 1400.623174  | 1568.38866             |         |
| 961.3813585          | 1003.418145                            | 1228.48183   | 1422.759932            |         |
| 1064.427111          | 0.418912095                            | 0.010353096  | 0.062458417            |         |
| HSD17B4 5            | 119452443                              | 119637199    | + 10664                |         |
| protein_coding       | hydroxysteroid 17-beta dehydrogenase 4 | [Source:HGNC | Symbol;Acc:HGNC:5213]  | -       |
| 1252                 | 5.759096194                            | 6.247097525  | 6.967655717            | 1098    |
| 4.339033647          | 4.486842258                            | 5.480626778  |                        |         |
| ENSG00000269834      | 12.72657843                            | 34.29719221  | 16.62257307            |         |
| 34.15565955          | 80.41966921                            | 78.49724156  | 21.21544791            |         |
| 64.35752344          | -1.593960598                           | 0.010353217  | 0.062458417            |         |
| ZNF528-AS1           | 19 52388842                            | 52397766     | -                      | 4160    |
| processed_transcript | ZNF528 antisense RNA 1                 | [Source:HGNC | Symbol;Acc:HGNC:51305] | -       |
| 80                   | 0.144608582                            | 0.39214109   | 0.18930324             | 88      |
| 0.39517258           | 0.921823848                            | 0.897723703  |                        |         |
| ENSG00000265688      | 112.2252825                            | 261.4002217  | 219.0268452            |         |
| 293.3368408          | 318.0232373                            | 423.8851044  | 197.5507832            |         |
| 345.0817275          | -0.80151529                            | 0.010392735  | 0.062663088            | MAFG-   |
| DT 17                | 81927829                               | 81930753     | + 1895                 |         |
| antisense            | MAFG divergent transcript              | [Source:HGNC | Symbol;Acc:HGNC:43649] | -       |
| 432                  | 2.799350203                            | 6.561057623  | 5.475720345            | 348     |
| 7.450318748          | 8.002554258                            | 10.64193418  |                        |         |
| ENSG00000115966      | 1239.105955                            | 857.4298053  | 1028.643934            |         |
| 732.3375239          | 827.9570489                            | 690.7757257  | 1041.726565            |         |
| 750.3567662          | 0.472317891                            | 0.010395342  | 0.062663088            | ATF2    |
| 2                    | 175072250                              | 175168382    | - 5751                 |         |
| protein_coding       | activating transcription factor 2      | [Source:HGNC | Symbol;Acc:HGNC:784]   | TF_bZIP |
| 704                  | 10.18452588                            | 7.091405553  | 8.473734022            | 906     |
| 6.128940105          | 6.865045624                            | 5.714461714  |                        |         |
| ENSG00000047188      | 896.6452987                            | 880.6035838  | 855.5736141            |         |
| 745.3970407          | 583.9564617                            | 603.4475445  | 877.6074989            |         |

|                        |                                                     |             |             |             |
|------------------------|-----------------------------------------------------|-------------|-------------|-------------|
| 644.2670156            | 0.44616188                                          | 0.010400744 | 0.06267094  | YTHDC2      |
| 5                      | 113513683                                           | 113595285   | + 10816     |             |
| protein_coding         | YTH domain containing 2 [Source:HGNC                |             |             |             |
| Symbol;Acc:HGNC:24721] | -                                                   | 775 950     | 875 742     | 639         |
| 615                    | 3.918589195                                         | 3.872495169 | 3.747518886 |             |
| 3.31694632             | 2.574499295                                         | 2.654327295 |             |             |
| ENSG00000244045        | 328.5771159                                         | 425.4705736 | 322.6734773 |             |
| 588.6828381            | 492.5704739                                         | 490.6077597 | 358.9070556 |             |
| 523.9536906            | -0.544637259                                        | 0.010416059 | 0.062738491 |             |
| TMEM199 17             | 28357581                                            | 28363683    | + 4620      |             |
| protein_coding         | transmembrane protein 199 [Source:HGNC              |             |             |             |
| Symbol;Acc:HGNC:18085] | -                                                   | 284 459     | 330 586     | 539         |
| 500                    | 3.361793841                                         | 4.380308193 | 3.308829737 |             |
| 6.132772535            | 5.083998191                                         | 5.052124735 |             |             |
| ENSG00000076770        | 1388.354011                                         | 1102.144906 | 1175.313696 |             |
| 1006.587378            | 757.5898384                                         | 926.2674504 | 1221.937538 |             |
| 896.8148891            | 0.446082281                                         | 0.010422092 | 0.062748197 | MBNL3       |
| X                      | 132369317                                           | 132489968   | - 12199     |             |
| protein_coding         | muscleblind like splicing regulator 3 [Source:HGNC  |             |             |             |
| Symbol;Acc:HGNC:20564] | -                                                   | 1200 1189   | 1202 1002   | 829         |
| 944                    | 5.379621585                                         | 4.297259509 | 4.564389442 |             |
| 3.971409833            | 2.961344256                                         | 3.612383075 |             |             |
| ENSG00000100625        | 397.9948164                                         | 216.906567  | 274.7613549 |             |
| 170.7782977            | 168.1502174                                         | 194.2806729 | 296.5542461 |             |
| 177.736396             | 0.736606779                                         | 0.01042588  | 0.062748197 | SIX4        |
| 14                     | 60709528                                            | 60724348    | - 6658      |             |
| protein_coding         | SIX homeobox 4 [Source:HGNC Symbol;Acc:HGNC:10890]  |             |             |             |
| Homeobox               | 344                                                 | 234 281     | 170 184 198 |             |
| 2.825591429            | 1.549551535                                         | 1.955082034 | 1.234543357 |             |
| 1.204294298            | 1.388249211                                         |             |             |             |
| ENSG00000232716        | 0                                                   | 0.926951141 | 0.977798416 | 45.20601999 |
| 0                      | 5.887293117                                         | 0.634916519 |             |             |
| 17.03110437            | -4.699038942                                        | 0.010431745 | 1           | AC016831.2  |
| 7                      | 130840204                                           | 130843725   | - 1723      |             |
| processed_pseudogene   | zinc finger protein 131 (ZNF131) pseudogene         |             |             |             |
| -                      | 0                                                   | 1 1 45      | 0 6 0       |             |
| 0.025588727            | 0.026885442                                         | 1.262782204 | 0           |             |
| 0.16255937             |                                                     |             |             |             |
| ENSG00000279267        | 89.08604903                                         | 116.7958437 | 55.73450972 |             |
| 136.6226382            | 224.8095298                                         | 152.0884055 | 87.2054675  |             |
| 171.1735245            | -0.972983782                                        | 0.01044037  | 0.062806215 |             |
| AL078621.3             | 2                                                   | 113605867   | 113607908   | - 2042      |
| TEC                    | TEC                                                 | - 77 126    | 57 136      | 246         |
| 155                    | 2.062194861                                         | 2.72050022  | 1.293068624 |             |
| 3.220211429            | 5.249742081                                         | 3.543414812 |             |             |
| ENSG00000105698        | 1307.366694                                         | 1896.542034 | 1631.945557 |             |
| 1935.822234            | 2197.833005                                         | 2366.691833 | 1611.951428 |             |
| 2166.782357            | -0.426148972                                        | 0.010457465 | 0.062806215 | USF2        |
| 19                     | 35268978                                            | 35279821    | + 4952      |             |
| protein_coding         | "upstream transcription factor 2, c-fos interacting |             |             |             |



|                                             |                                                        |                 |             |       |
|---------------------------------------------|--------------------------------------------------------|-----------------|-------------|-------|
| [Source:HGNC Symbol;Acc:HGNC:12594]"        | bHLH                                                   | 1130            | 2046        | 1669  |
| 1927                                        | 2405 2412                                              | 12.47936595     | 18.21624889 |       |
| 15.61270509                                 | 18.81491649                                            | 21.16377045     | 22.73749954 |       |
| ENSG00000163006                             | 522.9466774                                            | 439.3748408     | 460.543054  |       |
| 256.1674466                                 | 328.075696                                             | 372.8618974     | 474.2881907 |       |
| 319.0350133                                 | 0.571147665                                            | 0.010458347     | 0.062806215 |       |
| CCDC138 2                                   | 108786757                                              | 108885477       | + 5796      |       |
| protein_coding                              | coiled-coil domain containing 138                      | [Source:HGNC    |             |       |
| Symbol;Acc:HGNC:26531]                      | -                                                      | 452 474         | 471 255     | 359   |
| 380                                         | 4.264859915                                            | 3.60565295      | 3.764393251 |       |
| 2.127223                                    | 2.69913539                                             | 3.060562521     |             |       |
| ENSG00000172071                             | 226.7644884                                            | 202.0753487     | 266.9389676 |       |
| 138.6317946                                 | 131.5958223                                            | 154.0508366     | 231.9262683 |       |
| 141.4261512                                 | 0.713768716                                            | 0.010458817     | 0.062806215 |       |
| EIF2AK3 2                                   | 88556741                                               | 88627576        | - 5434      |       |
| protein_coding                              | eukaryotic translation initiation factor 2 alpha       |                 |             |       |
| kinase 3 [Source:HGNC Symbol;Acc:HGNC:3255] | -                                                      |                 | 196 218     |       |
| 273                                         | 138 144                                                | 157 1.972564214 | 1.768767776 |       |
| 2.327263021                                 | 1.227893411                                            | 1.154785856     | 1.348733219 |       |
| ENSG00000079785                             | 3874.664652                                            | 3025.568524     | 2999.885541 |       |
| 2478.294474                                 | 2679.437161                                            | 2500.137144     | 3300.039572 |       |
| 2552.622926                                 | 0.370109239                                            | 0.010458997     | 0.062806215 | DDX1  |
| 2                                           | 15591178                                               | 15631111        | + 3833      |       |
| protein_coding                              | DEAD-box helicase 1 [Source:HGNC Symbol;Acc:HGNC:2734] |                 |             |       |
| -                                           | 3349 3264                                              | 3068 2467       | 2932 2548   |       |
| 47.78273903                                 | 37.54441042                                            | 37.07822981     | 31.11942377 |       |
| 33.33371704                                 | 31.03177661                                            |                 |             |       |
| ENSG00000224877                             | 458.1568236                                            | 585.833121      | 704.0148596 |       |
| 385.7580373                                 | 466.0685375                                            | 294.3646558     | 582.6682681 |       |
| 382.0637435                                 | 0.609198362                                            | 0.01046017      | 0.062806215 |       |
| NDUF8 17                                    | 81239239                                               | 81241281        | + 1376      |       |
| protein_coding                              | NADH:ubiquinone oxidoreductase complex assembly factor |                 |             |       |
| 8 [Source:HGNC Symbol;Acc:HGNC:33551]       | -                                                      |                 | 396 632     | 720   |
| 384                                         | 510 300                                                | 15.7387945      | 20.2503532  |       |
| 24.23910156                                 | 13.49317046                                            | 16.15140621     | 10.17768152 |       |
| ENSG00000226864                             | 9.255693406                                            | 17.61207168     | 13.68917783 |       |
| 85.38914887                                 | 24.67421669                                            | 35.3237587      | 13.51898097 |       |
| 48.46237475                                 | -1.83406458                                            | 0.01047614      | 0.062877407 | ATE1- |
| AS1 10                                      | 121928312                                              | 121951965       | + 1172      |       |
| transcribed_unitary_pseudogene              | ATE1 antisense RNA 1 [Source:HGNC                      |                 |             |       |
| Symbol;Acc:HGNC:49496]                      | -                                                      | 8 19            | 14 85       | 27    |
| 36                                          | 0.373299225                                            | 0.714759518     | 0.553353778 |       |
| 3.506650885                                 | 1.003909931                                            | 1.433906802     |             |       |
| ENSG00000197982                             | 779.7921694                                            | 1015.011499     | 965.0870368 |       |
| 1254.718199                                 | 1132.272388                                            | 1323.659736     | 919.9635685 |       |
| 1236.883441                                 | -0.426100896                                           | 0.010486771     | 0.062916513 |       |
| C1orf122                                    | 1 37806979                                             | 37809454        | + 2231      |       |
| protein_coding                              | chromosome 1 open reading frame 122                    |                 |             |       |
| [Source:HGNC Symbol;Acc:HGNC:24789]         | -                                                      |                 | 674 1095    | 987   |
| 1249                                        | 1239 1349                                              | 16.52171168     | 21.63956403 |       |

|                                     |                                             |             |                |                                     |
|-------------------------------------|---------------------------------------------|-------------|----------------|-------------------------------------|
| 20.49368413                         | 27.06849343                                 | 24.20083406 | 28.22659001    |                                     |
| ENSG00000140527                     | 0                                           | 0           | 14.06409511    | 8.224738897                         |
|                                     | 2.943646558                                 | 0           | 8.410826854    | -5.49165944                         |
| 0.010530887                         | 1                                           | WDR93       | 15             | 89690797                            |
|                                     | +                                           | 4068        | protein_coding | WD repeat domain                    |
|                                     |                                             |             |                | 93                                  |
| [Source:HGNC Symbol;Acc:HGNC:26924] |                                             |             | -              | 0                                   |
|                                     | 14                                          | 9           | 3              | 0                                   |
|                                     |                                             |             | 0              | 0                                   |
|                                     | 0.096409574                                 | 0.034425983 |                | 0.166398079                         |
| ENSG00000140511                     | 208.2531016                                 | 290.1357071 | 421.4311174    |                                     |
| 180.82408                           | 174.5472366                                 | 191.3370263 | 306.606642     |                                     |
| 182.2361143                         | 0.752080725                                 | 0.010550725 | 0.063224458    | HAPLN3                              |
|                                     | 15                                          | 88877288    | 88895626       | -                                   |
|                                     |                                             |             |                | 3524                                |
| protein_coding                      | hyaluronan and proteoglycan link protein 3  |             |                |                                     |
| [Source:HGNC Symbol;Acc:HGNC:21446] |                                             |             | -              | 180                                 |
|                                     | 180                                         | 191         | 195            | 2.793388353                         |
|                                     |                                             |             |                | 3.915997409                         |
| 5.665572824                         | 2.46966372                                  | 2.36187041  | 2.583120984    |                                     |
| ENSG00000103194                     | 3800.619105                                 | 3780.106752 | 3643.276899    |                                     |
| 4736.586317                         | 4689.928891                                 | 4412.526191 | 3741.334252    |                                     |
| 4613.0138                           | -0.302191332                                | 0.010551563 | 0.063224458    | USP10                               |
|                                     | 16                                          | 84699978    | 84779922       | +                                   |
|                                     |                                             |             |                | 5083                                |
| protein_coding                      | ubiquitin specific peptidase 10             |             |                | [Source:HGNC                        |
| Symbol;Acc:HGNC:12608]              |                                             |             | -              | 3285                                |
|                                     | 4497                                        | 35.34353437 | 35.37211837    | 4078                                |
|                                     |                                             |             |                | 3726                                |
|                                     |                                             |             |                | 4715                                |
| 44.85003681                         | 43.99720983                                 | 41.29988227 | 33.95667802    | 5132                                |
| ENSG00000196653                     | 84.45820233                                 | 103.8185278 | 56.71230814    |                                     |
| 183.8378146                         | 195.5660138                                 | 105.9712761 | 81.66301275    |                                     |
| 161.7917015                         | -0.98627256                                 | 0.010553917 | 0.063224458    | ZNF502                              |
|                                     | 3                                           | 44712643    | 44723831       | +                                   |
|                                     |                                             |             |                | 3273                                |
| protein_coding                      | zinc finger protein 502                     |             |                | [Source:HGNC                        |
| Symbol;Acc:HGNC:23718]              |                                             |             | zf-C2H2        | 73                                  |
|                                     | 108                                         | 1.219752081 | 1.508710717    | 112                                 |
|                                     |                                             |             |                | 58                                  |
|                                     |                                             |             |                | 183                                 |
| 2.703375048                         | 2.849222503                                 | 1.540365511 | 0.820889015    | 214                                 |
| ENSG00000013523                     | 413.0353182                                 | 432.8861828 | 464.4542477    |                                     |
| 636.9025928                         | 629.6494555                                 | 556.3491995 | 436.7919162    |                                     |
| 607.6337493                         | -0.475898911                                | 0.010554642 | 0.063224458    | ANGEL1                              |
|                                     | 14                                          | 76786178    | 76826246       | -                                   |
|                                     |                                             |             |                | 6414                                |
| protein_coding                      | angel homolog 1                             |             |                | [Source:HGNC Symbol;Acc:HGNC:19961] |
|                                     | -                                           | 357         | 467            | 475                                 |
|                                     |                                             |             |                | 634                                 |
|                                     |                                             |             |                | 689                                 |
|                                     |                                             |             |                | 567                                 |
| 3.04392518                          | 3.21012455                                  | 3.430576512 | 4.779269478    |                                     |
| 4.681110188                         | 4.126673785                                 |             |                |                                     |
| ENSG00000204580                     | 682.6073887                                 | 767.5155446 | 869.262792     |                                     |
| 976.4500318                         | 996.1072664                                 | 1175.496192 | 773.1285751    |                                     |
| 1049.351164                         | -0.440087349                                | 0.010562296 | 0.063245522    | DDR1                                |
|                                     | 6                                           | 30876421    | 30900156       | +                                   |
|                                     |                                             |             |                | 9122                                |
| protein_coding                      | discoidin domain receptor tyrosine kinase 1 |             |                |                                     |
| [Source:HGNC Symbol;Acc:HGNC:2730]  |                                             |             | -              | 590                                 |
|                                     | 972                                         | 1090        | 1198           | 3.537175893                         |
|                                     |                                             |             |                | 4.001973669                         |
| 4.51454669                          | 5.152018496                                 | 5.207089324 | 6.130738413    |                                     |
| ENSG00000261645                     | 3.470885027                                 | 6.488657986 | 0              | 25.11445555                         |
|                                     | 21.01877718                                 | 24.53038799 | 3.319847671    | 23.55454024                         |

|                                        |                                                         |             |             |              |             |
|----------------------------------------|---------------------------------------------------------|-------------|-------------|--------------|-------------|
|                                        | -2.820503228                                            | 0.010572087 | 0.063265762 | DISC1FP1     |             |
|                                        | 11                                                      | 90251204    | 90915052    | +            | 3175        |
| processed_transcript                   | DISC1 fusion partner 1                                  |             |             | [Source:HGNC |             |
| Symbol;Acc:HGNC:33625]                 | -                                                       | 3           | 7           | 0            | 25 23       |
|                                        | 25                                                      | 0.051674019 | 0.097204925 | 0            | 0.380712815 |
|                                        | 0.315676828                                             | 0.36757191  |             |              |             |
| ENSG00000269486                        | 20.82531016                                             | 27.80853423 | 16.62257307 |              |             |
| 61.27927154                            | 72.19493032                                             | 45.1359139  | 21.75213915 |              |             |
| 59.53670525                            | -1.451169125                                            | 0.010573953 | 0.063265762 |              |             |
| ERVK9-11                               | 19                                                      | 38935297    | 38938632    | -            | 3336        |
| lincRNA                                | "endogenous retrovirus group K9, member 11              |             |             |              |             |
| [Source:HGNC Symbol;Acc:HGNC:51160]"   | -                                                       | 18          | 30          |              | 17          |
|                                        | 61                                                      | 79          | 46          | 0.295080952  | 0.396487199 |
| 0.236061594                            | 0.884107367                                             | 1.031952356 | 0.643691576 |              |             |
| ENSG00000066557                        | 1311.99454                                              | 937.1476034 | 885.885365  |              |             |
| 621.8339194                            | 871.8223231                                             | 690.7757257 | 1045.00917  |              |             |
| 728.1439894                            | 0.520061894                                             | 0.010602223 | 0.063387504 |              | LRRC40      |
|                                        | 1                                                       | 70144805    | 70205620    | -            | 2884        |
| protein_coding                         | leucine rich repeat containing 40                       |             |             | [Source:HGNC |             |
| Symbol;Acc:HGNC:26004]                 | -                                                       | 1134        | 1011        | 906          | 619 954     |
|                                        | 704                                                     | 21.50366627 | 15.45574193 | 14.55242593  |             |
| 10.37759241                            | 14.41490274                                             | 11.39523901 |             |              |             |
| ENSG00000259865                        | 232.5492968                                             | 179.8285213 | 186.7594975 |              |             |
| 103.4715569                            | 124.2849433                                             | 124.614371  | 199.7124385 |              |             |
| 117.4569571                            | 0.764058489                                             | 0.010602593 | 0.063387504 |              |             |
| AL390728.6                             | 1                                                       | 247187281   | 247188526   | -            | 1246        |
| lincRNA                                | novel transcript                                        |             |             |              |             |
|                                        | 103                                                     | 136         | 127         | 8.822115267  | 6.864638087 |
| 7.100971682                            | 3.99687346                                              | 4.756411974 | 4.758079723 |              |             |
| ENSG00000105877                        | 113.3822442                                             | 174.2668145 | 100.7132369 |              |             |
| 304.3872013                            | 236.6897083                                             | 164.8442073 | 129.4540985 |              |             |
| 235.3070389                            | -0.860169347                                            | 0.010609402 | 0.063403412 |              | DNAH11      |
|                                        | 7                                                       | 21543215    | 21901839    | +            | 15998       |
| protein_coding                         | dynein axonemal heavy chain 11                          |             |             | [Source:HGNC |             |
| Symbol;Acc:HGNC:2942]                  | -                                                       | 98          | 188         | 103          | 303 259     |
|                                        | 168                                                     | 0.335007937 | 0.518114939 | 0.298245561  |             |
| 0.915752583                            | 0.705492936                                             | 0.490218419 |             |              |             |
| ENSG00000166106                        | 5.784808379                                             | 32.44328993 | 27.37835565 |              |             |
| 1.004578222                            | 0                                                       | 5.887293117 | 21.86881799 | 2.297290446  |             |
|                                        | 3.262880108                                             | 0.010617429 | 0.06342659  | ADAMTS15     |             |
|                                        | 11                                                      | 130448974   | 130476641   | +            | 5673        |
| protein_coding                         | ADAM metalloproteinase with thrombospondin type 1 motif |             |             |              |             |
| 15 [Source:HGNC Symbol;Acc:HGNC:16305] | -                                                       | 5           | 35          |              | 28          |
|                                        | 1                                                       | 0           | 6           | 0.048200543  | 0.272012723 |
| 0.228637627                            | 0.00852292                                              | 0           | 0.04937243  |              |             |
| ENSG00000125484                        | 1905.51588                                              | 1471.998412 | 1693.546857 |              |             |
| 2326.603162                            | 2203.316164                                             | 2060.552591 | 1690.353716 |              |             |
| 2196.823973                            | -0.37860252                                             | 0.010628328 | 0.063466892 |              | GTF3C4      |
|                                        | 9                                                       | 132670035   | 132694955   | +            | 9043        |
| protein_coding                         | general transcription factor IIIC subunit 4             |             |             |              |             |

|                                    |                                     |              |             |             |
|------------------------------------|-------------------------------------|--------------|-------------|-------------|
| [Source:HGNC Symbol;Acc:HGNC:4667] | -                                   | 1647         | 1588        | 1732        |
| 2316                               | 2411                                | 2100         | 9.960377099 | 7.742334403 |
| 8.872332573                        | 12.383039                           | 11.61831848  | 10.84058701 |             |
| ENSG00000172819                    | 91.39997238                         | 95.47596751  | 123.2026004 |             |
| 43.19686355                        | 64.8840513                          | 35.3237587   | 103.3595134 |             |
| 47.80155785                        | 1.1112569                           | 0.010659546  | 0.063628458 | RARG        |
| 12                                 | 53210567                            | 53232980     | -           | 5127        |
| protein_coding                     | retinoic acid receptor gamma        | [Source:HGNC |             |             |
| Symbol;Acc:HGNC:9866]              | THR-like                            | 79           | 103         | 126         |
| 71                                 | 36                                  | 0.842671851  | 0.885743278 | 1.138438786 |
| 0.405514469                        | 0.603467143                         | 0.327782089  |             |             |
| ENSG00000198455                    | 482.4530188                         | 550.6089777  | 460.543054  |             |
| 640.9209057                        | 740.2265007                         | 682.9260016  | 497.8683501 |             |
| 688.0244693                        | -0.466459704                        | 0.010669342  | 0.063662071 | ZXDB        |
| X                                  | 57591652                            | 57597545     | +           | 5894        |
| protein_coding                     | zinc finger X-linked duplicated B   | [Source:HGNC |             |             |
| Symbol;Acc:HGNC:13199]             | zf-C2H2                             | 417          | 594         | 471         |
| 696                                | 3.869195163                         | 4.443347419  | 3.701802389 | 810         |
| 5.233735416                        | 5.988712785                         | 5.512456101  |             |             |
| ENSG00000077684                    | 957.9642675                         | 885.2383395  | 1122.512582 |             |
| 750.4199319                        | 654.3236722                         | 779.0851225  | 988.5717296 |             |
| 727.9429088                        | 0.441753672                         | 0.010679436  | 0.063697437 | JADE1       |
| 4                                  | 128809623                           | 128875224    | +           | 9129        |
| protein_coding                     | jade family PHD finger 1            | [Source:HGNC |             |             |
| Symbol;Acc:HGNC:30027]             | -                                   | 828          | 955         | 1148        |
| 794                                | 4.960230317                         | 4.612263625  | 5.825338101 | 716         |
| 3.956385588                        | 3.41781391                          | 4.06016171   |             |             |
| ENSG00000122965                    | 628.2301899                         | 793.4701766  | 684.4588913 |             |
| 1160.287846                        | 892.8411002                         | 871.3193813  | 702.0530859 |             |
| 974.8161093                        | -0.472648759                        | 0.010684632  | 0.063703576 | RBM19       |
| 12                                 | 113816738                           | 113966371    | -           | 5912        |
| protein_coding                     | RNA binding motif protein 19        | [Source:HGNC |             |             |
| Symbol;Acc:HGNC:29098]             | -                                   | 543          | 856         | 700         |
| 888                                | 5.022964594                         | 6.38371217   | 5.484866614 | 977         |
| 9.446018142                        | 7.201429876                         | 7.011720181  |             |             |
| ENSG00000125347                    | 629.3871516                         | 660.9161634  | 704.0148596 |             |
| 375.712255                         | 510.8476715                         | 518.0817943  | 664.7727249 |             |
| 468.2139069                        | 0.505543915                         | 0.010705289  | 0.063801856 | IRF1        |
| 5                                  | 132481609                           | 132490798    | -           | 7799        |
| protein_coding                     | interferon regulatory factor 1      | [Source:HGNC |             |             |
| Symbol;Acc:HGNC:6116]              | IRF                                 | 544          | 713         | 720         |
| 528                                | 3.814649958                         | 4.030737979  | 4.2765744   | 559         |
| 2.318643067                        | 3.1234279                           | 3.160392613  |             |             |
| ENSG00000166987                    | 411.8783566                         | 691.5055511  | 849.7068236 |             |
| 1209.512179                        | 870.9084632                         | 911.5492176  | 651.0302438 |             |
| 997.3232867                        | -0.61397237                         | 0.010720377  | 0.063866874 | MBD6        |
| 12                                 | 57520710                            | 57530148     | +           | 5646        |
| protein_coding                     | methyl-CpG binding domain protein 6 | [Source:HGNC |             |             |
| Symbol;Acc:HGNC:20445]             | -                                   | 356          | 746         | 869         |
| 929                                | 3.44829043                          | 5.82548263   | 7.129865848 | 953         |

|                        |                                              |                |                          |             |          |      |
|------------------------|----------------------------------------------|----------------|--------------------------|-------------|----------|------|
| 10.31066863            | 7.355473321                                  | 7.68105502     |                          |             |          |      |
| ENSG00000186638        | 418.8201266                                  | 343.8988733    | 423.3867142              |             |          |      |
| 297.3551537            | 240.3451478                                  | 257.0784661    | 395.3685714              |             |          |      |
| 264.9262559            | 0.57747262                                   | 0.010741629    | 0.063966833              | KIF24       |          |      |
| 9                      | 34252381                                     | 34311371       | -                        | 6131        |          |      |
| protein_coding         | kinesin family member 24 [Source:HGNC        |                |                          |             |          |      |
| Symbol;Acc:HGNC:19916] | -                                            | 362            | 371                      | 433         | 296      | 263  |
| 262                    | 3.229029161                                  | 2.667943029    | 3.271591235              |             |          |      |
| 2.33432656             | 1.869317321                                  | 1.994876485    |                          |             |          |      |
| ENSG00000182919        | 535.6732559                                  | 496.8458115    | 346.1406393              |             |          |      |
| 672.0628305            | 630.5633154                                  | 691.7569412    | 459.5532356              |             |          |      |
| 664.7943624            | -0.533421089                                 | 0.010745524    | 0.063966833              |             |          |      |
| C11orf54               | 11                                           | 93741591       | 93764749                 | +           |          | 6269 |
| protein_coding         | chromosome 11 open reading frame 54          |                |                          |             |          |      |
| [Source:HGNC           | Symbol;Acc:HGNC:30204]                       | -              | 463                      | 536         |          | 354  |
| 669                    | 690                                          | 705            | 4.039033302              | 3.769645214 |          |      |
| 2.615817543            | 5.159754808                                  | 4.796334004    | 5.249728976              |             |          |      |
| ENSG00000156026        | 476.6682104                                  | 463.4755704    | 515.2997653              |             |          |      |
| 324.4787657            | 384.7350084                                  | 298.2895179    | 485.1478487              |             |          |      |
| 335.8344307            | 0.530218091                                  | 0.010754739    | 0.063996768              | MCU         |          |      |
| 10                     | 72692131                                     | 72887694       | +                        | 4533        |          |      |
| protein_coding         | mitochondrial calcium uniporter [Source:HGNC |                |                          |             |          |      |
| Symbol;Acc:HGNC:23526] | -                                            | 412            | 500                      | 527         | 323      | 421  |
| 304                    | 4.970570176                                  | 4.863156472    | 5.38551639               |             |          |      |
| 3.445228409            | 4.047202871                                  | 3.130645554    |                          |             |          |      |
| ENSG00000104946        | 1058.619933                                  | 1190.205265    | 1175.313696              |             |          |      |
| 1416.455293            | 1407.344211                                  | 1642.55478     | 1141.379631              |             |          |      |
| 1488.784761            | -0.382916492                                 | 0.010771473    | 0.064071401              |             |          |      |
| TBC1D17                | 19                                           | 49877425       | 49888749                 | +           | 4745     |      |
| protein_coding         | TBC1 domain family member 17 [Source:HGNC    |                |                          |             |          |      |
| Symbol;Acc:HGNC:25699] | -                                            | 915            | 1284                     | 1202        | 1410     | 1540 |
| 1674                   | 10.54580144                                  | 11.93061318    | 11.73466529              |             |          |      |
| 14.36759616            | 14.14305082                                  | 16.4689258     |                          |             |          |      |
| ENSG00000104327        | 15.04050178                                  | 5.561706845    | 3.911193665              | 0           |          |      |
| 0                      | 0                                            | 8.171134098    | 0                        | 5.519413863 |          |      |
| 0.0107776              | 1                                            | CALB1          | 8                        | 90058608    | 90095475 |      |
| -                      | 7138                                         | protein_coding | calbindin 1 [Source:HGNC |             |          |      |
| Symbol;Acc:HGNC:1434]  | -                                            | 13             | 6                        | 4           | 0        | 0    |
| 0                      | 0.099600501                                  | 0.037060277    | 0.025958877              | 0           |          |      |
| 0                      | 0                                            |                |                          |             |          |      |
| ENSG00000259642        | 9.255693406                                  | 6.488657986    | 16.62257307              |             |          |      |
| 53.24264577            | 47.52071363                                  | 21.58674143    | 10.78897482              |             |          |      |
| 40.78336694            | -1.91813709                                  | 0.010803438    | 0.0642299                | ST20-       |          |      |
| AS1                    | 15                                           | 79922771       | 79926993                 | +           | 4223     |      |
| antisense              | ST20 antisense RNA 1 [Source:HGNC            |                |                          |             |          |      |
| Symbol;Acc:HGNC:27521] | -                                            | 8              | 7                        | 17          | 53       | 52   |
| 22                     | 0.103600921                                  | 0.073082083    | 0.186479156              |             |          |      |
| 0.606814577            | 0.536587881                                  | 0.243191077    |                          |             |          |      |
| ENSG00000163257        | 1903.201957                                  | 1740.814243    | 1600.656007              |             |          |      |
| 2478.294474            | 2133.862814                                  | 2140.031048    | 1748.224069              |             |          |      |

|                                     |                                                 |                |                              |             |
|-------------------------------------|-------------------------------------------------|----------------|------------------------------|-------------|
| 2250.729445                         | -0.364714936                                    | 0.010806522    | 0.0642299                    | DCAF16      |
| 4                                   | 17800655                                        | 17810758       | - 4816                       |             |
| protein_coding                      | DDB1 and CUL4 associated factor 16 [Source:HGNC |                |                              |             |
| Symbol;Acc:HGNC:25987]              | -                                               | 1645 1878      | 1637 2467                    | 2335        |
| 2181                                | 18.67988236                                     | 17.19265972    | 15.74579732                  |             |
| 24.76759787                         | 21.12802998                                     | 21.14049846    |                              |             |
| ENSG00000207975                     | 0 0                                             | 0 0            | 22.84649694                  |             |
| 7.849724156                         | 0                                               | 10.2320737     | -5.776662048                 | 0.010811476 |
| 1                                   | MIR181B1                                        | 1              | 198858873                    | 198858982   |
| -                                   | 110                                             | miRNA          | microRNA 181b-1 [Source:HGNC |             |
| Symbol;Acc:HGNC:31550]              | -                                               | 0 0            | 0 0                          | 25          |
| 8                                   | 0 0                                             | 0 0            | 9.90389258                   |             |
| 3.395027822                         |                                                 |                |                              |             |
| ENSG00000167173                     | 760.1238209                                     | 891.7269975    | 880.0185745                  |             |
| 1237.64037                          | 1007.987445                                     | 1141.153649    | 843.9564643                  |             |
| 1128.927154                         | -0.418905923                                    | 0.010820981    | 0.064281984                  |             |
| C15orf39                            | 15                                              | 75195643       | 75212169                     | + 5812      |
| protein_coding                      | chromosome 15 open reading frame 39             |                |                              |             |
| [Source:HGNC Symbol;Acc:HGNC:24497] | -                                               | 657            | 962                          | 900         |
| 1232                                | 1103 1163                                       | 6.182077948    | 7.297656619                  |             |
| 7.173306036                         | 10.24911388                                     | 8.270057032    | 9.341145675                  |             |
| ENSG00000048991                     | 1073.660435                                     | 1047.454789    | 1294.605103                  |             |
| 985.4912358                         | 752.1066791                                     | 755.53595      | 1138.573442                  |             |
| 831.0446216                         | 0.454611552                                     | 0.010823695    | 0.064281984                  | R3HDM1      |
| 2                                   | 135531455                                       | 135725270      | + 7898                       |             |
| protein_coding                      | R3H domain containing 1 [Source:HGNC            |                |                              |             |
| Symbol;Acc:HGNC:9757]               | -                                               | 928 1130       | 1324 981                     | 823         |
| 770                                 | 6.425775666                                     | 6.308052106    | 7.765569511                  |             |
| 6.00555425                          | 4.540893367                                     | 4.551134093    |                              |             |
| ENSG00000125630                     | 3016.199089                                     | 3088.601201    | 2694.812435                  |             |
| 4008.267106                         | 3724.89286                                      | 3389.118404    | 2933.204242                  |             |
| 3707.426123                         | -0.337954645                                    | 0.010860306    | 0.064474367                  | POLR1B      |
| 2                                   | 112541915                                       | 112577150      | + 6329                       |             |
| protein_coding                      | RNA polymerase I subunit B [Source:HGNC         |                |                              |             |
| Symbol;Acc:HGNC:20454]              | -                                               | 2607 3332      | 2756 3990                    | 4076        |
| 3454                                | 22.52685939                                     | 23.21153464    | 20.17188917                  |             |
| 30.48168821                         | 28.06452379                                     | 25.47611927    |                              |             |
| ENSG00000146143                     | 1455.457788                                     | 1182.789656    | 1293.627305                  |             |
| 988.5049705                         | 1071.043776                                     | 909.5867865    | 1310.624916                  |             |
| 989.7118444                         | 0.404524402                                     | 0.010865685    | 0.064481258                  | PRIM2       |
| 6                                   | 57314805                                        | 57646849       | + 4667                       |             |
| protein_coding                      | DNA primase subunit 2 [Source:HGNC              |                |                              |             |
| Symbol;Acc:HGNC:9370]               | -                                               | 1258 1276      | 1323 984                     | 1172        |
| 927                                 | 14.74136002                                     | 12.05443422    | 13.13180724                  |             |
| 10.19432592                         | 10.94330261                                     | 9.272310559    |                              |             |
| ENSG00000256006                     | 0                                               | 17.61207168    | 11.73358099                  | 0 0         |
| 0                                   | 9.781884223                                     | 0              | 5.786887374                  | 0.010871734 |
| 1                                   | AC084117.1                                      | 11             | 18405609                     | 18406731    |
| +                                   | 270                                             | sense_intronic | novel transcript             | -           |
| 0                                   | 19 12                                           | 0 0            | 0 0                          |             |

|                            |                                                                                 |             |                |                       |               |             |
|----------------------------|---------------------------------------------------------------------------------|-------------|----------------|-----------------------|---------------|-------------|
| 3.102585759                | 2.058827392                                                                     | 0           | 0              | 0                     |               |             |
| ENSG00000153113            | 4539.917616                                                                     | 3690.192492 | 4347.291758    |                       |               |             |
| 3400.497282                | 3149.161138                                                                     | 3401.874206 | 4192.467288    |                       |               |             |
| 3317.177542                | 0.337699154                                                                     | 0.01090941  | 0.064715617    | CAST                  |               |             |
| 5                          | 96525267                                                                        | 96779595    | +              | 12448                 |               |             |
| protein_coding             | calpastatin [Source:HGNC Symbol;Acc:HGNC:1515]                                  |             |                |                       |               | -           |
| 3924                       | 3981                                                                            | 4446        | 3385           | 3446                  | 3467          | 17.2394788  |
|                            | 14.10024166                                                                     | 16.54521193 | 13.1480186     | 12.06352674           |               |             |
|                            | 13.0017047                                                                      |             |                |                       |               |             |
| ENSG00000139636            | 240.6480285                                                                     | 266.0349774 | 395.0305601    |                       |               |             |
| 192.8790186                | 188.2551347                                                                     | 174.6563625 | 300.5711887    |                       |               |             |
| 185.2635053                | 0.699007204                                                                     | 0.010916456 | 0.064732297    | LMBR1L                |               |             |
| 12                         | 49096551                                                                        | 49110900    | -              | 6047                  |               |             |
| protein_coding             | limb development membrane protein 1 like [Source:HGNC Symbol;Acc:HGNC:18268]    |             |                |                       |               | -           |
| 178                        | 1.881126836                                                                     | 2.092550203 | 3.09488027     |                       |               |             |
| 1.535191215                | 1.484519305                                                                     | 1.374124458 |                |                       |               |             |
| ENSG00000189266            | 2264.173999                                                                     | 1959.574712 | 2349.649594    |                       |               |             |
| 1489.789503                | 1845.083093                                                                     | 1720.070806 | 2191.132768    |                       |               |             |
| 1684.981134                | 0.378625164                                                                     | 0.010926299 | 0.06476554     | PNRC2                 |               |             |
| 1                          | 23956839                                                                        | 23963462    | +              | 2779                  |               |             |
| protein_coding             | proline rich nuclear receptor coactivator 2 [Source:HGNC Symbol;Acc:HGNC:23158] |             |                |                       |               | -           |
| 1483                       | 2019                                                                            | 1753        | 38.51208147    | 33.53902198           | 2403          |             |
| 40.05600936                | 25.80202673                                                                     | 31.65966899 | 29.44688804    |                       |               |             |
| ENSG00000277310            | 0                                                                               | 0.926951141 | 0              | 12.05493866           |               |             |
| 17.36333767                | 2.943646558                                                                     | 0.308983714 |                |                       |               |             |
| 10.78730763                | -4.890302455                                                                    | 0.01095778  | 1              | AC090246.1            |               |             |
| 18                         | 50256036                                                                        | 50256461    | -              | 426                   |               |             |
| sense_intronic             | "novel transcript, sense intronic to CCDC11"                                    |             |                |                       |               | -           |
| 0                          | 1                                                                               | 0           | 12             | 19                    | 3             | 0           |
| 0.103496189                | 0                                                                               | 1.36198669  | 1.943580797    | 0.328743891           |               |             |
| ENSG00000250786            | 83.30124065                                                                     | 59.32487301 | 95.82424478    |                       |               |             |
| 5.02289111                 | 29.24351608                                                                     | 43.17348286 | 79.48345282    |                       |               |             |
| 25.81329668                | 1.620384416                                                                     | 0.010991199 | 0.065124985    | SNHG18                |               |             |
| 5                          | 9546200                                                                         | 9550609     | +              | 1951                  | lincRNA small |             |
| nucleolar RNA host gene 18 | [Source:HGNC Symbol;Acc:HGNC:49007]                                             |             |                |                       |               | -           |
| 72                         | 64                                                                              | 98          | 5              | 32                    | 44            | 2.018226665 |
|                            | 1.44629426                                                                      | 2.326865402 | 0.123912167    | 0.714745297           |               |             |
|                            | 1.052789253                                                                     |             |                |                       |               |             |
| ENSG00000285077            | 10.41265508                                                                     | 5.561706845 | 7.822387329    | 0                     |               |             |
| 0                          | 0                                                                               | 7.932249752 | 0              | 5.478845828           |               |             |
| 0.011003208                | 1                                                                               | ARHGAP11B   | 15             | 30624494              |               |             |
| 30638805                   | +                                                                               | 2337        | protein_coding | Rho GTPase activating |               |             |
| protein 11B                | [Source:HGNC Symbol;Acc:HGNC:15782]                                             |             |                |                       |               | -           |
| 8                          | 0                                                                               | 0           | 0              | 0.210609768           | 0.113194805   |             |
|                            | 0.158574639                                                                     | 0           | 0              | 0                     |               |             |
| ENSG00000173227            | 18.51138681                                                                     | 2.780853423 | 3.911193665    | 0                     |               |             |
| 0                          | 0                                                                               | 8.401144633 | 0              | 5.557770757           |               |             |
| 0.011019432                | 1                                                                               | SYT12       | 11             | 67006778              | 67050863      |             |

|                                          |                                            |              |                |                  |              |        |
|------------------------------------------|--------------------------------------------|--------------|----------------|------------------|--------------|--------|
|                                          | +                                          | 10830        | protein_coding | synaptotagmin 12 | [Source:HGNC |        |
| Symbol;Acc:HGNC:18381]                   | -                                          | 16           | 3              | 4                | 0            | 0      |
| 0                                        | 0.080795326                                | 0.012213124  | 0.017109369    | 0                | 0            |        |
| 0                                        | 0                                          |              |                |                  |              |        |
| ENSG00000176894                          | 93.71389573                                | 107.5263323  | 171.1147228    |                  |              |        |
| 77.3525231                               | 38.38211485                                | 58.87293117  | 124.118317     |                  |              |        |
| 58.20252304                              | 1.095496601                                | 0.011059638  | 0.065505107    |                  |              | PXMP2  |
| 12                                       | 132687606                                  | 132704991    | + 1408         |                  |              |        |
| protein_coding                           | peroxisomal membrane protein 2             | [Source:HGNC |                |                  |              |        |
| Symbol;Acc:HGNC:9716]                    | -                                          | 81           | 116            | 175              | 77           | 42     |
| 60                                       | 3.146132991                                | 3.632363411  | 5.757551743    |                  |              |        |
| 2.644169472                              | 1.299885901                                | 1.989274115  |                |                  |              |        |
| ENSG00000099814                          | 813.344058                                 | 1154.981121  | 1063.844677    |                  |              |        |
| 1259.74109                               | 1310.475064                                | 1581.719417  | 1010.723285    |                  |              |        |
| 1383.978524                              | -0.452540673                               | 0.011068692  | 0.065533341    |                  |              |        |
| CEP170B 14                               | 104865280                                  | 104896770    | + 7199         |                  |              |        |
| protein_coding                           | centrosomal protein 170B                   | [Source:HGNC |                |                  |              |        |
| Symbol;Acc:HGNC:20362]                   | -                                          | 703          | 1246           | 1088             | 1254         | 1434   |
| 1612                                     | 5.340450134                                | 7.630971415  | 7.000985491    |                  |              |        |
| 8.422219958                              | 8.680316798                                | 10.45295064  |                |                  |              |        |
| ENSG00000120942                          | 1377.941356                                | 1351.494763  | 1315.13887     |                  |              |        |
| 1776.094297                              | 1658.655678                                | 1704.371357  | 1348.191663    |                  |              |        |
| 1713.040444                              | -0.345571195                               | 0.01108201   | 0.065586794    |                  |              | UBIAD1 |
| 1                                        | 11273206                                   | 11296049     | + 5082         |                  |              |        |
| protein_coding                           | UbiA prenyltransferase domain containing 1 | [Source:HGNC |                |                  |              |        |
| Symbol;Acc:HGNC:30791]                   | -                                          | 1191         | 1458           |                  |              | 1345   |
| 1768                                     | 1815 1737                                  | 12.81656999  | 12.64901831    |                  |              |        |
| 12.25998897                              | 16.82088402                                | 15.56325977  | 15.95552848    |                  |              |        |
| ENSG00000123975                          | 1033.166776                                | 1106.779662  | 1166.51351     |                  |              |        |
| 781.5618567                              | 903.8074188                                | 820.2961743  | 1102.153316    |                  |              |        |
| 835.2218166                              | 0.400147572                                | 0.011091763  | 0.065619111    |                  |              | CKS2   |
| 9                                        | 89311198                                   | 89316703     | + 613          |                  |              |        |
| protein_coding                           | CDC28 protein kinase regulatory subunit 2  | [Source:HGNC |                |                  |              |        |
| Symbol;Acc:HGNC:2000]                    | -                                          | 893          | 1194           | 1193             | 778          | 989    |
| 836                                      | 79.66832697                                | 85.87718701  | 90.15346535    |                  |              |        |
| 61.36494354                              | 70.30632782                                | 63.66369464  |                |                  |              |        |
| ENSG00000117152                          | 876.9769502                                | 531.1430037  | 823.3062664    |                  |              |        |
| 503.2936892                              | 316.1955176                                | 601.4851134  | 743.8087401    |                  |              |        |
| 473.6581068                              | 0.650953174                                | 0.011118471  | 0.065751671    |                  |              | RGS4   |
| 1                                        | 163068775                                  | 163076802    | + 4836         |                  |              |        |
| protein_coding                           | regulator of G protein signaling 4         | [Source:HGNC |                |                  |              |        |
| Symbol;Acc:HGNC:10000]                   | -                                          | 758          | 573            | 842              | 501          | 346    |
| 613                                      | 8.571910466                                | 5.223989409  | 8.065443535    |                  |              |        |
| 5.009018667                              | 3.117801089                                | 5.917254085  |                |                  |              |        |
| ENSG00000245025                          | 5.784808379                                | 18.53902282  | 12.71137941    |                  |              |        |
| 1.004578222                              | 0                                          | 0.981215519  | 12.3450702     | 0.661931247      |              |        |
| 4.246653784                              | 0.01116988                                 | 1            | AC107959.1     | 8                |              |        |
| 22984596                                 | 23019335                                   | -            | 2268           | antisense        |              |        |
| "novel transcript, antisense to RH0BTB2" |                                            |              |                | -                |              | 5      |
| 20                                       | 13                                         | 1            | 0              | 1                | 0.120565116  |        |



|                                      |                                             |                                     |             |                |                        |
|--------------------------------------|---------------------------------------------|-------------------------------------|-------------|----------------|------------------------|
| 0.388795208                          | 0.265523374                                 | 0.021318575                         | 0           | 0.02058273     |                        |
| ENSG00000179046                      | 519.4757924                                 | 558.9515379                         | 205.3376674 |                |                        |
| 772.5206527                          | 1348.857179                                 | 900.7558469                         | 427.9216659 |                |                        |
| 1007.377893                          | -1.235414925                                | 0.011193919                         | 0.066172251 |                | TRIML2                 |
| 4                                    | 188091273                                   | 188109603                           | -           | 3050           |                        |
| protein_coding                       | tripartite motif family like 2              |                                     |             |                |                        |
| [Source:HGNC Symbol;Acc:HGNC:26378]  | -                                           | 449                                 | 603         | 210            | 769                    |
| 918                                  | 8.050840347                                 | 8.716686583                         | 3.189494894 |                | 1476                   |
| 12.19067398                          | 21.08847212                                 | 14.05040613                         |             |                |                        |
| ENSG00000164163                      | 4865.023846                                 | 4392.821456                         | 4280.801466 |                |                        |
| 3532.097029                          | 3912.234135                                 | 3344.963706                         | 4512.882256 |                |                        |
| 3596.431623                          | 0.327276137                                 | 0.011203804                         | 0.066205083 |                | ABCE1                  |
| 4                                    | 145097932                                   | 145129179                           | +           | 6265           |                        |
| protein_coding                       | ATP binding cassette subfamily E member 1   |                                     |             |                |                        |
| [Source:HGNC Symbol;Acc:HGNC:69]     | -                                           | 4205                                | 4739        | 4378           | 3516                   |
| 3409                                 | 36.70621783                                 | 33.35028821                         | 32.37107617 |                | 4281                   |
| 27.13494887                          | 29.77712405                                 | 25.4010671                          |             |                |                        |
| ENSG00000247626                      | 386.4251997                                 | 543.1933685                         | 451.7428683 |                |                        |
| 664.0262048                          | 654.3236722                                 | 632.8840101                         | 460.4538122 |                |                        |
| 650.4112957                          | -0.496886861                                | 0.011223874                         | 0.066298054 |                | MARS2                  |
| 2                                    | 197705369                                   | 197708387                           | +           | 3019           |                        |
| protein_coding                       | "methionyl-tRNA synthetase 2, mitochondrial |                                     |             |                |                        |
| [Source:HGNC Symbol;Acc:HGNC:25133]" | -                                           |                                     | 334         | 586            | 462                    |
| 661                                  | 716                                         | 645                                 | 6.050316121 | 8.557924702    |                        |
| 7.08894029                           | 10.58618704                                 | 10.33495303                         | 9.97338622  |                |                        |
| ENSG00000233461                      | 54.37719876                                 | 81.57170039                         | 68.44588913 |                |                        |
| 9.041203998                          | 40.20983461                                 | 20.60552591                         | 68.13159609 |                |                        |
| 23.2855215                           | 1.545527388                                 | 0.011235079                         | 0.066338608 |                |                        |
| AL445524.1                           | 1                                           | 231522388                           | 231528556   | -              | 1021                   |
| antisense                            | novel transcript                            |                                     |             |                |                        |
| 70                                   | 9                                           | 44                                  | 21          | 2.517484635    | 3.800063799            |
| 3.175958023                          | 0.426204454                                 | 1.877956517                         | 0.96015111  |                |                        |
| ENSG00000130762                      | 19.66834849                                 | 9.269511408                         | 15.64477466 | 0              |                        |
| 0                                    | 2.943646558                                 | 14.86087818                         | 0.981215519 |                |                        |
| 3.929165938                          | 0.011250383                                 | 1                                   | ARHGEF16    | 1              |                        |
| 3454426                              | 3481113                                     | +                                   | 5563        | protein_coding | Rho guanine nucleotide |
| exchange factor                      | 16                                          | [Source:HGNC Symbol;Acc:HGNC:15515] | -           | 17             |                        |
| 10                                   | 16                                          | 0                                   | 0           | 3              | 0.167122366            |
| 0.079254677                          | 0.133233482                                 | 0                                   | 0           | 0.025174348    |                        |
| ENSG00000272948                      | 0                                           | 0                                   | 7.822387329 | 39.17855066    |                        |
| 24.67421669                          | 10.79337071                                 | 2.607462443                         |             |                |                        |
| 24.88204602                          | -3.237774789                                | 0.011259656                         | 0.066458056 |                |                        |
| AP001412.1                           | 21                                          | 37267784                            | 37268497    | +              | 714                    |
| antisense                            | "novel transcript, antisense to DSCR3"      |                                     |             |                |                        |
| 0                                    | 0                                           | 8                                   | 39          | 27             | 11                     |
| 0.519032116                          | 2.640995199                                 | 1.647874564                         | 0.719184815 |                |                        |
| ENSG00000173915                      | 1465.870443                                 | 1466.436705                         | 1492.120383 |                |                        |
| 639.9163274                          | 1245.591013                                 | 1152.928235                         | 1474.809177 |                |                        |
| 1012.811859                          | 0.54182403                                  | 0.011264944                         | 0.066463602 |                | ATP5MD                 |
| 10                                   | 103389041                                   | 103396492                           | -           | 924            |                        |

|                                                         |                               |              |                        |                    |             |             |  |
|---------------------------------------------------------|-------------------------------|--------------|------------------------|--------------------|-------------|-------------|--|
| protein_coding                                          | ATP synthase membrane subunit | DAPIT        | [Source:HGNC           |                    |             |             |  |
| Symbol;Acc:HGNC:30889]                                  | -                             | 1267         | 1582                   | 1526               | 637         | 1363        |  |
| 1175                                                    | 74.9893098                    | 75.48635687  | 76.50415421            |                    |             |             |  |
| 33.33256062                                             | 64.28097899                   | 59.36246564  |                        |                    |             |             |  |
| ENSG00000258982                                         | 9.255693406                   | 6.488657986  | 7.822387329            | 0                  |             |             |  |
| 0                                                       | 0                             | 7.855579574  | 0                      | 5.465592174        |             |             |  |
| 0.011277                                                | 1                             | AL133523.1   | 14                     | 100207407          |             |             |  |
| 100238555                                               | -                             | 331          | antisense              | "novel transcript, |             |             |  |
| antisense to YY1"                                       | -                             | 8            | 7                      | 8                  | 0           | 0           |  |
| 0                                                       | 1.321772482                   | 0.932403734  | 1.11960402             | 0                  |             |             |  |
| 0                                                       | 0                             |              |                        |                    |             |             |  |
| ENSG00000110880                                         | 6417.666415                   | 4856.297027  | 5425.803411            |                    |             |             |  |
| 3921.873379                                             | 4518.123234                   | 4572.464321  | 5566.588951            |                    |             |             |  |
| 4337.486978                                             | 0.359694015                   | 0.011315335  | 0.066735159            | COR01C             |             |             |  |
| 12                                                      | 108645109                     | 108731596    | -                      | 6532               |             |             |  |
| protein_coding                                          | coronin 1C                    | [Source:HGNC | Symbol;Acc:HGNC:2254]  | -                  |             |             |  |
| 5547                                                    | 5239                          | 5549         | 3904                   | 4944               | 4660        | 46.44154963 |  |
| 35.36194793                                             | 39.35238012                   | 28.89780455  | 32.98305536            |                    |             |             |  |
| 33.3031855                                              |                               |              |                        |                    |             |             |  |
| ENSG00000225222                                         | 0                             | 0            | 0.977798416            | 20.09156444        | 0           |             |  |
| 18.64309487                                             | 0.325932805                   | 12.9115531   | -5.147136247           |                    |             |             |  |
| 0.011321159                                             | 1                             | CHCHD4P5     | 1                      | 246178778          |             |             |  |
| 246179204                                               | +                             | 427          | processed_pseudogene   |                    |             |             |  |
| coiled-coil-helix-coiled-coil-helix domain containing 4 | pseudogene 5                  |              |                        |                    |             |             |  |
| [Source:HGNC                                            | Symbol;Acc:HGNC:44493]        | -            | 0                      | 0                  | 1           |             |  |
| 20                                                      | 0                             | 19           | 0                      | 0                  | 0.108486221 |             |  |
| 2.264661709                                             | 0                             | 2.077168662  |                        |                    |             |             |  |
| ENSG00000196535                                         | 509.0631373                   | 761.0268866  | 812.5504838            |                    |             |             |  |
| 976.4500318                                             | 811.5075711                   | 1286.373546  | 694.2135026            |                    |             |             |  |
| 1024.77705                                              | -0.560664781                  | 0.011336733  | 0.066835569            | MY018A             |             |             |  |
| 17                                                      | 29071124                      | 29180412     | -                      | 15047              |             |             |  |
| protein_coding                                          | myosin XVIIIIA                | [Source:HGNC | Symbol;Acc:HGNC:31104] |                    |             |             |  |
| -                                                       | 440                           | 821          | 831                    | 972                | 888         | 1311        |  |
| 1.599180437                                             | 2.405620932                   | 2.558312299  | 3.123327755            |                    |             |             |  |
| 2.571707921                                             | 4.067230696                   |              |                        |                    |             |             |  |
| ENSG00000259953                                         | 4.627846703                   | 7.415609127  | 11.73358099            | 0                  |             |             |  |
| 0                                                       | 0                             | 7.925678941  | 0                      | 5.481198169        |             |             |  |
| 0.011346258                                             | 1                             | AL138756.1   | 9                      | 112032555          |             |             |  |
| 112037730                                               | -                             | 4836         | sense_overlapping      | "novel             |             |             |  |
| transcript, overlapping                                 | SUSD1"                        | -            | 4                      | 8                  | 12          | 0           |  |
| 0                                                       | 0                             | 0.045234356  | 0.07293528             | 0.114946939        |             |             |  |
| 0                                                       | 0                             |              |                        |                    |             |             |  |
| ENSG00000250362                                         | 9.255693406                   | 7.415609127  | 6.844588913            | 0                  |             |             |  |
| 0                                                       | 0                             | 7.838630482  | 0                      | 5.462619892        |             |             |  |
| 0.011363096                                             | 1                             | AC008592.1   | 5                      | 95861786           |             |             |  |
| 95874519                                                | +                             | 850          | processed_transcript   | novel              |             |             |  |
| transcript                                              | -                             | 8            | 8                      | 7                  | 0           | 0           |  |
| 0                                                       | 0.514713755                   | 0.414958838  | 0.381488605            | 0                  | 0           |             |  |
| 0                                                       |                               |              |                        |                    |             |             |  |
| ENSG00000075643                                         | 204.7822166                   | 136.2618177  | 241.5162088            |                    |             |             |  |

|                                   |                                         |                                     |                |             |
|-----------------------------------|-----------------------------------------|-------------------------------------|----------------|-------------|
| 110.5036044                       | 112.4047649                             | 105.9712761                         | 194.1867477    |             |
| 109.6265485                       | 0.823930282                             | 0.011395319                         | 0.067155067    | MOCOS       |
| 18                                | 36187519                                | 36272157                            | + 6281         |             |
| protein_coding                    | molybdenum cofactor sulfurase           | [Source:HGNC                        |                |             |
| Symbol;Acc:HGNC:18234]            | -                                       | 177 147                             | 247 110        | 123         |
| 108                               | 1.541129685                             | 1.031864091                         | 1.821673815    |             |
| 0.846769308                       | 0.853365175                             | 0.802677331                         |                |             |
| ENSG00000169213                   | 1232.164185                             | 972.3717467                         | 1366.962186    |             |
| 826.7678767                       | 595.8366401                             | 1037.144804                         | 1190.499372    |             |
| 819.9164403                       | 0.538157074                             | 0.011401169                         | 0.067163648    | RAB3B       |
| 1                                 | 51907956                                | 51990764                            | - 12844        |             |
| protein_coding                    | "RAB3B, member RAS oncogene family      | [Source:HGNC                        |                |             |
| Symbol;Acc:HGNC:9778]"            | -                                       | 1065 1049                           | 1398 823       | 652         |
| 1057                              | 4.534652624                             | 3.600884151                         | 5.042075335    |             |
| 3.098137973                       | 2.212105811                             | 3.841675927                         |                |             |
| ENSG00000116288                   | 2459.700523                             | 2905.991827                         | 3173.933659    |             |
| 2090.52728                        | 2026.027348                             | 2454.020014                         | 2846.542003    |             |
| 2190.191547                       | 0.378473632                             | 0.011416752                         | 0.06722954     | PARK7       |
| 1                                 | 7954291 7985505 +                       | 2397                                | protein_coding |             |
| Parkinsonism associated deglycase | [Source:HGNC                            | Symbol;Acc:HGNC:16369]              |                |             |
| -                                 | 2126 3135                               | 3246 2081                           | 2217 2501      |             |
| 48.50538308                       | 57.66382794                             | 62.73110494                         | 41.97640706    |             |
| 40.30475233                       | 48.70703505                             |                                     |                |             |
| ENSG00000279349                   | 5.784808379                             | 12.05036483                         | 5.866790497    | 0           |
| 0                                 | 0                                       | 7.900654569                         | 0              | 5.476733519 |
| 0.011427142                       | 1                                       | AC092692.1                          | 3              | 112525548   |
| 112528142                         | -                                       | 2595                                | TEC            | TEC         |
| 6                                 | 0                                       | 0                                   | 0              | 0.105372517 |
| 0.107106627                       | 0                                       | 0                                   | 0              | 0.220871636 |
| ENSG00000134545                   | 0                                       | 0                                   | 0              | 24.67421669 |
| 5.887293117                       | 0                                       | 10.18716994                         | -5.770504688   | 0.01146573  |
| 1                                 | KLRC1                                   | 12                                  | 10442264       | 10454685    |
| 2698                              | protein_coding                          | killer cell lectin like receptor C1 |                |             |
| [Source:HGNC                      | Symbol;Acc:HGNC:6374]                   | -                                   | 0              | 0           |
| 0                                 | 27                                      | 6                                   | 0              | 0           |
| 0.436094306                       | 0.10381386                              |                                     |                |             |
| ENSG00000198887                   | 1699.576702                             | 1529.469382                         | 1494.07598     |             |
| 1261.750247                       | 1140.497127                             | 1260.861943                         | 1574.374021    |             |
| 1221.036439                       | 0.36649005                              | 0.0114687                           | 0.067509442    | SMC5        |
| 9                                 | 70258962                                | 70354888                            | + 6637         |             |
| protein_coding                    | structural maintenance of chromosomes 5 | [Source:HGNC                        |                |             |
| Symbol;Acc:HGNC:20465]            | -                                       | 1469 1650                           | 1528 1256      | 1248        |
| 1285                              | 12.10443969                             | 10.96089669                         | 10.66483136    |             |
| 9.149956687                       | 8.194101995                             | 9.038104239                         |                |             |
| ENSG00000090905                   | 1780.564019                             | 1609.187181                         | 1829.460837    |             |
| 1496.821551                       | 1070.129916                             | 1354.077417                         | 1739.737345    |             |
| 1307.009628                       | 0.412781418                             | 0.011495385                         | 0.067630833    | TNRC6A      |
| 16                                | 24610209                                | 24827632                            | + 12924        |             |
| protein_coding                    | trinucleotide repeat containing         | 6A [Source:HGNC                     |                |             |
| Symbol;Acc:HGNC:11969]            | -                                       | 1539 1736                           | 1871 1490      | 1171        |

|                 |                                                                                   |             |             |        |
|-----------------|-----------------------------------------------------------------------------------|-------------|-------------|--------|
| 1380            | 6.512329756                                                                       | 5.922249903 | 6.706243123 |        |
| 5.574302535     | 3.948376364                                                                       | 4.984575435 |             |        |
| ENSG00000234745 | 1867.336145                                                                       | 2671.473188 | 2466.985404 |        |
| 1014.624004     | 1877.982048                                                                       | 1898.65203  | 2335.264912 |        |
| 1597.086028     | 0.548226388                                                                       | 0.011498171 | 0.067630833 | HLA-B  |
| 6               | 31269491                                                                          | 31357188    | - 3051      |        |
| protein_coding  | "major histocompatibility complex, class I, B [Source:HGNC Symbol;Acc:HGNC:4932]" |             |             |        |
|                 | -                                                                                 | 1614        | 2882        | 2523   |
| 1010            | 2055 1935                                                                         | 28.93050639 | 41.64719217 |        |
| 38.30694328     | 16.00591044                                                                       | 29.35135913 | 29.60634513 |        |
| ENSG00000006007 | 1433.475516                                                                       | 1283.82733  | 1292.649506 |        |
| 907.1341345     | 1095.717993                                                                       | 1053.825468 | 1336.650784 |        |
| 1018.892532     | 0.391099424                                                                       | 0.011503701 | 0.067637339 | GDE1   |
| 16              | 19501689                                                                          | 19522145    | - 4416      |        |
| protein_coding  | glycerophosphodiester phosphodiesterase 1 [Source:HGNC Symbol;Acc:HGNC:29644]     |             |             |        |
|                 | -                                                                                 | 1239 1385   | 1322 903    | 1199   |
| 1074            | 15.34394222                                                                       | 13.82785022 | 13.86771304 |        |
| 9.886894548     | 11.83174269                                                                       | 11.35327748 |             |        |
| ENSG00000004776 | 115.6961676                                                                       | 52.83621503 | 192.626288  |        |
| 22.10072088     | 73.10879019                                                                       | 44.15469838 | 120.3862235 |        |
| 46.45473648     | 1.370939306                                                                       | 0.011524008 | 0.067730685 | HSPB6  |
| 19              | 35754569                                                                          | 35758079    | - 1721      |        |
| protein_coding  | heat shock protein family B (small) member 6 [Source:HGNC Symbol;Acc:HGNC:26511]  |             |             |        |
|                 | -                                                                                 | 100         | 57          | 197    |
| 22              | 80 45                                                                             | 3.17770694  | 1.460252449 |        |
| 5.302587108     | 0.618077632                                                                       | 2.02566542  | 1.220612124 |        |
| ENSG00000127837 | 2202.855031                                                                       | 2805.881103 | 2423.962274 |        |
| 2997.661415     | 3018.479175                                                                       | 3597.136094 | 2477.566136 |        |
| 3204.425561     | -0.37078799                                                                       | 0.011532323 | 0.067753507 | AAMP   |
| 2               | 218264123                                                                         | 218270257   | - 3140      |        |
| protein_coding  | angio associated migratory cell protein [Source:HGNC Symbol;Acc:HGNC:18]          |             |             |        |
|                 | -                                                                                 | 1904 3027   | 2479 2984   | 3303   |
| 3666            | 33.16133521                                                                       | 42.50272067 | 36.5720525  |        |
| 45.94839937     | 45.83925212                                                                       | 54.50154935 |             |        |
| ENSG00000142784 | 1225.222415                                                                       | 1300.512451 | 1546.877094 |        |
| 1811.254534     | 1795.734659                                                                       | 1685.728262 | 1357.53732  |        |
| 1764.239152     | -0.377731686                                                                      | 0.01155473  | 0.06785907  | WDTC1  |
| 1               | 27234516                                                                          | 27308633    | + 6024      |        |
| protein_coding  | WD and tetratricopeptide repeats 1 [Source:HGNC Symbol;Acc:HGNC:29175]            |             |             |        |
|                 | -                                                                                 | 1059 1403   | 1582 1803   | 1965   |
| 1718            | 9.614035239                                                                       | 10.26849192 | 12.16533217 |        |
| 14.47144772     | 14.21465061                                                                       | 13.31325444 |             |        |
| ENSG00000172986 | 541.4580642                                                                       | 378.1960655 | 475.2100303 |        |
| 323.4741875     | 341.7835942                                                                       | 272.7779144 | 464.95472   |        |
| 312.6785654     | 0.571078061                                                                       | 0.011569692 | 0.067895731 | GXYLT2 |
| 3               | 72888073                                                                          | 72998138    | + 3667      |        |
| protein_coding  | glucoside xylosyltransferase 2 [Source:HGNC Symbol;Acc:HGNC:33383]                |             |             |        |
|                 | -                                                                                 | 468 408     | 486 322     | 374    |
| 278             | 6.979585888                                                                       | 4.905499221 | 6.139426651 |        |
| 4.245669444     | 4.444462948                                                                       | 3.538994778 |             |        |

|                 |                                                        |             |             |             |                 |                          |
|-----------------|--------------------------------------------------------|-------------|-------------|-------------|-----------------|--------------------------|
| ENSG00000271303 | 104.1265508                                            | 223.3952249 | 115.3802131 |             |                 |                          |
| 199.9110662     | 207.4461922                                            | 458.2276476 | 147.6339963 |             |                 |                          |
| 288.528302      | -0.964101534                                           | 0.011572115 | 0.067895731 | SRXN1       |                 |                          |
| 20              | 646615                                                 | 653370      | -           | 2698        | protein_coding  |                          |
| sulfiredoxin 1  | [Source:HGNC Symbol;Acc:HGNC:16132]                    |             |             |             | -               | 90                       |
| 241             | 118                                                    | 199         | 227         | 467         | 1.824295878     |                          |
| 3.938302356     | 2.026014353                                            | 3.566254622 | 3.666422502 |             |                 |                          |
| 8.0801788       |                                                        |             |             |             |                 |                          |
| ENSG00000168056 | 2010.799392                                            | 1433.993415 | 3423.272255 |             |                 |                          |
| 1317.002049     | 880.9609218                                            | 1173.533761 | 2289.355021 |             |                 |                          |
| 1123.832244     | 1.026584937                                            | 0.011574297 | 0.067895731 | LTBP3       |                 |                          |
| 11              | 65538805                                               | 65558930    | -           | 10298       |                 |                          |
| protein_coding  | latent transforming growth factor beta binding protein |             |             |             |                 |                          |
| 3               | [Source:HGNC Symbol;Acc:HGNC:6716]                     |             |             |             | -               | 1738 1547 3501           |
| 1311            | 964                                                    | 1196        | 9.229785271 | 6.623253599 |                 |                          |
| 15.74859009     | 6.155325456                                            | 4.079272749 | 5.421560743 |             |                 |                          |
| ENSG00000131149 | 2754.72575                                             | 2698.354771 | 3445.761619 |             |                 |                          |
| 2421.033515     | 2131.121234                                            | 2344.123876 | 2966.280713 |             |                 |                          |
| 2298.759542     | 0.367969802                                            | 0.011591342 | 0.067969636 | GSE1        |                 |                          |
| 16              | 85169525                                               | 85676204    | +           | 13387       |                 |                          |
| protein_coding  | Gse1 coiled-coil protein [Source:HGNC                  |             |             |             |                 |                          |
|                 | Symbol;Acc:HGNC:28979]                                 |             |             |             | -               | 2381 2911 3524 2410 2332 |
| 2389            | 9.726819231                                            | 9.587224563 | 12.19424994 |             |                 |                          |
| 8.704322944     | 7.591085455                                            | 8.330650644 |             |             |                 |                          |
| ENSG00000148700 | 514.8479457                                            | 559.8784891 | 721.6152311 |             |                 |                          |
| 413.8862275     | 362.8023713                                            | 465.0961562 | 598.7805553 |             |                 |                          |
| 413.9282517     | 0.533489892                                            | 0.011605063 | 0.068014548 | ADD3        |                 |                          |
| 10              | 109996368                                              | 110135565   | +           | 6541        |                 |                          |
| protein_coding  | adducin 3 [Source:HGNC Symbol;Acc:HGNC:245]            |             |             |             | -               |                          |
| 445             | 604                                                    | 738         | 412         | 397         | 474 3.720579378 |                          |
| 4.0712404       | 5.226544693                                            | 3.045469703 | 2.644873805 |             |                 |                          |
| 3.382830428     |                                                        |             |             |             |                 |                          |
| ENSG00000091409 | 735.8276258                                            | 581.1983653 | 694.2368755 |             |                 |                          |
| 470.1426079     | 439.566601                                             | 529.8563805 | 670.4209555 |             |                 |                          |
| 479.8551965     | 0.481997261                                            | 0.011613418 | 0.068014548 | ITGA6       |                 |                          |
| 2               | 172427354                                              | 172506282   | +           | 6533        |                 |                          |
| protein_coding  | integrin subunit alpha 6 [Source:HGNC                  |             |             |             |                 |                          |
|                 | Symbol;Acc:HGNC:6142]                                  |             |             |             | -               | 636 627 710 468 481      |
| 540             | 5.324013772                                            | 4.231446367 | 5.034404957 |             |                 |                          |
| 3.463653278     | 3.20841853                                             | 3.8585767   |             |             |                 |                          |
| ENSG00000144730 | 769.3795144                                            | 575.6366585 | 474.2322318 |             |                 |                          |
| 698.1818643     | 1071.957636                                            | 910.5680021 | 606.4161349 |             |                 |                          |
| 893.5691675     | -0.560672969                                           | 0.011618238 | 0.068014548 | IL17RD      |                 |                          |
| 3               | 57089982                                               | 57170306    | -           | 9561        |                 |                          |
| protein_coding  | interleukin 17 receptor D [Source:HGNC                 |             |             |             |                 |                          |
|                 | Symbol;Acc:HGNC:17616]                                 |             |             |             | -               | 665 621 485 695 1173     |
| 928             | 3.803759411                                            | 2.863665187 | 2.349853981 |             |                 |                          |
| 3.514655016     | 5.346299591                                            | 4.530964858 |             |             |                 |                          |
| ENSG00000260941 | 149.2480562                                            | 123.2845017 | 94.84644637 |             |                 |                          |
| 160.7325155     | 228.4649694                                            | 253.153604  | 122.4596681 |             |                 |                          |

|                                         |                                                       |                 |                    |             |        |
|-----------------------------------------|-------------------------------------------------------|-----------------|--------------------|-------------|--------|
| 214.1170296                             | -0.808409172                                          | 0.011618551     | 0.068014548        |             |        |
| LINC00622                               | 1                                                     | 119597702       | 119599271          | -           | 1570   |
|                                         | sense_overlapping                                     | long intergenic | non-protein coding | RNA         |        |
| 622 [Source:HGNC Symbol;Acc:HGNC:44251] | -                                                     |                 | 129                | 133         | 97     |
| 160                                     | 250                                                   | 258             | 4.493500255        | 3.734959927 |        |
| 2.862032345                             | 4.927442292                                           | 6.939033018     | 7.671249171        |             |        |
| ENSG00000163346                         | 704.5896605                                           | 687.7977465     | 861.4404046        |             |        |
| 828.7770332                             | 991.537967                                            | 1454.1614       | 751.2759372        |             |        |
| 1091.492133                             | -0.538748567                                          | 0.011621247     | 0.068014548        |             | PBXIP1 |
| 1                                       | 154944076                                             | 154956123       | -                  | 3851        |        |
| protein_coding                          | PBX homeobox interacting protein 1 [Source:HGNC       |                 |                    |             |        |
| Symbol;Acc:HGNC:21199]                  | -                                                     | 609             | 742                | 881         | 825    |
| 1482                                    | 8.648454138                                           | 8.495018806     | 10.59753466        |             | 1085   |
| 10.35813689                             | 12.2776378                                            | 17.96473109     |                    |             |        |
| ENSG00000198483                         | 290.3973806                                           | 266.0349774     | 274.7613549        |             |        |
| 111.5081826                             | 137.0789816                                           | 234.5105092     | 277.064571         |             |        |
| 161.0325578                             | 0.782721994                                           | 0.011646241     | 0.068134746        |             |        |
| ANKRD35                                 | 1                                                     | 145866560       | 145885866          | -           | 3363   |
| protein_coding                          | ankyrin repeat domain 35 [Source:HGNC                 |                 |                    |             |        |
| Symbol;Acc:HGNC:26323]                  | -                                                     | 251             | 287                | 281         | 111    |
| 239                                     | 4.081704563                                           | 3.762608111     | 3.870632228        |             | 150    |
| 1.595869328                             | 1.94367205                                            | 3.317546887     |                    |             |        |
| ENSG00000152422                         | 326.2631926                                           | 297.5513162     | 253.2497898        |             |        |
| 178.8149235                             | 198.3075934                                           | 189.3745953     | 292.3547662        |             |        |
| 188.8323707                             | 0.629619965                                           | 0.011655798     | 0.068164569        |             | XRCC4  |
| 5                                       | 83077498                                              | 83353787        | +                  | 2676        |        |
| protein_coding                          | X-ray repair cross complementing 4 [Source:HGNC       |                 |                    |             |        |
| Symbol;Acc:HGNC:12831]                  | -                                                     | 282             | 321                | 259         | 178    |
| 193                                     | 5.763120655                                           | 5.288748087     | 4.483489023        |             | 217    |
| 3.216141216                             | 3.533720716                                           | 3.366799358     |                    |             |        |
| ENSG00000134215                         | 192.0556382                                           | 200.2214464     | 274.7613549        |             |        |
| 141.6455293                             | 111.490905                                            | 143.2574658     | 222.3461465        |             |        |
| 132.1313001                             | 0.752174897                                           | 0.011664738     | 0.068180634        |             | VAV3   |
| 1                                       | 107571160                                             | 107965144       | -                  | 7271        |        |
| protein_coding                          | vav guanine nucleotide exchange factor 3 [Source:HGNC |                 |                    |             |        |
| Symbol;Acc:HGNC:12659]                  | -                                                     | 166             | 216                | 281         | 141    |
| 146                                     | 1.248557812                                           | 1.309765554     | 1.790253911        |             | 122    |
| 0.937618536                             | 0.731179967                                           | 0.937356396     |                    |             |        |
| ENSG00000213676                         | 961.4351525                                           | 1196.693923     | 1326.872451        |             |        |
| 883.0242572                             | 596.7505                                              | 957.666347      | 1161.667175        |             |        |
| 812.480368                              | 0.516624828                                           | 0.011667465     | 0.068180634        |             | ATF6B  |
| 6                                       | 32115264                                              | 32128253        | -                  | 3629        |        |
| protein_coding                          | activating transcription factor 6 beta [Source:HGNC   |                 |                    |             |        |
| Symbol;Acc:HGNC:2349]                   | TF_bZIP                                               | 831             | 1291               | 1357        | 879    |
| 976                                     | 12.52301118                                           | 15.68459222     | 17.32189235        |             | 653    |
| 11.71124653                             | 7.841241158                                           | 12.55477359     |                    |             |        |
| ENSG00000166169                         | 322.7923075                                           | 337.4102153     | 265.9611692        |             |        |
| 575.6233212                             | 415.8062442                                           | 399.3547164     | 308.7212307        |             |        |
| 463.5947606                             | -0.586350206                                          | 0.011686168     | 0.068263831        |             | POLL   |
| 10                                      | 101578882                                             | 101588270       | -                  | 5420        |        |

|                                     |                                                    |                                         |             |             |       |             |
|-------------------------------------|----------------------------------------------------|-----------------------------------------|-------------|-------------|-------|-------------|
| protein_coding                      | DNA polymerase lambda [Source:HGNC                 |                                         |             |             |       |             |
| Symbol;Acc:HGNC:9184]               | -                                                  | 279                                     | 364         | 272         | 573   | 455         |
| 407                                 | 2.815137613                                        | 2.960983962                             | 2.324727608 |             |       |             |
| 5.111596357                         | 3.658227481                                        | 3.505428865                             |             |             |       |             |
| ENSG00000204469                     | 8224.840553                                        | 11811.21144                             | 13825.09181 |             |       |             |
| 17415.36806                         | 12784.89969                                        | 15977.1323                              | 11287.04793 |             |       |             |
| 15392.46668                         | -0.447440992                                       | 0.011721226                             | 0.06844247  |             |       | PRRC2A      |
| 6                                   | 31620720                                           | 31637771                                | +           | 9115        |       |             |
| protein_coding                      | proline rich coiled-coil 2A [Source:HGNC           |                                         |             |             |       |             |
| Symbol;Acc:HGNC:13918]              | -                                                  | 7109                                    | 12742       | 14139       | 17336 | 13990       |
| 16283                               | 42.65270254                                        | 61.63322396                             | 71.85623818 |             |       |             |
| 91.958831                           | 66.88359975                                        | 83.39188403                             |             |             |       |             |
| ENSG00000272843                     | 16.19746346                                        | 1.853902282                             | 13.68917783 |             |       | 0           |
| 0                                   | 0.981215519                                        | 10.58018119                             | 0.32707184  |             |       |             |
| 4.930952703                         | 0.011722844                                        | 1                                       | AC211476.2  | 7           |       |             |
| 72924418                            | 72925125                                           | -                                       | 708         | antisense   |       | "novel      |
| transcript, antisense to POM121"    |                                                    | -                                       | 14          | 2           |       | 14          |
| 0                                   | 0                                                  | 1                                       | 1.081407783 | 0.124546262 |       |             |
| 0.916003712                         | 0                                                  | 0                                       | 0.065934509 |             |       |             |
| ENSG00000147457                     | 2530.275185                                        | 2658.495872                             | 2438.62925  |             |       |             |
| 3100.128393                         | 3164.696755                                        | 3198.762593                             | 2542.466769 |             |       |             |
| 3154.529247                         | -0.311149896                                       | 0.011748002                             | 0.068533119 |             |       | CHMP7       |
| 8                                   | 23243637                                           | 23262000                                | +           | 4698        |       |             |
| protein_coding                      | charged multivesicular body protein 7 [Source:HGNC |                                         |             |             |       |             |
| Symbol;Acc:HGNC:28439]              | -                                                  | 2187                                    | 2868        | 2494        | 3086  | 3463        |
| 3260                                | 25.45836351                                        | 26.91535377                             | 24.5915494  |             |       |             |
| 31.76026561                         | 32.1216671                                         | 32.39295916                             |             |             |       |             |
| ENSG00000253106                     | 38.1797353                                         | 28.73548537                             | 29.33395248 |             |       |             |
| 82.37541421                         | 74.02265007                                        | 66.72265532                             | 32.08305772 |             |       |             |
| 74.3735732                          | -1.216164249                                       | 0.011748208                             | 0.068533119 |             |       |             |
| AC090198.1                          | 8                                                  | 124488510                               | 124491643   | +           |       | 2355        |
| antisense                           |                                                    | "novel transcript, antisense to TATDN1" | -           |             |       |             |
| 33                                  | 31                                                 | 30                                      | 82          | 81          | 68    | 0.766333377 |
| 0.580369713                         | 0.590109762                                        | 1.683542783                             | 1.498831132 |             |       |             |
| 1.347919751                         |                                                    |                                         |             |             |       |             |
| ENSG00000178685                     | 290.3973806                                        | 632.1806781                             | 535.8335321 |             |       |             |
| 680.0994563                         | 714.6384241                                        | 880.150321                              | 486.1371969 |             |       |             |
| 758.2960671                         | -0.639539581                                       | 0.011751998                             | 0.068533119 |             |       | PARP10      |
| 8                                   | 143977153                                          | 144012772                               | -           | 6033        |       |             |
| protein_coding                      | poly(ADP-ribose) polymerase family member 10       |                                         |             |             |       |             |
| [Source:HGNC Symbol;Acc:HGNC:25895] | -                                                  |                                         | 251         | 682         |       | 548         |
| 677                                 | 782                                                | 897                                     | 2.27528136  | 4.984080031 |       |             |
| 4.207747678                         | 5.425709782                                        | 5.648485594                             | 6.940730052 |             |       |             |
| ENSG00000107890                     | 716.1592773                                        | 663.6970168                             | 640.4579626 |             |       |             |
| 499.2753763                         | 541.0050474                                        | 407.2044406                             | 673.4380856 |             |       |             |
| 482.4949548                         | 0.480421686                                        | 0.011754683                             | 0.068533119 |             |       |             |
| ANKRD26 10                          | 26991914                                           | 27100498                                | -           | 7941        |       |             |
| protein_coding                      | ankyrin repeat domain 26 [Source:HGNC              |                                         |             |             |       |             |
| Symbol;Acc:HGNC:29186]              | -                                                  | 619                                     | 716         | 655         | 497   | 592         |
| 415                                 | 4.262949282                                        | 3.975317168                             | 3.820925411 |             |       |             |

|                 |                                                                                                |             |                          |             |                |             |  |
|-----------------|------------------------------------------------------------------------------------------------|-------------|--------------------------|-------------|----------------|-------------|--|
| 3.026093963     | 3.248666338                                                                                    | 2.439601752 |                          |             |                |             |  |
| ENSG00000118762 | 1298.111                                                                                       | 1189.278314 | 1132.290566              |             |                |             |  |
| 967.4088278     | 868.1668835                                                                                    | 935.0983901 | 1206.55996               |             |                |             |  |
| 923.5580338     | 0.385444123                                                                                    | 0.011787316 | 0.068697179              | PKD2        |                |             |  |
| 4               | 88007668                                                                                       | 88077777    | +                        | 5498        |                |             |  |
| protein_coding  | "polycystin 2, transient receptor potential cation channel [Source:HGNC Symbol;Acc:HGNC:9009]" |             |                          |             |                |             |  |
|                 | 1158                                                                                           | 963         | 950                      | 953         | 11.16047899    | 10.28859042 |  |
|                 | 9.756774771                                                                                    | 8.468817384 | 7.529696433              | 8.091596185 |                |             |  |
| ENSG00000179627 | 97.18478076                                                                                    | 114.9419415 | 113.4246163              |             |                |             |  |
| 193.8835969     | 200.1353132                                                                                    | 160.9193452 | 108.5171128              |             |                |             |  |
| 184.9794184     | -0.768240748                                                                                   | 0.011796492 | 0.068724457              | ZBTB42      |                |             |  |
| 14              | 104800596                                                                                      | 104804712   | +                        | 3905        |                |             |  |
| protein_coding  | zinc finger and BTB domain containing 42 [Source:HGNC Symbol;Acc:HGNC:32550]                   |             |                          |             |                |             |  |
|                 | 164                                                                                            | 1.176394433 | 1.400021177              | 1.376066451 |                |             |  |
| 2.389667556     | 2.443890113                                                                                    | 1.960509024 |                          |             |                |             |  |
| ENSG00000183850 | 26.61011854                                                                                    | 21.31987624 | 25.42275882              | 0           |                |             |  |
|                 | 5.483159264                                                                                    | 5.887293117 | 24.45091787              | 3.790150794 |                |             |  |
|                 | 2.681653818                                                                                    | 0.011801316 | 0.068726369              | ZNF730      | 19             |             |  |
|                 | 23075210                                                                                       | 23147219    | +                        | 3291        | protein_coding |             |  |
|                 | zinc finger protein 730 [Source:HGNC Symbol;Acc:HGNC:32470]                                    |             |                          |             |                |             |  |
|                 | zf-C2H2                                                                                        | 23          | 23                       | 26          | 0              | 6           |  |
| 0.382203506     | 0.308129949                                                                                    | 0.365972052 | 0                        | 0.079447817 |                |             |  |
|                 | 0.085107808                                                                                    |             |                          |             |                |             |  |
| ENSG00000173898 | 919.7845322                                                                                    | 1276.411721 | 1467.675423              |             |                |             |  |
| 1819.29116      | 1506.041078                                                                                    | 1723.014452 | 1221.290559              |             |                |             |  |
| 1682.78223      | -0.46158636                                                                                    | 0.011823014 | 0.068806189              | SPTBN2      |                |             |  |
| 11              | 66685248                                                                                       | 66729226    | -                        | 9642        |                |             |  |
| protein_coding  | "spectrin beta, non-erythrocytic 2 [Source:HGNC Symbol;Acc:HGNC:11276]"                        |             |                          |             |                |             |  |
|                 | 1756                                                                                           | 4.509150328 | 6.296522666              | 7.21134081  | 1648           |             |  |
| 9.08139445      | 7.44815452                                                                                     | 8.501653886 |                          |             |                |             |  |
| ENSG00000222031 | 0                                                                                              | 0           | 0                        | 14.06409511 | 15.53561792    |             |  |
|                 | 0                                                                                              | 0           | 9.866571008              | -5.72287438 | 0.011825198    |             |  |
|                 | 1                                                                                              | AC023469.1  | 2                        | 151001220   | 151048774      |             |  |
|                 | -                                                                                              | 469         | lincRNA novel transcript | -           | 0              |             |  |
|                 | 0                                                                                              | 0           | 14                       | 17          | 0              | 0           |  |
|                 | 1.443299328                                                                                    | 1.579554723 | 0                        |             |                |             |  |
| ENSG0000060491  | 1166.217369                                                                                    | 1949.378249 | 1904.751315              |             |                |             |  |
| 2188.975946     | 2101.877718                                                                                    | 2777.821136 | 1673.448978              |             |                |             |  |
| 2356.224933     | -0.492963089                                                                                   | 0.011826292 | 0.068806189              | OGFR        |                |             |  |
| 20              | 62804835                                                                                       | 62814000    | +                        | 4702        |                |             |  |
| protein_coding  | opioid growth factor receptor [Source:HGNC Symbol;Acc:HGNC:15768]                              |             |                          |             |                |             |  |
|                 | 2831                                                                                           | 11.72391389 | 19.71925967              | 19.19149396 | 2300           |             |  |
| 22.40659281     | 21.31590662                                                                                    | 28.1062743  |                          |             |                |             |  |
| ENSG00000167112 | 1266.873035                                                                                    | 1642.557422 | 1545.899296              |             |                |             |  |
| 1922.762717     | 2035.165947                                                                                    | 1841.74153  | 1485.109917              |             |                |             |  |
| 1933.223398     | -0.379874435                                                                                   | 0.011828525 | 0.068806189              | TRUB2       |                |             |  |



|                                               |                                                      |                  |   |                     |        |
|-----------------------------------------------|------------------------------------------------------|------------------|---|---------------------|--------|
| 9                                             | 128305161                                            | 128322742        | - | 6125                |        |
| protein_coding                                | TruB pseudouridine synthase family member 2          |                  |   |                     |        |
| [Source:HGNC Symbol;Acc:HGNC:17170]           |                                                      |                  | - | 1095 1772           | 1581   |
| 1914                                          | 2227 1877                                            | 9.776935248      |   | 12.75532658         |        |
| 11.95716529                                   | 15.10904647                                          | 15.84428777      |   | 14.30553866         |        |
| ENSG00000149231                               | 1674.123545                                          | 1294.950744      |   | 1202.692052         |        |
| 1048.779664                                   | 1106.684312                                          | 929.2110969      |   | 1390.58878          |        |
| 1028.225024                                   | 0.434793256                                          | 0.011865337      |   | 0.068989182         | CCDC82 |
| 11                                            | 96352769                                             | 96389956         | - | 17313               |        |
| protein_coding                                | coiled-coil domain containing 82 [Source:HGNC        |                  |   |                     |        |
| Symbol;Acc:HGNC:26282]                        |                                                      |                  | - | 1447 1397 1230 1044 | 1211   |
| 947                                           | 4.570786277                                          | 3.557607525      |   | 3.291055742         |        |
| 2.915609698                                   | 3.048108429                                          | 2.553428408      |   |                     |        |
| ENSG00000125741                               | 1237.948993                                          | 1152.200268      |   | 1307.316482         |        |
| 1580.201543                                   | 1554.475651                                          | 1592.512788      |   | 1232.488581         |        |
| 1575.729994                                   | -0.354536898                                         | 0.01186901       |   | 0.068989182         | OPA3   |
| 19                                            | 45527427                                             | 45602212         | - | 9999                |        |
| protein_coding                                | "OPA3, outer mitochondrial membrane lipid metabolism |                  |   |                     |        |
| regulator [Source:HGNC Symbol;Acc:HGNC:8142]" |                                                      |                  | - | 1070 1243           |        |
| 1337                                          | 1573 1701                                            | 1623 5.852237222 |   | 5.480857595         |        |
| 6.19408691                                    | 7.606298604                                          | 7.413210684      |   | 7.577186682         |        |
| ENSG00000139517                               | 481.2960571                                          | 370.7804563      |   | 496.7215954         |        |
| 547.495131                                    | 732.0017618                                          | 653.489536       |   | 449.5993696         |        |
| 644.3288096                                   | -0.520207493                                         | 0.011878001      |   | 0.069015206         | LNx2   |
| 13                                            | 27545911                                             | 27620404         | - | 4692                |        |
| protein_coding                                | ligand of numb-protein X 2 [Source:HGNC              |                  |   |                     |        |
| Symbol;Acc:HGNC:20421]                        |                                                      |                  | - | 416 400 508 545     | 801    |
| 666                                           | 4.848752761                                          | 3.75868513       |   | 5.015429899         |        |
| 5.616163146                                   | 7.439317777                                          | 6.626165235      |   |                     |        |
| ENSG00000080839                               | 1195.141411                                          | 940.855408       |   | 1051.133297         |        |
| 723.2963199                                   | 736.5710612                                          | 892.9061227      |   | 1062.376705         |        |
| 784.2578346                                   | 0.437370632                                          | 0.011888742      |   | 0.069051369         | RBL1   |
| 20                                            | 36996349                                             | 37095995         | - | 5954                |        |
| protein_coding                                | RB transcriptional corepressor like 1 [Source:HGNC   |                  |   |                     |        |
| Symbol;Acc:HGNC:9893]                         |                                                      |                  | - | 1033 1015 1075 720  | 806    |
| 910                                           | 9.488251853                                          | 7.516076122      |   | 8.363770161         |        |
| 5.846889452                                   | 5.899087109                                          | 7.134747334      |   |                     |        |
| ENSG00000235636                               | 69.41770054                                          | 76.00999355      |   | 58.66790497         |        |
| 144.659264                                    | 129.7681026                                          | 111.8585692      |   | 68.03186635         |        |
| 128.7619786                                   | -0.920154882                                         | 0.011900614      |   | 0.069094071         | NUS1P1 |
| X                                             | 47512602                                             | 47513483         | - | 882                 |        |
| processed_pseudogene                          | NUS1 pseudogene 1 [Source:HGNC                       |                  |   |                     |        |
| Symbol;Acc:HGNC:38472]                        |                                                      |                  | - | 60 82 60 144        | 142    |
| 114                                           | 3.720294995                                          | 4.099012335      |   | 3.151266416         |        |
| 7.893963672                                   | 7.01581869                                           | 6.033680398      |   |                     |        |
| ENSG00000234664                               | 65.94681552                                          | 52.83621503      |   | 71.37928438         |        |
| 25.11445555                                   | 28.3296562                                           | 22.56795695      |   | 63.38743831         |        |
| 25.33735623                                   | 1.32155303                                           | 0.011922262      |   | 0.069193477         |        |
| HMG2P5 15                                     | 29730713                                             | 29730985         | + | 273                 |        |
| processed_pseudogene                          | high mobility group nucleosomal binding domain       |                  |   |                     |        |

|                                                                                                                     |                       |                          |
|---------------------------------------------------------------------------------------------------------------------|-----------------------|--------------------------|
| 2 pseudogene 5 [Source:HGNC Symbol;Acc:HGNC:33568]                                                                  | -                     | 57                       |
| 57 73 25 31 23                                                                                                      | 11.41844387           |                          |
| 9.205474231 12.38690107 4.427703983                                                                                 | 4.948318491           |                          |
| 3.932884794                                                                                                         |                       |                          |
| ENSG00000135823 1209.024951 1076.190275                                                                             | 998.3321829           |                          |
| 1461.661313 1444.812466 1358.983494                                                                                 | 1094.515803           |                          |
| 1421.819091 -0.377976476 0.011952555                                                                                | 0.069342962           | STX6                     |
| 1 180972712 181023121                                                                                               | - 6477                |                          |
| protein_coding syntaxin 6 [Source:HGNC Symbol;Acc:HGNC:11441]                                                       | -                     |                          |
| 1045 1161 1021 1455 1581 1385                                                                                       | 8.823423124           |                          |
| 7.903005436 7.302209704 10.86151266                                                                                 | 10.6369366            |                          |
| 9.982099906                                                                                                         |                       |                          |
| ENSG00000226291 0 2.780853423 1.955596832                                                                           | 34.15565955           |                          |
| 10.96631853 6.868508636 1.578816752                                                                                 | 17.33016224           |                          |
| -3.416511651 0.011964655 1                                                                                          | AC091729.2            | 7                        |
| 1080863 1082178 + 302                                                                                               | antisense novel       |                          |
| transcript - 0 3 2 34 12                                                                                            | 7                     |                          |
| 0 0.43797394 0.306778916 5.44343687                                                                                 |                       |                          |
| 1.731541484 1.082024596                                                                                             |                       |                          |
| ENSG00000179532 411.8783566 406.0045997                                                                             | 436.0980936           |                          |
| 765.4886052 458.7576585 619.1469928                                                                                 | 417.9936833           |                          |
| 614.4644188 -0.555297646 0.011970297                                                                                | 0.069419549           | DNHD1                    |
| 11 6497260 6593758 + 19629                                                                                          | protein_coding dynein |                          |
| heavy chain domain 1 [Source:HGNC Symbol;Acc:HGNC:26532]                                                            | -                     |                          |
| 356 438 446 762 502 631                                                                                             | 0.991851229           |                          |
| 0.983806966 1.052541285 1.876972946                                                                                 | 1.114459113           |                          |
| 1.500642424                                                                                                         |                       |                          |
| ENSG00000142459 453.5289769 629.3998246 650.2359467                                                                 |                       |                          |
| 742.3833061 827.0431891 862.4884416 577.7215828                                                                     |                       |                          |
| 810.6383122 -0.487457258 0.011977752                                                                                | 0.069436442           | EVI5L                    |
| 19 7830233 7864976 + 6252                                                                                           | protein_coding        |                          |
| ecotropic viral integration site 5 like [Source:HGNC Symbol;Acc:HGNC:30464]                                         | -                     | 392 679 665 739 905      |
| 879 3.428955195 4.788337603 4.927256054                                                                             |                       |                          |
| 5.715137527 6.307949497 6.563204577                                                                                 |                       |                          |
| ENSG00000179950 4939.069394 5773.051705 5711.320549                                                                 |                       |                          |
| 7199.812117 6161.243294 7249.220258 5474.480549                                                                     |                       |                          |
| 6870.09189 -0.32741594 0.011995304 0.069511834                                                                      |                       | PUF60                    |
| 8 143816344 143829859 - 5424                                                                                        |                       |                          |
| protein_coding poly(U) binding splicing factor 60 [Source:HGNC Symbol;Acc:HGNC:17042]                               | -                     | 4269 6228 5841 7167 6742 |
| 7388 43.04286656 50.62474877 49.88500053                                                                            |                       |                          |
| 63.88794811 54.16611221 63.58479007                                                                                 |                       |                          |
| ENSG00000261716 121.480976 126.9923063 147.6475608                                                                  |                       |                          |
| 81.37083598 59.40089203 70.6475174 132.040281                                                                       |                       |                          |
| 70.47308181 0.907324535 0.012013326 0.069578854                                                                     |                       |                          |
| HIST2H2BC 1 149844498 149850937 - 6440                                                                              |                       |                          |
| transcribed_unprocessed_pseudogene histone cluster 2 H2B family member c (pseudogene) [Source:NCBI gene;Acc:337873] | -                     |                          |
| 105 137 151 81 65 72 0.891657659                                                                                    |                       |                          |

|                                                    |                                                        |             |             |             |           |
|----------------------------------------------------|--------------------------------------------------------|-------------|-------------|-------------|-----------|
|                                                    | 0.937926179                                            | 1.086159327 | 0.608135517 | 0.439831254 |           |
|                                                    | 0.521906451                                            |             |             |             |           |
| ENSG00000141522                                    | 4421.907525                                            | 8574.298053 | 7187.796157 |             |           |
| 9776.555257                                        | 8441.323688                                            | 9924.994979 | 6728.000578 |             |           |
| 9380.957975                                        | -0.479337593                                           | 0.012015973 | 0.069578854 |             |           |
| ARHGDI17                                           | 81867721                                               | 81871406    | -           | 2903        |           |
| protein_coding                                     | Rho GDP dissociation inhibitor alpha [Source:HGNC      |             |             |             |           |
| Symbol;Acc:HGNC:678]                               | -                                                      | 3822        | 9250        | 7351        | 9732 9237 |
| 10115                                              | 72.00097204                                            | 140.4845792 | 117.3010346 |             |           |
| 162.0900219                                        | 138.6572254                                            | 162.6540521 |             |             |           |
| ENSG00000177946                                    | 534.5162942                                            | 552.4628799 | 558.3228956 |             |           |
| 692.154395                                         | 761.2452779                                            | 760.4420276 | 548.4340233 |             |           |
| 737.9472335                                        | -0.428110593                                           | 0.012069731 | 0.069851811 |             |           |
| CENPBD1                                            | 89969773                                               | 89972832    | -           | 3060        |           |
| protein_coding                                     | CENPB DNA-binding domain containing 1 [Source:HGNC     |             |             |             |           |
| Symbol;Acc:HGNC:28272]                             | -                                                      | 462         | 596         | 571         | 689 833   |
| 775                                                | 8.256866481                                            | 8.587342628 | 8.644047358 |             |           |
| 10.8867691                                         | 11.86266245                                            | 11.82296249 |             |             |           |
| ENSG00000183291                                    | 4564.213811                                            | 3803.280531 | 3615.898543 |             |           |
| 2919.304313                                        | 3554.001063                                            | 2754.271963 | 3994.464295 |             |           |
| 3075.859113                                        | 0.376692566                                            | 0.012076106 | 0.069851811 |             |           |
| SELENOF                                            | 86862445                                               | 86914424    | -           | 2201        |           |
| protein_coding                                     | selenoprotein F [Source:HGNC Symbol;Acc:HGNC:17705]    |             |             |             |           |
| -                                                  | 3945                                                   | 4103        | 3698        | 2906        | 3889 2807 |
| 98.02157529                                        | 82.18932853                                            | 77.83041032 | 63.83763421 |             |           |
| 76.99747764                                        | 59.53445824                                            |             |             |             |           |
| ENSG00000168300                                    | 550.7137576                                            | 569.1480005 | 455.6540619 |             |           |
| 349.5932213                                        | 427.6864226                                            | 301.2331645 | 525.17194   |             |           |
| 359.5042695                                        | 0.546140471                                            | 0.012076819 | 0.069851811 |             | PCMTD1    |
| 8                                                  | 51817575                                               | 51899186    | -           | 7323        |           |
| protein_coding                                     | protein-L-isoaspartate (D-aspartate) O-                |             |             |             |           |
| methyltransferase domain containing 1 [Source:HGNC |                                                        |             |             |             |           |
| Symbol;Acc:HGNC:30483]                             | -                                                      | 476         | 614         | 466         | 348 468   |
| 307                                                | 3.554779208                                            | 3.696692233 | 2.947808986 |             |           |
| 2.297689959                                        | 2.784937266                                            | 1.95702051  |             |             |           |
| ENSG00000089060                                    | 188.5847531                                            | 230.8108341 | 196.5374816 |             |           |
| 353.6115342                                        | 241.2590076                                            | 383.6552681 | 205.311023  |             |           |
| 326.17527                                          | -0.666315323                                           | 0.012082073 | 0.069855767 |             | SLC8B1    |
| 12                                                 | 113298759                                              | 113359493   | -           | 6768        |           |
| protein_coding                                     | solute carrier family 8 member B1 [Source:HGNC         |             |             |             |           |
| Symbol;Acc:HGNC:26175]                             | -                                                      | 163         | 249         | 201         | 352 264   |
| 391                                                | 1.317109757                                            | 1.62208256  | 1.375745697 |             |           |
| 2.514684645                                        | 1.699817024                                            | 2.696885096 |             |             |           |
| ENSG00000198959                                    | 19.66834849                                            | 75.08304241 | 113.4246163 |             |           |
| 35.16023777                                        | 14.62175804                                            | 13.73701727 | 69.39200239 |             |           |
| 21.17300436                                        | 1.717709958                                            | 0.012105802 | 0.0699665   |             | TGM2      |
| 20                                                 | 38127387                                               | 38166578    | -           | 8036        |           |
| protein_coding                                     | transglutaminase 2 [Source:HGNC Symbol;Acc:HGNC:11778] |             |             |             |           |
| -                                                  | 17                                                     | 81          | 116         | 35          | 16 14     |
| 0.1156921                                          | 0.444405115                                            | 0.668683361 | 0.210585921 |             |           |

|                 |                              |                                           |                        |                         |             |      |             |
|-----------------|------------------------------|-------------------------------------------|------------------------|-------------------------|-------------|------|-------------|
| 0.086763818     | 0.081326886                  |                                           |                        |                         |             |      |             |
| ENSG00000212242 | 0                            | 0                                         | 0                      | 20.09156444             | 3.65543951  |      |             |
|                 | 1.962431039                  | 0                                         | 8.569811663            | -5.517538082            |             |      |             |
| 0.012118667     | 1                            | RNA5SP219                                 | 6                      | 136630243               |             |      |             |
| 136630355       | +                            | 113                                       | rRNA_pseudogene        | "RNA, 5S ribosomal      |             |      |             |
| pseudogene 219  | [Source:HGNC                 | Symbol;Acc:HGNC:43119]"                   | -                      | 0                       |             |      |             |
|                 | 0                            | 0                                         | 20                     | 4                       | 2           | 0    | 0           |
|                 | 8.557615485                  | 1.542553181                               | 0.826223585            |                         |             |      |             |
| ENSG00000165801 | 1470.49829                   | 1509.076457                               | 1812.838264            |                         |             |      |             |
| 1173.347363     | 993.3656868                  | 1393.326038                               | 1597.471004            |                         |             |      |             |
| 1186.679696     | 0.429227132                  | 0.012126037                               | 0.070032589            |                         |             |      |             |
| ARHGEF40        | 14                           | 21070270                                  | 21090240               | +                       | 8189        |      |             |
|                 | protein_coding               | Rho guanine nucleotide exchange factor 40 |                        |                         |             |      |             |
|                 | [Source:HGNC                 | Symbol;Acc:HGNC:25516]                    | -                      | 1271                    | 1628        | 1854 |             |
|                 | 1168                         | 1087                                      | 1420                   | 8.488078594             | 8.765112354 |      |             |
| 10.48772556     | 6.896253036                  | 5.784386059                               | 8.09475128             |                         |             |      |             |
| ENSG00000073150 | 48.59239038                  | 38.93194792                               | 24.4449604             |                         |             |      |             |
| 113.5173391     | 51.17615314                  | 104.9900606                               | 37.32309957            |                         |             |      |             |
| 89.8945176      | -1.270521003                 | 0.012126399                               | 0.070032589            |                         | PANX2       |      |             |
|                 | 22                           | 50170731                                  | 50180294               | +                       | 3102        |      |             |
| protein_coding  | pannexin 2                   | [Source:HGNC                              | Symbol;Acc:HGNC:8600]  | -                       |             |      |             |
|                 | 42                           | 42                                        | 25                     | 113                     | 56          | 107  | 0.740461035 |
|                 | 0.596954809                  | 0.373336689                               | 1.761318377            | 0.786692177             |             |      |             |
|                 | 1.610230394                  |                                           |                        |                         |             |      |             |
| ENSG00000186141 | 2814.887757                  | 2446.224061                               | 2208.846622            |                         |             |      |             |
| 3298.030303     | 3202.16501                   | 3012.331645                               | 2489.986147            |                         |             |      |             |
| 3170.842319     | -0.349059458                 | 0.012134488                               | 0.070052839            |                         | POLR3C      |      |             |
|                 | 1                            | 145824088                                 | 145842505              | +                       | 2793        |      |             |
| protein_coding  | RNA polymerase III subunit C | [Source:HGNC                              | Symbol;Acc:HGNC:30076] | -                       | 2433        | 2639 | 2259        |
|                 | 3070                         | 47.63935644                               | 41.65838338            | 37.46689912             |             | 3504 |             |
| 56.83307618     | 54.67033808                  | 51.31135408                               |                        |                         |             |      |             |
| ENSG00000136160 | 19.66834849                  | 25.95463194                               | 75.29047804            |                         |             |      |             |
| 9.041203998     | 6.397019142                  | 14.71823279                               | 40.30448616            |                         |             |      |             |
| 10.05215198     | 2.007624495                  | 0.012163096                               | 0.070191488            |                         | EDNRB       |      |             |
|                 | 13                           | 77895481                                  | 77975529               | -                       | 5607        |      |             |
| protein_coding  | endothelin receptor type B   | [Source:HGNC                              | Symbol;Acc:HGNC:3180]  | -                       | 17          | 28   | 77          |
|                 | 15                           | 0.165810901                               | 0.220171668            | 0.636154531             |             | 7    |             |
| 0.077609193     | 0.054403405                  | 0.124883982                               |                        |                         |             |      |             |
| ENSG00000188171 | 8.09873173                   | 3.707804563                               | 11.73358099            |                         | 0           |      |             |
|                 | 0                            | 7.846705762                               | 0                      | 5.464185453             |             |      |             |
| 0.012180324     | 1                            | ZNF626                                    | 19                     | 20620061                | 20661596    |      |             |
|                 | -                            | 6713                                      | protein_coding         | zinc finger protein 626 |             |      |             |
|                 | [Source:HGNC                 | Symbol;Acc:HGNC:30461]                    | zf-C2H2                | 7                       | 4           | 12   |             |
|                 | 0                            | 0                                         | 0                      | 0.05702642              | 0.026271042 |      |             |
| 0.082807001     | 0                            | 0                                         | 0                      |                         |             |      |             |
| ENSG00000163714 | 5444.661646                  | 5054.664571                               | 4828.368579            |                         |             |      |             |
| 3990.184698     | 4426.737246                  | 3929.768155                               | 5109.231599            |                         |             |      |             |
| 4115.563367     | 0.311851726                  | 0.012193186                               | 0.070320371            |                         | U2SURP      |      |             |

|                                     |                                                    |             |             |             |                      |
|-------------------------------------|----------------------------------------------------|-------------|-------------|-------------|----------------------|
| 3                                   | 142964497                                          | 143060546   | +           | 11118       |                      |
| protein_coding                      | U2 snRNP associated SURP domain containing         |             |             |             |                      |
| [Source:HGNC Symbol;Acc:HGNC:30855] |                                                    | -           | 4706        | 5453        | 4938                 |
| 3972                                | 4844                                               | 4005        | 23.14834604 | 21.62433626 |                      |
| 20.57438544                         | 17.27363691                                        | 18.98611305 | 16.81596855 |             |                      |
| ENSG00000092108                     | 1231.007223                                        | 1183.716607 | 1001.265578 |             |                      |
| 745.3970407                         | 950.4142725                                        | 844.8265623 | 1138.663136 |             |                      |
| 846.8792918                         | 0.426560581                                        | 0.012196266 | 0.070320371 |             | SCFD1                |
| 14                                  | 30622112                                           | 30735812    | +           | 6571        |                      |
| protein_coding                      | sec1 family domain containing 1                    |             |             |             |                      |
| [Source:HGNC Symbol;Acc:HGNC:20726] |                                                    | -           | 1064        | 1277        | 1040                 |
| 861                                 | 8.855332516                                        | 8.568274827 | 7.218898661 |             |                      |
| 5.459761284                         | 6.897003873                                        | 6.116707599 |             |             |                      |
| ENSG00000048828                     | 3800.619105                                        | 3250.817651 | 3958.127989 |             |                      |
| 2936.382143                         | 2978.26934                                         | 2842.58136  | 3669.854915 |             |                      |
| 2919.077614                         | 0.330066059                                        | 0.012201222 | 0.070320371 |             |                      |
| FAM120A 9                           | 93451722                                           | 93566107    | +           | 7204        |                      |
| protein_coding                      | family with sequence similarity 120A               |             |             |             |                      |
| [Source:HGNC Symbol;Acc:HGNC:13247] |                                                    | -           | 3285        | 3507        | 3259                 |
| 2897                                | 24.93769922                                        | 21.46327647 | 26.02970556 |             |                      |
| 19.61807216                         | 19.71375042                                        | 18.77244441 |             |             |                      |
| ENSG00000147044                     | 565.7542594                                        | 483.8684955 | 420.4533189 |             |                      |
| 274.2498546                         | 376.5102695                                        | 345.3878629 | 490.025358  |             |                      |
| 332.049329                          | 0.560160295                                        | 0.01220383  | 0.070320371 |             | CASK                 |
| X                                   | 41514934                                           | 41923645    | -           | 19939       |                      |
| protein_coding                      | calcium/calmodulin dependent serine protein kinase |             |             |             |                      |
| [Source:HGNC Symbol;Acc:HGNC:1497]  |                                                    | -           | 489         | 522         | 430                  |
| 273                                 | 412                                                | 352         | 1.341220548 | 1.154253201 |                      |
| 0.999004715                         | 0.662003812                                        | 0.900435151 | 0.824110269 |             |                      |
| ENSG00000150712                     | 829.5415215                                        | 883.3844372 | 849.7068236 |             |                      |
| 1358.189756                         | 1084.751674                                        | 1001.821045 | 854.2109275 |             |                      |
| 1148.254159                         | -0.42643163                                        | 0.012213279 | 0.070348304 |             | MTMR12               |
| 5                                   | 32226994                                           | 32313009    | -           | 5545        |                      |
| protein_coding                      | myotubularin related protein 12                    |             |             |             |                      |
| [Source:HGNC Symbol;Acc:HGNC:18191] |                                                    | -           | 717         | 953         | 1187                 |
| 1021                                | 7.071512574                                        | 7.577488887 | 7.259733557 |             |                      |
| 11.78898344                         | 9.328413015                                        | 8.595481847 |             |             |                      |
| ENSG00000185386                     | 209.4100633                                        | 186.3171793 | 199.4708769 |             |                      |
| 223.0163653                         | 324.4202565                                        | 420.9414579 | 198.3993732 |             |                      |
| 322.7926932                         | -0.70294777                                        | 0.012226866 | 0.070400035 |             | MAPK11               |
| 22                                  | 50263713                                           | 50270767    | -           | 2688        |                      |
| protein_coding                      | mitogen-activated protein kinase 11                |             |             |             |                      |
| [Source:HGNC Symbol;Acc:HGNC:6873]  |                                                    | -           | 181         | 201         | 355                  |
| 429                                 | 3.682510749                                        | 3.296861865 | 3.515631595 |             |                      |
| 3.993235529                         | 5.755163769                                        | 7.450305196 |             |             |                      |
| ENSG00000241749                     | 223.2936034                                        | 350.3875312 | 133.958383  |             |                      |
| 351.6023777                         | 388.3904479                                        | 474.9083114 | 235.8798392 |             |                      |
| 404.9670457                         | -0.778766438                                       | 0.012252016 | 0.070518284 |             |                      |
| RPSAP52 12                          | 65758020                                           | 65826997    | -           | 2035        |                      |
| transcribed_processed_pseudogene    |                                                    |             |             |             | ribosomal protein SA |

|                                                                 |   |     |
|-----------------------------------------------------------------|---|-----|
| pseudogene 52 [Source:HGNC Symbol;Acc:HGNC:35752]               | - | 193 |
| 378 137 350 425 484 5.186657951                                 |   |     |
| 8.189574618 3.118592351 8.315815539 9.100874263                 |   |     |
| 11.10265855                                                     |   |     |
| ENSG00000136826 138.8354011 190.0249839 167.2035292             |   |     |
| 283.2910586 242.1728675 262.9657592 165.354638                  |   |     |
| 262.8098951 -0.666187285 0.012265322 0.070568301 KLF4           |   |     |
| 9 107484852 107490482 - 3659                                    |   |     |
| protein_coding Kruppel like factor 4 [Source:HGNC               |   |     |
| Symbol;Acc:HGNC:6348] zf-C2H2 120 205 171 282 265               |   |     |
| 268 1.793550252 2.470161847 2.164891607                         |   |     |
| 3.72638665 3.156036827 3.419152098                              |   |     |
| ENSG00000196663 638.642845 752.6843264 772.4607488              |   |     |
| 1116.086405 838.9233675 996.9149678 721.26264                   |   |     |
| 983.9749133 -0.447165926 0.012278419 0.07060602 TECPR2          |   |     |
| 14 102362963 102502481 + 9384                                   |   |     |
| protein_coding tectonin beta-propeller repeat containing 2      |   |     |
| [Source:HGNC Symbol;Acc:HGNC:19957] - 552 812 790               |   |     |
| 1111 918 1016 3.216960967 3.815065407                           |   |     |
| 3.899792933 5.724364455 4.26297985 5.054192101                  |   |     |
| ENSG00000078487 41.65062033 35.22414335 36.1785414              |   |     |
| 86.39372709 71.28107044 90.27182779 37.68443503                 |   |     |
| 82.64887511 -1.134400484 0.012284714 0.07060602 ZCWPW1          |   |     |
| 7 100400826 100428992 - 3318                                    |   |     |
| protein_coding zinc finger CW-type and PWWP domain containing 1 |   |     |
| [Source:HGNC Symbol;Acc:HGNC:23486] - 36 38 37                  |   |     |
| 86 78 92 0.593363506 0.504941624                                |   |     |
| 0.516568356 1.253208368 1.024417099 1.294367147                 |   |     |
| ENSG00000196810 550.7137576 606.2260461 650.2359467             |   |     |
| 756.4474012 785.0056347 913.5116486 602.3919168                 |   |     |
| 818.3215615 -0.441390323 0.012291931 0.07060602 CTBP1-          |   |     |
| DT 4 1249300 1288291 + 7820 antisense CTBP1                     |   |     |
| divergent transcript [Source:HGNC Symbol;Acc:HGNC:28307] -      |   |     |
| 476 654 665 753 859 931 3.328855261                             |   |     |
| 3.687270113 3.939284507 4.655747724 4.786796982                 |   |     |
| 5.557621472                                                     |   |     |
| ENSG00000162929 395.6808931 359.6570426 417.5199237             |   |     |
| 228.0392564 321.6786769 223.7171384 390.9526198                 |   |     |
| 257.8116906 0.599622948 0.012294179 0.07060602                  |   |     |
| KIAA1841 2 61065871 61138034 + 7992                             |   |     |
| protein_coding KIAA1841 [Source:HGNC Symbol;Acc:HGNC:29387]     |   |     |
| - 342 388 427 227 352 228                                       |   |     |
| 2.340266649 2.140475239 2.474998019 1.373319537                 |   |     |
| 1.919312916 1.331758286                                         |   |     |
| ENSG00000196776 3655.998895 3209.10485 3083.976205              |   |     |
| 2343.680992 2938.059506 2476.587971 3316.359983                 |   |     |
| 2586.10949 0.358478121 0.012299651 0.07060602 CD47              |   |     |
| 3 108043094 108091862 - 8225                                    |   |     |
| protein_coding CD47 molecule [Source:HGNC Symbol;Acc:HGNC:1682] |   |     |
| - 3160 3462 3154 2333 3215 2524                                 |   |     |

|                                    |                                                        |                |                                |             |             |
|------------------------------------|--------------------------------------------------------|----------------|--------------------------------|-------------|-------------|
| 21.01095965                        | 18.55774124                                            | 17.76348764    | 13.71450221                    |             |             |
| 17.03349112                        | 14.32515995                                            |                |                                |             |             |
| ENSG00000114853                    | 410.7213949                                            | 366.1457006    | 488.8992081                    |             |             |
| 632.8842799                        | 487.0873147                                            | 729.043131     | 421.9221012                    |             |             |
| 616.3382418                        | -0.546473329                                           | 0.012304167    | 0.07060602                     | ZBTB47      |             |
| 3                                  | 42653684                                               | 42665854       | + 3781                         |             |             |
| protein_coding                     | zinc finger and BTB domain containing 47 [Source:HGNC  |                |                                |             |             |
| Symbol;Acc:HGNC:26955]             | ZBTB                                                   | 355 395        | 500 630                        | 533         |             |
| 743                                | 5.134715534                                            | 4.606004694    | 6.125841882                    |             |             |
| 8.056289955                        | 6.142980397                                            | 9.173354401    |                                |             |             |
| ENSG00000095303                    | 25.45315687                                            | 25.0276808     | 29.33395248                    |             |             |
| 1.004578222                        | 6.397019142                                            | 7.849724156    | 26.60493005                    |             |             |
| 5.08377384                         | 2.383206212                                            | 0.012304209    | 0.07060602                     | PTGS1       |             |
| 9                                  | 122370530                                              | 122395703      | + 5791                         |             |             |
| protein_coding                     | prostaglandin-endoperoxide synthase 1 [Source:HGNC     |                |                                |             |             |
| Symbol;Acc:HGNC:9604]              | -                                                      | 22 27          | 30 1                           | 7           |             |
| 8                                  | 0.207760905                                            | 0.205562626    | 0.239977291                    |             |             |
| 0.008349254                        | 0.052674822                                            | 0.064488527    |                                |             |             |
| ENSG00000186814                    | 380.6403913                                            | 305.8938765    | 254.2275882                    |             |             |
| 460.0968257                        | 526.3832894                                            | 414.0729492    | 313.5872853                    |             |             |
| 466.8510214                        | -0.575897715                                           | 0.01231102     | 0.070618597                    |             |             |
| ZSCAN30 18                         | 35251058                                               | 35290245       | - 8271                         |             |             |
| protein_coding                     | zinc finger and SCAN domain containing 30 [Source:HGNC |                |                                |             |             |
| Symbol;Acc:HGNC:33517]             | zf-C2H2                                                | 329 330        | 260 458                        | 576         |             |
| 422                                | 2.175367269                                            | 1.759097361    | 1.456189124                    |             |             |
| 2.677371732                        | 3.03475098                                             | 2.381773539    |                                |             |             |
| ENSG00000107902                    | 175.8581747                                            | 172.4129122    | 198.4930785                    |             |             |
| 76.34794487                        | 104.180026                                             | 129.5204486    | 182.2547218                    |             |             |
| 103.3494732                        | 0.818157033                                            | 0.012331384    | 0.070708878                    | LHPP        |             |
| 10                                 | 124461834                                              | 124617888      | + 4064                         |             |             |
| protein_coding                     | phospholysine phosphohistidine inorganic pyrophosphate |                |                                |             |             |
| phosphatase [Source:HGNC           | Symbol;Acc:HGNC:30042]                                 | -              | 152                            | 186         |             |
| 203                                | 76 114                                                 | 132            | 2.045429906                    | 2.017870089 |             |
| 2.31390111                         | 0.904192935                                            | 1.222389891    | 1.516234128                    |             |             |
| ENSG00000079313                    | 783.2630545                                            | 1147.565512    | 1423.674494                    |             |             |
| 1584.219856                        | 1500.557919                                            | 1645.498426    | 1118.167687                    |             |             |
| 1576.758734                        | -0.494957579                                           | 0.012342766    | 0.070747604                    | REX01       |             |
| 19                                 | 1815246 1848463                                        | - 5561         | protein_coding                 | RNA         |             |
| exonuclease 1 homolog [Source:HGNC | Symbol;Acc:HGNC:24616]                                 | -              |                                |             |             |
| 677                                | 1238 1456                                              | 1577           | 1642                           | 1677        | 6.657796037 |
| 9.815257724                        | 12.12860733                                            | 13.71134362    | 12.86704606                    |             |             |
| 14.07752163                        |                                                        |                |                                |             |             |
| ENSG00000051180                    | 3.470885027                                            | 6.488657986    | 13.68917783                    | 0           |             |
| 0                                  | 0                                                      | 7.882906946    | 0                              | 5.473829751 |             |
| 0.012344394                        | 1                                                      | RAD51 15       | 40694774                       | 40732339    |             |
| +                                  | 3046                                                   | protein_coding | RAD51 recombinase [Source:HGNC |             |             |
| Symbol;Acc:HGNC:9817]              | -                                                      | 3              | 7                              | 14          | 0           |
| 0                                  | 0.053862446                                            | 0.101321614    | 0.212912222                    | 0           |             |
| 0                                  | 0                                                      |                |                                |             |             |
| ENSG00000105835                    | 6799.463768                                            | 7582.460332    | 4054.930032                    |             |             |

|                                     |                                                       |                           |                                     |                |
|-------------------------------------|-------------------------------------------------------|---------------------------|-------------------------------------|----------------|
| 7541.368713                         | 10952.61063                                           | 7741.790449               | 6145.618044                         |                |
| 8745.256597                         | -0.508998872                                          | 0.0123823                 | 0.07094761                          | NAMPT          |
| 7                                   | 106248285                                             | 106286326                 | - 9049                              |                |
| protein_coding                      | nicotinamide                                          | phosphoribosyltransferase | [Source:HGNC                        |                |
| Symbol;Acc:HGNC:30092]              | -                                                     | 5877 8180                 | 4147 7507                           | 11985          |
| 7890                                | 35.51810733                                           | 39.85535423               | 21.22931118                         |                |
| 40.11132831                         | 57.7159765                                            | 40.70262801               |                                     |                |
| ENSG00000149761                     | 322.7923075                                           | 486.6493489               | 501.6105875                         |                |
| 595.7148857                         | 556.5406653                                           | 809.5028036               | 437.0174147                         |                |
| 653.9194515                         | -0.579799439                                          | 0.012388593               | 0.070957069                         | NUDT22         |
| 11                                  | 64225941                                              | 64230686                  | + 3721                              |                |
| protein_coding                      | nudix hydrolase                                       | 22                        | [Source:HGNC Symbol;Acc:HGNC:28189] |                |
| -                                   | 279 525                                               | 513 593                   | 609 825                             |                |
| 4.100522941                         | 6.22061884                                            | 6.38645933                | 7.705418652                         |                |
| 7.132080236                         | 10.34999916                                           |                           |                                     |                |
| ENSG00000119559                     | 536.8302175                                           | 661.8431146               | 847.7512268                         |                |
| 951.3355763                         | 867.2530237                                           | 1070.506132               | 682.1415196                         |                |
| 963.0315772                         | -0.496502524                                          | 0.012413008               | 0.071070281                         |                |
| C19orf25                            | 19 1461143                                            | 1479556 -                 | 5111                                | protein_coding |
|                                     | chromosome 19 open reading frame 25 [Source:HGNC      |                           |                                     |                |
| Symbol;Acc:HGNC:26711]              | -                                                     | 464 714                   | 867 947                             | 949            |
| 1091                                | 4.964857778                                           | 6.159228111               | 7.858066003                         |                |
| 8.95870662                          | 8.091311653                                           | 9.964715539               |                                     |                |
| ENSG00000275966                     | 0 5.561706845                                         | 23.46716199               | 0 0                                 |                |
| 0                                   | 9.676289611                                           | 0 5.770040158             | 0.012427221                         |                |
| 1                                   | AC110285.6                                            | 17 81345476               | 81345966                            |                |
| -                                   | 491                                                   | lincRNA novel transcript  |                                     | - 0            |
| 6                                   | 24 0                                                  | 0 0                       | 0                                   | 0.538770386    |
| 2.264290818                         | 0                                                     | 0 0                       |                                     |                |
| ENSG00000064607                     | 2563.827073                                           | 2224.682738               | 2546.187076                         |                |
| 2241.214013                         | 1656.827958                                           | 1670.028814               | 2444.898962                         |                |
| 1856.023595                         | 0.397587006                                           | 0.012433188               | 0.071159169                         | SUGP2          |
| 19                                  | 18990888                                              | 19034023                  | - 8468                              |                |
| protein_coding                      | SURP and G-patch domain containing 2 [Source:HGNC     |                           |                                     |                |
| Symbol;Acc:HGNC:18641]              | -                                                     | 2216 2400                 | 2604 2231                           | 1813           |
| 1702                                | 14.3114494                                            | 12.49580819               | 14.24500436                         |                |
| 12.73854828                         | 9.329869142                                           | 9.382633279               |                                     |                |
| ENSG00000185774                     | 145.7771711                                           | 90.8412118                | 88.00185745                         |                |
| 213.9751613                         | 256.7946256                                           | 131.4828796               | 108.2067468                         |                |
| 200.7508888                         | -0.895362056                                          | 0.012466079               | 0.071291007                         | KCNIP4         |
| 4                                   | 20728616                                              | 21948799                  | - 4256                              |                |
| protein_coding                      | potassium voltage-gated channel interacting protein 4 |                           |                                     |                |
| [Source:HGNC Symbol;Acc:HGNC:30083] | -                                                     |                           | 126 98                              | 90             |
| 213                                 | 281 134                                               | 1.619062592               | 1.015215908                         |                |
| 0.979587751                         | 2.419798486                                           | 2.87715526                | 1.469769446                         |                |
| ENSG00000105426                     | 826.0706365                                           | 907.4851669               | 1388.473751                         |                |
| 846.8594412                         | 616.8554173                                           | 679.0011395               | 1040.676518                         |                |
| 714.238666                          | 0.543721278                                           | 0.012473262               | 0.071291007                         | PTPRS          |
| 19                                  | 5158495 5340803                                       | - 8565                    |                                     |                |
| protein_coding                      | "protein tyrosine phosphatase, receptor type S        |                           |                                     |                |



|                                     |                                                |              |              |             |
|-------------------------------------|------------------------------------------------|--------------|--------------|-------------|
| [Source:HGNC Symbol;Acc:HGNC:9681]" | -                                              | 714          | 979          | 1420        |
| 843                                 | 675                                            | 692          | 4.558957643  | 5.039521269 |
| 7.680039132                         | 4.758843511                                    | 3.434274485  | 3.771592496  |             |
| ENSG00000269973                     | 127.2657843                                    | 160.3625474  | 126.1359957  |             |
| 245.1170862                         | 234.8619885                                    | 197.2243194  | 137.9214425  |             |
| 225.7344647                         | -0.709518642                                   | 0.012475061  | 0.071291007  |             |
| AC010969.2                          | 2                                              | 9936360      | 9939590      | +           |
| transcript                          | -                                              | 110          | 173          | 129         |
| 1.861874654                         | 2.360712519                                    | 1.849503715  | 3.651355218  |             |
| 3.46620914                          | 2.904056993                                    |              |              |             |
| ENSG00000203724                     | 127.2657843                                    | 131.627062   | 175.0259165  |             |
| 88.40288354                         | 77.67808958                                    | 70.6475174   | 144.6395876  |             |
| 78.90949684                         | 0.87509655                                     | 0.012476257  | 0.071291007  |             |
| C1orf53 1                           | 197902647                                      | 197907367    | +            | 611         |
| protein_coding                      | chromosome 1 open reading frame                | 53           | [Source:HGNC |             |
| Symbol;Acc:HGNC:30003]              | -                                              | 110          | 142          | 179         |
| 72                                  | 9.845690683                                    | 10.24663089  | 13.57107581  | 85          |
| 6.963742094                         | 6.062284493                                    | 5.500945244  |              |             |
| ENSG00000188786                     | 942.9237657                                    | 1033.550522  | 996.3765861  |             |
| 1506.867333                         | 1192.58714                                     | 1224.556968  | 990.9502913  |             |
| 1308.003814                         | -0.400009299                                   | 0.01247954   | 0.071291007  | MTF1        |
| 1                                   | 37809567                                       | 37859620     | -            | 8024        |
| protein_coding                      | metal regulatory transcription factor 1        | [Source:HGNC |              |             |
| Symbol;Acc:HGNC:7428]               | zf-C2H2                                        | 815          | 1115         | 1019        |
| 1248                                | 5.554710144                                    | 6.126577129  | 5.882822161  | 1305        |
| 9.038608081                         | 7.087257128                                    | 7.26055302   |              |             |
| ENSG00000140688                     | 741.6124341                                    | 858.3567564  | 785.1721282  |             |
| 969.4179843                         | 1039.97254                                     | 1151.94702   | 795.0471062  |             |
| 1053.779182                         | -0.405979234                                   | 0.012489249  | 0.071319819  |             |
| C16orf58                            | 16                                             | 31489471     | 31509309     | -           |
| protein_coding                      | chromosome 16 open reading frame               | 58           |              |             |
| [Source:HGNC Symbol;Acc:HGNC:25848] | -                                              | 641          | 926          | 803         |
| 965                                 | 1138                                           | 1174         | 9.657086406  | 11.24704207 |
| 10.24734543                         | 12.85351488                                    | 13.6613694   | 15.09758585  |             |
| ENSG00000165526                     | 1053.992087                                    | 1103.071858  | 1149.890937  |             |
| 1522.940585                         | 1293.111727                                    | 1463.973555  | 1102.318294  |             |
| 1426.675289                         | -0.371735563                                   | 0.012499579  | 0.071352155  | RPUSD4      |
| 11                                  | 126202094                                      | 126211692    | -            | 4083        |
| protein_coding                      | RNA pseudouridylate synthase domain containing | 4            |              |             |
| [Source:HGNC Symbol;Acc:HGNC:25898] | -                                              | 911          | 1190         | 1176        |
| 1516                                | 1415                                           | 1492         | 12.20207555  | 12.84995301 |
| 13.34229066                         | 17.95233889                                    | 15.10204144  | 17.05828944  |             |
| ENSG00000161980                     | 563.4403361                                    | 670.1856748  | 616.0130022  |             |
| 371.6939421                         | 453.2744992                                    | 489.6265442  | 616.5463377  |             |
| 438.1983285                         | 0.492953943                                    | 0.012506905  | 0.071367323  | POLR3K      |
| 16                                  | 46407                                          | 53628        | -            | 1889        |
| polymerase III subunit K            | [Source:HGNC Symbol;Acc:HGNC:14121]            | -            |              |             |
| 487                                 | 723                                            | 630          | 370          | 496         |
| 16.87486462                         | 15.44937971                                    | 9.470458005  | 11.4421679   |             |
| 12.33146355                         |                                                |              |              |             |

|                                                              |                                                   |                                       |             |             |                |             |
|--------------------------------------------------------------|---------------------------------------------------|---------------------------------------|-------------|-------------|----------------|-------------|
| ENSG0000050820                                               | 2873.892802                                       | 4659.783385                           | 4612.275129 |             |                |             |
| 5289.104339                                                  | 5983.040617                                       | 5164.137279                           | 4048.650439 |             |                |             |
| 5478.760745                                                  | -0.436115301                                      | 0.012530355                           | 0.071474455 | BCAR1       |                |             |
| 16                                                           | 75228187                                          | 75268053                              | -           | 9178        |                |             |
| protein_coding                                               | "BCAR1, Cas family scaffold protein [Source:HGNC  |                                       |             |             |                |             |
| Symbol;Acc:HGNC:971]"                                        | -                                                 | 2484                                  | 5027        | 4717        | 5265           | 6547        |
| 5263                                                         | 14.80124512                                       | 24.14875747                           | 23.80785554 |             |                |             |
| 27.7364924                                                   | 31.08514413                                       | 26.76895098                           |             |             |                |             |
| ENSG00000198857                                              | 155.0328645                                       | 234.5186386                           | 151.5587545 |             |                |             |
| 299.3643102                                                  | 278.7272626                                       | 289.4585782                           | 180.3700859 |             |                |             |
| 289.1833837                                                  | -0.678947033                                      | 0.01255028                            | 0.071561406 |             |                |             |
| HSD3BP5 1                                                    | 119601340                                         | 119609250                             | +           | 1132        |                |             |
| transcribed_unprocessed_pseudogene                           | "hydroxy-delta-5-steroid                          |                                       |             |             |                |             |
| dehydrogenase, 3 beta, pseudogene 5 [Source:HGNC             |                                                   |                                       |             |             |                |             |
| Symbol;Acc:HGNC:5223]"                                       | -                                                 | 134                                   | 253         | 155         | 298            | 305         |
| 295                                                          | 6.473707669                                       | 9.853897769                           | 6.342897993 |             |                |             |
| 12.72831907                                                  | 11.74118714                                       | 12.16526643                           |             |             |                |             |
| ENSG00000148498                                              | 1242.57684                                        | 1162.396731                           | 1142.06855  |             |                |             |
| 868.960162                                                   | 866.3391638                                       | 985.1403815                           | 1182.347373 |             |                |             |
| 906.8132358                                                  | 0.38259963                                        | 0.012564746                           | 0.071617177 | PARD3       |                |             |
| 10                                                           | 34109560                                          | 34815325                              | -           | 6513        |                |             |
| protein_coding                                               | par-3 family cell polarity regulator [Source:HGNC |                                       |             |             |                |             |
| Symbol;Acc:HGNC:16051]"                                      | -                                                 | 1074                                  | 1254        | 1168        | 865            | 948         |
| 1004                                                         | 9.018159577                                       | 8.488880428                           | 8.30738275  |             |                |             |
| 6.421496435                                                  | 6.342870679                                       | 7.196124533                           |             |             |                |             |
| ENSG00000189067                                              | 5.784808379                                       | 0                                     | 23.46716199 | 0           | 0              |             |
| 0                                                            | 9.750656789                                       | 0                                     | 5.778761973 | 0.01257615  |                |             |
| 1                                                            | LITAF 16                                          | 11547722                              | 11636381    | -           |                |             |
| 5060                                                         | protein_coding                                    | lipopolysaccharide induced TNF factor |             |             |                |             |
| [Source:HGNC Symbol;Acc:HGNC:16841]"                         |                                                   | zf-LITAF-like                         | 5           | 0           |                |             |
| 24                                                           | 0                                                 | 0                                     | 0           | 0.054039858 | 0              |             |
| 0.219716757                                                  | 0                                                 | 0                                     | 0           |             |                |             |
| ENSG00000280070                                              | 8.09873173                                        | 9.269511408                           | 11.73358099 | 0           |                |             |
| 0.913859877                                                  | 0                                                 | 9.700608044                           | 0.304619959 |             |                |             |
| 4.80996999                                                   | 0.012577324                                       | 1                                     | AL049833.3  | 14          |                |             |
| 96992864                                                     | 96996601                                          | +                                     | 3738        | TEC         | TEC            | -           |
| 7                                                            | 10                                                | 12                                    | 0           | 1           | 0              | 0.102412615 |
| 0.117949108                                                  | 0.148711449                                       | 0                                     | 0.011657872 | 0           |                |             |
| ENSG00000141503                                              | 1433.475516                                       | 2567.65466                            | 2138.445136 |             |                |             |
| 2564.688201                                                  | 2797.325085                                       | 3178.157068                           | 2046.525104 |             |                |             |
| 2846.723451                                                  | -0.475538266                                      | 0.012588829                           | 0.071722691 | MINK1       |                |             |
| 17                                                           | 4833388                                           | 4898061                               | +           | 7817        | protein_coding |             |
| misshapen like kinase 1 [Source:HGNC Symbol;Acc:HGNC:17565]" |                                                   |                                       |             |             |                | -           |
| 1239                                                         | 2770                                              | 2187                                  | 2553        | 3061        | 3239           | 8.668139803 |
| 15.62333032                                                  | 12.96018279                                       | 15.79108311                           | 17.06403823 |             |                |             |
| 19.34269001                                                  |                                                   |                                       |             |             |                |             |
| ENSG00000115317                                              | 327.4201542                                       | 440.3017919                           | 356.8964219 |             |                |             |
| 478.1792337                                                  | 547.4020666                                       | 593.6353893                           | 374.8727893 |             |                |             |
| 539.7388965                                                  | -0.52471616                                       | 0.012592641                           | 0.071722691 | HTRA2       |                |             |
| 2                                                            | 74529377                                          | 74533348                              | +           | 3001        |                |             |

|                                 |                                                |             |             |      |             |        |  |
|---------------------------------|------------------------------------------------|-------------|-------------|------|-------------|--------|--|
| protein_coding                  | HtrA serine peptidase 2 [Source:HGNC           |             |             |      |             |        |  |
| Symbol;Acc:HGNC:14348]          | -                                              | 283         | 475         | 365  | 476         | 599    |  |
| 605                             | 5.157213999                                    | 6.978491794 | 5.634161931 |      |             |        |  |
| 7.669060675                     | 8.698000428                                    | 9.410992235 |             |      |             |        |  |
| ENSG00000112276                 | 362.1290045                                    | 294.7704628 | 261.0721771 |      |             |        |  |
| 209.9568484                     | 207.4461922                                    | 171.7127159 | 305.9905481 |      |             |        |  |
| 196.3719188                     | 0.638615562                                    | 0.012613603 | 0.071815327 |      |             | BVES   |  |
| 6                               | 105096822                                      | 105137174   | -           | 5808 |             |        |  |
| protein_coding                  | blood vessel epicardial substance [Source:HGNC |             |             |      |             |        |  |
| Symbol;Acc:HGNC:1152]           | -                                              | 313         | 318         | 267  | 209         | 227    |  |
| 175                             | 2.947219233                                    | 2.413984461 | 2.129546411 |      |             |        |  |
| 1.739886406                     | 1.703169406                                    | 1.406557455 |             |      |             |        |  |
| ENSG00000123427                 | 423.4479733                                    | 337.4102153 | 331.4736631 |      |             |        |  |
| 216.988896                      | 261.3639249                                    | 249.2287419 | 364.1106172 |      |             |        |  |
| 242.5271876                     | 0.584740382                                    | 0.012633606 | 0.071902436 |      |             |        |  |
| EEF1AKMT3                       | 12                                             | 57771492    | 57782541    | +    | 3172        |        |  |
| protein_coding                  | EEF1A lysine methyltransferase 3 [Source:HGNC  |             |             |      |             |        |  |
| Symbol;Acc:HGNC:24936]          | -                                              | 366         | 364         | 339  | 216         | 286    |  |
| 254                             | 6.310192665                                    | 5.059436657 | 4.950726964 |      |             |        |  |
| 3.292469716                     | 3.929085253                                    | 3.738062632 |             |      |             |        |  |
| ENSG00000125485                 | 857.3086017                                    | 875.9688281 | 864.3737999 |      |             |        |  |
| 1237.64037                      | 1159.688184                                    | 1013.595632 | 865.8837432 |      |             |        |  |
| 1136.974729                     | -0.392865355                                   | 0.012640034 | 0.071905266 |      |             | DDX31  |  |
| 9                               | 132592997                                      | 132670401   | -           | 5546 |             |        |  |
| protein_coding                  | DEAD-box helicase 31 [Source:HGNC              |             |             |      |             |        |  |
| Symbol;Acc:HGNC:16715]          | -                                              | 741         | 945         | 884  | 1232        | 1269   |  |
| 1033                            | 7.306898178                                    | 7.512524498 | 7.383713815 |      |             |        |  |
| 10.74068696                     | 9.971037615                                    | 8.694938051 |             |      |             |        |  |
| ENSG00000163655                 | 4898.575735                                    | 5042.614206 | 4667.03184  |      |             |        |  |
| 3579.312205                     | 4138.871385                                    | 4060.26982  | 4869.407261 |      |             |        |  |
| 3926.151136                     | 0.310574422                                    | 0.012643511 | 0.071905266 |      |             | GMPS   |  |
| 3                               | 155870536                                      | 155944026   | +           | 8885 |             |        |  |
| protein_coding                  | guanine monophosphate synthase [Source:HGNC    |             |             |      |             |        |  |
| Symbol;Acc:HGNC:4378]           | -                                              | 4234        | 5440        | 4773 | 3563        | 4529   |  |
| 4138                            | 26.06082346                                    | 26.99450856 | 24.88493198 |      |             |        |  |
| 19.38918733                     | 22.2128092                                     | 21.74097867 |             |      |             |        |  |
| ENSG00000174365                 | 166.6024813                                    | 190.0249839 | 259.1165803 |      |             |        |  |
| 366.671051                      | 337.2142948                                    | 272.7779144 | 205.2480152 |      |             |        |  |
| 325.5544201                     | -0.664187502                                   | 0.012703703 | 0.072220716 |      |             | SNHG11 |  |
| 20                              | 38446578                                       | 38450921    | +           | 2813 |             |        |  |
| processed_transcript            | small nucleolar RNA host gene 11 [Source:HGNC  |             |             |      |             |        |  |
| Symbol;Acc:HGNC:25046]          | -                                              | 144         | 205         | 265  | 365         | 369    |  |
| 278                             | 2.799545128                                    | 3.213054461 | 4.363938259 |      |             |        |  |
| 6.273708686                     | 5.716302877                                    | 4.613399876 |             |      |             |        |  |
| ENSG00000006194                 | 693.0200438                                    | 910.2660203 | 850.6846221 |      |             |        |  |
| 1216.544227                     | 1215.433637                                    | 929.2110969 | 817.9902287 |      |             |        |  |
| 1120.39632                      | -0.453114099                                   | 0.012715799 | 0.072262608 |      |             | ZNF263 |  |
| 16                              | 3263800                                        | 3301401     | +           | 6945 |             |        |  |
| protein_coding                  | zinc                                           |             |             |      |             |        |  |
| finger protein 263 [Source:HGNC | Symbol;Acc:HGNC:13056]                         | zf-C2H2     | 599         |      |             |        |  |
| 982                             | 870                                            | 1211        | 1330        | 947  | 4.716819802 |        |  |

|                                                  |                                                   |             |                           |             |                |
|--------------------------------------------------|---------------------------------------------------|-------------|---------------------------|-------------|----------------|
| 6.234091836                                      | 5.802958415                                       | 8.430883916 | 8.345223813               |             |                |
| 6.365371639                                      |                                                   |             |                           |             |                |
| ENSG00000258857                                  | 0                                                 | 0           | 1.955596832               | 9.041203998 |                |
| 17.36333767                                      | 11.77458623                                       | 0.651865611 |                           |             |                |
| 12.72637597                                      | -4.258729205                                      | 0.012737417 | 1                         | AL359397.1  |                |
| 14                                               | 50397013                                          | 50398345    | +                         | 501         |                |
| lincRNA novel transcript                         |                                                   | -           | 0                         | 0           | 2              |
| 19                                               | 12                                                | 0           | 0                         | 0.184924616 | 0.86857235     |
| 1.652625588                                      | 1.118122935                                       |             |                           |             |                |
| ENSG00000126458                                  | 450.0580919                                       | 706.3367693 | 517.2553621               |             |                |
| 681.1040345                                      | 892.8411002                                       | 837.9580536 | 557.8834078               |             |                |
| 803.9677295                                      | -0.526106122                                      | 0.012744164 | 0.072396892               | RRAS        |                |
| 19                                               | 49635292                                          | 49640201    | -                         | 1160        |                |
| protein_coding                                   | RAS related [Source:HGNC Symbol;Acc:HGNC:10447] - |             |                           |             |                |
| 389                                              | 762                                               | 529         | 678                       | 977         | 854            |
| 28.96215944                                      | 21.1251664                                        | 28.26004969 | 36.70245985               |             |                |
| 34.36733983                                      |                                                   |             |                           |             |                |
| ENSG00000118939                                  | 74.04554725                                       | 100.1107232 | 132.9805846               |             |                |
| 23.10529911                                      | 60.31475191                                       | 50.04199149 | 102.3789517               |             |                |
| 44.4873475                                       | 1.201658198                                       | 0.012759472 | 0.072456927               | UCHL3       |                |
| 13                                               | 75549480                                          | 75606020    | +                         | 1905        |                |
| protein_coding                                   | ubiquitin C-terminal hydrolase L3 [Source:HGNC    |             |                           |             |                |
| Symbol;Acc:HGNC:12515]                           | -                                                 | 64          | 108                       | 136         | 23             |
| 51                                               | 1.837298442                                       | 2.499555208 | 3.307092818               | 66          |                |
| 0.58375965                                       | 1.509758743                                       | 1.249744494 |                           |             |                |
| ENSG00000134668                                  | 588.8934929                                       | 1043.746985 | 539.7447257               |             |                |
| 936.2669029                                      | 1571.838989                                       | 903.6994934 | 724.1284011               |             |                |
| 1137.268462                                      | -0.650764427                                      | 0.012772477 | 0.072503846               | SPOCD1      |                |
| 1                                                | 31790422                                          | 31816051    | -                         | 7085        |                |
| protein_coding                                   | SPOC domain containing 1 [Source:HGNC             |             |                           |             |                |
| Symbol;Acc:HGNC:26338]                           | -                                                 | 509         | 1126                      | 552         | 932            |
| 921                                              | 3.928915066                                       | 7.007006073 | 3.609122965               | 1720        |                |
| 6.360295218                                      | 10.57906267                                       | 6.068282792 |                           |             |                |
| ENSG00000158042                                  | 1384.883126                                       | 1563.766575 | 1282.871522               |             |                |
| 1725.865385                                      | 1713.48727                                        | 2078.21447  | 1410.507074               |             |                |
| 1839.189042                                      | -0.382631794                                      | 0.012782742 | 0.072535182               | MRPL17      |                |
| 11                                               | 6680782                                           | 6683401     | -                         | 2276        | protein_coding |
| mitochondrial ribosomal protein L17 [Source:HGNC |                                                   |             |                           |             |                |
| Symbol;Acc:HGNC:14053]                           | -                                                 | 1197        | 1687                      | 1312        | 1718           |
| 2118                                             | 28.76183599                                       | 32.67960382 | 26.70324455               | 1875        |                |
| 36.49657567                                      | 35.89943488                                       | 43.44099198 |                           |             |                |
| ENSG00000207750                                  | 15.04050178                                       | 3.707804563 | 4.888992081               | 0           |                |
| 0                                                | 0                                                 | 7.879099476 | 0                         | 5.466368529 |                |
| 0.012797374                                      | 1                                                 | MIR553      | 1                         | 100281241   | 100281308      |
| +                                                | 68                                                | miRNA       | microRNA 553 [Source:HGNC |             |                |
| Symbol;Acc:HGNC:32809]                           | -                                                 | 13          | 4                         | 5           | 0              |
| 0                                                | 10.45512314                                       | 2.59349274  | 3.406148258               | 0           |                |
| 0                                                | 0                                                 |             |                           |             |                |
| ENSG00000167977                                  | 817.9719047                                       | 1345.006105 | 1105.890009               |             |                |
| 1643.489971                                      | 1509.696517                                       | 1373.701727 | 1089.622673               |             |                |

|                                                                    |              |             |             |                         |
|--------------------------------------------------------------------|--------------|-------------|-------------|-------------------------|
| 1508.962739                                                        | -0.468733946 | 0.012802134 | 0.072618265 | KCTD5                   |
| 16                                                                 | 2682475      | 2709030 +   | 3420        | protein_coding          |
| potassium channel tetramerization domain containing 5 [Source:HGNC |              |             |             |                         |
| Symbol;Acc:HGNC:21423]                                             | -            | 707         | 1451        | 1131 1636 1652          |
| 1400                                                               | 11.30545434  | 18.70575597 | 15.31930118 |                         |
| 23.12908274                                                        | 21.04953637  | 19.10944023 |             |                         |
| ENSG00000182118                                                    | 325.1062309  | 383.7577723 | 351.0296314 |                         |
| 414.8908057                                                        | 621.4247166  | 514.1569322 | 353.2978782 |                         |
| 516.8241515                                                        | -0.548567592 | 0.012816944 | 0.072675304 | FAM89A                  |
| 1                                                                  | 231018958    | 231040246   | -           | 2394                    |
| protein_coding family with sequence similarity 89 member A         |              |             |             |                         |
| [Source:HGNC Symbol;Acc:HGNC:25057]                                | -            | 281         | 414         | 359                     |
| 413                                                                | 680          | 524         | 6.419140575 | 7.624478656             |
| 6.946607459                                                        | 8.341172871  | 12.37779724 | 10.21770069 |                         |
| ENSG00000103326                                                    | 1877.7488    | 2727.090256 | 3576.786606 |                         |
| 4227.265158                                                        | 3098.898844  | 4293.799113 | 2727.208554 |                         |
| 3873.321039                                                        | -0.505752265 | 0.012896944 | 0.073101811 | CAPN15                  |
| 16                                                                 | 527717       | 554636 +    | 7987        | protein_coding          |
| calpain 15 [Source:HGNC Symbol;Acc:HGNC:11182] Others 1623 2942    |              |             |             |                         |
| 3658                                                               | 4208         | 3391        | 4376        | 11.11295481 16.24025866 |
| 21.21594948                                                        | 25.47377234  | 18.5013195  | 25.57641468 |                         |
| ENSG00000225200                                                    | 27.76708022  | 45.4206059  | 32.26734773 |                         |
| 75.34336665                                                        | 83.16124884  | 80.4596726  | 35.15167795 |                         |
| 79.6547627                                                         | -1.176140735 | 0.01290754  | 0.073134751 |                         |
| AC246787.1                                                         | 14           | 105978520   | 105979146   | - 627                   |
| processed_pseudogene ribosomal protein S8 (RPS8) pseudogene        |              |             |             |                         |
| -                                                                  | 24           | 49          | 33 75       | 91 82                   |
| 2.093333452                                                        | 3.445581264  | 2.438085069 | 5.78355592  |                         |
| 6.324591051                                                        | 6.105093891  |             |             |                         |
| ENSG00000099326                                                    | 592.364378   | 786.0545674 | 656.1027372 |                         |
| 1063.848337                                                        | 733.8294816  | 1081.299502 | 678.1738942 |                         |
| 959.659107                                                         | -0.499807016 | 0.012922614 | 0.073193035 | MZF1                    |
| 19                                                                 | 58561931     | 58573575    | -           | 6691                    |
| protein_coding myeloid zinc finger 1 [Source:HGNC                  |              |             |             |                         |
| Symbol;Acc:HGNC:13108]                                             | zf-C2H2      | 512         | 848         | 671 1059 803            |
| 1102                                                               | 4.184789755  | 5.587773328 | 4.645515849 |                         |
| 7.652549487                                                        | 5.229776306  | 7.688411161 |             |                         |
| ENSG00000231628                                                    | 6.941770054  | 16.68512054 | 5.866790497 | 0                       |
| 0.913859877                                                        | 0            | 9.831227029 | 0.304619959 |                         |
| 4.830909756                                                        | 0.01295479   | 1           | AL133406.2  | 6                       |
| 105279016                                                          | 105281755    | +           | 1198        | antisense novel         |
| transcript                                                         | -            | 6           | 18          | 6 0 1 0                 |
| 0.273898179                                                        | 0.662444723  | 0.232004756 | 0           |                         |
| 0.036374898                                                        | 0            |             |             |                         |
| ENSG00000081692                                                    | 126.1088227  | 210.417909  | 159.3811418 |                         |
| 205.9385355                                                        | 277.8134027  | 357.1624491 | 165.3026245 |                         |
| 280.3047958                                                        | -0.759659463 | 0.012955779 | 0.073353699 | JMJD4                   |
| 1                                                                  | 227730425    | 227735411   | -           | 4315                    |
| protein_coding jumonji domain containing 4 [Source:HGNC            |              |             |             |                         |
| Symbol;Acc:HGNC:25724]                                             | -            | 109         | 227         | 163 205 304             |

|                                     |                                                       |                      |                      |        |
|-------------------------------------|-------------------------------------------------------|----------------------|----------------------|--------|
| 364                                 | 1.381466668                                           | 2.319417957          | 1.749884             |        |
| 2.297070252                         | 3.070091939                                           | 3.937917555          |                      |        |
| ENSG00000142227                     | 4347.861977                                           | 5761.928292          | 5571.495375          |        |
| 5985.277047                         | 6479.266531                                           | 7992.000406          | 5227.095215          |        |
| 6818.847995                         | -0.383327641                                          | 0.012980547          | 0.073466723          | EMP3   |
| 19                                  | 48321509                                              | 48330553             | + 1667               |        |
| protein_coding                      | epithelial membrane protein 3 [Source:HGNC            |                      |                      |        |
| Symbol;Acc:HGNC:3335]               | -                                                     | 3758 6216            | 5698 5958            | 7090   |
| 8145                                | 123.2866037                                           | 164.4028583          | 158.3395115          |        |
| 172.8089039                         | 185.3400318                                           | 228.0875208          |                      |        |
| ENSG00000183647                     | 455.8429002                                           | 373.5613098          | 428.2757063          |        |
| 215.9843177                         | 268.674804                                            | 344.4066473          | 419.2266388          |        |
| 276.3552563                         | 0.600492026                                           | 0.01301055           | 0.073609281          | ZNF530 |
| 19                                  | 57599885                                              | 57612722             | + 5019               |        |
| protein_coding                      | zinc finger protein 530 [Source:HGNC                  |                      |                      |        |
| Symbol;Acc:HGNC:29297]              | zf-C2H2                                               | 394 403              | 438 215              | 294    |
| 351                                 | 4.293127028                                           | 3.540151178          | 4.042586959          |        |
| 2.071202114                         | 2.552635075                                           | 3.264644955          |                      |        |
| ENSG00000139178                     | 185.1138681                                           | 152.0199871          | 146.6697624          |        |
| 223.0163653                         | 324.4202565                                           | 235.4917247          | 161.2678725          |        |
| 260.9761155                         | -0.696618802                                          | 0.013028409          | 0.073683053          | C1RL   |
| 12                                  | 7089587 7109273                                       | - 5014               | protein_coding       |        |
| complement C1r                      | subcomponent like [Source:HGNC Symbol;Acc:HGNC:21265] |                      |                      |        |
| -                                   | 160 164                                               | 150 222              | 355 240              |        |
| 1.745140373                         | 1.442093689                                           | 1.385828171          | 2.140769267          |        |
| 3.085337098                         | 2.234461869                                           |                      |                      |        |
| ENSG00000253626                     | 463.941632                                            | 359.6570426          | 355.9186235          |        |
| 200.9156444                         | 327.1618361                                           | 227.6420005          | 393.1724327          |        |
| 251.9064937                         | 0.640353186                                           | 0.013045171          | 0.073750567          |        |
| EIF5AL1 10                          | 79512601                                              | 79516440             | + 3840               |        |
| protein_coding                      | eukaryotic translation initiation factor 5A-like 1    |                      |                      |        |
| [Source:HGNC Symbol;Acc:HGNC:17419] | -                                                     | 401 388              | 364                  |        |
| 200                                 | 358 232                                               | 5.710943466          | 4.454864092          |        |
| 4.391092796                         | 2.51825664                                            | 4.062659269          | 2.820348634          |        |
| ENSG00000152104                     | 5762.826107                                           | 4096.197091          | 5807.144794          |        |
| 3813.378931                         | 3358.43505                                            | 4585.220122          | 5222.055997          |        |
| 3919.011368                         | 0.414047404                                           | 0.013102396          | 0.074046704          | PTPN14 |
| 1                                   | 214348696                                             | 214552449            | - 18756              |        |
| protein_coding                      | "protein tyrosine phosphatase, non-receptor type 14   |                      |                      |        |
| [Source:HGNC Symbol;Acc:HGNC:9647]" | -                                                     | 4981 4419            | 5939                 |        |
| 3796                                | 3675 4673                                             | 14.52349135          | 10.38766022          |        |
| 14.66815724                         | 9.785594069                                           | 8.538384678          | 11.63058589          |        |
| ENSG00000231058                     | 0 0                                                   | 0 24.10987733        | 5.483159264          |        |
| 0                                   | 0 9.864345531                                         | -5.720963891         | 0.013111817          |        |
| 1                                   | MSANTD2P1                                             | 21 23101223          | 23103074             |        |
| +                                   | 1368                                                  | processed_pseudogene | Myb/SANT DNA binding |        |
| domain containing 2                 | pseudogene 1 [Source:HGNC Symbol;Acc:HGNC:39637]      |                      |                      |        |
| -                                   | 0 0                                                   | 0 24                 | 6 0 0                |        |
| 0                                   | 0 0.848254868                                         | 0.191127752          | 0                    |        |
| ENSG00000170027                     | 9875.824864                                           | 9515.153461          | 9355.575246          |        |

|                                      |                                                      |             |                |             |
|--------------------------------------|------------------------------------------------------|-------------|----------------|-------------|
| 12026.81047                          | 12576.53963                                          | 10663.85027 | 9582.184524    |             |
| 11755.73346                          | -0.294983599                                         | 0.013133462 | 0.074194841    | YWHAG       |
| 7                                    | 76326794                                             | 76359031    | - 3750         |             |
| protein_coding                       | tyrosine 3-monooxygenase/tryptophan 5-monooxygenase  |             |                |             |
| activation protein gamma             | [Source:HGNC Symbol;Acc:HGNC:12852]                  |             | -              |             |
| 8536                                 | 10265                                                | 9568        | 11972          | 13762       |
| 120.6873202                          |                                                      | 118.1931629 | 154.3606707    | 124.4852373 |
| 135.2895954                          |                                                      |             |                | 159.9222471 |
| ENSG00000217416                      | 21.98227184                                          | 14.83121825 | 14.66697624    |             |
| 1.004578222                          | 3.65543951                                           | 1.962431039 | 17.16015544    |             |
| 2.207482924                          | 2.946407932                                          | 0.013149637 | 1              | ISCA1P1 5   |
| 62776877                             | 62777263                                             | -           | 387            |             |
| processed_pseudogene                 | iron-sulfur cluster assembly 1 pseudogene 1          |             |                |             |
| [Source:HGNC Symbol;Acc:HGNC:33263]  |                                                      | -           | 19             | 16 15       |
| 1                                    | 4                                                    | 2           | 2.684957086    | 1.822816603 |
| 1.795489004                          | 0.124936764                                          | 0.450409585 | 0.241248747    |             |
| ENSG00000092607                      | 12.72657843                                          | 19.46597396 | 10.75578258    | 0           |
| 0                                    | 2.943646558                                          | 14.31611166 | 0.981215519    |             |
| 3.878087425                          | 0.013157526                                          | 1           | TBX15          | 1 118883046 |
| 118989556                            | -                                                    | 4349        | protein_coding | T-box 15    |
| [Source:HGNC Symbol;Acc:HGNC:11594]  |                                                      | T-box       | 11             | 21 11       |
| 0                                    | 0                                                    | 3           | 0.138324144    | 0.212894207 |
| 0.117167114                          | 0                                                    | 0           | 0.032201632    |             |
| ENSG00000100028                      | 2857.695339                                          | 2857.790367 | 2900.150102    |             |
| 2232.172809                          | 2422.642535                                          | 2299.969178 | 2871.878603    |             |
| 2318.261507                          | 0.308888677                                          | 0.01317156  | 0.074382577    | SNRPD3      |
| 22                                   | 24555503                                             | 24609980    | + 2544         |             |
| protein_coding                       | small nuclear ribonucleoprotein D3 polypeptide       |             |                |             |
| [Source:HGNC Symbol;Acc:HGNC:11160]  |                                                      | -           | 2470           | 3083 2966   |
| 2222                                 | 2651                                                 | 2344        | 53.09755935    | 53.43063993 |
| 54.00780109                          | 42.23068871                                          | 45.40997037 | 43.01169289    |             |
| ENSG00000087302                      | 2031.624703                                          | 1754.71851  | 1936.040864    |             |
| 1592.256482                          | 1485.022301                                          | 1412.950348 | 1907.461359    |             |
| 1496.743044                          | 0.349594637                                          | 0.013184236 | 0.074426666    | RTRAF       |
| 14                                   | 51989475                                             | 52010691    | + 8323         |             |
| protein_coding                       | "RNA transcription, translation and transport factor |             |                |             |
| [Source:HGNC Symbol;Acc:HGNC:23169]" |                                                      | -           | 1756           | 1893 1980   |
| 1585                                 | 1625                                                 | 1440        | 11.53823366    | 10.02777723 |
| 11.02015623                          | 9.207687862                                          | 8.508089865 | 8.076601091    |             |
| ENSG00000181577                      | 60.16200714                                          | 114.9419415 | 74.31267963    |             |
| 143.6546857                          | 230.2926891                                          | 117.7458623 | 83.13887608    |             |
| 163.8977457                          | -0.976572739                                         | 0.013208205 | 0.074534449    |             |
| C6orf223                             | 6                                                    | 44000580    | 44005958       | + 3917      |
| protein_coding                       | chromosome 6 open reading frame 223                  |             |                |             |
| [Source:HGNC Symbol;Acc:HGNC:28692]  |                                                      | -           | 52             | 124 76      |
| 143                                  | 252                                                  | 120         | 0.726013146    | 1.395732115 |
| 0.898798785                          | 1.765158395                                          | 2.803532319 | 1.430124051    |             |
| ENSG00000124160                      | 1558.427377                                          | 1343.152203 | 1248.648577    |             |
| 2002.124396                          | 1641.29234                                           | 1767.169151 | 1383.409386    |             |
| 1803.528629                          | -0.382942795                                         | 0.013263769 | 0.074816872    | NCOA5       |

|                                     |                                              |              |                      |                        |      |
|-------------------------------------|----------------------------------------------|--------------|----------------------|------------------------|------|
| 20                                  | 46060985                                     | 46089952     | -                    | 3220                   |      |
| protein_coding                      | nuclear receptor coactivator 5               | [Source:HGNC |                      |                        |      |
| Symbol;Acc:HGNC:15909]              | -                                            | 1347 1449    | 1277 1993            | 1796                   |      |
| 1801                                | 22.87738794                                  | 19.84021946  | 18.37119815          |                        |      |
| 29.92627369                         | 24.30575178                                  | 26.10981995  |                      |                        |      |
| ENSG00000149658                     | 2146.163908                                  | 2449.931865  | 2416.139886          |                        |      |
| 2968.528646                         | 2905.16055                                   | 2873.980257  | 2337.411887          |                        |      |
| 2915.889818                         | -0.318722196                                 | 0.013268041  | 0.074816872          | YTHDF1                 |      |
| 20                                  | 63195429                                     | 63216234     | -                    | 3301                   |      |
| protein_coding                      | YTH N6-methyladenosine RNA binding protein 1 | [Source:HGNC |                      |                        |      |
| Symbol;Acc:HGNC:15867]              | -                                            | 1855 2643    | 2471                 |                        |      |
| 2955                                | 3179 2929                                    | 30.73216119  | 35.30088528          |                        |      |
| 34.6760545                          | 43.28258368                                  | 41.9665822   | 41.42093358          |                        |      |
| ENSG00000214826                     | 273.0429555                                  | 404.1506974  | 503.5661843          |                        |      |
| 326.4879222                         | 206.5323323                                  | 173.6751469  | 393.5866124          |                        |      |
| 235.5651338                         | 0.742163462                                  | 0.013278511  | 0.074847029          | DDX12P                 |      |
| 12                                  | 9418673 9448229                              | -            | 2947                 | unprocessed_pseudogene |      |
| "DEAD/H-box helicase 12, pseudogene | [Source:HGNC                                 |              |                      |                        |      |
| Symbol;Acc:HGNC:2737]"              | -                                            | 236 436      | 515 325              | 226                    |      |
| 177                                 | 4.379520664                                  | 6.522893854  | 8.095236648          |                        |      |
| 5.33217558                          | 3.341849604                                  | 2.803749224  |                      |                        |      |
| ENSG00000188933                     | 204.7822166                                  | 176.1207168  | 211.2044579          |                        |      |
| 139.6363729                         | 106.0077458                                  | 107.9337071  | 197.3691304          |                        |      |
| 117.8592753                         | 0.744042447                                  | 0.013286637  | 0.074847029          |                        |      |
| USP32P1 17                          | 16786489                                     | 16804455     | +                    | 9299                   |      |
| transcribed_unprocessed_pseudogene  | ubiquitin specific peptidase                 |              |                      |                        |      |
| 32 pseudogene 1                     | [Source:HGNC                                 |              |                      |                        |      |
| Symbol;Acc:HGNC:43570]              | -                                            | 177          |                      |                        |      |
| 190                                 | 216 139                                      | 116 110      | 1.040954463          |                        |      |
| 0.90084757                          | 1.076019048                                  | 0.722736135  | 0.543601116          |                        |      |
| 0.552207719                         |                                              |              |                      |                        |      |
| ENSG00000245556                     | 69.41770054                                  | 110.3071858  | 102.6688337          |                        |      |
| 144.659264                          | 182.7719755                                  | 177.600009   | 94.13124             |                        |      |
| 168.3437495                         | -0.835659217                                 | 0.013288077  | 0.074847029          |                        |      |
| SCAMP1-AS1                          | 5                                            | 78342365     | 78360507             | -                      | 1792 |
| lincRNA                             | SCAMP1 antisense RNA 1                       | [Source:HGNC |                      |                        |      |
| Symbol;Acc:HGNC:50544]              | -                                            | 60 119       | 105 144              | 200                    |      |
| 181                                 | 1.831082693                                  | 2.927810163  | 2.714274393          |                        |      |
| 3.885310245                         | 4.863518678                                  | 4.715053288  |                      |                        |      |
| ENSG00000241157                     | 15.04050178                                  | 5.561706845  | 2.933395248          | 0                      |      |
| 0                                   | 0                                            | 7.845201293  | 0                    | 5.460443684            |      |
| 0.013307204                         | 1                                            | AC104763.1   | 17                   | 60245288               |      |
| 60245647                            | -                                            | 360          | processed_pseudogene | ribosomal              |      |
| protein L32 (RPL32)                 | pseudogene                                   | -            | 13                   | 6                      | 3 0  |
| 0                                   | 0                                            | 1.974856593  | 0.734822943          | 0.386030136            |      |
| 0                                   | 0                                            | 0            |                      |                        |      |
| ENSG00000166411                     | 858.4655634                                  | 775.8581049  | 817.4394759          |                        |      |
| 629.8705452                         | 562.9376845                                  | 642.6961653  | 817.2543814          |                        |      |
| 611.8347983                         | 0.417539192                                  | 0.013312017  | 0.074933961          | IDH3A                  |      |
| 15                                  | 78131498                                     | 78171949     | +                    | 6832                   |      |
| protein_coding                      | isocitrate dehydrogenase 3 (NAD(+)) alpha    | [Source:HGNC |                      |                        |      |



|                                                       |                                                                                                       |                                        |             |             |                |             |  |
|-------------------------------------------------------|-------------------------------------------------------------------------------------------------------|----------------------------------------|-------------|-------------|----------------|-------------|--|
| Symbol;Acc:HGNC:5384]                                 | -                                                                                                     | 742                                    | 837         | 836         | 627            | 616         |  |
| 655                                                   | 5.939511949                                                                                           | 5.4014649                              |             | 5.668405041 |                |             |  |
| 4.437321537                                           | 3.929085253                                                                                           | 4.475478531                            |             |             |                |             |  |
| ENSG00000229848                                       | 2.313923351                                                                                           | 18.53902282                            |             | 12.71137941 |                |             |  |
| 27.12361199                                           | 53.91773277                                                                                           | 49.06077597                            |             | 11.18810853 |                |             |  |
| 43.36737358                                           | -1.93989382                                                                                           | 0.013315731                            |             | 0.074933961 |                |             |  |
| AC139149.1                                            | 17                                                                                                    | 81514047                               | 81527776    | +           |                | 957         |  |
| antisense                                             |                                                                                                       | "novel transcript, antisense to ACTG1" |             |             | -              |             |  |
| 2                                                     | 20                                                                                                    | 13                                     | 27          | 59          | 50             | 0.114291194 |  |
| 0.921408079                                           |                                                                                                       | 0.629265425                            |             | 1.364121465 |                | 2.68657316  |  |
| 2.438956769                                           |                                                                                                       |                                        |             |             |                |             |  |
| ENSG00000110719                                       | 693.0200438                                                                                           | 1241.187578                            |             | 1374.784573 |                |             |  |
| 678.0902999                                           | 497.1397733                                                                                           | 944.9105452                            |             | 1102.997398 |                |             |  |
| 706.7135395                                           | 0.643152205                                                                                           | 0.01331993                             |             | 0.074933961 |                | TCIRG1      |  |
| 11                                                    | 68039016                                                                                              | 68050895                               |             | +           | 4384           |             |  |
| protein_coding                                        | "T cell immune regulator 1, ATPase H+ transporting V0 subunit a3 [Source:HGNC Symbol;Acc:HGNC:11647]" |                                        |             |             |                | -           |  |
| 1406                                                  | 675                                                                                                   | 544                                    | 963         | 7.472243048 |                | 1339        |  |
| 14.85652476                                           |                                                                                                       | 7.444481309                            |             | 5.407380767 |                | 10.25419985 |  |
| ENSG0000040633                                        | 1372.156547                                                                                           | 1394.134516                            |             | 1751.236963 |                |             |  |
| 1914.726091                                           | 1901.742405                                                                                           | 2035.040987                            |             | 1505.842676 |                |             |  |
| 1950.503161                                           | -0.373022601                                                                                          | 0.013327869                            |             | 0.074933961 |                | PHF23       |  |
| 17                                                    | 7235028                                                                                               | 7239722                                | -           | 2783        | protein_coding | PHD         |  |
| finger protein 23 [Source:HGNC Symbol;Acc:HGNC:28428] |                                                                                                       |                                        |             | -           |                | 1186        |  |
| 1504                                                  | 1791                                                                                                  | 1906                                   | 2081        | 2074        | 23.305917      |             |  |
| 23.82695737                                           | 29.8115691                                                                                            |                                        | 33.11394373 |             | 32.58498096    |             |  |
| 34.78897087                                           |                                                                                                       |                                        |             |             |                |             |  |
| ENSG00000265972                                       | 2788.277638                                                                                           | 3882.071378                            |             | 1770.792932 |                |             |  |
| 4885.263894                                           | 6049.752388                                                                                           | 4307.53613                             |             | 2813.713983 |                |             |  |
| 5080.850804                                           | -0.852568427                                                                                          | 0.01332802                             |             | 0.074933961 |                | TXNIP       |  |
| 1                                                     | 145992435                                                                                             | 145996600                              |             | -           | 3625           |             |  |
| protein_coding                                        | thioredoxin interacting protein [Source:HGNC Symbol;Acc:HGNC:16952]                                   |                                        |             |             |                | -           |  |
| 4390                                                  | 36.3583147                                                                                            | 50.93691286                            |             | 23.14263976 |                | 6620        |  |
| 64.86306626                                           | 79.58085051                                                                                           | 56.53306674                            |             |             |                |             |  |
| ENSG00000106479                                       | 165.4455196                                                                                           | 188.1710816                            |             | 185.7816991 |                |             |  |
| 332.5153915                                           | 211.1016317                                                                                           | 320.8574749                            |             | 179.7994334 |                |             |  |
| 288.158166                                            | -0.67899306                                                                                           | 0.013338222                            |             | 0.07496375  |                | ZNF862      |  |
| 7                                                     | 149838367                                                                                             | 149867479                              |             | +           | 8430           |             |  |
| protein_coding                                        | zinc finger protein 862 [Source:HGNC Symbol;Acc:HGNC:34519]                                           |                                        |             |             |                | -           |  |
| 327                                                   | 0.927690642                                                                                           | 1.061701476                            |             | 1.044067272 |                | 231         |  |
| 1.898460807                                           | 1.194106337                                                                                           | 1.810782188                            |             |             |                |             |  |
| ENSG0000022840                                        | 2030.467741                                                                                           | 2661.276725                            |             | 2383.872539 |                |             |  |
| 3097.114658                                           | 3081.535507                                                                                           | 2862.20567                             |             | 2358.539002 |                |             |  |
| 3013.618612                                           | -0.353178857                                                                                          | 0.013360353                            |             | 0.075060534 |                | RNF10       |  |
| 12                                                    | 120533480                                                                                             | 120577594                              |             | +           | 5911           |             |  |
| protein_coding                                        | ring finger protein 10 [Source:HGNC Symbol;Acc:HGNC:10055]                                            |                                        |             |             |                | -           |  |
| 2917                                                  | 16.23719006                                                                                           | 21.41441383                            |             | 19.10623863 |                | 3372        |  |

|                               |                                                 |             |                |                |  |  |  |
|-------------------------------|-------------------------------------------------|-------------|----------------|----------------|--|--|--|
| 25.21818242                   | 24.85908872                                     | 23.03676572 |                |                |  |  |  |
| ENSG0000049249                | 136.5214777                                     | 41.71280134 | 161.3367387    |                |  |  |  |
| 61.27927154                   | 47.52071363                                     | 27.47403455 | 113.1903392    |                |  |  |  |
| 45.42467324                   | 1.315967621                                     | 0.013386721 | 0.075181046    |                |  |  |  |
| TNFRSF9 1                     | 7915894 7943165                                 | - 6331      | protein_coding | TNF            |  |  |  |
| receptor superfamily member 9 | [Source:HGNC Symbol;Acc:HGNC:11924]             |             |                |                |  |  |  |
| -                             | 118 45                                          | 165 61      | 52 28          |                |  |  |  |
| 1.019305591                   | 0.31338208                                      | 1.207296903 | 0.465863557    |                |  |  |  |
| 0.357923017                   | 0.206458018                                     |             |                |                |  |  |  |
| ENSG00000173546               | 885.0756819                                     | 641.4501895 | 1605.544999    |                |  |  |  |
| 664.0262048                   | 633.304895                                      | 704.512743  | 1044.023624    |                |  |  |  |
| 667.2812809                   | 0.645906689                                     | 0.013407166 | 0.075268216    | CSPG4          |  |  |  |
| 15                            | 75674322                                        | 75712848    | - 8290         |                |  |  |  |
| protein_coding                | chondroitin sulfate proteoglycan 4 [Source:HGNC |             |                |                |  |  |  |
| Symbol;Acc:HGNC:2466]         | -                                               | 765 692     | 1642 661       | 693            |  |  |  |
| 718                           | 5.04663177                                      | 3.680319492 | 9.175317007    |                |  |  |  |
| 3.855210938                   | 3.642816557                                     | 4.043113652 |                |                |  |  |  |
| ENSG00000278902               | 13.88354011                                     | 28.73548537 | 10.75578258    |                |  |  |  |
| 80.36625776                   | 47.52071363                                     | 36.30497422 | 17.79160268    |                |  |  |  |
| 54.73064854                   | -1.614738023                                    | 0.013415768 | 0.075277666    |                |  |  |  |
| AC010947.1                    | 18 73921939                                     | 73922631    | -              | 693            |  |  |  |
| TEC                           | TEC -                                           | 12 31       | 11 80          | 52             |  |  |  |
| 37                            | 0.946984181                                     | 1.972252055 | 0.735295497    |                |  |  |  |
| 5.581590475                   | 3.269856598                                     | 2.492381536 |                |                |  |  |  |
| ENSG00000164342               | 39.33669697                                     | 52.83621503 | 32.26734773    | 0              |  |  |  |
| 17.36333767                   | 8.830939675                                     | 41.48008658 | 8.731425782    |                |  |  |  |
| 2.24085344                    | 0.013418698                                     | 0.075277666 | TLR3 4         |                |  |  |  |
| 186069152                     | 186088069                                       | +           | 6724           | protein_coding |  |  |  |
| toll like receptor 3          | [Source:HGNC Symbol;Acc:HGNC:11849]             |             |                |                |  |  |  |
| -                             | 34 57                                           | 33 0        | 19 9           |                |  |  |  |
| 0.276532338                   | 0.37374992                                      | 0.227346719 | 0              | 0.123135845    |  |  |  |
| 0.062482851                   |                                                 |             |                |                |  |  |  |
| ENSG00000213999               | 0 1.853902282                                   | 8.800185745 | 40.18312888    |                |  |  |  |
| 22.84649694                   | 12.75580175                                     | 3.551362676 | 25.26180919    |                |  |  |  |
| -2.81120179                   | 0.013426113                                     | 0.075285775 | MEF2B 19       |                |  |  |  |
| 19145568                      | 19170289                                        | - 1848      | protein_coding |                |  |  |  |
| myocyte enhancer factor 2B    | [Source:HGNC Symbol;Acc:HGNC:6995]              |             |                |                |  |  |  |
| SRF                           | 0 2 9                                           | 40 25       | 13 0           |                |  |  |  |
| 0.047715776                   | 0.225602027                                     | 1.046548214 | 0.589517416    |                |  |  |  |
| 0.328388108                   |                                                 |             |                |                |  |  |  |
| ENSG00000105556               | 684.921312                                      | 760.0999355 | 710.8594485    |                |  |  |  |
| 1020.651474                   | 954.069712                                      | 876.2254589 | 718.6268987    |                |  |  |  |
| 950.3155482                   | -0.402733407                                    | 0.013429993 | 0.075285775    | MIER2          |  |  |  |
| 19                            | 301444 344815                                   | - 7939      | protein_coding | MIER           |  |  |  |
| family member 2               | [Source:HGNC Symbol;Acc:HGNC:29210]             |             |                |                |  |  |  |
| 820                           | 727 1016                                        | 1044 893    | 4.078031889    | 592            |  |  |  |
| 4.553884468                   | 4.242003912                                     | 6.18769819  | 5.73051026     |                |  |  |  |
| 5.250875157                   |                                                 |             |                |                |  |  |  |
| ENSG00000205730               | 1598.921036                                     | 1655.534738 | 1823.594046    |                |  |  |  |
| 2366.786291                   | 1867.929589                                     | 2328.424428 | 1692.683273    |                |  |  |  |

|                        |                                                        |             |                              |              |             |
|------------------------|--------------------------------------------------------|-------------|------------------------------|--------------|-------------|
| 2187.713436            | -0.369797054                                           | 0.013449138 | 0.075365457                  |              |             |
| ITPRIPL2               | 16                                                     | 19113932    | 19121629                     | +            | 7440        |
| protein_coding         | ITPRIP like 2 [Source:HGNC                             |             |                              |              |             |
| Symbol;Acc:HGNC:27257] | -                                                      | 1382        | 1786                         | 1865         | 2356        |
| 2373                   | 10.1585055                                             | 10.58382078 | 11.61203554                  |              | 2044        |
| 15.31100037            | 11.97199574                                            | 14.889182   |                              |              |             |
| ENSG00000183826        | 607.4048798                                            | 768.4424958 | 876.1073809                  |              |             |
| 985.4912358            | 944.9311132                                            | 1171.57133  | 750.6515855                  |              |             |
| 1033.997893            | -0.46103937                                            | 0.013512976 | 0.075695441                  |              | BTBD9       |
| 6                      | 38168451                                               | 38640148    | -                            | 9537         |             |
| protein_coding         | BTB domain containing 9 [Source:HGNC                   |             |                              |              |             |
| Symbol;Acc:HGNC:21228] | -                                                      | 525         | 829                          | 896          | 981         |
| 1194                   | 3.010524969                                            | 3.832451839 | 4.352098167                  |              | 1034        |
| 4.973457845            | 4.724625111                                            | 5.844381805 |                              |              |             |
| ENSG00000101911        | 1101.427515                                            | 1167.031486 | 957.2646494                  |              |             |
| 871.9738967            | 830.6986286                                            | 720.2121913 | 1075.241217                  |              |             |
| 807.6282389            | 0.412895319                                            | 0.013550596 | 0.075878377                  |              | PRPS2       |
| X                      | 12791355                                               | 12824222    | +                            | 2758         |             |
| protein_coding         | phosphoribosyl pyrophosphate synthetase 2 [Source:HGNC |             |                              |              |             |
| Symbol;Acc:HGNC:9465]  | -                                                      | 952         | 1259                         | 979          | 868         |
| 734                    | 18.87719227                                            | 20.12636879 | 16.44337214                  |              | 909         |
| 15.21691728            | 14.36243973                                            | 12.42361069 |                              |              |             |
| ENSG00000204709        | 0                                                      | 0           | 0.977798416                  | 26.11903377  |             |
| 10.96631853            | 0                                                      | 0.325932805 | 12.3617841                   | -5.085226334 |             |
| 0.013559329            | 1                                                      | LINC01556   | 6                            | 28943877     |             |
| 28944537               | +                                                      | 466         | lincRNA long intergenic non- |              |             |
| protein_coding         | RNA 1556 [Source:HGNC Symbol;Acc:HGNC:21195]           |             |                              |              |             |
| 0                      | 0                                                      | 1           | 26                           | 12           | 0           |
| 0.099406902            | 2.697668916                                            | 1.122157786 | 0                            |              | 0           |
| ENSG00000144559        | 467.412517                                             | 449.5713033 | 445.8760778                  |              |             |
| 815.7175163            | 560.1961049                                            | 569.1050013 | 454.2866327                  |              |             |
| 648.3395408            | -0.512971017                                           | 0.013563066 | 0.075881518                  |              | TAMM41      |
| 3                      | 11790442                                               | 11846919    | -                            | 5925         |             |
| protein_coding         | TAM41 mitochondrial translocator assembly and          |             |                              |              |             |
| maintenance homolog    | [Source:HGNC Symbol;Acc:HGNC:25187]                    |             |                              |              |             |
| 485                    | 456                                                    | 812         | 613                          | 580          | 3.728959986 |
| 3.609003821            | 3.565159331                                            | 6.626266384 | 4.508485919                  |              |             |
| 4.569678799            |                                                        |             |                              |              |             |
| ENSG00000137522        | 653.6833468                                            | 970.5178445 | 812.5504838                  |              |             |
| 1030.697256            | 1105.770452                                            | 1196.101718 | 812.2505584                  |              |             |
| 1110.856475            | -0.450606593                                           | 0.01356449  | 0.075881518                  |              | RNF121      |
| 11                     | 71928701                                               | 71997597    | +                            | 3567         |             |
| protein_coding         | ring finger protein 121 [Source:HGNC                   |             |                              |              |             |
| Symbol;Acc:HGNC:21070] | -                                                      | 565         | 1047                         | 831          | 1026        |
| 1219                   | 8.662436244                                            | 12.94128884 | 10.79196108                  |              | 1210        |
| 13.9073847             | 14.78226075                                            | 15.95315674 |                              |              |             |
| ENSG00000163466        | 5715.390678                                            | 5011.097867 | 5119.752507                  |              |             |
| 3940.960365            | 4770.34856                                             | 3855.195776 | 5282.080351                  |              |             |
| 4188.8349              | 0.334344747                                            | 0.013568336 | 0.075881518                  |              | ARPC2       |
| 2                      | 218217094                                              | 218254356   | +                            | 6562         |             |

|                 |                                                               |             |         |             |             |             |                      |
|-----------------|---------------------------------------------------------------|-------------|---------|-------------|-------------|-------------|----------------------|
| protein_coding  | actin related protein 2/3 complex subunit 2                   |             |         |             |             |             |                      |
|                 | [Source:HGNC Symbol;Acc:HGNC:705]                             |             |         |             | -           | 4940        | 5406                 |
|                 | 3923                                                          | 5220        | 3929    | 41.1704331  | 36.32233615 |             | 5236                 |
| 36.96288556     |                                                               | 28.90568719 |         | 34.66513331 | 27.95064528 |             |                      |
| ENSG00000100601 | 414.1922799                                                   |             |         | 352.2414335 | 283.5615407 |             |                      |
| 498.2707981     | 551.0575061                                                   |             |         | 471.9646649 | 349.998418  |             |                      |
| 507.0976564     | -0.53637816                                                   |             |         | 0.013571013 | 0.075881518 |             | ALKBH1               |
|                 | 14                                                            | 77672404    |         | 77708020    | -           | 2844        |                      |
| protein_coding  | "alkB homolog 1, histone H2A dioxygenase [Source:HGNC         |             |         |             |             |             |                      |
|                 | Symbol;Acc:HGNC:17911]"                                       |             |         |             | -           | 358         | 380                  |
|                 | 481                                                           | 6.884115486 |         | 5.890985619 | 4.723575503 |             | 603                  |
| 8.4324408       | 9.239454217                                                   |             |         | 7.895170626 |             |             |                      |
| ENSG00000230910 | 12.72657843                                                   |             |         | 14.83121825 | 20.53376674 |             | 0                    |
|                 | 0                                                             | 3.924862078 |         | 16.03052114 | 1.308287359 |             |                      |
| 3.624777966     | 0.013632577                                                   |             |         | 1           | AL391807.1  | 6           |                      |
| 68628117        | 68635161                                                      |             |         | -           | 5924        |             | processed_transcript |
|                 | uncharacterized LOC101928307 [Source:NCBI gene;Acc:101928307] |             |         |             |             |             |                      |
|                 | -                                                             | 11          | 16      | 21          | 0           | 0           | 4                    |
| 0.101548228     | 0.119080018                                                   |             |         | 0.164212684 | 0           | 0           |                      |
| 0.031520346     |                                                               |             |         |             |             |             |                      |
| ENSG00000189043 | 3114.540831                                                   |             |         | 3249.8907   | 2912.861482 |             |                      |
| 2056.37162      | 2824.740881                                                   |             |         | 2297.025531 | 3092.431004 |             |                      |
| 2392.712678     | 0.369915653                                                   |             |         | 0.013644575 | 0.076263229 |             | NDUFA4               |
|                 | 7                                                             | 10931951    |         | 10940256    | -           | 3556        |                      |
| protein_coding  | "NDUFA4, mitochondrial complex associated [Source:HGNC        |             |         |             |             |             |                      |
|                 | Symbol;Acc:HGNC:7687]"                                        |             |         |             | -           | 2692        | 3506                 |
|                 | 2341                                                          | 41.40073163 |         | 43.46944721 | 38.80710152 |             | 3091                 |
| 27.83282615     | 37.87876846                                                   |             |         | 30.73163718 |             |             |                      |
| ENSG00000198604 | 1752.796939                                                   |             |         | 1924.350568 | 1866.617176 |             |                      |
| 1356.1806       | 1656.827958                                                   |             |         | 1235.350339 | 1847.921561 |             |                      |
| 1416.119632     | 0.38388813                                                    |             |         | 0.013649257 | 0.076263229 |             | BAZ1A                |
|                 | 14                                                            | 34752731    |         | 34875647    | -           | 7698        |                      |
| protein_coding  | bromodomain adjacent to zinc finger domain 1A                 |             |         |             |             |             |                      |
|                 | [Source:HGNC Symbol;Acc:HGNC:960]                             |             |         |             | -           | 1515        | 2076                 |
|                 | 1350                                                          | 1813        | 1259    | 10.76290331 | 11.89004232 |             | 1909                 |
| 11.48763101     | 8.479242935                                                   |             |         | 10.26309845 | 7.634733098 |             |                      |
| ENSG00000127564 | 424.604935                                                    |             |         | 845.3794405 | 1019.843748 |             |                      |
| 339.547439      | 523.6417098                                                   |             |         | 550.4619064 | 763.2760412 |             |                      |
| 471.2170184     | 0.69649996                                                    |             |         | 0.01366078  | 0.076299723 |             | PKMYT1               |
|                 | 16                                                            | 2968024     | 2980539 | -           | 5034        |             |                      |
| protein_coding  | "protein kinase, membrane associated tyrosine/                |             |         |             |             |             |                      |
|                 | threonine 1 [Source:HGNC Symbol;Acc:HGNC:29650]"              |             |         |             | -           |             | 367                  |
|                 | 912                                                           | 1043        | 338     | 573         | 561         | 3.987012211 |                      |
| 7.987586698     | 9.597841044                                                   |             |         | 3.246420002 | 4.960209371 |             |                      |
| 5.202303509     |                                                               |             |         |             |             |             |                      |
| ENSG00000197562 | 575.0099528                                                   |             |         | 641.4501895 | 863.3960015 |             |                      |
| 931.2440118     | 976.916209                                                    |             |         | 964.5348556 | 693.2853813 |             |                      |
| 957.5650255     | -0.465249282                                                  |             |         | 0.013669747 | 0.07632192  |             | RAB40C               |
|                 | 16                                                            | 589357      | 629272  | +           | 4180        |             |                      |
| protein_coding  | "RAB40C, member RAS oncogene family [Source:HGNC              |             |         |             |             |             |                      |

|                                                                       |              |                |             |      |        |
|-----------------------------------------------------------------------|--------------|----------------|-------------|------|--------|
| Symbol;Acc:HGNC:18285]" -                                             | 497          | 692            | 883         | 927  | 1069   |
| 983 6.502417035                                                       | 7.29900684   |                | 9.785586891 |      |        |
| 10.72271268                                                           | 11.14448544  | 10.97800115    |             |      |        |
| ENSG00000104356                                                       | 779.7921694  | 946.4171148    | 971.9316257 |      |        |
| 643.9346403                                                           | 663.462271   | 706.475174     | 899.3803033 |      |        |
| 671.2906951                                                           | 0.422658413  | 0.013690316    | 0.07640886  |      | POP1   |
| 8 98117297                                                            |              | 98159834       | + 4852      |      |        |
| protein_coding "POP1 homolog, ribonuclease P/MRP subunit [Source:HGNC |              |                |             |      |        |
| Symbol;Acc:HGNC:30129]" -                                             | 674          | 1021           | 994         | 641  | 726    |
| 720 7.596854649                                                       | 9.277669721  |                | 9.49004011  |      |        |
| 6.387610907                                                           | 6.520402815  | 6.927200214    |             |      |        |
| ENSG00000115211                                                       | 842.2680999  | 751.7573752    | 657.0805357 |      |        |
| 1048.779664                                                           | 954.069712   | 994.9525367    | 750.3686703 |      |        |
| 999.2673042                                                           | -0.41384941  | 0.01370846     | 0.076475078 |      | EIF2B4 |
| 2 27364352                                                            |              | 27370486       | - 5341      |      |        |
| protein_coding eukaryotic translation initiation factor 2B subunit    |              |                |             |      |        |
| delta [Source:HGNC Symbol;Acc:HGNC:3260]                              |              |                | - 728       | 811  |        |
| 672 1044 1044 1014                                                    | 7.454242449  | 6.69471717     |             |      |        |
| 5.828397334 9.451029901                                               | 8.517978086  | 8.862605394    |             |      |        |
| ENSG00000133243                                                       | 2634.401736  | 3270.283625    | 3348.959575 |      |        |
| 3947.992413                                                           | 3682.855306  | 4111.293027    | 3084.548312 |      |        |
| 3914.046915                                                           | -0.343240841 | 0.013713881    | 0.076475078 |      | BTBD2  |
| 19 1985438 2034881                                                    | - 5944       | protein_coding |             |      | BTB    |
| domain containing 2 [Source:HGNC Symbol;Acc:HGNC:15504]               |              |                | -           |      | 2277   |
| 3528 3425 3930 4030 4190                                              | 20.94975472  |                |             |      |        |
| 26.16879552                                                           | 26.69219143  | 31.96796316    | 29.54505774 |      |        |
| 32.90646709                                                           |              |                |             |      |        |
| ENSG00000175806                                                       | 585.4226079  | 641.4501895    | 840.9066379 |      |        |
| 446.0327306                                                           | 482.5180153  | 534.7624581    | 689.2598118 |      |        |
| 487.771068                                                            | 0.499355895  | 0.013717189    | 0.076475078 |      | MSRA   |
| 8 10054268                                                            |              | 10428891       | + 4162      |      |        |
| protein_coding methionine sulfoxide reductase A [Source:HGNC          |              |                |             |      |        |
| Symbol;Acc:HGNC:7377]" -                                              | 506          | 692            | 860         | 444  | 528    |
| 545 6.64879823                                                        | 7.330573905  | 9.571914952    |             |      |        |
| 5.15800918                                                            | 5.528285258  | 6.112803879    |             |      |        |
| ENSG00000198796                                                       | 263.7872621  | 184.463277     | 196.5374816 |      |        |
| 124.5676995                                                           | 60.31475191  | 158.9569142    | 214.9293402 |      |        |
| 114.6131219                                                           | 0.907409326  | 0.013723207    | 0.076480741 |      | ALPK2  |
| 18 58481247                                                           |              | 58628957       | - 9431      |      |        |
| protein_coding alpha kinase 2 [Source:HGNC Symbol;Acc:HGNC:20565]     |              |                |             |      |        |
| - 228 199 201 124                                                     | 66           | 162            |             |      |        |
| 1.322122861                                                           | 0.930313428  | 0.987280975    | 0.635718949 |      |        |
| 0.304961341                                                           | 0.801868781  |                |             |      |        |
| ENSG00000113648                                                       | 3459.31541   | 3503.875312    | 3752.790321 |      |        |
| 3073.004781                                                           | 2707.766817  | 2857.299593    | 3571.993681 |      |        |
| 2879.357064                                                           | 0.31111859   | 0.013728815    | 0.076484108 |      | H2AFY  |
| 5 135333900                                                           |              | 135399914      | - 17730     |      |        |
| protein_coding H2A histone family member Y [Source:HGNC               |              |                |             |      |        |
| Symbol;Acc:HGNC:4740]" -                                              | 2990         | 3780           | 3838        | 3059 | 2963   |
| 2912 9.222680538                                                      | 9.399765565  | 10.027639      |             |      |        |

|                        |                                               |                        |                        |             |  |
|------------------------|-----------------------------------------------|------------------------|------------------------|-------------|--|
| 8.342034044            | 7.282517109                                   | 7.667056627            |                        |             |  |
| ENSG00000183955        | 778.6352078                                   | 926.0241897            | 1101.978815            |             |  |
| 611.7881372            | 768.5561569                                   | 652.5083204            | 935.5460708            |             |  |
| 677.6175382            | 0.46561815                                    | 0.013736307            | 0.076497969            | KMT5A       |  |
| 12                     | 123383773                                     | 123409358              | + 4579                 |             |  |
| protein_coding         | lysine methyltransferase 5A                   | [Source:HGNC           |                        |             |  |
| Symbol;Acc:HGNC:29489] | -                                             | 673 999                | 1127 609               | 841         |  |
| 665                    | 8.037835863                                   | 9.618975148            | 11.40133557            |             |  |
| 6.430546242            | 8.003573729                                   | 6.779490205            |                        |             |  |
| ENSG00000122390        | 590.0504546                                   | 813.8631017            | 787.127725             |             |  |
| 1068.871228            | 933.9647947                                   | 980.2343039            | 730.3470938            |             |  |
| 994.3567756            | -0.443942754                                  | 0.013742758            | 0.076506022            | NAA60       |  |
| 16                     | 3443611 3486963                               | + 7397                 |                        |             |  |
| protein_coding         | "N(alpha)-acetyltransferase 60,               | NatF catalytic subunit |                        |             |  |
| [Source:HGNC           | Symbol;Acc:HGNC:25875]"                       | -                      | 510 878                | 805         |  |
| 1064                   | 1022 999                                      | 3.770589642            | 5.233266545            |             |  |
| 5.041302032            | 6.954841321                                   | 6.020795479            | 6.304576304            |             |  |
| ENSG00000178297        | 46.27846703                                   | 62.10572644            | 87.02405904            |             |  |
| 229.0438346            | 96.86914701                                   | 96.15912091            | 65.13608417            |             |  |
| 140.6907008            | -1.107732583                                  | 0.013759112            | 0.076569184            |             |  |
| TMPRSS9 19             | 2360238 2426239                               | + 4328                 | protein_coding         |             |  |
| transmembrane          | serine protease 9                             | [Source:HGNC           | Symbol;Acc:HGNC:30079] |             |  |
| -                      | 40 67                                         | 89 228                 | 106 98                 |             |  |
| 0.50543749             | 0.682529628                                   | 0.952588228            | 2.547116513            |             |  |
| 1.067277149            | 1.057024027                                   |                        |                        |             |  |
| ENSG00000279968        | 21.98227184                                   | 12.05036483            | 19.55596832            | 0           |  |
| 0.913859877            | 4.906077597                                   | 17.86286833            | 1.939979158            |             |  |
| 3.203558006            | 0.01376074                                    | 1                      | GVQW2 6                |             |  |
| 138725211              | 138773652                                     | - 2993                 | protein_coding         | GVQW        |  |
| motif containing 2     | [Source:HGNC                                  | Symbol;Acc:HGNC:51715] | -                      | 19          |  |
| 13                     | 20 0                                          | 1 5                    | 0.347169526            |             |  |
| 0.1915008              | 0.309546384                                   | 0                      | 0.014559682            | 0.077984685 |  |
| ENSG00000096433        | 2758.196635                                   | 2748.410133            | 3020.419308            |             |  |
| 2304.502441            | 1476.797562                                   | 2480.512833            | 2842.342025            |             |  |
| 2087.270945            | 0.445703703                                   | 0.013795411            | 0.076743251            | ITPR3       |  |
| 6                      | 33620365                                      | 33696574               | + 9870                 |             |  |
| protein_coding         | "inositol 1,4,5-trisphosphate receptor type 3 |                        |                        |             |  |
| [Source:HGNC           | Symbol;Acc:HGNC:6182]"                        | -                      | 2384 2965              | 3089        |  |
| 2294                   | 1616 2528                                     | 13.20942189            | 13.24468101            |             |  |
| 14.49783696            | 11.23770112                                   | 7.134816393            | 11.95655188            |             |  |
| ENSG00000119950        | 853.8377167                                   | 864.8454144            | 463.4764493            |             |  |
| 964.3950931            | 1156.032745                                   | 1075.412209            | 727.3865268            |             |  |
| 1065.280016            | -0.550928071                                  | 0.013819032            | 0.076846687            | MXI1        |  |
| 10                     | 110207605                                     | 110287365              | + 4607                 |             |  |
| protein_coding         | "MAX interactor 1, dimerization               | protein [Source:HGNC   |                        |             |  |
| Symbol;Acc:HGNC:7534]" | bHLH                                          | 738 933                | 474 960                | 1265        |  |
| 1096                   | 8.760580049                                   | 8.928888289            | 4.766093799            |             |  |
| 10.07521302            | 11.96550165                                   | 11.10550668            |                        |             |  |
| ENSG00000240184        | 1519.09068                                    | 1120.683929            | 1868.572773            |             |  |
| 1076.907854            | 1079.268515                                   | 1120.548123            | 1502.782461            |             |  |

|                                                             |                                                        |             |                |        |
|-------------------------------------------------------------|--------------------------------------------------------|-------------|----------------|--------|
| 1092.241497                                                 | 0.46016208                                             | 0.01384545  | 0.0769656      |        |
| PCDHGC3 5                                                   | 141475947                                              | 141512979   | + 5432         |        |
| protein_coding                                              | "protocadherin gamma subfamily C, 3 [Source:HGNC       |             |                |        |
| Symbol;Acc:HGNC:8716]"                                      | -                                                      | 1313 1209   | 1911 1072      | 1181   |
| 1142                                                        | 13.21903272                                            | 9.812970597 | 16.29683924    |        |
| 9.541930315                                                 | 9.474334942                                            | 9.814142927 |                |        |
| ENSG00000053254                                             | 624.7593049                                            | 671.112626  | 672.7253103    |        |
| 910.1478692                                                 | 867.2530237                                            | 823.2398208 | 656.1990804    |        |
| 866.8802379                                                 | -0.401299894                                           | 0.013859881 | 0.077002702    | FOXN3  |
| 14                                                          | 89124871                                               | 89619149    | - 11033        |        |
| protein_coding                                              | forkhead box N3 [Source:HGNC Symbol;Acc:HGNC:1928]     |             |                |        |
| Fork                                                        | 540 724                                                | 688 906     | 949 839        |        |
| 2.676670142                                                 | 2.893202995                                            | 2.888665642 | 3.970414022    |        |
| 3.748272805                                                 | 3.549885771                                            |             |                |        |
| ENSG00000135506                                             | 1147.705982                                            | 1119.756978 | 1554.699482    |        |
| 818.7312509                                                 | 719.2077235                                            | 1151.94702  | 1274.054147    |        |
| 896.6286648                                                 | 0.507184279                                            | 0.013862199 | 0.077002702    | OS9    |
| 12                                                          | 57693955                                               | 57721557    | + 5169         |        |
| protein_coding                                              | "OS9, endoplasmic reticulum lectin [Source:HGNC        |             |                |        |
| Symbol;Acc:HGNC:16994]"                                     | -                                                      | 992 1208    | 1590 815       | 787    |
| 1174                                                        | 10.49542073                                            | 10.3037274  | 14.24928418    |        |
| 7.623462934                                                 | 6.634784142                                            | 10.60248339 |                |        |
| ENSG00000234841                                             | 2.313923351                                            | 1.853902282 | 0.977798416    |        |
| 19.08698622                                                 | 9.138598774                                            | 17.66187935 | 1.715208016    |        |
| 15.29582145                                                 | -3.16639379                                            | 0.013868883 | 1 AC017007.2   |        |
| 4                                                           | 112826307                                              | 112827607   | + 1301         |        |
| processed_pseudogene                                        | "TAF4b RNA polymerase II, TATA box binding             |             |                |        |
| protein (TBP)-associated factor, 105kDa (TAF4B) pseudogene" | -                                                      |             |                |        |
| 2                                                           | 2 1                                                    | 19 10       | 18 0.084071232 |        |
| 0.067777673                                                 | 0.035606162                                            | 0.706118388 | 0.334951017    |        |
| 0.645864247                                                 |                                                        |             |                |        |
| ENSG00000082153                                             | 7958.739367                                            | 6361.66568  | 6488.67029     |        |
| 5011.84075                                                  | 5899.879369                                            | 5571.34172  | 6936.358446    |        |
| 5494.353946                                                 | 0.336024739                                            | 0.013869712 | 0.077016448    | BZW1   |
| 2                                                           | 200810594                                              | 200827338   | + 8085         |        |
| protein_coding                                              | basic leucine zipper and W2 domains 1 [Source:HGNC     |             |                |        |
| Symbol;Acc:HGNC:18380]"                                     | -                                                      | 6879 6863   | 6636 4989      | 6456   |
| 5678                                                        | 46.53074413                                            | 37.4255277  | 38.0214617     |        |
| 29.83559452                                                 | 34.7970234                                             | 32.78395914 |                |        |
| ENSG00000205097                                             | 276.5138405                                            | 379.1230166 | 248.3607977    |        |
| 344.5703302                                                 | 562.0238246                                            | 493.5514063 | 301.3325516    |        |
| 466.715187                                                  | -0.630697771                                           | 0.013888555 | 0.077093077    | FRG2   |
| 4                                                           | 190024351                                              | 190027257   | - 2103         |        |
| protein_coding                                              | FSHD region gene 2 [Source:HGNC Symbol;Acc:HGNC:19136] |             |                |        |
| -                                                           | 239 409                                                | 254 343     | 615 503        |        |
| 6.215174706                                                 | 8.574681417                                            | 5.594958889 | 7.885987128    |        |
| 12.74366777                                                 | 11.16541188                                            |             |                |        |
| ENSG00000085644                                             | 396.8378548                                            | 468.1103261 | 483.0324176    |        |
| 625.8522323                                                 | 666.2038506                                            | 572.0486479 | 449.3268662    |        |
| 621.3682436                                                 | -0.466895108                                           | 0.013927852 | 0.07728315     | ZNF213 |

|                            |                                       |                        |             |             |                |             |
|----------------------------|---------------------------------------|------------------------|-------------|-------------|----------------|-------------|
| 16                         | 3129777                               | 3142805                | +           | 6443        | protein_coding | zinc        |
| finger protein 213         | [Source:HGNC                          | Symbol;Acc:HGNC:13005] | zf-C2H2     | 343         |                |             |
| 505                        | 494                                   | 623                    | 729         | 583         | 2.911392115    |             |
| 3.455709324                | 3.551740875                           |                        | 4.675210093 |             | 4.930579829    |             |
| 4.224024799                |                                       |                        |             |             |                |             |
| ENSG00000272335            | 203.6252549                           |                        | 172.4129122 |             | 135.9139798    |             |
| 308.4055142                | 243.0867274                           |                        | 263.9469747 |             | 170.6507157    |             |
| 271.8130721                | -0.672949932                          |                        | 0.013933919 |             | 0.077288761    |             |
| AC093297.2                 | 5                                     | 44826076               |             | 44828592    | +              | 2517        |
| lincRNA novel transcript   |                                       |                        | -           |             | 176            | 186         |
| 307                        | 266                                   | 269                    | 3.824055309 |             | 3.258094574    | 139         |
| 2.558197325                | 5.897342845                           |                        | 4.605290376 |             | 4.989018338    |             |
| ENSG00000236045            | 27.76708022                           |                        | 8.342560268 |             | 2.933395248    |             |
| 72.32963199                | 27.41579632                           |                        | 50.04199149 |             | 13.01434524    |             |
| 49.92913993                | -1.955775149                          |                        | 0.013952281 |             | 0.077362538    |             |
| AL031283.3                 | 1                                     | 15334166               |             | 15335464    | -              | 727         |
| antisense novel transcript |                                       |                        | -           |             | 24             | 9           |
| 3                          | 72                                    | 30                     | 51          | 1.805392124 | 0.545810714    |             |
| 0.191156601                | 4.788497908                           |                        | 1.79823084  |             | 3.274777525    |             |
| ENSG00000172845            | 2722.330823                           |                        | 1859.463989 |             | 2170.712484    |             |
| 1688.695991                | 1790.2515                             |                        | 1641.573564 |             | 2250.835765    |             |
| 1706.840352                | 0.398556152                           |                        | 0.013991493 |             | 0.077551835    | SP3         |
| 2                          | 173906459                             |                        | 173965702   |             | -              | 10704       |
| protein_coding             | Sp3 transcription factor              | [Source:HGNC           |             |             |                |             |
| Symbol;Acc:HGNC:11208]     | zf-C2H2                               | 2353                   | 2006        | 2220        | 1681           | 1959        |
| 1673                       | 12.02182881                           |                        | 8.262639146 |             | 9.607476477    |             |
| 7.593164865                | 7.975298252                           |                        | 7.296185656 |             |                |             |
| ENSG00000240857            | 306.5948441                           |                        | 366.1457006 |             | 346.1406393    |             |
| 531.4218795                | 417.633964                            |                        | 510.2320701 |             | 339.6270613    |             |
| 486.4293045                | -0.516980624                          |                        | 0.01400081  |             | 0.07757535     | RDH14       |
| 2                          | 18554723                              |                        | 18560680    |             | -              | 1587        |
| protein_coding             | retinol dehydrogenase 14              | [Source:HGNC           |             |             |                |             |
| Symbol;Acc:HGNC:19979]     | -                                     | 265                    | 395         | 354         | 529            | 457         |
| 520                        | 9.131952838                           |                        | 10.97372637 |             | 10.33305619    |             |
| 16.1168425                 | 12.54867498                           |                        | 15.29580903 |             |                |             |
| ENSG00000272072            | 12.72657843                           |                        | 6.488657986 |             | 15.64477466    |             |
| 80.36625776                | 16.44947779                           |                        | 35.3237587  |             | 11.62000369    |             |
| 44.04649809                | -1.924251169                          |                        | 0.014008211 |             | 0.077588231    |             |
| AC004492.1                 | 7                                     | 107192559              |             | 107193300   | -              | 742         |
| antisense                  | "novel transcript, antisense to HBP1" |                        |             |             |                | -           |
| 11                         | 7                                     | 16                     | 80          | 18          | 36             | 0.810743532 |
| 0.415937515                | 0.998891996                           |                        | 5.212994878 |             | 1.057127079    |             |
| 2.264877051                |                                       |                        |             |             |                |             |
| ENSG00000082438            | 414.1922799                           |                        | 261.4002217 |             | 421.4311174    |             |
| 254.1582902                | 220.2402305                           |                        | 232.5480781 |             | 365.6745397    |             |
| 235.6488662                | 0.633116865                           |                        | 0.014014379 |             | 0.077594283    | COBLL1      |
| 2                          | 164653624                             |                        | 164843679   |             | -              | 17178       |
| protein_coding             | codon-bleu WH2 repeat protein like 1  | [Source:HGNC           |             |             |                |             |
| Symbol;Acc:HGNC:23571]     | -                                     | 358                    | 282         | 431         | 253            | 241         |
| 237                        | 1.139738296                           |                        | 0.723786482 |             | 1.162270266    |             |



|                                                                             |                                                                                                                  |             |              |                    |             |                   |
|-----------------------------------------------------------------------------|------------------------------------------------------------------------------------------------------------------|-------------|--------------|--------------------|-------------|-------------------|
| 0.712113369                                                                 | 0.611368477                                                                                                      | 0.644053261 |              |                    |             |                   |
| ENSG00000166913                                                             | 11942.15842                                                                                                      | 10253.93352 | 10105.54663  |                    |             |                   |
| 8488.685976                                                                 | 9119.407717                                                                                                      | 8644.508727 | 10767.21286  |                    |             |                   |
| 8750.867473                                                                 | 0.299036807                                                                                                      | 0.014079701 | 0.077927729  | YWHAB              |             |                   |
| 20                                                                          | 44885676                                                                                                         | 44908532    | + 7933       |                    |             |                   |
| protein_coding                                                              | tyrosine 3-monooxygenase/tryptophan 5-monooxygenase activation protein beta [Source:HGNC Symbol;Acc:HGNC:12849]  |             |              |                    |             | -                 |
| 10322                                                                       | 11062                                                                                                            | 10335       | 8450         | 9979               | 8810        | 71.15757074       |
| 61.47947608                                                                 | 60.34975099                                                                                                      | 51.50157032 | 54.8161041   |                    |             |                   |
| 51.84232734                                                                 |                                                                                                                  |             |              |                    |             |                   |
| ENSG00000142534                                                             | 14768.61579                                                                                                      | 21559.02963 | 19071.95811  |                    |             |                   |
| 19735.94375                                                                 | 23477.97411                                                                                                      | 31688.3552  | 18466.53451  |                    |             |                   |
| 24967.42435                                                                 | -0.435083765                                                                                                     | 0.014094339 | 0.077980515  | RPS11              |             |                   |
| 19                                                                          | 49496365                                                                                                         | 49499689    | + 1390       |                    |             |                   |
| protein_coding                                                              | ribosomal protein S11 [Source:HGNC Symbol;Acc:HGNC:10384]                                                        |             |              |                    |             | -                 |
| 32295                                                                       | 502.2277803                                                                                                      | 737.7199428 | 650.0303138  | 12765              | 23258       | 19505 19646 25691 |
| 683.3773116                                                                 | 805.4244452                                                                                                      | 1084.592319 |              |                    |             |                   |
| ENSG00000174842                                                             | 595.835263                                                                                                       | 555.2437334 | 541.7003226  |                    |             |                   |
| 321.465031                                                                  | 504.4506523                                                                                                      | 323.8011214 | 564.259773   |                    |             |                   |
| 383.2389349                                                                 | 0.557024549                                                                                                      | 0.014109712 | 0.078037324  | GLMN               |             |                   |
| 1                                                                           | 92246402                                                                                                         | 92298987    | - 2910       |                    |             |                   |
| protein_coding                                                              | "glomulin, FKBP associated protein [Source:HGNC Symbol;Acc:HGNC:14373]"                                          |             |              |                    |             | -                 |
| 330                                                                         | 9.678520021                                                                                                      | 9.075442121 | 8.818997745  | 515                | 599         | 554 320 552       |
| 5.316896494                                                                 | 8.266176735                                                                                                      | 5.293793383 |              |                    |             |                   |
| ENSG00000259039                                                             | 0                                                                                                                | 0           | 15.06867333  | 4.569299387        |             |                   |
| 3.924862078                                                                 | 0                                                                                                                | 7.854278265 | -5.392104452 |                    |             |                   |
| 0.014117666                                                                 | 1                                                                                                                | AL161804.1  | 14           | 57578409           |             |                   |
| 57600404                                                                    | +                                                                                                                | 1430        | antisense    | "novel transcript, |             |                   |
| antisense to SLC35F4"                                                       | -                                                                                                                | 0           | 0            | 0                  | 15          | 5                 |
| 4                                                                           | 0                                                                                                                | 0           | 0            | 0.507173365        | 0.152367578 |                   |
| 0.130577993                                                                 |                                                                                                                  |             |              |                    |             |                   |
| ENSG00000168282                                                             | 9.255693406                                                                                                      | 45.4206059  | 32.26734773  |                    |             |                   |
| 67.30674088                                                                 | 73.10879019                                                                                                      | 94.19668987 | 28.98121568  |                    |             |                   |
| 78.20407365                                                                 | -1.422389724                                                                                                     | 0.014135628 | 0.078147526  | MGAT2              |             |                   |
| 14                                                                          | 49620795                                                                                                         | 49623481    | + 2687       |                    |             |                   |
| protein_coding                                                              | "mannosyl (alpha-1,6-)-glycoprotein beta-1,2-N-acetylglucosaminyltransferase [Source:HGNC Symbol;Acc:HGNC:7045]" |             |              |                    |             |                   |
| -                                                                           | 8                                                                                                                | 49          | 33           | 67                 | 80          | 96                |
| 0.16282348                                                                  | 0.804011705                                                                                                      | 0.568916762 | 1.205614195  |                    |             |                   |
| 1.297420986                                                                 | 1.667821632                                                                                                      |             |              |                    |             |                   |
| ENSG00000165632                                                             | 365.5998895                                                                                                      | 478.3067887 | 572.9898719  |                    |             |                   |
| 724.3008981                                                                 | 664.3761309                                                                                                      | 632.8840101 | 472.29885    |                    |             |                   |
| 673.8536797                                                                 | -0.511360811                                                                                                     | 0.014142786 | 0.078147526  | TAF3               |             |                   |
| 10                                                                          | 7818504                                                                                                          | 8016627     | + 4872       | protein_coding     | TATA-       |                   |
| box binding protein associated factor 3 [Source:HGNC Symbol;Acc:HGNC:17303] | -                                                                                                                | 316         | 516          | 586                | 721         | 727               |
| 645                                                                         | 3.547108849                                                                                                      | 4.669564515 | 5.571765016  |                    |             |                   |
| 7.155322316                                                                 | 6.502580375                                                                                                      | 6.180142241 |              |                    |             |                   |

|                                                 |                                               |                |                     |             |             |
|-------------------------------------------------|-----------------------------------------------|----------------|---------------------|-------------|-------------|
| ENSG00000101335                                 | 852.680755                                    | 1192.986118    | 1050.155499         |             |             |
| 830.7861896                                     | 716.4661439                                   | 736.8928551    | 1031.940791         |             |             |
| 761.3817295                                     | 0.439623092                                   | 0.014144973    | 0.078147526         | MYL9        |             |
| 20                                              | 36541484                                      | 36551447       | +                   | 2821        |             |
| protein_coding                                  | myosin light chain 9 [Source:HGNC             |                |                     |             |             |
| Symbol;Acc:HGNC:15754]                          | -                                             | 737            | 1287                | 1074        | 827         |
| 751                                             | 14.28759445                                   | 20.11450821    | 17.6361446          |             | 784         |
| 14.17436591                                     | 12.11076492                                   | 12.42747467    |                     |             |             |
| ENSG00000166317                                 | 13.88354011                                   | 9.269511408    | 0.977798416         |             | 0           |
| 0                                               | 0                                             | 8.043616644    | 0                   | 5.498028297 |             |
| 0.014165205                                     | 1                                             | SYNP02L 10     | 73644881            | 73663803    |             |
| -                                               | 5147                                          | protein_coding | synaptopodin 2 like |             |             |
| [Source:HGNC Symbol;Acc:HGNC:23532]             | -                                             | 12             | 10                  |             | 1           |
| 0                                               | 0                                             | 0              | 0.127503407         | 0.085660339 |             |
| 0.00900012                                      | 0                                             | 0              | 0                   |             |             |
| ENSG00000236453                                 | 111.0683209                                   | 124.2114529    | 29.33395248         |             |             |
| 259.1811813                                     | 157.1838989                                   | 156.0132676    | 88.20457541         |             |             |
| 190.7927826                                     | -1.113634343                                  | 0.014171179    | 0.078264025         |             |             |
| AC003092.1                                      | 7                                             | 94022833       | 94066661            | +           | 1064        |
| lincRNA                                         | novel transcript                              |                | -                   | 96          | 134         |
| 258                                             | 172                                           | 159            | 4.934285994         | 5.552609456 | 30          |
| 1.306117001                                     | 11.72409407                                   | 7.044422843    | 6.975920654         |             |             |
| ENSG00000134851                                 | 1318.93631                                    | 1376.522444    | 1702.347043         |             |             |
| 956.3584674                                     | 1089.320974                                   | 1249.087356    | 1465.935266         |             |             |
| 1098.255599                                     | 0.416789981                                   | 0.014181173    | 0.078290931         |             |             |
| TMEM165 4                                       | 55395957                                      | 55453397       | +                   | 7045        |             |
| protein_coding                                  | transmembrane protein 165 [Source:HGNC        |                |                     |             |             |
| Symbol;Acc:HGNC:30760]                          | -                                             | 1140           | 1485                | 1741        | 952         |
| 1273                                            | 8.849496598                                   | 9.293502373    | 11.44775245         |             | 1192        |
| 6.533669577                                     | 7.373163351                                   | 8.435162277    |                     |             |             |
| ENSG00000162631                                 | 242.9619519                                   | 88.98730952    | 94.84644637         |             |             |
| 27.12361199                                     | 55.74545252                                   | 95.17790539    | 142.2652359         |             |             |
| 59.34898997                                     | 1.25826874                                    | 0.014207513    | 0.078408031         | NTNG1       |             |
| 1                                               | 107140007                                     | 107483458      | +                   | 9138        |             |
| protein_coding                                  | netrin G1 [Source:HGNC Symbol;Acc:HGNC:23319] |                |                     |             |             |
| 210                                             | 96                                            | 97             | 27                  | 61          | 97          |
| 0.463184521                                     | 0.491725846                                   | 0.142861046    | 0.290895685         |             |             |
| 0.495526194                                     |                                               |                |                     |             |             |
| ENSG00000267500                                 | 35.86581195                                   | 23.17377852    | 44.97872714         |             |             |
| 6.027469332                                     | 6.397019142                                   | 14.71823279    | 34.67277254         |             |             |
| 9.047573755                                     | 1.938744003                                   | 0.014222185    | 0.078460678         |             |             |
| ZNF887P 19                                      | 11648364                                      | 11652877       | +                   | 1407        |             |
| transcribed_unprocessed_pseudogene              | "zinc finger protein 887,                     |                |                     |             |             |
| pseudogene [Source:HGNC Symbol;Acc:HGNC:38700]" | -                                             | 31             | 25                  |             |             |
| 46                                              | 6                                             | 7              | 15                  | 1.204931364 | 0.783393329 |
| 1.514489233                                     | 0.206185618                                   | 0.216801629    | 0.497671989         |             |             |
| ENSG00000224078                                 | 113.3822442                                   | 111.2341369    | 131.0249878         |             |             |
| 264.2040724                                     | 170.8917971                                   | 172.6939314    | 118.547123          |             |             |
| 202.5966003                                     | -0.772297513                                  | 0.014256663    | 0.078622513         | SNHG14      |             |
| 15                                              | 24978583                                      | 25419462       | +                   | 43324       |             |

|                        |                                     |                                     |                      |             |          |             |
|------------------------|-------------------------------------|-------------------------------------|----------------------|-------------|----------|-------------|
| processed_transcript   | small nucleolar RNA                 | host gene 14                        | [Source:HGNC         |             |          |             |
| Symbol;Acc:HGNC:37462] | -                                   | 98                                  | 120                  | 134         | 263      | 187         |
| 176                    | 0.123706421                         | 0.122119961                         | 0.143277735          |             |          |             |
| 0.293513728            | 0.188092577                         | 0.189640092                         |                      |             |          |             |
| ENSG00000189157        | 8.09873173                          | 8.342560268                         | 5.866790497          | 0           |          |             |
| 0                      | 0                                   | 7.436027498                         | 0                    | 5.387192528 |          |             |
| 0.014260085            | 1                                   | FAM47E                              | 4                    | 76214040    | 76283780 |             |
| +                      | 9508                                | protein_coding                      | family with sequence |             |          |             |
| similarity 47 member E | [Source:HGNC Symbol;Acc:HGNC:34343] |                                     |                      | -           |          |             |
| 7                      | 9                                   | 6                                   | 0                    | 0           | 0        | 0.040262763 |
| 0.041733739            | 0.029232404                         | 0                                   | 0                    | 0           | 0        |             |
| ENSG00000138944        | 1036.637661                         | 1068.774665                         | 1605.544999          |             |          |             |
| 818.7312509            | 997.0211263                         | 841.8829157                         | 1236.985775          |             |          |             |
| 885.878431             | 0.481758044                         | 0.01427095                          | 0.078672925          |             |          |             |
| SHISAL1 22             | 44243667                            | 44312851                            | -                    | 6751        |          |             |
| protein_coding         | shisa like 1                        | [Source:HGNC Symbol;Acc:HGNC:29335] |                      |             |          |             |
| -                      | 896                                 | 1153                                | 1642                 | 815         | 1091     | 858         |
| 7.258294985            | 7.53000314                          | 11.26697941                         | 5.837013762          |             |          |             |
| 7.042311649            | 5.932875238                         |                                     |                      |             |          |             |
| ENSG00000177410        | 1034.323738                         | 1004.815037                         | 881.9741714          |             |          |             |
| 1000.559909            | 1398.205612                         | 1647.460857                         | 973.7043154          |             |          |             |
| 1348.742126            | -0.470349029                        | 0.0142851                           | 0.078722542          |             |          | ZFAS1       |
| 20                     | 49278178                            | 49295738                            | +                    | 2243        |          |             |
| antisense              | ZNFx1 antisense                     | RNA 1                               | [Source:HGNC         |             |          |             |
| Symbol;Acc:HGNC:33101] | -                                   | 894                                 | 1084                 | 902         | 996      | 1530        |
| 1679                   | 21.79731287                         | 21.3075721                          | 18.62857865          |             |          |             |
| 21.46996227            | 29.72492414                         | 34.94358496                         |                      |             |          |             |
| ENSG00000108468        | 2263.017038                         | 2411.926868                         | 2724.146387          |             |          |             |
| 1889.611636            | 1988.559093                         | 1991.867505                         | 2466.363431          |             |          |             |
| 1956.679411            | 0.334141582                         | 0.01429289                          | 0.078733233          |             |          | CBX1        |
| 17                     | 48070052                            | 48101521                            | -                    | 3087        |          |             |
| protein_coding         | chromobox 1                         | [Source:HGNC Symbol;Acc:HGNC:1551]  |                      |             | -        |             |
| 1956                   | 2602                                | 2786                                | 1881                 | 2176        | 2030     | 34.65189053 |
| 37.1624742             | 41.80680112                         | 29.46140013                         | 30.71714581          |             |          |             |
| 30.6976722             |                                     |                                     |                      |             |          |             |
| ENSG00000104081        | 13.88354011                         | 18.53902282                         | 44.97872714          |             |          |             |
| 64.29300621            | 91.38598774                         | 54.94806909                         | 25.80043002          |             |          |             |
| 70.20902101            | -1.440163212                        | 0.014299832                         | 0.078733233          |             |          | BMF         |
| 15                     | 40087890                            | 40108892                            | -                    | 5447        |          |             |
| protein_coding         | Bcl2 modifying                      | factor                              | [Source:HGNC         |             |          |             |
| Symbol;Acc:HGNC:24132] | -                                   | 12                                  | 20                   | 46          | 64       | 100         |
| 56                     | 0.120481006                         | 0.161884988                         | 0.391203663          |             |          |             |
| 0.568098726            | 0.800020697                         | 0.479928662                         |                      |             |          |             |
| ENSG00000183735        | 1072.503473                         | 869.4801701                         | 916.1971159          |             |          |             |
| 671.0582523            | 710.9829846                         | 762.4044586                         | 952.7269198          |             |          |             |
| 714.8152319            | 0.413792693                         | 0.014302492                         | 0.078733233          |             |          | TBK1        |
| 12                     | 64451880                            | 64502108                            | +                    | 4762        |          |             |
| protein_coding         | TANK binding                        | kinase 1                            | [Source:HGNC         |             |          |             |
| Symbol;Acc:HGNC:11584] | -                                   | 927                                 | 938                  | 937         | 668      | 778         |
| 777                    | 10.64596553                         | 8.684551707                         | 9.114915684          |             |          |             |

|                                           |                                               |                |                       |                |          |      |
|-------------------------------------------|-----------------------------------------------|----------------|-----------------------|----------------|----------|------|
| 6.782476347                               | 7.119488677                                   | 7.616889646    |                       |                |          |      |
| ENSG00000147041                           | 105.2835125                                   | 50.98231275    | 75.29047804           |                |          |      |
| 40.18312888                               | 31.98509571                                   | 24.53038799    | 77.18543443           |                |          |      |
| 32.23287086                               | 1.257436055                                   | 0.014338089    | 0.078900783           | SYTL5          |          |      |
| X                                         | 38006582                                      | 38128819       | + 4791                |                |          |      |
| protein_coding                            | synaptotagmin like 5 [Source:HGNC             |                |                       |                |          |      |
| Symbol;Acc:HGNC:15589]                    | -                                             | 91             | 55                    | 77             | 40       | 35   |
| 25                                        | 1.038747363                                   | 0.506139785    | 0.744503957           |                |          |      |
| 0.403677959                               | 0.318346787                                   | 0.243590235    |                       |                |          |      |
| ENSG00000162825                           | 160.8176729                                   | 144.604378     | 162.3145371           |                |          |      |
| 309.4100924                               | 210.1877718                                   | 231.5668626    | 155.912196            |                |          |      |
| 250.3882423                               | -0.683361108                                  | 0.014347511    | 0.078924215           | NBPF20         |          |      |
| 1                                         | 145289900                                     | 145405778      | - 18995               |                |          |      |
| protein_coding                            | NBPF member 20 [Source:HGNC                   |                |                       |                |          |      |
| Symbol;Acc:HGNC:32000]                    | -                                             | 139            | 156                   | 166            | 308      | 230  |
| 236                                       |                                               |                |                       |                |          |      |
| 0.40019367                                | 0.362092274                                   | 0.404828655    | 0.783993812           |                |          |      |
| 0.52765145                                | 0.579987643                                   |                |                       |                |          |      |
| ENSG00000132622                           | 5.784808379                                   | 20.3929251     | 31.28954932           |                |          |      |
| 56.25638043                               | 49.34843338                                   | 69.66630188    | 19.15576093           |                |          |      |
| 58.42370523                               | -1.598845481                                  | 0.014373323    | 0.079012466           |                |          |      |
| HSPA12B 20                                | 3732667                                       | 3753111        | + 3151                | protein_coding | heat     |      |
| shock protein family A (Hsp70) member 12B | [Source:HGNC                                  |                |                       |                |          |      |
| Symbol;Acc:HGNC:16193]                    | -                                             | 5              | 22                    | 32             | 56       | 54   |
| 71                                        | 0.086779334                                   | 0.307828081    | 0.470439772           |                |          |      |
| 0.859292142                               | 0.74679939                                    | 1.051855256    |                       |                |          |      |
| ENSG0000004897                            | 4227.537963                                   | 3212.812654    | 3980.617352           |                |          |      |
| 3190.540433                               | 2981.92478                                    | 2767.027765    | 3806.989323           |                |          |      |
| 2979.830993                               | 0.353203294                                   | 0.014373891    | 0.079012466           | CDC27          |          |      |
| 17                                        | 47117703                                      | 47189422       | - 6824                |                |          |      |
| protein_coding                            | cell division cycle 27 [Source:HGNC           |                |                       |                |          |      |
| Symbol;Acc:HGNC:1728]                     | -                                             | 3654           | 3466                  | 4071           | 3176     | 3263 |
| 2820                                      | 29.2835846                                    | 22.39357843    | 27.63532269           |                |          |      |
| 22.50311772                               | 20.83707013                                   | 19.29106152    |                       |                |          |      |
| ENSG00000140675                           | 3.470885027                                   | 10.19646255    | 5.866790497           |                |          |      |
| 68.3113191                                | 21.93263706                                   | 8.830939675    | 6.511379358           |                |          |      |
| 33.02496528                               | -2.32997264                                   | 0.014382658    | 0.07903224            | SLC5A2         |          |      |
| 16                                        | 31483002                                      | 31490860       | + 4468                |                |          |      |
| protein_coding                            | solute carrier family 5 member 2 [Source:HGNC |                |                       |                |          |      |
| Symbol;Acc:HGNC:11037]                    | -                                             | 3              | 11                    | 6              | 68       | 24   |
| 9                                         | 0.036720011                                   | 0.108545914    | 0.062207184           |                |          |      |
| 0.735862997                               | 0.234075886                                   | 0.094031937    |                       |                |          |      |
| ENSG00000137252                           | 9.255693406                                   | 2.780853423    | 10.75578258           | 0              |          |      |
| 0                                         | 0                                             | 7.597443135    | 0                     | 5.416677039    |          |      |
| 0.014414757                               | 1                                             | HCRTR2         | 6                     | 55106460       | 55282620 |      |
| +                                         | 1964                                          | protein_coding | hypocretin receptor 2 |                |          |      |
| [Source:HGNC                              | Symbol;Acc:HGNC:4849]                         |                |                       |                |          |      |
| 0                                         | 0                                             | 0              | 0.222763081           | 0.067346298    |          | 11   |
| 0.25944999                                | 0                                             | 0              | 0                     |                |          |      |
| ENSG00000078124                           | 1074.817397                                   | 882.4574861    | 968.9982304           |                |          |      |
| 738.3649932                               | 780.4363353                                   | 688.8132947    | 975.4243711           |                |          |      |

|                                                     |                                    |                       |                                     |               |
|-----------------------------------------------------|------------------------------------|-----------------------|-------------------------------------|---------------|
| 735.8715411                                         | 0.405867912                        | 0.01444808            | 0.079363203                         | ACER3         |
| 11                                                  | 76860867                           | 77026797              | + 8442                              |               |
| protein_coding                                      | alkaline ceramidase 3 [Source:HGNC |                       |                                     |               |
| Symbol;Acc:HGNC:16066]                              | -                                  | 929 952               | 991 735                             | 854           |
| 702                                                 | 6.018178695                        | 4.971936331           | 5.43789431                          |               |
| 4.20962304                                          | 4.408299782                        | 3.881841513           |                                     |               |
| ENSG00000137857                                     | 9.255693406                        | 26.88158308           | 29.33395248                         |               |
| 92.42119643                                         | 29.24351608                        | 74.57237948           | 21.82374299                         |               |
| 65.41236399                                         | -1.574539773                       | 0.014470426           | 0.0794574                           | DUOX1         |
| 15                                                  | 45129933                           | 45165576              | + 8784                              |               |
| protein_coding                                      | dual oxidase 1 [Source:HGNC        | Symbol;Acc:HGNC:3062] |                                     |               |
| -                                                   | 8 29                               | 30 92                 | 32 76                               |               |
| 0.049807228                                         | 0.14555919                         | 0.158209072           | 0.506403521                         |               |
| 0.158750919                                         | 0.403893906                        |                       |                                     |               |
| ENSG00000233077                                     | 6.941770054                        | 7.415609127           | 7.822387329                         | 0             |
| 0                                                   | 0                                  | 7.393255503           | 0                                   | 5.379395446   |
| 0.014485959                                         | 1                                  | LINC01271             | 20                                  | 50310711      |
| 50321342                                            | -                                  | 2250                  | lincRNA long intergenic non-protein |               |
| coding RNA 1271 [Source:HGNC                        | Symbol;Acc:HGNC:50327]             | -                     | 6                                   |               |
| 8                                                   | 8                                  | 0                     | 0                                   | 0.145835564   |
| 0.156762228                                         | 0.164706191                        | 0                     | 0                                   |               |
| ENSG00000008226                                     | 5.784808379                        | 18.53902282           | 12.71137941                         | 0             |
| 0                                                   | 1.962431039                        | 12.3450702            | 0.65414368                          |               |
| 4.253193383                                         | 0.014526721                        | 1                     | DLEC1 3                             | 38039205      |
| 38124025                                            | +                                  | 8338                  | protein_coding                      | "DLEC1, cilia |
| and flagella associated protein [Source:HGNC        | Symbol;Acc:HGNC:2899]"             |                       |                                     |               |
| -                                                   | 5 20                               | 13 0                  | 0 2                                 |               |
| 0.032794637                                         | 0.105755281                        | 0.072224396           | 0 0                                 |               |
| 0.011197321                                         |                                    |                       |                                     |               |
| ENSG00000279140                                     | 0                                  | 18.53902282           | 8.800185745                         | 0 0           |
| 0                                                   | 9.113069521                        | 0                     | 5.684948787                         | 0.014538494   |
| 1                                                   | AL590326.1                         | 14                    | 104815449                           | 104815753     |
| -                                                   | 305                                | TEC                   | novel transcript                    | - 0           |
| 20                                                  | 9                                  | 0                     | 0 0                                 | 2.891106661   |
| 1.366926383                                         | 0                                  | 0                     | 0                                   |               |
| ENSG00000033170                                     | 1019.283236                        | 915.8277272           | 1074.600459                         |               |
| 592.701151                                          | 893.7549601                        | 695.6818033           | 1003.237141                         |               |
| 727.3793048                                         | 0.463245707                        | 0.014543248           | 0.079804431                         | FUT8          |
| 14                                                  | 65410592                           | 65744121              | + 6700                              |               |
| protein_coding                                      | fucosyltransferase 8 [Source:HGNC  |                       |                                     |               |
| Symbol;Acc:HGNC:4019]                               | -                                  | 881 988               | 1099 590                            | 978           |
| 709                                                 | 7.191108119                        | 6.501537919           | 7.59845587                          |               |
| 4.257733018                                         | 6.360959784                        | 4.939892161           |                                     |               |
| ENSG00000258770                                     | 9.255693406                        | 3.707804563           | 4.888992081                         |               |
| 47.21517644                                         | 38.38211485                        | 5.887293117           | 5.950830017                         |               |
| 30.49486147                                         | -2.370336169                       | 0.014544067           | 0.079804431                         |               |
| LINC02330                                           | 14                                 | 87634379              | 87655294                            | -             |
| lincRNA long intergenic non-protein coding RNA 2330 |                                    |                       |                                     | 555           |
| [Source:HGNC                                        | Symbol;Acc:HGNC:53250]             | -                     | 8 4                                 | 5             |
| 47                                                  | 42                                 | 6                     | 0.788300345                         | 0.317761273   |

|                                     |                                                     |                                     |                         |             |
|-------------------------------------|-----------------------------------------------------|-------------------------------------|-------------------------|-------------|
| 0.417329877                         | 4.094549175                                         | 3.297728557                         | 0.504666298             |             |
| ENSG00000115221                     | 3.470885027                                         | 9.269511408                         | 9.777984162             | 0           |
| 0                                   | 0                                                   | 7.506126866                         | 0                       | 5.403631751 |
| 0.014549766                         | 1                                                   | ITGB6                               | 2                       | 160099666   |
| -                                   | 4687                                                | protein_coding                      | integrin subunit beta 6 | 160200313   |
| [Source:HGNC Symbol;Acc:HGNC:6161]  | -                                                   | 3                                   | 10                      | 10          |
| 0                                   | 0                                                   | 0                                   | 0.035004269             | 0.094067371 |
| 0.098834257                         | 0                                                   | 0                                   | 0                       |             |
| ENSG00000139651                     | 638.642845                                          | 697.9942091                         | 748.9935868             |             |
| 1106.040622                         | 810.5937113                                         | 915.4740797                         | 695.2102136             |             |
| 944.0361378                         | -0.44066635                                         | 0.014550496                         | 0.079811064             | ZNF740      |
| 12                                  | 53180700                                            | 53195141                            | +                       | 9063        |
| protein_coding                      | zinc finger protein 740                             | [Source:HGNC                        |                         |             |
| Symbol;Acc:HGNC:27465]              | zf-C2H2                                             | 552                                 | 753                     | 766         |
| 933                                 | 3.330901656                                         | 3.663168991                         | 3.915247721             | 1101        |
| 5.873764843                         | 4.264913601                                         | 4.805689416                         |                         | 887         |
| ENSG00000267011                     | 2.313923351                                         | 2.780853423                         | 2.933395248             |             |
| 22.10072088                         | 3.65543951                                          | 34.34254318                         | 2.676057341             |             |
| 20.03290119                         | -2.898675609                                        | 0.014573318                         | 1                       | AC011498.1  |
| 19                                  | 4457962                                             | 4471493                             | -                       | 837         |
| transcript                          | -                                                   | 2                                   | 3                       | 3           |
| 0.130677029                         | 0.158026439                                         | 0.166034467                         | 22                      | 4           |
| 0.208253894                         | 1.952039593                                         |                                     | 1.270862132             | 35          |
| ENSG0000099968                      | 1176.630024                                         | 1272.703916                         | 1127.401574             |             |
| 1368.235538                         | 1668.708136                                         | 1583.681848                         | 1192.245171             |             |
| 1540.208508                         | -0.369461108                                        | 0.014579631                         | 0.079915682             |             |
| BCL2L13                             | 22                                                  | 17628855                            | 17730855                | +           |
| protein_coding                      | BCL2 like 13                                        | [Source:HGNC Symbol;Acc:HGNC:17164] | +                       | 7662        |
| -                                   | 1017                                                | 1373                                | 1153                    | 1362        |
| 7.258945204                         | 7.900641352                                         | 6.970912243                         | 1826                    | 1614        |
| 10.3852564                          | 9.83348407                                          |                                     | 8.594807941             |             |
| ENSG00000163629                     | 581.9517229                                         | 482.0145932                         | 624.8131879             |             |
| 449.0464652                         | 399.3567664                                         | 335.5757077                         | 562.9265014             |             |
| 394.6596464                         | 0.512064                                            | 0.0145933                           | 0.079915682             | PTPN13      |
| 4                                   | 86594315                                            | 86815171                            | +                       | 9496        |
| protein_coding                      | "protein tyrosine phosphatase, non-receptor type 13 |                                     |                         |             |
| [Source:HGNC Symbol;Acc:HGNC:9646]" | -                                                   | 503                                 | 520                     | 639         |
| 447                                 | 437                                                 | 342                                 | 2.896823212             | 2.414329804 |
| 3.117185217                         | 2.275977863                                         | 2.005392234                         | 1.681246665             |             |
| ENSG00000160062                     | 217.508795                                          | 119.5766972                         | 199.4708769             |             |
| 40.18312888                         | 104.180026                                          | 118.7270779                         | 178.852123              |             |
| 87.69674425                         | 1.025903301                                         | 0.014594653                         | 0.079915682             | ZBTB8A      |
| 1                                   | 32539427                                            | 32605939                            | +                       | 7075        |
| protein_coding                      | zinc finger and BTB domain containing 8A            | [Source:HGNC                        |                         |             |
| Symbol;Acc:HGNC:24172]              | ZBTB                                                | 188                                 | 129                     | 204         |
| 121                                 | 1.453202438                                         | 0.803891107                         | 1.335691552             | 40          |
| 0.273359873                         | 0.702161487                                         | 0.798371384                         |                         | 114         |
| ENSG00000172315                     | 1109.526247                                         | 949.1979682                         | 870.2405904             |             |
| 1393.349994                         | 1534.370734                                         | 1056.769114                         | 976.3216019             |             |
| 1328.163281                         | -0.444674524                                        | 0.014598978                         | 0.079915682             | TP53RK      |

|                        |                               |                                   |                           |             |       |
|------------------------|-------------------------------|-----------------------------------|---------------------------|-------------|-------|
| 20                     | 46684365                      | 46689779                          | -                         | 3520        |       |
| protein_coding         | TP53 regulating               | kinase [Source:HGNC               |                           |             |       |
| Symbol;Acc:HGNC:16197] | -                             | 959 1024                          | 890                       | 1387        | 1679  |
| 1077                   | 14.89946439                   | 12.82600046                       | 11.71250526               |             |       |
| 19.05175615            | 20.78579455                   | 14.28298814                       |                           |             |       |
| ENSG00000112851        | 2444.660021                   | 2236.733103                       | 2237.202776               |             |       |
| 1891.620792            | 1913.622583                   | 1706.333788                       | 2306.198633               |             |       |
| 1837.192388            | 0.327773812                   | 0.014600578                       | 0.079915682               |             | ERBIN |
| 5                      | 65926475                      | 66082549                          | +                         | 10216       |       |
| protein_coding         | erbB2 interacting             | protein [Source:HGNC              |                           |             |       |
| Symbol;Acc:HGNC:15842] | -                             | 2113 2413                         | 2288                      | 1883        | 2094  |
| 1739                   | 11.31132096                   | 10.41382789                       | 10.37474884               |             |       |
| 8.911907133            | 8.932116746                   | 7.94629591                        |                           |             |       |
| ENSG00000145012        | 3320.480009                   | 2422.123331                       | 3214.023394               |             |       |
| 2229.159075            | 2213.368623                   | 2466.775816                       | 2985.542245               |             |       |
| 2303.101171            | 0.374154808                   | 0.014600935                       | 0.079915682               |             | LPP   |
| 3                      | 188153284                     | 188890671                         | +                         | 25535       |       |
| protein_coding         | LIM domain containing         | preferred translocation partner   |                           |             |       |
| in lipoma [Source:HGNC | Symbol;Acc:HGNC:6679]         | -                                 | 2870                      | 2613        |       |
| 3287                   | 2219 2422                     | 2514 6.146682027                  | 4.511671862               |             |       |
| 5.963020435            | 4.201676934                   | 4.133299489                       | 4.595951605               |             |       |
| ENSG00000127580        | 475.5112487                   | 602.5182416                       | 604.2794212               |             |       |
| 817.7266727            | 711.8968445                   | 766.3293207                       | 560.7696372               |             |       |
| 765.3176126            | -0.447404739                  | 0.014642372                       | 0.080113795               |             | WDR24 |
| 16                     | 684622 690444                 | - 3651                            | protein_coding            | WD          |       |
| repeat domain 24       | [Source:HGNC                  | Symbol;Acc:HGNC:20852]            | -                         | 411         |       |
| 650                    | 618 814                       | 779 781                           | 6.156369837               |             |       |
| 7.8493823              | 7.841138012                   | 10.77987658                       | 9.297886116               |             |       |
| 9.985854567            |                               |                                   |                           |             |       |
| ENSG00000135637        | 105.2835125                   | 116.7958437                       | 142.7585688               |             |       |
| 214.9797395            | 186.427415                    | 201.1491815                       | 121.6126417               |             |       |
| 200.852112             | -0.722266335                  | 0.014684394                       | 0.080301744               |             |       |
| CCDC142 2              | 74471986                      | 74483408                          | -                         | 4897        |       |
| protein_coding         | coiled-coil domain containing | 142 [Source:HGNC                  |                           |             |       |
| Symbol;Acc:HGNC:25889] | -                             | 91 126                            | 146                       | 214         | 204   |
| 205                    | 1.016262735                   | 1.13442137                        | 1.381100262               |             |       |
| 2.112928912            | 1.815342859                   | 1.954203527                       |                           |             |       |
| ENSG00000204899        | 2869.264956                   | 2819.78537                        | 2506.097341               |             |       |
| 1742.943215            | 2529.564141                   | 1969.299548                       | 2731.715889               |             |       |
| 2080.602301            | 0.39250977                    | 0.01468723                        | 0.080301744               |             | MZT1  |
| 13                     | 72708357                      | 72727687                          | -                         | 2299        |       |
| protein_coding         | mitotic spindle               | organizing protein 1 [Source:HGNC |                           |             |       |
| Symbol;Acc:HGNC:33830] | -                             | 2480 3042                         | 2563                      | 1735        | 2768  |
| 2007                   | 58.99394274                   | 58.33835735                       | 51.64307465               |             |       |
| 36.48898008            | 52.46693715                   | 40.75251698                       |                           |             |       |
| ENSG00000072858        | 2.313923351                   | 18.53902282                       | 2.933395248               |             | 0     |
| 0                      | 0                             | 7.928780472                       | 0                         | 5.484343532 |       |
| 0.01474011             | 1                             | SIDT1 3                           | 113532296                 | 113629578   |       |
| +                      | 8060                          | protein_coding                    | SID1 transmembrane family |             |       |
| member 1 [Source:HGNC  | Symbol;Acc:HGNC:25967]        | -                                 | 2                         | 20          |       |

|                 |                                                                                             |       |             |             |             |            |
|-----------------|---------------------------------------------------------------------------------------------|-------|-------------|-------------|-------------|------------|
| 3               | 0                                                                                           | 0     | 0           | 0.013570307 | 0.10940292  |            |
| 0.017242041     | 0                                                                                           | 0     | 0           | 0           |             |            |
| ENSG00000100097 | 8450.448079                                                                                 |       | 11256.89465 | 12638.04453 |             |            |
| 6384.094601     | 7381.24623                                                                                  |       | 10072.17731 | 10781.79575 |             |            |
| 7945.839379     | 0.440404004                                                                                 |       | 0.01474202  | 0.080572489 |             | LGALS1     |
| 22              | 37675608                                                                                    |       | 37679806    | +           | 1099        |            |
| protein_coding  | galectin 1 [Source:HGNC Symbol;Acc:HGNC:6561]                                               |       |             |             |             | -          |
| 7304            | 12144                                                                                       | 12925 | 6355        | 8077        | 10265       | 363.460973 |
| 487.1896171     | 544.7977624                                                                                 |       | 279.5883551 |             | 320.2661125 |            |
| 436.0208901     |                                                                                             |       |             |             |             |            |
| ENSG00000122299 | 1347.860352                                                                                 |       | 1073.409421 | 1156.735526 |             |            |
| 1032.706412     | 798.7135329                                                                                 |       | 839.9204847 | 1192.668433 |             |            |
| 890.4468099     | 0.421323933                                                                                 |       | 0.014759696 | 0.08064027  |             | ZC3H7A     |
| 16              | 11750586                                                                                    |       | 11797267    | -           | 7076        |            |
| protein_coding  | zinc finger CCCH-type containing 7A [Source:HGNC Symbol;Acc:HGNC:30959]                     |       |             |             |             | -          |
| 856             | 9.003944593                                                                                 |       | 7.215304986 | 7.744606854 |             | 874        |
| 7.024355888     | 5.38247729                                                                                  |       | 5.647184492 |             |             |            |
| ENSG00000124659 | 572.6960295                                                                                 |       | 654.4275054 | 532.9001368 |             |            |
| 651.9712661     | 861.7698644                                                                                 |       | 935.0983901 | 586.6745572 |             |            |
| 816.2798402     | -0.476386661                                                                                |       | 0.014796045 | 0.080781087 |             | TBCC       |
| 6               | 42744481                                                                                    |       | 42746096    | -           | 1616        |            |
| protein_coding  | tubulin folding cofactor C [Source:HGNC Symbol;Acc:HGNC:11580]                              |       |             |             |             | -          |
| 953             | 16.75168721                                                                                 |       | 495         | 706         | 545         | 649        |
| 19.41800269     | 25.42897964                                                                                 |       | 19.26181922 | 15.62275426 |             | 943        |
| ENSG00000053372 | 3564.598923                                                                                 |       | 3926.565033 | 3669.677456 |             |            |
| 4407.08466      | 4791.367337                                                                                 |       | 4501.816803 | 3720.28047  |             |            |
| 4566.756267     | -0.295674371                                                                                |       | 0.014797604 | 0.080781087 |             | MRT04      |
| 1               | 19251539                                                                                    |       | 19260128    | +           | 2822        |            |
| protein_coding  | "MRT4 homolog, ribosome maturation factor [Source:HGNC Symbol;Acc:HGNC:18477]"              |       |             |             |             | -          |
| 4588            | 59.70757071                                                                                 |       | 3081        | 4236        | 3753        | 4387       |
| 75.16433881     | 80.96204065                                                                                 |       | 66.18093522 | 61.60614175 |             |            |
| ENSG00000163964 | 890.8604903                                                                                 |       | 937.1476034 | 1035.488523 |             |            |
| 731.3329456     | 784.0917748                                                                                 |       | 634.8464411 | 954.4988721 |             |            |
| 716.7570539     | 0.413338508                                                                                 |       | 0.014801323 | 0.080781087 |             | PIGX       |
| 3               | 196639775                                                                                   |       | 196736007   | +           | 4446        |            |
| protein_coding  | phosphatidylinositol glycan anchor biosynthesis class X [Source:HGNC Symbol;Acc:HGNC:26046] |       |             |             |             | -          |
| 728             | 858                                                                                         | 647   | 9.471439283 | 10.02572193 |             | 1059       |
| 11.03389781     | 7.917045437                                                                                 |       | 8.409621068 | 6.793301004 |             |            |
| ENSG00000109452 | 541.4580642                                                                                 |       | 286.4279025 | 356.8964219 |             |            |
| 308.4055142     | 217.4986508                                                                                 |       | 206.0552591 | 394.9274629 |             |            |
| 243.9864747     | 0.693538822                                                                                 |       | 0.014807149 | 0.08078404  |             | INPP4B     |
| 4               | 142023160                                                                                   |       | 142847432   | -           | 14153       |            |
| protein_coding  | inositol polyphosphate-4-phosphatase type II B [Source:HGNC Symbol;Acc:HGNC:6075]           |       |             |             |             | -          |
| 307             | 238                                                                                         | 210   | 1.808389843 | 0.96259573  |             | 365        |
| 1.194666852     | 1.048796152                                                                                 |       | 0.732802679 | 0.692654761 |             |            |



|                                     |                                                     |             |                            |             |
|-------------------------------------|-----------------------------------------------------|-------------|----------------------------|-------------|
| ENSG00000184588                     | 252.2176453                                         | 107.5263323 | 188.7150943                |             |
| 84.38457065                         | 110.5770452                                         | 98.12155195 | 182.8196907                |             |
| 97.69438925                         | 0.90105481                                          | 0.014818018 | 0.080814498                | PDE4B       |
| 1                                   | 65792514                                            | 66374579    | + 8644                     |             |
| protein_coding                      | phosphodiesterase 4B [Source:HGNC                   |             |                            |             |
| Symbol;Acc:HGNC:8781]               | -                                                   | 218 116     | 193 84                     | 121         |
| 100                                 | 1.379229216                                         | 0.591666784 | 1.034296385                |             |
| 0.469857046                         | 0.609999122                                         | 0.540046651 |                            |             |
| ENSG00000134186                     | 2444.660021                                         | 2402.657357 | 2733.924372                |             |
| 2162.856912                         | 1824.978175                                         | 2015.416677 | 2527.080583                |             |
| 2001.083921                         | 0.336871818                                         | 0.01483891  | 0.080899579                |             |
| PRPF38B 1                           | 108692323                                           | 108701803   | + 5817                     |             |
| protein_coding                      | pre-mRNA processing factor 38B [Source:HGNC         |             |                            |             |
| Symbol;Acc:HGNC:25512]              | -                                                   | 2113 2592   | 2796 2153                  | 1997        |
| 2054                                | 19.86530082                                         | 19.64580782 | 22.26591563                |             |
| 17.89559665                         | 14.96020686                                         | 16.48342329 |                            |             |
| ENSG00000282849                     | 12.72657843                                         | 8.342560268 | 1.955596832                | 0           |
| 0                                   | 0                                                   | 7.674911844 | 0                          | 5.430375352 |
| 0.014865933                         | 1                                                   | AL359834.1  | 1                          | 200478020   |
| 200483604                           | -                                                   | 638         | lincRNA novel transcript - |             |
| 11                                  | 9                                                   | 2           | 0                          | 0           |
|                                     | 0.621950453                                         | 0.145215098 | 0                          | 0.942902352 |
| ENSG00000176912                     | 31.23796524                                         | 32.44328993 | 58.66790497                |             |
| 5.02289111                          | 19.19105743                                         | 9.812155195 | 40.78305338                |             |
| 11.34203458                         | 1.841542276                                         | 0.0148682   | 0.081024336                | TYMSOS      |
| 18                                  | 641320                                              | 658340      | - 976                      |             |
| bidirectional_promoter_lncRNA       | TYMS opposite strand [Source:HGNC                   |             |                            |             |
| Symbol;Acc:HGNC:29553]              | -                                                   | 27 35       | 60 5                       | 21          |
| 10                                  | 1.512894553                                         | 1.581073955 | 2.847763298                |             |
| 0.247697374                         | 0.937622617                                         | 0.478295416 |                            |             |
| ENSG00000148110                     | 1834.941218                                         | 1736.179487 | 1727.769801                |             |
| 1465.679626                         | 1386.325434                                         | 1358.983494 | 1766.296835                |             |
| 1403.662851                         | 0.33141892                                          | 0.014872394 | 0.081024336                |             |
| MFSD14B 9                           | 94374551                                            | 94461042    | + 3428                     |             |
| protein_coding                      | major facilitator superfamily domain containing 14B |             |                            |             |
| [Source:HGNC Symbol;Acc:HGNC:23376] | -                                                   |             | 1586 1873                  | 1767        |
| 1459                                | 1517                                                | 1385        | 25.30212998                | 24.08967396 |
| 23.87801343                         | 20.57859382                                         | 19.28427719 | 18.86057791                |             |
| ENSG00000100983                     | 1379.098317                                         | 1424.723903 | 1532.210118                |             |
| 1188.416037                         | 1135.927828                                         | 1071.487347 | 1445.344113                |             |
| 1131.943737                         | 0.35280107                                          | 0.014879643 | 0.081034952                | GSS         |
| 20                                  | 34928433                                            | 34956027    | - 6174                     |             |
| protein_coding                      | glutathione synthetase [Source:HGNC                 |             |                            |             |
| Symbol;Acc:HGNC:4624]               | -                                                   | 1192 1537   | 1567 1183                  | 1243        |
| 1092                                | 10.55855151                                         | 10.97592676 | 11.75722494                |             |
| 9.264443476                         | 8.773302446                                         | 8.256615282 |                            |             |
| ENSG00000250990                     | 6.941770054                                         | 9.269511408 | 5.866790497                | 0           |
| 0                                   | 0                                                   | 7.35935732  | 0                          | 5.373076698 |
| 0.01493829                          | 1                                                   | AC098851.1  | 7                          | 77246340    |
| 77258123                            | -                                                   | 570         | antisense novel transcript |             |

|                                      |                                                       |             |             |            |             |             |       |   |
|--------------------------------------|-------------------------------------------------------|-------------|-------------|------------|-------------|-------------|-------|---|
| -                                    | 6                                                     | 10          | 6           | 0          | 0           | 0           |       |   |
| 0.575666699                          | 0.773497835                                           |             | 0.487617014 |            | 0           | 0           | 0     |   |
| ENSG00000115226                      | 220.9796801                                           |             | 243.78815   |            | 149.6031577 |             |       |   |
| 236.0758822                          | 438.6527412                                           |             | 337.5381387 |            | 204.7903293 |             |       |   |
| 337.422254                           | -0.721187281                                          |             | 0.014965791 |            | 0.081472869 |             | FNDC4 |   |
| 2                                    | 27491883                                              |             | 27495245    |            | -           | 1982        |       |   |
| protein_coding                       | fibronectin type III domain containing 4 [Source:HGNC |             |             |            |             |             |       |   |
| Symbol;Acc:HGNC:20239]               | -                                                     |             | 191         | 263        | 153         | 235         | 480   |   |
| 344                                  | 5.270167638                                           |             | 5.85040668  |            | 3.575940109 |             |       |   |
| 5.732782019                          | 10.55349199                                           |             | 8.102160242 |            |             |             |       |   |
| ENSG00000173409                      | 694.1770054                                           |             | 659.0622611 |            | 619.9241958 |             |       |   |
| 375.712255                           | 507.192232                                            |             | 526.912734  |            | 657.7211541 |             |       |   |
| 469.9390737                          | 0.48439394                                            |             | 0.014972918 |            | 0.081472869 |             | ARV1  |   |
| 1                                    | 230978981                                             |             | 231000595   |            | +           | 1987        |       |   |
| protein_coding                       | "ARV1 homolog, fatty acid homeostasis modulator       |             |             |            |             |             |       |   |
| [Source:HGNC Symbol;Acc:HGNC:29561]" | -                                                     |             | 600         | 711        |             |             | 634   |   |
| 374                                  | 555                                                   | 537         | 16.5138409  |            | 15.77631945 |             |       |   |
| 14.78066067                          | 9.100703212                                           |             | 12.17176934 |            | 12.61602249 |             |       |   |
| ENSG00000232098                      | 489.3947888                                           |             | 611.787753  |            | 535.8335321 |             |       |   |
| 1029.692678                          | 608.6306784                                           |             | 729.043131  |            | 545.6720246 |             |       |   |
| 789.1221623                          | -0.531186437                                          |             | 0.014976043 |            | 0.081472869 |             |       |   |
| AC012313.1                           | 19                                                    | 58404238    | 58408484    |            | -           |             | 3417  |   |
| lincRNA                              | novel transcript                                      |             |             |            |             |             |       |   |
| 1025                                 | 666                                                   | 743         | 6.770022333 |            | 423         | 660         | 548   |   |
| 7.429131326                          | 14.50374325                                           |             | 8.493522627 |            | 10.15055692 |             |       |   |
| ENSG00000224715                      | 2.313923351                                           |             | 2.780853423 |            | 0           | 30.13734666 |       |   |
| 11.88017841                          | 7.849724156                                           |             | 1.698258925 |            | 16.62241641 |             |       |   |
| -3.295057699                         | 0.015000027                                           |             | 1           |            | 782186.1    |             | 22    |   |
| 47345569                             | 47373541                                              |             | +           |            | 4364        | lincRNA     |       |   |
| uncharacterized                      | LOC339685 [Source:NCBI gene;Acc:339685]               |             |             |            |             |             |       | 2 |
| 3                                    | 0                                                     | 30          | 13          | 8          | 0.025063399 |             |       |   |
| 0.030308921                          | 0                                                     | 0.332382178 | 0.129812708 |            | 0.085575862 |             |       |   |
| ENSG00000228748                      | 11.56961676                                           |             | 6.488657986 |            | 18.57816991 |             | 0     |   |
| 0                                    | 1.962431039                                           |             | 12.21214822 |            | 0.65414368  |             |       |   |
| 4.234023162                          | 0.015005305                                           |             | 1           | AL450306.1 | 10          |             |       |   |
| 77782866                             | 77793176                                              |             | +           | 3532       | antisense   |             | novel |   |
| transcript                           | -                                                     | 10          | 7           | 19         | 0           | 0           | 2     |   |
| 0.15483674                           | 0.087379852                                           |             | 0.249192726 |            | 0           |             | 0     |   |
| 0.026433541                          |                                                       |             |             |            |             |             |       |   |
| ENSG0000090857                       | 1276.128728                                           |             | 1238.406724 |            | 1340.561629 |             |       |   |
| 1812.259113                          | 1445.726326                                           |             | 1708.296219 |            | 1285.03236  |             |       |   |
| 1655.427219                          | -0.365219702                                          |             | 0.015010676 |            | 0.081632234 |             | PDPR  |   |
| 16                                   | 70113626                                              |             | 70162537    |            | +           | 10385       |       |   |
| protein_coding                       | pyruvate dehydrogenase phosphatase regulatory subunit |             |             |            |             |             |       |   |
| [Source:HGNC Symbol;Acc:HGNC:30264]  | -                                                     |             | 1103        | 1336       |             |             | 1371  |   |
| 1804                                 | 1582                                                  | 1741        | 5.808496397 |            | 5.671969871 |             |       |   |
| 6.115520266                          | 8.399070929                                           |             | 6.638325997 |            | 7.825972295 |             |       |   |
| ENSG00000173988                      | 21.98227184                                           |             | 56.54401959 |            | 22.48936357 |             |       |   |
| 2.009156444                          | 12.79403828                                           |             | 7.849724156 |            | 33.671885   |             |       |   |
| 7.550972961                          | 2.152865956                                           |             | 0.015059742 |            | 0.081869944 |             | LRR63 |   |

|                        |                                                 |              |              |            |       |
|------------------------|-------------------------------------------------|--------------|--------------|------------|-------|
| 13                     | 46211943                                        | 46277366     | +            | 2677       |       |
| protein_coding         | leucine rich repeat containing                  | 63           | [Source:HGNC |            |       |
| Symbol;Acc:HGNC:34296] | -                                               | 19           | 61           | 23         | 2     |
| 8                      | 0.388150315                                     | 1.004651465  | 0.397998945  |            | 14    |
| 0.036122919            | 0.227896818                                     | 0.139504318  |              |            |       |
| ENSG00000180185        | 882.7617586                                     | 862.9915121  | 778.3275393  |            |       |
| 952.3401545            | 1333.321561                                     | 1103.867459  | 841.36027    |            |       |
| 1129.843058            | -0.425824549                                    | 0.015087754  | 0.081967878  |            | FAHD1 |
| 16                     | 1826941                                         | 1840207      | +            | 3039       |       |
| protein_coding         | fumarylacetoacetate hydrolase domain containing | 1            | [Source:HGNC |            |       |
| Symbol;Acc:HGNC:14169] | -                                               | 763          | 931          | 796        | 948   |
| 1125                   | 13.7305695                                      | 13.50681461  | 12.13346449  |            | 1459  |
| 15.0826917             | 20.92103613                                     | 17.28095973  |              |            |       |
| ENSG00000171408        | 127.2657843                                     | 104.7454789  | 141.7807703  |            |       |
| 78.35710132            | 57.57317228                                     | 62.79779325  | 124.5973445  |            |       |
| 66.24268895            | 0.911877707                                     | 0.015088481  | 0.081967878  |            | PDE7B |
| 6                      | 135851696                                       | 136195574    | +            | 5946       |       |
| protein_coding         | phosphodiesterase 7B                            | [Source:HGNC |              |            |       |
| Symbol;Acc:HGNC:8792]  | -                                               | 110          | 113          | 145        | 78    |
| 64                     | 1.011725026                                     | 0.837890944  | 1.129654283  |            | 63    |
| 0.634265245            | 0.461715275                                     | 0.50245955   |              |            |       |
| ENSG00000086717        | 46.27846703                                     | 16.68512054  | 48.88992081  |            |       |
| 17.07782977            | 6.397019142                                     | 3.924862078  | 37.28450279  |            |       |
| 9.133236998            | 2.031327303                                     | 0.015094563  | 0.081971786  |            | PPEF1 |
| X                      | 18675909                                        | 18827921     | +            | 3513       |       |
| protein_coding         | protein phosphatase with EF-hand domain 1       | [Source:HGNC |              |            |       |
| Symbol;Acc:HGNC:9243]  | -                                               | 40           | 18           | 50         | 17    |
| 4                      | 0.622696686                                     | 0.225906285  | 0.659317055  |            | 7     |
| 0.233976364            | 0.086831737                                     | 0.053153012  |              |            |       |
| ENSG00000164111        | 12984.58089                                     | 9827.535995  | 10394.97496  |            |       |
| 8035.621198            | 8378.267356                                     | 9716.977289  | 11069.03061  |            |       |
| 8710.288614            | 0.345629783                                     | 0.015109393  | 0.081998999  |            | ANXA5 |
| 4                      | 121667955                                       | 121697113    | -            | 3034       |       |
| protein_coding         | annexin A5                                      | [Source:HGNC |              |            |       |
| Symbol;Acc:HGNC:543]   | -                                               | 11223        | 10602        | 10631      | 7999  |
| 11223                  | 10602                                           | 10631        | 7999         | 9168       | 9903  |
| 154.065778             | 162.3158751                                     | 127.4739187  | 131.6793354  |            |       |
| 152.3692179            |                                                 |              |              |            |       |
| ENSG00000232059        | 0                                               | 0            | 1.955596832  | 18.082408  |       |
| 10.96631853            | 7.849724156                                     | 0.651865611  |              |            |       |
| 12.29948356            | -4.208632448                                    | 0.015109439  | 1            | AL451007.1 |       |
| 1                      | 244694432                                       | 244694720    | -            | 289        |       |
| processed_pseudogene   | ribosomal protein L37 (RPL37)                   | pseudogene   |              |            |       |
| -                      | 0                                               | 0            | 2            | 18         | 12    |
| 0                      | 0.32057866                                      | 3.011451539  | 1.809430894  |            | 0     |
| 1.292225123            |                                                 |              |              |            |       |
| ENSG00000160785        | 1411.493244                                     | 1412.673539  | 1580.122241  |            |       |
| 2130.710409            | 1893.517666                                     | 1657.273012  | 1468.096341  |            |       |
| 1893.833696            | -0.367219735                                    | 0.015110367  | 0.081998999  |            |       |
| SLC25A44               | 1                                               | 156193932    | 156212796    | +          | 7293  |
| protein_coding         | solute carrier family 25 member 44              |              |              |            |       |

|                                     |                                                      |             |             |        |
|-------------------------------------|------------------------------------------------------|-------------|-------------|--------|
| [Source:HGNC Symbol;Acc:HGNC:29036] | -                                                    | 1220        | 1524        | 1616   |
| 2121                                | 2072 1689                                            | 9.148467084 | 9.213246936 |        |
| 10.26449526                         | 14.06163017                                          | 12.38061263 | 10.81108973 |        |
| ENSG00000100519                     | 2272.272731                                          | 1987.383246 | 1922.351686 |        |
| 1520.931428                         | 1646.775499                                          | 1703.390142 | 2060.669221 |        |
| 1623.699023                         | 0.343450836                                          | 0.015115666 | 0.081998999 | PSMC6  |
| 14                                  | 52707172                                             | 52728587    | + 7482      |        |
| protein_coding                      | "proteasome 26S subunit, ATPase 6 [Source:HGNC       |             |             |        |
| Symbol;Acc:HGNC:9553]"              | -                                                    | 1964 2144   | 1966 1514   | 1802   |
| 1736                                | 14.35550558                                          | 12.63400473 | 12.17217718 |        |
| 9.783841035                         | 10.4953199                                           | 10.83123685 |             |        |
| ENSG00000088543                     | 200.1543699                                          | 158.5086451 | 151.5587545 |        |
| 233.0621475                         | 286.9520015                                          | 277.683992  | 170.0739232 |        |
| 265.8993803                         | -0.646904359                                         | 0.015152623 | 0.082170327 |        |
| C3orf18 3                           | 50558025                                             | 50571027    | - 3248      |        |
| protein_coding                      | chromosome 3 open reading frame 18 [Source:HGNC      |             |             |        |
| Symbol;Acc:HGNC:24837]"             | -                                                    | 173 171     | 155 232     | 314    |
| 283                                 | 2.912894767                                          | 2.321207942 | 2.210640557 |        |
| 3.453609107                         | 4.21281342                                           | 4.06739594  |             |        |
| ENSG00000131759                     | 1136.136366                                          | 1233.771968 | 1209.536641 |        |
| 1428.510232                         | 1522.490556                                          | 1603.306159 | 1193.148325 |        |
| 1518.102315                         | -0.347251277                                         | 0.015169854 | 0.082234593 | RARA   |
| 17                                  | 40309192                                             | 40357643    | + 4731      |        |
| protein_coding                      | retinoic acid receptor alpha [Source:HGNC            |             |             |        |
| Symbol;Acc:HGNC:9864]"              | THR-like                                             | 982         | 1331 1237   | 1422   |
| 1666                                | 1634 11.35149997                                     | 12.40392311 | 12.1120933  |        |
| 14.53275208                         | 15.34548598                                          | 16.12297349 |             |        |
| ENSG00000163072                     | 91.39997238                                          | 38.93194792 | 110.491221  |        |
| 26.11903377                         | 42.03755436                                          | 28.45525006 | 80.27438044 |        |
| 32.20394607                         | 1.314488302                                          | 0.015175409 | 0.082235547 |        |
| NOSTRIN 2                           | 168786539                                            | 168865514   | + 5248      |        |
| protein_coding                      | nitric oxide synthase trafficking [Source:HGNC       |             |             |        |
| Symbol;Acc:HGNC:20203]"             | -                                                    | 79 42       | 113 26      | 46     |
| 29                                  | 0.823242869                                          | 0.352849431 | 0.997440671 |        |
| 0.239541485                         | 0.38196415                                           | 0.257958716 |             |        |
| ENSG00000169083                     | 310.0657291                                          | 420.8358179 | 599.3904291 |        |
| 294.3414191                         | 283.296562                                           | 283.5712851 | 443.4306587 |        |
| 287.0697554                         | 0.628514898                                          | 0.015191935 | 0.082295928 | AR     |
| X                                   | 67544032                                             | 67730619    | + 12775     |        |
| protein_coding                      | androgen receptor [Source:HGNC Symbol;Acc:HGNC:644]" |             |             |        |
| ESR-like                            | 268 454 613                                          | 293 310     | 289         |        |
| 1.147277821                         | 1.56685534                                           | 2.22280836  | 1.108939691 |        |
| 1.057448883                         | 1.056046326                                          |             |             |        |
| ENSG00000154240                     | 285.7695339                                          | 276.23144   | 317.7844853 |        |
| 147.6729986                         | 223.89567                                            | 193.2994573 | 293.2618197 |        |
| 188.2893753                         | 0.638393378                                          | 0.015204551 | 0.082335093 | CEP112 |
| 17                                  | 65635538                                             | 66192084    | - 7849      |        |
| protein_coding                      | centrosomal protein 112 [Source:HGNC                 |             |             |        |
| Symbol;Acc:HGNC:28514]"             | -                                                    | 247 298     | 325 147     | 245    |
| 197                                 | 1.720985998                                          | 1.673924604 | 1.91810107  |        |

|                        |                                               |                |                        |             |          |
|------------------------|-----------------------------------------------|----------------|------------------------|-------------|----------|
| 0.905532876            | 1.360223748                                   | 1.171650097    |                        |             |          |
| ENSG00000260454        | 18.51138681                                   | 10.19646255    | 18.57816991            |             |          |
| 75.34336665            | 41.12369448                                   | 29.43646558    | 15.76200642            |             |          |
| 48.63450891            | -1.629105188                                  | 0.015213946    | 0.082356798            |             |          |
| AL355607.2             | 9                                             | 90997054       | 91001871               | +           | 1395     |
| lincRNA                | novel transcript                              | -              | 16                     | 11          | 19       |
| 75                     | 45                                            | 30             | 0.627249737            | 0.347658167 |          |
| 0.630930975            | 2.599490725                                   | 1.405713786    | 1.003906076            |             |          |
| ENSG00000148672        | 4290.013894                                   | 3734.686146    | 3559.186235            |             |          |
| 2524.505072            | 3385.850846                                   | 3102.603473    | 3861.295425            |             |          |
| 3004.319797            | 0.361756143                                   | 0.015252094    | 0.082534076            |             | GLUD1    |
| 10                     | 87050486                                      | 87094866       | -                      | 3519        |          |
| protein_coding         | glutamate dehydrogenase 1 [Source:HGNC        |                |                        |             |          |
| Symbol;Acc:HGNC:4335]  | -                                             | 3708           | 4029                   | 3640        | 2513     |
| 3162                   | 57.62556166                                   | 50.4791413     | 47.91644313            |             | 3705     |
| 34.52823972            | 45.88043673                                   | 41.94581476    |                        |             |          |
| ENSG00000172893        | 2192.442375                                   | 3007.956452    | 4200.621996            |             |          |
| 2232.172809            | 2159.45089                                    | 2386.316143    | 3133.673608            |             |          |
| 2259.313281            | 0.472282361                                   | 0.015264684    | 0.082572971            |             | DHCR7    |
| 11                     | 71428193                                      | 71452868       | -                      | 4160        |          |
| protein_coding         | 7-dehydrocholesterol reductase [Source:HGNC   |                |                        |             |          |
| Symbol;Acc:HGNC:2860]  | -                                             | 1895           | 3245                   | 4296        | 2222     |
| 2432                   | 24.91211479                                   | 34.39183341    | 47.83804223            |             | 2363     |
| 25.82569041            | 24.75306537                                   | 27.29080057    |                        |             |          |
| ENSG00000066739        | 1361.743892                                   | 1137.36905     | 1020.821546            |             |          |
| 1003.573644            | 736.5710612                                   | 852.6762864    | 1173.311496            |             |          |
| 864.2736638            | 0.440821338                                   | 0.01527998     | 0.082626478            |             | ATG2B    |
| 14                     | 96279202                                      | 96363870       | -                      | 14778       |          |
| protein_coding         | autophagy related 2B [Source:HGNC             |                |                        |             |          |
| Symbol;Acc:HGNC:20187] | -                                             | 1177           | 1227                   | 1044        | 999      |
| 869                    | 4.355675462                                   | 3.660689204    | 3.272557547            |             | 806      |
| 3.268519215            | 2.376719762                                   | 2.745049309    |                        |             |          |
| ENSG00000171872        | 9.255693406                                   | 10.19646255    | 2.933395248            |             | 0        |
| 0                      | 0                                             | 7.461850401    | 0                      | 5.391846914 |          |
| 0.015306654            | 1                                             | KLF17          | 1                      | 44118850    | 44135140 |
| +                      | 3131                                          | protein_coding | Kruppel like factor 17 |             |          |
| [Source:HGNC           | Symbol;Acc:HGNC:18830]                        | zf-C2H2        | 8                      | 11          | 3        |
| 0                      | 0                                             | 0              | 0.139733852            | 0.154897203 |          |
| 0.044385452            | 0                                             | 0              | 0                      |             |          |
| ENSG00000223478        | 17.35442514                                   | 18.53902282    | 22.48936357            |             |          |
| 5.02289111             | 0                                             | 2.943646558    | 19.46093717            | 2.655512556 |          |
| 2.887801488            | 0.015307662                                   | 1              | AL441992.1             | 9           |          |
| 128724445              | 128733194                                     | +              | 544                    | antisense   |          |
| uncharacterized        | LOC100506100 [Source:NCBI gene;Acc:100506100] |                |                        |             |          |
| -                      | 15                                            | 20             | 23                     | 5           | 0        |
| 1.507950453            | 1.620932962                                   | 1.958535249    | 0.444398231            |             | 0        |
| 0.257435474            |                                               |                |                        |             |          |
| ENSG00000104979        | 1198.612296                                   | 1841.851917    | 1820.660651            |             |          |
| 2298.474972            | 1902.656265                                   | 2401.034376    | 1620.374955            |             |          |
| 2200.721871            | -0.440892565                                  | 0.015325172    | 0.082841551            |             |          |

|                                                |                                      |                                     |              |           |        |
|------------------------------------------------|--------------------------------------|-------------------------------------|--------------|-----------|--------|
| C19orf53                                       | 19                                   | 13774168                            | 13778462     | +         | 1174   |
| protein_coding                                 | chromosome 19 open reading frame 53  |                                     |              |           |        |
| [Source:HGNC Symbol;Acc:HGNC:24991]            |                                      |                                     | -            | 1036 1987 | 1862   |
| 2288                                           | 2082 2447                            | 48.25989484                         | 74.62145763  |           |        |
| 73.47067596                                    | 94.22998884                          | 77.28073181                         | 97.29979119  |           |        |
| ENSG00000167552                                | 9283.460486                          | 6803.821374                         | 6901.301221  |           |        |
| 8442.475378                                    | 11544.79183                          | 10039.7972                          | 7662.861027  |           |        |
| 10009.02147                                    | -0.385532851                         | 0.015338938                         | 0.082886652  |           | TUBA1A |
| 12                                             | 49184796                             | 49189324                            | - 3421       |           |        |
| protein_coding                                 | tubulin alpha 1a                     | [Source:HGNC Symbol;Acc:HGNC:20766] |              |           |        |
| -                                              | 8024 7340                            | 7058 8404                           | 12633 10232  |           |        |
| 128.2722045                                    | 94.59690853                          | 95.57207949                         | 118.7775016  |           |        |
| 160.9207395                                    | 139.6218837                          |                                     |              |           |        |
| ENSG00000224080                                | 33.5518886                           | 16.68512054                         | 9.777984162  |           |        |
| 94.43035287                                    | 31.98509571                          | 54.94806909                         | 20.00499776  |           |        |
| 60.45450589                                    | -1.603627258                         | 0.015389528                         | 0.083130643  |           |        |
| UBE2FP1 3                                      | 37143512                             | 37143958                            | - 447        |           |        |
| processed_pseudogene                           | UBE2F pseudogene 1                   | [Source:HGNC                        |              |           |        |
| Symbol;Acc:HGNC:44535]                         | -                                    | 29 18                               | 10 94        |           | 35     |
| 56                                             | 3.548012878                          | 1.775411137                         | 1.036322513  |           |        |
| 10.16767245                                    | 3.412079323                          | 5.848258217                         |              |           |        |
| ENSG00000197714                                | 146.9341328                          | 186.3171793                         | 228.8048294  |           |        |
| 409.8679146                                    | 332.6449954                          | 201.1491815                         | 187.3520472  |           |        |
| 314.5540305                                    | -0.746079623                         | 0.015395788                         | 0.083131216  |           | ZNF460 |
| 19                                             | 57280051                             | 57293569                            | + 3505       |           |        |
| protein_coding                                 | zinc finger protein 460              | [Source:HGNC                        |              |           |        |
| Symbol;Acc:HGNC:21628]                         | zf-C2H2                              | 127 201                             | 234 408      |           | 364    |
| 205                                            | 1.98157453                           | 2.528377944                         | 3.092646567  |           |        |
| 5.628249705                                    | 4.525556165                          | 2.730309465                         |              |           |        |
| ENSG00000116521                                | 3612.034352                          | 4344.619997                         | 4334.580379  |           |        |
| 4603.981992                                    | 5297.645709                          | 5573.304151                         | 4097.078243  |           |        |
| 5158.310617                                    | -0.332123485                         | 0.01540051                          | 0.083131216  |           | SCAMP3 |
| 1                                              | 155255979                            | 155262430                           | - 2442       |           |        |
| protein_coding                                 | secretory carrier membrane protein 3 | [Source:HGNC                        |              |           |        |
| Symbol;Acc:HGNC:10565]                         | -                                    | 3122 4687                           | 4433 4583    |           | 5797   |
| 5680                                           | 69.91686582                          | 84.62199346                         | 84.09197015  |           |        |
| 90.74138718                                    | 103.4466041                          | 108.5797186                         |              |           |        |
| ENSG00000116815                                | 893.1744137                          | 609.9338507                         | 557.3450972  |           |        |
| 377.7214115                                    | 493.4843338                          | 530.837596                          | 686.8177872  |           |        |
| 467.3477804                                    | 0.554095214                          | 0.015410938                         | 0.083158138  |           | CD58   |
| 1                                              | 116514535                            | 116571039                           | - 1783       |           |        |
| protein_coding                                 | CD58 molecule                        | [Source:HGNC Symbol;Acc:HGNC:1688]  |              |           |        |
| -                                              | 772 658                              | 570 376                             | 540 541      |           |        |
| 23.67885346                                    | 16.27078508                          | 14.80900802                         | 10.19618527  |           |        |
| 13.19778394                                    | 14.16419698                          |                                     |              |           |        |
| ENSG00000227120                                | 0 0                                  | 0 6.027469332                       | 15.53561792  |           |        |
| 1.962431039                                    | 0                                    | 7.841839429                         | -5.392678805 |           |        |
| 0.015422672                                    | 1 AC009238.1                         | 2                                   | 95436133     |           |        |
| 95436556                                       | + 424                                | processed_pseudogene                | pseudogene   |           |        |
| similar to part of Cdon homolog (mouse) (CDON) | -                                    | 0                                   | 0            |           |        |

|                                     |                                                                                                      |             |             |             |                |             |
|-------------------------------------|------------------------------------------------------------------------------------------------------|-------------|-------------|-------------|----------------|-------------|
| 0                                   | 6                                                                                                    | 17          | 2           | 0           | 0              | 0           |
| 0.684205578                         | 1.747196144                                                                                          | 0.22019638  |             |             |                |             |
| ENSG00000113732                     | 1609.333691                                                                                          | 1197.620874 |             | 1021.799345 |                |             |
| 1752.988997                         | 1864.27415                                                                                           | 1567.9824   |             | 1276.251303 |                |             |
| 1728.415182                         | -0.438387117                                                                                         | 0.01543582  |             | 0.083263014 |                |             |
| ATP6V0E1                            | 5                                                                                                    | 172983757   |             | 173035445   | +              | 1623        |
| protein_coding                      | ATPase H+ transporting V0 subunit e1                                                                 |             |             |             |                |             |
| [Source:HGNC Symbol;Acc:HGNC:863]   |                                                                                                      | -           |             | 1391        | 1292           | 1045        |
| 1745                                | 2040                                                                                                 | 1598        | 46.87090325 | 35.09764297 |                |             |
| 29.82635801                         | 51.98500953                                                                                          | 54.77346876 |             | 45.96256859 |                |             |
| ENSG00000272733                     | 3.470885027                                                                                          | 1.853902282 |             | 0           | 9.041203998    |             |
| 19.19105743                         | 20.60552591                                                                                          | 1.774929103 |             | 16.27926244 |                |             |
| -3.227324453                        | 0.015437114                                                                                          | 1           |             | AP000345.2  |                | 22          |
| 23580880                            | 23583859                                                                                             | -           |             | 1081        | lincRNA novel  |             |
| transcript                          | -                                                                                                    | 3           | 2           | 0           | 9              | 21          |
| 0.151771516                         | 0.081571465                                                                                          | 0           |             | 0.402548332 |                | 21          |
| 0.84654919                          | 0.906858727                                                                                          |             |             |             |                |             |
| ENSG00000134343                     | 17.35442514                                                                                          | 18.53902282 |             | 3.911193665 |                |             |
| 41.1877071                          | 63.05633154                                                                                          | 32.38011214 |             | 13.26821387 |                |             |
| 45.5413836                          | -1.782937704                                                                                         | 0.015441686 |             | 0.083265272 |                | AN03        |
| 11                                  | 26309599                                                                                             | 26663288    |             | +           | 7700           |             |
| protein_coding                      | anoctamin 3 [Source:HGNC Symbol;Acc:HGNC:14004] -                                                    |             |             |             |                |             |
| 15                                  | 20                                                                                                   | 4           | 41          | 69          | 33             | 0.10653572  |
| 0.114517861                         | 0.024064216                                                                                          | 0.257450861 |             | 0.390496336 |                |             |
| 0.20006414                          |                                                                                                      |             |             |             |                |             |
| ENSG00000126698                     | 4198.613921                                                                                          | 3887.633085 |             | 3960.083585 |                |             |
| 3238.760188                         | 3519.274388                                                                                          | 2950.515067 |             | 4015.44353  |                |             |
| 3236.183214                         | 0.311094192                                                                                          | 0.01551686  |             | 0.083641129 |                | DNAJC8      |
| 1                                   | 28199456                                                                                             | 28233025    |             | -           | 2888           |             |
| protein_coding                      | DnaJ heat shock protein family (Hsp40) member C8                                                     |             |             |             |                |             |
| [Source:HGNC Symbol;Acc:HGNC:15470] |                                                                                                      | -           |             | 3629        | 4194           | 4050        |
| 3224                                | 3851                                                                                                 | 3007        | 68.72021223 | 64.02730103 |                |             |
| 64.96213506                         | 53.97579662                                                                                          | 58.10786615 |             | 48.60514858 |                |             |
| ENSG00000100099                     | 1217.123683                                                                                          | 1287.535135 |             | 1310.249878 |                |             |
| 1683.6731                           | 1694.296213                                                                                          | 1475.748141 |             | 1271.636232 |                |             |
| 1617.905818                         | -0.34727731                                                                                          | 0.015536371 |             | 0.083696744 |                | HPS4        |
| 22                                  | 26443423                                                                                             | 26483837    |             | -           | 10782          |             |
| protein_coding                      | "HPS4, biogenesis of lysosomal organelles complex 3 subunit 2 [Source:HGNC Symbol;Acc:HGNC:15844]" - |             |             |             |                |             |
| 1340                                | 1676                                                                                                 | 1854        | 1504        | 5.335942304 | 5.679850127    |             |
| 5.75715506                          | 7.515811916                                                                                          | 7.493228911 |             | 6.511702408 |                |             |
| ENSG00000109519                     | 990.3591944                                                                                          | 1027.061864 |             | 978.7762146 |                |             |
| 1176.361098                         | 1281.231548                                                                                          | 1405.100624 |             | 998.7324243 |                |             |
| 1287.564423                         | -0.366427738                                                                                         | 0.015538128 |             | 0.083696744 |                | GRPEL1      |
| 4                                   | 7058906                                                                                              | 7068197     | -           | 4177        | protein_coding | "GrpE       |
| like 1, mitochondrial               | [Source:HGNC Symbol;Acc:HGNC:19696]" -                                                               |             |             |             |                |             |
| 856                                 | 1108                                                                                                 | 1001        | 1171        | 1402        | 1432           | 11.20737754 |
| 11.69524282                         | 11.10125447                                                                                          | 13.5548163  |             | 14.62655795 |                |             |
| 16.00385392                         |                                                                                                      |             |             |             |                |             |
| ENSG00000099331                     | 4240.264541                                                                                          | 4178.695743 |             | 4942.770994 |                |             |

|                                                                |                                                                                        |             |             |                |      |
|----------------------------------------------------------------|----------------------------------------------------------------------------------------|-------------|-------------|----------------|------|
| 5503.0795                                                      | 5323.233786                                                                            | 5674.369349 | 4453.910426 |                |      |
| 5500.227545                                                    | -0.304350836                                                                           | 0.015553444 | 0.083749738 | MY09B          |      |
| 19                                                             | 17075781                                                                               | 17214537    | + 9948      |                |      |
| protein_coding                                                 | myosin IXB [Source:HGNC Symbol;Acc:HGNC:7609]                                          |             |             | -              |      |
| 3665                                                           | 4508                                                                                   | 5055        | 5478        | 5825           | 5783 |
| 19.97938376                                                    | 23.5389908                                                                             | 26.62486828 | 20.14804514 | 25.51636176    |      |
| 27.13710103                                                    |                                                                                        |             |             |                |      |
| ENSG00000104774                                                | 536.8302175                                                                            | 624.7650689 | 840.9066379 |                |      |
| 368.6802075                                                    | 348.1806133                                                                            | 599.5226824 | 667.5006415 |                |      |
| 438.7945011                                                    | 0.605977469                                                                            | 0.015569557 | 0.083806977 | MAN2B1         |      |
| 19                                                             | 12646511                                                                               | 12666742    | - 5374      |                |      |
| protein_coding                                                 | mannosidase alpha class 2B member 1 [Source:HGNC Symbol;Acc:HGNC:6826]                 |             |             | -              |      |
| 611                                                            | 4.721880927                                                                            | 5.529631525 | 7.413157802 | 381            |      |
| 3.301943355                                                    | 3.089483722                                                                            | 5.307494881 |             |                |      |
| ENSG00000152684                                                | 880.4478352                                                                            | 803.6666391 | 612.1018085 |                |      |
| 959.372202                                                     | 1152.377305                                                                            | 1013.595632 | 765.4054276 |                |      |
| 1041.781713                                                    | -0.445545875                                                                           | 0.015609969 | 0.083994932 | PELO           |      |
| 5                                                              | 52787940                                                                               | 52804046    | + 4349      |                |      |
| protein_coding                                                 | pelota mRNA surveillance and ribosome rescue factor [Source:HGNC Symbol;Acc:HGNC:8829] |             |             | -              |      |
| 955                                                            | 1261                                                                                   | 1033        | 9.569515756 | 8.789489421    | 626  |
| 6.667873951                                                    | 10.61732669                                                                            | 12.63526273 | 11.08809529 |                |      |
| ENSG00000175054                                                | 1896.260186                                                                            | 1657.38864  | 1686.702268 |                |      |
| 1507.871911                                                    | 1221.830656                                                                            | 1347.208908 | 1746.783698 |                |      |
| 1358.970492                                                    | 0.362084948                                                                            | 0.015675806 | 0.084319512 | ATR            |      |
| 3                                                              | 142449235                                                                              | 142578826   | - 12496     |                |      |
| protein_coding                                                 | ATR serine/threonine kinase [Source:HGNC Symbol;Acc:HGNC:882]                          |             |             | -              |      |
| 1373                                                           | 7.173030043                                                                            | 6.308563166 | 6.394705357 | 1337           |      |
| 5.807789834                                                    | 4.662501542                                                                            | 5.129151848 |             |                |      |
| ENSG00000262406                                                | 0                                                                                      | 0           | 1.955596832 | 12.05493866    |      |
| 5.483159264                                                    | 19.62431039                                                                            | 0.651865611 |             |                |      |
| 12.38746944                                                    | -4.21874501                                                                            | 0.015700848 | 1           | MMP12          | 11   |
| 102862736                                                      | 102875034                                                                              | -           | 1874        | protein_coding |      |
| matrix metalloproteinase 12 [Source:HGNC Symbol;Acc:HGNC:7158] |                                                                                        |             |             |                |      |
| -                                                              | 0                                                                                      | 0           | 2           | 12             | 6    |
| 0                                                              | 0.049438224                                                                            | 0.3096085   | 0.139521219 | 20             | 0    |
| 0.498203122                                                    |                                                                                        |             |             |                |      |
| ENSG00000112739                                                | 5429.621144                                                                            | 5313.283939 | 5143.219669 |                |      |
| 4520.601999                                                    | 3993.567664                                                                            | 4461.586967 | 5295.374917 |                |      |
| 4325.25221                                                     | 0.2919764                                                                              | 0.015754138 | 0.084674487 | PRPF4B         |      |
| 6                                                              | 4021267                                                                                | 4064983     | + 7859      | protein_coding | pre- |
| mRNA processing factor 4B [Source:HGNC Symbol;Acc:HGNC:17346]  |                                                                                        |             |             |                |      |
| 4693                                                           | 5732                                                                                   | 5260        | 4500        | 4370           | 4547 |
| 32.15680195                                                    | 31.00422723                                                                            | 27.68512199 | 32.65712723 | 24.23107858    |      |
| 27.00870126                                                    |                                                                                        |             |             |                |      |
| ENSG00000119927                                                | 948.7085741                                                                            | 751.7573752 | 876.1073809 |                |      |
| 664.0262048                                                    | 666.2038506                                                                            | 591.6729582 | 858.8577767 |                |      |
| 640.6343379                                                    | 0.42221437                                                                             | 0.015759804 | 0.084674487 | GPAM           |      |



|                 |                                                                                           |             |             |             |                  |
|-----------------|-------------------------------------------------------------------------------------------|-------------|-------------|-------------|------------------|
| 10              | 112149864                                                                                 | 112215377   | -           | 9808        |                  |
| protein_coding  | "glycerol-3-phosphate acyltransferase, mitochondrial [Source:HGNC Symbol;Acc:HGNC:24865]" |             |             |             |                  |
|                 |                                                                                           |             | -           | 820         | 811 896          |
| 661             | 729                                                                                       | 603         | 4.572230411 | 3.645644821 |                  |
| 4.231847494     | 3.258533715                                                                               | 3.238960628 | 2.870006569 |             |                  |
| ENSG00000103512 | 1500.579293                                                                               | 1646.265226 | 2414.18429  |             |                  |
| 1447.597218     | 1209.950478                                                                               | 1408.04427  | 1853.67627  |             |                  |
| 1355.197322     | 0.452301196                                                                               | 0.015760741 | 0.084674487 |             | NOM01            |
| 16              | 14833681                                                                                  | 14896160    | +           | 5819        |                  |
| protein_coding  | NODAL modulator 1 [Source:HGNC Symbol;Acc:HGNC:30060]                                     |             |             |             |                  |
| -               | 1297                                                                                      | 1776        | 2469        | 1441        | 1324 1435        |
| 12.18951235     | 13.4563899                                                                                | 19.65509687 | 11.97338204 |             |                  |
| 9.915125729     | 11.51196816                                                                               |             |             |             |                  |
| ENSG00000013441 | 1187.042679                                                                               | 823.1326131 | 715.7484406 |             |                  |
| 637.907171      | 634.2187549                                                                               | 660.3580446 | 908.6412443 |             |                  |
| 644.1613235     | 0.495262192                                                                               | 0.015763956 | 0.084674487 |             | CLK1             |
| 2               | 200853009                                                                                 | 200864744   | -           | 5170        |                  |
| protein_coding  | CDC like kinase 1 [Source:HGNC Symbol;Acc:HGNC:2068]                                      |             |             |             |                  |
| -               | 1026                                                                                      | 888         | 732         | 635         | 694 673          |
| 10.85304317     | 7.572798144                                                                               | 6.558778944 | 5.938604441 |             |                  |
| 5.849618256     | 6.076738629                                                                               |             |             |             |                  |
| ENSG00000117758 | 2264.173999                                                                               | 1989.237148 | 1483.320197 |             |                  |
| 2407.973998     | 3126.314641                                                                               | 2244.039893 | 1912.243782 |             |                  |
| 2592.776177     | -0.439675508                                                                              | 0.01581731  | 0.084931232 |             | STX12            |
| 1               | 27773183                                                                                  | 27824452    | +           | 3846        |                  |
| protein_coding  | syntaxin 12 [Source:HGNC Symbol;Acc:HGNC:11430]                                           |             |             |             | -                |
| 1957            | 2146                                                                                      | 1517        | 2397        | 3421        | 2287 27.82763245 |
| 24.6010926      | 18.27169161                                                                               | 30.13422111 | 38.76166216 |             |                  |
| 27.75894271     |                                                                                           |             |             |             |                  |
| ENSG00000047634 | 686.0782737                                                                               | 564.5132448 | 576.9010655 |             |                  |
| 427.9503226     | 458.7576585                                                                               | 446.4530614 | 609.1641947 |             |                  |
| 444.3870141     | 0.454066968                                                                               | 0.015882213 | 0.085249786 |             | SCML1            |
| X               | 17737449                                                                                  | 17754988    | +           | 5497        |                  |
| protein_coding  | Scm polycomb group protein like 1 [Source:HGNC Symbol;Acc:HGNC:10580]                     |             |             |             | -                |
| 455             | 5.899614973                                                                               | 4.884560731 | 4.971972644 |             | 502              |
| 3.747011954     | 3.979573937                                                                               | 3.863951758 |             |             |                  |
| ENSG00000111358 | 1451.986903                                                                               | 1322.759278 | 1366.962186 |             |                  |
| 1000.559909     | 1143.238707                                                                               | 1093.074089 | 1380.569456 |             |                  |
| 1078.957568     | 0.35520913                                                                                | 0.015961541 | 0.085645519 |             | GTF2H3           |
| 12              | 123633739                                                                                 | 123662606   | +           | 3996        |                  |
| protein_coding  | general transcription factor IIH subunit 3 [Source:HGNC Symbol;Acc:HGNC:4657]             |             |             |             |                  |
| 996             | 1251                                                                                      | 1114        | -           | 1255        | 1427 1398        |
| 16.20631021     | 12.05133268                                                                               | 13.64238897 | 13.01384852 |             |                  |
| ENSG00000178965 | 42.807582                                                                                 | 52.83621503 | 15.64477466 |             |                  |
| 4.018312888     | 8.224738897                                                                               | 15.69944831 | 37.09619056 |             |                  |
| 9.314166699     | 1.99310199                                                                                | 0.0159674   | 0.085646891 |             | ERICH3           |
| 1               | 74568111                                                                                  | 74673738    | -           | 8779        |                  |
| protein_coding  | glutamate rich 3 [Source:HGNC Symbol;Acc:HGNC:25346]                                      |             |             |             |                  |

|                                     |                                                      |           |             |           |             |       |        |
|-------------------------------------|------------------------------------------------------|-----------|-------------|-----------|-------------|-------|--------|
| -                                   | 37                                                   | 57        | 16          | 4         | 9           | 16    |        |
| 0.230489628                         | 0.286262042                                          |           | 0.084426229 |           | 0.022030084 |       |        |
| 0.044674125                         | 0.085078724                                          |           |             |           |             |       |        |
| ENSG00000156011                     | 2805.632064                                          |           | 2041.146412 |           | 2372.138958 |       |        |
| 2110.618844                         | 1809.442557                                          |           | 1517.940409 |           | 2406.305811 |       |        |
| 1812.66727                          | 0.408394128                                          |           | 0.015992898 |           | 0.085725373 |       | PSD3   |
| 8                                   | 18527301                                             |           | 19084730    |           | -           | 15213 |        |
| protein_coding                      | pleckstrin and Sec7 domain containing 3 [Source:HGNC |           |             |           |             |       |        |
| Symbol;Acc:HGNC:19093]              | -                                                    |           | 2425        | 2202      | 2426        | 2101  | 1980   |
| 1547                                | 8.717492661                                          |           | 6.381700337 |           | 7.387174993 |       |        |
| 6.677477043                         | 5.671643473                                          |           | 4.747024621 |           |             |       |        |
| ENSG00000158615                     | 2634.401736                                          |           | 2547.261735 |           | 2353.560788 |       |        |
| 3357.300418                         | 3472.667534                                          |           | 2722.873067 |           | 2511.741419 |       |        |
| 3184.28034                          | -0.342434757                                         |           | 0.015993247 |           | 0.085725373 |       |        |
| PPP1R15B                            | 1                                                    | 204403387 |             | 204411791 | -           |       | 5227   |
| protein_coding                      | protein phosphatase 1 regulatory subunit 15B         |           |             |           |             |       |        |
| [Source:HGNC Symbol;Acc:HGNC:14951] | -                                                    |           |             |           | 2277        | 2748  | 2407   |
| 3342                                | 3800                                                 | 2775      | 23.82348231 |           | 23.17918631 |       |        |
| 21.33172842                         | 30.91399711                                          |           | 31.68032982 |           | 24.78315101 |       |        |
| ENSG00000101158                     | 3429.234407                                          |           | 3712.439319 |           | 3629.587721 |       |        |
| 2775.649627                         | 2933.490207                                          |           | 3052.561481 |           | 3590.420482 |       |        |
| 2920.567105                         | 0.298001224                                          |           | 0.016007813 |           | 0.085773373 |       | NELFCD |
| 20                                  | 58981208                                             |           | 58995133    |           | +           | 6298  |        |
| protein_coding                      | negative elongation factor complex member C/D        |           |             |           |             |       |        |
| [Source:HGNC Symbol;Acc:HGNC:15934] | -                                                    |           |             |           | 2964        | 4005  | 3712   |
| 2763                                | 3210                                                 | 3111      | 25.7377309  |           | 28.03714722 |       |        |
| 27.30283642                         | 21.21189385                                          |           | 22.21063493 |           | 23.05915511 |       |        |
| ENSG00000185122                     | 2555.728342                                          |           | 2865.205976 |           | 2830.726415 |       |        |
| 3515.019199                         | 3189.370972                                          |           | 3515.695206 |           | 2750.553578 |       |        |
| 3406.695126                         | -0.308372667                                         |           | 0.016043144 |           | 0.085932568 |       | HSF1   |
| 8                                   | 144291591                                            |           | 144314722   |           | +           | 5307  |        |
| protein_coding                      | heat shock transcription factor 1 [Source:HGNC       |           |             |           |             |       |        |
| Symbol;Acc:HGNC:5224]               | HSF                                                  |           | 2209        | 3091      | 2895        | 3499  | 3490   |
| 3583                                | 22.76362072                                          |           | 25.67934106 |           | 25.26980766 |       |        |
| 31.87836738                         | 28.65727802                                          |           | 31.51691906 |           |             |       |        |
| ENSG00000110841                     | 5493.254036                                          |           | 4025.748805 |           | 4325.780193 |       |        |
| 4040.413609                         | 3436.113139                                          |           | 3234.086352 |           | 4614.927678 |       |        |
| 3570.204367                         | 0.370096922                                          |           | 0.016065417 |           | 0.08599705  |       |        |
| PPFIBP1 12                          | 27523431                                             |           | 27695564    |           | +           | 11690 |        |
| protein_coding                      | PPFIA binding protein 1 [Source:HGNC                 |           |             |           |             |       |        |
| Symbol;Acc:HGNC:9249]               | -                                                    |           | 4748        | 4343      | 4424        | 4022  | 3760   |
| 3296                                | 22.21216607                                          |           | 16.3798257  |           | 17.5308536  |       |        |
| 16.63522853                         | 14.01625311                                          |           | 13.16190427 |           |             |       |        |
| ENSG00000271122                     | 923.2554172                                          |           | 891.7269975 |           | 885.885365  |       |        |
| 1240.654104                         | 1164.257484                                          |           | 1076.393425 |           | 900.2892599 |       |        |
| 1160.435004                         | -0.366330122                                         |           | 0.016066434 |           | 0.08599705  |       |        |
| AC018647.2                          | 7                                                    | 35695214  |             | 35699413  | +           |       | 4200   |
| antisense                           | uncharacterized LOC101930085 [Source:NCBI            |           |             |           |             |       |        |
| gene;Acc:101930085]                 | -                                                    |           | 798         | 962       | 906         | 1235  | 1274   |
| 1097                                | 10.39078392                                          |           | 10.09856673 |           | 9.992665805 |       |        |

|                        |                                                       |                                     |             |                |  |  |
|------------------------|-------------------------------------------------------|-------------------------------------|-------------|----------------|--|--|
| 14.21735749            | 13.2183953                                            | 12.19279784                         |             |                |  |  |
| ENSG00000186501        | 1239.105955                                           | 1497.026092                         | 1378.695767 |                |  |  |
| 1689.700569            | 1646.775499                                           | 1956.543746                         | 1371.609271 |                |  |  |
| 1764.339938            | -0.362733905                                          | 0.016081819                         | 0.086049269 |                |  |  |
| TMEM222 1              | 27322145                                              | 27336400                            | +           | 4476           |  |  |
| protein_coding         | transmembrane protein 222 [Source:HGNC                |                                     |             |                |  |  |
| Symbol;Acc:HGNC:25363] | -                                                     | 1071 1615                           | 1410 1682   | 1802           |  |  |
| 1994                   | 13.08561401                                           | 15.9080302                          | 14.5925601  |                |  |  |
| 18.16925542            | 17.54378541                                           | 20.7960624                          |             |                |  |  |
| ENSG00000133028        | 2699.191589                                           | 2493.498569                         | 2496.319356 |                |  |  |
| 3177.480916            | 3310.000476                                           | 3002.51949                          | 2563.003172 |                |  |  |
| 3163.333627            | -0.303827686                                          | 0.016095292                         | 0.086091226 | SC01           |  |  |
| 17                     | 10672474                                              | 10698375                            | -           | 10325          |  |  |
| protein_coding         | "SC01, cytochrome c oxidase assembly protein          |                                     |             |                |  |  |
| [Source:HGNC           | Symbol;Acc:HGNC:10603]"                               | -                                   | 2333 2690   | 2553           |  |  |
| 3163                   | 3622 3060                                             | 12.35718052                         | 11.48672378 |                |  |  |
| 11.45415907            | 14.81188556                                           | 15.28681407                         | 13.83494389 |                |  |  |
| ENSG00000108106        | 4089.859524                                           | 5768.416949                         | 6616.761882 |                |  |  |
| 4295.576477            | 4079.470493                                           | 4143.673139                         | 5491.679452 |                |  |  |
| 4172.906703            | 0.396423814                                           | 0.016101117                         | 0.086092262 | UBE2S          |  |  |
| 19                     | 55399745                                              | 55407777                            | -           | 2788           |  |  |
| protein_coding         | ubiquitin conjugating enzyme E2 S [Source:HGNC        |                                     |             |                |  |  |
| Symbol;Acc:HGNC:17895] | -                                                     | 3535 6223                           | 6767 4276   | 4464           |  |  |
| 4223                   | 69.34120132                                           | 98.4103983                          | 112.4361232 |                |  |  |
| 74.15597402            | 69.77342055                                           | 70.70894343                         |             |                |  |  |
| ENSG00000187624        | 47.4354287                                            | 42.63975248                         | 29.33395248 |                |  |  |
| 68.3113191             | 95.95528713                                           | 93.21547435                         | 39.80304456 |                |  |  |
| 85.82736019            | -1.111314331                                          | 0.016111509                         | 0.086117706 |                |  |  |
| C17orf97               | 17 410327                                             | 431062 +                            | 2710        | protein_coding |  |  |
|                        | chromosome 17 open reading frame 97 [Source:HGNC      |                                     |             |                |  |  |
| Symbol;Acc:HGNC:33800] | -                                                     | 41 46                               | 30 68       | 105            |  |  |
| 95                     | 0.827388116                                           | 0.748380562                         | 0.512807561 |                |  |  |
| 1.213223568            | 1.688412683                                           | 1.636440994                         |             |                |  |  |
| ENSG00000125266        | 349.4024261                                           | 426.3975248                         | 265.9611692 |                |  |  |
| 532.4264577            | 562.9376845                                           | 439.5845527                         | 347.2537067 |                |  |  |
| 511.649565             | -0.5589363                                            | 0.016134327                         | 0.086209527 | EFNB2          |  |  |
| 13                     | 106489731                                             | 106535662                           | -           | 5019           |  |  |
| protein_coding         | ephrin B2 [Source:HGNC                                |                                     |             |                |  |  |
| Symbol;Acc:HGNC:3227]  | -                                                     | 302 460 272 530 616 448             | 3.290670971 |                |  |  |
| 302                    | 460 272 530 616 448                                   | 4.040867349 2.510464961 5.105754049 | 5.348378253 |                |  |  |
| 4.040867349            | 2.510464961                                           | 5.105754049                         | 5.348378253 |                |  |  |
| 4.166840284            |                                                       |                                     |             |                |  |  |
| ENSG00000182359        | 98.34174244                                           | 78.79084697                         | 50.84551764 |                |  |  |
| 149.6821551            | 140.7344211                                           | 133.4453106                         | 75.99270235 |                |  |  |
| 141.2872956            | -0.897712821                                          | 0.016150446                         | 0.086265501 | KBTBD3         |  |  |
| 11                     | 106051098                                             | 106077765                           | -           | 5516           |  |  |
| protein_coding         | kelch repeat and BTB domain containing 3 [Source:HGNC |                                     |             |                |  |  |
| Symbol;Acc:HGNC:22934] | -                                                     | 85 85                               | 52 149      | 154            |  |  |
| 136                    | 0.842731798                                           | 0.679404824                         | 0.436698341 |                |  |  |
| 1.306060297            | 1.216620307                                           | 1.150961209                         |             |                |  |  |
| ENSG00000266852        | 9.255693406                                           | 5.561706845                         | 6.844588913 | 0              |  |  |

|                        |                           |                     |                       |              |                        |        |
|------------------------|---------------------------|---------------------|-----------------------|--------------|------------------------|--------|
| 0                      | 0                         | 7.220663055         | 0                     | 5.343463753  |                        |        |
| 0.016216683            | 1                         | MIR4482             | 10                    | 104268336    | 104268405              |        |
| -                      | 70                        | miRNA               | microRNA              | 4482         | [Source:HGNC           |        |
| Symbol;Acc:HGNC:41792] | -                         | 8                   | 6                     | 7            | 0                      | 0      |
| 0                      | 6.250095592               | 3.779089421         | 4.632361631           | 0            |                        |        |
| 0                      | 0                         |                     |                       |              |                        |        |
| ENSG00000183853        | 4464.715107               | 4932.30702          | 6453.469547           |              |                        |        |
| 4546.721033            | 3670.061268               | 3959.204621         | 5283.497225           |              |                        |        |
| 4058.662307            | 0.380672147               | 0.016219496         | 0.086604065           |              |                        |        |
| KIRREL1                | 1                         | 157993273           | 158100262             | +            | 7872                   |        |
| protein_coding         | kirre like nephrin family | adhesion molecule 1 |                       |              |                        |        |
| [Source:HGNC           | Symbol;Acc:HGNC:15734]    | -                   | 3859                  | 5321         | 6600                   |        |
| 4526                   | 4016                      | 4035                | 26.80923403           | 29.801775    |                        |        |
| 38.83839782            | 27.79909647               | 22.23142066         | 23.92789474           |              |                        |        |
| ENSG00000099804        | 932.5111106               | 1608.260229         | 1363.050992           |              |                        |        |
| 1554.082509            | 1843.255373               | 2015.416677         | 1301.274111           |              |                        |        |
| 1804.25152             | -0.470687372              | 0.016225712         | 0.086607002           |              |                        | CDC34  |
| 19                     | 531712                    | 542092              | +                     | 1942         | protein_coding         | cell   |
| division cycle         | 34                        | [Source:HGNC        | Symbol;Acc:HGNC:1734] | -            |                        | 806    |
| 1735                   | 1394                      | 1547                | 2017                  | 2054         | 22.69763088            |        |
| 39.38983953            | 33.25186464               | 38.51609991         | 45.26007511           |              |                        |        |
| 49.37387913            |                           |                     |                       |              |                        |        |
| ENSG00000198783        | 386.4251997               | 494.0649581         | 529.9667416           |              |                        |        |
| 608.7744025            | 629.6494555               | 728.0619154         | 470.1522998           |              |                        |        |
| 655.4952578            | -0.47821898               | 0.016282273         | 0.08687857            |              |                        | ZNF830 |
| 17                     | 34961530                  | 34963775            | +                     | 2246         |                        |        |
| protein_coding         | zinc finger protein       | 830                 | [Source:HGNC          |              |                        |        |
| Symbol;Acc:HGNC:28291] | -                         | 334                 | 533                   | 542          | 606                    | 689    |
| 742                    | 8.132637742               | 10.46288411         | 11.17871774           |              |                        |        |
| 13.04560092            | 13.3680502                | 15.4219819          |                       |              |                        |        |
| ENSG00000284490        | 0                         | 0                   | 0.977798416           | 15.06867333  |                        |        |
| 5.483159264            | 7.849724156               | 0.325932805         |                       |              |                        |        |
| 9.467185584            | -4.699787799              | 0.016286924         | 1                     | AC011471.4   |                        |        |
| 19                     | 6199405                   | 6205121             | +                     | 216          | unprocessed_pseudogene |        |
|                        | acyl-CoA synthetase       | bubblegum family    | member 2              | (ACSBG2)     |                        |        |
| pseudogene             | -                         | 0                   | 0                     | 1            | 15                     | 6      |
| 0                      | 0                         | 0.214461187         | 3.35767552            | 1.21047576   |                        |        |
| 1.728949354            |                           |                     |                       |              |                        |        |
| ENSG00000104427        | 698.8048521               | 420.8358179         | 419.4755205           |              |                        |        |
| 290.3231062            | 368.2855306               | 357.1624491         | 513.0387302           |              |                        |        |
| 338.5903619            | 0.597666978               | 0.016298688         | 0.086893622           |              |                        |        |
| ZC2HC1A                | 8                         | 78666047            | 78719765              | +            | 4181                   |        |
| protein_coding         | zinc finger               | C2HC-type           | containing 1A         | [Source:HGNC |                        |        |
| Symbol;Acc:HGNC:24277] | -                         | 604                 | 454                   | 429          | 289                    | 403    |
| 364                    | 7.900443723               | 4.78750944          | 4.753128773           |              |                        |        |
| 3.342095777            | 4.20033062                | 4.064126824         |                       |              |                        |        |
| ENSG00000121552        | 17.35442514               | 38.00499677         | 13.68917783           |              |                        |        |
| 78.35710132            | 46.60685375               | 62.79779325         | 23.01619991           |              |                        |        |
| 62.58724944            | -1.43659458               | 0.016300583         | 0.086893622           |              |                        | CSTA   |
| 3                      | 122325244                 | 122341972           | +                     | 1373         |                        |        |

|                 |                                                 |                        |                    |             |             |            |       |      |
|-----------------|-------------------------------------------------|------------------------|--------------------|-------------|-------------|------------|-------|------|
| protein_coding  | cystatin A [Source:HGNC                         | Symbol;Acc:HGNC:2481]  | -                  |             |             |            |       |      |
| 15              | 41                                              | 14                     | 78                 | 51          | 64          | 0.59746908 |       |      |
| 1.316580073     | 0.472345687                                     | 2.746788889            | 1.618669698        |             |             |            |       |      |
| 2.175982872     |                                                 |                        |                    |             |             |            |       |      |
| ENSG00000165501 | 474.354287                                      | 329.9946061            | 517.2553621        |             |             |            |       |      |
| 206.9431137     | 338.1281546                                     | 308.1016731            | 440.5347518        |             |             |            |       |      |
| 284.3909805     | 0.630145212                                     | 0.016302146            | 0.086893622        |             |             | LRR1       |       |      |
| 14              | 49598697                                        | 49614672               | +                  | 2359        |             |            |       |      |
| protein_coding  | leucine rich repeat protein 1 [Source:HGNC      | Symbol;Acc:HGNC:19742] | -                  | 410         | 356         | 529        | 206   | 370  |
| 314             | 9.504967332                                     | 6.653589683            | 10.38795805        |             |             |            |       |      |
| 4.222216475     | 6.8349034                                       | 6.213663681            |                    |             |             |            |       |      |
| ENSG00000278356 | 4.627846703                                     | 4.634755704            | 12.71137941        |             |             | 0          |       |      |
| 0               | 0                                               | 7.324660606            | 0                  | 5.366817295 |             |            |       |      |
| 0.016315998     | 1                                               | AC005911.1             | 12                 | 2885819     | 2886329     | +          |       |      |
| 456             | sense_intronic                                  | novel transcript       | -                  |             |             | 4          |       |      |
| 5               | 13                                              | 0                      | 0                  | 0           | 0.479722249 |            |       |      |
| 0.483436147     | 1.320629412                                     | 0                      | 0                  | 0           |             |            |       |      |
| ENSG00000167207 | 4.627846703                                     | 4.634755704            | 12.71137941        |             |             | 0          |       |      |
| 0               | 0                                               | 7.324660606            | 0                  | 5.366817295 |             |            |       |      |
| 0.016315998     | 1                                               | NOD2                   | 16                 | 50693588    | 50734041    |            |       |      |
| +               | 6873                                            | protein_coding         | nucleotide binding |             |             |            |       |      |
| oligomerization | domain containing 2 [Source:HGNC                | Symbol;Acc:HGNC:5331]  | -                  | 4           | 5           | 13         | 0     | 0    |
| 0               | 0.031827928                                     | 0.032074332            | 0.087619236        |             |             | 0          |       |      |
| 0               | 0                                               |                        |                    |             |             |            |       |      |
| ENSG00000128596 | 92.55693406                                     | 61.1787753             | 106.5800274        |             |             |            |       |      |
| 34.15565955     | 24.67421669                                     | 54.94806909            | 86.77191224        |             |             |            |       |      |
| 37.92598178     | 1.194631259                                     | 0.016332102            | 0.087022949        |             |             |            |       |      |
| CCDC136         | 7 128790757                                     | 128822132              | +                  | 6188        |             |            |       |      |
| protein_coding  | coiled-coil domain containing 136 [Source:HGNC  | Symbol;Acc:HGNC:22225] | -                  | 80          | 66          | 109        | 34    | 27   |
| 56              | 0.707024388                                     | 0.470248684            | 0.815978374        |             |             |            |       |      |
| 0.265662239     | 0.190139373                                     | 0.422458213            |                    |             |             |            |       |      |
| ENSG00000163877 | 926.7263022                                     | 908.412118             | 973.8872225        |             |             |            |       |      |
| 1237.64037      | 1231.883115                                     | 1131.341494            | 936.3418809        |             |             |            |       |      |
| 1200.288326     | -0.358290838                                    | 0.016350549            | 0.087090883        |             |             |            | SNIP1 |      |
| 1               | 37534449                                        | 37554344               | -                  | 5769        |             |            |       |      |
| protein_coding  | Smad nuclear interacting protein 1 [Source:HGNC | Symbol;Acc:HGNC:30587] | -                  | 801         | 980         | 996        | 1232  | 1348 |
| 1153            | 7.593232359                                     | 7.489615019            | 7.997629025        |             |             |            |       |      |
| 10.325507       | 10.18234836                                     | 9.329853066            |                    |             |             |            |       |      |
| ENSG00000177731 | 4696.107442                                     | 4400.237066            | 4971.127148        |             |             |            |       |      |
| 4230.278893     | 2996.546538                                     | 3758.05544             | 4689.157218        |             |             |            |       |      |
| 3661.626957     | 0.356952373                                     | 0.01635834             | 0.087102035        |             |             |            | FLII  |      |
| 17              | 18244836                                        | 18258916               | -                  | 6465        |             |            |       |      |
| protein_coding  | "FLII, actin remodeling protein [Source:HGNC    | Symbol;Acc:HGNC:3750]" | -                  | 4059        | 4747        | 5084       | 4211  | 3279 |
| 3830            | 34.33564696                                     | 32.37312771            | 36.42834731        |             |             |            |       |      |
| 31.49328249     | 22.10199545                                     | 27.6551667             |                    |             |             |            |       |      |

|                                     |                                                  |             |                |        |
|-------------------------------------|--------------------------------------------------|-------------|----------------|--------|
| ENSG00000165312                     | 236.0201818                                      | 342.044971  | 304.0953074    |        |
| 361.6481599                         | 478.8625758                                      | 467.0585873 | 294.0534867    |        |
| 435.856441                          | -0.566329086                                     | 0.016367123 | 0.087109621    | OTUD1  |
| 10                                  | 23439458                                         | 23442390    | + 2933         |        |
| protein_coding                      | OTU deubiquitinase 1 [Source:HGNC                |             |                |        |
| Symbol;Acc:HGNC:27346]              | -                                                | 204 369     | 311 360        | 524    |
| 476                                 | 3.803757461                                      | 5.546873494 | 4.911914311    |        |
| 5.934602761                         | 7.785344266                                      | 7.576016739 |                |        |
| ENSG00000078304                     | 2762.824482                                      | 2563.946856 | 2212.757816    |        |
| 1965.95958                          | 2153.967731                                      | 1785.812245 | 2513.176384    |        |
| 1968.579852                         | 0.352049228                                      | 0.016375543 | 0.087109621    |        |
| PPP2R5C 14                          | 101761798                                        | 101927989   | + 14289        |        |
| protein_coding                      | protein phosphatase 2 regulatory subunit B'gamma |             |                |        |
| [Source:HGNC Symbol;Acc:HGNC:9311]  | -                                                | 2388 2766   |                | 2263   |
| 1957                                | 2357 1820                                        | 9.13960021  | 8.53462213     |        |
| 7.33643668                          | 6.622015698                                      | 7.188136971 | 5.945872437    |        |
| ENSG00000130818                     | 325.1062309                                      | 310.5286322 | 335.3848567    |        |
| 552.5180221                         | 438.6527412                                      | 401.3171475 | 323.6732399    |        |
| 464.1626369                         | -0.519963375                                     | 0.016376859 | 0.087109621    | ZNF426 |
| 19                                  | 9523224 9538645                                  | - 7545      | protein_coding | zinc   |
| finger protein 426                  | [Source:HGNC Symbol;Acc:HGNC:20725] zf-C2H2 281  |             |                |        |
| 335                                 | 343 550                                          | 480 409     | 2.036769057    |        |
| 1.957580007                         | 2.105897998                                      | 3.524558001 | 2.772302337    |        |
| 2.530521897                         |                                                  |             |                |        |
| ENSG00000123178                     | 959.1212292                                      | 846.3063916 | 792.9945155    |        |
| 460.0968257                         | 621.4247166                                      | 760.4420276 | 866.1407121    |        |
| 613.9878566                         | 0.495853586                                      | 0.016438056 | 0.087369389    | SPRYD7 |
| 13                                  | 49912706                                         | 49936490    | - 3340         |        |
| protein_coding                      | SPRY domain containing 7 [Source:HGNC            |             |                |        |
| Symbol;Acc:HGNC:14297]              | -                                                | 829 913     | 811 458        | 680    |
| 775                                 | 13.57384159                                      | 12.05197629 | 11.24803977    |        |
| 6.630102273                         | 8.87199 10.83181594                              |             |                |        |
| ENSG00000147010                     | 2117.239867                                      | 1930.839226 | 1981.019591    |        |
| 1650.522019                         | 1562.70039                                       | 1617.043176 | 2009.699561    |        |
| 1610.088528                         | 0.319682585                                      | 0.016442614 | 0.087369389    |        |
| SH3KBP1 X                           | 19533975                                         | 19887601    | - 5780         |        |
| protein_coding                      | SH3 domain containing kinase binding protein 1   |             |                |        |
| [Source:HGNC Symbol;Acc:HGNC:13867] | -                                                | 1830 2083   |                | 2026   |
| 1643                                | 1710 1648                                        | 17.31481932 | 15.88895699    |        |
| 16.23730911                         | 13.74393022                                      | 12.89219512 | 13.30991876    |        |
| ENSG00000172461                     | 53.22023708                                      | 51.90926389 | 92.89084954    |        |
| 35.16023777                         | 25.58807657                                      | 17.66187935 | 66.0067835     |        |
| 26.13673123                         | 1.338074172                                      | 0.016442842 | 0.087369389    | FUT9   |
| 6                                   | 96015984                                         | 96215612    | + 13719        |        |
| protein_coding                      | fucosyltransferase 9 [Source:HGNC                |             |                |        |
| Symbol;Acc:HGNC:4020]               | -                                                | 46 56       | 95 35          | 28     |
| 18                                  | 0.183370761                                      | 0.179969756 | 0.320777283    |        |
| 0.123352173                         | 0.088939395                                      | 0.061248589 |                |        |
| ENSG00000154654                     | 263.7872621                                      | 188.1710816 | 263.0277739    |        |
| 187.8561275                         | 105.0938859                                      | 131.4828796 | 238.3287059    |        |

|                       |                   |                      |                        |             |
|-----------------------|-------------------|----------------------|------------------------|-------------|
| 141.477631            | 0.752692091       | 0.016460064          | 0.087430505            | NCAM2       |
| 21                    | 20998315          | 21543329             | + 8380                 |             |
| protein_coding        | neural cell       | adhesion molecule 2  | [Source:HGNC           |             |
| Symbol;Acc:HGNC:7657] | -                 | 228 203              | 269 187                | 115         |
| 134                   | 1.487940418       | 1.068036211          | 1.486999139            |             |
| 1.078943752           | 0.598015471       | 0.746460473          |                        |             |
| ENSG00000089597       | 6527.577774       | 7086.541472          | 12737.77997            |             |
| 5119.330619           | 4115.111028       | 5536.017961          | 8783.966405            |             |
| 4923.486536           | 0.835227397       | 0.01647103           | 0.087450348            | GANAB       |
| 11                    | 62624826          | 62646726             | - 5030                 |             |
| protein_coding        | glucosidase II    | alpha subunit        | [Source:HGNC           |             |
| Symbol;Acc:HGNC:4138] | -                 | 5642 7645            | 13027 5096             | 4503        |
| 5642                  | 61.34226524       | 67.01059323          | 119.9717196            |             |
| 48.98494793           | 39.01149194       | 52.36138586          |                        |             |
| ENSG00000165029       | 483.6099804       | 510.7500786          | 254.2275882            |             |
| 743.3878843           | 705.4998254       | 491.5889753          | 416.1958824            |             |
| 646.8255616           | -0.636542665      | 0.01647524           | 0.087450348            | ABCA1       |
| 9                     | 104781002         | 104928237            | - 11350                |             |
| protein_coding        | ATP binding       | cassette subfamily A | member 1 [Source:HGNC  |             |
| Symbol;Acc:HGNC:29]   | -                 | 418 551              | 260 740                | 772         |
| 501                   | 2.014072654       | 2.140374141          | 1.061157731            |             |
| 3.152369193           | 2.964012539       | 2.060572503          |                        |             |
| ENSG00000172137       | 69.41770054       | 179.8285213          | 34.22294457            |             |
| 262.1949159           | 591.2673407       | 204.092828           | 94.48972214            |             |
| 352.5183616           | -1.898584256      | 0.016486421          | 0.087479318            | CALB2       |
| 16                    | 71358713          | 71390438             | + 1703                 |             |
| protein_coding        | calbindin 2       | [Source:HGNC         | Symbol;Acc:HGNC:1435]  | -           |
| 60                    | 194 35            | 261 647              | 208                    | 1.926776386 |
| 5.022512658           | 0.952041439       | 7.410151307          | 16.55572601            |             |
| 5.701573442           |                   |                      |                        |             |
| ENSG00000146374       | 42.807582         | 60.25182416          | 33.24514615            |             |
| 84.38457065           | 97.78300688       | 102.046414           | 45.43485077            |             |
| 94.73799719           | -1.058368128      | 0.01655875           | 0.08783262             | RSP03       |
| 6                     | 127118604         | 127197765            | + 3179                 |             |
| protein_coding        | R-spondin 3       | [Source:HGNC         | Symbol;Acc:HGNC:20866] | -           |
| 37                    | 65 34             | 84 107               | 104                    | 0.636510993 |
| 0.901481434           | 0.495439747       | 1.277585502          | 1.466735649            |             |
| 1.527175145           |                   |                      |                        |             |
| ENSG00000165609       | 1843.039949       | 1711.151806          | 1676.924284            |             |
| 1471.707095           | 1333.321561       | 1344.265262          | 1743.705346            |             |
| 1383.097973           | 0.334129914       | 0.016574408          | 0.087885182            | NUDT5       |
| 10                    | 12165325          | 12196144             | - 4969                 |             |
| protein_coding        | nudix hydrolase 5 | [Source:HGNC         | Symbol;Acc:HGNC:8052]  |             |
| -                     | 1593 1846         | 1715 1465            | 1459 1370              |             |
| 17.5324049            | 16.3793498        | 15.98812678          | 14.25508609            |             |
| 12.7951356            | 12.87056482       |                      |                        |             |
| ENSG00000165512       | 1034.323738       | 735.0722547          | 616.0130022            |             |
| 481.1929683           | 664.3761309       | 491.5889753          | 795.1363317            |             |
| 545.7193582           | 0.541677254       | 0.016622806          | 0.088085468            | ZNF22       |
| 10                    | 45000475          | 45005326             | + 2551                 |             |

|                                          |                                                 |             |             |             |                |             |  |
|------------------------------------------|-------------------------------------------------|-------------|-------------|-------------|----------------|-------------|--|
| protein_coding                           | zinc finger protein 22 [Source:HGNC             |             |             |             |                |             |  |
| Symbol;Acc:HGNC:13012]                   | zf-C2H2                                         | 894         | 793         | 630         | 479            | 727         |  |
| 501                                      | 19.16557145                                     | 13.70555689 | 11.44017181 |             |                |             |  |
| 9.078754476                              | 12.41888341                                     | 9.167972525 |             |             |                |             |  |
| ENSG00000110090                          | 1627.845078                                     | 1674.07376  | 1623.145371 |             |                |             |  |
| 1383.304212                              | 1129.530808                                     | 1344.265262 | 1641.68807  |             |                |             |  |
| 1285.700094                              | 0.352910268                                     | 0.016623705 | 0.088085468 |             |                | CPT1A       |  |
| 11                                       | 68754620                                        | 68844410    | -           | 6565        |                |             |  |
| protein_coding                           | carnitine palmitoyltransferase 1A [Source:HGNC  |             |             |             |                |             |  |
| Symbol;Acc:HGNC:2328]                    | -                                               | 1407        | 1806        | 1660        | 1377           | 1236        |  |
| 1370                                     | 11.7207143                                      | 12.12877595 | 11.71320687 |             |                |             |  |
| 10.1414587                               | 8.204315218                                     | 9.74163543  |             |             |                |             |  |
| ENSG00000124593                          | 4.627846703                                     | 25.95463194 | 35.20074298 |             |                |             |  |
| 51.23348932                              | 42.95141424                                     | 112.8397847 | 21.92774054 |             |                |             |  |
| 69.00822943                              | -1.644491891                                    | 0.01665074  | 0.088198152 |             |                |             |  |
| AL365205.1                               | 6                                               | 41780349    | 41790141    | +           |                | 4479        |  |
| protein_coding                           | novel transcript                                |             |             | -           | 4              | 28          |  |
| 36                                       | 51                                              | 47          | 115         | 0.048839774 | 0.275620126    |             |  |
| 0.372326454                              | 0.55054184                                      | 0.457272826 | 1.198568373 |             |                |             |  |
| ENSG00000202111                          | 49.74935206                                     | 74.15609127 | 59.64570339 |             |                |             |  |
| 84.38457065                              | 116.0602044                                     | 164.8442073 | 61.18371557 |             |                |             |  |
| 121.7629941                              | -0.990283936                                    | 0.016657285 | 0.088202255 |             |                |             |  |
| VTRNA1-2                                 | 5                                               | 140718925   | 140719013   | +           |                | 89          |  |
| misc_RNA                                 | vault RNA 1-2 [Source:HGNC                      |             |             |             |                |             |  |
| Symbol;Acc:HGNC:12655]                   | -                                               | 43          | 80          | 61          | 84             | 127         |  |
| 168                                      | 26.42245468                                     | 39.6309003  | 31.74989433 |             |                |             |  |
| 45.63420572                              | 62.18309184                                     | 88.11813786 |             |             |                |             |  |
| ENSG00000156256                          | 2301.196773                                     | 1809.408627 | 1996.664366 |             |                |             |  |
| 1497.826129                              | 1754.610965                                     | 1489.485159 | 2035.756589 |             |                |             |  |
| 1580.640751                              | 0.364488138                                     | 0.016745826 | 0.08864039  |             |                | USP16       |  |
| 21                                       | 29024629                                        | 29054488    | +           | 5694        |                |             |  |
| protein_coding                           | ubiquitin specific peptidase 16 [Source:HGNC    |             |             |             |                |             |  |
| Symbol;Acc:HGNC:12614]                   | -                                               | 1989        | 1952        | 2042        | 1491           | 1920        |  |
| 1518                                     | 19.10345999                                     | 15.11458783 | 16.61271944 |             |                |             |  |
| 12.66080725                              | 14.69407877                                     | 12.44515599 |             |             |                |             |  |
| ENSG00000111669                          | 14887.78284                                     | 16665.65456 | 17833.08751 |             |                |             |  |
| 18508.34916                              | 19921.23147                                     | 22760.27519 | 16462.17497 |             |                |             |  |
| 20396.61861                              | -0.309133269                                    | 0.016778307 | 0.088751554 |             |                | TPI1        |  |
| 12                                       | 6867119                                         | 6870948     | +           | 2700        | protein_coding |             |  |
| triosephosphate isomerase 1 [Source:HGNC | Symbol;Acc:HGNC:12009]                          | -           |             |             |                |             |  |
| 12868                                    | 17979                                           | 18238       | 18424       | 21799       | 23196          | 260.6405604 |  |
| 293.5862598                              | 312.9074497                                     | 329.9296735 | 351.8288145 |             |                |             |  |
| 401.0470921                              |                                                 |             |             |             |                |             |  |
| ENSG00000139629                          | 34.70885027                                     | 15.75816939 | 13.68917783 |             |                |             |  |
| 64.29300621                              | 48.4345735                                      | 59.85414669 | 21.38539916 |             |                |             |  |
| 57.52724213                              | -1.437334576                                    | 0.016778439 | 0.088751554 |             |                | GALNT6      |  |
| 12                                       | 51351247                                        | 51392867    | -           | 7347        |                |             |  |
| protein_coding                           | polypeptide N-acetylgalactosaminyltransferase 6 |             |             |             |                |             |  |
| [Source:HGNC                             | Symbol;Acc:HGNC:4128]                           | -           |             | 30          | 17             | 14          |  |
| 64                                       | 53                                              | 61          | 0.223308846 | 0.102017068 |                |             |  |



|                                                                   |                                                               |             |             |                                 |
|-------------------------------------------------------------------|---------------------------------------------------------------|-------------|-------------|---------------------------------|
| 0.088271489                                                       | 0.421183307                                                   | 0.314357935 | 0.387583992 |                                 |
| ENSG00000233223                                                   | 48.59239038                                                   | 52.83621503 | 69.42368755 |                                 |
| 103.4715569                                                       | 73.10879019                                                   | 181.5248711 | 56.95076432 |                                 |
| 119.3684061                                                       | -1.065693289                                                  | 0.016793416 | 0.088800051 |                                 |
| AC016876.1                                                        | 17                                                            | 7581964     | 7584072     | - 1058 antisense                |
|                                                                   | uncharacterized LOC100996842 [Source:NCBI gene;Acc:100996842] |             |             |                                 |
| -                                                                 | 42                                                            | 57          | 71          | 103 80 185                      |
| 2.170992562                                                       | 2.375325581                                                   | 3.108673685 | 4.707092941 |                                 |
| 3.295056889                                                       | 8.162667318                                                   |             |             |                                 |
| ENSG00000171603                                                   | 2623.989081                                                   | 2603.805755 | 4023.640483 |                                 |
| 2303.497863                                                       | 1665.052697                                                   | 2667.924997 | 3083.811773 |                                 |
| 2212.158519                                                       | 0.479492756                                                   | 0.016818645 | 0.088894713 | CLSTN1                          |
| 1                                                                 | 9729026                                                       | 9824526     | - 5683      | protein_coding                  |
| calsyntenin 1 [Source:HGNC Symbol;Acc:HGNC:17447]                 |                                                               |             |             | - 2268                          |
| 2809                                                              | 4115                                                          | 2293        | 1822        | 2719 21.82529422                |
| 21.7925495                                                        | 33.54243905                                                   | 19.50866788 | 13.9710586  |                                 |
| 22.33456958                                                       |                                                               |             |             |                                 |
| ENSG00000181638                                                   | 230.2353735                                                   | 210.417909  | 316.8066868 |                                 |
| 443.0189959                                                       | 280.5549824                                                   | 463.1337252 | 252.4866564 |                                 |
| 395.5692345                                                       | -0.646945699                                                  | 0.016822948 | 0.088894713 | ZFP41                           |
| 8                                                                 | 143246821                                                     | 143262705   | + 6910      |                                 |
| protein_coding ZFP41 zinc finger protein [Source:HGNC             |                                                               |             |             |                                 |
| Symbol;Acc:HGNC:26786] zf-C2H2                                    |                                                               |             |             | 199 227 324 441 307             |
| 472                                                               | 1.574960774                                                   | 1.448377494 | 2.172048001 |                                 |
| 3.085757254                                                       | 1.936060506                                                   | 3.18867302  |             |                                 |
| ENSG00000198598                                                   | 696.4909288                                                   | 939.0015057 | 852.6402189 |                                 |
| 1027.683521                                                       | 1146.894146                                                   | 1128.397847 | 829.3775511 |                                 |
| 1100.991838                                                       | -0.407827702                                                  | 0.01685334  | 0.089024535 | MMP17                           |
| 12                                                                | 131828393                                                     | 131851783   | + 4003      |                                 |
| protein_coding matrix metalloproteinase 17 [Source:HGNC           |                                                               |             |             |                                 |
| Symbol;Acc:HGNC:7163]                                             |                                                               |             |             | - 602 1013 872 1023 1255        |
| 1150                                                              | 8.224426313                                                   | 11.15726667 | 10.09098012 |                                 |
| 12.35638012                                                       | 13.66207715                                                   | 13.41091118 |             |                                 |
| ENSG00000130559                                                   | 1145.392059                                                   | 1344.079154 | 1481.3646   |                                 |
| 2058.380777                                                       | 1755.524825                                                   | 1462.011124 | 1323.611938 |                                 |
| 1758.638908                                                       | -0.409502119                                                  | 0.016865547 | 0.089058242 |                                 |
| CAMSAP1 9                                                         | 135808487                                                     | 135907228   | - 8642      |                                 |
| protein_coding calmodulin regulated spectrin associated protein 1 |                                                               |             |             |                                 |
| [Source:HGNC Symbol;Acc:HGNC:19946]                               |                                                               |             |             | - 990 1450 1515                 |
| 2049                                                              | 1921                                                          | 1490        | 6.264921669 | 7.397546406                     |
| 8.12083762                                                        | 11.46380824                                                   | 9.686607457 | 8.048557337 |                                 |
| ENSG00000146731                                                   | 13318.94281                                                   | 11222.59746 | 11482.2868  |                                 |
| 10263.77569                                                       | 9732.607694                                                   | 9442.236944 | 12007.94236 |                                 |
| 9812.873444                                                       | 0.291163053                                                   | 0.016873913 | 0.089071653 | CCT6A                           |
| 7                                                                 | 56051630                                                      | 56063989    | + 3901      |                                 |
| protein_coding chaperonin containing TCP1 subunit 6A [Source:HGNC |                                                               |             |             |                                 |
| Symbol;Acc:HGNC:1620]                                             |                                                               |             |             | - 11512 12107 11743 10217 10650 |
| 9623                                                              | 161.3873696                                                   | 136.8341662 | 139.4458412 |                                 |
| 126.6335143                                                       | 118.9685738                                                   | 115.1544091 |             |                                 |
| ENSG00000141252                                                   | 1174.316101                                                   | 1280.119526 | 1260.382158 |                                 |

|                         |                                                   |             |             |             |
|-------------------------|---------------------------------------------------|-------------|-------------|-------------|
| 1730.888277             | 1602.910225                                       | 1417.856426 | 1238.272595 |             |
| 1583.884976             | -0.35484732                                       | 0.016889628 | 0.089123832 | VPS53       |
| 17                      | 508668                                            | 721717      | -           | 20899       |
| protein_coding          | "VPS53, GARP complex subunit [Source:HGNC         |             |             |             |
| Symbol;Acc:HGNC:25608]" | -                                                 | 1015        | 1381        | 1289        |
| 1445                    | 2.656043901                                       | 2.913413515 | 2.857129118 | 1754        |
| 3.986217468             | 3.657317641                                       | 3.227664436 |             |             |
| ENSG00000118412         | 1247.204686                                       | 994.6185741 | 1024.73274  |             |
| 927.2256989             | 781.3501952                                       | 741.7989327 | 1088.852    |             |
| 816.7916089             | 0.414309286                                       | 0.01692331  | 0.089228983 |             |
| CASP8AP2                | 6                                                 | 89829894    | 89874436    | +           |
| protein_coding          | caspase 8 associated protein 2 [Source:HGNC       |             |             |             |
| Symbol;Acc:HGNC:1510]"  | -                                                 | 1078        | 1073        | 1048        |
| 756                     | 7.215032025                                       | 5.78973211  | 5.941396389 | 855         |
| 5.461698308             | 4.559838929                                       | 4.31909365  |             |             |
| ENSG00000102981         | 64.78985384                                       | 248.4229057 | 115.3802131 |             |
| 287.3093715             | 231.206549                                        | 304.176811  | 142.8643242 |             |
| 274.2309105             | -0.936532686                                      | 0.016924667 | 0.089228983 | PARD6A      |
| 16                      | 67660946                                          | 67662778    | +           | 1488        |
| protein_coding          | par-6 family cell polarity regulator alpha        |             |             |             |
| [Source:HGNC            | Symbol;Acc:HGNC:15943]"                           |             |             |             |
| 286                     | 253                                               | 310         | 2.058163199 | 7.940828577 |
| 3.673512584             | 9.293179343                                       | 7.409283078 | 9.725340116 |             |
| ENSG00000267100         | 584.2656462                                       | 641.4501895 | 667.8363182 |             |
| 799.6442647             | 1019.867623                                       | 750.6298724 | 631.1840513 |             |
| 856.7139201             | -0.440653125                                      | 0.016927066 | 0.089228983 | ILF3-       |
| DT                      | 19                                                | 10651862    | 10653844    | -           |
| lincRNA                 | ILF3 divergent tranacript [Source:HGNC            |             |             |             |
| Symbol;Acc:HGNC:27115]" | -                                                 | 505         | 692         | 683         |
| 13.92718603             | 15.38570277                                       | 15.95513361 | 1116        | 765         |
| 24.52449527             | 18.00879925                                       |             | 19.40848204 |             |
| ENSG00000183508         | 38.1797353                                        | 75.08304241 | 30.3117509  |             |
| 114.5219173             | 108.7493254                                       | 87.32818123 | 47.8581762  |             |
| 103.5331413             | -1.109242709                                      | 0.016947266 | 0.089304673 | TENT5C      |
| 1                       | 117605934                                         | 117628372   | +           | 5751        |
| protein_coding          | terminal nucleotidyltransferase 5C [Source:HGNC   |             |             |             |
| Symbol;Acc:HGNC:24712]" | -                                                 | 33          | 81          | 31          |
| 89                      | 0.313808921                                       | 0.620977135 | 0.249701288 | 119         |
| 0.958435078             | 0.901700253                                       | 0.722424847 |             |             |
| ENSG00000189306         | 856.15164                                         | 969.5908933 | 804.7280965 |             |
| 1051.793398             | 1346.115599                                       | 1088.168011 | 876.8235433 |             |
| 1162.02567              | -0.406290585                                      | 0.016966626 | 0.089375883 | RRP7A       |
| 22                      | 42509968                                          | 42519802    | -           | 4082        |
| protein_coding          | ribosomal RNA processing 7 homolog A [Source:HGNC |             |             |             |
| Symbol;Acc:HGNC:24286]" | -                                                 | 740         | 1046        | 823         |
| 1109                    | 9.914103126                                       | 11.29776774 | 9.339621809 | 1473        |
| 12.40151942             | 15.72491636                                       | 12.68249155 |             |             |
| ENSG00000157191         | 2035.095588                                       | 2259.906881 | 2379.961345 |             |
| 2560.669888             | 2786.358766                                       | 3040.786895 | 2224.987938 |             |
| 2795.938516             | -0.329305238                                      | 0.016973054 | 0.089378947 | NECAP2      |

|                               |                                                        |             |                                    |                |      |  |
|-------------------------------|--------------------------------------------------------|-------------|------------------------------------|----------------|------|--|
| 1                             | 16440672                                               | 16460078    | +                                  | 5559           |      |  |
| protein_coding                | NECAP endocytosis associated 2                         |             | [Source:HGNC                       |                |      |  |
| Symbol;Acc:HGNC:25528]        | -                                                      | 1759 2438   | 2434                               | 2549           | 3049 |  |
| 3099                          | 17.30469217                                            | 19.33619358 | 20.28272749                        |                |      |  |
| 22.17044335                   | 23.9011803                                             | 26.02381351 |                                    |                |      |  |
| ENSG00000172331               | 516.0049074                                            | 474.5989841 | 372.5411966                        |                |      |  |
| 613.7972937                   | 927.5677756                                            | 498.4574839 | 454.381696                         |                |      |  |
| 679.940851                    | -0.5824862                                             | 0.016997037 | 0.089423626                        |                | BPGM |  |
| 7                             | 134646808                                              | 134679813   | +                                  | 2539           |      |  |
| protein_coding                | bisphosphoglycerate mutase                             |             | [Source:HGNC                       |                |      |  |
| Symbol;Acc:HGNC:1093]         | -                                                      | 446 512     | 381                                | 611            | 1015 |  |
| 508                           | 9.606537238                                            | 8.890807723 | 6.951279171                        |                |      |  |
| 11.63535734                   | 17.42055308                                            | 9.340003678 |                                    |                |      |  |
| ENSG00000121774               | 6836.486542                                            | 7830.883238 | 8086.392902                        |                |      |  |
| 6112.858481                   | 6191.400669                                            | 6311.178221 | 7584.58756                         |                |      |  |
| 6205.145791                   | 0.289719447                                            | 0.016999808 | 0.089423626                        |                |      |  |
| KHDRBS1 1                     | 32013829                                               | 32060850    | +                                  | 3588           |      |  |
| protein_coding                | "KH RNA binding domain containing, signal transduction |             |                                    |                |      |  |
| associated 1                  | [Source:HGNC Symbol;Acc:HGNC:18116]"                   |             | -                                  | 5909           |      |  |
| 8448                          | 8270 6085                                              | 6775 6432   | 90.06504459                        |                |      |  |
| 103.8091007                   | 106.771546                                             | 81.99915267 | 82.28401277                        |                |      |  |
| 83.6834617                    |                                                        |             |                                    |                |      |  |
| ENSG00000100307               | 71.73162389                                            | 119.5766972 | 100.7132369                        |                |      |  |
| 157.7187809                   | 168.1502174                                            | 182.5060866 | 97.34051931                        |                |      |  |
| 169.4583616                   | -0.79637902                                            | 0.01700266  | 0.089423626                        |                | CBX7 |  |
| 22                            | 39120167                                               | 39152674    | -                                  | 7461           |      |  |
| protein_coding                | chromobox 7                                            |             | [Source:HGNC Symbol;Acc:HGNC:1557] |                | -    |  |
| 62                            | 129 103                                                | 157 184     | 186                                | 0.454453406    |      |  |
| 0.762301244                   | 0.63950308                                             | 1.017428336 | 1.07468053                         |                |      |  |
| 1.163756019                   |                                                        |             |                                    |                |      |  |
| ENSG00000070610               | 836.4832915                                            | 792.5432254 | 1026.688337                        |                |      |  |
| 553.5226003                   | 551.971366                                             | 794.7845708 | 885.2382846                        |                |      |  |
| 633.426179                    | 0.483118717                                            | 0.017004938 | 0.089423626                        |                | GBA2 |  |
| 9                             | 35736866                                               | 35749228    | -                                  | 4803           |      |  |
| protein_coding                | glucosylceramidase beta 2                              |             | [Source:HGNC                       |                |      |  |
| Symbol;Acc:HGNC:18986]        | -                                                      | 723 855     | 1050                               | 551            | 604  |  |
| 810                           | 8.232285497                                            | 7.848514881 | 10.12696172                        |                |      |  |
| 5.546770903                   | 5.480030173                                            | 7.872605115 |                                    |                |      |  |
| ENSG00000137868               | 17.35442514                                            | 13.90426711 | 92.89084954                        |                |      |  |
| 16.07325155                   | 0                                                      | 5.887293117 | 41.38318059                        | 7.320181556    |      |  |
| 2.507614557                   | 0.01703263                                             | 0.089538449 | STRA6 15                           |                |      |  |
| 74179466                      | 74212267                                               | -           | 7690                               | protein_coding |      |  |
| stimulated by retinoic acid 6 | [Source:HGNC                                           |             |                                    |                |      |  |
| Symbol;Acc:HGNC:30650]        | -                                                      | 15 15       | 95                                 | 16             | 0    |  |
| 6                             | 0.106674258                                            | 0.086000084 | 0.572268342                        |                |      |  |
| 0.100599277                   | 0                                                      | 0.0364226   |                                    |                |      |  |
| ENSG00000213672               | 734.6706641                                            | 892.6539486 | 949.4422621                        |                |      |  |
| 596.7194639                   | 508.1060918                                            | 750.6298724 | 858.9222916                        |                |      |  |
| 618.4851427                   | 0.474641776                                            | 0.017059915 | 0.089647209                        |                |      |  |
| NCKIPSD 3                     | 48673844                                               | 48686364    | -                                  | 3431           |      |  |

|                        |                                                      |             |             |       |       |           |
|------------------------|------------------------------------------------------|-------------|-------------|-------|-------|-----------|
| protein_coding         | NCK interacting protein with SH3 domain [Source:HGNC |             |             |       |       |           |
| Symbol;Acc:HGNC:15486] | -                                                    | 635         | 963         | 971   | 594   | 556       |
| 765                    | 10.1215662                                           | 12.37483814 | 13.10994796 |       |       |           |
| 8.370799572            | 7.061755409                                          | 10.4084666  |             |       |       |           |
| ENSG00000197933        | 222.1366417                                          | 159.4355962 | 135.9139798 |       |       |           |
| 107.4898698            | 92.29984762                                          | 98.12155195 | 172.4954059 |       |       |           |
| 99.30375644            | 0.795063622                                          | 0.017071378 | 0.089647209 |       |       | ZNF823    |
| 19                     | 11721265                                             | 11739009    | -           | 2459  |       |           |
| protein_coding         | zinc finger protein 823 [Source:HGNC                 |             |             |       |       |           |
| Symbol;Acc:HGNC:30936] | zf-C2H2                                              | 192         | 172         | 139   | 107   | 101       |
| 100                    | 4.270093776                                          | 3.083925487 | 2.618537075 |       |       |           |
| 2.103906646            | 1.78986981                                           | 1.898399047 |             |       |       |           |
| ENSG00000136451        | 2643.657429                                          | 2056.904582 | 2386.805934 |       |       |           |
| 1725.865385            | 2026.027348                                          | 1784.83103  | 2362.455981 |       |       |           |
| 1845.574588            | 0.355730824                                          | 0.017072263 | 0.089647209 |       |       | VEZF1     |
| 17                     | 57971547                                             | 57988259    | -           | 4913  |       |           |
| protein_coding         | vascular endothelial zinc finger 1 [Source:HGNC      |             |             |       |       |           |
| Symbol;Acc:HGNC:12949] | zf-C2H2                                              | 2285        | 2219        | 2441  | 1718  | 2217      |
| 1819                   | 25.43514121                                          | 19.91335775 | 23.015662   |       |       |           |
| 16.90743054            | 19.66425633                                          | 17.28351102 |             |       |       |           |
| ENSG00000160201        | 93.71389573                                          | 259.5463194 | 321.6956789 |       |       |           |
| 93.42577465            | 70.36721056                                          | 165.8254228 | 224.985298  |       |       |           |
| 109.8728027            | 1.036439021                                          | 0.017076776 | 0.089647209 |       |       | U2AF1     |
| 21                     | 43092956                                             | 43107587    | -           | 11112 |       |           |
| protein_coding         | U2 small nuclear RNA auxiliary factor 1 [Source:HGNC |             |             |       |       |           |
| Symbol;Acc:HGNC:12453] | -                                                    | 81          | 280         | 329   | 93    | 77        |
| 169                    | 0.398646081                                          | 1.110963413 | 1.371532556 |       |       |           |
| 0.404661542            | 0.301965335                                          | 0.709970833 |             |       |       |           |
| ENSG00000119242        | 673.3516953                                          | 717.460183  | 743.1267963 |       |       |           |
| 1054.807133            | 950.4142725                                          | 824.2210364 | 711.3128915 |       |       |           |
| 943.1474807            | -0.406626455                                         | 0.017084123 | 0.08965499  |       |       | CCDC92    |
| 12                     | 123918660                                            | 123972831   | -           | 8223  |       |           |
| protein_coding         | coiled-coil domain containing 92 [Source:HGNC        |             |             |       |       |           |
| Symbol;Acc:HGNC:29563] | -                                                    | 582         | 774         | 760   | 1050  | 1040      |
| 840                    | 3.870681236                                          | 4.149966858 | 4.281399538 |       |       |           |
| 6.173909019            | 5.511396382                                          | 4.768645427 |             |       |       |           |
| ENSG00000102144        | 35276.91845                                          | 38200.58347 | 30721.44844 |       |       |           |
| 35275.76427            | 47563.66504                                          | 50908.4048  | 34732.98345 |       |       |           |
| 44582.61137            | -0.360179195                                         | 0.01709132  | 0.089661978 |       |       | PGK1      |
| X                      | 77910739                                             | 78129296    | +           | 5512  |       |           |
| protein_coding         | phosphoglycerate kinase 1 [Source:HGNC               |             |             |       |       |           |
| Symbol;Acc:HGNC:8896]  | -                                                    | 30491       | 41211       | 31419 | 35115 | 52047     |
| 51883                  | 302.5221455                                          | 329.6384794 | 264.0496555 |       |       |           |
| 308.024088             | 411.4765507                                          | 439.4018762 |             |       |       |           |
| ENSG00000180104        | 1317.779349                                          | 1384.865004 | 1189.002874 |       |       |           |
| 1613.352625            | 1538.026174                                          | 1827.023297 | 1297.215742 |       |       |           |
| 1659.467365            | -0.355209185                                         | 0.017098752 | 0.089668025 |       |       | EXOC3     |
| 5                      | 443158                                               | 471937      | +           | 8182  |       |           |
| exocyst complex        | component 3 [Source:HGNC                             |             |             |       |       |           |
| Symbol;Acc:HGNC:30378] | -                                                    |             |             |       |       |           |
| 1139                   | 1494                                                 | 1216        | 1606        | 1683  | 1862  | 7.6130549 |

|                                  |                                                        |             |             |             |             |
|----------------------------------|--------------------------------------------------------|-------------|-------------|-------------|-------------|
|                                  | 8.050541262                                            | 6.884565807 | 9.49046042  | 8.963615905 |             |
|                                  | 10.62346612                                            |             |             |             |             |
| ENSG00000108848                  | 3351.717975                                            | 3164.611195 | 3241.40175  |             |             |
| 2753.548907                      | 2270.027936                                            | 2776.83992  | 3252.576973 |             |             |
| 2600.138921                      | 0.323056525                                            | 0.017110016 | 0.089668025 | LUC7L3      |             |
| 17                               | 50719544                                               | 50756213    | +           | 8151        |             |
| protein_coding                   | LUC7 like 3 pre-mRNA splicing factor [Source:HGNC      |             |             |             |             |
| Symbol;Acc:HGNC:24309]           | -                                                      | 2897        | 3414        | 3315        | 2741        |
| 2830                             | 19.43713785                                            | 18.46658467 | 18.83974826 |             | 2484        |
| 16.25920695                      | 13.28003734                                            | 16.20770705 |             |             |             |
| ENSG00000144034                  | 760.1238209                                            | 684.0899419 | 574.9454687 |             |             |
| 513.3394715                      | 519.0724104                                            | 430.753613  | 673.0530772 |             |             |
| 487.7218316                      | 0.463962677                                            | 0.017110069 | 0.089668025 | TPRKB       |             |
| 2                                | 73729104                                               | 73737400    | -           | 2047        |             |
| protein_coding                   | TP53RK binding protein [Source:HGNC                    |             |             |             |             |
| Symbol;Acc:HGNC:24259]           | -                                                      | 657         | 738         | 588         | 511         |
| 439                              | 17.55263167                                            | 15.89543718 | 13.30644181 |             | 568         |
| 12.06991673                      | 12.09174809                                            | 10.01135158 |             |             |             |
| ENSG00000176222                  | 91.39997238                                            | 76.93694469 | 58.66790497 |             |             |
| 150.6867333                      | 156.270039                                             | 109.8961382 | 75.66827401 |             |             |
| 138.9509702                      | -0.879309695                                           | 0.017133039 | 0.089757633 | ZNF404      |             |
| 19                               | 43872363                                               | 43901385    | -           | 2479        |             |
| protein_coding                   | zinc finger protein 404 [Source:HGNC                   |             |             |             |             |
| Symbol;Acc:HGNC:19417]           | zf-C2H2                                                | 79          | 83          | 60          | 150         |
| 112                              | 1.742790875                                            | 1.476167106 | 1.121184743 |             | 171         |
| 2.925606746                      | 3.005925283                                            | 2.109053185 |             |             |             |
| ENSG00000213033                  | 3.470885027                                            | 0           | 1.955596832 | 30.13734666 |             |
| 1.827719755                      | 22.56795695                                            | 1.808827286 | 18.17767445 |             |             |
| -3.361867058                     | 0.01714867                                             | 1           | AURKAP1     | 1           |             |
| 220266706                        | 220267917                                              | -           | 1212        |             |             |
| transcribed_processed_pseudogene | aurora kinase A pseudogene 1                           |             |             |             |             |
| [Source:HGNC                     | Symbol;Acc:HGNC:18611]                                 | -           | 3           | 0           | 2           |
| 30                               | 2                                                      | 23          | 0.135367169 | 0           | 0.076441611 |
| 1.196795235                      | 0.071909451                                            | 0.885872565 |             |             |             |
| ENSG00000088986                  | 3584.267271                                            | 3204.470094 | 3100.598778 |             |             |
| 2466.239535                      | 2841.190359                                            | 2634.56367  | 3296.445381 |             |             |
| 2647.331188                      | 0.316082601                                            | 0.017180228 | 0.089958777 | DYNLL1      |             |
| 12                               | 120469850                                              | 120498493   | +           | 2957        |             |
| protein_coding                   | dynein light chain LC8-type 1 [Source:HGNC             |             |             |             |             |
| Symbol;Acc:HGNC:15476]           | -                                                      | 3098        | 3457        | 3171        | 2455        |
| 2685                             | 57.2960657                                             | 51.54446224 | 49.67608635 |             | 3109        |
| 40.14222015                      | 45.81714202                                            | 42.38761698 |             |             |             |
| ENSG00000108984                  | 429.2327817                                            | 305.8938765 | 357.8742203 |             |             |
| 265.2086506                      | 181.8581156                                            | 267.8718368 | 364.3336262 |             |             |
| 238.3128677                      | 0.612058686                                            | 0.017183203 | 0.089958777 | MAP2K6      |             |
| 17                               | 69414698                                               | 69553861    | +           | 16655       |             |
| protein_coding                   | mitogen-activated protein kinase kinase 6 [Source:HGNC |             |             |             |             |
| Symbol;Acc:HGNC:6846]            | -                                                      | 371         | 330         | 366         | 264         |
| 273                              | 1.21821512                                             | 0.873581163 | 1.0179792   |             | 199         |
| 0.766408842                      | 0.520675373                                            | 0.765180768 |             |             |             |

|                                                 |                                          |                                 |             |                            |             |
|-------------------------------------------------|------------------------------------------|---------------------------------|-------------|----------------------------|-------------|
| ENSG00000142686                                 | 1014.65539                               | 1053.016496                     | 1114.690194 |                            |             |
| 1431.523966                                     | 1235.538554                              | 1409.025486                     | 1060.78736  |                            |             |
| 1358.696002                                     | -0.356719595                             | 0.017225958                     | 0.090129036 |                            |             |
| C1orf216                                        | 1                                        | 35713875                        | 35719472    | -                          | 3629        |
|                                                 | protein_coding                           | chromosome 1 open reading frame | 216         |                            |             |
| [Source:HGNC Symbol;Acc:HGNC:26800]             | -                                        | 877                             | 1136        |                            | 1140        |
| 1425                                            | 1352                                     | 1436                            | 13.21622239 | 13.80146922                |             |
| 14.55192135                                     | 18.98580922                              | 16.23485152                     | 18.47198246 |                            |             |
| ENSG00000163820                                 | 1634.786848                              | 1406.184881                     | 1318.072265 |                            |             |
| 2083.495232                                     | 1686.071474                              | 1851.553685                     | 1453.014664 |                            |             |
| 1873.706797                                     | -0.367166015                             | 0.017227516                     | 0.090129036 |                            | FYC01       |
| 3                                               | 45917899                                 | 45995824                        | -           | 8895                       |             |
| protein_coding                                  | FYVE and coiled-coil domain containing 1 | [Source:HGNC                    |             |                            |             |
| Symbol;Acc:HGNC:14673]                          | -                                        | 1413                            | 1517        | 1348                       | 2074        |
| 1887                                            | 8.687422077                              | 7.519233757                     | 7.020150061 |                            | 1845        |
| 11.2736362                                      | 9.038763347                              | 9.903118677                     |             |                            |             |
| ENSG00000222808                                 | 3.470885027                              | 9.269511408                     | 8.800185745 |                            | 0           |
| 0                                               | 0                                        | 7.18019406                      | 0           | 5.339576876                |             |
| 0.017290836                                     | 1                                        | RNU4-47P                        | 17          | 77152561                   |             |
| 77152674                                        | -                                        | 114                             | snRNA       | "RNA, U4 small nuclear 47, |             |
| pseudogene [Source:HGNC Symbol;Acc:HGNC:46983]" | -                                        | 3                               | 10          |                            |             |
| 9                                               | 0                                        | 0                               | 0           | 1.439166748                | 3.867489174 |
| 3.657127604                                     | 0                                        | 0                               | 0           |                            |             |
| ENSG00000250267                                 | 2.313923351                              | 13.90426711                     | 5.866790497 |                            | 0           |
| 0                                               | 0                                        | 7.36166032                      | 0           | 5.376905585                |             |
| 0.01731411                                      | 1                                        | AC021237.1                      | 8           | 109298598                  |             |
| 109316513                                       | +                                        | 1643                            | antisense   | novel transcript           |             |
| -                                               | 2                                        | 15                              | 6           | 0                          | 0           |
| 0.066571316                                     | 0.402520176                              | 0.169167193                     | 0           | 0                          | 0           |
| ENSG00000178764                                 | 119.1670526                              | 179.8285213                     | 118.3136084 |                            |             |
| 290.3231062                                     | 212.9293514                              | 194.2806729                     | 139.1030608 |                            |             |
| 232.5110435                                     | -0.73882781                              | 0.017327478                     | 0.090620992 |                            | ZHX2        |
| 8                                               | 122781394                                | 122974512                       | +           | 4716                       |             |
| protein_coding                                  | zinc fingers and homeoboxes 2            | [Source:HGNC                    |             |                            |             |
| Symbol;Acc:HGNC:18513]                          | Homeobox                                 | 103                             | 194         | 121                        | 289         |
| 233                                             | 198                                      | 1.194422954                     | 1.813685126 | 1.188540622                |             |
| 2.962956413                                     | 2.152983603                              | 1.959915871                     |             |                            |             |
| ENSG00000163913                                 | 756.6529359                              | 704.482867                      | 999.3099813 |                            |             |
| 557.5409132                                     | 602.2336592                              | 634.8464411                     | 820.1485948 |                            |             |
| 598.2070045                                     | 0.455326225                              | 0.017333668                     | 0.090622359 |                            | IFT122      |
| 3                                               | 129440036                                | 129520507                       | +           | 9636                       |             |
| protein_coding                                  | intraflagellar transport 122             | [Source:HGNC                    |             |                            |             |
| Symbol;Acc:HGNC:13556]                          | -                                        | 654                             | 760         | 1022                       | 555         |
| 647                                             | 3.711723955                              | 3.477368846                     | 4.913110821 |                            | 659         |
| 2.784821789                                     | 2.980212425                              | 3.134393552                     |             |                            |             |
| ENSG00000162607                                 | 4338.606284                              | 3436.207879                     | 3747.901329 |                            |             |
| 2725.420716                                     | 3476.322974                              | 2801.370308                     | 3840.905164 |                            |             |
| 3001.037999                                     | 0.355634862                              | 0.017351022                     | 0.090635578 |                            | USP1        |
| 1                                               | 62436297                                 | 62451804                        | +           | 4263                       |             |
| protein_coding                                  | ubiquitin specific peptidase 1           | [Source:HGNC                    |             |                            |             |

|                        |                                                        |             |      |             |             |        |
|------------------------|--------------------------------------------------------|-------------|------|-------------|-------------|--------|
| Symbol;Acc:HGNC:12607] | -                                                      | 3750        | 3707 | 3833        | 2713        | 3804   |
| 2855                   | 48.10726287                                            | 38.339038   |      | 41.65104887 |             |        |
| 30.77057966            | 38.88514953                                            | 31.26344381 |      |             |             |        |
| ENSG00000177303        | 399.1517781                                            | 634.0345803 |      | 809.6170886 |             |        |
| 1106.040622            | 658.8929716                                            | 1044.013313 |      | 614.2678157 |             |        |
| 936.3156356            | -0.606796824                                           | 0.017352583 |      | 0.090635578 |             |        |
| CASKIN2 17             | 75500261                                               | 75515583    |      | -           | 5823        |        |
| protein_coding         | CASK interacting protein 2 [Source:HGNC                |             |      |             |             |        |
| Symbol;Acc:HGNC:18200] | -                                                      | 345         | 684  | 828         | 1101        | 721    |
| 1064                   | 3.240164188                                            | 5.178968501 |      | 6.586974808 |             |        |
| 9.142011123            | 5.395691022                                            | 8.52983978  |      |             |             |        |
| ENSG00000132471        | 1910.143727                                            | 3134.948758 |      | 2730.013178 |             |        |
| 3178.485494            | 3305.431177                                            | 3945.467604 |      | 2591.701888 |             |        |
| 3476.461425            | -0.423243785                                           | 0.017353983 |      | 0.090635578 |             | WBP2   |
| 17                     | 75845699                                               | 75856507    |      | -           | 5399        |        |
| protein_coding         | WW domain binding protein 2 [Source:HGNC               |             |      |             |             |        |
| Symbol;Acc:HGNC:12738] | -                                                      | 1651        | 3382 | 2792        | 3164        | 3617   |
| 4021                   | 16.72354944                                            | 27.61812773 |      | 23.95546152 |             |        |
| 28.33507483            | 29.19401179                                            | 34.76696509 |      |             |             |        |
| ENSG00000152049        | 219.8227184                                            | 205.7831533 |      | 247.3829993 |             |        |
| 133.6089035            | 175.4610965                                            | 87.32818123 |      | 224.3296236 |             |        |
| 132.1327271            | 0.762556495                                            | 0.017373402 |      | 0.09070601  |             | KCNE4  |
| 2                      | 223051814                                              | 223198399   |      | +           | 4124        |        |
| protein_coding         | potassium voltage-gated channel subfamily E regulatory |             |      |             |             |        |
| subunit 4 [Source:HGNC | Symbol;Acc:HGNC:6244]                                  | -           |      | 190         | 222         |        |
| 253                    | 133                                                    | 192         | 89   | 2.51958873  | 2.373385451 |        |
| 2.841870739            | 1.559316236                                            | 2.028809033 |      | 1.007435814 |             |        |
| ENSG00000169914        | 603.9339947                                            | 663.6970168 |      | 576.9010655 |             |        |
| 441.0098395            | 460.5853782                                            | 464.1149407 |      | 614.8440257 |             |        |
| 455.2367195            | 0.433775348                                            | 0.017393787 |      | 0.090762213 |             | OTUD3  |
| 1                      | 19882513                                               | 19912945    |      | +           | 6767        |        |
| protein_coding         | OTU deubiquitinase 3 [Source:HGNC                      |             |      |             |             |        |
| Symbol;Acc:HGNC:29038] | -                                                      | 522         | 716  | 590         | 439         | 504    |
| 473                    | 4.218606712                                            | 4.664990931 |      | 4.038855272 |             |        |
| 3.136675273            | 3.245584777                                            | 3.262954367 |      |             |             |        |
| ENSG00000211584        | 297.3391507                                            | 322.578997  |      | 234.6716199 |             |        |
| 469.1380297            | 356.4053522                                            | 428.791182  |      | 284.8632559 |             |        |
| 418.1115213            | -0.553275711                                           | 0.017401403 |      | 0.090762213 |             |        |
| SLC48A1 12             | 47753916                                               | 47782753    |      | +           | 4921        |        |
| protein_coding         | solute carrier family 48 member 1 [Source:HGNC         |             |      |             |             |        |
| Symbol;Acc:HGNC:26035] | -                                                      | 257         | 348  | 240         | 467         | 390    |
| 437                    | 2.856106983                                            | 3.117883164 |      | 2.259229408 |             |        |
| 4.588436566            | 3.453582538                                            | 4.145473161 |      |             |             |        |
| ENSG00000163320        | 4073.66206                                             | 3330.535449 |      | 3589.497986 |             |        |
| 2387.882434            | 3410.525063                                            | 2663.01892  |      | 3664.565165 |             |        |
| 2820.475472            | 0.377359299                                            | 0.017401978 |      | 0.090762213 |             | CGGBP1 |
| 3                      | 88051944                                               | 88149885    |      | -           | 6490        |        |
| protein_coding         | CGG triplet repeat binding protein 1 [Source:HGNC      |             |      |             |             |        |
| Symbol;Acc:HGNC:1888]  | -                                                      | 3521        | 3593 | 3671        | 2377        | 3732   |
| 2714                   | 29.66989716                                            | 24.40880278 |      | 26.20246464 |             |        |

|                                              |                                                  |             |                |        |  |
|----------------------------------------------|--------------------------------------------------|-------------|----------------|--------|--|
| 17.70866007                                  | 25.05852685                                      | 19.52140998 |                |        |  |
| ENSG00000106804                              | 469.7264403                                      | 453.2791079 | 466.4098445    |        |  |
| 327.4925004                                  | 367.3716707                                      | 295.3458714 | 463.1384642    |        |  |
| 330.0700142                                  | 0.488175237                                      | 0.017408807 | 0.090766862    | C5     |  |
| 9                                            | 120952335                                        | 121050276   | - 6533         |        |  |
| protein_coding                               | complement C5 [Source:HGNC Symbol;Acc:HGNC:1331] |             |                |        |  |
| -                                            | 406 489                                          | 477 326     | 402 301        |        |  |
| 3.398662879                                  | 3.300123243                                      | 3.382269246 | 2.412715745    |        |  |
| 2.681464135                                  | 2.150799235                                      |             |                |        |  |
| ENSG00000109084                              | 1759.738709                                      | 1698.17449  | 1893.017734    |        |  |
| 1465.679626                                  | 1374.445256                                      | 1426.687365 | 1783.643644    |        |  |
| 1422.270749                                  | 0.326703779                                      | 0.017429024 | 0.090841288    | TMEM97 |  |
| 17                                           | 28319095                                         | 28328685    | + 3034         |        |  |
| protein_coding                               | transmembrane protein 97 [Source:HGNC            |             |                |        |  |
| Symbol;Acc:HGNC:28106]                       | -                                                | 1521 1832   | 1936 1459      | 1504   |  |
| 1454                                         | 27.41626886                                      | 26.62219443 | 29.5591698     |        |  |
| 23.2509623                                   | 21.6018456                                       | 22.37148772 |                |        |  |
| ENSG00000237424                              | 166.6024813                                      | 139.9696223 | 181.8705054    |        |  |
| 276.2590111                                  | 238.517428                                       | 242.3602333 | 162.814203     |        |  |
| 252.3788908                                  | -0.632781504                                     | 0.017471373 | 0.091030976    | FOXD2- |  |
| AS1 1                                        | 47432133                                         | 47434641    | - 2509         |        |  |
| lincRNA FOXD2 adjacent opposite strand RNA 1 | [Source:HGNC                                     |             |                |        |  |
| Symbol;Acc:HGNC:44256]                       | -                                                | 144 151     | 186 275        | 261    |  |
| 247                                          | 3.138748683                                      | 2.65344594  | 3.434114242    |        |  |
| 5.299479897                                  | 4.533132818                                      | 4.595601132 |                |        |  |
| ENSG00000100897                              | 802.9314029                                      | 824.0595642 | 1023.754942    |        |  |
| 705.2139119                                  | 601.3197993                                      | 670.1701998 | 883.5819696    |        |  |
| 658.9013037                                  | 0.423846383                                      | 0.017480544 | 0.091047725    | DCAF11 |  |
| 14                                           | 24114195                                         | 24125242    | + 6350         |        |  |
| protein_coding                               | DDB1 and CUL4 associated factor 11 [Source:HGNC  |             |                |        |  |
| Symbol;Acc:HGNC:20258]                       | -                                                | 694 889     | 1047 702       | 658    |  |
| 683                                          | 5.976961493                                      | 6.172512721 | 7.637925398    |        |  |
| 5.345207921                                  | 4.515551149                                      | 5.021032289 |                |        |  |
| ENSG00000276900                              | 35.86581195                                      | 28.73548537 | 43.02313031    |        |  |
| 57.26095866                                  | 134.337402                                       | 60.83536221 | 35.87480921    |        |  |
| 84.14457428                                  | -1.232050063                                     | 0.017489789 | 0.09106485     |        |  |
| AC023157.3                                   | 12 31729117                                      | 31731204    | + 2088         |        |  |
| antisense                                    | "novel transcript, antisense to AMN1"            |             |                |        |  |
| 31                                           | 31 44                                            | 57 147      | 62 0.811943692 |        |  |
| 0.654583656                                  | 0.97616816                                       | 1.319913825 | 3.067929943    |        |  |
| 1.38614043                                   |                                                  |             |                |        |  |
| ENSG00000154144                              | 901.2731454                                      | 1221.721604 | 1043.31091     |        |  |
| 1606.320577                                  | 1420.13825                                       | 1202.970227 | 1055.43522     |        |  |
| 1409.809684                                  | -0.416924439                                     | 0.017522904 | 0.091206208    | TBRG1  |  |
| 11                                           | 124622836                                        | 124635398   | + 6627         |        |  |
| protein_coding                               | transforming growth factor beta regulator 1      |             |                |        |  |
| [Source:HGNC Symbol;Acc:HGNC:29551]          | -                                                |             | 779 1318       | 1067   |  |
| 1599                                         | 1554 1226                                        | 6.428582176 | 8.768643177    |        |  |
| 7.458472703                                  | 11.66628844                                      | 10.21862923 | 8.636137243    |        |  |
| ENSG00000112837                              | 139.9923628                                      | 26.88158308 | 92.89084954    |        |  |



|                                               |                                                     |             |             |                |             |
|-----------------------------------------------|-----------------------------------------------------|-------------|-------------|----------------|-------------|
| 32.1465031                                    | 27.41579632                                         | 39.24862078 | 86.58826513 |                |             |
| 32.9369734                                    | 1.391684086                                         | 0.017546275 | 0.091282661 | TBX18          |             |
| 6                                             | 84687351                                            | 84764519    | -           | 8469           |             |
| protein_coding                                | T-box 18 [Source:HGNC Symbol;Acc:HGNC:11595]        |             |             |                | T-box       |
| 121                                           | 29                                                  | 95          | 32          | 30             | 40          |
|                                               | 0.150973187                                         | 0.519629655 | 0.182691803 | 0.781354199    | 0.154364603 |
|                                               | 0.220482383                                         |             |             |                |             |
| ENSG00000115053                               | 17267.65301                                         | 18527.8994  | 19180.49373 |                |             |
| 15998.91276                                   | 13305.79982                                         | 15613.10135 | 18325.34871 |                |             |
| 14972.60464                                   | 0.291568568                                         | 0.017549535 | 0.091282661 | NCL            |             |
| 2                                             | 231453531                                           | 231483641   | -           | 6929           |             |
| protein_coding                                | nucleolin [Source:HGNC Symbol;Acc:HGNC:7667]        |             |             |                | -           |
| 14925                                         | 19988                                               | 19616       | 15926       | 14560          | 15912       |
|                                               | 127.1840755                                         | 131.1421645 | 111.1315487 | 117.7981558    | 91.56919819 |
|                                               | 107.2013476                                         |             |             |                |             |
| ENSG00000279894                               | 23.13923351                                         | 0           | 3.911193665 | 0              | 0           |
| 0                                             | 9.01680906                                          | 0           | 5.659880302 | 0.01754971     |             |
| 1                                             | 273965.1                                            | X           | 103596608   | 103598904      |             |
| +                                             | 2297                                                | TEC         | TEC         | -              | 20          |
| 0                                             | 0                                                   | 0           | 0.476171845 | 0              | 0.08066803  |
| 0                                             | 0                                                   | 0           |             |                |             |
| ENSG00000121690                               | 305.4378824                                         | 305.8938765 | 234.6716199 |                |             |
| 162.741672                                    | 201.049173                                          | 187.4121642 | 282.0011262 |                |             |
| 183.7343364                                   | 0.617230452                                         | 0.017564785 | 0.091330909 | DEPDC7         |             |
| 11                                            | 33015864                                            | 33033582    | +           | 3326           |             |
| protein_coding                                | DEP domain containing 7 [Source:HGNC                |             |             |                |             |
| Symbol;Acc:HGNC:29899]                        | -                                                   | 264         | 330         | 240            | 162         |
| 191                                           | 4.340866151                                         | 4.37447212  | 3.342654214 | 220            |             |
| 2.355016673                                   | 2.882431755                                         | 2.680755207 |             |                |             |
| ENSG00000130023                               | 554.1846427                                         | 473.672033  | 371.5633981 |                |             |
| 322.4696093                                   | 348.1806133                                         | 293.3834403 | 466.4733579 |                |             |
| 321.3445543                                   | 0.536522778                                         | 0.017606585 | 0.091517123 | ERMARD         |             |
| 6                                             | 169751622                                           | 169781584   | +           | 4251           |             |
| protein_coding                                | ER membrane associated RNA degradation [Source:HGNC |             |             |                |             |
| Symbol;Acc:HGNC:21056]                        | -                                                   | 479         | 511         | 380            | 321         |
| 299                                           | 6.162247271                                         | 5.299852136 | 4.140901952 | 381            |             |
| 3.651027835                                   | 3.905642325                                         | 3.28341758  |             |                |             |
| ENSG00000108518                               | 12487.08737                                         | 15318.79455 | 16131.71827 |                |             |
| 10882.59588                                   | 11425.99005                                         | 12849.99844 | 14645.86673 |                |             |
| 11719.52812                                   | 0.321650326                                         | 0.017624866 | 0.091581006 | PFN1           |             |
| 17                                            | 4945652                                             | 4949061     | -           | 1987           |             |
| profilin 1 [Source:HGNC Symbol;Acc:HGNC:8881] | -                                                   |             |             | protein_coding |             |
| 16498                                         | 10833                                               | 12503       | 13096       | 297.0564746    | 366.6940299 |
| 384.6235641                                   | 263.6040585                                         | 274.2047425 | 307.6711927 |                |             |
| ENSG00000196422                               | 307.7518057                                         | 450.4982545 | 746.0601915 |                |             |
| 246.1216644                                   | 278.7272626                                         | 391.5049923 | 501.4367506 |                |             |
| 305.4513064                                   | 0.716097533                                         | 0.017636615 | 0.09161092  |                |             |
| PPP1R26 9                                     | 135479079                                           | 135488893   | +           | 5276           |             |
| protein_coding                                | protein phosphatase 1 regulatory subunit 26         |             |             |                |             |
| [Source:HGNC Symbol;Acc:HGNC:29089]           | -                                                   |             | 266         | 486            | 763         |

|                                                                   |              |     |             |                                |             |
|-------------------------------------------------------------------|--------------|-----|-------------|--------------------------------|-------------|
| 245                                                               | 305          | 399 | 2.757220904 | 4.061303453                    |             |
| 6.699188637                                                       | 2.245238672  |     | 2.519147809 | 3.530320582                    |             |
| ENSG00000236719                                                   | 32.39492692  |     | 6.488657986 | 4.888992081                    | 0           |
| 0                                                                 | 2.943646558  |     | 14.590859   | 0.981215519                    |             |
| 3.898225447                                                       | 0.017646915  |     | 1           | OVAAL                          | 1 180552749 |
| 180566520                                                         | +            |     | 1604        | lincRNA ovarian adenocarcinoma |             |
| amplified long non-coding RNA [Source:HGNC Symbol;Acc:HGNC:49422] |              |     |             |                                |             |
| -                                                                 | 28           | 7   | 5           | 0                              | 0 3         |
| 0.954659239                                                       | 0.192409998  |     | 0.1444003   | 0                              | 0           |
| 0.087309787                                                       |              |     |             |                                |             |
| ENSG00000141524                                                   | 93.71389573  |     | 172.4129122 | 344.1850425                    |             |
| 68.3113191                                                        | 80.41966921  |     | 144.2386814 | 203.4372835                    |             |
| 97.65655656                                                       | 1.060436637  |     | 0.017653599 | 0.091667989                    | TMC6        |
| 17                                                                | 78110458     |     | 78132407    | -                              | 8669        |
| protein_coding transmembrane channel like 6 [Source:HGNC          |              |     |             |                                |             |
| Symbol;Acc:HGNC:18021] -                                          |              |     |             |                                |             |
| 147                                                               | 0.510988032  |     | 81          | 186                            | 352 68 88   |
| 0.379263568                                                       | 0.442356351  |     | 0.945971167 | 1.880945085                    |             |
| ENSG00000103485                                                   | 458.1568236  |     | 0.791579189 |                                |             |
| 335.5291262                                                       | 376.5102695  |     | 472.7450818 | 672.7253103                    |             |
| 371.1188477                                                       | 0.526806601  |     | 401.3171475 | 534.5424052                    |             |
| 16                                                                | 29679008     |     | 0.017664556 | 0.09169374                     | QPRT        |
| protein_coding quinolinate phosphoribosyltransferase [Source:HGNC |              |     |             |                                |             |
| Symbol;Acc:HGNC:9755] -                                           |              |     |             |                                |             |
| 409                                                               | 5.946343006  |     | 29698699    | +                              | 3642        |
| 4.434123059                                                       | 4.929647575  |     | 396         | 510                            | 688 334 412 |
| ENSG00000197070                                                   | 171.230328   |     | 6.173965419 | 8.750864367                    |             |
| 346.5794866                                                       | 326.2479762  |     | 5.242390916 |                                |             |
| 347.5819046                                                       | -0.598863886 |     | 271.5966843 | 244.449604                     |             |
| 9                                                                 | 137605654    |     | 369.9182508 | 229.0922054                    |             |
| protein_coding arrestin domain containing 1 [Source:HGNC          |              |     |             |                                |             |
| Symbol;Acc:HGNC:28633] -                                          |              |     |             |                                |             |
| 377                                                               | 2.11826061   |     | 0.017691638 | 0.091790528                    | ARRDC1      |
| 4.365593296                                                       | 4.071456285  |     | 137615360   | +                              | 3821        |
| ENSG00000081870                                                   | 576.1669145  |     | 148         | 293                            | 250 345 357 |
| 154.7050462                                                       | 392.0458874  |     | 3.380839397 | 3.030856864                    |             |
| 362.7939668                                                       | 0.760735303  |     | 4.605855921 |                                |             |
| 1                                                                 | 53916574     |     | 678.5282351 | 589.6124449                    |             |
| protein_coding heat shock protein family B (small) member 11      |              |     |             |                                |             |
| [Source:HGNC Symbol;Acc:HGNC:25019] -                             |              |     |             |                                |             |
| 154                                                               | 429          | 552 | 541.6309667 | 614.7691982                    |             |
| 8.631996488                                                       | 2.300983076  |     | 0.017695211 | 0.091790528                    | HSPB11      |
| ENSG00000151470                                                   | 148.0910945  |     | 53945929    | -                              | 3236        |
| 72.32963199                                                       | 100.5245865  |     | 8.416190217 | 9.973245876                    |             |
| 83.78382002                                                       | 0.876446767  |     | 5.777066636 | 7.96299789                     |             |
| C4orf33                                                           | 4            |     | 109.3802346 | 204.359869                     |             |
| protein_coding chromosome 4 open reading frame 33 [Source:HGNC    |              |     |             |                                |             |
| Symbol;Acc:HGNC:27025] -                                          |              |     |             |                                |             |
| 80                                                                | 0.997876987  |     | 78.49724156 | 153.9437327                    |             |
| 0.496256305                                                       | 0.683319174  |     | 0.017708522 | 0.091828419                    |             |
|                                                                   |              |     | 129116640   | +                              | 7015        |
|                                                                   |              |     | 128         | 118                            | 209 72 110  |
|                                                                   |              |     | 0.741631709 | 1.380133401                    |             |
|                                                                   |              |     | 0.532363593 |                                |             |

|                                 |            |                                                                                          |                |                  |             |                |
|---------------------------------|------------|------------------------------------------------------------------------------------------|----------------|------------------|-------------|----------------|
| ENSG00000253414                 | 0          | 7.415609127                                                                              | 18.57816991    | 0                | 0           |                |
|                                 | 0          | 8.664593011                                                                              | 0              | 5.611091202      | 0.0177192   |                |
|                                 | 1          | AC124067.2                                                                               | 8              | 37516410         | 37517021    |                |
|                                 | -          | 510                                                                                      | sense_intronic | novel transcript |             | -              |
|                                 | 0          | 8                                                                                        | 19             | 0                | 0           | 0              |
| 0.691598064                     |            | 1.725781784                                                                              | 0              | 0                | 0           |                |
| ENSG00000075651                 |            | 252.2176453                                                                              | 229.8838829    | 238.5828135      |             |                |
| 190.8698622                     |            | 120.6295038                                                                              | 138.3513882    | 240.2281139      |             |                |
| 149.9502514                     |            | 0.680578196                                                                              | 0.017724212    | 0.091878612      |             | PLD1           |
|                                 | 3          | 171600405                                                                                | 171810950      | -                | 12859       |                |
| protein_coding                  |            | phospholipase D1 [Source:HGNC Symbol;Acc:HGNC:9067]                                      |                |                  |             |                |
|                                 | -          | 218                                                                                      | 248            | 244              | 190         | 132 141        |
| 0.927137207                     |            | 0.850312263                                                                              | 0.878992331    | 0.714410158      |             |                |
| 0.447327227                     |            | 0.511867967                                                                              |                |                  |             |                |
| ENSG00000072195                 |            | 643.2706917                                                                              | 1183.716607    | 767.5717567      |             |                |
| 1438.556014                     |            | 968.6914701                                                                              | 1365.852003    | 864.8530184      |             |                |
| 1257.699829                     |            | -0.539108694                                                                             | 0.017740039    | 0.091929484      |             | SPEG           |
|                                 | 2          | 219434846                                                                                | 219498287      | +                | 17910       |                |
| protein_coding                  |            | SPEG complex locus [Source:HGNC Symbol;Acc:HGNC:16901]                                   |                |                  |             |                |
|                                 | -          | 556                                                                                      | 1277           | 785              | 1432        | 1060 1392      |
| 1.697750701                     |            | 3.143614399                                                                              | 2.030376259    | 3.865882488      |             |                |
| 2.579104131                     |            | 3.628187187                                                                              |                |                  |             |                |
| ENSG00000132604                 |            | 1153.490791                                                                              | 1210.59819     | 1184.113882      |             |                |
| 1553.077931                     |            | 1580.977588                                                                              | 1367.814434    | 1182.734288      |             |                |
| 1500.623318                     |            | -0.343345909                                                                             | 0.017797329    | 0.092195112      |             | TERF2          |
|                                 | 16         | 69355561                                                                                 | 69408571       | -                | 5621        |                |
| protein_coding                  |            | telomeric repeat binding factor 2 [Source:HGNC Symbol;Acc:HGNC:11729]                    |                |                  |             |                |
|                                 |            | MYB                                                                                      | 997            | 1306             | 1211        | 1546 1730      |
|                                 | 1394       | 9.700101658                                                                              | 10.243858      | 9.980056815      |             |                |
| 13.29833046                     |            | 13.41192498                                                                              | 11.57697843    |                  |             |                |
| ENSG00000099866                 |            | 5.784808379                                                                              | 16.68512054    | 3.911193665      |             |                |
| 56.25638043                     |            | 21.01877718                                                                              | 29.43646558    | 8.793707526      |             |                |
| 35.57054107                     |            | -2.004618764                                                                             | 0.01782732     | 0.09231919       |             |                |
| MADCAM1                         | 19         | 489176                                                                                   | 505342         | +                | 2651        | protein_coding |
| mucosal vascular addressin cell |            | adhesion molecule 1 [Source:HGNC Symbol;Acc:HGNC:6765]                                   |                |                  |             |                |
|                                 |            | -                                                                                        | 5              | 18               | 4           | 56 23          |
|                                 | 30         | 0.103146617                                                                              | 0.299362044    | 0.069896064      |             |                |
| 1.021361577                     |            | 0.378073908                                                                              | 0.528271964    |                  |             |                |
| ENSG00000172638                 |            | 1317.779349                                                                              | 1255.091845    | 1689.635663      |             |                |
| 776.5389656                     |            | 1237.366274                                                                              | 1074.430994    | 1420.835619      |             |                |
| 1029.445411                     |            | 0.464633368                                                                              | 0.017835318    | 0.092329326      |             | EFEMP2         |
|                                 | 11         | 65866441                                                                                 | 65873592       | -                | 5397        |                |
| protein_coding                  |            | EGF containing fibulin extracellular matrix protein 2 [Source:HGNC Symbol;Acc:HGNC:3219] |                |                  |             |                |
|                                 |            | -                                                                                        |                | 1139             | 1354        | 1728           |
|                                 | 773        | 1354                                                                                     | 1095           | 11.5416          | 11.06114802 | 14.83179711    |
|                                 | 6.92513577 | 10.93263488                                                                              | 9.471259523    |                  |             |                |
| ENSG00000143157                 |            | 3038.18136                                                                               | 2640.8838      | 2815.08164       |             |                |
| 3814.383509                     |            | 3353.86575                                                                               | 3367.531663    | 2831.382267      |             |                |
| 3511.926974                     |            | -0.310925357                                                                             | 0.017848411    | 0.092365828      |             | POGK           |
|                                 | 1          | 166839447                                                                                | 166856344      | +                | 8448        |                |

|                                      |                                                    |             |             |             |      |        |
|--------------------------------------|----------------------------------------------------|-------------|-------------|-------------|------|--------|
| protein_coding                       | pogo transposable element derived with KRAB domain |             |             |             |      |        |
| [Source:HGNC Symbol;Acc:HGNC:18800]  |                                                    | -           | 2626        | 2849        | 2879 |        |
| 3797                                 | 3670                                               | 3432        | 16.99947579 | 14.86868299 |      |        |
| 15.78665854                          | 21.73141014                                        |             | 18.93087801 | 18.96441323 |      |        |
| ENSG00000158623                      | 986.8883094                                        |             | 841.6716359 | 949.4422621 |      |        |
| 690.1452385                          | 784.0917748                                        |             | 611.2972686 | 926.0007358 |      |        |
| 695.178094                           | 0.412963838                                        |             | 0.017909085 | 0.092648455 |      | COPG2  |
| 7                                    | 130506238                                          |             | 130668748   | -           | 4139 |        |
| protein_coding                       | coatomer protein complex subunit gamma 2           |             |             |             |      |        |
| [Source:HGNC Symbol;Acc:HGNC:2237]   |                                                    | -           | 853         | 908         | 971  | 687    |
| 623                                  | 11.27063324                                        |             | 9.672180221 | 10.86741518 |      | 858    |
| 8.025323118                          | 9.033383733                                        |             | 7.026493617 |             |      |        |
| ENSG00000198648                      | 951.0224974                                        |             | 891.7269975 | 877.0851793 |      |        |
| 674.071987                           | 744.7958001                                        |             | 665.2641222 | 906.6115581 |      |        |
| 694.7106364                          | 0.383600067                                        |             | 0.017921794 | 0.092682836 |      | STK39  |
| 2                                    | 167954020                                          |             | 168248141   | -           | 4247 |        |
| protein_coding                       | serine/threonine kinase 39                         |             |             |             |      |        |
| [Source:HGNC Symbol;Acc:HGNC:17717]  |                                                    | -           | 822         | 962         | 897  | 671    |
| 678                                  | 10.58483931                                        |             | 9.986809576 | 9.783914253 |      | 815    |
| 7.639087343                          | 8.362457922                                        |             | 7.452353867 |             |      |        |
| ENSG00000231084                      | 9.255693406                                        |             | 31.51633879 | 27.37835565 |      | 0      |
| 4.569299387                          | 5.887293117                                        |             | 22.71679595 | 3.485530835 |      |        |
| 2.701772929                          | 0.017961057                                        |             | 0.092854473 | RPL22P24    |      |        |
| 1                                    | 185171335                                          |             | 185171710   | -           | 376  |        |
| processed_pseudogene                 | ribosomal protein L22 pseudogene 24                |             |             |             |      |        |
| [Source:HGNC Symbol;Acc:HGNC:53758]  |                                                    | -           | 8           | 34          |      | 28     |
| 0                                    | 5                                                  | 6           | 1.163581626 | 3.986805329 |      |        |
| 3.449631002                          | 0                                                  | 0.579483077 | 0.744919668 |             |      |        |
| ENSG00000058453                      | 549.556796                                         |             | 620.1303132 | 597.4348323 |      |        |
| 1082.935323                          | 601.3197993                                        |             | 840.9017002 | 589.0406472 |      |        |
| 841.718941                           | -0.514183584                                       |             | 0.017973435 | 0.092887054 |      | CROCC  |
| 1                                    | 16740273                                           |             | 16972979    | +           | 8871 |        |
| protein_coding                       | "ciliary rootlet coiled-coil, rootletin            |             |             |             |      |        |
| [Source:HGNC Symbol;Acc:HGNC:21299]" |                                                    | -           | 475         | 669         | 611  | 1078   |
| 857                                  | 2.928301184                                        |             | 3.324968203 | 3.19059064  |      | 658    |
| 5.875534735                          | 3.23230186                                         |             | 4.509768808 |             |      |        |
| ENSG00000240342                      | 6763.597956                                        |             | 5633.082083 | 5421.892218 |      |        |
| 7049.125384                          | 7354.744293                                        |             | 7641.706466 | 5939.524086 |      |        |
| 7348.525381                          | -0.307295535                                       |             | 0.017986005 | 0.092894103 |      | RPS2P5 |
| 12                                   | 118246084                                          |             | 118246962   | +           | 879  |        |
| processed_pseudogene                 | ribosomal protein S2 pseudogene 5                  |             |             |             |      |        |
| [Source:HGNC Symbol;Acc:HGNC:31386]  |                                                    | -           | 5846        | 6077        | 5545 | 7017   |
| 7788                                 | 363.717878                                         |             | 304.8135853 | 292.2234954 |      | 8048   |
| 385.9791256                          | 398.9860307                                        |             | 413.6024509 |             |      |        |
| ENSG00000131165                      | 4535.289769                                        |             | 6069.67607  | 5323.134578 |      |        |
| 6134.959202                          | 7030.324037                                        |             | 6879.302007 | 5309.366806 |      |        |
| 6681.528415                          | -0.331452768                                       |             | 0.017986953 | 0.092894103 |      | CHMP1A |
| 16                                   | 89644431                                           |             | 89657845    | -           | 3208 |        |
| protein_coding                       | charged multivesicular body protein 1A             |             |             |             |      |        |
| [Source:HGNC Symbol;Acc:HGNC:8740]   |                                                    | -           | 3920        | 6548        | 5444 | 6107   |
|                                      |                                                    |             |             |             |      | 7693   |

|                                                     |                                                   |             |                |        |
|-----------------------------------------------------|---------------------------------------------------|-------------|----------------|--------|
| 7011                                                | 66.82614676                                       | 89.99290456 | 78.61152344    |        |
| 92.04385019                                         | 104.5008855                                       | 102.0214856 |                |        |
| ENSG00000140497                                     | 1124.566749                                       | 1400.623174 | 1239.848392    |        |
| 1862.488024                                         | 1503.299498                                       | 1528.733779 | 1255.012771    |        |
| 1631.5071                                           | -0.377857845                                      | 0.018010126 | 0.092982369    | SCAMP2 |
| 15                                                  | 74843730                                          | 74873365    | - 5000         |        |
| protein_coding                                      | secretory carrier membrane protein 2 [Source:HGNC |             |                |        |
| Symbol;Acc:HGNC:10564]                              | -                                                 | 972 1511    | 1268 1854      | 1645   |
| 1558                                                | 10.6314126                                        | 13.3238096  | 11.7476691     |        |
| 17.92837559                                         | 14.3368749                                        | 14.5459967  |                |        |
| ENSG00000107938                                     | 1003.085773                                       | 872.2610235 | 916.1971159    |        |
| 758.4565576                                         | 688.1364877                                       | 689.7945102 | 930.5146374    |        |
| 712.1291852                                         | 0.385557716                                       | 0.018068458 | 0.093252031    | EDRF1  |
| 10                                                  | 125719515                                         | 125764143   | + 7741         |        |
| protein_coding                                      | erythroid differentiation regulatory factor 1     |             |                |        |
| [Source:HGNC Symbol;Acc:HGNC:24640]                 | -                                                 | 867         | 941            | 937    |
| 755                                                 | 753 703                                           | 6.125150198 | 5.359527627    |        |
| 5.607186214                                         | 4.715753553                                       | 4.238932554 | 4.239399004    |        |
| ENSG00000011304                                     | 10979.5663                                        | 12987.51243 | 15118.71911    |        |
| 11167.89609                                         | 8590.282848                                       | 10764.91546 | 13028.59928    |        |
| 10174.3648                                          | 0.356842811                                       | 0.018077041 | 0.093264842    | PTBP1  |
| 19                                                  | 797075 812327                                     | + 6883      | protein_coding |        |
| polypyrimidine tract binding protein 1 [Source:HGNC |                                                   |             |                |        |
| Symbol;Acc:HGNC:9583]                               | -                                                 | 9490 14011  | 15462 11117    | 9400   |
| 10971                                               | 75.40205038                                       | 89.74811205 | 104.0615655    |        |
| 78.09281042                                         | 59.51256678                                       | 74.40711765 |                |        |
| ENSG00000062822                                     | 1644.042541                                       | 2284.007611 | 2371.161159    |        |
| 1483.762034                                         | 1387.239294                                       | 1842.722746 | 2099.737104    |        |
| 1571.241358                                         | 0.418831793                                       | 0.018097965 | 0.093314454    | POLD1  |
| 19                                                  | 50384204                                          | 50418016    | + 4932         |        |
| protein_coding                                      | "DNA polymerase delta 1, catalytic subunit        |             |                |        |
| [Source:HGNC Symbol;Acc:HGNC:9175]"                 | -                                                 | 1421        | 2464           | 2425   |
| 1477                                                | 1518 1878                                         | 15.75671656 | 22.02680939    |        |
| 22.77671727                                         | 14.47966932                                       | 13.41242484 | 17.77536617    |        |
| ENSG00000127423                                     | 282.2986489                                       | 377.2691143 | 282.5837423    |        |
| 161.7370937                                         | 220.2402305                                       | 229.6044316 | 314.0505018    |        |
| 203.8605853                                         | 0.623816076                                       | 0.018104107 | 0.093314454    | AUNIP  |
| 1                                                   | 25831913                                          | 25859458    | - 2408         |        |
| protein_coding                                      | aurora kinase A and ninein interacting protein    |             |                |        |
| [Source:HGNC Symbol;Acc:HGNC:28363]                 | -                                                 | 244         | 407            | 289    |
| 161                                                 | 241 234                                           | 5.541509173 | 7.4519835      |        |
| 5.559603453                                         | 3.232738757                                       | 4.361332098 | 4.536338047    |        |
| ENSG00000174720                                     | 851.5237933                                       | 995.5455253 | 951.3978589    |        |
| 737.360415                                          | 749.3650995                                       | 640.7337342 | 932.8223925    |        |
| 709.1530829                                         | 0.395895359                                       | 0.01810497  | 0.093314454    | LARP7  |
| 4                                                   | 112636964                                         | 112657592   | + 4083         |        |
| protein_coding                                      | La ribonucleoprotein domain family member 7       |             |                |        |
| [Source:HGNC Symbol;Acc:HGNC:24912]                 | -                                                 | 736         | 1074           | 973    |
| 734                                                 | 820 653                                           | 9.858098362 | 11.59735255    |        |
| 11.03915716                                         | 8.691963551                                       | 8.751713061 | 7.465859921    |        |

|                  |                                     |                                     |                                    |             |                |
|------------------|-------------------------------------|-------------------------------------|------------------------------------|-------------|----------------|
| ENSG00000285781  | 6.941770054                         | 9.269511408                         | 4.888992081                        | 0           |                |
| 0                | 0                                   | 7.033424515                         | 0                                  | 5.307600793 |                |
| 0.018122161      | 1                                   | AL117340.1                          | 10                                 | 31362799    |                |
| 31364049         | -                                   | 1251                                | unprocessed_pseudogene             | putative    |                |
| UPF0607 protein  | FLJ37424                            | [Source:NCBI gene;Acc:100505502]    | -                                  |             |                |
| 6                | 10                                  | 5                                   | 0                                  | 0           | 0.26229418     |
| 0.352433066      | 0.185146348                         | 0                                   | 0                                  | 0           |                |
| ENSG00000112576  | 1337.447697                         | 2049.488972                         | 1991.775374                        |             |                |
| 1455.633844      | 1193.501                            | 1347.208908                         | 1792.904014                        |             |                |
| 1332.114584      | 0.429313863                         | 0.01819415                          | 0.093708595                        | CCND3       |                |
| 6                | 41934933                            | 42050357                            | -                                  | 5802        |                |
| protein_coding   | cyclin D3                           | [Source:HGNC Symbol;Acc:HGNC:1585]  | -                                  |             |                |
| 1156             | 2211                                | 2037                                | 1449                               | 1306        | 1373           |
| 16.80138084      | 16.2635654                          | 12.07513174                         | 9.808984544                        |             |                |
| 11.04685996      |                                     |                                     |                                    |             |                |
| ENSG00000170035  | 1644.042541                         | 1354.275617                         | 1659.323912                        |             |                |
| 904.1203998      | 1234.624694                         | 1335.434322                         | 1552.547357                        |             |                |
| 1158.059805      | 0.42252588                          | 0.018199082                         | 0.093708595                        | UBE2E3      |                |
| 2                | 180967248                           | 181076585                           | +                                  | 2973        |                |
| protein_coding   | ubiquitin conjugating enzyme E2 E3  | [Source:HGNC Symbol;Acc:HGNC:12479] | -                                  | 1421        | 1461           |
| 1361             | 26.13929568                         | 21.66652512                         | 26.44170094                        | 1697        | 900            |
| 14.63689026      | 19.80245511                         | 21.37023273                         |                                    |             | 1351           |
| ENSG00000092330  | 519.4757924                         | 650.7197009                         | 619.9241958                        |             |                |
| 714.2551159      | 993.3656868                         | 756.5171655                         | 596.706563                         |             |                |
| 821.3793227      | -0.460591482                        | 0.018199831                         | 0.093708595                        | TINF2       |                |
| 14               | 24239643                            | 24242674                            | -                                  | 2712        |                |
| protein_coding   | TERF1 interacting nuclear factor 2  | [Source:HGNC Symbol;Acc:HGNC:11824] | -                                  | 449         | 702            |
| 771              | 9.054226791                         | 11.41251562                         | 10.82934098                        | 634         | 711            |
| 12.67596794      | 17.46620112                         | 13.27121633                         |                                    |             | 1087           |
| ENSG00000105971  | 19.66834849                         | 6.488657986                         | 0                                  | 0           | 0              |
| 0                | 8.719002158                         | 0                                   | 5.612863597                        | 0.018224263 |                |
| 1                | CAV2                                | 7                                   | 116287380                          | 116508541   | +              |
| 6926             | protein_coding                      | caveolin 2                          | [Source:HGNC Symbol;Acc:HGNC:1528] | -           | 17             |
| 0                | 0.134233572                         | 0.044560444                         | 0                                  | 0           | 0              |
| 0                |                                     |                                     | 0                                  | 0           | 0              |
| ENSG00000047056  | 665.2529635                         | 809.228346                          | 678.5921008                        |             |                |
| 1255.722778      | 816.0768705                         | 907.6243555                         | 717.6911368                        |             |                |
| 993.1413345      | -0.467863192                        | 0.018237209                         | 0.093869435                        | WDR37       |                |
| 10               | 1049538                             | 1132384                             | +                                  | 6000        | protein_coding |
| repeat domain 37 | [Source:HGNC Symbol;Acc:HGNC:31406] | -                                   |                                    |             | WD             |
| 873              | 694                                 | 1250                                | 893                                | 925         | 575            |
| 6.415004292      | 5.358098287                         | 10.07302656                         | 6.485729121                        | 5.240965575 |                |
| 7.196751686      |                                     |                                     |                                    |             |                |
| ENSG00000188529  | 5494.410998                         | 4288.075978                         | 4213.333375                        |             |                |
| 3792.282788      | 3831.814466                         | 3461.728353                         | 4665.27345                         |             |                |
| 3695.275202      | 0.336009233                         | 0.018295406                         | 0.094137283                        | SRSF10      |                |
| 1                | 23964804                            | 23980927                            | -                                  | 10277       |                |

|                                  |                                                              |              |      |             |             |          |        |   |
|----------------------------------|--------------------------------------------------------------|--------------|------|-------------|-------------|----------|--------|---|
| protein_coding                   | serine and arginine rich splicing factor 10                  |              |      |             |             |          |        |   |
|                                  | [Source:HGNC Symbol;Acc:HGNC:16713]                          | -            |      | 4749        | 4626        |          | 4309   |   |
|                                  | 3775                                                         | 4193         | 3528 | 25.27147122 | 19.8460111  |          |        |   |
| 19.42283377                      |                                                              | 17.7603621   |      | 17.77940012 | 16.02537702 |          |        |   |
| ENSG00000122367                  |                                                              | 2.313923351  |      | 0.926951141 | 7.822387329 |          |        |   |
| 23.10529911                      |                                                              | 34.72667534  |      | 9.812155195 | 3.687753941 |          |        |   |
| 22.54804321                      |                                                              | -2.609855782 |      | 0.018321778 | 0.09424126  |          | LDB3   |   |
|                                  | 10                                                           | 86668449     |      | 86736068    | +           | 6676     |        |   |
| protein_coding                   | LIM domain binding 3 [Source:HGNC                            |              |      |             |             |          |        |   |
|                                  | Symbol;Acc:HGNC:15710]                                       | -            | 2    | 1           | 8           | 23       | 38     |   |
|                                  | 10                                                           | 0.016383564  |      | 0.006604161 | 0.055510625 |          |        |   |
| 0.166576113                      |                                                              | 0.248042367  |      | 0.069924554 |             |          |        |   |
| ENSG00000187147                  |                                                              | 989.2022327  |      | 1890.980327 | 1530.254521 |          |        |   |
| 1932.808499                      |                                                              | 2017.802609  |      | 2174.373591 | 1470.145694 |          |        |   |
| 2041.661567                      |                                                              | -0.472967205 |      | 0.018329578 | 0.094249667 |          | RNF220 |   |
|                                  | 1                                                            | 44405194     |      | 44651724    | +           | 9687     |        |   |
| protein_coding                   | ring finger protein 220 [Source:HGNC                         |              |      |             |             |          |        |   |
|                                  | Symbol;Acc:HGNC:25552]                                       | -            | 855  | 2040        | 1565        | 1924     | 2208   |   |
|                                  | 2216                                                         | 4.826935857  |      | 9.284848583 | 7.483891765 |          |        |   |
| 9.603222349                      |                                                              | 9.93272398   |      | 10.67889932 |             |          |        |   |
| ENSG00000099381                  |                                                              | 843.4250616  |      | 1122.537832 | 1425.630091 |          |        |   |
| 1643.489971                      |                                                              | 1361.651217  |      | 1646.479642 | 1130.530995 |          |        |   |
| 1550.540277                      |                                                              | -0.454949713 |      | 0.018379342 | 0.094456175 |          | SETD1A |   |
|                                  | 16                                                           | 30957294     |      | 30984664    | +           | 6832     |        |   |
| protein_coding                   | SET domain containing 1A [Source:HGNC                        |              |      |             |             |          |        |   |
|                                  | Symbol;Acc:HGNC:29010]                                       | -            | 729  | 1211        | 1458        | 1636     | 1490   |   |
|                                  | 1678                                                         | 5.835450418  |      | 7.815022693 | 9.885806877 |          |        |   |
| 11.57808299                      |                                                              | 9.503793875  |      | 11.46542439 |             |          |        |   |
| ENSG00000131016                  |                                                              | 27.76708022  |      | 64.88657986 | 31.28954932 |          |        |   |
| 115.5264955                      |                                                              | 84.07510872  |      | 77.51602604 | 41.31440313 |          |        |   |
| 92.37254343                      |                                                              | -1.154815541 |      | 0.018382097 | 0.094456175 |          | AKAP12 |   |
|                                  | 6                                                            | 151239999    |      | 151358557   | +           | 8741     |        |   |
| protein_coding                   | A-kinase anchoring protein 12 [Source:HGNC                   |              |      |             |             |          |        |   |
|                                  | Symbol;Acc:HGNC:370]                                         | -            | 24   | 70          | 32          | 115      | 92     |   |
|                                  | 79                                                           | 0.150156741  |      | 0.353078179 | 0.169586514 |          |        |   |
| 0.636118369                      |                                                              | 0.458654126  |      | 0.421902411 |             |          |        |   |
| ENSG00000226652                  |                                                              | 0            | 0    | 0.977798416 | 4.018312888 |          |        |   |
| 12.79403828                      |                                                              | 10.79337071  |      | 0.325932805 |             |          |        |   |
| 9.201907295                      |                                                              | -4.661072474 |      | 0.01841221  | 1           | PSMD10P2 |        |   |
|                                  | 3                                                            | 186760693    |      | 186762050   | +           | 1087     |        |   |
| transcribed_processed_pseudogene | "proteasome 26S subunit, non-                                |              |      |             |             |          |        |   |
|                                  | ATPase, 10 pseudogene 2 [Source:HGNC Symbol;Acc:HGNC:30151]" | -            |      |             |             |          |        |   |
|                                  | 0                                                            | 0            | 1    | 4           | 14          | 11       | 0      | 0 |
|                                  | 0.042616022                                                  | 0.177922824  |      | 0.56125095  | 0.472399225 |          |        |   |
| ENSG00000030066                  |                                                              | 3461.629334  |      | 3008.883403 | 3732.256554 |          |        |   |
| 2844.965525                      |                                                              | 2706.852957  |      | 2633.582454 | 3400.923097 |          |        |   |
| 2728.466979                      |                                                              | 0.317758101  |      | 0.018422488 | 0.094631911 |          | NUP160 |   |
|                                  | 11                                                           | 47778087     |      | 47848555    | -           | 8576     |        |   |
| protein_coding                   | nucleoporin 160 [Source:HGNC Symbol;Acc:HGNC:18017]          |              |      |             |             |          |        |   |
|                                  | -                                                            | 2992         | 3246 | 3817        | 2832        | 2962     | 2684   |   |

|                                       |                                                       |                                       |              |        |
|---------------------------------------|-------------------------------------------------------|---------------------------------------|--------------|--------|
| 19.07969946                           | 16.68774678                                           | 20.61768231                           | 15.96649882  |        |
| 15.05077556                           | 14.60978332                                           |                                       |              |        |
| ENSG00000144381                       | 16802.55442                                           | 15706.26013                           | 16007.53787  |        |
| 14102.26908                           | 13026.15869                                           | 13338.64377                           | 16172.11747  |        |
| 13489.02385                           | 0.261707807                                           | 0.01845646                            | 0.094774571  | HSPD1  |
| 2                                     | 197486581                                             | 197516737                             | - 4245       |        |
| protein_coding                        | heat shock protein family D (Hsp60) member 1          |                                       |              |        |
| [Source:HGNC Symbol;Acc:HGNC:5261]    | -                                                     |                                       | 14523 16944  | 16371  |
| 14038                                 | 14254 13594                                           | 187.0998139                           | 175.9836035  |        |
| 178.648745                            | 159.8927456                                           | 146.3247051                           | 149.4911927  |        |
| ENSG00000273489                       | 0 0.926951141                                         | 0                                     | 13.05951689  |        |
| 7.310879019                           | 6.868508636                                           | 0.308983714                           |              |        |
| 9.079634847                           | -4.640002989                                          | 0.018491339                           | 1 AC008264.2 |        |
| 7                                     | 131493964                                             | 131497694                             | - 3731       |        |
| antisense                             | "novel transcript, antisense to MKLN1"                |                                       |              | 0      |
| 1                                     | 0 13                                                  | 8 7                                   | 0 0.01181704 |        |
| 0                                     | 0.168468737                                           | 0.093437957                           | 0.0875828    |        |
| ENSG00000214279                       | 104.1265508                                           | 152.0199871                           | 131.0249878  |        |
| 188.8607057                           | 204.7046125                                           | 237.4541557                           | 129.0571752  |        |
| 210.3398247                           | -0.702276711                                          | 0.018492733                           | 0.094928947  | SCART1 |
| 10                                    | 133453928                                             | 133523558                             | + 8015       |        |
| protein_coding                        | scavenger receptor family member expressed on T cells |                                       |              |        |
| 1 [Source:HGNC Symbol;Acc:HGNC:32411] | -                                                     |                                       | 90 164       | 134    |
| 188                                   | 224 242                                               | 0.614092362                           | 0.902140706  |        |
| 0.774468445                           | 1.134110938                                           | 1.217876048                           | 1.409476616  |        |
| ENSG00000233765                       | 0 0                                                   | 0 22.10072088                         | 0            |        |
| 4.906077597                           | 0 9.002266161                                         | -5.588361275                          | 0.018514417  |        |
| 1                                     | AL591479.1                                            | 9 66253424                            | 66254464     |        |
| -                                     | 635                                                   | unprocessed_pseudogene CDRT15 protein |              |        |
| pseudogene                            | - 0                                                   | 0 0                                   | 22 0         | 5      |
| 0                                     | 0                                                     | 1.675136386                           | 0 0.36757191 |        |
| ENSG00000188766                       | 411.8783566                                           | 415.2741111                           | 286.4949359  |        |
| 437.9961048                           | 544.6604869                                           | 645.6398118                           | 371.2158012  |        |
| 542.7654679                           | -0.548618397                                          | 0.018534906                           | 0.095113496  | SPRED3 |
| 19                                    | 38388421                                              | 38399587                              | + 5864       |        |
| protein_coding                        | sprouty related EVH1 domain containing 3 [Source:HGNC |                                       |              |        |
| Symbol;Acc:HGNC:31041]                | -                                                     | 356 448                               | 293 436      | 596    |
| 658                                   | 3.320096823                                           | 3.368356192                           | 2.314600883  |        |
| 3.594957365                           | 4.429053189                                           | 5.238150447                           |              |        |
| ENSG00000162642                       | 728.8858557                                           | 808.3013948                           | 678.5921008  |        |
| 1045.765929                           | 894.66882                                             | 966.4972867                           | 738.5931171  |        |
| 968.9773453                           | -0.391273871                                          | 0.018569313                           | 0.095258084  |        |
| C1orf52 1                             | 85249953                                              | 85259672                              | - 3420       |        |
| protein_coding                        | chromosome 1 open reading frame 52 [Source:HGNC       |                                       |              |        |
| Symbol;Acc:HGNC:24871]                | -                                                     | 630 872                               | 694 1041     | 979    |
| 985                                   | 10.07416724                                           | 11.24150186                           | 9.400172433  |        |
| 14.71722196                           | 12.47427125                                           | 13.44485616                           |              |        |
| ENSG00000230417                       | 24.29619519                                           | 7.415609127                           | 18.57816991  | 0      |
| 4.569299387                           | 0                                                     | 16.76332474                           | 1.523099796  |        |
| 3.430698387                           | 0.018584065                                           | 1 LINC00856                           | 10           |        |



|                                                                 |              |                |                     |                    |          |        |
|-----------------------------------------------------------------|--------------|----------------|---------------------|--------------------|----------|--------|
| 78179185                                                        | 78551355     | +              | 9354                | lincRNA long       |          |        |
| intergenic non-protein coding RNA 856 [Source:HGNC              |              |                |                     |                    |          |        |
| Symbol;Acc:HGNC:45111]                                          | -            | 21             | 8                   | 19                 | 0        | 5      |
| 0                                                               | 0.122776894  | 0.037707399    | 0.094093298         | 0                  | 0        |        |
| 0.023293312                                                     | 0            |                |                     |                    |          |        |
| ENSG00000189129                                                 | 5.784808379  | 3.707804563    | 11.73358099         | 0                  |          |        |
| 0                                                               | 0            | 7.075397979    | 0                   | 5.315916392        |          |        |
| 0.018607487                                                     | 1            | PLAC9          | 10                  | 80131682           | 80145359 |        |
| +                                                               | 1240         | protein_coding | placenta specific 9 |                    |          |        |
| [Source:HGNC Symbol;Acc:HGNC:19255]                             |              |                |                     |                    |          |        |
| 0                                                               | 0            | 0              | 0.220517486         | 0.142223795        |          | 12     |
| 0.448293061                                                     | 0            | 0              | 0                   |                    |          |        |
| ENSG00000167291                                                 | 2245.662613  | 2704.843429    | 3717.589578         |                    |          |        |
| 3930.914583                                                     | 3596.038618  | 3967.054345    | 2889.365207         |                    |          |        |
| 3831.335849                                                     | -0.406785258 | 0.018615725    | 0.095464138         |                    |          |        |
| TBC1D16                                                         | 17           | 79932343       | 80035848            | -                  | 11555    |        |
| protein_coding TBC1 domain family member 16 [Source:HGNC        |              |                |                     |                    |          |        |
| Symbol;Acc:HGNC:28356]                                          | -            | 1941           | 2918                | 3802               | 3913     | 3935   |
| 4043                                                            | 9.186504631  | 11.13395074    | 15.2420934          |                    |          |        |
| 16.37348456                                                     | 14.83998236  | 16.33352146    |                     |                    |          |        |
| ENSG00000259589                                                 | 5.784808379  | 9.269511408    | 5.866790497         | 0                  |          |        |
| 0                                                               | 0            | 6.973703428    | 0                   | 5.296023504        |          |        |
| 0.018628882                                                     | 1            | AC073167.1     | 15                  | 63675146           |          |        |
| 63713758                                                        | +            | 580            | antisense           | "novel transcript, |          |        |
| antisense to HERC1"                                             |              |                |                     |                    |          |        |
| 0                                                               | 0.471451176  | 0.760161665    | 0.479209824         | 0                  | 0        |        |
| 0                                                               | 0            |                |                     |                    |          |        |
| ENSG00000235106                                                 | 804.0883646  | 799.0318834    | 807.6614917         |                    |          |        |
| 922.2028078                                                     | 1102.115012  | 1108.773537    | 803.5939133         |                    |          |        |
| 1044.363786                                                     | -0.378259755 | 0.018632286    | 0.095489218         |                    |          | BRD30S |
| 9                                                               | 134025439    | 134034666      | +                   | 5994               |          |        |
| protein_coding BRD3 opposite strand [Source:HGNC                |              |                |                     |                    |          |        |
| Symbol;Acc:HGNC:24742]                                          | -            | 695            | 862                 | 826                | 918      | 1206   |
| 1130                                                            | 6.341073377  | 6.340514283    | 6.383601447         |                    |          |        |
| 7.405035742                                                     | 8.767770368  | 8.800507973    |                     |                    |          |        |
| ENSG00000156467                                                 | 1305.05277   | 1822.385943    | 2112.044579         |                    |          |        |
| 1304.94711                                                      | 1205.381178  | 1384.495098    | 1746.494431         |                    |          |        |
| 1298.274462                                                     | 0.428490365  | 0.018633109    | 0.095489218         |                    |          | UQCRB  |
| 8                                                               | 96225920     | 96235634       | -                   | 9715               |          |        |
| protein_coding ubiquinol-cytochrome c reductase binding protein |              |                |                     |                    |          |        |
| [Source:HGNC Symbol;Acc:HGNC:12582]                             |              |                |                     |                    |          |        |
| 1299                                                            | 1319         | 1411           | 6.34981405          | 8.922255724        |          | 2160   |
| 10.29943502                                                     | 6.464985611  | 5.916441686    | 6.780008599         |                    |          |        |
| ENSG00000228857                                                 | 2.313923351  | 2.780853423    | 1.955596832         |                    |          |        |
| 31.14192488                                                     | 7.310879019  | 12.75580175    | 2.350124535         |                    |          |        |
| 17.06953522                                                     | -2.856719699 | 0.018648605    | 1                   | AC104653.1         |          |        |
| 2                                                               | 113831049    | 113843356      | -                   | 671                |          |        |
| lincRNA novel transcript                                        |              |                |                     |                    |          |        |
| 8                                                               | 13           | 0.163005474    | 0.197120909         | 0.138073372        |          | 31     |
| 2.233779959                                                     | 0.519548463  | 0.904413149    |                     |                    |          |        |

|                                    |                                                       |         |             |     |                |                     |
|------------------------------------|-------------------------------------------------------|---------|-------------|-----|----------------|---------------------|
| ENSG00000112149                    | 240.6480285                                           |         | 221.5413227 |     | 273.7835565    |                     |
| 117.535652                         | 188.2551347                                           |         | 154.0508366 |     | 245.3243026    |                     |
| 153.2805411                        | 0.677388556                                           |         | 0.018669866 |     | 0.095619765    | CD83                |
| 6                                  | 14117256                                              |         | 14136918    |     | + 2515         |                     |
| protein_coding                     | CD83 molecule [Source:HGNC Symbol;Acc:HGNC:1703]      |         |             |     |                |                     |
| -                                  | 208                                                   | 239     | 280         | 117 | 206            | 157                 |
| 4.522931999                        | 4.189805568                                           |         | 5.15730122  |     | 2.249308834    |                     |
| 3.569339258                        | 2.914121794                                           |         |             |     |                |                     |
| ENSG00000188157                    | 3018.513012                                           |         | 2873.548537 |     | 6292.132808    |                     |
| 2069.431137                        | 1715.31499                                            |         | 2376.503988 |     | 4061.398119    |                     |
| 2053.750038                        | 0.983764816                                           |         | 0.018671093 |     | 0.095619765    | AGRN                |
| 1                                  | 1020123                                               | 1056118 | + 10758     |     | protein_coding | agrin               |
| [Source:HGNC Symbol;Acc:HGNC:329]  |                                                       |         | -           |     | 2609           | 3100 6435           |
| 2060                               | 1877                                                  | 2422    | 13.26286203 |     | 12.70469115    |                     |
| 27.7089116                         | 9.258420397                                           |         | 7.603110991 |     | 10.50965923    |                     |
| ENSG00000120647                    | 399.1517781                                           |         | 435.6670362 |     | 480.0990223    |                     |
| 346.5794866                        | 299.7460398                                           |         | 281.6088541 |     | 438.3059456    |                     |
| 309.3114602                        | 0.503628614                                           |         | 0.01869476  |     | 0.095702305    | CCDC77              |
| 12                                 | 389273                                                | 442645  | + 3614      |     | protein_coding |                     |
| coiled-coil domain containing      | 77 [Source:HGNC Symbol;Acc:HGNC:28203]                |         |             |     |                |                     |
| -                                  | 345                                                   | 470     | 491         | 345 | 328            | 287                 |
| 5.220662996                        | 5.733814884                                           |         | 6.293551635 |     | 4.615642497    |                     |
| 3.954980014                        | 3.707146802                                           |         |             |     |                |                     |
| ENSG00000154727                    | 3821.444415                                           |         | 3237.840335 |     | 3088.865197    |                     |
| 2484.321943                        | 2955.422844                                           |         | 2613.958144 |     | 3382.716649    |                     |
| 2684.567643                        | 0.333136932                                           |         | 0.018702484 |     | 0.095702305    | GABPA               |
| 21                                 | 25734570                                              |         | 25772460    |     | + 5429         |                     |
| protein_coding                     | GA binding protein transcription factor subunit alpha |         |             |     |                |                     |
| [Source:HGNC Symbol;Acc:HGNC:4071] |                                                       |         | ETS         |     | 3303           | 3493 3159           |
| 2473                               | 3234                                                  | 2664    | 33.27234762 |     | 28.36695384    |                     |
| 26.95455957                        | 22.02447126                                           |         | 25.95845089 |     | 22.90658853    |                     |
| ENSG00000136937                    | 2628.616927                                           |         | 2190.385546 |     | 2290.003891    |                     |
| 2063.403668                        | 1836.858354                                           |         | 1714.183513 |     | 2369.668788    |                     |
| 1871.481845                        | 0.340250518                                           |         | 0.018705991 |     | 0.095702305    | NCBP1               |
| 9                                  | 97633626                                              |         | 97673748    |     | + 5548         |                     |
| protein_coding                     | nuclear cap binding protein subunit 1 [Source:HGNC    |         |             |     |                |                     |
| Symbol;Acc:HGNC:7658]              |                                                       |         | -           |     | 2272           | 2363 2342 2054 2010 |
| 1747                               | 22.39580036                                           |         | 18.77851421 |     | 19.55477819    |                     |
| 17.90050171                        | 15.78767592                                           |         | 14.69949749 |     |                |                     |
| ENSG00000163191                    | 3644.429279                                           |         | 4079.511971 |     | 3922.927246    |                     |
| 4437.222007                        | 4948.551236                                           |         | 4860.941683 |     | 3882.289498    |                     |
| 4748.904975                        | -0.290575559                                          |         | 0.018714381 |     | 0.095713196    |                     |
| S100A11 1                          | 152032506                                             |         | 152047907   |     | - 680          |                     |
| protein_coding                     | S100 calcium binding protein A11 [Source:HGNC         |         |             |     |                |                     |
| Symbol;Acc:HGNC:10488]             |                                                       |         | -           |     | 3150           | 4401 4012 4417 5415 |
| 4954                               | 253.3356761                                           |         | 285.3490387 |     | 273.3093362    |                     |
| 314.0651175                        | 347.0149186                                           |         | 340.0894231 |     |                |                     |
| ENSG00000182484                    | 211.7239867                                           |         | 266.0349774 |     | 259.1165803    |                     |
| 459.0922475                        | 359.1469318                                           |         | 293.3834403 |     | 245.6251815    |                     |
| 370.5408732                        | -0.591741074                                          |         | 0.018749421 |     | 0.095860335    | WASH6P              |

|                                                 |                                                      |             |                                  |             |                |
|-------------------------------------------------|------------------------------------------------------|-------------|----------------------------------|-------------|----------------|
| X                                               | 156020826                                            | 156025710   | +                                | 4618        |                |
| transcribed_unprocessed_pseudogene              | "WAS protein family homolog 6,                       |             |                                  |             |                |
| pseudogene [Source:HGNC Symbol;Acc:HGNC:31685]" | -                                                    |             |                                  | 183         | 287            |
| 265                                             | 457                                                  | 393         | 299                              | 2.16716448  | 2.740071693    |
| 2.6582413                                       | 4.784796679                                          | 3.708490916 | 3.022479024                      |             |                |
| ENSG00000106346                                 | 868.8782185                                          | 912.1199226 | 886.8631635                      |             |                |
| 1161.292425                                     | 1214.519777                                          | 1048.91939  | 889.2871015                      |             |                |
| 1141.577197                                     | -0.360234495                                         | 0.018783387 | 0.096001885                      |             | USP42          |
| 7                                               | 6104884                                              | 6161564     | +                                | 7072        | protein_coding |
| ubiquitin specific peptidase 42                 | [Source:HGNC Symbol;Acc:HGNC:20068]                  |             |                                  |             |                |
| -                                               | 751                                                  | 984         | 907                              | 1156        | 1329           |
| 5.807542514                                     | 6.134607827                                          | 5.941108597 | 7.903451609                      |             |                |
| 8.189197151                                     | 7.056372342                                          |             |                                  |             |                |
| ENSG00000145725                                 | 2553.414418                                          | 1988.310197 | 2102.266595                      |             |                |
| 1809.245378                                     | 1764.663423                                          | 1648.442073 | 2214.663737                      |             |                |
| 1740.783625                                     | 0.346899191                                          | 0.018811989 | 0.096101292                      |             |                |
| PIIP5K2 5                                       | 103120149                                            | 103212799   | +                                | 17270       |                |
| protein_coding                                  | diphosphoinositol pentakisphosphate kinase 2         |             |                                  |             |                |
| [Source:HGNC Symbol;Acc:HGNC:29035]             | -                                                    |             |                                  | 2207        | 2145           |
| 1801                                            | 1931                                                 | 1680        | 6.988833729                      | 5.476069066 | 2150           |
| 5.766981764                                     | 5.0422293                                            | 4.872462821 | 4.541120017                      |             |                |
| ENSG00000164002                                 | 2.313923351                                          | 8.342560268 | 7.822387329                      |             |                |
| 21.09614266                                     | 24.67421669                                          | 35.3237587  | 6.159623649                      |             |                |
| 27.03137268                                     | -2.118578708                                         | 0.018825603 | 0.096101292                      |             | EX05           |
| 1                                               | 40508741                                             | 40516556    | +                                | 3092        |                |
| protein_coding                                  | exonuclease 5 [Source:HGNC Symbol;Acc:HGNC:26115]    |             |                                  |             |                |
| -                                               | 2                                                    | 9           | 8                                | 21          | 27             |
| 0.035374086                                     | 0.128332597                                          | 0.119854117 | 0.328383272                      |             |                |
| 0.380524721                                     | 0.543511893                                          |             |                                  |             |                |
| ENSG00000166938                                 | 990.3591944                                          | 823.1326131 | 869.262792                       |             |                |
| 695.1681296                                     | 699.1028062                                          | 648.5834584 | 894.2515332                      |             |                |
| 680.9514647                                     | 0.392457105                                          | 0.018827497 | 0.096101292                      |             | DIS3L          |
| 15                                              | 66293217                                             | 66333898    | +                                | 5436        |                |
| protein_coding                                  | DIS3 like exosome 3'-5' exoribonuclease [Source:HGNC |             |                                  |             |                |
| Symbol;Acc:HGNC:28698]                          | -                                                    | 856         | 888                              | 889         | 692            |
| 661                                             | 8.61170272                                           | 7.202238117 | 7.575734897                      |             | 765            |
| 6.154997245                                     | 6.132542757                                          | 5.676335379 |                                  |             |                |
| ENSG00000267311                                 | 2.313923351                                          | 6.488657986 | 12.71137941                      |             | 0              |
| 0                                               | 0                                                    | 7.171320249 | 0                                | 5.33791652  |                |
| 0.018828077                                     | 1                                                    | AC007673.1  | 18                               | 54879457    |                |
| 54880809                                        | +                                                    | 1100        | lincRNA "novel transcript, sense |             |                |
| intronic to RAB27B"                             | -                                                    | 2           | 7                                | 13          | 0              |
| 0                                               | 0.099433339                                          | 0.28056876  | 0.54746092                       |             | 0              |
| 0                                               | 0                                                    |             |                                  |             |                |
| ENSG00000108262                                 | 2462.014446                                          | 3058.938765 | 2785.747688                      |             |                |
| 3231.72814                                      | 3580.503                                             | 3556.906258 | 2768.900299                      |             |                |
| 3456.379133                                     | -0.319663591                                         | 0.018835661 | 0.096101292                      |             | GIT1           |
| 17                                              | 29573469                                             | 29594054    | -                                | 5635        |                |
| protein_coding                                  | GIT ArfGAP 1 [Source:HGNC Symbol;Acc:HGNC:4272]      |             |                                  |             | -              |
| 2128                                            | 3300                                                 | 2849        | 3217                             | 3918        | 3625           |
|                                                 |                                                      |             |                                  |             | 20.65248978    |

|                                                 |                                                   |                |                                    |              |                |
|-------------------------------------------------|---------------------------------------------------|----------------|------------------------------------|--------------|----------------|
|                                                 | 25.81986561                                       | 23.42076005    | 27.60313167                        | 30.29905678  |                |
|                                                 | 30.0303315                                        |                |                                    |              |                |
| ENSG00000104518                                 | 203.6252549                                       | 335.556313     | 466.4098445                        |              |                |
| 239.0896168                                     | 134.337402                                        | 217.8298453    | 335.1971375                        |              |                |
| 197.0856214                                     | 0.768333318                                       | 0.018836302    | 0.096101292                        | GSDMD        |                |
| 8                                               | 143553207                                         | 143563062      | +                                  | 5116         |                |
| protein_coding                                  | gasdermin D [Source:HGNC Symbol;Acc:HGNC:25697] - |                |                                    |              |                |
| 176                                             | 362                                               | 477            | 238                                | 147          | 222            |
|                                                 | 3.119693964                                       | 4.319070559    | 2.249301318                        | 1.881381394  | 1.252118397    |
|                                                 | 2.025668965                                       |                |                                    |              |                |
| ENSG00000135046                                 | 10227.54121                                       | 8538.146958    | 7300.242975                        |              |                |
| 5885.823803                                     | 7588.692422                                       | 6864.583774    | 8688.643716                        | 6779.7       |                |
|                                                 | 0.357754294                                       | 0.018840555    | 0.096101292                        | ANXA1        | 9              |
|                                                 | 73151757                                          | 73170393       | +                                  | 4561         | protein_coding |
|                                                 | annexin A1 [Source:HGNC Symbol;Acc:HGNC:533] -    |                |                                    |              |                |
|                                                 | 9211                                              | 7466           | 5859                               | 8304         | 6996           |
| 89.03908083                                     | 75.82813405                                       | 62.1104452     | 79.33884358                        | 105.9953725  |                |
| 71.60374948                                     |                                                   |                |                                    |              |                |
| ENSG00000083845                                 | 27666.42455                                       | 30616.26923    | 30272.63896                        |              |                |
| 33538.84852                                     | 33346.74693                                       | 43260.81104    | 29518.44425                        |              |                |
| 36715.46883                                     | -0.31475074                                       | 0.018863909    | 0.096157998                        | RPS5         |                |
| 19                                              | 58386400                                          | 58394806       | +                                  | 3617         |                |
| protein_coding                                  | ribosomal protein S5 [Source:HGNC                 |                |                                    |              |                |
| Symbol;Acc:HGNC:10426]                          | -                                                 | 23913          | 33029                              | 30960        | 33386          |
|                                                 | 44089                                             | 361.5599085    | 402.6065853                        | 396.5106887  | 36490          |
| 446.2899394                                     | 439.6265903                                       | 569.0203201    |                                    |              |                |
| ENSG00000253540                                 | 89.08604903                                       | 207.6370555    | 92.89084954                        |              |                |
| 248.1308208                                     | 201.049173                                        | 249.2287419    | 129.871318                         |              |                |
| 232.8029119                                     | -0.83836951                                       | 0.018866128    | 0.096157998                        |              |                |
| FAM86HP 3                                       | 130099092                                         | 130111472      | -                                  | 1301         |                |
| transcribed_unprocessed_pseudogene              | "family with sequence                             |                |                                    |              |                |
| similarity 86 member H, pseudogene [Source:HGNC |                                                   |                |                                    |              |                |
| Symbol;Acc:HGNC:42359]"                         | -                                                 | 77             | 224                                | 95           | 247            |
|                                                 | 254                                               | 3.236742433    | 7.591099426                        | 3.382585357  | 220            |
| 9.17953904                                      | 7.368922381                                       | 9.113862159    |                                    |              |                |
| ENSG00000174326                                 | 0                                                 | 0              | 0                                  | 8.036625776  | 3.65543951     |
|                                                 | 9.812155195                                       | 0              | 7.168073494                        | -5.260510128 |                |
| 0.018868134                                     | 1                                                 | SLC16A11       | 17                                 | 7041630      | 7043923        |
|                                                 | 2041                                              | protein_coding | solute carrier family 16 member 11 |              |                |
|                                                 | [Source:HGNC Symbol;Acc:HGNC:23093]               |                |                                    |              |                |
|                                                 | 8                                                 | 4              | 10                                 | 0            | 0              |
|                                                 | 0.085403483                                       | 0.228719415    | 0                                  | 0            | 0.189517011    |
| ENSG00000153006                                 | 1440.417286                                       | 951.9788217    | 889.7965587                        |              |                |
| 1486.775769                                     | 1688.813053                                       | 1337.396753    | 1094.064222                        |              |                |
| 1504.328525                                     | -0.460518962                                      | 0.018870543    | 0.096157998                        |              |                |
| SREK1IP1                                        | 5                                                 | 64718144       | 64768685                           | -            | 7537           |
| protein_coding                                  | SREK1 interacting protein 1 [Source:HGNC          |                |                                    |              |                |
| Symbol;Acc:HGNC:26716]                          | -                                                 | 1245           | 1027                               | 910          | 1480           |
|                                                 | 1363                                              | 9.033697606    | 6.007667473                        | 5.593006613  | 1848           |
| 9.494332054                                     | 10.68469303                                       | 8.441961679    |                                    |              |                |

|                         |                                                        |             |                                  |             |             |        |
|-------------------------|--------------------------------------------------------|-------------|----------------------------------|-------------|-------------|--------|
| ENSG00000145416         | 170.0733663                                            |             | 177.0476679                      |             | 166.2257307 |        |
| 108.494448              | 104.180026                                             |             | 100.083983                       |             | 171.1155883 |        |
| 104.252819              | 0.715074599                                            |             | 0.018899466                      |             | 0.096243605 | 1-Mar  |
| 4                       | 163524298                                              |             | 164384050                        |             | - 10421     |        |
| protein_coding          | membrane associated ring-CH-type finger 1 [Source:HGNC |             |                                  |             |             |        |
| Symbol;Acc:HGNC:26077]  | -                                                      |             | 147 191                          |             | 170 108     | 114    |
| 102                     | 0.771440884                                            |             | 0.808086645                      |             | 0.755687052 |        |
| 0.501089816             | 0.47670977                                             |             | 0.456916469                      |             |             |        |
| ENSG00000176438         | 864.2503718                                            |             | 879.6766327                      |             | 1385.540356 |        |
| 906.1295563             | 381.0795689                                            |             | 728.0619154                      |             | 1043.155787 |        |
| 671.7570135             | 0.635645212                                            |             | 0.018899935                      |             | 0.096243605 | SYNE3  |
| 14                      | 95407266                                               |             | 95475836                         |             | - 18164     |        |
| protein_coding          | spectrin repeat containing nuclear envelope family     |             |                                  |             |             |        |
| member 3 [Source:HGNC   | Symbol;Acc:HGNC:19861]                                 |             |                                  |             |             |        |
| 1417                    | 902                                                    | 417         | 742                              | 2.249074395 | 2.303502443 | 949    |
| 3.613772534             | 2.401022671                                            |             | 1.000421829                      |             | 1.906946232 |        |
| ENSG00000221962         | 2.313923351                                            |             | 9.269511408                      |             | 9.777984162 | 0      |
| 0                       | 0                                                      | 7.120472974 | 0                                | 5.328159302 |             |        |
| 0.018903363             | 1                                                      | TMEM14EP    | 3                                | 152339695   |             |        |
| 152340990               | -                                                      | 1296        | transcribed_processed_pseudogene |             |             |        |
| Symbol;Acc:HGNC:34386]" | "transmembrane protein 14E, pseudogene [Source:HGNC    |             |                                  |             |             |        |
| 0                       | 0.084395581                                            |             | 2 10                             |             | 10 0        | 0      |
| 0                       | 0                                                      |             | 0.340195807                      |             | 0.357435311 | 0      |
| ENSG00000145414         | 568.0681828                                            |             | 616.4225087                      |             | 537.7891289 |        |
| 867.9555838             | 707.3275451                                            |             | 730.0243465                      |             | 574.0932734 |        |
| 768.4358251             | -0.420207173                                           |             | 0.018908523                      |             | 0.096255276 | NAF1   |
| 4                       | 163110073                                              |             | 163166921                        |             | - 4808      |        |
| protein_coding          | nuclear assembly factor 1 ribonucleoprotein            |             |                                  |             |             |        |
| [Source:HGNC            | Symbol;Acc:HGNC:25126]                                 |             |                                  |             |             |        |
| 864                     | 774                                                    | 744         | 5.584852992                      |             | 6.098052293 | 550    |
| 5.299082565             | 8.688613925                                            |             | 7.015119919                      |             | 7.22361369  |        |
| ENSG00000117280         | 1434.632478                                            |             | 1369.106835                      |             | 1228.114811 |        |
| 1740.934059             | 1803.045538                                            |             | 1567.001185                      |             | 1343.951375 |        |
| 1703.66026              | -0.342476821                                           |             | 0.018950922                      |             | 0.096438997 | RAB29  |
| 1                       | 205767986                                              |             | 205775460                        |             | - 3882      |        |
| protein_coding          | "RAB29, member RAS oncogene family [Source:HGNC        |             |                                  |             |             |        |
| Symbol;Acc:HGNC:9789]"  | -                                                      |             |                                  |             |             |        |
| 1597                    | 17.46871128                                            |             | 1240 1477                        |             | 1256 1733   | 1973   |
| 21.58461209             | 22.1477775                                             |             | 16.77486069                      |             | 14.98775427 |        |
| ENSG00000182324         | 150.4050178                                            |             | 174.2668145                      |             | 181.8705054 |        |
| 391.7855066             | 198.3075934                                            |             | 243.3414488                      |             | 168.8474459 |        |
| 277.8115163             | -0.716753635                                           |             | 0.018959018                      |             | 0.096448091 | KCNJ14 |
| 19                      | 48455509                                               |             | 48466980                         |             | + 4340      |        |
| protein_coding          | potassium voltage-gated channel subfamily J member 14  |             |                                  |             |             |        |
| [Source:HGNC            | Symbol;Acc:HGNC:6260]                                  |             |                                  |             |             |        |
| 390                     | 217                                                    | 248         | 1.638129893                      |             | 1.909862396 | 186    |
| 1.985297842             | 4.34486307                                             |             | 2.178856368                      |             | 2.66752186  |        |
| ENSG00000000419         | 2051.293051                                            |             | 1715.786562                      |             | 1656.390517 |        |
| 1454.629265             | 1433.846148                                            |             | 1381.551451                      |             | 1807.823377 |        |

|                                  |                                                                                                  |             |                      |             |
|----------------------------------|--------------------------------------------------------------------------------------------------|-------------|----------------------|-------------|
| 1423.342288                      | 0.344513428                                                                                      | 0.018999327 | 0.096620995          | DPM1        |
| 20                               | 50934867                                                                                         | 50958555    | -                    | 1207        |
| protein_coding                   | "dolichyl-phosphate mannosyltransferase subunit 1, catalytic [Source:HGNC Symbol;Acc:HGNC:3005]" |             |                      | -           |
| 1694                             | 1448                                                                                             | 1569        | 1408                 | 80.33340555 |
| 65.01425521                      | 58.00460962                                                                                      | 56.64665519 | 54.45545869          | 67.61345157 |
| ENSG00000237550                  | 3511.378686                                                                                      | 4067.461606 | 3569.942017          |             |
| 3662.692197                      | 5442.94943                                                                                       | 5440.840055 | 3716.26077           |             |
| 4848.827228                      | -0.383757948                                                                                     | 0.01901207  | 0.096653646          | RPL9P9      |
| 15                               | 82372196                                                                                         | 82372912    | -                    | 717         |
| transcribed_processed_pseudogene | ribosomal protein L9 pseudogene 9 [Source:HGNC Symbol;Acc:HGNC:17251]                            |             |                      | -           |
| 4388                             | 3651                                                                                             | 3646        | 5956                 | 5545        |
| 269.824525                       | 235.8821801                                                                                      | 245.8661412 | 361.9879645          | 3035        |
| 361.0176465                      |                                                                                                  |             |                      |             |
| ENSG00000124608                  | 644.4276534                                                                                      | 833.3290756 | 630.6799784          |             |
| 934.2577465                      | 891.9272404                                                                                      | 988.0840281 | 702.8122358          |             |
| 938.0896716                      | -0.41578693                                                                                      | 0.019107238 | 0.097105169          | AARS2       |
| 6                                | 44299654                                                                                         | 44313326    | -                    | 4298        |
| protein_coding                   | "alanyl-tRNA synthetase 2, mitochondrial [Source:HGNC Symbol;Acc:HGNC:21022]"                    |             |                      | -           |
| 1007                             | 7.087343739                                                                                      | 9.222045031 | 6.951775831          | 976         |
| 10.46207319                      | 9.895597091                                                                                      | 10.93727408 |                      |             |
| ENSG00000153179                  | 463.941632                                                                                       | 513.530932  | 591.5680418          |             |
| 318.4512964                      | 462.413098                                                                                       | 294.3646558 | 523.0135353          |             |
| 358.4096834                      | 0.544939646                                                                                      | 0.019114281 | 0.097108678          | RASSF3      |
| 12                               | 64507001                                                                                         | 64697567    | +                    | 4226        |
| protein_coding                   | Ras association domain family member 3 [Source:HGNC Symbol;Acc:HGNC:14271]                       |             |                      | -           |
| 300                              | 5.189309728                                                                                      | 5.779818889 | 6.631752927          | 506         |
| 3.626861622                      | 5.217706209                                                                                      | 3.313887782 |                      |             |
| ENSG00000110429                  | 757.8098976                                                                                      | 654.4275054 | 629.70218            |             |
| 442.0144177                      | 562.0238246                                                                                      | 495.5138373 | 680.6465277          |             |
| 499.8506932                      | 0.444390729                                                                                      | 0.019148239 | 0.097248881          | FBX03       |
| 11                               | 33740939                                                                                         | 33774543    | -                    | 12446       |
| protein_coding                   | F-box protein 3 [Source:HGNC Symbol;Acc:HGNC:13582]                                              |             |                      |             |
| -                                | 655                                                                                              | 706         | 644                  | 440         |
| 2.878102231                      | 2.500972189                                                                                      | 2.396947526 | 615                  | 505         |
| 2.153296908                      | 1.894120556                                                                                      |             | 1.709322842          |             |
| ENSG00000230733                  | 726.5719323                                                                                      | 796.25103   | 947.4866653          |             |
| 1200.470975                      | 1003.418145                                                                                      | 1061.675192 | 823.4365425          |             |
| 1088.521438                      | -0.401953885                                                                                     | 0.019169807 | 0.097326085          |             |
| AC092171.2                       | 7                                                                                                | 5475804     | 5479811              | +           |
| transcript                       | -                                                                                                | 628         | 859                  | 969         |
| 10.56421879                      | 11.64957689                                                                                      | 13.80731597 | 1195                 | 1098        |
| 14.71783631                      | 15.53661225                                                                                      |             | 1082                 |             |
| ENSG00000243402                  | 0                                                                                                | 0           | 0.977798416          | 26.11903377 |
| 7.849724156                      | 0.325932805                                                                                      | 11.32291931 | -4.9573739           | 0           |
| 0.019192308                      | 1                                                                                                | AC022973.1  | 8                    | 129864478   |
| 129865052                        | +                                                                                                | 575         | processed_pseudogene |             |

|                                                                   |              |                |             |                      |             |
|-------------------------------------------------------------------|--------------|----------------|-------------|----------------------|-------------|
| ribosomal protein L15 (RPL15) pseudogene                          | -            | 0              | 0           |                      |             |
| 1                                                                 | 26           | 0              | 8           | 0                    | 0.080562811 |
| 2.186284721                                                       | 0            | 0.649483583    |             |                      |             |
| ENSG00000112983                                                   | 806.402288   | 1063.212959    | 1106.867807 |                      |             |
| 761.4702923                                                       | 700.930526   | 768.2917517    | 992.1610179 |                      |             |
| 743.56419                                                         | 0.417031383  | 0.019207054    | 0.097459005 | BRD8                 |             |
| 5                                                                 | 138139766    | 138178986      | -           | 7046                 |             |
| protein_coding bromodomain containing 8 [Source:HGNC              |              |                |             |                      |             |
| Symbol;Acc:HGNC:19874]                                            | -            | 697            | 1147        | 1132                 | 758         |
| 783                                                               | 5.409845372  | 7.177194853    | 7.442284085 |                      | 767         |
| 5.201490184                                                       | 4.743635634  | 5.187584202    |             |                      |             |
| ENSG00000136098                                                   | 207.09614    | 249.3498569    | 194.5818848 |                      |             |
| 149.6821551                                                       | 126.1126631  | 135.4077417    | 217.0092939 |                      |             |
| 137.06752                                                         | 0.663933364  | 0.019208738    | 0.097459005 | NEK3                 |             |
| 13                                                                | 52132639     | 52159861       | -           | 4272                 |             |
| protein_coding NIMA related kinase 3 [Source:HGNC                 |              |                |             |                      |             |
| Symbol;Acc:HGNC:7746]                                             | -            | 179            | 269         | 199                  | 149         |
| 138                                                               | 2.291482262  | 2.77622713     | 2.157865086 |                      | 138         |
| 1.686383098                                                       | 1.407688103  | 1.507974085    |             |                      |             |
| ENSG00000183230                                                   | 10.41265508  | 5.561706845    | 4.888992081 | 0                    |             |
| 0                                                                 | 0            | 6.954451336    | 0           | 5.288350146          |             |
| 0.019270773                                                       | 1            | CTNNA3         | 10          | 65912518             | 67696169    |
| -                                                                 | 11136        | protein_coding | catenin     | alpha 3 [Source:HGNC |             |
| Symbol;Acc:HGNC:2511]                                             | -            | 9              | 6           | 5                    | 0           |
| 0                                                                 | 0.044198548  | 0.023755052    | 0.020799037 | 0                    |             |
| 0                                                                 | 0            |                |             |                      |             |
| ENSG00000162836                                                   | 290.3973806  | 297.5513162    | 281.6059439 |                      |             |
| 355.6206906                                                       | 451.4467794  | 428.791182     | 289.8515469 |                      |             |
| 411.952884                                                        | -0.507453875 | 0.019289463    | 0.097836106 | ACP6                 |             |
| 1                                                                 | 147629652    | 147670496      | -           | 11960                |             |
| protein_coding "acid phosphatase 6, lysophosphatidic [Source:HGNC |              |                |             |                      |             |
| Symbol;Acc:HGNC:29609]"                                           | -            | 251            | 321         | 288                  | 354         |
| 437                                                               | 1.147723449  | 1.183335274    | 1.115485075 |                      | 494         |
| 1.431110931                                                       | 1.799924825  | 1.705675036    |             |                      |             |
| ENSG00000234323                                                   | 12.72657843  | 12.05036483    | 14.66697624 |                      |             |
| 3.013734666                                                       | 0            | 0              | 13.14797317 | 1.004578222          |             |
| 3.734697526                                                       | 0.019336126  | 1              | LINC01505   | 9                    |             |
| 105993310                                                         | 106740875    | +              | 10944       | lincRNA long         |             |
| intergenic non-protein coding RNA 1505 [Source:HGNC               |              |                |             |                      |             |
| Symbol;Acc:HGNC:51186]                                            | -            | 11             | 13          | 15                   | 3           |
| 0                                                                 | 0.054968174  | 0.052372249    | 0.063491799 |                      | 0           |
| 0.013253982                                                       | 0            | 0              |             |                      |             |
| ENSG00000168374                                                   | 7050.524452  | 5900.044011    | 6455.425144 |                      |             |
| 5364.447706                                                       | 5303.128869  | 5241.653305    | 6468.664536 |                      |             |
| 5303.076626                                                       | 0.286498845  | 0.01934205     | 0.098070289 | ARF4                 |             |
| 3                                                                 | 57571363     | 57598220       | -           | 2595                 |             |
| protein_coding ADP ribosylation factor 4 [Source:HGNC             |              |                |             |                      |             |
| Symbol;Acc:HGNC:655]                                              | -            | 6094           | 6365        | 6602                 | 5340        |
| 5342                                                              | 128.428024   | 108.142151     | 117.8529923 |                      | 5803        |
| 99.49588316                                                       | 97.44819654  | 96.09760351    |             |                      |             |

|                        |                                                     |                  |             |        |
|------------------------|-----------------------------------------------------|------------------|-------------|--------|
| ENSG00000088305        | 108.7543975                                         | 158.5086451      | 278.6725486 |        |
| 124.5676995            | 86.81668835                                         | 76.53481052      | 181.9785304 |        |
| 95.97306613            | 0.925203695                                         | 0.019358298      | 0.098120126 | DNMT3B |
| 20                     | 32762385                                            | 32809356         | + 4630      |        |
| protein_coding         | DNA methyltransferase 3 beta [Source:HGNC           |                  |             |        |
| Symbol;Acc:HGNC:2979]  | -                                                   | 94 171           | 285 124     | 95     |
| 78                     | 1.110303159                                         | 1.628354945      | 2.851453704 |        |
| 1.294916935            | 0.894131123                                         | 0.786429231      |             |        |
| ENSG00000128928        | 956.8073058                                         | 1027.988815      | 1181.180487 |        |
| 813.7083598            | 674.4285895                                         | 892.9061227      | 1055.325536 |        |
| 793.681024             | 0.411660456                                         | 0.019396563      | 0.098247432 | IVD    |
| 15                     | 40405795                                            | 40435947         | + 6533      |        |
| protein_coding         | isovaleryl-CoA dehydrogenase [Source:HGNC           |                  |             |        |
| Symbol;Acc:HGNC:6186]  | -                                                   | 827 1109         | 1208 810    | 738    |
| 910                    | 6.922892121                                         | 7.484328582      | 8.565579138 |        |
| 5.99478452             | 4.92268789                                          | 6.50241629       |             |        |
| ENSG00000128578        | 621.2884199                                         | 729.5105478      | 405.7863427 |        |
| 841.8365501            | 892.8411002                                         | 767.3105362      | 585.5284368 |        |
| 833.9960622            | -0.51033818                                         | 0.019399595      | 0.098247432 | STRIP2 |
| 7                      | 129434433                                           | 129488399        | + 5876      |        |
| protein_coding         | striatin interacting protein 2 [Source:HGNC         |                  |             |        |
| Symbol;Acc:HGNC:22209] | -                                                   | 537 787          | 415 838     | 977    |
| 782                    | 4.99789596                                          | 5.905095195      | 3.271664529 |        |
| 6.895463247            | 7.245550276                                         | 6.212565803      |             |        |
| ENSG00000179632        | 2136.908215                                         | 3138.656563      | 2951.973418 |        |
| 3455.749084            | 3349.296451                                         | 3866.970362      | 2742.512732 |        |
| 3557.338632            | -0.374834156                                        | 0.019402695      | 0.098247432 | MAF1   |
| 8                      | 144104499                                           | 144107611        | + 2377      |        |
| protein_coding         | "MAF1 homolog, negative regulator of RNA polymerase |                  |             |        |
| III [Source:HGNC       | Symbol;Acc:HGNC:24966]"                             | -                | 1847 3386   |        |
| 3019                   | 3440 3665                                           | 3941 42.49447093 | 62.80463992 |        |
| 58.83508525            | 69.9729973                                          | 67.18980722      | 77.39685061 |        |
| ENSG00000156509        | 84.45820233                                         | 50.05536161      | 128.0915925 |        |
| 40.18312888            | 30.15737595                                         | 46.11712942      | 87.53505215 |        |
| 38.81921142            | 1.173644233                                         | 0.019433799      | 0.098372344 | FBX043 |
| 8                      | 100133360                                           | 100145800        | - 3950      |        |
| protein_coding         | F-box protein 43 [Source:HGNC                       |                  |             |        |
| Symbol;Acc:HGNC:28521] | -                                                   | 73 54            | 131 40      | 33 47  |
| 1.010695838            | 0.602740844                                         | 1.536302212      | 0.489625595 |        |
| 0.364062077            | 0.555452337                                         |                  |             |        |
| ENSG00000058866        | 409.5644332                                         | 297.5513162      | 280.6281454 |        |
| 509.3211586            | 451.4467794                                         | 457.2464321      | 329.247965  |        |
| 472.6714567            | -0.523452292                                        | 0.019452227      | 0.098423044 | DGKG   |
| 3                      | 186105668                                           | 186362237        | - 10978     |        |
| protein_coding         | diacylglycerol kinase gamma [Source:HGNC            |                  |             |        |
| Symbol;Acc:HGNC:2853]  | -                                                   | 354 321          | 287 507     | 494    |
| 466                    | 1.763497094                                         | 1.289186544      | 1.211047357 |        |
| 2.232985739            | 1.960931036                                         | 1.98156684       |             |        |
| ENSG00000154920        | 437.3315134                                         | 470.8911796      | 552.4561051 |        |
| 433.9777919            | 276.8995429                                         | 279.646423       | 486.8929327 |        |



|                                               |                                                     |             |             |                        |
|-----------------------------------------------|-----------------------------------------------------|-------------|-------------|------------------------|
| 330.1745859                                   | 0.561401834                                         | 0.019456691 | 0.098423044 | EME1                   |
| 17                                            | 50373220                                            | 50381483    | + 3294      |                        |
| protein_coding                                | essential meiotic structure-specific endonuclease 1 |             |             |                        |
| [Source:HGNC Symbol;Acc:HGNC:24965]           | -                                                   | 378         | 508         | 565                    |
| 432                                           | 303                                                 | 285         | 6.275710738 | 6.799454554            |
| 7.945611177                                   | 6.341052786                                         | 4.008460713 | 4.038939064 |                        |
| ENSG00000124920                               | 476.6682104                                         | 469.9642284 | 786.1499266 |                        |
| 403.8404453                                   | 339.0420145                                         | 429.7723975 | 577.5941218 |                        |
| 390.8849524                                   | 0.564027075                                         | 0.01946823  | 0.098448834 | MYRF                   |
| 11                                            | 61752642                                            | 61788518    | + 10680     |                        |
| protein_coding                                | myelin regulatory factor [Source:HGNC               |             |             |                        |
| Symbol;Acc:HGNC:1181]                         | NDT80/PhoG                                          | 412         | 507         | 804 402                |
| 371                                           | 438                                                 | 2.10969987  | 2.093006922 | 3.487283475            |
| 1.819935585                                   | 1.513774742                                         | 1.914471447 |             |                        |
| ENSG00000267260                               | 38.1797353                                          | 94.54901637 | 22.48936357 |                        |
| 232.0575693                                   | 82.24738897                                         | 74.57237948 | 51.73937175 |                        |
| 129.6257792                                   | -1.320815894                                        | 0.0194927   | 0.098539983 |                        |
| AC020928.1                                    | 19                                                  | 36773153    | 36777078    | + 2050                 |
| lincRNA                                       | uncharacterized LOC728485 [Source:NCBI              |             |             |                        |
| gene;Acc:728485]                              | -                                                   | 33          | 102         | 23 231 90              |
| 76                                            | 0.88034883                                          | 2.193715322 | 0.519728378 |                        |
| 5.448278952                                   | 1.913142177                                         | 1.730636134 |             |                        |
| ENSG00000178605                               | 1600.077998                                         | 2146.818842 | 2069.021449 |                        |
| 2606.880486                                   | 2254.492318                                         | 2615.920575 | 1938.639429 |                        |
| 2492.431126                                   | -0.361901609                                        | 0.019502826 | 0.098558578 | GTPBP6                 |
| X                                             | 304529                                              | 318819      | - 2964      | protein_coding GTP     |
| binding protein                               | 6 (putative) [Source:HGNC Symbol;Acc:HGNC:30189]    |             |             |                        |
| -                                             | 1383                                                | 2316        | 2116 2595   | 2467 2666              |
| 25.5175335                                    | 34.45040356                                         | 33.07043594 | 42.33118045 |                        |
| 36.27016639                                   | 41.98827004                                         |             |             |                        |
| ENSG00000134853                               | 503.2783289                                         | 211.3448601 | 386.2303744 |                        |
| 206.9431137                                   | 234.8619885                                         | 233.5292936 | 366.9511878 |                        |
| 225.1114653                                   | 0.703002809                                         | 0.019509972 | 0.098562107 | PDGFRA                 |
| 4                                             | 54229097                                            | 54298247    | + 9732      |                        |
| protein_coding                                | platelet derived growth factor receptor alpha       |             |             |                        |
| [Source:HGNC Symbol;Acc:HGNC:8803]            | -                                                   | 435         | 228         | 395                    |
| 206                                           | 257                                                 | 238         | 2.444454002 | 1.032920043            |
| 1.880171439                                   | 1.023449308                                         | 1.150772886 | 1.141618223 |                        |
| ENSG00000255248                               | 1792.133636                                         | 1574.889988 | 1012.999159 |                        |
| 1829.336942                                   | 2185.952827                                         | 1979.111703 | 1460.007594 |                        |
| 1998.133824                                   | -0.453194567                                        | 0.019537338 | 0.098667752 |                        |
| MIR100HG                                      | 11                                                  | 122028327   | 122556721   | - 19385                |
| processed_transcript                          | mir-100-let-7a-2-mir-125b-1 cluster                 |             |             |                        |
| host gene [Source:HGNC Symbol;Acc:HGNC:39522] | -                                                   | 1549        | 1699        |                        |
| 1036                                          | 1821                                                | 2392        | 2017        | 4.369988813 3.86421722 |
| 2.475690818                                   | 4.541981458                                         | 5.377172485 | 4.857201592 |                        |
| ENSG00000131469                               | 8311.612678                                         | 14105.41551 | 12631.19994 |                        |
| 13340.79879                                   | 14569.66803                                         | 19567.39989 | 11682.74271 |                        |
| 15825.95557                                   | -0.437810798                                        | 0.01956206  | 0.098710925 | RPL27                  |
| 17                                            | 42998273                                            | 43002959    | + 2026      |                        |

|                                              |                                                     |             |             |             |                |             |  |
|----------------------------------------------|-----------------------------------------------------|-------------|-------------|-------------|----------------|-------------|--|
| protein_coding                               | ribosomal protein L27 [Source:HGNC                  |             |             |             |                |             |  |
| Symbol;Acc:HGNC:10328]                       | -                                                   | 7184        | 15217       | 12918       | 13280          | 15943       |  |
| 19942                                        | 193.9195503                                         | 331.1490836 |             | 295.3644993 |                |             |  |
| 316.9274458                                  | 342.9171478                                         | 459.4891986 |             |             |                |             |  |
| ENSG00000165934                              | 2391.439784                                         | 2209.85152  |             | 2165.823492 |                |             |  |
| 1869.520071                                  | 1903.570125                                         | 1648.442073 |             | 2255.704932 |                |             |  |
| 1807.177423                                  | 0.319598566                                         | 0.019562398 |             | 0.098710925 |                | CPSF2       |  |
| 14                                           | 92121937                                            | 92172145    |             | +           | 13595          |             |  |
| protein_coding                               | cleavage and polyadenylation specific factor 2      |             |             |             |                |             |  |
| [Source:HGNC Symbol;Acc:HGNC:2325]           | -                                                   |             |             | 2067        | 2384           | 2215        |  |
| 1861                                         | 2083                                                | 1680        | 8.314879838 | 7.73145081  |                |             |  |
| 7.547393169                                  | 6.618634179                                         | 6.676804434 |             | 5.768675446 |                |             |  |
| ENSG00000111832                              | 1342.075544                                         | 893.5808998 |             | 962.1536415 |                |             |  |
| 453.0647781                                  | 951.3281324                                         | 742.7801482 |             | 1065.936695 |                |             |  |
| 715.7243529                                  | 0.573604046                                         | 0.019565258 |             | 0.098710925 |                | RWDD1       |  |
| 6                                            | 116571367                                           | 116597675   |             | +           | 5909           |             |  |
| protein_coding                               | RWD domain containing 1 [Source:HGNC                |             |             |             |                |             |  |
| Symbol;Acc:HGNC:20993]                       | -                                                   | 1160        | 964         | 984         | 451            | 1041        |  |
| 757                                          | 10.73590629                                         | 7.192783723 |             | 7.714069801 |                |             |  |
| 3.690317803                                  | 7.677067114                                         | 5.980368225 |             |             |                |             |  |
| ENSG00000261596                              | 0                                                   | 3.707804563 |             | 0.977798416 | 25.11445555    |             |  |
| 9.138598774                                  | 11.77458623                                         | 1.56186766  |             | 15.34254685 |                |             |  |
| -3.252002859                                 | 0.019689352                                         | 1           |             | AC005632.2  | 16             |             |  |
| 21626742                                     | 21627569                                            | +           |             | 828         | sense_intronic |             |  |
| "novel transcript, sense intronic to METTL9" |                                                     |             |             | -           | 0              |             |  |
| 4                                            | 1                                                   | 25          | 10          | 12          | 0              | 0.212992157 |  |
| 0.055946397                                  | 1.459858922                                         | 0.526293809 |             | 0.676545399 |                |             |  |
| ENSG00000159167                              | 2869.264956                                         | 3414.888003 |             | 1613.367387 |                |             |  |
| 3759.131707                                  | 6274.561918                                         | 4347.765967 |             | 2632.506782 |                |             |  |
| 4793.819864                                  | -0.864767125                                        | 0.019692865 |             | 0.099298197 |                | STC1        |  |
| 8                                            | 23841915                                            | 23854807    |             | -           | 4149           |             |  |
| protein_coding                               | stanniocalcin 1 [Source:HGNC Symbol;Acc:HGNC:11373] |             |             |             |                |             |  |
| -                                            | 2480                                                | 3684        | 1650        | 3742        | 6866           | 4431        |  |
| 32.68909963                                  | 39.14805093                                         | 18.42226245 |             | 43.60753769 |                |             |  |
| 72.11389646                                  | 49.8544984                                          |             |             |             |                |             |  |
| ENSG00000105722                              | 976.4756543                                         | 1949.378249 |             | 1948.752243 |                |             |  |
| 2299.47955                                   | 2264.544776                                         | 2326.461997 |             | 1624.868716 |                |             |  |
| 2296.828774                                  | -0.498584288                                        | 0.019694651 |             | 0.099298197 |                | ERF         |  |
| 19                                           | 42247572                                            | 42255157    |             | -           | 3295           |             |  |
| protein_coding                               | ETS2 repressor factor [Source:HGNC                  |             |             |             |                |             |  |
| Symbol;Acc:HGNC:3444]                        | ETS                                                 | 844         | 2103        | 1993        | 2289           | 2478        |  |
| 2371                                         | 14.00818086                                         | 28.139593   |             | 28.01910996 |                |             |  |
| 33.58857585                                  | 32.77211581                                         | 33.59094106 |             |             |                |             |  |
| ENSG00000265496                              | 2.313923351                                         | 12.05036483 |             | 6.844588913 |                | 0           |  |
| 0                                            | 0                                                   | 7.069625699 |             | 0           | 5.318285034    |             |  |
| 0.019699335                                  | 1                                                   | AC100778.3  |             | 18          | 49487339       |             |  |
| 49491878                                     | +                                                   | 582         | antisense   |             | microRNA 1539  | -           |  |
| 2                                            | 13                                                  | 7           | 0           | 0           | 0              | 0.187932428 |  |
| 0.984814253                                  | 0.557156897                                         | 0           |             | 0           | 0              |             |  |
| ENSG00000262777                              | 10.41265508                                         | 6.488657986 |             | 3.911193665 |                | 0           |  |

|                        |                                                  |             |             |                                      |        |
|------------------------|--------------------------------------------------|-------------|-------------|--------------------------------------|--------|
| 0                      | 0                                                | 6.937502244 | 0           | 5.28500083                           |        |
| 0.019701118            | 1                                                | AC032044.1  | 17          | 1424473 1426484 +                    |        |
| 691                    |                                                  | antisense   |             | "novel transcript, antisense to CRK" |        |
| -                      | 9                                                | 7           | 4           | 0                                    | 0      |
| 0.712293817            | 0.446636232                                      |             | 0.268154074 | 0                                    | 0      |
| ENSG00000170889        | 12120.33051                                      |             | 14210.16099 | 13456.4618                           |        |
| 14613.5994             | 15485.35562                                      |             | 20085.48168 | 13262.31777                          |        |
| 16728.14557            | -0.334894339                                     |             | 0.019750063 | 0.099544744                          | RPS9   |
| 19                     | 54200742                                         |             | 54249003    | + 4371                               |        |
| protein_coding         | ribosomal protein S9 [Source:HGNC                |             |             |                                      |        |
| Symbol;Acc:HGNC:10442] | -                                                | 10476       | 15330       | 13762 14547                          | 16945  |
| 20470                  | 131.07184                                        |             | 154.630552  | 145.8489151                          |        |
| 160.9140067            | 168.9348943                                      |             | 218.6165679 |                                      |        |
| ENSG00000265681        | 214.03791                                        |             | 329.067655  | 307.0287027                          |        |
| 478.1792337            | 377.4241294                                      |             | 402.298363  | 283.3780892                          |        |
| 419.3005753            | -0.562924539                                     |             | 0.019764418 | 0.099569843                          | RPL17  |
| 18                     | 49488453                                         |             | 49492523    | - 2466                               |        |
| protein_coding         | ribosomal protein L17 [Source:HGNC               |             |             |                                      |        |
| Symbol;Acc:HGNC:10307] | -                                                | 185         | 355         | 314 476                              | 413    |
| 410                    | 4.102734079                                      |             | 6.347010821 | 5.898465337                          |        |
| 9.332867432            | 7.298196917                                      |             | 7.76134199  |                                      |        |
| ENSG00000132801        | 165.4455196                                      |             | 200.2214464 | 143.7363672                          |        |
| 367.6756293            | 243.0867274                                      |             | 212.9237677 | 169.8011111                          |        |
| 274.5620415            | -0.692245286                                     |             | 0.019768069 | 0.099569843                          | ZSWIM3 |
| 20                     | 45857617                                         |             | 45879122    | + 2773                               |        |
| protein_coding         | zinc finger SWIM-type containing 3 [Source:HGNC  |             |             |                                      |        |
| Symbol;Acc:HGNC:16157] | -                                                | 143         | 216         | 147 366                              | 266    |
| 217                    | 2.820206314                                      |             | 3.434296913 | 2.455669527                          |        |
| 6.381641926            | 4.180135549                                      |             | 3.653052385 |                                      |        |
| ENSG00000156795        | 639.7998067                                      |             | 608.0799484 | 464.4542477                          |        |
| 403.8404453            | 398.4429066                                      |             | 429.7723975 | 570.7780009                          |        |
| 410.6852498            | 0.474441232                                      |             | 0.019792989 | 0.099662523                          | WDYHV1 |
| 8                      | 123416725                                        |             | 123470028   | + 4930                               |        |
| protein_coding         | WDYHV motif containing 1 [Source:HGNC            |             |             |                                      |        |
| Symbol;Acc:HGNC:25490] | -                                                | 553         | 656         | 475 402                              | 436    |
| 438                    | 6.134411774                                      |             | 5.866659439 | 4.463228752                          |        |
| 3.94257851             | 3.853879823                                      |             | 4.147374251 |                                      |        |
| ENSG00000188501        | 133.0505927                                      |             | 72.30218899 | 72.3570828                           |        |
| 66.30216265            | 16.44947779                                      |             | 30.4176811  | 92.56995483                          |        |
| 37.72310718            | 1.296035992                                      |             | 0.019823493 | 0.099751995                          | LCTL   |
| 15                     | 66547179                                         |             | 66565979    | - 3518                               |        |
| protein_coding         | lactase like [Source:HGNC Symbol;Acc:HGNC:15583] |             |             |                                      |        |
| -                      | 115 78                                           | 74          | 66          | 18 31                                |        |
| 1.787708553            | 0.977535922                                      |             | 0.97440239  | 0.907087781                          |        |
| 0.222964267            | 0.411350372                                      |             |             |                                      |        |
| ENSG00000009830        | 864.2503718                                      |             | 795.3240788 | 966.0648352                          |        |
| 695.1681296            | 604.9752388                                      |             | 689.7945102 | 875.2130953                          |        |
| 663.3126262            | 0.400120682                                      |             | 0.019833511 | 0.099751995                          | POMT2  |
| 14                     | 77274956                                         |             | 77320884    | - 10008                              |        |
| protein_coding         | protein O-mannosyltransferase 2 [Source:HGNC     |             |             |                                      |        |

|                        |                                                |             |      |             |      |        |
|------------------------|------------------------------------------------|-------------|------|-------------|------|--------|
| Symbol;Acc:HGNC:19743] | -                                              | 747         | 858  | 988         | 692  | 662    |
| 703                    | 4.081953169                                    | 3.779844635 |      | 4.5731148   |      |        |
| 3.343181957            | 2.882499831                                    | 3.279095492 |      |             |      |        |
| ENSG00000060138        | 4659.084668                                    | 5106.573835 |      | 4275.912474 |      |        |
| 5344.356141            | 5745.437049                                    | 6215.0191   |      | 4680.523659 |      |        |
| 5768.270764            | -0.301432688                                   | 0.019835465 |      | 0.099751995 |      | YBX3   |
| 12                     | 10699089                                       | 10723312    |      | -           | 8610 |        |
| protein_coding         | Y-box binding protein 3 [Source:HGNC           |             |      |             |      |        |
| Symbol;Acc:HGNC:2428]  | CSD                                            | 4027        | 5509 | 4373        | 5320 | 6287   |
| 6334                   | 25.57838918                                    | 28.21003201 |      | 23.5276625  |      |        |
| 29.87512268            | 31.81990705                                    | 34.34163306 |      |             |      |        |
| ENSG00000247271        | 60.16200714                                    | 70.4482867  |      | 76.26827646 |      |        |
| 36.16481599            | 21.93263706                                    | 33.36132766 |      | 68.95952343 |      |        |
| 30.48626024            | 1.180433289                                    | 0.019836859 |      | 0.099751995 |      | ZBED5- |
| AS1                    | 11                                             | 10858259    |      | 10906802    | +    | 1995   |
| antisense              | ZBED5 antisense RNA 1 [Source:HGNC             |             |      |             |      |        |
| Symbol;Acc:HGNC:48646] | -                                              | 52          | 76   | 78          | 36   | 24     |
| 34                     | 1.425460398                                    | 1.679595298 |      | 1.811148908 |      |        |
| 0.872490722            | 0.524236119                                    | 0.795576695 |      |             |      |        |
| ENSG00000085185        | 245.2758753                                    | 337.4102153 |      | 391.1193665 |      |        |
| 495.2570635            | 382.9072886                                    | 573.0298634 |      | 324.601819  |      |        |
| 483.7314052            | -0.573678088                                   | 0.019851968 |      | 0.099795142 |      | BCORL1 |
| X                      | 129981107                                      | 130058083   |      | +           | 7996 |        |
| protein_coding         | BCL6 corepressor like 1 [Source:HGNC           |             |      |             |      |        |
| Symbol;Acc:HGNC:25657] | -                                              | 212         | 364  | 400         | 493  | 419    |
| 584                    | 1.449965898                                    | 2.007070169 |      | 2.317339485 |      |        |
| 2.981091803            | 2.283493792                                    | 3.409463908 |      |             |      |        |
| ENSG00000109689        | 389.8960847                                    | 411.5663065 |      | 368.6300029 |      |        |
| 669.0490959            | 522.7278499                                    | 457.2464321 |      | 390.030798  |      |        |
| 549.6744593            | -0.494652913                                   | 0.01987111  |      | 0.099858534 |      | STIM2  |
| 4                      | 26857678                                       | 27025381    |      | +           | 6909 |        |
| protein_coding         | stromal interaction molecule 2 [Source:HGNC    |             |      |             |      |        |
| Symbol;Acc:HGNC:19205] | -                                              | 337         | 444  | 377         | 666  | 572    |
| 466                    | 2.667530667                                    | 2.83335985  |      | 2.527717955 |      |        |
| 4.6607977              | 3.607774909                                    | 3.148594698 |      |             |      |        |
| ENSG00000089127        | 19.66834849                                    | 26.88158308 |      | 9.777984162 |      |        |
| 27.12361199            | 87.73054823                                    | 51.02320701 |      | 18.77597191 |      |        |
| 55.29245575            | -1.558610534                                   | 0.020032173 |      | 0.100634842 |      | OAS1   |
| 12                     | 112906777                                      | 112933222   |      | +           | 4947 |        |
| protein_coding         | 2'-5'-oligoadenylate synthetase 1 [Source:HGNC |             |      |             |      |        |
| Symbol;Acc:HGNC:8086]  | -                                              | 17          | 29   | 10          | 27   | 96     |
| 52                     | 0.187932428                                    | 0.258458039 |      | 0.093639815 |      |        |
| 0.263890083            | 0.845644679                                    | 0.490690296 |      |             |      |        |
| ENSG00000092470        | 1293.483153                                    | 1224.502457 |      | 1092.200831 |      |        |
| 737.360415             | 1044.54184                                     | 935.0983901 |      | 1203.39548  |      |        |
| 905.6668816            | 0.409487201                                    | 0.020047506 |      | 0.100670355 |      | WDR76  |
| 15                     | 43826963                                       | 43868419    |      | +           | 4078 |        |
| protein_coding         | WD repeat domain 76 [Source:HGNC               |             |      |             |      |        |
| Symbol;Acc:HGNC:25773] | -                                              | 1118        | 1321 | 1117        | 734  | 1143   |
| 953                    | 14.99302603                                    | 14.28201728 |      | 12.68844517 |      |        |

|                                     |                                                |                          |             |           |  |  |  |
|-------------------------------------|------------------------------------------------|--------------------------|-------------|-----------|--|--|--|
| 8.702620691                         | 12.21399131                                    | 10.90917014              |             |           |  |  |  |
| ENSG00000181915                     | 1256.46038                                     | 1243.04148               | 1051.133297 |           |  |  |  |
| 1460.656735                         | 1643.12006                                     | 1434.537089              | 1183.545052 |           |  |  |  |
| 1512.771295                         | -0.3544087                                     | 0.020053295              | 0.100670355 | ADO       |  |  |  |
| 10                                  | 62804857                                       | 62808483                 | + 3627      |           |  |  |  |
| protein_coding                      | 2-aminoethanethiol dioxygenase [Source:HGNC    |                          |             |           |  |  |  |
| Symbol;Acc:HGNC:23506]              | -                                              | 1086 1341                | 1075 1454   | 1798      |  |  |  |
| 1462                                | 16.37483688                                    | 16.30103501              | 13.72977324 |           |  |  |  |
| 19.38286931                         | 21.60233664                                    | 18.81680364              |             |           |  |  |  |
| ENSG00000244398                     | 2026.996856                                    | 1673.146809              | 1955.596832 |           |  |  |  |
| 2140.756191                         | 2570.687835                                    | 2436.358135              | 1885.246832 |           |  |  |  |
| 2382.60072                          | -0.338205639                                   | 0.020058998              | 0.100670355 |           |  |  |  |
| AC116533.1                          | 11 16974693                                    | 16975013                 | -           | 321       |  |  |  |
| processed_pseudogene                | ribosomal protein L36a (RPL36A)                |                          |             |           |  |  |  |
| pseudogene                          | -                                              | 1752 1805 2000 2131 2813 | 2483        |           |  |  |  |
| 298.4858736                         | 247.9168995                                    | 288.6206624              | 320.9812277 |           |  |  |  |
| 381.8768201                         | 361.0918805                                    |                          |             |           |  |  |  |
| ENSG00000157796                     | 726.5719323                                    | 788.8354209              | 597.4348323 |           |  |  |  |
| 512.3348932                         | 524.5555696                                    | 529.8563805              | 704.2807285 |           |  |  |  |
| 522.2489478                         | 0.431399731                                    | 0.020099985              | 0.100815006 | WDR19     |  |  |  |
| 4                                   | 39182404                                       | 39285810                 | + 8873      |           |  |  |  |
| protein_coding                      | WD repeat domain 19 [Source:HGNC               |                          |             |           |  |  |  |
| Symbol;Acc:HGNC:18340]              | -                                              | 628 851                  | 611 510     | 574       |  |  |  |
| 540                                 | 3.870649755                                    | 4.228565251              | 3.189871472 |           |  |  |  |
| 2.779079119                         | 2.819032019                                    | 2.840987443              |             |           |  |  |  |
| ENSG00000198838                     | 108.7543975                                    | 57.47097073              | 81.15726854 |           |  |  |  |
| 58.26553688                         | 12.79403828                                    | 25.51160351              | 82.46087893 |           |  |  |  |
| 32.19039289                         | 1.358797867                                    | 0.02010101               | 0.100815006 | RYR3      |  |  |  |
| 15                                  | 33310945                                       | 33866121                 | + 20370     |           |  |  |  |
| protein_coding                      | ryanodine receptor 3 [Source:HGNC              |                          |             |           |  |  |  |
| Symbol;Acc:HGNC:10485]              | -                                              | 94 62                    | 83 58       | 14        |  |  |  |
| 26                                  | 0.252366403                                    | 0.13419447               | 0.188751112 |           |  |  |  |
| 0.137669641                         | 0.029949916                                    | 0.059583822              |             |           |  |  |  |
| ENSG00000145723                     | 232.5492968                                    | 189.0980327              | 131.0249878 |           |  |  |  |
| 73.33421021                         | 114.2324847                                    | 124.614371               | 184.2241058 |           |  |  |  |
| 104.0603553                         | 0.822021352                                    | 0.020117499              | 0.100864616 | GIN1      |  |  |  |
| 5                                   | 103086000                                      | 103120151                | - 4182      |           |  |  |  |
| protein_coding                      | gypsy retrotransposon integrase 1 [Source:HGNC |                          |             |           |  |  |  |
| Symbol;Acc:HGNC:25959]              | -                                              | 201 204                  | 134 73      | 125       |  |  |  |
| 127                                 | 2.628492497                                    | 2.150701297              | 1.484305257 |           |  |  |  |
| 0.843995339                         | 1.302520545                                    | 1.417639248              |             |           |  |  |  |
| ENSG00000228775                     | 0 0                                            | 0 0                      | 5.483159264 |           |  |  |  |
| 20.60552591                         | 0 8.696228391                                  | -5.540178405             | 0.0201406   |           |  |  |  |
| 1                                   | WEE2-AS1                                       | 7                        | 141704338   | 141738346 |  |  |  |
| -                                   | 3504 antisense                                 | WEE2 antisense RNA 1     |             |           |  |  |  |
| [Source:HGNC Symbol;Acc:HGNC:48669] | -                                              | 0 0                      | 0           | 0         |  |  |  |
| 0                                   | 6 21                                           | 0 0                      | 0 0         |           |  |  |  |
| 0.074618369                         | 0.279770058                                    |                          |             |           |  |  |  |
| ENSG00000236274                     | 8.09873173                                     | 6.488657986              | 5.866790497 | 0         |  |  |  |
| 0                                   | 0 6.818060071                                  | 0                        | 5.261349058 |           |  |  |  |

|                                     |                                                           |             |                      |             |             |                |
|-------------------------------------|-----------------------------------------------------------|-------------|----------------------|-------------|-------------|----------------|
| 0.020171891                         | 1                                                         | AC004865.1  | 1                    | 35509742    |             |                |
| 35511438                            | +                                                         | 1003        | processed_pseudogene | zinc finger |             |                |
| protein_pseudogene                  | -                                                         | 7           | 7                    | 6           | 0           | 0              |
| 0                                   | 0.381673335                                               | 0.307702528 | 0.277110367          | 0           |             |                |
| 0                                   | 0                                                         |             |                      |             |             |                |
| ENSG00000285692                     | 9.255693406                                               | 0.926951141 | 11.73358099          | 0           |             |                |
| 0                                   | 0                                                         | 7.305408514 | 0                    | 5.359771455 |             |                |
| 0.020172072                         | 1                                                         | AC023509.6  | 12                   | 53531752    |             |                |
| 53621218                            | +                                                         | 867         | antisense            | -           |             | 8              |
| 1                                   | 12                                                        | 0           | 0                    | 0           | 0.504621328 |                |
| 0.050852799                         | 0.641157319                                               | 0           | 0                    | 0           |             |                |
| ENSG00000174574                     | 1544.543837                                               | 1556.350965 | 1566.433063          |             |             |                |
| 1925.776452                         | 2051.615425                                               | 1821.136004 | 1555.775955          |             |             |                |
| 1932.842627                         | -0.313140139                                              | 0.020189458 | 0.101185862          |             |             |                |
| AKIRIN1                             | 1                                                         | 38991223    | 39006059             | +           | 2741        |                |
| protein_coding                      | akirin 1 [Source:HGNC Symbol;Acc:HGNC:25744]              |             |                      |             |             | -              |
| 1335                                | 1679                                                      | 1602        | 1917                 | 2245        | 1856        | 26.63587345    |
| 27.00695486                         | 27.07421865                                               | 33.81538169 | 35.69159099          |             |             |                |
| 31.60930683                         |                                                           |             |                      |             |             |                |
| ENSG00000172809                     | 4993.446592                                               | 4211.139033 | 4343.380565          |             |             |                |
| 4683.343671                         | 5936.433764                                               | 6674.227963 | 4515.98873           |             |             |                |
| 5764.668466                         | -0.352371374                                              | 0.02019481  | 0.101185862          |             |             | RPL38          |
| 17                                  | 74203582                                                  | 74210655    | +                    | 3829        |             |                |
| protein_coding                      | ribosomal protein L38 [Source:HGNC Symbol;Acc:HGNC:10349] |             |                      |             |             |                |
| 6802                                | 61.64399583                                               | 52.31079598 | 53.73975024          |             |             | 6496           |
| 58.86919801                         | 73.92975171                                               | 82.92725637 |                      |             |             |                |
| ENSG00000166402                     | 499.8074439                                               | 446.7904499 | 549.5227099          |             |             |                |
| 419.9136968                         | 355.4914923                                               | 232.5480781 | 498.7068679          |             |             |                |
| 335.9844224                         | 0.569730926                                               | 0.020219651 | 0.101277132          |             |             | TUB            |
| 11                                  | 8019244                                                   | 8106112     | +                    | 6722        |             | protein_coding |
| bipartite transcription factor      | [Source:HGNC Symbol;Acc:HGNC:12406]                       |             |                      |             |             | tubby          |
| Tub                                 | 432                                                       | 482         | 562                  | 418         | 389         | 237            |
| 3.514632749                         | 3.161422123                                               | 3.872935491 | 3.006623102          |             |             |                |
| 2.521794487                         | 1.645871306                                               |             |                      |             |             |                |
| ENSG00000147454                     | 3016.199089                                               | 2752.117937 | 3217.934588          |             |             |                |
| 2647.063615                         | 2157.623171                                               | 2373.560342 | 2995.417204          |             |             |                |
| 2392.749042                         | 0.324156063                                               | 0.020253533 | 0.101413611          |             |             |                |
| SLC25A37                            | 8                                                         | 23528805    | 23575463             | +           |             | 8147           |
| protein_coding                      | solute carrier family 25 member 37                        |             |                      |             |             |                |
| [Source:HGNC Symbol;Acc:HGNC:29786] |                                                           |             |                      |             | 2607        | 2969           |
| 2635                                | 2361                                                      | 2419        | 17.49999915          | 16.06743084 |             | 3291           |
| 18.71253483                         | 15.63810482                                               | 12.6286483  | 13.86066885          |             |             |                |
| ENSG00000164742                     | 52.06327541                                               | 71.37523785 | 54.75671131          |             |             |                |
| 124.5676995                         | 124.2849433                                               | 89.29061227 | 59.39840819          |             |             |                |
| 112.7144184                         | -0.92214205                                               | 0.020275902 | 0.101492375          |             |             | ADCY1          |
| 7                                   | 45574140                                                  | 45723116    | +                    | 13812       |             |                |
| protein_coding                      | adenylate cyclase 1 [Source:HGNC Symbol;Acc:HGNC:232]     |             |                      |             |             |                |
| -                                   | 45                                                        | 77          | 56                   | 124         | 136         | 91             |
| 0.178176596                         | 0.245792209                                               | 0.187816574 | 0.434076557          |             |             |                |

|                                     |                                                 |             |             |                      |             |                |       |
|-------------------------------------|-------------------------------------------------|-------------|-------------|----------------------|-------------|----------------|-------|
| 0.429082633                         | 0.307560713                                     |             |             |                      |             |                |       |
| ENSG00000258944                     | 0                                               | 0.926951141 | 0           | 17.07782977          |             |                |       |
| 15.53561792                         | 0                                               | 0.308983714 | 10.87114923 | -4.900772607         |             |                |       |
|                                     | 0.020295708                                     | 1           | AC004846.2  | 14                   | 73272182    |                |       |
|                                     | 73274081                                        | -           | 777         | antisense            | "novel      |                |       |
| transcript, antisense to PAPLN"     |                                                 |             |             |                      |             |                |       |
|                                     | 17                                              | 0           | 0           | 0.056743084          | 0           | 1.057862249    |       |
|                                     | 0.953424923                                     | 0           |             |                      |             |                |       |
| ENSG00000101040                     | 1858.080451                                     |             | 1827.020699 | 2428.851266          |             |                |       |
| 1579.196965                         | 1636.72304                                      |             | 1547.376874 | 2037.984139          |             |                |       |
| 1587.765627                         | 0.360249304                                     |             | 0.020312643 | 0.101643             |             | ZMYND8         |       |
|                                     | 20                                              | 47209214    | 47356889    | -                    | 7625        |                |       |
| protein_coding                      | zinc finger MYND-type containing 8 [Source:HGNC |             |             |                      |             |                |       |
| Symbol;Acc:HGNC:9397]               | -                                               | 1606        | 1971        | 2484                 | 1572        | 1791           |       |
|                                     | 1577                                            | 11.51861879 | 11.39674246 | 15.09086727          |             |                |       |
| 9.968134979                         | 10.23562427                                     |             | 9.65467994  |                      |             |                |       |
| ENSG00000224855                     | 8.09873173                                      |             | 3.707804563 | 8.800185745          | 0           |                |       |
|                                     | 0                                               | 6.868907346 | 0           | 5.271592075          |             |                |       |
| 0.020330098                         | 1                                               | OPA1-AS1    | 3           | 193618609            |             |                |       |
| 193627337                           | -                                               | 497         | antisense   | OPA1 antisense RNA 1 |             |                |       |
| [Source:HGNC Symbol;Acc:HGNC:40421] |                                                 |             |             |                      |             |                |       |
|                                     | 0                                               | 0           | 0           | 0.77025826           | 0.354844077 |                |       |
| 0.838858243                         | 0                                               | 0           | 0           |                      |             |                |       |
| ENSG00000130803                     | 1148.862944                                     |             | 1142.003806 | 1048.199902          |             |                |       |
| 1556.091666                         | 1436.587727                                     |             | 1271.655313 | 1113.022217          |             |                |       |
| 1421.444902                         | -0.352958839                                    |             | 0.020330154 | 0.101697336          |             | ZNF317         |       |
|                                     | 19                                              | 9140380     | 9163424     | +                    | 5065        | protein_coding | zinc  |
| finger protein 317 [Source:HGNC     |                                                 |             |             |                      |             | zf-C2H2        | 993   |
| Symbol;Acc:HGNC:13507]              |                                                 |             |             |                      |             |                |       |
|                                     | 1232                                            | 1072        | 1549        | 1572                 | 1296        | 10.72172124    |       |
| 10.72420769                         | 9.804327085                                     |             | 14.78676547 | 13.5248261           |             |                |       |
| 11.94459937                         |                                                 |             |             |                      |             |                |       |
| ENSG00000267365                     | 8.09873173                                      |             | 18.53902282 | 9.777984162          |             |                |       |
| 2.009156444                         | 0                                               | 0.981215519 | 12.13857957 | 0.996790655          |             |                |       |
|                                     | 3.629153907                                     | 0.020362455 | 1           | KCNJ2-AS1            | 17          |                |       |
|                                     | 70166961                                        | 70169402    | -           | 2442                 | antisense   |                |       |
|                                     | KCNJ2 antisense RNA 1 [Source:HGNC              |             |             |                      |             |                |       |
|                                     | Symbol;Acc:HGNC:43720]                          |             |             |                      |             |                |       |
|                                     | -                                               | 7           | 20          | 10                   | 2           | 0              | 1     |
| 0.156764273                         | 0.361092355                                     |             | 0.189695398 | 0.039599122          | 0           |                |       |
|                                     | 0.019116148                                     |             |             |                      |             |                |       |
| ENSG00000263884                     | 0                                               | 0           | 3.911193665 | 26.11903377          |             |                |       |
| 11.88017841                         | 7.849724156                                     |             | 1.303731222 |                      |             |                |       |
| 15.28297878                         | -3.529132934                                    |             | 0.020365315 | 1                    | AP000845.1  |                |       |
|                                     | 18                                              | 268148      | 270278      | +                    | 2131        | lincRNA        | novel |
| transcript                          |                                                 |             |             |                      |             |                |       |
|                                     | -                                               | 0           | 0           | 4                    | 26          | 13             | 8     |
|                                     | 0                                               | 0           | 0.086951884 | 0.589917276          | 0.265838881 |                |       |
|                                     | 0.175247799                                     |             |             |                      |             |                |       |
| ENSG00000156427                     | 21.98227184                                     |             | 12.97731597 | 8.800185745          | 0           |                |       |
|                                     | 3.65543951                                      | 0           | 14.58659119 | 1.218479837          |             |                |       |
| 3.549182399                         | 0.020382312                                     |             | 1           | FGF18                | 5           | 171419656      |       |
|                                     | 171457623                                       | +           | 1986        | protein_coding       | fibroblast  |                |       |

|                                                                                                    |   |                               |
|----------------------------------------------------------------------------------------------------|---|-------------------------------|
| growth factor 18 [Source:HGNC Symbol;Acc:HGNC:3674]                                                | - | 19                            |
| 14 9 0 4 0 0.523201607                                                                             |   |                               |
| 0.310801245 0.209925754 0 0.087768635 0                                                            |   |                               |
| ENSG00000131748 1571.153956 2011.483976 2064.132457                                                |   |                               |
| 2372.81376 2279.166534 2539.385764 1882.256796                                                     |   |                               |
| 2397.12202 -0.348285221 0.020397136 0.10198326                                                     |   | STARD3                        |
| 17 39637065 39663484 + 5160                                                                        |   |                               |
| protein_coding StAR related lipid transfer domain containing 3 [Source:HGNC Symbol;Acc:HGNC:17579] | - | 1358 2170 2111                |
| 2362 2494 2588 14.39278312 18.54146263                                                             |   |                               |
| 18.95138644 22.13254766 21.06227822 23.4131909                                                     |   |                               |
| ENSG00000145354 1597.764074 1198.547825 1266.248949                                                |   |                               |
| 898.0929305 1017.126044 1155.871882 1354.186949                                                    |   |                               |
| 1023.696952 0.402962811 0.020400655 0.10198326                                                     |   | CISD2                         |
| 4 102868974 102892807 + 6352                                                                       |   |                               |
| protein_coding CDGSH iron sulfur domain 2 [Source:HGNC Symbol;Acc:HGNC:24212]                      | - | 1381 1293 1295 894 1113       |
| 1178 11.88989178 8.97474243 9.444125177                                                            |   |                               |
| 6.805001823 7.635601817 8.657267498                                                                |   |                               |
| ENSG00000086827 1742.384284 1391.353662 1479.409004                                                |   |                               |
| 1279.832655 1279.403828 904.680709 1537.71565                                                      |   |                               |
| 1154.639064 0.412866598 0.020420343 0.102048312                                                    |   | ZW10                          |
| 11 113733187 113773811 - 2992                                                                      |   |                               |
| protein_coding zw10 kinetochore protein [Source:HGNC Symbol;Acc:HGNC:13194]                        | - | 1506 1501 1513 1274 1400      |
| 922 27.52695009 22.11836706 23.42501052                                                            |   |                               |
| 20.58775803 20.39036708 14.38518222                                                                |   |                               |
| ENSG00000044115 9171.235203 7906.893231 8744.451236                                                |   |                               |
| 7286.205844 6539.581283 7371.872198 8607.526557                                                    |   |                               |
| 7065.886442 0.284682384 0.02043688 0.102097577                                                     |   | CTNNA1                        |
| 5 138610967 138935034 + 8830                                                                       |   |                               |
| protein_coding catenin alpha 1 [Source:HGNC Symbol;Acc:HGNC:2509]                                  | - | 7927 8530 8943 7253 7156 7513 |
| 49.0956334 42.59143626 46.91643269 39.71533136                                                     |   |                               |
| 35.31573311 39.71903798                                                                            |   |                               |
| ENSG00000226026 0 12.97731597 11.73358099 0 0                                                      |   |                               |
| 0 8.236965655 0 5.538816308 0.020463067                                                            |   |                               |
| 1 AC092802.1 1 95163219 95233982                                                                   |   |                               |
| - 2505 antisense uncharacterized LOC101928118                                                      |   |                               |
| [Source:NCBI gene;Acc:101928118]                                                                   | - | 0 14 12                       |
| 0 0 0 0 0.246407693 0.221909539                                                                    |   |                               |
| 0 0 0                                                                                              |   |                               |
| ENSG00000256185 11.56961676 8.342560268 5.866790497                                                |   |                               |
| 1.004578222 0 0 8.592989174 0.334859407                                                            |   |                               |
| 4.632450814 0.020505873 1 AC055720.2 12                                                            |   |                               |
| 26335864 26336950 - 172                                                                            |   |                               |
| 3prime_overlapping_ncRNA novel transcript - 10                                                     |   |                               |
| 9 6 1 0 0 3.179554444                                                                              |   |                               |
| 2.307002263 1.615940104 0.281107718 0 0                                                            |   |                               |
| ENSG00000188878 197.8404465 253.9846126 246.4052009                                                |   |                               |



|                                             |                                                   |                           |              |        |
|---------------------------------------------|---------------------------------------------------|---------------------------|--------------|--------|
| 147.6729986                                 | 123.3710835                                       | 171.7127159               | 232.74342    |        |
| 147.5855993                                 | 0.658929404                                       | 0.020524488               | 0.10250175   | FBF1   |
| 17                                          | 75909574                                          | 75941140                  | - 6730       |        |
| protein_coding                              | Fas binding factor 1 [Source:HGNC                 |                           |              |        |
| Symbol;Acc:HGNC:24674]                      | -                                                 | 171 274                   | 252 147      | 135    |
| 175                                         | 1.389555056                                       | 1.795020681               | 1.73455443   |        |
| 1.056096217                                 | 0.87413257                                        | 1.213861173               |              |        |
| ENSG00000114554                             | 5368.302175                                       | 4910.987144               | 9858.163632  |        |
| 3787.259897                                 | 2960.906003                                       | 4322.254363               | 6712.484317  |        |
| 3690.140088                                 | 0.86320426                                        | 0.020549743               | 0.102594355  | PLXNA1 |
| 3                                           | 126988594                                         | 127037392                 | + 10944      |        |
| protein_coding                              | plexin A1 [Source:HGNC Symbol;Acc:HGNC:9099]      |                           |              |        |
| 4640                                        | 5298 10082 3770 3240                              | 4405                      | 23.18657539  | -      |
| 21.34370588                                 | 42.67495428                                       | 16.65583778               | 12.90112323  |        |
| 18.78952772                                 |                                                   |                           |              |        |
| ENSG00000215421                             | 562.2833744                                       | 460.694717                | 461.5208524  |        |
| 756.4474012                                 | 619.5969969                                       | 639.7525187               | 494.8329813  |        |
| 671.9323056                                 | -0.442165573                                      | 0.020574205               | 0.102682951  | ZNF407 |
| 18                                          | 74597870                                          | 75065671                  | + 12190      |        |
| protein_coding                              | zinc finger protein 407 [Source:HGNC              |                           |              |        |
| Symbol;Acc:HGNC:19904]                      | zf-C2H2                                           | 486 497                   | 472 753      | 678    |
| 652                                         | 2.180355333                                       | 1.797573434               | 1.793662584  |        |
| 2.986706087                                 | 2.42373194                                        | 2.496835474               |              |        |
| ENSG00000163344                             | 716.1592773                                       | 776.785056                | 784.1943298  |        |
| 848.8685976                                 | 1023.523063                                       | 1130.360278               | 759.046221   |        |
| 1000.917313                                 | -0.398847423                                      | 0.020594823               | 0.102752302  | PMVK   |
| 1                                           | 154924734                                         | 154936991                 | - 1280       |        |
| protein_coding                              | phosphomevalonate kinase [Source:HGNC             |                           |              |        |
| Symbol;Acc:HGNC:9141]                       | -                                                 | 619 838                   | 802 845      | 1120   |
| 1152                                        | 26.4469377                                        | 28.86476373               | 29.02464085  |        |
| 31.91890291                                 | 38.12998643                                       | 42.0134693                |              |        |
| ENSG00000234754                             | 23.13923351                                       | 0 2.933395248             | 0 0          |        |
| 0                                           | 8.690876254                                       | 0 5.606504128             | 0.020628865  |        |
| 1                                           | C1orf140                                          | 1 221330080               | 221336296    |        |
| -                                           | 4340 lincRNA                                      | uncharacterized LOC400804 | [Source:NCBI |        |
| gene;Acc:400804]                            | -                                                 | 20 0 3                    | 0 0          |        |
| 0                                           | 0.252019984                                       | 0 0.032020933             | 0 0          |        |
| 0                                           |                                                   |                           |              |        |
| ENSG00000135316                             | 7698.42299                                        | 7094.884032               | 8126.482637  |        |
| 6488.570736                                 | 6249.887702                                       | 6235.624626               | 7639.929886  |        |
| 6324.694355                                 | 0.272542652                                       | 0.020650392               | 0.1029829    |        |
| SYNCRIP 6                                   | 85607785                                          | 85643792                  | - 8205       |        |
| protein_coding                              | synaptotagmin binding cytoplasmic RNA interacting |                           |              |        |
| protein [Source:HGNC Symbol;Acc:HGNC:16918] | -                                                 | 6654 7654                 |              |        |
| 8311 6459 6839 6355                         | 44.35054121                                       | 41.1285909                |              |        |
| 46.92206888                                 | 38.06167667                                       | 36.32223936               | 36.15621876  |        |
| ENSG00000033800                             | 945.2376891                                       | 819.4248085               | 824.2840648  |        |
| 723.2963199                                 | 556.5406653                                       | 664.2829067               | 862.9821875  |        |
| 648.039964                                  | 0.413162242                                       | 0.020654515               | 0.1029829    | PIAS1  |
| 15                                          | 68054179                                          | 68198603                  | + 10776      |        |

|                                |                                                    |                        |             |             |                |             |  |
|--------------------------------|----------------------------------------------------|------------------------|-------------|-------------|----------------|-------------|--|
| protein_coding                 | protein inhibitor of activated STAT 1 [Source:HGNC |                        |             |             |                |             |  |
| Symbol;Acc:HGNC:2752]          | zf-MIZ                                             | 817                    | 884         | 843         | 720            | 609         |  |
| 677                            | 4.146285344                                        | 3.61683453             | 3.623868648 |             |                |             |  |
| 3.230547494                    | 2.462738545                                        | 2.932764035            |             |             |                |             |  |
| ENSG00000274425                | 8.09873173                                         | 8.342560268            | 0.977798416 |             |                |             |  |
| 48.21975466                    | 33.81281546                                        | 6.868508636            | 5.806363471 |             |                |             |  |
| 29.63369292                    | -2.356130365                                       | 0.020699428            | 0.103173187 |             |                |             |  |
| AC114271.1                     | 19                                                 | 10333436               | 10336248    | +           |                | 2813        |  |
| antisense                      | "novel transcript, antisense to ICAM3"             |                        |             |             |                | -           |  |
| 7                              | 9                                                  | 1                      | 48          | 37          | 7              | 0.136088999 |  |
|                                | 0.141060928                                        | 0.016467692            | 0.825035663 | 0.573179421 |                |             |  |
|                                | 0.116164745                                        |                        |             |             |                |             |  |
| ENSG00000186566                | 1779.407057                                        | 2076.370555            | 2137.467338 |             |                |             |  |
| 2959.487442                    | 2152.140011                                        | 2597.27748             | 1997.748317 |             |                |             |  |
| 2569.634978                    | -0.362744031                                       | 0.020757164            | 0.103426744 |             |                |             |  |
| GPATCH8 17                     | 44395284                                           | 44503430               | -           | 9734        |                |             |  |
| protein_coding                 | G-patch domain containing 8 [Source:HGNC           |                        |             |             |                |             |  |
| Symbol;Acc:HGNC:29066]         | -                                                  | 1538                   | 2240        | 2186        | 2946           | 2355        |  |
| 2647                           | 8.640914468                                        | 10.14590133            | 10.40306403 |             |                |             |  |
| 14.63331148                    | 10.54285339                                        | 12.69429642            |             |             |                |             |  |
| ENSG00000181404                | 167.759443                                         | 304.0399742            | 297.2507185 |             |                |             |  |
| 397.8129759                    | 405.7537856                                        | 370.8994664            | 256.3500452 |             |                |             |  |
| 391.4887426                    | -0.608283281                                       | 0.020763831            | 0.103426744 |             |                | WASHC1      |  |
| 9                              | 14521                                              | 73865                  | -           | 2270        | protein_coding | WASH        |  |
| complex subunit 1 [Source:HGNC | Symbol;Acc:HGNC:24361]                             | -                      |             |             |                | 145         |  |
| 328                            | 304                                                | 396                    | 444         | 378         | 3.493307834    |             |  |
| 6.370623576                    | 6.203691348                                        | 8.434717571            | 8.523455747 |             |                |             |  |
| 7.773417227                    |                                                    |                        |             |             |                |             |  |
| ENSG00000188021                | 2354.41701                                         | 2275.665051            | 2350.627392 |             |                |             |  |
| 2557.656153                    | 3267.962922                                        | 2895.566998            | 2326.903151 |             |                |             |  |
| 2907.062024                    | -0.321331868                                       | 0.020799835            | 0.103572336 |             |                | UBQLN2      |  |
| X                              | 56563639                                           | 56567868               | +           | 4230        |                |             |  |
| protein_coding                 | ubiquilin 2 [Source:HGNC                           | Symbol;Acc:HGNC:12509] | -           |             |                |             |  |
| 2035                           | 2455                                               | 2404                   | 2546        | 3576        | 2951           | 26.30987344 |  |
|                                | 25.58851525                                        | 26.32670771            | 29.10175957 | 36.83967078 |                |             |  |
|                                | 32.56678432                                        |                        |             |             |                |             |  |
| ENSG00000237115                | 17.35442514                                        | 12.05036483            | 31.28954932 |             |                |             |  |
| 4.018312888                    | 5.483159264                                        | 0.981215519            | 20.23144643 |             |                |             |  |
| 3.494229224                    | 2.528742838                                        | 0.020925376            | 1           | AL139805.1  |                |             |  |
| 6                              | 131825981                                          | 131828413              | -           | 2433        |                |             |  |
| processed_pseudogene           | T-cell activation leucine repeat-rich protein      |                        |             |             |                |             |  |
| (TA-LRRP) pseudogene           | -                                                  | 15                     | 13          | 32          | 4              | 6           |  |
| 1                              | 0.337166069                                        | 0.235578255            | 0.609270745 |             |                |             |  |
| 0.079491208                    | 0.107465172                                        | 0.019186861            |             |             |                |             |  |
| ENSG00000150787                | 902.4301071                                        | 793.4701766            | 692.2812786 |             |                |             |  |
| 600.7377768                    | 641.5296339                                        | 538.6873202            | 796.0605208 |             |                |             |  |
| 593.651577                     | 0.422483731                                        | 0.02092902             | 0.104181678 |             |                | PTS         |  |
| 11                             | 112226365                                          | 112269955              | +           | 3130        |                |             |  |
| protein_coding                 | 6-pyruvoyltetrahydropterin synthase [Source:HGNC   |                        |             |             |                |             |  |
| Symbol;Acc:HGNC:9689]          | -                                                  | 780                    | 856         | 708         | 598            | 702         |  |

|                                     |                                                                             |             |             |                   |
|-------------------------------------|-----------------------------------------------------------------------------|-------------|-------------|-------------------|
| 549                                 | 13.62840333                                                                 | 12.05766976 | 10.47831321 |                   |
| 9.237576818                         | 9.773528244                                                                 | 8.187928522 |             |                   |
| ENSG00000225163                     | 32.39492692                                                                 | 18.53902282 | 9.777984162 | 0                 |
| 0                                   | 6.868508636                                                                 | 20.2373113  | 2.289502879 |                   |
| 3.147843597                         | 0.020932013                                                                 | 1           | LINC00618   | 14                |
| 96931367                            | 96945394                                                                    | +           | 700         | sense_overlapping |
|                                     | long intergenic non-protein coding RNA 618 [Source:HGNC                     |             |             |                   |
| Symbol;Acc:HGNC:20110]              | -                                                                           | 28          | 20          | 10 0 0            |
| 7                                   | 2.187533457                                                                 | 1.259696474 | 0.661765947 | 0                 |
| 0                                   | 0.466816326                                                                 |             |             |                   |
| ENSG00000198712                     | 42100.67842                                                                 | 39908.02747 | 54809.51242 |                   |
| 59006.91561                         | 54849.86984                                                                 | 56740.74984 | 45606.07277 |                   |
| 56865.8451                          | -0.318328877                                                                | 0.020993904 | 0.104470639 | MT-C02            |
| MT                                  | 7586                                                                        | 8269        | +           | 684               |
|                                     | protein_coding mitochondrially encoded cytochrome c oxidase II [Source:HGNC |             |             |                   |
| Symbol;Acc:HGNC:7421]               | -                                                                           | 36389       | 43053       | 56054 58738 60020 |
| 57827                               | 2909.435489                                                                 | 2775.116857 | 3796.233902 |                   |
| 4152.066204                         | 3823.829216                                                                 | 3946.577143 |             |                   |
| ENSG00000077238                     | 1102.584477                                                                 | 1046.527838 | 1283.84932  |                   |
| 725.3054763                         | 936.7063744                                                                 | 937.0608211 | 1144.320545 |                   |
| 866.3575572                         | 0.40126317                                                                  | 0.021031206 | 0.104622206 | IL4R              |
| 16                                  | 27313668                                                                    | 27364778    | +           | 5894              |
|                                     | protein_coding interleukin 4 receptor [Source:HGNC                          |             |             |                   |
| Symbol;Acc:HGNC:6015]               | -                                                                           | 953         | 1129        | 1313 722 1025     |
| 955                                 | 8.842549138                                                                 | 8.445352249 | 10.31946186 |                   |
| 5.922816568                         | 7.578309389                                                                 | 7.563786748 |             |                   |
| ENSG00000103540                     | 1242.57684                                                                  | 1000.180281 | 1308.294281 |                   |
| 915.1707603                         | 1014.384464                                                                 | 702.5503119 | 1183.683801 |                   |
| 877.368512                          | 0.431550383                                                                 | 0.021044199 | 0.104652789 | CCP110            |
| 16                                  | 19523811                                                                    | 19553408    | +           | 10142             |
|                                     | protein_coding centriolar coiled-coil protein 110 [Source:HGNC              |             |             |                   |
| Symbol;Acc:HGNC:24342]              | -                                                                           | 1074        | 1079        | 1338 911 1110     |
| 716                                 | 5.791291001                                                                 | 4.690636692 | 6.111319131 |                   |
| 4.34306158                          | 4.769336557                                                                 | 3.295607268 |             |                   |
| ENSG00000135926                     | 2462.014446                                                                 | 2672.400139 | 2135.511741 |                   |
| 2634.004098                         | 3330.105393                                                                 | 3277.259835 | 2423.308775 |                   |
| 3080.456442                         | -0.346222224                                                                | 0.021071409 | 0.104753852 | TMBIM1            |
| 2                                   | 218274192                                                                   | 218292586   | -           | 5098              |
|                                     | protein_coding transmembrane BAX inhibitor motif containing 1               |             |             |                   |
| [Source:HGNC Symbol;Acc:HGNC:23410] | -                                                                           |             | 2128        | 2883 2184         |
| 2622                                | 3644                                                                        | 3340        | 22.82792858 | 24.93324297       |
| 19.84518988                         | 24.86761143                                                                 | 31.14849982 | 30.58388637 |                   |
| ENSG00000116525                     | 111.0683209                                                                 | 304.9669253 | 283.5615407 |                   |
| 163.7462502                         | 85.90282848                                                                 | 126.576802  | 233.198929  |                   |
| 125.4086269                         | 0.897995813                                                                 | 0.021078227 | 0.104753852 | TRIM62            |
| 1                                   | 33145402                                                                    | 33182059    | -           | 3646              |
|                                     | protein_coding tripartite motif containing 62 [Source:HGNC                  |             |             |                   |
| Symbol;Acc:HGNC:25574]              | -                                                                           | 96          | 329         | 290 163 94        |
| 129                                 | 1.439956198                                                                 | 3.978443471 | 3.684544358 |                   |
| 2.161584197                         | 1.12349149                                                                  | 1.651654032 |             |                   |

|                                                 |                                                    |              |             |             |                       |
|-------------------------------------------------|----------------------------------------------------|--------------|-------------|-------------|-----------------------|
| ENSG00000126012                                 | 2003.857622                                        | 2054.123728  | 2251.869752 |             |                       |
| 2713.365778                                     | 2382.4327                                          | 2736.610084  | 2103.283701 |             |                       |
| 2610.802854                                     | -0.31162914                                        | 0.021142301  | 0.105038137 | KDM5C       |                       |
| X                                               | 53191321                                           | 53225422     | -           | 8727        |                       |
| protein_coding                                  | lysine demethylase 5C [Source:HGNC                 |              |             |             |                       |
| Symbol;Acc:HGNC:11114]                          | ARID                                               | 1732         | 2216        | 2303        | 2701                  |
| 2789                                            | 10.85369528                                        | 11.19537739  | 12.22450881 |             | 2607                  |
| 14.96445225                                     | 13.01771182                                        | 14.91865168  |             |             |                       |
| ENSG00000213371                                 | 0                                                  | 0            | 32.1465031  | 0           | 0                     |
| 0                                               | 10.71550103                                        | -5.840040276 | 0.021153366 |             | 1                     |
| NAP1L1P3                                        | 3                                                  | 120805866    | 120806745   |             | +                     |
| 880                                             | processed_pseudogene nucleosome assembly protein 1 |              |             |             |                       |
| like 1 pseudogene 3                             | [Source:HGNC Symbol;Acc:HGNC:38007]                |              |             |             |                       |
| 0                                               | 0                                                  | 32           | 0           | 0           | 0                     |
| 1.758201                                        | 0                                                  | 0            |             |             |                       |
| ENSG00000235505                                 | 15.04050178                                        | 0            | 9.777984162 | 0           | 0                     |
| 0                                               | 8.272828649                                        | 0            | 5.537708372 | 0.021181266 |                       |
| 1                                               | CASP17P 11                                         | 104901549    | 104919073   |             | -                     |
| 4307                                            | transcribed_unprocessed_pseudogene "caspase 17,    |              |             |             |                       |
| pseudogene [Source:HGNC Symbol;Acc:HGNC:53657]" | -                                                  |              | 13          |             | 0                     |
| 10                                              | 0                                                  | 0            | 0.165068116 | 0           |                       |
| 0.107554252                                     | 0                                                  | 0            |             |             |                       |
| ENSG00000134900                                 | 2541.844802                                        | 2389.680041  | 2235.247179 |             |                       |
| 2199.021728                                     | 1707.090251                                        | 1730.864176  | 2388.924007 |             |                       |
| 1878.992052                                     | 0.346419229                                        | 0.021184637  | 0.105214276 | TPP2        |                       |
| 13                                              | 102597003                                          | 102679958    | +           | 6752        |                       |
| protein_coding                                  | tripeptidyl peptidase 2 [Source:HGNC               |              |             |             |                       |
| Symbol;Acc:HGNC:12016]                          | -                                                  | 2197         | 2578        | 2286        | 2189                  |
| 1764                                            | 17.79476824                                        | 16.83388815  | 15.68361773 |             | 1868                  |
| 15.67525247                                     | 12.05599436                                        | 12.19585305  |             |             |                       |
| ENSG00000198618                                 | 284.6125722                                        | 196.5136419  | 218.0490468 |             |                       |
| 137.6272164                                     | 134.337402                                         | 168.7690693  | 233.0584203 |             |                       |
| 146.9112292                                     | 0.66431266                                         | 0.021239523  | 0.105452612 |             |                       |
| PPIAP22 21                                      | 18857779                                           | 18858276     | +           | 498         |                       |
| processed_pseudogene                            | peptidylprolyl isomerase A pseudogene 22           |              |             |             |                       |
| [Source:HGNC Symbol;Acc:HGNC:17236]             | -                                                  |              | 246         | 212         | 223                   |
| 137                                             | 147                                                | 172          | 27.01472041 | 18.76897156 |                       |
| 20.7433061                                      | 13.30124953                                        | 12.86312795  | 16.12297349 |             |                       |
| ENSG00000148344                                 | 32.39492692                                        | 52.83621503  | 113.4246163 |             |                       |
| 25.11445555                                     | 15.53561792                                        | 33.36132766  | 66.21858607 |             |                       |
| 24.67046704                                     | 1.428375766                                        | 0.021250933  | 0.105475005 | PTGES       |                       |
| 9                                               | 129738331                                          | 129753047    | -           | 1896        |                       |
| protein_coding                                  | prostaglandin E synthase [Source:HGNC              |              |             |             |                       |
| Symbol;Acc:HGNC:9599]                           | -                                                  | 28           | 57          | 116         | 25                    |
| 34                                              | 0.80763366                                         | 1.325471764  | 2.834145302 |             | 17                    |
| 0.637533327                                     | 0.390723188                                        | 0.837117883  |             |             |                       |
| ENSG00000178397                                 | 828.3845598                                        | 722.0949387  | 802.7724997 |             |                       |
| 1050.78882                                      | 1058.249738                                        | 933.135959   | 784.4173327 |             |                       |
| 1014.058172                                     | -0.370957777                                       | 0.021270858  | 0.105520802 |             |                       |
| FAM220A 7                                       | 6329409                                            | 6348981      | -           | 2395        | protein_coding family |

with sequence similarity 220 member A [Source:HGNC  
Symbol;Acc:HGNC:22422] - 716 779 821 1046 1158  
951 16.34941498 14.34055297 15.87961962  
21.11676483 21.06985949 18.53621401  
ENSG00000275591 34.70885027 76.00999355 97.77984162  
14.06409511 46.60685375 13.73701727 69.49956181  
24.80265538 1.484458197 0.021273966 0.105520802 XKR5  
8 6808517 6835644 - 5031 protein\_coding XK  
related 5 [Source:HGNC Symbol;Acc:HGNC:20782] - 30 82  
100 14 51 14 0.326108148 0.718610391  
0.920763592 0.134547284 0.441747862 0.129903171  
ENSG00000146197 67.10377719 92.69511408 185.7816991  
67.30674088 33.81281546 58.87293117 115.1935301  
53.33082917 1.11426012 0.021283677 0.105534728 SCUBE3  
6 35214419 35253079 + 7356  
protein\_coding "signal peptide, CUB domain and EGF like domain  
containing 3 [Source:HGNC Symbol;Acc:HGNC:13655]" - 58  
100 190 67 37 60 0.431202218  
0.599366185 1.1965045 0.440386806 0.219188922  
0.380763724  
ENSG00000072954 55.53416043 78.79084697 45.95652556  
178.8149235 90.47212786 93.21547435 60.09384432  
120.8341752 -1.005234075 0.021309221 0.105627129  
TMEM38A 19 16661127 16690029 + 3005  
protein\_coding transmembrane protein 38A [Source:HGNC  
Symbol;Acc:HGNC:28462] - 48 85 47 178 99  
95 0.873557454 1.247120469 0.724529107  
2.86402459 1.435652449 1.475792044  
ENSG00000135414 281.1416872 304.0399742 286.4949359  
387.7671937 366.4578108 488.6453287 290.5588658  
414.2901111 -0.511228692 0.021335623 0.105723716 GDF11  
12 55743280 55757278 + 8657  
protein\_coding growth differentiation factor 11 [Source:HGNC  
Symbol;Acc:HGNC:4216] - 243 328 293 386 401  
498 1.535089032 1.670476553 1.567843315  
2.155862725 2.018531601 2.685393671  
ENSG00000112167 432.7036667 433.8131339 346.1406393  
588.6828381 543.7466271 529.8563805 404.2191467  
554.0952819 -0.455276424 0.02134453 0.10573358 SAYSD1  
6 39104064 39115189 - 2925  
protein\_coding SAYSVFN motif domain containing 1 [Source:HGNC  
Symbol;Acc:HGNC:21025] - 374 468 354 586 595  
540 6.992628316 7.054300253 5.606345359  
9.686635593 8.864407103 8.618147549  
ENSG00000171490 5576.555277 6178.129354 5488.38251  
6639.257469 7599.658741 6765.481007 5747.689047  
7001.465739 -0.284649266 0.021355484 0.105753575 RSL1D1  
16 11833850 11851585 - 6167  
protein\_coding ribosomal L1 domain containing 1 [Source:HGNC  
Symbol;Acc:HGNC:24534] - 4820 6665 5613 6609 8316

|                                                             |              |                                                  |             |                |
|-------------------------------------------------------------|--------------|--------------------------------------------------|-------------|----------------|
| 6895                                                        | 42.74327576  | 47.64969919                                      | 42.16222772 |                |
| 51.8158969                                                  | 58.76234653  | 52.19229065                                      |             |                |
| ENSG00000165629                                             | 2689.935896  | 2379.483579                                      | 2366.272167 |                |
| 1781.117188                                                 | 2056.184724  | 2111.575798                                      | 2478.563881 |                |
| 1982.959237                                                 | 0.321526873  | 0.021413442                                      | 0.105967178 |                |
| ATP5F1C 10                                                  | 7788129      | 7807815 +                                        | 2326        | protein_coding |
| synthase F1 subunit gamma [Source:HGNC Symbol;Acc:HGNC:833] |              |                                                  |             | ATP            |
| 2325                                                        | 2567         | 2420                                             | 1773        | 2250           |
| 2152                                                        | 54.66482468  |                                                  |             |                |
| 48.6575364                                                  | 48.19567991  | 36.8553247                                       | 42.15328312 |                |
| 43.18954138                                                 |              |                                                  |             |                |
| ENSG00000235897                                             | 19.66834849  | 48.20145932                                      | 43.02313031 |                |
| 71.32505376                                                 | 88.64440811  | 86.34696571                                      | 36.96431271 |                |
| 82.10547586                                                 | -1.14480918  | 0.021422416                                      | 0.105967178 |                |
| TM4SF19-AS1                                                 | 3            | 196318330                                        | 196325570   | +              |
| antisense                                                   |              | TM4SF19 antisense RNA 1 [Source:HGNC             |             |                |
| Symbol;Acc:HGNC:41085]                                      | -            | 17                                               | 52          | 44             |
| 71                                                          |              |                                                  |             | 97             |
| 88                                                          | 0.435253614  | 1.073336883                                      | 0.954231797 |                |
| 1.607157047                                                 | 1.978923855  | 1.923213326                                      |             |                |
| ENSG00000101361                                             | 4358.274632  | 5076.911398                                      | 4850.857943 |                |
| 6025.460176                                                 | 5247.383416  | 6339.633471                                      | 4762.014658 |                |
| 5870.825688                                                 | -0.301789433 | 0.021423176                                      | 0.105967178 | NOP56          |
| 20                                                          | 2652145      | 2658393 +                                        | 5398        | protein_coding |
| ribonucleoprotein [Source:HGNC Symbol;Acc:HGNC:15911]       |              |                                                  |             | NOP56          |
| 5477                                                        | 4961         | 5998                                             | 5742        | 6461           |
| 38.16431333                                                 |              |                                                  |             | 3767           |
| 44.73462681                                                 | 42.57344582  | 53.7247988                                       | 46.3541803  |                |
| 55.8744031                                                  |              |                                                  |             |                |
| ENSG00000167487                                             | 244.1189136  | 261.4002217                                      | 391.1193665 |                |
| 420.918275                                                  | 387.476588   | 529.8563805                                      | 298.8795006 |                |
| 446.0837479                                                 | -0.576652538 | 0.021429124                                      | 0.105967178 | KLHL26         |
| 19                                                          | 18636965     | 18671714                                         | +           | 4797           |
| protein_coding                                              |              | kelch like family member 26 [Source:HGNC         |             |                |
| Symbol;Acc:HGNC:25623]                                      | -            | 211                                              | 282         | 400            |
| 419                                                         |              |                                                  |             | 424            |
| 540                                                         | 2.405511567  | 2.591870793                                      | 3.862715557 |                |
| 4.223237653                                                 | 3.851720241  | 5.254968017                                      |             |                |
| ENSG00000108389                                             | 1920.556382  | 1593.429011                                      | 1854.883595 |                |
| 1491.79866                                                  | 1466.745103  | 1265.76802                                       | 1789.622996 |                |
| 1408.103928                                                 | 0.345562354  | 0.021433278                                      | 0.105967178 | MTMR4          |
| 17                                                          | 58489529     | 58517905                                         | -           | 7475           |
| protein_coding                                              |              | myotubularin related protein 4 [Source:HGNC      |             |                |
| Symbol;Acc:HGNC:7452]                                       | -            | 1660                                             | 1719        | 1897           |
| 1485                                                        |              |                                                  |             | 1605           |
| 1290                                                        | 12.14483458  | 10.13908205                                      | 11.75597326 |                |
| 9.605422519                                                 | 9.356694234  | 8.056094448                                      |             |                |
| ENSG00000198055                                             | 792.5187479  | 1004.815037                                      | 924.0195033 |                |
| 1346.134818                                                 | 1155.118885  | 1067.562485                                      | 907.1177626 |                |
| 1189.605396                                                 | -0.390312608 | 0.021451495                                      | 0.106009867 | GRK6           |
| 5                                                           | 177403204    | 177442901                                        | +           | 4355           |
| protein_coding                                              |              | G protein-coupled receptor kinase 6 [Source:HGNC |             |                |
| Symbol;Acc:HGNC:4545]                                       | -            | 685                                              | 1084        | 945            |
| 1340                                                        |              |                                                  |             | 1264           |
| 1088                                                        | 8.60195418   | 10.97425585                                      | 10.05185245 |                |
| 14.87708538                                                 | 12.64787347  | 11.66236882                                      |             |                |

|                                                             |                                                  |             |                |                |      |
|-------------------------------------------------------------|--------------------------------------------------|-------------|----------------|----------------|------|
| ENSG00000158417                                             | 3842.269725                                      | 3620.671156 | 3618.831938    |                |      |
| 3045.881169                                                 | 2971.872321                                      | 3125.17143  | 3693.924273    |                |      |
| 3047.64164                                                  | 0.277384003                                      | 0.021455781 | 0.106009867    | EIF5B          |      |
| 2                                                           | 99337353                                         | 99401326    | + 7883         |                |      |
| protein_coding                                              | eukaryotic translation initiation factor 5B      |             |                |                |      |
| [Source:HGNC Symbol;Acc:HGNC:30793]                         | -                                                | 3321        | 3906           | 3701           |      |
| 3032                                                        | 3252                                             | 3185        | 23.03944758    | 21.84613788    |      |
| 21.74853533                                                 | 18.59682854                                      | 17.97701613 | 18.8609666     |                |      |
| ENSG00000141644                                             | 1686.850123                                      | 1902.103741 | 1908.662508    |                |      |
| 2177.925585                                                 | 2524.080981                                      | 2172.41116  | 1832.538791    |                |      |
| 2291.472576                                                 | -0.322253005                                     | 0.021489957 | 0.106089673    | MBD1           |      |
| 18                                                          | 50266882                                         | 50281774    | - 6734         |                |      |
| protein_coding                                              | methyl-CpG binding domain protein 1 [Source:HGNC |             |                |                |      |
| Symbol;Acc:HGNC:6916]                                       | MBD                                              | 1458        | 2052           | 1952           | 2168 |
| 2214                                                        | 11.84074763                                      | 13.43501644 | 13.42793274    | 2762           |      |
| 15.56637119                                                 | 17.8734817                                       | 15.34795582 |                |                |      |
| ENSG00000178971                                             | 329.7340776                                      | 357.8031404 | 419.4755205    |                |      |
| 441.0098395                                                 | 530.0387289                                      | 580.8795875 | 369.0042462    |                |      |
| 517.3093853                                                 | -0.486848735                                     | 0.021491902 | 0.106089673    | CTC1           |      |
| 17                                                          | 8224821                                          | 8248095     | - 8566         | protein_coding | CST  |
| telomere replication complex component 1 [Source:HGNC       |                                                  |             |                |                |      |
| Symbol;Acc:HGNC:26169]                                      | -                                                | 285         | 386            | 429            | 439  |
| 592                                                         | 1.819539561                                      | 1.986749867 | 2.319966308    | 580            |      |
| 2.4779222                                                   | 2.950587656                                      | 3.226188008 |                |                |      |
| ENSG00000064102                                             | 1079.445243                                      | 1062.286007 | 961.1758431    |                |      |
| 737.360415                                                  | 900.1519793                                      | 743.7613638 | 1034.302365    |                |      |
| 793.7579193                                                 | 0.38141095                                       | 0.021492753 | 0.106089673    | INTS13         |      |
| 12                                                          | 26905181                                         | 26938326    | - 3345         |                |      |
| protein_coding                                              | integrator complex subunit 13 [Source:HGNC       |             |                |                |      |
| Symbol;Acc:HGNC:20174]                                      | -                                                | 933         | 1146           | 983            | 734  |
| 758                                                         | 15.2538768                                       | 15.10505996 | 13.61318829    | 985            |      |
| 10.60965237                                                 | 12.83212868                                      | 10.57837892 |                |                |      |
| ENSG00000119280                                             | 905.9009921                                      | 1018.719304 | 1186.069479    |                |      |
| 796.6305301                                                 | 811.5075711                                      | 775.1602604 | 1036.896592    |                |      |
| 794.4327872                                                 | 0.384732553                                      | 0.02160142  | 0.106565728    |                |      |
| C1orf198                                                    | 1                                                | 230837119   | 230869589      | -              | 5161 |
| protein_coding                                              | chromosome 1 open reading frame 198              |             |                |                |      |
| [Source:HGNC Symbol;Acc:HGNC:25900]                         | -                                                | 783         | 1099           | 1213           |      |
| 793                                                         | 888                                              | 790         | 8.297029147    | 9.388534172    |      |
| 10.88753082                                                 | 7.429174249                                      | 7.497866516 | 7.145609324    |                |      |
| ENSG00000110852                                             | 16.19746346                                      | 4.634755704 | 0              | 42.19228532    |      |
| 41.12369448                                                 | 18.64309487                                      | 6.944073055 | 33.98635823    |                |      |
| -2.313846157                                                | 0.021603139                                      | 0.106565728 | CLEC2B         | 12             |      |
| 9852984                                                     | 9870136                                          | - 2638      | protein_coding | C-type lectin  |      |
| domain family 2 member B [Source:HGNC Symbol;Acc:HGNC:2053] | -                                                |             |                |                |      |
| 14                                                          | 5                                                | 0           | 42             | 45             | 19   |
| 0.083565915                                                 | 0                                                | 0.769796116 | 0.743355091    | 0.290233779    |      |
| 0.336221008                                                 |                                                  |             |                |                |      |
| ENSG00000081148                                             | 0                                                | 0           | 20.09156444    | 5.483159264    |      |
| 0                                                           | 0                                                | 8.524907902 | -5.510518922   | 0.021605687    |      |

|                         |                                                        |                          |                             |             |              |       |
|-------------------------|--------------------------------------------------------|--------------------------|-----------------------------|-------------|--------------|-------|
| 1                       | IMPG2                                                  | 3                        | 101222546                   | 101320560   | -            |       |
| 8337                    | protein_coding                                         |                          | interphotoreceptor          | matrix      | proteoglycan |       |
| 2 [Source:HGNC          | Symbol;Acc:HGNC:18362]                                 |                          | -                           | 0           | 0            | 0     |
| 20                      | 6                                                      | 0                        | 0                           | 0           | 0.11599023   |       |
| 0.031361733             |                                                        | 0                        |                             |             |              |       |
| ENSG00000241409         | 0                                                      | 0                        | 0                           | 20.09156444 | 5.483159264  |       |
| 0                       | 0                                                      | 8.524907902              | -5.510518922                | 0.021605687 |              |       |
| 1                       | AC064852.1                                             | 2                        | 232760146                   | 232767949   |              |       |
| -                       | 851                                                    | 3prime_overlapping_ncRNA |                             | novel       |              |       |
| transcript              | -                                                      | 0                        | 0                           | 0           | 20           | 6     |
| 0                       | 0                                                      | 0                        | 1.13632262                  | 0.307241791 | 0            | 0     |
| ENSG00000111011         | 1220.594568                                            |                          | 1263.434405                 | 1339.58383  |              |       |
| 1058.825446             | 698.1889463                                            |                          | 1081.299502                 | 1274.537601 |              |       |
| 946.1046316             | 0.430417899                                            |                          | 0.021620459                 | 0.106597677 |              | RSRC2 |
| 12                      | 122503458                                              |                          | 122527000                   | -           | 8741         |       |
| protein_coding          | arginine and serine rich coiled-coil 2 [Source:HGNC    |                          |                             |             |              |       |
| Symbol;Acc:HGNC:30559]  | -                                                      | 1055                     | 1363                        | 1370        | 1054         | 764   |
| 1102                    | 6.60064008                                             |                          | 6.874936538                 | 7.260422646 |              |       |
| 5.830163137             | 3.808823395                                            |                          | 5.885271602                 |             |              |       |
| ENSG00000142208         | 2222.523379                                            |                          | 2451.785768                 | 2949.040023 |              |       |
| 1843.401037             | 2122.896495                                            |                          | 2035.040987                 | 2541.11639  |              |       |
| 2000.446173             | 0.345292901                                            |                          | 0.021623562                 | 0.106597677 |              | AKT1  |
| 14                      | 104769349                                              |                          | 104795751                   | -           | 11162        |       |
| protein_coding          | AKT serine/threonine kinase 1 [Source:HGNC             |                          |                             |             |              |       |
| Symbol;Acc:HGNC:391]    | -                                                      | 1921                     | 2645                        | 3016        | 1835         | 2323  |
| 2074                    | 9.41195971                                             |                          | 10.44762597                 | 12.51675567 |              |       |
| 7.94868464              | 9.069133385                                            |                          | 8.673867221                 |             |              |       |
| ENSG00000163682         | 6249.906972                                            |                          | 7857.764821                 | 7264.064434 |              |       |
| 7141.54658              | 9568.112917                                            |                          | 10918.9663                  | 7123.912076 |              |       |
| 9209.541933             | -0.370383898                                           |                          | 0.021632213                 | 0.106605946 |              | RPL9  |
| 4                       | 39452521                                               |                          | 39458949                    | -           | 5022         |       |
| protein_coding          | ribosomal protein L9 [Source:HGNC                      |                          |                             |             |              |       |
| Symbol;Acc:HGNC:10369]  | -                                                      | 5402                     | 8477                        | 7429        | 7109         | 10470 |
| 11128                   | 58.82644233                                            |                          | 74.42167369                 | 68.52611422 |              |       |
| 68.44362803             | 90.85076133                                            |                          | 103.4395076                 |             |              |       |
| ENSG00000132467         | 1878.905761                                            |                          | 1445.116829                 | 1298.516297 |              |       |
| 1910.707778             | 1954.746278                                            |                          | 2141.012263                 | 1540.846296 |              |       |
| 2002.15544              | -0.378496928                                           |                          | 0.021682738                 | 0.106820501 |              | UTP3  |
| 4                       | 70688479                                               |                          | 70690551                    | +           | 2073         |       |
| protein_coding          | "UTP3, small subunit processome component [Source:HGNC |                          |                             |             |              |       |
| Symbol;Acc:HGNC:24477]" | -                                                      | 1624                     | 1559                        | 1328        | 1902         | 2139  |
| 2182                    | 42.84315406                                            |                          | 33.1574231                  | 29.67571754 |              |       |
| 44.36213376             | 44.96453228                                            |                          | 49.13619018                 |             |              |       |
| ENSG00000243051         | 0                                                      | 0                        | 0                           | 0           | 26.50193645  |       |
| 0.981215519             | 0                                                      | 9.161050655              | -5.61767475                 | 0.021687822 |              |       |
| 1                       | RN7SL269P                                              | 1                        | 169957942                   | 169958246   |              |       |
| -                       | 305                                                    | misc_RNA                 | "RNA, 7SL, cytoplasmic 269, |             |              |       |
| pseudogene [Source:HGNC | Symbol;Acc:HGNC:46285]"                                | -                        | 0                           | 0           |              |       |
| 0                       | 0                                                      | 29                       | 1                           | 0           | 0            | 0     |
| 4.143398994             |                                                        | 0.153054533              |                             |             |              |       |



|                                      |                                                         |             |             |             |             |
|--------------------------------------|---------------------------------------------------------|-------------|-------------|-------------|-------------|
| ENSG00000128602                      | 156.1898262                                             | 185.3902282 | 204.359869  |             |             |
| 365.6664728                          | 257.7084854                                             | 229.6044316 | 181.9799745 |             |             |
| 284.3264633                          | -0.642172572                                            | 0.021710132 | 0.106920999 | SMO         |             |
| 7                                    | 129188872                                               | 129213545   | + 4311      |             |             |
| protein_coding                       | "smoothened, frizzled class receptor [Source:HGNC       |             |             |             |             |
| Symbol;Acc:HGNC:11119]"              | -                                                       | 135 200     | 209 364     | 282         |             |
| 234                                  | 1.712578385                                             | 2.045436167 | 2.245798146 |             |             |
| 4.082484808                          | 2.850556695                                             | 2.53386732  |             |             |             |
| ENSG00000143751                      | 1366.371739                                             | 1296.804646 | 1094.156428 |             |             |
| 1594.265638                          | 1820.408876                                             | 1434.537089 | 1252.444271 |             |             |
| 1616.403868                          | -0.368480099                                            | 0.021725971 | 0.106964547 | SDE2        |             |
| 1                                    | 225982702                                               | 225999331   | - 3975      |             |             |
| protein_coding                       | SDE2 telomere maintenance homolog [Source:HGNC          |             |             |             |             |
| Symbol;Acc:HGNC:26643]"              | -                                                       | 1181 1399   | 1119 1587   | 1992        |             |
| 1462                                 | 16.2482831                                              | 15.51724222 | 13.04053501 |             |             |
| 19.30372003                          | 21.83789627                                             | 17.16944573 |             |             |             |
| ENSG00000243155                      | 8.09873173                                              | 27.80853423 | 5.866790497 |             |             |
| 41.1877071                           | 40.20983461                                             | 54.94806909 | 13.92468548 |             |             |
| 45.44853693                          | -1.696193368                                            | 0.021740178 | 0.107000034 |             |             |
| AL162431.2                           | 1                                                       | 180944042   | 180976482   | -           | 2424        |
| antisense                            | novel transcript                                        |             | -           | 7           | 30          |
| 6                                    | 41                                                      | 44          | 56          | 0.157928364 | 0.545660601 |
|                                      | 0.114662417                                             | 0.817810077 | 0.791003962 | 1.078453557 |             |
| ENSG00000155252                      | 907.0579538                                             | 1019.646255 | 869.262792  |             |             |
| 1285.860124                          | 1270.26523                                              | 1060.693977 | 931.9890002 |             |             |
| 1205.606443                          | -0.371158156                                            | 0.021760041 | 0.107063326 | PI4K2A      |             |
| 10                                   | 97640686                                                | 97676434    | + 4189      |             |             |
| protein_coding                       | phosphatidylinositol 4-kinase type 2 alpha              |             |             |             |             |
| [Source:HGNC Symbol;Acc:HGNC:30031]" | -                                                       | 784         | 1100        | 889         |             |
| 1280                                 | 1390                                                    | 1081        | 10.2352962  | 11.5775398  |             |
| 9.830913082                          | 14.77409291                                             | 14.45982502 | 12.04651344 |             |             |
| ENSG00000279329                      | 12.72657843                                             | 8.342560268 | 23.46716199 |             |             |
| 23.10529911                          | 52.09001301                                             | 62.79779325 | 14.84543356 |             |             |
| 45.99770179                          | -1.631975545                                            | 0.021785904 | 0.107156086 |             |             |
| AC020910.5                           | 19                                                      | 34675717    | 34677581    | -           | 1865        |
| TEC                                  | novel transcript                                        |             | -           | 11          | 9           |
| 23                                   | 57                                                      | 64          | 0.322558553 | 0.212763748 |             |
| 0.596121604                          | 0.596279964                                             | 1.33184786  | 1.601943423 |             |             |
| ENSG00000156140                      | 93.71389573                                             | 110.3071858 | 147.6475608 |             |             |
| 86.39372709                          | 53.00387289                                             | 34.34254318 | 117.2228808 |             |             |
| 57.91338106                          | 1.019228575                                             | 0.021794854 | 0.107165626 |             |             |
| ADAMTS3                              | 4                                                       | 72280969    | 72569386    | -           | 7172        |
| protein_coding                       | ADAM metalloproteinase with thrombospondin type 1 motif |             |             |             |             |
| 3 [Source:HGNC Symbol;Acc:HGNC:219]" | -                                                       | 81          | 119         | 151         |             |
| 86                                   | 58                                                      | 35          | 0.617645741 | 0.731544313 |             |
| 0.975302017                          | 0.57977487                                              | 0.352408448 | 0.227810533 |             |             |
| ENSG00000254999                      | 2272.272731                                             | 2550.042588 | 3037.041881 |             |             |
| 2081.486076                          | 1855.135551                                             | 2228.340445 | 2619.785733 |             |             |
| 2054.987357                          | 0.350658338                                             | 0.021820271 | 0.107256104 | BRK1        |             |
| 3                                    | 10115592                                                | 10127190    | + 1233      |             |             |

|                                             |                                                                                          |             |         |             |         |                |      |        |      |      |
|---------------------------------------------|------------------------------------------------------------------------------------------|-------------|---------|-------------|---------|----------------|------|--------|------|------|
| protein_coding                              | "BRICK1, SCAR/WAVE actin nucleating complex subunit [Source:HGNC Symbol;Acc:HGNC:23057]" |             |         |             | -       | 1964           | 2751 | 3106   |      |      |
|                                             | 2072                                                                                     | 2030        | 2271    | 87.11102413 |         | 98.36972828    |      |        |      |      |
| 116.6919321                                 |                                                                                          | 81.25084588 |         | 71.74498664 |         | 85.98052517    |      |        |      |      |
| ENSG00000266066                             | 34.70885027                                                                              |             |         | 11.12341369 |         | 21.51156516    |      |        |      |      |
| 79.36167954                                 | 24.67421669                                                                              |             |         | 86.34696571 |         | 22.44794304    |      |        |      |      |
| 63.46095398                                 | -1.506208625                                                                             |             |         | 0.021829973 |         | 0.107269304    |      |        |      |      |
| POLRMTP1                                    | 17                                                                                       | 62136972    |         | 62140639    |         | -              |      | 3668   |      |      |
|                                             | processed_pseudogene RNA polymerase mitochondrial                                        |             |         |             |         |                |      |        |      |      |
| pseudogene 1                                | [Source:HGNC Symbol;Acc:HGNC:28865]                                                      |             |         |             | -       |                |      | 30     |      |      |
|                                             | 12                                                                                       | 22          | 79      | 27          | 88      | 0.447287375    |      |        |      |      |
| 0.144240054                                 | 0.277840665                                                                              |             |         | 1.041355418 |         | 0.320769476    |      |        |      |      |
| 1.119951926                                 |                                                                                          |             |         |             |         |                |      |        |      |      |
| ENSG00000105516                             | 112.2252825                                                                              |             |         | 136.2618177 |         | 215.1156516    |      |        |      |      |
| 290.3231062                                 | 222.9818101                                                                              |             |         | 246.2850954 |         | 154.5342506    |      |        |      |      |
| 253.1966705                                 | -0.710137023                                                                             |             |         | 0.021867482 |         | 0.107419088    |      | DBP    |      |      |
|                                             | 19                                                                                       | 48630030    |         | 48637438    |         | -              | 6544 |        |      |      |
| protein_coding                              | D-box binding PAR bZIP transcription factor [Source:HGNC Symbol;Acc:HGNC:2697]           |             |         |             | TF_bZIP | 97             | 147  | 220    |      |      |
|                                             | 289                                                                                      | 244         | 251     | 0.810630904 |         | 0.990394003    |      |        |      |      |
| 1.557334289                                 | 2.135284603                                                                              |             |         | 1.624819541 |         | 1.790508828    |      |        |      |      |
| ENSG00000105298                             | 551.8707193                                                                              |             |         | 910.2660203 |         | 846.7734284    |      |        |      |      |
| 929.2348554                                 | 988.7963874                                                                              |             |         | 1339.359184 |         | 769.6367227    |      |        |      |      |
| 1085.796809                                 | -0.495366592                                                                             |             |         | 0.021876914 |         | 0.107430899    |      | CACTIN |      |      |
|                                             | 19                                                                                       | 3610641     | 3626815 | -           | 5952    |                |      |        |      |      |
| protein_coding                              | "cactin, spliceosome C complex subunit [Source:HGNC Symbol;Acc:HGNC:29938]"              |             |         |             | -       | 477            | 982  | 866    | 925  | 1082 |
|                                             | 1365                                                                                     | 4.382785027 |         | 7.274154536 |         | 6.739961648    |      |        |      |      |
| 7.514152878                                 | 7.921782896                                                                              |             |         | 10.70571714 |         |                |      |        |      |      |
| ENSG00000165916                             | 4768.996027                                                                              |             |         | 4930.453118 |         | 5549.98381     |      |        |      |      |
| 4023.335779                                 | 4021.897321                                                                              |             |         | 4433.131717 |         | 5083.144319    |      |        |      |      |
| 4159.454939                                 | 0.289419839                                                                              |             |         | 0.021904429 |         | 0.107531474    |      | PSMC3  |      |      |
|                                             | 11                                                                                       | 47418769    |         | 47426473    |         | -              | 2276 |        |      |      |
| protein_coding                              | "proteasome 26S subunit, ATPase 3 [Source:HGNC Symbol;Acc:HGNC:9549]"                    |             |         |             | -       | 4122           | 5319 | 5676   | 4005 | 4401 |
|                                             | 4518                                                                                     | 99.04451791 |         | 103.0366406 |         | 115.5240976    |      |        |      |      |
| 85.08078322                                 | 84.26315355                                                                              |             |         | 92.66591208 |         |                |      |        |      |      |
| ENSG00000166086                             | 1183.571794                                                                              |             |         | 1112.341369 |         | 1447.141656    |      |        |      |      |
| 1012.614848                                 | 879.1332021                                                                              |             |         | 985.1403815 |         | 1247.68494     |      |        |      |      |
| 958.9628105                                 | 0.379951979                                                                              |             |         | 0.021937331 |         | 0.107658421    |      | JAM3   |      |      |
|                                             | 11                                                                                       | 134068925   |         | 134152001   |         | +              | 5451 |        |      |      |
| protein_coding                              | junctional adhesion molecule 3 [Source:HGNC Symbol;Acc:HGNC:15532]                       |             |         |             | -       | 1023           | 1200 | 1480   | 1008 | 962  |
|                                             | 1004                                                                                     | 10.26346875 |         | 9.705971729 |         | 12.57731648    |      |        |      |      |
| 8.940989124                                 | 7.690551553                                                                              |             |         | 8.598121278 |         |                |      |        |      |      |
| ENSG00000111642                             | 650.2124618                                                                              |             |         | 799.9588346 |         | 750.9491836    |      |        |      |      |
| 519.3669408                                 | 475.2071363                                                                              |             |         | 630.921579  |         | 733.7068266    |      |        |      |      |
| 541.8318854                                 | 0.438226781                                                                              |             |         | 0.021977658 |         | 0.107802558    |      | CHD4   |      |      |
|                                             | 12                                                                                       | 6570082     | 6614524 | -           | 12713   | protein_coding |      |        |      |      |
| chromodomain helicase DNA binding protein 4 | [Source:HGNC                                                                             |             |         |             |         |                |      |        |      |      |

|                                    |                                          |                                                                   |                |                    |      |        |
|------------------------------------|------------------------------------------|-------------------------------------------------------------------|----------------|--------------------|------|--------|
| Symbol;Acc:HGNC:1919]              | -                                        | 562                                                               | 863            | 768                | 517  | 520    |
| 643                                | 2.417591841                              | 2.992931015                                                       |                | 2.798437609        |      |        |
| 1.966272533                        | 1.782435792                              | 2.361070537                                                       |                |                    |      |        |
| ENSG00000213096                    | 360.9720428                              | 294.7704628                                                       |                | 306.0509043        |      |        |
| 161.7370937                        | 280.5549824                              | 174.6563625                                                       |                | 320.5978033        |      |        |
| 205.6494795                        | 0.63863814                               | 0.021980806                                                       |                | 0.107802558        |      | ZNF254 |
| 19                                 | 24033405                                 | 24129961                                                          |                | + 7602             |      |        |
| protein_coding                     | zinc finger protein 254                  | [Source:HGNC                                                      |                |                    |      |        |
| Symbol;Acc:HGNC:13047]             | zf-C2H2                                  | 312                                                               | 318            | 313                | 161  | 307    |
| 178                                | 2.244509467                              | 1.844306992                                                       |                | 1.907299646        |      |        |
| 1.02399828                         | 1.75982348                               | 1.093045329                                                       |                |                    |      |        |
| ENSG00000274204                    | 15.04050178                              | 5.561706845                                                       |                | 0.977798416        |      | 0      |
| 0                                  | 0                                        | 7.193335682                                                       | 0              | 5.334915412        |      |        |
| 0.02199171                         | 1                                        | AL138689.1                                                        | 13             | 106506046          |      |        |
| 106506713                          | -                                        | 668                                                               | sense_intronic | "novel transcript, |      |        |
| sense intronic to EFNB2"           |                                          | -                                                                 | 13             | 6                  | 1    | 0      |
| 0                                  | 0                                        | 1.064293972                                                       | 0.396012364    | 0.069346731        |      |        |
| 0                                  | 0                                        | 0                                                                 |                |                    |      |        |
| ENSG00000185453                    | 144.6202095                              | 346.6797267                                                       |                | 348.0962362        |      |        |
| 479.1838119                        | 434.0834418                              | 431.7348286                                                       |                | 279.7987241        |      |        |
| 448.3340274                        | -0.67748011                              | 0.022051731                                                       |                | 0.108115717        |      | ZSWIM9 |
| 19                                 | 48170692                                 | 48197620                                                          |                | + 3751             |      |        |
| protein_coding                     | zinc finger SWIM-type containing 9       | [Source:HGNC                                                      |                |                    |      |        |
| Symbol;Acc:HGNC:34495]             | -                                        | 125                                                               | 374            | 356                | 477  | 475    |
| 440                                | 1.822458559                              | 4.396008222                                                       |                | 4.396482913        |      |        |
| 6.148547484                        | 5.518297919                              | 5.475851326                                                       |                |                    |      |        |
| ENSG00000149136                    | 9580.799637                              | 10887.9681                                                        |                | 11905.67352        |      |        |
| 9267.234098                        | 7988.049188                              | 9078.205986                                                       |                | 10791.48042        |      |        |
| 8777.829758                        | 0.298064432                              | 0.022074312                                                       |                | 0.10819173         |      | SSRP1  |
| 11                                 | 57325985                                 | 57335877                                                          |                | - 6323             |      |        |
| protein_coding                     | structure specific recognition protein 1 | [Source:HGNC                                                      |                |                    |      |        |
| Symbol;Acc:HGNC:11327]             | HMG                                      | 8281                                                              | 11746          | 12176              | 9225 | 8741   |
| 9252                               | 71.62329812                              | 81.90318161                                                       |                | 89.20391463        |      |        |
| 70.54145439                        | 60.24160528                              | 68.30594091                                                       |                |                    |      |        |
| ENSG00000032219                    | 278.8277638                              | 298.4782674                                                       |                | 287.4727344        |      |        |
| 154.7050462                        | 237.6035681                              | 175.637578                                                        |                | 288.2595885        |      |        |
| 189.3153974                        | 0.605769123                              | 0.022094776                                                       |                | 0.108240336        |      | ARID4A |
| 14                                 | 58298385                                 | 58373887                                                          |                | + 7568             |      |        |
| protein_coding                     | AT-rich interaction domain 4A            | [Source:HGNC                                                      |                |                    |      |        |
| Symbol;Acc:HGNC:9885]              | ARID                                     | 241                                                               | 322            | 294                | 154  | 260    |
| 179                                | 1.741528684                              | 1.875895779                                                       |                | 1.799569661        |      |        |
| 0.983877013                        | 1.497100041                              | 1.104124237                                                       |                |                    |      |        |
| ENSG00000205918                    | 3.470885027                              | 4.634755704                                                       |                | 5.866790497        |      |        |
| 46.21059821                        | 10.05245865                              | 14.71823279                                                       |                | 4.657477076        |      |        |
| 23.66042989                        | -2.337569405                             | 0.02209839                                                        |                | 0.108240336        |      | PDPK2P |
| 16                                 | 2616121 2643296                          | -                                                                 | 4426           |                    |      |        |
| transcribed_unprocessed_pseudogene | "3-phosphoinositide dependent            | protein kinase 2, pseudogene [Source:HGNC Symbol;Acc:HGNC:49897]" |                |                    |      |        |
| -                                  | 3                                        | 5                                                                 | 6              | 46                 | 11   | 15     |
| 0.037068461                        | 0.049807249                              | 0.062797492                                                       |                | 0.50251339         |      |        |

|                                                  |                                                   |                |               |       |  |
|--------------------------------------------------|---------------------------------------------------|----------------|---------------|-------|--|
| 0.108302847                                      | 0.158207069                                       |                |               |       |  |
| ENSG00000143248                                  | 24.29619519                                       | 31.51633879    | 30.3117509    |       |  |
| 53.24264577                                      | 74.02265007                                       | 67.70387084    | 28.70809496   |       |  |
| 64.98972223                                      | -1.176635514                                      | 0.02210826     | 0.108246237   | RGS5  |  |
| 1                                                | 163111121                                         | 163321791      | - 6821        |       |  |
| protein_coding                                   | regulator of G protein signaling 5 [Source:HGNC   |                |               |       |  |
| Symbol;Acc:HGNC:10001]                           | -                                                 | 21 34          | 31 53         | 81    |  |
| 69                                               | 0.168370483                                       | 0.219768187    | 0.210531023   |       |  |
| 0.375689482                                      | 0.51748238                                        | 0.472222936    |               |       |  |
| ENSG00000269713                                  | 1189.356603                                       | 1219.867701    | 972.9094241   |       |  |
| 1544.036727                                      | 1578.236008                                       | 1266.749236    | 1127.377909   |       |  |
| 1463.007324                                      | -0.376156341                                      | 0.022122528    | 0.108246237   | NBPF9 |  |
| 1                                                | 149054027                                         | 149103561      | - 9046        |       |  |
| protein_coding                                   | NBPF member 9 [Source:HGNC Symbol;Acc:HGNC:31991] |                |               |       |  |
| -                                                | 1028 1316                                         | 995 1537       | 1727 1291     |       |  |
| 6.214858485                                      | 6.414063628                                       | 5.095290541    | 8.215206805   |       |  |
| 8.319444941                                      | 6.662169758                                       |                |               |       |  |
| ENSG00000118246                                  | 1365.214777                                       | 1179.081851    | 1125.445977   |       |  |
| 1570.155761                                      | 1520.662836                                       | 1543.452012    | 1223.247535   |       |  |
| 1544.75687                                       | -0.337197505                                      | 0.022134207    | 0.108246237   |       |  |
| FASTKD2 2                                        | 206765357                                         | 206792509      | + 6079        |       |  |
| protein_coding                                   | FAST kinase domains 2 [Source:HGNC                |                |               |       |  |
| Symbol;Acc:HGNC:29160]                           | -                                                 | 1180 1272      | 1151 1563     | 1664  |  |
| 1573                                             | 10.61560075                                       | 9.225479028    | 8.77092982    |       |  |
| 12.43162929                                      | 11.92833359                                       | 12.07932357    |               |       |  |
| ENSG00000166925                                  | 430.3897434                                       | 858.3567564    | 639.4801642   |       |  |
| 847.8640194                                      | 1005.245865                                       | 915.4740797    | 642.7422213   |       |  |
| 922.8613214                                      | -0.520471385                                      | 0.02213457     | 0.108246237   |       |  |
| TSC22D4 7                                        | 100463359                                         | 100479279      | - 3715        |       |  |
| protein_coding                                   | TSC22 domain family member 4 [Source:HGNC         |                |               |       |  |
| Symbol;Acc:HGNC:21696]                           | TSC22                                             | 372 926        | 654 844       | 1100  |  |
| 933                                              | 5.476194119                                       | 10.98970732    | 8.154951566   |       |  |
| 10.98461513                                      | 12.90305251                                       | 11.72381243    |               |       |  |
| ENSG00000067177                                  | 338.989771                                        | 507.042274     | 335.3848567   |       |  |
| 562.5638043                                      | 580.3010222                                       | 534.7624581    | 393.8056339   |       |  |
| 559.2090949                                      | -0.50460531                                       | 0.022134999    | 0.108246237   | PHKA1 |  |
| X                                                | 72578814                                          | 72714319       | - 6350        |       |  |
| protein_coding                                   | phosphorylase kinase regulatory subunit alpha 1   |                |               |       |  |
| [Source:HGNC Symbol;Acc:HGNC:8925]               | -                                                 |                | 293 547       | 343   |  |
| 560                                              | 635 545                                           | 2.523414579    | 3.797935274   |       |  |
| 2.502204787                                      | 4.263983527                                       | 4.357712735    | 4.006533818   |       |  |
| ENSG00000228485                                  | 2.313923351                                       | 8.342560268    | 9.777984162   | 0     |  |
| 0                                                | 0 6.81148926                                      | 0              | 5.264014799   |       |  |
| 0.022228435                                      | 1 GRK5-IT1                                        | 10             | 119208531     |       |  |
| 119211760                                        | + 400                                             | sense_intronic | GRK5 intronic |       |  |
| transcript 1 [Source:HGNC Symbol;Acc:HGNC:49478] | -                                                 |                |               | 2     |  |
| 9                                                | 10 0                                              | 0 0            | 0.273441682   |       |  |
| 0.992010973                                      | 1.158090408                                       | 0 0            | 0             |       |  |
| ENSG00000115310                                  | 8051.296301                                       | 8827.355714    | 7764.697223   |       |  |
| 10447.61351                                      | 9521.506063                                       | 9752.301048    | 8214.449746   |       |  |

|                                                             |                                                     |             |                  |             |
|-------------------------------------------------------------|-----------------------------------------------------|-------------|------------------|-------------|
| 9907.140207                                                 | -0.270243322                                        | 0.022254392 | 0.108795295      | RTN4        |
| 2                                                           | 54972187                                            | 55112621    | - 6644           |             |
| protein_coding                                              | reticulon 4 [Source:HGNC Symbol;Acc:HGNC:14085]     |             |                  | -           |
| 6959                                                        | 9523 7941                                           | 10400 10419 | 9939 57.28117598 |             |
|                                                             | 63.1943307                                          | 55.36662209 | 75.68414899      | 68.3368588  |
|                                                             | 69.83274322                                         |             |                  |             |
| ENSG00000166272                                             | 1071.346512                                         | 926.9511408 | 1147.935341      |             |
| 1379.285899                                                 | 1299.508746                                         | 1333.471891 | 1048.744331      |             |
| 1337.422178                                                 | -0.350998029                                        | 0.022275224 | 0.108862326      | WBP1L       |
| 10                                                          | 102743901                                           | 102834516   | + 7880           |             |
| protein_coding                                              | WW domain binding protein 1 like [Source:HGNC       |             |                  |             |
| Symbol;Acc:HGNC:23510]                                      | -                                                   | 926 1000    | 1174 1373        | 1422        |
| 1359                                                        | 6.426573545                                         | 5.595098551 | 6.901513395      |             |
| 8.424527189                                                 | 7.863791256                                         | 8.050804396 |                  |             |
| ENSG00000163590                                             | 323.9492692                                         | 323.5059482 | 305.0731058      |             |
| 484.206703                                                  | 378.3379893                                         | 471.9646649 | 317.5094411      |             |
| 444.8364524                                                 | -0.486186254                                        | 0.022287796 | 0.108888954      | PPM1L       |
| 3                                                           | 160755602                                           | 161078907   | + 12447          |             |
| protein_coding                                              | "protein phosphatase, Mg2+/Mn2+ dependent 1L        |             |                  |             |
| [Source:HGNC Symbol;Acc:HGNC:16381]"                        | -                                                   | 280         | 349              | 312         |
| 482                                                         | 414 481                                             | 1.230234932 | 1.236216954      |             |
| 1.161160785                                                 | 1.872335041                                         | 1.449419999 | 1.803958003      |             |
| ENSG00000133065                                             | 1173.159139                                         | 1303.293304 | 1352.29521       |             |
| 1724.860807                                                 | 1643.12006                                          | 1470.842064 | 1276.249218      |             |
| 1612.940977                                                 | -0.33740798                                         | 0.022318699 | 0.108969688      |             |
| SLC41A1 1                                                   | 205789093                                           | 205813748   | - 6357           |             |
| protein_coding                                              | solute carrier family 41 member 1 [Source:HGNC      |             |                  |             |
| Symbol;Acc:HGNC:19429]                                      | -                                                   | 1014 1406   | 1383 1717        | 1798        |
| 1499                                                        | 8.723292928                                         | 9.75140215  | 10.07795522      |             |
| 13.059282                                                   | 12.32525955                                         | 11.00767142 |                  |             |
| ENSG00000166012                                             | 2577.710613                                         | 2635.322093 | 2216.669009      |             |
| 2009.156444                                                 | 2029.682788                                         | 1956.543746 | 2476.567239      |             |
| 1998.460993                                                 | 0.309376112                                         | 0.022324508 | 0.108969688      | TAF1D       |
| 11                                                          | 93729948                                            | 93784391    | - 8420           |             |
| protein_coding                                              | "TATA-box binding protein associated factor, RNA    |             |                  |             |
| polymerase I subunit D [Source:HGNC Symbol;Acc:HGNC:28759]" | -                                                   |             |                  |             |
| 2228                                                        | 2843 2267                                           | 2000 2221   | 1994 14.47097548 |             |
|                                                             | 14.88670993                                         | 12.47216605 | 11.48468587      | 11.49463181 |
|                                                             | 11.05500894                                         |             |                  |             |
| ENSG00000108423                                             | 197.8404465                                         | 223.3952249 | 219.0268452      |             |
| 139.6363729                                                 | 156.270039                                          | 107.9337071 | 213.4208389      |             |
| 134.613373                                                  | 0.664883214                                         | 0.022325706 | 0.108969688      | TUBD1       |
| 17                                                          | 59859482                                            | 59892945    | - 3330           |             |
| protein_coding                                              | tubulin delta 1 [Source:HGNC Symbol;Acc:HGNC:16811] |             |                  |             |
| -                                                           | 171 241                                             | 224 139     | 171 110          |             |
| 2.808319979                                                 | 3.190852779                                         | 3.116063079 | 2.018235232      |             |
| 2.237744378                                                 | 1.54203591                                          |             |                  |             |
| ENSG00000099795                                             | 1290.012268                                         | 1862.244842 | 1893.995532      |             |
| 2111.623423                                                 | 1952.918558                                         | 2664.981351 | 1682.084214      |             |
| 2243.174444                                                 | -0.414660362                                        | 0.022341945 | 0.109014143      | NDUFB7      |

|                    |                                                                                                |             |           |             |                  |
|--------------------|------------------------------------------------------------------------------------------------|-------------|-----------|-------------|------------------|
| 19                 | 14566078                                                                                       | 14572062    | -         | 531         |                  |
| protein_coding     | NADH:ubiquinone oxidoreductase subunit B7 [Source:HGNC Symbol;Acc:HGNC:7702]                   | -           | 1115 2009 | 1937 2102   | 2137             |
| 2716               | 114.8352074                                                                                    | 166.8089596 |           | 168.9808753 |                  |
| 191.3988866        | 175.3753694                                                                                    | 238.7708362 |           |             |                  |
| ENSG00000125734    | 857.3086017                                                                                    | 799.9588346 |           | 961.1758431 |                  |
| 1310.97458         | 1029.006222                                                                                    | 1082.280718 |           | 872.8144264 |                  |
| 1140.75384         | -0.38606207                                                                                    | 0.0223723   |           | 0.109127427 | GPR108           |
| 19                 | 6729914 6737603                                                                                | -           | 3213      |             | protein_coding G |
| protein-coupled    | receptor 108 [Source:HGNC Symbol;Acc:HGNC:17829]                                               |             |           |             |                  |
| -                  | 741 863                                                                                        | 983 1305    |           | 1126 1103   |                  |
| 12.6125295         | 11.84224463                                                                                    | 14.17246027 |           | 19.63816943 |                  |
| 15.27166057        | 16.02547174                                                                                    |             |           |             |                  |
| ENSG00000127054    | 2392.596745                                                                                    | 2804.954152 |           | 2775.969703 |                  |
| 3541.138233        | 2806.463684                                                                                    | 3771.792457 |           | 2657.8402   |                  |
| 3373.131458        | -0.343496188                                                                                   | 0.022386089 |           | 0.109159853 | INTS11           |
| 1                  | 1311585 1324691                                                                                | -           | 8220      |             | protein_coding   |
| integrator complex | subunit 11 [Source:HGNC Symbol;Acc:HGNC:26052]                                                 |             |           |             |                  |
| -                  | 2068 3026                                                                                      | 2839 3525   |           | 3071 3844   |                  |
| 13.75857418        | 16.2304688                                                                                     | 15.9991176  |           | 20.73425905 |                  |
| 16.28045719        | 21.8301941                                                                                     |             |           |             |                  |
| ENSG00000278959    | 0 3.707804563                                                                                  | 0.977798416 |           | 9.041203998 |                  |
| 23.76035681        | 11.77458623                                                                                    | 1.56186766  |           | 14.85871568 |                  |
| -3.208860031       | 0.022388357                                                                                    | 1           |           | AC006378.2  | 7                |
| 93954044           | 93956519                                                                                       | -           |           | 2476        | TEC tec          |
| -                  | 0 4 1                                                                                          | 9           |           | 26          | 12 0             |
| 0.07122678         | 0.018709053                                                                                    | 0.17574909  |           | 0.457595037 |                  |
| 0.226243777        |                                                                                                |             |           |             |                  |
| ENSG00000267787    | 86.77212568                                                                                    | 64.88657986 |           | 82.13506696 |                  |
| 158.7233591        | 153.5284594                                                                                    | 104.0088451 |           | 77.9312575  |                  |
| 138.7535545        | -0.83418435                                                                                    | 0.022402174 |           | 0.109203453 |                  |
| AC027097.2         | 18 57639455                                                                                    | 57738603    |           | +           | 2670             |
| antisense          | "novel transcript, antisense to ATP8B1"                                                        |             |           |             | -                |
| 75 70              | 84 158 168                                                                                     | 106         |           | 1.536189226 |                  |
| 1.155901259        | 1.457372199                                                                                    | 2.861192264 |           | 2.741931609 |                  |
| 1.853278296        |                                                                                                |             |           |             |                  |
| ENSG00000164062    | 2595.065039                                                                                    | 2942.142921 |           | 2893.305513 |                  |
| 2094.545593        | 2238.9567                                                                                      | 2469.719463 |           | 2810.171158 |                  |
| 2267.740585        | 0.309595571                                                                                    | 0.022419245 |           | 0.109241451 | APEH             |
| 3                  | 49674002                                                                                       | 49683963    |           | +           | 4669             |
| protein_coding     | acylaminoacyl-peptide hydrolase [Source:HGNC Symbol;Acc:HGNC:586]                              | -           | 2243 3174 | 2959 2085   | 2450             |
| 2517               | 26.27242206                                                                                    | 29.97208851 |           | 29.35780267 |                  |
| 21.5915292         | 22.86655858                                                                                    | 25.16548921 |           |             |                  |
| ENSG00000100416    | 894.3313753                                                                                    | 1016.865402 |           | 1208.558842 |                  |
| 784.5755914        | 606.8029586                                                                                    | 900.7558469 |           | 1039.91854  |                  |
| 764.044799         | 0.445476699                                                                                    | 0.022424261 |           | 0.109241451 | TRMU             |
| 22                 | 46330875                                                                                       | 46357340    |           | +           | 9219             |
| protein_coding     | tRNA 5-methylaminomethyl-2-thiouridylate methyltransferase [Source:HGNC Symbol;Acc:HGNC:25481] | -           |           |             | 773              |

|                                     |                                                                              |      |             |             |               |        |
|-------------------------------------|------------------------------------------------------------------------------|------|-------------|-------------|---------------|--------|
| 1097                                | 1236                                                                         | 781  | 664         | 918         | 4.585539002   |        |
| 5.246344084                         | 6.210650804                                                                  |      | 4.096080049 |             | 3.138649806   |        |
| 4.648415087                         |                                                                              |      |             |             |               |        |
| ENSG00000253390                     | 19.66834849                                                                  |      | 12.97731597 |             | 15.64477466   | 0      |
| 0                                   | 4.906077597                                                                  |      | 16.09681304 |             | 1.635359199   |        |
| 3.305456755                         | 0.022431077                                                                  |      | 1           | AC104561.1  | 8             |        |
| 23458601                            | 23484971                                                                     |      | +           | 630         | lincRNA novel |        |
| transcript                          | -                                                                            | 17   | 14          | 16          | 0             | 5      |
| 1.475717015                         | 0.979763924                                                                  |      |             | 1.176472795 | 0             | 0      |
| 0.370489147                         |                                                                              |      |             |             |               |        |
| ENSG00000234383                     | 3.470885027                                                                  |      | 7.415609127 |             | 2.933395248   |        |
| 71.32505376                         | 12.79403828                                                                  |      | 1.962431039 |             | 4.606629801   |        |
| 28.69384103                         | -2.630137012                                                                 |      | 0.022439073 |             | 0.109278786   |        |
| CTBP2P8 1                           | 68161761                                                                     |      | 68163090    |             | -             | 1330   |
| processed_pseudogene                | C-terminal binding protein 2 pseudogene                                      |      |             |             |               | 8      |
| [Source:HGNC Symbol;Acc:HGNC:45200] |                                                                              |      | -           |             | 3             | 8      |
| 71                                  | 14                                                                           | 2    | 0.12335715  |             | 0.265199258   | 3      |
| 0.10448936                          | 2.581118385                                                                  |      | 0.458706604 |             | 0.070197944   |        |
| ENSG00000064763                     | 217.508795                                                                   |      | 235.4455898 |             | 219.0268452   |        |
| 133.6089035                         | 166.3224977                                                                  |      | 134.4265262 |             | 223.9937433   |        |
| 144.7859758                         | 0.629141899                                                                  |      | 0.022458253 |             | 0.109337362   | FAR2   |
| 12                                  | 29149103                                                                     |      | 29340980    |             | +             | 5411   |
| protein_coding                      | fatty acyl-CoA reductase 2                                                   |      |             |             |               |        |
| Symbol;Acc:HGNC:25531]              | -                                                                            |      | 188         | 254         | 224           | 133    |
| 137                                 | 1.900093744                                                                  |      | 2.069617751 |             | 1.917665876   | 182    |
| 1.188434699                         | 1.465724853                                                                  |      | 1.181922687 |             |               |        |
| ENSG00000131446                     | 1774.779211                                                                  |      | 2500.914178 |             | 2979.351774   |        |
| 2948.437082                         | 3283.49854                                                                   |      | 3359.681939 |             | 2418.348388   |        |
| 3197.205853                         | -0.402378216                                                                 |      | 0.022577021 |             | 0.109880586   | MGAT1  |
| 5                                   | 180784782                                                                    |      | 180815652   |             | -             | 11576  |
| protein_coding                      | "mannosyl (alpha-1,3-)-glycoprotein beta-1,2-N-acetylglucosaminyltransferase |      |             |             |               |        |
| [Source:HGNC Symbol;Acc:HGNC:7044]" |                                                                              |      |             |             |               |        |
| -                                   | 1534                                                                         | 2698 | 3047        | 2935        | 3593          | 3424   |
| 7.247054949                         | 10.27584122                                                                  |      | 12.19316335 |             | 12.25888029   |        |
| 13.52562358                         | 13.80769781                                                                  |      |             |             |               |        |
| ENSG00000143537                     | 1329.348965                                                                  |      | 1810.335578 |             | 2202.002033   |        |
| 1247.686152                         | 1062.819037                                                                  |      | 1576.81334  |             | 1780.562192   |        |
| 1295.772843                         | 0.459090157                                                                  |      | 0.022611265 |             | 0.110012223   | ADAM15 |
| 1                                   | 155050566                                                                    |      | 155062775   |             | +             | 6584   |
| protein_coding                      | ADAM metalloproteinase domain 15                                             |      |             |             |               |        |
| Symbol;Acc:HGNC:193]                | -                                                                            |      | 1149        | 1953        | 2252          | 1242   |
| 1607                                | 9.543878882                                                                  |      | 13.07815195 |             | 15.84459051   | 1163   |
| 9.120801207                         | 7.697478602                                                                  |      | 11.39389179 |             |               |        |
| ENSG00000131238                     | 4598.922661                                                                  |      | 4682.957164 |             | 4853.791338   |        |
| 3741.049299                         | 3810.795689                                                                  |      | 4141.710708 |             | 4711.890387   |        |
| 3897.851898                         | 0.273672441                                                                  |      | 0.02263538  |             | 0.110065042   | PPT1   |
| 1                                   | 40071461                                                                     |      | 40097727    |             | -             | 5088   |
| protein_coding                      | palmitoyl-protein thioesterase 1                                             |      |             |             |               |        |
| Symbol;Acc:HGNC:9325]               | -                                                                            |      | 3975        | 5052        | 4964          | 3724   |
| 4221                                | 42.72526284                                                                  |      | 43.77742344 |             | 45.19466025   | 4170   |

|                                                 |                                                 |                      |                  |             |  |  |
|-------------------------------------------------|-------------------------------------------------|----------------------|------------------|-------------|--|--|
| 35.38863294                                     | 35.71474471                                     | 38.72703833          |                  |             |  |  |
| ENSG00000163399                                 | 9861.941324                                     | 10598.75934          | 12490.39697      |             |  |  |
| 9560.570939                                     | 7404.092727                                     | 9300.941909          | 10983.69921      |             |  |  |
| 8755.201858                                     | 0.327246576                                     | 0.022636521          | 0.110065042      | ATP1A1      |  |  |
| 1                                               | 116372668                                       | 116410261            | + 7261           |             |  |  |
| protein_coding                                  | ATPase Na+/K+ transporting subunit alpha 1      |                      |                  |             |  |  |
| [Source:HGNC Symbol;Acc:HGNC:799]               |                                                 | -                    | 8524 11434       | 12774       |  |  |
| 9517                                            | 8102 9479                                       | 64.20098881          | 69.42816854      |             |  |  |
| 81.49536906                                     | 63.37308499                                     | 48.62441617          | 60.94135725      |             |  |  |
| ENSG00000157657                                 | 406.0935482                                     | 445.8634987          | 717.7040375      |             |  |  |
| 455.0739346                                     | 272.3302435                                     | 291.4210093          | 523.2203615      |             |  |  |
| 339.6083958                                     | 0.624653705                                     | 0.022648827          | 0.110089862      | ZNF618      |  |  |
| 9                                               | 113876282                                       | 114056591            | + 10384          |             |  |  |
| protein_coding                                  | zinc finger protein 618 [Source:HGNC            |                      |                  |             |  |  |
| Symbol;Acc:HGNC:29416]                          | zf-C2H2                                         | 351 481              | 734 453          | 298         |  |  |
| 297                                             | 1.848575317                                     | 2.042275629          | 3.274415868      |             |  |  |
| 2.109282449                                     | 1.250576267                                     | 1.335173812          |                  |             |  |  |
| ENSG00000248926                                 | 0 0                                             | 0 11.05036044        | 13.70789816      |             |  |  |
| 0                                               | 0                                               | 8.252752868          | -5.465359099     | 0.022654535 |  |  |
| 1                                               | AC114801.2                                      | 4                    | 77958000         | 77958780    |  |  |
| -                                               | 781                                             | processed_pseudogene | FUS interacting  |             |  |  |
| protein (serine/arginine-rich) 1 (FUSIP1)       | pseudogene                                      | -                    | 0                | 0           |  |  |
| 0                                               | 0                                               | 11 15                | 0 0              | 0 0         |  |  |
| 0.680993345                                     | 0.836948669                                     | 0                    |                  |             |  |  |
| ENSG00000182327                                 | 6.941770054                                     | 24.10072966          | 43.02313031      |             |  |  |
| 60.27469332                                     | 76.7642297                                      | 63.77900877          | 24.68854334      |             |  |  |
| 66.9393106                                      | -1.431161635                                    | 0.022657611          | 0.110097554      | GLTPD2      |  |  |
| 17                                              | 4788959 4790390                                 | + 1023               | protein_coding   |             |  |  |
| glycolipid transfer protein domain containing 2 | [Source:HGNC                                    |                      |                  |             |  |  |
| Symbol;Acc:HGNC:33756]                          | -                                               | 6 26                 | 44 60            | 84          |  |  |
| 65                                              | 0.320752706                                     | 1.120551115          | 1.992413605      |             |  |  |
| 2.835808064                                     | 3.578180545                                     | 2.966086135          |                  |             |  |  |
| ENSG00000132768                                 | 1707.675433                                     | 2168.138718          | 2083.688425      |             |  |  |
| 2797.750348                                     | 2240.784419                                     | 2541.348195          | 1986.500859      |             |  |  |
| 2526.627654                                     | -0.346437232                                    | 0.022692853          | 0.110233758      | DPH2        |  |  |
| 1                                               | 43970000                                        | 43973369             | + 2930           |             |  |  |
| protein_coding                                  | DPH2 homolog [Source:HGNC Symbol;Acc:HGNC:3004] |                      |                  | -           |  |  |
| 1476                                            | 2339 2131                                       | 2785 2452            | 2590 27.54948279 |             |  |  |
| 35.19626342                                     | 33.69134006                                     | 45.95775395          | 36.46795777      |             |  |  |
| 41.2646513                                      |                                                 |                      |                  |             |  |  |
| ENSG00000130921                                 | 363.2859662                                     | 329.9946061          | 412.6309316      |             |  |  |
| 234.0667257                                     | 256.7946256                                     | 280.6276386          | 368.637168       |             |  |  |
| 257.1629966                                     | 0.519321288                                     | 0.022715736          | 0.110309864      |             |  |  |
| C12orf65                                        | 12                                              | 123232916            | 123257959        | + 7090      |  |  |
| protein_coding                                  | chromosome 12 open reading frame 65             |                      |                  |             |  |  |
| [Source:HGNC Symbol;Acc:HGNC:26784]             |                                                 | -                    | 314 356          | 422         |  |  |
| 233                                             | 281 286                                         | 2.422022234          | 2.213796624      |             |  |  |
| 2.757202551                                     | 1.588952455                                     | 1.727104765          | 1.883067265      |             |  |  |
| ENSG00000279118                                 | 46.27846703                                     | 50.05536161          | 59.64570339      |             |  |  |
| 26.11903377                                     | 13.70789816                                     | 21.58674143          | 51.99317734      |             |  |  |



|                                     |                                                 |                |                           |        |
|-------------------------------------|-------------------------------------------------|----------------|---------------------------|--------|
| 20.47122445                         | 1.347951449                                     | 0.022788194    | 0.110626586               |        |
| AC093535.2                          | 5                                               | 126496279      | 126498604                 | 2326   |
| TEC                                 | tec                                             | -              | 40 54 61 26               | 15     |
| 22                                  | 0.940470102                                     | 1.023571081    | 1.214849783               |        |
| 0.540461614                         | 0.281021887                                     | 0.441528769    |                           |        |
| ENSG00000223343                     | 2.313923351                                     | 5.561706845    | 18.57816991               | 0      |
| 0                                   | 0.981215519                                     | 8.817933368    | 0.32707184                |        |
| 4.674472718                         | 0.022857029                                     | 1              | AC137630.1 3              |        |
| 48985049                            | 48989988                                        | -              | 782 antisense             | novel  |
| transcript                          | -                                               | 2              | 6 19 0 0                  | 1      |
| 0.139867868                         | 0.338281662                                     | 1.125509859    | 0                         | 0      |
| 0.059695182                         |                                                 |                |                           |        |
| ENSG00000144824                     | 517.161869                                      | 568.2210493    | 490.8548049               |        |
| 301.3734666                         | 468.8101171                                     | 335.5757077    | 525.4125744               |        |
| 368.5864305                         | 0.510820756                                     | 0.022870775    | 0.110992234               | PHLDB2 |
| 3                                   | 111732497                                       | 111976517      | + 12309                   |        |
| protein_coding                      | pleckstrin homology like domain family B member |                |                           | 2      |
| [Source:HGNC Symbol;Acc:HGNC:29573] |                                                 | -              | 447 613                   | 502    |
| 300                                 | 513 342                                         | 1.986001006    | 2.19569322                |        |
| 1.88922377                          | 1.178418901                                     | 1.816156173    | 1.297028055               |        |
| ENSG0000010610                      | 3.470885027                                     | 2.780853423    | 20.53376674               | 0      |
| 0                                   | 0.981215519                                     | 8.92850173     | 0.32707184                |        |
| 4.691399273                         | 0.022936612                                     | 1              | CD4 12 6786858            |        |
| 6820808 +                           | 4583                                            | protein_coding | CD4 molecule [Source:HGNC |        |
| Symbol;Acc:HGNC:1678]               | -                                               | 3 3            | 21 0 0                    |        |
| 1                                   | 0.035798606                                     | 0.0288606      | 0.212261825               | 0      |
| 0                                   | 0.010185824                                     |                |                           |        |
| ENSG00000198743                     | 7237.952243                                     | 4932.30702     | 5094.329748               |        |
| 8416.356344                         | 6520.390225                                     | 7437.613638    | 5754.863004               |        |
| 7458.120069                         | -0.374221157                                    | 0.022946756    | 0.111268902               | SLC5A3 |
| 21                                  | 34073570                                        | 34106262       | + 11576                   |        |
| protein_coding                      | solute carrier family 5 member 3                |                |                           |        |
| [Source:HGNC Symbol;Acc:HGNC:11038] | -                                               | 6256 5321      | 5210 8378                 | 7135   |
| 7580                                | 29.55513413                                     | 20.26603082    | 20.8488287                |        |
| 34.99315129                         | 26.85926086                                     | 30.56727495    |                           |        |
| ENSG00000119900                     | 1349.017314                                     | 1490.537434    | 1739.503382               |        |
| 1235.631213                         | 1179.793102                                     | 1178.439839    | 1526.35271                |        |
| 1197.954718                         | 0.349918207                                     | 0.02295255     | 0.111268902               | OGFRL1 |
| 6                                   | 71288803                                        | 71308950       | + 9075                    |        |
| protein_coding                      | opioid growth factor receptor like 1            |                |                           |        |
| [Source:HGNC Symbol;Acc:HGNC:21378] | -                                               | 1166 1608      | 1779 1230                 | 1291   |
| 1201                                | 7.02662262                                      | 7.81220028     | 9.080960157               |        |
| 6.553294635                         | 6.199236519                                     | 6.17792184     |                           |        |
| ENSG00000167635                     | 3269.573696                                     | 2584.339781    | 2726.101984               |        |
| 2285.415455                         | 2369.638662                                     | 2221.471936    | 2860.005154               |        |
| 2292.175351                         | 0.318902509                                     | 0.022956245    | 0.111268902               | ZNF146 |
| 19                                  | 36214602                                        | 36238774       | + 4146                    |        |
| protein_coding                      | zinc finger protein 146                         |                |                           |        |
| [Source:HGNC Symbol;Acc:HGNC:12931] | zf-C2H2                                         | 2826 2788      | 2788 2275                 | 2593   |
| 2264                                | 37.27670978                                     | 29.64813842    | 31.15056495               |        |

|                                                     |                                                      |             |             |             |                |        |
|-----------------------------------------------------|------------------------------------------------------|-------------|-------------|-------------|----------------|--------|
| 26.53098168                                         | 27.25409822                                          | 25.49136906 |             |             |                |        |
| ENSG00000272070                                     | 47.4354287                                           | 15.75816939 | 32.26734773 |             |                |        |
| 73.33421021                                         | 82.24738897                                          | 65.7414398  | 31.82031528 |             |                |        |
| 73.77434633                                         | -1.221342581                                         | 0.022956899 | 0.111268902 |             |                |        |
| AC005618.1                                          | 5                                                    | 141326210   | 141329357   | +           |                | 3148   |
| lincRNA                                             | novel transcript                                     | -           | 41          | 17          |                | 33     |
| 73                                                  | 90                                                   | 67          | 0.712268677 | 0.238093838 |                |        |
| 0.485603348                                         | 1.121216171                                          | 1.245851799 | 0.993541735 |             |                |        |
| ENSG00000186312                                     | 171.230328                                           | 196.5136419 | 219.0268452 |             |                |        |
| 380.7351461                                         | 249.4837465                                          | 268.8530523 | 195.5902717 |             |                |        |
| 299.6906483                                         | -0.614066116                                         | 0.022977078 | 0.111331406 |             |                | CA5BP1 |
| X                                                   | 15674932                                             | 15703724    | +           | 2409        |                |        |
| transcribed_unprocessed_pseudogene                  | carbonic anhydrase 5B                                |             |             |             |                |        |
| pseudogene 1 [Source:HGNC Symbol;Acc:HGNC:29544]    | -                                                    |             |             |             |                | 148    |
| 212                                                 | 224                                                  | 379         | 273         | 274         | 3.359847983    |        |
| 3.880011554                                         | 4.307384829                                          | 7.606828526 | 4.938379314 |             |                |        |
| 5.309575475                                         |                                                      |             |             |             |                |        |
| ENSG00000105656                                     | 492.8656739                                          | 725.8027433 | 702.0592628 |             |                |        |
| 752.4290883                                         | 964.1221707                                          | 917.4365107 | 640.24256   |             |                |        |
| 877.9959232                                         | -0.454550524                                         | 0.023002379 | 0.111418684 |             |                | ELL    |
| 19                                                  | 18442663                                             | 18522127    | -           | 4929        |                |        |
| protein_coding                                      | elongation factor for RNA polymerase II [Source:HGNC |             |             |             |                |        |
| Symbol;Acc:HGNC:23114]                              | -                                                    | 426         | 783         | 718         | 749            | 1055   |
| 935                                                 | 4.726563465                                          | 7.003851057 | 6.74789136  |             |                |        |
| 7.347239824                                         | 9.327220401                                          | 8.855209259 |             |             |                |        |
| ENSG00000118680                                     | 4207.869615                                          | 4055.411241 | 3892.615495 |             |                |        |
| 2983.597319                                         | 3648.128631                                          | 3258.61674  | 4051.96545  |             |                |        |
| 3296.780897                                         | 0.297386891                                          | 0.02302392  | 0.111481684 |             |                | MYL12B |
| 18                                                  | 3261479                                              | 3278431     | +           | 1932        | protein_coding | myosin |
| light chain 12B [Source:HGNC Symbol;Acc:HGNC:29827] | -                                                    |             |             |             |                | 3637   |
| 4375                                                | 3981                                                 | 2970        | 3992        | 3321        | 102.9510764    |        |
| 99.84007377                                         | 95.45254479                                          | 74.32767425 | 90.04135217 |             |                |        |
| 80.24311683                                         |                                                      |             |             |             |                |        |
| ENSG00000184517                                     | 492.8656739                                          | 393.9542349 | 484.010216  |             |                |        |
| 258.1766031                                         | 406.6676454                                          | 268.8530523 | 456.9433749 |             |                |        |
| 311.2324336                                         | 0.552611098                                          | 0.02302997  | 0.111481684 |             |                | ZFP1   |
| 16                                                  | 75148492                                             | 75172236    | +           | 3761        |                |        |
| protein_coding                                      | ZFP1 zinc finger protein [Source:HGNC                |             |             |             |                |        |
| Symbol;Acc:HGNC:23328]                              | zf-C2H2                                              | 426         | 425         | 495         | 257            | 445    |
| 274                                                 | 6.194424706                                          | 4.982181613 | 6.096833309 |             |                |        |
| 3.303931286                                         | 5.156028097                                          | 3.400895326 |             |             |                |        |
| ENSG00000174132                                     | 173.5442514                                          | 233.5916875 | 181.8705054 |             |                |        |
| 232.0575693                                         | 321.6786769                                          | 349.3127249 | 196.3354814 |             |                |        |
| 301.0163237                                         | -0.615447681                                         | 0.023046874 | 0.111528194 |             |                |        |
| FAM174A 5                                           | 100535305                                            | 100586741   | +           | 1416        |                |        |
| protein_coding                                      | family with sequence similarity 174 member A         |             |             |             |                |        |
| [Source:HGNC Symbol;Acc:HGNC:24943]                 | -                                                    |             |             | 150         | 252            | 186    |
| 231                                                 | 352                                                  | 356         | 5.793255978 | 7.846414476 |                |        |
| 6.084881804                                         | 7.887691985                                          | 10.83273222 | 11.73634265 |             |                |        |
| ENSG00000170004                                     | 2763.981443                                          | 2968.097553 | 3960.083585 |             |                |        |

|                                                                      |              |             |             |                |
|----------------------------------------------------------------------|--------------|-------------|-------------|----------------|
| 2735.466499                                                          | 2237.12898   | 2535.460902 | 3230.720861 |                |
| 2502.68546                                                           | 0.368643847  | 0.023063555 | 0.111573595 | CHD3           |
| 17                                                                   | 7884806      | 7912760 +   | 9758        | protein_coding |
| chromodomain helicase DNA binding protein 3 [Source:HGNC             |              |             |             |                |
| Symbol;Acc:HGNC:1918]                                                | -            | 2389        | 3202        | 4050 2723 2448 |
| 2584                                                                 | 13.3890588   | 14.46753267 | 19.22634209 |                |
| 13.49236384                                                          | 10.93224101  | 12.36168667 |             |                |
| ENSG00000177548                                                      | 520.6327541  | 774.0042026 | 799.8391044 |                |
| 885.0334136                                                          | 894.66882    | 1096.998951 | 698.158687  |                |
| 958.9003948                                                          | -0.456586472 | 0.02317876  | 0.112095447 | RABEP2         |
| 16                                                                   | 28904421     | 28936526    | -           | 4566           |
| protein_coding "rabaptin, RAB GTPase binding effector protein 2      |              |             |             |                |
| [Source:HGNC Symbol;Acc:HGNC:24817]"                                 |              |             |             |                |
| -                                                                    |              | 450         | 835         | 818            |
| 881                                                                  | 979          | 1118        | 5.389783485 | 8.062774736    |
| 8.298887022                                                          | 9.329131564  | 9.343409479 | 11.43015006 |                |
| ENSG00000183684                                                      | 2306.981581  | 3073.769983 | 2851.260182 |                |
| 2114.637157                                                          | 2260.889337  | 2164.561436 | 2744.003915 |                |
| 2180.02931                                                           | 0.332282788  | 0.023190147 | 0.112115045 | ALYREF         |
| 17                                                                   | 81887844     | 81891586    | -           | 1574           |
| protein_coding Aly/REF export factor [Source:HGNC                    |              |             |             |                |
| Symbol;Acc:HGNC:19071]                                               |              |             |             |                |
| -                                                                    |              | 1994        | 3316        | 2916 2105 2474 |
| 2206                                                                 | 69.2811581   | 92.88460784 | 85.81935525 |                |
| 64.66191891                                                          | 68.49416332  | 65.42546469 |             |                |
| ENSG00000197361                                                      | 12.72657843  | 13.90426711 | 12.71137941 |                |
| 35.16023777                                                          | 46.60685375  | 33.36132766 | 13.11407499 |                |
| 38.37613973                                                          | -1.548914764 | 0.023208278 | 0.112167227 | FBXL22         |
| 15                                                                   | 63597353     | 63602428    | +           | 3614           |
| protein_coding F-box and leucine rich repeat protein 22 [Source:HGNC |              |             |             |                |
| Symbol;Acc:HGNC:27537]                                               |              |             |             |                |
| -                                                                    |              | 11          | 15          | 13 35 51       |
| 34                                                                   | 0.166455922  | 0.182994092 | 0.166631713 |                |
| 0.468253587                                                          | 0.614951161  | 0.439174186 |             |                |
| ENSG00000177337                                                      | 53.22023708  | 52.83621503 | 52.80111447 |                |
| 78.35710132                                                          | 106.9216057  | 117.7458623 | 52.95252219 |                |
| 101.0081898                                                          | -0.932147624 | 0.023225159 | 0.112213338 |                |
| DLGAP1-AS1                                                           | 18           | 3593732     | 3598352 +   | 2105 antisense |
| DLGAP1 antisense RNA 1 [Source:HGNC Symbol;Acc:HGNC:31676]           |              |             |             |                |
| -                                                                    | 46           | 57          | 54          | 78 117 120     |
| 1.195089537                                                          | 1.193869105  | 1.188349302 | 1.791610995 |                |
| 2.422101615                                                          | 2.661185704  |             |             |                |
| ENSG00000105821                                                      | 1213.652798  | 998.3263787 | 1134.246163 |                |
| 919.1890732                                                          | 890.0995206  | 776.1414759 | 1115.408446 |                |
| 861.8100232                                                          | 0.37163793   | 0.023235165 | 0.112225853 | DNAJC2         |
| 7                                                                    | 103312474    | 103344873   | -           | 6564           |
| protein_coding DnaJ heat shock protein family (Hsp40) member C2      |              |             |             |                |
| [Source:HGNC Symbol;Acc:HGNC:13192]                                  |              |             |             |                |
| MYB                                                                  |              |             | 1049        | 1077 1160      |
| 915                                                                  | 974          | 791         | 8.739802699 | 7.234043049    |
| 8.186379482                                                          | 6.739904426  | 6.466197752 | 5.62540697  |                |
| ENSG00000111912                                                      | 465.0985936  | 527.4351991 | 383.2969791 |                |
| 505.3028457                                                          | 798.7135329  | 647.6022428 | 458.6102573 |                |
| 650.5395405                                                          | -0.504648677 | 0.023242431 | 0.112225853 | NCOA7          |

|                           |                                                        |                      |                |                |              |          |
|---------------------------|--------------------------------------------------------|----------------------|----------------|----------------|--------------|----------|
| 6                         | 125781161                                              | 125932030            | +              | 7820           |              |          |
| protein_coding            | nuclear receptor coactivator 7                         |                      |                |                | [Source:HGNC |          |
| Symbol;Acc:HGNC:21081]    | -                                                      | 402 569              | 392            | 503            |              | 874      |
| 660                       | 2.811344149                                            | 3.208037759          |                | 2.322104552    |              |          |
| 3.110014748               | 4.870384822                                            | 3.939882032          |                |                |              |          |
| ENSG00000012983           | 1498.26537                                             | 1265.288307          |                | 1101.978815    |              |          |
| 1047.775086               | 1020.781483                                            | 892.9061227          |                | 1288.510831    |              |          |
| 987.1542305               | 0.383791305                                            | 0.023282144          |                | 0.112382109    |              | MAP4K5   |
| 14                        | 50418501                                               | 50561126             | -              | 7620           |              |          |
| protein_coding            | mitogen-activated protein kinase                       | kinase kinase kinase |                |                |              |          |
| 5 [Source:HGNC            | Symbol;Acc:HGNC:6867]                                  | -                    | 1295           | 1365           |              | 1127     |
| 1043                      | 1117 910                                               | 9.294146415          |                | 7.897900135    |              |          |
| 6.851275011               | 6.618057766                                            | 6.387880742          |                | 5.574840633    |              |          |
| ENSG00000051108           | 1684.5362                                              | 1852.975331          |                | 1669.101896    |              |          |
| 1977.009941               | 2385.17428                                             | 2139.049832          |                | 1735.537809    |              |          |
| 2167.078018               | -0.320338467                                           | 0.023309021          |                | 0.112476325    |              |          |
| HERPUD1 16                | 56932048                                               | 56944863             | +              | 5155           |              |          |
| protein_coding            | homocysteine inducible ER protein with ubiquitin like  | domain 1             |                |                |              |          |
| [Source:HGNC              | Symbol;Acc:HGNC:13744]                                 | -                    | 1456           | 1999           |              |          |
| 1707                      | 1968 2610                                              | 2180 15.44640501     |                | 17.09692799    |              |          |
| 15.33936238               | 18.45855249                                            | 22.06329823          |                | 19.74121416    |              |          |
| ENSG00000176076           | 3.470885027                                            | 9.269511408          |                | 16.62257307    |              |          |
| 38.17397244               | 38.38211485                                            | 27.47403455          |                | 9.787656503    |              |          |
| 34.67670728               | -1.814318504                                           | 0.023341636          |                | 0.112598168    |              | KCNE5    |
| X                         | 109623700                                              | 109625172            | -              | 1473           |              |          |
| protein_coding            | potassium voltage-gated channel subfamily E regulatory | subunit 5            |                |                |              |          |
| [Source:HGNC              | Symbol;Acc:HGNC:6241]                                  | -                    | 3              | 10             |              |          |
| 17                        | 38 42                                                  | 28 0.111381541       |                | 0.299316881    |              |          |
| 0.534624221               | 1.247332006                                            | 1.242525016          |                | 0.887363009    |              |          |
| ENSG00000226479           | 809.873173                                             | 769.3694469          |                | 851.6624205    |              |          |
| 1068.871228               | 1071.043776                                            | 968.4597177          |                | 810.3016801    |              |          |
| 1036.124907               | -0.354791131                                           | 0.023363795          |                | 0.112669508    |              |          |
| TMEM185B                  | 2                                                      | 120221278            | 120223408      | -              |              | 2131     |
| protein_coding            | transmembrane protein 185B                             |                      |                |                |              |          |
| [Source:HGNC              | Symbol;Acc:HGNC:18896]                                 | -                    | 700 830        | 871 1064       |              | 1172     |
| 987                       | 17.9642588                                             | 17.17230528          |                | 18.93377279    |              |          |
| 24.14123006               | 23.96639759                                            | 21.62119725          |                |                |              |          |
| ENSG00000183690           | 19.66834849                                            | 8.342560268          |                | 4.888992081    |              | 0        |
| 1.827719755               | 0                                                      | 10.96663361          |                | 0.609239918    |              |          |
| 4.126905295               | 0.023371813                                            | 1                    | EFHC2          | X              |              | 44147882 |
| 44343672                  | -                                                      | 3319                 | protein_coding | EF-hand domain |              |          |
| containing 2 [Source:HGNC | Symbol;Acc:HGNC:26233]                                 | -                    |                |                |              | 17       |
| 9                         | 5 0                                                    | 2 0                  |                | 0.28011501     |              |          |
| 0.119555405               | 0.069785502                                            | 0                    | 0.026259191    | 0              |              |          |
| ENSG00000128342           | 59.00504546                                            | 104.7454789          |                | 162.3145371    |              |          |
| 37.16939421               | 60.31475191                                            | 57.89171565          |                | 108.6883538    |              |          |
| 51.79195392               | 1.070654978                                            | 0.023385617          |                | 0.112739176    |              | LIF      |
| 22                        | 30240447                                               | 30246851             | -              | 3969           |              |          |
| protein_coding            | "LIF, interleukin 6 family cytokine                    |                      |                |                |              |          |
| [Source:HGNC              | Symbol;Acc:HGNC:6596]"                                 | -                    | 51 113         | 166 37         |              | 66       |

|                 |                                                                                             |             |             |             |             |
|-----------------|---------------------------------------------------------------------------------------------|-------------|-------------|-------------|-------------|
| 59              | 0.702722388                                                                                 | 1.2552531   | 1.937445278 |             |             |
| 0.45073558      | 0.72463855                                                                                  | 0.693932054 |             |             |             |
| ENSG00000167081 | 285.7695339                                                                                 | 320.7250947 | 373.518995  |             |             |
| 193.8835969     | 252.2253262                                                                                 | 219.7922764 | 326.6712079 |             |             |
| 221.9670665     | 0.557628506                                                                                 | 0.023437391 | 0.112933157 | PBX3        |             |
| 9               | 125747345                                                                                   | 125967377   | +           | 4529        |             |
| protein_coding  | PBX homeobox 3 [Source:HGNC Symbol;Acc:HGNC:8634]                                           |             |             |             |             |
| Homeobox        | 247                                                                                         | 346         | 382         | 193         | 276 224     |
| 2.982561073     | 3.368276506                                                                                 | 3.907180709 | 2.060422125 |             |             |
| 2.655616505     | 2.308828813                                                                                 |             |             |             |             |
| ENSG00000265511 | 9.255693406                                                                                 | 17.61207168 | 5.866790497 |             |             |
| 22.10072088     | 25.58807657                                                                                 | 67.70387084 | 10.91151853 |             |             |
| 38.46422277     | -1.812090921                                                                                | 0.02344063  | 0.112933157 |             |             |
| AC020558.2      | 17                                                                                          | 17507351    | 17508308    | +           | 795         |
| antisense       | novel transcript                                                                            |             | -           | 8           | 19          |
| 6               | 22                                                                                          | 28          | 69          | 0.550322882 | 1.053708371 |
| 0.349612199     | 1.338002019                                                                                 | 1.534791907 | 4.051613392 |             |             |
| ENSG00000150779 | 474.354287                                                                                  | 754.5382286 | 865.3515983 |             |             |
| 820.7404074     | 1062.819037                                                                                 | 1088.168011 | 698.0813713 |             |             |
| 990.5758186     | -0.503818047                                                                                | 0.023448267 | 0.112934362 | TIMM8B      |             |
| 11              | 112084800                                                                                   | 112086798   | -           | 1166        |             |
| protein_coding  | translocase of inner mitochondrial membrane 8 homolog B [Source:HGNC Symbol;Acc:HGNC:11818] |             |             |             |             |
| 817             | 1163 1109                                                                                   | 19.23003254 | 30.7793761  | 410 814     | 885         |
| 35.15986315     | 33.87854285                                                                                 | 43.46500782 | 44.39959734 |             |             |
| ENSG00000175387 | 2371.771435                                                                                 | 2003.141415 | 1903.773516 |             |             |
| 1703.764665     | 1696.123932                                                                                 | 1607.231021 | 2092.895456 |             |             |
| 1669.039873     | 0.326068558                                                                                 | 0.023484782 | 0.113074604 | SMAD2       |             |
| 18              | 47808957                                                                                    | 47931146    | -           | 36366       |             |
| protein_coding  | SMAD family member 2 [Source:HGNC Symbol;Acc:HGNC:6768]                                     |             |             |             |             |
| MH1             | 2050                                                                                        | 2161        | 1947        | 1696        | 1856        |
| 1638            | 3.082854581                                                                                 | 2.61995113  | 2.480121019 |             |             |
| 2.254922032     | 2.224032018                                                                                 | 2.102637467 |             |             |             |
| ENSG00000140848 | 920.9414939                                                                                 | 1129.953441 | 1154.779929 |             |             |
| 729.3237892     | 762.1591378                                                                                 | 938.0420366 | 1068.558288 |             |             |
| 809.8416545     | 0.400550849                                                                                 | 0.023495034 | 0.113088344 | CPNE2       |             |
| 16              | 57092537                                                                                    | 57148367    | +           | 7781        |             |
| protein_coding  | copine 2 [Source:HGNC Symbol;Acc:HGNC:2315]                                                 |             |             |             |             |
| 796             | 1219 1181                                                                                   | 726 834     | 956         | 5.594642822 | -           |
| 6.907203451     | 7.030997412                                                                                 | 4.51130741  | 4.670778076 |             |             |
| 5.735463401     |                                                                                             |             |             |             |             |
| ENSG00000092208 | 274.1999171                                                                                 | 352.2414335 | 323.6512757 |             |             |
| 195.8927533     | 186.427415                                                                                  | 256.0972506 | 316.6975421 |             |             |
| 212.8058063     | 0.574863137                                                                                 | 0.023571981 | 0.113412384 | GEMIN2      |             |
| 14              | 39114223                                                                                    | 39136973    | +           | 2757        |             |
| protein_coding  | gem nuclear organelle associated protein 2 [Source:HGNC Symbol;Acc:HGNC:10884]              |             |             |             |             |
| 195             | 204 261                                                                                     | 4.701173643 | 6.076881792 | 237 380     | 331         |
| 5.561522307     | 3.419787037                                                                                 | 3.224422916 | 4.419262277 |             |             |
| ENSG00000132507 | 9004.632722                                                                                 | 12581.50783 | 12640.00013 |             |             |

|                                                                       |              |             |                   |                  |
|-----------------------------------------------------------------------|--------------|-------------|-------------------|------------------|
| 8792.068599                                                           | 9139.512634  | 9299.960694 | 11408.71356       |                  |
| 9077.180642                                                           | 0.329934035  | 0.023577194 | 0.113412384       | EIF5A            |
| 17                                                                    | 7306999      | 7312463 +   | 2815              | protein_coding   |
| eukaryotic translation initiation factor 5A [Source:HGNC              |              |             |                   |                  |
| Symbol;Acc:HGNC:3300]                                                 | -            | 7783        | 13573             | 12927 8752 10001 |
| 9478                                                                  | 151.2040222  | 212.5844079 | 212.7266032       |                  |
| 150.324624                                                            | 154.8187747  | 157.1753156 |                   |                  |
| ENSG00000135336                                                       | 1025.068045  | 674.8204305 | 729.4376185       |                  |
| 632.8842799                                                           | 593.0950604  | 542.6121823 | 809.7753646       |                  |
| 589.5305075                                                           | 0.456850089  | 0.023593943 | 0.113457255       | ORC3             |
| 6                                                                     | 87590067     | 87667453    | + 3689            |                  |
| protein_coding origin recognition complex subunit 3 [Source:HGNC      |              |             |                   |                  |
| Symbol;Acc:HGNC:8489]                                                 | -            | 886         | 728               | 746 630 649      |
| 553                                                                   | 13.13468855  | 8.700749837 | 9.367692537       |                  |
| 8.257205834                                                           | 7.666455856  | 6.997815886 |                   |                  |
| ENSG00000260368                                                       | 12.72657843  | 1.853902282 | 5.866790497       | 0                |
| 0                                                                     | 0            | 6.815757071 | 0                 | 5.257183072      |
| 0.023598111                                                           | 1            | AC027373.1  | 8                 | 100913247        |
| 100914388                                                             | -            | 1142        | sense_overlapping | "novel           |
| transcript, overlapping YWHAZ" - 11 2 6 0                             |              |             |                   |                  |
| 0                                                                     | 0            | 0.526770316 | 0.07721432        | 0.243381522      |
| 0                                                                     | 0            | 0           |                   |                  |
| ENSG00000103226                                                       | 201.3113316  | 43.56670362 | 32.26734773       |                  |
| 14.06409511                                                           | 22.84649694  | 55.92928461 | 92.38179431       |                  |
| 30.94662555                                                           | 1.574373978  | 0.023605279 | 0.113476069       | NOM03            |
| 16                                                                    | 16232495     | 16294814    | + 8274            |                  |
| protein_coding NODAL modulator 3 [Source:HGNC Symbol;Acc:HGNC:25242]  |              |             |                   |                  |
| -                                                                     | 174          | 47          | 33                | 14 25 57         |
| 1.150081042                                                           | 0.250447268  | 0.18475699  | 0.081811383       |                  |
| 0.131668864                                                           | 0.321592102  |             |                   |                  |
| ENSG00000168303                                                       | 945.2376891  | 1415.454392 | 1378.695767       |                  |
| 1630.430454                                                           | 1453.037205  | 1920.238772 | 1246.462616       |                  |
| 1667.902144                                                           | -0.419323139 | 0.023647123 | 0.113641488       | MPLKIP           |
| 7                                                                     | 40126023     | 40134652    | - 7661            |                  |
| protein_coding M-phase specific PLK1 interacting protein [Source:HGNC |              |             |                   |                  |
| Symbol;Acc:HGNC:16002]                                                | -            | 817         | 1527              | 1410 1623 1590   |
| 1957                                                                  | 5.832185206  | 8.787949097 | 8.525818953       |                  |
| 10.24316749                                                           | 9.044202127  | 11.92480811 |                   |                  |
| ENSG00000196968                                                       | 658.3111935  | 482.9415444 | 644.3691563       |                  |
| 483.2021248                                                           | 269.5886638  | 459.2088631 | 595.207298        |                  |
| 403.9998839                                                           | 0.559234002  | 0.023659808 | 0.113666714       | FUT11            |
| 10                                                                    | 73772291     | 73780251    | + 4910            |                  |
| protein_coding fucosyltransferase 11 [Source:HGNC                     |              |             |                   |                  |
| Symbol;Acc:HGNC:19233]                                                | -            | 569         | 521               | 659 481 295      |
| 468                                                                   | 6.33760966   | 4.678322851 | 6.217365204       |                  |
| 4.73657917                                                            | 2.618177713  | 4.449491657 |                   |                  |
| ENSG00000109738                                                       | 432.7036667  | 377.2691143 | 336.3626552       |                  |
| 251.1445555                                                           | 296.0906003  | 255.1160351 | 382.1118121       |                  |
| 267.450397                                                            | 0.513477494  | 0.023684157 | 0.113747944       | GLRB             |
| 4                                                                     | 157076057    | 157172090   | + 3459            |                  |

|                                                  |                                                 |                                            |             |             |                |            |
|--------------------------------------------------|-------------------------------------------------|--------------------------------------------|-------------|-------------|----------------|------------|
| protein_coding                                   | glycine receptor beta [Source:HGNC              |                                            |             |             |                |            |
| Symbol;Acc:HGNC:4329]                            | -                                               | 374                                        | 407         | 344         | 250            | 324        |
| 260                                              | 5.913107206                                     | 5.187735261                                | 4.606916453 |             |                |            |
| 3.494545208                                      | 4.081812449                                     | 3.50888247                                 |             |             |                |            |
| ENSG00000128510                                  | 341.3036943                                     | 223.3952249                                | 471.2988366 |             |                |            |
| 254.1582902                                      | 138.9067014                                     | 235.4917247                                | 345.3325853 |             |                |            |
| 209.5189054                                      | 0.721457424                                     | 0.023697049                                | 0.113774116 |             |                | CPA4       |
| 7                                                | 130293134                                       | 130324180                                  | +           | 3958        |                |            |
| protein_coding                                   | carboxypeptidase A4 [Source:HGNC                |                                            |             |             |                |            |
| Symbol;Acc:HGNC:15740]                           | -                                               | 295                                        | 241         | 482         | 253            | 152        |
| 240                                              | 4.076063478                                     | 2.684572955                                | 5.641228667 |             |                |            |
| 3.090622399                                      | 1.673502617                                     | 2.830619458                                |             |             |                |            |
| ENSG00000187522                                  | 861.9364484                                     | 543.1933685                                | 694.2368755 |             |                |            |
| 485.2112812                                      | 569.3347036                                     | 443.5094148                                | 699.7888975 |             |                |            |
| 499.3517999                                      | 0.485470938                                     | 0.023767587                                | 0.114076957 |             |                | HSPA14     |
| 10                                               | 14838164                                        | 14871741                                   | +           | 2644        |                |            |
| protein_coding                                   | heat shock protein family A (Hsp70) member 14   |                                            |             |             |                |            |
| [Source:HGNC Symbol;Acc:HGNC:29526]              | -                                               |                                            | 745         | 586         |                | 710        |
| 483                                              | 623                                             | 452                                        | 15.40953504 | 9.771699953 |                |            |
| 12.43939772                                      | 8.832566104                                     | 10.26798424                                | 7.980369862 |             |                |            |
| ENSG00000156475                                  | 0                                               | 4.634755704                                | 19.55596832 | 0           | 0              |            |
| 0                                                | 8.063574676                                     | 0                                          | 5.507107156 | 0.023785836 |                |            |
| 1                                                | PPP2R2B 5                                       | 146581146                                  | 147084784   |             |                | -          |
| 13206                                            | protein_coding protein phosphatase 2 regulatory |                                            |             |             |                |            |
| subunit Bbeta [Source:HGNC Symbol;Acc:HGNC:9305] | -                                               |                                            |             |             |                | 0          |
| 5                                                | 20                                              | 0                                          | 0           | 0           | 0.016692934    |            |
| 0.070155409                                      | 0                                               | 0                                          | 0           |             |                |            |
| ENSG00000162366                                  | 0                                               | 13.90426711                                | 9.777984162 | 0           | 0              |            |
| 0                                                | 7.894083758                                     | 0                                          | 5.477669748 | 0.023803773 |                |            |
| 1                                                | PDZK1IP1                                        | 1                                          | 47183593    | 47191044    |                |            |
| -                                                | 1438                                            | protein_coding PDZK1 interacting protein 1 |             |             |                |            |
| [Source:HGNC Symbol;Acc:HGNC:16887]              | -                                               |                                            | 0           | 15          | 10             |            |
| 0                                                | 0                                               | 0                                          | 0           | 0.459903094 | 0.322139195    |            |
| 0                                                | 0                                               | 0                                          |             |             |                |            |
| ENSG00000101181                                  | 1081.759167                                     | 1649.973031                                | 1705.280438 |             |                |            |
| 2089.522702                                      | 1869.757309                                     | 1922.201203                                | 1479.004212 |             |                |            |
| 1960.493738                                      | -0.405791303                                    | 0.023826185                                | 0.114319674 |             |                | MTG2       |
| 20                                               | 62183029                                        | 62203568                                   | +           | 5209        |                |            |
| protein_coding                                   | mitochondrial ribosome associated GTPase 2      |                                            |             |             |                |            |
| [Source:HGNC Symbol;Acc:HGNC:16239]              | -                                               |                                            | 935         | 1780        |                | 1744       |
| 2080                                             | 2046                                            | 1959                                       | 9.816393658 | 15.06605688 |                |            |
| 15.50938507                                      | 19.30679539                                     | 17.11629921                                | 17.55602192 |             |                |            |
| ENSG00000196544                                  | 74.04554725                                     | 118.649746                                 | 93.86864795 |             |                |            |
| 224.0209435                                      | 113.3186248                                     | 173.6751469                                | 95.52131374 |             |                |            |
| 170.3382384                                      | -0.830986228                                    | 0.023833113                                | 0.114319674 |             |                | BORCS6     |
| 17                                               | 8188333                                         | 8190907                                    | -           | 2575        | protein_coding | BLOC-1     |
| related complex                                  | subunit 6 [Source:HGNC Symbol;Acc:HGNC:25939]   |                                            |             |             |                | -          |
| 64                                               | 128                                             | 96                                         | 223         | 124         | 177            | 1.35924409 |
| 2.191627263                                      | 1.727016375                                     | 4.187249565                                | 2.098471375 |             |                |            |
| 3.208795714                                      |                                                 |                                            |             |             |                |            |

|                                     |                                                    |             |             |        |
|-------------------------------------|----------------------------------------------------|-------------|-------------|--------|
| ENSG00000134996                     | 448.9011302                                        | 468.1103261 | 431.2091015 |        |
| 294.3414191                         | 354.5776324                                        | 327.7259835 | 449.4068526 |        |
| 325.548345                          | 0.464837847                                        | 0.023842666 | 0.114329622 | OSTF1  |
| 9                                   | 75088543                                           | 75147265    | + 1319      |        |
| protein_coding                      | osteoclast stimulating factor 1 [Source:HGNC       |             |             |        |
| Symbol;Acc:HGNC:8510]               | -                                                  | 388 505     | 441 293     | 388    |
| 334                                 | 16.08724377                                        | 16.88031476 | 15.48803244 |        |
| 10.74048867                         | 12.81874557                                        | 11.8208228  |             |        |
| ENSG00000101104                     | 511.3770607                                        | 566.3671471 | 696.1924723 |        |
| 405.8496017                         | 343.6113139                                        | 508.2696391 | 591.3122267 |        |
| 419.2435182                         | 0.497020457                                        | 0.023861268 | 0.114382942 |        |
| PABPC1L 20                          | 44910062                                           | 44959035    | + 4984      |        |
| protein_coding                      | poly(A) binding protein cytoplasmic 1 like         |             |             |        |
| [Source:HGNC Symbol;Acc:HGNC:15797] | -                                                  | 442 611     |             | 712    |
| 404                                 | 376 518                                            | 4.849968841 | 5.405017875 |        |
| 6.617659473                         | 3.919264267                                        | 3.287520041 | 4.851742709 |        |
| ENSG00000143162                     | 2021.212047                                        | 2076.370555 | 1802.082481 |        |
| 1171.338207                         | 1537.112314                                        | 1796.605616 | 1966.555028 |        |
| 1501.685379                         | 0.388963021                                        | 0.023882292 | 0.114447838 | CREG1  |
| 1                                   | 167529117                                          | 167553805   | - 3286      |        |
| protein_coding                      | cellular repressor of E1A stimulated genes 1       |             |             |        |
| [Source:HGNC Symbol;Acc:HGNC:2351]  | -                                                  | 1747 2240   |             | 1843   |
| 1166                                | 1682 1831                                          | 29.07502244 | 30.05483979 |        |
| 25.98126137                         | 17.15663879                                        | 22.30576026 | 26.01158527 |        |
| ENSG00000272333                     | 1222.908491                                        | 1802.919969 | 2374.094554 |        |
| 2929.350095                         | 2053.443145                                        | 2527.611178 | 1799.974338 |        |
| 2503.468139                         | -0.475376051                                       | 0.023926372 | 0.114623145 | KMT2B  |
| 19                                  | 35718019                                           | 35738878    | + 10279     |        |
| protein_coding                      | lysine methyltransferase 2B [Source:HGNC           |             |             |        |
| Symbol;Acc:HGNC:15840]              | -                                                  | 1057 1945   | 2428 2916   | 2247   |
| 2576                                | 5.623657127                                        | 8.34262452  | 10.94208974 |        |
| 13.71632826                         | 9.526004978                                        | 11.69879224 |             |        |
| ENSG00000100997                     | 860.7794867                                        | 952.9057728 | 1066.778072 |        |
| 804.6671558                         | 711.8968445                                        | 693.7193723 | 960.1544439 |        |
| 736.7611242                         | 0.382647753                                        | 0.023955965 | 0.114728961 | ABHD12 |
| 20                                  | 25294743                                           | 25390983    | - 3429      |        |
| protein_coding                      | abhydrolase domain containing 12 [Source:HGNC      |             |             |        |
| Symbol;Acc:HGNC:15868]              | -                                                  | 744 1028    | 1091 801    | 779    |
| 707                                 | 11.86588577                                        | 13.21781252 | 14.7387184  |        |
| 11.29448018                         | 9.899848996                                        | 9.624938529 |             |        |
| ENSG00000168389                     | 198.9974082                                        | 302.1860719 | 334.4070583 |        |
| 164.7508284                         | 223.89567                                          | 127.5580175 | 278.5301795 |        |
| 172.068172                          | 0.695407014                                        | 0.023970829 | 0.114730374 | MFSD2A |
| 1                                   | 39955112                                           | 39969968    | + 4007      |        |
| protein_coding                      | major facilitator superfamily domain containing 2A |             |             |        |
| [Source:HGNC Symbol;Acc:HGNC:25897] | -                                                  | 172 326     |             | 342    |
| 164                                 | 245 130                                            | 2.347490358 | 3.587006929 |        |
| 3.953750132                         | 1.978908537                                        | 2.664436287 | 1.514502678 |        |
| ENSG00000165775                     | 2141.536062                                        | 1801.993018 | 1541.010304 |        |
| 2264.319312                         | 2519.511682                                        | 2214.603427 | 1828.179794 |        |



|                                     |                                                      |                                 |                          |             |
|-------------------------------------|------------------------------------------------------|---------------------------------|--------------------------|-------------|
| 2332.811474                         | -0.352202094                                         | 0.023971271                     | 0.114730374              | FUNDC2      |
| X                                   | 155025980                                            | 155060303                       | + 10252                  |             |
| protein_coding                      | FUN14 domain containing 2 [Source:HGNC               |                                 |                          |             |
| Symbol;Acc:HGNC:24925]              | -                                                    | 1851 1944                       | 1576 2254                | 2757        |
| 2257                                | 9.873986611                                          | 8.360295364                     | 7.121148977              |             |
| 10.63032471                         | 11.71889779                                          | 10.27706249                     |                          |             |
| ENSG00000184110                     | 178.1720981                                          | 267.8888797                     | 363.7410108              |             |
| 1536.000101                         | 267.7609441                                          | 669.1889843                     | 269.9339962              |             |
| 824.3166766                         | -1.61019618                                          | 0.024055093                     | 0.11507444               | EIF3C       |
| 16                                  | 28688558                                             | 28735730                        | + 6982                   |             |
| protein_coding                      | eukaryotic translation initiation factor 3 subunit C |                                 |                          |             |
| [Source:HGNC Symbol;Acc:HGNC:3279]  | -                                                    | 154 289                         | 372                      |             |
| 1529                                | 293 682                                              | 1.206245175                     | 1.824954144              |             |
| 2.468115908                         | 10.58836387                                          | 1.828716459                     | 4.559850101              |             |
| ENSG00000275023                     | 2894.718113                                          | 3793.084068                     | 4337.513774              |             |
| 4488.455496                         | 4407.546189                                          | 5278.939495                     | 3675.105318              |             |
| 4724.980393                         | -0.362225935                                         | 0.024058214                     | 0.11507444               | MLLT6       |
| 17                                  | 38705542                                             | 38729803                        | + 13315                  |             |
| protein_coding                      | "MLLT6, PHD finger containing [Source:HGNC           |                                 |                          |             |
| Symbol;Acc:HGNC:7138]"              | -                                                    | 2502 4092                       | 4436 4468                | 4823        |
| 5380                                | 10.27639638                                          | 13.54966046                     | 15.43308764              |             |
| 16.22457055                         | 15.78464027                                          | 18.86197395                     |                          |             |
| ENSG00000267277                     | 1.156961676                                          | 2.780853423                     | 6.844588913              |             |
| 8.036625776                         | 26.50193645                                          | 27.47403455                     | 3.59413467               |             |
| 20.67086559                         | -2.510983469                                         | 0.024097808                     | 0.115218319              |             |
| AC024575.1                          | 19                                                   | 11368123                        | 11374935                 | - 682       |
| antisense                           | "novel transcript, antisense to SWSAP1"              |                                 |                          | -           |
| 1                                   | 3                                                    | 7                               | 8 29                     | 28          |
| 0.193941539                         | 0.475462338                                          | 0.567161613                     | 1.852986354              |             |
| 1.916547964                         |                                                      |                                 |                          |             |
| ENSG00000268201                     | 20.82531016                                          | 3.707804563                     | 0                        | 0           |
| 0                                   | 8.177704909                                          | 0                               | 5.519269021              | 0.0241015   |
| 1                                   | AC020915.2                                           | 19                              | 58266635                 | 58267685    |
| +                                   | 550                                                  | sense_intronic                  | "novel transcript, sense |             |
| intronic to ZNF544"                 | -                                                    | 18                              | 4                        | 0 0 0       |
| 0                                   | 1.789800101                                          | 0.320650011                     | 0                        | 0 0         |
| 0                                   |                                                      |                                 |                          |             |
| ENSG00000065308                     | 2485.153679                                          | 2646.445507                     | 3338.203793              |             |
| 2352.722196                         | 1758.266404                                          | 2402.996807                     | 2823.26766               |             |
| 2171.328469                         | 0.379100945                                          | 0.024103368                     | 0.115218319              | TRAM2       |
| 6                                   | 52497402                                             | 52576915                        | - 6908                   |             |
| protein_coding                      | translocation associated membrane protein 2          |                                 |                          |             |
| [Source:HGNC Symbol;Acc:HGNC:16855] | -                                                    | 2148 2855                       | 3414                     |             |
| 2342                                | 1924 2449                                            | 17.00500096                     | 18.22165173              |             |
| 22.89357645                         | 16.39214467                                          | 12.13699957                     | 16.54940911              |             |
| ENSG00000196361                     | 0                                                    | 14.83121825                     | 8.800185745              | 0           |
| 0                                   | 7.877134666                                          | 0                               | 5.474673725              | 0.024114393 |
| 1                                   | ELAVL3                                               | 19                              | 11451326                 | 11481046    |
| 4761                                | protein_coding                                       | ELAV like RNA binding protein 3 |                          |             |
| [Source:HGNC Symbol;Acc:HGNC:3314]  | -                                                    | 0                               | 16                       | 9           |

|                 |                     |                                               |                        |                        |                              |                |        |
|-----------------|---------------------|-----------------------------------------------|------------------------|------------------------|------------------------------|----------------|--------|
|                 | 0                   | 0                                             | 0                      | 0                      | 0.148168457                  | 0.087568273    |        |
|                 | 0                   | 0                                             | 0                      |                        |                              |                |        |
| ENSG00000226276 | 30.08100357         |                                               | 0                      | 0                      | 0                            | 0              | 0      |
|                 | 10.02700119         | 0                                             |                        | 5.813578856            | 0.024127685                  |                | 1      |
|                 | AC093382.1          | 2                                             |                        | 215939308              | 215941719                    |                | -      |
|                 | 379                 | lincRNA novel transcript                      |                        |                        | -                            | 26             | 0      |
|                 | 0                   | 0                                             | 0                      | 0                      | 3.751706457                  | 0              | 0      |
|                 | 0                   | 0                                             | 0                      |                        |                              |                |        |
| ENSG00000224945 | 15.04050178         |                                               | 20.3929251             |                        | 33.24514615                  |                |        |
|                 | 50.2289111          | 68.53949081                                   |                        | 52.00442253            | 22.89285768                  |                |        |
|                 | 56.92427481         | -1.31029817                                   |                        | 0.024158752            | 0.115446966                  |                |        |
| AL353150.1      | 9                   | 89088604                                      |                        | 89109934               | -                            |                | 1038   |
|                 | sense_intronic      | novel transcript                              |                        |                        | -                            | 13             | 22     |
|                 | 34                  | 50                                            | 75                     | 53                     | 0.684921362                  | 0.934456922    |        |
|                 | 1.517343887         | 2.329023482                                   |                        | 3.148636369            | 2.383551566                  |                |        |
| ENSG00000271447 | 5.784808379         |                                               | 32.44328993            |                        | 40.08973506                  |                | 0      |
|                 | 10.05245865         | 0                                             |                        | 26.10594446            | 3.350819551                  |                |        |
|                 | 2.947750418         | 0.02417772                                    |                        | 0.115501501            | MMP28                        | 17             |        |
|                 | 35756249            | 35795707                                      |                        | -                      | 2858                         | protein_coding | matrix |
|                 | metallopeptidase 28 | [Source:HGNC                                  | Symbol;Acc:HGNC:14366] |                        | -                            |                | 5      |
|                 | 35                  | 41                                            | 0                      | 11                     | 0                            | 0.095675886    |        |
|                 | 0.539932883         | 0.664544531                                   |                        | 0                      | 0.167721624                  | 0              |        |
| ENSG00000107551 | 372.5416596         |                                               | 154.8008405            |                        | 171.1147228                  |                |        |
|                 | 73.33421021         | 144.3898606                                   |                        | 157.9756986            | 232.8190743                  |                |        |
|                 | 125.2332565         | 0.891604973                                   |                        | 0.024191239            | 0.115529982                  |                | RASSF4 |
|                 | 10                  | 44959407                                      |                        | 44995891               | +                            | 9481           |        |
|                 | protein_coding      | Ras association domain family member 4        | [Source:HGNC           | Symbol;Acc:HGNC:20793] | -                            | 322            | 167    |
|                 | 161                 | 1.857361495                                   |                        | 0.776598026            | 0.855039854                  |                | 158    |
|                 | 0.372280193         | 0.726208852                                   |                        | 0.792716258            |                              |                |        |
| ENSG00000160113 | 956.8073058         |                                               | 1470.144509            |                        | 1999.597761                  |                |        |
|                 | 876.9967878         | 919.3430367                                   |                        | 1274.59896             | 1475.516525                  |                |        |
|                 | 1023.646261         | 0.528062062                                   |                        | 0.02421844             | 0.115623765                  |                | NR2F6  |
|                 | 19                  | 17231883                                      |                        | 17245940               | -                            | 2676           |        |
|                 | protein_coding      | nuclear receptor subfamily 2 group F member 6 |                        |                        |                              |                |        |
|                 | [Source:HGNC        | Symbol;Acc:HGNC:7977]                         |                        | RXR-like               |                              | 827            | 1586   |
|                 | 2045                | 873                                           | 1006                   | 1299                   | 16.9010666                   | 26.13069927    |        |
|                 | 35.40052143         | 15.77354652                                   |                        | 16.38213383            | 22.66047858                  |                |        |
| ENSG00000273176 | 21.98227184         |                                               | 2.780853423            |                        | 0                            | 0              | 0      |
|                 | 0                   | 8.254375087                                   |                        | 0                      | 5.532366388                  | 0.024277802    |        |
|                 | 1                   | AL008635.1                                    |                        | 22                     | 35298838                     | 35299541       |        |
|                 | -                   | 385                                           | antisense              |                        | "novel transcript, antisense |                |        |
|                 | to TOM1"            | -                                             | 19                     | 3                      | 0                            | 0              | 0      |
|                 | 2.698904915         | 0.343553584                                   |                        | 0                      | 0                            | 0              | 0      |
| ENSG00000168476 | 634.0149983         |                                               | 969.5908933            |                        | 1357.184202                  |                |        |
|                 | 621.8339194         | 657.9791117                                   |                        | 764.3668897            | 986.9300311                  |                |        |
|                 | 681.3933069         | 0.535222342                                   |                        | 0.024279482            | 0.115879001                  |                | REEP4  |
|                 | 8                   | 22138020                                      |                        | 22141951               | -                            | 2266           |        |
|                 | protein_coding      | receptor accessory protein 4                  | [Source:HGNC           | Symbol;Acc:HGNC:26176] | -                            | 548            | 1046   |
|                 |                     |                                               |                        |                        | 1388                         | 619            | 720    |

|                                                    |                                                    |             |             |                         |
|----------------------------------------------------|----------------------------------------------------|-------------|-------------|-------------------------|
| 779                                                | 13.22559945                                        | 20.35193641 | 28.37474821 |                         |
| 13.20784489                                        | 13.84621875                                        | 16.04809875 |             |                         |
| ENSG00000264522                                    | 939.4528807                                        | 836.109929  | 1022.777143 |                         |
| 1185.402302                                        | 1077.440795                                        | 1365.852003 | 932.7799843 |                         |
| 1209.565034                                        | -0.374909992                                       | 0.024300275 | 0.115942043 | OTUD7B                  |
| 1                                                  | 149937812                                          | 150010676   | -           | 12177                   |
| protein_coding                                     | OTU deubiquitinase 7B [Source:HGNC                 |             |             |                         |
| Symbol;Acc:HGNC:16683]                             | -                                                  | 812         | 902         | 1046 1180 1179          |
| 1392                                               | 3.646787319                                        | 3.265879747 | 3.979182283 |                         |
| 4.685359484                                        | 4.219219278                                        | 5.336358095 |             |                         |
| ENSG00000135930                                    | 1276.128728                                        | 1319.978425 | 1293.627305 |                         |
| 1561.114557                                        | 1529.801435                                        | 1767.169151 | 1296.578152 |                         |
| 1619.361714                                        | -0.320562704                                       | 0.024316565 | 0.115953283 | EIF4E2                  |
| 2                                                  | 232550052                                          | 232583644   | +           | 7177                    |
| protein_coding                                     | eukaryotic translation initiation factor 4E family |             |             |                         |
| member 2 [Source:HGNC                              | Symbol;Acc:HGNC:3293]                              |             |             |                         |
|                                                    | -                                                  |             | 1103        | 1424                    |
| 1323                                               | 1554                                               | 1674        | 1801        | 8.404797977 8.747843423 |
| 8.539242634                                        | 10.46909847                                        | 10.16415093 | 11.71431242 |                         |
| ENSG00000220205                                    | 458.1568236                                        | 629.3998246 | 510.4107732 |                         |
| 622.8384977                                        | 672.6008698                                        | 943.9293297 | 532.6558072 |                         |
| 746.4562324                                        | -0.485887722                                       | 0.024317801 | 0.115953283 | VAMP2                   |
| 17                                                 | 8159149                                            | 8163546     | -           | 3268 protein_coding     |
| vesicle associated membrane protein 2 [Source:HGNC | Symbol;Acc:HGNC:12643]                             |             |             |                         |
|                                                    | -                                                  | 396         | 679         | 522 620 736             |
| 962                                                | 6.626860841                                        | 9.160552845 | 7.399304686 |                         |
| 9.172988692                                        | 9.814187801                                        | 13.74165561 |             |                         |
| ENSG00000124209                                    | 3590.05208                                         | 3051.523156 | 2971.529387 |                         |
| 4416.125864                                        | 3946.046951                                        | 3597.136094 | 3204.368207 |                         |
| 3986.436303                                        | -0.315286024                                       | 0.024396545 | 0.116292478 | RAB22A                  |
| 20                                                 | 58309696                                           | 58367507    | +           | 9285                    |
| protein_coding                                     | "RAB22A, member RAS oncogene family [Source:HGNC   |             |             |                         |
| Symbol;Acc:HGNC:9764]"                             | -                                                  | 3103        | 3292        | 3039 4396 4318          |
| 3666                                               | 18.27656521                                        | 15.6319039  | 15.16181691 |                         |
| 22.89164446                                        | 20.26559353                                        | 18.43132633 |             |                         |
| ENSG00000153714                                    | 133.0505927                                        | 146.4582803 | 85.06846221 |                         |
| 204.9339573                                        | 210.1877718                                        | 182.5060866 | 121.5257784 |                         |
| 199.2092719                                        | -0.713458941                                       | 0.024438343 | 0.116452604 |                         |
| LURAP1L 9                                          | 12775021                                           | 12822131    | +           | 2132                    |
| protein_coding                                     | leucine rich adaptor protein 1 like [Source:HGNC   |             |             |                         |
| Symbol;Acc:HGNC:31452]                             | -                                                  | 115         | 158         | 87 204 230              |
| 186                                                | 2.949886815                                        | 3.267411585 | 1.890316426 |                         |
| 4.626410698                                        | 4.701097229                                        | 4.072600214 |             |                         |
| ENSG00000135047                                    | 649.0555001                                        | 958.4674796 | 801.7947013 |                         |
| 912.1570256                                        | 1100.287292                                        | 1248.106141 | 803.1058937 |                         |
| 1086.850153                                        | -0.435596431                                       | 0.024445372 | 0.116452604 | CTSL                    |
| 9                                                  | 87725519                                           | 87731393    | +           | 2366                    |
| protein_coding                                     | cathepsin L [Source:HGNC                           |             |             |                         |
| Symbol;Acc:HGNC:2537]                              | -                                                  |             |             |                         |
| 561                                                | 1034                                               | 820         | 908         | 1204 1272 12.96709921   |
| 19.26813837                                        | 16.05467683                                        | 18.55548561 | 22.17534291 |                         |
| 25.0968033                                         |                                                    |             |             |                         |

|                                                       |                                                               |                                          |                  |                |                    |
|-------------------------------------------------------|---------------------------------------------------------------|------------------------------------------|------------------|----------------|--------------------|
| ENSG00000268218                                       | 83.30124065                                                   | 80.64474925                              | 95.82424478      |                |                    |
| 141.6455293                                           | 121.5433637                                                   | 182.5060866                              | 86.59007823      |                |                    |
| 148.5649932                                           | -0.778188749                                                  | 0.024454439                              | 0.116459505      |                |                    |
| AC137932.3                                            | 16                                                            | 89268104                                 | 89273044         | +              | 3660               |
|                                                       | antisense                                                     | "novel transcript, antisense to ANKRD11" |                  |                |                    |
| -                                                     | 72                                                            | 87                                       | 98               | 141            | 133 186            |
| 1.075836127                                           | 1.048026165                                                   | 1.240359125                              | 1.862684256      |                |                    |
| 1.58354042                                            | 2.372345261                                                   |                                          |                  |                |                    |
| ENSG00000131899                                       | 2095.257595                                                   | 2656.64197                               | 2821.926229      |                |                    |
| 1893.629949                                           | 1952.004698                                                   | 2133.162539                              | 2524.608598      |                |                    |
| 1992.932395                                           | 0.341550047                                                   | 0.0244646                                | 0.11647161       |                | LLGL1              |
| 17                                                    | 18225587                                                      | 18244875                                 | +                | 6638           |                    |
| protein_coding                                        | "LLGL1, scribble cell polarity complex component              |                                          |                  |                |                    |
| [Source:HGNC Symbol;Acc:HGNC:6628]"                   | -                                                             | 1811                                     | 2866             | 2886           |                    |
| 1885                                                  | 2136                                                          | 2174                                     | 14.92024364      | 19.03587726    |                    |
| 20.14009591                                           | 13.7301513                                                    | 14.02240796                              | 15.28862145      |                |                    |
| ENSG00000163449                                       | 65.94681552                                                   | 47.27450818                              | 51.82331606      | 0              |                    |
| 14.62175804                                           | 29.43646558                                                   | 55.01487992                              | 14.68607454      |                |                    |
| 1.903223386                                           | 0.024498932                                                   | 0.116576373                              | TMEM169          | 2              |                    |
| 216081866                                             | 216102783                                                     | +                                        | 3628             | protein_coding |                    |
|                                                       | transmembrane protein 169 [Source:HGNC Symbol;Acc:HGNC:25130] |                                          |                  |                |                    |
| -                                                     | 57                                                            | 51                                       | 53               | 0              | 16 30              |
| 0.85921587                                            | 0.619778998                                                   | 0.676723171                              | 0                | 0.192181378    |                    |
| 0.386011295                                           |                                                               |                                          |                  |                |                    |
| ENSG00000283787                                       | 43.96454368                                                   | 12.97731597                              | 44.00092873      | 0              |                    |
| 1.827719755                                           | 16.68066383                                                   | 33.64759613                              | 6.169461195      |                |                    |
| 2.447815033                                           | 0.024501857                                                   | 0.116576373                              | PRR33            | 11             |                    |
| 1888577                                               | 1891895                                                       | -                                        | 3319             | protein_coding | proline rich       |
| 33 [Source:HGNC Symbol;Acc:HGNC:35118]                | -                                                             | 38                                       | 14               | 45             |                    |
| 0                                                     | 2                                                             | 17                                       | 0.626139435      | 0.185975074    |                    |
| 0.628069519                                           | 0                                                             | 0.026259191                              | 0.239104475      |                |                    |
| ENSG00000205710                                       | 10.41265508                                                   | 12.97731597                              | 13.68917783      | 0              |                    |
| 0                                                     | 2.943646558                                                   | 12.35971629                              | 0.981215519      |                |                    |
| 3.665264276                                           | 0.02456113                                                    | 1                                        | C17orf107        | 17             |                    |
| 4899418                                               | 4902932                                                       | +                                        | 3408             | protein_coding | chromosome 17 open |
| reading frame 107 [Source:HGNC Symbol;Acc:HGNC:37238] | -                                                             | 9                                        |                  |                |                    |
| 14                                                    | 14                                                            | 0                                        | 0                | 3              | 0.144423424        |
| 0.181118331                                           | 0.190296546                                                   | 0                                        | 0                | 0.041092986    |                    |
| ENSG00000112249                                       | 553.027681                                                    | 468.1103261                              | 453.6984651      |                |                    |
| 253.1537119                                           | 381.9934288                                                   | 391.5049923                              | 491.6121574      |                |                    |
| 342.2173777                                           | 0.521478728                                                   | 0.024593571                              | 0.116976331      |                | ASCC3              |
| 6                                                     | 100508194                                                     | 100881372                                | -                | 11731          |                    |
| protein_coding                                        | activating signal cointegrator 1 complex subunit 3            |                                          |                  |                |                    |
| [Source:HGNC Symbol;Acc:HGNC:18697]                   | -                                                             | 478                                      | 505              | 464            |                    |
| 252                                                   | 418                                                           | 399                                      | 2.228371393      | 1.897974186    |                    |
| 1.832252832                                           | 1.038644014                                                   | 1.552743946                              | 1.58775649       |                |                    |
| ENSG00000284820                                       | 23.13923351                                                   | 0                                        | 1.955596832      | 0              | 0                  |
| 0                                                     | 8.364943449                                                   | 0                                        | 5.551118115      | 0.024599708    |                    |
| 1                                                     | AC068946.2                                                    | 2                                        | 219209772        | 219222738      |                    |
| -                                                     | 5245                                                          | protein_coding                           | novel transcript | -              |                    |

|                          |                                                                                |             |                          |             |             |             |             |       |
|--------------------------|--------------------------------------------------------------------------------|-------------|--------------------------|-------------|-------------|-------------|-------------|-------|
|                          | 20                                                                             | 0           | 2                        | 0           | 0           | 0           | 0.208535125 |       |
|                          | 0                                                                              | 0.017663915 |                          | 0           | 0           | 0           |             |       |
| ENSG00000140022          | 188.5847531                                                                    |             |                          | 159.4355962 |             | 168.1813276 |             |       |
| 129.5905906              | 106.0077458                                                                    |             |                          | 53.96685357 |             | 172.0672256 |             |       |
| 96.52173                 | 0.833509841                                                                    |             |                          | 0.024617695 |             | 0.11705465  |             | STON2 |
|                          | 14                                                                             | 81260656    |                          | 81436465    |             | -           | 7812        |       |
| protein_coding           | stonin 2 [Source:HGNC Symbol;Acc:HGNC:30652]                                   |             |                          |             |             |             | -           |       |
|                          | 163                                                                            | 172         | 172                      | 129         | 116         | 55          | 1.141090481 |       |
|                          | 0.970733842                                                                    |             | 1.019926012              |             | 0.798415009 |             | 0.6470746   |       |
|                          | 0.328659727                                                                    |             |                          |             |             |             |             |       |
| ENSG00000279494          | 0                                                                              | 0           |                          | 4.888992081 |             | 31.14192488 |             |       |
| 11.88017841              | 6.868508636                                                                    |             |                          | 1.629664027 |             |             |             |       |
| 16.63020398              | -3.331548879                                                                   |             |                          | 0.024632703 |             | 1           | AL117328.2  |       |
|                          | 22                                                                             | 49851425    |                          | 49853364    |             | +           | 1940        |       |
| lincRNA novel transcript |                                                                                |             |                          | -           | 0           | 0           | 5           | 31    |
|                          | 13                                                                             | 7           | 0                        | 0           | 0.119390764 |             | 0.772611522 |       |
|                          | 0.292011678                                                                    |             | 0.16843888               |             |             |             |             |       |
| ENSG00000137269          | 409.5644332                                                                    |             |                          | 295.6974139 |             | 279.650347  |             |       |
| 173.7920324              | 213.8432113                                                                    |             |                          | 260.0221127 |             | 328.3040647 |             |       |
| 215.8857855              | 0.603191367                                                                    |             |                          | 0.024646764 |             | 0.117156432 |             | LRRC1 |
|                          | 6                                                                              | 53794497    |                          | 53924121    |             | +           | 4897        |       |
| protein_coding           | leucine rich repeat containing 1 [Source:HGNC Symbol;Acc:HGNC:14307]           |             |                          |             |             |             | -           |       |
|                          | 265                                                                            | 3.953373718 |                          | 2.872066802 |             | 286         | 173         | 234   |
| 1.708115429              | 2.082305044                                                                    |             |                          | 2.526165535 |             |             |             |       |
| ENSG00000128789          | 1206.711028                                                                    |             |                          | 865.7723656 |             | 1003.221175 |             |       |
| 693.1589732              | 805.110552                                                                     |             |                          | 823.2398208 |             | 1025.234856 |             |       |
| 773.8364487              | 0.404920325                                                                    |             |                          | 0.024663618 |             | 0.117200102 |             | PSMG2 |
|                          | 18                                                                             | 12658043    |                          | 12725740    |             | +           | 3356        |       |
| protein_coding           | proteasome assembly chaperone 2 [Source:HGNC Symbol;Acc:HGNC:24929]            |             |                          |             |             |             | -           |       |
|                          | 839                                                                            | 16.99640492 |                          | 1043        | 934         | 1026        | 690         | 881   |
| 9.940960658              | 11.43964517                                                                    |             |                          | 12.27040457 |             | 14.16210678 |             |       |
| ENSG00000262094          | 4.627846703                                                                    |             |                          | 11.67040814 |             |             |             |       |
|                          | 0                                                                              | 8.061271675 |                          | 0           | 19.55596832 | 0           | 0           |       |
|                          | 1                                                                              | AC139099.1  |                          | 0           | 5.504342234 | 0.024667647 |             |       |
|                          | -                                                                              | 2625        | lincRNA novel transcript | 17          | 83220527    | 83227721    |             |       |
|                          | 0                                                                              | 20          | 0                        | 0           | 0           | 0.083334608 |             | 4     |
|                          | 0.352941839                                                                    |             | 0                        | 0           |             |             |             | 0     |
| ENSG00000151247          | 1515.619795                                                                    |             |                          | 1272.703916 |             | 1256.470965 |             |       |
| 954.3493109              | 1131.358528                                                                    |             |                          | 1073.449778 |             | 1348.264892 |             |       |
| 1053.052539              | 0.355849551                                                                    |             |                          | 0.024686444 |             | 0.117272117 |             | EIF4E |
|                          | 4                                                                              | 98871684    |                          | 98930637    |             | -           | 14067       |       |
| protein_coding           | eukaryotic translation initiation factor 4E [Source:HGNC Symbol;Acc:HGNC:3287] |             |                          |             |             |             | -           |       |
|                          | 950                                                                            | 1238        | 1094                     | 5.092892637 |             | 1310        | 1373        | 1285  |
| 4.231595007              | 3.26530185                                                                     |             |                          | 3.835109381 |             | 4.303313716 |             |       |
| ENSG00000100664          | 8879.680861                                                                    |             |                          | 8208.152352 |             | 7466.468706 |             |       |
| 9806.692603              | 10246.19695                                                                    |             |                          | 9568.813746 |             | 8184.767306 |             |       |
| 9873.901098              | -0.270775773                                                                   |             |                          | 0.024699168 |             | 0.117283401 |             | EIF5  |

|                                    |                                                 |             |             |             |        |
|------------------------------------|-------------------------------------------------|-------------|-------------|-------------|--------|
| 14                                 | 103333544                                       | 103345025   | +           | 8505        |        |
| protein_coding                     | eukaryotic translation initiation factor 5      |             |             |             |        |
| [Source:HGNC Symbol;Acc:HGNC:3299] |                                                 | -           | 7675        | 8855        | 7636   |
| 9762                               | 11212                                           | 9752        | 49.35132065 | 45.90375422 |        |
| 41.59049197                        | 55.49651374                                     | 57.44700199 | 53.52607651 |             |        |
| ENSG00000165246                    | 207.09614                                       | 212.2718113 | 264.9833708 |             |        |
| 404.8450235                        | 265.0193645                                     | 352.2563715 | 228.1171073 |             |        |
| 340.7069198                        | -0.577616525                                    | 0.024704164 | 0.117283401 |             | NLGN4Y |
| Y                                  | 14522573                                        | 14845650    | +           | 8589        |        |
| protein_coding                     | neuroigin 4 Y-linked [Source:HGNC               |             |             |             |        |
| Symbol;Acc:HGNC:15529]             | -                                               | 179         | 229         | 271         | 403    |
| 359                                | 1.139738296                                     | 1.175511379 | 1.461602052 |             | 290    |
| 2.268629943                        | 1.471343222                                     | 1.951182453 |             |             |        |
| ENSG00000231365                    | 217.508795                                      | 234.5186386 | 208.2710626 |             |        |
| 331.5108133                        | 296.0906003                                     | 321.8386904 | 220.0994988 |             |        |
| 316.4800346                        | -0.523443572                                    | 0.024726546 | 0.117319502 |             |        |
| AL359915.2                         | 1                                               | 119140396   | 119275973   | +           | 5462   |
| antisense                          | uncharacterized LOC101929147 [Source:NCBI       |             |             |             |        |
| gene;Acc:101929147]                | -                                               | 188         | 253         | 213         | 330    |
| 328                                | 1.882352114                                     | 2.042221215 | 1.806468377 |             | 324    |
| 2.921214587                        | 2.584948602                                     | 2.803291007 |             |             |        |
| ENSG00000139579                    | 1263.40215                                      | 1360.764275 | 1525.365529 |             |        |
| 1052.797977                        | 987.8825275                                     | 1203.951442 | 1383.177318 |             |        |
| 1081.543982                        | 0.35530491                                      | 0.024727117 | 0.117319502 |             | NABP2  |
| 12                                 | 56222015                                        | 56229854    | +           | 2218        |        |
| protein_coding                     | nucleic acid binding protein 2 [Source:HGNC     |             |             |             |        |
| Symbol;Acc:HGNC:28412]             | -                                               | 1092        | 1468        | 1560        | 1048   |
| 1227                               | 26.92500603                                     | 29.18088585 | 32.58108271 |             | 1081   |
| 22.84551524                        | 21.23844665                                     | 25.82432964 |             |             |        |
| ENSG00000164346                    | 1420.748938                                     | 1522.053773 | 1486.253593 |             |        |
| 1090.971949                        | 1295.853306                                     | 1132.322709 | 1476.352101 |             |        |
| 1173.049322                        | 0.331720079                                     | 0.024764315 | 0.117459534 |             | NSA2   |
| 5                                  | 74766991                                        | 74780113    | +           | 4962        |        |
| protein_coding                     | "NSA2, ribosome biogenesis homolog [Source:HGNC |             |             |             |        |
| Symbol;Acc:HGNC:30728]"            | -                                               | 1228        | 1642        | 1520        | 1086   |
| 1154                               | 13.53431623                                     | 14.58983401 | 14.19022507 |             | 1418   |
| 10.58215898                        | 12.45311701                                     | 10.85663119 |             |             |        |
| ENSG00000185716                    | 601.6200714                                     | 532.996906  | 421.4311174 |             |        |
| 736.3558367                        | 657.9791117                                     | 711.3812516 | 518.6826982 |             |        |
| 701.9054                           | -0.437196639                                    | 0.024792162 | 0.117510163 |             | MOSMO  |
| 16                                 | 22007638                                        | 22087534    | +           | 6122        |        |
| protein_coding                     | modulator of smoothened [Source:HGNC            |             |             |             |        |
| Symbol;Acc:HGNC:27087]             | -                                               | 520         | 575         | 431         | 733    |
| 725                                | 4.645203356                                     | 4.141030959 | 3.261267336 |             | 720    |
| 5.789110855                        | 5.125046014                                     | 5.52828873  |             |             |        |
| ENSG00000006606                    | 1.156961676                                     | 4.634755704 | 7.822387329 |             |        |
| 39.17855066                        | 20.1049173                                      | 10.79337071 | 4.538034903 |             |        |
| 23.35894623                        | -2.347492524                                    | 0.024796474 | 0.117510163 |             | CCL26  |
| 7                                  | 75769533                                        | 75789896    | -           | 706         |        |
| protein_coding                     | C-C motif chemokine ligand 26 [Source:HGNC      |             |             |             |        |

|                                                                                                        |              |                      |                                    |             |             |        |
|--------------------------------------------------------------------------------------------------------|--------------|----------------------|------------------------------------|-------------|-------------|--------|
| Symbol;Acc:HGNC:10625]                                                                                 | -            | 1                    | 5                                  | 8           | 39          | 22     |
| 11                                                                                                     | 0.077462233  | 0.312247709          | 0.524913499                        |             |             |        |
| 2.67092149                                                                                             | 1.357927481  | 0.727334218          |                                    |             |             |        |
| ENSG00000226380                                                                                        | 94.87085741  | 50.98231275          | 65.51249388                        |             |             |        |
| 167.7645631                                                                                            | 93.2137075   | 135.4077417          | 70.45522135                        |             |             |        |
| 132.1286708                                                                                            | -0.910582345 | 0.02479805           | 0.117510163                        |             |             | LINC-  |
| PINT 7                                                                                                 | 130876809    | 130913310            | -                                  | 6619        |             |        |
| lincRNA "long intergenic non-protein coding RNA, p53 induced transcript [Source:NCBI gene;Acc:378805]" |              |                      |                                    |             |             |        |
| 67                                                                                                     | 167          | 102                  | 138                                | 0.67751074  | 0.366356808 | 55     |
| 0.468905015                                                                                            | 1.21990302   | 0.671531499          | 0.973268665                        |             |             |        |
| ENSG00000238250                                                                                        | 8.09873173   | 0                    | 15.64477466                        | 0           | 0           |        |
| 0                                                                                                      | 7.91450213   | 0                    | 5.476393249                        | 0.024801323 |             |        |
| 1                                                                                                      | ST6GAL2-IT1  | 2                    | 106822923                          | 106825031   |             |        |
| -                                                                                                      | 388          | sense_intronic       | ST6GAL2 intronic transcript 1      |             |             |        |
| [Source:HGNC Symbol;Acc:HGNC:41380]                                                                    | -            | 7                    | 0                                  | 16          |             |        |
| 0                                                                                                      | 0            | 0                    | 0.986645245                        | 0           | 1.910252219 |        |
| 0                                                                                                      | 0            | 0                    |                                    |             |             |        |
| ENSG00000181754                                                                                        | 85.615164    | 126.9923063          | 106.5800274                        |             |             |        |
| 176.8057671                                                                                            | 163.5809181  | 183.4873021          | 106.3958326                        |             |             |        |
| 174.6246624                                                                                            | -0.711941446 | 0.024816611          | 0.117556851                        |             |             | AMIG01 |
| 1                                                                                                      | 109504175    | 109509738            | -                                  | 5144        |             |        |
| protein_coding adhesion molecule with Ig like domain 1 [Source:HGNC Symbol;Acc:HGNC:20824]             |              |                      |                                    |             |             |        |
| -                                                                                                      | 74           | 137                  | 109                                | 176         | 179         |        |
| 187                                                                                                    | 0.786729568  | 1.174231064          | 0.981585182                        |             |             |        |
| 1.654294875                                                                                            | 1.516389152  | 1.697018913          |                                    |             |             |        |
| ENSG00000128262                                                                                        | 8.09873173   | 2.780853423          | 8.800185745                        | 0           |             |        |
| 0                                                                                                      | 0            | 6.559923633          | 0                                  | 5.204808641 |             |        |
| 0.024822991                                                                                            | 1            | POM121L9P            | 22                                 | 24251828    |             |        |
| 24265525                                                                                               | +            | 5137                 | transcribed_unprocessed_pseudogene |             |             |        |
| "POM121 transmembrane nucleoporin like 9, pseudogene [Source:HGNC Symbol;Acc:HGNC:30080]"              |              |                      |                                    |             |             |        |
| -                                                                                                      | 7            | 3                    | 9                                  |             |             |        |
| 0                                                                                                      | 0            | 0                    | 0.074521774                        | 0.025748127 |             |        |
| 0.081158759                                                                                            | 0            | 0                    | 0                                  |             |             |        |
| ENSG00000257605                                                                                        | 3.470885027  | 10.19646255          | 13.68917783                        |             |             |        |
| 44.20144177                                                                                            | 27.41579632  | 26.49281903          | 9.118841801                        |             |             |        |
| 32.70335237                                                                                            | -1.830356893 | 0.024823282          | 0.117556851                        |             |             |        |
| AC073611.1                                                                                             | 12           | 53298655             | 53300314                           | -           | 647         |        |
| antisense "novel transcript, antisense to PFDN5 and C12orf10"                                          |              |                      |                                    |             |             |        |
| -                                                                                                      | 3            | 11                   | 14                                 | 44          | 30          | 27     |
| 0.253578067                                                                                            | 0.749587546  | 1.002365732          | 3.288134791                        |             |             |        |
| 2.020577775                                                                                            | 1.948074311  |                      |                                    |             |             |        |
| ENSG00000251288                                                                                        | 0            | 0                    | 0                                  | 14.06409511 | 10.05245865 |        |
| 0                                                                                                      | 0            | 8.038851253          | -5.426794997                       | 0.024831085 |             |        |
| 1                                                                                                      | AC018797.3   | 4                    | 102751401                          | 102752641   |             |        |
| +                                                                                                      | 1241         | processed_pseudogene | WD repeat domain 12                |             |             |        |
| (WDR12) pseudogene                                                                                     | -            | 0                    | 0                                  | 0           | 14          | 11     |
| 0                                                                                                      | 0            | 0                    | 0                                  | 0.545453171 | 0.386259791 |        |
| 0                                                                                                      |              |                      |                                    |             |             |        |
| ENSG00000168528                                                                                        | 441.9593601  | 233.5916875          | 407.7419395                        |             |             |        |

|                                     |                                                        |             |             |               |                |
|-------------------------------------|--------------------------------------------------------|-------------|-------------|---------------|----------------|
| 276.2590111                         | 229.3788292                                            | 186.4309487 | 361.0976624 |               |                |
| 230.6895963                         | 0.645294932                                            | 0.02483718  | 0.117586239 |               |                |
| SERINC2 1                           | 31409565                                               | 31434680    | +           | 3549          |                |
| protein_coding                      | serine incorporator 2 [Source:HGNC                     |             |             |               |                |
| Symbol;Acc:HGNC:23231]              | -                                                      | 382         | 252         | 417           | 275            |
| 190                                 | 5.886431253                                            | 3.130606621 | 5.442927022 |               | 251            |
| 3.746518755                         | 3.081955189                                            | 2.499157561 |             |               |                |
| ENSG00000174915                     | 566.9112211                                            | 622.9111666 | 832.1064522 |               |                |
| 935.2623247                         | 794.1442335                                            | 1015.558063 | 673.97628   |               |                |
| 914.9882069                         | -0.440253032                                           | 0.024898988 | 0.117823054 |               | PTDSS2         |
| 11                                  | 448268                                                 | 491399      | +           | 6113          | protein_coding |
| phosphatidylserine synthase 2       | [Source:HGNC Symbol;Acc:HGNC:15463]                    |             |             |               |                |
| -                                   | 490                                                    | 672         | 851         | 931           | 869            |
| 4.3836553                           | 4.846730093                                            | 6.448780874 | 7.363707033 | 1035          |                |
| 6.194752768                         | 7.90372807                                             |             |             |               |                |
| ENSG00000230555                     | 5.784808379                                            | 21.31987624 | 13.68917783 |               |                |
| 47.21517644                         | 46.60685375                                            | 31.39889662 | 13.59795415 |               |                |
| 41.74030894                         | -1.606658087                                           | 0.024902616 | 0.117823054 |               |                |
| AL450326.1                          | 10                                                     | 43420738    | 43422100    | +             | 760            |
| lincRNA                             | novel transcript                                       |             | -           | 5             | 23             |
| 47                                  | 51                                                     | 32          | 0.359791687 | 1.334283765   | 14             |
| 0.853329774                         | 2.990098411                                            | 2.924254599 | 1.965542423 |               |                |
| ENSG00000236682                     | 8.09873173                                             | 5.561706845 | 10.75578258 |               | 0              |
| 0                                   | 0.981215519                                            | 8.138740384 | 0.32707184  |               |                |
| 4.555476219                         | 0.024918575                                            | 1           | AC068282.1  | 2             |                |
| 127389130                           | 127400580                                              | +           | 2690        | lincRNA novel |                |
| transcript                          | -                                                      | 7           | 6           | 11            | 0              |
| 0.142311656                         | 0.098340617                                            | 0.189427427 | 0           | 0             | 1              |
| 0.017353767                         |                                                        |             |             |               | 0              |
| ENSG0000034053                      | 738.1415491                                            | 1101.217955 | 987.5764003 |               |                |
| 1406.409511                         | 1174.309942                                            | 1180.40227  | 942.3119683 |               |                |
| 1253.707241                         | -0.410820074                                           | 0.024926164 | 0.117897981 |               | APBA2          |
| 15                                  | 28884483                                               | 29118315    | +           | 6869          |                |
| protein_coding                      | amyloid beta precursor protein binding family A member |             |             |               |                |
| 2 [Source:HGNC Symbol;Acc:HGNC:579] | -                                                      |             | 638         | 1188          | 1010           |
| 1400                                | 1285                                                   | 1203        | 5.079510648 | 7.625299079   |                |
| 6.811304772                         | 9.854525912                                            | 8.152075797 | 8.175571985 |               |                |
| ENSG0000033178                      | 2406.480285                                            | 1958.647761 | 1777.637521 |               |                |
| 1657.554066                         | 1642.2062                                              | 1532.658641 | 2047.588522 |               |                |
| 1610.806302                         | 0.345670415                                            | 0.024986927 | 0.118148826 |               | UBA6           |
| 4                                   | 67612652                                               | 67701179    | -           | 11432         |                |
| protein_coding                      | ubiquitin like modifier activating enzyme 6            |             |             |               |                |
| [Source:HGNC Symbol;Acc:HGNC:25581] | -                                                      |             | 2080        | 2113          | 1818           |
| 1650                                | 1797                                                   | 1562        | 9.950292143 | 8.149129873   |                |
| 7.366719249                         | 6.978513853                                            | 6.849903591 | 6.37829864  |               |                |
| ENSG00000215861                     | 4.627846703                                            | 24.10072966 | 21.51156516 |               |                |
| 43.19686355                         | 56.6593124                                             | 48.07956045 | 16.74671384 |               |                |
| 49.31191213                         | -1.546712571                                           | 0.025018118 | 0.11825973  |               |                |
| AC245297.1                          | 1                                                      | 149197992   | 149321732   | -             | 933            |
| unprocessed_pseudogene              | phosphodiesterase 4D interacting                       |             |             |               |                |



|                                                                |              |             |                                     |
|----------------------------------------------------------------|--------------|-------------|-------------------------------------|
| protein-like [Source:NCBI gene;Acc:653513]                     | -            | 4           | 26                                  |
| 22                                                             | 43           | 62          | 49                                  |
| 1.092303922                                                    | 2.228373722  | 2.895800532 | 2.451661302                         |
| ENSG00000182307                                                | 3131.895256  | 3403.764589 | 3000.863339                         |
| 3924.887113                                                    | 3901.267817  | 3733.525052 | 3178.841062                         |
| 3853.226661                                                    | -0.277485583 | 0.025047347 | 0.118361296                         |
| C8orf33 8                                                      | 145052378    | 145066685   | + 4440                              |
| protein_coding chromosome 8 open reading frame 33 [Source:HGNC |              |             |                                     |
| Symbol;Acc:HGNC:26104]                                         | -            | 2707        | 3672                                |
| 3805                                                           | 33.34264115  | 36.46310604 | 32.01963479                         |
| 42.54628624                                                    | 41.89881907  | 40.00531799 |                                     |
| ENSG00000199133                                                | 8.09873173   | 7.415609127 | 3.911193665                         |
| 0                                                              | 0            | 6.475178174 | 0                                   |
| 0.025061448                                                    | 1            | MIRLET7D    | 9                                   |
| 94178920                                                       | +            | 87          | miRNA microRNA let-7d [Source:HGNC  |
| Symbol;Acc:HGNC:31481]                                         | -            | 7           | 8                                   |
| 0                                                              | 4.400210977  | 4.054195547 | 2.12982144                          |
| 0                                                              | 0            |             | 0                                   |
| ENSG00000198931                                                | 2121.867713  | 3310.142524 | 3707.811594                         |
| 4087.628785                                                    | 3452.562617  | 4769.68864  | 3046.607277                         |
| 4103.293347                                                    | -0.429182326 | 0.025088845 | 0.118520757                         |
| 16                                                             | 88809339     | 88811944    | - 1803                              |
| protein_coding adenine phosphoribosyltransferase [Source:HGNC  |              |             |                                     |
| Symbol;Acc:HGNC:626]                                           | -            | 1834        | 3571                                |
| 4861                                                           | 55.62862397  | 87.32288617 | 97.42604163                         |
| 109.1171916                                                    | 91.31136281  | 125.8565812 |                                     |
| ENSG00000269416                                                | 6.941770054  | 3.707804563 | 8.800185745                         |
| 0                                                              | 0            | 6.483253454 | 0                                   |
| 0.025129937                                                    | 1            | LINC01224   | 19                                  |
| 23416075                                                       | -            | 3296        | lincRNA long intergenic non-protein |
| coding RNA 1224 [Source:HGNC Symbol;Acc:HGNC:49676]            | -            |             | 6                                   |
| 4                                                              | 9            | 0           | 0                                   |
| 0.053506525                                                    | 0.126490457  | 0           | 0                                   |
| ENSG00000122970                                                | 472.0403637  | 510.7500786 | 469.3432398                         |
| 335.5291262                                                    | 426.7725628  | 222.7359229 | 484.0445607                         |
| 328.3458706                                                    | 0.559448676  | 0.025148277 | 0.118764819                         |
| 12                                                             | 110124335    | 110218797   | + 7005                              |
| protein_coding intraflagellar transport 81 [Source:HGNC        |              |             |                                     |
| Symbol;Acc:HGNC:14313]                                         | -            | 408         | 551                                 |
| 227                                                            | 3.185273557  | 3.467986652 | 3.174209255                         |
| 2.305364194                                                    | 2.905141824  | 1.512738128 |                                     |
| ENSG00000198482                                                | 75.20250892  | 116.7958437 | 71.37928438                         |
| 225.0255217                                                    | 151.7007397  | 105.9712761 | 87.79254568                         |
| 160.8991792                                                    | -0.871544694 | 0.025160467 | 0.118785687                         |
| 19                                                             | 52527652     | 52564464    | + 5008                              |
| protein_coding zinc finger protein 808 [Source:HGNC            |              |             |                                     |
| Symbol;Acc:HGNC:33230]                                         | zf-C2H2      | 65          | 126                                 |
| 108                                                            | 0.709812673  | 1.109277446 | 0.675244407                         |
| 2.162643402                                                    | 1.444449509  | 1.006712523 |                                     |
| ENSG00000089818                                                | 822.5997514  | 705.4098182 | 607.2128164                         |

|                                                                                                                             |              |             |             |                |
|-----------------------------------------------------------------------------------------------------------------------------|--------------|-------------|-------------|----------------|
| 1173.347363                                                                                                                 | 753.020539   | 997.8961833 | 711.7407954 |                |
| 974.7546952                                                                                                                 | -0.453989715 | 0.025185079 | 0.118865176 | NECAP1         |
| 12                                                                                                                          | 8076939      | 8097859 +   | 8763        | protein_coding |
| endocytosis associated 1 [Source:HGNC Symbol;Acc:HGNC:24539]                                                                |              |             |             | NECAP          |
| 711                                                                                                                         | 761          | 621         | 1168        | 824            |
| 3.828827522                                                                                                                 | 3.282775959  | 6.444529968 | 4.437225517 | 1017           |
| 5.417690324                                                                                                                 |              |             | 4.097632425 |                |
| ENSG00000143793                                                                                                             | 555.3416043  | 794.3971277 | 646.3247531 |                |
| 824.7587203                                                                                                                 | 875.4777626  | 969.4409332 | 665.354495  |                |
| 889.892472                                                                                                                  | -0.418402162 | 0.025232864 | 0.119053948 |                |
| C1orf35 1                                                                                                                   | 228100726    | 228105411   | -           | 4308           |
| protein_coding chromosome 1 open reading frame 35 [Source:HGNC Symbol;Acc:HGNC:19032]                                       | -            | 480         | 857         | 661            |
| 988                                                                                                                         | 6.093407959  | 8.770797523 | 7.10768579  | 821            |
| 9.214434325                                                                                                                 | 9.690549676  | 10.70600115 |             | 958            |
| ENSG00000184599                                                                                                             | 43.96454368  | 54.69011731 | 8.800185745 |                |
| 76.34794487                                                                                                                 | 74.93650995  | 115.7834313 | 35.81828224 |                |
| 89.02262871                                                                                                                 | -1.313996842 | 0.025261935 | 0.119154333 |                |
| FAM19A3 1                                                                                                                   | 112720419    | 112727235   | +           | 1282           |
| protein_coding "family with sequence similarity 19 member A3, C-C motif chemokine like [Source:HGNC Symbol;Acc:HGNC:21590]" |              |             |             | -              |
| 38                                                                                                                          | 59           | 9           | 76          | 82             |
| 2.029074273                                                                                                                 | 0.325204795  | 2.866333923 | 1.621027133 | 118            |
| 4.29674933                                                                                                                  |              |             | 2.787304558 |                |
| ENSG00000198700                                                                                                             | 4532.975845  | 3852.408941 | 4901.70346  |                |
| 3858.584951                                                                                                                 | 3463.528935  | 3415.611223 | 4429.029416 |                |
| 3579.241703                                                                                                                 | 0.307289331  | 0.025288786 | 0.11924419  | IP09           |
| 1                                                                                                                           | 201829141    | 201884294   | +           | 11915          |
| protein_coding importin 9 [Source:HGNC Symbol;Acc:HGNC:19425]                                                               |              |             |             | -              |
| 3918                                                                                                                        | 4156         | 5013        | 3841        | 3790           |
| 15.37855217                                                                                                                 | 19.48974306  | 15.58660311 | 17.98312229 | 3481           |
| 13.63816726                                                                                                                 |              |             | 13.86129355 |                |
| ENSG00000161509                                                                                                             | 34.70885027  | 19.46597396 | 50.84551764 |                |
| 99.45324398                                                                                                                 | 83.16124884  | 54.94806909 | 35.00678062 |                |
| 79.18752064                                                                                                                 | -1.178974091 | 0.025310131 | 0.11925717  | GRIN2C         |
| 17                                                                                                                          | 74842023     | 74861504    | -           | 8574           |
| protein_coding glutamate ionotropic receptor NMDA type subunit 2C [Source:HGNC Symbol;Acc:HGNC:4587]                        |              |             |             | 30             |
| 99                                                                                                                          | 91           | 56          | 0.191351772 | 0.107986577    |
| 0.280945655                                                                                                                 | 0.558281108  | 0.462505084 | 0.304895197 |                |
| ENSG00000162231                                                                                                             | 2024.682933  | 2144.96494  | 2060.221263 |                |
| 2658.113975                                                                                                                 | 2532.30572   | 2412.808962 | 2076.623045 |                |
| 2534.409553                                                                                                                 | -0.287272111 | 0.02532093  | 0.11925717  | NXF1           |
| 11                                                                                                                          | 62792123     | 62806302    | -           | 6194           |
| protein_coding nuclear RNA export factor 1 [Source:HGNC Symbol;Acc:HGNC:8071]                                               |              |             |             | -              |
| 2459                                                                                                                        | 15.45117674  | 16.47123303 | 15.75780749 | 2771           |
| 20.65474584                                                                                                                 | 19.49503066  | 18.53247247 |             |                |
| ENSG00000224032                                                                                                             | 418.8201266  | 367.9996029 | 232.716023  |                |
| 512.3348932                                                                                                                 | 478.8625758  | 490.6077597 | 339.8452509 |                |

|                                                 |                                                        |                        |             |                      |           |
|-------------------------------------------------|--------------------------------------------------------|------------------------|-------------|----------------------|-----------|
| 493.9350762                                     | -0.540608519                                           | 0.025322427            | 0.11925717  |                      |           |
| EPB41L4A-AS1                                    | 5                                                      | 112160526              | 112164276   | +                    | 3344      |
| lincRNA EPB41L4A antisense RNA 1 [Source:HGNC   |                                                        |                        |             |                      |           |
| Symbol;Acc:HGNC:30749]                          | -                                                      | 362                    | 397         | 238                  | 510       |
| 500                                             | 5.920208669                                            | 5.234295007            | 3.296955946 |                      | 524       |
| 7.374033798                                     | 6.828473305                                            | 6.979909174            |             |                      |           |
| ENSG00000123349                                 | 2364.829665                                            | 2357.236751            | 2587.254609 |                      |           |
| 2706.33373                                      | 2999.288118                                            | 3327.301827            | 2436.440342 |                      |           |
| 3010.974558                                     | -0.305428213                                           | 0.02532348             | 0.11925717  |                      | PFDN5     |
| 12                                              | 53295291                                               | 53299450               | +           | 3380                 |           |
| protein_coding                                  | prefoldin subunit 5 [Source:HGNC Symbol;Acc:HGNC:8869] |                        |             |                      |           |
| -                                               | 2044                                                   | 2543                   | 2646        | 2694                 | 3282 3391 |
| 33.07188156                                     | 33.17138599                                            | 36.26399076            | 38.5373731  |                      |           |
| 42.31364851                                     | 46.83355503                                            |                        |             |                      |           |
| ENSG00000272752                                 | 1.156961676                                            | 0                      | 0           | 23.10529911          | 0         |
| 7.849724156                                     | 0.385653892                                            | 10.31834109            | -4.82329766 |                      |           |
| 0.025330743                                     | 1                                                      | STAG3L5P-PVRIG2P-PILRB | 7           |                      |           |
| 100336104                                       | 100367831                                              | +                      | 3816        | processed_transcript |           |
| STAG3L5P-PVRIG2P-PILRB readthrough [Source:HGNC |                                                        |                        |             |                      |           |
| Symbol;Acc:HGNC:48898]                          | -                                                      | 1                      | 0           | 0                    | 23 0      |
| 8                                               | 0.014331325                                            | 0                      | 0           | 0.291420894          | 0         |
| 0.097865058                                     |                                                        |                        |             |                      |           |
| ENSG00000141699                                 | 994.9870411                                            | 1009.449792            | 1121.534783 |                      |           |
| 1140.196282                                     | 1495.988619                                            | 1385.476313            | 1041.990539 |                      |           |
| 1340.553738                                     | -0.36354624                                            | 0.025336297            | 0.11925717  |                      |           |
| RETREG3                                         | 17                                                     | 42579513               | 42610623    | -                    | 5145      |
| protein_coding                                  | reticulophagy regulator family member 3 [Source:HGNC   |                        |             |                      |           |
| Symbol;Acc:HGNC:27258]                          | -                                                      | 860                    | 1089        | 1147                 | 1135 1637 |
| 1412                                            | 9.141296274                                            | 9.332037142            | 10.32715023 |                      |           |
| 10.66624853                                     | 13.86506462                                            | 12.81136349            |             |                      |           |
| ENSG00000162923                                 | 3852.68238                                             | 3969.204785            | 3910.215866 |                      |           |
| 4708.458127                                     | 4673.479413                                            | 4650.961562            | 3910.70101  |                      |           |
| 4677.633034                                     | -0.258305685                                           | 0.025338346            | 0.11925717  |                      | WDR26     |
| 1                                               | 224385143                                              | 224437033              | -           | 10976                |           |
| protein_coding                                  | WD repeat domain 26 [Source:HGNC                       |                        |             |                      |           |
| Symbol;Acc:HGNC:21208]                          | -                                                      | 3330                   | 4282        | 3999                 | 4687 5114 |
| 4740                                            | 16.59185134                                            | 17.20031984            | 16.87756392 |                      |           |
| 20.64676771                                     | 20.30370165                                            | 20.15952426            |             |                      |           |
| ENSG00000113739                                 | 669.8808102                                            | 645.157994             | 572.0120735 |                      |           |
| 741.3787279                                     | 845.3203866                                            | 882.112752             | 629.0169592 |                      |           |
| 822.9372888                                     | -0.388153337                                           | 0.025361599            | 0.119329873 |                      | STC2      |
| 5                                               | 173314713                                              | 173329503              | -           | 6128                 |           |
| protein_coding                                  | stanniocalcin 2 [Source:HGNC Symbol;Acc:HGNC:11374]    |                        |             |                      |           |
| -                                               | 579                                                    | 696                    | 585         | 738                  | 925 899   |
| 5.167191056                                     | 5.00754016                                             | 4.422212066            | 5.822893161 |                      |           |
| 6.577813773                                     | 6.848366134                                            |                        |             |                      |           |
| ENSG00000233892                                 | 13.88354011                                            | 0.926951141            | 5.866790497 |                      | 0         |
| 0                                               | 0                                                      | 6.892427249            | 0           | 5.272789315          |           |
| 0.02537568                                      | 1                                                      | PAIP1P1                | 6           | 30186798             | 30188614  |
| -                                               | 1203                                                   | processed_pseudogene   |             | poly(A)              | binding   |

|                                                                                                   |              |                |             |                   |                |        |
|---------------------------------------------------------------------------------------------------|--------------|----------------|-------------|-------------------|----------------|--------|
| protein interacting protein 1 pseudogene 1 [Source:HGNC<br>Symbol;Acc:HGNC:18240]                 | -            | 12             | 1           | 6                 | 0              | 0      |
| 0                                                                                                 | 0.545519565  | 0.036649523    | 0.23104048  | 0                 | 0              | 0      |
| 0                                                                                                 | 0            |                |             |                   |                |        |
| ENSG00000115541                                                                                   | 673.3516953  | 1067.847714    | 912.2859223 |                   |                |        |
| 619.824763                                                                                        | 604.061379   | 720.2121913    | 884.4951106 |                   |                |        |
| 648.0327778                                                                                       | 0.44987293   | 0.025408576    | 0.119514122 |                   |                | HSPE1  |
| 2                                                                                                 | 197499994    | 197503457      | +           | 1977              |                |        |
| protein_coding heat shock protein family E (Hsp10) member 1<br>[Source:HGNC Symbol;Acc:HGNC:5269] | -            | 582            | 1152        |                   |                | 933    |
| 617                                                                                               | 661          | 734            | 16.09944957 | 25.69092656       |                |        |
| 21.8613728                                                                                        | 15.08966892  | 14.56979321    | 17.33147107 |                   |                |        |
| ENSG00000198160                                                                                   | 1593.136227  | 1395.988418    | 1200.736455 |                   |                |        |
| 1019.646895                                                                                       | 1257.471191  | 897.8122003    | 1396.620367 |                   |                |        |
| 1058.310096                                                                                       | 0.399533492  | 0.025431067    | 0.119583118 |                   |                | MIER1  |
| 1                                                                                                 | 66924895     | 66988619       | +           | 8273              |                |        |
| protein_coding MIER1 transcriptional regulator [Source:HGNC<br>Symbol;Acc:HGNC:29657]             | Others       | 1377           | 1506        | 1228              | 1015           | 1376   |
| 915                                                                                               | 9.102603562  | 8.02593994     | 6.876030561 |                   |                |        |
| 5.932042234                                                                                       | 7.247930284  | 5.163023545    |             |                   |                |        |
| ENSG00000198910                                                                                   | 1.156961676  | 6.488657986    | 12.71137941 |                   |                | 0      |
| 0                                                                                                 | 0            | 6.785666357    | 0           | 5.258747904       |                |        |
| 0.025438524                                                                                       | 1            | L1CAM          | X           | 153861514         | 153886174      |        |
| -                                                                                                 | 7270         | protein_coding | L1 cell     | adhesion molecule |                |        |
| [Source:HGNC Symbol;Acc:HGNC:6470]                                                                | -            | 1              | 7           |                   |                | 13     |
| 0                                                                                                 | 0            | 0              | 0.007522467 | 0.042451944       |                |        |
| 0.082834527                                                                                       | 0            | 0              | 0           |                   |                |        |
| ENSG00000141101                                                                                   | 1196.298373  | 1474.779265    | 1522.432134 |                   |                |        |
| 1717.82876                                                                                        | 1710.745691  | 1878.046504    | 1397.836591 |                   |                |        |
| 1768.873651                                                                                       | -0.339021814 | 0.025467162    | 0.119716023 |                   |                | NOB1   |
| 16                                                                                                | 69741867     | 69754940       | -           | 2119              |                |        |
| protein_coding NIN1 (RPN12) binding protein 1 homolog [Source:HGNC<br>Symbol;Acc:HGNC:29540]      | -            | 1034           | 1591        | 1557              | 1710           | 1872   |
| 1914                                                                                              | 26.68604996  | 33.10344414    | 34.03769259 |                   |                |        |
| 39.0181227                                                                                        | 38.4975849   | 42.1654765     |             |                   |                |        |
| ENSG00000127586                                                                                   | 1165.060407  | 1480.340972    | 1639.767944 |                   |                |        |
| 1090.971949                                                                                       | 988.7963874  | 1203.951442    | 1428.389774 |                   |                |        |
| 1094.57326                                                                                        | 0.384702856  | 0.025477487    | 0.119727742 |                   |                | CHTF18 |
| 16                                                                                                | 788046       | 800737         | +           | 5916              | protein_coding |        |
| chromosome transmission fidelity factor 18 [Source:HGNC<br>Symbol;Acc:HGNC:18435]                 | -            | 1007           | 1597        | 1677              | 1086           | 1082   |
| 1227                                                                                              | 9.308849693  | 11.90174686    | 13.1312888  |                   |                |        |
| 8.875705351                                                                                       | 7.969988471  | 9.681941032    |             |                   |                |        |
| ENSG00000023171                                                                                   | 286.9264956  | 289.2087559    | 389.1637696 |                   |                |        |
| 564.5729608                                                                                       | 413.9785245  | 411.1293027    | 321.7663404 |                   |                |        |
| 463.2269293                                                                                       | -0.524860336 | 0.025487763    | 0.119739222 |                   |                |        |
| GRAMD1B 11                                                                                        | 123358428    | 123627774      | +           | 14863             |                |        |
| protein_coding GRAM domain containing 1B [Source:HGNC<br>Symbol;Acc:HGNC:29214]                   | -            | 248            | 312         | 398               | 562            | 453    |
| 419                                                                                               | 0.912514797  | 0.925512043    | 1.240449391 |                   |                |        |

|                                     |                                                    |             |             |                |      |             |
|-------------------------------------|----------------------------------------------------|-------------|-------------|----------------|------|-------------|
| 1.828230939                         | 1.328159772                                        | 1.315993005 |             |                |      |             |
| ENSG00000155792                     | 37.02277362                                        | 17.61207168 | 23.46716199 |                |      |             |
| 79.36167954                         | 47.52071363                                        | 58.87293117 | 26.03400243 |                |      |             |
| 61.91844144                         | -1.256254407                                       | 0.025507452 | 0.119794907 | DEPTOR         |      |             |
| 8                                   | 119873717                                          | 120050913   | + 2622      |                |      |             |
| protein_coding                      | DEP domain containing MTOR interacting protein     |             |             |                |      |             |
| [Source:HGNC Symbol;Acc:HGNC:22953] | -                                                  | 32          | 19          | 24             |      |             |
| 79                                  | 52                                                 | 60          | 0.667439651 | 0.319488236    |      |             |
| 0.424014795                         | 1.456785535                                        | 0.864229833 | 1.068229578 |                |      |             |
| ENSG00000170581                     | 974.161731                                         | 1015.93845  | 818.4172743 |                |      |             |
| 1174.351942                         | 1369.875956                                        | 1095.03652  | 936.1724852 |                |      |             |
| 1213.088139                         | -0.37409751                                        | 0.025523345 | 0.119832731 | STAT2          |      |             |
| 12                                  | 56341597                                           | 56360155    | - 6109      |                |      |             |
| protein_coding                      | signal transducer and activator of transcription 2 |             |             |                |      |             |
| [Source:HGNC Symbol;Acc:HGNC:11363] | STAT                                               | 842         | 1096        | 837            |      |             |
| 1169                                | 1499                                               | 1116        | 7.537662347 | 7.909961815    |      |             |
| 6.346843486                         | 9.252212578                                        | 10.69276705 | 8.52786085  |                |      |             |
| ENSG00000153443                     | 348.2454644                                        | 448.6443522 | 476.1878287 |                |      |             |
| 757.4519794                         | 469.723977                                         | 588.7293117 | 424.3592151 |                |      |             |
| 605.301756                          | -0.510886104                                       | 0.025534887 | 0.119850113 | UBALD1         |      |             |
| 16                                  | 4608883                                            | 4615027     | - 3619      | protein_coding | UBA  |             |
| like domain containing 1            | [Source:HGNC Symbol;Acc:HGNC:29576]                |             |             | -              |      |             |
| 301                                 | 484                                                | 487         | 754         | 514            | 600  | 4.548546357 |
| 5.896451579                         | 6.233656022                                        | 10.07358324 | 6.189180287 |                |      |             |
| 7.739425127                         |                                                    |             |             |                |      |             |
| ENSG00000159176                     | 4145.393684                                        | 4855.370076 | 4160.532261 |                |      |             |
| 5317.232529                         | 4936.671058                                        | 5915.748367 | 4387.098674 |                |      |             |
| 5389.883985                         | -0.296818199                                       | 0.025543972 | 0.119855957 | CSRP1          |      |             |
| 1                                   | 201483530                                          | 201509456   | - 10318     |                |      |             |
| protein_coding                      | cysteine and glycine rich protein 1 [Source:HGNC   |             |             |                |      |             |
| Symbol;Acc:HGNC:2469]               | -                                                  | 3583        | 5238        | 4255           | 5293 | 5402        |
| 6029                                | 18.9909197                                         | 22.3822596  | 19.10321646 |                |      |             |
| 24.80319267                         | 22.81485191                                        | 27.27694928 |             |                |      |             |
| ENSG00000197355                     | 539.1441409                                        | 788.8354209 | 867.3071951 |                |      |             |
| 458.0876692                         | 513.5892511                                        | 598.5414669 | 731.7622523 |                |      |             |
| 523.4061291                         | 0.484392991                                        | 0.025556711 | 0.119862567 | UAP1L1         |      |             |
| 9                                   | 137077501                                          | 137084539   | + 5283      |                |      |             |
| protein_coding                      | UDP-N-acetylglucosamine pyrophosphorylase 1 like 1 |             |             |                |      |             |
| [Source:HGNC Symbol;Acc:HGNC:28082] | -                                                  | 466         | 851         | 887            |      |             |
| 456                                 | 562                                                | 610         | 4.823919133 | 7.102036621    |      |             |
| 7.777597515                         | 4.173356149                                        | 4.635689111 | 5.390080609 |                |      |             |
| ENSG00000183864                     | 802.9314029                                        | 779.5659095 | 894.6855508 |                |      |             |
| 1073.894119                         | 1192.58714                                         | 940.0044677 | 825.7276211 |                |      |             |
| 1068.828576                         | -0.372407873                                       | 0.025561063 | 0.119862567 | T0B2           |      |             |
| 22                                  | 41433492                                           | 41447023    | - 4565      |                |      |             |
| protein_coding                      | "transducer of ERBB2, 2 [Source:HGNC               |             |             |                |      |             |
| Symbol;Acc:HGNC:11980]"             | -                                                  | 694         | 841         | 915            | 1069 | 1305        |
| 958                                 | 8.314064728                                        | 8.122489749 | 9.285018385 |                |      |             |
| 11.32239078                         | 12.45742633                                        | 9.796495945 |             |                |      |             |
| ENSG00000129103                     | 1733.12859                                         | 1642.557422 | 1744.392374 |                |      |             |

|                                       |                                                     |             |                  |             |
|---------------------------------------|-----------------------------------------------------|-------------|------------------|-------------|
| 1227.594587                           | 1520.662836                                         | 1329.547029 | 1706.692795      |             |
| 1359.268151                           | 0.328055478                                         | 0.025589503 | 0.119946711      | SUMF2       |
| 7                                     | 56064002                                            | 56080670    | + 4101           |             |
| protein_coding                        | sulfatase modifying factor 2 [Source:HGNC           |             |                  |             |
| Symbol;Acc:HGNC:20415]                | -                                                   | 1498 1772   | 1784 1222        | 1664        |
| 1355                                  | 19.97637844                                         | 19.05056701 | 20.15150732      |             |
| 14.40730178                           | 17.68162397                                         | 15.42394833 |                  |             |
| ENSG00000175906                       | 160.8176729                                         | 237.2994921 | 224.8936357      |             |
| 339.547439                            | 300.6598997                                         | 288.4773627 | 207.6702669      |             |
| 309.5615671                           | -0.573532787                                        | 0.0255947   | 0.119946711      | ARL4D       |
| 17                                    | 43398959                                            | 43401137    | + 1612           |             |
| protein_coding                        | ADP ribosylation factor like GTPase 4D [Source:HGNC |             |                  |             |
| Symbol;Acc:HGNC:656]                  | -                                                   | 139 256     | 230 338          | 329         |
| 294                                   | 4.715681615                                         | 7.001786851 | 6.609448978      |             |
| 10.13801383                           | 8.89384299                                          | 8.513895764 |                  |             |
| ENSG00000172270                       | 14740.84871                                         | 14160.10563 | 19149.20418      |             |
| 11747.53773                           | 11991.66931                                         | 14496.47808 | 16016.71951      |             |
| 12745.22837                           | 0.32964247                                          | 0.02560892  | 0.119976574      | BSG         |
| 19                                    | 571277 583493                                       | + 3797      | protein_coding   |             |
| basigin (Ok blood group) [Source:HGNC | Symbol;Acc:HGNC:1116]                               |             |                  | -           |
| 12741                                 | 15276 19584                                         | 11694 13122 | 14774 183.509111 |             |
| 177.3793302                           | 238.9259157                                         | 148.9099469 | 150.5975942      |             |
| 181.6366709                           |                                                     |             |                  |             |
| ENSG00000183506                       | 179.3290597                                         | 260.4732706 | 270.8501613      |             |
| 159.7279373                           | 116.9740643                                         | 170.7315004 | 236.8841639      |             |
| 149.1445007                           | 0.669800538                                         | 0.025624439 | 0.120012499      |             |
| PI4KAP2 22                            | 21473000                                            | 21517533    | - 7474           |             |
| transcribed_unitary_pseudogene        | phosphatidylinositol 4-kinase alpha                 |             |                  |             |
| pseudogene 2 [Source:HGNC             | Symbol;Acc:HGNC:33577]                              |             |                  | - 155       |
| 281                                   | 277 159                                             | 128 174     | 1.134157365      |             |
| 1.657628421                           | 1.716837265                                         | 1.028596986 | 0.746303492      |             |
| 1.086781384                           |                                                     |             |                  |             |
| ENSG00000132357                       | 264.9442237                                         | 177.0476679 | 173.0703197      |             |
| 277.2635893                           | 307.0569188                                         | 343.4254318 | 205.0207371      |             |
| 309.2486466                           | -0.595708605                                        | 0.025634208 | 0.12002148       | CARD6       |
| 5                                     | 40841184                                            | 40860175    | + 4399           |             |
| protein_coding                        | caspase recruitment domain family member 6          |             |                  |             |
| [Source:HGNC                          | Symbol;Acc:HGNC:16394]                              |             |                  | - 177       |
| 276                                   | 336 350                                             | 2.846926357 | 1.914314828      |             |
| 1.86389636                            | 3.033586176                                         | 3.328464376 | 3.714155807      |             |
| ENSG00000230177                       | 28.92404189                                         | 23.17377852 | 25.42275882      |             |
| 70.32047554                           | 53.00387289                                         | 53.96685357 | 25.84019308      |             |
| 59.09706733                           | -1.195249736                                        | 0.02568744  | 0.120199454      |             |
| AL080317.1                            | 6                                                   | 111277932   | 111278742        | + 557       |
| antisense                             | novel transcript                                    |             |                  | - 25 25     |
| 26                                    | 70 58                                               | 55          | 2.454593197      | 1.978876866 |
| 2.162323203                           | 6.076367907                                         | 4.537654195 | 4.609496931      |             |
| ENSG00000041988                       | 185.1138681                                         | 385.6116746 | 359.8298171      |             |
| 364.6618946                           | 591.2673407                                         | 494.5326218 | 310.18512        |             |
| 483.4872857                           | -0.638516586                                        | 0.025687945 | 0.120199454      | THAP3       |

|                                                     |                                                        |                |                                |      |                |        |
|-----------------------------------------------------|--------------------------------------------------------|----------------|--------------------------------|------|----------------|--------|
| 1                                                   | 6624866                                                | 6635586        | +                              | 4072 | protein_coding | THAP   |
| domain containing 3                                 | [Source:HGNC Symbol;Acc:HGNC:20855]                    |                |                                |      | THAP           | 160    |
| 416                                                 | 368                                                    | 363            | 647                            | 504  | 2.148854084    |        |
| 4.504219218                                         | 4.186417191                                            |                | 4.310226297                    |      | 6.923968909    |        |
| 5.777883794                                         |                                                        |                |                                |      |                |        |
| ENSG00000214756                                     | 107.5974358                                            |                | 137.1887688                    |      | 126.1359957    |        |
| 161.7370937                                         | 191.9105743                                            |                | 244.3226643                    |      | 123.6407335    |        |
| 199.3234441                                         | -0.687438945                                           |                | 0.025700198                    |      | 0.120219988    | CSKMT  |
| 11                                                  | 62665309                                               |                | 62668496                       | +    | 3185           |        |
| protein_coding                                      | citrate synthase lysine methyltransferase [Source:HGNC |                |                                |      |                |        |
| Symbol;Acc:HGNC:33113]                              | -                                                      |                | 93                             | 148  | 129            | 161    |
| 249                                                 | 1.596865083                                            |                | 2.048737122                    |      | 1.876215543    | 210    |
| 2.444092599                                         | 2.873217188                                            |                | 3.649521666                    |      |                |        |
| ENSG00000101474                                     | 2319.70816                                             |                | 2400.803455                    |      | 2627.344344    |        |
| 2163.86149                                          | 1693.382353                                            |                | 2011.491815                    |      | 2449.28532     |        |
| 1956.245219                                         | 0.324567781                                            |                | 0.025726626                    |      | 0.1203068      | APMAP  |
| 20                                                  | 24962925                                               |                | 24992979                       | -    | 2454           |        |
| protein_coding                                      | adipocyte plasma membrane associated protein           |                |                                |      |                |        |
| [Source:HGNC Symbol;Acc:HGNC:13238]                 | -                                                      |                |                                | 2005 | 2590           | 2687   |
| 2154                                                | 1853                                                   | 2050           | 44.68219827                    |      | 46.53279761    |        |
| 50.72190588                                         | 42.43970506                                            |                | 32.9048154                     |      | 38.99647381    |        |
| ENSG00000173198                                     | 12.72657843                                            |                | 0.926951141                    |      | 6.844588913    | 0      |
| 0                                                   | 0                                                      | 6.832706162    | 0                              |      | 5.260819111    |        |
| 0.025753566                                         | 1                                                      | CYSLTR1 X      | 78271464                       |      | 78327691       |        |
| -                                                   | 5571                                                   | protein_coding | cysteinyl leukotriene receptor |      |                |        |
| 1 [Source:HGNC Symbol;Acc:HGNC:17451]               | -                                                      |                | 11                             | 1    | 7              |        |
| 0                                                   | 0                                                      | 0              | 0.107982714                    |      | 0.007914087    |        |
| 0.058205944                                         | 0                                                      | 0              | 0                              |      |                |        |
| ENSG00000213614                                     | 504.4352906                                            |                | 578.4175119                    |      | 676.636504     |        |
| 422.9274315                                         | 427.6864226                                            |                | 448.4154924                    |      | 586.4964355    |        |
| 433.0097822                                         | 0.438452424                                            |                | 0.02575395                     |      | 0.120373053    | HEXA   |
| 15                                                  | 72340919                                               |                | 72376476                       | -    | 12611          |        |
| protein_coding                                      | hexosaminidase subunit alpha [Source:HGNC              |                |                                |      |                |        |
| Symbol;Acc:HGNC:4878]                               | -                                                      |                | 436                            | 624  | 692            | 421    |
| 457                                                 | 1.890739409                                            |                | 2.181569343                    |      | 2.541903298    | 468    |
| 1.614112447                                         | 1.617167203                                            |                | 1.691658558                    |      |                |        |
| ENSG00000171621                                     | 329.7340776                                            |                | 420.8358179                    |      | 402.8529475    |        |
| 494.2524852                                         | 507.192232                                             |                | 579.898372                     |      | 384.474281     |        |
| 527.1143631                                         | -0.453950307                                           |                | 0.025756542                    |      | 0.120373053    | SPSB1  |
| 1                                                   | 9292880                                                | 9369532        | +                              | 3403 | protein_coding | splA/  |
| ryanodine receptor domain and SOCS box containing 1 | [Source:HGNC                                           |                |                                |      |                |        |
| Symbol;Acc:HGNC:30628]                              | -                                                      |                | 285                            | 454  | 412            | 492    |
| 591                                                 | 4.580128088                                            |                | 5.882038486                    |      | 5.608383756    | 555    |
| 6.99043771                                          | 7.10705427                                             |                | 8.107212706                    |      |                |        |
| ENSG00000075624                                     | 200702.7697                                            |                | 182752.1252                    |      | 195007.2271    |        |
| 154867.7879                                         | 174916.436                                             |                | 155381.3648                    |      | 192820.7074    |        |
| 161721.8629                                         | 0.253740417                                            |                | 0.025778443                    |      | 0.120438589    | ACTB   |
| 7                                                   | 5527147                                                | 5563784        | -                              | 3519 | protein_coding | actin  |
| beta [Source:HGNC Symbol;Acc:HGNC:132]              | -                                                      |                |                                |      | 173474         | 197154 |
| 154162                                              | 191404                                                 | 158356         | 2695.937617                    |      | 2470.132694    | 199435 |

|                                                              |                                             |             |                |                           |                |                |             |      |      |      |      |
|--------------------------------------------------------------|---------------------------------------------|-------------|----------------|---------------------------|----------------|----------------|-------------|------|------|------|------|
| 2625.334021                                                  | 2118.162552                                 | 2370.22918  | 2100.686731    |                           |                |                |             |      |      |      |      |
| ENSG00000267655                                              | 2.313923351                                 | 6.488657986 | 0              | 22.10072088               |                |                |             |      |      |      |      |
|                                                              | 10.05245865                                 | 26.49281903 | 2.934193779    | 19.54866619               |                |                |             |      |      |      |      |
|                                                              | -2.721743105                                | 0.025794931 | 1              | AC125437.1                | 18             |                |             |      |      |      |      |
|                                                              | 79117207                                    | 79117920    | +              | 714                       | sense_intronic |                |             |      |      |      |      |
|                                                              | "novel transcript, sense intronic to ATP9B" |             |                |                           | -              | 2              |             |      |      |      |      |
|                                                              | 7                                           | 0           | 22             | 11                        | 27             | 0.153188617    |             |      |      |      |      |
| 0.43224879                                                   | 0                                           | 1.489792164 | 0.671356304    | 1.765271819               |                |                |             |      |      |      |      |
| ENSG00000099624                                              | 1714.617203                                 | 2372.994921 | 2379.961345    |                           |                |                |             |      |      |      |      |
| 2717.384091                                                  | 2439.092013                                 | 3236.048783 | 2155.857823    |                           |                |                |             |      |      |      |      |
| 2797.508296                                                  | -0.375359541                                | 0.025820735 | 0.120581129    |                           |                |                |             |      |      |      |      |
| ATP5F1D 19                                                   | 1241746                                     | 1244826     | +              | 2250                      | protein_coding | ATP            |             |      |      |      |      |
| synthase F1 subunit delta [Source:HGNC Symbol;Acc:HGNC:837]  |                                             |             |                |                           |                | -              |             |      |      |      |      |
|                                                              | 1482                                        | 2560        | 2434           | 2705                      | 2669           | 3298           | 36.02138426 |      |      |      |      |
|                                                              | 50.16391291                                 | 50.11185871 | 58.12807861    | 51.69215685               |                |                |             |      |      |      |      |
|                                                              | 68.42489963                                 |             |                |                           |                |                |             |      |      |      |      |
| ENSG00000174032                                              | 568.0681828                                 | 596.9565347 | 643.3913578    |                           |                |                |             |      |      |      |      |
| 754.4382447                                                  | 802.3689724                                 | 787.9160621 | 602.8053584    |                           |                |                |             |      |      |      |      |
| 781.5744264                                                  | -0.374392817                                | 0.025824728 | 0.120581129    |                           |                |                |             |      |      |      |      |
| SLC25A30                                                     | 13                                          | 45393316    | 45418455       | -                         | 6794           |                |             |      |      |      |      |
| protein_coding solute carrier family 25 member 30            |                                             |             |                |                           |                |                |             |      |      |      |      |
| [Source:HGNC Symbol;Acc:HGNC:27371]                          |                                             |             |                |                           |                | -              | 491         | 644  | 658  |      |      |
|                                                              | 751                                         | 878         | 803            | 3.952306916               | 4.17921085     |                |             |      |      |      |      |
| 4.48644974                                                   | 5.344604967                                 | 5.63154516  | 5.517419921    |                           |                |                |             |      |      |      |      |
| ENSG00000180999                                              | 0                                           | 0           | 0              | 0                         | 10.05245865    |                |             |      |      |      |      |
| 13.73701727                                                  | 0                                           | 7.929825308 | -5.407863513   | 0.025862452               |                |                |             |      |      |      |      |
|                                                              | 1                                           | C1orf105    | 1              | 172420688                 | 172468831      |                |             |      |      |      |      |
|                                                              | +                                           | 1725        | protein_coding | chromosome 1 open reading |                |                |             |      |      |      |      |
| frame 105 [Source:HGNC Symbol;Acc:HGNC:29591]                |                                             |             |                |                           |                | -              | 0           | 0    |      |      |      |
|                                                              | 0                                           | 0           | 11             | 14                        | 0              | 0              | 0           |      |      |      |      |
|                                                              | 0.277883131                                 | 0.378865424 |                |                           |                |                |             |      |      |      |      |
| ENSG00000155189                                              | 3373.700246                                 | 2846.666954 | 3020.419308    |                           |                |                |             |      |      |      |      |
| 2555.646997                                                  | 2567.946256                                 | 2421.639902 | 3080.262169    |                           |                |                |             |      |      |      |      |
| 2515.077718                                                  | 0.292170137                                 | 0.025873834 | 0.120773528    | AGPAT5                    |                |                |             |      |      |      |      |
|                                                              | 8                                           | 6708357     | 6759666        | +                         | 4684           | protein_coding | 1-          |      |      |      |      |
| acylglycerol-3-phosphate 0-acyltransferase 5 [Source:HGNC    |                                             |             |                |                           |                |                |             |      |      |      |      |
| Symbol;Acc:HGNC:20886]                                       |                                             |             |                |                           |                | -              | 2916        | 3071 | 3089 | 2544 | 2810 |
|                                                              | 2468                                        | 34.0459413  | 28.90659169    | 30.54945576               |                |                |             |      |      |      |      |
| 26.26040605                                                  | 26.14255505                                 | 24.59655618 |                |                           |                |                |             |      |      |      |      |
| ENSG00000263001                                              | 1712.30328                                  | 1612.894985 | 1980.041793    |                           |                |                |             |      |      |      |      |
| 1477.734565                                                  | 1400.033332                                 | 1353.096201 | 1768.413353    |                           |                |                |             |      |      |      |      |
| 1410.288033                                                  | 0.326521452                                 | 0.025884047 | 0.12078432     | GTF2I                     |                |                |             |      |      |      |      |
|                                                              | 7                                           | 74657667    | 74760692       | +                         | 10438          |                |             |      |      |      |      |
| protein_coding general transcription factor Iii [Source:HGNC |                                             |             |                |                           |                |                |             |      |      |      |      |
| Symbol;Acc:HGNC:4659]                                        |                                             |             |                |                           |                | GTF2I          | 1480        | 1740 | 2025 | 1471 | 1532 |
|                                                              | 1379                                        | 7.75423816  | 7.349637406    | 8.986905828               |                |                |             |      |      |      |      |
| 6.813913196                                                  | 6.395876519                                 | 6.167270674 |                |                           |                |                |             |      |      |      |      |
| ENSG0000008441                                               | 2440.032174                                 | 2352.601995 | 3808.524831    |                           |                |                |             |      |      |      |      |
| 2231.168231                                                  | 1756.438684                                 | 2401.034376 | 2867.053       |                           |                |                |             |      |      |      |      |
| 2129.547097                                                  | 0.429240457                                 | 0.025934407 | 0.120982384    | NFIX                      |                |                |             |      |      |      |      |



|                        |                                                  |             |   |             |                       |
|------------------------|--------------------------------------------------|-------------|---|-------------|-----------------------|
| 19                     | 12995608                                         | 13098796    | + | 6302        |                       |
| protein_coding         | nuclear factor I X [Source:HGNC                  |             |   |             | Symbol;Acc:HGNC:7788] |
| CTF/NFI                | 2109 2538                                        | 3895 2221   |   | 1922 2447   |                       |
| 18.30176159            | 17.75608343                                      | 28.63067051 |   | 17.04007007 |                       |
| 13.29026321            | 18.12598459                                      |             |   |             |                       |
| ENSG00000132563        | 166.6024813                                      | 348.533629  |   | 291.383928  |                       |
| 351.6023777            | 411.2369448                                      | 481.7768201 |   | 268.8400128 |                       |
| 414.8720475            | -0.623396277                                     | 0.026010326 |   | 0.121299528 | REEP2                 |
| 5                      | 138439017                                        | 138446969   | + | 3284        |                       |
| protein_coding         | receptor accessory protein 2 [Source:HGNC        |             |   |             |                       |
| Symbol;Acc:HGNC:17975] | -                                                | 144 376     |   | 298 350     | 450                   |
| 491                    | 2.398026932                                      | 5.047991959 |   | 4.203543746 |                       |
| 5.153070835            | 5.971287244                                      | 6.979501092 |   |             |                       |
| ENSG00000132326        | 497.4935206                                      | 650.7197009 |   | 677.6143024 |                       |
| 857.9098016            | 746.6235198                                      | 831.089545  |   | 608.6091746 |                       |
| 811.8742888            | -0.414451454                                     | 0.026056933 |   | 0.12147982  | PER2                  |
| 2                      | 238244038                                        | 238290102   | - | 6877        |                       |
| protein_coding         | period circadian regulator 2 [Source:HGNC        |             |   |             |                       |
| Symbol;Acc:HGNC:8846]  | -                                                | 430 702     |   | 693 854     | 817                   |
| 847                    | 3.419512093                                      | 4.500616891 |   | 4.668062543 |                       |
| 6.004267919            | 5.177041304                                      | 5.749504548 |   |             |                       |
| ENSG00000105220        | 6727.732144                                      | 7570.409967 |   | 8508.801817 |                       |
| 4680.329936            | 5798.440922                                      | 7247.257827 |   | 7602.314643 |                       |
| 5908.676228            | 0.363655425                                      | 0.026098047 |   | 0.121630336 | GPI                   |
| 19                     | 34359480                                         | 34402413    | + | 10680       |                       |
| protein_coding         | glucose-6-phosphate isomerase [Source:HGNC       |             |   |             |                       |
| Symbol;Acc:HGNC:4458]  | -                                                | 5815 8167   |   | 8702 4659   | 6345                  |
| 7386                   | 29.77646782                                      | 33.71516278 |   | 37.74420498 |                       |
| 21.09223854            | 25.88922032                                      | 32.28375824 |   |             |                       |
| ENSG00000214226        | 82.14427898                                      | 101.9646255 |   | 86.04626062 |                       |
| 190.8698622            | 123.3710835                                      | 146.2011124 |   | 90.0517217  |                       |
| 153.480686             | -0.767165209                                     | 0.026105131 |   | 0.121630336 |                       |
| C17orf67               | 17 56791913                                      | 56838773    | - |             | 2410                  |
| protein_coding         | chromosome 17 open reading frame 67              |             |   |             |                       |
| [Source:HGNC           | Symbol;Acc:HGNC:27900]                           | -           |   | 71 110      | 88                    |
| 190                    | 135 149                                          | 1.61115016  |   | 2.012378184 |                       |
| 1.691484745            | 3.811867313                                      | 2.441042404 |   | 2.88612583  |                       |
| ENSG00000117054        | 1427.690708                                      | 1515.565115 |   | 1345.450621 |                       |
| 1045.765929            | 1031.747802                                      | 1288.335977 |   | 1429.568815 |                       |
| 1121.949903            | 0.349726487                                      | 0.026138148 |   | 0.121747064 | ACADM                 |
| 1                      | 75724347                                         | 75787575    | + | 4783        |                       |
| protein_coding         | acyl-CoA dehydrogenase medium chain [Source:HGNC |             |   |             |                       |
| Symbol;Acc:HGNC:89]    | -                                                | 1234 1635   |   | 1376 1041   | 1129                  |
| 1313                   | 14.10943072                                      | 15.07132149 |   | 13.32663518 |                       |
| 10.52329064            | 10.28613355                                      | 12.81475717 |   |             |                       |
| ENSG00000137221        | 798.3035562                                      | 1027.988815 |   | 934.7752859 |                       |
| 1159.283268            | 1032.661661                                      | 1467.898417 |   | 920.3558858 |                       |
| 1219.947782            | -0.405763001                                     | 0.026174022 |   | 0.121877027 | TJAP1                 |
| 6                      | 43477523                                         | 43506556    | + | 6741        |                       |
| protein_coding         | tight junction associated protein 1 [Source:HGNC |             |   |             |                       |

|                                                 |                                                        |                |                          |                |             |        |
|-------------------------------------------------|--------------------------------------------------------|----------------|--------------------------|----------------|-------------|--------|
| Symbol;Acc:HGNC:17949]                          | -                                                      | 690            | 1109                     | 956            | 1154        | 1130   |
| 1496                                            | 5.597827049                                            | 7.253392468    |                          | 6.56955603     |             |        |
| 8.277185688                                     | 7.304873744                                            | 10.35984606    |                          |                |             |        |
| ENSG00000170037                                 | 592.364378                                             | 719.3140853    |                          | 896.6411476    |             |        |
| 487.2204377                                     | 523.6417098                                            | 601.4851134    |                          | 736.106537     |             |        |
| 537.449087                                      | 0.454508099                                            | 0.026190599    |                          | 0.121917078    |             | CNTR0B |
| 17                                              | 7932101 7949918 +                                      | 6234           |                          |                |             |        |
| protein_coding                                  | "centrobin, centriole duplication and spindle assembly |                |                          |                |             |        |
| protein [Source:HGNC Symbol;Acc:HGNC:29616]"    | -                                                      | 512            | 776                      |                |             |        |
| 917                                             | 485                                                    | 573            | 613                      | 4.491566932    | 5.488186754 |        |
| 6.81404494                                      | 3.761630708                                            | 4.005404872    | 4.590285652              |                |             |        |
| ENSG00000147606                                 | 2.313923351                                            | 7.415609127    | 9.777984162              | 0              |             |        |
| 0                                               | 0                                                      | 6.502505547    | 0                        | 5.196880162    |             |        |
| 0.026216212                                     | 1                                                      | SLC26A7 8      | 91209494                 | 91398152       |             |        |
| +                                               | 6273                                                   | protein_coding | solute carrier family 26 |                |             |        |
| member 7 [Source:HGNC Symbol;Acc:HGNC:14467]    | -                                                      | 2              | 8                        |                |             |        |
| 10                                              | 0                                                      | 0              | 0                        | 0.017436103    | 0.056227485 |        |
| 0.073846033                                     | 0                                                      | 0              | 0                        |                |             |        |
| ENSG00000089692                                 | 63.63289216                                            | 18.53902282    | 31.28954932              |                |             |        |
| 19.08698622                                     | 0                                                      | 4.906077597    | 37.8204881               | 7.997687939    |             |        |
| 2.246497597                                     | 0.026246543                                            | 0.122061469    | LAG3                     | 12             |             |        |
| 6772512 6778455 +                               | 3056                                                   | protein_coding | lymphocyte               |                |             |        |
| activating 3 [Source:HGNC Symbol;Acc:HGNC:6476] | -                                                      | 55             | 20                       |                |             |        |
| 32                                              | 19                                                     | 0              | 5                        | 0.984246893    | 0.28854304  |        |
| 0.485064045                                     | 0.300608646                                            | 0              | 0.076377017              |                |             |        |
| ENSG00000240583                                 | 304.2809207                                            | 181.6824236    | 296.2729201              |                |             |        |
| 165.7554066                                     | 37.46825497                                            | 30.4176811     | 260.7454215              |                |             |        |
| 77.88044757                                     | 1.743960865                                            | 0.026249262    | 0.122061469              |                |             | AQP1   |
| 7                                               | 30911694                                               | 30925516       | +                        | 3435           |             |        |
| protein_coding                                  | aquaporin 1 (Colton blood group) [Source:HGNC          |                |                          |                |             |        |
| Symbol;Acc:HGNC:633]                            | -                                                      | 263            | 196                      | 303            | 165         | 41     |
| 31                                              | 4.18720014                                             | 2.515725709    | 4.086187989              |                |             |        |
| 2.322514421                                     | 0.520134562                                            | 0.421289843    |                          |                |             |        |
| ENSG00000165895                                 | 527.5745241                                            | 463.4755704    | 455.6540619              |                |             |        |
| 359.6390035                                     | 344.5251738                                            | 361.0873112    | 482.2347188              |                |             |        |
| 355.0838295                                     | 0.441019094                                            | 0.026252419    | 0.122061469              |                |             |        |
| ARHGAP42                                        | 11                                                     | 100687653      | 100993941                | +              | 8948        |        |
| protein_coding                                  | Rho GTPase activating protein 42 [Source:HGNC          |                |                          |                |             |        |
| Symbol;Acc:HGNC:26545]                          | -                                                      | 456            | 500                      | 466            | 358         | 377    |
| 368                                             | 2.786978254                                            | 2.463644199    | 2.412472642              |                |             |        |
| 1.93445338                                      | 1.836005477                                            | 1.919852568    |                          |                |             |        |
| ENSG00000070423                                 | 1184.728756                                            | 1852.048379    | 1784.482109              |                |             |        |
| 2082.490654                                     | 2041.562966                                            | 2197.922764    | 1607.086415              |                |             |        |
| 2107.325461                                     | -0.390213121                                           | 0.026257187    | 0.122061469              |                |             | RNF126 |
| 19                                              | 647526 663277                                          | -              | 3496                     | protein_coding | ring        |        |
| finger protein 126 [Source:HGNC                 | Symbol;Acc:HGNC:21151]                                 |                |                          |                |             |        |
| 1998                                            | 1825                                                   | 2073           | 2234                     | 2240           | 16.01855163 | 1024   |
| 25.19753272                                     | 24.18209376                                            | 28.67009253    | 27.84648241              |                |             |        |
| 29.91042818                                     |                                                        |                |                          |                |             |        |
| ENSG00000128340                                 | 1469.341328                                            | 2007.776171    | 1879.328556              |                |             |        |

|                                                     |                                                 |             |                |                      |
|-----------------------------------------------------|-------------------------------------------------|-------------|----------------|----------------------|
| 1817.282004                                         | 2374.207962                                     | 2964.252084 | 1785.482018    |                      |
| 2385.24735                                          | -0.417466131                                    | 0.026261541 | 0.122061469    | RAC2                 |
| 22                                                  | 37225261                                        | 37244448    | -              | 2532                 |
| protein_coding                                      | Rac family small GTPase 2 [Source:HGNC          |             |                |                      |
| Symbol;Acc:HGNC:9802]                               | -                                               | 1270        | 2166           | 1922 1809 2598       |
| 3021                                                | 27.43056369                                     | 37.71626764 | 35.16350338    |                      |
| 34.54427497                                         | 44.71302404                                     | 55.69716112 |                |                      |
| ENSG0000061918                                      | 343.6176177                                     | 264.1810751 | 333.4292599    |                      |
| 238.0850386                                         | 226.6372496                                     | 165.8254228 | 313.7426509    |                      |
| 210.1825703                                         | 0.577033815                                     | 0.026281359 | 0.122116455    |                      |
| GUCY1B1 4                                           | 155758992                                       | 155807591   | +              | 3724                 |
| protein_coding                                      | guanylate cyclase 1 soluble subunit beta 1      |             |                |                      |
| [Source:HGNC Symbol;Acc:HGNC:4687]                  | -                                               | 297         | 285            | 341                  |
| 237                                                 | 248                                             | 169         | 4.36155637     | 3.374186983          |
| 4.241770452                                         | 3.077087813                                     | 2.90202137  | 2.118473658    |                      |
| ENSG00000232085                                     | 13.88354011                                     | 5.561706845 | 0.977798416    | 0                    |
| 0                                                   | 0                                               | 6.80768179  | 0              | 5.255618479          |
| 0.026316304                                         | 1                                               | AL606534.2  | 1              | 243164638            |
| 243169445                                           | +                                               | 488         | antisense      | "novel transcript,   |
| antisense to CEP170"                                | -                                               | 12          | 6              | 1 0 0                |
| 0                                                   | 1.344795158                                     | 0.542082499 | 0.094925443    | 0                    |
| 0                                                   | 0                                               |             |                |                      |
| ENSG0000008056                                      | 15.04050178                                     | 0           | 5.866790497    | 31.14192488          |
| 36.5543951                                          | 27.47403455                                     | 6.969097427 | 31.72345151    |                      |
| -2.210175688                                        | 0.026336378                                     | 0.122280435 | SYN1           | X                    |
| 47571898                                            | 47619943                                        | -           | 3822           | protein_coding       |
| synapsin I [Source:HGNC Symbol;Acc:HGNC:11494]      | -                                               |             |                | 13                   |
| 0                                                   | 6                                               | 31          | 40             | 28                   |
| 0.072721533                                         | 0.392168067                                     | 0.45606622  | 0.18601475     | 0                    |
| ENSG00000154529                                     | 1.156961676                                     | 3.707804563 | 15.64477466    | 0                    |
| 0                                                   | 0                                               | 6.836513633 | 0              | 5.268957435          |
| 0.026336909                                         | 1                                               | CNTNAP3B    | 9              | 41890314             |
| 42129510                                            | -                                               | 13220       | protein_coding | contactin associated |
| protein like 3B [Source:HGNC Symbol;Acc:HGNC:32035] | -                                               |             |                | 1                    |
| 4                                                   | 16                                              | 0           | 0              | 0.004136788          |
| 0.013340205                                         | 0.056064891                                     | 0           | 0              | 0                    |
| ENSG00000131381                                     | 1439.260325                                     | 1301.439402 | 1333.71704     |                      |
| 1719.837916                                         | 1962.971017                                     | 1486.541512 | 1358.138922    |                      |
| 1723.116815                                         | -0.343803848                                    | 0.026338624 | 0.122280435    | RBSN                 |
| 3                                                   | 15070073                                        | 15099163    | -              | 7921                 |
| protein_coding                                      | "rabenosyn, RAB effector [Source:HGNC           |             |                |                      |
| Symbol;Acc:HGNC:20759]"                             | -                                               | 1244        | 1404           | 1364 1712 2148       |
| 1515                                                | 8.588851221                                     | 7.814857305 | 7.976948952    |                      |
| 10.45020869                                         | 11.81715308                                     | 8.928503134 |                |                      |
| ENSG00000058063                                     | 2220.209456                                     | 1743.595096 | 1849.994603    |                      |
| 1426.501075                                         | 1646.775499                                     | 1529.714995 | 1937.933052    |                      |
| 1534.330523                                         | 0.336315461                                     | 0.026340685 | 0.122280435    | ATP11B               |
| 3                                                   | 182793500                                       | 182921635   | +              | 9196                 |
| protein_coding                                      | ATPase phospholipid transporting 11B (putative) |             |                |                      |
| [Source:HGNC Symbol;Acc:HGNC:13553]                 | -                                               | 1919        | 1881           | 1892                 |

|                                     |                                                        |              |                      |             |                              |             |       |
|-------------------------------------|--------------------------------------------------------|--------------|----------------------|-------------|------------------------------|-------------|-------|
|                                     | 1420                                                   | 1802         | 1559                 | 11.4122355  | 9.018281573                  |             |       |
| 9.530696179                         |                                                        | 7.466044915  |                      | 8.53914566  | 7.913947929                  |             |       |
| ENSG00000067369                     |                                                        | 1668.338736  |                      | 1477.560119 | 1604.567201                  |             |       |
| 1402.391198                         |                                                        | 1014.384464  |                      | 1277.542606 | 1583.488685                  |             |       |
| 1231.439423                         |                                                        | 0.36286098   |                      | 0.026348646 | 0.122280435                  |             |       |
| TP53BP1                             | 15                                                     | 43403061     |                      | 43510728    | -                            | 12991       |       |
| protein_coding                      | tumor protein p53 binding protein 1 [Source:HGNC       |              |                      |             |                              |             |       |
| Symbol;Acc:HGNC:11999]              | -                                                      |              | 1442                 | 1594        | 1641                         | 1396        | 1110  |
|                                     | 1302                                                   | 6.070401134  |                      | 5.4097811   | 5.851516771                  |             |       |
| 5.195699821                         |                                                        | 3.723393993  |                      | 4.678584065 |                              |             |       |
| ENSG00000260651                     | 0                                                      | 8.342560268  |                      | 14.66697624 | 0                            | 0           |       |
|                                     | 0                                                      | 7.669845503  |                      | 0           | 5.435470036                  | 0.026424142 |       |
|                                     | 1                                                      | AF213884.3   |                      | 4           | 102500841                    | 102501319   |       |
|                                     | -                                                      | 479          | antisense            |             | "novel transcript, antisense |             |       |
| NFKB1"                              | -                                                      | 0            | 9                    | 15          | 0                            | 0           | 0     |
|                                     | 0.828401648                                            | 1.450635166  |                      | 0           | 0                            | 0           |       |
| ENSG00000141867                     |                                                        | 3625.917892  |                      | 4108.247456 | 4884.103089                  |             |       |
| 6121.899685                         |                                                        | 4902.858242  |                      | 4908.040028 | 4206.089479                  |             |       |
| 5310.932652                         |                                                        | -0.336275933 |                      | 0.026488798 | 0.122893552                  |             | BRD4  |
|                                     | 19                                                     | 15235519     |                      | 15332545    | -                            | 12093       |       |
| protein_coding                      | bromodomain containing 4 [Source:HGNC                  |              |                      |             |                              |             |       |
| Symbol;Acc:HGNC:13575]              | -                                                      |              | 3134                 | 4432        | 4995                         | 6094        | 5365  |
|                                     | 5002                                                   | 14.17293032  |                      | 16.15844844 | 19.13391743                  |             |       |
| 24.3651794                          |                                                        | 19.33277832  |                      | 19.30881717 |                              |             |       |
| ENSG00000100324                     |                                                        | 833.0124065  |                      | 810.1552971 | 936.7308827                  |             |       |
| 1279.832655                         |                                                        | 949.5004126  |                      | 1131.341494 | 859.9661954                  |             |       |
| 1120.224854                         |                                                        | -0.381091369 |                      | 0.026496983 | 0.12289423                   |             | TAB1  |
|                                     | 22                                                     | 39399741     |                      | 39437060    | +                            | 4456        |       |
| protein_coding                      | TGF-beta activated kinase 1 (MAP3K7) binding protein 1 |              |                      |             |                              |             |       |
| [Source:HGNC Symbol;Acc:HGNC:18157] | -                                                      |              |                      |             | 720                          | 874         | 958   |
|                                     | 1274                                                   | 1039         | 1153                 | 8.83653551  | 8.647691905                  |             |       |
| 9.959161676                         |                                                        | 13.82373699  |                      | 10.1608248  | 12.07897718                  |             |       |
| ENSG00000270270                     | 0                                                      | 0            |                      | 0           | 9.041203998                  | 14.62175804 |       |
|                                     | 0                                                      | 0            | 7.887654012          |             | -5.400402153                 | 0.026543581 |       |
|                                     | 1                                                      | BNIP3P10     |                      | 19          | 19870723                     | 19871299    |       |
|                                     | -                                                      | 577          | processed_pseudogene |             | BCL2 interacting             |             |       |
| protein                             | 3 pseudogene 10 [Source:HGNC Symbol;Acc:HGNC:49690]    |              |                      |             |                              |             |       |
|                                     | 0                                                      | 0            | 0                    | 9           | 16                           | 0           | 0     |
|                                     | 0                                                      | 0.754167673  |                      | 1.208377882 | 0                            |             |       |
| ENSG00000146083                     |                                                        | 703.4326988  |                      | 1074.336372 | 948.4644637                  |             |       |
| 1146.223751                         |                                                        | 1185.276261  |                      | 1279.505037 | 908.7445116                  |             |       |
| 1203.66835                          |                                                        | -0.404405689 |                      | 0.026595682 | 0.123314587                  |             | RNF44 |
|                                     | 5                                                      | 176526697    |                      | 176538025   | -                            | 5660        |       |
| protein_coding                      | ring finger protein 44 [Source:HGNC                    |              |                      |             |                              |             |       |
| Symbol;Acc:HGNC:19180]              | -                                                      |              | 608                  | 1159        | 970                          | 1141        | 1297  |
|                                     | 1304                                                   | 5.874648154  |                      | 9.028195663 | 7.938852972                  |             |       |
| 9.746987963                         |                                                        | 9.985783424  |                      | 10.75492029 |                              |             |       |
| ENSG00000267264                     |                                                        | 3.470885027  |                      | 12.05036483 | 3.911193665                  |             | 0     |
|                                     | 0                                                      | 0            | 6.477481174          |             | 0                            | 5.19143249  |       |
| 0.02660748                          |                                                        | 1            | AC006504.3           |             | 19                           | 27803538    |       |

|                                     |                                                     |              |                          |             |             |
|-------------------------------------|-----------------------------------------------------|--------------|--------------------------|-------------|-------------|
| 27804060                            | +                                                   | 523          | processed_pseudogene     | vomeronasal |             |
| receptor_pseudogene                 | -                                                   |              | 3                        | 13          | 4           |
| 0                                   | 0.313699827                                         |              | 1.095911846              | 0.354291521 | 0           |
| 0                                   | 0                                                   |              |                          |             |             |
| ENSG00000234840                     | 118.0100909                                         |              | 169.6320588              | 106.5800274 |             |
| 93.42577465                         | 66.71177105                                         |              | 56.91050013              | 131.4073924 |             |
| 72.34934861                         | 0.862845343                                         |              | 0.026634221              | 0.123455832 |             |
| LINC01239                           | 9                                                   | 22646200     | 22824213                 | +           | 2568        |
| lincRNA                             | long intergenic non-protein coding RNA              | 1239         |                          |             |             |
| [Source:HGNC Symbol;Acc:HGNC:49796] | -                                                   |              | 102                      | 183         | 109         |
| 93                                  | 73                                                  | 58           | 2.172200279              | 3.141883144 |             |
| 1.966228263                         | 1.751012094                                         |              | 1.238757904              | 1.054335938 |             |
| ENSG00000162419                     | 609.7188031                                         |              | 556.1706845              | 539.7447257 |             |
| 826.7678767                         | 905.6351385                                         |              | 590.6917427              | 568.5447378 |             |
| 774.3649193                         | -0.446353411                                        |              | 0.026662755              | 0.12355063  | GMEB1       |
| 1                                   | 28668732                                            |              | 28719353                 | +           | 6459        |
| protein_coding                      | glucocorticoid modulatory element binding protein 1 |              |                          |             |             |
| [Source:HGNC Symbol;Acc:HGNC:4370]  | SAND                                                |              | 527                      | 600         | 552         |
| 823                                 | 991                                                 | 602          | 4.462107648              | 4.095622534 |             |
| 3.958915653                         | 6.160780945                                         |              | 6.686009167              | 4.350881375 |             |
| ENSG00000106400                     | 1757.424785                                         |              | 1518.345969              | 1508.742956 |             |
| 1868.515493                         | 1958.401717                                         |              | 2126.294031              | 1594.837903 |             |
| 1984.403747                         | -0.31572743                                         |              | 0.026676663              | 0.123577622 | ZNHIT1      |
| 7                                   | 101217668                                           |              | 101224190                | +           | 5510        |
| protein_coding                      | zinc finger HIT-type containing 1                   | [Source:HGNC |                          |             |             |
| Symbol;Acc:HGNC:21688]              | -                                                   |              | 1519                     | 1638        | 1543        |
| 2167                                | 15.07651235                                         |              | 13.10678745              | 12.97229401 | 1860        |
| 16.32159367                         | 16.94841813                                         |              | 18.35918289              |             | 2143        |
| ENSG00000270177                     | 5.784808379                                         |              | 8.342560268              | 4.888992081 | 0           |
| 0                                   | 0                                                   | 6.338786909  | 0                        | 5.15791598  |             |
| 0.026707839                         | 1                                                   | AC104109.2   | 5                        | 134226410   |             |
| 134227827                           | +                                                   | 1418         | lincRNA novel transcript |             | -           |
| 5                                   | 9                                                   | 5            | 0                        | 0           | 0           |
| 0.279833843                         | 0.163341383                                         |              | 0                        | 0           | 0.192836165 |
| ENSG00000260231                     | 18.51138681                                         |              | 23.17377852              | 19.55596832 |             |
| 65.29758443                         | 30.15737595                                         |              | 60.83536221              | 20.41371122 |             |
| 52.0967742                          | -1.348441177                                        |              | 0.026721824              | 0.123749326 | KDM7A-      |
| DT                                  | 7                                                   | 140177184    | 140179640                | +           | 2457        |
| bidirectional_promoter_lncRNA       | KDM7A divergent transcript                          |              |                          |             |             |
| [Source:HGNC Symbol;Acc:HGNC:48959] | -                                                   |              | 16                       | 25          | 20          |
| 65                                  | 33                                                  | 62           | 0.356130803              | 0.448609855 |             |
| 0.377074614                         | 1.279114484                                         |              | 0.585284983              | 1.177965494 |             |
| ENSG00000185989                     | 2806.789025                                         |              | 3475.139827              | 3413.494271 |             |
| 3892.74061                          | 4027.38048                                          |              | 3979.810147              | 3231.807708 |             |
| 3966.643746                         | -0.295274605                                        |              | 0.026730361              | 0.123751373 | RASA3       |
| 13                                  | 113977783                                           |              | 114132611                | -           | 4763        |
| protein_coding                      | RAS p21 protein activator 3                         | [Source:HGNC |                          |             |             |
| Symbol;Acc:HGNC:20331]              | -                                                   |              | 2426                     | 3749        | 3491        |
| 4056                                | 27.8551132                                          |              | 34.70314356              | 33.95249728 | 3875        |
| 39.33619442                         | 40.32005044                                         |              | 39.75240429              |             | 4407        |

|                        |                                             |                |                               |             |
|------------------------|---------------------------------------------|----------------|-------------------------------|-------------|
| ENSG00000239305        | 319.3214225                                 | 322.578997     | 308.0065011                   |             |
| 329.5016568            | 561.1099647                                 | 481.7768201    | 316.6356402                   |             |
| 457.4628139            | -0.531410592                                | 0.026754335    | 0.123824864                   | RNF103      |
| 2                      | 86603393                                    | 86623866       | - 7599                        |             |
| protein_coding         | ring finger protein 103                     | [Source:HGNC   |                               |             |
| Symbol;Acc:HGNC:12859] | -                                           | 276 348        | 315 328                       | 614         |
| 491                    | 1.986311469                                 | 2.019095019    | 1.920244656                   |             |
| 2.086981579            | 3.521036478                                 | 3.016276034    |                               |             |
| ENSG00000239900        | 298.4961123                                 | 262.3271729    | 271.8279597                   |             |
| 161.7370937            | 187.3412749                                 | 213.9049832    | 277.550415                    |             |
| 187.6611173            | 0.563840744                                 | 0.026817483    | 0.12406076                    | ADSL        |
| 22                     | 40346500                                    | 40390463       | + 7111                        |             |
| protein_coding         | adenylosuccinate lyase                      | [Source:HGNC   |                               |             |
| Symbol;Acc:HGNC:291]   | -                                           | 258 283        | 278 161                       | 205         |
| 218                    | 1.984192209                                 | 1.754646825    | 1.810992172                   |             |
| 1.094703266            | 1.256266504                                 | 1.431106159    |                               |             |
| ENSG00000081853        | 15.04050178                                 | 7.415609127    | 2.933395248                   |             |
| 45.20601999            | 38.38211485                                 | 13.73701727    | 8.46316872                    |             |
| 32.44171737            | -1.952276325                                | 0.026821535    | 0.12406076                    |             |
| PCDHGA2 5              | 141338760                                   | 141512979      | + 6724                        |             |
| protein_coding         | "protocadherin gamma subfamily A, 2         | [Source:HGNC   |                               |             |
| Symbol;Acc:HGNC:8700]" | -                                           | 13 8           | 3 45                          | 42          |
| 14                     | 0.105732953                                 | 0.052456129    | 0.020667884                   |             |
| 0.323583245            | 0.272195025                                 | 0.097195547    |                               |             |
| ENSG00000185933        | 3.470885027                                 | 1.853902282    | 14.66697624                   | 0           |
| 0                      | 0                                           | 6.663921184    | 0                             | 5.230400651 |
| 0.026841395            | 1                                           | CALHM1 10      | 103453387                     | 103458888   |
| -                      | 3053                                        | protein_coding | calcium homeostasis modulator |             |
| 1 [Source:HGNC         | Symbol;Acc:HGNC:23494]                      | -              | 3 2                           | 15          |
| 0                      | 0                                           | 0              | 0.053738948                   | 0.028882657 |
| 0.227597198            | 0                                           | 0              | 0                             |             |
| ENSG00000017483        | 17.35442514                                 | 28.73548537    | 6.844588913                   |             |
| 53.24264577            | 63.05633154                                 | 34.34254318    | 17.64483314                   |             |
| 50.21384016            | -1.506584865                                | 0.026850207    | 0.124109932                   |             |
| SLC38A5 X              | 48458537                                    | 48470256       | - 4014                        |             |
| protein_coding         | solute carrier family 38 member 5           | [Source:HGNC   |                               |             |
| Symbol;Acc:HGNC:18070] | -                                           | 15 31          | 7 53                          | 69          |
| 35                     | 0.204365981                                 | 0.340500915    | 0.080783586                   |             |
| 0.638410054            | 0.749083654                                 | 0.407039646    |                               |             |
| ENSG00000197603        | 712.6883922                                 | 574.7097073    | 711.837247                    |             |
| 500.2799546            | 406.6676454                                 | 561.2552771    | 666.4117822                   |             |
| 489.4009591            | 0.445311358                                 | 0.026853132    | 0.124109932                   |             |
| CPLANE1 5              | 37106228                                    | 37249428       | - 15146                       |             |
| protein_coding         | ciliogenesis and planar polarity effector 1 | [Source:HGNC   |                               |             |
| Symbol;Acc:HGNC:25801] | -                                           | 616 620        |                               | 728         |
| 498                    | 445 572                                     | 2.224218622    | 1.804794235                   |             |
| 2.226567587            | 1.589763812                                 | 1.280326269    | 1.762966712                   |             |
| ENSG00000147894        | 421.13405                                   | 492.2110558    | 349.0740346                   |             |
| 543.4768181            | 722.863163                                  | 506.307208     | 420.8063801                   |             |
| 590.8823964            | -0.4898353                                  | 0.026856522    | 0.124109932                   |             |

|                                   |   |                                                     |                        |             |              |                 |
|-----------------------------------|---|-----------------------------------------------------|------------------------|-------------|--------------|-----------------|
| C9orf72                           | 9 | 27546545                                            | 27573866               | -           | 6332         |                 |
| protein_coding                    |   | chromosome 9                                        | open reading frame     | 72          | [Source:HGNC |                 |
| Symbol;Acc:HGNC:28337]            |   | -                                                   | 364                    | 531         | 357          | 541 791         |
|                                   |   | 516                                                 | 3.143802031            | 3.697324536 | 2.611738949  |                 |
| 4.131022643                       |   | 5.443699895                                         | 3.804125458            |             |              |                 |
| ENSG00000225234                   | 0 | 3.707804563                                         | 0.977798416            |             | 56.25638043  |                 |
|                                   |   | 3.65543951                                          | 0                      | 1.56186766  |              |                 |
| 19.97060665                       |   | -3.642401386                                        | 0.026899599            | 1           | TRAPPC12-AS1 |                 |
|                                   |   | 2                                                   | 3481242 3482409        | -           | 908          | antisense       |
| TRAPPC12 antisense RNA 1          |   | [Source:HGNC                                        | Symbol;Acc:HGNC:41046] |             | -            |                 |
|                                   |   | 0                                                   | 4                      | 1           | 56           | 4 0 0           |
| 0.194226329                       |   | 0.051017199                                         | 2.981970859            | 0.191969724 | 0            |                 |
| ENSG00000169826                   |   | 1336.290735                                         | 1303.293304            | 1070.689266 |              |                 |
| 1597.279373                       |   | 1784.768341                                         | 1382.532667            | 1236.757768 |              |                 |
| 1588.19346                        |   | -0.361187929                                        | 0.026914549            | 0.124340497 |              |                 |
| CSGALNACT2                        |   | 10                                                  | 43138486               | 43185308    | +            | 3730            |
| protein_coding                    |   | chondroitin sulfate N-                              |                        |             |              |                 |
| acetylgalactosaminyltransferase 2 |   | [Source:HGNC                                        | Symbol;Acc:HGNC:24292] |             |              |                 |
|                                   |   | -                                                   | 1155                   | 1406        | 1095         | 1590 1953 1409  |
| 16.93432402                       |   | 16.61921273                                         | 13.59902409            | 20.61054657 |              |                 |
| 22.81665676                       |   | 17.63389283                                         |                        |             |              |                 |
| ENSG00000154217                   |   | 56.69112211                                         | 70.4482867             | 66.4902923  |              |                 |
| 121.5539649                       |   | 106.9216057                                         | 115.7834313            | 64.5432337  |              |                 |
| 114.7530006                       |   | -0.828072419                                        | 0.026969164            | 0.124529489 |              |                 |
| PITPNC1                           |   | 17                                                  | 67377281               | 67697261    | +            | 7819            |
| protein_coding                    |   | phosphatidylinositol transfer protein cytoplasmic 1 |                        |             |              |                 |
| [Source:HGNC                      |   | Symbol;Acc:HGNC:21045]                              |                        | -           | 49           | 76 68           |
|                                   |   | 121                                                 | 117                    | 118         | 0.342720103  | 0.428544906     |
| 0.402865572                       |   | 0.748230442                                         | 0.652068538            | 0.70449324  |              |                 |
| ENSG00000137075                   |   | 695.3339671                                         | 583.9792187            | 754.8603773 |              |                 |
| 517.3577843                       |   | 523.6417098                                         | 488.6453287            | 678.0578544 |              |                 |
| 509.8816076                       |   | 0.410855071                                         | 0.026978504            | 0.124529489 |              | RNF38           |
|                                   |   | 9                                                   | 36336396               | 36487548    | -            | 6138            |
| protein_coding                    |   | ring finger protein 38                              |                        |             |              |                 |
| [Source:HGNC                      |   | Symbol;Acc:HGNC:18052]                              |                        | -           | 601          | 630 772 515 573 |
|                                   |   | 498                                                 | 5.354788236            | 4.525302581 | 5.82630039   |                 |
| 4.056780981                       |   | 4.068050501                                         | 3.787463834            |             |              |                 |
| ENSG00000280355                   |   | 38.1797353                                          | 40.7858502             | 41.06753348 |              |                 |
| 98.44866576                       |   | 76.7642297                                          | 66.72265532            | 40.01103966 |              |                 |
| 80.6451836                        |   | -1.01014763                                         | 0.026979896            | 0.124529489 |              |                 |
| AL132656.4                        |   | 10                                                  | 79681973               | 79684094    | -            | 2122            |
| TEC                               |   | novel transcript                                    |                        | -           | 33           | 44 42           |
|                                   |   | 98                                                  | 84                     | 68          | 0.850478371  | 0.91420008      |
| 0.916867052                       |   | 2.232964983                                         | 1.725013524            | 1.495924135 |              |                 |
| ENSG00000165507                   |   | 325.1062309                                         | 114.9419415            | 67.46809072 |              |                 |
| 107.4898698                       |   | 68.53949081                                         | 59.85414669            | 169.1720877 |              |                 |
| 78.62783575                       |   | 1.103025749                                         | 0.026992958            | 0.124552173 |              | DEPP1           |
|                                   |   | 10                                                  | 44970981               | 44978810    | -            | 2979            |
| protein_coding                    |   | "DEPP1, autophagy regulator                         |                        |             |              |                 |
| [Source:HGNC                      |   | Symbol;Acc:HGNC:23355]"                             |                        | -           | 281          | 124 69 107 75   |

|                                      |                                                       |                                    |                                 |             |          |
|--------------------------------------|-------------------------------------------------------|------------------------------------|---------------------------------|-------------|----------|
| 61                                   | 5.158584269                                           | 1.83520735                         | 1.072953852                     |             |          |
| 1.736658759                          | 1.097107939                                           | 0.955884386                        |                                 |             |          |
| ENSG00000212443                      | 4.627846703                                           | 5.561706845                        | 8.800185745                     | 0           |          |
| 0                                    | 0                                                     | 6.329913098                        | 0                               | 5.156143851 |          |
| 0.027016551                          | 1                                                     | SNORA53                            | 12                              | 98599635    | 98599883 |
| +                                    | 249                                                   | snoRNA                             | "small nucleolar RNA, H/ACA box | 53          |          |
| [Source:HGNC Symbol;Acc:HGNC:32646]" | -                                                     | 4                                  | 6                               | 9           |          |
| 0                                    | 0                                                     | 0                                  | 0.878527493                     | 1.062394616 |          |
| 1.674347578                          | 0                                                     | 0                                  | 0                               |             |          |
| ENSG00000187144                      | 3.470885027                                           | 3.707804563                        | 5.866790497                     |             |          |
| 50.2289111                           | 2.741579632                                           | 19.62431039                        | 4.348493363                     |             |          |
| 24.19826704                          | -2.471153026                                          | 0.027029339                        | 0.124682407                     |             |          |
| SPATA21                              | 1                                                     | 16387117                           | 16437424                        | -           | 4506     |
| protein_coding                       | spermatogenesis associated 21                         | [Source:HGNC                       |                                 |             |          |
| Symbol;Acc:HGNC:28026]               | -                                                     | 3                                  | 4                               | 6           | 50       |
| 20                                   | 0.036410344                                           | 0.039138372                        | 0.061682578                     |             | 3        |
| 0.536512733                          | 0.029012735                                           | 0.207197659                        |                                 |             |          |
| ENSG00000250764                      | 0                                                     | 0.926951141                        | 4.888992081                     | 18.082408   |          |
| 12.79403828                          | 15.69944831                                           | 1.938647741                        | 15.5252982                      |             |          |
| -2.97803725                          | 0.02706638                                            | 1                                  | AC025178.1                      | 5           |          |
| 32103445                             | 32121941                                              | -                                  | 834                             | antisense   |          |
| novel transcript                     | -                                                     | 0                                  | 1                               | 5           | 18       |
| 14                                   | 16                                                    | 0                                  | 0.05286496                      | 0.277719522 |          |
| 1.043536565                          | 0.731510531                                           | 0.895570888                        |                                 |             |          |
| ENSG00000100564                      | 441.9593601                                           | 494.0649581                        | 388.1859712                     |             |          |
| 589.6874163                          | 716.4661439                                           | 513.1757167                        | 441.4034298                     |             |          |
| 606.4430923                          | -0.458403036                                          | 0.027080645                        | 0.124871918                     | PIGH        |          |
| 14                                   | 67581955                                              | 67600287                           | -                               | 2915        |          |
| protein_coding                       | phosphatidylinositol glycan anchor biosynthesis class |                                    |                                 |             |          |
| H [Source:HGNC Symbol;Acc:HGNC:8964] | -                                                     | 382                                | 533                             | 397         |          |
| 587                                  | 784                                                   | 523                                | 7.166704809                     | 8.061625289 |          |
| 6.308911038                          | 9.736452706                                           | 11.72022911                        | 8.37546958                      |             |          |
| ENSG00000106991                      | 1508.678025                                           | 1802.919969                        | 2979.351774                     |             |          |
| 1873.538384                          | 1319.613663                                           | 1238.293986                        | 2096.983256                     |             |          |
| 1477.148678                          | 0.505877832                                           | 0.027086759                        | 0.124871918                     | ENG         |          |
| 9                                    | 127815012                                             | 127854756                          | -                               | 3935        |          |
| protein_coding                       | endoglin                                              | [Source:HGNC Symbol;Acc:HGNC:3349] |                                 |             |          |
| 1304                                 | 1945                                                  | 3047                               | 1865                            | 1444        | 1262     |
| 21.79258893                          | 35.86990061                                           | 22.91581544                        | 18.12289472                     | 15.99119997 |          |
| 14.97133934                          |                                                       |                                    |                                 |             |          |
| ENSG00000268941                      | 782.1060928                                           | 959.3944308                        | 808.6392902                     |             |          |
| 1100.013153                          | 840.7510872                                           | 1643.535995                        | 850.0466046                     |             |          |
| 1194.766745                          | -0.490578519                                          | 0.027095981                        | 0.124876775                     |             |          |
| LINC01711                            | 20                                                    | 58634772                           | 58635738                        | +           | 967      |
| lincRNA                              | long intergenic non-protein coding RNA                | 1711                               |                                 |             |          |
| [Source:HGNC Symbol;Acc:HGNC:28663]  | -                                                     | 676                                | 1035                            | 827         |          |
| 1095                                 | 920                                                   | 1675                               | 38.23093633                     | 47.18976707 |          |
| 39.61699141                          | 54.75059732                                           | 41.45910772                        | 80.86011844                     |             |          |
| ENSG00000270673                      | 28.92404189                                           | 14.83121825                        | 11.73358099                     | 0           |          |
| 5.483159264                          | 2.943646558                                           | 18.49628038                        | 2.808935274                     |             |          |



|                                                                     |                                      |                          |                      |                        |                |     |
|---------------------------------------------------------------------|--------------------------------------|--------------------------|----------------------|------------------------|----------------|-----|
|                                                                     | 2.703896256                          | 0.027104189              | 1                    | YTHDF3-AS1             | 8              |     |
|                                                                     | 63167725                             | 63168442                 | -                    | 718                    | lincRNA YTHDF3 |     |
| antisense RNA 1 (head to head) [Source:HGNC                         |                                      |                          |                      | Symbol;Acc:HGNC:48728] |                |     |
|                                                                     | -                                    | 25                       | 16                   | 12                     | 0              | 6   |
|                                                                     |                                      |                          |                      |                        |                | 3   |
| 1.904189987                                                         | 0.982493071                          | 0.774210858              | 0                    | 0                      | 0.364154268    |     |
|                                                                     | 0.195048604                          |                          |                      |                        |                |     |
| ENSG00000259030                                                     | 0                                    | 0                        | 3.911193665          | 12.05493866            |                |     |
| 20.1049173                                                          | 9.812155195                          |                          | 1.303731222          |                        |                |     |
| 13.99067039                                                         | -3.403633716                         | 0.027207047              | 1                    | FPGT-TNNI3K            |                |     |
|                                                                     | 1                                    | 74198235                 | 74544393             | +                      | 9896           |     |
| protein_coding                                                      | FPGT-TNNI3K                          | readthrough [Source:HGNC |                      |                        |                |     |
| Symbol;Acc:HGNC:42952]                                              | -                                    | 0                        | 0                    | 4                      | 12             | 22  |
|                                                                     | 10                                   | 0                        | 0                    | 0.018724178            | 0.058630389    |     |
| 0.096877203                                                         | 0.047172224                          |                          |                      |                        |                |     |
| ENSG00000127152                                                     | 135.3645161                          | 265.1080263              | 47.91212239          |                        |                |     |
| 353.6115342                                                         | 653.4098124                          | 332.6320611              | 149.4615549          |                        |                |     |
| 446.5511359                                                         | -1.578669537                         | 0.027221199              | 0.125416053          | BCL11B                 |                |     |
|                                                                     | 14                                   | 99169287                 | 99271524             | -                      | 7855           |     |
| protein_coding                                                      | B cell CLL/lymphoma 11B [Source:HGNC |                          |                      |                        |                |     |
| Symbol;Acc:HGNC:13222]                                              | zf-C2H2                              | 117                      | 286                  | 49                     | 352            | 715 |
|                                                                     | 339                                  | 0.814581205              | 1.605291114          | 0.288969726            |                |     |
| 2.166694548                                                         | 3.966600389                          | 2.014649705              |                      |                        |                |     |
| ENSG00000140807                                                     | 32.39492692                          | 6.488657986              | 79.20167171          |                        |                |     |
| 18.082408                                                           | 5.483159264                          | 4.906077597              | 39.36175221          |                        |                |     |
| 9.490548286                                                         | 2.055800833                          | 0.02724548               | 0.125490102          | NKD1                   |                |     |
|                                                                     | 16                                   | 50548330                 | 50649249             | +                      | 17425          |     |
| protein_coding                                                      | naked cuticle homolog 1 [Source:HGNC |                          |                      |                        |                |     |
| Symbol;Acc:HGNC:17045]                                              | -                                    | 28                       | 7                    | 81                     | 18             | 6   |
|                                                                     | 5                                    | 0.087877958              | 0.017711658          | 0.215335031            |                |     |
| 0.049946026                                                         | 0.015005037                          | 0.013395017              |                      |                        |                |     |
| ENSG00000171084                                                     | 155.0328645                          | 126.0653552              | 113.4246163          |                        |                |     |
| 202.9248008                                                         | 187.3412749                          | 226.660785               | 131.507612           |                        |                |     |
| 205.6422869                                                         | -0.646725235                         | 0.027272629              | 0.125577315          |                        |                |     |
| FAM86JP 3                                                           | 125916620                            | 125930024                | +                    | 2519                   |                |     |
| transcribed_unprocessed_pseudogene                                  | "family with sequence                |                          |                      |                        |                |     |
| similarity 86 member J, pseudogene [Source:HGNC                     |                                      |                          |                      |                        |                |     |
| Symbol;Acc:HGNC:44097]"                                             | -                                    | 134                      | 136                  | 116                    | 202            | 205 |
|                                                                     | 231                                  | 2.909185027              | 2.380371264          | 2.133203451            |                |     |
| 3.87725548                                                          | 3.546372016                          | 4.2808484                |                      |                        |                |     |
| ENSG00000219790                                                     | 4.627846703                          | 7.415609127              | 6.844588913          | 0                      |                |     |
|                                                                     | 0                                    | 6.296014914              | 0                    | 5.148773124            |                |     |
| 0.027280661                                                         | 1                                    | OSTCP6                   | 6                    | 56975606               | 56976062       |     |
|                                                                     | -                                    | 457                      | processed_pseudogene |                        |                |     |
| oligosaccharyltransferase complex subunit pseudogene 6 [Source:HGNC |                                      |                          |                      |                        |                |     |
| Symbol;Acc:HGNC:42868]                                              | -                                    | 4                        | 8                    | 7                      | 0              | 0   |
|                                                                     | 0                                    | 0.478672529              | 0.771805279          | 0.70955211             | 0              |     |
|                                                                     | 0                                    |                          |                      |                        |                |     |
| ENSG00000149357                                                     | 2427.305596                          | 2720.601598              | 2478.718985          |                        |                |     |
| 2837.933477                                                         | 3104.382004                          | 3444.066473              | 2542.208726          |                        |                |     |
| 3128.793985                                                         | -0.299377651                         | 0.02728897               | 0.125601951          |                        |                |     |

|                                                  |                                                     |                      |                       |             |                  |
|--------------------------------------------------|-----------------------------------------------------|----------------------|-----------------------|-------------|------------------|
| LAMTOR1 11                                       | 72085895                                            | 72103387             | -                     | 2778        |                  |
| protein_coding                                   | "late endosomal/lysosomal adaptor, MAPK and MTOR    |                      |                       |             |                  |
| activator 1 [Source:HGNC Symbol;Acc:HGNC:26068]" |                                                     |                      |                       | -           | 2098             |
| 2935                                             | 2535                                                | 2825                 | 3397                  | 3510        | 41.3017026       |
| 46.5811088                                       | 42.27155052                                         | 49.16855298          | 53.28707762           |             |                  |
| 58.98219232                                      |                                                     |                      |                       |             |                  |
| ENSG00000116641                                  | 2715.389053                                         | 2061.539337          | 2270.447922           |             |                  |
| 1920.753561                                      | 1894.431526                                         | 1809.361418          | 2349.125437           |             |                  |
| 1874.848835                                      | 0.324898596                                         | 0.027297055          | 0.125601951           |             | DOCK7            |
| 1                                                | 62454298                                            | 62688368             | -                     | 24872       |                  |
| protein_coding                                   | dedicator of cytokinesis 7 [Source:HGNC             |                      |                       |             |                  |
| Symbol;Acc:HGNC:19190]                           | -                                                   | 2347                 | 2224                  | 2322        | 1912             |
| 1844                                             | 5.160563107                                         | 3.942375905          | 4.324679844           |             | 2073             |
| 3.716878762                                      | 3.632011298                                         | 3.460957319          |                       |             |                  |
| ENSG00000213063                                  | 0                                                   | 0                    | 0                     | 11.05036044 | 2.741579632      |
| 5.887293117                                      | 0                                                   | 6.559744397          | -5.132095389          |             |                  |
| 0.027308194                                      | 1                                                   | RPL29P7 1            | 168938467             | 168938923   |                  |
| +                                                | 457                                                 | processed_pseudogene | ribosomal protein L29 |             |                  |
| pseudogene 7 [Source:HGNC Symbol;Acc:HGNC:36859] |                                                     |                      |                       | -           | 0                |
| 0                                                | 0                                                   | 11                   | 3                     | 6           | 0                |
| 1.163798255                                      | 0.286064293                                         | 0.612887955          |                       |             |                  |
| ENSG00000176533                                  | 80.9873173                                          | 197.440593           | 199.4708769           |             |                  |
| 211.9660048                                      | 294.2628805                                         | 305.1580266          | 159.2995957           |             |                  |
| 270.462304                                       | -0.760466227                                        | 0.027311002          | 0.125601951           |             | GNG7             |
| 19                                               | 2511219                                             | 2702709              | -                     | 4561        | protein_coding G |
| protein subunit                                  | gamma 7 [Source:HGNC Symbol;Acc:HGNC:4410]          |                      |                       |             | -                |
| 70                                               | 213                                                 | 204                  | 211                   | 322         | 311              |
| 2.058986453                                      | 2.071917941                                         | 2.236781693          | 3.076482133           |             |                  |
| 3.183071196                                      |                                                     |                      |                       |             |                  |
| ENSG00000102893                                  | 919.7845322                                         | 604.3721438          | 734.3266105           |             |                  |
| 669.0490959                                      | 494.3981937                                         | 446.4530614          | 752.8277622           |             |                  |
| 536.6334503                                      | 0.487754468                                         | 0.02731122           | 0.125601951           |             | PHKB             |
| 16                                               | 47461123                                            | 47701523             | +                     | 11822       |                  |
| protein_coding                                   | phosphorylase kinase regulatory subunit beta        |                      |                       |             |                  |
| [Source:HGNC Symbol;Acc:HGNC:8927]               |                                                     |                      |                       | -           | 795              |
| 666                                              | 541                                                 | 455                  | 3.677654159           | 2.4315914   | 652              |
| 2.942736919                                      | 2.723858172                                         | 1.994182532          | 1.796662393           |             | 751              |
| ENSG00000124357                                  | 594.6783013                                         | 722.0949387          | 534.8557336           |             |                  |
| 718.2734287                                      | 830.6986286                                         | 931.173528           | 617.2096579           |             |                  |
| 826.7151951                                      | -0.42125842                                         | 0.027325769          | 0.125601951           |             | NAGK             |
| 2                                                | 71064344                                            | 71079805             | +                     | 8894        |                  |
| protein_coding                                   | N-acetylglucosamine kinase [Source:HGNC             |                      |                       |             |                  |
| Symbol;Acc:HGNC:17174]                           | -                                                   | 514                  | 779                   | 547         | 715              |
| 949                                              | 3.160535746                                         | 3.861662284          | 2.849001363           |             | 909              |
| 3.886960553                                      | 4.453745083                                         | 4.98098373           |                       |             |                  |
| ENSG00000008394                                  | 2234.092996                                         | 1597.136816          | 1467.675423           |             |                  |
| 1328.05241                                       | 1396.377893                                         | 1328.565813          | 1766.301745           |             |                  |
| 1350.998705                                      | 0.386015281                                         | 0.027327277          | 0.125601951           |             | MGST1            |
| 12                                               | 16347142                                            | 16609259             | +                     | 7440        |                  |
| protein_coding                                   | microsomal glutathione S-transferase 1 [Source:HGNC |                      |                       |             |                  |

|                                     |                                                |                                      |                                    |             |      |        |
|-------------------------------------|------------------------------------------------|--------------------------------------|------------------------------------|-------------|------|--------|
| Symbol;Acc:HGNC:7061]               | -                                              | 1931                                 | 1723                               | 1501        | 1322 | 1528   |
| 1354                                | 14.19397549                                    | 10.21048331                          | 9.345665065                        |             |      |        |
| 8.591316847                         | 8.949711102                                    | 8.495555172                          |                                    |             |      |        |
| ENSG00000241015                     | 112.2252825                                    | 122.3575506                          | 139.8251735                        |             |      |        |
| 269.2269635                         | 167.2363576                                    | 172.6939314                          | 124.8026689                        |             |      |        |
| 203.0524175                         | -0.700679768                                   | 0.027347527                          | 0.125605095                        |             |      | TPM3P9 |
| 19                                  | 53431984                                       | 53444670                             | +                                  | 2920        |      |        |
| transcribed_processed_pseudogene    |                                                | tropomyosin 3 pseudogene 9           |                                    |             |      |        |
| [Source:HGNC Symbol;Acc:HGNC:44142] | -                                              | 97                                   | 132                                | 143         |      |        |
| 268                                 | 183                                            | 176                                  | 1.816701587                        | 1.993081407 |      |        |
| 2.268588059                         | 4.437651153                                    | 2.731032296                          | 2.813687442                        |             |      |        |
| ENSG00000269293                     | 77.51643227                                    | 52.83621503                          | 31.28954932                        | 0           |      |        |
| 5.483159264                         | 33.36132766                                    | 53.88073221                          | 12.94816231                        |             |      |        |
| 2.056730099                         | 0.027351954                                    | 0.125605095                          | ZSCAN16-AS1                        |             |      |        |
| 6                                   | 28121795                                       | 28137293                             | -                                  | 2163        |      |        |
| antisense                           | ZSCAN16 antisense RNA 1                        | [Source:HGNC                         |                                    |             |      |        |
| Symbol;Acc:HGNC:48982]              | -                                              | 67                                   | 57                                 | 32          | 0    | 6      |
| 34                                  | 1.693998401                                    | 1.161855971                          | 0.685323958                        |             |      | 0      |
| 0.120879688                         | 0.733784331                                    |                                      |                                    |             |      |        |
| ENSG00000186918                     | 613.1896881                                    | 579.344463                           | 556.3672988                        |             |      |        |
| 667.0399394                         | 842.578807                                     | 786.9348466                          | 582.96715                          |             |      |        |
| 765.5178643                         | -0.393632276                                   | 0.027352611                          | 0.125605095                        |             |      | ZNF395 |
| 8                                   | 28345585                                       | 28402701                             | -                                  | 5819        |      |        |
| protein_coding                      | zinc finger protein 395                        | [Source:HGNC                         |                                    |             |      |        |
| Symbol;Acc:HGNC:18737]              | -                                              | 530                                  | 625                                | 569         | 664  | 922    |
| 802                                 | 4.981065185                                    | 4.73549757                           | 4.52966793                         |             |      |        |
| 5.51722809                          | 6.904641935                                    | 6.433866525                          |                                    |             |      |        |
| ENSG00000111196                     | 684.921312                                     | 595.1026324                          | 559.300694                         |             |      |        |
| 523.3852537                         | 462.413098                                     | 333.6132766                          | 613.1082128                        |             |      |        |
| 439.8038761                         | 0.478789803                                    | 0.02737293                           | 0.125660654                        |             |      | MAGOHB |
| 12                                  | 10604190                                       | 10613623                             | -                                  | 4856        |      |        |
| protein_coding                      | "mago homolog B, exon junction complex subunit | [Source:HGNC Symbol;Acc:HGNC:25504]" | -                                  | 592         | 642  | 572    |
| 521                                 | 506                                            | 340                                  | 6.667111855                        | 5.828949704 |      |        |
| 5.45657095                          | 5.187525705                                    | 4.540779745                          | 3.268483334                        |             |      |        |
| ENSG00000130475                     | 119.1670526                                    | 154.8008405                          | 117.3358099                        |             |      |        |
| 233.0621475                         | 161.7531983                                    | 230.5856471                          | 130.4345677                        |             |      |        |
| 208.4669976                         | -0.674534316                                   | 0.027417755                          | 0.125828646                        |             |      | FCH01  |
| 19                                  | 17747718                                       | 17788568                             | +                                  | 5694        |      |        |
| protein_coding                      | FCH domain only 1                              | [Source:HGNC Symbol;Acc:HGNC:29002]  |                                    |             |      |        |
| -                                   | 103                                            | 167                                  | 120                                | 232         | 177  | 235    |
| 0.98926917                          | 1.293102545                                    | 0.976261672                          | 1.970025005                        |             |      |        |
| 1.354610387                         | 1.926621646                                    |                                      |                                    |             |      |        |
| ENSG00000169733                     | 733.5137024                                    | 1294.950744                          | 1094.156428                        |             |      |        |
| 1281.841811                         | 1374.445256                                    | 1598.400081                          | 1040.873625                        |             |      |        |
| 1418.229049                         | -0.445278549                                   | 0.027433962                          | 0.125837697                        |             |      | RFNG   |
| 17                                  | 82047902                                       | 82051831                             | -                                  | 3865        |      |        |
| protein_coding                      | RFNG 0-fucosylpeptide 3-beta-N-                | acetylglucosaminyltransferase        | [Source:HGNC Symbol;Acc:HGNC:9974] |             |      |        |
| -                                   | 634                                            | 1397                                 | 1119                               | 1276        | 1504 | 1629   |

|                         |                                                        |             |                      |                |
|-------------------------|--------------------------------------------------------|-------------|----------------------|----------------|
| 8.970868124             | 15.93605668                                            | 13.41167572 | 15.96255448          |                |
| 16.95730907             | 19.67513051                                            |             |                      |                |
| ENSG00000106511         | 381.797353                                             | 277.1583911 | 352.0074298          |                |
| 123.5631213             | 211.1016317                                            | 294.3646558 | 336.9877246          |                |
| 209.6764696             | 0.683518042                                            | 0.02743619  | 0.125837697          | MEOX2          |
| 7                       | 15611212                                               | 15686812    | - 2500               |                |
| protein_coding          | mesenchyme homeobox 2 [Source:HGNC                     |             |                      |                |
| Symbol;Acc:HGNC:7014]   | Homeobox                                               | 330         | 299                  | 360 123        |
| 231                     | 300                                                    | 7.218860409 | 5.273089439          | 6.670600749    |
| 2.378845953             | 4.026526567                                            | 5.601795907 |                      |                |
| ENSG00000138398         | 1689.164047                                            | 1714.859611 | 1672.035292          |                |
| 1272.800607             | 1485.936161                                            | 1332.490675 | 1692.01965           |                |
| 1363.742481             | 0.3110085                                              | 0.027464663 | 0.125930506          | PPIG           |
| 2                       | 169584340                                              | 169641406   | + 7368               |                |
| protein_coding          | peptidylprolyl isomerase G [Source:HGNC                |             |                      |                |
| Symbol;Acc:HGNC:14650]  | -                                                      | 1460        | 1850                 | 1710 1267 1626 |
| 1358                    | 10.83672247                                            | 11.07021535 | 10.75100216          |                |
| 8.314348308             | 9.616776476                                            | 8.603916532 |                      |                |
| ENSG00000213041         | 0                                                      | 0           | 9.041203998          | 6.397019142    |
| 3.924862078             | 0                                                      | 6.454361739 | -5.109844222         |                |
| 0.027483074             | 1                                                      | AC093422.1  | 1                    | 205202191      |
| 205202742               | +                                                      | 552         | processed_pseudogene | ribosomal      |
| protein L17 (RPL17)     | pseudogene                                             | -           | 0                    | 0 0 9          |
| 7                       | 4                                                      | 0           | 0                    | 0.788323818    |
| 0.552608499             | 0.3382727                                              |             |                      |                |
| ENSG00000176715         | 1107.212324                                            | 1535.95804  | 1324.916854          |                |
| 1813.263691             | 1545.337053                                            | 1737.732685 | 1322.695739          |                |
| 1698.777809             | -0.360201761                                           | 0.027498295 | 0.126046907          | ACSF3          |
| 16                      | 89088375                                               | 89164121    | + 14618              |                |
| protein_coding          | acyl-CoA synthetase family member 3 [Source:HGNC       |             |                      |                |
| Symbol;Acc:HGNC:27288]  | -                                                      | 957         | 1657                 | 1355 1805 1691 |
| 1771                    | 3.580294019                                            | 4.997680735 | 4.293918464          |                |
| 5.97022179              | 5.040971566                                            | 5.655573352 |                      |                |
| ENSG00000198585         | 688.3921971                                            | 675.7473817 | 954.3312542          |                |
| 639.9163274             | 357.3192121                                            | 611.2972686 | 772.823611           |                |
| 536.1776027             | 0.528208462                                            | 0.027510166 | 0.126056215          | NUDT16         |
| 3                       | 131381671                                              | 131388830   | + 7029               |                |
| protein_coding          | nudix hydrolase 16 [Source:HGNC Symbol;Acc:HGNC:26442] |             |                      |                |
| -                       | 595                                                    | 729         | 976                  | 637 391 623    |
| 4.629329944             | 4.572649812                                            | 6.43218801  | 4.381745058          |                |
| 2.42405133              | 4.137524126                                            |             |                      |                |
| ENSG00000179588         | 465.0985936                                            | 761.9538378 | 789.0833218          |                |
| 826.7678767             | 1014.384464                                            | 953.7414849 | 672.0452511          |                |
| 931.6312752             | -0.470000138                                           | 0.027516817 | 0.126056215          | ZFPM1          |
| 16                      | 88453317                                               | 88537016    | + 6110               |                |
| protein_coding          | "zinc finger protein, FOG family member 1 [Source:HGNC |             |                      |                |
| Symbol;Acc:HGNC:19762]" | zf-C2H2                                                | 402         | 822                  | 807 823 1110   |
| 972                     | 3.598152413                                            | 5.931500417 | 6.118356524          |                |
| 6.512681526             | 7.916630338                                            | 7.426276079 |                      |                |
| ENSG00000175348         | 955.6503441                                            | 800.8857857 | 696.1924723          |                |

|                                                                    |              |              |             |                      |
|--------------------------------------------------------------------|--------------|--------------|-------------|----------------------|
| 491.2387506                                                        | 659.8068315  | 658.3956136  | 817.5762007 |                      |
| 603.1470652                                                        | 0.437897681  | 0.027564612  | 0.126237337 | TMEM9B               |
| 11                                                                 | 8947294      | 8965011 -    | 3064        | protein_coding TMEM9 |
| domain family member B [Source:HGNC Symbol;Acc:HGNC:1168]          |              |              |             |                      |
| 826                                                                | 864          | 712          | 489         | 722 671 14.74300453  |
| 12.4325135                                                         | 10.7644957   | 7.716516953  | 10.26850064 |                      |
| 10.22303376                                                        |              |              |             |                      |
| ENSG00000177200                                                    | 2340.53347   | 1643.484373  | 2219.602405 |                      |
| 1753.993576                                                        | 1387.239294  | 1641.573564  | 2067.873416 |                      |
| 1594.268811                                                        | 0.37503246   | 0.027604982  | 0.126384356 | CHD9                 |
| 16                                                                 | 53055033     | 53329150     | +           | 16504                |
| protein_coding chromodomain helicase DNA binding protein 9         |              |              |             |                      |
| [Source:HGNC Symbol;Acc:HGNC:25701]                                |              |              |             |                      |
| 1746                                                               | 1518         | 1673         | 6.703496401 | 4.736455688          |
| 6.371462011                                                        | 5.115124879  | 4.00812405   | 4.732087449 |                      |
| ENSG00000176476                                                    | 397.9948164  | 494.0649581  | 489.8770065 |                      |
| 697.1772861                                                        | 564.7654042  | 602.466329   | 460.6455937 |                      |
| 621.4696731                                                        | -0.430727258 | 0.02761935   | 0.126412275 | SGF29                |
| 16                                                                 | 28553915     | 28591790     | +           | 2124                 |
| protein_coding SAGA complex associated factor 29 [Source:HGNC      |              |              |             |                      |
| Symbol;Acc:HGNC:25156]                                             |              |              |             |                      |
| 614                                                                | 8.857244695  | 11.06385957  | 10.92661571 | 618                  |
| 15.79814787                                                        | 12.67922067  | 13.49459623  |             |                      |
| ENSG00000122912                                                    | 587.7365313  | 466.2564238  | 524.0999511 |                      |
| 728.319211                                                         | 707.3275451  | 649.5646739  | 526.0309687 |                      |
| 695.0704767                                                        | -0.403014589 | 0.027676855  | 0.126637556 |                      |
| SLC25A16                                                           | 10           | 68477999     | 68527474    | -                    |
| protein_coding solute carrier family 25 member 16                  |              |              |             |                      |
| [Source:HGNC Symbol;Acc:HGNC:10986]                                |              |              |             |                      |
| 725                                                                | 774          | 662          | 3.554916815 | 2.837742344          |
| 3.177153979                                                        | 4.485493593  | 4.315892076  | 3.954349424 |                      |
| ENSG00000161653                                                    | 20.82531016  | 96.40291865  | 86.04626062 |                      |
| 159.7279373                                                        | 127.9403828  | 135.4077417  | 67.75816314 |                      |
| 141.0253539                                                        | -1.051224559 | 0.027704958  | 0.126728215 | NAGS                 |
| 17                                                                 | 44004546     | 44009063     | +           | 2822                 |
| protein_coding N-acetylglutamate synthase [Source:HGNC             |              |              |             |                      |
| Symbol;Acc:HGNC:17996]                                             |              |              |             |                      |
| 138                                                                | 0.348827093  | 1.624838825  | 1.444535165 | 140                  |
| 2.724214696                                                        | 2.161870244  | 2.282801309  |             |                      |
| ENSG00000122218                                                    | 7151.180118  | 6442.310429  | 7199.529738 |                      |
| 5526.184799                                                        | 5354.305022  | 6289.59148   | 6931.006762 |                      |
| 5723.360434                                                        | 0.276171777  | 0.027733845  | 0.126822401 | COPA                 |
| 1                                                                  | 160288686    | 160343400    | -           | 7723                 |
| protein_coding coatamer protein complex subunit alpha [Source:HGNC |              |              |             |                      |
| Symbol;Acc:HGNC:2230]                                              |              |              |             |                      |
| 6410                                                               | 43.76908034  | 39.67644273  | 44.16428679 |                      |
| 34.43949912                                                        | 33.05948325  | 38.74521102  |             |                      |
| ENSG00000172236                                                    | 0            | 0            | 0           | 29.24351608          |
| 0                                                                  | 9.747838692  | -5.706890069 | 0.02774237  | 1                    |
| TPSAB1                                                             | 16           | 1240696      | 1242554     | +                    |
|                                                                    |              |              | 1512        | protein_coding       |

|                                     |                                  |                                                           |                      |             |      |        |
|-------------------------------------|----------------------------------|-----------------------------------------------------------|----------------------|-------------|------|--------|
|                                     |                                  | tryptase alpha/beta 1 [Source:HGNC Symbol;Acc:HGNC:12019] |                      |             |      |        |
| -                                   | 0                                | 0                                                         | 0                    | 0           | 32   | 0      |
| 0                                   | 0                                | 0                                                         | 0.922267246          | 0           |      |        |
| ENSG00000226107                     | 11.56961676                      |                                                           | 2.780853423          | 4.888992081 |      | 0      |
| 0                                   | 0                                | 6.413154087                                               | 0                    | 5.169688733 |      |        |
| 0.027749098                         | 1                                | AC004383.1                                                | X                    | 134522702   |      |        |
| 134522990                           | +                                | 289                                                       | processed_pseudogene | ribosomal   |      |        |
| protein_L36a (RPL36A) pseudogene    |                                  |                                                           | -                    | 10          | 3    | 5      |
| 0                                   | 0                                | 0                                                         | 1.89232998           | 0.457675189 |      |        |
| 0.801446649                         | 0                                | 0                                                         | 0                    |             |      |        |
| ENSG00000150768                     | 2468.956216                      |                                                           | 2473.105644          | 2321.29344  |      |        |
| 2048.334995                         | 1814.011857                      |                                                           | 2067.4211            | 2421.118433 |      |        |
| 1976.589317                         | 0.292744109                      |                                                           | 0.027750719          | 0.126861616 |      | DLAT   |
| 11                                  | 112024814                        |                                                           | 112064390            | +           | 4831 |        |
| protein_coding                      | dihydrolipoamide                 | S-acetyltransferase [Source:HGNC                          |                      |             |      |        |
| Symbol;Acc:HGNC:2896]               |                                  | -                                                         | 2134                 | 2668        | 2374 | 2039   |
| 2107                                | 24.15750568                      |                                                           | 24.3490906           | 22.7638719  |      |        |
| 20.40710527                         | 17.90531935                      |                                                           | 20.35980124          |             |      |        |
| ENSG0000010256                      | 4694.95048                       |                                                           | 4269.536955          | 5235.13272  |      |        |
| 3834.475073                         | 3626.195994                      |                                                           | 4141.710708          | 4733.206718 |      |        |
| 3867.460592                         | 0.291442037                      |                                                           | 0.027775951          | 0.126939001 |      | UQCRC1 |
| 3                                   | 48599002                         |                                                           | 48610976             | -           | 3236 |        |
| protein_coding                      | ubiquinol-cytochrome c reductase | core protein 1                                            |                      |             |      |        |
| [Source:HGNC Symbol;Acc:HGNC:12585] |                                  | -                                                         |                      | 4058        | 4606 | 5354   |
| 3817                                | 3968                             | 4221                                                      | 68.58012028          | 62.75515096 |      |        |
| 76.64296716                         | 57.0315091                       |                                                           | 53.4344998           | 60.89096756 |      |        |
| ENSG00000162769                     | 645.584615                       |                                                           | 553.3898311          | 826.2396617 |      |        |
| 485.2112812                         | 359.1469318                      |                                                           | 581.860803           | 675.0713693 |      |        |
| 475.4063387                         | 0.506299082                      |                                                           | 0.027850055          | 0.127214431 |      | FLVCR1 |
| 1                                   | 212858255                        |                                                           | 212899363            | +           | 6442 |        |
| protein_coding                      | feline leukemia virus subgroup C | cellular receptor 1                                       |                      |             |      |        |
| [Source:HGNC Symbol;Acc:HGNC:24682] |                                  | -                                                         |                      | 558         | 597  | 845    |
| 483                                 | 393                              | 593                                                       | 4.737052426          | 4.08589845  |      |        |
| 6.076289318                         | 3.625163735                      |                                                           | 2.658461821          | 4.297145002 |      |        |
| ENSG00000069702                     | 377.1695063                      |                                                           | 322.578997           | 279.650347  |      |        |
| 230.0484128                         | 233.0342687                      |                                                           | 215.8674143          | 326.4662834 |      |        |
| 226.3166986                         | 0.527489986                      |                                                           | 0.027852862          | 0.127214431 |      | TGFBR3 |
| 1                                   | 91680343                         |                                                           | 91906335             | -           | 8705 |        |
| protein_coding                      | transforming growth factor beta  | receptor 3                                                |                      |             |      |        |
| [Source:HGNC Symbol;Acc:HGNC:11774] |                                  | -                                                         |                      | 326         | 348  | 286    |
| 229                                 | 255                              | 220                                                       | 2.048064064          | 1.762562096 |      |        |
| 1.521947647                         | 1.271943802                      |                                                           | 1.276526993          | 1.179777043 |      |        |
| ENSG00000250497                     | 10.41265508                      |                                                           | 10.19646255          | 0.977798416 |      |        |
| 12.05493866                         | 40.20983461                      |                                                           | 40.2298363           | 7.195638682 |      |        |
| 30.83153652                         | -2.105443242                     |                                                           | 0.027861362          | 0.127215243 |      |        |
| AC007126.1                          | 4                                | 13777377                                                  | 13782157             | -           |      | 4781   |
| lincRNA                             | novel transcript                 |                                                           | -                    | 9           | 11   | 1      |
| 12                                  | 44                               | 41                                                        | 0.102948134          | 0.101439687 |      |        |
| 0.009689106                         | 0.121356689                      |                                                           | 0.401044468          | 0.400323559 |      |        |
| ENSG00000150753                     | 10509.83986                      |                                                           | 9653.269181          | 10085.99066 |      |        |

|                                                                |                                                     |             |             |                 |
|----------------------------------------------------------------|-----------------------------------------------------|-------------|-------------|-----------------|
| 8668.505478                                                    | 8129.697469                                         | 8649.414804 | 10083.03324 |                 |
| 8482.53925                                                     | 0.249331571                                         | 0.027881624 | 0.127251963 | CCT5            |
| 5                                                              | 10249921                                            | 10266412    | + 5839      |                 |
| protein_coding                                                 | chaperonin containing TCP1 subunit 5 [Source:HGNC   |             |             |                 |
| Symbol;Acc:HGNC:1618]                                          | -                                                   | 9084        | 10414       | 10315 8629 8896 |
| 8815                                                           | 85.08115228                                         | 78.63448667 | 81.83389318 |                 |
| 71.45345123                                                    | 66.39186932                                         | 70.47415499 |             |                 |
| ENSG00000142185                                                | 23.13923351                                         | 55.61706845 | 50.84551764 |                 |
| 25.11445555                                                    | 0                                                   | 1.962431039 | 43.20060654 | 9.025628863     |
| 2.267685751                                                    | 0.027886052                                         | 0.127251963 | TRPM2       | 21              |
| 44350163                                                       | 44443081                                            | +           | 6705        | protein_coding  |
| transient receptor potential cation channel subfamily M member |                                                     |             |             |                 |
| 2 [Source:HGNC                                                 | Symbol;Acc:HGNC:12339]                              | -           | 20          | 60 52           |
| 25                                                             | 0                                                   | 2           | 0.163127029 | 0.394535808     |
| 0.359258471                                                    | 0.18027788                                          | 0           | 0.013924424 |                 |
| ENSG00000146122                                                | 142.3062861                                         | 278.0853423 | 247.3829993 |                 |
| 144.659264                                                     | 155.3561792                                         | 101.0651985 | 222.5915426 |                 |
| 133.6935472                                                    | 0.737157343                                         | 0.027933508 | 0.127398778 | DAAM2           |
| 6                                                              | 39792298                                            | 39904877    | + 12955     |                 |
| protein_coding                                                 | dishevelled associated activator of morphogenesis 2 |             |             |                 |
| [Source:HGNC                                                   | Symbol;Acc:HGNC:18143]                              | -           | 123         | 300 253         |
| 144                                                            | 170                                                 | 103         | 0.519233144 | 1.020981318     |
| 0.904660357                                                    | 0.537435427                                         | 0.571834168 | 0.371146905 |                 |
| ENSG00000152558                                                | 8831.088471                                         | 7440.636808 | 7691.362342 |                 |
| 5766.278994                                                    | 7427.853084                                         | 6215.0191   | 7987.695873 |                 |
| 6469.717059                                                    | 0.303911234                                         | 0.027934893 | 0.127398778 |                 |
| TMEM123 11                                                     | 102396332                                           | 102470384   | - 4647      |                 |
| protein_coding                                                 | transmembrane protein 123 [Source:HGNC              |             |             |                 |
| Symbol;Acc:HGNC:30138]                                         | -                                                   | 7633        | 8027        | 7866 5740 8128  |
| 6334                                                           | 89.82915257                                         | 76.1578278  | 78.41221561 |                 |
| 59.72283792                                                    | 76.2201186                                          | 63.6284615  |             |                 |
| ENSG00000178607                                                | 220.9796801                                         | 294.7704628 | 260.0943787 |                 |
| 337.5382826                                                    | 350.9221929                                         | 422.9038889 | 258.6148405 |                 |
| 370.4547881                                                    | -0.516929663                                        | 0.027952565 | 0.127441354 | ERN1            |
| 17                                                             | 64039142                                            | 64130819    | - 10864     |                 |
| protein_coding                                                 | endoplasmic reticulum to nucleus signaling 1        |             |             |                 |
| [Source:HGNC                                                   | Symbol;Acc:HGNC:3449]                               | -           | 191         | 318 266         |
| 336                                                            | 384                                                 | 431         | 0.961475723 | 1.290539557     |
| 1.134212255                                                    | 1.495377139                                         | 1.540281379 | 1.851968302 |                 |
| ENSG00000132153                                                | 4428.849295                                         | 5494.966363 | 5197.97638  |                 |
| 6450.396764                                                    | 6131.085918                                         | 5851.969358 | 5040.597346 |                 |
| 6144.484013                                                    | -0.285482937                                        | 0.027994574 | 0.127594827 | DHX30           |
| 3                                                              | 47802909                                            | 47850195    | + 7744      |                 |
| protein_coding                                                 | DExH-box helicase 30 [Source:HGNC                   |             |             |                 |
| Symbol;Acc:HGNC:16716]                                         | -                                                   | 3828        | 5928        | 5316 6421 6709  |
| 5964                                                           | 27.03343903                                         | 33.75023558 | 31.79963124 |                 |
| 40.09022947                                                    | 37.75296325                                         | 35.95160854 |             |                 |
| ENSG00000108379                                                | 297.3391507                                         | 249.3498569 | 454.6762635 |                 |
| 257.1720248                                                    | 173.6333767                                         | 214.8861988 | 333.7884237 |                 |
| 215.2305334                                                    | 0.633857119                                         | 0.028015905 | 0.127653989 | WNT3            |

|                        |                                                        |             |             |             |               |
|------------------------|--------------------------------------------------------|-------------|-------------|-------------|---------------|
| 17                     | 46762506                                               | 46833154    | -           | 4334        |               |
| protein_coding         | Wnt family member 3 [Source:HGNC                       |             |             |             |               |
| Symbol;Acc:HGNC:12782] | -                                                      | 257         | 269         | 465         | 256 190       |
| 219                    | 3.242940116                                            | 2.736511837 | 4.970115733 |             |               |
| 2.855961015            | 1.910395523                                            | 2.358854991 |             |             |               |
| ENSG00000285560        | 4.627846703                                            | 0           | 0           | 21.09614266 |               |
| 18.27719755            | 5.887293117                                            | 1.542615568 |             |             |               |
| 15.08687778            | -3.356914721                                           | 0.028016668 | 1           | AC103739.3  |               |
| 15                     | 90630535                                               | 90631755    | -           | 888         |               |
| antisense              | "novel transcript, antisense to CRTC3"                 |             |             |             |               |
| 0                      | 0                                                      | 21          | 20          | 6           | 0.246343858 0 |
| 0                      | 1.143424637                                            | 0.981466832 | 0.315416436 |             |               |
| ENSG00000257954        | 0                                                      | 3.707804563 | 2.933395248 | 32.1465031  |               |
| 8.224738897            | 9.812155195                                            | 2.213733271 | 16.72779907 |             |               |
| -2.885502813           | 0.028022594                                            | 1           | AC125611.2  | 12          |               |
| 49389516               | 49390162                                               | +           | 647         |             |               |
| processed_pseudogene   | FGFR1 oncogene partner 2 (FGFR10P2) pseudogene         |             |             |             |               |
| -                      | 0                                                      | 4           | 3           | 32          | 9 10 0        |
| 0.27257729             | 0.214792657                                            | 2.391370757 | 0.606173333 |             |               |
| 0.721509004            |                                                        |             |             |             |               |
| ENSG00000271032        | 31.23796524                                            | 3.707804563 | 14.66697624 | 0           |               |
| 0                      | 4.906077597                                            | 16.53758202 | 1.635359199 |             |               |
| 3.340849846            | 0.028027104                                            | 1           | AC020907.4  | 19          |               |
| 35014961               | 35025335                                               | -           | 526         | antisense   | novel         |
| transcript             | -                                                      | 27          | 4           | 15          | 0 0 5         |
| 2.807195977            | 0.33528043                                             | 1.321015674 | 0           | 0           | 0             |
| 0.443741754            |                                                        |             |             |             |               |
| ENSG00000100124        | 1063.24778                                             | 1208.744288 | 1252.559771 |             |               |
| 1375.267586            | 1663.224977                                            | 1423.743719 | 1174.850613 |             |               |
| 1487.412094            | -0.340076973                                           | 0.028052197 | 0.127781268 |             |               |
| ANKRD54 22             | 37830855                                               | 37849327    | -           | 4487        |               |
| protein_coding         | ankyrin repeat domain 54 [Source:HGNC                  |             |             |             |               |
| Symbol;Acc:HGNC:25185] | -                                                      | 919         | 1304        | 1281        | 1369 1820     |
| 1451                   | 11.20093184                                            | 12.8131373  | 13.22499498 |             |               |
| 14.75192158            | 17.67558988                                            | 15.09584329 |             |             |               |
| ENSG00000166136        | 97.18478076                                            | 144.604378  | 203.3820706 |             |               |
| 79.36167954            | 83.16124884                                            | 89.29061227 | 148.3904098 |             |               |
| 83.93784689            | 0.823929857                                            | 0.028100925 | 0.127938546 | NDUFB8      |               |
| 10                     | 100523740                                              | 100530000   | -           | 1999        |               |
| protein_coding         | NADH:ubiquinone oxidoreductase subunit B8 [Source:HGNC |             |             |             |               |
| Symbol;Acc:HGNC:7703]  | -                                                      | 84          | 156         | 208         | 79 91         |
| 91                     | 2.29805916                                             | 3.440691719 | 4.82006613  |             |               |
| 1.910801237            | 1.98375117                                             | 2.12507682  |             |             |               |
| ENSG00000259498        | 46.27846703                                            | 29.66243651 | 40.08973506 |             |               |
| 12.05493866            | 7.310879019                                            | 19.62431039 | 38.67687953 |             |               |
| 12.99670936            | 1.574269656                                            | 0.028103463 | 0.127938546 | TPM1-       |               |
| AS 15                  | 63046034                                               | 63049387    | -           | 3354        |               |
| antisense              | TPM1 antisense RNA [Source:HGNC Symbol;Acc:HGNC:53635] |             |             |             |               |
| -                      | 40                                                     | 32          | 41          | 12          | 8 20          |
| 0.652216296            | 0.420649985                                            | 0.566269609 | 0.172989365 |             |               |



|                                     |                                                   |             |             |                |      |             |  |
|-------------------------------------|---------------------------------------------------|-------------|-------------|----------------|------|-------------|--|
| 0.103940673                         | 0.278363939                                       |             |             |                |      |             |  |
| ENSG00000162227                     | 430.3897434                                       | 854.6489519 | 756.8159741 |                |      |             |  |
| 984.4866576                         | 955.8974318                                       | 941.9668987 | 680.6182231 |                |      |             |  |
| 960.7836627                         | -0.495853032                                      | 0.028115417 | 0.12795486  | TAF6L          |      |             |  |
| 11                                  | 62771303                                          | 62787342    | + 3149      |                |      |             |  |
| protein_coding                      | TATA-box binding protein associated factor 6 like |             |             |                |      |             |  |
| [Source:HGNC Symbol;Acc:HGNC:17305] | -                                                 | 372         | 922         | 774            |      |             |  |
| 980                                 | 1046                                              | 960         | 6.460483059 | 12.90898863    |      |             |  |
| 11.38598889                         | 15.04716321                                       | 14.47496831 | 14.23130113 |                |      |             |  |
| ENSG00000199753                     | 12.72657843                                       | 24.10072966 | 23.46716199 | 0              |      |             |  |
| 0                                   | 7.849724156                                       | 20.09815669 | 2.616574719 |                |      |             |  |
| 2.948585447                         | 0.028125527                                       | 1           | SNORD104    | 17             |      |             |  |
| 64146083                            | 64146152                                          | +           | 70          | snoRNA "small  |      |             |  |
| nucleolar RNA, C/D box 104          | [Source:HGNC Symbol;Acc:HGNC:32768]" -            |             |             |                |      |             |  |
| 11                                  | 26                                                | 24          | 0           | 0              | 8    | 8.593881439 |  |
| 16.37605416                         | 15.88238274                                       | 0           | 0           | 5.335043721    |      |             |  |
| ENSG00000134852                     | 1299.267962                                       | 1132.734294 | 1291.671708 |                |      |             |  |
| 950.330998                          | 918.4291768                                       | 1069.524916 | 1241.224655 |                |      |             |  |
| 979.4283637                         | 0.341564738                                       | 0.028186559 | 0.128240161 | CLOCK          |      |             |  |
| 4                                   | 55427903                                          | 55547138    | - 11762     |                |      |             |  |
| protein_coding                      | clock circadian regulator [Source:HGNC            |             |             |                |      |             |  |
| Symbol;Acc:HGNC:2082]               | bHLH                                              | 1123        | 1222        | 1321           | 946  | 1005        |  |
| 1090                                | 5.221476094                                       | 4.580617087 | 5.202643866 |                |      |             |  |
| 3.888760331                         | 3.723432494                                       | 4.326048247 |             |                |      |             |  |
| ENSG00000135378                     | 322.7923075                                       | 239.1533943 | 264.0055724 |                |      |             |  |
| 469.1380297                         | 403.0122059                                       | 320.8574749 | 275.3170914 |                |      |             |  |
| 397.6692368                         | -0.531902621                                      | 0.028194883 | 0.128240161 | PRRG4          |      |             |  |
| 11                                  | 32829943                                          | 32858123    | + 5530      |                |      |             |  |
| protein_coding                      | proline rich and Gla domain 4 [Source:HGNC        |             |             |                |      |             |  |
| Symbol;Acc:HGNC:30799]              | -                                                 | 279         | 258         | 270            | 467  | 441         |  |
| 327                                 | 2.759140301                                       | 2.056972723 | 2.261731719 |                |      |             |  |
| 4.083127729                         | 3.475138004                                       | 2.760378634 |             |                |      |             |  |
| ENSG00000164828                     | 6135.367766                                       | 5524.628799 | 6005.637872 |                |      |             |  |
| 4863.163173                         | 4479.741119                                       | 5266.183693 | 5888.544813 |                |      |             |  |
| 4869.695995                         | 0.274048986                                       | 0.028219342 | 0.128301228 | SUN1           |      |             |  |
| 7                                   | 816615                                            | 896435      | + 11811     | protein_coding | Sad1 |             |  |
| and UNC84 domain containing 1       | [Source:HGNC Symbol;Acc:HGNC:18587]               |             |             |                |      |             |  |
| -                                   | 5303                                              | 5960        | 6142        | 4841           | 4902 | 5367        |  |
| 24.55441945                         | 22.24813178                                       | 24.08937866 | 19.81753481 |                |      |             |  |
| 18.0861128                          | 21.21245635                                       |             |             |                |      |             |  |
| ENSG00000178401                     | 245.2758753                                       | 213.1987624 | 394.0527617 |                |      |             |  |
| 173.7920324                         | 116.9740643                                       | 227.6420005 | 284.1757998 |                |      |             |  |
| 172.8026991                         | 0.718696177                                       | 0.028225095 | 0.128301228 |                |      |             |  |
| DNAJC22                             | 12                                                | 49346917    | 49357546    | +              | 5109 |             |  |
| protein_coding                      | DnaJ heat shock protein family (Hsp40) member C22 |             |             |                |      |             |  |
| [Source:HGNC Symbol;Acc:HGNC:25802] | -                                                 | 212         | 230         | 403            |      |             |  |
| 173                                 | 128                                               | 232         | 2.269314411 | 1.984841772    |      |             |  |
| 3.654025714                         | 1.637236496                                       | 1.091773792 | 2.119815767 |                |      |             |  |
| ENSG00000119906                     | 1774.779211                                       | 1378.376346 | 1451.05285  |                |      |             |  |
| 1236.635791                         | 1295.853306                                       | 1060.693977 | 1534.736136 |                |      |             |  |

|                                               |                                                      |             |                |        |
|-----------------------------------------------|------------------------------------------------------|-------------|----------------|--------|
| 1197.727691                                   | 0.357044633                                          | 0.028285186 | 0.128536161    | SLF2   |
| 10                                            | 100912569                                            | 100965136   | + 9208         |        |
| protein_coding                                | SMC5-SMC6 complex localization factor 2 [Source:HGNC |             |                |        |
| Symbol;Acc:HGNC:17814]                        | -                                                    | 1534 1487   | 1484 1231      | 1418   |
| 1081                                          | 9.110763259                                          | 7.119993807 | 7.465708798    |        |
| 6.463890024                                   | 6.710726172                                          | 5.480326324 |                |        |
| ENSG00000133884                               | 1707.675433                                          | 1694.466685 | 1532.210118    |        |
| 2124.68294                                    | 2087.25596                                           | 1876.084073 | 1644.784079    |        |
| 2029.340991                                   | -0.303238904                                         | 0.028329148 | 0.128697676    | DPF2   |
| 11                                            | 65333754                                             | 65353249    | + 7715         |        |
| protein_coding                                | double PHD fingers 2 [Source:HGNC                    |             |                |        |
| Symbol;Acc:HGNC:9964]                         | Others                                               | 1476 1828   | 1567 2115      | 2284   |
| 1912                                          | 10.46273293                                          | 10.44658203 | 9.408827837    |        |
| 13.25487565                                   | 12.90086311                                          | 11.56905787 |                |        |
| ENSG00000274100                               | 0 0                                                  | 0.977798416 | 14.06409511    |        |
| 4.569299387                                   | 5.887293117                                          | 0.325932805 |                |        |
| 8.173562537                                   | -4.487682348                                         | 0.028332408 | 1 AL627230.1   |        |
| 9                                             | 67721884                                             | 67722094    | - 211          |        |
| unprocessed_pseudogene                        | family with sequence similarity 27-like              |             |                |        |
| (FAM27L) pseudogene                           | -                                                    | 0 0         | 1 14           | 5      |
| 6                                             | 0 0                                                  | 0.219543205 | 3.208091872    |        |
| 1.03263335                                    | 1.327439788                                          |             |                |        |
| ENSG00000109046                               | 1465.870443                                          | 1276.411721 | 1361.095395    |        |
| 1066.862072                                   | 1187.103981                                          | 998.8773988 | 1367.79252     |        |
| 1084.28115                                    | 0.334590969                                          | 0.028343724 | 0.128725643    | WSB1   |
| 17                                            | 27294076                                             | 27315926    | + 8602         |        |
| protein_coding                                | WD repeat and SOCS box containing 1 [Source:HGNC     |             |                |        |
| Symbol;Acc:HGNC:19221]                        | -                                                    | 1267 1377   | 1392 1062      | 1299   |
| 1018                                          | 8.055117677                                          | 7.057785579 | 7.496218776    |        |
| 5.969339711                                   | 6.580642692                                          | 5.52451778  |                |        |
| ENSG00000103249                               | 519.4757924                                          | 605.299095  | 686.4144881    |        |
| 911.1524474                                   | 802.3689724                                          | 702.5503119 | 603.7297918    |        |
| 805.3572439                                   | -0.414885476                                         | 0.028364761 | 0.128782924    | CLCN7  |
| 16                                            | 1444934 1475580                                      | - 8119      | protein_coding |        |
| chloride voltage-gated channel 7 [Source:HGNC | Symbol;Acc:HGNC:2025]                                |             |                |        |
| -                                             | 449 653                                              | 702 907     | 878 716        |        |
| 3.024395006                                   | 3.546047901                                          | 4.005318223 | 5.401395299    |        |
| 4.712491417                                   | 4.116769172                                          |             |                |        |
| ENSG00000077348                               | 1170.845216                                          | 1732.471682 | 1527.321126    |        |
| 1879.565853                                   | 1769.232723                                          | 2083.120548 | 1476.879341    |        |
| 1910.639708                                   | -0.370727031                                         | 0.028392506 | 0.128837471    | EXOSC5 |
| 19                                            | 41386374                                             | 41397479    | - 1488         |        |
| protein_coding                                | exosome component 5 [Source:HGNC                     |             |                |        |
| Symbol;Acc:HGNC:24662]                        | -                                                    | 1012 1869   | 1562 1871      | 1936   |
| 2123                                          | 37.19394924                                          | 55.37839034 | 48.62734454    |        |
| 60.79558934                                   | 56.69712269                                          | 66.60289376 |                |        |
| ENSG00000230882                               | 39.33669697                                          | 45.4206059  | 43.02313031    |        |
| 53.24264577                                   | 120.6295038                                          | 89.29061227 | 42.59347773    |        |
| 87.72092062                                   | -1.042366333                                         | 0.028393631 | 0.128837471    |        |
| AC005077.4                                    | 7 76071469                                           | 76074963    | -              | 3495   |

|                                                |                                                       |                                |             |        |  |
|------------------------------------------------|-------------------------------------------------------|--------------------------------|-------------|--------|--|
| processed_pseudogene<br>(LOC285908) pseudogene |                                                       | hypothetical protein LOC285908 |             |        |  |
| 91                                             | 0.532018151                                           | 34 49                          | 44 53       | 132    |  |
| 0.733212577                                    | 1.645831419                                           | 0.618134321                    | 0.583187158 |        |  |
| ENSG00000130723                                | 3544.930574                                           | 1.215458816                    |             |        |  |
| 5327.278311                                    | 4467.860941                                           | 3836.650772                    | 4508.628497 |        |  |
| 4899.424401                                    | -0.305667657                                          | 4903.133951                    | 3963.403281 |        |  |
| 9                                              | 131373636                                             | 0.028410464                    | 0.128863287 | PRRC2B |  |
| protein_coding                                 | proline rich coiled-coil 2B [Source:HGNC              | 131500197                      | + 12390     |        |  |
| Symbol;Acc:HGNC:28121]                         | -                                                     | 3064 4139                      | 4611 5303   | 4889   |  |
| 4997                                           | 13.52421815                                           | 14.72848504                    | 17.23956375 |        |  |
| 20.69433796                                    | 17.19520384                                           | 18.82712816                    |             |        |  |
| ENSG00000104848                                | 46.27846703                                           | 41.71280134                    | 42.04533189 |        |  |
| 14.06409511                                    | 20.1049173                                            | 15.69944831                    | 43.34553342 |        |  |
| 16.62282024                                    | 1.380446962                                           | 0.02841618                     | 0.128863287 | KCNA7  |  |
| 19                                             | 49067418                                              | 49072941                       | - 4372      |        |  |
| protein_coding                                 | potassium voltage-gated channel subfamily A member 7  |                                |             |        |  |
| [Source:HGNC Symbol;Acc:HGNC:6226]             | -                                                     |                                | 40 45       | 43     |  |
| 14                                             | 22 16                                                 | 0.500350745                    | 0.453801909 |        |  |
| 0.455607388                                    | 0.154827856                                           | 0.219281062                    | 0.170838545 |        |  |
| ENSG00000172831                                | 1048.207278                                           | 1457.167193                    | 1247.670779 |        |  |
| 1580.201543                                    | 1529.801435                                           | 1692.596771                    | 1251.015084 |        |  |
| 1600.866583                                    | -0.354956598                                          | 0.028446665                    | 0.128963277 | CES2   |  |
| 16                                             | 66934444                                              | 66945096                       | + 5343      |        |  |
| protein_coding                                 | carboxylesterase 2 [Source:HGNC Symbol;Acc:HGNC:1864] |                                |             |        |  |
| -                                              | 906 1572                                              | 1276 1573                      | 1674 1725   |        |  |
| 9.273373162                                    | 12.9718323                                            | 11.06287374                    | 14.23458352 |        |  |
| 13.65302474                                    | 15.07127385                                           |                                |             |        |  |
| ENSG00000102302                                | 1172.002177                                           | 1423.796952                    | 1260.382158 |        |  |
| 1623.398407                                    | 1520.662836                                           | 1685.728262                    | 1285.393763 |        |  |
| 1609.929835                                    | -0.324212435                                          | 0.028476446                    | 0.129060013 | FGD1   |  |
| X                                              | 54445454                                              | 54496166                       | - 4275      |        |  |
| protein_coding                                 | "FYVE, RhoGEF and PH domain containing 1 [Source:HGNC |                                |             |        |  |
| Symbol;Acc:HGNC:3663]"                         | -                                                     | 1013 1536                      | 1289 1616   | 1664   |  |
| 1718                                           | 12.95889703                                           | 15.84123565                    | 13.96751846 |        |  |
| 18.2770649                                     | 16.96195086                                           | 18.76001046                    |             |        |  |
| ENSG00000197121                                | 600.4631097                                           | 474.5989841                    | 613.0796069 |        |  |
| 397.8129759                                    | 343.6113139                                           | 478.8331735                    | 562.7139002 |        |  |
| 406.7524878                                    | 0.468082016                                           | 0.028488474                    | 0.129062145 | PGAP1  |  |
| 2                                              | 196833004                                             | 196927796                      | - 12761     |        |  |
| protein_coding                                 | post-GPI attachment to proteins 1 [Source:HGNC        |                                |             |        |  |
| Symbol;Acc:HGNC:25712]                         | -                                                     | 519 512                        | 627 396     | 376    |  |
| 488                                            | 2.224218056                                           | 1.768964878                    | 2.276068288 |        |  |
| 1.500416024                                    | 1.283990274                                           | 1.785176451                    |             |        |  |
| ENSG00000164197                                | 133.0505927                                           | 128.8462086                    | 157.425545  |        |  |
| 212.9705831                                    | 229.3788292                                           | 199.1867505                    | 139.7741154 |        |  |
| 213.8453876                                    | -0.613409291                                          | 0.028493801                    | 0.129062145 | RNF180 |  |
| 5                                              | 64165844                                              | 64372869                       | + 5434      |        |  |
| protein_coding                                 | ring finger protein 180 [Source:HGNC                  |                                |             |        |  |
| Symbol;Acc:HGNC:27752]                         | -                                                     | 115 139                        | 161 212     | 251    |  |

|                                     |                                                           |                |             |              |                |
|-------------------------------------|-----------------------------------------------------------|----------------|-------------|--------------|----------------|
|                                     | 203                                                       | 1.15737186     | 1.127792297 | 1.372488448  |                |
| 1.886329008                         | 2.012855901                                               | 1.743903461    |             |              |                |
| ENSG00000164125                     | 308.9087674                                               | 107.5263323    | 300.1841138 |              |                |
| 53.24264577                         | 13.70789816                                               | 0              | 238.8730712 | 22.31684798  |                |
|                                     | 3.420635742                                               | 0.028512136    | 0.129106939 | FAM198B 4    |                |
|                                     | 158124474                                                 | 158173318      | -           | 7880         | protein_coding |
|                                     | family with sequence similarity 198 member B [Source:HGNC |                |             |              |                |
| Symbol;Acc:HGNC:25312]              | -                                                         | 267            | 116         | 307          | 53 15          |
|                                     | 0                                                         | 1.853018506    | 0.649031432 | 1.804739874  |                |
| 0.325200248                         | 0.082951385                                               | 0              |             |              |                |
| ENSG00000144043                     | 1752.796939                                               | 1866.879598    | 2072.932642 |              |                |
| 1673.627318                         | 1337.890861                                               | 1519.90284     | 1897.536393 |              |                |
| 1510.473673                         | 0.329524604                                               | 0.028547619    | 0.129195118 | TEX261       |                |
|                                     | 2                                                         | 70985938       | 70994945    | -            | 4260           |
| protein_coding                      | testis expressed 261 [Source:HGNC                         |                |             |              |                |
| Symbol;Acc:HGNC:30712]              | -                                                         | 1515           | 2014        | 2120         | 1666 1464      |
|                                     | 1549                                                      | 19.44902105    | 20.8441325  | 23.05306727  |                |
| 18.90891521                         | 14.97580151                                               | 16.97414292    |             |              |                |
| ENSG00000184752                     | 537.9871792                                               | 543.1933685    | 603.3016228 |              |                |
| 283.2910586                         | 390.2181677                                               | 508.2696391    | 561.4940568 |              |                |
| 393.9262885                         | 0.511290325                                               | 0.028548512    | 0.129195118 |              |                |
| NDUFA12 12                          | 94897055                                                  | 95003770       | -           | 1815         |                |
| protein_coding                      | NADH:ubiquinone oxidoreductase subunit A12                |                |             |              |                |
| [Source:HGNC Symbol;Acc:HGNC:23987] | -                                                         |                | 465         | 586          | 617            |
|                                     | 282                                                       | 427            | 518         | 14.0110614   | 14.23491718    |
| 15.74747728                         | 7.512313362                                               | 10.25202941    | 13.32291221 |              |                |
| ENSG00000138379                     | 10.41265508                                               | 8.342560268    | 0.977798416 | 0            |                |
|                                     | 0                                                         | 6.577671255    | 0           | 5.208381804  |                |
| 0.028549477                         | 1                                                         | MSTN           | 2           | 190055697    | 190062729      |
| -                                   | 2822                                                      | protein_coding | myostatin   | [Source:HGNC |                |
| Symbol;Acc:HGNC:4223]               | -                                                         | 9              | 9           | 1            | 0 0            |
|                                     | 0                                                         | 0.174413546    | 0.140611052 | 0.016415172  | 0              |
|                                     | 0                                                         |                |             |              |                |
| ENSG00000257027                     | 124.951861                                                | 150.1660848    | 115.3802131 |              |                |
| 251.1445555                         | 216.5847909                                               | 156.9944831    | 130.166053  |              |                |
| 208.2412765                         | -0.677044516                                              | 0.028572564    | 0.129265695 |              |                |
| AC010186.3                          | 12                                                        | 9658567        | 9662085 +   | 2508         | sense_intronic |
|                                     | novel transcript                                          |                | -           | 108          | 162 118 250    |
|                                     | 237                                                       | 160            | 2.355000133 | 2.847878391  | 2.179500289    |
|                                     | 4.819629933                                               | 4.117934283    | 2.978094581 |              |                |
| ENSG00000091947                     | 1103.741439                                               | 1052.089545    | 1017.888151 |              |                |
| 1178.370254                         | 1532.543014                                               | 1326.603382    | 1057.906378 |              |                |
| 1345.838884                         | -0.347735033                                              | 0.028615058    | 0.129419645 |              |                |
| TMEM101 17                          | 44011188                                                  | 44023946       | -           | 3029         |                |
| protein_coding                      | transmembrane protein 101 [Source:HGNC                    |                |             |              |                |
| Symbol;Acc:HGNC:28653]              | -                                                         | 954            | 1135        | 1041         | 1173 1677      |
|                                     | 1352                                                      | 17.22438856    | 16.52077993 | 15.92039768  |                |
| 18.72405703                         | 24.1263924                                                | 20.83643685    |             |              |                |
| ENSG00000139890                     | 1.156961676                                               | 11.12341369    | 0           | 37.16939421  |                |
|                                     | 20.1049173                                                | 16.68066383    | 4.093458455 | 24.65165845  |                |

|                                                            |                                                                |             |             |             |                |             |
|------------------------------------------------------------|----------------------------------------------------------------|-------------|-------------|-------------|----------------|-------------|
|                                                            | -2.567132778                                                   | 0.028627453 | 0.129437405 | REM2        | 14             |             |
|                                                            | 22883165                                                       | 22887686    | +           | 2305        | protein_coding |             |
|                                                            | RRAD and GEM like GTPase 2 [Source:HGNC Symbol;Acc:HGNC:20248] |             |             |             |                |             |
|                                                            | -                                                              | 1           | 12          | 0           | 37             | 22          |
|                                                            |                                                                |             |             |             |                | 17          |
| 0.023725959                                                | 0.229532546                                                    | 0           | 0.776125604 | 0.415920521 |                |             |
|                                                            | 0.344289698                                                    |             |             |             |                |             |
| ENSG00000144741                                            | 651.3694234                                                    | 748.0495707 | 679.5698992 |             |                |             |
| 812.7037816                                                | 1005.245865                                                    | 878.1878899 | 692.9962978 |             |                |             |
| 898.7125122                                                | -0.374793465                                                   | 0.028676583 | 0.129613608 |             |                |             |
| SLC25A26                                                   | 3                                                              | 66133610    | 66388116    | +           | 5850           |             |
|                                                            | protein_coding solute carrier family 25 member 26              |             |             |             |                |             |
|                                                            | [Source:HGNC Symbol;Acc:HGNC:20661]                            |             |             |             |                |             |
|                                                            | 809                                                            | 1100        | 895         | 5.263168104 | 6.082072974    | 695         |
| 5.503403989                                                | 6.686423375                                                    | 8.193989759 | 7.141890793 |             |                |             |
| ENSG00000049246                                            | 193.2125998                                                    | 237.2994921 | 281.6059439 |             |                |             |
| 137.6272164                                                | 165.4086378                                                    | 161.9005607 | 237.3726786 |             |                |             |
| 154.978805                                                 | 0.615892815                                                    | 0.02868338  | 0.129613608 |             | PER3           |             |
| 1                                                          | 7784320                                                        | 7845177     | +           | 8099        | protein_coding | period      |
| circadian regulator 3 [Source:HGNC Symbol;Acc:HGNC:8847]   |                                                                |             |             |             |                |             |
|                                                            | 167                                                            | 256         | 288         | 137         | 181            | 165         |
|                                                            |                                                                |             |             |             |                | 1.127664179 |
|                                                            | 1.393614076                                                    | 1.647265279 | 0.8178815   | 0.973880732 |                |             |
|                                                            | 0.951039557                                                    |             |             |             |                |             |
| ENSG00000136448                                            | 3534.517919                                                    | 3509.437019 | 3547.452654 |             |                |             |
| 4666.265841                                                | 4114.197168                                                    | 4014.15269  | 3530.469197 |             |                |             |
| 4264.8719                                                  | -0.272602558                                                   | 0.028838567 | 0.130276351 |             | NMT1           |             |
| 17                                                         | 45051610                                                       | 45109016    | +           | 6669        |                |             |
| protein_coding                                             | N-myristoyltransferase 1 [Source:HGNC                          |             |             |             |                |             |
| Symbol;Acc:HGNC:7857]                                      | -                                                              | 3055        | 3786        | 3628        | 4645           | 4502        |
|                                                            | 4091                                                           | 25.05216191 | 25.0295966  | 25.20049183 |                |             |
| 33.67644328                                                | 29.41733803                                                    | 28.63616116 |             |             |                |             |
| ENSG00000221978                                            | 4027.383593                                                    | 4129.567332 | 4461.694173 |             |                |             |
| 3491.9139                                                  | 2694.972778                                                    | 3850.289698 | 4206.215033 |             |                |             |
| 3345.725459                                                | 0.330372948                                                    | 0.028867709 | 0.130369475 |             | CCNL2          |             |
| 1                                                          | 1385711                                                        | 1399328     | -           | 6850        | protein_coding | cyclin      |
| L2 [Source:HGNC                                            | Symbol;Acc:HGNC:20570]                                         |             |             |             |                |             |
|                                                            | 3476                                                           | 2949        | 3924        | 27.79125535 | 28.67418579    | 4563        |
| 30.85761478                                                | 24.53524578                                                    | 18.76043045 | 26.74141988 |             |                |             |
| ENSG00000280424                                            | 0                                                              | 1.853902282 | 4.888992081 | 32.1465031  |                |             |
|                                                            | 18.27719755                                                    | 2.943646558 | 2.247631454 | 17.78911574 |                |             |
|                                                            | -2.961414666                                                   | 0.028890134 | 1           | BX537318.2  | 22             |             |
|                                                            | 46006616                                                       | 46010777    | +           | 4162        | TEC            | dynein      |
| heavy chain -like pseudogene [Source:NCBI gene;Acc:730668] |                                                                |             |             |             |                |             |
|                                                            | 0                                                              | 2           | 5           | 32          | 20             | 3           |
|                                                            |                                                                |             |             |             |                | 0           |
| 0.02118663                                                 | 0.055650668                                                    | 0.371748409 | 0.209404745 |             |                |             |
| 0.033648462                                                |                                                                |             |             |             |                |             |
| ENSG00000197712                                            | 1473.969175                                                    | 1074.336372 | 1108.823404 |             |                |             |
| 908.1387127                                                | 882.7886416                                                    | 1014.576847 | 1219.042984 |             |                |             |
| 935.1680671                                                | 0.381741327                                                    | 0.028910606 | 0.13052464  |             |                |             |
| FAM114A1                                                   | 4                                                              | 38867677    | 38945739    | +           | 4871           |             |
|                                                            | protein_coding family with sequence similarity 114 member A1   |             |             |             |                |             |

|                                                                 |              |             |                |               |
|-----------------------------------------------------------------|--------------|-------------|----------------|---------------|
| [Source:HGNC Symbol;Acc:HGNC:25087]                             | -            | 1274        | 1159           | 1134          |
| 904                                                             | 966          | 1034        | 14.30362156    | 10.49057431   |
| 10.78443459                                                     | 8.973286153  | 8.642066316 | 9.909424772    |               |
| ENSG00000176919                                                 | 10.41265508  | 20.3929251  | 1.955596832    | 0             |
| 0                                                               | 1.962431039  | 10.92039234 | 0.65414368     |               |
| 4.073169353                                                     | 0.028917675  | 1           | C8G            | 9             |
| 136946975                                                       | +            | 1152        | protein_coding | complement C8 |
| gamma chain [Source:HGNC Symbol;Acc:HGNC:1354]                  | -            | 9           | 22             |               |
| 2                                                               | 0            | 0           | 2              | 0.427252628   |
| 0.080422945                                                     | 0            | 0           | 0.081044501    | 0.841984622   |
| ENSG00000125648                                                 | 470.883402   | 765.6616423 | 721.6152311    |               |
| 752.4290883                                                     | 974.1746293  | 977.2906574 | 652.7200918    |               |
| 901.298125                                                      | -0.464381027 | 0.028935038 | 0.130596374    |               |
| SLC25A23                                                        | 19           | 6436079     | 6465203        | -             |
| solute carrier family 25 member 23 [Source:HGNC                 |              |             |                |               |
| Symbol;Acc:HGNC:19375]                                          | -            | 407         | 826            | 738           |
| 996                                                             | 4.580809411  | 7.494921806 | 7.035774612    | 749           |
| 7.453086045                                                     | 9.560242387  | 9.568821985 |                | 1066          |
| ENSG00000067560                                                 | 14742.00567  | 11384.81391 | 12366.21657    |               |
| 11096.57104                                                     | 10959.92151  | 9101.755159 | 12831.01205    |               |
| 10386.08257                                                     | 0.304889694  | 0.028952206 | 0.130635294    | RHOA          |
| 3                                                               | 49359145     | 49412998    | -              | 2582          |
| protein_coding ras homolog family member A [Source:HGNC         |              |             |                |               |
| Symbol;Acc:HGNC:667]                                            | -            | 12742       | 12282          | 12647         |
| 9276                                                            | 269.8833396  | 209.723363  | 226.8996032    | 11046         |
| 206.8473767                                                     | 202.4091744  | 167.7067481 |                | 11993         |
| ENSG00000229647                                                 | 19.66834849  | 25.95463194 | 19.55596832    |               |
| 58.26553688                                                     | 63.97019142  | 36.30497422 | 21.72631625    |               |
| 52.84690084                                                     | -1.280576766 | 0.02897657  | 0.130703526    |               |
| MYOSLID 2                                                       | 207239650    | 207245887   | +              | 1204          |
| lincRNA "myocardin-induced smooth muscle lncRNA, inducer of     |              |             |                |               |
| differentiation [Source:HGNC Symbol;Acc:HGNC:51821]"            | -            |             |                | 17            |
| 28                                                              | 20           | 58          | 70             | 37            |
| 1.025334339                                                     | 0.769495288  | 2.329178235 | 2.533553916    |               |
| 1.434568442                                                     |              |             |                |               |
| ENSG00000196781                                                 | 701.1187755  | 889.8730952 | 833.0842506    |               |
| 887.04257                                                       | 1326.924542  | 1024.389002 | 808.0253738    |               |
| 1079.452038                                                     | -0.417515487 | 0.028991122 | 0.130703526    | TLE1          |
| 9                                                               | 81583683     | 81689305    | -              | 4906          |
| protein_coding transducin like enhancer of split 1 [Source:HGNC |              |             |                |               |
| Symbol;Acc:HGNC:11837]                                          | -            | 606         | 960            | 852           |
| 1044                                                            | 6.755224598  | 8.627354569 | 8.0447862      | 883           |
| 8.702306518                                                     | 12.89726639  | 9.933881856 |                | 1452          |
| ENSG00000126858                                                 | 1489.009677  | 1283.82733  | 1100.023218    |               |
| 1016.633161                                                     | 1083.837815  | 891.9249072 | 1290.953408    |               |
| 997.4652942                                                     | 0.371477466  | 0.028992978 | 0.130703526    | RHOT1         |
| 17                                                              | 32142454     | 32253374    | +              | 6446          |
| protein_coding ras homolog family member T1 [Source:HGNC        |              |             |                |               |
| Symbol;Acc:HGNC:21168]                                          | -            | 1287        | 1385           | 1125          |
| 909                                                             | 10.91900233  | 9.473128539 | 8.084714296    | 1012          |
|                                                                 |              |             |                | 1186          |

|                                     |                                                     |                                 |                |                           |      |       |
|-------------------------------------|-----------------------------------------------------|---------------------------------|----------------|---------------------------|------|-------|
| 7.590867797                         | 8.017758772                                         | 6.582935773                     |                |                           |      |       |
| ENSG00000237788                     | 2.313923351                                         | 0.926951141                     | 4.888992081    |                           |      |       |
| 18.082408                           | 10.05245865                                         | 21.58674143                     | 2.709955524    |                           |      |       |
| 16.57386936                         | -2.613021388                                        | 0.029018345                     | 1              | AL162615.1                |      |       |
| 20                                  | 49829125                                            | 49831085                        | +              | 1653                      |      |       |
| processed_pseudogene                | cytokine-like nuclear factor n-pac (N-PAC)          |                                 |                |                           |      |       |
| pseudogene                          | -                                                   | 2                               | 1              | 5                         | 18   | 11 22 |
|                                     | 0.066168586                                         | 0.026672339                     | 0.140119832    | 0.526503022               |      |       |
|                                     | 0.289986933                                         | 0.621292145                     |                |                           |      |       |
| ENSG00000182568                     | 504.4352906                                         | 426.3975248                     | 407.7419395    |                           |      |       |
| 564.5729608                         | 721.0354433                                         | 536.7248891                     | 446.191585     |                           |      |       |
| 607.4444311                         | -0.446371094                                        | 0.029029519                     | 0.13079949     | SATB1                     |      |       |
| 3                                   | 18345387                                            | 18445588                        | -              | 13409                     |      |       |
| protein_coding                      | SATB homeobox 1 [Source:HGNC Symbol;Acc:HGNC:10541] |                                 |                |                           |      |       |
| CUT                                 | 436 460                                             | 417 562                         | 789 547        |                           |      |       |
| 1.778217219                         | 1.512500054                                         | 1.440595719                     | 2.026474491    |                           |      |       |
| 2.564125101                         | 1.904307033                                         |                                 |                |                           |      |       |
| ENSG00000160741                     | 918.6275705                                         | 1110.487467                     | 1087.311839    |                           |      |       |
| 1421.478184                         | 1209.036618                                         | 1327.584598                     | 1038.808959    |                           |      |       |
| 1319.366467                         | -0.34414276                                         | 0.029031378                     | 0.13079949     | CRTC2                     |      |       |
| 1                                   | 153947669                                           | 153958625                       | -              | 3612                      |      |       |
| protein_coding                      | CREB regulated transcription coactivator 2          |                                 |                |                           |      |       |
| [Source:HGNC Symbol;Acc:HGNC:27301] |                                                     | -                               | 794            | 1198                      | 1112 |       |
| 1415                                | 1323 1353                                           | 12.02174394                     | 14.62322069    |                           |      |       |
| 14.26131266                         | 18.94130576                                         | 15.96138967                     | 17.48622615    |                           |      |       |
| ENSG00000129451                     | 10.41265508                                         | 12.05036483                     | 0              | 0                         | 0    |       |
| 0                                   | 7.487673304                                         | 0                               | 5.396699794    | 0.029071351               |      |       |
| 1                                   | KLK10 19                                            | 51012739                        | 51020175       | -                         |      |       |
| 3853                                | protein_coding                                      | kallikrein related peptidase 10 |                |                           |      |       |
| [Source:HGNC Symbol;Acc:HGNC:6358]  |                                                     | -                               | 9              | 13                        | 0    |       |
| 0                                   | 0                                                   | 0                               | 0.127743324    | 0.148757305               | 0    |       |
| 0                                   | 0                                                   | 0                               |                |                           |      |       |
| ENSG00000259515                     | 1.156961676                                         | 0.926951141                     | 7.822387329    |                           |      |       |
| 42.19228532                         | 10.05245865                                         | 9.812155195                     | 3.302100049    |                           |      |       |
| 20.68563306                         | -2.636439049                                        | 0.029109784                     | 0.131114106    |                           |      |       |
| AL117209.1                          | 14                                                  | 102933574                       | 102937177      | +                         | 828  |       |
| antisense                           | "novel transcript, antisense to CDC42BPB"           |                                 |                |                           |      |       |
| -                                   | 1                                                   | 1                               | 8              | 42                        | 11   | 10    |
| 0.066048715                         | 0.053248039                                         | 0.447571172                     | 2.452562989    |                           |      |       |
| 0.578923189                         | 0.563787833                                         |                                 |                |                           |      |       |
| ENSG00000187838                     | 17.35442514                                         | 9.269511408                     | 24.4449604     | 0                         |      |       |
| 0                                   | 5.887293117                                         | 17.02296565                     | 1.962431039    |                           |      |       |
| 3.12273137                          | 0.029146829                                         | 1                               | PLSCR3 17      | 7389727                   |      |       |
| 7394843                             | -                                                   | 2834                            | protein_coding | phospholipid scramblase 3 |      |       |
| [Source:HGNC Symbol;Acc:HGNC:16495] |                                                     | -                               | 15             | 10                        | 25   |       |
| 0                                   | 0                                                   | 6                               | 0.289458379    | 0.155572959               |      |       |
| 0.40864164                          | 0                                                   | 0                               | 0.098831967    |                           |      |       |
| ENSG00000184838                     | 12.72657843                                         | 0                               | 9.777984162    | 0                         | 0    |       |
| 0                                   | 7.501520865                                         | 0                               | 5.396838812    | 0.029219719               |      |       |
| 1                                   | PRR16 5                                             | 120464278                       | 120687332      | +                         |      |       |

|                                     |                |                                                       |                                     |             |             |        |
|-------------------------------------|----------------|-------------------------------------------------------|-------------------------------------|-------------|-------------|--------|
| 2274                                | protein_coding | proline rich 16                                       | [Source:HGNC                        |             |             |        |
| Symbol;Acc:HGNC:29654]              | -              | 11                                                    | 0                                   | 10          | 0           | 0      |
| 0                                   | 0.264543404    | 0                                                     | 0.203709834                         | 0           | 0           | 0      |
| 0                                   |                |                                                       |                                     |             |             |        |
| ENSG00000255495                     | 59.00504546    | 157.5816939                                           | 106.5800274                         |             |             |        |
| 174.7966106                         | 262.2777848    | 147.1823279                                           | 107.7222556                         |             |             |        |
| 194.7522411                         | -0.850781467   | 0.029279285                                           | 0.131838714                         |             |             |        |
| AC145124.1                          | 8              | 12194467                                              | 12196280                            | +           |             | 1361   |
| antisense                           |                | novel transcript                                      | -                                   | 51          |             | 170    |
| 109                                 | 174            | 287                                                   | 150                                 | 2.049305774 | 5.507122717 |        |
| 3.70997368                          |                | 6.181478166                                           | 9.189298715                         | 5.144926439 |             |        |
| ENSG00000236552                     | 2301.196773    | 1890.053376                                           | 1960.485824                         |             |             |        |
| 2268.337625                         | 3085.190946    | 2455.982445                                           | 2050.578658                         |             |             |        |
| 2603.170339                         | -0.344732903   | 0.02930082                                            | 0.131862789                         |             |             |        |
| RPL13AP5                            | 10             | 96750288                                              | 96750899                            | +           |             | 612    |
| processed_pseudogene                |                | ribosomal protein L13a pseudogene 5                   |                                     |             |             |        |
| [Source:HGNC Symbol;Acc:HGNC:23736] | -              | 1989                                                  | 2039                                | 2005        |             |        |
| 2258                                | 3376           | 2503                                                  | 177.7370934                         | 146.8925471 |             |        |
| 151.762828                          | 178.3913253    | 240.386245                                            | 190.921775                          |             |             |        |
| ENSG00000106785                     | 269.5720704    | 297.5513162                                           | 340.2738488                         |             |             |        |
| 206.9431137                         | 175.4610965    | 237.4541557                                           | 302.4657452                         |             |             |        |
| 206.6194553                         | 0.550953504    | 0.029301884                                           | 0.131862789                         |             |             | TRIM14 |
| 9                                   | 98069275       | 98119212                                              | -                                   | 5469        |             |        |
| protein_coding                      |                | tripartite motif containing 14                        | [Source:HGNC                        |             |             |        |
| Symbol;Acc:HGNC:16283]              | -              | 233                                                   | 321                                 | 348         | 206         | 192    |
| 242                                 | 2.329929126    | 2.587802136                                           | 2.947635487                         |             |             |        |
| 1.821212043                         | 1.529860752    | 2.0656345                                             |                                     |             |             |        |
| ENSG00000116001                     | 2000.386737    | 1633.28791                                            | 1553.721683                         |             |             |        |
| 1299.924219                         | 1451.209485    | 1358.002279                                           | 1729.13211                          |             |             |        |
| 1369.711995                         | 0.335564863    | 0.029314941                                           | 0.131864646                         |             |             | TIA1   |
| 2                                   | 70209444       | 70248660                                              | -                                   | 6607        |             |        |
| protein_coding                      |                | TIA1 cytotoxic granule associated RNA binding protein | [Source:HGNC Symbol;Acc:HGNC:11802] |             |             |        |
| [Source:HGNC Symbol;Acc:HGNC:11802] | -              | 1729                                                  | 1762                                | 1589        |             |        |
| 1294                                | 1588           | 1384                                                  | 14.31150805                         | 11.75805684 |             |        |
| 11.14094541                         | 9.469590219    | 10.47381236                                           | 9.778625618                         |             |             |        |
| ENSG00000197694                     | 4016.970938    | 3931.199788                                           | 5154.95325                          |             |             |        |
| 3389.446921                         | 2927.093187    | 3992.565949                                           | 4367.707992                         |             |             |        |
| 3436.368686                         | 0.346122016    | 0.029319548                                           | 0.131864646                         |             |             | SPTAN1 |
| 9                                   | 128552558      | 128633662                                             | +                                   | 16236       |             |        |
| protein_coding                      |                | "spectrin alpha, non-erythrocytic 1                   | [Source:HGNC                        |             |             |        |
| Symbol;Acc:HGNC:11273]"             | -              | 3472                                                  | 4241                                | 5272        | 3374        | 3203   |
| 4069                                | 11.69486968    | 11.51657096                                           | 15.04176553                         |             |             |        |
| 10.04771371                         | 8.596793478    | 11.69916007                                           |                                     |             |             |        |
| ENSG00000102780                     | 1483.224868    | 1314.416718                                           | 1555.67728                          |             |             |        |
| 1219.557962                         | 986.9686676    | 1218.669675                                           | 1451.106289                         |             |             |        |
| 1141.732101                         | 0.346016202    | 0.029392555                                           | 0.132154116                         |             |             | DGKH   |
| 13                                  | 42040036       | 42256578                                              | +                                   | 19637       |             |        |
| protein_coding                      |                | diacylglycerol kinase eta                             | [Source:HGNC                        |             |             |        |
| Symbol;Acc:HGNC:2854]               | -              | 1282                                                  | 1418                                | 1591        | 1214        | 1080   |
| 1242                                | 3.570323741    | 3.183721342                                           | 3.753163597                         |             |             |        |



|                                    |                                                |             |             |        |    |
|------------------------------------|------------------------------------------------|-------------|-------------|--------|----|
| 2.989129723                        | 2.396664335                                    | 2.952517576 |             |        |    |
| ENSG0000011243                     | 780.9491311                                    | 1121.61088  | 952.3756573 |        |    |
| 1332.070722                        | 1121.30607                                     | 1274.59896  | 951.645223  |        |    |
| 1242.658584                        | -0.383868983                                   | 0.029403921 | 0.132166345 | AKAP8L |    |
| 19                                 | 15380048                                       | 15419141    | - 5081      |        |    |
| protein_coding                     | A-kinase anchoring protein 8 like [Source:HGNC |             |             |        |    |
| Symbol;Acc:HGNC:29857]             | -                                              | 675 1210    | 974 1326    | 1227   |    |
| 1299                               | 7.265228713                                    | 10.49953664 | 8.879984706 |        |    |
| 12.61814593                        | 10.5233488                                     | 11.93454845 |             |        |    |
| ENSG00000120594                    | 795.9896329                                    | 257.6924172 | 419.4755205 |        |    |
| 377.7214115                        | 227.5511095                                    | 281.6088541 | 491.0525235 |        |    |
| 295.627125                         | 0.730889754                                    | 0.029425733 | 0.13219798  | PLXDC2 |    |
| 10                                 | 19816239                                       | 20289856    | + 12567     |        |    |
| protein_coding                     | plexin domain containing 2 [Source:HGNC        |             |             |        |    |
| Symbol;Acc:HGNC:21013]             | -                                              | 688 278     | 429 376     | 249    |    |
| 287                                | 2.993998207                                    | 0.97532002  | 1.581350473 |        |    |
| 1.446629931                        | 0.863428401                                    | 1.066096009 |             |        |    |
| ENSG00000221819                    | 6.941770054                                    | 2.780853423 | 19.55596832 |        |    |
| 29.13276844                        | 26.50193645                                    | 50.04199149 | 9.7595306   |        |    |
| 35.22556546                        | -1.850183883                                   | 0.029428254 | 0.13219798  | GAS8-  |    |
| AS1 16                             | 90028908                                       | 90029901    | - 994       |        |    |
| antisense                          | GAS8 antisense RNA 1 [Source:HGNC              |             |             |        |    |
| Symbol;Acc:HGNC:1197]              | -                                              | 6 3         | 20 29       | 29     |    |
| 51                                 | 0.330110683                                    | 0.133066529 | 0.932064715 |        |    |
| 1.410629072                        | 1.271364883                                    | 2.395134065 |             |        |    |
| ENSG00000150593                    | 771.6934377                                    | 714.6793296 | 774.4163456 |        |    |
| 460.0968257                        | 620.5108568                                    | 620.1282083 | 753.596371  |        |    |
| 566.9119636                        | 0.410138397                                    | 0.029464604 | 0.132307464 | PDCD4  |    |
| 10                                 | 110871795                                      | 110900006   | + 4547      |        |    |
| protein_coding                     | programmed cell death 4 [Source:HGNC           |             |             |        |    |
| Symbol;Acc:HGNC:8763]              | -                                              | 667 771     | 792 458     | 679    |    |
| 632                                | 8.022238927                                    | 7.47589825  | 8.068683554 |        |    |
| 4.870143301                        | 6.507338789                                    | 6.488408132 |             |        |    |
| ENSG00000136867                    | 4.627846703                                    | 4.634755704 | 0 0         |        |    |
| 52.09001301                        | 23.54917247                                    | 3.087534136 |             |        |    |
| 25.21306183                        | -3.0372966                                     | 0.029473366 | 0.132307464 |        |    |
| SLC31A2 9                          | 113150942                                      | 113164137   | + 2504      |        |    |
| protein_coding                     | solute carrier family 31 member 2 [Source:HGNC |             |             |        |    |
| Symbol;Acc:HGNC:11017]             | -                                              | 4 5         | 0 0         | 57     |    |
| 24                                 | 0.08736156                                     | 0.088037893 | 0 0         |        |    |
| 0.99197135                         | 0.447427788                                    |             |             |        |    |
| ENSG00000215859                    | 63.63289216                                    | 43.56670362 | 29.33395248 |        |    |
| 10.04578222                        | 25.58807657                                    | 12.75580175 | 45.51118276 |        |    |
| 16.12988685                        | 1.490015064                                    | 0.029478591 | 0.132307464 |        |    |
| PDZK1P1 1                          | 147993862                                      | 148014956   | - 3674      |        |    |
| transcribed_unprocessed_pseudogene | PDZ domain containing 1                        |             |             |        |    |
| pseudogene 1 [Source:HGNC          | Symbol;Acc:HGNC:31974]                         |             |             |        | 55 |
| 47                                 | 30 10                                          | 28 13       | 0.818687671 |        |    |
| 0.56401761                         | 0.378254896                                    | 0.131601871 | 0.332106578 |        |    |
| 0.165177252                        |                                                |             |             |        |    |

|                            |                             |                        |                        |                    |
|----------------------------|-----------------------------|------------------------|------------------------|--------------------|
| ENSG00000272068            | 86.77212568                 | 101.9646255            | 117.3358099            |                    |
| 127.5814342                | 166.3224977                 | 218.8110608            | 102.024187             |                    |
| 170.9049976                | -0.742977902                | 0.029494615            | 0.132340529            |                    |
| AL365181.2                 | 1                           | 156637783              | 156641004              | -                  |
| lincRNA                    | novel transcript            | -                      | 75                     | 110                |
| 127                        | 182                         | 223                    | 1.273005969            | 1.505223906        |
| 1.725274351                | 1.905809122                 | 2.461526126            | 3.230913737            |                    |
| ENSG00000196814            | 345.931541                  | 267.8888797            | 330.4958647            |                    |
| 409.8679146                | 438.6527412                 | 455.284001             | 314.7720951            |                    |
| 434.6015523                | -0.466600079                | 0.029545182            | 0.132512174            | MVB12B             |
| 9                          | 126326849                   | 126507041              | +                      | 7884               |
| protein_coding             | multivesicular body subunit | 12B                    | [Source:HGNC           |                    |
| Symbol;Acc:HGNC:23368]     | -                           | 299                    | 289                    | 338                |
| 464                        | 2.074050304                 | 1.616163094            | 1.985969345            | 480                |
| 2.502158196                | 2.653097556                 | 2.747371576            |                        |                    |
| ENSG00000104897            | 1742.384284                 | 3149.779977            | 2983.262968            |                    |
| 3767.168333                | 2998.374258                 | 3843.42119             | 2625.142409            |                    |
| 3536.32126                 | -0.429338444                | 0.029550995            | 0.132512174            | SF3A2              |
| 19                         | 2236504                     | 2248679                | +                      | 3134               |
| splicing factor            | 3a subunit 2                | [Source:HGNC           | Symbol;Acc:HGNC:10766] |                    |
| -                          | 1506                        | 3398                   | 3051                   | 3750               |
| 26.27971751                | 47.80335087                 | 45.09679431            | 57.85401343            |                    |
| 45.62110876                | 58.34459308                 |                        |                        |                    |
| ENSG00000174780            | 5136.90984                  | 4578.211685            | 5085.529562            |                    |
| 3764.154598                | 4414.857068                 | 4032.795785            | 4933.550362            |                    |
| 4070.602484                | 0.277216413                 | 0.029558874            | 0.132512174            | SRP72              |
| 4                          | 56467336                    | 56503681               | +                      | 6426               |
| protein_coding             | signal recognition particle | 72                     | [Source:HGNC           |                    |
| Symbol;Acc:HGNC:11303]     | -                           | 4440                   | 4939                   | 5201               |
| 4110                       | 37.78652564                 | 33.88693292            | 37.49286157            | 4831               |
| 28.19318807                | 32.76083135                 | 29.85706657            |                        |                    |
| ENSG00000261103            | 3.470885027                 | 13.90426711            | 1.955596832            | 0                  |
| 0                          | 0                           | 6.443582991            | 0                      | 5.18408332         |
| 0.02959452                 | 1                           | AC009063.3             | 16                     | 83710179           |
| 83717898                   | -                           | 566                    | antisense              | "novel transcript, |
| antisense to CDH13"        | -                           | 3                      | 15                     | 2                  |
| 0                          | 0.289867508                 | 1.168446376            | 0.16368769             | 0                  |
| 0                          | 0                           |                        |                        |                    |
| ENSG00000118046            | 1165.060407                 | 2141.257135            | 2287.070495            |                    |
| 2444.138814                | 2318.462509                 | 2930.890757            | 1864.462679            |                    |
| 2564.49736                 | -0.459287504                | 0.029614774            | 0.132699354            | STK11              |
| 19                         | 1177558                     | 1228435                | +                      | 8639               |
| serine/threonine kinase 11 | [Source:HGNC                | Symbol;Acc:HGNC:11389] | -                      |                    |
| 1007                       | 2310                        | 2339                   | 2433                   | 2537               |
| 11.7891492                 | 12.54206952                 | 13.61695027            | 12.79721867            |                    |
| 16.14052974                |                             |                        |                        |                    |
| ENSG00000225855            | 173.5442514                 | 99.18377207            | 130.0471893            |                    |
| 97.44408754                | 45.69299387                 | 73.59116396            | 134.2584043            |                    |
| 72.24274846                | 0.893871985                 | 0.029617989            | 0.132699354            | RUSC1-             |
| AS1                        | 1                           | 155316863              | 155324176              | -                  |
|                            |                             |                        |                        | 3516               |

|                                  |                                                   |             |             |             |       |        |
|----------------------------------|---------------------------------------------------|-------------|-------------|-------------|-------|--------|
| antisense                        | RUSC1 antisense RNA 1 [Source:HGNC                |             |             |             |       |        |
| Symbol;Acc:HGNC:26680]           | -                                                 | 150         | 107         | 133         | 97    | 50     |
| 75                               | 2.333120155                                       | 1.341741551 |             | 1.752286965 |       |        |
| 1.333902493                      | 0.619697488                                       | 0.995768613 |             |             |       |        |
| ENSG00000204438                  | 418.8201266                                       | 457.9138636 |             | 447.8316746 |       |        |
| 557.5409132                      | 538.2634678                                       | 676.0574929 |             | 441.5218883 |       |        |
| 590.6206246                      | -0.419159109                                      | 0.029665599 |             | 0.132873723 |       | GPANK1 |
| 6                                | 31661229                                          | 31666283    |             | -           | 3528  |        |
| protein_coding                   | G-patch domain and ankyrin repeats 1 [Source:HGNC |             |             |             |       |        |
| Symbol;Acc:HGNC:13920]           | -                                                 | 362         | 494         | 458         | 555   | 589    |
| 689                              | 5.611444951                                       | 6.17351248  |             | 6.013666744 |       |        |
| 7.606162913                      | 7.275206352                                       | 9.116679374 |             |             |       |        |
| ENSG00000180353                  | 196.6834849                                       | 309.601681  |             | 293.3395248 |       |        |
| 355.6206906                      | 340.8697343                                       | 487.6641132 |             | 266.5415636 |       |        |
| 394.7181793                      | -0.56427857                                       | 0.029696268 |             | 0.13297213  |       | HCLS1  |
| 3                                | 121631399                                         | 121660927   |             | -           | 5093  |        |
| protein_coding                   | hematopoietic cell-specific Lyn substrate 1       |             |             |             |       |        |
| [Source:HGNC                     | Symbol;Acc:HGNC:4844]                             | -           |             | 170         | 334   | 300    |
| 354                              | 373                                               | 497         | 1.825450067 | 2.891390492 |       |        |
| 2.728663832                      | 3.360708174                                       | 3.19149195  |             | 4.555423401 |       |        |
| ENSG00000272168                  | 76.3594706                                        | 37.07804563 |             | 47.91212239 |       |        |
| 12.05493866                      | 29.24351608                                       | 21.58674143 |             | 53.78321287 |       |        |
| 20.96173206                      | 1.353478201                                       | 0.029717412 |             | 0.133006593 |       | CASC15 |
| 6                                | 21664772                                          | 22368328    |             | +           | 13289 |        |
| lincRNA                          | cancer susceptibility 15 [Source:HGNC             |             |             |             |       |        |
| Symbol;Acc:HGNC:28245]           | -                                                 | 66          | 40          | 49          | 12    | 32     |
| 0.27161037                       | 0.132709388                                       | 0.170807224 |             | 0.043660646 |       |        |
| 0.104934011                      | 0.077281655                                       |             |             |             |       |        |
| ENSG00000079931                  | 144.6202095                                       | 129.7731597 |             | 117.3358099 |       |        |
| 84.38457065                      | 48.4345735                                        | 87.32818123 |             | 130.576393  |       |        |
| 73.3824418                       | 0.832295392                                       | 0.029722292 |             | 0.133006593 |       | MOXD1  |
| 6                                | 132296055                                         | 132401545   |             | -           | 5293  |        |
| protein_coding                   | monooxygenase DBH like 1 [Source:HGNC             |             |             |             |       |        |
| Symbol;Acc:HGNC:21063]           | -                                                 | 125         | 140         | 120         | 84    | 53     |
| 89                               | 1.291525043                                       | 1.16616526  |             | 1.050223684 |       |        |
| 0.767323693                      | 0.436347582                                       | 0.78493582  |             |             |       |        |
| ENSG00000123500                  | 477.8251721                                       | 511.6770297 |             | 350.051833  |       |        |
| 261.1903377                      | 362.8023713                                       | 312.0265352 |             | 446.5180116 |       |        |
| 312.0064148                      | 0.516453807                                       | 0.029730067 |             | 0.133006593 |       |        |
| COL10A1                          | 6                                                 | 116118923   |             | 116158747   |       | -      |
|                                  |                                                   |             |             |             |       | 3816   |
| protein_coding                   | collagen type X alpha 1 chain [Source:HGNC        |             |             |             |       |        |
| Symbol;Acc:HGNC:2185]            | -                                                 | 413         | 552         | 358         | 260   | 397    |
| 318                              | 5.91883725                                        | 6.377708562 |             | 4.345873857 |       |        |
| 3.294323152                      | 4.533574308                                       | 3.890136046 |             |             |       |        |
| ENSG00000285517                  | 224.4505651                                       | 195.5866907 |             | 121.2470036 |       |        |
| 174.7966106                      | 346.3528935                                       | 374.8243284 |             | 180.4280865 |       |        |
| 298.6579442                      | -0.728752153                                      | 0.029765889 |             | 0.133091149 |       |        |
| LINC00941                        | 12                                                | 30795458    |             | 30879268    |       | +      |
|                                  |                                                   |             |             |             |       | 18914  |
| lincRNA                          | long intergenic non-protein coding RNA 941        |             |             |             |       |        |
| [Source:NCBI gene;Acc:100287314] | -                                                 |             |             | 194         | 211   | 124    |

|                                                                       |              |           |             |             |                                                 |
|-----------------------------------------------------------------------|--------------|-----------|-------------|-------------|-------------------------------------------------|
| 174                                                                   | 379          | 382       | 0.56093567  | 0.4918504   |                                                 |
| 0.303697178                                                           | 0.444802357  |           | 0.873201399 | 0.942813981 |                                                 |
| ENSG00000144362                                                       | 42.807582    |           | 23.17377852 | 17.60037149 |                                                 |
| 110.5036044                                                           | 42.03755436  |           | 52.00442253 | 27.86057734 |                                                 |
| 68.18186044                                                           | -1.296724913 |           | 0.029766379 | 0.133091149 |                                                 |
| PHOSPHO2                                                              | 2            | 169694454 | 169701708   | +           | 1488                                            |
| protein_coding "phosphatase, orphan 2 [Source:HGNC                    |              |           |             |             |                                                 |
| Symbol;Acc:HGNC:28316]" -                                             |              |           |             |             |                                                 |
|                                                                       |              |           | 37          | 25          | 18 110                                          |
| 53                                                                    | 1.359857828  |           | 0.740748934 | 0.560366326 | 46                                              |
| 3.574299747                                                           | 1.347142378  |           | 1.662719439 |             |                                                 |
| ENSG00000244462                                                       | 2444.660021  |           | 2440.662354 | 2741.746759 |                                                 |
| 3249.810548                                                           | 3108.951303  |           | 2916.172524 | 2542.356378 |                                                 |
| 3091.644792                                                           | -0.282123133 |           | 0.029803729 | 0.133219184 | RBM12                                           |
| 20                                                                    | 35648925     |           | 35664956    | -           | 6702                                            |
| protein_coding RNA binding motif protein 12 [Source:HGNC              |              |           |             |             |                                                 |
| Symbol;Acc:HGNC:9898]" -                                              |              |           |             |             |                                                 |
|                                                                       |              |           | 2113        | 2633        | 2804 3235                                       |
| 2972                                                                  | 17.24208518  |           | 17.32129641 | 19.38099375 | 3402                                            |
| 23.33839995                                                           | 22.12017118  |           | 20.70095672 |             |                                                 |
| ENSG00000151445                                                       | 831.8554448  |           | 766.5885935 | 705.9704565 |                                                 |
| 1022.66063                                                            | 1039.97254   |           | 890.9436917 | 768.1381649 |                                                 |
| 984.5256207                                                           | -0.358606002 |           | 0.02982705  | 0.133284452 |                                                 |
| VIPAS39 14                                                            | 77426675     |           | 77457952    | -           | 3695                                            |
| protein_coding "VPS33B interacting protein, apical-basolateral        |              |           |             |             |                                                 |
| polarity regulator, spe-39 homolog [Source:HGNC                       |              |           |             |             |                                                 |
| Symbol;Acc:HGNC:20347]" -                                             |              |           |             |             |                                                 |
|                                                                       |              |           | 719         | 827         | 722 1018                                        |
| 908                                                                   | 10.64165464  |           | 9.867906477 | 9.051597017 | 1138                                            |
| 13.32093017                                                           | 13.42104761  |           | 11.47142689 |             |                                                 |
| ENSG00000178695                                                       | 2288.470195  |           | 2066.174093 | 1947.774445 |                                                 |
| 2538.569167                                                           | 2977.355481  |           | 2338.236583 | 2100.806244 |                                                 |
| 2618.053744                                                           | -0.317918912 |           | 0.029841703 | 0.133310962 | KCTD12                                          |
| 13                                                                    | 76880166     |           | 76886390    | -           | 6225                                            |
| protein_coding potassium channel tetramerization domain containing 12 |              |           |             |             |                                                 |
| [Source:HGNC Symbol;Acc:HGNC:14678]" -                                |              |           |             |             |                                                 |
|                                                                       |              |           |             | 1978        | 2229 1992                                       |
| 2527                                                                  | 3258         | 2383      | 17.37727381 | 15.787184   |                                                 |
| 14.82355722                                                           | 19.62759566  |           | 22.8071134  | 17.87025388 |                                                 |
| ENSG00000124570                                                       | 2534.903031  |           | 2618.636973 | 2899.172304 |                                                 |
| 1975.000784                                                           | 1931.899781  |           | 2517.799023 | 2684.237436 |                                                 |
| 2141.566529                                                           | 0.326007907  |           | 0.029863936 | 0.133339374 |                                                 |
| SERPINB6                                                              | 6            | 2948159   | 2972165     | -           | 13201 protein_coding                            |
| serpin family B member 6 [Source:HGNC Symbol;Acc:HGNC:8950]" -        |              |           |             |             |                                                 |
|                                                                       |              |           | 2191        | 2825        | 2965 1966                                       |
| 9.076747604                                                           | 9.43507983   |           | 10.40447863 | 7.20075275  |                                                 |
| 6.978414304                                                           | 9.07393903   |           |             |             |                                                 |
| ENSG00000269378                                                       | 525.2606008  |           | 474.5989841 | 611.1240101 |                                                 |
| 402.835867                                                            | 365.543951   |           | 421.9226734 | 536.9945317 |                                                 |
| 396.7674971                                                           | 0.436783019  |           | 0.029865508 | 0.133339374 |                                                 |
| AC022149.1                                                            | 19           | 14621634  | 14622242    | -           | 609                                             |
| processed_pseudogene integrin beta 1 pseudogene 1 -                   |              |           |             |             |                                                 |
|                                                                       |              |           | 454         | 512         | 625 401 400 430                                 |
|                                                                       |              |           |             |             | 40.76930171                                     |
|                                                                       |              |           |             |             | 37.06693072 47.54065714 31.83671843 28.62208693 |

|                 |                                                     |                  |             |             |             |             |
|-----------------|-----------------------------------------------------|------------------|-------------|-------------|-------------|-------------|
| 32.96075862     |                                                     |                  |             |             |             |             |
| ENSG00000255135 | 68.26073887                                         |                  | 64.88657986 |             | 83.11286537 |             |
| 24.10987733     | 51.17615314                                         |                  | 5.887293117 |             | 72.08672803 |             |
| 27.05777453     | 1.410251584                                         |                  | 0.029882058 |             | 0.133358921 |             |
| AP002360.1      | 11                                                  | 76441338         |             | 76444656    | -           | 754         |
|                 | lincRNA                                             | novel transcript |             | -           | 59          | 70          |
|                 | 24                                                  | 56               | 6           | 4.27932606  | 4.093178197 | 85          |
| 5.222158338     | 1.539008833                                         |                  | 3.236497522 |             | 0.371471877 |             |
| ENSG00000120800 | 2141.536062                                         |                  | 2074.516653 |             | 2243.069567 |             |
| 1932.808499     | 1587.374607                                         |                  | 1709.277435 |             | 2153.040761 |             |
| 1743.153514     | 0.304827515                                         |                  | 0.029887333 |             | 0.133358921 | UTP20       |
|                 | 12                                                  | 101280109        |             | 101386616   | +           | 10024       |
| protein_coding  | "UTP20, small subunit processome component          |                  |             |             |             |             |
|                 | [Source:HGNC Symbol;Acc:HGNC:17897]"                |                  |             |             |             |             |
|                 | 1924                                                | 1737             | 1742        | 10.09857449 | 9.843577891 | 2294        |
| 10.60119471     | 9.280368605                                         |                  | 7.551224084 |             | 8.112470462 |             |
| ENSG00000171940 | 1851.138681                                         |                  | 1362.618177 |             | 1994.708769 |             |
| 1414.446137     | 1496.902479                                         |                  | 940.0044677 |             | 1736.155209 |             |
| 1283.784361     | 0.43516044                                          |                  | 0.030004376 |             | 0.133842107 | ZNF217      |
|                 | 20                                                  | 53567065         |             | 53609907    | -           | 6181        |
| protein_coding  | zinc finger protein 217 [Source:HGNC                |                  |             |             |             |             |
|                 | Symbol;Acc:HGNC:13009] zf-C2H2                      |                  |             |             |             |             |
|                 | 958                                                 | 14.15650191      |             | 10.4855822  | 15.2888169  | 1638        |
| 11.01400141     | 11.5481855                                          |                  | 7.235237662 |             |             |             |
| ENSG00000279926 | 16.19746346                                         |                  | 17.61207168 |             | 4.888992081 |             |
| 49.22433288     | 29.24351608                                         |                  | 39.24862078 |             | 12.89950907 |             |
| 39.23882325     | -1.606492859                                        |                  | 0.030022524 |             | 0.133874911 |             |
| AL138831.3      | 6                                                   | 3982673          | 3984130     | +           | 1458        | TEC         |
|                 | -                                                   | 14               | 19          | 5           | 49          | 32          |
|                 |                                                     |                  |             |             | 40          |             |
| 0.525128059     | 0.574552918                                         |                  | 0.158860138 |             | 1.624949141 |             |
| 0.956425292     | 1.280703225                                         |                  |             |             |             |             |
| ENSG00000188167 | 64.78985384                                         |                  | 123.2845017 |             | 138.8473751 |             |
| 302.3780448     | 101.4384464                                         |                  | 208.0176901 |             | 108.9739102 |             |
| 203.9447271     | -0.900576113                                        |                  | 0.030029245 |             | 0.133874911 | TMPPE       |
|                 | 3                                                   | 33090421         |             | 33096801    | -           | 3966        |
| protein_coding  | transmembrane protein with metallophosphoesterase   |                  |             |             |             |             |
|                 | domain [Source:HGNC Symbol;Acc:HGNC:33865]          |                  |             |             |             |             |
|                 | 142                                                 | 301              | 111         | 212         | 0.772200414 | 1.478539356 |
|                 | 1.658586363                                         |                  | 3.669568526 |             | 1.219632157 | 2.495336889 |
| ENSG00000198815 | 2995.373778                                         |                  | 2829.054882 |             | 2526.631107 |             |
| 3735.021829     | 3579.58914                                          |                  | 3007.425567 |             | 2783.686589 |             |
| 3440.678845     | -0.305857072                                        |                  | 0.030071494 |             | 0.133994643 | FOXJ3       |
|                 | 1                                                   | 42176539         |             | 42335877    | -           | 6893        |
| protein_coding  | forkhead box J3 [Source:HGNC Symbol;Acc:HGNC:29178] |                  |             |             |             |             |
|                 | Fork                                                | 2589             | 3052        | 2584        | 3718        | 3917        |
|                 |                                                     |                  |             |             |             | 3065        |
| 20.54085348     | 19.52136621                                         |                  | 17.36547578 |             | 26.07968391 |             |
| 24.7630361      | 20.75717449                                         |                  |             |             |             |             |
| ENSG00000166278 | 30.08100357                                         |                  | 29.66243651 |             | 38.13413823 |             |
| 8.036625776     | 0                                                   | 14.71823279      |             | 32.62585944 | 7.584952856 |             |
|                 | 2.111054386                                         |                  | 0.030074766 |             | 0.133994643 | C2          |
|                 |                                                     |                  |             |             |             | 6           |

|                                                      |                                                        |                      |             |                |
|------------------------------------------------------|--------------------------------------------------------|----------------------|-------------|----------------|
| 31897785                                             | 31945672                                               | +                    | 5536        | protein_coding |
| complement C2 [Source:HGNC Symbol;Acc:HGNC:1248]     |                                                        |                      |             | -              |
| 26                                                   | 32                                                     | 39                   | 8           | 0              |
| 0.254851888                                          | 0.326340505                                            | 0.069870704          | 0           | 0.256845511    |
| 0.126485637                                          |                                                        |                      |             |                |
| ENSG00000104671                                      | 596.9922247                                            | 371.7074075          | 470.3210382 |                |
| 306.3963577                                          | 396.6151868                                            | 298.2895179          | 479.6735568 |                |
| 333.7670208                                          | 0.52136833                                             | 0.030082398          | 0.133994643 | DCTN6          |
| 8                                                    | 30156297                                               | 30183640             | +           | 1984           |
| protein_coding                                       | dynactin subunit 6 [Source:HGNC Symbol;Acc:HGNC:16964] |                      |             |                |
| -                                                    | 516                                                    | 401                  | 481         | 305            |
| 14.22337782                                          | 8.911209682                                            | 11.23067512          | 7.432918793 | 434            |
| 9.532496609                                          | 7.152830795                                            |                      |             | 304            |
| ENSG00000212766                                      | 5.784808379                                            | 16.68512054          | 0           | 0              |
| 0                                                    | 7.489976305                                            | 0                    | 5.399730957 | 0.030086473    |
| 1                                                    | EWSAT1                                                 | 15                   | 69072926    | 69095820       |
| 3576                                                 | lincRNA Ewing sarcoma associated transcript 1          |                      |             |                |
| [Source:HGNC Symbol;Acc:HGNC:26596]                  | -                                                      | 5                    | 18          | 0              |
| 0                                                    | 0                                                      | 0                    | 0.076465795 | 0.221926392    |
| 0                                                    | 0                                                      | 0                    |             | 0              |
| ENSG00000198934                                      | 157.3467879                                            | 210.417909           | 154.4921498 |                |
| 287.3093715                                          | 266.8470842                                            | 230.5856471          | 174.0856155 |                |
| 261.5807009                                          | -0.585997214                                           | 0.030106448          | 0.134028486 | MAGEE1         |
| X                                                    | 76427724                                               | 76431353             | +           | 3630           |
| protein_coding                                       | MAGE family member E1 [Source:HGNC                     |                      |             |                |
| Symbol;Acc:HGNC:24934]                               | -                                                      | 136                  | 227         | 158            |
| 235                                                  | 2.048929409                                            | 2.757104265          | 2.016289636 | 286            |
| 3.809435499                                          | 3.505377738                                            | 3.02208916           |             | 292            |
| ENSG00000238251                                      | 0                                                      | 0                    | 10.04578222 | 0              |
| 12.75580175                                          | 0                                                      | 7.600527991          | -5.34453452 | 0.030106629    |
| 1                                                    | AL133477.1                                             | 9                    | 96407284    | 96407797       |
| +                                                    | 514                                                    | processed_pseudogene |             | NSA2 ribosome  |
| biogenesis homolog (S. cerevisiae) (NSA2) pseudogene | -                                                      |                      |             | 0              |
| 0                                                    | 0                                                      | 10                   | 0           | 13             |
| 0.940671741                                          | 0                                                      | 1.180663858          | 0           | 0              |
| ENSG00000077150                                      | 1244.890763                                            | 1917.86191           | 1562.521869 |                |
| 1728.87912                                           | 2524.080981                                            | 2022.285186          | 1575.091514 |                |
| 2091.748429                                          | -0.408859266                                           | 0.030107531          | 0.134028486 | NFKB2          |
| 10                                                   | 102394110                                              | 102402529            | +           | 4484           |
| protein_coding                                       | nuclear factor kappa B subunit 2 [Source:HGNC          |                      |             |                |
| Symbol;Acc:HGNC:7795]                                | RHD                                                    | 1076                 | 2069        | 1598           |
| 2061                                                 | 13.12324933                                            | 20.34364856          | 16.50872856 | 1721           |
| 18.55737239                                          | 26.84211101                                            | 21.45647741          |             | 2762           |
| ENSG00000104517                                      | 3414.193905                                            | 3066.354374          | 3652.077084 |                |
| 3038.849122                                          | 2290.132853                                            | 2784.689644          | 3377.541788 |                |
| 2704.557206                                          | 0.320669851                                            | 0.030116347          | 0.134028703 | UBR5           |
| 8                                                    | 102253012                                              | 102412841            | -           | 13085          |
| protein_coding                                       | ubiquitin protein ligase E3 component n-recognin 5     |                      |             |                |
| [Source:HGNC Symbol;Acc:HGNC:16806]                  | -                                                      | 2951                 | 3308        | 3735           |
| 3025                                                 | 2506                                                   | 2838                 | 12.33360954 | 11.14617178    |

|                        |                                                         |             |                      |             |             |
|------------------------|---------------------------------------------------------|-------------|----------------------|-------------|-------------|
| 13.22267535            | 11.17771079                                             | 8.345760883 | 10.12475913          |             |             |
| ENSG00000187189        | 883.9187202                                             | 1073.409421 | 824.2840648          |             |             |
| 1321.020362            | 1159.688184                                             | 1105.82989  | 927.2040687          |             |             |
| 1195.512812            | -0.366172072                                            | 0.0301274   | 0.134038874          | TSPYL4      |             |
| 6                      | 116249961                                               | 116254140   | -                    | 4180        |             |
| protein_coding         | TSPY like 4 [Source:HGNC Symbol;Acc:HGNC:21559] -       |             |                      |             |             |
| 764                    | 1158                                                    | 843         | 1315                 | 1269        | 1127        |
|                        | 12.21423399                                             | 9.342298697 | 15.21075207          | 13.22951546 |             |
|                        | 12.58617222                                             |             |                      |             |             |
| ENSG00000114993        | 301.9669974                                             | 474.5989841 | 425.342311           |             |             |
| 504.2982675            | 547.4020666                                             | 630.921579  | 400.6360975          |             |             |
| 560.873971             | -0.483640777                                            | 0.030143868 | 0.134073119          | RTKN        |             |
| 2                      | 74425836                                                | 74442422    | -                    | 5190        |             |
| protein_coding         | rhotekin [Source:HGNC Symbol;Acc:HGNC:10466] -          |             |                      |             |             |
| 261                    | 512                                                     | 435         | 502                  | 599         | 643         |
|                        | 4.349472217                                             | 3.88261524  | 4.676679152          | 5.029421828 |             |
|                        | 5.783485498                                             |             |                      |             |             |
| ENSG00000230993        | 16.19746346                                             | 0.926951141 | 2.933395248          | 0           |             |
| 0                      | 0                                                       | 6.685936616 | 0                    | 5.227426157 |             |
| 0.03014685             | 1                                                       | RPL12P15    | 2                    | 121658475   |             |
| 121658973              | -                                                       | 499         | processed_pseudogene | ribosomal   |             |
| protein                | L12 pseudogene 15 [Source:HGNC Symbol;Acc:HGNC:36619] - |             |                      |             |             |
| 14                     | 1                                                       | 3           | 0                    | 0           | 1.534342104 |
|                        | 0.088355464                                             | 0.278498695 | 0                    | 0           |             |
| ENSG00000086666        | 1242.57684                                              | 967.736991  | 886.8631635          |             |             |
| 729.3237892            | 875.4777626                                             | 745.7237948 | 1032.392331          |             |             |
| 783.5084488            | 0.396963217                                             | 0.030194664 | 0.134203534          | ZFAND6      |             |
| 15                     | 80059568                                                | 80138393    | +                    | 5153        |             |
| protein_coding         | zinc finger AN1-type containing 6 [Source:HGNC          |             |                      |             |             |
| Symbol;Acc:HGNC:30164] | -                                                       | 1074        | 1044                 | 907         | 726         |
| 760                    | 11.39826767                                             | 8.932526518 | 8.153603725          |             | 958         |
| 6.812047925            | 8.101472541                                             | 6.884929311 |                      |             |             |
| ENSG00000106477        | 1001.928811                                             | 1030.769669 | 944.55327            |             |             |
| 873.9830532            | 762.1591378                                             | 676.0574929 | 992.4172499          |             |             |
| 770.7332279            | 0.364839119                                             | 0.030202197 | 0.134203534          | CEP41       |             |
| 7                      | 130393771                                               | 130442433   | -                    | 12566       |             |
| protein_coding         | centrosomal protein 41 [Source:HGNC                     |             |                      |             |             |
| Symbol;Acc:HGNC:12370] | -                                                       | 866         | 1112                 | 966         | 870         |
| 689                    | 3.768908113                                             | 3.901590542 | 3.561086532          |             | 834         |
| 3.347521798            | 2.892195147                                             | 2.55957702  |                      |             |             |
| ENSG00000139266        | 400.3087398                                             | 474.5989841 | 477.1656271          |             |             |
| 489.2295941            | 717.3800038                                             | 644.6585963 | 450.691117           |             |             |
| 617.0893981            | -0.45297816                                             | 0.030205165 | 0.134203534          | 9-Mar       |             |
| 12                     | 57755098                                                | 57760407    | +                    | 4005        |             |
| protein_coding         | membrane associated ring-CH-type finger 9 [Source:HGNC  |             |                      |             |             |
| Symbol;Acc:HGNC:25139] | -                                                       | 346         | 512                  | 488         | 487         |
| 657                    | 4.724635307                                             | 5.636394709 | 5.644425658          |             | 785         |
| 5.879327563            | 8.541334575                                             | 7.65788579  |                      |             |             |
| ENSG00000187172        | 92.55693406                                             | 226.1760784 | 131.0249878          |             |             |
| 48.21975466            | 94.12756737                                             | 94.19668987 | 149.9193334          |             |             |

|                                               |                                                   |                      |                                |              |
|-----------------------------------------------|---------------------------------------------------|----------------------|--------------------------------|--------------|
| 78.84800397                                   | 0.928369724                                       | 0.030208305          | 0.134203534                    | BAGE2        |
| 21                                            | 10413477                                          | 10516431             | + 4080                         |              |
| transcribed_unprocessed_pseudogene            |                                                   | BAGE family member 2 |                                |              |
| [Source:HGNC Symbol;Acc:HGNC:15723]           |                                                   | -                    | 80 244                         | 134          |
| 48                                            | 103 96                                            | 1.072320322          | 2.636717619                    |              |
| 1.521412889                                   | 0.568829735                                       | 1.100108852          | 1.098391354                    |              |
| ENSG00000164292                               | 2993.059855                                       | 2414.707722          | 2601.921585                    |              |
| 2243.22317                                    | 2240.784419                                       | 1992.84872           | 2669.896387                    |              |
| 2158.952103                                   | 0.306093997                                       | 0.030229924          | 0.134260561                    |              |
| RHOBTB3 5                                     | 95713522                                          | 95824383             | + 8833                         |              |
| protein_coding                                | Rho related BTB domain containing 3 [Source:HGNC  |                      |                                |              |
| Symbol;Acc:HGNC:18757]                        | -                                                 | 2587 2605            | 2661 2233                      | 2452         |
| 2031                                          | 16.017064                                         | 13.00269738          | 13.95529752                    |              |
| 12.22310969                                   | 12.09680927                                       | 10.73365739          |                                |              |
| ENSG00000106733                               | 82.14427898                                       | 97.32986979          | 68.44588913                    |              |
| 130.5951689                                   | 141.648281                                        | 145.2198969          | 82.64001263                    |              |
| 139.1544489                                   | -0.751215451                                      | 0.030263719          | 0.134323173                    | NMRK1        |
| 9                                             | 75060573                                          | 75088217             | - 3865                         |              |
| protein_coding                                | nicotinamide riboside kinase 1 [Source:HGNC       |                      |                                |              |
| Symbol;Acc:HGNC:26057]                        | -                                                 | 71 105               | 70 130                         | 155          |
| 148                                           | 1.004624033                                       | 1.197770903          | 0.838978821                    |              |
| 1.626279062                                   | 1.747595017                                       | 1.787550225          |                                |              |
| ENSG00000167770                               | 2280.371463                                       | 2792.903787          | 2814.103842                    |              |
| 3499.950526                                   | 3016.651455                                       | 3231.142706          | 2629.126364                    |              |
| 3249.248229                                   | -0.305110884                                      | 0.030267388          | 0.134323173                    | OTUB1        |
| 11                                            | 63985853                                          | 64001811             | + 5336                         |              |
| protein_coding                                | "OTU deubiquitinase, ubiquitin aldehyde binding 1 |                      |                                |              |
| [Source:HGNC Symbol;Acc:HGNC:23077]"          | -                                                 |                      | 1971 3013                      | 2878         |
| 3484                                          | 3301 3293                                         | 20.200658            | 24.89529453                    |              |
| 24.98488901                                   | 31.56919749                                       | 26.95803924          | 28.80858621                    |              |
| ENSG00000233834                               | 3.470885027                                       | 10.19646255          | 4.888992081                    | 0            |
| 0                                             | 0                                                 | 6.185446552          | 0                              | 5.124553797  |
| 0.030269857                                   | 1                                                 | AC005083.1           | 7                              | 20217577     |
| 20221700                                      | +                                                 | 901                  | processed_transcript           |              |
| uncharacterized                               | LOC100506098 [Source:NCBI gene;Acc:100506098]     |                      |                                | -            |
| 3                                             | 11                                                | 5                    | 0 0                            | 0 0.18209213 |
| 0.538272078                                   | 0.257067793                                       | 0                    | 0                              | 0            |
| ENSG00000144596                               | 3.470885027                                       | 10.19646255          | 4.888992081                    | 0            |
| 0                                             | 0                                                 | 6.185446552          | 0                              | 5.124553797  |
| 0.030269857                                   | 1                                                 | GRIP2 3              | 14489111                       | 14556075     |
| -                                             | 11885                                             | protein_coding       | glutamate receptor interacting |              |
| protein 2 [Source:HGNC Symbol;Acc:HGNC:23841] | -                                                 |                      | 3                              | 11           |
| 5                                             | 0                                                 | 0                    | 0.013804376                    | 0.040806322  |
| 0.019488269                                   | 0                                                 | 0                    | 0                              |              |
| ENSG00000272734                               | 45.12150535                                       | 64.88657986          | 65.51249388                    |              |
| 6.027469332                                   | 17.36333767                                       | 40.2298363           | 58.5068597                     |              |
| 21.2068811                                    | 1.464992255                                       | 0.03027353           | 0.134323173                    | ADIRF-       |
| AS1 10                                        | 86965345                                          | 86971311             | - 5748                         |              |
| processed_transcript                          | ADIRF antisense RNA 1 [Source:HGNC                |                      |                                |              |
| Symbol;Acc:HGNC:45127]                        | -                                                 | 39 70                | 67 6                           | 19           |



|                                     |                                                                                               |              |             |                           |
|-------------------------------------|-----------------------------------------------------------------------------------------------|--------------|-------------|---------------------------|
| 41                                  | 0.37105865                                                                                    | 0.536926994  | 0.539958645 |                           |
| 0.050470279                         | 0.144044088                                                                                   | 0.332976154  |             |                           |
| ENSG00000085832                     | 1708.832395                                                                                   | 1357.983421  | 1547.854893 |                           |
| 1011.61027                          | 1428.362988                                                                                   | 1111.717184  | 1538.22357  |                           |
| 1183.896814                         | 0.377029653                                                                                   | 0.030279169  | 0.134323173 | EPS15                     |
| 1                                   | 51354263                                                                                      | 51519328     | -           | 7440                      |
| protein_coding                      | epidermal growth factor receptor pathway substrate 15                                         |              |             |                           |
| [Source:HGNC Symbol;Acc:HGNC:3419]  |                                                                                               | -            | 1477        | 1465 1583                 |
| 1007                                | 1563                                                                                          | 1133         | 10.85681087 | 8.681577512               |
| 9.856221052                         | 6.544217901                                                                                   | 9.154711029  | 7.108909904 |                           |
| ENSG00000272913                     | 180.4860214                                                                                   | 192.8058373  | 135.9139798 |                           |
| 284.2956368                         | 239.4312879                                                                                   | 242.3602333  | 169.7352795 |                           |
| 255.362386                          | -0.589232318                                                                                  | 0.030302412  | 0.134384889 |                           |
| AC009237.14                         | 2                                                                                             | 95525109     | 95526702    | - 1594                    |
| lincRNA                             | novel transcript                                                                              |              |             |                           |
| 283                                 | 262                                                                                           | 247          | 5.35218349  | 5.753193431 139           |
| 4.039512338                         | 8.584190264                                                                                   | 7.162614408  | 7.233603037 |                           |
| ENSG00000105058                     | 2610.10554                                                                                    | 3067.281325  | 2656.678297 |                           |
| 3078.027672                         | 3469.925955                                                                                   | 3702.126155  | 2778.021721 |                           |
| 3416.693261                         | -0.298374348                                                                                  | 0.030310812  | 0.134384889 | FAM32A                    |
| 19                                  | 16185380                                                                                      | 16192046     | +           | 1921                      |
| protein_coding                      | family with sequence similarity 32 member A                                                   |              |             |                           |
| [Source:HGNC Symbol;Acc:HGNC:24563] |                                                                                               | -            | 2256        | 3309 2717                 |
| 3064                                | 3797                                                                                          | 3773         | 64.22534461 | 75.94572988               |
| 65.51861818                         | 77.1192172                                                                                    | 86.13344746  | 91.68651725 |                           |
| ENSG00000111052                     | 41.65062033                                                                                   | 5.561706845  | 33.24514615 |                           |
| 2.009156444                         | 11.88017841                                                                                   | 1.962431039  | 26.81915777 |                           |
| 5.283921963                         | 2.330445549                                                                                   | 0.030327178  | 0.134384889 | LIN7A                     |
| 12                                  | 80792520                                                                                      | 80937925     | -           | 6795                      |
| protein_coding                      | "lin-7 homolog A, crumbs cell polarity complex component [Source:HGNC Symbol;Acc:HGNC:17787]" |              |             |                           |
| 34                                  | 2                                                                                             | 13           | 2           | 0.289739531 0.038931017 6 |
| 0.231788514                         | 0.014231208                                                                                   | 0.083370516  | 0.013739995 |                           |
| ENSG00000197136                     | 2352.103087                                                                                   | 3212.812654  | 3713.678385 |                           |
| 4638.137651                         | 3511.049649                                                                                   | 3909.16263   | 3092.864708 |                           |
| 4019.449977                         | -0.37767097                                                                                   | 0.030333667  | 0.134384889 | PCNX3                     |
| 11                                  | 65615773                                                                                      | 65637439     | +           | 7972                      |
| protein_coding                      | pecanex 3 [Source:HGNC Symbol;Acc:HGNC:18760]                                                 |              |             | -                         |
| 2033                                | 3466                                                                                          | 3798         | 4617        | 3842 3984 13.9464862      |
| 19.16881325                         | 22.06937967                                                                                   | 28.00230625  | 21.00142038 |                           |
| 23.32910488                         |                                                                                               |              |             |                           |
| ENSG00000061455                     | 0                                                                                             | 0            | 0           | 0 28.45525006             |
| 0                                   | 9.485083355                                                                                   | -5.664906732 | 0.030338556 | 1                         |
| PRDM6                               | 5                                                                                             | 123089121    | 123194266   | + 9350                    |
| protein_coding                      | PR/SET domain 6 [Source:HGNC                                                                  |              |             |                           |
| Symbol;Acc:HGNC:9350]               | zf-C2H2                                                                                       | 0            | 0           | 0 0 0                     |
| 29                                  | 0                                                                                             | 0            | 0           | 0 0.144787951             |
| ENSG00000270956                     | 2.313923351                                                                                   | 1.853902282  | 3.911193665 |                           |
| 25.11445555                         | 15.53561792                                                                                   | 7.849724156  | 2.693006433 |                           |
| 16.16659921                         | -2.583993727                                                                                  | 0.030345105  | 1           | AC009948.4                |

|                                      |                                                   |             |      |                 |              |
|--------------------------------------|---------------------------------------------------|-------------|------|-----------------|--------------|
| 2                                    | 178541125                                         | 178541799   | +    | 675             |              |
| antisense                            | "novel transcript, antisense to TTN"              |             |      | -               | 2            |
| 2                                    | 4                                                 | 25          | 17   | 8               | 0.162039515  |
| 0.13063519                           | 0.274510319                                       | 1.790760277 |      | 1.097498022     |              |
| 0.553263793                          |                                                   |             |      |                 |              |
| ENSG00000182578                      | 284.6125722                                       | 337.4102153 |      | 365.6966076     |              |
| 261.1903377                          | 188.2551347                                       | 231.5668626 |      | 329.2397984     |              |
| 227.0041117                          | 0.537972083                                       | 0.030349329 |      | 0.134384889     | CSF1R        |
| 5                                    | 150053291                                         | 150113372   | -    | 5151            |              |
| protein_coding                       | colony stimulating factor 1 receptor [Source:HGNC |             |      |                 |              |
| Symbol;Acc:HGNC:2433]                | -                                                 | 246         | 364  | 374             | 260          |
| 236                                  | 2.611790092                                       | 3.115615041 |      | 3.363430887     | 206          |
| 2.440523616                          | 1.742746697                                       | 2.138781845 |      |                 |              |
| ENSG00000100749                      | 1069.032588                                       | 1008.522841 |      | 924.9973017     |              |
| 737.360415                           | 841.6649471                                       | 778.1039069 |      | 1000.85091      |              |
| 785.7097563                          | 0.348651222                                       | 0.03035122  |      | 0.134384889     | VRK1         |
| 14                                   | 96797304                                          | 96931722    | +    | 2744            |              |
| protein_coding                       | vaccinia related kinase 1 [Source:HGNC            |             |      |                 |              |
| Symbol;Acc:HGNC:12718]               | -                                                 | 924         | 1088 | 946             | 734          |
| 793                                  | 18.41546023                                       | 17.48150208 |      | 15.97016801     | 921          |
| 12.9334137                           | 14.62628801                                       | 13.49071961 |      |                 |              |
| ENSG00000142657                      | 2993.059855                                       | 3262.868016 |      | 3653.054883     |              |
| 2649.072771                          | 2781.789467                                       | 2694.417816 |      | 3302.994251     |              |
| 2708.426685                          | 0.286473255                                       | 0.030354616 |      | 0.134384889     | PGD          |
| 1                                    | 10398592                                          | 10420144    | +    | 2966            |              |
| protein_coding                       | phosphogluconate dehydrogenase [Source:HGNC       |             |      |                 |              |
| Symbol;Acc:HGNC:8891]                | -                                                 | 2587        | 3520 | 3736            | 2637         |
| 2746                                 | 47.70017746                                       | 52.32454672 |      | 58.34963943     | 3044         |
| 42.9873031                           | 44.72312059                                       | 43.21907046 |      |                 |              |
| ENSG00000237070                      | 0                                                 | 8.342560268 |      | 13.68917783     | 0            |
| 0                                    | 7.343912698                                       | 0           |      | 5.372895919     | 0.03036352   |
| 1                                    | AC005550.2                                        | 7           |      | 15667947        | 15681980     |
| +                                    | 3743                                              | antisense   |      | uncharacterized | LOC105375166 |
| [Source:NCBI gene;Acc:105375166]     |                                                   |             | -    | 0               | 9            |
| 0                                    | 0                                                 | 0           |      | 0.106012394     | 0.173264929  |
| 0                                    | 0                                                 | 0           |      |                 |              |
| ENSG00000116030                      | 2018.898124                                       | 2077.297507 |      | 1899.862323     |              |
| 1673.627318                          | 1632.153741                                       | 1609.193452 |      | 1998.685984     |              |
| 1638.324837                          | 0.286851697                                       | 0.030426715 |      | 0.134665083     | SUM01        |
| 2                                    | 202206180                                         | 202238608   | -    | 2164            |              |
| protein_coding                       | small ubiquitin-like modifier 1 [Source:HGNC      |             |      |                 |              |
| Symbol;Acc:HGNC:12502]               | -                                                 | 1745        | 2241 | 1943            | 1666         |
| 1640                                 | 44.09942101                                       | 45.65817602 |      | 41.59278489     | 1786         |
| 37.22365009                          | 35.96522618                                       | 35.37794704 |      |                 |              |
| ENSG00000198952                      | 3704.591286                                       | 4314.957561 |      | 4972.104946     |              |
| 5901.897054                          | 5060.042141                                       | 5152.362693 |      | 4330.551264     |              |
| 5371.433963                          | -0.31052746                                       | 0.03047537  |      | 0.134841384     | SMG5         |
| 1                                    | 156249224                                         | 156282825   | -    | 5304            |              |
| protein_coding                       | "SMG5, nonsense mediated mRNA decay factor        |             |      |                 |              |
| [Source:HGNC Symbol;Acc:HGNC:24644]" | -                                                 |             |      | 3202            | 4655         |
|                                      |                                                   |             |      |                 | 5085         |

|                                    |                |             |                                   |             |                                     |
|------------------------------------|----------------|-------------|-----------------------------------|-------------|-------------------------------------|
| 5875                               | 5537           | 5251        | 33.015093                         | 38.69457918 |                                     |
| 44.41093306                        | 53.5556842     |             | 45.49143178                       | 46.21516828 |                                     |
| ENSG00000204362                    | 1.156961676    |             | 10.19646255                       | 7.822387329 | 0                                   |
| 0                                  | 0              | 6.391937185 | 0                                 | 5.173285279 |                                     |
| 0.030516367                        | 1              | AL590644.1  | 1                                 | 17189783    |                                     |
| 17197617                           | +              | 4676        | lincRNA novel transcript          |             | -                                   |
| 1                                  | 11             | 8           | 0                                 | 0           | 0.011695538                         |
| 0.103717524                        |                | 0.079253407 | 0                                 | 0           | 0                                   |
| ENSG00000146021                    | 23.13923351    |             | 0.926951141                       | 0           | 0                                   |
| 0                                  | 8.022061552    |             | 0                                 | 5.49065407  | 0.030536386                         |
| 1                                  | KLHL3          | 5           | 137617500                         | 137736090   | -                                   |
| 11854                              | protein_coding |             | kelch like family member 3        |             |                                     |
| [Source:HGNC Symbol;Acc:HGNC:6354] |                |             | -                                 | 20          | 1                                   |
| 0                                  | 0              | 0           | 0.092269844                       | 0.003719367 | 0                                   |
| 0                                  | 0              | 0           |                                   |             |                                     |
| ENSG00000283839                    | 2.313923351    |             | 11.12341369                       | 19.55596832 |                                     |
| 41.1877071                         | 34.72667534    |             | 35.3237587                        | 10.99776845 |                                     |
| 37.07938038                        | -1.741144333   |             | 0.03059258                        | 0.135320824 |                                     |
| AC096667.1                         | 2              | 184593577   | 184599008                         | -           | 3465                                |
|                                    | antisense      |             | proline-rich protein 18-like      |             | [Source:NCBI                        |
| gene;Acc:105373780]                | -              | 2           | 12                                | 20          | 41                                  |
| 36                                 | 0.031566139    |             | 0.152690482                       | 0.267380181 | 38                                  |
| 0.572113024                        | 0.477902118    |             | 0.485003975                       |             |                                     |
| ENSG00000162408                    | 1600.077998    |             | 1438.628171                       | 1460.830834 |                                     |
| 2121.669205                        | 1777.457462    |             | 1717.127159                       | 1499.845667 |                                     |
| 1872.084609                        | -0.320008211   |             | 0.030644321                       | 0.135489947 | NOL9                                |
| 1                                  | 6521347        | 6554535     | -                                 | 7293        | protein_coding                      |
| nucleolar protein 9                |                |             |                                   |             | [Source:HGNC Symbol;Acc:HGNC:26265] |
| 1552                               | 1494           | 2112        | 1945                              | 1750        | -                                   |
| 9.38251919                         | 9.489576686    |             | 14.00196271                       | 11.62176233 | 1383                                |
| 11.20154353                        |                |             |                                   |             |                                     |
| ENSG00000183496                    | 224.4505651    |             | 185.3902282                       | 266.9389676 |                                     |
| 162.741672                         | 159.9254785    |             | 105.9712761                       | 225.5932536 |                                     |
| 142.8794755                        | 0.658418099    |             | 0.030655094                       | 0.135489947 | MEX3B                               |
| 15                                 | 82041778       |             | 82046141                          | -           | 4364                                |
| protein_coding                     |                |             | mex-3 RNA binding family member B |             | [Source:HGNC                        |
| Symbol;Acc:HGNC:25297]             | -              | 194         | 200                               | 273         | 162                                 |
| 108                                | 2.431149695    |             | 2.02059471                        | 2.897879756 | 175                                 |
| 1.794863761                        | 1.747478755    |             | 1.155274133                       |             |                                     |
| ENSG00000285589                    | 75.20250892    |             | 56.54401959                       | 69.42368755 |                                     |
| 35.16023777                        | 16.44947779    |             | 38.26740526                       | 67.05673869 |                                     |
| 29.95904027                        | 1.163885364    |             | 0.030657403                       | 0.135489947 |                                     |
| AC010422.8                         | 19             | 12668071    | 12681834                          | -           | 5025                                |
|                                    | protein_coding |             | novel transcript                  |             | -                                   |
| 71                                 | 35             | 18          | 39                                | 0.707411317 | 0.535214323                         |
| 0.654522738                        |                | 0.336769843 |                                   | 0.156097173 | 0.362305208                         |
| ENSG00000179841                    | 97.18478076    |             | 57.47097073                       | 100.7132369 |                                     |
| 31.14192488                        | 31.98509571    |             | 58.87293117                       | 85.12299612 |                                     |
| 40.66665059                        | 1.064890225    |             | 0.030697285                       | 0.135626992 | AKAP5                               |
| 14                                 | 64465499       |             | 64474503                          | +           | 7512                                |

|                                    |                                                |             |                          |             |                |                |
|------------------------------------|------------------------------------------------|-------------|--------------------------|-------------|----------------|----------------|
| protein_coding                     | A-kinase anchoring protein 5 [Source:HGNC      |             |                          |             |                |                |
| Symbol;Acc:HGNC:375]               | -                                              | 84          | 62                       | 103         | 31             | 35             |
| 60                                 | 0.611530919                                    | 0.363889956 | 0.635161406              |             |                |                |
| 0.1995296                          | 0.203035072                                    | 0.37285649  |                          |             |                |                |
| ENSG00000238039                    | 1.156961676                                    | 0           | 0                        | 0           | 7.310879019    |                |
| 21.58674143                        | 0.385653892                                    | 9.632540149 | -4.726090024             |             |                |                |
| 0.030734451                        | 1                                              | AC244197.2  | X                        | 149511509   |                |                |
| 149526264                          | -                                              | 655         | lincRNA novel transcript |             |                |                |
| -                                  | 1                                              | 0           | 0                        | 8           | 22             |                |
| 0.083493643                        | 0                                              | 0           | 0.532239723              | 1.567932697 |                |                |
| ENSG00000269343                    | 478.9821337                                    | 449.5713033 | 419.4755205              |             |                |                |
| 653.9804225                        | 529.124869                                     | 610.3160531 | 449.3429859              |             |                |                |
| 597.8071149                        | -0.412025901                                   | 0.030772464 | 0.135894125              |             |                |                |
| ZNF587B 19                         | 57819741                                       | 57846238    | +                        | 4380        |                |                |
| protein_coding                     | zinc finger protein 587B [Source:HGNC          |             |                          |             |                |                |
| Symbol;Acc:HGNC:37142]             | zf-C2H2                                        | 414         | 485                      | 429         | 651            | 579            |
| 622                                | 5.169171526                                    | 4.88204284  | 4.537176118              |             |                |                |
| 7.186345525                        | 5.760538068                                    | 6.629218139 |                          |             |                |                |
| ENSG00000175137                    | 912.8427621                                    | 1276.411721 | 1250.604174              |             |                |                |
| 1610.33889                         | 1299.508746                                    | 1567.001185 | 1146.619552              |             |                |                |
| 1492.28294                         | -0.37918897                                    | 0.030778097 | 0.135894125              |             |                |                |
| SH3BP5L 1                          | 248810446                                      | 248826633   | -                        | 6442        |                |                |
| protein_coding                     | SH3 binding domain protein 5 like [Source:HGNC |             |                          |             |                |                |
| Symbol;Acc:HGNC:29360]             | -                                              | 789         | 1377                     | 1279        | 1603           | 1422           |
| 1597                               | 6.698090258                                    | 9.424258235 | 9.197129038              |             |                |                |
| 12.03134051                        | 9.619167199                                    | 11.57258106 |                          |             |                |                |
| ENSG00000137713                    | 1954.10827                                     | 1771.40363  | 1634.878952              |             |                |                |
| 1364.217226                        | 1543.509333                                    | 1404.119408 | 1786.796951              |             |                |                |
| 1437.281989                        | 0.313591905                                    | 0.030784415 | 0.135894125              |             |                |                |
| PPP2R1B 11                         | 111726908                                      | 111766427   | -                        | 6720        |                |                |
| protein_coding                     | protein phosphatase 2 scaffold subunit Abeta   |             |                          |             |                |                |
| [Source:HGNC Symbol;Acc:HGNC:9303] | -                                              |             | 1689                     | 1911        | 1672           |                |
| 1358                               | 1689                                           | 1431        | 13.74532742              | 12.53791646 |                |                |
| 11.52575692                        | 9.770835764                                    | 10.95264406 | 9.940686933              |             |                |                |
| ENSG00000087266                    | 1498.26537                                     | 1217.086848 | 1635.85675               |             |                |                |
| 1150.242064                        | 715.552284                                     | 1304.035425 | 1450.402989              |             |                |                |
| 1056.609925                        | 0.457200222                                    | 0.030815761 | 0.135993229              | SH3BP2      |                |                |
| 4                                  | 2793023                                        | 2841098     | +                        | 13968       | protein_coding | SH3            |
| domain binding                     | protein 2 [Source:HGNC Symbol;Acc:HGNC:10825]  |             |                          |             |                |                |
| 1295                               | 1313                                           | 1673        | 1145                     | 783         | 1329           | 5.070260286    |
| 4.14442665                         | 5.548354102                                    | 3.963441722 | 2.44279                  |             |                |                |
| 4.441572857                        |                                                |             |                          |             |                |                |
| ENSG00000185761                    | 76.3594706                                     | 99.18377207 | 85.06846221              |             |                |                |
| 150.6867333                        | 102.3523063                                    | 201.1491815 | 86.87056829              |             |                |                |
| 151.3960737                        | -0.799099943                                   | 0.030828299 | 0.136009294              |             |                |                |
| ADAMTSL5                           | 19                                             | 1505018     | 1513604                  | -           | 3625           | protein_coding |
| ADAMTS like 5                      | [Source:HGNC Symbol;Acc:HGNC:27912]            |             |                          |             |                |                |
| 66                                 | 107                                            | 87          | 150                      | 112         | 205            | 0.995704884    |
| 1.301396771                        | 1.111766792                                    | 2.000711482 | 1.346382969              |             |                |                |
| 2.639926807                        |                                                |             |                          |             |                |                |

|                                    |                                                      |             |             |             |        |
|------------------------------------|------------------------------------------------------|-------------|-------------|-------------|--------|
| ENSG00000164403                    | 246.4328369                                          | 532.0699548 | 611.1240101 |             |        |
| 315.4375617                        | 233.0342687                                          | 335.5757077 | 463.208934  |             |        |
| 294.6825127                        | 0.654326519                                          | 0.030842698 | 0.13603356  |             |        |
| SHROOM1 5                          | 132822141                                            | 132830898   | -           | 4420        |        |
| protein_coding                     | shroom family member 1 [Source:HGNC                  |             |             |             |        |
| Symbol;Acc:HGNC:24084]             | -                                                    | 213         | 574         | 625         | 314    |
| 342                                | 2.635433407                                          | 5.725633972 | 6.550285112 |             | 255    |
| 3.434856478                        | 2.51406504                                           | 3.612017723 |             |             |        |
| ENSG00000142327                    | 618.9744965                                          | 975.1526002 | 981.7096098 |             |        |
| 1004.578222                        | 1211.778197                                          | 1262.824374 | 858.6122355 |             |        |
| 1159.726931                        | -0.432705301                                         | 0.030869291 | 0.136111579 |             |        |
| RNPEPL1 2                          | 240565804                                            | 240581372   | +           | 7867        |        |
| protein_coding                     | arginyl aminopeptidase like 1 [Source:HGNC           |             |             |             |        |
| Symbol;Acc:HGNC:10079]             | -                                                    | 535         | 1052        | 1004        | 1000   |
| 1287                               | 3.719112748                                          | 5.8957702   | 5.911899171 |             | 1326   |
| 6.145993071                        | 7.345019813                                          | 7.636870611 |             |             |        |
| ENSG00000197111                    | 3942.925391                                          | 3383.371664 | 3847.636768 |             |        |
| 3073.004781                        | 3002.029697                                          | 3162.457619 | 3724.644608 |             |        |
| 3079.164033                        | 0.274417679                                          | 0.030885977 | 0.136145886 |             | PCBP2  |
| 12                                 | 53452102                                             | 53481162    | +           | 7926        |        |
| protein_coding                     | poly(rC) binding protein 2 [Source:HGNC              |             |             |             |        |
| Symbol;Acc:HGNC:8648]              | -                                                    | 3408        | 3650        | 3935        | 3059   |
| 3223                               | 23.51474269                                          | 20.30358624 | 22.99816177 |             | 3285   |
| 18.66064391                        | 18.06092144                                          | 18.98245038 |             |             |        |
| ENSG00000101367                    | 4441.575873                                          | 3736.540049 | 4192.799609 |             |        |
| 3586.344253                        | 3529.326847                                          | 2949.533852 | 4123.63851  |             |        |
| 3355.068317                        | 0.297397321                                          | 0.030945488 | 0.136333051 |             | MAPRE1 |
| 20                                 | 32819893                                             | 32850405    | +           | 2623        |        |
| protein_coding                     | microtubule associated protein RP/EB family member 1 |             |             |             |        |
| [Source:HGNC Symbol;Acc:HGNC:6890] | -                                                    |             | 3839        | 4031        | 4288   |
| 3570                               | 3862                                                 | 3006        | 80.04137383 | 67.75611018 |        |
| 75.72842804                        | 65.80685595                                          | 64.16121458 | 53.49789838 |             |        |
| ENSG00000171723                    | 502.1213673                                          | 535.7777594 | 487.9214097 |             |        |
| 427.9503226                        | 346.3528935                                          | 357.1624491 | 508.6068454 |             |        |
| 377.1552217                        | 0.431936381                                          | 0.030951544 | 0.136333051 |             | GPHN   |
| 14                                 | 66507407                                             | 67181803    | +           | 6007        |        |
| protein_coding                     | gephyrin [Source:HGNC Symbol;Acc:HGNC:15465]         |             |             |             |        |
| 434                                | 578                                                  | 499         | 426         | 379         | 364    |
| 4.242327229                        | 3.848091317                                          | 3.428887084 | 2.749414228 |             |        |
| 2.82871887                         |                                                      |             |             |             |        |
| ENSG00000111737                    | 1339.76162                                           | 1856.683135 | 1699.413647 |             |        |
| 1968.973315                        | 2171.331069                                          | 2051.721651 | 1631.952801 |             |        |
| 2064.008678                        | -0.338264693                                         | 0.030955192 | 0.136333051 |             | RAB35  |
| 12                                 | 120095095                                            | 120117502   | -           | 4022        |        |
| protein_coding                     | "RAB35, member RAS oncogene family [Source:HGNC      |             |             |             |        |
| Symbol;Acc:HGNC:9774]"             | -                                                    | 1158        | 2003        | 1738        | 1960   |
| 2091                               | 15.7456722                                           | 21.95699187 | 20.01751496 |             | 2376   |
| 23.56216656                        | 25.74322591                                          | 24.26934204 |             |             |        |
| ENSG00000250131                    | 2.313923351                                          | 6.488657986 | 9.777984162 |             | 0      |
| 0                                  | 0                                                    | 6.193521833 | 0           | 5.12646323  |        |

|                                                             |                                                        |             |             |                  |                |        |
|-------------------------------------------------------------|--------------------------------------------------------|-------------|-------------|------------------|----------------|--------|
| 0.031015864                                                 | 1                                                      | AC078881.1  | 4           | 177444979        |                |        |
| 177677126                                                   | +                                                      | 2161        | antisense   | novel transcript |                |        |
| -                                                           | 2                                                      | 7           | 10          | 0                | 0              |        |
| 0.050613916                                                 | 0.14281612                                             | 0.214361945 |             | 0                | 0              | 0      |
| ENSG0000013364                                              | 2752.411827                                            | 3243.402042 |             | 2628.322143      |                |        |
| 3044.876591                                                 | 3578.67528                                             | 4276.137234 |             | 2874.712004      |                |        |
| 3633.229702                                                 | -0.337722548                                           | 0.031061017 |             | 0.136759724      |                | MVP    |
| 16                                                          | 29820394                                               | 29848039    |             | +                | 6141           |        |
| protein_coding                                              | major vault protein [Source:HGNC Symbol;Acc:HGNC:7531] |             |             |                  |                |        |
| -                                                           | 2379                                                   | 3499        | 2688        | 3031             | 3916           | 4358   |
| 21.18605315                                                 | 25.12110872                                            | 20.27648276 |             | 23.86426459      |                |        |
| 27.7883131                                                  | 33.12791967                                            |             |             |                  |                |        |
| ENSG00000284631                                             | 2.313923351                                            | 2.780853423 |             | 1.955596832      |                |        |
| 14.06409511                                                 | 11.88017841                                            | 17.66187935 |             | 2.350124535      |                |        |
| 14.53538429                                                 | -2.626299871                                           | 0.031071846 |             | 1                | SCYGR4         | 2      |
| 227616998                                                   | 227618655                                              | +           |             | 1658             | protein_coding |        |
| small cysteine and glycine repeat containing 4 [Source:HGNC |                                                        |             |             |                  |                |        |
| Symbol;Acc:HGNC:34223]                                      | -                                                      | 2           | 3           | 2                | 14             | 13     |
| 18                                                          | 0.065969043                                            | 0.079775712 |             | 0.05587891       |                |        |
| 0.408267422                                                 | 0.341678321                                            | 0.506796976 |             |                  |                |        |
| ENSG00000122641                                             | 652.5263851                                            | 553.3898311 |             | 559.300694       |                |        |
| 329.5016568                                                 | 509.0199517                                            | 439.5845527 |             | 588.4056367      |                |        |
| 426.0353871                                                 | 0.46466793                                             | 0.031080205 |             | 0.136804808      |                | INHBA  |
| 7                                                           | 41667168                                               | 41705834    |             | -                | 8302           |        |
| protein_coding                                              | inhibin subunit beta A [Source:HGNC                    |             |             |                  |                |        |
| Symbol;Acc:HGNC:6066]                                       | -                                                      | 564         | 597         | 572              | 328            | 557    |
| 448                                                         | 3.715276048                                            | 3.170483958 |             | 3.191653641      |                |        |
| 1.910259337                                                 | 2.92368826                                             | 2.519076293 |             |                  |                |        |
| ENSG00000155093                                             | 536.8302175                                            | 601.5912904 |             | 616.0130022      |                |        |
| 444.0235741                                                 | 406.6676454                                            | 473.9270959 |             | 584.8115034      |                |        |
| 441.5394385                                                 | 0.406180758                                            | 0.031138167 |             | 0.137020485      |                | PTPRN2 |
| 7                                                           | 157539056                                              | 158587788   |             | -                | 4833           |        |
| protein_coding                                              | "protein tyrosine phosphatase, receptor type N2        |             |             |                  |                |        |
| [Source:HGNC Symbol;Acc:HGNC:9677]"                         | -                                                      |             |             | 464              | 649            | 630    |
| 442                                                         | 445                                                    | 483         | 5.250442397 | 5.920547362      |                |        |
| 6.038460227                                                 | 4.421877333                                            | 4.012377751 |             | 4.665265575      |                |        |
| ENSG00000119314                                             | 2501.351143                                            | 2017.972634 |             | 2101.288796      |                |        |
| 1597.279373                                                 | 2064.409463                                            | 1524.808917 |             | 2206.870858      |                |        |
| 1728.832584                                                 | 0.351667709                                            | 0.03116308  |             | 0.13709065       |                | PTBP3  |
| 9                                                           | 112217716                                              | 112333667   |             | -                | 8239           |        |
| protein_coding                                              | polypyrimidine tract binding protein 3 [Source:HGNC    |             |             |                  |                |        |
| Symbol;Acc:HGNC:10253]                                      | -                                                      | 2162        | 2177        | 2149             | 1590           | 2259   |
| 1554                                                        | 14.35079298                                            | 11.6497843  |             | 12.08271046      |                |        |
| 9.330906507                                                 | 11.94814064                                            | 8.804861875 |             |                  |                |        |
| ENSG00000220091                                             | 0                                                      | 0           | 0.977798416 | 3.013734666      |                |        |
| 9.138598774                                                 | 11.77458623                                            | 0.325932805 |             |                  |                |        |
| 7.975639891                                                 | -4.454322068                                           | 0.031183155 |             | 1                | LAP3P1         | 6      |
| 82924829                                                    | 82925122                                               | -           |             | 294              |                |        |
| processed_pseudogene                                        | leucine aminopeptidase 3 pseudogene 1                  |             |             |                  |                |        |
| [Source:HGNC Symbol;Acc:HGNC:42364]                         | -                                                      |             |             | 0                | 0              | 1      |

|                                    |                                              |             |             |                  |             |                |  |
|------------------------------------|----------------------------------------------|-------------|-------------|------------------|-------------|----------------|--|
| 0.49337273                         | 3                                            | 10          | 12          | 0                | 0           | 0.157563321    |  |
| ENSG00000129493                    | 451.2150535                                  | 1.482215216 | 1.905372757 | 321.6520459      | 316.8066868 |                |  |
| 275.2544328                        | 249.4837465                                  |             |             | 231.5668626      | 363.2245954 |                |  |
| 252.1016807                        | 0.525446192                                  |             |             | 0.031192151      | 0.137179059 |                |  |
| HEATR5A                            | 14                                           | 31291791    | 31420582    | -                | 10243       |                |  |
| protein_coding                     | HEAT repeat containing 5A [Source:HGNC       |             |             |                  |             |                |  |
| Symbol;Acc:HGNC:20276]             | -                                            | 390         | 347         | 324              | 274         | 273            |  |
| 236                                | 2.08224653                                   | 1.493606724 | 1.465278891 |                  |             |                |  |
| 1.29337543                         | 1.161432761                                  | 1.075550648 |             |                  |             |                |  |
| ENSG00000242125                    | 1184.728756                                  | 1251.38404  | 1358.162    |                  |             |                |  |
| 1127.136765                        | 892.8411002                                  | 967.4785022 | 1264.758265 |                  |             |                |  |
| 995.8187892                        | 0.345388865                                  | 0.031227112 | 0.137293314 |                  |             | SNHG3          |  |
| 1                                  | 28505980                                     | 28510892    | +           | 4088             |             |                |  |
| processed_transcript               | small nucleolar RNA host gene 3 [Source:HGNC |             |             |                  |             |                |  |
| Symbol;Acc:HGNC:10118]             | -                                            | 1024        | 1350        | 1389             | 1122        | 977            |  |
| 986                                | 13.69883965                                  | 14.55984794 | 15.73960447 |                  |             |                |  |
| 13.27037472                        | 10.41459233                                  | 11.25931744 |             |                  |             |                |  |
| ENSG00000249669                    | 11.56961676                                  | 13.90426711 | 24.4449604  | 0                |             |                |  |
| 0                                  | 5.887293117                                  | 16.63961476 | 1.962431039 |                  |             |                |  |
| 3.091488599                        | 0.031252137                                  | 1           | CARMN       | 5                | 149406689   |                |  |
| 149432835                          | +                                            | 17988       | lincRNA     | cardiac mesoderm |             |                |  |
| enhancer-associated non-coding RNA | [Source:HGNC                                 |             |             |                  |             |                |  |
| Symbol;Acc:HGNC:42872]             | -                                            | 10          | 15          | 25               | 0           | 0              |  |
| 6                                  | 0.030402678                                  | 0.036765658 | 0.064381277 | 0                |             |                |  |
| 0                                  | 0.015570925                                  |             |             |                  |             |                |  |
| ENSG00000120948                    | 3215.196497                                  | 2656.64197  | 2863.971561 |                  |             |                |  |
| 2526.514228                        | 2409.848497                                  | 2160.636574 | 2911.936676 |                  |             |                |  |
| 2365.666433                        | 0.299462628                                  | 0.031256772 | 0.13737112  |                  |             | TARDBP         |  |
| 1                                  | 11012344                                     | 11026420    | +           | 6071             |             |                |  |
| protein_coding                     | TAR DNA binding protein [Source:HGNC         |             |             |                  |             |                |  |
| Symbol;Acc:HGNC:11571]             | -                                            | 2779        | 2866        | 2929             | 2515        | 2637           |  |
| 2202                               | 25.03358375                                  | 20.81372974 | 22.34918007 |                  |             |                |  |
| 20.02990885                        | 18.9281642                                   | 16.93179952 |             |                  |             |                |  |
| ENSG00000005073                    | 32.39492692                                  | 31.51633879 | 31.28954932 | 0                |             |                |  |
| 12.79403828                        | 9.812155195                                  | 31.73360501 | 7.535397826 |                  |             |                |  |
| 2.067877863                        | 0.031262781                                  | 0.13737112  | HOXA11      | 7                |             |                |  |
| 27181510                           | 27185223                                     | -           | 2307        | protein_coding   |             |                |  |
| homeobox A11                       | [Source:HGNC Symbol;Acc:HGNC:5101] Homeobox  |             |             |                  |             |                |  |
| 28                                 | 34                                           | 32          | 0           | 14               | 10          | 0.663750941    |  |
| 0.649778415                        | 0.64254691                                   | 0           | 0.26444724  |                  |             |                |  |
| 0.202347779                        |                                              |             |             |                  |             |                |  |
| ENSG00000197646                    | 264.9442237                                  | 324.4328993 | 158.4033434 |                  |             |                |  |
| 347.5840648                        | 393.8736072                                  | 387.5801302 | 249.2601555 |                  |             |                |  |
| 376.3459341                        | -0.594374957                                 | 0.031280438 | 0.137409213 |                  |             |                |  |
| PDCD1LG2                           | 9                                            | 5510570     | 5571254     | +                | 2365        | protein_coding |  |
| programmed cell death 1 ligand 2   | [Source:HGNC                                 |             |             |                  |             |                |  |
| Symbol;Acc:HGNC:18731]             | -                                            | 229         | 350         | 162              | 346         | 431            |  |
| 395                                | 5.295403401                                  | 6.524854885 | 3.17311875  |                  |             |                |  |
| 7.073692394                        | 7.941539911                                  | 7.796720871 |             |                  |             |                |  |

|                 |                                                                                                          |             |             |      |                      |             |
|-----------------|----------------------------------------------------------------------------------------------------------|-------------|-------------|------|----------------------|-------------|
| ENSG00000128591 | 4287.69997                                                                                               |             | 3868.167111 |      | 4949.615583          |             |
| 3043.872013     | 2474.732548                                                                                              |             | 4385.052157 |      | 4368.494221          |             |
| 3301.218906     | 0.404212338                                                                                              |             | 0.031310238 |      | 0.137500606          | FLNC        |
| 7               | 128830377                                                                                                |             | 128859274   | +    | 9280                 |             |
| protein_coding  | filamin C [Source:HGNC Symbol;Acc:HGNC:3756]                                                             |             |             |      |                      | -           |
| 3706            | 4173                                                                                                     | 5062        | 3030        | 2708 | 4469                 | 21.83997573 |
|                 | 19.82596643                                                                                              | 25.26833467 | 15.78686404 |      |                      | 12.71625656 |
|                 | 22.48062671                                                                                              |             |             |      |                      |             |
| ENSG00000089159 | 2017.741162                                                                                              |             | 3114.555833 |      | 2747.613549          |             |
| 3396.478969     | 3344.727151                                                                                              |             | 3297.865361 |      | 2626.636848          |             |
| 3346.35716      | -0.34888077                                                                                              |             | 0.031321735 |      | 0.13751159           | PXN         |
| 12              | 120210439                                                                                                |             | 120265771   | -    | 7460                 |             |
| protein_coding  | paxillin [Source:HGNC Symbol;Acc:HGNC:9718]                                                              |             |             |      |                      | -           |
| 1744            | 3360                                                                                                     | 2810        | 3381        | 3660 | 3361                 | 12.78504809 |
|                 | 19.85794977                                                                                              | 17.44897612 | 21.91328867 |      |                      | 21.37966302 |
|                 | 21.03176502                                                                                              |             |             |      |                      |             |
| ENSG00000106355 | 1635.943809                                                                                              |             | 1319.051473 |      | 1476.475608          |             |
| 1205.493866     | 1211.778197                                                                                              |             | 1116.623261 |      | 1477.156964          |             |
| 1177.965108     | 0.32600412                                                                                               |             | 0.031346608 |      | 0.137581281          | LSM5        |
| 7               | 32485332                                                                                                 |             | 32495283    | -    | 4701                 |             |
| protein_coding  | "LSM5 homolog, U6 small nuclear RNA and mRNA degradation associated [Source:HGNC Symbol;Acc:HGNC:17162]" |             |             |      |                      | -           |
| 1414            | 1423                                                                                                     | 1510        | 1200        | 1326 | 1138                 | 16.44954429 |
|                 | 13.34592276                                                                                              | 14.87952789 | 12.34218953 |      |                      | 12.2916977  |
|                 | 11.30051007                                                                                              |             |             |      |                      |             |
| ENSG00000107282 | 173.5442514                                                                                              |             | 188.1710816 |      | 179.9149086          |             |
| 257.1720248     | 265.9332243                                                                                              |             | 261.9845437 |      | 180.5434138          |             |
| 261.6965976     | -0.535083766                                                                                             |             | 0.031441386 |      | 0.137957654          | APBA1       |
| 9               | 69427530                                                                                                 |             | 69672306    | -    | 11384                |             |
| protein_coding  | amyloid beta precursor protein binding family A member 1 [Source:HGNC Symbol;Acc:HGNC:578]               |             |             |      |                      | -           |
| 256             | 291                                                                                                      | 267         | 0.720594735 |      | 0.786203746          | 184         |
|                 | 0.748730271                                                                                              | 1.087292256 | 1.11392692  |      | 1.094869632          |             |
| ENSG00000157326 | 149.2480562                                                                                              |             | 202.0753487 |      | 152.5365529          |             |
| 220.0026306     | 231.206549                                                                                               |             | 320.8574749 |      | 167.9533193          |             |
| 257.3555515     | -0.614146298                                                                                             |             | 0.031450639 |      | 0.137958656          | DHRS4       |
| 14              | 23953586                                                                                                 |             | 23969279    | +    | 2305                 |             |
| protein_coding  | dehydrogenase/reductase 4 [Source:HGNC Symbol;Acc:HGNC:16985]                                            |             |             |      |                      | -           |
| 327             | 3.060648763                                                                                              |             | 4.169841256 |      | 3.135134119          | 253         |
|                 | 4.593824521                                                                                              | 4.783085996 | 6.622513599 |      |                      |             |
| ENSG00000226284 | 25.45315687                                                                                              |             | 4.634755704 |      | 22.48936357          | 0           |
|                 | 3.65543951                                                                                               | 3.924862078 | 17.52575871 |      | 2.526767196          |             |
|                 | 2.783612234                                                                                              | 0.031451602 | 1           |      | ARPC3P1 20           |             |
| 49134480        | 49135012                                                                                                 |             | 533         | +    | processed_pseudogene |             |
|                 | actin related protein 2/3 complex subunit 3 pseudogene 1 [Source:HGNC Symbol;Acc:HGNC:16092]             |             |             |      |                      | -           |
| 0               | 4                                                                                                        | 4           | 2.257304693 |      | 0.413596403          | 23          |
|                 | 1.998955301                                                                                              | 0           | 0.327032851 |      | 0.350331201          |             |
| ENSG00000162039 | 0                                                                                                        | 0           | 2.933395248 |      | 31.14192488          |             |



|                          |                                                    |             |             |                   |             |             |
|--------------------------|----------------------------------------------------|-------------|-------------|-------------------|-------------|-------------|
| 1.827719755              | 6.868508636                                        | 0.977798416 |             |                   |             |             |
| 13.27938442              | -3.739981548                                       | 0.031457868 | 1           | MEIOB             | 16          |             |
| 1833987                  | 1884294                                            | -           | 2303        | protein_coding    | meiosis     |             |
| specific with OB domains | [Source:HGNC Symbol;Acc:HGNC:28569]                |             |             |                   |             | -           |
| 0                        | 0                                                  | 3           | 31          | 2                 | 7           | 0           |
| 0.060343399              | 0.650832111                                        | 0.037843793 | 0.141889461 |                   |             |             |
| ENSG00000238269          | 0                                                  | 0           | 0           | 28.12819022       | 0           | 0           |
| 0                        | 9.376063406                                        | -5.64733261 | 0.031463326 |                   |             | 1           |
| PAGE2B                   | X                                                  | 55075063    | 55078909    | +                 |             | 507         |
| protein_coding           | PAGE family member 2B [Source:HGNC                 |             |             |                   |             |             |
| Symbol;Acc:HGNC:31805]   | -                                                  | 0           | 0           | 0                 | 28          | 0           |
| 0                        | 0                                                  | 0           | 0           | 2.670246094       | 0           | 0           |
| ENSG00000077254          | 2367.143589                                        | 2108.813845 | 2193.201847 |                   |             |             |
| 1770.066827              | 1866.10187                                         | 1839.779099 | 2223.053094 |                   |             |             |
| 1825.315932              | 0.284105048                                        | 0.031547891 | 0.138318853 |                   |             | USP33       |
| 1                        | 77695987                                           | 77759852    | -           | 6918              |             |             |
| protein_coding           | ubiquitin specific peptidase 33 [Source:HGNC       |             |             |                   |             |             |
| Symbol;Acc:HGNC:20059]   | -                                                  | 2046        | 2275        | 2243              | 1762        | 2042        |
| 1875                     | 16.17408736                                        | 14.49889155 | 15.01935117 |                   |             |             |
| 12.31477731              | 12.86274849                                        | 12.65222045 |             |                   |             |             |
| ENSG00000135723          | 2623.989081                                        | 2487.009911 | 2933.395248 |                   |             |             |
| 2329.616897              | 1951.090838                                        | 2245.021109 | 2681.464747 |                   |             |             |
| 2175.242948              | 0.301979797                                        | 0.03155085  | 0.138318853 |                   |             | FHOD1       |
| 16                       | 67229387                                           | 67247658    | -           | 5407              |             |             |
| protein_coding           | formin homology 2 domain containing 1 [Source:HGNC |             |             |                   |             |             |
| Symbol;Acc:HGNC:17905]   | -                                                  | 2268        | 2683        | 3000              | 2319        | 2135        |
| 2288                     | 22.93936509                                        | 21.87752864 | 25.70202496 |                   |             |             |
| 20.73698414              | 17.20679987                                        | 19.75357412 |             |                   |             |             |
| ENSG00000155876          | 1601.234959                                        | 1822.385943 | 1617.27858  |                   |             |             |
| 2047.330416              | 2148.484572                                        | 1984.01778  | 1680.299827 |                   |             |             |
| 2059.944256              | -0.293670658                                       | 0.031627261 | 0.138614089 |                   |             | RRAGA       |
| 9                        | 19049395                                           | 19050983    | +           | 1589              |             |             |
| protein_coding           | Ras related GTP binding A [Source:HGNC             |             |             |                   |             |             |
| Symbol;Acc:HGNC:16963]   | -                                                  | 1384        | 1966        | 1654              | 2038        | 2351        |
| 2022                     | 47.63288711                                        | 54.5498517  | 48.21854083 |                   |             |             |
| 62.01282255              | 64.47440303                                        | 59.40230398 |             |                   |             |             |
| ENSG00000259933          | 6.941770054                                        | 8.342560268 | 14.66697624 |                   |             | 0           |
| 0                        | 1.962431039                                        | 9.983768855 | 0.65414368  |                   |             |             |
| 3.944078143              | 0.031704095                                        | 1           | AC009065.2  | 16                |             |             |
| 2091436                  | 2095433                                            | +           | 691         | sense_overlapping |             |             |
| uncharacterized          | LOC105371049 [Source:NCBI gene;Acc:105371049]      |             |             |                   |             | -           |
| 6                        | 9                                                  | 15          | 0           | 0                 | 2           | 0.474862545 |
| 0.574246584              | 1.005577778                                        | 0           | 0           | 0                 | 0.135113264 |             |
| ENSG00000258858          | 0                                                  | 0           | 1.955596832 | 15.06867333       |             |             |
| 2.741579632              | 13.73701727                                        | 0.651865611 |             |                   |             |             |
| 10.51575675              | -3.983991159                                       | 0.031727494 | 1           | AL583722.4        |             |             |
| 14                       | 104690091                                          | 104691284   | -           | 716               |             |             |
| antisense                | "novel transcript, antisense to INF2"              |             |             |                   |             | -           |
| 0                        | 2                                                  | 15          | 3           | 14                | 0           | 0           |
| 0.12939576               | 1.012930045                                        | 0.182585729 | 0.912769352 |                   |             |             |

|                                                        |                                                      |             |             |             |
|--------------------------------------------------------|------------------------------------------------------|-------------|-------------|-------------|
| ENSG00000182667                                        | 1442.73121                                           | 1354.275617 | 1335.672636 |             |
| 921.1982296                                            | 1138.669407                                          | 1200.02658  | 1377.559821 |             |
| 1086.631406                                            | 0.341909911                                          | 0.031728749 | 0.139019026 | NTM         |
| 11                                                     | 131370478                                            | 132336822   | + 6956      |             |
| protein_coding                                         | neurotrimin [Source:HGNC Symbol;Acc:HGNC:17941] -    |             |             |             |
| 1247                                                   | 1461                                                 | 1366        | 917         | 1246        |
| 9.260290279                                            | 9.096903376                                          | 6.373984145 | 7.805793658 |             |
| 8.207538329                                            |                                                      |             |             |             |
| ENSG00000094804                                        | 2326.64993                                           | 2097.690432 | 1972.219405 |             |
| 1848.423929                                            | 1722.625869                                          | 1617.043176 | 2132.186589 |             |
| 1729.364325                                            | 0.301856145                                          | 0.031746494 | 0.139056919 | CDC6        |
| 17                                                     | 40287633                                             | 40304657    | + 5557      |             |
| protein_coding                                         | cell division cycle 6 [Source:HGNC                   |             |             |             |
| Symbol;Acc:HGNC:1744]                                  | -                                                    | 2011        | 2263        | 2017        |
| 1648                                                   | 19.79093838                                          | 17.95469843 | 16.81388053 | 1885        |
| 16.00953223                                            | 14.78187602                                          | 13.84404003 |             |             |
| ENSG00000176678                                        | 1222.908491                                          | 1348.71391  | 1772.748529 |             |
| 1139.191704                                            | 1094.804133                                          | 1135.266356 | 1448.123643 |             |
| 1123.087398                                            | 0.367139224                                          | 0.031815611 | 0.139319747 | FOX11       |
| 16                                                     | 86576368                                             | 86582160    | + 3742      |             |
| protein_coding                                         | forkhead box L1 [Source:HGNC Symbol;Acc:HGNC:3817]   |             |             |             |
| Fork                                                   | 1057                                                 | 1455        | 1813        | 1134        |
| 15.44777435                                            | 17.14325038                                          | 22.44380448 | 14.65245809 |             |
| 13.95120218                                            | 14.43363144                                          |             |             |             |
| ENSG00000100083                                        | 1092.171822                                          | 1571.182184 | 1348.384016 |             |
| 1875.547541                                            | 1577.322148                                          | 1700.446495 | 1337.246007 |             |
| 1717.772061                                            | -0.360434743                                         | 0.031831514 | 0.139349473 | GGA1        |
| 22                                                     | 37608475                                             | 37633564    | + 9369      |             |
| protein_coding                                         | "golgi associated, gamma adaptin ear containing, ARF |             |             |             |
| binding protein 1 [Source:HGNC Symbol;Acc:HGNC:17842]" | -                                                    |             |             | 944         |
| 1695                                                   | 1379                                                 | 1867        | 1726        | 1733        |
| 7.976464223                                            | 6.818258821                                          | 9.63501279  | 8.027977566 |             |
| 8.634781644                                            |                                                      |             |             |             |
| ENSG00000141556                                        | 2282.685386                                          | 2454.566621 | 2772.05851  |             |
| 1906.689465                                            | 1843.255373                                          | 2278.382436 | 2503.103506 |             |
| 2009.442425                                            | 0.317169475                                          | 0.03187349  | 0.139493283 | TBCD        |
| 17                                                     | 82752064                                             | 82945922    | + 13546     |             |
| protein_coding                                         | tubulin folding cofactor D [Source:HGNC              |             |             |             |
| Symbol;Acc:HGNC:11581]                                 | -                                                    | 1973        | 2648        | 2835        |
| 2322                                                   | 7.965457536                                          | 8.618682207 | 9.694924867 | 1898        |
| 6.774642048                                            | 6.488636193                                          | 8.001974811 |             | 2017        |
| ENSG00000245904                                        | 0                                                    | 0.926951141 | 0           | 11.05036044 |
| 6.397019142                                            | 5.887293117                                          | 0.308983714 |             |             |
| 7.778224234                                            | -4.416842119                                         | 0.031973037 | 1           | AC025164.1  |
| 12                                                     | 92145573                                             | 92189660    | + 7589      |             |
| antisense                                              | uncharacterized LOC101928617 [Source:NCBI            |             |             |             |
| gene;Acc:101928617]                                    | -                                                    | 0           | 1           | 0           |
| 6                                                      | 0                                                    | 0.005809642 | 0           | 0.070082462 |
| 0.040195005                                            | 0.036907339                                          |             |             |             |
| ENSG00000183604                                        | 98.34174244                                          | 59.32487301 | 59.64570339 |             |

|                                    |                                      |                          |                           |        |
|------------------------------------|--------------------------------------|--------------------------|---------------------------|--------|
| 151.6913115                        | 112.4047649                          | 120.6895089              | 72.43743961               |        |
| 128.2618618                        | -0.82820708                          | 0.031985341              | 0.139907658               | SMG1P5 |
| 16                                 | 30267553                             | 30335374                 | - 4791                    |        |
| transcribed_unprocessed_pseudogene |                                      | SMG1                     | pseudogene 5 [Source:HGNC |        |
| Symbol;Acc:HGNC:49862]             | -                                    | 85 64                    | 61 151                    | 123    |
| 123                                | 0.970258526                          | 0.588962659              | 0.589801836               |        |
| 1.523884294                        | 1.118761566                          | 1.198463954              |                           |        |
| ENSG00000157224                    | 1458.928673                          | 1308.855011              | 1104.91221                |        |
| 1726.869964                        | 1724.453589                          | 1462.99234               | 1290.898631               |        |
| 1638.105297                        | -0.34413876                          | 0.031986476              | 0.139907658               | CLDN12 |
| 7                                  | 90383721                             | 90513402                 | + 6741                    |        |
| protein_coding                     | claudin 12 [Source:HGNC              | Symbol;Acc:HGNC:2034]    | -                         |        |
| 1261                               | 1412 1130                            | 1719 1887                | 1491 10.23023175          |        |
| 9.235157948                        | 7.765270202                          | 12.32970728              | 12.1984927                |        |
| 10.32522091                        |                                      |                          |                           |        |
| ENSG00000149782                    | 1060.933857                          | 1440.482073              | 1510.698553               |        |
| 851.8823323                        | 1010.729024                          | 1177.458623              | 1337.371494               |        |
| 1013.35666                         | 0.400777166                          | 0.032003532              | 0.139942219               | PLCB3  |
| 11                                 | 64251523                             | 64269150                 | + 4964                    |        |
| protein_coding                     | phospholipase C beta 3 [Source:HGNC  |                          |                           |        |
| Symbol;Acc:HGNC:9056]              | -                                    | 917 1554                 | 1545 848                  | 1106   |
| 1200                               | 10.10257947                          | 13.8023552               | 14.41780564               |        |
| 8.259719443                        | 9.70916657                           | 11.28484268              |                           |        |
| ENSG00000039523                    | 1467.027405                          | 1839.071063              | 2274.359116               |        |
| 1249.695308                        | 1379.014555                          | 1630.780193              | 1860.152528               |        |
| 1419.830019                        | 0.390094518                          | 0.03202939               | 0.140015238               | RIPOR1 |
| 16                                 | 67518418                             | 67546788                 | + 6729                    |        |
| protein_coding                     | RHO family interacting cell          | polarization regulator 1 |                           |        |
| [Source:HGNC                       | Symbol;Acc:HGNC:25836]               | -                        | 1268 1984                 | 2326   |
| 1244                               | 1509 1662                            | 10.30536641              | 12.99945358               |        |
| 16.012592                          | 8.938632219                          | 9.772311662              | 11.52992619               |        |
| ENSG00000144579                    | 1042.42247                           | 1047.454789              | 1116.645791               |        |
| 1300.928798                        | 1270.26523                           | 1413.931564              | 1068.841017               |        |
| 1328.375197                        | -0.313459161                         | 0.032064423              | 0.140128313               | CTDSP1 |
| 2                                  | 218398256                            | 218405941                | + 4727                    |        |
| protein_coding                     | CTD small phosphatase 1 [Source:HGNC |                          |                           |        |
| Symbol;Acc:HGNC:21614]             | -                                    | 901 1130                 | 1142 1295                 | 1390   |
| 1441                               | 10.42398797                          | 10.53966481              | 11.19136235               |        |
| 13.24601927                        | 12.81409076                          | 14.23063941              |                           |        |
| ENSG00000120217                    | 329.7340776                          | 335.556313               | 182.8483038               |        |
| 453.0647781                        | 498.0536332                          | 327.7259835              | 282.7128981               |        |
| 426.2814649                        | -0.593283574                         | 0.032094244              | 0.140197928               | CD274  |
| 9                                  | 5450503 5470566                      | + 4108                   | protein_coding            | CD274  |
| molecule [Source:HGNC              | Symbol;Acc:HGNC:17635]               | -                        | 285 362                   |        |
| 187                                | 451 545                              | 334 3.794103185          | 3.885188491               |        |
| 2.108694316                        | 5.30820056                           | 5.781288804              | 3.795439453               |        |
| ENSG00000268912                    | 155.0328645                          | 156.6547428              | 121.2470036               |        |
| 259.1811813                        | 264.1055046                          | 159.9381297              | 144.311537                |        |
| 227.7416052                        | -0.658871942                         | 0.032098695              | 0.140197928               |        |
| AC012313.5                         | 19 58428632                          | 58431148                 | -                         | 2517   |

|                                                                                       |                |                                      |             |                     |
|---------------------------------------------------------------------------------------|----------------|--------------------------------------|-------------|---------------------|
| lincRNA novel transcript                                                              | -              | 134                                  | 169         | 124                 |
| 258                                                                                   | 289            | 163                                  | 2.911496655 | 2.960311737         |
| 2.282132866                                                                           | 4.95607314     |                                      | 5.003492175 | 3.023085461         |
| ENSG00000173376                                                                       | 16.19746346    | 0                                    | 5.866790497 | 0                   |
| 0                                                                                     | 7.354751319    | 0                                    | 5.366708897 | 0.032149278         |
| 1                                                                                     | NDNF           | 4                                    | 121035613   | 121073021           |
| 3556                                                                                  | protein_coding | neuron derived neurotrophic factor   |             |                     |
| [Source:HGNC Symbol;Acc:HGNC:26256]                                                   | -              | 14                                   | 0           | 6                   |
| 0                                                                                     | 0              | 0                                    | 0.215308411 | 0                   |
| 0                                                                                     | 0              | 0                                    |             | 0.078161332         |
| ENSG00000103415                                                                       | 565.7542594    | 668.3317726                          | 682.5032945 |                     |
| 929.2348554                                                                           | 700.0166661    | 897.8122003                          | 638.8631088 |                     |
| 842.3545739                                                                           | -0.397918775   | 0.032155159                          | 0.140404432 | HMOX2               |
| 16                                                                                    | 4474690        | 4510347                              | +           | 3793                |
| oxygenase 2 [Source:HGNC Symbol;Acc:HGNC:5014]                                        | -              | 489                                  | 721         | protein_coding heme |
| 698                                                                                   | 925            | 766                                  | 915         | 7.050513186         |
| 8.524620139                                                                           | 11.79125703    | 8.800442803                          | 11.26119003 |                     |
| ENSG00000184675                                                                       | 389.8960847    | 528.3621503                          | 446.8538762 |                     |
| 799.6442647                                                                           | 497.1397733    | 610.3160531                          | 455.0373704 |                     |
| 635.7000304                                                                           | -0.48095405    | 0.032197149                          | 0.140547633 | AMER1               |
| X                                                                                     | 64185117       | 64205744                             | -           | 8443                |
| protein_coding APC membrane recruitment protein 1 [Source:HGNC Symbol;Acc:HGNC:26837] | -              | 337                                  | 570         | 457                 |
| 622                                                                                   | 2.182869759    | 2.976542064                          | 2.507389868 | 796                 |
| 4.558453143                                                                           | 2.80776469     | 3.439059037                          |             | 544                 |
| ENSG00000225311                                                                       | 4.627846703    | 5.561706845                          | 7.822387329 | 0                   |
| 0                                                                                     | 0              | 6.003980292                          | 0           | 5.079765078         |
| 0.032316244                                                                           | 1              | AL024474.2                           | 6           | 144311699           |
| 144333301                                                                             | -              | 501                                  | antisense   | "novel transcript,  |
| antisense to UTRN"                                                                    | -              | 4                                    | 6           | 8                   |
| 0                                                                                     | 0.436633425    | 0.528016486                          | 0.739698464 | 0                   |
| 0                                                                                     | 0              |                                      |             |                     |
| ENSG00000197134                                                                       | 134.2075544    | 113.0880392                          | 88.97965587 |                     |
| 90.41203998                                                                           | 43.86527412    | 38.26740526                          | 112.0917498 |                     |
| 57.51490645                                                                           | 0.96326309     | 0.032329807                          | 0.141071866 | ZNF257              |
| 19                                                                                    | 22052452       | 22091480                             | +           | 5029                |
| protein_coding zinc finger protein 257 [Source:HGNC Symbol;Acc:HGNC:13498]            | zf-C2H2        | 116                                  | 122         | 91                  |
| 39                                                                                    | 1.261452978    | 1.069577241                          | 0.838228094 | 90                  |
| 0.865290808                                                                           | 0.41592804     | 0.362017035                          |             | 48                  |
| ENSG00000099954                                                                       | 0              | 14.83121825                          | 6.844588913 | 0                   |
| 0                                                                                     | 7.225269056    | 0                                    | 5.350253705 | 0.032340148         |
| 1                                                                                     | CECR2          | 22                                   | 17359949    | 17558149            |
| 10759                                                                                 | protein_coding | "CECR2, histone acetyl-lysine reader |             |                     |
| [Source:HGNC Symbol;Acc:HGNC:1840]"                                                   | -              | 0                                    | 16          | 7                   |
| 0                                                                                     | 0              | 0                                    | 0.065566505 | 0.030138983         |
| 0                                                                                     | 0              | 0                                    |             |                     |
| ENSG00000256628                                                                       | 38.1797353     | 46.34755704                          | 67.46809072 |                     |
| 93.42577465                                                                           | 113.3186248    | 83.40331915                          | 50.66512769 |                     |
| 96.7159062                                                                            | -0.930606809   | 0.032343871                          | 0.141071866 |                     |

|                                    |              |                                                 |             |             |             |
|------------------------------------|--------------|-------------------------------------------------|-------------|-------------|-------------|
| ZBTB11-AS1                         | 3            | 101676475                                       | 101679217   | +           | 2743        |
| antisense                          |              | ZBTB11 antisense RNA 1 [Source:HGNC             |             |             |             |
| Symbol;Acc:HGNC:48573]             | -            | 33                                              | 50          | 69          | 93          |
| 85                                 | 0.65793478   | 0.803670736                                     | 1.165267782 |             | 124         |
| 1.639299693                        | 1.969946698  | 1.446569                                        |             |             |             |
| ENSG00000185596                    | 244.1189136  | 286.4279025                                     | 222.9380389 |             |             |
| 419.9136968                        | 405.7537856  | 272.7779144                                     | 251.1616183 |             |             |
| 366.1484656                        | -0.543429321 | 0.032353846                                     | 0.141071866 |             | WASH3P      |
| 15                                 | 101961603    | 101976543                                       | +           | 2351        |             |
| transcribed_unprocessed_pseudogene |              | "WAS protein family homolog 3,                  |             |             |             |
| pseudogene [Source:HGNC            |              | Symbol;Acc:HGNC:24362]"                         | -           | 211         | 309         |
| 228                                | 418          | 444                                             | 278         | 4.908225856 | 5.794818104 |
| 4.492464704                        | 8.596563374  | 8.229793511                                     | 5.519988877 |             |             |
| ENSG00000151388                    | 731.1997791  | 554.3167822                                     | 631.6577768 |             |             |
| 511.330315                         | 456.0160788  | 474.9083114                                     | 639.0581127 |             |             |
| 480.7515684                        | 0.409908796  | 0.032358295                                     | 0.141071866 |             |             |
| ADAMTS12                           | 5            | 33523535                                        | 33892192    | -           | 9778        |
| protein_coding                     |              | ADAM metalloproteinase with thrombospondin type |             |             |             |
| 1 motif 12 [Source:HGNC            |              | Symbol;Acc:HGNC:14605]                          | -           | 632         | 598         |
| 646                                | 509          | 499                                             | 484         | 3.534774864 | 2.696404908 |
| 3.060447549                        | 2.516917416  | 2.223868536                                     | 2.310688296 |             |             |
| ENSG0000010319                     | 27.76708022  | 29.66243651                                     | 56.71230814 |             |             |
| 7.032047554                        | 18.27719755  | 12.75580175                                     | 38.04727495 |             |             |
| 12.68834895                        | 1.581916925  | 0.032363383                                     | 0.141071866 |             | SEMA3G      |
| 3                                  | 52433053     | 52445085                                        | -           | 5011        |             |
| protein_coding                     |              | semaphorin 3G [Source:HGNC                      |             |             |             |
| Symbol;Acc:HGNC:30400]             |              | Symbol;Acc:HGNC:30400]                          |             |             |             |
| -                                  | 24           | 32                                              | 58          | 7           | 20          |
| 0.261927774                        | 0.281552594  | 0.536174366                                     | 0.067542146 |             |             |
| 0.173925872                        | 0.121105812  |                                                 |             |             |             |
| ENSG00000180855                    | 40.49365865  | 63.03267758                                     | 66.4902923  |             |             |
| 65.29758443                        | 115.1463446  | 151.10719                                       | 56.67220951 |             |             |
| 110.5170397                        | -0.9607576   | 0.032401732                                     | 0.141198768 |             | ZNF443      |
| 19                                 | 12429707     | 12441112                                        | -           | 2753        |             |
| protein_coding                     |              | zinc finger protein 443 [Source:HGNC            |             |             |             |
| Symbol;Acc:HGNC:20878]             |              | zf-C2H2 35                                      | 68          | 68          | 65          |
| 154                                | 0.695274891  | 1.089022015                                     | 1.144208467 |             | 126         |
| 1.141585284                        | 1.994448982  | 2.611322707                                     |             |             |             |
| ENSG00000112357                    | 86.77212568  | 134.4079154                                     | 80.17947013 |             |             |
| 141.6455293                        | 214.7570712  | 153.069621                                      | 100.4531704 |             |             |
| 169.8240738                        | -0.75606588  | 0.03248274                                      | 0.141489052 |             | PEX7        |
| 6                                  | 136822564    | 136913937                                       | +           | 1835        |             |
| protein_coding                     |              | peroxisomal biogenesis factor 7 [Source:HGNC    |             |             |             |
| Symbol;Acc:HGNC:8860]              |              | -                                               | 75          | 145         | 82          |
| 156                                | 2.23521811   | 3.483901692                                     | 2.070047159 |             | 235         |
| 3.715217644                        | 5.580722032  | 3.968574757                                     |             |             |             |
| ENSG00000270872                    | 163.1315963  | 138.11572                                       | 185.7816991 |             |             |
| 105.4807133                        | 103.2661661  | 94.19668987                                     | 162.3430051 |             |             |
| 100.9811898                        | 0.684576411  | 0.032486856                                     | 0.141489052 |             |             |
| SRGAP2D 1                          | 143975087    | 144068350                                       | +           | 1021        |             |
| unprocessed_pseudogene             |              | SLIT-R0B0 Rho GTPase activating protein 2D      |             |             |             |

|                                                                       |              |                      |                                     |             |             |
|-----------------------------------------------------------------------|--------------|----------------------|-------------------------------------|-------------|-------------|
| (pseudogene) [Source:HGNC Symbol;Acc:HGNC:43932]                      | -            | 141                  |                                     |             |             |
| 149                                                                   | 190          | 105                  | 113                                 | 96          | 7.552453905 |
| 6.434198933                                                           | 8.620457492  | 4.972385295          | 4.822933782                         |             |             |
| 4.389262219                                                           |              |                      |                                     |             |             |
| ENSG00000237818                                                       | 0            | 0                    | 0                                   | 13.05951689 | 9.138598774 |
| 0                                                                     | 0            | 7.399371887          | -5.307181005                        | 0.032504319 |             |
| 1                                                                     | RPS3AP29     | 7                    | 97898347                            | 97899115    |             |
| -                                                                     | 769          | processed_pseudogene | ribosomal protein S3a               |             |             |
| pseudogene 29 [Source:HGNC Symbol;Acc:HGNC:35531]                     | -            | 0                    |                                     |             |             |
| 0                                                                     | 0            | 13                   | 10                                  | 0           | 0           |
| 0.817369125                                                           | 0.566672657  | 0                    |                                     |             |             |
| ENSG00000270874                                                       | 0            | 0                    | 0                                   | 7.032047554 | 6.397019142 |
| 4.906077597                                                           | 0            | 6.111714764          | -5.031388565                        |             |             |
| 0.03250784                                                            | 1            | RPAP2P1              | 10                                  | 86854696    | 86856236    |
| -                                                                     | 1168         | processed_pseudogene | RNA polymerase II                   |             |             |
| associated protein 2 pseudogene 1 [Source:HGNC Symbol;Acc:HGNC:45125] | -            | 0                    | 0                                   | 7           | 7           |
| 0                                                                     | 0            | 0.289771997          | 0.261164291                         | 0.199835756 |             |
| ENSG00000230943                                                       | 9.255693406  | 0.926951141          | 8.800185745                         | 0           |             |
| 0                                                                     | 0            | 6.327610097          | 0                                   | 5.151614901 |             |
| 0.032538091                                                           | 1            | LINC02541            | 6                                   | 113616927   |             |
| 113650090                                                             | -            | 2145                 | lincRNA long intergenic non-protein |             |             |
| coding RNA 2541 [Source:HGNC Symbol;Acc:HGNC:53574]                   | -            |                      |                                     |             | 8           |
| 1                                                                     | 9            | 0                    | 0                                   | 0.203965824 |             |
| 0.020554488                                                           | 0.194364824  | 0                    | 0                                   | 0           |             |
| ENSG00000238113                                                       | 151.5619795  | 176.1207168          | 167.2035292                         |             |             |
| 237.0804604                                                           | 236.6897083  | 254.1348195          | 164.9620751                         |             |             |
| 242.6349961                                                           | -0.555560547 | 0.032555297          | 0.141746748                         |             |             |
| LINC01410                                                             | 9            | 62801461             | 62813486                            | +           | 3038        |
| lincRNA long intergenic non-protein coding RNA 1410                   |              |                      |                                     |             |             |
| [Source:HGNC Symbol;Acc:HGNC:50702]                                   | -            | 131                  | 190                                 | 171         |             |
| 236                                                                   | 259          | 259                  | 2.358186989                         | 2.757400115 |             |
| 2.607418825                                                           | 3.755998844  | 3.715100719          | 3.979770517                         |             |             |
| ENSG00000271869                                                       | 1.156961676  | 1.853902282          | 1.955596832                         |             |             |
| 21.09614266                                                           | 8.224738897  | 8.830939675          | 1.65548693                          |             |             |
| 12.71727374                                                           | -2.929735688 | 0.032617534          | 1                                   | AC026979.2  |             |
| 8                                                                     | 30155830     | 30156232             | -                                   | 403         |             |
| lincRNA novel transcript                                              | -            | 1                    | 2                                   | 2           | 21          |
| 9                                                                     | 9            | 0.135703068          | 0.218805839                         | 0.229893877 |             |
| 2.519506395                                                           | 0.973186467  | 1.042517849          |                                     |             |             |
| ENSG00000166479                                                       | 3419.978713  | 2353.528947          | 2896.238909                         |             |             |
| 2292.447503                                                           | 2198.746865  | 2386.316143          | 2889.915523                         |             |             |
| 2292.503504                                                           | 0.333735165  | 0.032632289          | 0.142031212                         |             | TMX3        |
| 18                                                                    | 68673688     | 68715298             | -                                   | 7637        |             |
| protein_coding thioredoxin related transmembrane protein 3            |              |                      |                                     |             |             |
| [Source:HGNC Symbol;Acc:HGNC:24718]                                   | -            | 2956                 | 2539                                | 2962        |             |
| 2282                                                                  | 2406         | 2432                 | 21.16783063                         | 14.65797134 |             |
| 17.9665512                                                            | 14.44754534  | 13.7287637           | 14.86574969                         |             |             |
| ENSG00000047849                                                       | 7729.660955  | 8475.114281          | 9098.414262                         |             |             |
| 7603.652562                                                           | 6000.403955  | 7136.380473          | 8434.3965                           |             |             |

|                                         |                                                     |                 |             |                      |
|-----------------------------------------|-----------------------------------------------------|-----------------|-------------|----------------------|
| 6913.478997                             | 0.286999562                                         | 0.032639213     | 0.142031212 | MAP4                 |
| 3                                       | 47850690                                            | 48089272        | - 14943     |                      |
| protein_coding                          | microtubule associated protein 4 [Source:HGNC       |                 |             |                      |
| Symbol;Acc:HGNC:6862]                   | -                                                   | 6681 9143       | 9305 7569   | 6566                 |
| 7273                                    | 24.45109922                                         | 26.9764552      | 28.84569697 |                      |
| 24.49074099                             | 19.14792332                                         | 22.72070626     |             |                      |
| ENSG00000236863                         | 10.41265508                                         | 10.19646255     | 8.800185745 | 0                    |
| 0                                       | 1.962431039                                         | 9.803101125     | 0.65414368  |                      |
| 3.91623764                              | 0.032650813                                         | 1               | RPL23AP23 1 |                      |
| 235295865                               | 235296335                                           | +               | 471         | processed_pseudogene |
|                                         | ribosomal protein L23a pseudogene 23 [Source:HGNC   |                 |             |                      |
| Symbol;Acc:HGNC:36272]                  | -                                                   | 9 11            | 9 0         | 0                    |
| 2                                       | 1.045000059                                         | 1.0296882       | 0.885164643 | 0                    |
| 0                                       | 0.198223493                                         |                 |             |                      |
| ENSG00000169976                         | 1296.954038                                         | 1749.156803     | 1674.968687 |                      |
| 2039.293791                             | 1784.768341                                         | 2172.41116      | 1573.693176 |                      |
| 1998.82443                              | -0.344295736                                        | 0.032666913     | 0.142111297 | SF3B5                |
| 6                                       | 144094881                                           | 144095573       | - 693       |                      |
| protein_coding                          | splicing factor 3b subunit 5 [Source:HGNC           |                 |             |                      |
| Symbol;Acc:HGNC:21083]                  | -                                                   | 1121 1887       | 1713 2030   | 1953                 |
| 2214                                    | 88.46410554                                         | 120.0528912     | 114.5055624 |                      |
| 141.6328583                             | 122.808268                                          | 149.1387222     |             |                      |
| ENSG00000103313                         | 18.51138681                                         | 3.707804563     | 0 0 0       |                      |
| 0                                       | 7.406397125                                         | 0               | 5.376402033 | 0.032685239          |
| 1                                       | MEFV 16                                             | 3242028 3256627 | -           | 4819                 |
| protein_coding                          | "MEFV, pyrin innate immunity regulator [Source:HGNC |                 |             |                      |
| Symbol;Acc:HGNC:6998]"                  | -                                                   | 16 4            | 0 0 0       |                      |
| 0                                       | 0.181575718                                         | 0.036596287     | 0 0 0       |                      |
| 0                                       |                                                     |                 |             |                      |
| ENSG00000115738                         | 79.83035562                                         | 112.161088      | 106.5800274 |                      |
| 169.7737195                             | 162.6670582                                         | 151.10719       | 99.52382368 |                      |
| 161.1826559                             | -0.692987796                                        | 0.032689093     | 0.14213972  | ID2                  |
| 2                                       | 8678845 8684453                                     | +               | 2205        | protein_coding       |
| inhibitor of DNA binding 2 [Source:HGNC |                                                     |                 |             | bHLH                 |
| Symbol;Acc:HGNC:5361]                   |                                                     |                 |             |                      |
| 69                                      | 121 109                                             | 169 178         | 154         | 1.711335698          |
| 2.419417037                             | 2.289920262                                         | 3.705777391     | 3.51779078  |                      |
| 3.260304496                             |                                                     |                 |             |                      |
| ENSG00000164967                         | 170.0733663                                         | 237.2994921     | 205.3376674 |                      |
| 253.1537119                             | 373.7686899                                         | 284.5525006     | 204.2368419 |                      |
| 303.8249675                             | -0.571902189                                        | 0.032701115     | 0.14213972  | RPP25L               |
| 9                                       | 34610486                                            | 34612104        | - 1092      |                      |
| protein_coding                          | ribonuclease P/MRP subunit p25 like [Source:HGNC    |                 |             |                      |
| Symbol;Acc:HGNC:19909]                  | -                                                   | 147 256         | 210 252     | 409                  |
| 290                                     | 7.361891443                                         | 10.33597107     | 8.908387752 |                      |
| 11.15781404                             | 16.32146986                                         | 12.39713685     |             |                      |
| ENSG00000175183                         | 255.6885303                                         | 298.4782674     | 276.7169518 |                      |
| 153.700468                              | 208.3600521                                         | 204.092828      | 276.9612498 |                      |
| 188.7177827                             | 0.553507485                                         | 0.032708366     | 0.14213972  | CSRP2                |
| 12                                      | 76858715                                            | 76879060        | - 5873      |                      |
| protein_coding                          | cysteine and glycine rich protein 2 [Source:HGNC    |                 |             |                      |

|                        |                                          |              |             |             |      |             |
|------------------------|------------------------------------------|--------------|-------------|-------------|------|-------------|
| Symbol;Acc:HGNC:2470]  | -                                        | 221          | 322         | 283         | 153  | 228         |
| 208                    | 2.057912881                              | 2.417295975  | 2.232178344 |             |      |             |
| 1.259599984            | 1.691739322                              | 1.65329126   |             |             |      |             |
| ENSG00000140455        | 1296.954038                              | 983.4951604  | 1188.025076 |             |      |             |
| 964.3950931            | 904.7212786                              | 835.0144071  | 1156.158092 |             |      |             |
| 901.3769263            | 0.358567658                              | 0.032710639  | 0.14213972  |             |      | USP3        |
| 15                     | 63504511                                 | 63594640     | +           | 7764        |      |             |
| protein_coding         | ubiquitin specific peptidase 3           | [Source:HGNC |             |             |      |             |
| Symbol;Acc:HGNC:12626] | -                                        | 1121         | 1061        | 1215        | 960  | 990         |
| 851                    | 7.89613925                               | 6.025093837  | 7.249252166 |             |      |             |
| 5.978426892            | 5.556588882                              | 5.116701353  |             |             |      |             |
| ENSG00000076928        | 4130.353182                              | 5710.945979  | 4827.390781 |             |      |             |
| 6329.847377            | 5510.575061                              | 6363.182644  | 4889.563314 |             |      |             |
| 6067.868361            | -0.31121392                              | 0.032732452  | 0.142178123 |             |      |             |
| ARHGEF1                | 19                                       | 41883161     | 41930150    | +           | 8636 |             |
| protein_coding         | Rho guanine nucleotide exchange factor 1 | [Source:HGNC |             |             |      |             |
| Symbol;Acc:HGNC:681]   | -                                        | 3570         | 6161        | 4937        | 6301 | 6030        |
| 6485                   | 22.60738317                              | 31.45375742  | 26.48213221 |             |      |             |
| 35.27752127            | 30.42729017                              | 35.05446817  |             |             |      |             |
| ENSG00000131711        | 3998.459551                              | 2886.525853  | 3514.207508 |             |      |             |
| 3133.279474            | 2320.290229                              | 2724.835498  | 3466.397637 |             |      |             |
| 2726.135067            | 0.34644186                               | 0.032738078  | 0.142178123 |             |      | MAP1B       |
| 5                      | 72107234                                 | 72209570     | +           | 12630       |      |             |
| protein_coding         | microtubule associated protein 1B        | [Source:HGNC |             |             |      |             |
| Symbol;Acc:HGNC:6836]  | -                                        | 3456         | 3114        | 3594        | 3119 | 2539        |
| 2777                   | 14.96459942                              | 10.87049237  | 13.18187467 |             |      |             |
| 11.94024507            | 8.760279204                              | 10.26404542  |             |             |      |             |
| ENSG00000232814        | 0                                        | 19.46597396  | 7.822387329 | 0           |      |             |
| 0.913859877            | 0                                        | 9.096120429  | 0.304619959 | 4.721184348 |      |             |
| 0.032822147            | 1                                        | COL4A2-AS1   | 13          | 110502575   |      |             |
| 110508179              | -                                        | 540          | antisense   | COL4A2      |      |             |
| antisense RNA 1        | [Source:HGNC Symbol;Acc:HGNC:40156]      |              |             |             | -    | 0           |
| 21                     | 8                                        | 0            | 1           | 0           | 0    | 1.714586867 |
| 0.686275797            | 0                                        | 0.080698384  | 0           |             |      |             |
| ENSG00000197951        | 208.2531016                              | 408.7854531  | 321.6956789 |             |      |             |
| 468.1334515            | 529.124869                               | 390.5237767  | 312.9114112 |             |      |             |
| 462.5940324            | -0.561907232                             | 0.032826123  | 0.142497871 |             |      | ZNF71       |
| 19                     | 56595264                                 | 56626481     | +           | 6170        |      |             |
| protein_coding         | zinc finger protein 71                   | [Source:HGNC |             |             |      |             |
| Symbol;Acc:HGNC:13141] | zf-C2H2                                  | 180          | 441         | 329         | 466  | 579         |
| 398                    | 1.595445795                              | 3.151282832  | 2.470092345 |             |      |             |
| 3.65175783             | 4.089328483                              | 3.011230106  |             |             |      |             |
| ENSG00000255717        | 1389.510973                              | 1593.429011  | 1476.475608 |             |      |             |
| 1136.177969            | 1146.894146                              | 1299.129348  | 1486.471864 |             |      |             |
| 1194.067154            | 0.316361072                              | 0.032830346  | 0.142497871 |             |      | SNHG1       |
| 11                     | 62851988                                 | 62855914     | -           | 3756        |      |             |
| processed_transcript   | small nucleolar RNA host gene 1          | [Source:HGNC |             |             |      |             |
| Symbol;Acc:HGNC:32688] | -                                        | 1201         | 1719        | 1510        | 1131 | 1255        |
| 1324                   | 17.48687222                              | 20.17828497  | 18.62317908 |             |      |             |
| 14.55922433            | 14.56051513                              | 16.45539976  |             |             |      |             |



|                            |                                                     |               |                     |        |
|----------------------------|-----------------------------------------------------|---------------|---------------------|--------|
| ENSG00000264364            | 2082.531016                                         | 2290.496269   | 2231.335986         |        |
| 2791.722879                | 2450.058331                                         | 2798.426662   | 2201.454424         |        |
| 2680.069291                | -0.2835174                                          | 0.032843707   | 0.1425154           | DYNLL2 |
| 17                         | 58083415                                            | 58095536      | + 6805              |        |
| protein_coding             | dynein light chain LC8-type 2 [Source:HGNC          |               |                     |        |
| Symbol;Acc:HGNC:24596]     | -                                                   | 1800 2471     | 2282 2779           | 2681   |
| 2852                       | 14.46568781                                         | 16.00952969   | 15.53423842         |        |
| 19.74520439                | 17.16829955                                         | 19.56444027   |                     |        |
| ENSG00000186834            | 1187.042679                                         | 1217.086848   | 1601.633806         |        |
| 1791.16297                 | 1484.108441                                         | 1877.065289   | 1335.254444         |        |
| 1717.445567                | -0.362749792                                        | 0.03295692    | 0.142966069         | HEXIM1 |
| 17                         | 45148502                                            | 45152101      | + 3600              |        |
| protein_coding             | hexamethylene bisacetamide inducible 1 [Source:HGNC |               |                     |        |
| Symbol;Acc:HGNC:24953]     | -                                                   | 1026 1313     | 1638 1783           | 1624   |
| 1913                       | 15.58617588                                         | 16.0803754    | 21.07724542         |        |
| 23.94694181                | 19.65812634                                         | 24.80610086   |                     |        |
| ENSG00000236562            | 1.156961676                                         | 0 1.955596832 | 10.04578222         |        |
| 17.36333767                | 5.887293117                                         | 1.037519503   | 11.09880434         |        |
| -3.435317128               | 0.032971633                                         | 1             | AC116049.1          | 4      |
| 66094142                   | 66094526                                            | + 385         |                     |        |
| processed_pseudogene       | interferon induced transmembrane protein 3          |               |                     |        |
| (1-8U) (IFITM3) pseudogene | -                                                   | 1             | 0 2                 | 10     |
| 19                         | 6 0.142047627                                       | 0             | 0.240642163         |        |
| 1.255857857                | 2.150559532                                         | 0.727505962   |                     |        |
| ENSG00000178381            | 598.1491863                                         | 489.4302024   | 365.6966076         |        |
| 829.7816114                | 651.5820926                                         | 558.3116306   | 484.4253321         |        |
| 679.8917782                | -0.489951234                                        | 0.033005191   | 0.143112168         |        |
| ZFAND2A 7                  | 1152071 1160759                                     | - 2281        | protein_coding zinc |        |
| finger AN1-type            | containing 2A [Source:HGNC                          |               |                     |        |
| -                          | 517 528                                             | 374 826       | 713 569             |        |
| 12.39538358                | 10.20569524                                         | 7.595367164   | 17.50878374         |        |
| 13.62143437                | 11.64482636                                         |               |                     |        |
| ENSG00000015676            | 2739.685248                                         | 3332.389351   | 3706.833796         |        |
| 4125.802758                | 3846.436224                                         | 4105.405733   | 3259.636132         |        |
| 4025.881572                | -0.304267432                                        | 0.033014799   | 0.143112168         | NUDCD3 |
| 7                          | 44379121                                            | 44490880      | - 10113             |        |
| protein_coding             | NudC domain containing 3 [Source:HGNC               |               |                     |        |
| Symbol;Acc:HGNC:22208]     | -                                                   | 2368 3595     | 3791 4107           | 4209   |
| 4184                       | 12.80549596                                         | 15.67302569   | 17.36505779         |        |
| 19.63567847                | 18.13666855                                         | 19.31335416   |                     |        |
| ENSG00000176402            | 15.04050178                                         | 4.634755704   | 5.866790497         |        |
| 24.10987733                | 46.60685375                                         | 19.62431039   | 8.514015995         |        |
| 30.11368049                | -1.839515269                                        | 0.033022646   | 0.143112168         | GJC3   |
| 7                          | 99923269                                            | 99929620      | - 1116              |        |
| protein_coding             | gap junction protein gamma 3 [Source:HGNC           |               |                     |        |
| Symbol;Acc:HGNC:17495]     | -                                                   | 13 5          | 6 24                | 51     |
| 20                         | 0.637050514                                         | 0.197533049   | 0.249051701         |        |
| 1.03979629                 | 1.991427863                                         | 0.836588397   |                     |        |
| ENSG00000103642            | 1091.01486                                          | 1326.467083   | 1190.958471         |        |
| 806.6763123                | 1095.717993                                         | 890.9436917   | 1202.813471         |        |

|                                                            |                                                              |             |                      |                |
|------------------------------------------------------------|--------------------------------------------------------------|-------------|----------------------|----------------|
| 931.1126657                                                | 0.369433015                                                  | 0.033028045 | 0.143112168          | LACTB          |
| 15                                                         | 63121800                                                     | 63142061    | + 3972               |                |
| protein_coding                                             | lactamase beta [Source:HGNC Symbol;Acc:HGNC:16468]           |             |                      |                |
| -                                                          | 943                                                          | 1431        | 1218 803             | 1199 908       |
| 12.98366094                                                | 15.88416362                                                  | 14.204976   | 9.774791938          |                |
| 13.15432419                                                | 10.6714306                                                   |             |                      |                |
| ENSG00000189366                                            | 0                                                            | 12.05036483 | 7.822387329          | 15.06867333    |
|                                                            | 48.4345735                                                   | 26.49281903 | 6.62425072           | 29.99868862    |
|                                                            | -2.160880617                                                 | 0.033061763 | 0.143166576          | ALG1L 3        |
|                                                            | 125929275                                                    | 125937039   | - 843                | protein_coding |
|                                                            | "ALG1, chitobiosyldiphosphodolichol beta-mannosyltransferase |             |                      |                |
| like [Source:HGNC Symbol;Acc:HGNC:33721]"                  | -                                                            | 0           | 13                   |                |
| 8                                                          | 15                                                           | 53          | 27 0                 | 0.679907349    |
| 0.439607272                                                | 0.860329671                                                  | 2.739724496 | 1.495141256          |                |
| ENSG00000244486                                            | 698.8048521                                                  | 1167.958437 | 2174.623678          |                |
| 535.4401923                                                | 498.0536332                                                  | 828.1458984 | 1347.128989          |                |
| 620.5465747                                                | 1.118457336                                                  | 0.033065863 | 0.143166576          | SCARF2         |
| 22                                                         | 20424815                                                     | 20437826    | - 3341               |                |
| protein_coding                                             | scavenger receptor class F member 2 [Source:HGNC             |             |                      |                |
| Symbol;Acc:HGNC:19869]                                     | -                                                            | 604         | 1260                 | 2224 533 545   |
|                                                            | 844                                                          | 9.886786951 | 16.627541            | 30.83619356    |
| 7.713508277                                                | 7.108510748                                                  | 11.79266623 |                      |                |
| ENSG00000181191                                            | 634.0149983                                                  | 758.2460332 | 675.6587056          |                |
| 786.5847478                                                | 985.1409479                                                  | 905.6619245 | 689.306579           |                |
| 892.4625401                                                | -0.372277499                                                 | 0.033068698 | 0.143166576          | PJA1           |
| X                                                          | 69160851                                                     | 69165793    | - 3117               |                |
| protein_coding                                             | praja ring finger ubiquitin ligase 1 [Source:HGNC            |             |                      |                |
| Symbol;Acc:HGNC:16648]                                     | -                                                            | 548         | 818                  | 691 783 1078   |
|                                                            | 923                                                          | 9.614760463 | 11.57045558          | 10.26936762    |
| 12.14580142                                                | 15.07094748                                                  | 13.82327457 |                      |                |
| ENSG00000227666                                            | 0                                                            | 0           | 0.977798416          | 30.13734666 0  |
|                                                            | 0.981215519                                                  | 0.325932805 | 10.37285406          | -4.830881976   |
|                                                            | 0.033094628                                                  | 1           | CYCSP24 9            | 94038030       |
| 94038345                                                   | +                                                            | 316         | processed_pseudogene | "cytochrome c, |
| somatic pseudogene 24 [Source:HGNC Symbol;Acc:HGNC:24398]" | -                                                            |             |                      |                |
|                                                            | 0                                                            | 0           | 1 0                  | 0              |
|                                                            | 0.146593723                                                  | 4.590239952 | 0                    | 0.147726685    |
| ENSG00000166454                                            | 2021.212047                                                  | 1913.227155 | 1913.5515            |                |
| 2443.134236                                                | 2671.212422                                                  | 2099.801212 | 1949.330234          |                |
| 2404.715956                                                | -0.30311265                                                  | 0.033135071 | 0.143413316          | ATMIN          |
| 16                                                         | 81035847                                                     | 81047358    | + 6262               |                |
| protein_coding                                             | ATM interactor [Source:HGNC Symbol;Acc:HGNC:29034]           |             |                      |                |
| -                                                          | 1747                                                         | 2064        | 1957 2432            | 2923 2140      |
| 15.25718999                                                | 14.53217395                                                  | 14.47705479 | 18.7781033           |                |
| 20.34109602                                                | 15.95316092                                                  |             |                      |                |
| ENSG00000110987                                            | 401.4657015                                                  | 411.5663065 | 412.6309316          |                |
| 474.1609208                                                | 614.1138376                                                  | 550.4619064 | 408.5543132          |                |
| 546.2455549                                                | -0.419243675                                                 | 0.033244327 | 0.143812718          | BCL7A          |
| 12                                                         | 122019422                                                    | 122062044   | + 6565               |                |
| protein_coding                                             | BCL tumor suppressor 7A [Source:HGNC                         |             |                      |                |

|                                      |                                                  |             |             |             |             |               |
|--------------------------------------|--------------------------------------------------|-------------|-------------|-------------|-------------|---------------|
| Symbol;Acc:HGNC:1004]                | -                                                | 347         | 444         | 422         | 472         | 672           |
| 561                                  | 2.890609709                                      | 2.981825316 | 2.977694758 |             |             |               |
| 3.476229852                          | 4.460598565                                      | 3.989093049 |             |             |             |               |
| ENSG00000184489                      | 30.08100357                                      | 27.80853423 | 58.66790497 |             |             |               |
| 103.4715569                          | 63.97019142                                      | 77.51602604 | 38.85248092 |             |             |               |
| 81.65259144                          | -1.06913958                                      | 0.033246166 | 0.143812718 |             |             | PTP4A3        |
| 8                                    | 141391993                                        | 141432454   | +           | 2877        |             |               |
| protein_coding                       | "protein tyrosine phosphatase type IVA, member 3 |             |             |             |             |               |
| [Source:HGNC Symbol;Acc:HGNC:9636]"  | -                                                | 26          | 30          | 60          |             |               |
| 103                                  | 70                                               | 79          | 0.49422897  | 0.459743239 |             |               |
| 0.966081675                          | 1.731006024                                      | 1.060270739 | 1.281838364 |             |             |               |
| ENSG00000171574                      | 374.8555829                                      | 471.8181307 | 486.9436112 |             |             |               |
| 736.3558367                          | 491.656614                                       | 608.3536221 | 444.5391083 |             |             |               |
| 612.1220243                          | -0.460098014                                     | 0.033294787 | 0.143962579 |             |             | ZNF584        |
| 19                                   | 58401504                                         | 58418327    | +           | 3696        |             |               |
| protein_coding                       | zinc finger protein 584 [Source:HGNC             |             |             |             |             |               |
| Symbol;Acc:HGNC:27318]               | zf-C2H2                                          | 324         | 509         | 498         | 733         | 538           |
| 620                                  | 4.794107414                                      | 6.071832435 | 6.241656094 |             |             |               |
| 9.588998012                          | 6.343207391                                      | 7.83079334  |             |             |             |               |
| ENSG00000162885                      | 340.1467327                                      | 388.392528  | 420.4533189 |             |             |               |
| 225.0255217                          | 329.9034157                                      | 251.191173  | 382.9975265 |             |             |               |
| 268.7067035                          | 0.511117245                                      | 0.033299645 | 0.143962579 |             |             |               |
| B3GALNT2                             | 1                                                | 235449923   | 235504481   | -           |             | 5702          |
| protein_coding                       | "beta-1,3-N-acetylgalactosaminyltransferase 2    |             |             |             |             |               |
| [Source:HGNC Symbol;Acc:HGNC:28596]" | -                                                | 294         | 419         | 430         |             |               |
| 224                                  | 361                                              | 256         | 2.819777431 | 3.239819149 |             |               |
| 3.493362858                          | 1.89942444                                       | 2.758916691 | 2.095843201 |             |             |               |
| ENSG00000163694                      | 83.30124065                                      | 62.10572644 | 128.0915925 |             |             |               |
| 51.23348932                          | 36.5543951                                       | 50.04199149 | 91.16618654 |             |             |               |
| 45.94329197                          | 0.989684031                                      | 0.033310998 | 0.143970942 |             |             | RBM47         |
| 4                                    | 40423267                                         | 40630875    | -           | 8544        |             |               |
| protein_coding                       | RNA binding motif protein 47 [Source:HGNC        |             |             |             |             |               |
| Symbol;Acc:HGNC:30358]               | -                                                | 72          | 67          | 131         | 51          | 40            |
| 51                                   | 0.460856768                                      | 0.345738323 | 0.710252076 |             |             |               |
| 0.288609188                          | 0.204012769                                      | 0.278647385 |             |             |             |               |
| ENSG00000255142                      | 2.313923351                                      | 6.488657986 | 3.911193665 |             |             |               |
| 20.09156444                          | 12.79403828                                      | 26.49281903 | 4.237925001 |             |             |               |
| 19.79280725                          | -2.208905505                                     | 0.033324273 | 0.143987609 |             |             |               |
| AP006621.2                           | 11                                               | 781645      | 782105      | +           | 284         | lincRNA novel |
| transcript                           | -                                                | 2           | 7           | 4           | 20          | 14            |
|                                      | 0.38512913                                       | 1.086709986 | 0.6524453   |             | 3.404966725 |               |
|                                      | 2.14816825                                       | 4.438042532 |             |             |             |               |
| ENSG00000178814                      | 98.34174244                                      | 252.1307103 | 162.3145371 |             |             |               |
| 292.3322626                          | 264.1055046                                      | 275.721561  | 170.9289966 |             |             |               |
| 277.3864427                          | -0.694809012                                     | 0.033344935 | 0.144036174 |             |             | OPLAH         |
| 8                                    | 144051266                                        | 144063965   | -           | 4452        |             |               |
| protein_coding                       | "5-oxoprolinase, ATP-hydrolysing [Source:HGNC    |             |             |             |             |               |
| Symbol;Acc:HGNC:8149]"               | -                                                | 85          | 272         | 166         | 291         | 289           |
| 281                                  | 1.044139397                                      | 2.693690573 | 1.727250743 |             |             |               |
| 3.160378145                          | 2.828793757                                      | 2.946437275 |             |             |             |               |

|                        |                                                       |             |                        |                |                |
|------------------------|-------------------------------------------------------|-------------|------------------------|----------------|----------------|
| ENSG00000096654        | 317.0074991                                           | 243.78815   | 298.2285169            |                |                |
| 188.8607057            | 187.3412749                                           | 215.8674143 | 286.3413887            |                |                |
| 197.356465             | 0.536064681                                           | 0.033357787 | 0.144050985            | ZNF184         |                |
| 6                      | 27450743                                              | 27473118    | -                      | 3122           |                |
| protein_coding         | zinc finger protein 184 [Source:HGNC                  |             |                        |                |                |
| Symbol;Acc:HGNC:12975] | zf-C2H2                                               | 274         | 263                    | 305            | 188            |
| 220                    | 4.799681032                                           | 3.714127495 | 4.52552946             |                | 205            |
| 2.911562834            | 2.861406505                                           | 3.289544895 |                        |                |                |
| ENSG00000142408        | 65.94681552                                           | 75.08304241 | 86.04626062            |                |                |
| 161.7370937            | 102.3523063                                           | 128.5392331 | 75.69203952            |                |                |
| 130.876211             | -0.787821075                                          | 0.03339363  | 0.144165046            | CACNG8         |                |
| 19                     | 53963040                                              | 53990215    | +                      | 8747           |                |
| protein_coding         | calcium voltage-gated channel auxiliary subunit gamma |             |                        |                |                |
| 8 [Source:HGNC         | Symbol;Acc:HGNC:13628]                                | -           | 57                     | 81             | 88             |
| 161                    | 112                                                   | 131         | 0.356377635            | 0.40828164     |                |
| 0.466043013            | 0.889954833                                           | 0.557978537 | 0.699130429            |                |                |
| ENSG00000249700        | 28.92404189                                           | 27.80853423 | 3.911193665            |                |                |
| 125.5722778            | 59.40089203                                           | 12.75580175 | 20.21458993            |                |                |
| 65.90965718            | -1.707462586                                          | 0.033420243 | 0.144239203            |                |                |
| SRD5A3-AS1             | 4                                                     | 55363971    | 55395847               | -              | 5148           |
| processed_transcript   | SRD5A3 antisense RNA 1 [Source:HGNC                   |             |                        |                |                |
| Symbol;Acc:HGNC:44138] | -                                                     | 25          | 30                     | 4              | 125            |
| 13                     | 0.265580499                                           | 0.256931099 | 0.035993486            |                | 65             |
| 1.17401242             | 0.550216254                                           | 0.11788291  |                        |                |                |
| ENSG00000185267        | 9.255693406                                           | 20.3929251  | 13.68917783            |                |                |
| 38.17397244            | 23.76035681                                           | 62.79779325 | 14.44593211            |                |                |
| 41.57737417            | -1.517050321                                          | 0.033468396 | 0.144406257            | CDNF           |                |
| 10                     | 14819250                                              | 14838575    | -                      | 1733           |                |
| protein_coding         | cerebral dopamine neurotrophic factor [Source:HGNC    |             |                        |                |                |
| Symbol;Acc:HGNC:24913] | -                                                     | 8           | 22                     | 14             | 38             |
| 64                     | 0.252456256                                           | 0.559703569 | 0.374224252            |                | 26             |
| 1.060196217            | 0.653782638                                           | 1.723961041 |                        |                |                |
| ENSG00000181856        | 2.313923351                                           | 4.634755704 | 0.977798416            |                |                |
| 15.06867333            | 19.19105743                                           | 12.75580175 | 2.642159157            |                |                |
| 15.67184417            | -2.559733015                                          | 0.033503203 | 1                      | SLC2A4         | 17             |
| 7281667                | 7288257                                               | +           | 4046                   | protein_coding | solute carrier |
| family 2 member        | 4 [Source:HGNC Symbol;Acc:HGNC:11009]                 |             |                        |                |                |
| 5                      | 1                                                     | 15          | 21                     | 13             | 0.027033285    |
| 0.054485142            | 0.011449238                                           | 0.179253068 | 0.226178862            |                |                |
| 0.149990416            |                                                       |             |                        |                |                |
| ENSG00000248916        | 0                                                     | 0.926951141 | 0                      | 25.11445555    | 0              |
| 3.924862078            | 0.308983714                                           | 9.679772543 | -4.731016163           |                |                |
| 0.033506211            | 1                                                     | NUP210P3    | 3                      | 129323046      |                |
| 129325426              | -                                                     | 388         | unprocessed_pseudogene |                |                |
| nucleoporin 210        | pseudogene 3 [Source:HGNC Symbol;Acc:HGNC:42712]      |             |                        |                |                |
| -                      | 0                                                     | 1           | 0                      | 25             | 0              |
| 0.113632414            | 0                                                     | 3.115369039 | 0                      | 0.481253944    |                |
| ENSG00000280890        | 11.56961676                                           | 2.780853423 | 3.911193665            | 0              |                |
| 0                      | 0                                                     | 6.087221281 | 0                      | 5.094046066    |                |
| 0.033545596            | 1                                                     | ELDR        | 7                      | 55235965       | 55255635       |

|                                                 |                                                         |                                             |             |                            |             |      |
|-------------------------------------------------|---------------------------------------------------------|---------------------------------------------|-------------|----------------------------|-------------|------|
| -                                               | 2941                                                    | lincRNA EGFR long non-coding downstream RNA | -           | 10                         | 3           | 4    |
| [Source:HGNC Symbol;Acc:HGNC:49511]             |                                                         |                                             |             |                            |             |      |
| 0                                               | 0                                                       | 0                                           | 0.185951501 | 0.044973863                |             |      |
| 0.063003898                                     | 0                                                       | 0                                           | 0           |                            |             |      |
| ENSG00000251870                                 | 8.09873173                                              | 0.926951141                                 | 9.777984162 | 0                          |             |      |
| 0                                               | 0                                                       | 6.267889011                                 | 0           | 5.138645252                |             |      |
| 0.033549191                                     | 1                                                       | RNU2-69P                                    | 18          | 58926197                   |             |      |
| 58926296                                        | -                                                       | 100                                         | snRNA       | "RNA, U2 small nuclear 69, |             |      |
| pseudogene [Source:HGNC Symbol;Acc:HGNC:48562]" | -                                                       |                                             |             | 7                          | 1           |      |
| 10                                              | 0                                                       | 0                                           | 0           | 3.82818355                 | 0.440893766 |      |
| 4.632361631                                     | 0                                                       | 0                                           | 0           |                            |             |      |
| ENSG00000184831                                 | 214.03791                                               | 306.8208276                                 | 300.1841138 |                            |             |      |
| 205.9385355                                     | 164.4947779                                             | 182.5060866                                 | 273.6809505 |                            |             |      |
| 184.3131334                                     | 0.572360566                                             | 0.033566582                                 | 0.144778934 |                            | AP00        |      |
| X                                               | 23833353                                                | 23907934                                    | -           | 2353                       |             |      |
| protein_coding                                  | apolipoprotein 0                                        | [Source:HGNC Symbol;Acc:HGNC:28727]         |             |                            |             |      |
| -                                               | 185                                                     | 331                                         | 307         | 205                        | 180         | 186  |
| 4.299762958                                     | 6.202117997                                             | 6.04392274                                  | 4.212434397 |                            |             |      |
| 3.333566903                                     | 3.690090801                                             |                                             |             |                            |             |      |
| ENSG00000163638                                 | 34.70885027                                             | 66.74048214                                 | 65.51249388 |                            |             |      |
| 86.39372709                                     | 100.5245865                                             | 130.5016641                                 | 55.6539421  |                            |             |      |
| 105.8066592                                     | -0.922190829                                            | 0.033573711                                 | 0.144778934 |                            |             |      |
| ADAMTS9                                         | 3                                                       | 64515654                                    | 64688000    | -                          | 10680       |      |
| protein_coding                                  | ADAM metalloproteinase with thrombospondin type 1 motif | 9 [Source:HGNC Symbol;Acc:HGNC:13202]       | -           | 30                         | 72          | 67   |
| 86                                              | 110                                                     | 133                                         | 0.153618923 | 0.297231752                |             |      |
| 0.290606956                                     | 0.389339454                                             | 0.448828091                                 | 0.581334937 |                            |             |      |
| ENSG00000102931                                 | 32.39492692                                             | 112.161088                                  | 108.5356242 |                            |             |      |
| 205.9385355                                     | 103.2661661                                             | 186.4309487                                 | 84.36387972 |                            |             |      |
| 165.2118835                                     | -0.964263054                                            | 0.033598759                                 | 0.144846089 |                            | ARL2BP      |      |
| 16                                              | 57245098                                                | 57253635                                    | +           | 2155                       |             |      |
| protein_coding                                  | ADP ribosylation factor like GTPase 2 binding protein   | [Source:HGNC Symbol;Acc:HGNC:17146]         | -           | 28                         | 121         | 111  |
| 205                                             | 113                                                     | 190                                         | 0.710567712 | 2.475552003                |             |      |
| 2.386042418                                     | 4.599470133                                             | 2.285018743                                 | 4.115781989 |                            |             |      |
| ENSG00000113161                                 | 1639.414694                                             | 1440.482073                                 | 1980.041793 |                            |             |      |
| 1496.821551                                     | 1270.26523                                              | 1179.421054                                 | 1686.646187 |                            |             |      |
| 1315.502612                                     | 0.358607231                                             | 0.033609872                                 | 0.144853149 |                            | HMGR        |      |
| 5                                               | 75336329                                                | 75362104                                    | +           | 6215                       |             |      |
| protein_coding                                  | 3-hydroxy-3-methylglutaryl-CoA reductase                | [Source:HGNC Symbol;Acc:HGNC:5006]          | -           | 1417                       | 1554        | 2025 |
| 1202                                            | 12.46876472                                             | 11.02411765                                 | 15.09337458 |                            |             |      |
| 11.59167916                                     | 9.74613146                                              | 9.028370448                                 |             |                            |             |      |
| ENSG00000101162                                 | 3.470885027                                             | 16.68512054                                 | 26.40055724 |                            |             |      |
| 59.2701151                                      | 39.29597473                                             | 40.2298363                                  | 15.51885427 |                            |             |      |
| 46.26530871                                     | -1.564980453                                            | 0.033624289                                 | 0.144874437 |                            | TUBB1       |      |
| 20                                              | 59019254                                                | 59026654                                    | +           | 3496                       |             |      |
| protein_coding                                  | tubulin beta 1 class VI                                 | [Source:HGNC Symbol;Acc:HGNC:16257]         | -           | 3                          | 18          | 27   |
| 41                                              | 0.04692935                                              | 0.227004799                                 | 0.357762483 |                            | 59          | 43   |

|                                                        |                                                      |                |                  |       |  |  |
|--------------------------------------------------------|------------------------------------------------------|----------------|------------------|-------|--|--|
| 0.815984303                                            | 0.535988695                                          | 0.547467659    |                  |       |  |  |
| ENSG00000159363                                        | 1725.029858                                          | 1609.187181    | 2101.288796      |       |  |  |
| 1603.306842                                            | 1269.35137                                           | 1410.006701    | 1811.835278      |       |  |  |
| 1427.554971                                            | 0.34412923                                           | 0.033642205    | 0.144910787      |       |  |  |
| ATP13A2 1                                              | 16985958                                             | 17011928       | -                | 5253  |  |  |
| protein_coding                                         | ATPase cation transporting 13A2                      | [Source:HGNC   |                  |       |  |  |
| Symbol;Acc:HGNC:30213]                                 | -                                                    | 1491 1736      | 2149 1596        | 1389  |  |  |
| 1437                                                   | 15.52261748                                          | 14.57056115    | 18.95097115      |       |  |  |
| 14.69016598                                            | 11.52267845                                          | 12.77013249    |                  |       |  |  |
| ENSG00000186222                                        | 433.8606284                                          | 543.1933685    | 455.6540619      |       |  |  |
| 766.4931834                                            | 667.1177105                                          | 517.1005788    | 477.569353       |       |  |  |
| 650.2371576                                            | -0.444462585                                         | 0.03374095     | 0.145295185      |       |  |  |
| BLOC1S4 4                                              | 6716055 6717671 +                                    | 1617           | protein_coding   |       |  |  |
| biogenesis of lysosomal organelles complex 1 subunit 4 | [Source:HGNC                                         |                |                  |       |  |  |
| Symbol;Acc:HGNC:24206]                                 | -                                                    | 375 586        | 466 763          | 730   |  |  |
| 527                                                    | 12.68282385                                          | 15.97796826    | 13.34991045      |       |  |  |
| 22.81475107                                            | 19.67303832                                          | 15.21411277    |                  |       |  |  |
| ENSG00000273456                                        | 11.56961676                                          | 12.97731597    | 9.777984162      |       |  |  |
| 51.23348932                                            | 21.93263706                                          | 30.4176811     | 11.44163896      |       |  |  |
| 34.52793583                                            | -1.59164757                                          | 0.033763076    | 0.145332306      |       |  |  |
| AC064836.3                                             | 2 202374932                                          | 202375604      | -                | 673   |  |  |
| lincRNA                                                | novel transcript                                     | -              | 10 14            | 10    |  |  |
| 51                                                     | 24 31                                                | 0.812605296    | 0.917163852      |       |  |  |
| 0.68831525                                             | 3.664007284                                          | 1.554013457    | 2.150268364      |       |  |  |
| ENSG00000037757                                        | 549.556796                                           | 647.9388475    | 544.6337178      |       |  |  |
| 884.0288354                                            | 760.331418                                           | 656.4331825    | 580.7097871      |       |  |  |
| 766.9311453                                            | -0.400683188                                         | 0.033768585    | 0.145332306      | MRI1  |  |  |
| 19                                                     | 13764532                                             | 13774282       | + 3456           |       |  |  |
| protein_coding                                         | methylthioribose-1-phosphate isomerase 1             | [Source:HGNC   |                  |       |  |  |
| Symbol;Acc:HGNC:28469]                                 | -                                                    | 475 699        | 557 880          | 832   |  |  |
| 669                                                    | 7.516481425                                          | 8.917382589    | 7.46593006       |       |  |  |
| 12.31147691                                            | 10.49078992                                          | 9.036461857    |                  |       |  |  |
| ENSG00000270165                                        | 11.56961676                                          | 3.707804563    | 2.933395248      | 0     |  |  |
| 0                                                      | 0 6.07027219                                         | 0              | 5.090191421      |       |  |  |
| 0.033812527                                            | 1 AC010530.1                                         | 16             | 67738588         |       |  |  |
| 67739922                                               | - 569                                                | sense_intronic | novel transcript |       |  |  |
| -                                                      | 10 4                                                 | 3 0            | 0 0              |       |  |  |
| 0.961130693                                            | 0.309942893                                          | 0.244236993    | 0 0              | 0     |  |  |
| ENSG00000115363                                        | 804.0883646                                          | 916.7546783    | 815.4838791      |       |  |  |
| 458.0876692                                            | 822.4738897                                          | 557.3304151    | 845.4423073      |       |  |  |
| 612.630658                                             | 0.464248901                                          | 0.033830761    | 0.145535453      | EVA1A |  |  |
| 2                                                      | 75469302                                             | 75569722       | - 2744           |       |  |  |
| protein_coding                                         | "eva-1 homolog A, regulator of programmed cell death | [Source:HGNC   |                  |       |  |  |
| Symbol;Acc:HGNC:25816]"                                | -                                                    | 695 989        | 834              |       |  |  |
| 456                                                    | 900 568                                              | 13.85145547    | 15.89081393      |       |  |  |
| 14.07940817                                            | 8.034927309                                          | 14.29278958    | 9.662961841      |       |  |  |
| ENSG00000155367                                        | 20.82531016                                          | 10.19646255    | 3.911193665      |       |  |  |
| 25.11445555                                            | 52.09001301                                          | 34.34254318    | 11.64432213      |       |  |  |
| 37.18233725                                            | -1.688520154                                         | 0.033834827    | 0.145535453      | PPM1J |  |  |
| 1                                                      | 112709994                                            | 112715477      | - 2874           |       |  |  |

|                 |                                              |             |                                     |                                     |             |                |            |
|-----------------|----------------------------------------------|-------------|-------------------------------------|-------------------------------------|-------------|----------------|------------|
| protein_coding  | "protein phosphatase, Mg2+/Mn2+ dependent 1J |             |                                     |                                     |             |                |            |
|                 | [Source:HGNC Symbol;Acc:HGNC:20785]"         | -           | 18                                  | 11                                  | 4           |                |            |
|                 | 25                                           | 57          | 35                                  | 0.342515677                         | 0.168748484 |                |            |
| 0.064472674     | 0.42058566                                   |             | 0.86426453                          | 0.568495873                         |             |                |            |
| ENSG00000218052 | 10.41265508                                  |             | 2.780853423                         | 4.888992081                         | 0           |                |            |
|                 | 0                                            | 0           | 6.027500195                         | 0                                   | 5.080545494 |                |            |
| 0.03388097      | 1                                            |             | ADAMTS7P4                           | 15                                  | 85255369    |                |            |
| 85330334        | -                                            |             | 5516                                | transcribed_unprocessed_pseudogene  |             |                |            |
|                 | ADAMTS7                                      |             | pseudogene 4                        | [Source:HGNC Symbol;Acc:HGNC:49410] |             |                |            |
|                 | -                                            | 9           | 3                                   | 5                                   | 0           | 0              | 0          |
| 0.089230426     | 0.023978994                                  |             | 0.041990225                         | 0                                   | 0           | 0              |            |
| ENSG00000267672 | 2.313923351                                  |             | 0                                   | 1.955596832                         | 11.05036044 |                |            |
|                 | 13.70789816                                  |             | 11.77458623                         | 1.423173395                         | 12.17761495 |                |            |
|                 | -3.127139623                                 |             | 0.033898537                         | 1                                   | AC010632.2  | 19             |            |
|                 | 37091341                                     |             | 37092564                            | +                                   | 1224        | sense_intronic |            |
|                 | novel transcript                             |             | -                                   | 2                                   | 0           | 2              | 11         |
|                 | 15                                           | 12          | 0.089360027                         | 0                                   | 0.075692184 |                |            |
| 0.434522714     | 0.534033423                                  |             | 0.457663064                         |                                     |             |                |            |
| ENSG00000116213 | 1147.705982                                  |             | 1353.348666                         | 1287.760514                         |             |                |            |
| 1612.348046     | 1589.202327                                  |             | 1490.466374                         | 1262.938387                         |             |                |            |
| 1564.005582     | -0.307973039                                 |             | 0.033968706                         | 0.146017849                         | WRAP73      |                |            |
|                 | 1                                            | 3630767     | 3652761                             | -                                   | 7604        | protein_coding | "WD        |
|                 | repeat containing, antisense to              |             | TP73                                | [Source:HGNC                        |             |                |            |
|                 | Symbol;Acc:HGNC:12759]"                      | -           | 992                                 | 1460                                | 1317        | 1605           | 1739       |
|                 | 1519                                         | 7.134512065 | 8.465345845                         | 8.023172368                         |             |                |            |
| 10.20549666     | 9.965889593                                  |             | 9.325276151                         |                                     |             |                |            |
| ENSG00000227376 | 1.156961676                                  |             | 9.269511408                         | 0                                   | 27.12361199 |                |            |
|                 | 13.70789816                                  |             | 22.56795695                         | 3.475491028                         | 21.1331557  |                |            |
|                 | -2.580266234                                 |             | 0.033974867                         | 0.146017849                         | FTH1P16     | 11             |            |
|                 | 77734475                                     |             | 77735026                            | -                                   | 552         |                |            |
|                 | processed_pseudogene                         |             | ferritin heavy chain 1              | pseudogene 16                       |             |                |            |
|                 | [Source:HGNC Symbol;Acc:HGNC:3986]           | -           | 1                                   | 10                                  | 0           |                |            |
|                 | 27                                           | 15          | 23                                  | 0.099073073                         | 0.79872059  | 0              |            |
|                 | 2.364971453                                  |             | 1.184161069                         | 1.945068023                         |             |                |            |
| ENSG00000088386 | 6.941770054                                  |             | 9.269511408                         | 1.955596832                         | 0           |                |            |
|                 | 0                                            | 0           | 6.055626098                         | 0                                   | 5.091203566 |                |            |
| 0.033982655     | 1                                            |             | SLC15A1 13                          | 98683801                            | 98752654    |                |            |
|                 | -                                            | 4192        | protein_coding                      | solute carrier family 15            |             |                |            |
|                 | member 1                                     |             | [Source:HGNC Symbol;Acc:HGNC:10920] | -                                   | 6           | 10             |            |
|                 | 2                                            | 0           | 0                                   | 0.078275291                         | 0.10517504  |                |            |
|                 | 0.022100962                                  |             | 0                                   | 0                                   |             |                |            |
| ENSG00000157021 | 106.4404742                                  |             | 70.4482867                          | 46.93432398                         |             |                |            |
| 3.013734666     | 46.60685375                                  |             | 29.43646558                         | 74.60769495                         |             |                |            |
| 26.35235133     | 1.496362328                                  |             | 0.033998181                         | 0.146017849                         |             |                |            |
| FAM92A1P1       | 15                                           |             | 41163162                            | 41164374                            | +           | 890            |            |
|                 | unprocessed_pseudogene                       |             | family with sequence similarity 92  |                                     |             |                |            |
|                 | member A1                                    |             | pseudogene 1                        | [Source:HGNC Symbol;Acc:HGNC:32278] | -           |                |            |
|                 | 92                                           | 76          | 48                                  | 3                                   | 51          | 30             | 5.65317635 |
|                 | 3.764935528                                  |             | 2.49835234                          | 0.162979306                         | 2.497116287 |                |            |
|                 | 1.573538176                                  |             |                                     |                                     |             |                |            |

|                                          |                                                  |             |             |                |           |
|------------------------------------------|--------------------------------------------------|-------------|-------------|----------------|-----------|
| ENSG00000104529                          | 1903.201957                                      | 2876.32939  | 3381.226923 |                |           |
| 4121.784445                              | 2768.995429                                      | 4118.161535 | 2720.252757 |                |           |
| 3669.647136                              | -0.431480596                                     | 0.034004993 | 0.146017849 | EEF1D          |           |
| 8                                        | 143579697                                        | 143599541   | -           | 9390           |           |
| protein_coding                           | eukaryotic translation elongation factor 1 delta |             |             |                |           |
| [Source:HGNC Symbol;Acc:HGNC:3211]       | -                                                | 1645        | 3103        | 3458           |           |
| 4103                                     | 3030                                             | 4197        | 9.580651057 | 14.56968429    |           |
| 17.05932537                              | 21.12696638                                      | 14.06162895 | 20.86504918 |                |           |
| ENSG00000117501                          | 0                                                | 8.342560268 | 8.800185745 | 42.19228532    |           |
| 31.98509571                              | 8.830939675                                      | 5.714248671 | 27.66944024 |                |           |
| -2.257025768                             | 0.034012452                                      | 0.146017849 | MROH9       | 1              |           |
| 170935471                                | 171064765                                        | +           | 3831        | protein_coding |           |
| maestro heat like repeat family member 9 | [Source:HGNC                                     |             |             |                |           |
| Symbol;Acc:HGNC:26287]                   | -                                                | 0           | 9           | 9              | 42 35     |
| 9                                        | 0                                                | 0.103577236 | 0.108826037 | 0.530076261    |           |
| 0.398120454                              | 0.109667109                                      |             |             |                |           |
| ENSG00000144476                          | 64.78985384                                      | 5.561706845 | 3.911193665 |                |           |
| 9.041203998                              | 0                                                | 0.981215519 | 24.75425145 | 3.340806506    |           |
| 2.894767716                              | 0.034015696                                      | 0.146017849 | ACKR3       | 2              |           |
| 236567787                                | 236582358                                        | +           | 2258        | protein_coding |           |
| atypical chemokine receptor 3            | [Source:HGNC                                     |             |             |                |           |
| Symbol;Acc:HGNC:23692]                   | -                                                | 56          | 6           | 4              | 9 0       |
| 1                                        | 1.356309495                                      | 0.117155119 | 0.082061322 |                |           |
| 0.192716894                              | 0                                                | 0.020673885 |             |                |           |
| ENSG00000224870                          | 268.4151088                                      | 450.4982545 | 418.4977221 |                |           |
| 462.1059821                              | 539.1773277                                      | 614.2409152 | 379.1370284 |                |           |
| 538.508075                               | -0.504431599                                     | 0.034015874 | 0.146017849 |                |           |
| AL391244.1                               | 1                                                | 1399522     | 1402046     | +              | 2525      |
| processed_transcript                     | uncharacterized LOC148413 [Source:NCBI           |             |             |                |           |
| gene;Acc:148413]                         | -                                                | 232         | 486         | 428            | 460 590   |
| 626                                      | 5.024829328                                      | 8.48611367  | 7.85208229  |                |           |
| 8.808412929                              | 10.18237827                                      | 11.57334732 |             |                |           |
| ENSG00000162461                          | 17.35442514                                      | 7.415609127 | 16.62257307 |                |           |
| 36.16481599                              | 47.52071363                                      | 32.38011214 | 13.79753578 |                |           |
| 38.68854725                              | -1.494494914                                     | 0.034024668 | 0.146017849 |                |           |
| SLC25A34                                 | 1                                                | 15736405    | 15741396    | +              | 3195      |
| protein_coding                           | solute carrier family 25 member 34               |             |             |                |           |
| [Source:HGNC Symbol;Acc:HGNC:27653]      | -                                                | 15          | 8           | 17             |           |
| 36                                       | 52                                               | 33          | 0.256752753 | 0.110395935    |           |
| 0.246479336                              | 0.544794676                                      | 0.709236502 | 0.482157707 |                |           |
| ENSG00000121057                          | 1604.705844                                      | 1605.479376 | 1804.038078 |                |           |
| 2290.438346                              | 1944.693819                                      | 1953.600099 | 1671.407766 |                |           |
| 2062.910755                              | -0.303416641                                     | 0.034032943 | 0.146017849 | AKAP1          |           |
| 17                                       | 57085092                                         | 57121349    | +           | 5399           |           |
| protein_coding                           | A-kinase anchoring protein 1 [Source:HGNC        |             |             |                |           |
| Symbol;Acc:HGNC:367]                     | -                                                | 1387        | 1732        | 1845           | 2280 2128 |
| 1991                                     | 14.04940223                                      | 14.14387854 | 15.83016709 |                |           |
| 20.41844836                              | 17.17579682                                      | 17.21487876 |             |                |           |
| ENSG00000269907                          | 2.313923351                                      | 12.05036483 | 3.911193665 | 0              |           |
| 0                                        | 0                                                | 6.091827282 | 0           | 5.103647423    |           |



|                          |                                              |                        |                      |                |      |
|--------------------------|----------------------------------------------|------------------------|----------------------|----------------|------|
| 0.03403824               | 1                                            | AL158827.2             | 9                    | 96910076       |      |
| 96910405                 | +                                            | 330                    | processed_pseudogene | "prothymosin,  |      |
| alpha (PTMA) pseudogene" |                                              | -                      | 2                    | 13             | 4 0  |
| 0                        | 0                                            | 0.331444463            | 1.736854229          | 0.56149838     |      |
| 0                        | 0                                            | 0                      |                      |                |      |
| ENSG00000236609          | 236.0201818                                  | 390.2464303            | 351.0296314          |                |      |
| 293.3368408              | 572.0762833                                  | 634.8464411            | 325.7654145          |                |      |
| 500.0865217              | -0.617237239                                 | 0.034101716            | 0.146271868          | ZNF853         |      |
| 7                        | 6615617 6624290                              | +                      | 3857                 | protein_coding | zinc |
| finger protein           | 853 [Source:HGNC                             | Symbol;Acc:HGNC:21767] | zf-C2H2              | 204            |      |
| 421                      | 359 292                                      | 626 647                | 2.892512479          |                |      |
| 4.812452046              | 4.311687388                                  | 3.660449579            | 7.072668323          |                |      |
| 7.83070165               |                                              |                        |                      |                |      |
| ENSG00000133083          | 594.6783013                                  | 366.1457006            | 487.9214097          |                |      |
| 330.506235               | 383.8211485                                  | 311.0453197            | 482.9151372          |                |      |
| 341.7909011              | 0.496975086                                  | 0.034113961            | 0.146283342          | DCLK1          |      |
| 13                       | 35768652                                     | 36131306               | -                    | 14375          |      |
| protein_coding           | doublecortin like kinase 1                   | [Source:HGNC           |                      |                |      |
| Symbol;Acc:HGNC:2700]    | -                                            | 514 395                | 499 329              | 420            |      |
| 317                      | 1.95546469                                   | 1.211499391            | 1.608033707          |                |      |
| 1.106596421              | 1.273209982                                  | 1.02943148             |                      |                |      |
| ENSG00000135870          | 1136.136366                                  | 879.6766327            | 980.7318114          |                |      |
| 836.8136589              | 804.1966921                                  | 669.1889843            | 998.8482699          |                |      |
| 770.0664451              | 0.374597484                                  | 0.034143605            | 0.146343954          | RC3H1          |      |
| 1                        | 173931214                                    | 174022297              | -                    | 11508          |      |
| protein_coding           | ring finger and CCCH-type domains 1          | [Source:HGNC           |                      |                |      |
| Symbol;Acc:HGNC:29434]   | -                                            | 982 949                | 1003 833             | 880            |      |
| 682                      | 4.666662007                                  | 3.635802778            | 4.037416333          |                |      |
| 3.499825287              | 3.332279464                                  | 2.766499253            |                      |                |      |
| ENSG00000128973          | 518.3188307                                  | 640.5232383            | 660.9917293          |                |      |
| 518.3623626              | 374.6825497                                  | 451.359139             | 606.6112661          |                |      |
| 448.1346838              | 0.438094493                                  | 0.034147242            | 0.146343954          | CLN6           |      |
| 15                       | 68206992                                     | 68257211               | -                    | 7345           |      |
| protein_coding           | "CLN6, transmembrane ER protein              | [Source:HGNC           |                      |                |      |
| Symbol;Acc:HGNC:2077]"   | -                                            | 448 691                | 676 516              | 410            |      |
| 460                      | 3.335653468                                  | 4.147822902            | 4.263412475          |                |      |
| 3.39671507               | 2.432487708                                  | 2.923560378            |                      |                |      |
| ENSG00000152102          | 4047.051942                                  | 4086.000629            | 4540.895845          |                |      |
| 5305.177591              | 5055.472842                                  | 4814.824554            | 4224.649472          |                |      |
| 5058.491662              | -0.259804171                                 | 0.034176464            | 0.14642814           |                |      |
| FAM168B 2                | 131047876                                    | 131093460              | -                    | 5435           |      |
| protein_coding           | family with sequence similarity 168 member B | [Source:HGNC           |                      |                |      |
| Symbol;Acc:HGNC:27016]   | -                                            | 3498 4408              | 4644                 |                |      |
| 5281                     | 5532 4907                                    | 35.19775544            | 35.75822851          |                |      |
| 39.58176157              | 46.98052175                                  | 44.35486081            | 42.14659999          |                |      |
| ENSG00000257086          | 1.156961676                                  | 8.342560268            | 7.822387329          |                |      |
| 41.1877071               | 12.79403828                                  | 21.58674143            | 5.773969758          |                |      |
| 25.18949561              | -2.106643072                                 | 0.034274717            | 0.146807955          |                |      |
| AP001453.3               | 11 64246939                                  | 64249494               | -                    | 853            |      |
| lincRNA novel transcript |                                              | -                      | 1 9                  | 8              |      |

|                                     |                                     |                                     |              |                 |                |             |
|-------------------------------------|-------------------------------------|-------------------------------------|--------------|-----------------|----------------|-------------|
| 41                                  | 14                                  | 22                                  | 0.064112938  | 0.465186857     |                |             |
| 0.434453611                         | 2.323999563                         |                                     | 0.715216627  | 1.203981144     |                |             |
| ENSG00000169252                     | 3.470885027                         |                                     | 4.634755704  | 9.777984162     | 0              |             |
| 0                                   | 0                                   | 5.961208298                         | 0            | 5.07008405      |                |             |
| 0.034276556                         | 1                                   | ADRB2                               | 5            | 148825245       | 148828687      |             |
| +                                   | 3443                                | protein_coding                      | adrenoceptor | beta 2          |                |             |
| [Source:HGNC Symbol;Acc:HGNC:286]   |                                     |                                     | -            | 3               | 5              | 10          |
| 0                                   | 0                                   | 0                                   | 0.04765176   | 0.064027558     |                |             |
| 0.13454434                          | 0                                   | 0                                   | 0            |                 |                |             |
| ENSG00000249690                     | 0                                   | 0                                   | 0            | 3.013734666     | 5.483159264    |             |
| 9.812155195                         | 0                                   | 6.103016375                         |              | -5.029465935    |                |             |
| 0.034278484                         | 1                                   | AC110813.1                          | 4            | 150579089       |                |             |
| 150581545                           | +                                   | 2209                                | antisense    | uncharacterized |                |             |
| LOC729558                           | [Source:NCBI gene;Acc:729558]       |                                     | -            | 0               | 0              | 0           |
| 3                                   | 6                                   | 10                                  | 0            | 0               | 0              | 0.065663912 |
| 0.118362501                         |                                     | 0.211324729                         |              |                 |                |             |
| ENSG00000186073                     | 468.5694787                         |                                     | 345.7527755  | 362.7632124     |                |             |
| 213.9751613                         | 318.9370972                         |                                     | 285.5337162  | 392.3618222     |                |             |
| 272.8153249                         | 0.5224575                           |                                     | 0.034288228  | 0.146820539     |                |             |
| C15orf41                            | 15                                  | 36579611                            |              | 36810248        | +              | 9293        |
|                                     | protein_coding                      | chromosome 15 open reading frame 41 |              |                 |                |             |
| [Source:HGNC Symbol;Acc:HGNC:26929] |                                     |                                     | -            | 405             | 373            | 371         |
| 213                                 | 349                                 | 291                                 | 2.383382789  | 1.769647849     |                |             |
| 1.849355607                         | 1.108217191                         |                                     | 1.636545512  | 1.461783608     |                |             |
| ENSG00000128965                     | 97.18478076                         |                                     | 154.8008405  | 123.2026004     |                |             |
| 117.535652                          | 300.6598997                         |                                     | 226.660785   | 125.0627406     |                |             |
| 214.9521122                         | -0.780240342                        |                                     | 0.034309899  | 0.146820539     |                | CHAC1       |
| 15                                  | 40952962                            |                                     | 40956519     | +               | 2058           |             |
| protein_coding                      | ChaC                                | glutathione specific gamma-         |              |                 |                |             |
| glutamylcyclotransferase 1          | [Source:HGNC Symbol;Acc:HGNC:28680] |                                     | -            |                 |                |             |
| 84                                  | 167                                 | 126                                 | 117          | 329             | 231            | 2.232176997 |
| 3.577709373                         |                                     | 2.836139774                         |              | 2.748790922     |                | 6.966411516 |
| 5.239775083                         |                                     |                                     |              |                 |                |             |
| ENSG00000165724                     | 748.5542042                         |                                     | 908.412118   | 753.8825789     |                |             |
| 955.3538891                         | 1007.987445                         |                                     | 1119.566908  | 803.6163004     |                |             |
| 1027.636081                         | -0.354203862                        |                                     | 0.03431997   | 0.146820539     |                |             |
| ZMYND19                             | 9                                   | 137582079                           |              | 137590490       | -              | 2372        |
| protein_coding                      | zinc finger MYND-type containing 19 | [Source:HGNC                        |              |                 |                |             |
| Symbol;Acc:HGNC:21146]              |                                     |                                     | -            | 647             | 980            | 771         |
| 1141                                | 14.91709683                         |                                     | 18.21567835  | 15.05712824     | 951            | 1103        |
| 19.3850555                          | 20.26373165                         |                                     | 22.45520352  |                 |                |             |
| ENSG00000059804                     | 992.6731178                         |                                     | 926.0241897  | 589.6124449     |                |             |
| 1113.07267                          | 1409.171931                         |                                     | 932.1547435  | 836.1032508     |                |             |
| 1151.466448                         | -0.462378049                        |                                     | 0.034330398  | 0.146820539     |                | SLC2A3      |
| 12                                  | 7919230                             | 7936275                             | -            | 6159            | protein_coding | solute      |
| carrier family 2 member 3           | [Source:HGNC Symbol;Acc:HGNC:11007] |                                     | -            |                 |                |             |
| 858                                 | 999                                 | 603                                 | 1108         | 1542            | 950            | 7.618540779 |
| 7.151369898                         |                                     | 4.535337009                         |              | 8.698227709     |                | 10.91020139 |
| 7.200446652                         |                                     |                                     |              |                 |                |             |
| ENSG00000135916                     | 618.9744965                         |                                     | 1027.061864  | 1277.98253      |                |             |

|                        |                                               |              |             |       |
|------------------------|-----------------------------------------------|--------------|-------------|-------|
| 685.1223474            | 686.3087679                                   | 719.2309758  | 974.6729635 |       |
| 696.8873637            | 0.484893168                                   | 0.034337898  | 0.146820539 | ITM2C |
| 2                      | 230864639                                     | 230879248    | + 2611      |       |
| protein_coding         | integral membrane protein 2C                  | [Source:HGNC |             |       |
| Symbol;Acc:HGNC:6175]  | -                                             | 535 1108     | 1307 682    | 751   |
| 733                    | 11.2057679                                    | 18.70970098  | 23.18842073 |       |
| 12.6292837             | 12.53405693                                   | 13.10518447  |             |       |
| ENSG00000140395        | 715.0023156                                   | 654.4275054  | 635.5689705 |       |
| 424.9365879            | 562.9376845                                   | 527.8939495  | 668.3329305 |       |
| 505.256074             | 0.402764055                                   | 0.034339815  | 0.146820539 | WDR61 |
| 15                     | 78277835                                      | 78299794     | - 7279      |       |
| protein_coding         | WD repeat domain 61                           | [Source:HGNC |             |       |
| Symbol;Acc:HGNC:30300] | -                                             | 618 706      | 650 423     | 616   |
| 538                    | 4.643136683                                   | 4.276287933  | 4.136605386 |       |
| 2.809764134            | 3.687801958                                   | 3.450297886  |             |       |
| ENSG00000166734        | 2483.996718                                   | 2083.786165  | 2013.286939 |       |
| 1779.108031            | 1933.727501                                   | 1552.282952  | 2193.68994  |       |
| 1755.039495            | 0.321401864                                   | 0.034344884  | 0.146820539 | CASC4 |
| 15                     | 44288729                                      | 44415758     | + 7095      |       |
| protein_coding         | cancer susceptibility 4                       | [Source:HGNC |             |       |
| Symbol;Acc:HGNC:24892] | -                                             | 2147 2248    | 2059 1771   | 2116  |
| 1582                   | 16.54909913                                   | 13.9694036   | 13.44331585 |       |
| 12.06889136            | 12.99636385                                   | 10.40878685  |             |       |
| ENSG00000168404        | 422.2910116                                   | 422.6897202  | 385.252576  |       |
| 543.4768181            | 527.2971493                                   | 548.4994754  | 410.0777693 |       |
| 539.7578143            | -0.396522751                                  | 0.03437852   | 0.14692324  | MLKL  |
| 16                     | 74671855                                      | 74700960     | - 5692      |       |
| protein_coding         | mixed lineage kinase domain like pseudokinase | [Source:HGNC |             |       |
| Symbol;Acc:HGNC:26617] | -                                             | 365 456      |             | 394   |
| 541                    | 577 559                                       | 3.506894378  | 3.53210747  |       |
| 3.206518768            | 4.595508674                                   | 4.417428405  | 4.584510295 |       |
| ENSG00000076513        | 1492.480562                                   | 1249.530138  | 1414.874308 |       |
| 936.2669029            | 1141.410987                                   | 1198.064149  | 1385.628336 |       |
| 1091.914013            | 0.343188133                                   | 0.034388972  | 0.146926833 |       |
| ANKRD13A               | 12 109999186                                  | 110039763    | + 7350      |       |
| protein_coding         | ankyrin repeat domain 13A                     | [Source:HGNC |             |       |
| Symbol;Acc:HGNC:21268] | -                                             | 1290 1348    | 1447 932    | 1249  |
| 1221                   | 9.598361088                                   | 8.08605165   | 9.119765007 |       |
| 6.130978452            | 7.40514722                                    | 7.754867122  |             |       |
| ENSG00000182871        | 702.2757372                                   | 619.2033621  | 1961.463623 |       |
| 618.8201848            | 309.7984984                                   | 435.6596906  | 1094.314241 |       |
| 454.759458             | 1.267042968                                   | 0.034402348  | 0.146942915 |       |
| COL18A1 21             | 45405137                                      | 45513720     | + 8525      |       |
| protein_coding         | collagen type XVIII alpha 1 chain             | [Source:HGNC |             |       |
| Symbol;Acc:HGNC:2195]  | -                                             | 607 668      | 2006 616    | 339   |
| 444                    | 3.893937855                                   | 3.454745285  | 10.9003137  |       |
| 3.493715535            | 1.732861721                                   | 2.431277989  |             |       |
| ENSG00000075303        | 760.1238209                                   | 831.4751733  | 662.9473262 |       |
| 463.1105604            | 712.8107044                                   | 471.9646649  | 751.5154401 |       |
| 549.2953099            | 0.451658881                                   | 0.034457687  | 0.147138175 |       |

|                                                                                                                         |              |             |             |                        |                     |
|-------------------------------------------------------------------------------------------------------------------------|--------------|-------------|-------------|------------------------|---------------------|
| SLC25A40                                                                                                                | 7            | 87833568    | 87876357    | -                      | 5081                |
| protein_coding solute carrier family 25 member 40                                                                       |              |             |             |                        |                     |
| [Source:HGNC Symbol;Acc:HGNC:29680]                                                                                     | -            | 657         | 897         | 678                    |                     |
| 461                                                                                                                     | 780          | 481         | 7.071489281 | 7.783540797            |                     |
| 6.18134459                                                                                                              | 4.386851638  | 6.689659385 | 4.419182299 |                        |                     |
| ENSG00000112679                                                                                                         | 320.4783842  | 490.3571535 | 349.0740346 |                        |                     |
| 538.453927                                                                                                              | 560.1961049  | 504.344777  | 386.6365241 |                        |                     |
| 534.331603                                                                                                              | -0.465283539 | 0.034514145 | 0.147329822 | DUSP22                 |                     |
| 6                                                                                                                       | 291630       | 351355      | +           | 5686                   | protein_coding dual |
| specificity phosphatase 22 [Source:HGNC Symbol;Acc:HGNC:16077]                                                          |              |             |             |                        |                     |
| 277                                                                                                                     | 529          | 357         | 536         | 613                    | 514                 |
| 4.101878335                                                                                                             | 2.90846483   | 4.557840791 | 4.697991394 |                        |                     |
| 4.21990136                                                                                                              |              |             |             |                        |                     |
| ENSG00000267796                                                                                                         | 16.19746346  | 29.66243651 | 33.24514615 |                        |                     |
| 27.12361199                                                                                                             | 74.02265007  | 93.21547435 | 26.36834871 |                        |                     |
| 64.78724547                                                                                                             | -1.292751278 | 0.034521844 | 0.147329822 | LIN37                  |                     |
| 19                                                                                                                      | 35748361     | 35754519    | +           | 2820                   |                     |
| protein_coding lin-37 DREAM MuvB core complex component [Source:HGNC Symbol;Acc:HGNC:33234]                             |              |             |             |                        |                     |
| 95                                                                                                                      | 0.271502379  | 0.500304982 | 0.558511686 |                        | 81                  |
| 0.462930582                                                                                                             | 1.251683445  | 1.572608189 |             |                        |                     |
| ENSG00000267470                                                                                                         | 3.470885027  | 7.415609127 | 6.844588913 | 0                      |                     |
| 0                                                                                                                       | 0            | 5.910361022 | 0           | 5.058335747            |                     |
| 0.034550889                                                                                                             | 1            | ZNF571-AS1  | 19          | 37548914               |                     |
| 37587348                                                                                                                | +            | 4560        | antisense   | ZNF571 antisense RNA 1 |                     |
| [Source:HGNC Symbol;Acc:HGNC:44324]                                                                                     | -            |             |             | 3                      | 8                   |
| 0                                                                                                                       | 0            | 0           | 0.035979169 | 0.077349783            | 7                   |
| 0.071110815                                                                                                             | 0            | 0           | 0           |                        |                     |
| ENSG00000124549                                                                                                         | 84.45820233  | 109.3802346 | 143.7363672 |                        |                     |
| 43.19686355                                                                                                             | 56.6593124   | 81.44088812 | 112.5249347 |                        |                     |
| 60.43235469                                                                                                             | 0.898155326  | 0.034563481 | 0.14746635  |                        |                     |
| BTN2A3P 6                                                                                                               | 26421391     | 26432383    | +           | 4177                   |                     |
| transcribed_unprocessed_pseudogene "butyrophilin subfamily 2 member A3, pseudogene [Source:HGNC Symbol;Acc:HGNC:13229]" |              |             |             |                        |                     |
| 73                                                                                                                      | 118          | 147         | 43          | 62                     | 83                  |
| 1.24552225                                                                                                              | 1.630254153  | 0.497743041 | 0.646823533 |                        |                     |
| 0.927597678                                                                                                             |              |             |             |                        |                     |
| ENSG00000146463                                                                                                         | 2686.465011  | 2137.549331 | 2264.581132 |                        |                     |
| 2080.481498                                                                                                             | 1867.01573   | 1761.281857 | 2362.865158 |                        |                     |
| 1902.926362                                                                                                             | 0.311991572  | 0.034582039 | 0.147504361 | ZMYM4                  |                     |
| 1                                                                                                                       | 35268967     | 35422058    | +           | 7647                   |                     |
| protein_coding zinc finger MYM-type containing 4 [Source:HGNC Symbol;Acc:HGNC:13055]                                    |              |             |             |                        |                     |
| 1795                                                                                                                    | 16.60603076  | 13.29542335 | 14.02974962 | 2043                   |                     |
| 13.09453935                                                                                                             | 11.64222194  | 10.95769981 |             |                        |                     |
| ENSG00000214842                                                                                                         | 0            | 0           | 0.977798416 | 15.06867333            |                     |
| 5.483159264                                                                                                             | 2.943646558  | 0.325932805 |             |                        |                     |
| 7.831826384                                                                                                             | -4.426230879 | 0.034590745 | 1           | RAD51AP2               |                     |
| 2                                                                                                                       | 17510584     | 17518439    | -           | 3724                   |                     |
| protein_coding RAD51 associated protein 2 [Source:HGNC                                                                  |              |             |             |                        |                     |

|                                      |                                                    |             |             |             |      |        |
|--------------------------------------|----------------------------------------------------|-------------|-------------|-------------|------|--------|
| Symbol;Acc:HGNC:34417]               | -                                                  | 0           | 0           | 1           | 15   | 6      |
| 3                                    | 0                                                  | 0           | 0.01243921  | 0.194752393 |      |        |
| 0.070210194                          | 0.037606041                                        |             |             |             |      |        |
| ENSG00000088387                      | 1861.551336                                        | 1848.340575 | 1354.250806 |             |      |        |
| 2347.699305                          | 2015.06103                                         | 2059.571375 | 1688.047572 |             |      |        |
| 2140.777237                          | -0.342907443                                       | 0.034593976 | 0.147514118 |             |      | DOCK9  |
| 13                                   | 98793429                                           | 99086625    | -           | 14816       |      |        |
| protein_coding                       | dedicator of cytokinesis 9 [Source:HGNC            |             |             |             |      |        |
| Symbol;Acc:HGNC:14132]               | -                                                  | 1609        | 1994        | 1385        | 2337 | 2205   |
| 2099                                 | 5.939088372                                        | 5.933734942 | 4.330332653 |             |      |        |
| 7.62656471                           | 6.485391861                                        | 6.613441329 |             |             |      |        |
| ENSG00000184260                      | 41.65062033                                        | 30.58938765 | 11.73358099 | 0           |      |        |
| 10.96631853                          | 6.868508636                                        | 27.99119632 | 5.944942388 |             |      |        |
| 2.22583057                           | 0.034657048                                        | 0.147692509 | HIST2H2AC   |             |      |        |
| 1                                    | 149886975                                          | 149887364   | +           | 390         |      |        |
| protein_coding                       | histone cluster 2 H2A family member c [Source:HGNC |             |             |             |      |        |
| Symbol;Acc:HGNC:4738]                | -                                                  | 36          | 33          | 12          | 0    | 12     |
| 7                                    | 5.048154132                                        | 3.730639557 | 1.42534204  | 0           |      |        |
| 1.340834688                          | 0.837875456                                        |             |             |             |      |        |
| ENSG00000065882                      | 1330.505927                                        | 1310.708913 | 1685.724469 |             |      |        |
| 958.3676238                          | 1240.107854                                        | 1170.590115 | 1442.313103 |             |      |        |
| 1123.021864                          | 0.360932381                                        | 0.034660794 | 0.147692509 |             |      | TBC1D1 |
| 4                                    | 37891087                                           | 38139175    | +           | 9032        |      |        |
| protein_coding                       | TBC1 domain family member 1 [Source:HGNC           |             |             |             |      |        |
| Symbol;Acc:HGNC:11578]               | -                                                  | 1150        | 1414        | 1724        | 954  | 1357   |
| 1193                                 | 6.963196069                                        | 6.902389115 | 8.842107454 |             |      |        |
| 5.1069977                            | 6.547183549                                        | 6.165986231 |             |             |      |        |
| ENSG00000275700                      | 2763.981443                                        | 3366.686544 | 3075.176019 |             |      |        |
| 3675.751714                          | 3381.281546                                        | 4310.479777 | 3068.614669 |             |      |        |
| 3789.171013                          | -0.304001324                                       | 0.034668604 | 0.147692509 |             |      | AATF   |
| 17                                   | 36948875                                           | 37056871    | +           | 4714        |      |        |
| protein_coding                       | apoptosis antagonizing transcription factor        |             |             |             |      |        |
| [Source:HGNC Symbol;Acc:HGNC:19235]  | -                                                  |             | 2389        | 3632        |      | 3145   |
| 3659                                 | 3700                                               | 4393        | 27.71540851 | 33.96958331 |      |        |
| 30.90534012                          | 37.52960969                                        | 34.20351532 | 43.5028451  |             |      |        |
| ENSG00000261819                      | 3.470885027                                        | 32.44328993 | 17.60037149 |             |      |        |
| 66.30216265                          | 48.4345735                                         | 41.21105182 | 17.83818215 |             |      |        |
| 51.98259599                          | -1.530398395                                       | 0.034674456 | 0.147692509 |             |      |        |
| AC138932.3                           | 16                                                 | 14988259    | 14990160    | -           |      | 1902   |
| processed_pseudogene                 | uncharacterized protein KIAA2013                   |             |             |             |      |        |
| [Source:NCBI gene;Acc:102724984]     | -                                                  |             | 3           | 35          |      | 18     |
| 66                                   | 53                                                 | 42          | 0.086259206 | 0.811318707 |      |        |
| 0.438393845                          | 1.677778557                                        | 1.214294295 | 1.030824694 |             |      |        |
| ENSG00000144736                      | 1679.908353                                        | 1409.892685 | 1570.344256 |             |      |        |
| 1837.373568                          | 1846.910812                                        | 2062.515022 | 1553.381765 |             |      |        |
| 1915.599801                          | -0.302759511                                       | 0.034698122 | 0.147706495 |             |      | SHQ1   |
| 3                                    | 72749277                                           | 72861914    | -           | 5841        |      |        |
| protein_coding                       | "SHQ1, H/ACA ribonucleoprotein assembly factor     |             |             |             |      |        |
| [Source:HGNC Symbol;Acc:HGNC:25543]" | -                                                  |             | 1452        | 1521        |      | 1606   |
| 1829                                 | 2021                                               | 2102        | 13.59484069 | 11.48090083 |      |        |

|                 |                                                                                     |             |             |             |
|-----------------|-------------------------------------------------------------------------------------|-------------|-------------|-------------|
| 12.73681352     | 15.14006416                                                                         | 15.07779051 | 16.79931375 |             |
| ENSG00000110092 | 8490.941738                                                                         | 8582.640613 | 6302.888591 |             |
| 8806.132694     | 9370.719183                                                                         | 10939.57183 | 7792.156981 |             |
| 9705.474568     | -0.316817061                                                                        | 0.03471236  | 0.147706495 | CCND1       |
| 11              | 69641087                                                                            | 69654474    | + 4830      |             |
| protein_coding  | cyclin D1 [Source:HGNC Symbol;Acc:HGNC:1582]                                        |             |             | -           |
| 7339            | 9259                                                                                | 6446        | 8766        | 10254       |
|                 | 11149                                                                               | 83.09683252 |             |             |
|                 | 84.5183308                                                                          | 61.82236662 | 87.75170269 | 92.51342938 |
|                 | 107.7543522                                                                         |             |             |             |
| ENSG00000247596 | 947.5516124                                                                         | 1379.303298 | 1240.82619  |             |
| 1376.272164     | 1565.44197                                                                          | 1661.197874 | 1189.227033 |             |
| 1534.304003     | -0.366793349                                                                        | 0.034712801 | 0.147706495 | TWF2        |
| 3               | 52228610                                                                            | 52239260    | - 1824      |             |
| protein_coding  | twinfilin actin binding protein 2 [Source:HGNC Symbol;Acc:HGNC:9621]                |             |             | -           |
| 1693            | 24.55578264                                                                         | 35.96764931 | 32.22843701 | 1713        |
| 36.31591155     | 40.9252298                                                                          | 43.32894952 |             |             |
| ENSG00000106367 | 853.8377167                                                                         | 1478.48707  | 1231.048206 |             |
| 1406.409511     | 1553.561792                                                                         | 1801.511694 | 1187.790997 |             |
| 1587.160999     | -0.417283439                                                                        | 0.034723196 | 0.147706495 | AP1S1       |
| 7               | 101154400                                                                           | 101161596   | + 1756      |             |
| protein_coding  | adaptor related protein complex 1 subunit sigma 1 [Source:HGNC Symbol;Acc:HGNC:559] |             |             | -           |
| 1400            | 1700                                                                                | 1836        | 22.98405028 | 40.04701346 |
| 33.21266113     | 38.54825654                                                                         | 42.18742398 | 48.80835841 |             |
| ENSG00000198833 | 1103.741439                                                                         | 1153.127219 | 1258.426562 |             |
| 640.9209057     | 1085.665534                                                                         | 907.6243555 | 1171.765073 |             |
| 878.0702652     | 0.415982063                                                                         | 0.034728532 | 0.147706495 | UBE2J1      |
| 6               | 89326625                                                                            | 89352848    | - 4290      |             |
| protein_coding  | ubiquitin conjugating enzyme E2 J1 [Source:HGNC Symbol;Acc:HGNC:17598]              |             |             | -           |
| 925             | 12.16146223                                                                         | 12.78489148 | 13.89708489 | 1188        |
| 7.190591268     | 12.06751219                                                                         | 10.06538697 |             |             |
| ENSG00000061676 | 6988.048521                                                                         | 5336.457718 | 5155.931048 |             |
| 4725.535956     | 5023.487746                                                                         | 4349.728398 | 5826.812429 |             |
| 4699.584033     | 0.309931332                                                                         | 0.034735713 | 0.147706495 | NCKAP1      |
| 2               | 182909115                                                                           | 183038858   | - 22520     |             |
| protein_coding  | NCK associated protein 1 [Source:HGNC Symbol;Acc:HGNC:7666]                         |             |             | -           |
| 4433            | 14.6677421                                                                          | 11.27098317 | 10.84655545 | 5497        |
| 10.09950628     | 10.63692136                                                                         | 9.189150849 |             |             |
| ENSG00000077380 | 2327.806892                                                                         | 2077.297507 | 2162.890097 |             |
| 1750.979841     | 1825.892035                                                                         | 1834.873021 | 2189.331498 |             |
| 1803.914966     | 0.279083856                                                                         | 0.034749188 | 0.147722702 |             |
| DYNC1I2         | 2                                                                                   | 171687409   | 171748420   | + 4695      |
| protein_coding  | dynein cytoplasmic 1 intermediate chain 2 [Source:HGNC Symbol;Acc:HGNC:2964]        |             |             | -           |
| 1870            | 23.43619444                                                                         | 21.04457783 | 21.8248859  | 1998        |
| 17.94994024     | 18.54464333                                                                         | 18.5931103  |             |             |
| ENSG00000232859 | 5.784808379                                                                         | 50.05536161 | 12.71137941 |             |

|                                 |                                            |                        |             |             |              |
|---------------------------------|--------------------------------------------|------------------------|-------------|-------------|--------------|
| 65.29758443                     | 86.81668835                                | 43.17348286            | 22.85051646 |             |              |
| 65.09591855                     | -1.500160664                               | 0.034772179            | 0.147779344 | LYRM9       |              |
| 17                              | 27878314                                   | 27894752               | -           | 5380        |              |
| protein_coding                  | LYR motif containing 9 [Source:HGNC        |                        |             |             |              |
| Symbol;Acc:HGNC:27314]          | -                                          | 5                      | 54          | 13          | 65           |
| 44                              | 0.050825591                                | 0.442532776            | 0.111934389 | 95          |              |
| 0.584160648                     | 0.769484591                                | 0.381782868            |             |             |              |
| ENSG00000285618                 | 2.313923351                                | 0                      | 1.955596832 | 9.041203998 |              |
| 22.84649694                     | 5.887293117                                | 1.423173395            | 12.59166468 |             |              |
| -3.175809449                    | 0.034778298                                | 1                      | AC074132.1  | 5           |              |
| 91132303                        | 91142470                                   | -                      | 687         | antisense   |              |
| "novel transcript, antisense to | ADGRV1"                                    | -                      | 2           | 0           |              |
| 2                               | 9                                          | 25                     | 6           | 0.159209131 | 0            |
| 0.134857689                     | 0.633413024                                | 1.585776105            | 0.407699848 |             |              |
| ENSG00000163431                 | 10.41265508                                | 1.853902282            | 5.866790497 | 0           |              |
| 0                               | 0                                          | 6.044449287            | 0           | 5.084492982 |              |
| 0.034800397                     | 1                                          | LMOD1                  | 1           | 201896452   | 201946588    |
| -                               | 3971                                       | protein_coding         | leiomod     | 1           | [Source:HGNC |
| Symbol;Acc:HGNC:6647]           | -                                          | 9                      | 2           | 6           | 0            |
| 0                               | 0.123947375                                | 0.022205679            | 0.069992873 | 0           |              |
| 0                               | 0                                          |                        |             |             |              |
| ENSG00000213414                 | 0                                          | 0                      | 27.12361199 | 0           | 0            |
| 0                               | 9.041203998                                | -5.594847411           | 0.03486326  | 1           |              |
| AC008677.1                      | 5                                          | 157986146              | 157987706   | -           |              |
| 1561                            | processed_pseudogene                       | cell                   | division    | cycle       | 37           |
| (S. cerevisiae)                 | (CDC37 )                                   | pseudogene             | -           | 0           | 0            |
| 27                              | 0                                          | 0                      | 0           | 0           | 0.836299963  |
| 0                               | 0                                          |                        |             |             |              |
| ENSG00000221990                 | 57.84808379                                | 127.9192574            | 91.91305112 |             |              |
| 120.5493866                     | 171.805657                                 | 194.2806729            | 92.56013078 |             |              |
| 162.2119055                     | -0.80555819                                | 0.034876504            | 0.148142754 | EXOC3-      |              |
| AS1                             | 5                                          | 441498                 | 443160      | -           | 1663         |
| antisense RNA 1                 | [Source:HGNC                               | Symbol;Acc:HGNC:25175] | -           | 50          |              |
| 138                             | 94                                         | 120                    | 188         | 198         | 1.644267481  |
| 3.658649409                     | 2.618412467                                | 3.488913589            | 4.926337909 |             |              |
| 5.55800556                      |                                            |                        |             |             |              |
| ENSG00000176946                 | 1167.374331                                | 1426.577806            | 1319.050063 |             |              |
| 1449.606374                     | 1705.262531                                | 1750.488487            | 1304.334067 |             |              |
| 1635.119131                     | -0.32567573                                | 0.03487707             | 0.148142754 | THAP4       |              |
| 2                               | 241584405                                  | 241637449              | -           | 3147        |              |
| protein_coding                  | THAP domain containing 4 [Source:HGNC      |                        |             |             |              |
| Symbol;Acc:HGNC:23187]          | THAP                                       | 1009                   | 1539        | 1349        | 1443         |
| 1784                            | 17.5343284                                 | 21.56134431            | 19.85718411 | 1866        |              |
| 22.17026094                     | 25.83886865                                | 26.4633087             |             |             |              |
| ENSG00000242641                 | 8.09873173                                 | 11.12341369            | 0.977798416 |             |              |
| 30.13734666                     | 33.81281546                                | 17.66187935            | 6.733314612 |             |              |
| 27.20401383                     | -2.014992873                               | 0.03488988             | 0.148155998 |             |              |
| LINC00971                       | 3                                          | 84638406               | 84881679    | -           | 8031         |
| lincRNA                         | long intergenic non-protein coding RNA 971 |                        |             |             |              |
| [Source:HGNC                    | Symbol;Acc:HGNC:48737]                     | -                      | 7           | 12          | 1            |

|                        |                                                   |             |             |             |             |      |
|------------------------|---------------------------------------------------|-------------|-------------|-------------|-------------|------|
| 0.005768101            | 30                                                | 37          | 18          | 0.047667582 | 0.065878785 |      |
| ENSG00000101442        | 391.0530464                                       | 0.180614597 | 0.200766245 | 0.104628239 |             |      |
| 532.4264577            | 597.6643598                                       | 397.6620394 | 405.7863427 |             |             |      |
| 531.7289912            | -0.417456629                                      | 465.0961562 | 398.1671428 |             |             |      |
|                        | 20                                                | 38748442    | 38772520    | +           | 2565        |      |
| protein_coding         | ARP5 actin related protein 5 homolog [Source:HGNC |             |             |             |             |      |
| Symbol;Acc:HGNC:14671] | -                                                 | 338         | 429         | 415         | 530         | 654  |
|                        | 474                                               | 7.206494235 | 7.374012691 | 7.494854101 |             |      |
| 9.990557338            | 11.11089329                                       | 8.626547303 |             |             |             |      |
| ENSG00000275835        | 816.8149431                                       | 741.5609127 | 807.6614917 |             |             |      |
| 630.8751234            | 523.6417098                                       | 669.1889843 | 788.6791158 |             |             |      |
| 607.9019392            | 0.375698936                                       | 0.034915842 | 0.14818392  |             |             |      |
| TUBGCP5                | 15                                                | 22983192    | 23039673    | -           | 6478        |      |
| protein_coding         | tubulin gamma complex associated protein 5        |             |             |             |             |      |
| [Source:HGNC           | Symbol;Acc:HGNC:18600]                            | -           | 706         | 800         |             | 826  |
|                        | 628                                               | 573         | 682         | 5.96016757  | 5.444813409 |      |
| 5.90665438             | 4.687269414                                       | 3.854537508 | 4.914614604 |             |             |      |
| ENSG00000119787        | 992.6731178                                       | 918.6085806 | 939.6642779 |             |             |      |
| 661.0124701            | 794.1442335                                       | 784.9724156 | 950.3153254 |             |             |      |
| 746.7097064            | 0.34737932                                        | 0.034936226 | 0.148215589 |             |             | ATL2 |
|                        | 2                                                 | 38294880    | 38377285    | -           | 4884        |      |
| protein_coding         | atlastin GTPase 2 [Source:HGNC                    |             |             |             |             |      |
| Symbol;Acc:HGNC:24047] | -                                                 | 858         | 991         | 961         | 658         | 869  |
|                        | 800                                               |             |             |             |             |      |
| 9.607410454            | 8.946063102                                       | 9.114863898 | 6.514055506 |             |             |      |
| 7.753587975            | 7.646459059                                       |             |             |             |             |      |
| ENSG00000125503        | 1132.665481                                       | 1951.232151 | 1979.063994 |             |             |      |
| 2184.957633            | 1997.697692                                       | 2611.995713 | 1687.653875 |             |             |      |
| 2264.883679            | -0.423714293                                      | 0.034942695 | 0.148215589 |             |             |      |
| PPP1R12C               | 19                                                | 55090913    | 55117559    | -           | 7726        |      |
| protein_coding         | protein phosphatase 1 regulatory subunit 12C      |             |             |             |             |      |
| [Source:HGNC           | Symbol;Acc:HGNC:14947]                            | -           | 979         | 2105        |             | 2024 |
|                        | 2175                                              | 2186        | 2662        | 6.929831914 | 12.0124434  |      |
| 12.13551636            | 13.61149331                                       | 12.32974377 | 16.08419698 |             |             |      |
| ENSG00000114127        | 1323.564157                                       | 916.7546783 | 1247.670779 |             |             |      |
| 820.7404074            | 950.4142725                                       | 907.6243555 | 1162.663205 |             |             |      |
| 892.9263451            | 0.380046523                                       | 0.034953837 | 0.148221723 |             |             | XRN1 |
|                        | 3                                                 | 142306607   | 142448062   | -           | 11982       |      |
| protein_coding         | 5'-3' exoribonuclease 1 [Source:HGNC              |             |             |             |             |      |
| Symbol;Acc:HGNC:30654] | -                                                 | 1144        | 989         | 1276        | 817         | 1040 |
|                        | 925                                               | 5.221453587 | 3.63915819  | 4.933144251 |             |      |
| 3.296810296            | 3.782357908                                       | 3.603781515 |             |             |             |      |
| ENSG00000102290        | 473.1973254                                       | 413.4202088 | 615.0352038 |             |             |      |
| 425.9411661            | 344.5251738                                       | 295.3458714 | 500.5509127 |             |             |      |
| 355.2707371            | 0.494843665                                       | 0.034982578 | 0.148302459 |             |             |      |
| PCDH11X                | X                                                 | 91779261    | 92623230    | +           | 11630       |      |
| protein_coding         | protocadherin 11 X-linked [Source:HGNC            |             |             |             |             |      |
| Symbol;Acc:HGNC:8656]  | -                                                 | 409         | 446         | 629         | 424         | 377  |
|                        | 301                                               | 1.923261359 | 1.690787786 | 2.505378733 |             |      |
| 1.762736342            | 1.412603354                                       | 1.208183267 |             |             |             |      |



|                                                  |                                                                             |             |                |                  |             |      |      |
|--------------------------------------------------|-----------------------------------------------------------------------------|-------------|----------------|------------------|-------------|------|------|
| ENSG00000260563                                  | 93.71389573                                                                 | 86.2064561  | 73.33488121    |                  |             |      |      |
| 134.6134818                                      | 132.5096822                                                                 | 149.144759  | 84.41841101    |                  |             |      |      |
| 138.7559743                                      | -0.718036635                                                                | 0.035011411 | 0.148383542    |                  |             |      |      |
| AC132872.1                                       | 17                                                                          | 82293716    | 82294910       | +                | 1195        |      |      |
| lincRNA                                          | novel transcript                                                            | -           | 81             | 93               | 75          |      |      |
| 134                                              | 145                                                                         | 152         | 3.70690816     | 3.431223449      |             |      |      |
| 2.907339936                                      | 5.42173279                                                                  | 5.287601227 | 5.937747405    |                  |             |      |      |
| ENSG00000231948                                  | 8.09873173                                                                  | 4.634755704 | 4.888992081    |                  | 0           |      |      |
| 0                                                | 0                                                                           | 5.874159838 | 0              | 5.045285904      |             |      |      |
| 0.035029844                                      | 1                                                                           | HS1BP3-IT1  | 2              | 20590775         |             |      |      |
| 20592548                                         | -                                                                           | 600         | sense_intronic | HS1BP3 intronic  |             |      |      |
| transcript 1 [Source:HGNC Symbol;Acc:HGNC:41474] |                                                                             |             |                | -                | 7           |      |      |
| 5                                                | 5                                                                           | 0           | 0              | 0                | 0.638030592 |      |      |
| 0.367411471                                      | 0.386030136                                                                 | 0           | 0              | 0                |             |      |      |
| ENSG00000284431                                  | 8.09873173                                                                  | 4.634755704 | 4.888992081    |                  | 0           |      |      |
| 0                                                | 0                                                                           | 5.874159838 | 0              | 5.045285904      |             |      |      |
| 0.035029844                                      | 1                                                                           | AL022238.4  | 22             | 40346529         |             |      |      |
| 40410054                                         | +                                                                           | 4563        | protein_coding | novel transcript |             |      |      |
| -                                                | 7                                                                           | 5           | 5              | 0                | 0           |      |      |
| 0.083896199                                      | 0.048311831                                                                 | 0.050760044 | 0              | 0                | 0           |      |      |
| ENSG00000243679                                  | 68.26073887                                                                 | 120.5036483 | 118.3136084    |                  |             |      |      |
| 159.7279373                                      | 145.3037205                                                                 | 208.9989056 | 102.3593318    |                  |             |      |      |
| 171.3435212                                      | -0.739451326                                                                | 0.035030346 | 0.148422646    |                  |             |      |      |
| AC018638.5                                       | 7                                                                           | 128653969   | 128654722      | +                | 754         |      |      |
| processed_pseudogene                             | novel pseudogene                                                            |             |                | -                | 59          |      |      |
| 130                                              | 121                                                                         | 159         | 159            | 213              | 4.27932606  |      |      |
| 7.601616652                                      | 7.433895987                                                                 | 10.19593352 | 9.189341179    |                  |             |      |      |
| 13.18725164                                      |                                                                             |             |                |                  |             |      |      |
| ENSG00000119402                                  | 2474.741024                                                                 | 2269.176393 | 2219.602405    |                  |             |      |      |
| 2875.102871                                      | 2720.560855                                                                 | 2793.520584 | 2321.173274    |                  |             |      |      |
| 2796.39477                                       | -0.268905343                                                                | 0.035041095 | 0.14842705     |                  | FBXW2       |      |      |
| 9                                                | 120751978                                                                   | 120793412   | -              | 11263            |             |      |      |
| protein_coding                                   | F-box and WD repeat domain containing 2 [Source:HGNC Symbol;Acc:HGNC:13608] | -           | 2139           | 2448             | 2270        | 2862 | 2977 |
| 2847                                             | 10.38607401                                                                 | 9.582774915 | 9.336287759    |                  |             |      |      |
| 12.28617683                                      | 11.5181664                                                                  | 11.79992967 |                |                  |             |      |      |
| ENSG00000115091                                  | 7049.36749                                                                  | 6054.844852 | 5594.962537    |                  |             |      |      |
| 4471.377666                                      | 5862.411114                                                                 | 4751.045545 | 6233.058293    |                  |             |      |      |
| 5028.278108                                      | 0.309667477                                                                 | 0.03505737  | 0.148435314    |                  | ACTR3       |      |      |
| 2                                                | 113889960                                                                   | 113962596   | +              | 12049            |             |      |      |
| protein_coding                                   | ARP3 actin related protein 3 homolog [Source:HGNC Symbol;Acc:HGNC:170]      | -           | 6093           | 6532             | 5722        | 4451 | 6415 |
| 4842                                             | 27.65507792                                                                 | 23.90171863 | 21.99881588    |                  |             |      |      |
| 17.86108373                                      | 23.20086912                                                                 | 18.7594377  |                |                  |             |      |      |
| ENSG00000165650                                  | 1397.609704                                                                 | 1265.288307 | 1375.762372    |                  |             |      |      |
| 1842.396459                                      | 1774.715882                                                                 | 1437.480736 | 1346.220128    |                  |             |      |      |
| 1684.864359                                      | -0.323948465                                                                | 0.035062466 | 0.148435314    |                  | PDZD8       |      |      |
| 10                                               | 117277274                                                                   | 117375467   | -              | 9881             |             |      |      |
| protein_coding                                   | PDZ domain containing 8 [Source:HGNC Symbol;Acc:HGNC:26974]                 | -           | 1208           | 1365             | 1407        | 1834 | 1942 |

|                                                     |                                                     |             |              |             |
|-----------------------------------------------------|-----------------------------------------------------|-------------|--------------|-------------|
| 1465                                                | 6.685913411                                         | 6.090678983 | 6.596227928  |             |
| 8.974280682                                         | 8.564596834                                         | 6.921221708 |              |             |
| ENSG00000133393                                     | 1021.59716                                          | 1053.943447 | 1004.198973  |             |
| 761.4702923                                         | 931.2232151                                         | 716.2873292 | 1026.57986   |             |
| 802.9936122                                         | 0.354086117                                         | 0.035102077 | 0.148561864  | FOPNL       |
| 16                                                  | 15865720                                            | 15888625    | - 2391       |             |
| protein_coding                                      | FGFR10P N-terminal like [Source:HGNC                |             |              |             |
| Symbol;Acc:HGNC:26435]                              | -                                                   | 883 1137    | 1027 758     | 1019        |
| 730                                                 | 20.19648727                                         | 20.96596452 | 19.89726221  |             |
| 15.32818897                                         | 18.57176611                                         | 14.25244323 |              |             |
| ENSG00000141098                                     | 778.6352078                                         | 787.9084697 | 1089.267436  |             |
| 1198.461819                                         | 1175.223802                                         | 1075.412209 | 885.270371   |             |
| 1149.699277                                         | -0.3767048                                          | 0.03512547  | 0.148619725  | GFOD2       |
| 16                                                  | 67674531                                            | 67719421    | - 8674       |             |
| protein_coding                                      | glucose-fructose oxidoreductase domain containing 2 |             |              |             |
| [Source:HGNC                                        | Symbol;Acc:HGNC:28159]                              |             |              |             |
| 1193                                                | 1286 1096                                           | 4.24316929  | 4.320494592  | 1114        |
| 5.949332323                                         | 6.650009142                                         | 6.460708529 | 5.898440083  |             |
| ENSG00000108433                                     | 1332.81985                                          | 1256.945747 | 1281.893724  |             |
| 1643.489971                                         | 1741.816926                                         | 1417.856426 | 1290.553107  |             |
| 1601.054441                                         | -0.311303832                                        | 0.035153157 | 0.148695715  | GOSR2       |
| 17                                                  | 46923075                                            | 46975524    | + 14366      |             |
| protein_coding                                      | golgi SNAP receptor complex member 2 [Source:HGNC   |             |              |             |
| Symbol;Acc:HGNC:4431]                               | -                                                   | 1152 1356   | 1311 1636    | 1906        |
| 1445                                                | 4.385421382                                         | 4.16157557  | 4.227360503  |             |
| 5.506157802                                         | 5.78156792                                          | 4.695458655 |              |             |
| ENSG00000199691                                     | 0                                                   | 2.780853423 | 5.866790497  | 24.10987733 |
| 12.79403828                                         | 15.69944831                                         | 2.882547973 | 17.53445464  |             |
| -2.581091737                                        | 0.035164816                                         | 1           | RN7SKP173    | 20          |
| 38761528                                            | 38761842                                            | +           | 315 misc_RNA |             |
| "RNA, 7SK small nuclear pseudogene 173 [Source:HGNC | Symbol;Acc:HGNC:45897]"                             |             |              |             |
| 16                                                  | 0                                                   | 0.419898825 | 0.882354596  | 3.683849714 |
| 1.936761216                                         | 2.371130542                                         |             |              |             |
| ENSG0000010404                                      | 8655.230296                                         | 6940.083192 | 5275.222455  |             |
| 8682.569573                                         | 10380.53435                                         | 7821.268906 | 6956.845314  |             |
| 8961.457609                                         | -0.365468055                                        | 0.035207338 | 0.148883701  | IDS         |
| X                                                   | 149476990                                           | 149521096   | - 9292       |             |
| protein_coding                                      | iduronate 2-sulfatase [Source:HGNC                  |             |              |             |
| Symbol;Acc:HGNC:5389]                               | -                                                   | 7481 7487   | 5395 8643    | 11359       |
| 7971                                                | 44.02964322                                         | 35.52487758 | 26.89581468  |             |
| 44.97348355                                         | 53.27083401                                         | 40.0451241  |              |             |
| ENSG00000127415                                     | 387.5821614                                         | 380.0499677 | 415.5643269  |             |
| 580.6462123                                         | 466.0685375                                         | 531.8188116 | 394.3988187  |             |
| 526.1778538                                         | -0.415509791                                        | 0.03523779  | 0.148971267  | IDUA        |
| 4                                                   | 986997 1004506                                      | +           | 4000         |             |
| protein_coding                                      | "iduronidase, alpha-L- [Source:HGNC                 |             |              |             |
| Symbol;Acc:HGNC:5391]"                              | -                                                   | 335 410     | 425 578      | 510         |
| 542                                                 | 4.580148176                                         | 4.519161099 | 4.921884233  |             |
| 6.986651223                                         | 5.556083738                                         | 6.325361211 |              |             |

|                                                         |                                                      |             |             |        |
|---------------------------------------------------------|------------------------------------------------------|-------------|-------------|--------|
| ENSG00000105711                                         | 94.87085741                                          | 152.0199871 | 130.0471893 |        |
| 40.18312888                                             | 98.69686676                                          | 62.79779325 | 125.6460113 |        |
| 67.22592963                                             | 0.901721659                                          | 0.035254888 | 0.14900234  | SCN1B  |
| 19                                                      | 35030466                                             | 35040449    | + 7993      |        |
| protein_coding                                          | sodium voltage-gated channel beta subunit 1          |             |             |        |
| [Source:HGNC Symbol;Acc:HGNC:10586]                     | -                                                    | 82          | 164         | 133    |
| 40                                                      | 108 64                                               | 0.561046364 | 0.904623766 |        |
| 0.770804575                                             | 0.241964356                                          | 0.588806425 | 0.373780118 |        |
| ENSG0000020129                                          | 1575.781802                                          | 2332.20907  | 2208.846622 |        |
| 2856.015885                                             | 2195.091426                                          | 2854.355946 | 2038.945832 |        |
| 2635.154419                                             | -0.369447544                                         | 0.035279379 | 0.149061024 | NCDN   |
| 1                                                       | 35557473                                             | 35567274    | + 4917      |        |
| protein_coding                                          | neurochondrin [Source:HGNC Symbol;Acc:HGNC:17597]    |             |             |        |
| -                                                       | 1362 2516                                            | 2259 2843   | 2402 2909   |        |
| 15.14856909                                             | 22.56027486                                          | 21.28229596 | 27.95618256 |        |
| 21.28782996                                             | 27.6178298                                           |             |             |        |
| ENSG00000269896                                         | 24.29619519                                          | 29.66243651 | 36.1785414  |        |
| 72.32963199                                             | 67.62563093                                          | 52.00442253 | 30.04572437 |        |
| 63.98656182                                             | -1.08802728                                          | 0.035292492 | 0.149061024 |        |
| AL513477.1                                              | 1 2350414                                            | 2352820 -   | 2407        |        |
| transcribed_processed_pseudogene                        | small nuclear                                        |             |             |        |
| ribonucleoprotein polypeptide N pseudogene [Source:NCBI |                                                      |             |             |        |
| gene;Acc:100129534]                                     | -                                                    | 21 32       | 37 72       | 74     |
| 53                                                      | 0.477131311                                          | 0.586148754 | 0.712078855 |        |
| 1.446297457                                             | 1.339720575                                          | 1.027888045 |             |        |
| ENSG00000139233                                         | 821.4427898                                          | 988.1299161 | 842.8622347 |        |
| 1177.365676                                             | 1089.320974                                          | 1080.318287 | 884.1449802 |        |
| 1115.668312                                             | -0.334933277                                         | 0.035317853 | 0.149061024 | LLPH   |
| 12                                                      | 66116555                                             | 66130768    | - 7993      |        |
| protein_coding                                          | "LLP homolog, long-term synaptic facilitation factor |             |             |        |
| [Source:HGNC Symbol;Acc:HGNC:28229]"                    | -                                                    | 710         | 1066        | 862    |
| 1172                                                    | 1192 1101                                            | 4.857840469 | 5.880054477 |        |
| 4.995740931                                             | 7.089555639                                          | 6.498678319 | 6.430186093 |        |
| ENSG00000138336                                         | 163.1315963                                          | 126.0653552 | 141.7807703 |        |
| 115.5264955                                             | 63.97019142                                          | 71.62873292 | 143.6592406 |        |
| 83.70847329                                             | 0.779560318                                          | 0.035327173 | 0.149061024 | TET1   |
| 10                                                      | 68560656                                             | 68694482    | + 9288      |        |
| protein_coding                                          | tet methylcytosine dioxygenase 1 [Source:HGNC        |             |             |        |
| Symbol;Acc:HGNC:29484]                                  | -                                                    | 141 136     | 145 115     | 70     |
| 73                                                      | 0.830216994                                          | 0.64558088  | 0.723183071 |        |
| 0.598655325                                             | 0.328423656                                          | 0.366899136 |             |        |
| ENSG00000186020                                         | 426.9188583                                          | 482.0145932 | 341.2516472 |        |
| 591.6965728                                             | 532.7803085                                          | 561.2552771 | 416.7283663 |        |
| 561.9107195                                             | -0.430958407                                         | 0.035333848 | 0.149061024 | ZNF529 |
| 19                                                      | 36534774                                             | 36605276    | - 8173      |        |
| protein_coding                                          | zinc finger protein 529 [Source:HGNC                 |             |             |        |
| Symbol;Acc:HGNC:29328]                                  | zf-C2H2                                              | 369 520     | 349 589     | 583    |
| 572                                                     | 2.46910512                                           | 2.805148149 | 1.978091532 |        |
| 3.484456221                                             | 3.108462651                                          | 3.267085993 |             |        |
| ENSG00000007255                                         | 160.8176729                                          | 380.9769189 | 204.359869  |        |

|                                     |              |                                     |                                     |              |             |
|-------------------------------------|--------------|-------------------------------------|-------------------------------------|--------------|-------------|
| 332.5153915                         | 425.8587029  | 406.2232251                         | 248.7181536                         |              |             |
| 388.1991065                         | -0.639891212 | 0.035334637                         | 0.149061024                         |              |             |
| TRAPPC6A                            | 19           | 45162928                            | 45178237                            | -            | 933         |
| protein_coding                      | trafficking  | protein                             | particle                            | complex      | 6A          |
| [Source:HGNC Symbol;Acc:HGNC:23069] | -            | 139                                 | 411                                 |              | 209         |
| 331                                 | 466          | 414                                 | 8.147565663                         | 19.42200833  |             |
| 10.37688726                         | 17.15329539  | 21.76521045                         | 20.71403631                         |              |             |
| ENSG00000164615                     | 657.1542318  | 788.8354209                         | 600.3682275                         |              |             |
| 937.2714811                         | 1007.987445  | 750.6298724                         | 682.1192934                         |              |             |
| 898.6295994                         | -0.397458602 | 0.035337028                         | 0.149061024                         |              | CAMLG       |
| 5                                   | 134738501    | 134752160                           | +                                   | 2221         |             |
| protein_coding                      | calcium      | modulating                          | ligand                              | [Source:HGNC |             |
| Symbol;Acc:HGNC:1471]               | -            | 568                                 | 851                                 | 614          | 933         |
| 765                                 | 13.98603111  | 16.89331809                         | 12.80625863                         |              | 1103        |
| 20.31114009                         | 21.64140994  | 16.07899545                         |                                     |              |             |
| ENSG00000229051                     | 8.09873173   | 2.780853423                         | 6.844588913                         |              | 0           |
| 0                                   | 0            | 5.908058022                         | 0                                   | 5.053240353  |             |
| 0.035377642                         | 1            | LINC01788                           | 1                                   | 70706453     |             |
| 70786468                            | +            | 2086                                | lincRNA                             | long         | intergenic  |
| coding RNA                          | 1788         | [Source:HGNC Symbol;Acc:HGNC:52577] | -                                   |              | 7           |
| 3                                   | 7            | 0                                   | 0                                   | 0            | 0.183517907 |
| 0.063407541                         | 0.155448377  | 0                                   | 0                                   | 0            |             |
| ENSG00000176731                     | 439.6454368  | 490.3571535                         | 429.2535047                         |              |             |
| 351.6023777                         | 330.8172756  | 330.6696301                         | 453.085365                          |              |             |
| 337.6964278                         | 0.424515157  | 0.035386997                         | 0.149230627                         |              |             |
| C8orf59                             | 8            | 85214076                            | 85220421                            | -            | 2514        |
| protein_coding                      | chromosome   | 8                                   | open                                | reading      | frame       |
| Symbol;Acc:HGNC:32235]              | -            | 380                                 | 529                                 | 439          | 350         |
| 337                                 | 8.266335658  | 9.277358874                         | 8.089127908                         |              | 362         |
| 6.731378131                         | 6.274828998  | 6.257641277                         |                                     |              |             |
| ENSG00000280020                     | 38.1797353   | 34.29719221                         | 26.40055724                         |              |             |
| 67.30674088                         | 62.14247166  | 73.59116396                         | 32.95916158                         |              |             |
| 67.6801255                          | -1.039871765 | 0.035408461                         | 0.149279961                         |              |             |
| AC116407.3                          | 17           | 32178946                            | 32180074                            | -            | 1129        |
| TEC                                 | TEC          | -                                   | 33                                  | 37           | 27          |
| 75                                  | 1.598507619  | 1.444913139                         | 1.107827848                         |              | 68          |
| 2.869340427                         | 2.624663118  | 3.101082765                         |                                     |              |             |
| ENSG00000266242                     | 0            | 4.634755704                         | 16.62257307                         | 0            | 0           |
| 0                                   | 7.08577626   | 0                                   | 5.320772943                         | 0.035485454  |             |
| 1                                   | GRAMD4P7     | 18                                  | 14485806                            | 14487501     |             |
| +                                   | 1232         | processed_pseudogene                | GRAM                                | domain       | containing  |
| 4                                   | pseudogene   | 7                                   | [Source:HGNC Symbol;Acc:HGNC:49142] | -            | 0           |
| 5                                   | 17           | 0                                   | 0                                   | 0            | 0.178934158 |
| 0.639205745                         | 0            | 0                                   | 0                                   |              |             |
| ENSG00000213190                     | 2129.966445  | 1630.507057                         | 1877.372959                         |              |             |
| 1588.238169                         | 1554.475651  | 1353.096201                         | 1879.282154                         |              |             |
| 1498.603341                         | 0.32608933   | 0.035529105                         | 0.14974729                          |              | MLLT11      |
| 1                                   | 151057758    | 151068497                           | +                                   | 4075         |             |
| protein_coding                      | "MLLT11,     | transcription                       | factor                              | 7            | cofactor    |
| Symbol;Acc:HGNC:16997]"             | -            | 1841                                | 1759                                | 1920         | 1581        |
|                                     |              |                                     |                                     |              | 1701        |

|                        |                              |              |             |                        |                |
|------------------------|------------------------------|--------------|-------------|------------------------|----------------|
| 1379                   | 24.70704966                  | 19.03146341  | 21.82609652 |                        |                |
| 18.75881815            | 18.19010887                  | 15.79729357  |             |                        |                |
| ENSG00000161677        | 271.8859938                  | 704.482867   | 489.8770065 |                        |                |
| 650.9666879            | 644.2712136                  | 916.4552952  | 488.7486224 |                        |                |
| 737.2310655            | -0.591216484                 | 0.035555554  | 0.149817463 | JOSD2                  |                |
| 19                     | 50505998                     | 50511353     | -           | 1514                   |                |
| protein_coding         | Josephin domain containing 2 | [Source:HGNC |             |                        |                |
| Symbol;Acc:HGNC:28853] | -                            | 235          | 760         | 501                    | 648            |
| 934                    | 8.488612326                  | 22.13205165  | 15.32901702 |                        | 705            |
| 20.69428125            | 20.29185917                  | 28.79831229  |             |                        |                |
| ENSG00000251361        | 48.59239038                  | 21.31987624  | 86.04626062 |                        |                |
| 19.08698622            | 13.70789816                  | 25.51160351  | 51.98617575 |                        |                |
| 19.43549596            | 1.420290788                  | 0.035584933  | 0.149899939 |                        |                |
| AC012625.1             | 5                            | 93019663     | 93068669    | -                      | 625            |
| lincRNA                | novel transcript             | -            | 42          | 23                     | 88             |
| 19                     | 15                           | 26           | 3.675056208 | 1.622489058            |                |
| 6.522365177            | 1.469856036                  | 1.045851056  | 1.941955914 |                        |                |
| ENSG00000154451        | 89.08604903                  | 146.4582803  | 126.1359957 |                        |                |
| 63.28842799            | 90.47212786                  | 41.21105182  | 120.5601083 |                        |                |
| 64.99053589            | 0.891751743                  | 0.035595223  | 0.149901974 | GBP5                   |                |
| 1                      | 89258950                     | 89272804     | -           | 8143                   |                |
| protein_coding         | guanylate binding protein 5  | [Source:HGNC |             |                        |                |
| Symbol;Acc:HGNC:19895] | -                            | 77           | 158         | 129                    | 63             |
| 42                     | 0.517131512                  | 0.855473597  | 0.733850731 |                        | 99             |
| 0.374073834            | 0.529796833                  | 0.240774723  |             |                        |                |
| ENSG00000161956        | 447.7441685                  | 824.9865154  | 855.5736141 |                        |                |
| 931.2440118            | 962.2944509                  | 1065.600054  | 709.434766  |                        |                |
| 986.3795056            | -0.47410827                  | 0.03561194   | 0.149931073 | SENP3                  |                |
| 17                     | 7561875                      | 7571969      | +           | 3668                   | protein_coding |
| specific               | peptidase 3                  | [Source:HGNC |             | Symbol;Acc:HGNC:17862] | -              |
| 387                    | 890                          | 875          | 927         | 1053                   | 1086           |
| 10.69780402            | 11.05048099                  | 12.21944901  | 12.51000957 |                        |                |
| 13.82122491            |                              |              |             |                        |                |
| ENSG00000187140        | 26.61011854                  | 1.853902282  | 9.777984162 | 0                      |                |
| 1.827719755            | 1.962431039                  | 12.74733499  | 1.263383598 |                        |                |
| 3.319223942            | 0.035657934                  | 1            | FOXD3       | 1                      |                |
| 63323041               | 63325126                     | +            | 2086        | protein_coding         |                |
| forkhead               | box D3                       | [Source:HGNC |             | Symbol;Acc:HGNC:3804]  | Fork           |
| 2                      | 10                           | 0            | 2           | 2                      | 0.60298741     |
| 0.042271694            | 0.22206911                   | 0            | 0.041780563 | 0.044757078            |                |
| ENSG00000273669        | 27.76708022                  | 20.3929251   | 4.888992081 |                        |                |
| 87.39830532            | 36.5543951                   | 30.4176811   | 17.68299913 |                        |                |
| 51.45679384            | -1.546297523                 | 0.035658475  | 0.150044316 |                        |                |
| AC015819.1             | 18                           | 75073543     | 75074205    | +                      | 663            |
| lincRNA                | novel transcript             | -            | 24          | 22                     | 5              |
| 87                     | 40                           | 31           | 1.979668287 | 1.462995905            |                |
| 0.349348539            | 6.344639354                  | 2.629087623  | 2.182700768 |                        |                |
| ENSG00000246922        | 45.12150535                  | 61.1787753   | 51.82331606 |                        |                |
| 129.5905906            | 62.14247166                  | 110.8773537  | 52.70786557 |                        |                |
| 100.8701387            | -0.933186481                 | 0.035667904  | 0.150044316 | UBAP1L                 |                |

|                        |                                             |             |                          |             |                  |
|------------------------|---------------------------------------------|-------------|--------------------------|-------------|------------------|
| 15                     | 65092770                                    | 65115197    | -                        | 8536        |                  |
| protein_coding         | ubiquitin associated protein 1 like         |             |                          |             | [Source:HGNC     |
| Symbol;Acc:HGNC:40028] | -                                           | 39          | 66                       | 53          | 129 68           |
| 113                    | 0.249864705                                 | 0.340897242 | 0.287623203              |             |                  |
| 0.730695647            | 0.34714675                                  | 0.617973814 |                          |             |                  |
| ENSG00000185495        | 143.4632478                                 | 136.2618177 | 125.1581973              |             |                  |
| 65.29758443            | 84.07510872                                 | 93.21547435 | 134.9610876              |             |                  |
| 80.8627225             | 0.738090234                                 | 0.035668283 | 0.150044316              |             |                  |
| AC138393.1             | 1                                           | 223992743   | 224010612                | +           | 4349             |
|                        | transcribed_unprocessed_pseudogene          |             |                          |             | septin 7 (SEPT7) |
| pseudogene             | -                                           | 124         | 147                      | 128         | 65 92 95         |
| 1.559290347            | 1.490259452                                 | 1.363399146 | 0.722645272              |             |                  |
| 0.921843117            | 1.019718347                                 |             |                          |             |                  |
| ENSG00000108691        | 85.615164                                   | 107.5263323 | 123.2026004              |             |                  |
| 36.16481599            | 84.07510872                                 | 43.17348286 | 105.4480323              |             |                  |
| 54.47113586            | 0.951476725                                 | 0.035726427 | 0.150247562              |             | CCL2             |
| 17                     | 34255218                                    | 34257203    | +                        | 1986        |                  |
| protein_coding         | C-C motif chemokine ligand 2                |             |                          |             | [Source:HGNC     |
| Symbol;Acc:HGNC:10618] | -                                           | 74          | 116                      | 126         | 36 92            |
| 44                     | 2.037732576                                 | 2.575210314 | 2.938960552              |             |                  |
| 0.876444607            | 2.018678609                                 | 1.034235565 |                          |             |                  |
| ENSG00000136158        | 874.6630268                                 | 748.0495707 | 760.7271678              |             |                  |
| 860.9235363            | 1111.253611                                 | 1096.017735 | 794.4799218              |             |                  |
| 1022.731627            | -0.365130259                                | 0.035814305 | 0.150535561              |             | SPRY2            |
| 13                     | 80335976                                    | 80340951    | -                        | 3038        |                  |
| protein_coding         | sprouty RTK signaling antagonist 2          |             |                          |             | [Source:HGNC     |
| Symbol;Acc:HGNC:11270] | -                                           | 756         | 807                      | 778         | 857 1216         |
| 1117                   | 13.60907911                                 | 11.71169417 | 11.86299325              |             |                  |
| 13.63936868            | 17.44232616                                 | 17.16372073 |                          |             |                  |
| ENSG00000106868        | 49.74935206                                 | 71.37523785 | 126.1359957              |             |                  |
| 68.3113191             | 10.96631853                                 | 14.71823279 | 82.4201952               |             |                  |
| 31.33195681            | 1.399890441                                 | 0.035814603 | 0.150535561              |             | SUSD1            |
| 9                      | 112040785                                   | 112175408   | -                        | 4183        |                  |
| protein_coding         | sushi domain containing 1                   |             |                          |             | [Source:HGNC     |
| Symbol;Acc:HGNC:25413] | -                                           | 43          | 77                       | 129         | 68 12            |
| 15                     | 0.562179887                                 | 0.811590245 | 1.428579131              |             |                  |
| 0.785999491            | 0.125012079                                 | 0.167397678 |                          |             |                  |
| ENSG00000102763        | 871.1921418                                 | 739.7070104 | 840.9066379              |             |                  |
| 640.9209057            | 604.9752388                                 | 669.1889843 | 817.2685967              |             |                  |
| 638.3617096            | 0.356092387                                 | 0.035880911 | 0.15077281               |             | VWA8             |
| 13                     | 41566837                                    | 41961120    | -                        | 7633        |                  |
| protein_coding         | von Willebrand factor A domain containing 8 |             |                          |             | [Source:HGNC     |
| Symbol;Acc:HGNC:29071] | -                                           |             | 753                      | 798         | 860              |
| 638                    | 662                                         | 682         | 5.395036988              | 4.60937017  |                  |
| 5.219220494            | 4.041351571                                 | 3.779386651 | 4.170951579              |             |                  |
| ENSG00000250519        | 13.88354011                                 | 0.926951141 | 3.911193665              |             | 0                |
| 0                      | 0                                           | 6.240561638 | 0                        | 5.128578586 |                  |
| 0.035892316            | 1                                           | AP002784.1  | 11                       | 94238150    |                  |
| 94279206               | +                                           | 723         | lincRNA novel transcript |             | -                |
| 12                     | 1                                           | 4           | 0                        | 0           | 0.907690231      |

|                                         |                                                  |             |             |             |      |                        |
|-----------------------------------------|--------------------------------------------------|-------------|-------------|-------------|------|------------------------|
|                                         | 0.060981157                                      | 0.256285567 | 0           | 0           | 0    |                        |
| ENSG00000179362                         | 27.76708022                                      | 11.12341369 | 25.42275882 | 0           |      |                        |
|                                         | 7.310879019                                      | 4.906077597 | 21.43775091 | 4.072318872 |      |                        |
|                                         | 2.385353275                                      | 0.035896781 | 0.150798046 | HMG2P46     |      |                        |
|                                         | 15                                               | 45511136    | 45586290    | +           | 3091 |                        |
| transcribed_processed_pseudogene        |                                                  |             |             |             |      | high mobility group    |
| nucleosomal binding domain 2 pseudogene |                                                  |             |             |             |      | 46 [Source:HGNC        |
| Symbol;Acc:HGNC:26817]                  | -                                                | 24          | 12          | 26          | 0    | 8                      |
|                                         | 5                                                | 0.424626359 | 0.171165487 | 0.3896519   |      | 0                      |
|                                         | 0.112784542                                      | 0.075512185 |             |             |      |                        |
| ENSG00000116977                         | 780.9491311                                      | 628.4728735 | 523.1221526 |             |      |                        |
| 806.6763123                             | 1107.598171                                      | 725.1182689 | 644.1813857 |             |      |                        |
| 879.7975842                             | -0.450897326                                     | 0.035914087 | 0.150829298 |             |      | LGALS8                 |
|                                         | 1                                                | 236518000   | 236552981   | +           | 9710 |                        |
| protein_coding                          | galectin 8 [Source:HGNC                          |             |             |             |      | Symbol;Acc:HGNC:6569]  |
|                                         | 675                                              | 678         | 535         | 803         | 1212 | 739                    |
|                                         | 3.078537314                                      | 2.552331074 | 3.998503973 | 5.439287163 |      |                        |
|                                         | 3.552803961                                      |             |             |             |      |                        |
| ENSG00000055950                         | 911.6858005                                      | 1090.094542 | 977.7984162 |             |      |                        |
| 1131.155078                             | 1357.081918                                      | 1265.76802  | 993.1929194 |             |      |                        |
| 1251.335005                             | -0.332972187                                     | 0.03594848  | 0.150932275 |             |      | MRPL43                 |
|                                         | 10                                               | 100969458   | 100987515   | -           | 3573 |                        |
| protein_coding                          | mitochondrial ribosomal protein                  |             |             |             |      | L43 [Source:HGNC       |
| Symbol;Acc:HGNC:14517]                  | -                                                | 788         | 1176        | 1000        | 1126 | 1485                   |
|                                         | 1290                                             | 12.06112765 | 14.51136492 | 12.96490801 |      |                        |
| 15.23724992                             | 18.11140054                                      | 16.85398992 |             |             |      |                        |
| ENSG00000172663                         | 496.3365589                                      | 507.9692252 | 304.0953074 |             |      |                        |
| 566.5821172                             | 664.3761309                                      | 590.6917427 | 436.1336972 |             |      |                        |
| 607.2166636                             | -0.4780811                                       | 0.035958651 | 0.150933526 |             |      |                        |
| TMEM134                                 | 11                                               | 67461710    | 67469272    | -           | 5892 |                        |
| protein_coding                          | transmembrane protein                            |             |             |             |      | 134 [Source:HGNC       |
| Symbol;Acc:HGNC:26142]                  | -                                                | 429         | 548         | 311         | 564  | 727                    |
|                                         | 602                                              | 3.981890076 | 4.10064127  | 2.445119598 |      |                        |
| 4.628258232                             | 5.376879088                                      | 4.769576171 |             |             |      |                        |
| ENSG00000082641                         | 3569.22677                                       | 4032.237463 | 4762.856085 |             |      |                        |
| 4874.213533                             | 4958.603695                                      | 5308.37596  | 4121.440106 |             |      |                        |
| 5047.064396                             | -0.292103144                                     | 0.036006105 | 0.151072833 |             |      | NFE2L1                 |
|                                         | 17                                               | 48048329    | 48061487    | +           | 5825 |                        |
| protein_coding                          | "nuclear factor, erythroid 2 like 1 [Source:HGNC |             |             |             |      | Symbol;Acc:HGNC:7781]" |
| TF_bZIP                                 |                                                  | 3085        | 4350        | 4871        | 4852 | 5426                   |
|                                         | 5410                                             | 28.96369406 | 32.92511384 | 38.73688156 |      |                        |
| 40.27412178                             | 40.59218764                                      | 43.35581667 |             |             |      |                        |
| ENSG00000103044                         | 15.04050178                                      | 15.75816939 | 37.15633981 |             |      |                        |
| 79.36167954                             | 21.93263706                                      | 78.49724156 | 22.65167033 |             |      |                        |
| 59.93051939                             | -1.399597097                                     | 0.036011605 | 0.151072833 |             |      | HAS3                   |
|                                         | 16                                               | 69105564    | 69118719    | +           | 5289 |                        |
| protein_coding                          | hyaluronan synthase 3 [Source:HGNC               |             |             |             |      | Symbol;Acc:HGNC:4820]  |
|                                         | -                                                | 13          | 17          | 38          | 79   | 24                     |
|                                         | 80                                               | 0.134420188 | 0.141712876 | 0.332822352 |      |                        |
| 0.722195438                             | 0.197740793                                      | 0.706093894 |             |             |      |                        |

|                                           |                                                       |                 |             |             |  |
|-------------------------------------------|-------------------------------------------------------|-----------------|-------------|-------------|--|
| ENSG00000168785                           | 1440.417286                                           | 1123.464783     | 1271.137941 |             |  |
| 888.0471483                               | 925.7400558                                           | 1165.684037     | 1278.340003 |             |  |
| 993.1570804                               | 0.363722433                                           | 0.036053083     | 0.151205344 | TSPAN5      |  |
| 4                                         | 98470367                                              | 98658629        | - 7430      |             |  |
| protein_coding                            | tetraspanin 5 [Source:HGNC Symbol;Acc:HGNC:17753]     |                 |             |             |  |
| -                                         | 1245 1212                                             | 1300 884        | 1013 1188   |             |  |
| 9.163792578                               | 7.191968293                                           | 8.105074187     | 5.752606501 |             |  |
| 5.94126918                                | 7.464034923                                           |                 |             |             |  |
| ENSG00000146729                           | 2548.786572                                           | 1986.456295     | 1960.485824 |             |  |
| 1640.476237                               | 1966.626456                                           | 1512.053116     | 2165.242897 |             |  |
| 1706.385269                               | 0.34300837                                            | 0.036082465     | 0.151287064 |             |  |
| NIPSNAP2                                  | 7 55951793                                            | 56000181        | +           | 5651        |  |
| protein_coding                            | nipsnap homolog 2 [Source:HGNC                        |                 |             |             |  |
| Symbol;Acc:HGNC:4179]                     | -                                                     | 2203 2143       | 2005 1633   | 2152        |  |
| 1541                                      | 21.31983811                                           | 16.71979013     | 16.43582564 |             |  |
| 13.97211315                               | 16.59493507                                           | 12.72985237     |             |             |  |
| ENSG00000165943                           | 413.0353182                                           | 476.4528864     | 323.6512757 |             |  |
| 487.2204377                               | 785.9194946                                           | 467.0585873     | 404.3798268 |             |  |
| 580.0661732                               | -0.520886069                                          | 0.036109375     | 0.151358382 | MOAP1       |  |
| 14                                        | 93182196                                              | 93184928        | - 2537      |             |  |
| protein_coding                            | modulator of apoptosis 1 [Source:HGNC                 |                 |             |             |  |
| Symbol;Acc:HGNC:16658]                    | -                                                     | 357 514         | 331 485     | 860         |  |
| 476                                       | 7.695599569                                           | 8.932573733     | 6.043798581 |             |  |
| 9.24320293                                | 14.77190758                                           | 8.758556207     |             |             |  |
| ENSG00000170903                           | 1210.181913                                           | 1105.852711     | 941.6198748 |             |  |
| 1336.089035                               | 1561.786531                                           | 1245.162494     | 1085.884833 |             |  |
| 1381.012687                               | -0.347457837                                          | 0.036155931     | 0.151511986 |             |  |
| MSANTD4 11                                | 105995623                                             | 106022403       | - 5105      |             |  |
| protein_coding                            | Myb/SANT DNA binding domain containing 4 with coiled- |                 |             |             |  |
| coils [Source:HGNC Symbol;Acc:HGNC:29383] | -                                                     |                 | 1046 1193   |             |  |
| 963                                       | 1330 1709                                             | 1269 11.2054848 | 10.3033548  |             |  |
|                                           | 8.738421647                                           | 12.59670942     | 14.58830767 | 11.60411199 |  |
| ENSG00000084073                           | 3053.221862                                           | 2423.977233     | 2738.813364 |             |  |
| 2280.392564                               | 2227.990381                                           | 2214.603427     | 2738.67082  |             |  |
| 2240.995458                               | 0.289009902                                           | 0.036193259     | 0.151626841 |             |  |
| ZMPSTE24                                  | 1 40258107                                            | 40294184        | +           | 3572        |  |
| protein_coding                            | zinc metalloproteinase STE24 [Source:HGNC             |                 |             |             |  |
| Symbol;Acc:HGNC:12877]                    | -                                                     | 2639 2615       | 2801 2270   | 2438        |  |
| 2257                                      | 40.40384094                                           | 32.2770772      | 36.32487382 |             |  |
| 30.72667901                               | 29.74273138                                           | 29.49620512     |             |             |  |
| ENSG00000234756                           | 5.784808379                                           | 12.97731597     | 10.75578258 |             |  |
| 9.041203998                               | 49.34843338                                           | 44.15469838     | 9.839302309 |             |  |
| 34.18144525                               | -1.790270133                                          | 0.036235928     | 0.151673676 |             |  |
| AC024597.1                                | 10 62289521                                           | 62304033        | +           | 706         |  |
| lincRNA                                   | uncharacterized LOC105378325 [Source:NCBI             |                 |             |             |  |
| gene;Acc:105378325]                       | -                                                     | 5 14            | 11 9        | 54          |  |
| 45                                        | 0.387311165                                           | 0.874293587     | 0.721756062 |             |  |
| 0.616366498                               | 3.333094727                                           | 2.975458166     |             |             |  |
| ENSG00000134278                           | 812.1870964                                           | 835.1829779     | 765.6161599 |             |  |
| 1109.054357                               | 1075.613076                                           | 885.0563986     | 804.3287447 |             |  |



|                                                          |                                                      |             |             |        |
|----------------------------------------------------------|------------------------------------------------------|-------------|-------------|--------|
| 1023.241277                                              | -0.347318372                                         | 0.036240559 | 0.151673676 | SPIRE1 |
| 18                                                       | 12446512                                             | 12658134    | - 6532      |        |
| protein_coding                                           | spire type actin nucleation factor 1 [Source:HGNC    |             |             |        |
| Symbol;Acc:HGNC:30622]                                   | -                                                    | 702 901     | 783 1104    | 1177   |
| 902                                                      | 5.877405416                                          | 6.081526071 | 5.552876848 |        |
| 8.17192014                                               | 7.852155373                                          | 6.446238911 |             |        |
| ENSG00000130811                                          | 3843.426687                                          | 5721.142441 | 5460.026356 |        |
| 6167.105705                                              | 5643.998603                                          | 7276.694292 | 5008.198495 |        |
| 6362.599533                                              | -0.345058579                                         | 0.036243194 | 0.151673676 | EIF3G  |
| 19                                                       | 10115017                                             | 10119918    | - 3486      |        |
| protein_coding                                           | eukaryotic translation initiation factor 3 subunit G |             |             |        |
| [Source:HGNC Symbol;Acc:HGNC:3274]                       | -                                                    |             | 3322 6172   | 5584   |
| 6139                                                     | 6176 7416                                            | 52.11550592 | 78.06070919 |        |
| 74.20283233                                              | 85.14741488                                          | 77.20376894 | 99.30894637 |        |
| ENSG00000276337                                          | 23.13923351                                          | 5.561706845 | 40.08973506 |        |
| 6.027469332                                              | 4.569299387                                          | 4.906077597 | 22.93022514 |        |
| 5.167615439                                              | 2.149753659                                          | 0.036244694 | 0.151673676 |        |
| AC105429.1                                               | 16 87470370                                          | 87474370    | -           | 4001   |
| sense_intronic                                           | "novel transcript, sense intronic to ZCCHC14"        |             |             |        |
| -                                                        | 20 6                                                 | 41 6        | 5 5         |        |
| 0.273373339                                              | 0.066117535                                          | 0.474698393 | 0.072507664 |        |
| 0.054457795                                              | 0.058337456                                          |             |             |        |
| ENSG00000185485                                          | 163.1315963                                          | 198.3675441 | 242.4940072 |        |
| 118.5402302                                              | 116.9740643                                          | 152.0884055 | 201.3310492 |        |
| 129.2009                                                 | 0.641381323                                          | 0.036254047 | 0.151673676 | SDHAP1 |
| 3                                                        | 195959748                                            | 195990318   | - 3353      |        |
| transcribed_unprocessed_pseudogene                       | succinate dehydrogenase                              |             |             |        |
| complex flavoprotein subunit A pseudogene 1 [Source:HGNC |                                                      |             |             |        |
| Symbol;Acc:HGNC:32455]                                   | -                                                    | 141 214     | 248 118     | 128    |
| 155                                                      | 2.299748117                                          | 2.813935755 | 3.426262107 |        |
| 1.701569414                                              | 1.663546764                                          | 2.157963927 |             |        |
| ENSG00000126524                                          | 2254.918306                                          | 2117.156406 | 1708.213833 |        |
| 1540.018414                                              | 1676.932875                                          | 1661.197874 | 2026.762848 |        |
| 1626.049721                                              | 0.317490158                                          | 0.036291883 | 0.151746468 | SBDS   |
| 7                                                        | 66987677                                             | 66995601    | - 1732      |        |
| protein_coding                                           | "SBDS, ribosome maturation factor [Source:HGNC       |             |             |        |
| Symbol;Acc:HGNC:19440]"                                  | -                                                    | 1949 2284   | 1747 1533   | 1835   |
| 1693                                                     | 61.54016611                                          | 58.14095618 | 46.72480237 |        |
| 42.79524171                                              | 46.16860779                                          | 45.63048725 |             |        |
| ENSG00000100632                                          | 2179.715797                                          | 2729.87111  | 2860.060367 |        |
| 2051.348729                                              | 2131.121234                                          | 2109.613367 | 2589.882425 |        |
| 2097.36111                                               | 0.304665883                                          | 0.036297003 | 0.151746468 | ERH    |
| 14                                                       | 69380123                                             | 69398627    | - 1446      |        |
| protein_coding                                           | "ERH, mRNA splicing and mitosis factor [Source:HGNC  |             |             |        |
| Symbol;Acc:HGNC:3447]"                                   | -                                                    | 1884 2945   | 2925 2042   | 2332   |
| 2150                                                     | 71.25368315                                          | 89.79475382 | 93.70441059 |        |
| 68.2792373                                               | 70.27791216                                          | 69.40906639 |             |        |
| ENSG00000187514                                          | 17571.93393                                          | 19109.09777 | 20954.22006 |        |
| 15603.10894                                              | 16621.28345                                          | 16325.46381 | 19211.75059 |        |
| 16183.2854                                               | 0.24751383                                           | 0.036301225 | 0.151746468 | PTMA   |

|                         |                                                      |             |             |             |                     |
|-------------------------|------------------------------------------------------|-------------|-------------|-------------|---------------------|
| 2                       | 231706895                                            | 231713541   | +           | 3378        |                     |
| protein_coding          | prothymosin alpha [Source:HGNC Symbol;Acc:HGNC:9623] |             |             |             |                     |
| -                       | 15188                                                | 20615       | 21430       | 15532       | 18188 16638         |
| 245.8870497             | 269.0652748                                          | 293.8765831 | 222.3150956 |             |                     |
| 234.6301931             | 229.9256964                                          |             |             |             |                     |
| ENSG00000168874         | 24.29619519                                          | 31.51633879 | 26.40055724 |             |                     |
| 8.036625776             | 0                                                    | 10.79337071 | 27.40436374 | 6.276665497 |                     |
|                         | 2.134138582                                          | 0.036376881 | 0.151985064 | ATOH8       | 2                   |
|                         | 85751344                                             | 85788066    | +           | 6076        | protein_coding      |
|                         | atonal bHLH transcription factor 8 [Source:HGNC      |             |             |             |                     |
| Symbol;Acc:HGNC:24126]  | bHLH                                                 | 21          | 34          | 27          | 8 0                 |
| 11                      | 0.189014988                                          | 0.246714747 | 0.205848855 |             |                     |
| 0.063660997             | 0                                                    | 0.084512501 |             |             |                     |
| ENSG00000106636         | 4450.831566                                          | 4482.735717 | 4526.228868 |             |                     |
| 6019.432706             | 4950.378956                                          | 5206.329546 | 4486.598717 |             |                     |
| 5392.04707              | -0.265134616                                         | 0.036378187 | 0.151985064 | YKT6        |                     |
| 7                       | 44200968                                             | 44214294    | +           | 3707        |                     |
| protein_coding          | YKT6 v-SNARE homolog [Source:HGNC                    |             |             |             |                     |
| Symbol;Acc:HGNC:16959]  | -                                                    | 3847        | 4836        | 4629        | 5992 5417           |
| 5306                    | 56.75371736                                          | 57.51719049 | 57.84516318 |             |                     |
| 78.15386046             | 63.67879657                                          | 66.81757279 |             |             |                     |
| ENSG00000132953         | 1324.721119                                          | 1069.701617 | 1096.112025 |             |                     |
| 1046.770507             | 804.1966921                                          | 864.4508727 | 1163.511587 |             |                     |
| 905.1393574             | 0.36199264                                           | 0.036618282 | 0.15290855  | XP04        |                     |
| 13                      | 20777329                                             | 20903048    | -           | 10500       |                     |
| protein_coding          | expartin 4 [Source:HGNC Symbol;Acc:HGNC:17796]       |             |             |             |                     |
| 1145                    | 1154                                                 | 1121        | 1042        | 880         | 881 5.963632878     |
| 4.845632435             | 4.945597513                                          | 4.798214252 | 3.652178293 |             |                     |
| 3.916811265             |                                                      |             |             |             |                     |
| ENSG00000102858         | 1050.521202                                          | 1745.448998 | 1720.925212 |             |                     |
| 2195.003415             | 1841.427653                                          | 1923.182418 | 1505.631804 |             |                     |
| 1986.537829             | -0.399067113                                         | 0.036628923 | 0.15290855  | MGRN1       |                     |
| 16                      | 4616493                                              | 4690974     | +           | 10219       | protein_coding      |
| mahogunin ring finger 1 | [Source:HGNC Symbol;Acc:HGNC:20254]                  |             |             |             |                     |
| 908                     | 1883                                                 | 1760        | 2185        | 2015        | 1960 4.859282658    |
| 8.124111566             | 7.978233165                                          | 10.33818403 | 8.592612938 |             |                     |
| 8.953517938             |                                                      |             |             |             |                     |
| ENSG00000260293         | 57.84808379                                          | 12.05036483 | 50.84551764 |             |                     |
| 2.009156444             | 17.36333767                                          | 14.71823279 | 40.24798875 |             |                     |
| 11.36357564             | 1.817830871                                          | 0.036629235 | 0.15290855  |             |                     |
| AC106820.4              | 16                                                   | 2476558     | 2482173     | +           | 5616 sense_intronic |
|                         | "novel transcript, intronic to TBC1D24"              |             |             |             |                     |
| 52                      | 2                                                    | 19          | 15          | 0.486897582 | 0.102058742         |
| 0.428922373             | 0.017218849                                          | 0.14742974  | 0.124683848 |             |                     |
| ENSG00000285095         | 8.09873173                                           | 19.46597396 | 4.888992081 |             |                     |
| 21.09614266             | 72.19493032                                          | 18.64309487 | 10.81789926 |             |                     |
| 37.31138928             | -1.781321725                                         | 0.036684547 | 0.153089669 |             |                     |
| AC025887.2              | 18                                                   | 32470288    | 32745567    | +           | 5012                |
|                         | antisense novel transcript                           |             |             |             |                     |
| 5                       | 21                                                   | 79          | 19          | 0.076380358 | 0.184732025         |

|                              |                                                        |             |                |                   |                |
|------------------------------|--------------------------------------------------------|-------------|----------------|-------------------|----------------|
|                              | 0.046212706                                            | 0.202586009 | 0.686870124    | 0.176965487       |                |
| ENSG00000280401              | 12.72657843                                            | 24.10072966 | 0.977798416    | 0                 |                |
| 0                            | 2.943646558                                            | 12.60170217 | 0.981215519    |                   |                |
| 3.692142147                  | 0.036687464                                            | 1           | AC022532.1     | 10                |                |
| 70434829                     | 70436556                                               | +           | 1728           | TEC               | TEC -          |
| 11                           | 26                                                     | 1           | 0              | 0                 | 3              |
|                              | 0.663381824                                            | 0.026807648 | 0              | 0                 | 0.348131771    |
|                              |                                                        |             |                |                   | 0.081044501    |
| ENSG00000187535              | 357.5011578                                            | 272.5236354 | 272.8057581    |                   |                |
| 395.8038195                  | 406.6676454                                            | 440.5657682 | 300.9435171    |                   |                |
| 414.3457444                  | -0.463039158                                           | 0.036692651 | 0.153089669    |                   | IFT140         |
| 16                           | 1510427                                                | 1612110     | -              | 8168              | protein_coding |
| intraflagellar transport 140 | [Source:HGNC Symbol;Acc:HGNC:29077]                    |             |                |                   |                |
| -                            | 309                                                    | 294         | 279            | 394               | 445 449        |
| 2.068890298                  | 1.586958462                                            | 1.582307658 | 2.332285484    |                   |                |
| 2.374121165                  | 2.566118146                                            |             |                |                   |                |
| ENSG00000119431              | 61.31896881                                            | 79.71779811 | 56.71230814    |                   |                |
| 81.37083598                  | 118.8017841                                            | 156.9944831 | 65.91635835    |                   |                |
| 119.0557011                  | -0.851812665                                           | 0.036716179 | 0.153146039    |                   | HDHD3          |
| 9                            | 113373419                                              | 113376999   | -              | 2105              |                |
| protein_coding               | haloacid dehalogenase like hydrolase domain containing |             |                |                   |                |
| 3                            | [Source:HGNC Symbol;Acc:HGNC:28171]                    |             |                |                   |                |
| -                            |                                                        |             | 53             | 86                | 58             |
| 81                           | 130                                                    | 160         | 1.376950989    | 1.801276193       |                |
| 1.276375176                  | 1.86051911                                             | 2.691224017 | 3.548247605    |                   |                |
| ENSG00000223901              | 39.33669697                                            | 36.15109449 | 50.84551764    |                   |                |
| 11.05036044                  | 25.58807657                                            | 9.812155195 | 42.11110304    |                   |                |
| 15.48353073                  | 1.439266014                                            | 0.036726357 | 0.153146704    |                   |                |
| AP001469.1                   | 21                                                     | 46220269    | 46225364       | +                 | 1117           |
| antisense                    | novel transcript                                       |             |                |                   |                |
| 52                           | 11                                                     | 28          | 10             | 1.6646405         | 1.539378412    |
| 2.15651571                   | 0.476146645                                            | 1.092354132 | 0.417919718    |                   |                |
| ENSG00000159625              | 0                                                      | 0           | 0.977798416    | 15.06867333       |                |
| 11.88017841                  | 0                                                      | 0.325932805 | 8.982950579    | -4.625345544      |                |
| 0.036734499                  | 1                                                      | DRC7        | 16             | 57694793          |                |
| 57731805                     | +                                                      | 5151        | protein_coding | dynein regulatory |                |
| complex subunit 7            | [Source:HGNC Symbol;Acc:HGNC:25289]                    |             |                |                   |                |
| 0                            | 1                                                      | 15          | 13             | 0                 | 0              |
| 0.008993131                  | 0.140799439                                            | 0.10997916  | 0              |                   |                |
| ENSG00000122729              | 1907.829803                                            | 2030.022998 | 1848.039007    |                   |                |
| 1557.096244                  | 1619.359703                                            | 1592.512788 | 1928.630603    |                   |                |
| 1589.656245                  | 0.278910892                                            | 0.036753846 | 0.153219539    |                   | AC01           |
| 9                            | 32384603                                               | 32454769    | +              | 7555              |                |
| protein_coding               | aconitase 1 [Source:HGNC Symbol;Acc:HGNC:117]          |             |                |                   |                |
| 1649                         | 2190                                                   | 1890        | 1550           | 1772              | 1623           |
| 12.78037521                  | 11.58856848                                            | 9.919697897 | 10.22086958    |                   |                |
| 10.02836395                  |                                                        |             |                |                   |                |
| ENSG00000169375              | 2131.123407                                            | 1615.675838 | 1909.640307    |                   |                |
| 1603.306842                  | 1510.610377                                            | 1414.912779 | 1885.479851    |                   |                |
| 1509.61                      | 0.32032043                                             | 0.036769093 | 0.153241308    | SIN3A             | 15             |
| 75369379                     | 75455842                                               | -           | 12453          | protein_coding    |                |
| SIN3                         | transcription regulator family member A [Source:HGNC   |             |                |                   |                |

|                         |                                                      |             |           |             |      |                     |
|-------------------------|------------------------------------------------------|-------------|-----------|-------------|------|---------------------|
| Symbol;Acc:HGNC:19353]  | -                                                    | 1842        | 1743      | 1953        | 1596 | 1653                |
| 1442                    | 8.089288983                                          | 6.171025727 |           | 7.264917904 |      |                     |
| 6.196694923             | 5.784388622                                          | 5.405517879 |           |             |      |                     |
| ENSG00000281183         | 55.53416043                                          | 33.37024107 |           | 43.02313031 |      |                     |
| 16.07325155             | 0.913859877                                          | 22.56795695 |           | 43.97584394 |      |                     |
| 13.18502279             | 1.741189024                                          | 0.036796355 |           | 0.153249442 |      | NPTN-               |
| IT1                     | 15                                                   | 73567012    | 73569294  | -           | 2283 |                     |
| sense_intronic          | NPTN intronic transcript 1 [Source:HGNC              |             |           |             |      |                     |
| Symbol;Acc:HGNC:45091]  | -                                                    | 48          | 36        | 44          | 16   | 1                   |
| 23                      | 1.149820477                                          | 0.695233271 |           | 0.892789802 |      |                     |
| 0.338856084             | 0.01908766                                           | 0.4702924   |           |             |      |                     |
| ENSG00000253910         | 2.313923351                                          | 12.05036483 |           | 18.57816991 |      |                     |
| 81.37083598             | 13.70789816                                          | 25.51160351 |           | 10.98081936 |      |                     |
| 40.19677922             | -1.860244721                                         | 0.036802631 |           | 0.153249442 |      |                     |
| PCDHGB2                 | 5                                                    | 141360042   | 141512979 | +           | 4769 |                     |
| protein_coding          | "protocadherin gamma subfamily B, 2 [Source:HGNC     |             |           |             |      |                     |
| Symbol;Acc:HGNC:8709]"  | -                                                    | 2           | 13        | 19          | 81   | 15                  |
| 26                      | 0.022934928                                          | 0.120184923 |           | 0.18455624  |      |                     |
| 0.821218857             | 0.137063726                                          | 0.254502505 |           |             |      |                     |
| ENSG00000162813         | 1520.247642                                          | 1336.663545 |           | 1199.758657 |      |                     |
| 939.2806376             | 1137.755547                                          | 1124.472985 |           | 1352.223281 |      |                     |
| 1067.169723             | 0.340950991                                          | 0.036813509 |           | 0.153249442 |      | BPNT1               |
| 1                       | 220057482                                            | 220090462   |           | -           | 3113 |                     |
| protein_coding          | "3'(2'), 5'-bisphosphate nucleotidase 1 [Source:HGNC |             |           |             |      |                     |
| Symbol;Acc:HGNC:1096]"  | -                                                    | 1314        | 1442      | 1227        | 935  | 1245                |
| 1146                    | 23.08399424                                          | 20.42302635 |           | 18.2586178  |      |                     |
| 14.52224324             | 17.42805125                                          | 17.18507899 |           |             |      |                     |
| ENSG00000174521         | 15.04050178                                          | 13.90426711 |           | 29.33395248 |      |                     |
| 72.32963199             | 22.84649694                                          | 58.87293117 |           | 19.42624046 |      |                     |
| 51.3496867              | -1.399089377                                         | 0.036816128 |           | 0.153249442 |      | TTC9B               |
| 19                      | 40216058                                             | 40218399    |           | -           | 2342 |                     |
| protein_coding          | tetratricopeptide repeat domain 9B [Source:HGNC      |             |           |             |      |                     |
| Symbol;Acc:HGNC:26395]  | -                                                    | 13          | 15        | 30          | 72   | 25                  |
| 60                      | 0.303564634                                          | 0.282382856 |           | 0.59338535  |      |                     |
| 1.486438078             | 0.465170019                                          | 1.195942764 |           |             |      |                     |
| ENSG00000114541         | 38.1797353                                           | 37.07804563 |           | 74.31267963 |      |                     |
| 34.15565955             | 4.569299387                                          | 11.77458623 |           | 49.85682019 |      |                     |
| 16.83318172             | 1.572107812                                          | 0.036821168 |           | 0.153249442 |      | FRMD4B              |
| 3                       | 69169990                                             | 69542583    |           | -           | 9993 |                     |
| protein_coding          | FERM domain containing 4B [Source:HGNC               |             |           |             |      |                     |
| Symbol;Acc:HGNC:24886]  | -                                                    | 33          | 40        | 76          | 34   | 5                   |
| 12                      | 0.180597929                                          | 0.176481043 |           | 0.352306098 |      |                     |
| 0.164506948             | 0.021803826                                          | 0.056057199 |           |             |      |                     |
| ENSG00000141985         | 3082.145904                                          | 4320.519267 |           | 4708.099374 |      |                     |
| 5376.502644             | 4578.437986                                          | 5380.985909 |           | 4036.921515 |      |                     |
| 5111.975513             | -0.340300182                                         | 0.036883304 |           | 0.153466269 |      | SH3GL1              |
| 19                      | 4360370                                              | 4400547     | -         | 3685        |      | protein_coding "SH3 |
| domain containing       | GRB2 like 1, endophilin A2 [Source:HGNC              |             |           |             |      |                     |
| Symbol;Acc:HGNC:10830]" | -                                                    | 2664        | 4661      | 4815        | 5352 | 5010                |
| 5484                    | 39.53588284                                          | 55.76677998 |           | 60.52868726 |      |                     |

|                                 |                                               |             |                |        |  |
|---------------------------------|-----------------------------------------------|-------------|----------------|--------|--|
| 70.22307276                     | 59.24597233                                   | 69.47139021 |                |        |  |
| ENSG00000149256                 | 214.03791                                     | 202.0753487 | 220.9824421    |        |  |
| 123.5631213                     | 143.4760008                                   | 157.9756986 | 212.3652336    |        |  |
| 141.6716069                     | 0.583610869                                   | 0.036894867 | 0.153469469    | TENM4  |  |
| 11                              | 78652831                                      | 79440948    | - 16330        |        |  |
| protein_coding                  | teneurin transmembrane protein 4 [Source:HGNC |             |                |        |  |
| Symbol;Acc:HGNC:29945]          | -                                             | 185 218     | 226 123        | 157    |  |
| 161                             | 0.619555557                                   | 0.588578328 | 0.641098425    |        |  |
| 0.364183398                     | 0.418959522                                   | 0.460241448 |                |        |  |
| ENSG00000167315                 | 1541.072952                                   | 1356.129519 | 1294.605103    |        |  |
| 973.4362971                     | 1291.284007                                   | 1027.332649 | 1397.269191    |        |  |
| 1097.350984                     | 0.347924695                                   | 0.036904152 | 0.153469469    | ACAA2  |  |
| 18                              | 49782167                                      | 49813960    | - 5072         |        |  |
| protein_coding                  | acetyl-CoA acyltransferase 2 [Source:HGNC     |             |                |        |  |
| Symbol;Acc:HGNC:83]             | -                                             | 1332 1463   | 1324 969       | 1413   |  |
| 1047                            | 14.36215775                                   | 12.71742073 | 12.09236356    |        |  |
| 9.237314894                     | 12.14007905                                   | 9.636370127 |                |        |  |
| ENSG00000133250                 | 365.5998895                                   | 501.4805672 | 491.8326033    |        |  |
| 653.9804225                     | 512.6753912                                   | 679.982355  | 452.97102      |        |  |
| 615.5460563                     | -0.44083728                                   | 0.036969701 | 0.153633235    | ZNF414 |  |
| 19                              | 8509678 8514164                               | - 2758      | protein_coding | zinc   |  |
| finger protein 414 [Source:HGNC | Symbol;Acc:HGNC:20630]                        | -           |                | 316    |  |
| 541                             | 503 651                                       | 561 693     | 6.265958779    |        |  |
| 8.64842376                      | 8.448433287                                   | 11.41268796 | 8.86394795     |        |  |
| 11.72964879                     |                                               |             |                |        |  |
| ENSG00000115840                 | 570.3821061                                   | 556.1706845 | 440.9870857    |        |  |
| 359.6390035                     | 372.85483                                     | 429.7723975 | 522.5132921    |        |  |
| 387.422077                      | 0.431203661                                   | 0.036972789 | 0.153633235    |        |  |
| SLC25A12                        | 2 171784370                                   | 171999859   | -              | 5169   |  |
| protein_coding                  | solute carrier family 25 member 12            |             |                |        |  |
| [Source:HGNC                    | Symbol;Acc:HGNC:10982]                        | -           | 493 600        | 451    |  |
| 358                             | 408 438                                       | 5.21597018  | 5.117745395    |        |  |
| 4.041778092                     | 3.348711326                                   | 3.439633964 | 3.955611348    |        |  |
| ENSG00000105281                 | 4170.846841                                   | 5079.692252 | 5615.496304    |        |  |
| 6567.932416                     | 5192.551823                                   | 6795.898688 | 4955.345132    |        |  |
| 6185.460976                     | -0.319669792                                  | 0.036973682 | 0.153633235    | SLC1A5 |  |
| 19                              | 46774883                                      | 46788594    | - 3332         |        |  |
| protein_coding                  | solute carrier family 1 member 5 [Source:HGNC |             |                |        |  |
| Symbol;Acc:HGNC:10943]          | -                                             | 3605 5480   | 5743 6538      | 5682   |  |
| 6926                            | 59.16910349                                   | 72.51193987 | 79.8428957     |        |  |
| 94.87267369                     | 74.31129581                                   | 97.03390969 |                |        |  |
| ENSG00000270038                 | 30.08100357                                   | 41.71280134 | 38.13413823    |        |  |
| 90.41203998                     | 48.4345735                                    | 87.32818123 | 36.64264771    |        |  |
| 75.39159824                     | -1.037066859                                  | 0.036995896 | 0.153683768    |        |  |
| AL133467.4                      | 14 95644508                                   | 95645232    | +              | 725    |  |
| lincRNA                         | novel transcript                              | -           | 26 45          | 39     |  |
| 90                              | 53 89                                         | 1.961236893 | 2.736581995    |        |  |
| 2.491891084                     | 6.002134447                                   | 3.185638276 | 5.730572824    |        |  |
| ENSG00000173674                 | 2759.353597                                   | 2683.523553 | 2434.718056    |        |  |
| 1947.877173                     | 2451.886051                                   | 1984.01778  | 2625.865069    |        |  |

|                                     |                                                      |             |                  |        |
|-------------------------------------|------------------------------------------------------|-------------|------------------|--------|
| 2127.927001                         | 0.303066742                                          | 0.037072833 | 0.153958465      | EIF1AX |
| X                                   | 20124518                                             | 20141844    | - 4427           |        |
| protein_coding                      | eukaryotic translation initiation factor 1A X-linked |             |                  |        |
| [Source:HGNC Symbol;Acc:HGNC:3250]  | -                                                    | 2385        | 2895 2490        |        |
| 1939                                | 2683 2022                                            | 29.46276991 | 28.83188281      |        |
| 26.0550722                          | 21.17724708                                          | 26.41008193 | 21.3214956       |        |
| ENSG00000107140                     | 303.123959                                           | 377.2691143 | 311.9176948      |        |
| 456.0785128                         | 375.5964096                                          | 547.5182599 | 330.770256       |        |
| 459.7310608                         | -0.473763279                                         | 0.037092005 | 0.153958465      | TESK1  |
| 9                                   | 35605305                                             | 35610041    | + 3298           |        |
| protein_coding                      | testis associated actin remodelling kinase 1         |             |                  |        |
| [Source:HGNC Symbol;Acc:HGNC:11731] | -                                                    | 262         | 407 319          |        |
| 454                                 | 411 558                                              | 4.344555532 | 5.440987346      |        |
| 4.480665132                         | 6.655894324                                          | 5.430624422 | 7.898226491      |        |
| ENSG00000164930                     | 2592.751115                                          | 1864.098744 | 2084.666223      |        |
| 1799.199596                         | 1539.853893                                          | 1839.779099 | 2180.505361      |        |
| 1726.277529                         | 0.336635315                                          | 0.037092237 | 0.153958465      | FZD6   |
| 8                                   | 103298433                                            | 103332866   | + 4065           |        |
| protein_coding                      | frizzled class receptor 6 [Source:HGNC               |             |                  |        |
| Symbol;Acc:HGNC:4044]               | -                                                    | 2241 2011   | 2132 1791 1685   |        |
| 1875                                | 30.14921573                                          | 21.81149724 | 24.29568265      |        |
| 21.30277853                         | 18.06333569                                          | 21.53211834 |                  |        |
| ENSG00000116954                     | 1013.498428                                          | 855.575903  | 733.3488121      |        |
| 951.3355763                         | 1342.46016                                           | 1120.548123 | 867.474381       |        |
| 1138.11462                          | -0.392680263                                         | 0.037114305 | 0.154008215      | RRAGC  |
| 1                                   | 38838198                                             | 38859823    | - 5167           |        |
| protein_coding                      | Ras related GTP binding C [Source:HGNC               |             |                  |        |
| Symbol;Acc:HGNC:19902]              | -                                                    | 876 923     | 750 947 1469     |        |
| 1142                                | 9.271721059                                          | 7.875845671 | 6.723962112      |        |
| 8.861612064                         | 12.38916201                                          | 10.31748101 |                  |        |
| ENSG00000148180                     | 3185.115493                                          | 2060.612386 | 2286.092697      |        |
| 1759.016467                         | 1976.678915                                          | 2116.481875 | 2510.606859      |        |
| 1950.725752                         | 0.363488065                                          | 0.037124372 | 0.154008215      | GSN    |
| 9                                   | 121207794                                            | 121332843   | + 11018          |        |
| protein_coding                      | gelsolin [Source:HGNC Symbol;Acc:HGNC:4620]          |             |                  | -      |
| 2753                                | 2223 2338                                            | 1751 2163   | 2157 13.66463879 |        |
| 8.895505912                         | 9.829788976                                          | 7.683951138 | 8.554849017      |        |
| 9.13888922                          |                                                      |             |                  |        |
| ENSG00000175416                     | 599.306148                                           | 1059.505154 | 992.4653924      |        |
| 1155.264955                         | 1231.883115                                          | 1180.40227  | 883.7588981      |        |
| 1189.183447                         | -0.427080402                                         | 0.037138509 | 0.15402375       | CLTB   |
| 5                                   | 176392455                                            | 176416569   | - 2039           |        |
| protein_coding                      | clathrin light chain B [Source:HGNC                  |             |                  |        |
| Symbol;Acc:HGNC:2091]               | -                                                    | 518 1143    | 1015 1150 1348   |        |
| 1203                                | 13.89335864                                          | 24.71513361 | 23.05957359      |        |
| 27.26979236                         | 28.80920435                                          | 27.54193426 |                  |        |
| ENSG00000073536                     | 1235.63507                                           | 1464.582803 | 1515.587545      |        |
| 1887.602479                         | 1716.22885                                           | 1633.72384  | 1405.268472      |        |
| 1745.851723                         | -0.312535976                                         | 0.037148268 | 0.15402375       | NLE1   |
| 17                                  | 35128753                                             | 35142315    | - 5463           |        |

|                                                               |             |              |             |                |                      |             |
|---------------------------------------------------------------|-------------|--------------|-------------|----------------|----------------------|-------------|
| protein_coding notchless homolog 1 [Source:HGNC               |             |              |             |                |                      |             |
| Symbol;Acc:HGNC:19889]                                        | -           | 1068         | 1580        | 1550           | 1879                 | 1878        |
|                                                               | 1665        | 10.6914046   | 12.75145799 | 13.14325559    |                      |             |
| 16.63017411                                                   |             | 14.98038535  | 14.22751569 |                |                      |             |
| ENSG00000214389                                               |             | 156.1898262  | 129.7731597 | 118.3136084    |                      |             |
| 179.8195017                                                   |             | 222.0679502  | 212.9237677 | 134.7588648    |                      |             |
| 204.9370732                                                   |             | -0.606854879 | 0.037159783 | 0.15402972     |                      |             |
| RPS3AP26                                                      | 7           | 98385801     | 98386584    | -              |                      | 784         |
| processed_pseudogene ribosomal protein S3a pseudogene 26      |             |              |             |                |                      |             |
| [Source:HGNC Symbol;Acc:HGNC:36513]                           | -           |              |             | 135            | 140                  | 121         |
|                                                               | 179         | 243          | 217         | 9.416996707    | 7.873102961          |             |
| 7.149435681                                                   |             | 11.03921482  | 13.50668616 | 12.92080901    |                      |             |
| ENSG00000162889                                               |             | 3327.421779  | 3369.467397 | 3324.514615    |                      |             |
| 3839.497965                                                   |             | 4278.691946  | 3839.496328 | 3340.46793     |                      |             |
| 3985.895413                                                   |             | -0.254903719 | 0.037183959 | 0.15408815     |                      |             |
| MAPKAPK2                                                      | 1           | 206684944    | 206734283   | +              |                      | 4195        |
| protein_coding mitogen-activated protein kinase-activated     |             |              |             |                |                      |             |
| protein kinase 2 [Source:HGNC Symbol;Acc:HGNC:6887]           | -           |              |             |                |                      | 2876        |
|                                                               | 3635        | 3400         | 3822        | 4682           | 3913                 | 37.49312409 |
| 38.20378638                                                   |             | 37.5447665   | 44.05142219 | 48.63602152    |                      |             |
| 43.54355857                                                   |             |              |             |                |                      |             |
| ENSG00000241360                                               |             | 122.6379376  | 251.2037592 | 213.1600547    |                      |             |
| 302.3780448                                                   |             | 238.517428   | 377.767975  | 195.6672505    |                      |             |
| 306.2211493                                                   |             | -0.64298371  | 0.037221847 | 0.154203353    |                      | PDXP        |
|                                                               | 22          | 37658727     | 37666934    | +              | 2203                 |             |
| protein_coding pyridoxal phosphatase [Source:HGNC             |             |              |             |                |                      |             |
| Symbol;Acc:HGNC:30259]                                        | -           | 106          | 271         | 218            | 301                  | 261         |
|                                                               | 385         | 2.631395216  | 5.423613733 | 4.583998346    |                      |             |
| 6.606222776                                                   |             | 5.162791756  | 8.158160932 |                |                      |             |
| ENSG00000156486                                               | 0           | 0            | 4.888992081 | 28.12819022    |                      |             |
| 15.53561792                                                   |             | 2.943646558  | 1.629664027 |                |                      |             |
| 15.53581823                                                   |             | -3.235128659 | 0.037249755 | 1              | KCNS2                | 8           |
|                                                               | 98427022    | 98432848     | +           | 5348           | protein_coding       |             |
| potassium voltage-gated channel modifier subfamily S member 2 |             |              |             |                |                      |             |
| [Source:HGNC Symbol;Acc:HGNC:6301]                            | -           |              |             | 0              | 0                    | 5           |
|                                                               | 28          | 17           | 3           | 0              | 0                    | 0.04330929  |
| 0.253144123                                                   |             | 0.13852116   | 0.026186406 |                |                      |             |
| ENSG00000226144                                               |             | 16.19746346  | 4.634755704 | 12.71137941    |                      | 0           |
|                                                               | 2.741579632 | 0            | 11.18119952 | 0.913859877    |                      |             |
| 3.578790058                                                   |             | 0.03726506   | 1           | RPS27AP3       | 20                   |             |
| 37049254                                                      |             | 37049707     | +           | 454            | processed_pseudogene |             |
| ribosomal protein S27a pseudogene 3 [Source:HGNC              |             |              |             |                |                      |             |
| Symbol;Acc:HGNC:16538]                                        | -           | 14           | 5           | 13             | 0                    | 3           |
|                                                               | 0           | 1.686424471  | 0.485565821 | 1.326447163    |                      | 0           |
|                                                               | 0.287954586 | 0            |             |                |                      |             |
| ENSG00000278829                                               | 0           | 0            | 3.911193665 | 36.16481599    |                      | 0           |
|                                                               | 13.73701727 | 1.303731222  | 16.63394442 | -3.654863725   |                      |             |
|                                                               | 0.037272662 | 1            | AC099811.5  | 17             | 42272069             |             |
|                                                               | 42275571    | -            | 819         | sense_intronic | "novel               |             |
| transcript, sense intronic to STAT5B"                         | -           |              |             | 0              | 0                    | 4           |

|                                |                                                     |             |                          |           |              |             |
|--------------------------------|-----------------------------------------------------|-------------|--------------------------|-----------|--------------|-------------|
| 36                             | 0                                                   | 14          | 0                        | 0         | 0.226244768  |             |
| 2.125297912                    | 0                                                   | 0.797976625 |                          |           |              |             |
| ENSG00000277103                | 0                                                   | 0           | 4.888992081              |           | 26.11903377  |             |
| 17.36333767                    | 2.943646558                                         |             | 1.629664027              |           |              |             |
| 15.47533933                    | -3.229692284                                        |             | 0.037281144              | 1         | AL445670.1   |             |
| 9                              | 97151894                                            |             | 97152694                 | -         | 801          |             |
| processed_pseudogene           | sorting nexin 18 (SNX18)                            | pseudogene  |                          |           |              | -           |
| 0                              | 0                                                   | 5           | 26                       | 19        | 3            | 0           |
| 0.289161151                    | 1.569430356                                         |             | 1.033664694              |           | 0.174837575  |             |
| ENSG00000189149                | 32.39492692                                         |             | 29.66243651              |           | 18.57816991  |             |
| 62.28384977                    | 44.77913399                                         |             | 71.62873292              |           | 26.87851111  |             |
| 59.56390556                    | -1.149694243                                        |             | 0.037285794              |           | 0.154426425  | CRYM-       |
| AS1                            | 16                                                  | 21300849    | 21339037                 | +         | 2746         |             |
| transcribed_unitary_pseudogene | CRYM antisense RNA 1 [Source:HGNC                   |             |                          |           |              |             |
| Symbol;Acc:HGNC:34405]         | -                                                   | 28          | 32                       | 19        | 62           | 49          |
| 73                             | 0.557637808                                         |             | 0.513787345              |           | 0.320520288  |             |
| 1.091672507                    | 0.777596227                                         |             | 1.240990232              |           |              |             |
| ENSG00000233387                | 0                                                   | 0           | 0                        | 18.082408 |              | 0.913859877 |
| 0.981215519                    | 0                                                   |             | 6.659161131              |           | -5.153121089 |             |
| 0.037417531                    | 1                                                   | AL121748.1  | 10                       |           | 33096257     |             |
| 33116672                       | -                                                   | 552         | lincRNA novel transcript |           |              | -           |
| 0                              | 0                                                   | 0           | 18                       | 1         | 1            | 0           |
| 0                              | 1.576647636                                         |             | 0.078944071              |           | 0.084568175  |             |
| ENSG00000070476                | 1018.126275                                         |             | 1116.049174              |           | 1182.158285  |             |
| 1521.936006                    | 1400.947192                                         |             | 1231.425477              |           | 1105.444578  |             |
| 1384.769558                    | -0.324629912                                        |             | 0.037431926              |           | 0.154989666  | ZXDC        |
| 3                              | 126437601                                           |             | 126475919                | -         | 7357         |             |
| protein_coding                 | ZXD family zinc finger C [Source:HGNC               |             |                          |           |              |             |
| Symbol;Acc:HGNC:28160]         | zf-C2H2                                             | 880         | 1204                     | 1209      | 1515         | 1533        |
| 1255                           | 6.541489202                                         |             | 7.215387984              |           | 7.612512182  |             |
| 9.956646616                    | 9.080295804                                         |             | 7.963225344              |           |              |             |
| ENSG00000116266                | 2031.624703                                         |             | 1798.285213              |           | 1513.631948  |             |
| 1138.187126                    | 1743.644646                                         |             | 1179.421054              |           | 1781.180621  |             |
| 1353.750942                    | 0.395300023                                         |             | 0.037520008              |           | 0.155312309  | STXBP3      |
| 1                              | 108746674                                           |             | 108809526                | +         | 5895         |             |
| protein_coding                 | syntaxin binding protein 3 [Source:HGNC             |             |                          |           |              |             |
| Symbol;Acc:HGNC:11446]         | -                                                   | 1756        | 1940                     | 1548      | 1133         | 1908        |
| 1202                           | 16.29053754                                         |             | 14.50948101              |           | 12.16436947  |             |
| 9.292815547                    | 14.10435267                                         |             | 9.518460107              |           |              |             |
| ENSG00000240625                | 0                                                   | 0           | 2.933395248              |           | 11.05036044  |             |
| 6.397019142                    | 16.68066383                                         |             | 0.977798416              |           |              |             |
| 11.37601447                    | -3.51699027                                         |             | 0.037608042              | 1         | RN7SL403P    |             |
| 6                              | 43036196                                            |             | 43036500                 | -         | 305          |             |
| misc_RNA                       | "RNA, 7SL, cytoplasmic 403, pseudogene [Source:HGNC |             |                          |           |              |             |
| Symbol;Acc:HGNC:46419]"        | -                                                   | 0           | 0                        | 3         | 11           | 7           |
| 17                             | 0                                                   | 0           | 0.455642128              |           | 1.743789516  |             |
| 1.000130792                    | 2.60192706                                          |             |                          |           |              |             |
| ENSG00000105607                | 403.7796248                                         |             | 456.0599613              |           | 420.4533189  |             |
| 256.1674466                    | 348.1806133                                         |             | 327.7259835              |           | 426.7643017  |             |
| 310.6913478                    | 0.457848111                                         |             | 0.037640301              |           | 0.155768078  | GCDH        |



|                        |                                                    |             |             |             |        |
|------------------------|----------------------------------------------------|-------------|-------------|-------------|--------|
| 19                     | 12891026                                           | 12914207    | +           | 4136        |        |
| protein_coding         | glutaryl-CoA dehydrogenase [Source:HGNC            |             |             |             |        |
| Symbol;Acc:HGNC:4189]  | -                                                  | 349 492     | 430         | 255         | 381    |
| 334                    | 4.614658949                                        | 5.24467439  | 4.816043282 |             |        |
| 2.980992386            | 4.014237312                                        | 3.769744989 |             |             |        |
| ENSG00000165175        | 1436.946401                                        | 1771.40363  | 1562.521869 |             |        |
| 1973.996206            | 1991.300673                                        | 1895.708384 | 1590.290633 |             |        |
| 1953.668421            | -0.296440607                                       | 0.037659594 | 0.155802705 |             |        |
| MID1IP1 X              | 38801432                                           | 38806537    | +           | 3790        |        |
| protein_coding         | MID1 interacting protein 1 [Source:HGNC            |             |             |             |        |
| Symbol;Acc:HGNC:20715] | -                                                  | 1242 1911   | 1598        | 1965        | 2179   |
| 1932                   | 17.92161315                                        | 22.23081758 | 19.53169891 |             |        |
| 25.0682814             | 25.05397375                                        | 23.79654726 |             |             |        |
| ENSG00000162337        | 490.5517505                                        | 414.34716   | 659.0361325 |             |        |
| 402.835867             | 394.787467                                         | 325.7635525 | 521.311681  |             |        |
| 374.4622955            | 0.477262099                                        | 0.037669052 | 0.155802705 |             | LRP5   |
| 11                     | 68312609                                           | 68449275    | +           | 6164        |        |
| protein_coding         | LDL receptor related protein 5 [Source:HGNC        |             |             |             |        |
| Symbol;Acc:HGNC:6697]  | -                                                  | 424 447     | 674         | 401         | 432    |
| 332                    | 3.761819378                                        | 3.197266601 | 5.065236437 |             |        |
| 3.145451253            | 3.054075116                                        | 2.514325439 |             |             |        |
| ENSG00000179922        | 190.8986765                                        | 190.951935  | 278.6725486 |             |        |
| 292.3322626            | 287.8658614                                        | 390.5237767 | 220.1743867 |             |        |
| 323.5739669            | -0.55459286                                        | 0.037688541 | 0.155841149 |             | ZNF784 |
| 19                     | 55620742                                           | 55624601    | -           | 2058        |        |
| protein_coding         | zinc finger protein 784 [Source:HGNC               |             |             |             |        |
| Symbol;Acc:HGNC:33111] | zf-C2H2                                            | 165 206     | 285         | 291         | 315    |
| 398                    | 4.384633387                                        | 4.41322234  | 6.415078061 |             |        |
| 6.836736395            | 6.669968473                                        | 9.027837588 |             |             |        |
| ENSG00000187049        | 313.5366141                                        | 275.3044888 | 320.7178805 |             |        |
| 285.3002151            | 143.4760008                                        | 164.8442073 | 303.1863278 |             |        |
| 197.8734744            | 0.616446446                                        | 0.037706758 | 0.155849596 |             |        |
| TMEM216 11             | 61391687                                           | 61398863    | +           | 2364        |        |
| protein_coding         | transmembrane protein 216 [Source:HGNC             |             |             |             |        |
| Symbol;Acc:HGNC:25018] | -                                                  | 271 297     | 328         | 284         | 157    |
| 168                    | 6.26926361                                         | 5.539147565 | 6.427303786 |             |        |
| 5.80860821             | 2.894081639                                        | 3.317476425 |             |             |        |
| ENSG00000269335        | 373.6986213                                        | 479.2337398 | 431.2091015 |             |        |
| 459.0922475            | 615.9415574                                        | 678.019924  | 428.0471542 |             |        |
| 584.3512429            | -0.448329386                                       | 0.037710974 | 0.155849596 |             | IKBKG  |
| X                      | 154541199                                          | 154565046   | +           | 3529        |        |
| protein_coding         | inhibitor of nuclear factor kappa B kinase subunit |             |             |             |        |
| gamma [Source:HGNC     | Symbol;Acc:HGNC:5961]                              | -           | 323         | 517         |        |
| 441                    | 457 674                                            | 691         | 5.005478228 | 6.459112409 |        |
| 5.78881122             | 6.261317955                                        | 8.322749741 | 9.140552025 |             |        |
| ENSG00000169018        | 2131.123407                                        | 1598.990718 | 1706.258236 |             |        |
| 2643.045302            | 2508.545364                                        | 1836.835452 | 1812.12412  |             |        |
| 2329.475373            | -0.362793873                                       | 0.037735179 | 0.155907481 |             | FEM1B  |
| 15                     | 68277803                                           | 68295865    | +           | 7569        |        |
| protein_coding         | fem-1 homolog B [Source:HGNC                       |             |             |             |        |
| Symbol;Acc:HGNC:3649]  |                                                    |             |             |             |        |

|                           |                                            |                        |              |                        |             |                  |        |
|---------------------------|--------------------------------------------|------------------------|--------------|------------------------|-------------|------------------|--------|
| -                         | 1842                                       | 1725                   | 1745         | 2631                   | 2745        | 1872             |        |
| 13.30901251               | 10.04811396                                |                        | 10.67970808  |                        | 16.80674301 |                  |        |
| 15.80383334               | 11.54551673                                |                        |              |                        |             |                  |        |
| ENSG00000130340           | 1955.265232                                |                        | 1986.456295  |                        | 1569.366458 |                  |        |
| 2012.170179               | 2794.583505                                |                        | 2193.016686  |                        | 1837.029328 |                  |        |
| 2333.25679                | -0.345238744                               |                        | 0.037769806  |                        | 0.156008383 |                  | SNX9   |
| 6                         | 157700387                                  |                        | 157945077    |                        | +           | 4637             |        |
| protein_coding            | sorting nexin 9                            |                        | [Source:HGNC | Symbol;Acc:HGNC:14973] |             |                  |        |
| -                         | 1690                                       | 2143                   | 1605         | 2003                   | 3058        | 2235             |        |
| 19.93169907               | 20.37600475                                |                        | 16.03394526  |                        | 20.88550929 |                  |        |
| 28.73816162               | 22.50020461                                |                        |              |                        |             |                  |        |
| ENSG00000071553           | 2577.710613                                |                        | 2780.853423  |                        | 3571.897614 |                  |        |
| 2301.488707               | 2345.878305                                |                        | 2523.686316  |                        | 2976.82055  |                  |        |
| 2390.351109               | 0.316753121                                |                        | 0.037862176  |                        | 0.156347674 |                  |        |
| ATP6AP1 X                 | 154428632                                  |                        | 154436516    |                        | +           | 4884             |        |
| protein_coding            | ATPase H+ transporting accessory protein 1 |                        |              |                        |             |                  |        |
| [Source:HGNC              | Symbol;Acc:HGNC:868]                       |                        | -            |                        | 2228        | 3000             | 3653   |
| 2291                      | 2567                                       | 2572                   | 24.94791433  |                        | 27.08192665 |                  |        |
| 34.64786454               | 22.68039691                                |                        | 22.9038669   |                        | 24.58336587 |                  |        |
| ENSG00000233538           | 0                                          | 12.97731597            | 12.71137941  |                        | 0           | 0                |        |
| 0.981215519               | 8.562898461                                |                        | 0.32707184   |                        | 4.633529385 |                  |        |
| 0.037925694               | 1                                          |                        | AC017104.3   |                        | 2           | 231452195        |        |
| 231453153                 | +                                          |                        | 568          |                        | lincRNA     | novel transcript |        |
| -                         | 0                                          | 14                     | 13           | 0                      | 0           | 1                | 0      |
| 1.086709986               | 1.060223613                                |                        | 0            |                        | 0           | 0.082185973      |        |
| ENSG00000160213           | 1428.84767                                 |                        | 4071.169411  |                        | 1457.897438 |                  |        |
| 3657.669306               | 7780.602996                                |                        | 4839.354942  |                        | 2319.30484  |                  |        |
| 5425.875748               | -1.226089757                               |                        | 0.037942303  |                        | 0.156636237 |                  | CSTB   |
| 21                        | 43772511                                   |                        | 43776445     |                        | -           | 3935             |        |
| protein_coding            | cystatin B                                 |                        | [Source:HGNC | Symbol;Acc:HGNC:2482]  |             | -                |        |
| 1235                      | 4392                                       | 1491                   | 3641         | 8514                   | 4932        | 17.16393786      |        |
| 49.20979465               |                                            | 17.55235373            |              | 44.73806114            |             | 94.28606411      |        |
| 58.50922789               |                                            |                        |              |                        |             |                  |        |
| ENSG00000230002           | 42.807582                                  |                        | 67.66743328  |                        | 60.6235018  |                  |        |
| 128.5860124               | 137.9928415                                |                        | 60.83536221  |                        | 57.03283903 |                  |        |
| 109.138072                | -0.933707979                               |                        | 0.037955121  |                        | 0.15664685  |                  | ALMS1- |
| IT1                       | 2                                          | 73456764               | 73459482     |                        | +           | 2105             |        |
| sense_intronic            | ALMS1 intronic transcript 1                |                        | [Source:HGNC | Symbol;Acc:HGNC:41305] |             | -                |        |
| 62                        | 0.961267671                                |                        | 37           | 73                     | 62          | 128              | 151    |
| 2.940079581               | 3.125960204                                |                        | 1.528990257  |                        | 1.364401051 |                  |        |
| ENSG00000127804           | 1384.883126                                |                        | 1288.462086  |                        | 1409.007518 |                  |        |
| 1728.87912                | 1772.888162                                |                        | 1517.940409  |                        | 1360.784243 |                  |        |
| 1673.235897               | -0.298404129                               |                        | 0.037976284  |                        | 0.156691891 |                  |        |
| METTL16                   | 17                                         | 2405562                | 2511891      | -                      | 8934        | protein_coding   |        |
| methyltransferase like 16 | [Source:HGNC                               | Symbol;Acc:HGNC:28484] |              | -                      |             |                  |        |
| 1197                      | 1390                                       | 1441                   | 1721         | 1940                   | 1547        | 7.327282148      |        |
| 6.85966347                |                                            | 7.471718279            |              | 9.313997964            |             | 9.462684919      |        |
| 8.083331717               |                                            |                        |              |                        |             |                  |        |
| ENSG00000171462           | 50.90631373                                |                        | 41.71280134  |                        | 91.91305112 |                  |        |

|                                                     |                                                        |             |                                     |             |
|-----------------------------------------------------|--------------------------------------------------------|-------------|-------------------------------------|-------------|
| 120.5493866                                         | 148.95916                                              | 80.4596726  | 61.51072206                         |             |
| 116.6560731                                         | -0.923142471                                           | 0.038038652 | 0.156906872                         | DLK2        |
| 6                                                   | 43450352                                               | 43456632    | -                                   | 2236        |
| protein_coding                                      | delta like non-canonical Notch ligand 2 [Source:HGNC   |             |                                     |             |
| Symbol;Acc:HGNC:21113]                              | -                                                      | 44          | 45                                  | 94          |
| 82                                                  | 1.076156889                                            | 0.887308563 | 1.947414997                         | 120         |
| 2.594840474                                         | 3.176686833                                            | 1.711938224 |                                     | 163         |
| ENSG00000183426                                     | 267.2581471                                            | 208.5640067 | 198.4930785                         |             |
| 94.43035287                                         | 155.3561792                                            | 176.6187935 | 224.7717441                         |             |
| 142.1351085                                         | 0.659437309                                            | 0.03806537  | 0.156974726                         | NPIPA1      |
| 16                                                  | 14922802                                               | 14952060    | +                                   | 7277        |
| protein_coding                                      | nuclear pore complex interacting protein family member |             |                                     |             |
| A1 [Source:HGNC                                     | Symbol;Acc:HGNC:7909]                                  | -           | 231                                 | 225         |
| 94                                                  | 170                                                    | 180         | 1.736018375                         | 203         |
| 1.292248744                                         | 0.624563637                                            | 1.018017267 | 1.154692024                         |             |
| ENSG00000227954                                     | 37.02277362                                            | 23.17377852 | 19.55596832                         | 0           |
| 10.96631853                                         | 6.868508636                                            | 26.58417349 | 5.944942388                         |             |
| 2.151172047                                         | 0.038091007                                            | 0.157038088 | TARID                               | 6           |
| 133502252                                           | 133892802                                              | -           | 7862                                | antisense   |
| TCF21 antisense RNA inducing promoter demethylation |                                                        |             |                                     |             |
| [Source:HGNC                                        | Symbol;Acc:HGNC:50506]                                 | -           | 32                                  | 25          |
| 0                                                   | 12                                                     | 7           | 0.222593076                         | 20          |
| 0.117841812                                         | 0                                                      | 0.066513041 | 0.041563397                         |             |
| ENSG00000233901                                     | 3.470885027                                            | 11.12341369 | 2.933395248                         | 0           |
| 0                                                   | 0                                                      | 5.842564655 | 0                                   | 5.042410329 |
| 0.038100017                                         | 1                                                      | LINC01503   | 9                                   | 129332300   |
| 129359538                                           | +                                                      | 1594        | lincRNA long intergenic non-protein |             |
| coding RNA 1503 [Source:HGNC                        | Symbol;Acc:HGNC:51184]                                 | -           |                                     | 3           |
| 12                                                  | 3                                                      | 0           | 0                                   | 0.102926606 |
| 0.331915006                                         | 0.08718372                                             | 0           | 0                                   |             |
| ENSG00000129292                                     | 2375.24232                                             | 2098.617383 | 2130.622749                         |             |
| 1961.941268                                         | 1777.457462                                            | 1661.197874 | 2201.494151                         |             |
| 1800.198868                                         | 0.290126455                                            | 0.038188885 | 0.15739916                          |             |
| PHF20L1 8                                           | 132775358                                              | 132848807   | +                                   | 20571       |
| protein_coding                                      | PHD finger protein 20 like 1 [Source:HGNC              |             |                                     |             |
| Symbol;Acc:HGNC:24280]                              | -                                                      | 2053        | 2264                                | 2179        |
| 1693                                                | 5.457933727                                            | 4.852381925 | 4.906866946                         | 1953        |
| 4.590373837                                         | 4.120242706                                            | 3.841913564 |                                     | 1945        |
| ENSG00000196504                                     | 4714.618829                                            | 3747.663462 | 3826.125202                         |             |
| 3515.019199                                         | 3568.622821                                            | 2827.863127 | 4096.135831                         |             |
| 3303.835049                                         | 0.309857631                                            | 0.038211016 | 0.157424365                         |             |
| PRPF40A 2                                           | 152651593                                              | 152717997   | -                                   | 9536        |
| protein_coding                                      | pre-mRNA processing factor 40 homolog A [Source:HGNC   |             |                                     |             |
| Symbol;Acc:HGNC:16463]                              | -                                                      | 4075        | 4043                                | 3913        |
| 2882                                                | 23.36985853                                            | 18.69267507 | 19.00842184                         | 3499        |
| 17.74103353                                         | 17.84487021                                            | 14.10827024 |                                     | 3905        |
| ENSG00000153814                                     | 752.0250892                                            | 608.0799484 | 624.8131879                         |             |
| 296.3505755                                         | 522.7278499                                            | 577.935941  | 661.6394085                         |             |
| 465.6714554                                         | 0.505846091                                            | 0.038215596 | 0.157424365                         | JAZF1       |
| 7                                                   | 27830573                                               | 28180743    | -                                   | 4206        |

|                 |                                                        |                             |                        |      |             |       |        |      |
|-----------------|--------------------------------------------------------|-----------------------------|------------------------|------|-------------|-------|--------|------|
| protein_coding  | JAZF zinc finger 1 [Source:HGNC                        | Symbol;Acc:HGNC:28917]      |                        |      |             |       |        |      |
| -               | 650                                                    | 656                         | 639                    | 295  | 572         | 589   |        |      |
| 8.451597404     | 6.876517127                                            |                             | 7.037753406            |      | 3.391204377 |       |        |      |
| 5.926323549     | 6.537204369                                            |                             |                        |      |             |       |        |      |
| ENSG00000138757 | 5173.932614                                            |                             | 4297.345489            |      | 4199.644197 |       |        |      |
| 5762.260682     | 5622.979826                                            |                             | 5154.325124            |      | 4556.9741   |       |        |      |
| 5513.188544     | -0.275037845                                           |                             | 0.038272018            |      | 0.157614314 | G3BP2 |        |      |
| 4               | 75642782                                               |                             | 75724525               |      | -           | 7183  |        |      |
| protein_coding  | G3BP stress granule assembly factor 2 [Source:HGNC     | Symbol;Acc:HGNC:30291]      | -                      | 4472 | 4636        | 4295  | 5736   | 6153 |
| 5253            | 34.04792434                                            |                             | 28.45584711            |      | 27.69872366 |       |        |      |
| 38.61041705     | 37.32842331                                            |                             | 34.13874646            |      |             |       |        |      |
| ENSG00000111335 | 4.627846703                                            |                             | 25.95463194            |      | 8.800185745 |       |        |      |
| 5.02289111      | 115.1463446                                            |                             | 31.39889662            |      | 13.1275548  |       |        |      |
| 50.52271076     | -1.936934737                                           |                             | 0.038321575            |      | 0.157748155 |       | OAS2   |      |
| 12              | 112978395                                              |                             | 113011723              |      | +           | 6264  |        |      |
| protein_coding  | 2'-5'-oligoadenylate synthetase 2 [Source:HGNC         | Symbol;Acc:HGNC:8087]       | -                      | 4    | 28          | 9     | 5      | 126  |
| 32              | 0.034922309                                            |                             | 0.19707895             |      | 0.06655692  |       |        |      |
| 0.038593971     | 0.876551412                                            |                             | 0.238475773            |      |             |       |        |      |
| ENSG00000168653 | 2791.748524                                            |                             | 2991.271332            |      | 3161.222279 |       |        |      |
| 2201.030884     | 2307.49619                                             |                             | 2784.689644            |      | 2981.414045 |       |        |      |
| 2431.07224      | 0.294548362                                            |                             | 0.038325155            |      | 0.157748155 |       | NDUFS5 |      |
| 1               | 39026318                                               |                             | 39034636               |      | +           | 548   |        |      |
| protein_coding  | NADH:ubiquinone oxidoreductase subunit S5 [Source:HGNC | Symbol;Acc:HGNC:7712]       | -                      | 2413 | 3227        | 3233  | 2191   | 2525 |
| 2838            | 240.8083135                                            |                             | 259.6285004            |      | 273.2924298 |       |        |      |
| 193.3138791     | 200.7887711                                            |                             | 241.7563379            |      |             |       |        |      |
| ENSG00000168175 | 3161.97626                                             |                             | 3162.757293            |      | 2785.747688 |       |        |      |
| 4050.459391     | 3402.300324                                            |                             | 3584.380293            |      | 3036.82708  |       |        |      |
| 3679.046669     | -0.27675608                                            |                             | 0.038345216            |      | 0.157788242 |       |        |      |
| MAPK1IP1L       | 14                                                     | 55051631                    | 55070192               |      | +           |       | 6988   |      |
| protein_coding  | mitogen-activated protein kinase 1 interacting         | protein 1 like [Source:HGNC | Symbol;Acc:HGNC:19840] | -    |             |       |        | 2733 |
| 3412            | 2849                                                   | 4032                        | 3723                   | 3653 | 21.38855516 |       |        |      |
| 21.52732583     | 18.88608799                                            |                             | 27.89772851            |      | 23.21660634 |       |        |      |
| 24.40297706     |                                                        |                             |                        |      |             |       |        |      |
| ENSG00000100941 | 2600.849847                                            |                             | 2940.289019            |      | 3117.221351 |       |        |      |
| 2534.550854     | 1985.817514                                            |                             | 2480.512833            |      | 2886.120072 |       |        |      |
| 2333.627067     | 0.306910265                                            |                             | 0.038380889            |      | 0.157892531 |       | PNN    |      |
| 14              | 39175183                                               |                             | 39183218               |      | +           | 4201  |        |      |
| protein_coding  | "pinin, desmosome associated protein [Source:HGNC      | Symbol;Acc:HGNC:9162]"      | -                      | 2248 | 3172        | 3188  | 2523   | 2173 |
| 2528            | 29.26431333                                            |                             | 33.29005059            |      | 35.1534608  |       |        |      |
| 29.03793879     | 22.54060884                                            |                             | 28.09120855            |      |             |       |        |      |
| ENSG00000151090 | 62.47593049                                            |                             | 106.5993812            |      | 131.0249878 |       |        |      |
| 20.09156444     | 57.57317228                                            |                             | 65.7414398             |      | 100.0334332 |       |        |      |
| 47.80205884     | 1.06575136                                             |                             | 0.038393931            |      | 0.157902014 |       | THRβ   |      |
| 3               | 24117153                                               |                             | 24495756               |      | -           | 10968 |        |      |
| protein_coding  | thyroid hormone receptor beta [Source:HGNC             |                             |                        |      |             |       |        |      |

|                                                        |                                                       |                                  |                |               |                        |
|--------------------------------------------------------|-------------------------------------------------------|----------------------------------|----------------|---------------|------------------------|
| Symbol;Acc:HGNC:11799]                                 | THR-like                                              | 54                               | 115            | 134           | 20                     |
| 63                                                     | 67                                                    | 0.269253298                      | 0.462279204    | 0.565952278   |                        |
| 0.088166534                                            | 0.250306257                                           | 0.285163146                      |                |               |                        |
| ENSG00000140829                                        | 2916.700384                                           | 3399.129833                      | 3267.802307    |               |                        |
| 4173.017934                                            | 3259.738183                                           | 4440.000226                      | 3194.544175    |               |                        |
| 3957.585448                                            | -0.308734176                                          | 0.038403852                      | 0.157902014    |               | DHX38                  |
| 16                                                     | 72093562                                              | 72112912                         | +              | 6361          |                        |
| protein_coding                                         | DEAH-box helicase 38 [Source:HGNC                     |                                  |                |               |                        |
| Symbol;Acc:HGNC:17211]                                 | -                                                     | 2521                             | 3667           | 3342          | 4154                   |
| 4525                                                   | 21.6741544                                            | 25.41671811                      | 24.33792261    |               | 3567                   |
| 31.57492394                                            | 24.43634857                                           | 33.20773264                      |                |               |                        |
| ENSG00000105641                                        | 0                                                     | 15.75816939                      | 4.888992081    | 0             | 0                      |
| 0                                                      | 6.882387158                                           | 0                                | 5.280321391    | 0.038439751   |                        |
| 1                                                      | SLC5A5                                                | 19                               | 17871973       | 17895174      | +                      |
| 3652                                                   | protein_coding                                        | solute carrier family 5 member 5 |                |               |                        |
| [Source:HGNC                                           | Symbol;Acc:HGNC:11040]                                | -                                | 0              | 17            | 5                      |
| 0                                                      | 0                                                     | 0                                | 0              | 0.205235324   | 0.063422257            |
| 0                                                      | 0                                                     | 0                                |                |               |                        |
| ENSG00000136144                                        | 1595.450151                                           | 1372.81464                       | 1311.227676    |               |                        |
| 1241.658682                                            | 1176.137662                                           | 965.5160712                      | 1426.497489    |               |                        |
| 1127.770805                                            | 0.338586187                                           | 0.038440486                      | 0.15801014     |               | RCBTB1                 |
| 13                                                     | 49531946                                              | 49585583                         | -              | 4534          |                        |
| protein_coding                                         | RCC1 and BTB domain containing protein 1 [Source:HGNC |                                  |                |               |                        |
| Symbol;Acc:HGNC:18243]                                 | -                                                     | 1379                             | 1481           | 1341          | 1236                   |
| 984                                                    | 16.63326333                                           | 14.40149244                      | 13.7009196     |               | 1287                   |
| 13.18069078                                            | 12.36959923                                           | 10.13117036                      |                |               |                        |
| ENSG00000226210                                        | 192.0556382                                           | 329.9946061                      | 315.8288884    |               |                        |
| 359.6390035                                            | 385.6488683                                           | 471.9646649                      | 279.2930442    |               |                        |
| 405.7508455                                            | -0.536524599                                          | 0.038459947                      | 0.158047639    |               | WASH8P                 |
| 12                                                     | 14522                                                 | 32015                            | -              | 1817          | unprocessed_pseudogene |
| "WAS protein family homolog 8, pseudogene [Source:HGNC |                                                       |                                  |                |               |                        |
| Symbol;Acc:HGNC:53913]"                                | -                                                     | 166                              | 356            | 323           | 358                    |
| 481                                                    | 4.996292706                                           | 8.638314839                      | 8.234743021    |               | 422                    |
| 9.52641103                                             | 10.1208298                                            | 12.35765837                      |                |               |                        |
| ENSG00000163121                                        | 0                                                     | 0                                | 0.977798416    | 0             | 13.70789816            |
| 12.75580175                                            | 0.325932805                                           | 8.821233305                      | -4.600276392   |               |                        |
| 0.038479605                                            | 1                                                     | NEURL3                           | 2              | 96497643      |                        |
| 96508109                                               | -                                                     | 2497                             | protein_coding | neuralized E3 |                        |
| ubiquitin protein ligase 3 [Source:HGNC                | Symbol;Acc:HGNC:25162]                                | -                                |                |               |                        |
| 0                                                      | 0                                                     | 1                                | 0              | 15            | 13                     |
| 0.018551709                                            | 0                                                     | 0.261776896                      | 0.243036133    |               | 0                      |
| ENSG00000221843                                        | 85.615164                                             | 75.08304241                      | 51.82331606    |               |                        |
| 139.6363729                                            | 124.2849433                                           | 104.0088451                      | 70.84050749    |               |                        |
| 122.6433871                                            | -0.793839246                                          | 0.038506441                      | 0.158196174    |               |                        |
| C2orf16                                                | 2                                                     | 27537386                         | 27582721       | +             | 16402                  |
| protein_coding                                         | chromosome 2 open reading frame 16 [Source:HGNC       |                                  |                |               |                        |
| Symbol;Acc:HGNC:25275]                                 | -                                                     | 74                               | 81             | 53            | 139                    |
| 106                                                    | 0.246734355                                           | 0.217731954                      | 0.149686115    |               | 136                    |
| 0.409750233                                            | 0.361327236                                           | 0.301685956                      |                |               |                        |
| ENSG00000156976                                        | 13153.49729                                           | 12766.89806                      | 8544.980359    |               |                        |

|                                    |                                                    |                                |                 |                         |
|------------------------------------|----------------------------------------------------|--------------------------------|-----------------|-------------------------|
| 13538.7007                         | 17867.78832                                        | 12871.58518                    | 11488.45857     |                         |
| 14759.35807                        | -0.361507414                                       | 0.038533486                    | 0.158235962     | EIF4A2                  |
| 3                                  | 186783205                                          | 186789900                      | + 6133          |                         |
| protein_coding                     | eukaryotic translation initiation factor 4A2       |                                |                 |                         |
| [Source:HGNC Symbol;Acc:HGNC:3284] | -                                                  | 11369                          | 13773           | 8739                    |
| 13477                              | 19552                                              | 13118                          | 101.378069      | 99.01238931             |
| 66.00718783                        | 106.2481753                                        | 138.9238536                    | 99.84830521     |                         |
| ENSG00000244306                    | 745.0833192                                        | 646.0849452                    | 770.5051519     |                         |
| 847.8640194                        | 915.6875972                                        | 987.1028126                    | 720.5578054     |                         |
| 916.8848097                        | -0.348038458                                       | 0.038536828                    | 0.158235962     |                         |
| DUXAP10 14                         | 19268853                                           | 19337730                       | - 12311         |                         |
| transcribed_processed_pseudogene   | double homeobox A pseudogene                       |                                |                 |                         |
| 10 [Source:NCBI gene;Acc:503639]   | -                                                  | 644                            | 697             | 788                     |
| 844                                | 1002                                               | 1006                           | 2.860798364     | 2.496165663             |
| 2.965072671                        | 3.314746585                                        | 3.546769686                    | 3.814614763     |                         |
| ENSG00000186468                    | 4003.087398                                        | 3828.308212                    | 3674.566448     |                         |
| 4294.571899                        | 4296.969144                                        | 5429.065469                    | 3835.320686     |                         |
| 4673.535504                        | -0.28521293                                        | 0.038569891                    | 0.158329194     | RPS23                   |
| 5                                  | 82273358                                           | 82278577                       | - 4204          |                         |
| protein_coding                     | ribosomal protein S23 [Source:HGNC                 |                                |                 |                         |
| Symbol;Acc:HGNC:10410]             | -                                                  | 3460                           | 4130            | 3758 4275 4702          |
| 5533                               | 45.00990582                                        | 43.31330287                    | 41.40916986     |                         |
| 49.16710396                        | 48.73921332                                        | 61.43898024                    |                 |                         |
| ENSG00000108384                    | 746.2402808                                        | 590.4678767                    | 640.4579626     |                         |
| 474.1609208                        | 495.3120536                                        | 541.6309667                    | 659.0553734     |                         |
| 503.7013137                        | 0.386978966                                        | 0.038585343                    | 0.158350105     | RAD51C                  |
| 17                                 | 58692573                                           | 58735611                       | + 6068          |                         |
| protein_coding                     | RAD51 paralog C [Source:HGNC Symbol;Acc:HGNC:9820] |                                |                 |                         |
| -                                  | 645                                                | 637                            | 655 472         | 542 552                 |
| 5.813114205                        | 4.628367317                                        | 5.000324437                    | 3.760950721     |                         |
| 3.892353828                        | 4.246582263                                        |                                |                 |                         |
| ENSG00000240661                    | 1.156961676                                        | 12.97731597                    | 3.911193665     | 0                       |
| 0                                  | 0                                                  | 6.015157104                    | 0               | 5.086198519             |
| 0.038627052                        | 1                                                  | AC063952.1                     | 3               | 120349449               |
| 120423826                          | + 4265                                             | transcribed_unitary_pseudogene |                 | novel                   |
| V-set domain-containing            | pseudogene                                         |                                | -               | 1 14 4                  |
| 0                                  | 0                                                  | 0                              | 0.012822588     | 0.1447248               |
| 0.043445361                        | 0                                                  | 0                              | 0               |                         |
| ENSG00000261465                    | 0                                                  | 0                              | 0               | 4.018312888 17.36333767 |
| 0                                  | 0                                                  | 7.127216853                    | -5.255088795    | 0.038644384             |
| 1                                  | AC099518.4                                         | 16                             | 19062499        | 19067691                |
| -                                  | 696                                                | antisense                      | uncharacterized | LOC102723385            |
| [Source:NCBI gene;Acc:102723385]   | -                                                  | 0                              | 0               | 0                       |
| 4                                  | 19                                                 | 0                              | 0               | 0 0.277876595           |
| 1.189605488                        | 0                                                  |                                |                 |                         |
| ENSG00000101849                    | 836.4832915                                        | 869.4801701                    | 948.4644637     |                         |
| 1192.43435                         | 1082.923955                                        | 1045.975744                    | 884.8093084     |                         |
| 1107.111349                        | -0.32300972                                        | 0.038686629                    | 0.158703748     | TBL1X                   |
| X                                  | 9463295                                            | 9741037                        | + 9092          | protein_coding          |
| transducin beta like 1 X-linked    | [Source:HGNC Symbol;Acc:HGNC:11585]                |                                |                 |                         |

|                                    |                                                |                      |              |             |                        |             |              |
|------------------------------------|------------------------------------------------|----------------------|--------------|-------------|------------------------|-------------|--------------|
| -                                  | 723                                            | 938                  | 970          | 1187        | 1185                   | 1066        |              |
| 4.348841535                        | 4.548596044                                    |                      | 4.942136804  |             | 6.31237089             |             |              |
| 5.679596999                        | 5.473231446                                    |                      |              |             |                        |             |              |
| ENSG00000116906                    | 1767.83744                                     |                      | 1646.265226  |             | 1555.67728             |             |              |
| 1205.493866                        | 1338.80472                                     |                      | 1471.823279  |             | 1656.593316            |             |              |
| 1338.707289                        | 0.307101003                                    |                      | 0.038692279  |             | 0.158703748            |             | GNPAT        |
| 1                                  | 231241207                                      |                      | 231277973    |             | +                      | 3261        |              |
| protein_coding                     | glyceronephosphate 0-acyltransferase           |                      |              |             |                        |             | [Source:HGNC |
| Symbol;Acc:HGNC:4416]              | -                                              |                      | 1528         | 1776        | 1591                   | 1200        | 1465         |
| 1500                               | 25.62520027                                    |                      | 24.01187758  |             | 22.6006972             |             |              |
| 17.79228243                        | 19.57696767                                    |                      | 21.47269207  |             |                        |             |              |
| ENSG00000280913                    | 0                                              | 0                    | 0            | 26.11903377 | 0                      | 0           |              |
| 0                                  | 8.706344591                                    |                      | -5.540382146 |             | 0.038696119            |             | 1            |
| CTSLP2                             | 10                                             | 46753605             |              | 46759740    | +                      |             | 1476         |
| transcribed_unprocessed_pseudogene |                                                |                      |              |             | cathepsin L pseudogene |             |              |
| 2 [Source:NCBI gene;Acc:1517]      | -                                              |                      | 0            |             | 0                      | 0           | 26           |
| 0                                  | 0                                              | 0                    | 0            | 0           | 0.851703059            |             | 0            |
| 0                                  |                                                |                      |              |             |                        |             |              |
| ENSG00000263017                    | 0                                              | 0                    | 0            | 26.11903377 | 0                      | 0           |              |
| 0                                  | 8.706344591                                    |                      | -5.540382146 |             | 0.038696119            |             | 1            |
| AC036164.1                         | 17                                             |                      | 959034       | 959366      | +                      | 333         |              |
| processed_pseudogene               | chromosome 19 open reading frame 70 (C19orf70) |                      |              |             |                        |             |              |
| pseudogene                         | -                                              | 0                    | 0            | 0           | 26                     | 0           | 0            |
| 0                                  | 0                                              | 0                    | 3.775116261  |             | 0                      | 0           |              |
| ENSG00000271524                    | 6.941770054                                    |                      | 0            | 13.68917783 | 0                      | 0           |              |
| 0                                  | 6.876982627                                    |                      | 0            | 5.27368853  | 0.038715404            |             |              |
| 1                                  | BNIP3P17                                       |                      | 19           | 20221869    | 20222463               |             |              |
| +                                  | 595                                            | processed_pseudogene |              |             | BCL2 interacting       |             |              |
| protein 3 pseudogene 17            | [Source:HGNC Symbol;Acc:HGNC:49697]            |                      |              |             | -                      |             |              |
| 6                                  | 0                                              | 14                   | 0            | 0           | 0                      | 0.551479023 |              |
| 0                                  | 1.089967443                                    |                      | 0            | 0           | 0                      |             |              |
| ENSG00000272419                    | 231.3923351                                    |                      | 164.9973031  |             | 190.6706912            |             |              |
| 128.5860124                        | 74.93650995                                    |                      | 155.0320521  |             | 195.6867765            |             |              |
| 119.5181915                        | 0.711379112                                    |                      | 0.038741256  |             | 0.158862011            |             |              |
| LINC01145                          | 1                                              | 145164099            |              | 145216058   | -                      |             | 6056         |
| transcribed_unprocessed_pseudogene |                                                |                      |              |             | long intergenic non-   |             |              |
| protein coding RNA 1145            | [Source:HGNC Symbol;Acc:HGNC:49462]            |                      |              |             | -                      |             |              |
| 200                                | 178                                            | 195                  | 128          | 82          | 158                    | 1.806087729 |              |
| 1.295889866                        |                                                | 1.491595968          |              | 1.021939815 |                        | 0.590046969 |              |
| 1.217915777                        |                                                |                      |              |             |                        |             |              |
| ENSG00000188785                    | 522.9466774                                    |                      | 494.0649581  |             | 404.8085443            |             |              |
| 650.9666879                        | 570.2485635                                    |                      | 652.5083204  |             | 473.9400599            |             |              |
| 624.5745239                        | -0.398577123                                   |                      | 0.038762331  |             | 0.15889224             |             | ZNF548       |
| 19                                 | 57389850                                       |                      | 57402992     |             | +                      | 6161        |              |
| protein_coding                     | zinc finger protein 548                        |                      |              |             |                        |             | [Source:HGNC |
| Symbol;Acc:HGNC:26561]             | zf-C2H2                                        |                      | 452          | 533         | 414                    | 648         | 624          |
| 665                                | 4.012194135                                    |                      | 3.814257055  |             | 3.112802654            |             |              |
| 5.085398769                        | 4.413589915                                    |                      | 5.038676457  |             |                        |             |              |
| ENSG00000161204                    | 1489.009677                                    |                      | 1362.618177  |             | 1309.272079            |             |              |
| 1796.185861                        | 1479.539142                                    |                      | 1915.332694  |             | 1386.966644            |             |              |

|                                              |                                                        |                         |                        |                   |
|----------------------------------------------|--------------------------------------------------------|-------------------------|------------------------|-------------------|
| 1730.352566                                  | -0.319241263                                           | 0.038769416             | 0.15889224             | ABCF3             |
| 3                                            | 184186023                                              | 184194012               | + 5207                 |                   |
| protein_coding                               | ATP binding cassette subfamily F member 3 [Source:HGNC |                         |                        |                   |
| Symbol;Acc:HGNC:72]                          | -                                                      | 1287 1470               | 1339 1788              | 1619              |
| 1952                                         | 13.51716708                                            | 12.44697207             | 11.91229542            |                   |
| 16.602793                                    | 13.54933151                                            | 17.50000898             |                        |                   |
| ENSG00000219992                              | 4.627846703                                            | 5.561706845             | 6.844588913            | 0                 |
| 0                                            | 0                                                      | 5.678047487             | 0                      | 4.99911281        |
| 0.038782119                                  | 1                                                      | AL391422.1              | 6                      | 3754099 3754840 + |
| 436                                          | processed_pseudogene                                   | FUN14 domain containing | 1                      |                   |
| (FUNDC1) pseudogene                          | -                                                      | 4                       | 6                      | 7 0 0             |
| 0                                            | 0.501727857                                            | 0.60673454              | 0.743727785            | 0                 |
| 0                                            | 0                                                      |                         |                        |                   |
| ENSG00000257403                              | 0                                                      | 1.853902282             | 0                      | 0 31.07123583     |
| 4.906077597                                  | 0.617967427                                            | 11.99243781             | -4.226191284           |                   |
| 0.038792703                                  | 1                                                      | AC008740.1              | 16                     | 21347139          |
| 21352138                                     | +                                                      | 255                     | unprocessed_pseudogene | BTG3              |
| associated nuclear protein (BNAP) pseudogene | -                                                      | 0                       |                        | 2                 |
| 0                                            | 0                                                      | 34                      | 5                      | 0 0.345799032 0   |
| 0                                            | 5.810283647                                            | 0.915326129             |                        |                   |
| ENSG00000173559                              | 569.2251445                                            | 633.1076292             | 429.2535047            |                   |
| 771.5160745                                  | 647.9266531                                            | 755.53595               | 543.8620928            |                   |
| 724.9928925                                  | -0.414522688                                           | 0.03879813              | 0.158967305            | NABP1             |
| 2                                            | 191678068                                              | 191696659               | + 13806                |                   |
| protein_coding                               | nucleic acid binding protein 1 [Source:HGNC            |                         |                        |                   |
| Symbol;Acc:HGNC:26232]                       | -                                                      | 492 683                 | 439 768                | 709               |
| 770                                          | 1.948910729                                            | 2.181156324             | 1.472987655            |                   |
| 2.689642555                                  | 2.23788087                                             | 2.603567801             |                        |                   |
| ENSG00000184787                              | 4535.289769                                            | 4308.468903             | 3850.570163            |                   |
| 5588.468649                                  | 4448.669883                                            | 5436.915193             | 4231.442945            |                   |
| 5158.017909                                  | -0.285689236                                           | 0.03883569              | 0.159078561            | UBE2G2            |
| 21                                           | 44768580                                               | 44802019                | - 7388                 |                   |
| protein_coding                               | ubiquitin conjugating enzyme E2 G2 [Source:HGNC        |                         |                        |                   |
| Symbol;Acc:HGNC:12483]                       | -                                                      | 3920 4648               | 3938 5563              | 4868              |
| 5541                                         | 29.01709242                                            | 27.73787525             | 24.69171644            |                   |
| 36.40687391                                  | 28.71324526                                            | 35.01122442             |                        |                   |
| ENSG00000223949                              | 4.627846703                                            | 11.12341369             | 0.977798416            |                   |
| 13.05951689                                  | 46.60685375                                            | 15.69944831             | 5.576352936            |                   |
| 25.12193965                                  | -2.16527462                                            | 0.038894903             | 0.159278431            | ROR1-             |
| AS1                                          | 1                                                      | 64094442                | 64171297               | - 3544            |
| antisense                                    | ROR1 antisense RNA 1 [Source:HGNC                      |                         |                        |                   |
| Symbol;Acc:HGNC:40508]                       | -                                                      | 4 12                    | 1 13                   | 51                |
| 16                                           | 0.061724985                                            | 0.149286828             | 0.013070998            |                   |
| 0.17735803                                   | 0.627097487                                            | 0.210752291             |                        |                   |
| ENSG00000100077                              | 285.7695339                                            | 234.5186386             | 303.117509             |                   |
| 157.7187809                                  | 180.0303959                                            | 223.7171384             | 274.4685605            |                   |
| 187.1554384                                  | 0.551839097                                            | 0.03892112              | 0.159343108            | GRK3              |
| 22                                           | 25564849                                               | 25729294                | + 9303                 |                   |
| protein_coding                               | G protein-coupled receptor kinase 3 [Source:HGNC       |                         |                        |                   |
| Symbol;Acc:HGNC:290]                         | -                                                      | 247 253                 | 310 157                | 197               |



|                                                            |                                                     |             |             |                |                     |
|------------------------------------------------------------|-----------------------------------------------------|-------------|-------------|----------------|---------------------|
| 228                                                        | 1.452006783                                         | 1.19903389  | 1.543622601 |                |                     |
| 0.815976869                                                | 0.922787712                                         | 1.144083868 |             |                |                     |
| ENSG00000143727                                            | 1833.784256                                         | 1670.365956 | 1290.693909 |                |                     |
| 1166.315316                                                | 1324.182962                                         | 1283.429899 | 1598.281374 |                |                     |
| 1257.976059                                                | 0.344956788                                         | 0.038938815 | 0.159372868 | ACP1           |                     |
| 2                                                          | 264140                                              | 278283      | +           | 4160           | protein_coding acid |
| phosphatase 1 [Source:HGNC Symbol;Acc:HGNC:122]            | -                                                   | 1585        | 1802        |                |                     |
| 1320                                                       | 1161                                                | 1449        | 1308        | 20.83678203    | 19.09833091         |
| 14.69883979                                                | 13.49398135                                         | 15.17866768 | 14.67778254 |                |                     |
| ENSG00000254944                                            | 10.41265508                                         | 3.707804563 | 1.955596832 |                |                     |
| 39.17855066                                                | 23.76035681                                         | 7.849724156 | 5.358685492 |                |                     |
| 23.59621054                                                | -2.157446961                                        | 0.038960998 | 0.15942098  |                |                     |
| ATP5BP5                                                    | 11                                                  | 122960327   | 122961086   | +              | 760                 |
| processed_pseudogene                                       | ATP synthase peripheral stalk-membrane              |             |             |                |                     |
| subunit b pseudogene 5 [Source:HGNC Symbol;Acc:HGNC:39746] | -                                                   |             |             |                |                     |
| 9                                                          | 4                                                   | 2           | 39          | 26             | 8                   |
| 0.23204935                                                 | 0.121904253                                         | 2.48114549  | 1.490796462 |                |                     |
| 0.491385606                                                |                                                     |             |             |                |                     |
| ENSG00000184304                                            | 159.6607112                                         | 239.1533943 | 253.2497898 |                |                     |
| 155.7096244                                                | 147.1314403                                         | 119.7082934 | 217.3546318 |                |                     |
| 140.849786                                                 | 0.62763                                             | 0.03899867  | 0.159532423 | PRKD1          | 14                  |
| 29576479                                                   | 30191898                                            | -           | 5187        | protein_coding |                     |
| protein kinase D1 [Source:HGNC Symbol;Acc:HGNC:9407]       | -                                                   |             |             |                |                     |
| 138                                                        | 258                                                 | 259         | 155         | 161            | 122                 |
| 2.192993861                                                | 2.313055066                                         | 1.444829721 | 1.352596396 |                |                     |
| 1.097967837                                                |                                                     |             |             |                |                     |
| ENSG00000254978                                            | 2.313923351                                         | 7.415609127 | 10.75578258 |                |                     |
| 17.07782977                                                | 26.50193645                                         | 33.36132766 | 6.828438352 |                |                     |
| 25.64703129                                                | -1.896887272                                        | 0.039032639 | 0.159619178 |                |                     |
| ALG1L9P 11                                                 | 71800541                                            | 71804640    | -           | 549            |                     |
| transcribed_unprocessed_pseudogene                         | "asparagine-linked                                  |             |             |                |                     |
| glycosylation 1-like 9, pseudogene [Source:HGNC            |                                                     |             |             |                |                     |
| Symbol;Acc:HGNC:44378]"                                    | -                                                   | 2           | 8           | 11             | 17                  |
| 34                                                         | 0.199228912                                         | 0.642468147 | 0.92815989  |                | 29                  |
| 1.497193019                                                | 2.30188833                                          | 2.891030067 |             |                |                     |
| ENSG00000138678                                            | 59.00504546                                         | 38.93194792 | 32.26734773 |                |                     |
| 132.6043253                                                | 60.31475191                                         | 71.62873292 | 43.40144704 |                |                     |
| 88.18260338                                                | -1.0258638                                          | 0.039042284 | 0.159619178 | GPAT3          |                     |
| 4                                                          | 83535914                                            | 83605875    | +           | 3468           |                     |
| protein_coding                                             | glycerol-3-phosphate acyltransferase 3 [Source:HGNC |             |             |                |                     |
| Symbol;Acc:HGNC:28157]                                     | -                                                   | 51          | 42          | 33             | 132                 |
| 73                                                         | 0.804240242                                         | 0.533954388 | 0.440795657 |                | 66                  |
| 1.840331496                                                | 0.829322493                                         | 0.98262952  |             |                |                     |
| ENSG00000270021                                            | 3.470885027                                         | 0.926951141 | 3.911193665 |                |                     |
| 24.10987733                                                | 8.224738897                                         | 14.71823279 | 2.769676611 |                |                     |
| 15.68428301                                                | -2.511425703                                        | 0.039053191 | 1           | AC026691.1     |                     |
| 5                                                          | 135399280                                           | 135401296   | +           | 2017           |                     |
| antisense                                                  | "novel transcript, antisense to H2AFY"              | -           |             |                | 3                   |
| 1                                                          | 4                                                   | 24          | 9           | 15             | 0.081341105         |
| 0.021858888                                                | 0.091866368                                         | 0.575316143 | 0.194444297 |                |                     |

|                                                               |              |          |             |             |                  |
|---------------------------------------------------------------|--------------|----------|-------------|-------------|------------------|
| 0.347161372                                                   |              |          |             |             |                  |
| ENSG00000167670                                               | 1760.89567   |          | 2084.713116 | 2353.560788 |                  |
| 1714.815025                                                   | 1368.962096  |          | 1810.342633 | 2066.389858 |                  |
| 1631.373252                                                   | 0.341522363  |          | 0.039057484 | 0.159619178 | CHAF1A           |
| 19                                                            | 4402662      | 4445018  | +           | 4299        | protein_coding   |
| chromatin assembly factor 1 subunit A [Source:HGNC            |              |          |             |             |                  |
| Symbol;Acc:HGNC:1910]                                         | -            |          | 1522        | 2249        | 2407 1707 1498   |
| 1845                                                          | 19.36163016  |          | 23.06513327 | 25.93648394 |                  |
| 19.19849975                                                   | 15.18458636  |          | 20.03433637 |             |                  |
| ENSG00000114391                                               | 9918.632446  |          | 10402.2457  | 9954.965675 |                  |
| 9815.733807                                                   | 12785.81354  |          | 14990.02949 | 10091.94794 |                  |
| 12530.52561                                                   | -0.312243991 |          | 0.039061644 | 0.159619178 | RPL24            |
| 3                                                             | 101681091    |          | 101686782   | -           | 2682             |
| protein_coding ribosomal protein L24 [Source:HGNC             |              |          |             |             |                  |
| Symbol;Acc:HGNC:10325]                                        | -            |          | 8573        | 11222       | 10181 9771 13991 |
| 15277                                                         | 174.8110023  |          | 184.4783684 | 175.8466583 |                  |
| 176.1495168                                                   | 227.3257229  |          | 265.904288  |             |                  |
| ENSG00000128203                                               | 102.9695891  |          | 112.161088  | 124.1803989 |                  |
| 210.9614266                                                   | 176.3749563  |          | 145.2198969 | 113.103692  |                  |
| 177.5187599                                                   | -0.649241777 |          | 0.03911968  | 0.159813616 | ASPHD2           |
| 22                                                            | 26429273     |          | 26445015    | +           | 3357             |
| protein_coding aspartate beta-hydroxylase domain containing 2 |              |          |             |             |                  |
| [Source:HGNC Symbol;Acc:HGNC:30437]                           | -            |          |             | 89          | 121 127          |
| 210                                                           | 193          | 148      | 1.449884403 | 1.589161324 |                  |
| 1.752487123                                                   | 3.024608512  |          | 2.505327846 | 2.058052314 |                  |
| ENSG00000155506                                               | 5510.608461  |          | 6245.796787 | 6945.30215  |                  |
| 8970.883523                                                   | 6659.296927  |          | 7444.482146 | 6233.902466 |                  |
| 7691.554199                                                   | -0.302984293 |          | 0.039151262 | 0.159875269 | LARP1            |
| 5                                                             | 154712902    |          | 154817607   | +           | 8492             |
| protein_coding La ribonucleoprotein domain family member 1    |              |          |             |             |                  |
| [Source:HGNC Symbol;Acc:HGNC:29531]                           | -            |          |             | 4763        | 6738 7103        |
| 8930                                                          | 7287         | 7587     | 30.67363948 | 34.98283318 |                  |
| 38.74666117                                                   | 50.84434886  |          | 37.39360893 | 41.70672942 |                  |
| ENSG00000074964                                               | 444.2732835  |          | 482.0145932 | 647.3025515 |                  |
| 356.6252688                                                   | 387.476588   |          | 411.1293027 | 524.5301427 |                  |
| 385.0770532                                                   | 0.446432314  |          | 0.039155688 | 0.159875269 |                  |
| ARHGEF10L                                                     | 1            | 17539835 | 17697874    | +           | 7817             |
| protein_coding Rho guanine nucleotide exchange factor 10 like |              |          |             |             |                  |
| [Source:HGNC Symbol;Acc:HGNC:25540]                           | -            |          |             | 384         | 520 662          |
| 355                                                           | 424          | 419      | 2.686493692 | 2.932899555 |                  |
| 3.923018293                                                   | 2.195783198  |          | 2.36365639  | 2.502188057 |                  |
| ENSG00000068784                                               | 466.2555553  |          | 438.4478896 | 463.4764493 |                  |
| 345.5749084                                                   | 362.8023713  |          | 318.8950438 | 456.0599647 |                  |
| 342.4241078                                                   | 0.41303632   |          | 0.03921661  | 0.160081259 | SRBD1            |
| 2                                                             | 45388680     |          | 45612165    | -           | 5045             |
| protein_coding S1 RNA binding domain 1 [Source:HGNC           |              |          |             |             |                  |
| Symbol;Acc:HGNC:25521]                                        | -            |          | 403         | 473         | 474 344 397      |
| 325                                                           | 4.368562851  |          | 4.133652155 | 4.352308054 |                  |
| 3.296844689                                                   | 3.429161459  |          | 3.007240948 |             |                  |
| ENSG00000238078                                               | 16.19746346  |          | 27.80853423 | 8.800185745 |                  |

|                                     |                     |                                        |                |             |
|-------------------------------------|---------------------|----------------------------------------|----------------|-------------|
| 40.18312888                         | 41.12369448         | 55.92928461                            | 17.60206114    |             |
| 45.74536932                         | -1.374187447        | 0.039268966                            | 0.160252186    |             |
| LINC01352                           | 1                   | 220829255                              | 220832429      | +           |
|                                     | lincRNA             | long intergenic non-protein coding RNA | 1352           | 962         |
| [Source:HGNC Symbol;Acc:HGNC:50578] |                     | -                                      | 14             | 30          |
|                                     | 40                  | 45                                     | 57             | 0.795880156 |
| 0.433381026                         | 2.010416944         | 2.038431113                            | 2.765959517    |             |
| ENSG00000136891                     | 2103.356326         | 1831.655454                            | 1451.05285     |             |
| 2245.232326                         | 2511.286943         | 2059.571375                            | 1795.354877    |             |
| 2272.030215                         | -0.340195754        | 0.039284505                            | 0.160272813    | TEX10       |
|                                     | 9                   | 100302077                              | 100352939      | -           |
|                                     |                     |                                        |                | 7261        |
| protein_coding                      | testis expressed    | 10                                     | [Source:HGNC   |             |
| Symbol;Acc:HGNC:25988]              |                     | -                                      | 1818           | 1976        |
|                                     | 2099                | 13.69279653                            | 11.99843109    | 1484        |
|                                     |                     |                                        |                | 2235        |
| 14.88271987                         | 16.49221126         | 13.49466282                            | 9.467600414    | 2748        |
| ENSG00000150625                     | 41.65062033         | 63.95962872                            | 38.13413823    |             |
| 5.02289111                          | 29.24351608         | 17.66187935                            | 47.91479576    |             |
| 17.30942885                         | 1.465503744         | 0.039339803                            | 0.160455595    | GPM6A       |
|                                     | 4                   | 175632934                              | 176002664      | -           |
|                                     |                     |                                        |                | 7040        |
| protein_coding                      | glycoprotein        | M6A                                    | [Source:HGNC   |             |
| Symbol;Acc:HGNC:4460]               |                     | -                                      | 36             | 69          |
|                                     |                     |                                        | 39             | 5           |
|                                     |                     |                                        | 32             | 18          |
| 0.279656266                         | 0.432125992         | 0.256622306                            | 0.034339863    |             |
| 0.198077852                         | 0.119356447         |                                        |                |             |
| ENSG00000103018                     | 3539.145766         | 3608.620791                            | 3875.992922    |             |
| 3170.448869                         | 3210.389749         | 2806.276386                            | 3674.586493    |             |
| 3062.371668                         | 0.262963222         | 0.039429859                            | 0.16078001     | CYB5B       |
|                                     | 16                  | 69424525                               | 69466266       | +           |
|                                     |                     |                                        |                | 6903        |
| protein_coding                      | cytochrome b5       | type B                                 | [Source:HGNC   |             |
| Symbol;Acc:HGNC:24374]              |                     | -                                      | 3059           | 3893        |
|                                     | 2860                | 24.23462569                            | 24.86454339    | 3964        |
|                                     |                     |                                        |                | 3156        |
| 22.10549975                         | 22.17679971         | 19.34078938                            | 26.60101623    | 3513        |
| ENSG00000134262                     | 998.4579261         | 786.9815186                            | 776.3719424    |             |
| 1185.402302                         | 1059.163598         | 1022.426571                            | 853.9371291    |             |
| 1088.99749                          | -0.351626562        | 0.039454625                            | 0.160838093    | AP4B1       |
|                                     | 1                   | 113894748                              | 113905201      | -           |
|                                     |                     |                                        |                | 5369        |
| protein_coding                      | adaptor related     | protein complex                        | 4 subunit beta | 1           |
| [Source:HGNC Symbol;Acc:HGNC:572]   |                     | -                                      | 863            | 849         |
|                                     | 1180                | 1159                                   | 1042           | 8.79047017  |
| 6.850614891                         | 10.62648956         | 9.40694554                             | 9.059836305    |             |
| ENSG00000188283                     | 230.2353735         | 268.8158308                            | 191.6484896    |             |
| 289.3185279                         | 381.9934288         | 316.9326128                            | 230.2332313    |             |
| 329.4148565                         | -0.516864198        | 0.039469381                            | 0.160855351    | ZNF383      |
|                                     | 19                  | 37217926                               | 37248738       | +           |
|                                     |                     |                                        |                | 8417        |
| protein_coding                      | zinc finger protein | 383                                    | [Source:HGNC   |             |
| Symbol;Acc:HGNC:18609]              |                     | zf-C2H2                                | 199            | 290         |
|                                     | 323                 | 1.292975995                            | 1.519058953    | 196         |
|                                     |                     |                                        |                | 288         |
| 1.654384213                         | 2.164101133         | 1.791394477                            | 1.078701295    | 418         |
| ENSG00000147100                     | 666.4099252         | 777.7120072                            | 447.8316746    |             |
| 683.113191                          | 965.9498904         | 963.5536401                            | 630.6512023    |             |
| 870.8722405                         | -0.465768664        | 0.039491544                            | 0.160902781    |             |

|                        |                                               |                           |              |             |           |
|------------------------|-----------------------------------------------|---------------------------|--------------|-------------|-----------|
| SLC16A2 X              | 74421461                                      | 74533917                  | +            | 4324        |           |
| protein_coding         | solute carrier family 16 member 2             |                           | [Source:HGNC |             |           |
| Symbol;Acc:HGNC:10923] | -                                             | 576 839                   | 458          | 680         | 1057      |
| 982                    | 7.28503279                                    | 8.554807343               | 4.906618009  |             |           |
| 7.603690725            | 10.65241064                                   | 10.60161035               |              |             |           |
| ENSG00000279901        | 8.09873173                                    | 0.926951141               | 8.800185745  | 0           |           |
| 0                      | 0                                             | 5.941956205               | 0            | 5.061292669 |           |
| 0.039521185            | 1                                             | AC092117.2                | 16           | 2683106     | 2684764 + |
| 1659                   | TEC                                           | tec                       | -            | 7           | 1 9 0     |
| 0                      | 0                                             | 0.230752474               | 0.026575875  | 0.251303524 |           |
| 0                      | 0                                             | 0                         |              |             |           |
| ENSG00000100938        | 940.6098424                                   | 1061.359056               | 912.2859223  |             |           |
| 1068.871228            | 1286.714707                                   | 1314.828796               | 971.4182736  |             |           |
| 1223.471577            | -0.33267994                                   | 0.039523581               | 0.160990405  | GMPR2       |           |
| 14                     | 24232422                                      | 24239242                  | +            | 3640        |           |
| protein_coding         | guanosine monophosphate reductase 2           |                           | [Source:HGNC |             |           |
| Symbol;Acc:HGNC:4377]  | -                                             | 813 1145                  | 933          | 1064        | 1408      |
| 1340                   | 12.21473009                                   | 13.86877368               | 11.87360825  |             |           |
| 14.13323111            | 16.8562075                                    | 17.1849966                |              |             |           |
| ENSG00000116729        | 2020.055086                                   | 1904.884594               | 2442.540444  |             |           |
| 1749.975263            | 1474.055982                                   | 1862.347056               | 2122.493375  |             |           |
| 1695.459434            | 0.324277934                                   | 0.039548503               | 0.161013479  | WLS         |           |
| 1                      | 68098473                                      | 68233120                  | -            | 4469        |           |
| protein_coding         | wntless Wnt                                   | ligand secretion mediator | [Source:HGNC |             |           |
| Symbol;Acc:HGNC:30238] | -                                             | 1746 2055                 | 2498         | 1742        | 1613      |
| 1898                   | 21.36626436                                   | 20.27381268               | 25.89312901  |             |           |
| 18.84686035            | 15.72832992                                   | 19.82585334               |              |             |           |
| ENSG00000181788        | 787.8909012                                   | 946.4171148               | 851.6624205  |             |           |
| 1246.681574            | 1040.8864                                     | 999.8586143               | 861.9901455  |             |           |
| 1095.808863            | -0.345555313                                  | 0.039551997               | 0.161013479  | SIAH2       |           |
| 3                      | 150741127                                     | 150763477                 | -            | 2617        |           |
| protein_coding         | siah E3 ubiquitin protein ligase 2            |                           | [Source:HGNC |             |           |
| Symbol;Acc:HGNC:10858] | -                                             | 681 1021                  | 871          | 1241        | 1139      |
| 1019                   | 14.23108793                                   | 17.20109037               | 15.41760405  |             |           |
| 22.92816378            | 18.96612459                                   | 18.17676101               |              |             |           |
| ENSG00000040341        | 1173.159139                                   | 985.3490627               | 1115.667993  |             |           |
| 729.3237892            | 965.9498904                                   | 866.4133037               | 1091.392065  |             |           |
| 853.8956611            | 0.353331873                                   | 0.039571307               | 0.161013479  | STAU2       |           |
| 8                      | 73420369                                      | 73747708                  | -            | 8998        |           |
| protein_coding         | staufen double-stranded RNA binding protein 2 |                           | [Source:HGNC |             |           |
| Symbol;Acc:HGNC:11371] | -                                             | 1014 1063                 | 1141         |             |           |
| 726                    | 1057 883                                      | 6.16292211                | 5.208602723  |             |           |
| 5.874110493            | 3.901142805                                   | 5.119029075               | 4.58100484   |             |           |
| ENSG00000105499        | 54.37719876                                   | 101.9646255               | 79.20167171  |             |           |
| 150.6867333            | 200.1353132                                   | 80.4596726                | 78.51449865  |             |           |
| 143.760573             | -0.870074206                                  | 0.039584932               | 0.161013479  |             |           |
| PLA2G4C 19             | 48047843                                      | 48110817                  | -            | 6613        |           |
| protein_coding         | phospholipase A2 group IVC                    |                           | [Source:HGNC |             |           |
| Symbol;Acc:HGNC:9037]  | -                                             | 47 110                    | 81           | 150         | 219       |
| 82                     | 0.388681659                                   | 0.73337841                | 0.567399504  |             |           |

|                                                                    |              |             |             |             |      |
|--------------------------------------------------------------------|--------------|-------------|-------------|-------------|------|
| 1.096715428                                                        | 1.443125796  | 0.578843773 |             |             |      |
| ENSG00000245694                                                    | 646.7415767  | 558.0245868 | 533.8779352 |             |      |
| 383.7488808                                                        | 487.0873147  | 439.5845527 | 579.5480329 |             |      |
| 436.8069161                                                        | 0.406851073  | 0.039593876 | 0.161013479 | CRNDE       |      |
| 16                                                                 | 54845189     | 54929189    | -           | 5846        |      |
| lincRNA colorectal neoplasia differentially expressed [Source:HGNC |              |             |             |             |      |
| Symbol;Acc:HGNC:37078]                                             | -            | 559         | 602         | 546         | 382  |
| 448                                                                | 5.229349994  | 4.540165019 | 4.32649581  | 533         |      |
| 3.159408399                                                        | 3.973077126  | 3.577381352 |             |             |      |
| ENSG00000100344                                                    | 264.9442237  | 246.5690035 | 349.0740346 |             |      |
| 259.1811813                                                        | 170.8917971  | 120.6895089 | 286.8624206 |             |      |
| 183.5874958                                                        | 0.64456715   | 0.039600404 | 0.161013479 | PNPLA3      |      |
| 22                                                                 | 43923739     | 43964488    | +           | 3232        |      |
| protein_coding patatin like phospholipase domain containing 3      |              |             |             |             |      |
| [Source:HGNC Symbol;Acc:HGNC:18590]                                | -            |             | 229         | 266         | 357  |
| 258                                                                | 187          | 123         | 3.874885224 | 3.628642998 |      |
| 5.116810341                                                        | 3.859664633  | 2.521325128 | 1.776559655 |             |      |
| ENSG00000080854                                                    | 107.5974358  | 53.76316617 | 86.04626062 |             |      |
| 188.8607057                                                        | 96.86914701  | 152.0884055 | 82.46895421 |             |      |
| 145.9394194                                                        | -0.826127412 | 0.039602975 | 0.161013479 | IGSF9B      |      |
| 11                                                                 | 133908564    | 133956985   | -           | 5753        |      |
| protein_coding immunoglobulin superfamily member 9B [Source:HGNC   |              |             |             |             |      |
| Symbol;Acc:HGNC:32326]                                             | -            | 93          | 58          | 88          | 188  |
| 155                                                                | 0.884063148  | 0.444495714 | 0.708583041 | 106         |      |
| 1.580027667                                                        | 0.802915957  | 1.257718242 |             |             |      |
| ENSG00000188906                                                    | 65.94681552  | 64.88657986 | 29.33395248 |             |      |
| 87.39830532                                                        | 106.0077458  | 109.8961382 | 53.38911595 |             |      |
| 101.1007298                                                        | -0.92323155  | 0.039618744 | 0.161034763 | LRRK2       |      |
| 12                                                                 | 40196744     | 40369285    | +           | 13491       |      |
| protein_coding leucine rich repeat kinase 2 [Source:HGNC           |              |             |             |             |      |
| Symbol;Acc:HGNC:18618]                                             | -            | 57          | 70          | 30          | 87   |
| 112                                                                | 0.23106035   | 0.228764092 | 0.103010043 | 116         |      |
| 0.311800155                                                        | 0.374690295  | 0.387543017 |             |             |      |
| ENSG00000166226                                                    | 8385.658226  | 8897.804001 | 8360.176458 |             |      |
| 6836.154801                                                        | 7071.447731  | 7774.170561 | 8547.879562 |             |      |
| 7227.257698                                                        | 0.242150323  | 0.039648603 | 0.161106026 | CCT2        |      |
| 12                                                                 | 69585334     | 69601570    | +           | 4322        |      |
| protein_coding chaperonin containing TCP1 subunit 2 [Source:HGNC   |              |             |             |             |      |
| Symbol;Acc:HGNC:1615]                                              | -            | 7248        | 9599        | 8550        | 6805 |
| 7923                                                               | 91.71241612  | 97.9208528  | 91.63973148 | 7738        |      |
| 76.12802859                                                        | 78.01939182  | 85.5757924  |             |             |      |
| ENSG00000116711                                                    | 397.9948164  | 434.7400851 | 431.2091015 |             |      |
| 249.1353991                                                        | 365.543951   | 300.251949  | 421.3146677 |             |      |
| 304.9770997                                                        | 0.465809149  | 0.039663781 | 0.161106026 |             |      |
| PLA2G4A 1                                                          | 186828953    | 186988981   | +           | 2875        |      |
| protein_coding phospholipase A2 group IVA [Source:HGNC             |              |             |             |             |      |
| Symbol;Acc:HGNC:9035]                                              | -            | 344         | 469         | 441         | 248  |
| 306                                                                | 6.543578342  | 7.192319171 | 7.105639928 | 400         |      |
| 4.170758545                                                        | 6.062904675  | 4.968549413 |             |             |      |
| ENSG00000114698                                                    | 411.8783566  | 239.1533943 | 315.8288884 |             |      |

|                        |                                                       |             |             |             |
|------------------------|-------------------------------------------------------|-------------|-------------|-------------|
| 191.8744404            | 199.2214533                                           | 260.0221127 | 322.2868798 |             |
| 217.0393354            | 0.568778994                                           | 0.039667893 | 0.161106026 | PLSCR4      |
| 3                      | 146192339                                             | 146251179   | - 4227      |             |
| protein_coding         | phospholipid scramblase 4 [Source:HGNC                |             |             |             |
| Symbol;Acc:HGNC:16497] | -                                                     | 356 258     | 323 191     | 218         |
| 265                    | 4.605878346                                           | 2.691047825 | 3.53975114  |             |
| 2.184752957            | 2.247412766                                           | 2.926575024 |             |             |
| ENSG00000164331        | 220.9796801                                           | 231.7377852 | 179.9149086 |             |
| 277.2635893            | 380.165709                                            | 261.9845437 | 210.8774579 |             |
| 306.4712807            | -0.540093945                                          | 0.039678956 | 0.161108154 | ANKRA2      |
| 5                      | 73552335                                              | 73565686    | - 2659      |             |
| protein_coding         | ankyrin repeat family A member 2 [Source:HGNC         |             |             |             |
| Symbol;Acc:HGNC:13208] | -                                                     | 191 250     | 184 276     | 416         |
| 267                    | 3.928346092                                           | 4.145296783 | 3.205545469 |             |
| 5.018708382            | 6.817632561                                           | 4.68747495  |             |             |
| ENSG00000196507        | 334.3619243                                           | 414.34716   | 468.3654413 |             |
| 213.9751613            | 277.8134027                                           | 355.200018  | 405.6915085 |             |
| 282.3295274            | 0.523668536                                           | 0.039742307 | 0.161322528 | TCEAL3      |
| X                      | 103607451                                             | 103629690   | + 2305      |             |
| protein_coding         | transcription elongation factor A like 3 [Source:HGNC |             |             |             |
| Symbol;Acc:HGNC:28247] | -                                                     | 289 447     | 479 213     | 304         |
| 362                    | 6.856802268                                           | 8.550087345 | 9.626469507 |             |
| 4.467966315            | 5.747265386                                           | 7.33134533  |             |             |
| ENSG00000284770        | 299.653074                                            | 318.8711925 | 277.6947502 |             |
| 243.1079297            | 181.8581156                                           | 205.0740436 | 298.7396722 |             |
| 210.013363             | 0.50916613                                            | 0.039791633 | 0.161479875 | TBCE        |
| 1                      | 235367360                                             | 235452443   | + 12444     |             |
| protein_coding         | tubulin folding cofactor E [Source:HGNC               |             |             |             |
| Symbol;Acc:HGNC:11582] | -                                                     | 259 344     | 284 242     | 199         |
| 209                    | 1.138241653                                           | 1.218799867 | 1.057208858 |             |
| 0.940278661            | 0.696869844                                           | 0.784029348 |             |             |
| ENSG00000154723        | 3607.406505                                           | 2959.754993 | 2871.793948 |             |
| 2451.170862            | 2440.005873                                           | 2801.370308 | 3146.318482 |             |
| 2564.182348            | 0.294892155                                           | 0.039825321 | 0.161545105 | ATP5PF      |
| 21                     | 25716503                                              | 25735673    | - 2043      |             |
| protein_coding         | ATP synthase peripheral stalk subunit F6 [Source:HGNC |             |             |             |
| Symbol;Acc:HGNC:847]   | -                                                     | 3118 3193   | 2937 2440   | 2670        |
| 2855                   | 83.46462702                                           | 68.90718523 | 66.59444988 |             |
| 57.74610234            | 56.95101813                                           | 65.23546791 |             |             |
| ENSG00000112695        | 1797.918444                                           | 1578.597793 | 1623.145371 |             |
| 1170.333629            | 1464.917383                                           | 1389.401176 | 1666.553869 |             |
| 1341.550729            | 0.312477757                                           | 0.039837159 | 0.161545105 | COX7A2      |
| 6                      | 75237675                                              | 75250323    | - 1922      |             |
| protein_coding         | cytochrome c oxidase subunit 7A2 [Source:HGNC         |             |             |             |
| Symbol;Acc:HGNC:2288]  | -                                                     | 1554 1703   | 1660 1165   | 1603        |
| 1416                   | 44.2173126                                            | 39.0656651  | 40.00895061 |             |
| 29.30716157            | 36.3445032                                            | 34.39187914 |             |             |
| ENSG00000011590        | 0                                                     | 13.90426711 | 9.777984162 | 44.20144177 |
|                        | 18.27719755                                           | 33.36132766 | 7.894083758 | 31.94665566 |
|                        | -1.998227213                                          | 0.039839409 | 0.161545105 | ZBTB32 19   |

|                                                       |                                               |             |                          |                  |             |
|-------------------------------------------------------|-----------------------------------------------|-------------|--------------------------|------------------|-------------|
| 35704527                                              | 35717038                                      | +           | 2770                     | protein_coding   |             |
| zinc finger and BTB domain containing 32 [Source:HGNC |                                               |             |                          |                  |             |
| Symbol;Acc:HGNC:16763]                                | ZBTB                                          | 0           | 15                       | 10               | 44 20       |
| 34                                                    | 0                                             | 0.238751137 | 0.167233272              | 0.768022819      |             |
| 0.314636299                                           | 0.572987548                                   |             |                          |                  |             |
| ENSG00000254538                                       | 5.784808379                                   | 8.342560268 | 2.933395248              | 0                |             |
| 0                                                     | 0                                             | 5.686921298 | 0                        | 5.001073413      |             |
| 0.03984318                                            | 1                                             | AC027018.1  | 8                        | 73670441         |             |
| 73732897                                              | +                                             | 707         | lincRNA novel transcript | -                |             |
| 5                                                     | 9                                             | 3           | 0                        | 0                | 0.386763341 |
| 0.561250904                                           | 0.196564143                                   | 0           | 0                        | 0                |             |
| ENSG00000235522                                       | 5.784808379                                   | 8.342560268 | 2.933395248              | 0                |             |
| 0                                                     | 0                                             | 5.686921298 | 0                        | 5.001073413      |             |
| 0.03984318                                            | 1                                             | AC010978.1  | 2                        | 105846534        |             |
| 105857177                                             | -                                             | 2166        | antisense                | novel transcript |             |
| -                                                     | 5                                             | 9           | 3                        | 0                | 0           |
| 0.126242697                                           | 0.183196856                                   | 0.064160133 | 0                        | 0                | 0           |
| ENSG00000142552                                       | 2148.477832                                   | 2622.344777 | 3669.677456              |                  |             |
| 1852.442241                                           | 1859.704851                                   | 2638.488532 | 2813.500022              |                  |             |
| 2116.878541                                           | 0.410699784                                   | 0.039856512 | 0.161571601              | RCN3             |             |
| 19                                                    | 49527618                                      | 49546962    | +                        | 2093             |             |
| protein_coding                                        | reticulocalbin 3 [Source:HGNC                 |             |                          |                  |             |
| Symbol;Acc:HGNC:21145]                                | 1857                                          | 2829        | 3753                     | 1844             | 2035 2689   |
| 48.52185416                                           | 59.59333318                                   | 83.06379934 | 42.59836249              |                  |             |
| 42.36954332                                           | 59.97463447                                   |             |                          |                  |             |
| ENSG00000162723                                       | 100.6556658                                   | 262.3271729 | 44.97872714              |                  |             |
| 247.1262426                                           | 624.1662963                                   | 381.6928371 | 135.9871886              |                  |             |
| 417.661792                                            | -1.618239046                                  | 0.039875752 | 0.161606741              | SLAMF9           |             |
| 1                                                     | 159951492                                     | 159954254   | -                        | 1156             |             |
| protein_coding                                        | SLAM family member 9 [Source:HGNC             |             |                          |                  |             |
| Symbol;Acc:HGNC:18430]                                | -                                             | 87          | 283                      | 46               | 246 683     |
| 389                                                   | 4.115817707                                   | 10.79350655 | 1.843327293              |                  |             |
| 10.28912609                                           | 25.74669376                                   | 15.70861165 |                          |                  |             |
| ENSG00000003249                                       | 92.55693406                                   | 152.0199871 | 176.0037149              |                  |             |
| 170.7782977                                           | 243.0867274                                   | 257.0784661 | 140.1935454              |                  |             |
| 223.6478304                                           | -0.671310875                                  | 0.039922589 | 0.161724331              | DBNDD1           |             |
| 16                                                    | 90004865                                      | 90020128    | -                        | 4791             |             |
| protein_coding                                        | dysbindin domain containing 1 [Source:HGNC    |             |                          |                  |             |
| Symbol;Acc:HGNC:28455]                                | -                                             | 80          | 164                      | 180              | 170 266     |
| 262                                                   | 0.913184495                                   | 1.509216815 | 1.74039886               |                  |             |
| 1.715631324                                           | 2.419435583                                   | 2.552825658 |                          |                  |             |
| ENSG00000159314                                       | 39.33669697                                   | 63.95962872 | 46.93432398              |                  |             |
| 135.61806                                             | 58.48703215                                   | 99.10276747 | 50.07688322              |                  |             |
| 97.7359532                                            | -0.960498962                                  | 0.03993531  | 0.161724331              |                  |             |
| ARHGAP27                                              | 17                                            | 45393902    | 45434421                 | -                | 10426       |
| protein_coding                                        | Rho GTPase activating protein 27 [Source:HGNC |             |                          |                  |             |
| Symbol;Acc:HGNC:31813]                                | -                                             | 34          | 69                       | 48               | 135 64      |
| 101                                                   | 0.178342935                                   | 0.29178659  | 0.213268136              |                  |             |
| 0.626061885                                           | 0.267498192                                   | 0.45221992  |                          |                  |             |
| ENSG00000204922                                       | 224.4505651                                   | 332.7754596 | 260.0943787              |                  |             |

|                                                                  |              |             |             |             |
|------------------------------------------------------------------|--------------|-------------|-------------|-------------|
| 284.2956368                                                      | 364.6300911  | 581.860803  | 272.4401345 |             |
| 410.262177                                                       | -0.589344915 | 0.039949126 | 0.161724331 | UQCC3       |
| 11                                                               | 62670273     | 62673687    | +           | 2398        |
| protein_coding ubiquinol-cytochrome c reductase complex assembly |              |             |             |             |
| factor 3 [Source:HGNC Symbol;Acc:HGNC:34399]                     |              |             |             |             |
|                                                                  | -            |             | 194         | 359         |
| 266                                                              | 283          | 399         | 593         | 4.424327468 |
|                                                                  | 5.138482877  | 5.706088107 | 7.250739706 | 6.60053636  |
| ENSG00000227214                                                  | 15.04050178  | 11.12341369 | 1.955596832 |             |
| 59.2701151                                                       | 28.3296562   | 13.73701727 | 9.373170769 |             |
| 33.77892952                                                      | -1.85674064  | 0.039951756 | 0.161724331 | HCG15       |
| 6                                                                | 28986203     | 28987484    | +           | 1032        |
| antisense HLA complex group 15 [Source:HGNC                      |              |             |             |             |
| Symbol;Acc:HGNC:18361]                                           |              |             |             |             |
|                                                                  | -            | 13          | 12          | 2           |
|                                                                  |              |             |             | 59          |
| 14                                                               | 0.688903463  | 0.51266717  | 0.08977445  | 31          |
| 2.764225893                                                      | 1.309002857  | 0.633277961 |             |             |
| ENSG00000143147                                                  | 1277.28569   | 1171.666242 | 1373.806775 |             |
| 1379.285899                                                      | 1658.655678  | 1729.882961 | 1274.252902 |             |
| 1589.274846                                                      | -0.318920822 | 0.039957663 | 0.161724331 | GPR161      |
| 1                                                                | 168079543    | 168137667   | -           | 11224       |
| protein_coding G protein-coupled receptor 161 [Source:HGNC       |              |             |             |             |
| Symbol;Acc:HGNC:23694]                                           |              |             |             |             |
|                                                                  | -            | 1104        | 1264        | 1405        |
|                                                                  |              |             |             | 1373        |
| 1763                                                             | 5.379180633  | 4.965161439 | 5.798706425 | 1815        |
| 5.914582524                                                      | 7.046728987  | 7.332476675 |             |             |
| ENSG00000160323                                                  | 13.88354011  | 31.51633879 | 4.888992081 |             |
| 56.25638043                                                      | 67.62563093  | 23.54917247 | 16.76295699 |             |
| 49.14372794                                                      | -1.54723674  | 0.039984217 | 0.161741913 |             |
| ADAMTS13                                                         | 9            | 133414358   | 133459402   | +           |
|                                                                  |              |             |             | 5708        |
| protein_coding ADAM metalloproteinase with thrombospondin type   |              |             |             |             |
| 1 motif 13 [Source:HGNC Symbol;Acc:HGNC:1366]                    |              |             |             |             |
|                                                                  | -            |             | 12          | 34          |
| 5                                                                | 56           | 74          | 24          | 0.114971976 |
|                                                                  | 0.0405778    | 0.474356962 | 0.564945239 | 0.262620673 |
|                                                                  |              |             |             | 0.196278763 |
| ENSG00000278730                                                  | 386.4251997  | 303.1130231 | 498.6771922 |             |
| 268.2223853                                                      | 253.139186   | 312.0265352 | 396.071805  |             |
| 277.7960355                                                      | 0.511723961  | 0.039997616 | 0.161741913 |             |
| AC005332.6                                                       | 17           | 68126666    | 68129586    | +           |
|                                                                  |              |             |             | 2921        |
| lincRNA novel transcript                                         |              |             |             |             |
|                                                                  | -            |             | 334         | 327         |
| 267                                                              | 277          | 318         | 6.253305159 | 4.935715899 |
| 8.08799874                                                       | 4.419579199  | 4.132442409 | 5.082081189 |             |
| ENSG00000258077                                                  | 20.82531016  | 15.75816939 | 5.866790497 |             |
| 67.30674088                                                      | 41.12369448  | 17.66187935 | 14.15009002 |             |
| 42.03077157                                                      | -1.576081968 | 0.040004068 | 0.161741913 |             |
| AC078923.1                                                       | 12           | 75563202    | 75984015    | -           |
|                                                                  |              |             |             | 1385        |
| lincRNA novel transcript                                         |              |             |             |             |
|                                                                  | -            |             | 18          | 17          |
| 67                                                               | 45           | 18          | 0.710750943 | 0.541169243 |
| 0.200679926                                                      | 2.338978586  | 1.415863344 | 0.606692697 |             |
| ENSG00000204685                                                  | 76.3594706   | 51.90926389 | 71.37928438 |             |
| 125.5722778                                                      | 127.9403828  | 93.21547435 | 66.54933962 |             |
| 115.576045                                                       | -0.79896319  | 0.040004329 | 0.161741913 |             |
| STARD7-AS1                                                       | 2            | 96208416    | 96242621    | +           |
|                                                                  |              |             |             | 2349        |
| processed_transcript STARD7 antisense RNA 1 [Source:HGNC         |              |             |             |             |



|                                                            |              |             |                            |             |             |        |
|------------------------------------------------------------|--------------|-------------|----------------------------|-------------|-------------|--------|
| Symbol;Acc:HGNC:40827]                                     | -            | 66          | 56                         | 73          | 125         | 140    |
| 95                                                         | 1.536581611  | 1.051087735 | 1.439601529                |             |             |        |
| 2.572931433                                                | 2.59718937   | 1.887933203 |                            |             |             |        |
| ENSG00000269845                                            | 21.98227184  | 0           | 9.777984162                | 0           |             |        |
| 0.913859877                                                | 0.981215519  | 10.586752   | 0.631691799                |             |             |        |
| 4.050135404                                                | 0.040024519  | 1           | AC092364.2                 | 19          |             |        |
| 21750747                                                   | 21753438     | +           | 2692                       |             |             |        |
| transcribed_processed_pseudogene                           |              |             | cyclin Y like 1 pseudogene |             |             |        |
| [Source:NCBI gene;Acc:641367]                              | -            | 19          | 0                          | 10          | 0           |        |
| 1                                                          | 1            | 0.385987516 | 0                          | 0.172078812 | 0           |        |
| 0.01618764                                                 | 0.017340874  |             |                            |             |             |        |
| ENSG00000256128                                            | 28.92404189  | 39.85889906 | 68.44588913                |             |             |        |
| 99.45324398                                                | 95.95528713  | 74.57237948 | 45.74294336                |             |             |        |
| 89.99363686                                                | -0.97269142  | 0.040060316 | 0.161907532                |             |             |        |
| LINC00944                                                  | 12           | 126729787   | 126772411                  | -           |             | 1853   |
| lincRNA long intergenic non-protein coding RNA             | 944          |             |                            |             |             |        |
| [Source:HGNC Symbol;Acc:HGNC:48640]                        | -            | 25          | 43                         |             |             | 70     |
| 99                                                         | 105          | 76          | 0.737835084                | 1.023120989 |             |        |
| 1.749947729                                                | 2.583217605  | 2.46929216  | 1.914627131                |             |             |        |
| ENSG00000251322                                            | 21.98227184  | 17.61207168 | 33.24514615                |             |             |        |
| 59.2701151                                                 | 42.95141424  | 62.79779325 | 24.27982989                |             |             |        |
| 55.00644086                                                | -1.179006878 | 0.04007215  | 0.161907532                |             |             | SHANK3 |
| 22                                                         | 50674415     | 50733298    | +                          | 7455        |             |        |
| protein_coding SH3 and multiple ankyrin repeat domains 3   |              |             |                            |             |             |        |
| [Source:HGNC Symbol;Acc:HGNC:14294]                        | -            | 19          | 19                         | 34          | 59          | 47     |
| 64                                                         | 0.139380066  | 0.112367291 | 0.211268002                |             |             |        |
| 0.382653403                                                | 0.274731722  | 0.400754458 |                            |             |             |        |
| ENSG00000163795                                            | 261.4733387  | 486.6493489 | 368.6300029                |             |             |        |
| 622.8384977                                                | 492.5704739  | 476.8707425 | 372.2508968                |             |             |        |
| 530.7599047                                                | -0.509624834 | 0.040078424 | 0.161907532                |             |             | ZNF513 |
| 2                                                          | 27377231     | 27380790    | -                          | 2365        |             |        |
| protein_coding zinc finger protein 513                     |              |             |                            |             |             |        |
| [Source:HGNC Symbol;Acc:HGNC:26498]                        | zf-C2H2      | 226         | 525                        | 377         | 620         | 539    |
| 486                                                        | 5.226031304  | 9.787282327 | 7.384356596                |             |             |        |
| 12.67540256                                                | 9.93153135   | 9.592927451 |                            |             |             |        |
| ENSG00000167548                                            | 2083.687978  | 2612.148315 | 3685.322231                |             |             |        |
| 5927.01151                                                 | 2919.782308  | 5377.061047 | 2793.719508                |             |             |        |
| 4741.284955                                                | -0.76298634  | 0.040087657 | 0.161907532                |             |             | KMT2D  |
| 12                                                         | 49018975     | 49059774    | -                          | 20485       |             |        |
| protein_coding lysine methyltransferase 2D                 |              |             |                            |             |             |        |
| [Source:HGNC Symbol;Acc:HGNC:7133]                         | -            | 1801        | 2818                       | 3769        | 5900        | 3195   |
| 5480                                                       | 4.808088548  | 6.065114142 | 8.523002679                |             |             |        |
| 13.92570721                                                | 6.796627869  | 12.4879349  |                            |             |             |        |
| ENSG00000250651                                            | 1.156961676  | 4.634755704 | 1.955596832                |             |             |        |
| 20.09156444                                                | 21.93263706  | 4.906077597 | 2.582438071                |             |             |        |
| 15.64342637                                                | -2.580028548 | 0.040090874 | 1                          | PABPC1P7    |             |        |
| 4                                                          | 102896725    | 102898237   | +                          | 1513        |             |        |
| processed_pseudogene poly(A) binding protein cytoplasmic 1 |              |             |                            |             |             |        |
| pseudogene 7                                               |              |             |                            |             |             |        |
| [Source:HGNC Symbol;Acc:HGNC:37987]                        | -            |             |                            |             |             | 1      |
| 5                                                          | 2            | 20          | 24                         | 5           | 0.036145629 |        |

|                        |                                                               |                                           |             |             |             |
|------------------------|---------------------------------------------------------------|-------------------------------------------|-------------|-------------|-------------|
| 0.145701839            | 0.061234126                                                   | 0.639134534                               | 0.691243263 |             |             |
| 0.154268449            |                                                               |                                           |             |             |             |
| ENSG00000249348        | 67.10377719                                                   | 53.76316617                               | 60.6235018  |             |             |
| 167.7645631            | 78.59194946                                                   | 89.29061227                               | 60.49681505 |             |             |
| 111.8823749            | -0.887446244                                                  | 0.040123341                               | 0.162008851 | UGDH-       |             |
| AS1                    | 4                                                             | 39528019                                  | 39594707    | +           | 2787        |
| antisense              | UGDH antisense RNA 1 [Source:HGNC                             |                                           |             |             |             |
| Symbol;Acc:HGNC:40601] | -                                                             | 58                                        | 58          | 62          | 167         |
| 91                     | 1.138113926                                                   | 0.91753995                                | 1.030521784 |             | 86          |
| 2.897214959            | 1.344683514                                                   | 1.524229839                               |             |             |             |
| ENSG00000158669        | 2324.336007                                                   | 2220.047982                               | 2486.541372 |             |             |
| 3092.091767            | 2663.901543                                                   | 2744.459808                               | 2343.641787 |             |             |
| 2833.484373            | -0.273762883                                                  | 0.040187485                               | 0.162225001 | GPAT4       |             |
| 8                      | 41577187                                                      | 41625001                                  | +           | 7939        |             |
| protein_coding         | glycerol-3-phosphate acyltransferase 4 [Source:HGNC           |                                           |             |             |             |
| Symbol;Acc:HGNC:20880] | -                                                             | 2009                                      | 2395        | 2543        | 3078        |
| 2797                   | 13.83913187                                                   | 13.30067476                               | 14.83826128 |             | 2915        |
| 18.74580219            | 16.00041897                                                   | 16.44647012                               |             |             |             |
| ENSG00000197721        | 5.784808379                                                   | 0                                         | 14.66697624 | 0           | 0           |
| 0                      | 6.81726154                                                    | 0                                         | 5.261641015 | 0.040188424 |             |
| 1                      | CR1L                                                          | 1                                         | 207645113   | 207738416   | +           |
| 2768                   | protein_coding complement C3b/C4b receptor 1 like             |                                           |             |             |             |
| [Source:HGNC           | Symbol;Acc:HGNC:2335]                                         | -                                         | 5           | 0           | 15          |
| 0                      | 0                                                             | 0                                         | 0.098786735 | 0           | 0.251031158 |
| 0                      | 0                                                             | 0                                         |             |             |             |
| ENSG00000270926        | 5.784808379                                                   | 0                                         | 14.66697624 | 0           | 0           |
| 0                      | 6.81726154                                                    | 0                                         | 5.261641015 | 0.040188424 |             |
| 1                      | AC008013.3                                                    | 12                                        | 31105105    | 31106830    |             |
| -                      | 675                                                           | unprocessed_pseudogene WAS protein family |             |             |             |
| homolog                | 4                                                             | pseudogene                                | -           | 5           | 0           |
| 0                      | 0.405098788                                                   | 0                                         | 1.029413696 | 0           | 0           |
| 0                      |                                                               |                                           |             |             |             |
| ENSG00000246089        | 106.4404742                                                   | 138.11572                                 | 147.6475608 |             |             |
| 55.25180221            | 47.52071363                                                   | 112.8397847                               | 130.734585  |             |             |
| 71.87076686            | 0.865115186                                                   | 0.040224374                               | 0.162331045 |             |             |
| AC016065.1             | 8                                                             | 6403551                                   | 6407142     | -           | 2934        |
|                        | uncharacterized LOC100287015 [Source:NCBI gene;Acc:100287015] |                                           |             |             |             |
| -                      | 92                                                            | 149                                       | 151         | 55          | 52          |
|                        |                                                               |                                           |             |             | 115         |
| 1.714835362            | 2.239031053                                                   | 2.384071596                               | 0.906366398 |             |             |
| 0.772328092            | 1.829716341                                                   |                                           |             |             |             |
| ENSG00000235436        | 0                                                             | 7.415609127                               | 12.71137941 | 0           | 0           |
| 0                      | 6.708996179                                                   | 0                                         | 5.242462726 | 0.040251384 |             |
| 1                      | DPY19L2P4                                                     | 7                                         | 90119400    | 90125600    |             |
| +                      | 2018                                                          | transcribed_unprocessed_pseudogene        |             |             |             |
| DPY19L2                | pseudogene 4 [Source:HGNC Symbol;Acc:HGNC:22176]              |                                           |             |             |             |
| 0                      | 8                                                             | 13                                        | 0           | 0           | 0           |
| 0.174784446            | 0.298417746                                                   | 0                                         | 0           | 0           |             |
| ENSG00000232973        | 0                                                             | 6.488657986                               | 13.68917783 | 0           | 0           |
| 0                      | 6.725945271                                                   | 0                                         | 5.245953183 | 0.040268504 |             |
| 1                      | CYP1B1-AS1                                                    | 2                                         | 38073447    | 38231651    |             |

|                        |                                                   |                        |             |                        |             |             |             |
|------------------------|---------------------------------------------------|------------------------|-------------|------------------------|-------------|-------------|-------------|
|                        | +                                                 | 7447                   | antisense   | CYP1B1 antisense RNA 1 |             |             |             |
| [Source:HGNC           | Symbol;Acc:HGNC:28543]                            | -                      | 0           | 7                      | 14          |             |             |
|                        | 0                                                 | 0                      | 0           | 0                      | 0.041442948 | 0.087086159 |             |
|                        | 0                                                 | 0                      | 0           |                        |             |             |             |
| ENSG00000107672        | 971.8478076                                       | 953.8327239            | 784.1943298 |                        |             |             |             |
| 689.1406603            | 808.7659915                                       | 574.0110789            | 903.2916204 |                        |             |             |             |
| 690.6392436            | 0.386722923                                       | 0.040287406            | 0.162535193 |                        |             |             |             |
| NSMCE4A 10             | 121957088                                         | 121975217              | -           | 3546                   |             |             |             |
| protein_coding         | "NSE4 homolog A, SMC5-SMC6 complex component      |                        |             |                        |             |             |             |
| [Source:HGNC           | Symbol;Acc:HGNC:25935]"                           | -                      | 840         | 1029                   | 802         |             |             |
|                        | 686                                               | 885                    | 585         | 12.95493587            | 12.79412535 |             |             |
| 10.47702772            | 9.35376815                                        | 10.8758482             | 7.701284559 |                        |             |             |             |
| ENSG00000145916        | 503.2783289                                       | 499.6266649            | 464.4542477 |                        |             |             |             |
| 594.7103074            | 553.7990857                                       | 814.4088812            | 489.1197472 |                        |             |             |             |
| 654.3060914            | -0.419706005                                      | 0.040296224            | 0.162535193 |                        |             |             | RMND5B      |
|                        | 5                                                 | 178130996              | 178150565   | +                      | 7701        |             |             |
| protein_coding         | required for meiotic nuclear division 5 homolog B |                        |             |                        |             |             |             |
| [Source:HGNC           | Symbol;Acc:HGNC:26181]                            | -                      | 435         | 539                    | 475         |             |             |
|                        | 592                                               | 606                    | 830         | 3.089134703            | 3.0858556   |             |             |
| 2.85725461             | 3.716856548                                       | 3.429131175            | 5.031262826 |                        |             |             |             |
| ENSG00000204301        | 13.88354011                                       | 32.44328993            | 44.00092873 |                        |             |             |             |
| 3.013734666            | 17.36333767                                       | 2.943646558            | 30.10925292 |                        |             |             |             |
| 7.773572965            | 1.947555708                                       | 0.040334623            | 0.162647159 |                        |             |             | NOTCH4      |
|                        | 6                                                 | 32194843               | 32224067    | -                      | 9748        |             |             |
| protein_coding         | notch 4 [Source:HGNC                              | Symbol;Acc:HGNC:7884]  |             |                        |             |             | -           |
|                        | 12                                                | 35                     | 45          | 3                      | 19          | 3           | 0.067322532 |
|                        | 0.158302029                                       | 0.213845172            | 0.014880138 | 0.084936953            |             |             |             |
|                        | 0.014366526                                       |                        |             |                        |             |             |             |
| ENSG00000104957        | 661.7820785                                       | 794.3971277            | 690.3256818 |                        |             |             |             |
| 742.3833061            | 1031.747802                                       | 1030.276295            | 715.5016293 |                        |             |             |             |
| 934.8024677            | -0.385448607                                      | 0.040360707            | 0.162647545 |                        |             |             |             |
| CCDC130 19             | 13731760                                          | 13763296               | +           | 3307                   |             |             |             |
| protein_coding         | coiled-coil domain containing 130 [Source:HGNC    |                        |             |                        |             |             |             |
| Symbol;Acc:HGNC:28118] | -                                                 | 572                    | 857         | 706                    | 739         | 1129        |             |
|                        | 1050                                              | 9.45924658             | 11.42564128 | 9.889468738            |             |             |             |
| 10.80466883            | 14.87710214                                       | 14.82180653            |             |                        |             |             |             |
| ENSG00000178741        | 1089.857899                                       | 1543.37365             | 1542.965901 |                        |             |             |             |
| 1069.875806            | 997.9349861                                       | 1183.345916            | 1392.065816 |                        |             |             |             |
| 1083.718903            | 0.362019123                                       | 0.040371132            | 0.162647545 |                        |             |             | COX5A       |
|                        | 15                                                | 74919791               | 74938168    | -                      | 1411        |             |             |
| protein_coding         | cytochrome c oxidase subunit 5A [Source:HGNC      |                        |             |                        |             |             |             |
| Symbol;Acc:HGNC:2267]  | -                                                 | 942                    | 1665        | 1578                   | 1065        | 1092        |             |
|                        | 1206                                              | 36.51056904            | 52.0260893  | 51.80628387            |             |             |             |
| 36.49419687            | 33.72517581                                       | 39.89939678            |             |                        |             |             |             |
| ENSG00000087152        | 1571.153956                                       | 1810.335578            | 1976.130599 |                        |             |             |             |
| 2232.172809            | 2067.151043                                       | 2275.43879             | 1785.873378 |                        |             |             |             |
| 2191.587547            | -0.294885356                                      | 0.040377727            | 0.162647545 |                        |             |             |             |
| ATXN7L3 17             | 44191805                                          | 44200113               | -           | 5301                   |             |             |             |
| protein_coding         | ataxin 7 like 3 [Source:HGNC                      | Symbol;Acc:HGNC:25416] |             |                        |             |             |             |
|                        | -                                                 | 1358                   | 1953        | 2021                   | 2222        | 2262        | 2319        |

|                         |                                                       |                        |                      |                |             |
|-------------------------|-------------------------------------------------------|------------------------|----------------------|----------------|-------------|
| 14.009953               | 16.24345453                                           | 17.6608241             | 20.26690664          |                |             |
| 18.5948806              | 20.42156308                                           |                        |                      |                |             |
| ENSG00000096060         | 688.3921971                                           | 592.321779             | 798.861306           |                |             |
| 569.5958519             | 312.5400781                                           | 587.7480962            | 693.1917607          |                |             |
| 489.961342              | 0.501125682                                           | 0.040379287            | 0.162647545          | FKBP5          |             |
| 6                       | 35573585                                              | 35728583               | -                    | 10628          |             |
| protein_coding          | FK506 binding protein 5 [Source:HGNC                  |                        |                      |                |             |
| Symbol;Acc:HGNC:3721]   | -                                                     | 595                    | 639                  | 817            | 567         |
| 599                     | 3.061682365                                           | 2.650838505            | 3.561008141          |                | 342         |
| 2.579483354             | 1.402274892                                           | 2.631002813            |                      |                |             |
| ENSG00000170442         | 1.156961676                                           | 38.00499677            | 36.1785414           |                |             |
| 8.036625776             | 4.569299387                                           | 0                      | 25.11349995          | 4.201975054    |             |
| 2.584286444             | 0.040387917                                           | 0.162647545            | KRT86                | 12             |             |
| 52249300                | 52309163                                              | +                      | 2394                 | protein_coding |             |
| keratin 86 [Source:HGNC | Symbol;Acc:HGNC:6463]                                 | -                      |                      | 1              |             |
| 41                      | 37                                                    | 8                      | 5                    | 0              | 0.022843917 |
| 0.75508122              | 0.715945616                                           | 0.161572356            | 0.091013215          |                | 0           |
| ENSG00000160193         | 835.3263299                                           | 1063.212959            | 1055.044491          |                |             |
| 1516.913115             | 1138.669407                                           | 1153.909451            | 984.5279265          |                |             |
| 1269.830658             | -0.36628564                                           | 0.04041185             | 0.162701068          | WDR4           |             |
| 21                      | 42843094                                              | 42879568               | -                    | 2738           |             |
| protein_coding          | WD repeat domain 4 [Source:HGNC                       | Symbol;Acc:HGNC:12756] |                      |                |             |
| -                       | 722                                                   | 1147                   | 1079                 | 1510           | 1246        |
| 14.42110259             | 18.46987397                                           | 18.25536231            | 26.6651923           |                |             |
| 19.83093524             | 20.05025562                                           |                        |                      |                |             |
| ENSG00000115677         | 12371.3912                                            | 11534.98               | 13330.32581          |                |             |
| 10716.84047             | 10049.71707                                           | 10764.91546            | 12412.23233          |                |             |
| 10510.491               | 0.239936433                                           | 0.040456845            | 0.162839332          | HDLBP          |             |
| 2                       | 241227264                                             | 241317061              | -                    | 12182          |             |
| protein_coding          | high density lipoprotein binding protein [Source:HGNC |                        |                      |                |             |
| Symbol;Acc:HGNC:4857]   | -                                                     | 10693                  | 12444                | 13633          | 10668       |
| 10971                   | 48.00380738                                           | 45.03761305            | 51.84122978          |                |             |
| 42.34144043             | 39.33817678                                           | 42.04105982            |                      |                |             |
| ENSG00000273415         | 27.76708022                                           | 36.15109449            | 14.66697624          |                |             |
| 41.1877071              | 71.28107044                                           | 66.72265532            | 26.19505032          |                |             |
| 59.73047762             | -1.189220329                                          | 0.040515146            | 0.163031072          |                |             |
| AP000904.1              | 11                                                    | 128096042              | 128183554            | +              | 1959        |
| lincRNA                 | novel transcript                                      | -                      | 24                   | 39             | 15          |
| 41                      | 78                                                    | 68                     | 0.669994933          | 0.87773644     |             |
| 0.35469844              | 1.011930387                                           | 1.735077046            | 1.620393575          |                |             |
| ENSG00000213590         | 9.255693406                                           | 7.415609127            | 0.977798416          |                | 0           |
| 0                       | 0                                                     | 5.88303365             | 0                    | 5.047356128    |             |
| 0.040518326             | 1                                                     | AL807752.1             | 9                    | 136935840      |             |
| 136937161               | +                                                     | 1322                   | processed_pseudogene | ribosomal      |             |
| protein L30 (RPL30)     | pseudogene                                            | -                      | 8                    | 8              | 1           |
| 0                       | 0                                                     | 0.330943034            | 0.266804094          | 0.035040557    | 0           |
| 0                       | 0                                                     | 0                      |                      |                |             |
| ENSG00000152409         | 566.9112211                                           | 530.2160526            | 564.1896861          |                |             |
| 985.4912358             | 598.5782197                                           | 665.2641222            | 553.7723199          |                |             |
| 749.7778592             | -0.436925702                                          | 0.040534474            | 0.163065924          | JMY            |             |

|                                    |                                                                                               |                                                         |              |             |             |
|------------------------------------|-----------------------------------------------------------------------------------------------|---------------------------------------------------------|--------------|-------------|-------------|
| 5                                  | 79236189                                                                                      | 79327215                                                | +            | 9042        |             |
| protein_coding                     | "junction mediating and regulatory protein, p53 cofactor [Source:HGNC Symbol;Acc:HGNC:28916]" |                                                         |              |             |             |
|                                    |                                                                                               |                                                         | -            | 490         | 572         |
|                                    | 577                                                                                           | 981                                                     | 655          | 678         | 2.963645748 |
|                                    | 2.956063549                                                                                   | 5.245727435                                             | 3.156715153  | 3.500348028 |             |
| ENSG00000198829                    | 0                                                                                             | 0                                                       | 0            | 12.79403828 |             |
| 7.849724156                        | 0                                                                                             | 6.881254147                                             | -5.204008151 | 0.040563974 |             |
| 1                                  | SUCNR1                                                                                        | 3                                                       | 151873643    | 151884619   | +           |
| 4181                               | protein_coding                                                                                | succinate receptor 1 [Source:HGNC Symbol;Acc:HGNC:4542] |              |             |             |
|                                    |                                                                                               | -                                                       | 0            | 0           | 0           |
|                                    | 8                                                                                             | 0                                                       | 0            | 0           | 0.145917193 |
| 0.089321469                        |                                                                                               |                                                         |              |             |             |
| ENSG00000241494                    | 384.1112763                                                                                   | 431.9592316                                             | 478.1434255  |             |             |
| 509.3211586                        | 766.7284372                                                                                   | 502.382346                                              | 431.4046445  |             |             |
| 592.8106472                        | -0.458455069                                                                                  | 0.040578041                                             | 0.163198239  |             |             |
| AL355032.1                         | 14                                                                                            | 101677943                                               | 101678380    | +           | 438         |
| processed_pseudogene               | ribosomal protein L26-like 1 (RPL26L1)                                                        |                                                         |              |             |             |
| pseudogene                         | -                                                                                             | 332                                                     | 466          | 489         | 507         |
|                                    | 41.45325958                                                                                   | 46.90787554                                             | 51.71746205  | 55.96739141 |             |
|                                    | 83.47308185                                                                                   | 54.56848372                                             |              |             |             |
| ENSG00000133858                    | 1219.437606                                                                                   | 865.7723656                                             | 1067.75587   |             |             |
| 781.5618567                        | 939.447954                                                                                    | 683.9072171                                             | 1050.988614  |             |             |
| 801.6390093                        | 0.389781112                                                                                   | 0.040600105                                             | 0.163225852  |             | ZFC3H1      |
|                                    | 12                                                                                            | 71609472                                                | 71667725     | -           | 9670        |
| protein_coding                     | zinc finger C3H1-type containing [Source:HGNC Symbol;Acc:HGNC:28328]                          |                                                         |              |             |             |
|                                    |                                                                                               | -                                                       | 1054         | 934         | 1092        |
|                                    | 697                                                                                           | 5.960859007                                             | 4.258477531  | 5.231167426 | 778         |
| 3.890042439                        | 4.632604645                                                                                   | 3.364746421                                             |              |             | 1028        |
| ENSG00000130669                    | 1159.275599                                                                                   | 2584.339781                                             | 2430.806863  |             |             |
| 2692.269635                        | 2802.808244                                                                                   | 2994.669765                                             | 2058.140747  |             |             |
| 2829.915881                        | -0.458833053                                                                                  | 0.040606261                                             | 0.163225852  |             | PAK4        |
|                                    | 19                                                                                            | 39125770                                                | 39182816     | +           | 7115        |
| protein_coding                     | p21 (RAC1) activated kinase 4 [Source:HGNC Symbol;Acc:HGNC:16059]                             |                                                         |              |             |             |
|                                    |                                                                                               | -                                                       | 1002         | 2788        | 2486        |
|                                    | 3052                                                                                          | 7.701716529                                             | 17.2763432   | 16.18559524 | 2680        |
| 18.21214528                        | 18.78440613                                                                                   | 20.02422243                                             |              |             | 3067        |
| ENSG00000139438                    | 54.37719876                                                                                   | 54.69011731                                             | 121.2470036  |             |             |
| 149.6821551                        | 124.2849433                                                                                   | 138.3513882                                             | 76.77143989  |             |             |
| 137.4394956                        | -0.838038771                                                                                  | 0.040642441                                             | 0.163328339  |             |             |
| FAM222A                            | 12                                                                                            | 109714228                                               | 109770507    | +           | 3722        |
| protein_coding                     | family with sequence similarity 222 member A [Source:HGNC Symbol;Acc:HGNC:25915]              |                                                         |              |             |             |
|                                    |                                                                                               | -                                                       | 47           | 59          | 124         |
|                                    | 149                                                                                           | 136                                                     | 141          | 0.690583507 | 0.698891246 |
| 1.543290818                        | 1.935579956                                                                                   | 1.592286222                                             | 1.768433689  |             |             |
| ENSG00000224273                    | 5.784808379                                                                                   | 6.488657986                                             | 0            | 27.12361199 |             |
|                                    | 5.483159264                                                                                   | 33.36132766                                             | 4.091155455  | 21.98936631 |             |
|                                    | -2.429307626                                                                                  | 0.040678533                                             | 0.163430417  | AC005077.2  |             |
|                                    | 7                                                                                             | 76108434                                                | 76132187     | -           | 690         |
| transcribed_unprocessed_pseudogene | pseudogene similar to part of RAB guanine nucleotide exchange factor (GEF) 1 RABGEF1          |                                                         |              |             |             |
|                                    |                                                                                               | -                                                       |              |             | 5           |

|                 |                                                                                |             |                          |             |                |             |             |  |
|-----------------|--------------------------------------------------------------------------------|-------------|--------------------------|-------------|----------------|-------------|-------------|--|
| 0.447283531     | 7                                                                              | 0           | 27                       | 6           | 34             | 0.396292293 |             |  |
| ENSG0000011422  | 4607.021393                                                                    |             | 1.891977163              | 4936.014825 | 0.378931542    | 2.300254358 |             |  |
| 4662.247528     | 5957.452541                                                                    |             | 5750.90416               | 4386.63752  |                |             |             |  |
| 5456.868076     | -0.315024053                                                                   |             | 0.040713675              | 0.163522616 |                |             | PLAUR       |  |
| 19              | 43646095                                                                       |             | 43670547                 | -           | 4457           |             |             |  |
| protein_coding  | "plasminogen activator, urokinase receptor [Source:HGNC Symbol;Acc:HGNC:9053]" |             |                          |             |                |             |             |  |
| 4641            | 6519                                                                           | 5861        | 48.85998557              | 52.67577525 | 3982           | 5325        | 3699        |  |
| 38.44537957     | 50.34660042                                                                    |             | 63.73778174              | 61.38681813 |                |             |             |  |
| ENSG00000180481 | 12.72657843                                                                    |             | 14.83121825              | 1.955596832 |                |             |             |  |
| 59.2701151      | 30.15737595                                                                    |             | 14.71823279              | 9.83779784  |                |             |             |  |
| 34.71524128     | -1.820546199                                                                   |             | 0.04072722               | 0.163522616 |                |             |             |  |
| GLIPR1L2        | 12                                                                             | 75391070    | 75432688                 | +           |                |             | 3790        |  |
| protein_coding  | GLIPR1 like 2 [Source:HGNC Symbol;Acc:HGNC:28592]                              |             |                          |             |                |             |             |  |
| 15              | 0.158726042                                                                    |             | 0.186129294              | 0.02444518  | 2              | 59          | 33          |  |
| 0.752686312     | 0.379431452                                                                    |             | 0.184755802              |             |                |             |             |  |
| ENSG00000279412 | 23.13923351                                                                    |             | 47.27450818              | 31.28954932 |                |             |             |  |
| 96.43950931     | 45.69299387                                                                    |             | 75.553595                | 33.901097   |                |             |             |  |
| 72.56203273     | -1.091720954                                                                   |             | 0.040742908              | 0.163522616 |                |             |             |  |
| AC020763.3      | 16                                                                             | 70713987    | 70716890                 | +           |                |             | 2904        |  |
| TEC             | novel transcript                                                               |             |                          |             |                |             |             |  |
| 96              | 50                                                                             | 77          | 0.376641435              | 0.774296903 | 20             | 51          | 32          |  |
| 0.510453072     | 1.598364545                                                                    |             | 0.750294892              | 1.23777056  |                |             |             |  |
| ENSG00000178440 | 2.313923351                                                                    |             | 0.926951141              | 10.75578258 |                |             |             |  |
| 35.16023777     | 9.138598774                                                                    |             | 23.54917247              | 4.665552357 |                |             |             |  |
| 22.616003       | -2.270920498                                                                   |             | 0.040744269              | 0.163522616 |                |             |             |  |
| LINC00843       | 10                                                                             | 49972763    | 49982053                 | +           |                |             | 711         |  |
| lincRNA         | long intergenic non-protein coding RNA 843 [Source:HGNC Symbol;Acc:HGNC:45009] |             |                          |             |                |             |             |  |
| 35              | 10                                                                             | 24          | 0.153834983              | 0.062010375 | 2              | 1           | 11          |  |
| 0.716680421     | 2.380124419                                                                    |             | 0.612899119              | 1.57575131  |                |             |             |  |
| ENSG00000271367 | 3.470885027                                                                    |             | 5.561706845              | 7.822387329 |                |             | 0           |  |
| 0               | 0                                                                              | 5.618326401 | 0                        | 4.984755262 |                |             |             |  |
| 0.040811665     | 1                                                                              | AL034374.1  | 6                        | 53350158    |                |             |             |  |
| 53350705        | +                                                                              | 548         | lincRNA novel transcript | -           |                |             |             |  |
| 3               | 6                                                                              | 8           | 0                        | 0           | 0              | 0.299388703 |             |  |
| 0.4827304       |                                                                                | 0.676257172 | 0                        | 0           | 0              |             |             |  |
| ENSG00000198517 | 404.9365865                                                                    |             | 814.7900528              | 908.3747286 |                |             |             |  |
| 988.5049705     | 916.601457                                                                     |             | 1113.679615              | 709.3671226 |                |             |             |  |
| 1006.262014     | -0.50303991                                                                    |             | 0.04089356               | 0.164078703 |                |             | MAFK        |  |
| 7               | 1530714                                                                        | 1543043     | +                        | 4458        | protein_coding |             | MAF         |  |
| bZIP            | transcription factor K [Source:HGNC Symbol;Acc:HGNC:6782]                      |             |                          |             |                |             |             |  |
| TF_bZIP         | 350                                                                            | 879         | 929                      | 984         | 1003           | 1135        | 4.29361098  |  |
|                 | 8.693262004                                                                    |             | 9.653351179              | 10.6722564  |                |             | 9.804364903 |  |
|                 | 11.88507244                                                                    |             |                          |             |                |             |             |  |
| ENSG00000148219 | 42.807582                                                                      |             | 47.27450818              | 57.69010655 |                |             |             |  |
| 100.4578222     | 81.33352909                                                                    |             | 88.30939675              | 49.25739891 |                |             |             |  |
| 90.03358268     | -0.868210596                                                                   |             | 0.040989822              | 0.164421783 |                |             | ASTN2       |  |

|                                     |                                                        |                |                   |              |          |
|-------------------------------------|--------------------------------------------------------|----------------|-------------------|--------------|----------|
| 9                                   | 116425225                                              | 117415070      | -                 | 8290         |          |
| protein_coding                      | astrotactin 2 [Source:HGNC Symbol;Acc:HGNC:17021]      |                |                   |              |          |
| -                                   | 37                                                     | 51             | 59                | 100          | 89 90    |
| 0.244085458                         | 0.271237419                                            | 0.329685568    | 0.583239174       |              |          |
| 0.46783647                          | 0.506796976                                            |                |                   |              |          |
| ENSG00000117481                     | 1058.619933                                            | 1075.263323    | 936.7308827       |              |          |
| 1402.391198                         | 1156.032745                                            | 1275.580175    | 1023.538046       |              |          |
| 1278.001373                         | -0.32023118                                            | 0.04101638     | 0.164485153       |              | NSUN4    |
| 1                                   | 46340177                                               | 46365152       | +                 | 8468         |          |
| protein_coding                      | NOP2/Sun RNA methyltransferase family member 4         |                |                   |              |          |
| [Source:HGNC Symbol;Acc:HGNC:31802] | -                                                      |                | 915               | 1160         | 958      |
| 1396                                | 1265                                                   | 1300           | 5.90928529        | 6.039640627  |          |
| 5.240673645                         | 7.970871089                                            | 6.509809412    | 7.166523656       |              |          |
| ENSG00000182013                     | 244.1189136                                            | 287.3548537    | 288.4505328       |              |          |
| 412.8816493                         | 354.5776324                                            | 357.1624491    | 273.3081          |              |          |
| 374.8739103                         | -0.454610373                                           | 0.041051327    | 0.164582122       |              | PNMA8A   |
| 19                                  | 46466491                                               | 46471563       | -                 | 3696         |          |
| protein_coding                      | PNMA family member 8A [Source:HGNC                     |                |                   |              |          |
| Symbol;Acc:HGNC:25578]              | -                                                      | 211            | 310               | 295          | 411 388  |
| 364                                 | 3.122088471                                            | 3.697972603    | 3.697366562       |              |          |
| 5.37664145                          | 4.574655144                                            | 4.597433509    |                   |              |          |
| ENSG00000108823                     | 3.470885027                                            | 6.488657986    | 6.844588913       |              | 0        |
| 0                                   | 0                                                      | 5.601377309    | 0                 | 4.980609161  |          |
| 0.041070072                         | 1                                                      | SGCA           | 17                | 50164214     | 50175931 |
| +                                   | 2452                                                   | protein_coding | sarcoglycan alpha | [Source:HGNC |          |
| Symbol;Acc:HGNC:10805]              | -                                                      | 3              | 7                 | 7            | 0 0      |
| 0                                   | 0.066910689                                            | 0.125866899    | 0.132245234       |              | 0        |
| 0                                   | 0                                                      |                |                   |              |          |
| ENSG00000105699                     | 6.941770054                                            | 21.31987624    | 25.42275882       |              |          |
| 46.21059821                         | 60.31475191                                            | 34.34254318    | 17.8948017        |              |          |
| 46.95596443                         | -1.38339932                                            | 0.041075394    | 0.164635435       |              | LSR      |
| 19                                  | 35248330                                               | 35267964       | +                 | 2916         |          |
| protein_coding                      | lipolysis stimulated lipoprotein receptor [Source:HGNC |                |                   |              |          |
| Symbol;Acc:HGNC:29572]              | -                                                      | 6              | 23                | 26           | 46 66    |
| 35                                  | 0.112527441                                            | 0.347755714    | 0.413036359       |              |          |
| 0.762731229                         | 0.986313582                                            | 0.560307661    |                   |              |          |
| ENSG00000259015                     | 0                                                      | 6.488657986    | 5.866790497       | 16.07325155  |          |
| 30.15737595                         | 15.69944831                                            | 4.118482828    | 20.64335861       |              |          |
| -2.303452571                        | 0.041095123                                            | 0.164649417    | AL442663.4        |              |          |
| 14                                  | 72960595                                               | 72961993       | +                 | 289          |          |
| processed_pseudogene                | chromosome 17 open reading frame 98 (C17orf98)         |                |                   |              |          |
| pseudogene                          | -                                                      | 0              | 7                 | 6            | 16 33 16 |
| 0                                   | 1.067908775                                            | 0.961735979    | 2.676845813       |              |          |
| 4.975934957                         | 2.584450245                                            |                |                   |              |          |
| ENSG00000168803                     | 411.8783566                                            | 278.0853423    | 311.9176948       |              |          |
| 272.2406982                         | 231.206549                                             | 180.5436556    | 333.9604645       |              |          |
| 227.9969676                         | 0.549402138                                            | 0.041108125    | 0.164649417       |              | ADAL     |
| 15                                  | 43330657                                               | 43354555       | +                 | 5735         |          |
| protein_coding                      | adenosine deaminase like [Source:HGNC                  |                |                   |              |          |
| Symbol;Acc:HGNC:31853]              | -                                                      | 356            | 300               | 319          | 271 253  |

|                                                                                             |                   |             |                |               |
|---------------------------------------------------------------------------------------------|-------------------|-------------|----------------|---------------|
| 184                                                                                         | 3.394777292       | 2.306331818 | 2.576675432    |               |
| 2.284741578                                                                                 | 1.922408582       | 1.497719336 |                |               |
| ENSG00000132405                                                                             | 440.8023984       | 633.1076292 | 627.7465832    |               |
| 735.3512585                                                                                 | 751.1928192       | 756.5171655 | 567.2188703    |               |
| 747.6870811                                                                                 | -0.397140705      | 0.041111194 | 0.164649417    |               |
| TBC1D14 4                                                                                   | 6909242 7033118 + | 6241        | protein_coding | TBC1          |
| domain family member 14 [Source:HGNC Symbol;Acc:HGNC:29246]                                 |                   |             |                | -             |
| 381                                                                                         | 683               | 642         | 732            | 822           |
| 4.825035123                                                                                 | 4.76522379        | 5.670979991 | 5.739528711    |               |
| 5.766950601                                                                                 |                   |             |                |               |
| ENSG00000168906                                                                             | 6364.446178       | 6217.061302 | 5697.631371    |               |
| 6907.479855                                                                                 | 7431.508523       | 7247.257827 | 6093.046284    |               |
| 7195.415402                                                                                 | -0.239990332      | 0.041215381 | 0.16498304     | MAT2A         |
| 2                                                                                           | 85539165          | 85545280    | + 4487         |               |
| protein_coding methionine adenosyltransferase 2A [Source:HGNC Symbol;Acc:HGNC:6904]         | -                 | 5501 6707   | 5827 6876      | 8132          |
| 7386                                                                                        | 67.0471448        | 65.90315327 | 60.15772504    |               |
| 74.09365434                                                                                 | 78.97686642       | 76.84210788 |                |               |
| ENSG00000160877                                                                             | 1677.59443        | 2554.677344 | 3227.712572    |               |
| 3216.659467                                                                                 | 3144.591838       | 3452.897413 | 2486.661449    |               |
| 3271.382906                                                                                 | -0.395253066      | 0.041216081 | 0.16498304     | NACC1         |
| 19                                                                                          | 13118103          | 13141141    | + 4474         |               |
| protein_coding nucleus accumbens associated 1 [Source:HGNC Symbol;Acc:HGNC:20967]           | -                 | 1450 2756   | 3301 3202      | 3441          |
| 3519                                                                                        | 17.72420381       | 27.15921365 | 34.17842142    |               |
| 34.60402079                                                                                 | 33.51562254       | 36.71718037 |                |               |
| ENSG00000206989                                                                             | 2.313923351       | 0 0         | 25.11445555    |               |
| 2.741579632                                                                                 | 3.924862078       | 0.771307784 |                |               |
| 10.59363242                                                                                 | -3.861455928      | 0.041223429 | 1              | SNORD63 5     |
| 138561043                                                                                   | 138561110         | -           | 68             | snoRNA "small |
| nucleolar RNA, C/D box 63 [Source:HGNC Symbol;Acc:HGNC:10220]"                              |                   |             |                | -             |
| 2                                                                                           | 0                 | 0           | 25             | 3             |
| 0                                                                                           | 0                 | 17.77592923 | 1.922520324    | 2.745978386   |
| ENSG00000241837                                                                             | 500.9644056       | 468.1103261 | 633.6133737    |               |
| 260.1857595                                                                                 | 412.1508047       | 459.2088631 | 534.2293685    |               |
| 377.1818091                                                                                 | 0.501906977       | 0.041237069 | 0.165020503    | ATP5P0        |
| 21                                                                                          | 33903453          | 33915980    | - 3336         |               |
| protein_coding ATP synthase peripheral stalk subunit OSCP [Source:HGNC Symbol;Acc:HGNC:850] |                   | -           | 433 505        | 648           |
| 259                                                                                         | 451               | 468         | 7.098336233    | 6.674201191   |
| 8.998112521                                                                                 | 3.75383292        | 5.891272313 | 6.548862121    |               |
| ENSG00000134452                                                                             | 1103.741439       | 1174.447095 | 1019.843748    |               |
| 1424.491919                                                                                 | 1324.182962       | 1315.810012 | 1099.344094    |               |
| 1354.828298                                                                                 | -0.301328004      | 0.04124703  | 0.165020503    | FBH1          |
| 10                                                                                          | 5890203 5937594 + | 6676        | protein_coding | F-box         |
| DNA helicase 1 [Source:HGNC Symbol;Acc:HGNC:13620]                                          |                   |             |                | 954           |
| 1267                                                                                        | 1043              | 1418        | 1449           | 1341          |
| 8.367471559                                                                                 | 7.237197695       | 10.26977951 | 9.458247084    |               |
| 9.376882753                                                                                 |                   |             |                |               |
| ENSG00000257167                                                                             | 39.33669697       | 152.0199871 | 158.4033434    |               |



|                                                             |                                               |                       |             |        |
|-------------------------------------------------------------|-----------------------------------------------|-----------------------|-------------|--------|
| 69.31589732                                                 | 26.50193645                                   | 66.72265532           | 116.5866758 |        |
| 54.18016303                                                 | 1.10987749                                    | 0.041290572           | 0.165151484 | TMPO-  |
| AS1 12                                                      | 98512973                                      | 98516422              | - 3357      |        |
| antisense                                                   | TMPO antisense RNA 1 [Source:HGNC             |                       |             |        |
| Symbol;Acc:HGNC:44158]                                      | -                                             | 34 164                | 162 69      | 29     |
| 68                                                          | 0.553888424                                   | 2.153904605           | 2.235456015 |        |
| 0.99379994                                                  | 0.376448226                                   | 0.945591604           |             |        |
| ENSG0000066926                                              | 698.8048521                                   | 627.5459224           | 855.5736141 |        |
| 514.3440497                                                 | 674.4285895                                   | 403.2795785           | 727.3081295 |        |
| 530.6840726                                                 | 0.454234009                                   | 0.041324925           | 0.165214599 | FECH   |
| 18                                                          | 57548283                                      | 57586772              | - 4473      |        |
| protein_coding                                              | ferrochelatase [Source:HGNC                   | Symbol;Acc:HGNC:3647] |             |        |
| -                                                           | 604 677                                       | 875 512               | 738 411     |        |
| 7.384698235                                                 | 6.673040005                                   | 9.06174028            | 5.534422105 |        |
| 7.189787612                                                 | 4.289325057                                   |                       |             |        |
| ENSG00000189171                                             | 408.4074715                                   | 333.7024107           | 488.8992081 |        |
| 249.1353991                                                 | 284.2104219                                   | 342.4442163           | 410.3363634 |        |
| 291.9300124                                                 | 0.490872843                                   | 0.041327967           | 0.165214599 |        |
| S100A13 1                                                   | 153618787                                     | 153631360             | - 2216      |        |
| protein_coding                                              | S100 calcium binding protein A13 [Source:HGNC |                       |             |        |
| Symbol;Acc:HGNC:10490]                                      | -                                             | 353 360               | 500 248     | 311    |
| 349                                                         | 8.71163482                                    | 7.162534101           | 10.45207949 |        |
| 5.411069864                                                 | 6.115743054                                   | 7.351935813           |             |        |
| ENSG00000165804                                             | 267.2581471                                   | 511.6770297           | 425.342311  |        |
| 482.1975466                                                 | 595.8366401                                   | 633.8652256           | 401.4258293 |        |
| 570.6331374                                                 | -0.505587322                                  | 0.041369322           | 0.165336685 | ZNF219 |
| 14                                                          | 21090046                                      | 21104722              | - 6679      |        |
| protein_coding                                              | zinc finger protein 219 [Source:HGNC          |                       |             |        |
| Symbol;Acc:HGNC:13011]                                      | zf-C2H2                                       | 231 552               | 435 480     | 652    |
| 646                                                         | 1.891451672                                   | 3.643859241           | 3.017034451 |        |
| 3.474809582                                                 | 4.253973205                                   | 4.515097265           |             |        |
| ENSG00000114062                                             | 2414.579017                                   | 2117.156406           | 2004.486753 |        |
| 2911.267687                                                 | 2747.976651                                   | 2360.80454            | 2178.740725 |        |
| 2673.349626                                                 | -0.295454152                                  | 0.041385705           | 0.165358932 | UBE3A  |
| 15                                                          | 25333728                                      | 25439056              | - 12813     |        |
| protein_coding                                              | ubiquitin protein ligase E3A [Source:HGNC     |                       |             |        |
| Symbol;Acc:HGNC:12496]                                      | -                                             | 2087 2284             | 2050 2898   | 3007   |
| 2406                                                        | 8.907715456                                   | 7.859216117           | 7.411489381 |        |
| 10.93575499                                                 | 10.22683384                                   | 8.765785369           |             |        |
| ENSG00000137275                                             | 1810.645022                                   | 1745.448998           | 1677.902082 |        |
| 1949.886329                                                 | 2494.837465                                   | 2007.566953           | 1744.665368 |        |
| 2150.763582                                                 | -0.302199422                                  | 0.041405009           | 0.165392832 | RIPK1  |
| 6                                                           | 3063991 3115187 +                             | 4231                  |             |        |
| receptor interacting serine/threonine kinase 1 [Source:HGNC |                                               |                       |             |        |
| Symbol;Acc:HGNC:10019]                                      | -                                             | 1565 1883             | 1716 1941   | 2730   |
| 2046                                                        | 20.22860943                                   | 19.62190879           | 18.78783399 |        |
| 22.18113303                                                 | 28.11759813                                   | 22.57400619           |             |        |
| ENSG00000214485                                             | 5953.724783                                   | 3240.621188           | 3491.718144 |        |
| 2931.359252                                                 | 3637.162312                                   | 2979.951533           | 4228.688039 |        |
| 3182.824366                                                 | 0.409510048                                   | 0.041436439           | 0.165475141 | RPL7P1 |

|                                         |                                               |              |                      |              |       |                |
|-----------------------------------------|-----------------------------------------------|--------------|----------------------|--------------|-------|----------------|
| 5                                       | 150094302                                     | 150095048    | +                    | 747          |       |                |
| processed_pseudogene                    | ribosomal                                     | protein L7   | pseudogene 1         | [Source:HGNC |       |                |
| Symbol;Acc:HGNC:10367]                  | -                                             | 5146         | 3496                 | 3571         | 2918  | 3980           |
| 3037                                    | 376.7418732                                   | 206.3406433  |                      | 221.4479704  |       |                |
| 188.8712707                             | 232.1780012                                   | 189.7886453  |                      |              |       |                |
| ENSG00000182544                         | 392.2100081                                   | 518.1656877  |                      | 483.0324176  |       |                |
| 608.7744025                             | 541.9189073                                   | 706.475174   |                      | 464.4693711  |       |                |
| 619.0561613                             | -0.413111461                                  | 0.041469861  |                      | 0.165546598  |       | MFSD5          |
| 12                                      | 53251251                                      | 53254405     | +                    | 2581         |       |                |
| protein_coding                          | major facilitator                             | superfamily  | domain               | containing   | 5     |                |
| [Source:HGNC                            | Symbol;Acc:HGNC:28156]                        | -            | 339                  | 559          | 494   |                |
| 606                                     | 593                                           | 720          | 7.183008931          | 9.548997097  |       |                |
| 8.866279139                             | 11.35235167                                   | 10.01210249  |                      | 13.0223849   |       |                |
| ENSG00000153707                         | 102.9695891                                   | 67.66743328  |                      | 135.9139798  |       |                |
| 63.28842799                             | 37.46825497                                   | 61.81657773  |                      | 102.1836674  |       |                |
| 54.1910869                              | 0.915888099                                   | 0.041475991  |                      | 0.165546598  |       | PTPRD          |
| 9                                       | 8314246                                       | 10612723     | -                    | 11165        |       | protein_coding |
| "protein tyrosine phosphatase, receptor | type D                                        | [Source:HGNC |                      |              |       |                |
| Symbol;Acc:HGNC:9668]"                  | -                                             | 89           | 73                   | 139          | 63    | 41             |
| 63                                      | 0.435939269                                   | 0.288269099  |                      | 0.57671139   |       |                |
| 0.272824293                             | 0.160023486                                   | 0.263407331  |                      |              |       |                |
| ENSG00000144278                         | 222.1366417                                   | 243.78815    |                      | 218.0490468  |       |                |
| 137.6272164                             | 197.3937335                                   | 110.8773537  |                      | 227.9912795  |       |                |
| 148.6327679                             | 0.616335568                                   | 0.041507884  |                      | 0.165630649  |       |                |
| GALNT13                                 | 2                                             | 153871913    | 154453849            | +            | 6520  |                |
| protein_coding                          | polypeptide N-acetylgalactosaminyltransferase | 13           |                      |              |       |                |
| [Source:HGNC                            | Symbol;Acc:HGNC:23242]                        | -            | 192                  | 263          | 223   |                |
| 137                                     | 216                                           | 113          | 1.610454079          | 1.778451847  |       |                |
| 1.584381355                             | 1.015954335                                   | 1.443659434  |                      | 0.809052834  |       |                |
| ENSG00000237418                         | 9.255693406                                   | 2.780853423  |                      | 4.888992081  |       | 0              |
| 0                                       | 0                                             | 5.641846303  | 0                    | 4.985543294  |       |                |
| 0.041521964                             | 1                                             | AC069257.2   | 3                    | 196298061    |       |                |
| 196298215                               | -                                             | 155          | processed_pseudogene | ribosomal    |       |                |
| protein L39 (RPL39)                     | pseudogene                                    | -            | 8                    | 3            | 5     | 0              |
| 0                                       | 0                                             | 2.822623816  | 0.853342772          | 1.494310204  |       |                |
| 0                                       | 0                                             | 0            |                      |              |       |                |
| ENSG00000283265                         | 3.470885027                                   | 12.97731597  |                      | 11.73358099  |       | 0              |
| 0                                       | 1.962431039                                   | 9.393927331  |                      | 0.65414368   |       |                |
| 3.85798171                              | 0.041535962                                   | 1            | AL356234.3           | 6            |       |                |
| 137693068                               | 137700415                                     | +            | 1160                 | lincRNA      | novel |                |
| transcript                              | -                                             | 3            | 14                   | 12           | 0     | 2              |
| 0.141435353                             | 0.532113166                                   | 0.479209824  |                      | 0            |       | 0              |
| 0.080485573                             |                                               |              |                      |              |       |                |
| ENSG00000106153                         | 6426.922109                                   | 8139.557968  |                      | 7945.58993   |       |                |
| 8270.692502                             | 9151.392812                                   | 9880.840281  |                      | 7504.023335  |       |                |
| 9100.975198                             | -0.278223825                                  | 0.041550547  |                      | 0.165757623  |       | CHCHD2         |
| 7                                       | 56101569                                      | 56106576     | -                    | 1132         |       |                |
| protein_coding                          | coiled-coil-helix-coiled-coil-helix           | domain       | containing           | 2            |       |                |
| [Source:HGNC                            | Symbol;Acc:HGNC:21645]                        | -            | 5555                 | 8781         | 8126  |                |
| 8233                                    | 10014                                         | 10070        | 268.3690008          | 342.0042542  |       |                |

|                         |                                                     |                                     |             |             |
|-------------------------|-----------------------------------------------------|-------------------------------------|-------------|-------------|
| 332.5315425             | 351.6518488                                         | 385.4958952                         | 415.2685864 |             |
| ENSG00000264978         | 0                                                   | 0                                   | 1.955596832 | 20.09156444 |
| 6.397019142             | 2.943646558                                         | 0.651865611                         |             |             |
| 9.81074338              | -3.885159902                                        | 0.041593132                         | 1           | RN7SL630P   |
| 12                      | 93831076                                            | 93831372                            | +           | 297         |
| misc_RNA                | "RNA, 7SL, cytoplasmic 630, pseudogene [Source:HGNC |                                     |             |             |
| Symbol;Acc:HGNC:46646]" | -                                                   | 0                                   | 0           | 2 20 7      |
| 3                       | 0                                                   | 0                                   | 0.311943544 | 3.255927777 |
| 1.027070342             | 0.471531642                                         |                                     |             |             |
| ENSG00000130985         | 5745.471682                                         | 5824.034018                         | 7020.592628 |             |
| 5467.919262             | 4498.018317                                         | 5326.03784                          | 6196.699443 |             |
| 5097.32514              | 0.281881378                                         | 0.041593882                         | 0.165887208 | UBA1        |
| X                       | 47190861                                            | 47215128                            | +           | 6437        |
| protein_coding          | ubiquitin like modifier activating enzyme 1         |                                     |             |             |
| [Source:HGNC            | Symbol;Acc:HGNC:12469]                              | -                                   | 4966        | 6283 7180   |
| 5443                    | 4922                                                | 5428                                | 42.1908154  | 43.03457403 |
| 51.67058647             | 40.8842506                                          | 33.32089806                         | 39.36428484 |             |
| ENSG00000268379         | 0                                                   | 1.853902282                         | 0           | 9.041203998 |
| 12.79403828             | 5.887293117                                         | 0.617967427                         |             |             |
| 9.240845133             | -3.841384922                                        | 0.041647359                         | 1           | AC025588.1  |
| 19                      | 57175233                                            | 57177921                            | +           | 2072        |
| processed_pseudogene    | pentatricopeptide repeat domain 3 pseudogene        |                                     |             |             |
| -                       | 0                                                   | 2                                   | 0           | 9 14 6 0    |
| 0.042557313             | 0                                                   | 0.21001677                          | 0.29444005  |             |
| 0.135178473             |                                                     |                                     |             |             |
| ENSG00000106665         | 952.1794591                                         | 1205.036483                         | 1457.897438 |             |
| 1728.87912              | 1489.5916                                           | 1437.480736                         | 1205.037794 |             |
| 1551.983819             | -0.364318374                                        | 0.041749963                         | 0.166466269 | CLIP2       |
| 7                       | 74289475                                            | 74405943                            | +           | 7315        |
| protein_coding          | CAP-Gly domain containing linker protein 2          |                                     |             |             |
| [Source:HGNC            | Symbol;Acc:HGNC:2586]                               | -                                   | 823         | 1300 1491   |
| 1721                    | 1630                                                | 1465                                | 6.15290511  | 7.835432611 |
| 9.44203854              | 11.37542827                                         | 9.71028265                          | 9.349089774 |             |
| ENSG00000085872         | 1935.596883                                         | 2946.777677                         | 2871.793948 |             |
| 3302.048616             | 2902.418971                                         | 3704.088586                         | 2584.722836 |             |
| 3302.852057             | -0.353203181                                        | 0.041859786                         | 0.16686064  | CHERP       |
| 19                      | 16517889                                            | 16542530                            | -           | 6113        |
| protein_coding          | calcium homeostasis endoplasmic reticulum protein   |                                     |             |             |
| [Source:HGNC            | Symbol;Acc:HGNC:16930]                              | -                                   | 1673        | 3179 2937   |
| 3287                    | 3176                                                | 3775                                | 14.96705167 | 22.9282068  |
| 22.2562508              | 25.99839422                                         | 22.64043129                         | 28.82760721 |             |
| ENSG00000091010         | 9.255693406                                         | 0                                   | 10.75578258 | 0 0         |
| 0                       | 6.670491995                                         | 0                                   | 5.228420716 | 0.041876947 |
| 1                       | POU4F3                                              | 5                                   | 146338839   | 146341722   |
| 2569                    | protein_coding                                      | POU class 4 homeobox 3 [Source:HGNC |             |             |
| Symbol;Acc:HGNC:9220]   | Pou                                                 | 8                                   | 0           | 11 0 0      |
| 0                       | 0.170302332                                         | 0                                   | 0.198349467 | 0 0         |
| 0                       |                                                     |                                     |             |             |
| ENSG00000168884         | 985.7313477                                         | 1192.059167                         | 1205.625447 |             |
| 1492.803238             | 1281.231548                                         | 1450.236538                         | 1127.805321 |             |

|                                                                                                         |              |                                                                                                                            |                |             |
|---------------------------------------------------------------------------------------------------------|--------------|----------------------------------------------------------------------------------------------------------------------------|----------------|-------------|
| 1408.090441                                                                                             | -0.319472322 | 0.041882246                                                                                                                | 0.166906647    | TNIP2       |
| 4                                                                                                       | 2741648      | 2756376                                                                                                                    | -              | 2686        |
| TNFAIP3 interacting protein 2 [Source:HGNC Symbol;Acc:HGNC:19118]                                       |              |                                                                                                                            | protein_coding |             |
| -                                                                                                       | 852          | 1286                                                                                                                       | 1233           | 1486        |
| 17.3471566                                                                                              | 21.10906116  | 21.26471292                                                                                                                | 1402           | 1478        |
| 22.74576789                                                                                             | 25.68706363  |                                                                                                                            | 26.74939831    |             |
| ENSG00000187801                                                                                         | 83.30124065  | 84.35255382                                                                                                                | 32.26734773    |             |
| 82.37541421                                                                                             | 187.3412749  | 115.7834313                                                                                                                | 66.64038073    |             |
| 128.5000401                                                                                             | -0.949638515 | 0.041914579                                                                                                                | 0.166991967    | ZFP69B      |
| 1                                                                                                       | 40450102     | 40463718                                                                                                                   | +              | 2386        |
| protein_coding ZFP69 zinc finger protein B [Source:HGNC Symbol;Acc:HGNC:28053]                          | zf-C2H2      | 72                                                                                                                         | 91             | 33          |
| 118                                                                                                     | 1.650276707  | 1.681531127                                                                                                                | 0.640687066    | 82          |
| 1.661669428                                                                                             | 3.744053272  | 2.308647377                                                                                                                |                | 205         |
| ENSG00000141367                                                                                         | 19656.77887  | 16863.09515                                                                                                                | 17288.4538     |             |
| 15909.5053                                                                                              | 14366.79113  | 15207.85934                                                                                                                | 17936.10927    |             |
| 15161.38526                                                                                             | 0.242426807  | 0.041927914                                                                                                                | 0.167001571    | CLTC        |
| 17                                                                                                      | 59619689     | 59696956                                                                                                                   | +              | 11836       |
| protein_coding clathrin heavy chain [Source:HGNC Symbol;Acc:HGNC:2092]                                  | -            | 16990                                                                                                                      | 18192          | 17681       |
| 15499                                                                                                   | 78.50243629  | 67.7656251                                                                                                                 | 69.19971781    | 15721       |
| 64.69477052                                                                                             | 57.88070456  | 61.12864337                                                                                                                |                |             |
| ENSG00000277481                                                                                         | 5.784808379  | 9.269511408                                                                                                                | 1.955596832    | 0           |
| 0                                                                                                       | 0            | 5.669972206                                                                                                                | 0              | 4.996953633 |
| 0.041944472                                                                                             | 1            | PKD1L3                                                                                                                     | 16             | 71929538    |
| -                                                                                                       | 5199         | protein_coding "polycystin 1 like 3, transient receptor potential channel interacting [Source:HGNC Symbol;Acc:HGNC:21716]" | -              | 5           |
| 0                                                                                                       | 0.052595053  | 0.084803571                                                                                                                | 0.017820202    | 10          |
| 0                                                                                                       | 0            |                                                                                                                            |                | 2           |
| ENSG00000088205                                                                                         | 4440.418911  | 4552.257053                                                                                                                | 4228.000351    | 0           |
| 3446.70788                                                                                              | 3815.364988  | 3860.101854                                                                                                                | 4406.892105    |             |
| 3707.391574                                                                                             | 0.24931711   | 0.041948642                                                                                                                | 0.167017286    | DDX18       |
| 2                                                                                                       | 117814650    | 117832379                                                                                                                  | +              | 7851        |
| protein_coding DEAD-box helicase 18 [Source:HGNC Symbol;Acc:HGNC:2741]                                  | -            | 3838                                                                                                                       | 4911           | 4324        |
| 3934                                                                                                    | 26.73466249  | 27.5790254                                                                                                                 | 25.51309603    | 3431        |
| 21.12987643                                                                                             | 23.17341825  | 23.39135683                                                                                                                |                | 4175        |
| ENSG00000133433                                                                                         | 129.5797077  | 123.2845017                                                                                                                | 224.8936357    |             |
| 85.38914887                                                                                             | 95.95528713  | 105.9712761                                                                                                                | 159.252615     |             |
| 95.77190403                                                                                             | 0.734210554  | 0.041953711                                                                                                                | 0.167017286    | GSTT2B      |
| 22                                                                                                      | 23957414     | 23961186                                                                                                                   | -              | 1099        |
| protein_coding glutathione S-transferase theta 2B (gene/pseudogene) [Source:HGNC Symbol;Acc:HGNC:33437] | -            |                                                                                                                            | 112            | 133         |
| 85                                                                                                      | 105          | 108                                                                                                                        | 5.573333649    | 5.335657038 |
| 9.694660375                                                                                             | 3.73957674   | 4.163419811                                                                                                                | 4.587457976    |             |
| ENSG00000054611                                                                                         | 822.5997514  | 957.5405285                                                                                                                | 919.1305112    |             |
| 1119.100139                                                                                             | 1163.343624  | 1075.412209                                                                                                                | 899.7569304    |             |
| 1119.285324                                                                                             | -0.314466537 | 0.041978311                                                                                                                | 0.167064668    |             |
| TBC1D22A                                                                                                | 22           | 46762617                                                                                                                   | 47175699       | +           |
|                                                                                                         |              |                                                                                                                            |                | 5315        |

|                                                                |                         |             |                                      |                  |             |        |
|----------------------------------------------------------------|-------------------------|-------------|--------------------------------------|------------------|-------------|--------|
| protein_coding TBC1 domain family member 22A [Source:HGNC      |                         |             |                                      |                  |             |        |
| Symbol;Acc:HGNC:1309]                                          | -                       | 711         | 1033                                 | 940              | 1114        | 1273   |
| 1096                                                           | 7.315786868             | 8.569017122 | 8.192699781                          |                  |             |        |
| 10.13405223                                                    | 10.43719344             | 9.626165434 |                                      |                  |             |        |
| ENSG00000247950                                                | 1.156961676             | 20.3929251  | 11.73358099                          |                  |             |        |
| 43.19686355                                                    | 54.83159264             | 17.66187935 | 11.09448926                          |                  |             |        |
| 38.56344518                                                    | -1.783340601            | 0.04198747  | 0.167064668                          |                  |             |        |
| SEC24B-AS1                                                     | 4                       | 109347475   | 109433817                            | -                |             | 2584   |
| antisense SEC24B antisense RNA 1 [Source:HGNC                  |                         |             |                                      |                  |             |        |
| Symbol;Acc:HGNC:44003]                                         | -                       | 1           | 22                                   | 12               | 43          | 60     |
| 18                                                             | 0.021164217             | 0.375373949 | 0.215125153                          |                  |             |        |
| 0.804594691                                                    | 1.011852802             | 0.325181651 |                                      |                  |             |        |
| ENSG00000037897                                                | 329.7340776             | 376.3421632 | 386.2303744                          |                  |             |        |
| 548.4997092                                                    | 477.034856              | 435.6596906 | 364.102205                           |                  |             |        |
| 487.064752                                                     | -0.418841142            | 0.042064931 | 0.167329326                          |                  |             | METTL1 |
| 12                                                             | 57768471                | 57772793    | -                                    | 2621             |             |        |
| protein_coding methyltransferase like 1 [Source:HGNC           |                         |             |                                      |                  |             |        |
| Symbol;Acc:HGNC:7030]                                          | -                       | 285         | 406                                  | 395              | 546         | 522    |
| 444                                                            | 5.946652378             | 6.829563865 | 6.981239391                          |                  |             |        |
| 10.07225792                                                    | 8.678847951             | 7.907914862 |                                      |                  |             |        |
| ENSG00000196584                                                | 675.6656186             | 581.1983653 | 624.8131879                          |                  |             |        |
| 474.1609208                                                    | 554.7129456             | 386.5989147 | 627.225724                           |                  |             |        |
| 471.8242604                                                    | 0.40986767              | 0.042136253 | 0.167569432                          |                  |             | XRCC2  |
| 7                                                              | 152644779               | 152676165   | -                                    | 4853             |             |        |
| protein_coding X-ray repair cross complementing 2 [Source:HGNC |                         |             |                                      |                  |             |        |
| Symbol;Acc:HGNC:12829]                                         | -                       | 584         | 627                                  | 639              | 472         | 607    |
| 394                                                            | 6.581081491             | 5.696278408 | 6.099482964                          |                  |             |        |
| 4.702544607                                                    | 5.450508202             | 3.789936787 |                                      |                  |             |        |
| ENSG00000238793                                                | 8.09873173              | 3.707804563 | 4.888992081                          |                  |             | 0      |
| 0                                                              | 0                       | 5.565176125 | 0                                    | 4.966824433      |             |        |
| 0.042172847                                                    | 1                       | SNORD124    | 17                                   | 40027542         |             |        |
| 40027645                                                       | -                       | 104         | snoRNA "small nucleolar RNA, C/D box |                  |             |        |
| 124 [Source:HGNC                                               | Symbol;Acc:HGNC:33563]" | -           | 7                                    | 4                |             |        |
| 5                                                              | 0                       | 0           | 0                                    | 3.680945721      | 1.695745253 |        |
| 2.227096938                                                    | 0                       | 0           | 0                                    |                  |             |        |
| ENSG00000236031                                                | 8.09873173              | 3.707804563 | 4.888992081                          |                  |             | 0      |
| 0                                                              | 0                       | 5.565176125 | 0                                    | 4.966824433      |             |        |
| 0.042172847                                                    | 1                       | AL591721.1  | 1                                    | 243545532        |             |        |
| 243548329                                                      | +                       | 751         | antisense                            | novel transcript |             |        |
| -                                                              | 7                       | 4           | 5                                    | 0                | 0           |        |
| 0.509744814                                                    | 0.234830235             | 0.308412892 | 0                                    | 0                | 0           |        |
| ENSG00000243943                                                | 741.6124341             | 540.4125151 | 608.1906149                          |                  |             |        |
| 501.2845328                                                    | 508.1060918             | 410.1480871 | 630.0718547                          |                  |             |        |
| 473.1795706                                                    | 0.411997085             | 0.042184947 | 0.167719452                          |                  |             | ZNF512 |
| 2                                                              | 27582969                | 27623215    | +                                    | 4398             |             |        |
| protein_coding zinc finger protein 512 [Source:HGNC            |                         |             |                                      |                  |             |        |
| Symbol;Acc:HGNC:29380]                                         | zf-C2H2                 | 641         | 583                                  | 622              | 499         | 556    |
| 418                                                            | 7.970719339             | 5.844498987 | 6.551452785                          |                  |             |        |
| 5.485882951                                                    | 5.509068397             | 4.436771807 |                                      |                  |             |        |
| ENSG00000196109                                                | 0                       | 0.926951141 | 0                                    | 9.041203998      |             |        |

|                                                                 |              |                |              |                |                |             |        |
|-----------------------------------------------------------------|--------------|----------------|--------------|----------------|----------------|-------------|--------|
| 6.397019142                                                     | 5.887293117  | 0.308983714    |              |                |                |             |        |
| 7.108505419                                                     | -4.287193981 | 0.042202432    | 1            | ZNF676         | 19             |             |        |
| 22179091                                                        | 22215775     | -              | 3088         | protein_coding |                |             |        |
| zinc finger protein 676 [Source:HGNC Symbol;Acc:HGNC:20429]     |              |                |              |                |                |             |        |
| zf-C2H2                                                         | 0            | 1              | 0            | 9              | 7              | 6           | 0      |
| 0.014277648                                                     | 0            | 0.140917988    | 0.098782348  |                |                |             |        |
| 0.090702654                                                     |              |                |              |                |                |             |        |
| ENSG00000280169                                                 | 0            | 0.926951141    | 0            | 12.05493866    | 0              |             |        |
| 13.73701727                                                     | 0.308983714  | 8.597318646    | -4.560317391 |                |                |             |        |
| 0.042204715                                                     | 1            | AL136526.1     | 13           | 100537365      |                |             |        |
| 100539567                                                       | +            | 2203           | antisense    | "novel         |                |             |        |
| transcript, antisense to GGACT"                                 |              |                |              |                |                |             |        |
| 0                                                               | 14           | 0              | 0.020013335  | 0              | 0.263371008    |             |        |
| 0                                                               | 0.296660398  |                |              |                |                |             |        |
| ENSG00000068078                                                 | 9.255693406  | 4.634755704    | 2.933395248  | 0              |                |             |        |
| 0                                                               | 0            | 5.607948119    | 0            | 4.977230131    |                |             |        |
| 0.042208593                                                     | 1            | FGFR3          | 4            | 1793293        | 1808872        | +           | 4848   |
| protein_coding fibroblast growth factor receptor 3              |              |                |              |                |                |             |        |
| [Source:HGNC Symbol;Acc:HGNC:3690]                              |              |                |              |                |                |             |        |
| 0                                                               | 0            | 0              | 0.09024478   | 0.045471717    |                |             |        |
| 0.028665604                                                     | 0            | 0              | 0            |                |                |             |        |
| ENSG00000145545                                                 | 735.8276258  | 655.3544566    | 738.2378042  |                |                |             |        |
| 513.3394715                                                     | 592.1812006  | 555.367984     | 709.8066288  |                |                |             |        |
| 553.629552                                                      | 0.357939189  | 0.042208758    | 0.167750617  |                |                |             | SRD5A1 |
| 5                                                               | 6633343      | 6674386        | +            | 7715           | protein_coding |             |        |
| steroid 5 alpha-reductase 1 [Source:HGNC Symbol;Acc:HGNC:11284] |              |                |              |                |                |             |        |
| 636                                                             | 707          | 755            | 511          | 648            | 566            | 4.508332077 | -      |
| 4.040335611                                                     | 4.533289736  | 3.202478231    | 3.660139796  |                |                |             |        |
| 3.424731565                                                     |              |                |              |                |                |             |        |
| ENSG00000259330                                                 | 432.7036667  | 372.6343586    | 492.8104017  |                |                |             |        |
| 252.1491337                                                     | 350.0083331  | 335.5757077    | 432.7161424  |                |                |             |        |
| 312.5777248                                                     | 0.468497296  | 0.042214733    | 0.167750617  |                |                |             | INAFM2 |
| 15                                                              | 40323664     | 40326715       | +            | 3052           |                |             |        |
| protein_coding InaF motif containing 2 [Source:HGNC             |              |                |              |                |                |             |        |
| Symbol;Acc:HGNC:35165]                                          |              |                |              |                |                |             |        |
| 342                                                             | 6.701650664  | 5.807316312    | 7.649771501  |                |                |             | 383    |
| 3.976403146                                                     | 5.468558249  | 5.231034841    |              |                |                |             |        |
| ENSG00000112303                                                 | 3.470885027  | 8.342560268    | 4.888992081  | 0              |                |             |        |
| 0                                                               | 0            | 5.567479125    | 0            | 4.972266564    |                |             |        |
| 0.04221832                                                      | 1            | VNN2           | 6            | 132743870      | 132763459      |             |        |
| -                                                               | 2633         | protein_coding | vanin 2      | [Source:HGNC   |                |             |        |
| Symbol;Acc:HGNC:12706]                                          |              |                |              |                |                |             |        |
| 0                                                               | 0.062311056  | 0.150704288    | 0.087967369  | 0              |                |             | 0      |
| 0                                                               | 0            |                |              |                |                |             |        |
| ENSG00000279675                                                 | 3.470885027  | 8.342560268    | 4.888992081  | 0              |                |             |        |
| 0                                                               | 0            | 5.567479125    | 0            | 4.972266564    |                |             |        |
| 0.04221832                                                      | 1            | AC080100.1     | 11           | 40107244       |                |             |        |
| 40112599                                                        | -            | 5356           | TEC          | TEC            | -              | 3           | 9      |
| 5                                                               | 0            | 0              | 0            | 0.030632003    | 0.074085958    |             |        |
| 0.043244601                                                     | 0            | 0              | 0            |                |                |             |        |

|                                                         |              |             |             |               |                |      |
|---------------------------------------------------------|--------------|-------------|-------------|---------------|----------------|------|
| ENSG00000111639                                         | 1217.123683  | 1162.396731 | 1211.492238 |               |                |      |
| 756.4474012                                             | 893.7549601  | 1140.172434 | 1197.004217 |               |                |      |
| 930.1249316                                             | 0.36381536   | 0.042247187 | 0.167835953 | MRPL51        |                |      |
| 12                                                      | 6491886      | 6493841     | -           | 1551          | protein_coding |      |
| mitochondrial ribosomal protein L51 [Source:HGNC        |              |             |             |               |                |      |
| Symbol;Acc:HGNC:14044]                                  | -            | 1052        | 1254        | 1239          | 753            | 978  |
| 1162                                                    | 37.09357184  | 35.64673    | 37.00513257 |               |                |      |
| 23.47385377                                             | 27.47803388  | 34.97360221 |             |               |                |      |
| ENSG00000145779                                         | 446.5872068  | 353.1683847 | 316.8066868 |               |                |      |
| 236.0758822                                             | 326.2479762  | 215.8674143 | 372.1874261 |               |                |      |
| 259.3970909                                             | 0.519046705  | 0.042344689 | 0.168179596 |               |                |      |
| TNFAIP8                                                 | 5            | 119268692   | 119399688   | +             | 9591           |      |
| protein_coding TNF alpha induced protein 8 [Source:HGNC |              |             |             |               |                |      |
| Symbol;Acc:HGNC:17260]                                  | -            | 386         | 381         | 324           | 235            | 357  |
| 220                                                     | 2.200990289  | 1.751439107 | 1.564889134 |               |                |      |
| 1.184691269                                             | 1.622045091  | 1.07079128  |             |               |                |      |
| ENSG00000261061                                         | 238.3341052  | 223.3952249 | 293.3395248 |               |                |      |
| 203.9293791                                             | 155.3561792  | 154.0508366 | 251.6896183 |               |                |      |
| 171.1121316                                             | 0.557378926  | 0.04237617  | 0.168260914 |               |                |      |
| AC092718.4                                              | 16           | 81030770    | 81031485    | +             | 716            |      |
| sense_intronic novel transcript                         |              |             |             |               |                |      |
| 300                                                     | 203          | 170         | 157         | 15.73435378   | 14.84013932    |      |
| 19.40933644                                             | 13.70831995  | 10.34652465 | 10.2360563  |               |                |      |
| ENSG00000196372                                         | 576.1669145  | 748.0495707 | 677.6143024 |               |                |      |
| 875.9922096                                             | 723.7770229  | 1027.332649 | 667.2769292 |               |                |      |
| 875.7006271                                             | -0.391095102 | 0.042434296 | 0.168402422 | ASB13         |                |      |
| 10                                                      | 5638867      | 5666595     | -           | 3003          | protein_coding |      |
| ankyrin repeat and SOCS box containing 13 [Source:HGNC  |              |             |             |               |                |      |
| Symbol;Acc:HGNC:19765]                                  | -            | 498         | 807         | 693           | 872            | 792  |
| 1047                                                    | 9.069194653  | 11.84819411 | 10.6900653  |               |                |      |
| 14.03984681                                             | 11.49286875  | 16.27561415 |             |               |                |      |
| ENSG00000277152                                         | 13.88354011  | 15.75816939 | 35.20074298 |               |                |      |
| 10.04578222                                             | 0            | 0           | 21.61415083 | 3.348594073   |                |      |
| 2.703143401                                             | 0.042436851  | 0.168402422 | AC110048.2  | 15            |                |      |
| 66860303                                                | 66867023     | +           | 6721        | lincRNA novel |                |      |
| transcript                                              |              |             |             |               |                |      |
| 0.097643213                                             | 0.11151903   | 0.248125307 | 0.071939484 |               |                |      |
| 0                                                       | 0            |             |             |               |                |      |
| ENSG00000142409                                         | 736.9845874  | 1314.416718 | 1382.60696  |               |                |      |
| 1523.945163                                             | 1372.617536  | 1746.563625 | 1144.669422 |               |                |      |
| 1547.708774                                             | -0.434232482 | 0.042450277 | 0.168402422 | ZNF787        |                |      |
| 19                                                      | 56087366     | 56121280    | -           | 3671          |                |      |
| protein_coding zinc finger protein 787 [Source:HGNC     |              |             |             |               |                |      |
| Symbol;Acc:HGNC:26998]                                  | zf-C2H2      | 637         | 1418        | 1414          | 1517           | 1502 |
| 1780                                                    | 9.489640509  | 17.03043748 | 17.84298378 |               |                |      |
| 19.98031877                                             | 17.82970452  | 22.63506019 |             |               |                |      |
| ENSG00000117682                                         | 975.3186926  | 892.6539486 | 768.5495551 |               |                |      |
| 1245.676995                                             | 994.2795466  | 1109.754753 | 878.8407321 |               |                |      |
| 1116.570431                                             | -0.345679237 | 0.042455873 | 0.168402422 | DHDDS         |                |      |
| 1                                                       | 26432282     | 26471294    | +           | 5596          |                |      |

|                                     |                                              |                        |                |                              |             |             |   |  |
|-------------------------------------|----------------------------------------------|------------------------|----------------|------------------------------|-------------|-------------|---|--|
| protein_coding                      | dehydrodolichyl diphosphate synthase subunit |                        |                |                              |             |             |   |  |
| [Source:HGNC Symbol;Acc:HGNC:20603] |                                              | -                      | 843            | 963                          | 786         |             |   |  |
| 1240                                | 1088                                         | 1131                   | 8.238432382    | 7.587217592                  |             |             |   |  |
| 6.506497931                         | 10.71384097                                  |                        | 8.472465075    | 9.43476169                   |             |             |   |  |
| ENSG00000207955                     | 1.156961676                                  | 0                      | 0              | 7.032047554                  |             |             |   |  |
| 8.224738897                         | 5.887293117                                  |                        | 0.385653892    |                              |             |             |   |  |
| 7.048026523                         | -4.275596506                                 |                        | 0.042475186    | 1                            | AL359091.1  |             |   |  |
| 9                                   | 128392007                                    |                        | 128393510      | -                            | 1504        |             |   |  |
| lincRNA novel transcript            |                                              |                        | -              | 1                            | 0           | 0           | 7 |  |
| 9                                   | 6                                            | 0.036361926            | 0              | 0                            | 0           | 0.2250357   |   |  |
| 0.260767384                         | 0.186229917                                  |                        |                |                              |             |             |   |  |
| ENSG00000259138                     | 0                                            | 0                      | 0              | 13.05951689                  | 7.310879019 |             |   |  |
| 0                                   | 0                                            | 6.790131969            |                | -5.182946051                 | 0.042486209 |             |   |  |
| 1                                   | AL049780.2                                   | 14                     |                | 75127153                     | 75136930    |             |   |  |
| +                                   | 367                                          | antisense              |                | "novel transcript, antisense |             |             |   |  |
| to NEK9 and TMED10"                 | -                                            | 0                      | 0              | 0                            | 13          | 8           |   |  |
| 0                                   | 0                                            | 0                      | 0              | 1.712688985                  | 0.949910133 |             |   |  |
| 0                                   |                                              |                        |                |                              |             |             |   |  |
| ENSG00000151287                     | 537.9871792                                  |                        | 510.7500786    | 494.7659986                  |             |             |   |  |
| 397.8129759                         | 371.9409701                                  |                        | 410.1480871    | 514.5010855                  |             |             |   |  |
| 393.3006777                         | 0.387417918                                  |                        | 0.042512319    | 0.168582574                  | TEX30       |             |   |  |
| 13                                  | 102765990                                    |                        | 102773811      | -                            | 2154        |             |   |  |
| protein_coding                      | testis expressed 30                          | [Source:HGNC           |                |                              |             |             |   |  |
| Symbol;Acc:HGNC:25188]              | -                                            | 465                    | 551            | 506                          | 396         | 407         |   |  |
| 418                                 | 11.80597792                                  |                        | 11.27820172    | 10.88196372                  |             |             |   |  |
| 8.888954915                         | 8.233932606                                  |                        | 9.058924052    |                              |             |             |   |  |
| ENSG00000127507                     | 23.13923351                                  |                        | 3.707804563    | 2.933395248                  |             |             |   |  |
| 2.009156444                         | 0                                            | 0                      | 9.926811109    | 0.669718815                  |             |             |   |  |
| 3.908134609                         | 0.042559973                                  | 1                      | ADGRE2         | 19                           | 14732393    |             |   |  |
| 14778541                            | -                                            | 8622                   | protein_coding | adhesion G                   |             |             |   |  |
| protein-coupled receptor E2         | [Source:HGNC                                 | Symbol;Acc:HGNC:3337]  | -              |                              |             |             |   |  |
| 20                                  | 4                                            | 3                      | 2              | 0                            | 0           | 0.126857658 |   |  |
| 0.020454362                         | 0.016118169                                  |                        | 0.011215618    | 0                            | 0           |             |   |  |
| ENSG00000064042                     | 0                                            | 0.926951141            |                | 2.933395248                  | 13.05951689 |             |   |  |
| 18.27719755                         | 3.924862078                                  |                        | 1.28678213     | 11.75385884                  |             |             |   |  |
| -3.164989729                        | 0.042568931                                  | 1                      | LIMCH1         | 4                            |             |             |   |  |
| 41359607                            | 41700044                                     | +                      | 10862          | protein_coding               | LIM         |             |   |  |
| and calponin homology domains 1     | [Source:HGNC                                 | Symbol;Acc:HGNC:29191] |                |                              |             |             |   |  |
| -                                   | 0                                            | 1                      | 3              | 13                           | 20          | 4           | 0 |  |
| 0.004059048                         | 0.012794223                                  |                        | 0.057867507    | 0.08023776                   |             |             |   |  |
| 0.017190806                         |                                              |                        |                |                              |             |             |   |  |
| ENSG00000085788                     | 2083.687978                                  |                        | 1960.501663    | 2337.916013                  |             |             |   |  |
| 1739.929481                         | 1777.457462                                  |                        | 1744.601194    | 2127.368551                  |             |             |   |  |
| 1753.996045                         | 0.27839678                                   |                        | 0.042588922    | 0.168758176                  | DDHD2       |             |   |  |
| 8                                   | 38225218                                     |                        | 38275558       | +                            | 10686       |             |   |  |
| protein_coding                      | DDHD domain containing 2                     | [Source:HGNC           |                |                              |             |             |   |  |
| Symbol;Acc:HGNC:29106]              | -                                            | 1801                   | 2115           | 2391                         | 1732        | 1945        |   |  |
| 1778                                | 9.217077851                                  |                        | 8.726280317    | 10.36494166                  |             |             |   |  |
| 7.83671286                          | 7.931640717                                  |                        | 7.767166637    |                              |             |             |   |  |
| ENSG00000179051                     | 5886.621006                                  |                        | 6557.25237     | 8277.063593                  |             |             |   |  |



|                                     |                                                     |               |              |             |
|-------------------------------------|-----------------------------------------------------|---------------|--------------|-------------|
| 6025.460176                         | 5145.94497                                          | 5655.726254   | 6906.97899   |             |
| 5609.0438                           | 0.300444444                                         | 0.042591255   | 0.168758176  | RCC2        |
| 1                                   | 17406760                                            | 17439724      | - 4126       |             |
| protein_coding                      | regulator of chromosome condensation 2 [Source:HGNC |               |              |             |
| Symbol;Acc:HGNC:30297]              | -                                                   | 5088 7074     | 8465 5998    | 5631        |
| 5764                                | 67.43922825                                         | 75.59094763   | 95.03863599  |             |
| 70.2875579                          | 59.47232286                                         | 65.21399177   |              |             |
| ENSG00000176783                     | 1381.412241                                         | 1274.557819   | 1277.004732  |             |
| 1032.706412                         | 1105.770452                                         | 1068.543701   | 1310.991597  |             |
| 1069.006855                         | 0.294027751                                         | 0.042599011   | 0.168758176  | RUFY1       |
| 5                                   | 179550558                                           | 179610026     | + 5911       |             |
| protein_coding                      | RUN and FYVE domain containing 1 [Source:HGNC       |               |              |             |
| Symbol;Acc:HGNC:19760]              | -                                                   | 1194 1375     | 1306 1028    | 1210        |
| 1089                                | 11.04684042                                         | 10.25594532   | 10.23492521  |             |
| 8.40878739                          | 8.920372881                                         | 8.600287236   |              |             |
| ENSG00000118363                     | 2242.191728                                         | 2235.806152   | 2241.11397   |             |
| 1941.849703                         | 1810.356417                                         | 1857.440978   | 2239.70395   |             |
| 1869.882366                         | 0.260420939                                         | 0.042600759   | 0.168758176  | SPCS2       |
| 11                                  | 74949247                                            | 74979031      | + 2982       |             |
| protein_coding                      | signal peptidase complex subunit 2 [Source:HGNC     |               |              |             |
| Symbol;Acc:HGNC:28962]              | -                                                   | 1938 2412     | 2292 1933    | 1981        |
| 1893                                | 35.54191684                                         | 35.66182975   | 35.6048721   |             |
| 31.341908                           | 28.94912451                                         | 29.63391362   |              |             |
| ENSG00000241369                     | 0 0                                                 | 24.4449604    | 0 0 0        |             |
| 8.148320135                         | 0                                                   | 5.521095169   | 0.042616337  | 1           |
| LINC01192                           | 3                                                   | 163127923     | 163361563    | -           |
| 3079                                | lincRNA long intergenic non-protein coding RNA 1192 |               |              |             |
| [Source:HGNC Symbol;Acc:HGNC:37197] | -                                                   | 0             | 0            | 25          |
| 0                                   | 0                                                   | 0             | 0.376125498  | 0           |
| 0                                   | 0                                                   |               |              |             |
| ENSG00000131668                     | 0 0                                                 | 0 17.07782977 | 3.65543951   |             |
| 0                                   | 0                                                   | 6.911089761   | -5.207522534 | 0.042626989 |
| 1                                   | BARX1                                               | 9 93951622    | 93955372     | -           |
| 1777                                | protein_coding BARX homeobox 1 [Source:HGNC         |               |              |             |
| Symbol;Acc:HGNC:955]                | Homeobox                                            | 0             | 0 0          | 17          |
| 4                                   | 0 0                                                 | 0 0           | 0.462554287  |             |
| 0.098091452                         | 0                                                   |               |              |             |
| ENSG00000165716                     | 26.61011854                                         | 14.83121825   | 16.62257307  |             |
| 106.4852915                         | 18.27719755                                         | 35.3237587    | 19.35463662  |             |
| 53.36208259                         | -1.466406088                                        | 0.042644741   | 0.168888643  | FAM69B      |
| 9                                   | 136712570                                           | 136724050     | + 2704       |             |
| protein_coding                      | family with sequence similarity 69 member B         |               |              |             |
| [Source:HGNC Symbol;Acc:HGNC:28290] | -                                                   | 23            | 16           | 17          |
| 106                                 | 20 36                                               | 0.465174459   | 0.260883885  |             |
| 0.291235753                         | 1.895397897                                         | 0.322316031   | 0.621501025  |             |
| ENSG00000145388                     | 780.9491311                                         | 798.1049323   | 765.6161599  |             |
| 1001.564487                         | 994.2795466                                         | 921.3613728   | 781.5567411  |             |
| 972.4018023                         | -0.315182659                                        | 0.042662448   | 0.168915008  |             |
| METTL14                             | 4 118685368                                         | 118715433     | + 6862       |             |
| protein_coding                      | methyltransferase like 14 [Source:HGNC              |               |              |             |

|                                        |                                    |             |                                     |                |      |                |
|----------------------------------------|------------------------------------|-------------|-------------------------------------|----------------|------|----------------|
| Symbol;Acc:HGNC:29330]                 | -                                  | 675         | 861                                 | 783            | 997  | 1088           |
| 939                                    | 5.379572587                        | 5.532053809 | 5.285833805                         |                |      |                |
| 7.024989203                            | 6.909343422                        | 6.387941266 |                                     |                |      |                |
| ENSG0000011198                         | 1228.6933                          | 956.6135774 | 968.020432                          |                |      |                |
| 1232.617478                            | 1448.467906                        | 1293.242055 | 1051.109103                         |                |      |                |
| 1324.775813                            | -0.334786826                       | 0.042694216 | 0.168997016                         |                |      | ABHD5          |
| 3                                      | 43690108                           | 43734371    | +                                   | 7549           |      |                |
| protein_coding                         | abhydrolase domain containing 5    |             |                                     |                |      |                |
| Symbol;Acc:HGNC:21396]                 | -                                  | 1062        | 1032                                | 990            | 1227 | 1585           |
| 1318                                   | 7.693603562                        | 6.027319728 | 6.075027176                         |                |      |                |
| 7.858802124                            | 9.149522699                        | 8.150270461 |                                     |                |      |                |
| ENSG00000227619                        | 10.41265508                        | 4.634755704 | 1.955596832                         |                |      | 0              |
| 0                                      | 0                                  | 5.667669206 | 0                                   | 4.991754421    |      |                |
| 0.042716747                            | 1                                  | AL391056.1  | 9                                   | 129575409      |      |                |
| 129584556                              | +                                  | 2449        | lincRNA novel transcript (FLJ20378) |                |      |                |
| -                                      | 9                                  | 5           | 2                                   | 0              | 0    |                |
| 0.200977962                            | 0.09001506                         | 0.037830638 | 0                                   | 0              |      | 0              |
| ENSG00000177738                        | 105.2835125                        | 167.7781565 | 138.8473751                         |                |      |                |
| 154.7050462                            | 221.1540903                        | 275.721561  | 137.3030147                         |                |      |                |
| 217.1935658                            | -0.659480297                       | 0.04272692  | 0.169002426                         |                |      |                |
| AC025171.1                             | 5                                  | 43014414    | 43067419                            | -              |      | 2784           |
| sense_overlapping                      | uncharacterized LOC648987          |             |                                     |                |      |                |
| gene;Acc:648987]                       | -                                  | 91          | 181                                 | 142            | 154  | 242            |
| 281                                    | 1.78758571                         | 2.866442946 | 2.36277066                          |                |      |                |
| 2.674562225                            | 3.787954317                        | 4.711759608 |                                     |                |      |                |
| ENSG00000110497                        | 905.9009921                        | 937.1476034 | 1111.756799                         |                |      |                |
| 1187.411458                            | 1230.055395                        | 1263.805589 | 984.9351316                         |                |      |                |
| 1227.090814                            | -0.316837114                       | 0.042736338 | 0.169002426                         |                |      | AMBRA1         |
| 11                                     | 46396414                           | 46594125    | -                                   | 7673           |      |                |
| protein_coding                         | autophagy and beclin 1 regulator 1 |             |                                     |                |      |                |
| Symbol;Acc:HGNC:25990]                 | -                                  | 783         | 1011                                | 1137           | 1182 | 1346           |
| 1288                                   | 5.580733406                        | 5.809247976 | 6.864323178                         |                |      |                |
| 7.44823713                             | 7.64431297                         | 7.836041018 |                                     |                |      |                |
| ENSG00000139835                        | 16.19746346                        | 15.75816939 | 38.13413823                         |                |      |                |
| 7.032047554                            | 0                                  | 7.849724156 | 23.36325703                         | 4.96059057     |      |                |
| 2.244508701                            | 0.042737464                        | 0.169002426 | GRTP1                               | 13             |      |                |
| 113324164                              | 113364148                          | -           | 2916                                | protein_coding |      |                |
| growth hormone regulated TBC protein 1 |                                    |             |                                     |                |      |                |
| Symbol;Acc:HGNC:20310]                 | -                                  | 14          | 17                                  | 39             | 7    | 0              |
| 8                                      | 0.26256403                         | 0.257036832 | 0.619554539                         |                |      |                |
| 0.116067796                            | 0                                  | 0.128070323 |                                     |                |      |                |
| ENSG00000132386                        | 215.1948717                        | 217.8335181 | 332.4514615                         |                |      |                |
| 226.0301                               | 119.7156439                        | 141.2950348 | 255.1599504                         |                |      |                |
| 162.3469262                            | 0.653888713                        | 0.042742508 | 0.169002426                         |                |      |                |
| SERPINF1                               | 17                                 | 1761959     | 1777574                             | +              | 3069 | protein_coding |
| serpin family F member 1               |                                    |             |                                     |                |      |                |
| Symbol;Acc:HGNC:8824]                  | -                                  | 186         | 235                                 | 340            | 225  | 131            |
| 144                                    | 3.314444632                        | 3.376019386 | 5.131974437                         | 3.54476008     |      |                |
| 1.860085918                            | 2.19034053                         |             |                                     |                |      |                |
| ENSG00000138777                        | 1250.675571                        | 1261.580503 | 1187.047277                         |                |      |                |

|                                  |                                               |                       |                             |             |
|----------------------------------|-----------------------------------------------|-----------------------|-----------------------------|-------------|
| 777.5435438                      | 1219.089076                                   | 840.9017002           | 1233.101117                 |             |
| 945.8447735                      | 0.382127886                                   | 0.042750859           | 0.169002426                 | PPA2        |
| 4                                | 105369077                                     | 105474081             | - 4654                      |             |
| protein_coding                   | pyrophosphatase (inorganic) 2 [Source:HGNC    |                       |                             |             |
| Symbol;Acc:HGNC:28883]           | -                                             | 1081 1361             | 1214 774                    | 1334        |
| 857                              | 12.7026411                                    | 12.89334799           | 12.08355612                 |             |
| 8.041106205                      | 12.49073655                                   | 8.596080597           |                             |             |
| ENSG00000240098                  | 0 0                                           | 0                     | 12.05493866                 | 8.224738897 |
| 0                                | 0                                             | 6.75989252            | -5.17674503                 | 0.042801864 |
| 1                                | RN7SL351P                                     | 11                    | 126245035                   | 126245282   |
| +                                | 248 misc_RNA                                  |                       | "RNA, 7SL, cytoplasmic 351, |             |
| pseudogene [Source:HGNC          | Symbol;Acc:HGNC:46367]"                       | -                     | 0                           | 0           |
| 0                                | 12 9                                          | 0 0                   | 0 0                         |             |
| 2.339541653                      | 1.581428009                                   | 0                     |                             |             |
| ENSG00000136999                  | 961.4351525                                   | 997.3994276           | 803.7502981                 |             |
| 1038.733882                      | 1173.396083                                   | 1278.523822           | 920.8616261                 |             |
| 1163.551262                      | -0.337635576                                  | 0.042834239           | 0.16925984                  | NOV         |
| 8                                | 119416306                                     | 119424353             | + 2673                      |             |
| protein_coding                   | nephroblastoma overexpressed [Source:HGNC     |                       |                             |             |
| Symbol;Acc:HGNC:7885]            | -                                             | 831 1076              | 822 1034                    | 1284        |
| 1303                             | 17.00187339                                   | 17.74791216           | 14.24542185                 |             |
| 18.70349623                      | 20.93267173                                   | 22.75576776           |                             |             |
| ENSG00000083642                  | 2046.665204                                   | 1850.194477           | 1776.659722                 |             |
| 1846.414772                      | 1306.819625                                   | 1322.67852            | 1891.173135                 |             |
| 1491.970972                      | 0.342083377                                   | 0.042838119           | 0.16925984                  | PDS5B       |
| 13                               | 32586427                                      | 32778019              | + 13212                     |             |
| protein_coding                   | PDS5 cohesin associated factor B [Source:HGNC |                       |                             |             |
| Symbol;Acc:HGNC:20418]           | -                                             | 1769 1996             | 1817 1838                   | 1430        |
| 1348                             | 7.322408958                                   | 6.660792889           | 6.370724405                 |             |
| 6.726329816                      | 4.716567675                                   | 4.762855032           |                             |             |
| ENSG00000196696                  | 123.7948993                                   | 107.5263323           | 101.6910353                 |             |
| 43.19686355                      | 42.03755436                                   | 94.19668987           | 111.004089                  |             |
| 59.81036926                      | 0.892207567                                   | 0.042947171           | 0.169608599                 |             |
| PDXDC2P-NPIP14P                  | 16                                            | 69976297              | 70065948                    | -           |
| 6114                             | processed_transcript                          | nuclear pore complex- |                             |             |
| interacting protein [Source:NCBI | gene;Acc:283970]                              | -                     |                             | 107         |
| 116                              | 104 43                                        | 46 96                 | 0.957090611                 |             |
| 0.836501093                      | 0.787971229                                   | 0.340051142           | 0.327861933                 |             |
| 0.73297951                       |                                               |                       |                             |             |
| ENSG00000089737                  | 3521.791341                                   | 3693.900296           | 3572.875413                 |             |
| 4553.75308                       | 4253.103869                                   | 4003.359319           | 3596.189017                 |             |
| 4270.07209                       | -0.247709813                                  | 0.042948576           | 0.169608599                 | DDX24       |
| 14                               | 94048291                                      | 94081245              | - 8636                      |             |
| protein_coding                   | DEAD-box helicase 24 [Source:HGNC             |                       |                             |             |
| Symbol;Acc:HGNC:13266]           | -                                             | 3044 3985             | 3654 4533                   | 4654        |
| 4080                             | 19.2764354                                    | 20.34462317           | 19.60010352                 |             |
| 25.37898809                      | 23.48401467                                   | 22.05431459           |                             |             |
| ENSG00000272146                  | 0 13.90426711                                 | 5.866790497           | 0 0                         |             |
| 0                                | 6.590352537                                   | 0                     | 5.217668955                 | 0.042969327 |
| 1                                | ARF4-AS1                                      | 3                     | 57597715                    | 57600927    |

|                                                     |                                                        |             |             |                      |                |      |
|-----------------------------------------------------|--------------------------------------------------------|-------------|-------------|----------------------|----------------|------|
|                                                     | +                                                      | 597         | antisense   | ARF4 antisense RNA 1 |                |      |
| [Source:HGNC Symbol;Acc:HGNC:51593]                 | -                                                      | 0           | 15          | 6                    |                |      |
| 0                                                   | 0                                                      | 0           | 0           | 1.107773281          | 0.465563983    |      |
| 0                                                   | 0                                                      | 0           |             |                      |                |      |
| ENSG00000171763                                     | 433.8606284                                            | 505.1883718 | 466.4098445 |                      |                |      |
| 647.9529532                                         | 550.1436462                                            | 630.921579  | 468.4862816 |                      |                |      |
| 609.6727261                                         | -0.379085624                                           | 0.042982608 | 0.169671412 |                      |                |      |
| SPATA5L1                                            | 15                                                     | 45402331    | 45421419    | +                    | 3406           |      |
| protein_coding                                      | spermatogenesis associated 5 like 1                    |             |             |                      |                |      |
| [Source:HGNC Symbol;Acc:HGNC:28762]                 | -                                                      | 375         | 545         | 477                  |                |      |
| 645                                                 | 602                                                    | 643         | 6.021176207 | 7.054818037          |                |      |
| 6.487482379                                         | 9.156221442                                            | 7.70212292  | 8.812768565 |                      |                |      |
| ENSG00000223656                                     | 9.255693406                                            | 25.95463194 | 6.844588913 |                      |                |      |
| 23.10529911                                         | 80.41966921                                            | 25.51160351 | 14.01830475 |                      |                |      |
| 43.01219061                                         | -1.611870988                                           | 0.04298668  | 0.169671412 |                      |                |      |
| HMGB3P10                                            | 1                                                      | 99698242    | 99699178    | +                    | 572            |      |
| processed_pseudogene                                | high mobility group box 3 pseudogene                   |             |             |                      |                |      |
| 10 [Source:HGNC Symbol;Acc:HGNC:39302]              | -                                                      | 8           | 28          | 7                    |                |      |
| 23                                                  | 88                                                     | 26          | 0.764871838 | 2.158221231          |                |      |
| 0.566897402                                         | 1.944164567                                            | 6.704173439 | 2.121892389 |                      |                |      |
| ENSG00000136695                                     | 71.73162389                                            | 260.4732706 | 18.57816991 |                      |                |      |
| 369.6847857                                         | 1156.946605                                            | 231.5668626 | 116.9276881 |                      |                |      |
| 586.0660844                                         | -2.324945605                                           | 0.043005362 | 0.169701334 | IL36RN               |                |      |
| 2                                                   | 113058638                                              | 113065382   | +           | 3299                 |                |      |
| protein_coding                                      | interleukin 36 receptor antagonist [Source:HGNC        |             |             |                      |                |      |
| Symbol;Acc:HGNC:15561]                              | -                                                      | 62          | 281         | 19                   | 368            | 1266 |
| 236                                                 | 1.027789287                                            | 3.755415222 | 0.266792577 |                      |                |      |
| 5.393450778                                         | 16.7228382                                             | 3.339455982 |             |                      |                |      |
| ENSG00000120992                                     | 3050.907939                                            | 2458.274426 | 2620.499755 |                      |                |      |
| 1976.005363                                         | 2302.926891                                            | 2351.9736   | 2709.89404  |                      |                |      |
| 2210.301951                                         | 0.293597771                                            | 0.043023278 | 0.169704948 | LYPLA1               |                |      |
| 8                                                   | 54046367                                               | 54102017    | -           | 4694                 |                |      |
| protein_coding                                      | lysophospholipase I [Source:HGNC Symbol;Acc:HGNC:6737] |             |             |                      |                |      |
| -                                                   | 2637                                                   | 2652        | 2680        | 1967                 | 2520           | 2397 |
| 30.72286817                                         | 24.90946457                                            | 26.44808089 | 20.26107533 |                      |                |      |
| 23.39462312                                         | 23.83806417                                            |             |             |                      |                |      |
| ENSG00000171105                                     | 185.1138681                                            | 241.0072966 | 223.9158373 |                      |                |      |
| 260.1857595                                         | 325.3341164                                            | 339.5005697 | 216.6790007 |                      |                |      |
| 308.3401485                                         | -0.507701835                                           | 0.04302848  | 0.169704948 | INSR                 |                |      |
| 19                                                  | 7112255                                                | 7294034     | -           | 10451                | protein_coding |      |
| insulin receptor [Source:HGNC Symbol;Acc:HGNC:6091] | -                                                      |             |             |                      |                | 160  |
| 260                                                 | 229                                                    | 259         | 356         | 346                  | 0.837253261    |      |
| 1.096855603                                         | 1.015032833                                            | 1.198238123 | 1.484399324 |                      |                |      |
| 1.545483194                                         |                                                        |             |             |                      |                |      |
| ENSG00000158092                                     | 557.6555277                                            | 501.4805672 | 592.5458402 |                      |                |      |
| 653.9804225                                         | 748.4512396                                            | 717.2685447 | 550.560645  |                      |                |      |
| 706.5667356                                         | -0.360356943                                           | 0.043044428 | 0.169715141 | NCK1                 |                |      |
| 3                                                   | 136862208                                              | 136949823   | +           | 3727                 |                |      |
| protein_coding                                      | NCK adaptor protein 1 [Source:HGNC                     |             |             |                      |                |      |
| Symbol;Acc:HGNC:7664]                               | -                                                      | 482         | 541         | 606                  | 651            | 819  |

|                                           |                                                        |             |             |                |             |
|-------------------------------------------|--------------------------------------------------------|-------------|-------------|----------------|-------------|
| 731                                       | 7.072653115                                            | 6.399879992 | 7.532093235 |                |             |
| 8.445450335                               | 9.575977275                                            | 9.155962811 |             |                |             |
| ENSG00000166167                           | 584.2656462                                            | 539.485564  | 465.4320461 |                |             |
| 692.154395                                | 651.5820926                                            | 706.475174  | 529.7277521 |                |             |
| 683.4038872                               | -0.368039215                                           | 0.043053269 | 0.169715141 | BTRC           |             |
| 10                                        | 101354033                                              | 101557321   | + 6613      |                |             |
| protein_coding                            | beta-transducin repeat containing E3 ubiquitin protein |             |             |                |             |
| ligase [Source:HGNC Symbol;Acc:HGNC:1144] |                                                        |             | - 505       | 582            |             |
| 476                                       | 689                                                    | 713         | 720         | 4.176260381    | 3.880238495 |
| 3.334347704                               | 5.037579532                                            | 4.698395857 | 5.082530688 |                |             |
| ENSG00000221867                           | 1867.336145                                            | 2064.320191 | 2236.224978 |                |             |
| 2658.113975                               | 2343.136726                                            | 2485.418911 | 2055.960438 |                |             |
| 2495.556537                               | -0.279188252                                           | 0.043090907 | 0.169819722 | MAGEA3         |             |
| X                                         | 152698752                                              | 152702347   | + 1788      |                |             |
| protein_coding                            | MAGE family member A3 [Source:HGNC                     |             |             |                |             |
| Symbol;Acc:HGNC:6801]                     | -                                                      | 1614        | 2227        | 2287           | 2646        |
| 2533                                      | 49.36631711                                            | 54.91445282 | 59.25173966 | 2564           |             |
| 71.55229068                               | 62.4897956                                             | 66.13231279 |             |                |             |
| ENSG00000123815                           | 494.0226355                                            | 676.6743328 | 613.0796069 |                |             |
| 610.783559                                | 839.8372273                                            | 948.8354073 | 594.5921918 |                |             |
| 799.8187312                               | -0.4270115                                             | 0.043142679 | 0.16993664  | COQ8B          |             |
| 19                                        | 40691529                                               | 40718207    | - 5488      |                |             |
| protein_coding                            | coenzyme Q8B [Source:HGNC Symbol;Acc:HGNC:19041]       |             |             |                |             |
| -                                         | 427                                                    | 730         | 627         | 608            | 919         |
| 4.255087401                               | 5.864658328                                            | 5.2924394   | 5.356618206 |                |             |
| 7.297263126                               | 8.225426144                                            |             |             |                |             |
| ENSG00000160293                           | 629.3871516                                            | 749.9034729 | 785.1721282 |                |             |
| 456.0785128                               | 554.7129456                                            | 633.8652256 | 721.4875842 |                |             |
| 548.2188947                               | 0.396673245                                            | 0.043142808 | 0.16993664  | VAV2           |             |
| 9                                         | 133761894                                              | 133992604   | - 5682      |                |             |
| protein_coding                            | vav guanine nucleotide exchange factor 2 [Source:HGNC  |             |             |                |             |
| Symbol;Acc:HGNC:12658]                    | -                                                      | 544         | 809         | 803            | 454         |
| 646                                       | 5.235912534                                            | 6.277420917 | 6.546614555 | 607            |             |
| 3.863276924                               | 4.6552827                                              | 5.30734506  |             |                |             |
| ENSG00000177600                           | 9411.883232                                            | 9536.473337 | 10085.99066 |                |             |
| 10006.60367                               | 11394.91881                                            | 13890.08689 | 9678.115744 |                |             |
| 11763.86979                               | -0.281553923                                           | 0.043176333 | 0.170024885 | RPLP2          |             |
| 11                                        | 809647                                                 | 812880      | + 1955      | protein_coding |             |
| ribosomal protein lateral stalk           | subunit P2 [Source:HGNC                                |             |             |                |             |
| Symbol;Acc:HGNC:10377]                    | -                                                      | 8135        | 10288       | 10315          | 9961        |
| 14156                                     | 227.5650214                                            | 232.0161157 | 244.4133515 | 12469          |             |
| 246.3527388                               | 277.9351412                                            | 338.0180002 |             |                |             |
| ENSG00000082258                           | 888.5465669                                            | 667.4048214 | 688.370085  |                |             |
| 616.8110283                               | 545.5743468                                            | 561.2552771 | 748.1071578 |                |             |
| 574.5468841                               | 0.379995905                                            | 0.043229413 | 0.170190068 | CCNT2          |             |
| 2                                         | 134918235                                              | 134959342   | + 9081      |                |             |
| protein_coding                            | cyclin T2 [Source:HGNC Symbol;Acc:HGNC:1600]           |             |             |                |             |
| 768                                       | 720                                                    | 704         | 614         | 597            | 572         |
| 3.495688926                               | 3.591215272                                            | 3.269158009 | 2.864832621 |                |             |
| 2.940413371                               |                                                        |             |             |                |             |

|                                     |                                                     |                |                              |                |             |            |
|-------------------------------------|-----------------------------------------------------|----------------|------------------------------|----------------|-------------|------------|
| ENSG00000184500                     | 1015.812351                                         | 1028.915766    | 1015.932554                  |                |             |            |
| 623.8430759                         | 855.3728453                                         | 897.8122003    | 1020.220224                  |                |             |            |
| 792.3427072                         | 0.364442238                                         | 0.043246832    | 0.170214808                  | PROS1          |             |            |
| 3                                   | 93873033                                            | 93980003       | -                            | 5444           |             |            |
| protein_coding                      | protein S [Source:HGNC Symbol;Acc:HGNC:9456]        |                |                              |                |             | -          |
| 878                                 | 1110                                                | 1039           | 621                          | 936            | 915         | 8.82005132 |
|                                     | 8.989567965                                         | 8.840969388    | 5.515370605                  | 7.492320206    |             |            |
|                                     | 7.846012819                                         |                |                              |                |             |            |
| ENSG00000261693                     | 0                                                   | 0              | 0                            | 18.082408      | 2.741579632 |            |
| 0                                   | 0                                                   | 6.94132921     | -5.213621073                 | 0.043285872    |             |            |
| 1                                   | AC134682.1                                          | 8              | 142403652                    | 142407028      |             |            |
| +                                   | 3377                                                | antisense      | "novel transcript, antisense |                |             |            |
| to TSNARE1"                         | -                                                   | 0              | 0                            | 0              | 18          | 3          |
| 0                                   | 0                                                   | 0              | 0.257716759                  | 0.038712284    | 0           |            |
| ENSG00000118156                     | 6.941770054                                         | 3.707804563    | 5.866790497                  | 0              |             |            |
| 0                                   | 0                                                   | 5.505455038    | 0                            | 4.952144964    |             |            |
| 0.043292821                         | 1                                                   | ZNF541         | 19                           | 47520685       | 47555856    |            |
| -                                   | 4655                                                | protein_coding | zinc finger protein 541      |                |             |            |
| [Source:HGNC Symbol;Acc:HGNC:25294] |                                                     | zf-C2H2        | 6                            | 4              | 6           |            |
| 0                                   | 0                                                   | 0              | 0.0704898                    | 0.037885608    |             |            |
| 0.059708206                         | 0                                                   | 0              | 0                            |                |             |            |
| ENSG00000063322                     | 1883.533608                                         | 1740.814243    | 1738.525584                  |                |             |            |
| 2119.660048                         | 2378.777261                                         | 2009.529384    | 1787.624478                  |                |             |            |
| 2169.322231                         | -0.279526546                                        | 0.043302288    | 0.170389207                  | MED29          |             |            |
| 19                                  | 39391303                                            | 39400637       | +                            | 3835           |             |            |
| protein_coding                      | mediator complex subunit 29 [Source:HGNC            |                |                              |                |             |            |
| Symbol;Acc:HGNC:23074]              | -                                                   | 1628           | 1878                         | 1778           | 2110        | 2603       |
| 2048                                | 23.21580488                                         | 21.59057346    | 21.47676396                  |                |             |            |
| 26.6022459                          | 29.57790417                                         | 24.92933076    |                              |                |             |            |
| ENSG00000144199                     | 0                                                   | 0              | 1.955596832                  | 5.02289111     |             |            |
| 10.05245865                         | 12.75580175                                         | 0.651865611    |                              |                |             |            |
| 9.277050505                         | -3.805701314                                        | 0.043318771    | 1                            | FAHD2B         | 2           |            |
| 97083583                            | 97094882                                            | -              | 2662                         | protein_coding |             |            |
|                                     | fumarylacetoacetate hydrolase domain containing 2B  |                |                              |                |             |            |
| [Source:HGNC Symbol;Acc:HGNC:25318] | -                                                   | 0              | 0                            | 2              |             |            |
| 5                                   | 11                                                  | 13             | 0                            | 0              | 0.034803619 |            |
| 0.090816167                         | 0.180070774                                         | 0.22797191     |                              |                |             |            |
| ENSG00000115233                     | 3526.419188                                         | 2791.049885    | 2700.679225                  |                |             |            |
| 2418.01978                          | 2414.417796                                         | 2531.53604     | 3006.049433                  |                |             |            |
| 2454.657872                         | 0.291987959                                         | 0.043336453    | 0.17047423                   | PSMD14         |             |            |
| 2                                   | 161308038                                           | 161411717      | +                            | 7698           |             |            |
| protein_coding                      | "proteasome 26S subunit, non-ATPase 14 [Source:HGNC |                |                              |                |             |            |
| Symbol;Acc:HGNC:16889]"             | -                                                   | 3048           | 3011                         | 2762           | 2407        | 2642       |
| 2580                                | 21.6536827                                          | 17.24514327    | 16.62065839                  |                |             |            |
| 15.11817611                         | 14.95593277                                         | 15.64544193    |                              |                |             |            |
| ENSG00000273472                     | 0                                                   | 21.31987624    | 5.866790497                  | 33.15108133    |             |            |
|                                     | 39.29597473                                         | 33.36132766    | 9.062222245                  | 35.26946124    |             |            |
|                                     | -1.942537147                                        | 0.043363551    | 0.17047423                   | AC096733.2     |             |            |
| 4                                   | 140756528                                           | 140757921      | +                            | 1394           |             |            |
| lincRNA                             | novel transcript                                    |                |                              |                |             |            |
|                                     |                                                     | -              | 0                            | 23             | 6           | 33         |

|                                     |                                                     |           |             |             |                   |
|-------------------------------------|-----------------------------------------------------|-----------|-------------|-------------|-------------------|
| 43                                  | 34                                                  | 0         | 0.727443086 | 0.199384288 |                   |
| 1.144596418                         | 1.344201202                                         |           | 1.138576404 |             |                   |
| ENSG00000106052                     | 5182.031346                                         |           | 4236.166714 | 4354.136347 |                   |
| 4256.397927                         | 3780.638313                                         |           | 3108.490766 | 4590.778135 |                   |
| 3715.175668                         | 0.305153429                                         |           | 0.043364833 | 0.17047423  |                   |
| TAX1BP1                             | 7                                                   | 27739331  | 27844564    | +           | 9165              |
| protein_coding                      | Tax1 binding protein 1 [Source:HGNC                 |           |             |             |                   |
| Symbol;Acc:HGNC:11575]              | -                                                   | 4479      | 4570        | 4453        | 4237 4137         |
| 3168                                | 26.72657489                                         |           | 21.98455548 | 22.50726279 |                   |
| 22.35255701                         | 19.67033015                                         |           | 16.13610605 |             |                   |
| ENSG00000164924                     | 24554.19764                                         |           | 21526.58634 | 22072.82145 |                   |
| 18581.68337                         | 20721.77272                                         |           | 18441.94569 | 22717.86848 |                   |
| 19248.46726                         | 0.239033061                                         |           | 0.043371435 | 0.17047423  | YWHAZ             |
| 8                                   | 100916525                                           |           | 100953388   | -           | 8555              |
| protein_coding                      | tyrosine 3-monooxygenase/tryptophan 5-monooxygenase |           |             |             |                   |
| activation protein zeta             | [Source:HGNC Symbol;Acc:HGNC:12855]                 |           |             |             |                   |
| 21223                               | 23223                                               | 22574     | 18497       | 22675       | 18795 135.6692652 |
| 119.6829447                         | 122.2337013                                         |           | 104.5400008 | 115.501036  |                   |
| 102.5577187                         |                                                     |           |             |             |                   |
| ENSG00000232888                     | 26.61011854                                         |           | 13.90426711 | 37.15633981 |                   |
| 59.2701151                          | 49.34843338                                         |           | 65.7414398  | 25.89024182 |                   |
| 58.11999609                         | -1.168376084                                        |           | 0.043389343 | 0.17047423  |                   |
| RPS11P5                             | 12                                                  | 132825701 | 132826184   | +           | 484               |
| processed_pseudogene                | ribosomal protein S11 pseudogene 5                  |           |             |             |                   |
| [Source:HGNC Symbol;Acc:HGNC:36312] | -                                                   |           |             | 23          | 15 38             |
| 59                                  | 54                                                  | 67        | 2.598825905 | 1.366406299 |                   |
| 3.63697814                          | 5.89396926                                          |           | 4.861910903 | 6.462126821 |                   |
| ENSG00000198832                     | 201.3113316                                         |           | 223.3952249 | 267.916766  |                   |
| 199.9110662                         | 493.4843338                                         |           | 376.7867595 | 230.8744408 |                   |
| 356.7273865                         | -0.627796559                                        |           | 0.043390804 | 0.17047423  |                   |
| SELENOM                             | 22                                                  | 31104772  | 31120069    | -           | 3187              |
| protein_coding                      | selenoprotein M [Source:HGNC Symbol;Acc:HGNC:30397] |           |             |             |                   |
| -                                   | 174                                                 | 241       | 274         | 199         | 540 384           |
| 2.985808139                         | 3.334025653                                         |           | 3.982639118 | 3.019063373 |                   |
| 7.383636263                         | 5.624646031                                         |           |             |             |                   |
| ENSG00000108506                     | 1047.050317                                         |           | 830.5482222 | 817.4394759 |                   |
| 757.4519794                         | 658.8929716                                         |           | 686.8508636 | 898.3460049 |                   |
| 701.0652716                         | 0.357104076                                         |           | 0.043442023 | 0.170631603 | INTS2             |
| 17                                  | 61865367                                            |           | 61928016    | -           | 8627              |
| protein_coding                      | integrator complex subunit 2 [Source:HGNC           |           |             |             |                   |
| Symbol;Acc:HGNC:29241]              | -                                                   | 905       | 896         | 836         | 754 721           |
| 700                                 | 5.736982088                                         |           | 4.579121527 | 4.488993073 |                   |
| 4.225837224                         | 3.641950715                                         |           | 3.787775912 |             |                   |
| ENSG00000144158                     | 75.20250892                                         |           | 69.52133556 | 115.3802131 |                   |
| 37.16939421                         | 29.24351608                                         |           | 64.76022428 | 86.70135253 |                   |
| 43.72437819                         | 0.989229667                                         |           | 0.043501255 | 0.170820365 |                   |
| AL078621.1                          | 2                                                   | 113657908 | 113658675   | +           | 768               |
| processed_pseudogene                | small nuclear ribonucleoprotein                     |           |             |             |                   |
| polypeptide A' (SNRPA1)             | pseudogene                                          |           |             |             |                   |
| 37                                  | 32                                                  | 66        | 4.628570141 | 4.305603182 | 118               |

|                                     |                     |                |                       |              |                |
|-------------------------------------|---------------------|----------------|-----------------------|--------------|----------------|
| 7.117430631                         | 2.329387392         | 1.81571364     | 4.011702798           |              |                |
| ENSG00000229567                     | 8.09873173          | 5.561706845    | 2.933395248           | 0            |                |
| 0                                   | 0                   | 5.531277941    | 0                     | 4.958424494  |                |
| 0.043517212                         | 1                   | AL139421.1     | 1                     | 93278961     |                |
| 93279129                            | -                   | 169            | processed_pseudogene  | ribosomal    |                |
| protein L39 (RPL39)                 | pseudogene          | -              | 7                     | 6            | 3              |
| 0                                   | 0                   | 2.265197367    | 1.56530331            | 0.822312716  | 0              |
| 0                                   | 0                   | 0              |                       |              |                |
| ENSG00000230601                     | 2.313923351         | 12.97731597    | 1.955596832           | 0            |                |
| 0                                   | 0                   | 5.748945385    | 0                     | 5.020211153  |                |
| 0.043533972                         | 1                   | TEX48          | 9                     | 114666434    | 114682066      |
| -                                   | 708                 | protein_coding | testis expressed      | 48           |                |
| [Source:HGNC Symbol;Acc:HGNC:52393] | -                   | 2              | 14                    | 2            |                |
| 0                                   | 0                   | 0              | 0.154486826           | 0.871823831  |                |
| 0.130857673                         | 0                   | 0              | 0                     |              |                |
| ENSG00000090266                     | 598.1491863         | 755.4651798    | 814.5060807           |              |                |
| 355.6206906                         | 523.6417098         | 676.0574929    | 722.7068156           |              |                |
| 518.4399644                         | 0.479596021         | 0.043536354    | 0.17091429            |              | NDUFB2         |
| 7                                   | 140690777           | 140722790      | +                     | 4447         |                |
| protein_coding                      | NADH:ubiquinone     | oxidoreductase | subunit B2            | [Source:HGNC |                |
| Symbol;Acc:HGNC:7697]               | -                   | 517            | 815                   | 833          | 354            |
| 689                                 | 6.357964906         | 8.08024329     | 8.677214389           | 573          |                |
| 3.848906394                         | 5.614952546         | 7.232661307    |                       |              |                |
| ENSG00000185722                     | 2422.677749         | 2426.758087    | 2939.262039           |              |                |
| 2279.387986                         | 1909.967144         | 2167.505083    | 2596.232625           |              |                |
| 2118.953404                         | 0.29329788          | 0.043628107    | 0.171215951           |              | ANKFY1         |
| 17                                  | 4163907             | 4263995        | -                     | 14138        | protein_coding |
| ankyrin repeat and FYVE domain      | containing 1        | [Source:HGNC   |                       |              |                |
| Symbol;Acc:HGNC:20763]              | -                   | 2094           | 2618                  | 3006         | 2269           |
| 2209                                | 8.099970044         | 8.164237366    | 9.849256658           | 2090         |                |
| 7.759750098                         | 6.441943427         | 7.293798721    |                       |              |                |
| ENSG00000092140                     | 800.6174796         | 769.3694469    | 798.861306            |              |                |
| 639.9163274                         | 656.151392          | 579.898372     | 789.6160775           |              |                |
| 625.3220305                         | 0.336329326         | 0.043642239    | 0.171215951           |              | G2E3           |
| 14                                  | 30559123            | 30620063       | +                     | 9353         |                |
| protein_coding                      | G2/M-phase specific | E3 ubiquitin   | protein ligase        |              |                |
| [Source:HGNC Symbol;Acc:HGNC:20338] | -                   | 692            | 830                   | 817          |                |
| 637                                 | 718                 | 591            | 4.046223544           | 3.912560949  |                |
| 4.046444406                         | 3.292984712         | 3.345277177    | 2.949732154           |              |                |
| ENSG00000136731                     | 2625.146042         | 2182.969937    | 3430.116844           |              |                |
| 2368.795448                         | 1754.610965         | 2267.589065    | 2746.077608           |              |                |
| 2130.331826                         | 0.366412547         | 0.043646795    | 0.171215951           |              | UGGT1          |
| 2                                   | 128091200           | 128195677      | +                     | 11349        |                |
| protein_coding                      | UDP-glucose         | glycoprotein   | glucosyltransferase 1 |              |                |
| [Source:HGNC Symbol;Acc:HGNC:15663] | -                   | 2269           | 2355                  | 3508         |                |
| 2358                                | 1920                | 2311           | 10.93381226           | 9.148866142  |                |
| 14.31872817                         | 10.04586693         | 7.372286943    | 9.505793712           |              |                |
| ENSG00000219294                     | 16.19746346         | 0              | 3.911193665           | 0            | 0              |
| 0                                   | 6.702885708         | 0              | 5.232086079           | 0.043662489  |                |
| 1                                   | PIP5K1P1            | 6              | 7986537               | 7988192      | +              |
|                                     |                     |                |                       |              | 1656           |



|                 |                                                                |                                                     |                                     |             |            |                  |             |
|-----------------|----------------------------------------------------------------|-----------------------------------------------------|-------------------------------------|-------------|------------|------------------|-------------|
|                 | processed_pseudogene                                           |                                                     | phosphatidylinositol-4-phosphate 5- |             |            |                  |             |
|                 | kinase type 1 pseudogene 1 [Source:HGNC Symbol;Acc:HGNC:28372] |                                                     | -                                   |             |            |                  |             |
|                 | 14                                                             | 0                                                   | 4                                   | 0           | 0          | 0                | 0.462341008 |
|                 | 0                                                              | 0.111892793                                         |                                     | 0           | 0          | 0                |             |
| ENSG00000174891 | 1248.361648                                                    |                                                     |                                     | 851.8680984 |            | 1086.33404       |             |
| 873.9830532     | 882.7886416                                                    |                                                     |                                     | 679.0011395 |            | 1062.187929      |             |
| 811.9242781     | 0.386819233                                                    |                                                     |                                     | 0.043670389 |            | 0.171264556      | RSRC1       |
|                 | 3                                                              | 158105855                                           |                                     | 158545730   |            | + 5117           |             |
|                 | protein_coding                                                 | arginine and serine rich coiled-coil 1 [Source:HGNC |                                     |             |            |                  |             |
|                 | Symbol;Acc:HGNC:24152]                                         | -                                                   |                                     | 1079        | 919        | 1111             | 870 966     |
|                 | 692                                                            | 11.53189662                                         |                                     | 7.918338299 |            | 10.05775605      |             |
| 8.220629064     | 8.226598598                                                    |                                                     |                                     | 6.313013431 |            |                  |             |
| ENSG00000154978 | 2244.505651                                                    |                                                     |                                     | 2728.017208 |            | 2579.432222      |             |
| 2773.640471     | 3321.880654                                                    |                                                     |                                     | 3096.716179 |            | 2517.31836       |             |
| 3064.079102     | -0.283336797                                                   |                                                     |                                     | 0.043688582 |            | 0.171291961      | VOPP1       |
|                 | 7                                                              | 55436056                                            |                                     | 55572988    |            | - 5364           |             |
|                 | protein_coding                                                 | "VOPP1, WBP1/VOPP1 family member [Source:HGNC       |                                     |             |            |                  |             |
|                 | Symbol;Acc:HGNC:34518]"                                        | -                                                   |                                     | 1940        | 2943       | 2638             | 2761 3635   |
|                 | 3156                                                           | 19.77915225                                         |                                     | 24.18997675 |            | 22.78182324      |             |
| 24.88736137     | 29.53073414                                                    |                                                     |                                     | 27.46592698 |            |                  |             |
| ENSG00000108785 | 111.0683209                                                    |                                                     |                                     | 130.7001109 |            | 152.5365529      |             |
| 207.947692      | 137.9928415                                                    |                                                     |                                     | 285.5337162 |            | 131.4349949      |             |
| 210.4914165     | -0.677554167                                                   |                                                     |                                     | 0.04374745  |            | 0.17142509       |             |
| HSD17B1P1       | 17                                                             | 42546764                                            |                                     | 42548706    |            | + 955            |             |
|                 | unprocessed_pseudogene                                         | hydroxysteroid 17-beta dehydrogenase 1              |                                     |             |            |                  |             |
|                 | pseudogene 1 [Source:HGNC Symbol;Acc:HGNC:5216]                | -                                                   |                                     |             |            | 96               | 141         |
|                 | 156                                                            | 207                                                 | 151                                 | 291         | 5.49746628 | 6.509530992      |             |
|                 | 7.566999105                                                    | 10.48016669                                         |                                     | 6.890205477 |            | 14.22445557      |             |
| ENSG00000235427 | 2.313923351                                                    |                                                     |                                     | 5.561706845 |            | 8.800185745      | 0           |
|                 | 0                                                              | 0                                                   | 5.558605314                         | 0           |            | 4.970211452      |             |
| 0.043750088     | 1                                                              | AC006159.1                                          |                                     | 7           |            | 116542718        |             |
| 116551969       | -                                                              | 386                                                 |                                     | antisense   |            | novel transcript |             |
|                 | -                                                              | 2                                                   | 6                                   | 9           | 0          | 0                | 0           |
| 0.283359256     | 0.685327097                                                    |                                                     |                                     | 1.080084318 |            | 0                | 0 0         |
| ENSG00000172037 | 2268.801846                                                    |                                                     |                                     | 2050.415924 |            | 3144.599706      |             |
| 1768.057671     | 1233.710835                                                    |                                                     |                                     | 2470.700678 |            | 2487.939159      |             |
| 1824.156394     | 0.447914699                                                    |                                                     |                                     | 0.043762085 |            | 0.17142509       | LAMB2       |
|                 | 3                                                              | 49121114                                            |                                     | 49133118    |            | - 6865           |             |
|                 | protein_coding                                                 | laminin subunit beta 2 [Source:HGNC                 |                                     |             |            |                  |             |
|                 | Symbol;Acc:HGNC:6487]                                          | -                                                   |                                     | 1961        | 2212       | 3216             | 1760 1350   |
|                 | 2518                                                           | 15.62182487                                         |                                     | 14.2062201  |            | 21.70091042      |             |
| 12.39576524     | 8.569427812                                                    |                                                     |                                     | 17.12226523 |            |                  |             |
| ENSG00000129219 | 691.8630821                                                    |                                                     |                                     | 715.6062807 |            | 798.861306       |             |
| 586.6736817     | 489.8288943                                                    |                                                     |                                     | 630.921579  |            | 735.4435563      |             |
| 569.141385      | 0.370425381                                                    |                                                     |                                     | 0.043766558 |            | 0.17142509       | PLD2        |
|                 | 17                                                             | 4807096                                             | 4823434                             | + 4888      |            | protein_coding   |             |
|                 | phospholipase D2 [Source:HGNC Symbol;Acc:HGNC:9068]            |                                                     |                                     |             |            | -                | 598         |
|                 | 772                                                            | 817                                                 | 584                                 | 536         | 643        | 6.690594351      |             |
| 6.963379443     | 7.742715738                                                    |                                                     |                                     | 5.776740601 |            | 4.7785066        |             |
| 6.140812138     |                                                                |                                                     |                                     |             |            |                  |             |

|                                      |                                                        |             |                |             |             |
|--------------------------------------|--------------------------------------------------------|-------------|----------------|-------------|-------------|
| ENSG00000118402                      | 70.57466222                                            | 38.93194792 | 60.6235018     |             |             |
| 136.6226382                          | 107.8354655                                            | 70.6475174  | 56.71003731    |             |             |
| 105.035207                           | -0.892501098                                           | 0.043771804 | 0.17142509     | ELOVL4      |             |
| 6                                    | 79914812                                               | 79947580    | -              | 3042        |             |
| protein_coding                       | ELOVL fatty acid elongase 4 [Source:HGNC               |             |                |             |             |
| Symbol;Acc:HGNC:14415]               | -                                                      | 61          | 42             | 62          | 136         |
| 72                                   | 1.09664317                                             | 0.608729065 | 0.944136822    |             | 118         |
| 2.161627791                          | 1.690368517                                            | 1.104890711 |                |             |             |
| ENSG00000234072                      | 175.8581747                                            | 177.0476679 | 155.4699482    |             |             |
| 240.0941951                          | 239.4312879                                            | 249.2287419 | 169.4585969    |             |             |
| 242.918075                           | -0.519761558                                           | 0.043778606 | 0.17142509     |             |             |
| AC074117.1                           | 2                                                      | 27356246    | 27367622       | +           | 3412        |
| antisense                            | uncharacterized LOC105374363 [Source:NCBI              |             |                |             |             |
| gene;Acc:105374363]                  | -                                                      | 152         | 191            | 159         | 239         |
| 254                                  | 2.436291658                                            | 2.468074715 | 2.158691382    |             | 262         |
| 3.386804241                          | 3.346192077                                            | 3.475127394 |                |             |             |
| ENSG00000197124                      | 8.09873173                                             | 4.634755704 | 7.822387329    |             |             |
| 1.004578222                          | 0                                                      | 0           | 6.851958255    | 0.334859407 |             |
| 4.306174161                          | 0.043817694                                            | 1           | ZNF682         | 19          | 19997058    |
| 20039506                             | -                                                      | 4968        | protein_coding | zinc finger |             |
| protein                              | 682 [Source:HGNC Symbol;Acc:HGNC:28857] zf-C2H2        |             |                |             |             |
| 8                                    | 1                                                      | 0           | 0              | 0.077056835 | 0.044373366 |
|                                      | 0.074595195                                            | 0.009732393 | 0              | 0           |             |
| ENSG00000130304                      | 601.6200714                                            | 787.9084697 | 823.3062664    |             |             |
| 914.166182                           | 860.8560045                                            | 1100.923813 | 737.6116025    |             |             |
| 958.6486665                          | -0.377093021                                           | 0.043855166 | 0.171680901    |             |             |
| SLC27A1                              | 19                                                     | 17468769    | 17506168       | +           | 8249        |
| protein_coding                       | solute carrier family 27 member 1 [Source:HGNC         |             |                |             |             |
| Symbol;Acc:HGNC:10995]               | -                                                      | 520         | 850            | 842         | 910         |
| 1122                                 | 3.447440289                                            | 4.543092507 | 4.728389494    |             | 942         |
| 5.333856227                          | 4.976318823                                            | 6.34947166  |                |             |             |
| ENSG00000176692                      | 411.8783566                                            | 485.7223978 | 705.9704565    |             |             |
| 420.918275                           | 286.9520015                                            | 420.9414579 | 534.5237369    |             |             |
| 376.2705781                          | 0.507722682                                            | 0.04389429  | 0.171702686    | FOXC2       |             |
| 16                                   | 86566829                                               | 86569728    | +              | 2900        |             |
| protein_coding                       | forkhead box C2 [Source:HGNC Symbol;Acc:HGNC:3801]     |             |                |             |             |
| Fork                                 | 356                                                    | 524         | 722            | 419         | 314         |
| 6.713464748                          | 7.966494251                                            | 11.5329831  | 6.985817593    |             |             |
| 4.718351031                          | 6.905662195                                            |             |                |             |             |
| ENSG0000012174                       | 802.9314029                                            | 724.8757921 | 716.726239     |             |             |
| 595.7148857                          | 603.1475191                                            | 572.0486479 | 748.1778114    |             |             |
| 590.3036842                          | 0.34141677                                             | 0.043894701 | 0.171702686    | MBTPS2      |             |
| X                                    | 21839636                                               | 21885424    | +              | 8927        |             |
| protein_coding                       | "membrane bound transcription factor peptidase, site 2 |             |                |             |             |
| [Source:HGNC Symbol;Acc:HGNC:15455]" | -                                                      | 694         | 782            | 733         |             |
| 593                                  | 660                                                    | 583         | 4.251563289    | 3.862203706 |             |
| 3.803653048                          | 3.211813913                                            | 3.221788289 | 3.048660444    |             |             |
| ENSG00000159228                      | 1361.743892                                            | 1515.565115 | 1279.938127    |             |             |
| 1764.039358                          | 1571.838989                                            | 1761.281857 | 1385.749045    |             |             |
| 1699.053401                          | -0.293777264                                           | 0.043895562 | 0.171702686    | CBR1        |             |

|                                                            |                                                      |                                     |           |                    |      |             |
|------------------------------------------------------------|------------------------------------------------------|-------------------------------------|-----------|--------------------|------|-------------|
| 21                                                         | 36069941                                             | 36073166                            | +         | 2450               |      |             |
| protein_coding                                             | carbonyl reductase 1 [Source:HGNC                    |                                     |           |                    |      |             |
| Symbol;Acc:HGNC:1548]                                      | -                                                    | 1177                                | 1635      | 1309               | 1756 | 1720        |
| 1795                                                       | 26.27272326                                          | 29.42291049                         |           | 24.75004643        |      |             |
| 34.65450052                                                | 30.59292206                                          | 34.20144099                         |           |                    |      |             |
| ENSG00000187800                                            | 2.313923351                                          | 6.488657986                         |           | 7.822387329        |      | 0           |
| 0                                                          | 0                                                    | 5.541656222                         | 0         | 4.966025667        |      |             |
| 0.04389857                                                 | 1                                                    | PEAR1                               | 1         | 156893698          |      | 156916434   |
| +                                                          | 5530                                                 | protein_coding platelet endothelial |           |                    |      |             |
| aggregation receptor 1 [Source:HGNC                        | Symbol;Acc:HGNC:33631]                               |                                     |           |                    |      | -           |
| 2                                                          | 7                                                    | 8                                   | 0         | 0                  | 0    | 0.019778784 |
| 0.055809337                                                | 0.067014273                                          | 0                                   | 0         | 0                  | 0    |             |
| ENSG00000279108                                            | 94.87085741                                          | 82.49865154                         |           | 61.60130022        |      |             |
| 135.61806                                                  | 137.9928415                                          | 120.6895089                         |           | 79.65693639        |      |             |
| 131.4334701                                                | -0.72458255                                          | 0.043905658                         |           | 0.171702686        |      |             |
| AC008537.3                                                 | 19                                                   | 40840159                            |           | 40842039           | +    | 1881        |
| TEC                                                        | TEC                                                  | -                                   | 82        | 89                 | 63   | 135         |
| 123                                                        | 2.384074209                                          | 2.086100221                         |           | 1.55150868         |      |             |
| 3.470133552                                                | 3.498217028                                          | 3.052546945                         |           |                    |      |             |
| ENSG00000170468                                            | 448.9011302                                          | 563.5862936                         |           | 509.4329748        |      |             |
| 583.659947                                                 | 820.6461699                                          | 619.1469928                         |           | 507.3067995        |      |             |
| 674.4843699                                                | -0.410532846                                         | 0.043973419                         |           | 0.171903369        |      | RIOX1       |
| 14                                                         | 73490964                                             | 73493392                            |           | +                  | 2429 |             |
| protein_coding                                             | ribosomal oxygenase 1 [Source:HGNC                   |                                     |           |                    |      |             |
| Symbol;Acc:HGNC:20968]                                     | -                                                    | 388                                 | 608       | 521                | 581  | 898         |
| 631                                                        | 8.735724387                                          | 11.03595758                         |           | 9.936024742        |      |             |
| 11.56511176                                                | 16.11044066                                          | 12.1268465                          |           |                    |      |             |
| ENSG00000073584                                            | 365.5998895                                          | 310.5286322                         |           | 358.8520187        |      |             |
| 278.2681675                                                | 171.805657                                           | 270.8154834                         |           | 344.9935135        |      |             |
| 240.2964359                                                | 0.522232951                                          | 0.043979465                         |           | 0.171903369        |      |             |
| SMARCE1                                                    | 17                                                   | 40624962                            |           | 40648864           | -    | 18680       |
| protein_coding                                             | "SWI/SNF related, matrix associated, actin dependent |                                     |           |                    |      |             |
| regulator of chromatin, subfamily e, member 1 [Source:HGNC | Symbol;Acc:HGNC:11109]" HMG                          |                                     |           |                    |      |             |
| 276                                                        | 0.925134599                                          | 0.790682075                         |           | 0.91010531         |      | 188         |
| 0.716975167                                                | 0.438570661                                          | 0.689728618                         |           |                    |      |             |
| ENSG00000143947                                            | 9138.840276                                          | 9400.211519                         |           | 9575.579889        |      |             |
| 6151.032453                                                | 8548.245293                                          | 8321.688821                         |           | 9371.543895        |      |             |
| 7673.655522                                                | 0.288336383                                          | 0.043996589                         |           | 0.171926346        |      | RPS27A      |
| 2                                                          | 55231903                                             | 55235853                            |           | +                  | 3130 |             |
| protein_coding                                             | ribosomal protein S27a [Source:HGNC                  |                                     |           |                    |      |             |
| Symbol;Acc:HGNC:10417]                                     | -                                                    | 7899                                | 10141     | 9793               | 6123 | 9354        |
| 8481                                                       | 138.0137922                                          | 142.8467629                         |           | 144.9351995        |      |             |
| 94.58475394                                                | 130.2301755                                          | 126.4878357                         |           |                    |      |             |
| ENSG00000227678                                            | 15.04050178                                          | 1.853902282                         |           | 0.977798416        |      | 0           |
| 0                                                          | 0                                                    | 5.957400827                         | 0         | 5.060715918        |      |             |
| 0.044017999                                                | 1                                                    | AL355581.1                          | 6         | 130133410          |      |             |
| 130146179                                                  | -                                                    | 2906                                | antisense | "novel transcript, |      |             |
| antisense to L3MBTL3"                                      | -                                                    | 13                                  | 2         | 1                  | 0    | 0           |
| 0                                                          | 0.244648442                                          | 0.030343687                         |           | 0.01594068         |      | 0           |

|                                              |                                                                                                          |                                 |              |                   |             |             |
|----------------------------------------------|----------------------------------------------------------------------------------------------------------|---------------------------------|--------------|-------------------|-------------|-------------|
| 0                                            | 0                                                                                                        |                                 |              |                   |             |             |
| ENSG00000260366                              | 2.313923351                                                                                              | 12.97731597                     | 5.866790497  | 0                 |             |             |
| 0                                            | 0.981215519                                                                                              | 7.052676607                     | 0.32707184   |                   |             |             |
| 4.353810868                                  | 0.044024017                                                                                              | 1                               | AC026803.1   | 19                |             |             |
| 48926171                                     | 48926444                                                                                                 | +                               | 274          | sense_overlapping |             |             |
|                                              | "novel transcript, overlapping NUCB1"                                                                    | -                               | 2            | 14                |             |             |
| 6                                            | 0                                                                                                        | 0                               | 1            | 0.399184937       | 2.252741869 |             |
|                                              | 1.014385759                                                                                              | 0                               | 0            | 0.170370922       |             |             |
| ENSG00000224805                              | 0                                                                                                        | 0.926951141                     | 0            | 7.032047554       |             |             |
| 9.138598774                                  | 4.906077597                                                                                              | 0.308983714                     |              |                   |             |             |
| 7.025574642                                  | -4.271253034                                                                                             | 0.044040113                     | 1            | LINC00853         |             |             |
| 1                                            | 47179250                                                                                                 | 47180339                        | +            | 661               |             |             |
| antisense                                    | long intergenic non-protein coding RNA                                                                   | 853                             |              |                   |             |             |
| [Source:HGNC Symbol;Acc:HGNC:43716]          |                                                                                                          | -                               | 0            | 1                 | 0           |             |
| 7                                            | 10                                                                                                       | 5                               | 0            | 0.066701024       | 0           |             |
| 0.512032818                                  | 0.659260626                                                                                              | 0.353113711                     |              |                   |             |             |
| ENSG00000110717                              | 2035.095588                                                                                              | 1883.564718                     | 2297.826278  |                   |             |             |
| 1845.410194                                  | 1562.70039                                                                                               | 1660.216659                     | 2072.162195  |                   |             |             |
| 1689.442414                                  | 0.294700371                                                                                              | 0.04409838                      | 0.172280076  | NDUFS8            |             |             |
| 11                                           | 68030617                                                                                                 | 68036644                        | +            | 4523              |             |             |
| protein_coding                               | NADH:ubiquinone oxidoreductase core subunit S8                                                           |                                 |              |                   |             |             |
| [Source:HGNC Symbol;Acc:HGNC:7715]           |                                                                                                          | -                               | 1759         | 2032              | 2350        |             |
| 1837                                         | 1710                                                                                                     | 1692                            | 21.26835812  | 19.80756427       |             |             |
| 24.06820657                                  | 19.63739089                                                                                              | 16.47510232                     | 17.46303831  |                   |             |             |
| ENSG00000253948                              | 9.255693406                                                                                              | 12.05036483                     | 15.64477466  |                   |             |             |
| 4.018312888                                  | 0                                                                                                        | 0                               | 12.3169443   | 1.339437629       |             |             |
| 3.221303069                                  | 0.044101024                                                                                              | 1                               | AC104986.2   | 8                 |             |             |
| 98996763                                     | 99013044                                                                                                 | -                               | 380          | lincRNA           |             |             |
| uncharacterized                              | LOC105375666 [Source:NCBI gene;Acc:105375666]                                                            | -                               |              |                   |             |             |
| 8                                            | 13                                                                                                       | 16                              | 4            | 0                 | 0           | 1.151333399 |
|                                              | 1.508320778                                                                                              | 1.950468055                     | 0.508952921  | 0                 | 0           |             |
| ENSG00000109794                              | 0                                                                                                        | 0                               | 0            | 0                 | 6.397019142 |             |
| 13.73701727                                  | 0                                                                                                        | 6.711345471                     | -5.166792955 | 0.04412584        |             |             |
| 1                                            | FAM149A                                                                                                  | 4                               | 186104419    | 186172667         | +           |             |
| 5218                                         | protein_coding                                                                                           | family with sequence similarity | 149          |                   |             |             |
| member A [Source:HGNC Symbol;Acc:HGNC:24527] |                                                                                                          | -                               | 0            | 0                 | 0           | 0           |
| 0                                            | 0                                                                                                        | 7                               | 14           | 0                 | 0           | 0           |
|                                              | 0.058459159                                                                                              | 0.125247768                     |              |                   |             |             |
| ENSG00000175711                              | 264.9442237                                                                                              | 255.8385149                     | 274.7613549  |                   |             |             |
| 177.8103453                                  | 149.8730199                                                                                              | 221.7547074                     | 265.1813645  |                   |             |             |
| 183.1460242                                  | 0.534516708                                                                                              | 0.044137933                     | 0.172390542  |                   |             |             |
| B3GNTL1                                      | 17                                                                                                       | 82942155                        | 83051810     | -                 | 6891        |             |
| protein_coding                               | "UDP-GlcNAc:betaGal beta-1,3-N-acetylglucosaminyltransferase like 1 [Source:HGNC Symbol;Acc:HGNC:21727]" | -                               | 229          | 276               | 281         | 177         |
| 226                                          | 1.81738921                                                                                               | 1.765878383                     | 1.888976373  |                   |             | 164         |
| 1.24191603                                   | 1.037098953                                                                                              | 1.530989545                     |              |                   |             |             |
| ENSG00000234718                              | 12.72657843                                                                                              | 3.707804563                     | 0.977798416  | 0                 |             |             |
| 0                                            | 0                                                                                                        | 5.804060471                     | 0            | 5.024580422       |             |             |
| 0.044157483                                  | 1                                                                                                        | AC007161.1                      | 7            | 7738524           | 7742574     | -           |

|                                                |                                                    |             |             |                    |                |             |
|------------------------------------------------|----------------------------------------------------|-------------|-------------|--------------------|----------------|-------------|
| 1496                                           | transcribed_processed_pseudogene                   | ribosomal   |             |                    |                |             |
| protein L23a (RPL23A)                          | pseudogene                                         | -           | 11          | 4                  | 1              |             |
| 0                                              | 0                                                  | 0           | 0.402120121 | 0.117886034        |                |             |
| 0.030964984                                    | 0                                                  | 0           | 0           |                    |                |             |
| ENSG00000256481                                | 12.72657843                                        | 3.707804563 | 0.977798416 | 0                  |                |             |
| 0                                              | 0                                                  | 5.804060471 | 0           | 5.024580422        |                |             |
| 0.044157483                                    | 1                                                  | AP006333.2  | 11          | 64081690           |                |             |
| 64087175                                       | +                                                  | 732         | antisense   | "novel transcript, |                |             |
| antisense to MACROD1"                          | -                                                  | 11          | 4           | 1                  | 0              | 0           |
| 0                                              | 0.821819263                                        | 0.240925555 | 0.063283629 | 0                  |                |             |
| 0                                              | 0                                                  |             |             |                    |                |             |
| ENSG00000222287                                | 2.313923351                                        | 3.707804563 | 23.46716199 | 0                  |                |             |
| 0                                              | 1.962431039                                        | 9.829629968 | 0.65414368  |                    |                |             |
| 3.921827271                                    | 0.044179446                                        | 1           | RNU6-1043P  | 16                 |                |             |
| 30701337                                       | 30701435                                           | -           | 99          | snRNA              | "RNA, U6 small |             |
| nuclear 1043,                                  | pseudogene [Source:HGNC Symbol;Acc:HGNC:48006]"    |             |             |                    |                | -           |
| 2                                              | 4                                                  | 24          | 0           | 0                  | 2              | 1.104814877 |
| 1.781388953                                    | 11.22996759                                        | 0           | 0           | 0.943063284        |                |             |
| ENSG00000126785                                | 315.8505375                                        | 176.1207168 | 290.4061296 |                    |                |             |
| 154.7050462                                    | 212.9293514                                        | 139.3326038 | 260.7924613 |                    |                |             |
| 168.9890005                                    | 0.623716712                                        | 0.044316222 | 0.172992426 |                    |                | RH0J        |
| 14                                             | 63204114                                           | 63293219    | +           | 3793               |                |             |
| protein_coding                                 | ras homolog family member J [Source:HGNC           |             |             |                    |                |             |
| Symbol;Acc:HGNC:688]                           | -                                                  | 273         | 190         | 297                | 154            | 233         |
| 142                                            | 3.936176073                                        | 2.208537187 | 3.627238082 |                    |                |             |
| 1.963084955                                    | 2.676897093                                        | 1.747638234 |             |                    |                |             |
| ENSG00000012963                                | 2239.877804                                        | 1882.637767 | 2017.198133 |                    |                |             |
| 1408.418667                                    | 1924.588902                                        | 1584.663064 | 2046.571235 |                    |                |             |
| 1639.223544                                    | 0.319683487                                        | 0.044324857 | 0.172992426 |                    |                | UBR7        |
| 14                                             | 93207056                                           | 93229215    | +           | 3694               |                |             |
| protein_coding                                 | ubiquitin protein ligase E3 component n-recognin 7 |             |             |                    |                |             |
| (putative) [Source:HGNC Symbol;Acc:HGNC:20344] | -                                                  |             |             | 1936               | 2031           |             |
| 2063                                           | 1402                                               | 2106        | 1615        | 28.66178109        | 24.24080234    |             |
| 25.87049823                                    | 18.35068748                                        | 24.84391722 | 20.40899745 |                    |                |             |
| ENSG00000105825                                | 401.4657015                                        | 827.7673688 | 359.8298171 |                    |                |             |
| 762.4748705                                    | 2108.274737                                        | 824.2210364 | 529.6876291 |                    |                |             |
| 1231.656881                                    | -1.217225215                                       | 0.044328277 | 0.172992426 |                    |                | TFPI2       |
| 7                                              | 93885396                                           | 93890991    | -           | 2682               |                |             |
| protein_coding                                 | tissue factor pathway inhibitor 2 [Source:HGNC     |             |             |                    |                |             |
| Symbol;Acc:HGNC:11761]                         | -                                                  | 347         | 893         | 368                | 759            | 2307        |
| 840                                            | 7.075634878                                        | 14.68001987 | 6.356111411 |                    |                |             |
| 13.68309111                                    | 37.48412856                                        | 14.62064554 |             |                    |                |             |
| ENSG00000172575                                | 8.09873173                                         | 5.561706845 | 10.75578258 |                    |                |             |
| 51.23348932                                    | 30.15737595                                        | 6.868508636 | 8.138740384 |                    |                |             |
| 29.4197913                                     | -1.854863785                                       | 0.044337301 | 0.172992426 |                    |                |             |
| RASGRP1                                        | 15                                                 | 38488103    | 38565575    | -                  | 6097           |             |
| protein_coding                                 | RAS guanyl releasing protein 1 [Source:HGNC        |             |             |                    |                |             |
| Symbol;Acc:HGNC:9878]                          | -                                                  | 7           | 6           | 11                 | 51             | 33          |
| 7                                              | 0.062787987                                        | 0.043387938 | 0.083575493 |                    |                |             |
| 0.404441021                                    | 0.235861112                                        | 0.053595445 |             |                    |                |             |

|                        |                                                        |                           |                |             |      |             |  |
|------------------------|--------------------------------------------------------|---------------------------|----------------|-------------|------|-------------|--|
| ENSG00000147475        | 1675.280506                                            | 1939.181787               | 2033.820706    |             |      |             |  |
| 2295.461237            | 2303.840751                                            | 2246.002324               | 1882.761       |             |      |             |  |
| 2281.768104            | -0.276916052                                           | 0.044374048               | 0.173030934    | ERLIN2      |      |             |  |
| 8                      | 37736601                                               | 37759101                  | + 9415         |             |      |             |  |
| protein_coding         | ER lipid raft associated 2 [Source:HGNC                |                           |                |             |      |             |  |
| Symbol;Acc:HGNC:1356]  | -                                                      | 1448                      | 2092           | 2080        | 2285 | 2521        |  |
| 2289                   | 8.41090931                                             | 9.796598598               | 10.23400127    |             |      |             |  |
| 11.73456775            | 11.66839491                                            | 11.34936345               |                |             |      |             |  |
| ENSG00000121039        | 248.7467603                                            | 218.7604692               | 249.3385961    |             |      |             |  |
| 318.4512964            | 301.5737595                                            | 372.8618974               | 238.9486085    |             |      |             |  |
| 330.9623178            | -0.470358738                                           | 0.044379119               | 0.173030934    | RDH10       |      |             |  |
| 8                      | 73294612                                               | 73325281                  | + 5321         |             |      |             |  |
| protein_coding         | retinol dehydrogenase 10 [Source:HGNC                  |                           |                |             |      |             |  |
| Symbol;Acc:HGNC:19975] | -                                                      | 215                       | 236            | 255         | 317  | 330         |  |
| 380                    | 2.209733571                                            | 1.955476954               | 2.219981612    |             |      |             |  |
| 2.880495624            | 2.702584482                                            | 3.333775676               |                |             |      |             |  |
| ENSG00000116120        | 2702.662474                                            | 2373.921872               | 2503.163945    |             |      |             |  |
| 2208.062932            | 1876.154328                                            | 2170.448729               | 2526.582764    |             |      |             |  |
| 2084.888663            | 0.277137183                                            | 0.044381127               | 0.173030934    | FARSB       |      |             |  |
| 2                      | 222570536                                              | 222656337                 | - 3369         |             |      |             |  |
| protein_coding         | phenylalanyl-tRNA synthetase subunit beta [Source:HGNC |                           |                |             |      |             |  |
| Symbol;Acc:HGNC:17800] | -                                                      | 2336                      | 2561           | 2560        | 2198 | 2053        |  |
| 2212                   | 37.91984384                                            | 33.5152548                | 35.19989842    |             |      |             |  |
| 31.54480838            | 26.55501409                                            | 30.64997661               |                |             |      |             |  |
| ENSG00000238137        | 0                                                      | 0                         | 0              | 4.569299387 |      |             |  |
| 15.69944831            | 0                                                      | 6.756249233               | -5.176062668   | 0.044389894 |      |             |  |
| 1                      | ARPC3P2 1                                              | 211442274                 | 211442806      | +           |      |             |  |
| 533                    | processed_pseudogene                                   | actin related protein 2/3 |                |             |      |             |  |
| complex subunit        | 3 pseudogene 2 [Source:HGNC Symbol;Acc:HGNC:39431]     |                           |                |             |      |             |  |
| -                      | 0                                                      | 0                         | 0              | 5           | 16   | 0           |  |
| 0                      | 0                                                      | 0                         | 0.408791063    | 1.401324805 |      |             |  |
| ENSG00000100583        | 98.34174244                                            | 53.76316617               | 55.73450972    |             |      |             |  |
| 89.40746176            | 164.4947779                                            | 117.7458623               | 69.27980611    |             |      |             |  |
| 123.8827007            | -0.843958988                                           | 0.044405671               | 0.17308248     | SAMD15      |      |             |  |
| 14                     | 77376689                                               | 77391497                  | + 2616         |             |      |             |  |
| protein_coding         | sterile alpha motif domain containing 15 [Source:HGNC  |                           |                |             |      |             |  |
| Symbol;Acc:HGNC:18631] | -                                                      | 85                        | 58             | 57          | 89   | 180         |  |
| 120                    | 1.776952827                                            | 0.977516759               | 1.009344851    |             |      |             |  |
| 1.644952961            | 2.998426194                                            | 2.141359292               |                |             |      |             |  |
| ENSG00000065057        | 319.3214225                                            | 332.7754596               | 327.5624694    |             |      |             |  |
| 430.9640572            | 426.7725628                                            | 438.6033372               | 326.5531172    |             |      |             |  |
| 432.1133191            | -0.403817255                                           | 0.044424346               | 0.173111133    | NTHL1       |      |             |  |
| 16                     | 2039815 2047866                                        | - 2430                    | protein_coding | nth         |      |             |  |
| like DNA glycosylase 1 | [Source:HGNC Symbol;Acc:HGNC:8028]                     |                           |                |             |      |             |  |
| 276                    | 359                                                    | 335                       | 429            | 467         | 447  | 6.211514755 |  |
| 6.513615717            | 6.386177558                                            | 8.535957323               | 8.374698961    |             |      |             |  |
| 8.587115124            |                                                        |                           |                |             |      |             |  |
| ENSG00000258539        | 18.51138681                                            | 0                         | 1.955596832    | 0           | 0    |             |  |
| 0                      | 6.822327881                                            | 0                         | 5.256832008    | 0.044445238 |      |             |  |
| 1                      | AC068896.1                                             | 10                        | 124617080      | 124791727   |      |             |  |

|                                     |                 |                |                  |                            |                |             |              |
|-------------------------------------|-----------------|----------------|------------------|----------------------------|----------------|-------------|--------------|
| FAM53B                              | -               | 3422           | protein_coding   | novel transcript (METTL10- |                |             |              |
|                                     | readthrough)    | -              | 16               | 0                          | 2              | 0           | 0            |
|                                     | 0               | 0.255702333    | 0                | 0.027074001                | 0              | 0           | 0            |
|                                     | 0               |                |                  |                            |                |             |              |
| ENSG00000084693                     | 631.7010749     |                | 784.2006652      |                            | 930.8640922    |             |              |
| 583.659947                          | 533.6941684     |                | 664.2829067      |                            | 782.2552774    |             |              |
| 593.8790074                         | 0.398405195     |                | 0.044455008      |                            | 0.17318647     |             | AGBL5        |
|                                     | 2               | 27042364       | 27070622         |                            | +              | 5283        |              |
| protein_coding                      | ATP/GTP binding |                | protein like 5   |                            | [Source:HGNC   |             |              |
| Symbol;Acc:HGNC:26147]              | -               |                | 546              | 846                        | 952            | 581         | 584          |
|                                     | 677             | 5.652059756    | 7.060309026      |                            | 8.347545472    |             |              |
| 5.317368252                         | 4.817157368     |                | 5.982105856      |                            |                |             |              |
| ENSG00000164258                     | 776.3212844     |                | 756.3921309      |                            | 782.2387329    |             |              |
| 532.4264577                         | 530.9525888     |                | 719.2309758      |                            | 771.6507161    |             |              |
| 594.2033407                         | 0.377090531     |                | 0.044479998      |                            | 0.173196988    |             | NDUFS4       |
|                                     | 5               | 53560633       | 53683340         |                            | +              | 1176        |              |
| protein_coding                      | NADH:ubiquinone |                | oxidoreductase   |                            | subunit S4     |             | [Source:HGNC |
| Symbol;Acc:HGNC:7711]               | -               |                | 671              | 816                        | 800            | 530         | 581          |
|                                     | 733             | 31.20397427    | 30.59262865      |                            | 31.51266416    |             |              |
| 21.79062889                         | 21.52917601     |                | 29.09662982      |                            |                |             |              |
| ENSG00000176410                     | 53.22023708     |                | 81.57170039      |                            | 102.6688337    |             |              |
| 110.5036044                         | 171.805657      |                | 126.576802       |                            | 79.15359039    |             |              |
| 136.2953545                         | -0.781512412    |                | 0.044480367      |                            | 0.173196988    |             |              |
| DNAJC30                             | 7               | 73680969       | 73683453         |                            | -              | 2485        |              |
| protein_coding                      | DnaJ heat shock |                | protein family   |                            | (Hsp40) member |             | C30          |
| [Source:HGNC Symbol;Acc:HGNC:16410] | -               |                | -                |                            | 46             | 88          | 105          |
|                                     | 110             | 188            | 129              |                            | 1.012339427    | 1.561313939 |              |
| 1.957335901                         | 2.140264798     |                | 3.296780661      |                            | 2.423312113    |             |              |
| ENSG00000233966                     | 172.3872897     |                | 185.3902282      |                            | 232.716023     |             |              |
| 96.43950931                         | 143.4760008     |                | 142.2762503      |                            | 196.8311803    |             |              |
| 127.3972535                         | 0.627551395     |                | 0.044547443      |                            | 0.173413997    |             |              |
| UBE2SP1                             | 17              | 15704232       | 15704900         |                            | -              | 669         |              |
| processed_pseudogene                | ubiquitin       |                | conjugating      |                            | enzyme E2 S    |             | pseudogene 1 |
| [Source:HGNC Symbol;Acc:HGNC:30864] | -               |                | -                |                            | 149            | 200         | 238          |
|                                     | 96              | 157            | 145              |                            | 12.18021245    | 13.18068059 |              |
| 16.47985154                         | 6.938192286     |                | 10.22662032      |                            | 10.11784263    |             |              |
| ENSG00000166455                     | 0               | 0              | 0                | 0                          | 24.67421669    | 0           |              |
|                                     | 0               | 8.224738897    | -5.461878964     |                            | 0.044577398    | 1           |              |
|                                     | C16orf46        | 16             | 81053497         |                            | 81077267       | -           |              |
|                                     | 2376            | protein_coding | chromosome 16    |                            | open reading   |             | frame 46     |
| [Source:HGNC Symbol;Acc:HGNC:26525] | -               |                | -                |                            | 0              | 0           | 0            |
|                                     | 0               | 27             | 0                | 0                          | 0              | 0           |              |
| 0.495194629                         | 0               |                |                  |                            |                |             |              |
| ENSG00000259130                     | 0               | 0              | 0                | 0                          | 24.67421669    | 0           |              |
|                                     | 0               | 8.224738897    | -5.461878964     |                            | 0.044577398    | 1           |              |
|                                     | AL133371.3      | 14             | 20870278         |                            | 20873592       | -           |              |
|                                     | 583             | lincRNA        | novel transcript |                            | -              | 0           | 0            |
|                                     | 0               | 0              | 27               | 0                          | 0              | 0           | 0            |
|                                     | 2.018151696     | 0              |                  |                            |                |             |              |
| ENSG00000259736                     | 16.19746346     |                | 4.634755704      |                            | 11.73358099    | 0           |              |

|                                    |                                   |                        |             |           |                |
|------------------------------------|-----------------------------------|------------------------|-------------|-----------|----------------|
| 0                                  | 2.943646558                       | 10.85526672            | 0.981215519 |           |                |
| 3.473258319                        | 0.044598469                       | 1                      | CRTC3-AS1   | 15        |                |
| 90620007                           | 90717141                          | -                      | 957         | antisense | CRTC3          |
| antisense RNA 1                    | [Source:HGNC                      | Symbol;Acc:HGNC:51433] | -           |           | 14             |
| 5                                  | 12                                | 0                      | 0           | 3         | 0.800038359    |
| 0.23035202                         | 0.580860393                       | 0                      | 0           |           | 0.146337406    |
| ENSG00000167114                    | 752.0250892                       | 793.4701766            |             |           | 822.328468     |
| 1263.759403                        | 913.8598774                       | 883.0939675            |             |           | 789.2745779    |
| 1020.237749                        | -0.369846573                      | 0.044601571            |             |           | 0.173580504    |
| SLC27A4 9                          | 128340646                         | 128361470              |             | +         | 3110           |
| protein_coding                     | solute carrier family 27 member 4 | [Source:HGNC           |             |           |                |
| Symbol;Acc:HGNC:10998]             | -                                 | 650                    | 856         | 841       | 1258           |
| 900                                | 11.43003816                       | 12.13521105            |             |           | 1000           |
| 19.5578661                         | 14.01193806                       | 13.50915412            |             |           |                |
| ENSG00000002586                    | 4405.710061                       | 6303.267758            |             |           | 5736.743308    |
| 3415.565955                        | 5037.195644                       | 4499.854372            |             |           | 5481.907042    |
| 4317.538657                        | 0.34456106                        | 0.044628755            |             |           | 0.17364209     |
| X                                  | 2691133                           | 2741309                | +           | 4912      | protein_coding |
| molecule (Xg blood group)          | [Source:HGNC                      | Symbol;Acc:HGNC:7082]  |             |           | CD99           |
| 3808                               | 6800                              | 5867                   | 3400        | 5512      | 4586           |
| 61.03578191                        | 55.3299383                        |                        | 33.46738466 |           | 42.39682108    |
| 43.58346232                        |                                   |                        |             |           | 48.90006636    |
| ENSG00000151718                    | 1166.217369                       | 1230.064164            |             |           | 1492.120383    |
| 1095.99484                         | 981.4855083                       | 1033.219942            |             |           | 1296.133972    |
| 1036.900097                        | 0.32236686                        | 0.04465192             |             |           | 0.173688014    |
| 4                                  | 183099293                         | 183320777              |             | +         | 9966           |
| protein_coding                     | WW and C2 domain containing 2     | [Source:HGNC           |             |           |                |
| Symbol;Acc:HGNC:24148]             | -                                 | 1008                   | 1327        | 1526      | 1091           |
| 1053                               | 5.531391042                       | 5.870620381            |             |           | 1074           |
| 5.293038882                        | 4.696150389                       | 4.932345884            |             |           |                |
| ENSG00000182372                    | 1126.880672                       | 1047.454789            |             |           | 1055.044491    |
| 1493.807816                        | 1292.197867                       | 1213.763598            |             |           | 1076.459984    |
| 1333.256427                        | -0.30880902                       | 0.044676676            |             |           | 0.173740105    |
| 8                                  | 1755778                           | 1801711                | +           | 9459      | protein_coding |
| transmembrane ER and ERGIC protein | [Source:HGNC                      |                        |             |           | "CLN8,         |
| Symbol;Acc:HGNC:2079]"             | -                                 | 974                    | 1130        | 1079      | 1487           |
| 1237                               | 5.631297144                       | 5.267046784            |             |           | 1414           |
| 7.600933966                        | 6.514225402                       | 6.104786919            |             |           |                |
| ENSG00000278374                    | 2.313923351                       | 2.780853423            |             |           | 16.62257307    |
| 0.913859877                        | 0                                 | 7.239116616            |             |           | 0              |
| 4.389291011                        | 0.04468167                        | 1                      | RF00015     | 8         | 123454981      |
| 123455107                          | -                                 | 127                    | snRNA       | -         | 2              |
| 3                                  | 17                                | 0                      | 1           | 0         | 0.861233645    |
| 1.041481337                        | 6.200799034                       | 0                      | 0.343126987 | 0         |                |
| ENSG00000113578                    | 423.4479733                       | 333.7024107            |             |           | 405.7863427    |
| 256.1674466                        | 235.7758484                       | 340.4817853            |             |           | 387.6455756    |
| 277.4750267                        | 0.482013782                       | 0.044743119            |             |           | 0.173944141    |
| 5                                  | 142592178                         | 142698070              |             | -         | 5275           |
| protein_coding                     | fibroblast growth factor 1        | [Source:HGNC           |             |           |                |
| Symbol;Acc:HGNC:3665]              | -                                 | 366                    | 360         | 415       | 255            |
|                                    |                                   |                        |             |           | 258            |



|                                             |                                                   |             |             |             |             |
|---------------------------------------------|---------------------------------------------------|-------------|-------------|-------------|-------------|
| 347                                         | 3.794489314                                       | 3.008943236 | 3.644417208 |             |             |
| 2.337324078                                 | 2.131355234                                       | 3.07081071  |             |             |             |
| ENSG00000198856                             | 2094.100633                                       | 1748.229852 | 1902.795718 |             |             |
| 1395.35915                                  | 1655.000238                                       | 1626.855331 | 1915.042068 |             |             |
| 1559.071573                                 | 0.296220191                                       | 0.044751901 | 0.173944141 | OSTC        |             |
| 4                                           | 108650584                                         | 108667820   | + 1617      |             |             |
| protein_coding                              | oligosaccharyltransferase complex non-catalytic   |             |             |             |             |
| subunit [Source:HGNC Symbol;Acc:HGNC:24448] |                                                   |             | - 1810      | 1886        |             |
| 1946                                        | 1389                                              | 1811        | 1658        | 61.21576311 | 51.42397293 |
| 55.74876768                                 | 41.53301341                                       | 48.80530466 | 47.86527321 |             |             |
| ENSG00000118503                             | 452.3720152                                       | 558.9515379 | 381.3413823 |             |             |
| 700.1910208                                 | 705.4998254                                       | 492.5701908 | 464.2216451 |             |             |
| 632.753679                                  | -0.446512252                                      | 0.044772606 | 0.173980383 |             |             |
| TNFAIP3 6                                   | 137867188                                         | 137883312   | + 5051      |             |             |
| protein_coding                              | TNF alpha induced protein 3 [Source:HGNC          |             |             |             |             |
| Symbol;Acc:HGNC:11896]                      | -                                                 | 391         | 603         | 390         | 697         |
| 502                                         | 4.233446752                                       | 5.263491205 | 3.576759129 | 772         |             |
| 6.67200904                                  | 6.660372662                                       | 4.639512877 |             |             |             |
| ENSG00000177674                             | 893.1744137                                       | 1251.38404  | 1082.422847 |             |             |
| 1200.470975                                 | 1506.041078                                       | 1406.081839 | 1075.660433 |             |             |
| 1370.864631                                 | -0.34923194                                       | 0.044822364 | 0.174129472 | AGTRAP      |             |
| 1                                           | 11736084                                          | 11754802    | + 2435      |             |             |
| protein_coding                              | angiotensin II receptor associated protein        |             |             |             |             |
| [Source:HGNC Symbol;Acc:HGNC:13539]         | -                                                 | 772         | 1350        | 1107        |             |
| 1195                                        | 1648                                              | 1433        | 17.33856087 | 24.44380221 |             |
| 21.05964816                                 | 23.72849296                                       | 29.49285662 | 27.47218869 |             |             |
| ENSG00000137312                             | 2166.989219                                       | 2071.7358   | 2458.185218 |             |             |
| 1531.981789                                 | 1912.708723                                       | 1972.243194 | 2232.303412 |             |             |
| 1805.644569                                 | 0.305919731                                       | 0.04486714  | 0.17425914  | FL0T1       |             |
| 6                                           | 30727709                                          | 30742733    | - 3186      |             |             |
| protein_coding                              | flotillin 1 [Source:HGNC Symbol;Acc:HGNC:3757]    |             |             | -           |             |
| 1873                                        | 2235                                              | 2514        | 1525        | 2093        | 2010        |
| 30.92898828                                 | 36.55291005                                       | 23.1433002  | 28.62740978 |             |             |
| 29.45074747                                 |                                                   |             |             |             |             |
| ENSG00000137871                             | 529.8884475                                       | 355.9492381 | 321.6956789 |             |             |
| 309.4100924                                 | 290.607441                                        | 249.2287419 | 402.5111215 |             |             |
| 283.0820918                                 | 0.506180731                                       | 0.044903925 | 0.174315045 |             |             |
| ZNF280D 15                                  | 56630181                                          | 56734086    | - 12113     |             |             |
| protein_coding                              | zinc finger protein 280D [Source:HGNC             |             |             |             |             |
| Symbol;Acc:HGNC:25953]                      | -                                                 | 458         | 384         | 329         | 308         |
| 254                                         | 2.067799726                                       | 1.397698391 | 1.25819118  | 318         |             |
| 1.229419836                                 | 1.14402101                                        | 0.978876799 |             |             |             |
| ENSG00000089053                             | 3078.675019                                       | 2921.749996 | 3100.598778 |             |             |
| 2695.28337                                  | 2396.140599                                       | 2540.36698  | 3033.674598 |             |             |
| 2543.930316                                 | 0.254031404                                       | 0.04490434  | 0.174315045 | ANAPC5      |             |
| 12                                          | 121308245                                         | 121399896   | - 12304     |             |             |
| protein_coding                              | anaphase promoting complex subunit 5 [Source:HGNC |             |             |             |             |
| Symbol;Acc:HGNC:15713]                      | -                                                 | 2661        | 3152        | 3171        | 2683        |
| 2589                                        | 11.82750839                                       | 11.29467775 | 11.93857179 | 2622        |             |
| 10.54327579                                 | 9.286348173                                       | 9.822719984 |             |             |             |

|                                     |                                                                                                      |                      |                 |                            |
|-------------------------------------|------------------------------------------------------------------------------------------------------|----------------------|-----------------|----------------------------|
| ENSG00000169612                     | 202.4682933                                                                                          | 364.2917984          | 307.0287027     |                            |
| 389.7763501                         | 356.4053522                                                                                          | 520.0442253          | 291.2629314     |                            |
| 422.0753092                         | -0.532833264                                                                                         | 0.044958766          | 0.174482016     | RAMAC                      |
| 15                                  | 82986207                                                                                             | 82991057             | + 1568          |                            |
| protein_coding                      | RNA guanine-7 methyltransferase activating subunit                                                   |                      |                 |                            |
| [Source:HGNC Symbol;Acc:HGNC:31022] | -                                                                                                    | 175                  | 393             | 314                        |
| 388                                 | 390                                                                                                  | 530                  | 6.103608977     | 11.05046237                |
| 9.276540512                         | 11.96428869                                                                                          | 10.83869877          | 15.77886815     |                            |
| ENSG00000154358                     | 4.627846703                                                                                          | 5.561706845          | 6.844588913     |                            |
| 12.05493866                         | 34.72667534                                                                                          | 18.64309487          | 5.678047487     |                            |
| 21.80823629                         | -1.939670944                                                                                         | 0.044976326          | 0.174487119     | OBSCN                      |
| 1                                   | 228208130                                                                                            | 228378874            | + 32290         |                            |
| protein_coding                      | "obscurin, cytoskeletal calmodulin and titin-interacting RhoGEF [Source:HGNC Symbol;Acc:HGNC:15719]" |                      |                 | - 4                        |
| 6                                   | 7                                                                                                    | 12                   | 38              | 19                         |
| 0.008192513                         | 0.010042283                                                                                          | 0.017968607          | 0.006774647     | 0.051283086                |
| 0.027468288                         |                                                                                                      |                      |                 |                            |
| ENSG00000130052                     | 677.979542                                                                                           | 656.2814077          | 967.0426336     |                            |
| 569.5958519                         | 571.1624234                                                                                          | 604.42876            | 767.1011944     |                            |
| 581.7290118                         | 0.399384615                                                                                          | 0.044982909          | 0.174487119     | STARD8                     |
| X                                   | 68647666                                                                                             | 68725842             | + 5558          |                            |
| protein_coding                      | StAR related lipid transfer domain containing 8                                                      |                      |                 |                            |
| [Source:HGNC Symbol;Acc:HGNC:19161] | -                                                                                                    | 586                  | 708             | 989                        |
| 567                                 | 625                                                                                                  | 616                  | 5.765988692     | 5.616278988                |
| 8.242903299                         | 4.932484543                                                                                          | 4.900270708          | 5.173782953     |                            |
| ENSG00000219085                     | 11.56961676                                                                                          | 4.634755704          | 0.977798416     | 0                          |
| 0                                   | 0                                                                                                    | 5.727390293          | 0               | 5.006264878                |
| 0.045001434                         | 1                                                                                                    | NPM1P37 6            | 69705287        | 69706160                   |
| -                                   | 874                                                                                                  | processed_pseudogene | nucleophosmin 1 |                            |
| pseudogene 37                       | [Source:HGNC Symbol;Acc:HGNC:45216]                                                                  |                      |                 | - 10                       |
| 5                                   | 1                                                                                                    | 0                    | 0               | 0                          |
| 0.252227555                         | 0.053001849                                                                                          | 0                    | 0               | 0                          |
| ENSG00000196172                     | 83.30124065                                                                                          | 50.05536161          | 75.29047804     |                            |
| 43.19686355                         | 11.88017841                                                                                          | 38.26740526          | 69.54902677     |                            |
| 31.11481574                         | 1.162107968                                                                                          | 0.045006147          | 0.17453297      | ZNF681                     |
| 19                                  | 23739195                                                                                             | 23758891             | - 6497          |                            |
| protein_coding                      | zinc finger protein 681 [Source:HGNC Symbol;Acc:HGNC:26457]                                          |                      |                 | zf-C2H2 72 54 77 43 13     |
| 39                                  | 0.606058215                                                                                          | 0.366450105          | 0.549010075     |                            |
| 0.32000503                          | 0.087194498                                                                                          | 0.280219127          |                 |                            |
| ENSG00000127884                     | 1674.123545                                                                                          | 1905.811546          | 2070.977045     |                            |
| 1415.450715                         | 1552.647932                                                                                          | 1634.705055          | 1883.637379     |                            |
| 1534.267901                         | 0.296251464                                                                                          | 0.045056819          | 0.174685161     | ECHS1                      |
| 10                                  | 133362480                                                                                            | 133373689            | - 1617          |                            |
| protein_coding                      | "enoyl-CoA hydratase, short chain 1 [Source:HGNC Symbol;Acc:HGNC:3151]"                              |                      |                 | - 1447 2056 2118 1409 1699 |
| 1666                                | 48.93878962                                                                                          | 56.05921969          | 60.67620244     |                            |
| 42.13104096                         | 45.78697549                                                                                          | 48.09622748          |                 |                            |
| ENSG00000117595                     | 5.784808379                                                                                          | 5.561706845          | 4.888992081     | 0                          |
| 0                                   | 0                                                                                                    | 5.411835768          | 0               | 4.928738927                |

|                        |                       |                   |              |                        |                |             |
|------------------------|-----------------------|-------------------|--------------|------------------------|----------------|-------------|
| 0.04508317             | 1                     | IRF6              | 1            | 209785623              | 209806175      |             |
| -                      | 4965                  | protein_coding    | interferon   | regulatory             | factor         | 6           |
| [Source:HGNC           | Symbol;Acc:HGNC:6121] | IRF               | 5            | 6                      | 5              |             |
| 0                      | 0                     | 0                 | 0.055073853  | 0.053280213            |                |             |
| 0.046650167            | 0                     | 0                 | 0            |                        |                |             |
| ENSG00000127920        | 675.6656186           | 696.1403068       | 502.5883859  |                        |                |             |
| 692.154395             | 892.8411002           | 878.1878899       | 624.7981038  |                        |                |             |
| 821.0611284            | -0.394538331          | 0.045088244       | 0.174722911  |                        |                | GNG11       |
| 7                      | 93921699              | 93928610          | +            | 3055                   |                |             |
| protein_coding         | G protein subunit     | gamma             | 11           | [Source:HGNC           |                |             |
| Symbol;Acc:HGNC:4403]  | -                     | 584               | 751          | 514                    | 689            | 977         |
| 895                    | 10.45433338           | 10.83833774       | 7.793891583  |                        |                |             |
| 10.90458705            | 13.93612223           | 13.67596109       |              |                        |                |             |
| ENSG00000130270        | 38.1797353            | 57.47097073       | 107.5578258  |                        |                |             |
| 31.14192488            | 33.81281546           | 29.43646558       | 67.73617727  |                        |                |             |
| 31.46373531            | 1.108209462           | 0.045089415       | 0.174722911  |                        |                | ATP8B3      |
| 19                     | 1782075               | 1812276           | -            | 7014                   | protein_coding | ATPase      |
| phospholipid           | transporting          | 8B3               | [Source:HGNC | Symbol;Acc:HGNC:13535] |                |             |
| -                      | 33                    | 62                | 110          | 31                     | 37             | 30          |
| 0.257301839            | 0.389726454           | 0.726489563       | 0.213696372  |                        |                |             |
| 0.229876492            | 0.19966481            |                   |              |                        |                |             |
| ENSG00000179918        | 1435.78944            | 1504.441702       | 1493.098181  |                        |                |             |
| 1847.41935             | 1750.955525           | 1744.601194       | 1477.776441  |                        |                |             |
| 1780.992023            | -0.269062071          | 0.045117523       | 0.174761251  |                        |                | SEPHS2      |
| 16                     | 30443631              | 30446181          | -            | 2551                   |                |             |
| protein_coding         | selenophosphate       | synthetase        | 2            | [Source:HGNC           |                |             |
| Symbol;Acc:HGNC:19686] | -                     | 1241              | 1623         | 1527                   | 1839           | 1916        |
| 1778                   | 26.60455724           | 28.05059121       | 27.72879738  |                        |                |             |
| 34.85559391            | 32.72982203           | 32.53623782       |              |                        |                |             |
| ENSG00000157538        | 2149.634793           | 1823.312894       | 1838.261022  |                        |                |             |
| 2479.299052            | 2421.728675           | 2163.58022        | 1937.06957   |                        |                |             |
| 2354.869316            | -0.282172053          | 0.045131281       | 0.174761251  |                        |                | VPS26C      |
| 21                     | 37223420              | 37267919          | -            | 9301                   |                |             |
| protein_coding         | VPS26 endosomal       | protein sorting   | factor       | C                      | [Source:HGNC   |             |
| Symbol;Acc:HGNC:3044]  | -                     | 1858              | 1967         | 1880                   | 2468           | 2650        |
| 2205                   | 10.92473165           | 9.324137591       | 9.363337132  |                        |                |             |
| 12.82970668            | 12.41580341           | 11.06687451       |              |                        |                |             |
| ENSG00000280241        | 5.784808379           | 9.269511408       | 2.933395248  |                        |                |             |
| 38.17397244            | 15.53561792           | 15.69944831       | 5.995905012  |                        |                |             |
| 23.13634622            | -1.943101145          | 0.045142032       | 0.174761251  |                        |                |             |
| AC079298.3             | 4                     | 154142122         | 154298819    | +                      | 1376           |             |
| antisense              | "novel transcript,    | antisense to      | DCHS2"       | -                      |                |             |
| 5                      | 10                    | 3                 | 38           | 17                     | 16             | 0.198722153 |
| 0.320416981            | 0.100996256           | 1.33526166        | 0.538380207  |                        |                |             |
| 0.542809681            |                       |                   |              |                        |                |             |
| ENSG00000109111        | 5266.489548           | 5862.965966       | 5915.680418  |                        |                |             |
| 7844.751336            | 5639.429304           | 7390.515293       | 5681.711977  |                        |                |             |
| 6958.231977            | -0.292243125          | 0.045145037       | 0.174761251  |                        |                | SUPT6H      |
| 17                     | 28662091              | 28702684          | +            | 10620                  |                |             |
| protein_coding         | "SPT6 homolog,        | histone chaperone | [Source:HGNC |                        |                |             |

|                                 |                                                  |             |             |                     |             |
|---------------------------------|--------------------------------------------------|-------------|-------------|---------------------|-------------|
| Symbol;Acc:HGNC:11470]" -       | 4552                                             | 6325        | 6050        | 7809                | 6171        |
| 7532                            | 23.44080108                                      | 26.25850347 | 26.38963076 |                     |             |
| 35.55266188                     | 25.32151157                                      | 33.10791492 |             |                     |             |
| ENSG00000085978                 | 926.7263022                                      | 935.2937011 | 854.5958157 |                     |             |
| 1277.823498                     | 1214.519777                                      | 946.8729763 | 905.5386064 |                     |             |
| 1146.405417                     | -0.340359606                                     | 0.045184485 | 0.174869677 |                     |             |
| ATG16L1 2                       | 233210051                                        | 233295674   | +           | 6047                |             |
| protein_coding                  | autophagy related 16 like 1 [Source:HGNC         |             |             |                     |             |
| Symbol;Acc:HGNC:21498]" -       | 801                                              | 1009        | 874         | 1272                | 1329        |
| 965                             | 7.244147095                                      | 7.356735731 | 6.695359791 |                     |             |
| 10.1706418                      | 9.577311436                                      | 7.449607312 |             |                     |             |
| ENSG00000173599                 | 673.3516953                                      | 1022.427108 | 1237.892795 |                     |             |
| 524.3898319                     | 779.5224754                                      | 813.4276656 | 977.8905328 |                     |             |
| 705.779991                      | 0.470949909                                      | 0.045245755 | 0.175062481 |                     | PC          |
| 11                              | 66848233                                         | 66958376    | -           | 5927                |             |
| protein_coding                  | pyruvate carboxylase [Source:HGNC                |             |             |                     |             |
| Symbol;Acc:HGNC:8636]" -        | 582                                              | 1103        | 1266        | 522                 | 853         |
| 829                             | 5.37010491                                       | 8.204923632 | 9.894668171 |                     |             |
| 4.258305273                     | 6.271518413                                      | 6.529285201 |             |                     |             |
| ENSG00000267064                 | 12.72657843                                      | 0           | 11.73358099 | 0                   | 0           |
| 0.981215519                     | 8.153386476                                      | 0.32707184  | 4.555305243 |                     |             |
| 0.045259638                     | 1                                                | UXT-AS1 X   | 47658833    |                     |             |
| 47660377                        | +                                                | 1545        | antisense   | UXT antisense RNA 1 |             |
| [Source:HGNC                    | Symbol;Acc:HGNC:49239]" -                        |             |             |                     |             |
| 0                               | 0                                                | 1           | 0.389366797 | 0                   | 0.359795078 |
| 0                               | 0                                                | 0.030214649 |             |                     |             |
| ENSG00000083812                 | 295.0252273                                      | 346.6797267 | 469.3432398 |                     |             |
| 451.0556217                     | 512.6753912                                      | 565.1801392 | 370.3493979 |                     |             |
| 509.6370507                     | -0.459548749                                     | 0.045260754 | 0.175076202 |                     | ZNF324      |
| 19                              | 58467045                                         | 58475436    | +           | 5664                |             |
| protein_coding                  | zinc finger protein 324 [Source:HGNC             |             |             |                     |             |
| Symbol;Acc:HGNC:14096]" zf-C2H2 | 255                                              | 374         | 480         | 449                 | 561         |
| 576                             | 2.462133791                                      | 2.911268863 | 3.925730196 |                     |             |
| 3.832871971                     | 4.316166745                                      | 4.747284667 |             |                     |             |
| ENSG00000173875                 | 798.3035562                                      | 594.1756813 | 572.9898719 |                     |             |
| 965.3996714                     | 843.4926669                                      | 760.4420276 | 655.1563698 |                     |             |
| 856.4447886                     | -0.387617221                                     | 0.045282673 | 0.175116675 |                     | ZNF791      |
| 19                              | 12610918                                         | 12633840    | +           | 6642                |             |
| protein_coding                  | zinc finger protein 791 [Source:HGNC             |             |             |                     |             |
| Symbol;Acc:HGNC:26895]" zf-C2H2 | 690                                              | 641         | 586         | 961                 | 923         |
| 775                             | 5.681263496                                      | 4.254936824 | 4.086967654 |                     |             |
| 6.995612304                     | 6.055659221                                      | 5.44689329  |             |                     |             |
| ENSG00000099889                 | 40.49365865                                      | 86.2064561  | 75.29047804 |                     |             |
| 133.6089035                     | 104.180026                                       | 119.7082934 | 67.3301976  |                     |             |
| 119.165741                      | -0.818374861                                     | 0.045309403 | 0.175134329 |                     | ARVCF       |
| 22                              | 19969896                                         | 20016808    | -           | 5621                |             |
| protein_coding                  | "ARVCF, delta catenin family member [Source:HGNC |             |             |                     |             |
| Symbol;Acc:HGNC:728]" -         | 35                                               | 93          | 77          | 133                 | 114         |
| 122                             | 0.340525133                                      | 0.729463089 | 0.634570086 |                     |             |
| 1.144034897                     | 0.883791588                                      | 1.013193235 |             |                     |             |

|                                            |                                                       |             |                |             |      |
|--------------------------------------------|-------------------------------------------------------|-------------|----------------|-------------|------|
| ENSG00000113742                            | 443.1163218                                           | 461.6216681 | 449.7872714    |             |      |
| 692.154395                                 | 597.6643598                                           | 495.5138373 | 451.5084205    |             |      |
| 595.110864                                 | -0.39814052                                           | 0.045310151 | 0.175134329    | CPEB4       |      |
| 5                                          | 173888280                                             | 173961976   | + 10272        |             |      |
| protein_coding                             | cytoplasmic polyadenylation element binding protein 4 |             |                |             |      |
| [Source:HGNC Symbol;Acc:HGNC:21747]        | -                                                     |             | 383 498        | 460         |      |
| 689                                        | 654 505                                               | 2.039099772 | 2.137510664    |             |      |
| 2.074461011                                | 3.243137991                                           | 2.774478319 | 2.294998485    |             |      |
| ENSG00000282855                            | 0 0                                                   | 1.955596832 | 12.05493866    |             |      |
| 7.310879019                                | 7.849724156                                           | 0.651865611 |                |             |      |
| 9.07184728                                 | -3.772391159                                          | 0.045323212 | 1              | AC093591.3  |      |
| 4                                          | 127809170                                             | 127809477   | + 308          |             |      |
| processed_pseudogene                       | INTS3 and NABP interacting protein (INIP)             |             |                |             |      |
| pseudogene                                 | -                                                     | 0 0 2       | 12 8 8         |             |      |
| 0                                          | 0 0.300802703                                         | 1.883786785 | 1.131873438    |             |      |
| 1.212509936                                |                                                       |             |                |             |      |
| ENSG00000100304                            | 1548.014722                                           | 2235.806152 | 2038.709698    |             |      |
| 2351.717618                                | 2397.968318                                           | 2507.005652 | 1940.843524    |             |      |
| 2418.897196                                | -0.317067252                                          | 0.04535085  | 0.175247332    | TTL12       |      |
| 22                                         | 43166622                                              | 43187133    | - 4622         |             |      |
| protein_coding                             | tubulin tyrosine ligase like 12 [Source:HGNC          |             |                |             |      |
| Symbol;Acc:HGNC:28974]                     | -                                                     | 1338 2412   | 2085 2341      | 2624        |      |
| 2555                                       | 15.83145698                                           | 23.00812988 | 20.89674167    |             |      |
| 24.48909235                                | 24.73958939                                           | 25.80518632 |                |             |      |
| ENSG00000160219                            | 174.701213                                            | 124.2114529 | 176.0037149    |             |      |
| 129.5905906                                | 84.9889686                                            | 74.57237948 | 158.3054603    |             |      |
| 96.38397957                                | 0.715703323                                           | 0.045408012 | 0.175379964    | GAB3        |      |
| X                                          | 154675249                                             | 154751583   | - 5272         |             |      |
| protein_coding                             | GRB2 associated binding protein 3 [Source:HGNC        |             |                |             |      |
| Symbol;Acc:HGNC:17515]                     | -                                                     | 151 134     | 180 129        | 93          |      |
| 76                                         | 1.566376859                                           | 1.120632864 | 1.581610572    |             |      |
| 1.183083848                                | 0.768716397                                           | 0.672952214 |                |             |      |
| ENSG00000182612                            | 56.69112211                                           | 120.5036483 | 118.3136084    |             |      |
| 114.5219173                                | 173.6333767                                           | 221.7547074 | 98.50279293    |             |      |
| 169.9700005                                | -0.78353557                                           | 0.045416994 | 0.175379964    |             |      |
| TSPAN10 17                                 | 81637171                                              | 81648749    | + 4745         |             |      |
| protein_coding                             | tetraspanin 10 [Source:HGNC Symbol;Acc:HGNC:29942]    |             |                |             |      |
| -                                          | 49 130                                                | 121 114     | 190 226        |             |      |
| 0.564747837                                | 1.207928125                                           | 1.181276623 | 1.161635434    |             |      |
| 1.744921854                                | 2.223403363                                           |             |                |             |      |
| ENSG00000177732                            | 1041.265508                                           | 1619.383643 | 1832.394232    |             |      |
| 1614.357203                                | 1964.798736                                           | 2416.733824 | 1497.681128    |             |      |
| 1998.629921                                | -0.415704212                                          | 0.045422888 | 0.175379964    | SOX12       |      |
| 20                                         | 325595 330224                                         | + 4630      | protein_coding | SRY-        |      |
| box 12 [Source:HGNC Symbol;Acc:HGNC:11198] |                                                       |             | HMG            | 900         | 1747 |
| 1874                                       | 1607 2150                                             | 2463        | 10.63056216    | 16.63588356 |      |
| 18.74955874                                | 16.78170576                                           | 20.2355991  | 24.83301533    |             |      |
| ENSG00000213654                            | 219.8227184                                           | 490.3571535 | 500.6327891    |             |      |
| 514.3440497                                | 595.8366401                                           | 667.2265532 | 403.6042203    |             |      |
| 592.469081                                 | -0.551866672                                          | 0.045431063 | 0.175379964    | GPSM3       |      |

|                                          |                                                        |             |             |                 |                   |
|------------------------------------------|--------------------------------------------------------|-------------|-------------|-----------------|-------------------|
| 6                                        | 32190766                                               | 32195523    | -           | 1854            |                   |
| protein_coding                           | G protein signaling modulator 3                        |             |             |                 | [Source:HGNC      |
| Symbol;Acc:HGNC:13945]                   | -                                                      | 190         | 529         | 512             | 512 652           |
| 680                                      | 5.604522072                                            | 12.57997854 |             | 12.79271389     |                   |
| 13.35246498                              | 15.32485816                                            | 17.12163438 |             |                 |                   |
| ENSG00000273523                          | 9.255693406                                            | 0.926951141 |             | 6.844588913     | 0                 |
| 0                                        | 0                                                      | 5.675744487 | 0           | 4.994019347     |                   |
| 0.045432927                              | 1                                                      | AL139082.1  | 13          | 52128891        |                   |
| 52132723                                 | +                                                      | 3433        | antisense   | uncharacterized |                   |
| LOC101929657                             | [Source:NCBI gene;Acc:101929657]                       |             |             | -               | 8 1               |
| 7                                        | 0                                                      | 0           | 0           | 0.127441506     | 0.012842813       |
| 0.094455378                              | 0                                                      | 0           | 0           |                 |                   |
| ENSG00000276740                          | 35.86581195                                            | 21.31987624 |             | 12.71137941     |                   |
| 5.02289111                               | 6.397019142                                            | 7.849724156 |             | 23.29902253     |                   |
| 6.423211469                              | 1.854700402                                            | 0.045454765 |             | 0.175427165     |                   |
| AL445649.1                               | 13                                                     | 107465984   | 107466674   | -               | 691               |
| sense_intronic                           | "novel transcript, sense intronic to FAM155A"          |             |             |                 |                   |
| -                                        | 31                                                     | 23          | 13          | 5               | 7 8               |
| 2.453456482                              | 1.467519047                                            | 0.871500741 |             | 0.349859099     |                   |
| 0.441447021                              | 0.540453054                                            |             |             |                 |                   |
| ENSG00000163632                          | 35.86581195                                            | 22.24682738 |             | 15.64477466     |                   |
| 89.40746176                              | 32.89895559                                            | 51.02320701 |             | 24.58580466     |                   |
| 57.77654145                              | -1.237210049                                           | 0.045482124 |             | 0.175488446     |                   |
| C3orf49 3                                | 63819362                                               | 63848636    |             | +               | 1581              |
| protein_coding                           | chromosome 3 open reading frame 49                     |             |             |                 | [Source:HGNC      |
| Symbol;Acc:HGNC:25190]                   | -                                                      | 31          | 24          | 16              | 89 36             |
| 52                                       | 1.072320322                                            | 0.669288449 |             | 0.468803201     |                   |
| 2.721819701                              | 0.992268555                                            | 1.535385764 |             |                 |                   |
| ENSG00000260541                          | 2.313923351                                            | 1.853902282 |             | 2.933395248     |                   |
| 13.05951689                              | 17.36333767                                            | 9.812155195 |             | 2.367073627     |                   |
| 13.41166992                              | -2.50426314                                            | 0.045556697 |             | 1               | AL031722.1        |
| 16                                       | 1841020                                                | 1843547     | -           | 220             | sense_overlapping |
| "novel transcript, overlapping C16orf73" |                                                        |             |             |                 | - 2               |
| 2                                        | 3                                                      | 13          | 19          | 10              | 0.497166695       |
| 0.400812514                              | 0.631685677                                            | 2.857076625 |             | 3.763479181     |                   |
| 2.121892389                              |                                                        |             |             |                 |                   |
| ENSG00000198846                          | 275.3568788                                            | 141.8235245 |             | 160.3589403     |                   |
| 352.6069559                              | 305.2291991                                            | 227.6420005 |             | 192.5131145     |                   |
| 295.1593852                              | -0.619698271                                           | 0.045574829 |             | 0.175754605     | TOX               |
| 8                                        | 58805418                                               | 59119208    |             | -               | 4131              |
| protein_coding                           | thymocyte selection associated high mobility group box |             |             |                 |                   |
| [Source:HGNC Symbol;Acc:HGNC:18988]      | HMG                                                    |             |             | 238             | 153 164           |
| 351                                      | 334                                                    | 232         | 3.150768354 | 1.632939873     |                   |
| 1.839039718                              | 4.108214754                                            | 3.523301994 |             | 2.621674837     |                   |
| ENSG00000187742                          | 1160.432561                                            | 1214.305995 |             | 1053.088894     |                   |
| 1255.722778                              | 1587.374607                                            | 1416.87521  |             | 1142.60915      |                   |
| 1419.990865                              | -0.31374401                                            | 0.045581256 |             | 0.175754605     |                   |
| SECISBP2                                 | 9                                                      | 89318506    | 89359662    | +               | 9813              |
| protein_coding                           | SECIS binding protein 2                                |             |             |                 | [Source:HGNC      |
| Symbol;Acc:HGNC:30972]                   | -                                                      | 1003        | 1310        | 1077            | 1250 1737         |

|                        |                                                    |             |             |        |
|------------------------|----------------------------------------------------|-------------|-------------|--------|
| 1444                   | 5.589768821                                        | 5.885772273 | 5.084126645 |        |
| 6.158989031            | 7.713591176                                        | 6.869283339 |             |        |
| ENSG00000129028        | 303.123959                                         | 168.7051076 | 258.1387819 |        |
| 189.865284             | 172.7195168                                        | 88.30939675 | 243.3226162 |        |
| 150.2980658            | 0.693523308                                        | 0.045589067 | 0.175754605 | THAP10 |
| 15                     | 70881342                                           | 70892785    | - 2399      |        |
| protein_coding         | THAP domain containing 10 [Source:HGNC             |             |             |        |
| Symbol;Acc:HGNC:23193] | THAP                                               | 262 182     | 264 189     | 189    |
| 90                     | 5.97263199                                         | 3.344838073 | 5.097721845 |        |
| 3.809191203            | 3.43312925                                         | 1.751290925 |             |        |
| ENSG00000108819        | 2021.212047                                        | 2745.629279 | 3559.186235 |        |
| 3563.238954            | 3150.074997                                        | 4078.912914 | 2775.34252  |        |
| 3597.408955            | -0.373919577                                       | 0.045597093 | 0.175754605 |        |
| PPP1R9B 17             | 50133735                                           | 50150630    | - 4298      |        |
| protein_coding         | protein phosphatase 1 regulatory subunit 9B        |             |             |        |
| [Source:HGNC           | Symbol;Acc:HGNC:9298]                              | -           | 1747 2962   | 3640   |
| 3547                   | 3447 4157                                          | 22.22906555 | 30.38453546 |        |
| 39.23172717            | 39.90212215                                        | 34.94889669 | 45.15019696 |        |
| ENSG00000116793        | 1531.817259                                        | 1282.900379 | 1476.475608 |        |
| 1209.512179            | 760.331418                                         | 1291.279624 | 1430.397749 |        |
| 1087.041074            | 0.396152806                                        | 0.045642555 | 0.17588549  | PHTF1  |
| 1                      | 113696831                                          | 113759489   | - 7170      |        |
| protein_coding         | putative homeodomain transcription factor 1        |             |             |        |
| [Source:HGNC           | Symbol;Acc:HGNC:8939]                              | -           | 1324 1384   | 1510   |
| 1204                   | 832 1316                                           | 10.09865515 | 8.510418017 |        |
| 9.755740674            | 8.119112287                                        | 5.05664853  | 8.568065334 |        |
| ENSG00000138821        | 1349.017314                                        | 1119.756978 | 1142.06855  |        |
| 947.3172634            | 907.4628583                                        | 1041.069666 | 1203.614281 |        |
| 965.2832626            | 0.317894009                                        | 0.045667417 | 0.175936947 |        |
| SLC39A8 4              | 102251041                                          | 102431258   | - 6480      |        |
| protein_coding         | solute carrier family 39 member 8 [Source:HGNC     |             |             |        |
| Symbol;Acc:HGNC:20862] | -                                                  | 1166 1208   | 1168 943    | 993    |
| 1061                   | 9.840524734                                        | 8.219130696 | 8.349688866 |        |
| 7.03619559             | 6.677791275                                        | 7.643396935 |             |        |
| ENSG00000169926        | 539.1441409                                        | 520.01959   | 548.5449115 |        |
| 569.5958519            | 778.6086156                                        | 744.7425793 | 535.9028808 |        |
| 697.6490156            | -0.380939764                                       | 0.045718474 | 0.176051916 | KLF13  |
| 15                     | 31326855                                           | 31435665    | + 9409      |        |
| protein_coding         | Kruppel like factor 13 [Source:HGNC                |             |             |        |
| Symbol;Acc:HGNC:13672] | zf-C2H2                                            | 466 561     | 561 567     | 852    |
| 759                    | 2.708551895                                        | 2.628774605 | 2.761988389 |        |
| 2.913672982            | 3.945978585                                        | 3.765688076 |             |        |
| ENSG00000160305        | 966.0629992                                        | 1024.281011 | 1146.957542 |        |
| 791.607639             | 626.9078759                                        | 986.1215971 | 1045.767184 |        |
| 801.545704             | 0.384245481                                        | 0.045720292 | 0.176051916 | DIP2A  |
| 21                     | 46458899                                           | 46569852    | + 13557     |        |
| protein_coding         | disco interacting protein 2 homolog A [Source:HGNC |             |             |        |
| Symbol;Acc:HGNC:17217] | -                                                  | 835 1105    | 1173 788    | 686    |
| 1005                   | 3.368352948                                        | 3.593624041 | 4.008084527 |        |
| 2.810372181            | 2.205053431                                        | 3.460576877 |             |        |

|                        |                                    |                |                                     |                  |             |      |        |
|------------------------|------------------------------------|----------------|-------------------------------------|------------------|-------------|------|--------|
| ENSG00000255434        | 0                                  | 0              | 0                                   | 10.04578222      | 0           |      |        |
| 9.812155195            | 0                                  | 6.619312472    |                                     | -5.144992207     | 0.045725127 |      |        |
| 1                      | AP001922.6                         | 11             |                                     | 75596144         | 75597270    |      |        |
| -                      | 546                                | sense_intronic |                                     | novel transcript |             |      | -      |
| 0                      | 0                                  | 0              | 10                                  | 0                | 10          | 0    | 0      |
| 0                      | 0.885540797                        | 0              |                                     | 0.854974955      |             |      |        |
| ENSG00000116209        | 4052.83675                         |                | 3981.25515                          |                  | 3855.459155 |      |        |
| 2884.144075            | 3514.705089                        |                | 3499.014542                         |                  | 3963.183685 |      |        |
| 3299.287902            | 0.264383724                        |                | 0.045735404                         |                  | 0.176065758 |      | TMEM59 |
| 1                      | 54026681                           |                | 54053504                            |                  | -           | 9149 |        |
| protein_coding         | transmembrane protein 59           |                | [Source:HGNC                        |                  |             |      |        |
| Symbol;Acc:HGNC:1239]  | -                                  | 3503           | 4295                                | 3943             | 2871        |      | 3846   |
| 3566                   | 20.93925484                        |                | 20.69776723                         |                  | 19.96436978 |      |        |
| 15.172627              | 18.31868311                        |                | 18.19507068                         |                  |             |      |        |
| ENSG00000169228        | 30.08100357                        |                | 57.47097073                         |                  | 82.13506696 |      |        |
| 69.31589732            | 102.3523063                        |                | 160.9193452                         |                  | 56.56234709 |      |        |
| 110.8625163            | -0.966857476                       |                | 0.045780019                         |                  | 0.176193139 |      | RAB24  |
| 5                      | 177301198                          |                | 177303744                           |                  | -           | 2065 |        |
| protein_coding         | "RAB24, member RAS oncogene family |                | [Source:HGNC                        |                  |             |      |        |
| Symbol;Acc:HGNC:9765]" | -                                  | 26             | 62                                  | 84               | 69          |      | 112    |
| 164                    | 0.688569853                        |                | 1.323748837                         |                  | 1.884350494 |      |        |
| 1.615586633            | 2.363505212                        |                | 3.707403263                         |                  |             |      |        |
| ENSG00000237849        | 0                                  | 0              | 0                                   | 13.05951689      | 0           |      |        |
| 6.868508636            | 0                                  | 6.642675174    |                                     | -5.149888522     | 0.045795673 |      |        |
| 1                      | NFYAP1                             | 13             | 63975451                            |                  | 63976422    |      | -      |
| 972                    | processed_pseudogene               |                | nuclear transcription factor Y      |                  |             |      |        |
| subunit alpha          | pseudogene 1                       |                | [Source:HGNC Symbol;Acc:HGNC:34078] |                  |             |      | -      |
| 0                      | 0                                  | 0              | 13                                  | 0                | 7           | 0    | 0      |
| 0                      | 0.646663434                        |                | 0                                   |                  | 0.336184597 |      |        |
| ENSG00000243547        | 143.4632478                        |                | 101.0376744                         |                  | 147.6475608 |      |        |
| 67.30674088            | 86.81668835                        |                | 82.42210364                         |                  | 130.716161  |      |        |
| 78.84851096            | 0.72750107                         |                | 0.045870562                         |                  | 0.176497175 |      |        |
| HNRNPKP4               | 3                                  | 96349554       |                                     | 96350939         | +           |      | 1386   |
|                        | processed_pseudogene               |                | heterogeneous nuclear               |                  |             |      |        |
| ribonucleoprotein K    | pseudogene 4                       |                | [Source:HGNC Symbol;Acc:HGNC:42377] |                  |             |      |        |
| -                      | 124                                | 109            | 151                                 | 67               | 95          | 84   |        |
| 4.8927516              | 3.467346354                        |                | 5.046800911                         |                  | 2.337291012 |      |        |
| 2.986888239            | 2.829189852                        |                |                                     |                  |             |      |        |
| ENSG00000000003        | 1861.551336                        |                | 1167.958437                         |                  | 1423.674494 |      |        |
| 1141.20086             | 1127.703089                        |                | 1195.120503                         |                  | 1484.394756 |      |        |
| 1154.674817            | 0.361637304                        |                | 0.045964337                         |                  | 0.176813491 |      | TSPAN6 |
| X                      | 100627109                          |                | 100639991                           |                  | -           | 4535 |        |
| protein_coding         | tetraspanin 6                      |                | [Source:HGNC Symbol;Acc:HGNC:11858] |                  |             |      |        |
| -                      | 1609                               | 1260           | 1456                                | 1136             | 1234        | 1218 |        |
| 19.4032047             | 12.24974961                        |                | 14.87258773                         |                  | 12.11162056 |      |        |
| 11.85759099            | 12.53764685                        |                |                                     |                  |             |      |        |
| ENSG00000179954        | 254.5315687                        |                | 204.8562021                         |                  | 442.9426825 |      |        |
| 212.9705831            | 144.3898606                        |                | 220.7734919                         |                  | 300.7768178 |      |        |
| 192.7113119            | 0.643131121                        |                | 0.045989924                         |                  | 0.176867414 |      | SSC5D  |
| 19                     | 55488404                           |                | 55519098                            |                  | +           | 7314 |        |



|                        |                                                               |                                           |                                     |             |             |                |
|------------------------|---------------------------------------------------------------|-------------------------------------------|-------------------------------------|-------------|-------------|----------------|
| protein_coding         | scavenger receptor cysteine rich family member with 5 domains | [Source:HGNC Symbol;Acc:HGNC:26641]       | -                                   | 220         | 221         |                |
|                        | 453                                                           | 212                                       | 158                                 | 225         | 1.644986877 | 1.332205664    |
|                        | 2.869100108                                                   | 1.401464565                               | 0.941370812                         | 1.436063348 |             |                |
| ENSG00000121440        | 261.4733387                                                   | 328.1407039                               | 400.8973506                         |             |             |                |
| 249.1353991            | 258.6223453                                                   | 176.6187935                               | 330.1704644                         |             |             |                |
| 228.1255126            | 0.534151736                                                   | 0.046030991                               | 0.176980824                         |             |             | PDZRN3         |
|                        | 3                                                             | 73382433                                  | 73624940                            | -           | 6136        |                |
| protein_coding         | PDZ domain containing ring finger 3                           | [Source:HGNC Symbol;Acc:HGNC:17704]       | -                                   | 226         | 354         | 410            |
|                        | 180                                                           | 2.01427054                                | 2.54361788                          | 3.09528727  | 248         | 283            |
| 1.954193419            | 2.009831656                                                   | 1.369409038                               |                                     |             |             |                |
| ENSG00000273382        | 18.51138681                                                   | 16.68512054                               | 15.64477466                         |             |             |                |
| 17.07782977            | 44.77913399                                                   | 72.60994844                               | 16.947094                           |             |             |                |
| 44.82230407            | -1.404923361                                                  | 0.046067244                               | 0.177075675                         |             |             |                |
| AL356488.3             | 1                                                             | 109087971                                 | 109090858                           | -           |             | 2888           |
|                        | antisense                                                     | "novel transcript, antisense to TMEM167B" |                                     |             |             |                |
|                        | -                                                             | 16                                        | 18                                  | 16          | 17          | 49             |
|                        |                                                               |                                           |                                     |             |             | 74             |
| 0.302982473            | 0.274795283                                                   | 0.256640534                               | 0.284611831                         |             |             |                |
| 0.739362618            | 1.196136014                                                   |                                           |                                     |             |             |                |
| ENSG00000265867        | 0                                                             | 0                                         | 0                                   | 14.06409511 | 0           |                |
| 5.887293117            | 0                                                             | 6.650462742                               | -5.15152246                         | 0.046072071 |             |                |
|                        | 1                                                             | MIR4516                                   | 16                                  | 2133119     | 2133204     | +              |
|                        |                                                               |                                           |                                     |             |             | 86             |
|                        | microRNA                                                      | 4516                                      | [Source:HGNC Symbol;Acc:HGNC:41617] |             |             | miRNA          |
|                        | 0                                                             | 0                                         | 0                                   | 14          | 0           | 6              |
|                        | 0                                                             | 0                                         | 0                                   | 0           | 0           | 0              |
|                        | 0                                                             | 7.871016103                               | 0                                   | 3.256858085 |             |                |
| ENSG00000206647        | 5.784808379                                                   | 0                                         | 13.68917783                         | 0           | 0           |                |
|                        | 0                                                             | 6.491328735                               | 0                                   | 5.190814819 | 0.046193462 |                |
|                        | 1                                                             | RF00410                                   | 2                                   | 10155072    | 10155206    | -              |
|                        | 135                                                           | snoRNA                                    |                                     | -           | 5           | 0              |
|                        | 0                                                             | 0                                         | 2.025493942                         | 0           | 4.803930581 | 0              |
|                        | 0                                                             | 0                                         |                                     |             |             |                |
| ENSG00000232815        | 20.82531016                                                   | 63.95962872                               | 45.95652556                         |             |             |                |
| 94.43035287            | 69.45335068                                                   | 99.10276747                               | 43.58048815                         |             |             |                |
| 87.66215701            | -1.000972319                                                  | 0.046197179                               | 0.177530486                         |             |             |                |
| DUX4L50                | 9                                                             | 63817748                                  | 63818462                            | -           | 715         |                |
| unprocessed_pseudogene | double homeobox 4 like 50 (pseudogene)                        | [Source:HGNC Symbol;Acc:HGNC:51788]       | -                                   | 18          | 69          | 47             |
|                        | 94                                                            | 76                                        | 101                                 | 1.376769309 | 4.254778999 |                |
| 3.045048904            | 6.356572845                                                   | 4.631974376                               | 6.594188655                         |             |             |                |
| ENSG00000133812        | 1191.670526                                                   | 1157.761975                               | 1169.446906                         |             |             |                |
| 1089.967371            | 910.2044379                                                   | 789.8784932                               | 1172.959802                         |             |             |                |
| 930.0167673            | 0.33489158                                                    | 0.046258449                               | 0.177721263                         |             |             | SBF2           |
|                        | 11                                                            | 9778667                                   | 10294207                            | -           | 16767       | protein_coding |
|                        | SET binding factor 2                                          | [Source:HGNC Symbol;Acc:HGNC:2135]        | -                                   |             |             |                |
|                        | 1030                                                          | 1249                                      | 1196                                | 1085        | 996         | 805            |
|                        |                                                               |                                           |                                     |             |             | 3.359514912    |
|                        | 3.284286476                                                   | 3.304290876                               | 3.12878406                          | 2.588585844 |             |                |
|                        | 2.241230644                                                   |                                           |                                     |             |             |                |
| ENSG00000184995        | 27.76708022                                                   | 30.58938765                               | 14.66697624                         |             |             |                |
| 58.26553688            | 37.46825497                                                   | 69.66630188                               | 24.34114804                         |             |             |                |

|                                    |                                                        |              |               |        |
|------------------------------------|--------------------------------------------------------|--------------|---------------|--------|
| 55.13336458                        | -1.179555348                                           | 0.046321395  | 0.177918383   | IFNE   |
| 9                                  | 21480839                                               | 21482313     | - 1475        |        |
| protein_coding                     | interferon epsilon [Source:HGNC Symbol;Acc:HGNC:18163] |              |               |        |
| -                                  | 24 33                                                  | 15 58        | 41 71         |        |
| 0.889844118                        | 0.986406391                                            | 0.471087624  | 1.901241081   |        |
| 1.211296421                        | 2.247048076                                            |              |               |        |
| ENSG00000100906                    | 2058.234821                                            | 2827.20098   | 2044.576488   |        |
| 2546.605793                        | 3604.263357                                            | 2700.30511   | 2310.004096   |        |
| 2950.39142                         | -0.352858355                                           | 0.046344636  | 0.177962936   | NFKBIA |
| 14                                 | 35401511                                               | 35404749     | - 2373        |        |
| protein_coding                     | NFKB inhibitor alpha [Source:HGNC                      |              |               |        |
| Symbol;Acc:HGNC:7797]              | -                                                      | 1779 3050    | 2091 2535     | 3944   |
| 2752                               | 40.99896777                                            | 56.66776172  | 40.81866064   |        |
| 51.65132204                        | 72.42654458                                            | 54.13731681  |               |        |
| ENSG00000266088                    | 13.88354011                                            | 12.05036483  | 5.866790497   | 0      |
| 0                                  | 2.943646558                                            | 10.60023181  | 0.981215519   |        |
| 3.440743718                        | 0.046354347                                            | 1 AC004585.1 | 17            |        |
| 40517026                           | 40527002                                               | + 1198       | lincRNA novel |        |
| transcript                         | - 12                                                   | 13 6         | 0 0           | 3      |
|                                    | 0.547796358                                            | 0.4784323    | 0.232004756   | 0      |
|                                    | 0.116898913                                            |              |               |        |
| ENSG00000140332                    | 558.8124894                                            | 656.2814077  | 804.7280965   |        |
| 831.7907678                        | 918.4291768                                            | 859.5447951  | 673.2739979   |        |
| 869.9215799                        | -0.368969505                                           | 0.046368937  | 0.178011539   | TLE3   |
| 15                                 | 70047790                                               | 70098176     | - 12634       |        |
| protein_coding                     | transducin like enhancer of split 3 [Source:HGNC       |              |               |        |
| Symbol;Acc:HGNC:11839]             | -                                                      | 483 708      | 823 828       | 1005   |
| 876                                | 2.090744538                                            | 2.470736     | 3.017598245   |        |
| 3.16876973                         | 3.466440794                                            | 3.23675084   |               |        |
| ENSG00000204390                    | 31.23796524                                            | 29.66243651  | 31.28954932   |        |
| 71.32505376                        | 53.91773277                                            | 60.83536221  | 30.72998369   |        |
| 62.02604958                        | -1.013068229                                           | 0.046399899  | 0.178085678   | HSPA1L |
| 6                                  | 31809619                                               | 31815065     | - 2544        |        |
| protein_coding                     | heat shock protein family A (Hsp70) member 1 like      |              |               |        |
| [Source:HGNC Symbol;Acc:HGNC:5234] | -                                                      |              | 27 32         | 32     |
| 71                                 | 59 62                                                  | 0.580418665  | 0.554583353   |        |
| 0.582686998                        | 1.349405445                                            | 1.010633064  | 1.137681297   |        |
| ENSG00000186106                    | 378.326468                                             | 489.4302024  | 396.986157    |        |
| 548.4997092                        | 583.0426018                                            | 531.8188116  | 421.5809424   |        |
| 554.4537075                        | -0.39431672                                            | 0.046422047  | 0.178125961   |        |
| ANKRD46 8                          | 100509752                                              | 100559784    | - 5820        |        |
| protein_coding                     | ankyrin repeat domain 46 [Source:HGNC                  |              |               |        |
| Symbol;Acc:HGNC:27229]             | -                                                      | 327 528      | 406 546       | 638    |
| 542                                | 3.072695191                                            | 3.999860968  | 3.231510004   |        |
| 4.535977321                        | 4.777011555                                            | 4.347327293  |               |        |
| ENSG00000090006                    | 1468.184366                                            | 2276.592002  | 2065.110255   |        |
| 2603.866751                        | 2190.522126                                            | 2589.427756  | 1936.628874   |        |
| 2461.272211                        | -0.345181347                                           | 0.046469151  | 0.178261959   | LTBP4  |
| 19                                 | 40592883                                               | 40629818     | + 8108        |        |
| protein_coding                     | latent transforming growth factor beta binding protein |              |               |        |

|                                                     |                                                       |                        |                               |                             |             |
|-----------------------------------------------------|-------------------------------------------------------|------------------------|-------------------------------|-----------------------------|-------------|
| 4                                                   | [Source:HGNC Symbol;Acc:HGNC:6717]                    | -                      | 1269                          | 2456                        | 2112        |
|                                                     | 2592                                                  | 2397                   | 2639                          | 8.55938566                  | 13.35514416 |
| 12.06653646                                         |                                                       | 15.45690272            |                               | 12.88287793                 | 15.19398475 |
| ENSG00000263815                                     |                                                       | 2.313923351            |                               | 17.61207168                 | 0 0 0       |
|                                                     | 0                                                     | 6.641998343            | 0                             | 5.228088844                 | 0.046482281 |
|                                                     | 1                                                     | RN7SL426P              | 17                            | 21229334                    | 21229628    |
|                                                     | -                                                     | 295                    | misc_RNA                      | "RNA, 7SL, cytoplasmic 426, |             |
| pseudogene                                          | [Source:HGNC Symbol;Acc:HGNC:46442]"                  | -                      |                               | 2                           | 19          |
|                                                     | 0                                                     | 0                      | 0                             | 0.370768383                 | 2.839654763 |
|                                                     | 0                                                     | 0                      | 0                             | 0                           | 0           |
| ENSG00000153317                                     |                                                       | 3386.426825            |                               | 2893.941462                 | 3624.698729 |
|                                                     | 3152.366461                                           | 2405.279197            |                               | 2447.151506                 | 3301.689005 |
|                                                     | 2668.265721                                           | 0.307323267            |                               | 0.046485423                 | 0.178279643 |
|                                                     | 8                                                     | 130052104              |                               | 130443660                   | - 8280      |
| protein_coding                                      | "ArfGAP with SH3 domain, ankyrin repeat and PH domain |                        |                               |                             |             |
| 1                                                   | [Source:HGNC Symbol;Acc:HGNC:2720]"                   | -                      | 2927                          | 3122                        | 3707        |
|                                                     | 3138                                                  | 2632                   | 2494                          | 19.33245903                 | 16.62403788 |
| 20.73932919                                         |                                                       | 18.32414919            |                               | 13.85205304                 | 14.06086855 |
| ENSG00000240135                                     |                                                       | 0                      | 0                             | 0                           | 15.06867333 |
|                                                     | 4.906077597                                           | 0                      | 6.658250309                   | -5.153158626                | 0.046521611 |
|                                                     | 1                                                     | PSMD12P 3              | 72876737                      | 72878102                    | -           |
|                                                     | 1366                                                  | unprocessed_pseudogene | "proteasome 26S subunit, non- |                             |             |
| ATPase, 12                                          | pseudogene [Source:HGNC Symbol;Acc:HGNC:30153]"       | -                      |                               |                             |             |
|                                                     | 0                                                     | 0                      | 0                             | 15                          | 0 5 0       |
|                                                     | 0                                                     | 0.530935514            | 0                             | 0.170869812                 |             |
| ENSG00000115896                                     |                                                       | 13.88354011            |                               | 14.83121825                 | 18.57816991 |
|                                                     | 31.14192488                                           | 70.36721056            |                               | 23.54917247                 | 15.76430942 |
|                                                     | 41.68610264                                           | -1.403247275           |                               | 0.046562271                 | 0.178529581 |
|                                                     | 2                                                     | 197804702              |                               | 198572581                   | + 8013      |
| protein_coding                                      | phospholipase C like 1 (inactive) [Source:HGNC        |                        |                               |                             |             |
| Symbol;Acc:HGNC:9063]                               | -                                                     | 12                     | 16                            | 19                          | 31 77       |
|                                                     | 24                                                    | 0.081899418            |                               | 0.088035695                 | 0.109840099 |
|                                                     | 0.187054331                                           | 0.418749383            |                               | 0.139817694                 |             |
| ENSG00000124224                                     |                                                       | 481.2960571            |                               | 435.6670362                 | 355.9186235 |
|                                                     | 293.3368408                                           | 294.2628805            |                               | 348.3315094                 | 424.2939056 |
|                                                     | 311.9770769                                           | 0.443005876            |                               | 0.046676551                 | 0.178860739 |
| PPP4R1L 20                                          |                                                       | 58228940               |                               | 58309439                    | - 9251      |
| transcribed_unprocessed_pseudogene                  | protein phosphatase 4                                 |                        |                               |                             |             |
| regulatory subunit 1 like (pseudogene) [Source:HGNC |                                                       |                        |                               |                             |             |
| Symbol;Acc:HGNC:15755]                              | -                                                     | 416                    | 470                           | 364                         | 292 322     |
|                                                     | 355                                                   | 2.459231213            |                               | 2.239974813                 | 1.822699853 |
|                                                     | 1.526143555                                           | 1.516791159            |                               | 1.791371696                 |             |
| ENSG00000025796                                     |                                                       | 2232.936034            |                               | 2004.995318                 | 2357.471981 |
|                                                     | 1915.730669                                           | 1773.802022            |                               | 1769.131582                 | 2198.467778 |
|                                                     | 1819.554758                                           | 0.27285176             |                               | 0.046682554                 | 0.178860739 |
|                                                     | 6                                                     | 107867756              |                               | 107958189                   | - 8587      |
| protein_coding                                      | "SEC63 homolog, protein translocation regulator       |                        |                               |                             |             |
| [Source:HGNC Symbol;Acc:HGNC:21082]"                | -                                                     |                        | 1930                          | 2163                        | 2411        |
|                                                     | 1907                                                  | 1941                   | 1803                          | 12.29166057                 | 11.10577868 |
| 13.00643286                                         |                                                       | 10.73767974            |                               | 9.850146057                 | 9.801675032 |

|                                                                                   |              |             |                          |                                |                 |             |
|-----------------------------------------------------------------------------------|--------------|-------------|--------------------------|--------------------------------|-----------------|-------------|
| ENSG00000199906                                                                   | 0            | 0           | 0.977798416              | 0                              | 22.84649694     |             |
|                                                                                   | 2.943646558  | 0.325932805 | 8.596714498              |                                | -4.564460808    |             |
|                                                                                   | 0.046682609  | 1           | RNU5B-2P                 | 3                              | 40498891        |             |
|                                                                                   | 40499003     | -           | 113 snRNA                |                                | "RNA, U5B small |             |
| nuclear 2, pseudogene [Source:HGNC Symbol;Acc:HGNC:34182]"                        |              |             |                          |                                |                 | -           |
|                                                                                   | 0            | 0           | 1                        | 0                              | 25              | 3           |
|                                                                                   | 0            | 0           | 0                        | 0                              | 0               | 0           |
|                                                                                   | 0.409943507  | 0           | 9.640957379              | 1.239335378                    |                 |             |
| ENSG00000104951                                                                   | 30.08100357  |             | 71.37523785              | 60.6235018                     |                 |             |
| 102.4669786                                                                       | 133.4235421  |             | 72.60994844              | 54.02658107                    |                 |             |
| 102.8334897                                                                       | -0.923937139 |             | 0.046683741              | 0.178860739                    |                 | IL4I1       |
|                                                                                   | 19           | 49889654    | 49929539                 | -                              | 2563            |             |
| protein_coding interleukin 4 induced 1 [Source:HGNC Symbol;Acc:HGNC:19094]        |              | -           | 26                       | 77                             | 62              | 102         |
|                                                                                   | 74           | 0.554778286 | 1.324573545              | 1.120586895                    |                 | 146         |
|                                                                                   | 1.924211395  | 2.482349042 | 1.347811474              |                                |                 |             |
| ENSG00000138079                                                                   | 8.09873173   |             | 0.926951141              | 7.822387329                    |                 | 0           |
|                                                                                   | 0            | 0           | 5.6160234                | 0                              | 4.979553444     |             |
| 0.046696803                                                                       | 1            | SLC3A1      | 2                        | 44275458                       | 44321494        |             |
|                                                                                   | +            | 6541        | protein_coding           | solute carrier family 3 member |                 |             |
| 1 [Source:HGNC Symbol;Acc:HGNC:11025]                                             |              | -           | 7                        | 1                              |                 | 8           |
|                                                                                   | 0            | 0           | 0.058525968              | 0.006740464                    |                 |             |
| 0.056656311                                                                       | 0            | 0           | 0                        |                                |                 |             |
| ENSG00000260953                                                                   | 4.627846703  |             | 5.561706845              | 5.866790497                    |                 | 0           |
|                                                                                   | 0            | 0           | 5.352114682              | 0                              | 4.913680816     |             |
| 0.046699344                                                                       | 1            | AC009093.4  | 16                       | 29262273                       |                 |             |
| 29264479                                                                          | -            | 561         | lincRNA novel transcript |                                |                 | -           |
|                                                                                   | 4            | 6           | 6                        | 0                              | 0               | 0.389934663 |
|                                                                                   | 0.471544135  | 0.495439747 | 0                        | 0                              | 0               |             |
| ENSG00000251333                                                                   | 38.1797353   |             | 14.83121825              | 20.53376674                    |                 | 0           |
|                                                                                   | 2.741579632  | 12.75580175 | 24.51490676              | 5.165793795                    |                 |             |
|                                                                                   | 2.244627461  | 0.046717825 | 0.178946479              | RTN3P1                         | 4               |             |
|                                                                                   | 145375543    | 145376253   | +                        | 711                            |                 |             |
| processed_pseudogene reticulon 3 pseudogene 1 [Source:HGNC Symbol;Acc:HGNC:19212] |              | -           | 33                       | 16                             | 21              | 0           |
|                                                                                   | 13           | 2.538277218 | 0.992165999              | 1.368208077                    |                 | 3           |
|                                                                                   | 0.183869736  | 0.85353196  |                          |                                |                 | 0           |
| ENSG00000119401                                                                   | 558.8124894  |             | 516.3117855              | 647.3025515                    |                 |             |
| 768.5023398                                                                       | 709.1552649  |             | 725.1182689              | 574.1422754                    |                 |             |
| 734.2586245                                                                       | -0.354797619 |             | 0.046785623              | 0.179120643                    |                 | TRIM32      |
|                                                                                   | 9            | 116687302   | 116701300                | +                              | 3780            |             |
| protein_coding tripartite motif containing 32 [Source:HGNC Symbol;Acc:HGNC:16380] |              | -           | 483                      | 557                            | 662             | 765         |
|                                                                                   | 739          | 6.9879541   | 6.496767924              | 8.112760317                    |                 | 776         |
|                                                                                   | 9.785225802  | 8.945992282 | 9.126382661              |                                |                 |             |
| ENSG00000275160                                                                   | 37.02277362  |             | 33.37024107              | 40.08973506                    |                 |             |
| 24.10987733                                                                       | 9.138598774  |             | 4.906077597              | 36.82758325                    |                 |             |
| 12.71818457                                                                       | 1.537026365  |             | 0.04679492               | 0.179120643                    |                 |             |
| AL354718.1                                                                        | 9            | 41479960    | 41480548                 | +                              |                 | 589         |
| processed_pseudogene ribosomal protein L7a (RPL7A)                                |              | -           | 32                       | 36                             | 41              | 24          |
| pseudogene                                                                        |              |             | 36                       | 41                             | 24              | 10          |
|                                                                                   |              |             |                          |                                |                 | 5           |

|                                  |                                                        |                       |             |                |            |
|----------------------------------|--------------------------------------------------------|-----------------------|-------------|----------------|------------|
|                                  | 2.971182964                                            | 2.69476665            | 3.224564124 | 1.970140339    |            |
|                                  | 0.739849361                                            | 0.396278714           |             |                |            |
| ENSG00000119013                  | 350.5593877                                            | 431.0322805           | 400.8973506 |                |            |
| 179.8195017                      | 164.4947779                                            | 415.0541647           | 394.1630063 |                |            |
| 253.1228148                      | 0.639785034                                            | 0.046798446           | 0.179120643 |                | NDUFB3     |
| 2                                | 201071433                                              | 201085750             | +           | 1103           |            |
| protein_coding                   | NADH:ubiquinone oxidoreductase subunit B3 [Source:HGNC |                       |             |                |            |
| Symbol;Acc:HGNC:7698]            | -                                                      | 303                   | 465         | 410            | 179        |
| 423                              | 15.02317855                                            | 18.58708985           | 17.21911395 |                | 180        |
| 7.846549792                      | 7.111407909                                            | 17.90238492           |             |                |            |
| ENSG00000152760                  | 30.08100357                                            | 6.488657986           | 2.933395248 |                | 0          |
| 0                                | 3.924862078                                            | 13.1676856            | 1.308287359 |                |            |
| 3.332805194                      | 0.046814799                                            | 1                     | TCTEX1D1    | 1              |            |
| 66752459                         | 66778787                                               | +                     | 3100        | protein_coding | Tctex1     |
| domain containing 1 [Source:HGNC | Symbol;Acc:HGNC:26882]                                 | -                     |             |                | 26         |
| 7                                | 3                                                      | 0                     | 0           | 4              | 0.45867637 |
| 0.099556657                      | 0.044829306                                            | 0                     | 0           | 0.060234365    |            |
| ENSG00000133895                  | 1172.002177                                            | 1623.091448           | 1571.322055 |                |            |
| 1777.098875                      | 1559.958811                                            | 2287.213376           | 1455.471893 |                |            |
| 1874.75702                       | -0.364557799                                           | 0.046901646           | 0.179470008 |                | MEN1       |
| 11                               | 64803510                                               | 64811294              | -           | 4246           |            |
| protein_coding                   | menin 1 [Source:HGNC                                   | Symbol;Acc:HGNC:7010] |             |                | -          |
| 1013                             | 1751                                                   | 1607                  | 1769        | 1707           | 2331       |
| 18.18193556                      | 17.53227777                                            | 20.14415524           | 17.51911361 |                |            |
| 25.62762258                      |                                                        |                       |             |                |            |
| ENSG00000272047                  | 426.9188583                                            | 412.4932577           | 470.3210382 |                |            |
| 616.8110283                      | 557.4545252                                            | 526.912734            | 436.5777181 |                |            |
| 567.0594292                      | -0.377110371                                           | 0.046913204           | 0.179470008 |                | GTF2H5     |
| 6                                | 158168350                                              | 158199344             | +           | 7565           |            |
| protein_coding                   | general transcription factor IIH subunit 5             |                       |             |                |            |
| [Source:HGNC                     | Symbol;Acc:HGNC:21157]                                 | -                     | 369         | 445            | 481        |
| 614                              | 610                                                    | 537                   | 2.667547408 | 2.59349274     |            |
| 2.94536146                       | 3.924286038                                            | 3.513819919           | 3.313686277 |                |            |
| ENSG00000285584                  | 61.31896881                                            | 83.42560268           | 55.73450972 |                |            |
| 74.33878843                      | 134.337402                                             | 147.1823279           | 66.8263604  |                |            |
| 118.6195061                      | -0.826906356                                           | 0.046938638           | 0.179502308 |                |            |
| AL158800.1                       | 14                                                     | 97180525              | 97217778    | +              | 1320       |
| lincRNA                          | novel transcript                                       | -                     | 53          | 90             | 57         |
| 74                               | 147                                                    | 150                   | 2.195819569 | 3.006093858    |            |
| 2.000337977                      | 2.710559875                                            | 4.852907364           | 5.304730972 |                |            |
| ENSG00000176124                  | 166.6024813                                            | 139.9696223           | 147.6475608 |                |            |
| 98.44866576                      | 77.67808958                                            | 110.8773537           | 151.4065548 |                |            |
| 95.66803635                      | 0.662261953                                            | 0.046945132           | 0.179502308 |                | DLEU1      |
| 13                               | 50082171                                               | 50723236              | +           | 12394          |            |
| processed_transcript             | deleted in lymphocytic leukemia 1 [Source:HGNC         |                       |             |                |            |
| Symbol;Acc:HGNC:13747]           | -                                                      | 144                   | 151         | 151            | 98         |
| 113                              | 0.635397809                                            | 0.537154741           | 0.564375187 |                | 85         |
| 0.382310125                      | 0.298858789                                            | 0.425611141           |             |                |            |
| ENSG00000184208                  | 388.739123                                             | 520.9465412           | 457.6096588 |                |            |
| 655.989579                       | 543.7466271                                            | 600.5038979           | 455.7651077 |                |            |

|                                        |                                                       |               |                       |                |             |
|----------------------------------------|-------------------------------------------------------|---------------|-----------------------|----------------|-------------|
| 600.0800347                            | -0.395400105                                          | 0.046995454   | 0.179649787           |                |             |
| C22orf46                               | 22                                                    | 41688939      | 41698136              | +              | 5341        |
|                                        | protein_coding                                        | chromosome 22 | open reading frame 46 |                |             |
| [Source:HGNC Symbol;Acc:HGNC:26294]    |                                                       | -             | 336                   | 562            | 468         |
|                                        | 653                                                   | 595           | 612                   | 3.440419592    | 4.639249136 |
| 4.059062429                            | 5.911420044                                           | 4.85459479    | 5.349028108           |                |             |
| ENSG00000088280                        | 84.45820233                                           | 88.98730952   | 211.2044579           |                |             |
| 106.4852915                            | 51.17615314                                           | 35.3237587    | 128.2166566           |                |             |
| 64.32840112                            | 0.997180915                                           | 0.047016542   | 0.179655785           |                | ASAP3       |
|                                        | 1                                                     | 23428563      | 23484568              | -              | 4988        |
| protein_coding                         | "ArfGAP with SH3 domain, ankyrin repeat and PH domain |               |                       |                |             |
| 3 [Source:HGNC Symbol;Acc:HGNC:14987]" |                                                       | -             | 73                    | 96             | 216         |
|                                        | 106                                                   | 56            | 36                    | 0.800370601    | 0.848552556 |
| 2.005994612                            | 1.027497176                                           | 0.489237998   | 0.336916354           |                |             |
| ENSG00000121864                        | 1608.176729                                           | 1249.530138   | 1241.803989           |                |             |
| 777.5435438                            | 1246.504873                                           | 1104.848675   | 1366.503619           |                |             |
| 1042.965697                            | 0.389020476                                           | 0.047028875   | 0.179655785           |                | ZNF639      |
|                                        | 3                                                     | 179322991     | 179338583             | +              | 6859        |
| protein_coding                         | zinc finger protein 639 [Source:HGNC                  |               |                       |                |             |
| Symbol;Acc:HGNC:30950]                 | zf-C2H2                                               | 1390          | 1348                  | 1270           | 774         |
|                                        | 1126                                                  | 11.08277994   | 8.664889871           | 8.57719678     | 1364        |
| 5.4560881                              | 8.66586991                                            | 7.663437565   |                       |                |             |
| ENSG00000141994                        | 867.7212568                                           | 1477.560119   | 1356.206403           |                |             |
| 1795.181283                            | 1432.018428                                           | 1626.855331   | 1233.82926            |                |             |
| 1618.018347                            | -0.390094659                                          | 0.047032279   | 0.179655785           |                | DUS3L       |
|                                        | 19                                                    | 5784832       | 5791238               | -              | 3642        |
| dihydrouridine synthase 3 like         | [Source:HGNC Symbol;Acc:HGNC:26920]                   |               |                       |                |             |
|                                        | -                                                     | 750           | 1594                  | 1387           | 1787        |
|                                        |                                                       |               |                       | 1567           | 1658        |
| 11.26201327                            | 19.29666839                                           | 17.64164081   | 23.72388595           |                |             |
| 18.74941202                            | 21.25155046                                           |               |                       |                |             |
| ENSG00000103522                        | 42.807582                                             | 43.56670362   | 151.5587545           |                |             |
| 47.21517644                            | 17.36333767                                           | 37.28618974   | 79.31101338           |                |             |
| 33.95490128                            | 1.227346561                                           | 0.047080473   | 0.17979495            |                | IL21R       |
|                                        | 16                                                    | 27402162      | 27452042              | +              | 5467        |
| protein_coding                         | interleukin 21 receptor [Source:HGNC                  |               |                       |                |             |
| Symbol;Acc:HGNC:6006]                  |                                                       | -             | 37                    | 47             | 155         |
|                                        | 38                                                    | 0.370124099   | 0.379037991           | 1.313363916    | 19          |
| 0.415671263                            | 0.151447854                                           | 0.32447449    |                       |                |             |
| ENSG00000167447                        | 926.7263022                                           | 983.4951604   | 875.1295825           |                |             |
| 1157.274112                            | 1172.482223                                           | 1098.961382   | 928.4503484           |                |             |
| 1142.905905                            | -0.299742121                                          | 0.047135496   | 0.179960122           |                | SMG8        |
|                                        | 17                                                    | 59209400      | 59215247              | +              | 3752        |
| protein_coding                         | "SMG8, nonsense mediated mRNA decay factor            |               |                       |                |             |
| [Source:HGNC Symbol;Acc:HGNC:25551]"   |                                                       | -             | 801                   | 1061           | 895         |
|                                        | 1152                                                  | 1283          | 1120                  | 11.67520189    | 12.46770484 |
| 11.05000975                            | 14.84536452                                           | 14.90124051   | 13.93481569           |                |             |
| ENSG00000100156                        | 1.156961676                                           | 0             | 2.933395248           | 18.082408      |             |
|                                        | 7.310879019                                           | 8.830939675   | 1.363452308           | 11.40807556    |             |
|                                        | -3.068235707                                          | 0.047152629   | 1                     | SLC16A8        | 22          |
| 38078134                               | 38084093                                              | -             | 2203                  | protein_coding | solute      |

```

carrier family 16 member 8 [Source:HGNC Symbol;Acc:HGNC:16270] -
    1      0      3      18      8      9      0.024824483
    0      0.063082546      0.395056512      0.158246491
0.190710256
ENSG00000279236 10.41265508      0      8.800185745      0      0
    0      6.404280276      0      5.16883812      0.047164902
    1      AC064801.2      18      62551203      62552505
    +      1303      TEC      novel transcript      -      9
    0      9      0      0      0      0.377739853      0
    0.319963582      0      0      0
ENSG00000229097 34.70885027      36.15109449      22.48936357
14.06409511      2.741579632      12.75580175      31.11643611
9.853825498      1.663871718      0.047176897      0.180073213
CALM2P2 10      70163685      70164124      +      440
processed_pseudogene      calmodulin 2 pseudogene 2 [Source:HGNC
Symbol;Acc:HGNC:1447] -      30      39      23      14      3
    13      3.728750211      3.907922015      2.421461762
1.538425875      0.297116777      1.379230053
ENSG00000106633 0      0.926951141      0      11.05036044      0
    13.73701727      0.308983714      8.262459238      -4.503017
    0.047180863      1      GCK      7      44144271
44198170      -      4122      protein_coding      glucokinase
[Source:HGNC Symbol;Acc:HGNC:4195] -      0      1      0
    11      0      14      0      0.010696113      0
0.129028579      0      0.158549941
ENSG00000229191 5.784808379      7.415609127      2.933395248      0
    0      0      5.377937585      0      4.920103021
0.047207897      1      AL358473.1      1      201023949
201028792      +      3508      antisense      "novel transcript,
antisense KIF21B" -      5      8      3      0      0
    0      0.077948028      0.100545899      0.039615407      0
    0      0
ENSG00000126878 20.82531016      18.53902282      25.42275882      0
    6.397019142      7.849724156      21.59569727      4.748914433
    2.180084276      0.04722163      0.180155084      AIF1L      9
    131096476      131123152      +      5299      protein_coding
allograft inflammatory factor 1 like [Source:HGNC
Symbol;Acc:HGNC:28904] -      18      20      26      0      7
    8      0.185769024      0.166406403      0.227290814      0
    0.057565558      0.070476139
ENSG00000160211 1777.093134      2356.3098      2244.047365
1713.810447      1698.865512      1775.018875      2125.816766
1729.231611      0.298387259      0.047221916      0.180155084      G6PD
    X      154531390      154547572      -      3995
protein_coding      glucose-6-phosphate dehydrogenase [Source:HGNC
Symbol;Acc:HGNC:4057] -      1536      2542      2295      1706      1859
    1809      21.02660445      28.05386615      26.61143916
20.64730911      20.27781721      21.13819106
ENSG00000117335 3093.715521      2600.09795      3021.397106
2222.127027      2428.125694      2563.916152      2905.070192

```

|                                                                 |                                                  |             |                |                    |
|-----------------------------------------------------------------|--------------------------------------------------|-------------|----------------|--------------------|
| 2404.722958                                                     | 0.272459488                                      | 0.047234822 | 0.180159362    | CD46               |
| 1                                                               | 207752057                                        | 207795513   | + 8708         |                    |
| protein_coding                                                  | CD46 molecule [Source:HGNC Symbol;Acc:HGNC:6953] |             |                |                    |
| -                                                               | 2674 2805                                        | 3090 2212   | 2657 2613      |                    |
| 16.79336376                                                     | 14.20196386                                      | 16.43775544 | 12.28196679    |                    |
| 13.29632836                                                     | 14.00770623                                      |             |                |                    |
| ENSG00000237781                                                 | 6.941770054                                      | 7.415609127 | 1.955596832    | 0                  |
| 0                                                               | 0                                                | 5.437658671 | 0              | 4.935120551        |
| 0.047243619                                                     | 1                                                | AL356356.1  | 1              | 150548562          |
| 150557724                                                       | -                                                | 665         | antisense      | "novel transcript, |
| antisense to ADAMTSL4"                                          | -                                                | 6           | 8              | 2 0 0              |
| 0                                                               | 0.493428599                                      | 0.530398515 | 0.139319147    | 0                  |
| 0                                                               | 0                                                |             |                |                    |
| ENSG00000143353                                                 | 664.0960019                                      | 517.2387366 | 446.8538762    |                    |
| 646.948375                                                      | 801.4551125                                      | 702.5503119 | 542.7295382    |                    |
| 716.9845998                                                     | -0.403189135                                     | 0.047268702 | 0.180229755    |                    |
| LYPLAL1 1                                                       | 219173844                                        | 219212865   | + 2966         |                    |
| protein_coding                                                  | lysophospholipase like 1 [Source:HGNC            |             |                |                    |
| Symbol;Acc:HGNC:20440]                                          | -                                                | 574 558     | 457 644        | 877                |
| 716                                                             | 10.58364973                                      | 8.294629849 | 7.13752281     |                    |
| 10.49822647                                                     | 12.88507778                                      | 11.26906571 |                |                    |
| ENSG00000151694                                                 | 1047.050317                                      | 899.1426066 | 1121.534783    |                    |
| 789.5984825                                                     | 892.8411002                                      | 748.6674414 | 1022.575902    |                    |
| 810.369008                                                      | 0.335102341                                      | 0.047276857 | 0.180229755    | ADAM17             |
| 2                                                               | 9488486 9556732                                  | - 10750     | protein_coding | ADAM               |
| metallopeptidase domain 17 [Source:HGNC Symbol;Acc:HGNC:195]    |                                                  |             |                | -                  |
| 905                                                             | 970 1147                                         | 786 977     | 763            | 4.603994834        |
| 3.978297235                                                     | 4.942622131                                      | 3.535210661 | 3.960451481    |                    |
| 3.313310292                                                     |                                                  |             |                |                    |
| ENSG00000127870                                                 | 2313.923351                                      | 1854.829233 | 1656.390517    |                    |
| 2408.978576                                                     | 2393.399019                                      | 2387.297359 | 1941.714367    |                    |
| 2396.558318                                                     | -0.304162794                                     | 0.047336618 | 0.180393263    | RNF6               |
| 13                                                              | 26132115                                         | 26222493    | - 4621         |                    |
| protein_coding                                                  | ring finger protein 6 [Source:HGNC               |             |                |                    |
| Symbol;Acc:HGNC:10069]                                          | -                                                | 2000 2001   | 1694 2398      | 2619               |
| 2433                                                            | 23.66948125                                      | 19.09172096 | 16.9816503     |                    |
| 25.09079527                                                     | 24.69779194                                      | 24.57831898 |                |                    |
| ENSG00000285533                                                 | 24.29619519                                      | 52.83621503 | 45.95652556    |                    |
| 88.40288354                                                     | 56.6593124                                       | 100.083983  | 41.02964526    |                    |
| 81.71539297                                                     | -0.98769037                                      | 0.047343349 | 0.180393263    |                    |
| AP001362.2                                                      | 11                                               | 65663086    | 65671716       | + 824              |
| lincRNA uncharacterized LOC105369347 [Source:NCBI               |                                                  |             |                |                    |
| gene;Acc:105369347]                                             | -                                                | 21 57       | 47 88          | 62                 |
| 102                                                             | 1.393756147                                      | 3.049871924 | 2.642245105    |                    |
| 5.163648567                                                     | 3.278861524                                      | 5.778551603 |                |                    |
| ENSG00000004848                                                 | 3.470885027                                      | 0           | 0.977798416    | 13.05951689        |
| 6.397019142                                                     | 15.69944831                                      | 1.482894481 | 11.71866145    |                    |
| -3.030099593                                                    | 0.047353831                                      | 1           | ARX X          |                    |
| 25003694                                                        | 25016420                                         | -           | 3097           | protein_coding     |
| aristaless related homeobox [Source:HGNC Symbol;Acc:HGNC:18060] |                                                  |             |                |                    |



|                                    |                                     |                       |                        |             |                |             |        |      |      |
|------------------------------------|-------------------------------------|-----------------------|------------------------|-------------|----------------|-------------|--------|------|------|
| Homeobox                           | 3                                   | 0                     | 1                      | 13          | 7              | 16          |        |      |      |
| 0.052975463                        | 0                                   | 0.014957577           |                        | 0.202956686 |                | 0.098495283 |        |      |      |
|                                    | 0.241170849                         |                       |                        |             |                |             |        |      |      |
| ENSG00000145868                    | 1233.321146                         |                       | 1096.5832              |             | 1057.977886    |             |        |      |      |
| 1481.752877                        | 1538.026174                         |                       | 1203.951442            |             | 1129.294077    |             |        |      |      |
| 1407.910165                        | -0.318634431                        |                       | 0.047370141            |             | 0.180450374    |             | FBX038 |      |      |
| 5                                  | 148383935                           |                       | 148442836              |             | + 8722         |             |        |      |      |
| protein_coding                     | F-box protein 38                    | [Source:HGNC          | Symbol;Acc:HGNC:28844] |             |                |             |        |      |      |
| -                                  | 1066 1183                           | 1082                  | 1475                   | 1683        | 1227           |             |        |      |      |
| 6.683990671                        | 5.980019777                         | 5.746635273           |                        | 8.176682877 |                |             |        |      |      |
| 8.408656883                        | 6.567113408                         |                       |                        |             |                |             |        |      |      |
| ENSG00000137100                    | 937.1389573                         |                       | 1067.847714            |             | 1064.822475    |             |        |      |      |
| 772.5206527                        | 785.0056347                         |                       | 899.7746314            |             | 1023.269716    |             |        |      |      |
| 819.1003063                        | 0.321549413                         |                       | 0.04739357             |             | 0.180494645    |             | DCTN3  |      |      |
| 9                                  | 34613545                            |                       | 34620523               |             | - 3740         |             |        |      |      |
| protein_coding                     | dynactin subunit 3                  | [Source:HGNC          | Symbol;Acc:HGNC:2713]  |             |                |             |        |      |      |
| -                                  | 810 1152                            | 1089                  | 769                    | 859         | 917            |             |        |      |      |
| 11.84426538                        | 13.58047107                         | 13.4883471            |                        | 9.941592418 |                |             |        |      |      |
| 10.00875733                        | 11.44573718                         |                       |                        |             |                |             |        |      |      |
| ENSG00000213024                    | 2949.095311                         |                       | 3099.724615            |             | 3262.913315    |             |        |      |      |
| 3565.24811                         | 3820.848147                         |                       | 3641.290793            |             | 3103.91108     |             |        |      |      |
| 3675.795683                        | -0.24388468                         |                       | 0.047446286            |             | 0.180640456    |             | NUP62  |      |      |
| 19                                 | 49906825                            |                       | 49929763               |             | - 6020         |             |        |      |      |
| protein_coding                     | nucleoporin 62                      | [Source:HGNC          | Symbol;Acc:HGNC:8066]  |             |                |             |        |      |      |
| -                                  | 2549 3344                           | 3337                  | 3549                   | 4181        | 3711           |             |        |      |      |
| 23.15624079                        | 24.49084307                         | 25.67805775           |                        | 28.5043226  |                |             |        |      |      |
| 30.26511121                        | 28.77666751                         |                       |                        |             |                |             |        |      |      |
| ENSG00000144802                    | 800.6174796                         |                       | 948.2710171            |             | 780.2831361    |             |        |      |      |
| 772.5206527                        | 632.3910352                         |                       | 539.6685357            |             | 843.0572109    |             |        |      |      |
| 648.1934079                        | 0.379709703                         |                       | 0.04745549             |             | 0.180640456    |             | NFKBIZ |      |      |
| 3                                  | 101827991                           |                       | 101861022              |             | + 5902         |             |        |      |      |
| protein_coding                     | NFKB inhibitor zeta                 | [Source:HGNC          | Symbol;Acc:HGNC:29805] |             |                |             |        |      |      |
| 550                                | 6.412119419                         | 7.642059004           | 6.263342226            | 798         | 769            | 692         |        |      |      |
| 6.29982305                         | 5.109348039                         | 4.350202966           |                        |             |                |             |        |      |      |
| ENSG00000104856                    | 671.0377719                         |                       | 1130.880392            |             | 750.9491836    |             |        |      |      |
| 1046.770507                        | 1459.434224                         |                       | 960.6099936            |             | 850.9557825    |             |        |      |      |
| 1155.604908                        | -0.440866419                        |                       | 0.047488442            |             | 0.180694909    |             | RELB   |      |      |
| 19                                 | 45001430                            |                       | 45038198               |             | + 3035         |             |        |      |      |
| protein_coding                     | "RELB proto-oncogene, NF-kB subunit | [Source:HGNC          | Symbol;Acc:HGNC:9956]" | RHD         | 580            | 1220        | 768    | 1042 | 1597 |
| 979                                | 10.45114831                         | 17.7229125            | 11.72208808            |             |                |             |        |      |      |
| 16.60008226                        | 22.93004032                         | 15.05809498           |                        |             |                |             |        |      |      |
| ENSG00000170296                    | 223.2936034                         |                       | 183.5363259            |             | 260.0943787    |             |        |      |      |
| 337.5382826                        | 345.4390337                         |                       | 263.9469747            |             | 222.3081027    |             |        |      |      |
| 315.6414303                        | -0.506325234                        |                       | 0.047493435            |             | 0.180694909    |             |        |      |      |
| GABARAP 17                         | 7240014 7242770                     | -                     | 2266                   |             | protein_coding | GABA        |        |      |      |
| type A receptor-associated protein | [Source:HGNC                        | Symbol;Acc:HGNC:4067] |                        |             |                |             |        |      |      |
| -                                  | 193 198                             | 266                   | 336                    | 378         | 269            |             |        |      |      |
| 4.657920976                        | 3.852469798                         | 5.437811977           |                        | 7.1693633   |                |             |        |      |      |

|                               |                                                       |             |                |             |  |  |  |
|-------------------------------|-------------------------------------------------------|-------------|----------------|-------------|--|--|--|
| 7.269264845                   | 5.541641287                                           |             |                |             |  |  |  |
| ENSG00000139324               | 1401.080589                                           | 1101.217955 | 1230.070408    |             |  |  |  |
| 1014.624004                   | 1083.837815                                           | 866.4133037 | 1244.122984    |             |  |  |  |
| 988.2917075                   | 0.331431562                                           | 0.047545549 | 0.180848172    | TMTC3       |  |  |  |
| 12                            | 88142296                                              | 88199887    | + 7327         |             |  |  |  |
| protein_coding                | transmembrane and tetratricopeptide repeat containing |             |                |             |  |  |  |
| 3 [Source:HGNC                | Symbol;Acc:HGNC:26899]                                | -           | 1211 1188      | 1258        |  |  |  |
| 1010                          | 1186 883                                              | 9.038839282 | 7.148652842    |             |  |  |  |
| 7.953474727                   | 6.664942373                                           | 7.053701794 | 5.625751542    |             |  |  |  |
| ENSG00000167555               | 94.87085741                                           | 140.8965734 | 64.53469547    |             |  |  |  |
| 182.8332364                   | 216.5847909                                           | 112.8397847 | 100.1007088    |             |  |  |  |
| 170.752604                    | -0.769583709                                          | 0.047608326 | 0.18104191     | ZNF528      |  |  |  |
| 19                            | 52397849                                              | 52418412    | + 8530         |             |  |  |  |
| protein_coding                | zinc finger protein 528 [Source:HGNC                  |             |                |             |  |  |  |
| Symbol;Acc:HGNC:29384]        | zf-C2H2                                               | 82 152      | 66 182         | 237         |  |  |  |
| 115                           | 0.525726095                                           | 0.785648914 | 0.358424229    |             |  |  |  |
| 1.031629074                   | 1.210759576                                           | 0.62935378  |                |             |  |  |  |
| ENSG00000110455               | 240.6480285                                           | 224.3221761 | 289.4283312    |             |  |  |  |
| 167.7645631                   | 92.29984762                                           | 219.7922764 | 251.4661786    |             |  |  |  |
| 159.952229                    | 0.653899918                                           | 0.047624292 | 0.181057585    | ACCS        |  |  |  |
| 11                            | 44065925                                              | 44084222    | + 5826         |             |  |  |  |
| protein_coding                | 1-aminocyclopropane-1-carboxylate synthase homolog    |             |                |             |  |  |  |
| (inactive) [Source:HGNC       | Symbol;Acc:HGNC:23989]                                | -           | 208            | 242         |  |  |  |
| 296                           | 167 101                                               | 224         | 1.952484377    | 1.831381588 |  |  |  |
| 2.353551395                   | 1.385948866                                           | 0.75545655  | 1.794831049    |             |  |  |  |
| ENSG00000215251               | 426.9188583                                           | 451.4252056 | 428.2757063    |             |  |  |  |
| 513.3394715                   | 700.930526                                            | 515.1381477 | 435.5399234    |             |  |  |  |
| 576.4693817                   | -0.404723109                                          | 0.047676093 | 0.181209456    |             |  |  |  |
| FASTKD5 20                    | 3146519 3159897                                       | - 2874      | protein_coding | FAST        |  |  |  |
| kinase domains 5 [Source:HGNC | Symbol;Acc:HGNC:25790]                                | -           |                | 369         |  |  |  |
| 487                           | 438 511                                               | 767 525     | 7.021571379    |             |  |  |  |
| 7.4709556                     | 7.05975781                                            | 8.596770894 | 11.62966482    |             |  |  |  |
| 8.527438097                   |                                                       |             |                |             |  |  |  |
| ENSG00000243244               | 96.02781908                                           | 87.13340724 | 162.3145371    |             |  |  |  |
| 32.1465031                    | 85.90282848                                           | 64.76022428 | 115.1585878    |             |  |  |  |
| 60.93651862                   | 0.916787531                                           | 0.047717122 | 0.18132032     | STON1       |  |  |  |
| 2                             | 48529383                                              | 48598513    | + 7709         |             |  |  |  |
| protein_coding                | stonin 1 [Source:HGNC Symbol;Acc:HGNC:17003]          |             |                | -           |  |  |  |
| 83                            | 94 166                                                | 32 94       | 66             | 0.588809434 |  |  |  |
| 0.537605578                   | 0.997499067                                           | 0.20070267  | 0.531359446    |             |  |  |  |
| 0.399661143                   |                                                       |             |                |             |  |  |  |
| ENSG00000227057               | 3240.649654                                           | 4225.970251 | 3746.923531    |             |  |  |  |
| 4574.849223                   | 4155.320863                                           | 4880.565994 | 3737.847812    |             |  |  |  |
| 4536.912027                   | -0.279187057                                          | 0.047806858 | 0.181616163    | WDR46       |  |  |  |
| 6                             | 33279108                                              | 33289527    | - 3115         |             |  |  |  |
| protein_coding                | WD repeat domain 46 [Source:HGNC                      |             |                |             |  |  |  |
| Symbol;Acc:HGNC:13923]        | -                                                     | 2801 4559   | 3832 4554      | 4547        |  |  |  |
| 4974                          | 49.17561167                                           | 64.52759802 | 56.98622719    |             |  |  |  |
| 70.68645335                   | 63.61001543                                           | 74.54075131 |                |             |  |  |  |
| ENSG00000254554               | 15.04050178                                           | 19.46597396 | 2.933395248    |             |  |  |  |

|                        |                                                         |                                                    |                  |             |             |
|------------------------|---------------------------------------------------------|----------------------------------------------------|------------------|-------------|-------------|
| 75.34336665            | 7.310879019                                             | 45.1359139                                         | 12.479957        |             |             |
| 42.59671986            | -1.770070131                                            | 0.047824148                                        | 0.18163671       |             |             |
| AC080023.1             | 11                                                      | 10302657                                           | 10303704         | -           | 803         |
|                        | antisense                                               | novel transcript                                   | -                | 13          | 21          |
|                        | 3                                                       | 75                                                 | 8                | 46          | 0.885365347 |
|                        | 0.173064569                                             | 4.515927225                                        | 0.434143236      | 2.67416575  |             |
| ENSG00000006282        | 652.5263851                                             | 745.2687172                                        | 854.5958157      |             |             |
| 529.412723             | 513.5892511                                             | 679.982355                                         | 750.7969727      |             |             |
| 574.3281097            | 0.387243741                                             | 0.0478405                                          | 0.181653683      |             |             |
| SPATA20 17             | 50543058                                                | 50555852                                           | +                | 5337        |             |
| protein_coding         | spermatogenesis                                         | associated 20                                      | [Source:HGNC     |             |             |
| Symbol;Acc:HGNC:26125] | -                                                       | 564                                                | 804              | 874         | 527         |
|                        | 693                                                     | 5.779318296                                        | 6.641907208      | 7.586067202 | 562         |
| 4.774354129            | 4.588785005                                             | 6.06152733                                         |                  |             |             |
| ENSG00000013288        | 591.2074163                                             | 605.299095                                         | 773.4385472      |             |             |
| 565.577539             | 524.5555696                                             | 374.8243284                                        | 656.6483528      |             |             |
| 488.3191457            | 0.42755953                                              | 0.047859793                                        | 0.181681813      |             | MAN2B2      |
|                        | 4                                                       | 6575175                                            | 6623362          | +           | 8898        |
|                        | mannosidase alpha class 2B member 2                     | [Source:HGNC                                       |                  |             |             |
| Symbol;Acc:HGNC:29623] | -                                                       | 511                                                | 653              | 791         | 563         |
|                        | 382                                                     | 3.140676547                                        | 3.235599338      | 4.118001855 | 574         |
| 3.059265788            | 2.811111609                                             | 2.004088968                                        |                  |             |             |
| ENSG00000236536        | 0                                                       | 0                                                  | 24.10987733      | 0           | 0           |
|                        | 0                                                       | 8.036625776                                        | -5.424868665     | 0.047886284 | 1           |
|                        | AC003986.3                                              | 7                                                  | 19119933         | 19121916    | +           |
|                        | 692                                                     | antisense                                          | novel transcript | -           | 0           |
|                        | 0                                                       | 0                                                  | 24               | 0           | 0           |
|                        | 1.676896907                                             | 0                                                  | 0                |             |             |
| ENSG00000242516        | 0                                                       | 0                                                  | 24.10987733      | 0           | 0           |
|                        | 0                                                       | 8.036625776                                        | -5.424868665     | 0.047886284 | 1           |
|                        | LINC00960                                               | 3                                                  | 75672391         | 75679303    | +           |
|                        | 3181                                                    | lincRNA long intergenic non-protein coding RNA 960 |                  |             |             |
| [Source:HGNC           | Symbol;Acc:HGNC:48710]                                  | -                                                  | 0                | 0           | 0           |
|                        | 24                                                      | 0                                                  | 0                | 0           | 0.364794926 |
|                        | 0                                                       | 0                                                  |                  |             |             |
| ENSG00000154736        | 52.06327541                                             | 79.71779811                                        | 49.86771922      |             |             |
| 88.40288354            | 144.3898606                                             | 92.23425883                                        | 60.54959758      |             |             |
| 108.3423343            | -0.837906082                                            | 0.047909172                                        | 0.181824108      |             |             |
| ADAMTS5 21             | 26917912                                                | 26966513                                           | -                | 9056        |             |
| protein_coding         | ADAM metalloproteinase with thrombospondin type 1 motif |                                                    |                  |             |             |
| 5 [Source:HGNC         | Symbol;Acc:HGNC:221]                                    | -                                                  | 45               | 86          | 51          |
|                        | 88                                                      | 158                                                | 94               | 0.271750788 | 0.418693285 |
| 0.260877256            | 0.469837281                                             | 0.760289987                                        | 0.484548748      |             |             |
| ENSG00000064115        | 1347.860352                                             | 1269.923063                                        | 1387.495953      |             |             |
| 1032.706412            | 1218.175217                                             | 988.0840281                                        | 1335.093123      |             |             |
| 1079.655219            | 0.306032798                                             | 0.047944515                                        | 0.18191308       |             | TM7SF3      |
|                        | 12                                                      | 26973195                                           | 27014434         | -           | 3888        |
| protein_coding         | transmembrane 7 superfamily member 3                    | [Source:HGNC                                       |                  |             |             |
| Symbol;Acc:HGNC:23049] | -                                                       | 1165                                               | 1370             | 1419        | 1028        |
|                        | 1007                                                    | 16.38680863                                        | 15.53560852      | 16.90669021 | 1333        |

|                                                           |                                                   |             |                |             |             |             |
|-----------------------------------------------------------|---------------------------------------------------|-------------|----------------|-------------|-------------|-------------|
| 12.78403865                                               | 14.94040915                                       | 12.09063888 |                |             |             |             |
| ENSG00000166164                                           | 1574.624841                                       | 1518.345969 | 1585.989031    |             |             |             |
| 1403.395776                                               | 1279.403828                                       | 1139.191218 | 1559.65328     |             |             |             |
| 1273.996941                                               | 0.291852812                                       | 0.047967694 | 0.181955867    | BRD7        |             |             |
| 16                                                        | 50313487                                          | 50368934    | - 8492         |             |             |             |
| protein_coding                                            | bromodomain containing 7 [Source:HGNC             |             |                |             |             |             |
| Symbol;Acc:HGNC:14310]                                    | -                                                 | 1361        | 1638           | 1622        | 1397        | 1400        |
| 1161                                                      | 8.76481699                                        | 8.50428625  | 8.847963455    |             |             |             |
| 7.954037554                                               | 7.184170784                                       | 6.382168558 |                |             |             |             |
| ENSG00000143434                                           | 121.480976                                        | 241.9342478 | 224.8936357    |             |             |             |
| 258.1766031                                               | 310.7123583                                       | 315.9513973 | 196.1029531    |             |             |             |
| 294.9467862                                               | -0.585982367                                      | 0.048005617 | 0.182054543    | SEMA6C      |             |             |
| 1                                                         | 151131685                                         | 151146664   | - 5809         |             |             |             |
| protein_coding                                            | semaphorin 6C [Source:HGNC Symbol;Acc:HGNC:10740] |             |                |             |             |             |
| -                                                         | 105                                               | 261         | 230            | 257         | 340         | 322         |
| 0.98851357                                                | 1.980948061                                       | 1.834124936 | 2.139109238    |             |             |             |
| 2.550563488                                               | 2.58762019                                        |             |                |             |             |             |
| ENSG00000259899                                           | 0                                                 | 0           | 0.977798416    | 19.08698622 | 0           |             |
| 5.887293117                                               | 0.325932805                                       | 8.324759778 | -4.513433136   |             |             |             |
| 0.048050347                                               | 1                                                 | AC010333.2  | 16             | 12560756    |             |             |
| 12611044                                                  | -                                                 | 698         | antisense      | "novel      |             |             |
| transcript, antisense to a novel protein"                 |                                                   |             | -              | 0           | 0           |             |
| 1                                                         | 19                                                | 0           | 6              | 0           | 0           | 0.066366212 |
| 1.316131837                                               | 0                                                 | 0.401274778 |                |             |             |             |
| ENSG00000156239                                           | 315.8505375                                       | 406.0045997 | 438.0536904    |             |             |             |
| 623.8430759                                               | 494.3981937                                       | 454.3027855 | 386.6362759    |             |             |             |
| 524.1813517                                               | -0.437649599                                      | 0.048052628 | 0.182187631    | N6AMT1      |             |             |
| 21                                                        | 28872191                                          | 28885371    | - 4865         |             |             |             |
| protein_coding                                            | N-6 adenine-specific DNA methyltransferase 1      |             |                |             |             |             |
| [Source:HGNC Symbol;Acc:HGNC:16021]                       | -                                                 | 273         | 438            | 448         |             |             |
| 621                                                       | 541                                               | 463         | 3.0688419      | 3.969403277 |             |             |
| 4.265771862                                               | 6.171773396                                       | 4.845884049 | 4.4426713      |             |             |             |
| ENSG00000100557                                           | 5.784808379                                       | 8.342560268 | 17.60037149    | 0           |             |             |
| 0                                                         | 2.943646558                                       | 10.57591338 | 0.981215519    |             |             |             |
| 3.440429553                                               | 0.04807583                                        | 1           | CCDC198        | 14          | 57469301    |             |
| 57493867                                                  | -                                                 | 4107        | protein_coding | coiled-coil |             |             |
| domain containing 198 [Source:HGNC Symbol;Acc:HGNC:20189] |                                                   |             |                |             | -           |             |
| 5                                                         | 9                                                 | 18          | 0              | 0           | 3           | 0.066579421 |
| 0.096616603                                               | 0.203025345                                       | 0           | 0              | 0           | 0.034099074 |             |
| ENSG00000164574                                           | 1595.450151                                       | 1302.366353 | 2162.890097    |             |             |             |
| 1633.444189                                               | 965.9498904                                       | 1159.796744 | 1686.9022      |             |             |             |
| 1253.063608                                               | 0.429154119                                       | 0.048128728 | 0.182406597    |             |             |             |
| GALNT10                                                   | 5                                                 | 154190730   | 154420984      | +           | 10496       |             |
| protein_coding                                            | polypeptide N-acetylgalactosaminyltransferase 10  |             |                |             |             |             |
| [Source:HGNC Symbol;Acc:HGNC:19873]                       | -                                                 | 1379        | 1405           | 2212        |             |             |
| 1626                                                      | 1057                                              | 1182        | 7.185138714    | 5.9018268   |             |             |
| 9.762560907                                               | 7.490277982                                       | 4.388435939 | 5.257020739    |             |             |             |
| ENSG00000170855                                           | 499.8074439                                       | 538.5586128 | 508.4551764    |             |             |             |
| 285.3002151                                               | 476.1209961                                       | 370.8994664 | 515.6070777    |             |             |             |
| 377.4402258                                               | 0.449427889                                       | 0.048134246 | 0.182406597    | TRIAP1      |             |             |

|                                                         |                                                        |             |                |             |  |
|---------------------------------------------------------|--------------------------------------------------------|-------------|----------------|-------------|--|
| 12                                                      | 120443961                                              | 120446412   | -              | 1442        |  |
| protein_coding                                          | TP53 regulated inhibitor of apoptosis 1 [Source:HGNC   |             |                |             |  |
| Symbol;Acc:HGNC:26937]                                  | -                                                      | 432 581     | 520 284        | 521         |  |
| 378                                                     | 16.38374573                                            | 17.76416629 | 16.70477149    |             |  |
| 9.522572682                                             | 15.7445793                                             | 12.23693281 |                |             |  |
| ENSG00000172336                                         | 462.7846703                                            | 629.3998246 | 573.9676703    |             |  |
| 777.5435438                                             | 657.9791117                                            | 729.043131  | 555.3840551    |             |  |
| 721.5219289                                             | -0.37615989                                            | 0.048149535 | 0.182419315    | POP7        |  |
| 7                                                       | 100706053                                              | 100707495   | +              | 988         |  |
| protein_coding                                          | "POP7 homolog, ribonuclease P/MRP subunit [Source:HGNC |             |                |             |  |
| Symbol;Acc:HGNC:19949]"                                 | -                                                      | 400 679     | 587 774        | 720         |  |
| 743                                                     | 22.1410269                                             | 30.30029018 | 27.52222953    |             |  |
| 37.87784239                                             | 31.75661103                                            | 35.10572165 |                |             |  |
| ENSG00000185201                                         | 1029.695891                                            | 1491.464386 | 1568.38866     |             |  |
| 944.3035287                                             | 1075.613076                                            | 1152.928235 | 1363.182979    |             |  |
| 1057.614947                                             | 0.366788916                                            | 0.048179355 | 0.182487068    | IFITM2      |  |
| 11                                                      | 307631 315272                                          | + 1543      | protein_coding |             |  |
| interferon induced transmembrane protein 2 [Source:HGNC |                                                        |             |                |             |  |
| Symbol;Acc:HGNC:5413]                                   | -                                                      | 890 1609    | 1604 940       | 1177        |  |
| 1175                                                    | 31.54414739                                            | 45.97524751 | 48.15494528    |             |  |
| 29.45527922                                             | 33.24062145                                            | 35.54822959 |                |             |  |
| ENSG00000153187                                         | 17828.77942                                            | 19424.26116 | 21483.209      |             |  |
| 17149.15483                                             | 14619.01646                                            | 17507.82851 | 19578.74986    |             |  |
| 16425.33327                                             | 0.253419011                                            | 0.048270562 | 0.18278724     | HNRNPU      |  |
| 1                                                       | 244840638                                              | 244864560   | -              | 22512       |  |
| protein_coding                                          | heterogeneous nuclear ribonucleoprotein U [Source:HGNC |             |                |             |  |
| Symbol;Acc:HGNC:5048]                                   | -                                                      | 15410 20955 | 21971 17071    | 15997       |  |
| 17843                                                   | 37.43546839                                            | 41.04001804 | 45.21038442    |             |  |
| 36.66452802                                             | 30.96585405                                            | 36.99983874 |                |             |  |
| ENSG00000207110                                         | 1.156961676                                            | 2.780853423 | 1.955596832    | 0           |  |
| 26.50193645                                             | 19.62431039                                            | 1.964470644 | 15.37541561    |             |  |
| -2.957740409                                            | 0.048291287                                            | 1           | RNU1-106P      | 8           |  |
| 127999131                                               | 127999294                                              | +           | 164 snRNA      | "RNA,       |  |
| U1 small nuclear 106, pseudogene [Source:HGNC           |                                                        |             |                |             |  |
| Symbol;Acc:HGNC:48448]"                                 |                                                        |             |                |             |  |
| -                                                       | 1 3                                                    | 2 0         | 29 20          |             |  |
| 0.333465466                                             | 0.806512986                                            | 0.56492215  | 0              | 7.705711544 |  |
| 5.692882019                                             |                                                        |             |                |             |  |
| ENSG00000232434                                         | 55.53416043                                            | 133.4809643 | 227.827031     |             |  |
| 162.741672                                              | 285.1242818                                            | 290.4397938 | 138.9473852    |             |  |
| 246.1019158                                             | -0.822152263                                           | 0.048311515 | 0.18289701     | AJM1        |  |
| 9                                                       | 136844415                                              | 136848801   | +              | 4387        |  |
| protein_coding                                          | apical junction component 1 homolog [Source:HGNC       |             |                |             |  |
| Symbol;Acc:HGNC:37284]                                  | -                                                      | 48 144      | 233 162        | 312         |  |
| 296                                                     | 0.598367939                                            | 1.447200872 | 2.460315159    |             |  |
| 1.785453716                                             | 3.099171127                                            | 3.149706687 |                |             |  |
| ENSG00000149476                                         | 610.8757648                                            | 712.8254273 | 700.103666     |             |  |
| 683.113191                                              | 864.511444                                             | 1131.341494 | 674.6016194    |             |  |
| 892.9887097                                             | -0.404203794                                           | 0.048401755 | 0.183193272    | TKFC        |  |
| 11                                                      | 61333210                                               | 61353295    | +              | 8136        |  |
| protein_coding                                          | triokinase and FMN cyclase [Source:HGNC                |             |                |             |  |

|                                                          |              |                                                 |             |             |             |             |
|----------------------------------------------------------|--------------|-------------------------------------------------|-------------|-------------|-------------|-------------|
| Symbol;Acc:HGNC:24552]                                   | -            | 528                                             | 769         | 716         | 680         | 946         |
| 1153                                                     | 3.54909558   | 4.167248106                                     | 4.076660433 |             |             |             |
| 4.041096201                                              | 5.066858711  | 6.615526344                                     |             |             |             |             |
| ENSG00000225137                                          | 144.6202095  | 136.2618177                                     | 122.224802  |             |             |             |
| 96.43950931                                              | 85.90282848  | 66.72265532                                     | 134.3689431 |             |             |             |
| 83.02166437                                              | 0.694200992  | 0.048425611                                     | 0.183238197 |             |             |             |
| DYNC1I2P1                                                | 10           | 50264978                                        | 50266815    | +           |             | 1838        |
| processed_pseudogene                                     |              | dynein cytoplasmic 1 intermediate               |             |             |             |             |
| chain 2 pseudogene 1 [Source:HGNC Symbol;Acc:HGNC:45012] |              |                                                 |             |             |             | -           |
| 125                                                      | 147          | 125                                             | 96          | 94          | 68          | 3.719282946 |
| 3.526190619                                              | 3.150409162  | 2.525381197                                     | 2.228645251 |             |             |             |
| 1.727068016                                              |              |                                                 |             |             |             |             |
| ENSG00000102904                                          | 85.615164    | 29.66243651                                     | 37.15633981 |             |             |             |
| 80.36625776                                              | 106.0077458  | 108.9149227                                     | 50.81131344 |             |             |             |
| 98.42964207                                              | -0.961947371 | 0.048493691                                     | 0.183419051 |             |             |             |
| TSNAXIP1                                                 | 16           | 67806765                                        | 67832148    | +           |             | 3852        |
| protein_coding                                           |              | translin associated factor X interacting        |             |             |             |             |
| protein 1 [Source:HGNC Symbol;Acc:HGNC:18586]            |              |                                                 |             |             |             | -           |
| 38                                                       | 80           | 116                                             | 111         | 1.050606671 | 0.366266887 |             |
| 0.456982715                                              | 1.004164642  | 1.312291478                                     | 1.345187231 |             |             |             |
| ENSG00000272391                                          | 2381.027129  | 2654.788067                                     | 3186.645038 |             |             |             |
| 3626.527382                                              | 2974.613901  | 3514.713991                                     | 2740.820078 |             |             |             |
| 3371.951758                                              | -0.298660661 | 0.048497403                                     | 0.183419051 |             |             |             |
| POM121C 7                                                | 75416787     | 75486271                                        | -           |             | 8767        |             |
| protein_coding                                           |              | POM121 transmembrane nucleoporin C [Source:HGNC |             |             |             |             |
| Symbol;Acc:HGNC:34005]                                   |              |                                                 |             |             |             | -           |
| 3582                                                     | 12.83775481  | 14.40309964                                     | 17.22010557 | 3259        | 3610        | 3255        |
| 19.90936515                                              | 16.17925739  | 19.07307036                                     |             |             |             |             |
| ENSG00000145337                                          | 1330.505927  | 1482.194874                                     | 1498.964972 |             |             |             |
| 1199.466397                                              | 1089.320974  | 1237.31277                                      | 1437.221924 |             |             |             |
| 1175.366714                                              | 0.290631657  | 0.04853593                                      | 0.183519356 |             |             | PYURF       |
| 4                                                        | 88520985     | 88523813                                        | -           |             | 1361        |             |
| protein_coding                                           |              | PIGY upstream reading frame [Source:HGNC        |             |             |             |             |
| Symbol;Acc:HGNC:44317]                                   |              |                                                 |             |             |             | -           |
| 1261                                                     | 46.20983607  | 51.79934838                                     | 52.17788671 | 1533        | 1194        | 1192        |
| 42.41772948                                              | 38.1660072   | 43.2516816                                      |             |             |             |             |
| ENSG00000198612                                          | 2442.346097  | 2063.39324                                      | 1796.21569  |             |             |             |
| 1475.725408                                              | 1888.948367  | 1676.897323                                     | 2100.651676 |             |             |             |
| 1680.523699                                              | 0.321399079  | 0.048552144                                     | 0.183530328 |             |             | COPS8       |
| 2                                                        | 237085312    | 237100466                                       | +           |             | 4743        |             |
| protein_coding                                           |              | COP9 signalosome subunit 8 [Source:HGNC         |             |             |             |             |
| Symbol;Acc:HGNC:24335]                                   |              |                                                 |             |             |             | -           |
| 1709                                                     | 24.34051828  | 20.69216788                                     | 17.94148918 | 1837        | 1469        | 2067        |
| 14.97510539                                              | 18.99091761  | 16.82034789                                     |             |             |             |             |
| ENSG00000129696                                          | 518.3188307  | 491.2841046                                     | 468.3654413 |             |             |             |
| 715.2596941                                              | 630.5633154  | 563.2177082                                     | 492.6561256 |             |             |             |
| 636.3469059                                              | -0.369486106 | 0.048562843                                     | 0.183530328 |             |             | TTI2        |
| 8                                                        | 33473386     | 33513601                                        | -           |             | 4222        |             |
| protein_coding                                           |              | TEL02 interacting protein 2 [Source:HGNC        |             |             |             |             |
| Symbol;Acc:HGNC:26262]                                   |              |                                                 |             |             |             | -           |
|                                                          |              | 448                                             | 530         | 479         | 712         | 690         |

|                                     |                                                                    |                |                      |                    |             |      |
|-------------------------------------|--------------------------------------------------------------------|----------------|----------------------|--------------------|-------------|------|
|                                     | 574                                                                | 5.803025751    | 5.534668306          | 5.255568975        |             |      |
| 8.153854944                         |                                                                    | 7.121794854    | 6.34657913           |                    |             |      |
| ENSG00000252777                     | 2.313923351                                                        | 0              | 0                    | 28.12819022        | 0           |      |
|                                     | 6.868508636                                                        | 0.771307784    | 11.66556628          | -3.991504468       |             |      |
|                                     | 0.0486159                                                          | 1              | RF00422 1            | 28689665           |             |      |
| 28689794                            | +                                                                  | 130            | scaRNA               | -                  | 2           | 0    |
|                                     | 0                                                                  | 28             | 7                    | 0.841359022        | 0           | 0    |
|                                     | 10.41395977                                                        | 0              | 2.513626368          |                    |             |      |
| ENSG00000226469                     | 9.255693406                                                        | 10.19646255    | 26.40055724          | 0                  |             |      |
|                                     | 3.65543951                                                         | 3.924862078    | 15.28423773          | 2.526767196        |             |      |
|                                     | 2.591008989                                                        | 0.048662954    | 1                    | ADAM1B 12          |             |      |
| 111927018                           | 111929017                                                          | +              | 2000                 | unitary_pseudogene |             |      |
|                                     | ADAM metalloproteinase domain 1B (pseudogene) [Source:HGNC         |                |                      |                    |             |      |
| Symbol;Acc:HGNC:44366]              | -                                                                  | 8              | 11                   | 27                 | 0           | 4    |
|                                     | 4                                                                  | 0.218753346    | 0.242491571          | 0.62536882         | 0           |      |
|                                     | 0.087154255                                                        | 0.093363265    |                      |                    |             |      |
| ENSG00000251669                     | 86.77212568                                                        | 184.463277     | 86.04626062          |                    |             |      |
| 187.8561275                         | 229.3788292                                                        | 170.7315004    | 119.0938878          |                    |             |      |
| 195.988819                          | -0.715821739                                                       | 0.048671021    | 0.183893697          |                    |             |      |
| FAM86EP 4                           | 3941760                                                            | 3955419        | -                    | 3476               |             |      |
|                                     | transcribed_unprocessed_pseudogene "family with sequence           |                |                      |                    |             |      |
|                                     | similarity 86 member E, pseudogene [Source:HGNC                    |                |                      |                    |             |      |
| Symbol;Acc:HGNC:28017]"             | -                                                                  | 75             | 199                  | 88                 | 187         | 251  |
|                                     | 174                                                                | 1.179984244    | 2.524104125          | 1.17274978         |             |      |
| 2.601135973                         | 3.146679795                                                        | 2.336767567    |                      |                    |             |      |
| ENSG00000117448                     | 1402.237551                                                        | 1204.109532    | 1338.606032          |                    |             |      |
| 1660.567801                         | 1410.085791                                                        | 1808.380202    | 1314.984372          |                    |             |      |
| 1626.344598                         | -0.306763114                                                       | 0.048709392    | 0.183974144          | AKR1A1             |             |      |
|                                     | 1                                                                  | 45550543       | 45570049             | +                  | 3121        |      |
|                                     | protein_coding aldo-keto reductase family 1 member A1 [Source:HGNC |                |                      |                    |             |      |
| Symbol;Acc:HGNC:380]                | -                                                                  | 1212           | 1299                 | 1369               | 1653        | 1543 |
|                                     | 1843                                                               | 21.23750841    | 18.35056077          | 20.31945874        |             |      |
| 25.60827361                         | 21.544219                                                          | 27.56624441    |                      |                    |             |      |
| ENSG00000113391                     | 1303.895809                                                        | 978.8604047    | 907.3969302          |                    |             |      |
| 697.1772861                         | 909.290578                                                         | 850.7138554    | 1063.384381          |                    |             |      |
| 819.0605732                         | 0.375605575                                                        | 0.048716382    | 0.183974144          |                    |             |      |
| FAM172A 5                           | 93618069                                                           | 94111699       | -                    | 5071               |             |      |
|                                     | protein_coding family with sequence similarity 172 member A        |                |                      |                    |             |      |
| [Source:HGNC Symbol;Acc:HGNC:25365] | -                                                                  |                | 1127                 | 1056               | 928         |      |
|                                     | 694                                                                | 995            | 867                  | 12.15416193        | 9.181301847 |      |
| 8.47728573                          | 6.61709053                                                         | 8.550432206    | 7.981261176          |                    |             |      |
| ENSG00000188770                     | 0                                                                  | 0              | 0                    | 13.05951689        | 6.397019142 |      |
|                                     | 0                                                                  | 0              | 6.485512009          | -5.116569584       | 0.048727534 |      |
|                                     | 1                                                                  | OPTC 1         | 203494143            | 203508864          | +           |      |
|                                     | 1359                                                               | protein_coding | opticin [Source:HGNC |                    |             |      |
| Symbol;Acc:HGNC:8158]               | -                                                                  | 0              | 0                    | 0                  | 13          | 7    |
|                                     | 0                                                                  | 0              | 0                    | 0.462514244        | 0.224459081 |      |
|                                     | 0                                                                  |                |                      |                    |             |      |
| ENSG00000176986                     | 1507.521063                                                        | 1828.874601    | 1801.104683          |                    |             |      |
| 2476.285317                         | 1881.637488                                                        | 2017.379108    | 1712.500116          |                    |             |      |

|                                                           |                                                      |                                      |              |                |
|-----------------------------------------------------------|------------------------------------------------------|--------------------------------------|--------------|----------------|
| 2125.100638                                               | -0.310892992                                         | 0.048732551                          | 0.183989753  | SEC24C         |
| 10                                                        | 73744384                                             | 73772161                             | + 5341       |                |
| protein_coding                                            | "SEC24 homolog C, COPII coat complex component       |                                      |              |                |
| [Source:HGNC Symbol;Acc:HGNC:10705]"                      | -                                                    | 1303                                 | 1973         | 1842           |
| 2465                                                      | 2059                                                 | 2056                                 | 13.34186526  | 16.28690133    |
| 15.97605341                                               | 22.31493171                                          | 16.79934567                          | 17.96993756  |                |
| ENSG00000279345                                           | 13.88354011                                          | 23.17377852                          | 11.73358099  | 0              |
| 0                                                         | 6.868508636                                          | 16.26363321                          | 2.289502879  |                |
| 2.835295801                                               | 0.048746491                                          | 1                                    | Z98885.3     | 22             |
| 49805452                                                  | 49807208                                             | +                                    | 1757         | antisense      |
| transcript, antisense to BRD1"                            | -                                                    | 12                                   | 25           | 12             |
| 0                                                         | 7                                                    | 0.373511689                          | 0.627338881  | 0.316382126    |
| 0                                                         | 0                                                    | 0.1859826                            |              |                |
| ENSG00000130684                                           | 42.807582                                            | 90.8412118                           | 63.55689705  |                |
| 104.4761351                                               | 118.8017841                                          | 122.6519399                          | 65.73523029  |                |
| 115.309953                                                | -0.80615061                                          | 0.048788116                          | 0.184154058  | ZNF337         |
| 20                                                        | 25674215                                             | 25696841                             | -            | 3823           |
| protein_coding                                            | zinc finger protein 337 [Source:HGNC                 |                                      |              |                |
| Symbol;Acc:HGNC:15809]                                    | zf-C2H2                                              | 37                                   | 98           | 65             |
| 125                                                       | 0.529288111                                          | 1.130201126                          | 0.787610531  | 130            |
| 1.315316469                                               | 1.481827506                                          | 1.526341635                          |              |                |
| ENSG00000184349                                           | 569.2251445                                          | 401.369844                           | 459.5652556  |                |
| 291.3276844                                               | 380.165709                                           | 377.767975                           | 476.7200813  |                |
| 349.7537895                                               | 0.445260035                                          | 0.048812309                          | 0.184184251  | EFNA5          |
| 5                                                         | 107376889                                            | 107670895                            | -            | 5703           |
| protein_coding                                            | ephrin A5 [Source:HGNC Symbol;Acc:HGNC:3225]         |                                      |              | -              |
| 492                                                       | 433                                                  | 470                                  | 290          | 416            |
| 3.347483791                                               | 3.817657315                                          | 2.458645094                          | 3.17869279   |                |
| 3.151399006                                               |                                                      |                                      |              |                |
| ENSG00000139613                                           | 1244.890763                                          | 1746.375949                          | 1742.436778  |                |
| 1214.53507                                                | 1209.950478                                          | 1334.453106                          | 1577.901163  |                |
| 1252.979552                                               | 0.333312635                                          | 0.048820212                          | 0.184184251  |                |
| SMARCC2                                                   | 12                                                   | 56162983                             | 56189567     | -              |
| protein_coding                                            | "SWI/SNF related, matrix associated, actin dependent |                                      |              |                |
| regulator of chromatin subfamily c member 2 [Source:HGNC  |                                                      |                                      |              |                |
| Symbol;Acc:HGNC:11105]"                                   | MYB                                                  | 1076                                 | 1884         | 1782           |
| 1360                                                      | 6.878392753                                          | 9.70945476                           | 9.649174082  | 1209           |
| 6.832938368                                               | 6.744139873                                          | 7.421042697                          |              | 1324           |
| ENSG00000177105                                           | 961.4351525                                          | 1051.162594                          | 1135.223961  |                |
| 1342.116505                                               | 1128.616949                                          | 1464.954771                          | 1049.273902  |                |
| 1311.896075                                               | -0.321715169                                         | 0.048839184                          | 0.184210364  | RHOG           |
| 11                                                        | 3826978                                              | 3840983                              | -            | 1782           |
| homolog family member G [Source:HGNC Symbol;Acc:HGNC:672] |                                                      |                                      |              | protein_coding |
| 831                                                       | 1134                                                 | 1161                                 | 1336         | 1235           |
| 28.056876                                                 | 30.1805379                                           | 36.24932925                          | 30.20075886  | 25.50281009    |
| 39.11093008                                               |                                                      |                                      |              |                |
| ENSG00000177465                                           | 0                                                    | 0                                    | 0            | 16.07325155    |
| 0                                                         | 0                                                    | 6.576230354                          | -5.135900328 | 3.65543951     |
| 1                                                         | ACOT4                                                | 14                                   | 73591706     | 73596496       |
| 2362                                                      | protein_coding                                       | acyl-CoA thioesterase 4 [Source:HGNC |              |                |



|                                     |                                         |                |                       |             |                |                                     |
|-------------------------------------|-----------------------------------------|----------------|-----------------------|-------------|----------------|-------------------------------------|
| Symbol;Acc:HGNC:19748]              | -                                       | 0              | 0                     | 0           | 16             | 4                                   |
| 0                                   | 0                                       | 0              | 0                     | 0.327522625 | 0.073796998    |                                     |
| 0                                   |                                         |                |                       |             |                |                                     |
| ENSG00000152942                     | 894.3313753                             | 738.7800593    | 718.6818359           |             |                |                                     |
| 597.7240421                         | 625.994016                              | 626.0155014    | 783.9310902           |             |                |                                     |
| 616.5778532                         | 0.345602347                             | 0.04892374     | 0.184483773           |             |                | RAD17                               |
| 5                                   | 69369293                                | 69414801       | +                     | 4159        |                |                                     |
| protein_coding                      | RAD17 checkpoint clamp loader component |                |                       |             |                | [Source:HGNC                        |
| Symbol;Acc:HGNC:9807]               | -                                       | 773            | 797                   | 735         | 595            | 685                                 |
| 638                                 | 10.16448282                             | 8.448962042    | 8.186549168           |             |                |                                     |
| 6.917182943                         | 7.177285943                             | 7.161067942    |                       |             |                |                                     |
| ENSG00000121101                     | 3.470885027                             | 5.561706845    | 6.844588913           |             |                | 0                                   |
| 0                                   | 0                                       | 5.292393595    | 0                     | 4.898451791 |                |                                     |
| 0.048926738                         | 1                                       | TEX14          | 17                    | 58556678    | 58692055       |                                     |
| -                                   | 5325                                    | protein_coding | "testis expressed 14, |             |                |                                     |
| intercellular bridge forming factor |                                         |                |                       |             |                | [Source:HGNC                        |
| Symbol;Acc:HGNC:11737]"             | -                                       | 3              | 6                     | 7           | 0              | 0                                   |
| 0                                   | 0.03081033                              | 0.049678171    | 0.060894895           |             |                | 0                                   |
| 0                                   | 0                                       |                |                       |             |                |                                     |
| ENSG00000155275                     | 137.6784394                             | 226.1760784    | 214.1378531           |             |                |                                     |
| 221.0072088                         | 398.4429066                             | 260.0221127    | 192.6641236           |             |                |                                     |
| 293.1574094                         | -0.60416273                             | 0.048937447    | 0.184489952           |             |                | TRMT44                              |
| 4                                   | 8436140                                 | 8493531        | +                     | 7724        | protein_coding | tRNA                                |
| methyltransferase 44 homolog        |                                         |                |                       |             |                | [Source:HGNC Symbol;Acc:HGNC:26653] |
| -                                   | 119                                     | 244            | 219                   | 220         | 436            | 265                                 |
| 0.842557229                         | 1.392776785                             | 1.313422058    | 1.377151223           |             |                |                                     |
| 2.459817132                         | 1.601583717                             |                |                       |             |                |                                     |
| ENSG00000197479                     | 3.470885027                             | 12.97731597    | 6.844588913           |             |                |                                     |
| 40.18312888                         | 16.44947779                             | 23.54917247    | 7.764263304           |             |                |                                     |
| 26.72725971                         | -1.769273856                            | 0.049003549    | 0.184693603           |             |                |                                     |
| PCDHB11                             | 5                                       | 141199582      | 141203779             | +           | 4198           |                                     |
| protein_coding                      | protocadherin beta 11                   |                |                       |             |                | [Source:HGNC                        |
| Symbol;Acc:HGNC:8682]               | -                                       | 3              | 14                    | 7           | 40             | 18                                  |
| 24                                  | 0.039081708                             | 0.147034605    | 0.077242809           |             |                |                                     |
| 0.460700595                         | 0.186848093                             | 0.266879271    |                       |             |                |                                     |
| ENSG00000175048                     | 153.8759029                             | 194.6597396    | 165.2479323           |             |                |                                     |
| 273.2452764                         | 195.5660138                             | 283.5712851    | 171.2611916           |             |                |                                     |
| 250.7941918                         | -0.548481553                            | 0.04907267     | 0.184877018           |             |                |                                     |
| ZDHHC14                             | 6                                       | 157381133      | 157678146             | +           | 11121          |                                     |
| protein_coding                      | zinc finger DHHC-type containing 14     |                |                       |             |                | [Source:HGNC                        |
| Symbol;Acc:HGNC:20341]              | -                                       | 133            | 210                   | 169         | 272            | 214                                 |
| 289                                 | 0.654037294                             | 0.832548249    | 0.703955684           |             |                |                                     |
| 1.182568427                         | 0.838549164                             | 1.213109595    |                       |             |                |                                     |
| ENSG00000171791                     | 284.6125722                             | 263.254124     | 356.8964219           |             |                |                                     |
| 222.0117871                         | 203.7907527                             | 219.7922764    | 301.587706            |             |                |                                     |
| 215.198272                          | 0.48725397                              | 0.049076401    | 0.184877018           |             |                | BCL2                                |
| 18                                  | 63123346                                | 63320128       | -                     | 11765       |                |                                     |
| protein_coding                      | "BCL2, apoptosis regulator              |                |                       |             |                | [Source:HGNC                        |
| Symbol;Acc:HGNC:990]"               | -                                       | 246            | 284                   | 365         | 221            | 223                                 |
| 224                                 | 1.143504527                             | 1.064290943    | 1.437154267           |             |                |                                     |

|                        |                                                  |                |                            |              |            |             |
|------------------------|--------------------------------------------------|----------------|----------------------------|--------------|------------|-------------|
| 0.908241953            | 0.825983799                                      | 0.888796064    |                            |              |            |             |
| ENSG0000062582         | 55.53416043                                      | 87.13340724    | 74.31267963                |              |            |             |
| 90.41203998            | 106.0077458                                      | 185.4497332    | 72.3267491                 |              |            |             |
| 127.2898396            | -0.812654491                                     | 0.049112814    | 0.18496861                 | MRPS24       |            |             |
| 7                      | 43866558                                         | 43869893       | -                          | 2613         |            |             |
| protein_coding         | mitochondrial ribosomal protein S24 [Source:HGNC |                |                            |              |            |             |
| Symbol;Acc:HGNC:14510] | -                                                | 48             | 94                         | 76           | 90         | 116         |
| 189                    | 1.004607787                                      | 1.586070187    | 1.347338247                |              |            |             |
| 1.665345379            | 1.934537609                                      | 3.376513032    |                            |              |            |             |
| ENSG00000163071        | 0                                                | 0              | 0                          | 11.05036044  | 3.65543951 |             |
|                        | 1.962431039                                      | 0              | 5.556076997                | -4.892756617 |            |             |
| 0.049127838            | 1                                                | SPATA18 4      | 52051331                   | 52097292     |            |             |
| +                      | 4941                                             | protein_coding | spermatogenesis associated | 18           |            |             |
| [Source:HGNC           | Symbol;Acc:HGNC:29579]                           | -              | 0                          | 0            | 0          |             |
| 11                     | 4                                                | 2              | 0                          | 0            | 0          | 0.107641328 |
|                        | 0.035277982                                      | 0.018895621    |                            |              |            |             |
| ENSG00000102081        | 2415.735979                                      | 1939.181787    | 2033.820706                |              |            |             |
| 1847.41935             | 1810.356417                                      | 1542.470797    | 2129.57949                 |              |            |             |
| 1733.415521            | 0.296531156                                      | 0.049173988    | 0.185111849                | FMR1         |            |             |
| X                      | 147911951                                        | 147951125      | +                          | 8919         |            |             |
| protein_coding         | fragile X mental retardation 1 [Source:HGNC      |                |                            |              |            |             |
| Symbol;Acc:HGNC:3775]  | -                                                | 2088           | 2092                       | 2080         | 1839       | 1981        |
| 1572                   | 12.80292034                                      | 10.34140327    | 10.80313061                |              |            |             |
| 9.969348588            | 9.678920203                                      | 8.227775129    |                            |              |            |             |
| ENSG00000196943        | 779.7921694                                      | 889.8730952    | 828.1952585                |              |            |             |
| 1190.425193            | 965.9498904                                      | 978.2718729    | 832.6201744                |              |            |             |
| 1044.882319            | -0.326989238                                     | 0.049184981    | 0.185111849                | NOP9         |            |             |
| 14                     | 24299862                                         | 24309124       | +                          | 6033         |            |             |
| protein_coding         | NOP9 nucleolar protein [Source:HGNC              |                |                            |              |            |             |
| Symbol;Acc:HGNC:19826] | -                                                | 674            | 960                        | 847          | 1185       | 1057        |
| 997                    | 6.109719668                                      | 7.015713827    | 6.503580808                |              |            |             |
| 9.496995703            | 7.634845618                                      | 7.714501518    |                            |              |            |             |
| ENSG00000119537        | 3139.993988                                      | 2675.180992    | 2293.915084                |              |            |             |
| 3383.419452            | 3691.080045                                      | 2938.740481    | 2703.030022                |              |            |             |
| 3337.746659            | -0.304656158                                     | 0.049187174    | 0.185111849                | KDSR         |            |             |
| 18                     | 63327726                                         | 63367510       | -                          | 9313         |            |             |
| protein_coding         | 3-ketodihydrosphingosine reductase [Source:HGNC  |                |                            |              |            |             |
| Symbol;Acc:HGNC:4021]  | -                                                | 2714           | 2886                       | 2346         | 3368       | 4039        |
| 2995                   | 15.93730754                                      | 13.66283054    | 11.66919402                |              |            |             |
| 17.48572711            | 18.89917507                                      | 15.01250827    |                            |              |            |             |
| ENSG00000143702        | 4991.132669                                      | 4777.50618     | 3877.948518                |              |            |             |
| 5742.169117            | 6106.411701                                      | 4809.918476    | 4548.862456                |              |            |             |
| 5552.833098            | -0.287853008                                     | 0.049252547    | 0.185312255                | CEP170       |            |             |
| 1                      | 243124428                                        | 243255348      | -                          | 10939        |            |             |
| protein_coding         | centrosomal protein 170 [Source:HGNC             |                |                            |              |            |             |
| Symbol;Acc:HGNC:28920] | -                                                | 4314           | 5154                       | 3966         | 5716       | 6682        |
| 4902                   | 21.5673721                                       | 20.77307312    | 16.79490468                |              |            |             |
| 25.26479707            | 26.61873709                                      | 20.91903856    |                            |              |            |             |
| ENSG00000160993        | 208.2531016                                      | 268.8158308    | 302.1397106                |              |            |             |
| 334.5245479            | 381.9934288                                      | 362.0685267    | 259.7362144                |              |            |             |

|                                      |                                                        |             |                 |        |
|--------------------------------------|--------------------------------------------------------|-------------|-----------------|--------|
| 359.5288345                          | -0.467602783                                           | 0.04931636  | 0.185501942     | ALKBH4 |
| 7                                    | 102456238                                              | 102464876   | - 2312          |        |
| protein_coding                       | "alkB homolog 4, lysine demethylase [Source:HGNC       |             |                 |        |
| Symbol;Acc:HGNC:21900]"              | -                                                      | 180 290     | 309 333         | 418    |
| 369                                  | 4.257742456                                            | 5.530241872 | 6.191175364     |        |
| 6.963981685                          | 7.878563682                                            | 7.450485473 |                 |        |
| ENSG00000169621                      | 114.5392059                                            | 129.7731597 | 118.3136084     |        |
| 69.31589732                          | 89.55826799                                            | 59.85414669 | 120.8753247     |        |
| 72.90943733                          | 0.728802778                                            | 0.049327232 | 0.185501942     | APLF   |
| 2                                    | 68467561                                               | 68655862    | + 7135          |        |
| protein_coding                       | aprataxin and PNKP like factor [Source:HGNC            |             |                 |        |
| Symbol;Acc:HGNC:28724]"              | -                                                      | 99 140      | 121 69          | 98     |
| 61                                   | 0.758815039                                            | 0.865103395 | 0.785586205     |        |
| 0.467580434                          | 0.598536578                                            | 0.399100152 |                 |        |
| ENSG00000185504                      | 1298.111                                               | 1697.247539 | 1762.970544     |        |
| 1838.378146                          | 1983.989794                                            | 2081.158117 | 1586.109694     |        |
| 1967.842019                          | -0.310546589                                           | 0.049347677 | 0.185533187     |        |
| FAAP100 17                           | 81539885                                               | 81553961    | - 5354          |        |
| protein_coding                       | FA core complex associated protein 100 [Source:HGNC    |             |                 |        |
| Symbol;Acc:HGNC:26171]"              | -                                                      | 1122 1831   | 1803 1830       | 2171   |
| 2121                                 | 11.46064876                                            | 15.07800682 | 15.59982821     |        |
| 16.52623558                          | 17.6701426                                             | 18.49304121 |                 |        |
| ENSG00000128915                      | 1441.574248                                            | 1001.107232 | 991.487594      |        |
| 830.7861896                          | 996.1072664                                            | 822.2586053 | 1144.723025     |        |
| 883.0506871                          | 0.37336555                                             | 0.04936009  | 0.185534225     | ICE2   |
| 15                                   | 60419609                                               | 60479160    | - 16010         |        |
| protein_coding                       | interactor of little elongation complex ELL subunit 2  |             |                 |        |
| [Source:HGNC Symbol;Acc:HGNC:29885]" | -                                                      | 1246 1080   | 1014            |        |
| 827                                  | 1090 838                                               | 4.256194078 | 2.97417406      |        |
| 2.93392548                           | 2.497556917                                            | 2.966837528 | 2.443423365     |        |
| ENSG00000140682                      | 1119.938902                                            | 1050.235643 | 987.5764003     |        |
| 750.4199319                          | 869.9946033                                            | 910.5680021 | 1052.583648     |        |
| 843.6608457                          | 0.318780604                                            | 0.049385294 | 0.18558333      |        |
| TGFB1I1 16                           | 31471585                                               | 31477960    | + 5403          |        |
| protein_coding                       | transforming growth factor beta 1 induced transcript 1 |             |                 |        |
| [Source:HGNC Symbol;Acc:HGNC:11767]" | -                                                      | 968 1133    | 1010            |        |
| 747                                  | 952 928                                                | 9.797947375 | 9.245468011     |        |
| 8.65942115                           | 6.684775872                                            | 7.678220478 | 8.01787063      |        |
| ENSG00000041982                      | 7973.779869                                            | 5628.447327 | 7455.712923     |        |
| 9405.865893                          | 6540.495143                                            | 11128.94642 | 7019.313373     |        |
| 9025.102486                          | -0.362667212                                           | 0.049399944 | 0.18559276      | TNC    |
| 9                                    | 115019578                                              | 115118257   | - 9636          |        |
| protein_coding                       | tenascin C [Source:HGNC Symbol;Acc:HGNC:5318]"         |             |                 | -      |
| 6892                                 | 6072 7625                                              | 9363 7157   | 11342 39.114987 |        |
| 27.78234689                          | 36.65603719                                            | 46.98069623 | 32.36628274     |        |
| 54.94635496                          |                                                        |             |                 |        |
| ENSG00000105520                      | 931.354149                                             | 1346.860008 | 1234.9594       |        |
| 1609.334312                          | 1325.096822                                            | 1523.827702 | 1171.057852     |        |
| 1486.086279                          | -0.342746554                                           | 0.049554334 | 0.186127052     | PLPPR2 |
| 19                                   | 11355386                                               | 11365698    | + 3273          |        |

|                          |                                                        |             |      |                                   |                |             |
|--------------------------|--------------------------------------------------------|-------------|------|-----------------------------------|----------------|-------------|
| protein_coding           | phospholipid phosphatase related 2 [Source:HGNC        |             |      |                                   |                |             |
| Symbol;Acc:HGNC:29566]   | -                                                      | 805         | 1453 | 1263                              | 1602           | 1450        |
| 1553                     | 13.45069075                                            | 19.57282743 |      | 17.87556596                       |                |             |
| 23.66561107              | 19.30547958                                            | 22.14988554 |      |                                   |                |             |
| ENSG00000242791          | 2.313923351                                            | 0.926951141 |      | 5.866790497                       |                |             |
| 26.11903377              | 18.27719755                                            | 4.906077597 |      | 3.03588833                        |                |             |
| 16.43410297              | -2.435684652                                           | 0.049567365 |      | 1                                 | AC117395.1     |             |
| 3                        | 149976755                                              | 149979355   |      | +                                 | 721            |             |
| lincRNA novel transcript |                                                        | -           | 2    | 1                                 | 6              | 26          |
| 20                       | 5                                                      | 0.151701349 |      | 0.061150314                       |                | 0.385494727 |
| 1.743569646              |                                                        | 1.208796875 |      | 0.323728381                       |                |             |
| ENSG00000158292          | 119.1670526                                            | 217.8335181 |      | 220.9824421                       |                |             |
| 252.1491337              | 319.8509571                                            | 264.9281903 |      | 185.9943376                       |                |             |
| 278.9760937              | -0.582308428                                           | 0.049569236 |      | 0.186137291                       |                | GPR153      |
| 1                        | 6247346                                                | 6260975     | -    | 4082                              | protein_coding | G           |
| protein-coupled          | receptor 153 [Source:HGNC                              |             |      |                                   |                |             |
| Symbol;Acc:HGNC:23618]   | -                                                      | 103         | 235  | 226                               | 251            | 350         |
| 1.379935976              | 2.538217417                                            | 2.564707812 |      | 2.973048114                       |                |             |
| 3.736402394              | 3.087712099                                            |             |      |                                   |                |             |
| ENSG00000260966          | 219.8227184                                            | 153.8738894 |      | 123.2026004                       |                |             |
| 380.7351461              | 211.1016317                                            | 193.2994573 |      | 165.6330694                       |                |             |
| 261.7120784              | -0.661617035                                           | 0.049645195 |      | 0.186376742                       |                |             |
| AP001486.2               | 11                                                     | 103050687   |      | 103055799                         | -              | 5113        |
|                          | sense_overlapping                                      |             |      | "novel transcript, overlapping to |                |             |
| DCUN1D5"                 | -                                                      | 190         | 166  | 126                               | 379            | 231         |
| 2.032228422              |                                                        | 1.431417272 |      | 1.141555966                       |                | 197         |
| 1.968769102              |                                                        | 1.798607787 |      |                                   |                | 3.583972212 |
| ENSG00000110048          | 2244.505651                                            | 2195.020302 |      | 2138.445136                       |                |             |
| 2660.123132              | 2727.871734                                            | 2445.189075 |      | 2192.65703                        |                |             |
| 2611.061314              | -0.252072934                                           | 0.049684366 |      | 0.186478001                       |                | OSBP        |
| 11                       | 59574398                                               | 59616144    |      | -                                 | 5492           |             |
| protein_coding           | oxysterol binding protein [Source:HGNC                 |             |      |                                   |                |             |
| Symbol;Acc:HGNC:8503]    | -                                                      | 1940        | 2368 | 2187                              | 2648           | 2985        |
| 2492                     | 19.31816691                                            | 19.01013178 |      | 18.44678603                       |                |             |
| 23.31249031              | 23.68494631                                            | 21.18183327 |      |                                   |                |             |
| ENSG00000258458          | 0                                                      | 0           |      | 8.800185745                       |                | 19.08698622 |
| 15.53561792              | 21.58674143                                            | 2.933395248 |      |                                   |                |             |
| 18.73644852              | -2.661448844                                           | 0.049734626 |      | 1                                 | AL160314.2     |             |
| 14                       | 22701476                                               | 22766562    |      | -                                 | 2513           |             |
| processed_transcript     | "novel transcript, antisense to OXA1L"                 |             |      |                                   |                | -           |
| 0                        | 0                                                      | 9           | 19   | 17                                | 22             | 0           |
| 0.165902327              |                                                        | 0.365563081 |      | 0.29479155                        |                | 0.408673266 |
| ENSG00000204574          | 5377.557869                                            | 6272.67837  |      | 5869.723892                       |                |             |
| 7453.970407              | 6527.701104                                            | 6781.180455 |      | 5839.98671                        |                |             |
| 6920.950656              | -0.244838928                                           | 0.049773616 |      | 0.186767126                       |                | ABCF1       |
| 6                        | 30571376                                               | 30597179    |      | +                                 | 4523           |             |
| protein_coding           | ATP binding cassette subfamily F member 1 [Source:HGNC |             |      |                                   |                |             |
| Symbol;Acc:HGNC:70]      | -                                                      | 4648        | 6767 | 6003                              | 7420           | 7143        |
| 6911                     | 56.19973198                                            | 65.96347807 |      | 61.48146556                       |                |             |
| 79.31923811              | 68.81968178                                            | 71.32804833 |      |                                   |                |             |

|                 |                                                           |                                                        |             |                |              |
|-----------------|-----------------------------------------------------------|--------------------------------------------------------|-------------|----------------|--------------|
| ENSG00000260572 | 10.41265508                                               | 10.19646255                                            | 12.71137941 |                |              |
| 53.24264577     | 21.93263706                                               | 21.58674143                                            | 11.10683235 |                |              |
| 32.25400808     | -1.536081258                                              | 0.049821443                                            | 0.186900712 |                |              |
| AC069224.1      | 3                                                         | 160753428                                              | 160755142   | -              | 1715         |
|                 | antisense                                                 | "novel transcript, antisense to PPM1L"                 |             |                | -            |
|                 | 9                                                         | 11                                                     | 13          | 53             | 24           |
|                 | 0.282789004                                               | 0.351141115                                            | 1.494214552 | 0.286994185    | 0.609825689  |
|                 | 0.598831438                                               |                                                        |             |                |              |
| ENSG00000248713 | 3.470885027                                               | 13.90426711                                            | 19.55596832 | 0              |              |
|                 | 0                                                         | 3.924862078                                            | 12.31037349 | 1.308287359    |              |
| 3.244584241     | 0.049824219                                               | 1                                                      | C4orf54     | 4              | 99636529     |
|                 | 99654648                                                  | -                                                      | 10086       | protein_coding | chromosome 4 |
|                 | open reading frame 54 [Source:HGNC Symbol;Acc:HGNC:27741] |                                                        |             |                |              |
|                 | 3                                                         | 15                                                     | 20          | 0              | 0            |
|                 | 0.065570161                                               | 0.09185726                                             | 0           | 0              | 0.016266608  |
|                 |                                                           |                                                        |             |                | 0.018513437  |
| ENSG00000183648 | 201.3113316                                               | 164.9973031                                            | 263.0277739 |                |              |
| 62.28384977     | 158.0977588                                               | 156.9944831                                            | 209.7788029 |                |              |
| 125.7920306     | 0.736665064                                               | 0.049884275                                            | 0.187090507 |                | NDUFB1       |
|                 | 14                                                        | 92116122                                               | 92121917    | -              | 2263         |
|                 | protein_coding                                            | NADH:ubiquinone oxidoreductase subunit B1 [Source:HGNC |             |                |              |
|                 | Symbol;Acc:HGNC:7695]                                     | -                                                      | 174         | 178            | 269          |
|                 | 160                                                       | 4.204936164                                            | 3.467922683 | 5.50643075     | 62           |
|                 | 1.324671986                                               | 3.331349108                                            | 3.300513128 |                | 173          |
| ENSG00000076356 | 517.161869                                                | 571.9288539                                            | 706.9482549 |                |              |
| 580.6462123     | 328.075696                                                | 385.6176992                                            | 598.6796593 |                |              |
| 431.4465358     | 0.473663602                                               | 0.049916008                                            | 0.187159551 |                | PLXNA2       |
|                 | 1                                                         | 208022242                                              | 208244320   | -              | 13781        |
|                 | protein_coding                                            | plexin A2 [Source:HGNC Symbol;Acc:HGNC:9100]           |             |                | -            |
|                 | 447                                                       | 617                                                    | 723         | 578            | 359          |
|                 | 1.973960188                                               | 2.430300747                                            | 2.027908344 | 393            | 1.773868833  |
|                 | 1.331244583                                               |                                                        |             |                | 1.13519982   |
| ENSG00000182963 | 2389.12586                                                | 2135.695429                                            | 3107.443367 |                |              |
| 1977.009941     | 2010.49173                                                | 2150.824419                                            | 2544.088218 |                |              |
| 2046.108697     | 0.314298306                                               | 0.04992717                                             | 0.187159551 |                | GJC1         |
|                 | 17                                                        | 44798448                                               | 44830816    | -              | 8660         |
|                 | protein_coding                                            | gap junction protein gamma 1 [Source:HGNC              |             |                |              |
|                 | Symbol;Acc:HGNC:4280]                                     | -                                                      | 2065        | 2304           | 3178         |
|                 | 2192                                                      | 13.04057907                                            | 11.73001428 | 16.99959037    | 1968         |
|                 | 10.98774112                                               | 11.07040187                                            | 11.81595133 |                | 2200         |
| ENSG00000233589 | 12.72657843                                               | 9.269511408                                            | 8.800185745 | 0              |              |
|                 | 0                                                         | 2.943646558                                            | 10.2654252  | 0.981215519    |              |
| 3.394390195     | 0.049960652                                               | 1                                                      | AL138789.1  | 1              |              |
| 68479129        | 68483539                                                  | +                                                      | 960         | antisense      | novel        |
|                 | transcript                                                | -                                                      | 11          | 10             | 9            |
|                 | 0.626637188                                               | 0.459264339                                            | 0.434283903 | 0              | 0            |
|                 | 0.145880102                                               |                                                        |             |                | 3            |
| ENSG00000108349 | 3216.353458                                               | 3792.157117                                            | 3887.726503 |                |              |
| 4756.677881     | 4156.234722                                               | 4171.147173                                            | 3632.079026 |                |              |
| 4361.353259     | -0.263705579                                              | 0.049972757                                            | 0.187284514 |                | CASC3        |
|                 | 17                                                        | 40140318                                               | 40172183    | +              | 6380         |

protein\_coding "CASC3, exon junction complex subunit [Source:HGNC  
Symbol;Acc:HGNC:17040]" - 2780 4091 3976 4735 4548  
4251 23.82971399 28.27110338 28.86876151  
35.88397299 31.06407135 31.10401567
