# Supplementary material for: Multiomic screening of invasive GBM cells reveals targetable transsulfuration pathway alterations
Source: PubMed Central journal article supplement (PMC10849762; doi:10.1172/jci170397), 2024-02-01
Supplement: jci-134-170397-s077.pdf [file jci-134-170397-s077.pdf]

SUPPLEMENTAL TABLE 13. Results of bulk RNA-seq comparing GBM43 knockdown vs. GBM43 control cells in the core fractions after invading 3D hydrogels.

| gene_id                                                        | CTHKD_CORE1       | CTHKD_CORE2       | CTHKD_CORE3 | NT_CORE1    |                |
|----------------------------------------------------------------|-------------------|-------------------|-------------|-------------|----------------|
|                                                                | NT_CORE2          | NT_CORE3          | CTH_KD_Core | Wt_Core     |                |
| log2FoldChange                                                 | pvalue            | padj              | gene_name   | gene_chr    |                |
| gene_start                                                     | gene_end          | gene_strand       | gene_length |             |                |
| gene_biotype                                                   | gene_description  | tf_family         |             |             |                |
| CTHKD_CORE1_count                                              | CTHKD_CORE2_count | CTHKD_CORE3_count |             |             |                |
| NT_CORE1_count                                                 | NT_CORE2_count    | NT_CORE3_count    |             |             |                |
| CTHKD_CORE1_fpk                                                | CTHKD_CORE2_fpk   | CTHKD_CORE3_fpk   |             |             |                |
| NT_CORE1_fpk                                                   | NT_CORE2_fpk      | NT_CORE3_fpk      |             |             |                |
| ENSG00000251562                                                | 8418.163108       | 6151.503808       | 7290.64312  |             |                |
| 3726.095814                                                    | 3439.975321       | 3772.086973       | 7286.770012 |             |                |
| 3646.052703                                                    | 0.998740712       | 4.92E-14          | 9.03E-11    |             | MALAT1         |
| 11                                                             | 65497688          | 65506516          | +           | 8829        |                |
| lincRNA metastasis associated lung adenocarcinoma transcript 1 |                   |                   |             |             |                |
| [Source:HGNC Symbol;Acc:HGNC:29665]                            |                   |                   |             |             |                |
|                                                                | -                 | 8752              | 7070        |             | 7836           |
| 3381                                                           | 2838              | 4086              | 47.92885    | 34.89526451 |                |
| 41.43133681                                                    | 21.27872969       | 19.758239         | 21.51879081 |             |                |
| ENSG00000245532                                                | 17718.3481        | 12167.27429       | 21162.96177 |             |                |
| 6395.307309                                                    | 8206.001735       | 8008.530223       | 17016.19472 |             |                |
| 7536.613089                                                    | 1.174889579       | 2.42E-12          | 2.22E-09    |             | NEAT1          |
| 11                                                             | 65422774          | 65445540          | +           | 22767       |                |
| lincRNA nuclear paraspeckle assembly transcript 1 [Source:HGNC |                   |                   |             |             |                |
| Symbol;Acc:HGNC:30815]                                         |                   |                   |             |             |                |
|                                                                | -                 | 18421             | 13984       | 22746       | 5803           |
| 8675                                                           | 39.12087965       | 26.76604511       | 46.63857399 |             | 6770           |
| 14.16311582                                                    | 18.27806516       | 17.71718394       |             |             |                |
| ENSG00000248527                                                | 2322.882073       | 2289.194699       | 2012.463128 |             |                |
| 3827.486177                                                    | 3753.912463       | 3700.079439       | 2208.179967 |             |                |
| 3760.492693                                                    | -0.768019881      | 3.06E-10          | 1.87E-07    |             |                |
| MTATP6P1                                                       | 1                 | 633696            | 634376      | +           | 681            |
| unprocessed_pseudogene MT-ATP6 pseudogene 1 [Source:HGNC       |                   |                   |             |             |                |
| Symbol;Acc:HGNC:44575]                                         |                   |                   |             |             |                |
|                                                                | -                 | 2415              | 2631        | 2163        | 3473           |
| 4008                                                           | 171.4633244       | 168.357448        | 148.270736  |             | 3097           |
| 283.3803387                                                    | 279.5383862       | 273.6601868       |             |             |                |
| ENSG00000179813                                                | 448.2248638       | 405.4597984       | 330.2933011 |             |                |
| 109.1048464                                                    | 88.48421369       | 144.015068        | 394.6593211 |             |                |
| 113.8680427                                                    | 1.788974628       | 6.31E-09          | 1           |             | FAM216B 13     |
| 42781550                                                       | 42791549          | +                 | 3308        |             | protein_coding |
| family with sequence similarity 216 member B [Source:HGNC      |                   |                   |             |             |                |
| Symbol;Acc:HGNC:26883]                                         |                   |                   |             |             |                |
|                                                                | -                 | 466               | 466         | 355         | 99             |
| 156                                                            | 6.811168625       | 6.138736804       | 5.009667339 |             | 73             |
| 1.662959748                                                    | 1.356452903       | 2.192755028       |             |             |                |
| ENSG00000172893                                                | 2137.243879       | 2056.01181        | 2262.741714 |             |                |
| 3492.457154                                                    | 4946.631179       | 3393.585833       | 2151.999134 |             |                |

|                                    |                                              |             |                |                |
|------------------------------------|----------------------------------------------|-------------|----------------|----------------|
| 3944.224722                        | -0.873728204                                 | 2.36E-08    | 1.08E-05       | DHCR7          |
| 11                                 | 71428193                                     | 71452868    | - 4160         |                |
| protein_coding                     | 7-dehydrocholesterol reductase [Source:HGNC  |             |                |                |
| Symbol;Acc:HGNC:2860]              | -                                            | 2222 2363   | 2432 3169      | 4081           |
| 3676                               | 25.82569041                                  | 24.75306537 | 27.29080057    |                |
| 42.3292869                         | 60.30045989                                  | 41.08782858 |                |                |
| ENSG00000185567                    | 2601.820293                                  | 2379.683581 | 3317.81947     |                |
| 1740.167196                        | 1203.627729                                  | 1283.211183 | 2766.441115    |                |
| 1409.002036                        | 0.973307642                                  | 4.16E-08    | 1              | AHNAK2 14      |
| 104937244                          | 104978357                                    | -           | 18771          | protein_coding |
| AHNAK nucleoprotein 2 [Source:HGNC |                                              |             |                |                |
| Symbol;Acc:HGNC:20125]             | -                                            | 2705 2735   | 3566 1579      | 993 1390       |
| 6.967565759                        | 6.34933905                                   | 8.868291604 | 4.674194327    |                |
| 3.251690476                        | 3.443169548                                  |             |                |                |
| ENSG00000137310                    | 1799.632447                                  | 1821.088751 | 2067.356944    |                |
| 3192.694343                        | 3152.704655                                  | 2861.837889 | 1896.026047    |                |
| 3069.078963                        | -0.694647523                                 | 8.78E-08    | 3.17E-05       | TCF19          |
| 6                                  | 31158542                                     | 31167159    | + 3538         |                |
| protein_coding                     | transcription factor 19 [Source:HGNC         |             |                |                |
| Symbol;Acc:HGNC:11629]             | Others                                       | 1871 2093   | 2222 2897      | 2601           |
| 3100                               | 25.56920207                                  | 25.77923334 | 29.31785968    |                |
| 45.49908996                        | 45.18870377                                  | 40.74130007 |                |                |
| ENSG00000188486                    | 4075.383579                                  | 3967.589443 | 4610.150161    |                |
| 6392.001101                        | 6237.531009                                  | 6536.06847  | 4217.707728    |                |
| 6388.533527                        | -0.599112744                                 | 1.03E-07    | 3.17E-05       | H2AFX          |
| 11                                 | 119093854                                    | 119095467   | - 1614         |                |
| protein_coding                     | H2A histone family member X [Source:HGNC     |             |                |                |
| Symbol;Acc:HGNC:4739]              | -                                            | 4237 4560   | 4955 5800      | 5146           |
| 7080                               | 126.9276239                                  | 123.1175345 | 143.3131904    |                |
| 199.6808914                        | 195.9808386                                  | 203.9673932 |                |                |
| ENSG00000116133                    | 5156.509646                                  | 3934.526198 | 4950.677902    |                |
| 7583.337858                        | 9215.691461                                  | 6849.947464 | 4680.571249    |                |
| 7882.992261                        | -0.751974055                                 | 1.57E-07    | 4.12E-05       | DHCR24         |
| 1                                  | 54849627                                     | 54887271    | - 6290         |                |
| protein_coding                     | 24-dehydrocholesterol reductase [Source:HGNC |             |                |                |
| Symbol;Acc:HGNC:2859]              | -                                            | 5361 4522   | 5321 6881      | 7603           |
| 7420                               | 41.20940825                                  | 31.32842129 | 39.49013781    |                |
| 60.78731433                        | 74.29878387                                  | 54.85096568 |                |                |
| ENSG00000134824                    | 6015.446992                                  | 6123.661075 | 7994.958695    |                |
| 13860.72377                        | 14472.62344                                  | 8374.106934 | 6711.355587    |                |
| 12235.81805                        | -0.86630761                                  | 9.92E-07    | 0.000227623    | FADS2          |
| 11                                 | 61792980                                     | 61867354    | + 11026        |                |
| protein_coding                     | fatty acid desaturase 2 [Source:HGNC         |             |                |                |
| Symbol;Acc:HGNC:3575]              | -                                            | 6254 7038   | 8593 12577     | 11940          |
| 9071                               | 27.42465073                                  | 27.81569221 | 36.38085149    |                |
| 63.38275559                        | 66.56312437                                  | 38.25323751 |                |                |
| ENSG00000137857                    | 88.49074565                                  | 27.84273294 | 70.71067855    |                |
| 5.510345777                        | 0                                            | 1.846347025 | 62.34805238    | 2.452230934    |
| 4.656022391                        | 4.07E-06                                     | 1           | DUOX1          | 15             |
| 45129933                           | 45165576                                     | + 8784      | protein_coding | dual           |

|                                                           |                                        |             |             |                |
|-----------------------------------------------------------|----------------------------------------|-------------|-------------|----------------|
| oxidase 1 [Source:HGNC Symbol;Acc:HGNC:3062]              | -                                      | 92          | 32          |                |
| 76                                                        | 5                                      | 0           | 2           | 0.506403521    |
| 0.403893906                                               | 0.03162931                             | 0           | 0.010586897 | 0.158750919    |
| ENSG00000115758                                           | 5353.690112                            | 4725.43383  | 4933.930637 |                |
| 6449.308698                                               | 7483.582676                            | 7960.5252   | 5004.351526 |                |
| 7297.805524                                               | -0.544415778                           | 6.17E-06    | 0.001258086 | ODC1           |
| 2                                                         | 10439968                               | 10448504    | -           | 2968           |
| protein_coding                                            | ornithine decarboxylase 1 [Source:HGNC |             |             |                |
| Symbol;Acc:HGNC:8109]                                     | -                                      | 5566        | 5431        | 5303           |
| 8623                                                      | 90.67352966                            | 79.73968284 | 83.40724307 | 5852           |
| 109.5601112                                               | 127.8645306                            | 135.0907173 |             | 6174           |
| ENSG00000167615                                           | 2322.882073                            | 1444.341771 | 2527.906758 |                |
| 1110.885709                                               | 1218.173079                            | 1127.194859 | 2098.376868 |                |
| 1152.084549                                               | 0.864992883                            | 8.38E-06    | 1           | LENG8          |
| 54448887                                                  | 54462037                               | +           | 6469        | 19             |
| leukocyte receptor cluster member 8 [Source:HGNC          |                                        |             |             | protein_coding |
| Symbol;Acc:HGNC:15500]                                    | -                                      | 2415        | 1660        | 2717           |
| 1221                                                      | 18.05016601                            | 11.18225868 | 19.60643    | 1008           |
| 8.658355724                                               | 9.549404081                            | 8.776261011 |             | 1005           |
| ENSG00000105011                                           | 732.9342194                            | 656.0443948 | 876.4402526 |                |
| 1671.838909                                               | 1421.807982                            | 1083.805704 | 755.1396223 |                |
| 1392.484198                                               | -0.882485311                           | 8.73E-06    | 1           | ASF1B          |
| 14119509                                                  | 14136956                               | -           | 2304        | 19             |
| anti-silencing function 1B histone chaperone [Source:HGNC |                                        |             |             | protein_coding |
| Symbol;Acc:HGNC:20996]                                    | -                                      | 762         | 754         | 942            |
| 1174                                                      | 15.99092967                            | 14.26091755 | 19.08597998 | 1517           |
| 36.5860185                                                | 31.2941311                             | 23.69281374 |             | 1173           |
| ENSG00000165029                                           | 711.7733889                            | 671.7059321 | 466.1322363 |                |
| 307.4772944                                               | 178.1805399                            | 301.8777387 | 616.5371857 |                |
| 262.5118576                                               | 1.229816883                            | 9.39E-06    | 1           | ABCA1          |
| 104781002                                                 | 104928237                              | -           | 11350       | 9              |
| ATP binding cassette subfamily A member 1 [Source:HGNC    |                                        |             |             | protein_coding |
| Symbol;Acc:HGNC:29]                                       | -                                      | 740         | 772         | 501            |
| 327                                                       | 3.152369193                            | 2.964012539 | 2.060572503 | 279            |
| 1.365904656                                               | 0.796102217                            | 1.339623968 |             | 147            |
| ENSG00000196230                                           | 32233.71596                            | 31872.96853 | 30615.86301 |                |
| 42975.18672                                               | 44387.56035                            | 39229.33525 | 31574.1825  |                |
| 42197.36077                                               | -0.418376976                           | 1.66E-05    | 0.003040965 | TUBB           |
| 6                                                         | 30720201                               | 30725426    | +           | 3359           |
| protein_coding                                            | tubulin beta class I [Source:HGNC      |             |             |                |
| Symbol;Acc:HGNC:20778]                                    | -                                      | 33512       | 36632       | 32906          |
| 42494                                                     | 482.3825178                            | 475.2358825 | 457.3104498 | 38995          |
| 645.0761191                                               | 670.1248088                            | 588.2319746 |             | 36620          |
| ENSG00000114270                                           | 2227.658336                            | 1518.29903  | 2551.16685  |                |
| 1261.869183                                               | 1263.021242                            | 1072.727622 | 2099.041405 |                |
| 1199.206016                                               | 0.80786716                             | 1.84E-05    | 1           | COL7A1         |
| 48564073                                                  | 48595267                               | -           | 11071       | 3              |
| collagen type VII alpha 1 chain [Source:HGNC              |                                        |             |             | protein_coding |
| Symbol;Acc:HGNC:2214]                                     | -                                      | 2316        | 1745        | 2742           |
| 1162                                                      | 10.11469801                            | 6.868583437 | 11.56183149 | 1145           |
|                                                           |                                        |             |             | 1042           |

|                                     |                                         |                |                      |                |           |      |      |    |   |
|-------------------------------------|-----------------------------------------|----------------|----------------------|----------------|-----------|------|------|----|---|
| 5.746860823                         | 5.785331224                             | 4.88034243     |                      |                |           |      |      |    |   |
| ENSG00000141030                     | 3347.25864                              | 3386.372393    | 3328.984314          |                |           |      |      |    |   |
| 4626.486314                         | 4797.54134                              | 4438.618249    | 3354.205116          |                |           |      |      |    |   |
| 4620.881968                         | -0.462051879                            | 2.65E-05       | 0.004416978          | COPS3          |           |      |      |    |   |
| 17                                  | 17246820                                | 17281293       | -                    | 2788           |           |      |      |    |   |
| protein_coding                      | COP9 signalosome subunit 3 [Source:HGNC |                |                      |                |           |      |      |    |   |
| Symbol;Acc:HGNC:2239]               | -                                       | 3480           | 3892                 | 3578           | 4198      | 3958 |      |    |   |
| 4808                                | 60.35144752                             | 60.83291953    | 59.90921136          |                |           |      |      |    |   |
| 83.6684471                          | 87.26304846                             | 80.18676772    |                      |                |           |      |      |    |   |
| ENSG00000254527                     | 36.55052538                             | 26.10256213    | 18.6080733           | 0              |           |      |      |    |   |
| 0                                   | 0                                       | 27.0870536     | 0                    | 7.101184645    |           |      |      |    |   |
| 2.87E-05                            | 1                                       | ENPP7P12       | 8                    | 12205759       |           |      |      |    |   |
| 12206389                            | -                                       | 631            | processed_pseudogene | ectonucleotide |           |      |      |    |   |
| pyrophosphatase/phosphodiesterase 7 | pseudogene 12 [Source:HGNC              |                |                      |                |           |      |      |    |   |
| Symbol;Acc:HGNC:48697]              | -                                       | 38             | 30                   | 20             | 0         | 0    |      |    |   |
| 0                                   | 2.911759183                             | 2.071812711    | 1.479608005          | 0              |           |      |      |    |   |
| 0                                   | 0                                       |                |                      |                |           |      |      |    |   |
| ENSG00000179698                     | 38.47423724                             | 43.50427021    | 6.512825656          | 0              |           |      |      |    |   |
| 0                                   | 0                                       | 29.49711104    | 0                    | 7.224634276    |           |      |      |    |   |
| 2.90E-05                            | 1                                       | WDR97          | 8                    | 144107726      | 144118315 |      |      |    |   |
| +                                   | 8967                                    | protein_coding | WD repeat domain     | 97             |           |      |      |    |   |
| [Source:HGNC                        | Symbol;Acc:HGNC:26959]                  |                |                      |                |           | -    | 40   | 50 | 7 |
| 0                                   | 0                                       | 0              | 0.215682068          | 0.242986101    |           |      |      |    |   |
| 0.036441555                         | 0                                       | 0              | 0                    |                |           |      |      |    |   |
| ENSG00000146670                     | 915.6868463                             | 897.9281372    | 805.7295741          |                |           |      |      |    |   |
| 1580.367169                         | 1206.051954                             | 1461.383671    | 873.1148525          |                |           |      |      |    |   |
| 1415.934264                         | -0.697875686                            | 3.27E-05       | 1                    | CDCA5          | 11        |      |      |    |   |
| 65066300                            | 65084164                                | -              | 3925                 | protein_coding |           |      |      |    |   |
| cell division cycle associated 5    | [Source:HGNC                            |                |                      |                |           |      |      |    |   |
| Symbol;Acc:HGNC:14626]              | -                                       | 952            | 1032                 | 866            | 1434      | 995  |      |    |   |
| 1583                                | 11.72731266                             | 11.45773132    | 10.29969269          |                |           |      |      |    |   |
| 20.30119178                         | 15.58227196                             | 18.75306556    |                      |                |           |      |      |    |   |
| ENSG00000111863                     | 733.8960753                             | 948.3930906    | 940.6381055          |                |           |      |      |    |   |
| 466.1752527                         | 504.2388068                             | 529.9015963    | 874.3090905          |                |           |      |      |    |   |
| 500.1052186                         | 0.805781529                             | 3.86E-05       | 1                    | ADTRP          | 6         |      |      |    |   |
| 11712054                            | 11807046                                | -              | 4150                 | protein_coding |           |      |      |    |   |
| androgen dependent TFPI             | regulating protein [Source:HGNC         |                |                      |                |           |      |      |    |   |
| Symbol;Acc:HGNC:21214]              | -                                       | 763            | 1090                 | 1011           | 423       | 416  |      |    |   |
| 574                                 | 8.889506621                             | 11.44555875    | 11.37232061          |                |           |      |      |    |   |
| 5.663753118                         | 6.16158713                              | 6.431241436    |                      |                |           |      |      |    |   |
| ENSG00000187778                     | 1202.319914                             | 1152.863161    | 1166.726196          |                |           |      |      |    |   |
| 1622.245797                         | 1852.107925                             | 1808.496911    | 1173.969757          |                |           |      |      |    |   |
| 1760.950211                         | -0.584995272                            | 3.93E-05       | 1                    | MCRS1          | 12        |      |      |    |   |
| 49556544                            | 49568153                                | -              | 3269                 | protein_coding |           |      |      |    |   |
| microspherule protein 1             | [Source:HGNC                            |                |                      |                |           |      |      |    |   |
| Symbol;Acc:HGNC:6960]               | -                                       | 1250           | 1325                 | 1254           | 1472      | 1528 | 1959 |    |   |
| 18.48827145                         | 17.66280017                             | 17.9072399     | 25.02101556          |                |           |      |      |    |   |
| 28.7313342                          | 27.86445374                             |                |                      |                |           |      |      |    |   |
| ENSG00000240342                     | 6749.343067                             | 7002.447333    | 7245.983744          |                |           |      |      |    |   |
| 8726.183573                         | 9689.627455                             | 10114.28901    | 6999.258048          |                |           |      |      |    |   |

|                                                                  |                                                |                               |                          |                   |
|------------------------------------------------------------------|------------------------------------------------|-------------------------------|--------------------------|-------------------|
| 9510.033344                                                      | -0.442295515                                   | 3.94E-05                      | 0.006028478              | RPS2P5            |
| 12                                                               | 118246084                                      | 118246962                     | + 879                    |                   |
| processed_pseudogene                                             | ribosomal protein S2 pseudogene 5 [Source:HGNC |                               |                          |                   |
| Symbol;Acc:HGNC:31386]                                           | -                                              | 7017 8048                     | 7788 7918                | 7994              |
| 10956                                                            | 385.9791256                                    | 398.9860307                   | 413.6024509              |                   |
| 500.5398579                                                      | 559.0139286                                    | 579.5543457                   |                          |                   |
| ENSG00000089157                                                  | 36136.92733                                    | 40262.332                     | 42767.86528              |                   |
| 47242.39849                                                      | 61490.46795                                    | 59038.79249                   | 39722.37487              |                   |
| 55923.88631                                                      | -0.493507862                                   | 4.64E-05                      | 0.006369658              | RPLP0             |
| 12                                                               | 120196686                                      | 120201235                     | - 4001                   |                   |
| protein_coding                                                   | ribosomal protein lateral stalk subunit P0     |                               |                          |                   |
| [Source:HGNC Symbol;Acc:HGNC:10371]                              | -                                              |                               | 37570 46274              | 45967             |
| 42867                                                            | 50730 63952                                    | 454.0188248                   | 503.9959988              |                   |
| 536.319571                                                       | 595.3420838                                    | 779.3699758                   | 743.2186475              |                   |
| ENSG00000231595                                                  | 30.77938979                                    | 20.0119643                    | 25.12089896              | 0                 |
| 0                                                                | 0                                              | 25.30408435                   | 0                        | 7.00284443        |
| 4.71E-05                                                         | 1                                              | AC005224.1                    | 17                       | 14210488          |
| 14217922                                                         | +                                              | 1537                          | lincRNA novel transcript | -                 |
| 32                                                               | 23                                             | 27                            | 0                        | 0                 |
| 0.652097547                                                      | 0.820041691                                    | 0                             | 0                        | 1.006647287       |
| ENSG00000160408                                                  | 15.3896949                                     | 25.23247672                   | 36.28574294              | 0                 |
| 0                                                                | 0                                              | 25.63597152                   | 0                        | 7.022149988       |
| 4.81E-05                                                         | 1                                              | ST6GALNAC6                    | 9                        | 127885321         |
| 127905408                                                        | -                                              | 5307                          | protein_coding "ST6 N-   |                   |
| acetylgalactosaminide alpha-2,6-sialyltransferase 6 [Source:HGNC |                                                |                               |                          |                   |
| Symbol;Acc:HGNC:23364]"                                          | -                                              | 16                            | 29                       | 39                |
| 0                                                                | 0.145771328                                    | 0.238126379                   | 0.343053264              | 0                 |
| 0                                                                | 0                                              |                               |                          |                   |
| ENSG00000142230                                                  | 2960.592555                                    | 2741.639109                   | 2910.302665              |                   |
| 4066.635183                                                      | 3858.154139                                    | 3946.566767                   | 2870.844776              |                   |
| 3957.118697                                                      | -0.463070535                                   | 4.86E-05                      | 0.006369658              | SAE1              |
| 19                                                               | 47113274                                       | 47210636                      | + 3396                   |                   |
| protein_coding                                                   | SUM01 activating enzyme subunit 1 [Source:HGNC |                               |                          |                   |
| Symbol;Acc:HGNC:30660]                                           | -                                              | 3078 3151                     | 3128 3690                | 3183              |
| 4275                                                             | 43.8230046                                     | 40.43331222                   | 42.99768747              |                   |
| 60.37688852                                                      | 57.61244642                                    | 58.53282101                   |                          |                   |
| ENSG00000129003                                                  | 1268.687973                                    | 1182.446064                   | 1136.022875              |                   |
| 830.9601432                                                      | 721.2069472                                    | 560.3663222                   | 1195.718971              |                   |
| 704.1778042                                                      | 0.764864413                                    | 4.88E-05                      | 1                        | VPS13C 15         |
| 61852389                                                         | 62060473                                       | -                             | 19703                    | protein_coding    |
| vacuolar protein sorting 13 homolog C [Source:HGNC               |                                                |                               |                          |                   |
| Symbol;Acc:HGNC:23594]                                           | -                                              | 1319 1359                     | 1221 754                 | 595               |
| 607                                                              | 3.236783523                                    | 3.005700455                   | 2.892872829              |                   |
| 2.126429713                                                      | 1.856230775                                    | 1.432475991                   |                          |                   |
| ENSG00000229163                                                  | 0                                              | 0                             | 18.73517564              | 14.5453502        |
| 38.77328753                                                      | 0                                              | 24.01793779                   | -7.151429952             |                   |
| 5.22E-05                                                         | 1                                              | NAP1L1P2                      | Y                        | 2929001 2931120 - |
| 1089                                                             | processed_pseudogene                           | nucleosome assembly protein 1 |                          |                   |
| like 1 pseudogene 2 [Source:HGNC Symbol;Acc:HGNC:38005]          | -                                              |                               |                          | 0                 |
| 0                                                                | 0                                              | 17                            | 12                       | 42                |
|                                                                  |                                                |                               | 0                        | 0                 |
|                                                                  |                                                |                               | 0                        | 0                 |

|                                      |                                                                   |              |                |                |      |             |
|--------------------------------------|-------------------------------------------------------------------|--------------|----------------|----------------|------|-------------|
|                                      | 0.867427298                                                       | 0.677330647  | 1.793297854    |                |      |             |
| ENSG0000073756                       | 202.9516014                                                       | 220.1316073  | 150.7253938    |                |      |             |
| 465.0731836                          | 424.2393807                                                       | 356.3449759  | 191.2695342    |                |      |             |
| 415.2191801                          | -1.117343433                                                      | 5.27E-05     | 1              | PTGS2          | 1    |             |
| 186671791                            | 186680427                                                         | -            | 5269           | protein_coding |      |             |
|                                      | prostaglandin-endoperoxide synthase 2 [Source:HGNC                |              |                |                |      |             |
| Symbol;Acc:HGNC:9605]                | -                                                                 | 211          | 253            | 162            | 422  | 350         |
| 386                                  | 1.936223439                                                       | 2.092429915  | 1.435267503    |                |      |             |
| 4.45037181                           | 4.083073577                                                       | 3.406356705  |                |                |      |             |
| ENSG00000101057                      | 1224.4426                                                         | 1164.174271  | 1397.466305    |                |      |             |
| 2399.204551                          | 2094.530428                                                       | 1622.939035  | 1262.027725    |                |      |             |
| 2038.891338                          | -0.691663815                                                      | 5.29E-05     | 1              | MYBL2          | 20   |             |
| 43667019                             | 43716496                                                          | +            | 2777           | protein_coding |      |             |
|                                      | MYB proto-oncogene like 2 [Source:HGNC Symbol;Acc:HGNC:7548]      |              |                |                |      |             |
| MYB                                  | 1273                                                              | 1338         | 1502           | 2177           | 1728 | 1758        |
| 22.16428574                          | 20.99610961                                                       | 25.24876201  | 43.56067421    |                |      |             |
| 38.24857139                          | 29.43567567                                                       |              |                |                |      |             |
| ENSG0000010256                       | 3671.404088                                                       | 3452.498884  | 3927.233871    |                |      |             |
| 4672.773219                          | 5390.26436                                                        | 5303.631831  | 3683.712281    |                |      |             |
| 5122.223137                          | -0.475662462                                                      | 6.42E-05     | 0.00786335     |                |      | UQCRC1      |
| 3                                    | 48599002                                                          | 48610976     | -              | 3236           |      |             |
|                                      | protein_coding ubiquinol-cytochrome c reductase core protein 1    |              |                |                |      |             |
| [Source:HGNC Symbol;Acc:HGNC:12585]  | -                                                                 |              | 3817           | 3968           | 4221 |             |
| 4240                                 | 4447                                                              | 5745         | 57.0315091     | 53.4344998     |      |             |
| 60.89096756                          | 72.80637149                                                       | 84.47067735  | 82.54913717    |                |      |             |
| ENSG00000196460                      | 852.2043548                                                       | 773.5059244  | 1009.487977    |                |      |             |
| 511.3600881                          | 564.8444326                                                       | 427.4293364  | 878.3994186    |                |      |             |
| 501.2112857                          | 0.81061857                                                        | 6.73E-05     | 1              | RFX8           | 2    |             |
| 101397361                            | 101474703                                                         | -            | 2854           | protein_coding |      |             |
|                                      | "RFX family member 8, lacking RFX DNA binding domain              |              |                |                |      |             |
| [Source:HGNC Symbol;Acc:HGNC:37253]" | RFX                                                               |              | 886            | 889            | 1085 |             |
| 464                                  | 466                                                               | 463          | 15.01000959    | 13.57395453    |      |             |
| 17.74687152                          | 9.033916153                                                       | 10.03643111  | 7.543241992    |                |      |             |
| ENSG00000185813                      | 653.1001771                                                       | 660.3948218  | 760.1397945    |                |      |             |
| 1088.844326                          | 1133.325203                                                       | 1071.804448  | 691.2115978    |                |      |             |
| 1097.991326                          | -0.667530015                                                      | 6.81E-05     | 1              | PCYT2          | 17   |             |
| 81900965                             | 81911464                                                          | -            | 6897           | protein_coding |      |             |
|                                      | "phosphate cytidyltransferase 2, ethanolamine [Source:HGNC        |              |                |                |      |             |
| Symbol;Acc:HGNC:8756]"               | -                                                                 | 679          | 759            | 817            | 988  | 935         |
| 1161                                 | 4.760041782                                                       | 4.795569039  | 5.529780165    |                |      |             |
| 7.959921087                          | 8.332949408                                                       | 7.827138378  |                |                |      |             |
| ENSG00000254995                      | 23.08454234                                                       | 26.10256213  | 21.3992843     |                |      | 0           |
| 0                                    | 0                                                                 | 23.52879626  | 0              | 6.898341234    |      |             |
| 8.17E-05                             | 1                                                                 | STX16-NPEPL1 | 20             | 58651434       |      |             |
| 58715410                             | +                                                                 | 3859         | protein_coding | STX16-NPEPL1   |      |             |
|                                      | readthrough (NMD candidate) [Source:HGNC Symbol;Acc:HGNC:41993] - |              |                |                |      |             |
| 24                                   | 30                                                                | 23           | 0              | 0              | 0    | 0.300702944 |
| 0.338770101                          | 0.278226885                                                       | 0            | 0              | 0              |      |             |
| ENSG00000251050                      | 19.23711862                                                       | 22.62222051  | 26.98170629    |                |      | 0           |
| 0                                    | 0                                                                 | 22.94701514  | 0              | 6.862170183    |      |             |

|                                                             |                                                 |                |                      |                |             |             |
|-------------------------------------------------------------|-------------------------------------------------|----------------|----------------------|----------------|-------------|-------------|
| 0.000101052                                                 | 1                                               | AC112184.1     | 5                    | 80019609       |             |             |
| 80019920                                                    | +                                               | 312            | processed_pseudogene | ring-box 1     |             |             |
| (RBX1) pseudogene                                           | -                                               | 20             | 26                   | 29             | 0           | 0           |
| 0                                                           | 3.099392788                                     | 3.631427279    | 4.338997898          | 0              |             |             |
| 0                                                           | 0                                               |                |                      |                |             |             |
| ENSG00000124766                                             | 1197.510634                                     | 1542.661422    | 1030.887261          |                |             |             |
| 692.0994296                                                 | 700.6010344                                     | 843.7805906    | 1257.019772          |                |             |             |
| 745.4936849                                                 | 0.75324673                                      | 0.000105682    | 1                    | SOX4           | 6           |             |
| 21592768                                                    | 21598619                                        | +              | 5852                 | protein_coding |             |             |
| SRY-box 4 [Source:HGNC Symbol;Acc:HGNC:11200]               |                                                 | HMG            | 1245                 |                |             |             |
| 1773                                                        | 1108                                            | 628            | 578                  | 914            | 10.28646732 |             |
| 13.20270793                                                 | 8.838559274                                     | 5.963035158    | 6.071148854          |                |             |             |
| 7.262278447                                                 |                                                 |                |                      |                |             |             |
| ENSG00000150672                                             | 3.847423724                                     | 31.32307455    | 41.86816493          | 0              |             |             |
| 0                                                           | 0                                               | 25.6795544     | 0                    | 7.024952204    |             |             |
| 0.000105795                                                 | 1                                               | DLG2           | 11                   | 83455012       | 85627922    |             |
| -                                                           | 16709                                           | protein_coding | discs large          | MAGUK scaffold |             |             |
| protein 2 [Source:HGNC Symbol;Acc:HGNC:2901]                | -                                               | 4              | 36                   |                |             |             |
| 45                                                          | 0                                               | 0              | 0                    | 0.011574727    | 0.093888119 |             |
| 0.125721076                                                 | 0                                               | 0              | 0                    |                |             |             |
| ENSG00000099250                                             | 6226.093441                                     | 6094.078171    | 6748.217784          |                |             |             |
| 5159.887786                                                 | 4401.180547                                     | 4321.375213    | 6356.129799          |                |             |             |
| 4627.481182                                                 | 0.457973969                                     | 0.000111898    | 0.012840275          |                | NRP1        |             |
| 10                                                          | 33177492                                        | 33336262       | -                    | 11522          |             |             |
| protein_coding                                              | neuropilin 1 [Source:HGNC Symbol;Acc:HGNC:8004] | -              |                      |                |             |             |
| 6473                                                        | 7004                                            | 7253           | 4682                 | 3631           | 4681        | 27.16307624 |
| 26.48968929                                                 | 29.38568659                                     | 22.57956558    | 19.37071887          |                |             |             |
| 18.89042759                                                 |                                                 |                |                      |                |             |             |
| ENSG00000198482                                             | 215.4557285                                     | 144.4341771    | 100.4835958          |                |             |             |
| 40.77655875                                                 | 35.15126297                                     | 51.69771671    | 153.4578338          |                |             |             |
| 42.54184615                                                 | 1.846828916                                     | 0.00011429     | 1                    | ZNF808         | 19          |             |
| 52527652                                                    | 52564464                                        | +              | 5008                 | protein_coding |             |             |
| zinc finger protein 808 [Source:HGNC Symbol;Acc:HGNC:33230] |                                                 |                |                      |                |             |             |
| zf-C2H2                                                     | 224                                             | 166            | 108                  | 37             | 29          | 56          |
| 2.162643402                                                 | 1.444449509                                     | 1.006712523    | 0.410534299          |                |             |             |
| 0.355943477                                                 | 0.51994179                                      |                |                      |                |             |             |
| ENSG00000079459                                             | 3219.331801                                     | 2959.16046     | 3096.383398          |                |             |             |
| 4525.095952                                                 | 5511.475612                                     | 3712.080695    | 3091.625219          |                |             |             |
| 4582.884086                                                 | -0.567551648                                    | 0.000120366    | 0.012999581          |                | FDFT1       |             |
| 8                                                           | 11795573                                        | 11839309       | +                    | 5202           |             |             |
| protein_coding                                              | farnesyl-diphosphate farnesyltransferase 1      |                |                      |                |             |             |
| [Source:HGNC Symbol;Acc:HGNC:3629]                          | -                                               | 3347           | 3401                 | 3328           |             |             |
| 4106                                                        | 4547                                            | 4021           | 31.10903797          | 28.49015958    |             |             |
| 29.86475839                                                 | 43.85919344                                     | 53.72815985    | 35.9413796           |                |             |             |
| ENSG00000167900                                             | 933.000253                                      | 1257.273409    | 1220.689609          |                |             |             |
| 2378.265237                                                 | 2296.953218                                     | 1317.368603    | 1136.987757          |                |             |             |
| 1997.529019                                                 | -0.812267602                                    | 0.000131135    | 1                    | TK1            | 17          |             |
| 78174075                                                    | 78187233                                        | -              | 1861                 | protein_coding |             |             |
| thymidine kinase 1 [Source:HGNC Symbol;Acc:HGNC:11830]      | -                                               |                |                      |                |             |             |
| 970                                                         | 1445                                            | 1312           | 2158                 | 1895           | 1427        | 25.20151084 |

|                                                                     |                                                           |             |                                    |             |                |
|---------------------------------------------------------------------|-----------------------------------------------------------|-------------|------------------------------------|-------------|----------------|
|                                                                     | 33.83608223                                               | 32.91042553 | 64.43429942                        | 62.5907566  |                |
|                                                                     | 35.65402939                                               |             |                                    |             |                |
| ENSG00000279425                                                     | 31.74124572                                               | 6.960683234 | 56.75462358                        |             |                |
| 1.102069155                                                         | 0                                                         | 0           | 31.81885084                        | 0.367356385 |                |
| 6.371191191                                                         | 0.000139208                                               | 1           | AC092279.2                         | 19          |                |
| 24078481                                                            | 24080669                                                  | +           | 2189                               | TEC         | TEC -          |
|                                                                     | 33                                                        | 8           | 61                                 | 1           | 0              |
|                                                                     | 0.159258574                                               | 1.30085865  | 0.025384364                        | 0           | 0.728902425    |
| ENSG00000186871                                                     | 319.3361691                                               | 401.1093714 | 345.1797598                        |             |                |
| 786.877377                                                          | 584.2382329                                               | 576.0602719 | 355.2084334                        |             |                |
| 649.0586273                                                         | -0.869107472                                              | 0.00014297  | 1                                  | ERCC6L      | X              |
|                                                                     | 72204657                                                  | 72239047    | -                                  | 4364        | protein_coding |
|                                                                     | "ERCC excision repair 6 like, spindle assembly checkpoint |             |                                    |             |                |
| helicase [Source:HGNC Symbol;Acc:HGNC:20794]"                       | -                                                         |             |                                    | 332         | 461            |
|                                                                     | 371                                                       | 714         | 482                                | 624         | 3.67836277     |
|                                                                     | 3.968580586                                               | 9.091290044 | 6.789060151                        | 6.648610114 |                |
| ENSG00000167513                                                     | 3303.975123                                               | 3243.678387 | 3800.698972                        |             |                |
| 4161.413131                                                         | 5110.266369                                               | 5661.823154 | 3449.450827                        |             |                |
| 4977.834218                                                         | -0.52932382                                               | 0.000148836 | 0.015066501                        |             | CDT1           |
|                                                                     | 16                                                        | 88803213    | 88809258                           | +           | 3336           |
| protein_coding                                                      | chromatin licensing and DNA replication factor 1          |             |                                    |             |                |
| [Source:HGNC Symbol;Acc:HGNC:24576]                                 | -                                                         |             |                                    | 3435        | 3728           |
|                                                                     | 3776                                                      | 4216        | 6133                               | 49.78539027 | 48.69770107    |
| 57.16261061                                                         | 62.89527021                                               | 77.68227225 | 85.48264288                        |             |                |
| ENSG00000109971                                                     | 89632.46864                                               | 82091.6878  | 83199.48695                        |             |                |
| 103935.04                                                           | 112222.2252                                               | 110225.9942 | 84974.5478                         |             |                |
| 108794.4198                                                         | -0.35650451                                               | 0.000155917 | 0.015066501                        |             | HSPA8          |
|                                                                     | 11                                                        | 123057489   | 123063230                          | -           | 4849           |
| protein_coding                                                      | heat shock protein family A (Hsp70) member 8              |             |                                    |             |                |
| [Source:HGNC Symbol;Acc:HGNC:5241]                                  | -                                                         |             |                                    | 93187       | 94349          |
|                                                                     | 94309                                                     | 92584       | 119399                             | 929.1896485 | 847.8982035    |
| 860.8809297                                                         | 1080.719529                                               | 1173.629767 | 1144.931551                        |             |                |
| ENSG00000106133                                                     | 7.694847448                                               | 26.10256213 | 34.42493561                        |             | 0              |
|                                                                     | 0                                                         | 0           | 22.74078173                        | 0           | 6.849525207    |
| 0.000159348                                                         | 1                                                         | NSUN5P2     | 7                                  | 72947581    | 72954790       |
|                                                                     | -                                                         | 2576        | transcribed_unprocessed_pseudogene |             | NOP2/          |
| Sun RNA methyltransferase family member 5 pseudogene 2 [Source:HGNC |                                                           |             |                                    |             |                |
| Symbol;Acc:HGNC:16609]                                              | -                                                         | 8           | 30                                 | 37          | 0              |
|                                                                     | 0                                                         | 0.150156918 | 0.507497601                        | 0.670504815 | 0              |
|                                                                     | 0                                                         |             |                                    |             |                |
| ENSG00000254266                                                     | 24.04639827                                               | 22.62222051 | 17.67766964                        |             | 0              |
|                                                                     | 0                                                         | 0           | 21.44876281                        | 0           | 6.764679253    |
| 0.00016848                                                          | 1                                                         | PKIA-AS1    | 8                                  | 78426103    |                |
| 78558503                                                            | -                                                         | 2656        | lincRNA PKIA antisense RNA 1       |             |                |
| [Source:HGNC Symbol;Acc:HGNC:51659]                                 | -                                                         |             |                                    | 25          | 26             |
|                                                                     | 0                                                         | 0           | 0.455106622                        | 0.426583325 | 19             |
| 0.333942402                                                         | 0                                                         | 0           | 0                                  |             |                |
| ENSG00000119333                                                     | 1165.769388                                               | 1154.603331 | 1132.301261                        |             |                |
| 1818.414106                                                         | 1471.504595                                               | 1824.190861 | 1150.891327                        |             |                |
| 1704.703187                                                         | -0.56724229                                               | 0.000193753 | 1                                  | WDR34       | 9              |



|                                                                                                |              |                |                         |                |             |
|------------------------------------------------------------------------------------------------|--------------|----------------|-------------------------|----------------|-------------|
| 128633661                                                                                      | 128656787    | -              | 2604                    | protein_coding |             |
| WD repeat domain 34 [Source:HGNC Symbol;Acc:HGNC:28296] -                                      |              |                |                         |                |             |
| 1212                                                                                           | 1327         | 1217           | 1650                    | 1214           | 1976        |
| 22.20693087                                                                                    | 21.81703027  | 35.20910681    | 28.65662675             |                |             |
| 35.28393217                                                                                    |              |                |                         |                |             |
| ENSG00000072840                                                                                | 1332.170464  | 1239.001616    | 1286.748269             |                |             |
| 924.6360214                                                                                    | 655.7528713  | 857.6281933    | 1285.97345              |                |             |
| 812.672362                                                                                     | 0.661262211  | 0.00019564     | 1                       | EVC            | 4           |
| 5711197                                                                                        | 5814305 +    | 7148           | protein_coding          | EvC            | ciliary     |
| complex subunit 1 [Source:HGNC Symbol;Acc:HGNC:3497] - 1385                                    |              |                |                         |                |             |
| 1424                                                                                           | 1383         | 839            | 541                     | 929            | 9.368422017 |
| 8.681285584                                                                                    | 9.031994659  | 6.522130145    | 4.652218259             |                |             |
| 6.043133498                                                                                    |              |                |                         |                |             |
| ENSG00000186603                                                                                | 39.43609317  | 12.18119566    | 13.95605498             |                | 0           |
| 0                                                                                              | 0            | 21.85778127    | 0                       | 6.791134924    |             |
| 0.000199687                                                                                    | 1            | HPDL           | 1                       | 45326905       | 45328533    |
| +                                                                                              | 1629         | protein_coding | 4-hydroxyphenylpyruvate |                |             |
| dioxygenase like [Source:HGNC Symbol;Acc:HGNC:28242] - 41                                      |              |                |                         |                |             |
| 14                                                                                             | 15           | 0              | 0                       | 0              | 1.216925492 |
| 0.374511837                                                                                    | 0.429849287  | 0              | 0                       | 0              |             |
| ENSG00000159720                                                                                | 1670.743752  | 1974.223782    | 1706.360322             |                |             |
| 2258.139699                                                                                    | 2849.676526  | 2670.740972    | 1783.775952             |                |             |
| 2592.852399                                                                                    | -0.539389244 | 0.000200799    | 1                       | ATP6V0D1       |             |
| 16                                                                                             | 67438014     | 67481237       | -                       | 8212           |             |
| protein_coding ATPase H+ transporting V0 subunit d1 [Source:HGNC Symbol;Acc:HGNC:13724] - 2351 |              |                |                         |                |             |
| 2893                                                                                           | 10.22709039  | 12.04048977    | 10.42548881             |                |             |
| 13.86452711                                                                                    | 17.59750303  | 16.38062662    |                         |                |             |
| ENSG00000099797                                                                                | 2397.906836  | 2279.623759    | 2471.152135             |                |             |
| 3187.183997                                                                                    | 3723.60965   | 3066.782409    | 2382.894243             |                |             |
| 3325.858686                                                                                    | -0.480733685 | 0.000204397    | 0.018763635             |                | TECR        |
| 19                                                                                             | 14517085     | 14565980       | +                       | 5918           |             |
| protein_coding "trans-2,3-enoyl-CoA reductase [Source:HGNC Symbol;Acc:HGNC:4551]" - 3072       |              |                |                         |                |             |
| 3322                                                                                           | 20.36800693  | 19.29234094    | 20.95072931             |                |             |
| 27.1540974                                                                                     | 31.90756119  | 26.10091218    |                         |                |             |
| ENSG00000179532                                                                                | 732.9342194  | 436.7828729    | 587.0847127             |                |             |
| 320.7021242                                                                                    | 235.1498282  | 333.2656381    | 585.6006017             |                |             |
| 296.3725302                                                                                    | 0.980699097  | 0.000206404    | 1                       | DNHD1          | 11          |
| 6497260                                                                                        | 6593758 +    | 19629          | protein_coding          | dynein heavy   |             |
| chain domain 1 [Source:HGNC Symbol;Acc:HGNC:26532] - 762                                       |              |                |                         |                |             |
| 502                                                                                            | 631          | 291            | 194                     | 361            | 1.876972946 |
| 1.114459113                                                                                    | 1.500642424  | 0.82377168     | 0.607506481             |                |             |
| 0.85514556                                                                                     |              |                |                         |                |             |
| ENSG00000219470                                                                                | 31.74124572  | 20.0119643     | 12.09524765             |                | 0           |
| 0                                                                                              | 0            | 21.28281922    | 0                       | 6.753176427    |             |
| 0.000207302                                                                                    | 1            | AL355802.1     | 6                       | 43538822       |             |
| 43539703                                                                                       | -            | 882            | processed_pseudogene    | 40S ribosomal  |             |
| protein S2 (RPS2) pseudogene - 33 23 13 0                                                      |              |                |                         |                |             |
| 0                                                                                              | 0            | 1.809033342    | 1.136364999             | 0.688051273    |             |

|                                                  |                                                       |                |                            |             |             |             |        |
|--------------------------------------------------|-------------------------------------------------------|----------------|----------------------------|-------------|-------------|-------------|--------|
| 0                                                | 0                                                     | 0              |                            |             |             |             |        |
| ENSG00000248323                                  | 1143.646702                                           |                | 1927.23917                 |             | 1184.403866 |             |        |
| 790.1835844                                      | 825.4486236                                           |                | 878.8611841                |             | 1418.429913 |             |        |
| 831.4977974                                      | 0.77061159                                            |                | 0.000223771                |             | 1           | LUCAT1      | 5      |
| 91054834                                         | 91314547                                              |                | -                          |             | 16538       | antisense   |        |
| lung cancer associated transcript 1 [Source:HGNC |                                                       |                |                            |             |             |             |        |
| Symbol;Acc:HGNC:48498]                           | -                                                     |                | 1189                       | 2215        | 1273        | 717         | 681    |
| 952                                              | 3.476162607                                           |                | 5.836457679                |             | 3.593283241 |             |        |
| 2.409063301                                      | 2.531112709                                           |                | 2.676609277                |             |             |             |        |
| ENSG00000254910                                  | 21.16083048                                           |                | 25.23247672                |             | 14.88645864 |             | 0      |
| 0                                                | 0                                                     | 20.42658862    | 0                          |             | 6.69445621  |             |        |
| 0.000248671                                      | 1                                                     | AC136475.2     | 11                         |             | 310139      | 311141      | -      |
| 392                                              | antisense                                             |                | novel transcript           |             | -           |             | 22     |
| 29                                               | 16                                                    | 0              | 0                          | 0           | 2.713550012 |             |        |
| 3.223818095                                      | 1.905372757                                           |                | 0                          | 0           | 0           |             |        |
| ENSG00000071054                                  | 8827.913734                                           |                | 7832.508809                |             | 7776.313834 |             |        |
| 6325.876952                                      | 6381.772398                                           |                | 5731.061167                |             | 8145.578792 |             |        |
| 6146.236839                                      | 0.406423765                                           |                | 0.000255204                |             | 0.021487853 |             | MAP4K4 |
| 2                                                | 101696850                                             |                | 101894689                  |             | +           | 11961       |        |
| protein_coding                                   | mitogen-activated protein kinase kinase kinase kinase |                |                            |             |             |             |        |
| 4 [Source:HGNC                                   | Symbol;Acc:HGNC:6866]                                 | -              |                            |             | 9178        | 9002        | 8358   |
| 5740                                             | 5265                                                  | 6208           | 37.1006723                 |             | 32.79669764 |             |        |
| 32.61977133                                      | 26.66591225                                           |                | 27.05691301                |             | 24.133218   |             |        |
| ENSG00000184009                                  | 122007.5774                                           |                | 127926.0467                |             | 130604.4841 |             |        |
| 157820.7113                                      | 160482.485                                            |                | 159034.1779                |             | 126846.0361 |             |        |
| 159112.4581                                      | -0.326966765                                          |                | 0.000262595                |             | 0.021487853 |             | ACTG1  |
| 17                                               | 81509971                                              |                | 81523847                   |             | -           | 2993        |        |
| protein_coding                                   | actin gamma 1 [Source:HGNC                            |                |                            |             |             |             |        |
| Symbol;Acc:HGNC:144]                             | -                                                     |                |                            |             |             |             |        |
| 126846                                           | 147027                                                | 140374         | 143204                     | 132399      | 172269      | 2049.138326 |        |
| 2140.666323                                      |                                                       | 2189.40444     |                            | 2658.645762 |             | 2719.101054 |        |
| 2676.279294                                      |                                                       |                |                            |             |             |             |        |
| ENSG00000187144                                  | 48.09279655                                           |                | 2.610256213                |             | 18.6080733  |             | 0      |
| 0                                                | 0                                                     | 23.10370869    | 0                          |             | 6.870775843 |             |        |
| 0.000284082                                      | 1                                                     | SPATA21        | 1                          | 16387117    |             | 16437424    |        |
| -                                                | 4506                                                  | protein_coding | spermatogenesis associated |             |             |             | 21     |
| [Source:HGNC                                     | Symbol;Acc:HGNC:28026]                                | -              |                            |             | 50          | 3           | 20     |
| 0                                                | 0                                                     | 0              | 0.536512733                |             | 0.029012735 |             |        |
| 0.207197659                                      | 0                                                     | 0              | 0                          |             |             |             |        |
| ENSG00000168003                                  | 17709.6914                                            |                | 15000.27237                |             | 15635.43359 |             |        |
| 19557.31923                                      | 21005.90991                                           |                | 24404.09181                |             | 16115.13245 |             |        |
| 21655.77365                                      | -0.426415511                                          |                | 0.000288782                |             | 0.021487853 |             | SLC3A2 |
| 11                                               | 62856102                                              |                | 62888875                   |             | +           | 5178        |        |
| protein_coding                                   | solute carrier family 3 member 2 [Source:HGNC         |                |                            |             |             |             |        |
| Symbol;Acc:HGNC:11026]                           | -                                                     |                |                            |             |             |             |        |
| 26435                                            | 171.9254369                                           |                | 145.0887747                |             | 16805       | 17746       | 17330  |
| 190.4366244                                      | 205.7234869                                           |                | 237.3822745                |             |             |             |        |
| ENSG00000100297                                  | 2922.118318                                           |                | 2652.020312                |             | 3124.295508 |             |        |
| 3882.589635                                      | 3816.942314                                           |                | 4085.042794                |             | 2899.478046 |             |        |
| 3928.191581                                      | -0.438276297                                          |                | 0.000291908                |             | 0.021487853 |             | MCM5   |
| 22                                               | 35400063                                              |                | 35425430                   |             | +           | 7338        |        |

|                                       |                                                      |          |             |                |           |                |
|---------------------------------------|------------------------------------------------------|----------|-------------|----------------|-----------|----------------|
| protein_coding                        | minichromosome maintenance complex component 5       |          |             |                |           |                |
| [Source:HGNC Symbol;Acc:HGNC:6948]    | -                                                    | 3038     | 3048        | 3358           |           |                |
| 3523                                  | 3149                                                 | 4425     | 20.01756644 | 18.10072011    |           |                |
| 21.3623497                            | 26.67761369                                          |          | 26.3780273  | 28.03926245    |           |                |
| ENSG00000167553                       | 9584.894352                                          |          | 9135.896745 | 8803.47948     |           |                |
| 11243.30952                           | 12575.66736                                          |          | 11810.15875 | 9174.756859    |           |                |
| 11876.37854                           | -0.37232495                                          |          | 0.000295247 | 0.021487853    |           | TUBA1C         |
| 12                                    | 49188736                                             |          | 49274603    | +              | 4631      |                |
| protein_coding                        | tubulin alpha 1c [Source:HGNC Symbol;Acc:HGNC:20768] |          |             |                |           |                |
| -                                     | 9965                                                 | 10500    | 9462        | 10202          | 10375     | 12793          |
| 104.0408133                           | 98.80367895                                          |          | 95.37931489 | 122.4116021    |           |                |
| 137.70848                             | 128.4483817                                          |          |             |                |           |                |
| ENSG00000244313                       | 1849.648955                                          |          | 2291.804955 | 2397.650245    |           |                |
| 3086.895704                           | 3100.583817                                          |          | 3034.471336 | 2179.701385    |           |                |
| 3073.983619                           | -0.495814139                                         |          | 0.000304294 | 0.021487853    |           |                |
| AC024293.1                            | 11                                                   | 46428653 | 46429150    | -              |           | 498            |
| processed_pseudogene                  | ribosomal protein S10 (RPS10)                        |          |             |                |           |                |
| pseudogene                            | -                                                    | 1923     | 2634        | 2577           | 2801      | 2558 3287      |
| 186.7029405                           | 230.4862519                                          |          | 241.5633877 | 312.5329489    |           |                |
| 315.7319687                           | 306.9031737                                          |          |             |                |           |                |
| ENSG00000196123                       | 496.3176604                                          |          | 402.8495422 | 489.3923279    |           |                |
| 251.2717674                           | 276.3616537                                          |          | 224.3311636 | 462.8531768    |           |                |
| 250.6548616                           | 0.88590099                                           |          | 0.000310326 | 1              |           | KIAA0895L      |
| 16                                    | 67175602                                             |          | 67184040    | -              |           | 4780           |
| protein_coding                        | KIAA0895 like [Source:HGNC Symbol;Acc:HGNC:34408]    |          |             |                |           |                |
| -                                     | 516                                                  | 463      | 526         | 228            | 228       | 243            |
| 5.219429328                           | 4.220964428                                          |          | 5.136932787 | 2.650446205    |           |                |
| 2.931934816                           | 2.363792744                                          |          |             |                |           |                |
| ENSG00000141499                       | 899.3352954                                          |          | 759.5845579 | 834.5720877    |           |                |
| 1084.436049                           | 1301.808843                                          |          | 1503.849652 | 831.1639803    |           |                |
| 1296.698181                           | -0.642292935                                         |          | 0.000316801 | 1              |           | WRAP53 17      |
| 7686071                               | 7703502                                              | +        | 5087        | protein_coding | WD repeat |                |
| containing antisense to TP53          | [Source:HGNC Symbol;Acc:HGNC:25522]                  |          |             |                |           |                |
| -                                     | 935                                                  | 873      | 897         | 984            | 1074      | 1629           |
| 8.886916297                           | 7.478441553                                          |          | 8.23145752  | 10.74843921    |           |                |
| 12.97746613                           | 14.88985144                                          |          |             |                |           |                |
| ENSG00000169908                       | 1779.433472                                          |          | 2885.2032   | 2536.280391    |           |                |
| 4061.124838                           | 4003.607641                                          |          | 3099.093482 | 2400.305688    |           |                |
| 3721.27532                            | -0.632173768                                         |          | 0.000321556 | 0.021865841    |           | TM4SF1         |
| 3                                     | 149369022                                            |          | 149377865   | -              |           | 3668           |
| protein_coding                        | transmembrane 4 L six family member 1 [Source:HGNC   |          |             |                |           |                |
| Symbol;Acc:HGNC:11853]                | -                                                    |          | 1850        | 3316           | 2726      | 3685 3303      |
| 3357                                  | 24.38617117                                          |          | 39.39524381 | 34.69305626    |           |                |
| 55.82390446                           | 55.35114471                                          |          | 42.55523885 |                |           |                |
| ENSG00000101096                       | 46.16908469                                          |          | 58.29572208 | 66.05866023    |           |                |
| 103.5945006                           | 220.604478                                           |          | 194.7896112 | 56.84115567    |           |                |
| 172.9961966                           | -1.605161356                                         |          | 0.000322574 | 1              |           | NFATC2 20      |
| 51386957                              | 51562831                                             |          | -           | 8286           |           | protein_coding |
| nuclear factor of activated T cells 2 | [Source:HGNC                                         |          |             |                |           |                |
| Symbol;Acc:HGNC:7776]                 | RHD                                                  | 48       | 67          | 71             | 94        | 182            |

|                                                                 |              |             |                          |                |             |             |
|-----------------------------------------------------------------|--------------|-------------|--------------------------|----------------|-------------|-------------|
| 211                                                             | 0.280089949  | 0.352361517 | 0.399999507              |                |             |             |
| 0.630369175                                                     | 1.350124503  | 1.184045917 |                          |                |             |             |
| ENSG00000120658                                                 | 195.256754   | 163.576056  | 217.7144577              |                |             |             |
| 321.8041934                                                     | 438.7847309  | 387.7328753 | 192.1824225              |                |             |             |
| 382.7739332                                                     | -0.994124002 | 0.0003252   | 1                        | ENOX1          | 13          |             |
| 43213518                                                        | 43786908     | -           | 3101                     | protein_coding |             |             |
| ecto-NOX disulfide-thiol exchanger 1 [Source:HGNC               |              |             |                          |                |             |             |
| Symbol;Acc:HGNC:25474]                                          | -            | 203         | 188                      | 234            | 292         | 362         |
| 420                                                             | 3.165158685  | 2.641889694 | 3.522574014              |                |             |             |
| 5.232305928                                                     | 7.175532974  | 6.297650316 |                          |                |             |             |
| ENSG00000171848                                                 | 752.171338   | 1249.44264  | 993.6711144              |                |             |             |
| 2639.455627                                                     | 1630.291334  | 1243.514722 | 998.4283643              |                |             |             |
| 1837.753894                                                     | -0.879682836 | 0.000333079 | 1                        | RRM2           | 2           |             |
| 10120698                                                        | 10131419     | +           | 5323                     | protein_coding |             |             |
| ribonucleotide reductase regulatory subunit M2 [Source:HGNC     |              |             |                          |                |             |             |
| Symbol;Acc:HGNC:10452]                                          | -            | 782         | 1436                     | 1068           | 2395        | 1345        |
| 1347                                                            | 7.103158463  | 11.75591863 | 9.366143823              |                |             |             |
| 25.00121387                                                     | 15.53149204  | 11.76636043 |                          |                |             |             |
| ENSG00000174371                                                 | 495.3558044  | 798.7384011 | 777.8174641              |                |             |             |
| 1459.139562                                                     | 1056.962114  | 1057.956846 | 690.6372232              |                |             |             |
| 1191.352841                                                     | -0.786147897 | 0.000355231 | 1                        | EX01           | 1           |             |
| 241847967                                                       | 241895148    | +           | 4140                     | protein_coding |             |             |
| exonuclease 1 [Source:HGNC Symbol;Acc:HGNC:3511]                |              |             |                          |                |             |             |
| 515                                                             | 918          | 836         | 1324                     | 872            | 1146        | 6.014618758 |
| 9.662754326                                                     | 9.426532564  | 17.77050164 | 12.94683174              |                |             |             |
| 12.87108904                                                     |              |             |                          |                |             |             |
| ENSG00000117410                                                 | 2894.224496  | 3022.676694 | 2937.284371              |                |             |             |
| 3619.195106                                                     | 4128.455231  | 4111.814826 | 2951.395187              |                |             |             |
| 3953.155054                                                     | -0.421602511 | 0.000372266 | 0.024410026              |                |             |             |
| ATP6V0B 1                                                       | 43974487     | 43978295    | +                        | 3535           |             |             |
| protein_coding ATPase H+ transporting V0 subunit b [Source:HGNC |              |             |                          |                |             |             |
| Symbol;Acc:HGNC:861]                                            | -            | 3009        | 3474                     | 3157           | 3284        | 3406        |
| 4454                                                            | 41.15607842  | 42.82515995 | 41.68993323              |                |             |             |
| 51.62092399                                                     | 59.2246613   | 58.58572554 |                          |                |             |             |
| ENSG00000251093                                                 | 9.618559309  | 33.06324536 | 16.74726597              | 0              |             |             |
| 0                                                               | 0            | 19.80969021 | 0                        | 6.650885519    |             |             |
| 0.000377159                                                     | 1            | AC093281.2  | 5                        | 91226475       |             |             |
| 91227071                                                        | -            | 597         | lincRNA novel transcript |                |             | -           |
| 10                                                              | 38           | 18          | 0                        | 0              | 0.809891583 |             |
| 2.7737535                                                       | 1.407486409  | 0           | 0                        | 0              |             |             |
| ENSG00000130193                                                 | 850.280643   | 866.6050626 | 1034.608876              |                |             |             |
| 1142.845714                                                     | 1532.110221  | 1641.402506 | 917.1648604              |                |             |             |
| 1438.786147                                                     | -0.649875492 | 0.000378445 | 1                        | THEM6          | 8           |             |
| 142727203                                                       | 142736927    | +           | 3055                     | protein_coding |             |             |
| thioesterase superfamily member 6 [Source:HGNC                  |              |             |                          |                |             |             |
| Symbol;Acc:HGNC:29656]                                          | -            | 884         | 996                      | 1112           | 1037        | 1264        |
| 1778                                                            | 13.99079093  | 14.20714201 | 16.99180864              |                |             |             |
| 18.86164582                                                     | 25.43215838  | 27.06148097 |                          |                |             |             |
| ENSG00000133424                                                 | 15.3896949   | 9.570939447 | 34.42493561              | 0              |             |             |
| 0                                                               | 0            | 19.79518998 | 0                        | 6.64856299     |             |             |

|                         |                        |                        |                      |                |                |             |
|-------------------------|------------------------|------------------------|----------------------|----------------|----------------|-------------|
| 0.000390682             | 1                      | LARGE1                 | 22                   | 33162226       | 33922841       |             |
| -                       | 10687                  | protein_coding         | LARGE                | xylosyl-       | and            |             |
| glucuronyltransferase 1 | [Source:HGNC           | Symbol;Acc:HGNC:6511]  |                      |                |                | -           |
| 16                      | 11                     | 37                     | 0                    | 0              | 0              | 0.072387802 |
| 0.044853411             |                        | 0.161618827            |                      | 0              | 0              | 0           |
| ENSG00000119725         | 32.70310165            | 20.8820497             |                      | 6.512825656    |                | 0           |
| 0                       | 0                      | 20.032659              |                      | 0              | 6.665881168    |             |
| 0.000397739             | 1                      | ZNF410                 | 14                   | 73886617       | 73932511       |             |
| +                       | 6486                   | protein_coding         | zinc                 | finger         | protein        | 410         |
| [Source:HGNC            | Symbol;Acc:HGNC:20144] |                        | zf-C2H2              | 34             | 24             | 7           |
| 0                       | 0                      | 0                      | 0.253456357          | 0.161247465    |                |             |
| 0.05038104              | 0                      | 0                      | 0                    |                |                |             |
| ENSG00000207751         | 25.0082542             | 17.40170808            |                      | 14.88645864    |                | 0           |
| 0                       | 0                      | 19.09880698            |                      | 0              | 6.597025424    |             |
| 0.00039967              | 1                      | AP000553.1             | 22                   | 21652270       |                |             |
| 21670237                | +                      | 1093                   | processed_transcript | novel          |                |             |
| transcript              | -                      | 26                     | 20                   | 16             | 0              | 0           |
| 1.150149785             |                        | 0.797385679            |                      | 0.683354182    | 0              | 0           |
| 0                       |                        |                        |                      |                |                |             |
| ENSG00000255142         | 19.23711862            | 12.18119566            |                      | 25.12089896    |                | 0           |
| 0                       | 0                      | 18.84640441            |                      | 0              | 6.577720518    |             |
| 0.000453753             | 1                      | AP006621.2             | 11                   | 781645         | 782105         | +           |
| 284                     | lincRNA                | novel                  | transcript           | -              | 20             | 14          |
| 27                      | 0                      | 0                      | 0                    | 3.404966725    | 2.14816825     |             |
| 4.438042532             |                        | 0                      | 0                    |                |                |             |
| ENSG00000097021         | 1882.352057            | 2221.328037            |                      | 2366.946924    |                |             |
| 2826.807384             | 3156.340992            | 3013.238346            |                      | 2156.875673    |                |             |
| 2998.795574             | -0.475284209           | 0.000469891            |                      | 0.02905492     |                | ACOT7       |
| 1                       | 6264269                | 6394391                | -                    | 4124           | protein_coding | acyl-       |
| CoA thioesterase 7      | [Source:HGNC           | Symbol;Acc:HGNC:24157] |                      |                |                | 1957        |
| 2553                    | 2544                   | 2565                   | 2604                 | 3264           | 22.94422461    |             |
| 26.97682011             | 28.79681698            | 34.56055885            |                      | 38.81232716    |                |             |
| 36.80124503             |                        |                        |                      |                |                |             |
| ENSG00000088325         | 1714.989125            | 1797.596445            |                      | 1900.814688    |                |             |
| 3036.200523             | 2478.770096            | 2241.465289            |                      | 1804.466753    |                |             |
| 2585.478636             | -0.518610025           | 0.000485404            |                      | 1              | TPX2           | 20          |
| 31739271                | 31801805               | +                      | 3605                 | protein_coding |                |             |
| "TPX2, microtubule      | nucleation             | factor                 | [Source:HGNC         |                |                |             |
| Symbol;Acc:HGNC:1249]"  | -                      | 1783                   | 2066                 | 2043           | 2755           | 2045        |
| 2428                    | 23.9137283             | 24.97374344            |                      | 26.4550833     |                |             |
| 42.46473105             | 34.8686717             | 31.31658747            |                      |                |                |             |
| ENSG00000182481         | 3725.268021            | 3608.244171            |                      | 3289.90736     |                |             |
| 5351.647819             | 4890.874003            | 4231.827382            |                      | 3541.139851    |                |             |
| 4824.783068             | -0.446056652           | 0.000488327            |                      | 0.02905492     |                | KPNA2       |
| 17                      | 68035519               | 68046842               | +                    | 3140           |                |             |
| protein_coding          | karyopherin            | subunit                | alpha                | 2              | [Source:HGNC   |             |
| Symbol;Acc:HGNC:6395]   | -                      | 3873                   | 4147                 | 3536           | 4856           | 4035        |
| 4584                    | 59.63744999            | 57.55233985            |                      | 52.56887029    |                |             |
| 85.93321765             | 78.98802431            | 67.88064792            |                      |                |                |             |
| ENSG00000197912         | 4976.642587            | 4105.933023            |                      | 4785.06605     |                |             |

|                                          |                                                   |             |             |                |                  |
|------------------------------------------|---------------------------------------------------|-------------|-------------|----------------|------------------|
| 3004.240518                              | 3247.249431                                       | 3778.549188 | 4622.54722  |                |                  |
| 3343.346379                              | 0.467027879                                       | 0.000490579 | 0.02905492  | SPG7           |                  |
| 16                                       | 89490719                                          | 89557768    | + 36008     |                |                  |
| protein_coding                           | "SPG7, paraplegin matrix AAA peptidase subunit    |             |             |                |                  |
| [Source:HGNC Symbol;Acc:HGNC:11237]"     | -                                                 | 5174        | 4719        | 5143           |                  |
| 2726                                     | 2679                                              | 4093        | 6.947501368 | 5.710966007    |                  |
| 6.667508227                              | 4.206674367                                       | 4.573209257 | 5.285350133 |                |                  |
| ENSG00000130584                          | 243.3495505                                       | 251.4546818 | 241.9049529 |                |                  |
| 135.5545061                              | 87.27210117                                       | 105.2417805 | 245.5697284 |                |                  |
| 109.3561292                              | 1.166360556                                       | 0.000522608 | 1           | ZBTB46         | 20               |
| 63743666                                 | 63831244                                          | -           | 6084        | protein_coding |                  |
| zinc finger and BTB domain containing 46 | [Source:HGNC                                      |             |             |                |                  |
| Symbol;Acc:HGNC:16094]                   | -                                                 | 253         | 289         | 260            | 123 72           |
| 114                                      | 2.010631732                                       | 2.069985175 | 1.994941562 |                |                  |
| 1.123383264                              | 0.727429068                                       | 0.87125777  |             |                |                  |
| ENSG00000090615                          | 5730.737637                                       | 4275.599676 | 5640.107018 |                |                  |
| 3860.548251                              | 3499.368835                                       | 3891.176356 | 5215.481444 |                |                  |
| 3750.364481                              | 0.475541356                                       | 0.000524808 | 0.030110856 | GOLGA3         |                  |
| 12                                       | 132768909                                         | 132828858   | -           | 10549          |                  |
| protein_coding                           | golgin A3 [Source:HGNC Symbol;Acc:HGNC:4426]      |             |             |                | -                |
| 5958                                     | 4914                                              | 6062        | 3503        | 2887           | 4215 27.30803325 |
| 20.29936523                              | 26.82567604                                       | 18.45189135 | 16.82220231 |                |                  |
| 18.57878482                              |                                                   |             |             |                |                  |
| ENSG00000125971                          | 2780.725496                                       | 2967.861314 | 2866.573692 |                |                  |
| 3505.681983                              | 4224.212119                                       | 3846.864028 | 2871.720168 |                |                  |
| 3858.919377                              | -0.426110887                                      | 0.000543821 | 0.030256217 |                |                  |
| DYNLRB1                                  | 20                                                | 34516409    | 34540958    | + 2460         |                  |
| protein_coding                           | dynein light chain roadblock-type 1 [Source:HGNC  |             |             |                |                  |
| Symbol;Acc:HGNC:15468]                   | -                                                 | 2891        | 3411        | 3081           | 3181 3485        |
| 4167                                     | 56.82169715                                       | 60.42340707 | 58.46589833 |                |                  |
| 71.85228861                              | 87.07932131                                       | 78.76248528 |             |                |                  |
| ENSG00000188177                          | 621.3589314                                       | 476.8068015 | 367.5094478 |                |                  |
| 270.0069431                              | 225.452928                                        | 275.1057068 | 488.5583936 |                |                  |
| 256.8551926                              | 0.926467583                                       | 0.000579781 | 1           | ZC3H6          | 2                |
| 112275594                                | 112340063                                         | +           | 11803       | protein_coding |                  |
| zinc finger CCCH-type containing 6       | [Source:HGNC                                      |             |             |                |                  |
| Symbol;Acc:HGNC:24762]                   | -                                                 | 646         | 548         | 395            | 245 186          |
| 298                                      | 2.646313713                                       | 2.023236956 | 1.562250687 |                |                  |
| 1.153415334                              | 0.968652263                                       | 1.173964259 |             |                |                  |
| ENSG00000112715                          | 3837.805164                                       | 5628.58248  | 5914.5761   |                |                  |
| 3560.785441                              | 3832.699777                                       | 3069.55193  | 5126.987915 |                |                  |
| 3487.679049                              | 0.55614878                                        | 0.000585378 | 0.031530171 | VEGFA          |                  |
| 6                                        | 43770184                                          | 43786487    | + 14431     |                |                  |
| protein_coding                           | vascular endothelial growth factor A [Source:HGNC |             |             |                |                  |
| Symbol;Acc:HGNC:12680]                   | -                                                 | 3990        | 6469        | 6357           | 3231 3162        |
| 3325                                     | 13.36834625                                       | 19.53436608 | 20.56372657 |                |                  |
| 12.44092222                              | 13.46830055                                       | 10.71337338 |             |                |                  |
| ENSG00000166803                          | 219.3031523                                       | 160.0957144 | 196.3151734 |                |                  |
| 524.584918                               | 332.1188295                                       | 320.3412089 | 191.90468   |                |                  |
| 392.3483188                              | -1.031985418                                      | 0.000587937 | 1           | PCLAF          | 15               |

|                                                                   |                                 |               |                      |                 |                 |
|-------------------------------------------------------------------|---------------------------------|---------------|----------------------|-----------------|-----------------|
| 64364311                                                          | 64387687                        | -             | 3734                 | protein_coding  |                 |
| PCNA clamp associated factor [Source:HGNC                         |                                 |               |                      |                 |                 |
| Symbol;Acc:HGNC:28961]                                            | -                               | 228           | 184                  | 211             | 476 274         |
| 347                                                               | 2.952308588                     | 2.147346393   | 2.637874791          |                 |                 |
| 7.083447554                                                       | 4.510488807                     | 4.321019033   |                      |                 |                 |
| ENSG00000120279                                                   | 8.656703379                     | 22.62222051   | 10.23444032          |                 |                 |
| 24.24552142                                                       | 139.3929394                     | 90.47100425   | 13.83778807          |                 |                 |
| 84.70315501                                                       | -2.609028105                    | 0.000599424   | 1                    | MYCT1           | 6               |
| 152697895                                                         | 152724567                       | +             | 3030                 | protein_coding  |                 |
| MYC target 1 [Source:HGNC Symbol;Acc:HGNC:23172]                  |                                 |               |                      |                 |                 |
| 9                                                                 | 26                              | 11            | 22                   | 115             | 98 0.143615428  |
| 0.373929146                                                       | 0.169471273                     | 0.403452207   | 2.332934642          |                 |                 |
| 1.503884438                                                       |                                 |               |                      |                 |                 |
| ENSG00000113575                                                   | 2576.812039                     | 2788.623721   | 2293.445035          |                 |                 |
| 3453.884733                                                       | 3511.48996                      | 3367.736974   | 2552.960265          |                 |                 |
| 3444.370556                                                       | -0.43190731                     | 0.000601065   | 0.031530171          | PPP2CA          |                 |
| 5                                                                 | 134194334                       | 134226142     | -                    | 5661            |                 |
| protein_coding                                                    | protein phosphatase 2 catalytic | subunit alpha |                      |                 |                 |
| [Source:HGNC Symbol;Acc:HGNC:9299]                                |                                 |               |                      |                 |                 |
| 3134                                                              | 2897                            | 3648          | 22.88130421          | 24.67138194     | 2465            |
| 20.326837                                                         | 30.76223467                     | 31.45594237   | 29.96351045          |                 |                 |
| ENSG00000258458                                                   | 18.27526269                     | 14.79145187   | 20.46888063          | 0               |                 |
| 0                                                                 | 0                               | 17.8451984    | 0                    | 6.499142424     |                 |
| 0.000613949                                                       | 1                               | AL160314.2    | 14                   | 22701476        |                 |
| 22766562                                                          | -                               | 2513          | processed_transcript | "novel          |                 |
| transcript, antisense to OXA1L"                                   |                                 |               |                      |                 |                 |
| 0                                                                 | 0                               | 0.365563081   | 0.29479155           | 0.408673266     | 0               |
| 0                                                                 | 0                               | 0             |                      |                 |                 |
| ENSG00000140365                                                   | 584.808406                      | 642.9931137   | 632.6744923          |                 |                 |
| 867.3284253                                                       | 905.4480497                     | 1094.883786   | 620.1586707          |                 |                 |
| 955.8867537                                                       | -0.62474632                     | 0.000627548   | 1                    | COMMD4          | 15              |
| 75335891                                                          | 75343224                        | +             | 6779                 | protein_coding  |                 |
| COMM domain containing 4 [Source:HGNC Symbol;Acc:HGNC:26027]      |                                 |               |                      |                 |                 |
| -                                                                 | 608                             | 739           | 680                  | 787             | 747 1186        |
| 4.336498114                                                       | 4.750478996                     | 4.682624301   | 6.450912365          |                 |                 |
| 6.77333145                                                        | 8.134859814                     |               |                      |                 |                 |
| ENSG00000225806                                                   | 0                               | 0             | 0                    | 19.8372448      | 21.81802529     |
| 9.231735127                                                       | 0                               | 16.96233507   | -6.645410704         |                 |                 |
| 0.000630072                                                       | 1                               | AL121917.1    | 20                   | 58863528        |                 |
| 58888809                                                          | -                               | 1521          | antisense            | uncharacterized |                 |
| LOC101927932 [Source:NCBI gene;Acc:101927932]                     |                                 |               |                      |                 |                 |
| 0                                                                 | 18                              | 18            | 10                   | 0               | 0 0             |
| 0.657590204                                                       | 0.727429068                     | 0.305704481   |                      |                 |                 |
| ENSG00000209082                                                   | 69.25362703                     | 95.70939447   | 73.50188955          |                 |                 |
| 197.2703788                                                       | 226.6650405                     | 161.5553647   | 79.48830368          |                 |                 |
| 195.1635947                                                       | -1.29374168                     | 0.000633478   | 1                    | MT-TL1          | MT              |
| 3230                                                              | 3304                            | +             | 75                   | Mt_tRNA         | mitochondrially |
| encoded tRNA leucine 1 (UUA/G) [Source:HGNC Symbol;Acc:HGNC:7490] |                                 |               |                      |                 |                 |
| -                                                                 | 72                              | 110           | 79                   | 179             | 187 175         |
| 46.41650639                                                       | 63.91312012                     | 49.17131962   | 132.6184083          |                 |                 |

|                                                                                              |                                                                              |             |             |                |                |             |       |
|----------------------------------------------------------------------------------------------|------------------------------------------------------------------------------|-------------|-------------|----------------|----------------|-------------|-------|
| 153.2596055                                                                                  | 108.4945202                                                                  |             |             |                |                |             |       |
| ENSG00000108518                                                                              | 10419.7853                                                                   | 10878.67781 | 12184.5664  |                |                |             |       |
| 14268.48936                                                                                  | 14348.98797                                                                  | 14203.02449 | 11161.00984 |                |                |             |       |
| 14273.50061                                                                                  | -0.354862241                                                                 | 0.000633596 | 0.032313373 | PFN1           |                |             |       |
| 17                                                                                           | 4945652                                                                      | 4949061     | -           | 1987           | protein_coding |             |       |
| profilin 1 [Source:HGNC Symbol;Acc:HGNC:8881]                                                |                                                                              |             |             |                |                | 10833       | 12503 |
| 13096                                                                                        | 12947                                                                        | 11838       | 15385       | 263.6040585    | 274.2047425    |             |       |
| 307.6711927                                                                                  | 362.0623155                                                                  | 366.2080011 | 360.0233358 |                |                |             |       |
| ENSG00000117318                                                                              | 2162.252133                                                                  | 2257.871624 | 2483.247382 |                |                |             |       |
| 2759.581165                                                                                  | 3226.643518                                                                  | 3648.381722 | 2301.123713 |                |                |             |       |
| 3211.535469                                                                                  | -0.481162835                                                                 | 0.000661357 | 0.032817595 | ID3            |                |             |       |
| 1                                                                                            | 23557918                                                                     | 23559794    | -           | 1797           |                |             |       |
| protein_coding                                                                               | "inhibitor of DNA binding 3, HLH protein [Source:HGNC Symbol;Acc:HGNC:5362]" | bHLH        | 2248        | 2595           | 2669           | 2504        | 2662  |
| 3952                                                                                         | 60.4852453                                                                   | 62.92857289 | 69.33404412 |                |                |             |       |
| 77.42804452                                                                                  | 91.05574127                                                                  | 102.2586081 |             |                |                |             |       |
| ENSG00000242071                                                                              | 129.8505507                                                                  | 203.5999846 | 260.5130263 |                |                |             |       |
| 523.4828488                                                                                  | 638.7832961                                                                  | 240.0251133 | 197.9878538 |                |                |             |       |
| 467.4304194                                                                                  | -1.237628339                                                                 | 0.000662158 | 1           | RPL7AP6        | 14             |             |       |
| 69885340                                                                                     | 69886140                                                                     | -           | 801         |                |                |             |       |
| processed_pseudogene                                                                         | ribosomal protein L7a pseudogene 6                                           |             |             |                |                |             |       |
| [Source:HGNC Symbol;Acc:HGNC:19785]                                                          |                                                                              |             |             |                |                | 135         | 234   |
| 475                                                                                          | 527                                                                          | 260         | 8.148965308 | 12.73039676    |                |             | 280   |
| 16.31817368                                                                                  | 32.95134431                                                                  | 40.44133274 | 15.09287065 |                |                |             |       |
| ENSG00000160796                                                                              | 1124.409583                                                                  | 772.635839  | 887.6050966 |                |                |             |       |
| 567.565615                                                                                   | 608.4804832                                                                  | 566.8285368 | 928.2168396 |                |                |             |       |
| 580.9582117                                                                                  | 0.675991052                                                                  | 0.000670311 | 1           | NBEAL2         | 3              |             |       |
| 46979683                                                                                     | 47009703                                                                     | +           | 9819        | protein_coding |                |             |       |
| neurobeachin like 2 [Source:HGNC Symbol;Acc:HGNC:31928]                                      |                                                                              |             |             |                |                |             |       |
| 1169                                                                                         | 888                                                                          | 954         | 515         | 502            | 614            | 5.756366905 |       |
| 3.940980659                                                                                  | 4.53552067                                                                   | 2.914419155 | 3.14256173  |                |                |             |       |
| 2.907583055                                                                                  |                                                                              |             |             |                |                |             |       |
| ENSG00000104969                                                                              | 4692.895087                                                                  | 4183.370624 | 4304.977759 |                |                |             |       |
| 4967.025683                                                                                  | 6237.531009                                                                  | 7131.515386 | 4393.747823 |                |                |             |       |
| 6112.024026                                                                                  | -0.476390661                                                                 | 0.000679546 | 0.032832791 | SGTA           |                |             |       |
| 19                                                                                           | 2754714                                                                      | 2783371     | -           | 3801           | protein_coding | small       |       |
| glutamine rich tetratricopeptide repeat containing alpha [Source:HGNC Symbol;Acc:HGNC:10819] |                                                                              |             |             |                |                |             |       |
| 7725                                                                                         | 62.06320011                                                                  | 55.12202797 | 56.82607573 |                |                |             |       |
| 65.88730321                                                                                  | 83.21838293                                                                  | 94.4999626  |             |                |                |             |       |
| ENSG00000083223                                                                              | 2366.16559                                                                   | 2747.729707 | 2106.433898 |                |                |             |       |
| 1364.361614                                                                                  | 1718.775548                                                                  | 1850.962893 | 2406.776398 |                |                |             |       |
| 1644.700019                                                                                  | 0.549103585                                                                  | 0.00068757  | 1           | TUT7           | 9              |             |       |
| 86287733                                                                                     | 86354454                                                                     | -           | 6707        | protein_coding |                |             |       |
| terminal uridylyl transferase 7 [Source:HGNC Symbol;Acc:HGNC:25817]                          |                                                                              |             |             |                |                |             |       |
| 2005                                                                                         | 17.73405362                                                                  | 20.51834921 | 15.75774804 |                |                |             |       |
| 10.25662275                                                                                  | 12.99556856                                                                  | 13.90007325 |             |                |                |             |       |
| ENSG00000188807                                                                              | 1665.934472                                                                  | 1548.75202  | 1383.51025  |                |                |             |       |
| 1897.763086                                                                                  | 2220.59013                                                                   | 2443.640288 | 1532.732247 |                |                |             |       |



|                                    |                                                  |             |             |                |               |      |
|------------------------------------|--------------------------------------------------|-------------|-------------|----------------|---------------|------|
| 2187.331168                        | -0.513364192                                     | 0.000699769 | 1           | TMEM201        | 1             |      |
| 9588922                            | 9614873                                          | +           | 6966        | protein_coding | transmembrane |      |
| protein 201                        | [Source:HGNC Symbol;Acc:HGNC:33719]              |             |             | -              | 1732          | 1780 |
| 1487                               | 1722                                             | 1832        | 2647        | 12.02169303    | 11.13512585   |      |
| 9.964913524                        | 13.7360455                                       | 16.1655081  |             | 17.66857357    |               |      |
| ENSG00000227775                    | 29.81753386                                      | 18.27179349 | 6.512825656 | 0              |               |      |
| 0                                  | 0                                                | 18.20071767 | 0           | 6.52747843     |               |      |
| 0.000713462                        | 1                                                | AL031282.1  | 1           | 1724512        | 1737251       | +    |
| 2759                               | transcribed_processed_pseudogene                 |             |             |                | ribosomal     |      |
| protein S7 (RPS7)                  | pseudogene                                       |             |             | -              | 31            | 21   |
| 0                                  | 0                                                | 0.543264354 | 0.331685275 | 0.118438357    | 7             | 0    |
| 0                                  | 0                                                | 0           |             |                |               |      |
| ENSG00000143702                    | 5497.968501                                      | 5813.910671 | 4560.838767 |                |               |      |
| 3784.50548                         | 3955.123141                                      | 4079.503753 | 5290.90598  |                |               |      |
| 3939.710791                        | 0.425399602                                      | 0.000721628 | 0.032853751 | CEP170         |               |      |
| 1                                  | 243124428                                        | 243255348   | -           | 10939          |               |      |
| protein_coding                     | centrosomal protein 170 [Source:HGNC             |             |             |                |               |      |
| Symbol;Acc:HGNC:28920]             | -                                                | 5716        | 6682        | 4902           | 3434          | 3263 |
| 4419                               | 25.26479707                                      | 26.61873709 | 20.91903856 |                |               |      |
| 17.44354348                        | 18.33524898                                      | 18.78353798 |             |                |               |      |
| ENSG00000073111                    | 4711.17035                                       | 3843.167231 | 5163.740342 |                |               |      |
| 6110.973467                        | 6250.864247                                      | 6171.414933 | 4572.692641 |                |               |      |
| 6177.750882                        | -0.434121472                                     | 0.000733082 | 0.032853751 | MCM2           |               |      |
| 3                                  | 127598223                                        | 127622436   | +           | 4902           |               |      |
| protein_coding                     | minichromosome maintenance complex component 2   |             |             |                |               |      |
| [Source:HGNC Symbol;Acc:HGNC:6944] | -                                                | 4898        | 4417        | 5550           |               |      |
| 5545                               | 5157                                             | 6685        | 48.31107378 | 39.26564087    |               |      |
| 52.85252156                        | 62.85506607                                      | 64.66528332 | 63.41019997 |                |               |      |
| ENSG00000125166                    | 3274.157589                                      | 3140.138224 | 2925.189123 |                |               |      |
| 3888.09998                         | 4078.758617                                      | 4335.222816 | 3113.161645 |                |               |      |
| 4100.693804                        | -0.397631917                                     | 0.000739964 | 0.032853751 | GOT2           |               |      |
| 16                                 | 58707131                                         | 58734357    | -           | 3766           |               |      |
| protein_coding                     | glutamic-oxaloacetic transaminase 2 [Source:HGNC |             |             |                |               |      |
| Symbol;Acc:HGNC:4433]              | -                                                | 3404        | 3609        | 3144           | 3528          | 3365 |
| 4696                               | 43.7029197                                       | 41.76044945 | 38.9716019  |                |               |      |
| 52.05474273                        | 54.9227296                                       | 57.98007739 |             |                |               |      |
| ENSG00000136930                    | 3505.003012                                      | 3372.451027 | 3594.149359 |                |               |      |
| 4177.944168                        | 4631.481925                                      | 5048.835941 | 3490.534466 |                |               |      |
| 4619.420678                        | -0.404456991                                     | 0.00076221  | 0.032853751 | PSMB7          |               |      |
| 9                                  | 124353466                                        | 124415444   | -           | 1787           |               |      |
| protein_coding                     | proteasome subunit beta 7 [Source:HGNC           |             |             |                |               |      |
| Symbol;Acc:HGNC:9544]              | -                                                | 3644        | 3876        | 3863           | 3791          | 3821 |
| 5469                               | 98.595032                                        | 94.51871607 | 100.9127849 |                |               |      |
| 117.8803117                        | 131.4316153                                      | 142.3031092 |             |                |               |      |
| ENSG00000173821                    | 3422.283402                                      | 2979.172424 | 3807.211798 |                |               |      |
| 2389.285929                        | 2735.737949                                      | 2211.923737 | 3402.889208 |                |               |      |
| 2445.649205                        | 0.476873738                                      | 0.000775355 | 0.032853751 | RNF213         |               |      |
| 17                                 | 80260866                                         | 80398786    | +           | 28570          |               |      |
| protein_coding                     | ring finger protein 213 [Source:HGNC             |             |             |                |               |      |
| Symbol;Acc:HGNC:14539]             | -                                                | 3558        | 3424        | 4092           | 2168          | 2257 |

|                                                   |                                |                |                                    |                  |             |      |
|---------------------------------------------------|--------------------------------|----------------|------------------------------------|------------------|-------------|------|
| 2396                                              | 6.021392258                    | 5.222544069    | 6.686077718                        |                  |             |      |
| 4.216587152                                       | 4.855888197                    | 3.899488029    |                                    |                  |             |      |
| ENSG00000142657                                   | 2536.41409                     | 2648.539971    | 2554.888465                        |                  |             |      |
| 3086.895704                                       | 3769.669926                    | 3534.83138     | 2579.947508                        |                  |             |      |
| 3463.799003                                       | -0.424906887                   | 0.000787345    | 0.032853751                        | PGD              |             |      |
| 1                                                 | 10398592                       | 10420144       | +                                  | 2966             |             |      |
| protein_coding                                    | phosphogluconate dehydrogenase |                | [Source:HGNC                       |                  |             |      |
| Symbol;Acc:HGNC:8891]                             | -                              | 2637           | 3044                               | 2746             | 2801        | 3110 |
| 3829                                              | 42.9873031                     | 44.72312059    | 43.21907046                        |                  |             |      |
| 52.47518831                                       | 64.45203029                    | 60.02680634    |                                    |                  |             |      |
| ENSG00000234393                                   | 0                              | 0              | 0                                  | 7.714484088      | 8.484787614 |      |
| 35.08059348                                       | 0                              | 17.0932884     | -6.661985457                       |                  |             |      |
| 0.000797834                                       | 1                              | AL592546.1     | 10                                 | 113710681        |             |      |
| 113719332                                         | -                              | 692            | antisense                          | novel transcript |             |      |
| -                                                 | 0                              | 0              | 0                                  | 7                | 38          | 0    |
| 0                                                 | 0                              | 0.56208758     | 0.621783661                        | 2.553339244      |             |      |
| ENSG00000188897                                   | 25.97011014                    | 9.570939447    | 16.74726597                        | 0                |             |      |
| 0                                                 | 0                              | 17.42943852    | 0                                  | 6.464627698      |             |      |
| 0.000806086                                       | 1                              | AC099489.1     | 16                                 | 11359845         |             |      |
| 11527245                                          | -                              | 12027          | protein_coding                     | vitellogenin     |             |      |
| [Source:NCBI gene;Acc:400499]                     | -                              | 27             | 11                                 | 18               | 0           |      |
| 0                                                 | 0                              | 0.108544462    | 0.039856024                        | 0.069865252      |             |      |
| 0                                                 | 0                              | 0              |                                    |                  |             |      |
| ENSG00000205138                                   | 664.6424483                    | 675.1862737    | 650.352162                         |                  |             |      |
| 864.0222178                                       | 1024.235076                    | 1129.96438     | 663.393628                         |                  |             |      |
| 1006.073891                                       | -0.601185126                   | 0.000820781    | 1                                  | SDHAF1           | 19          |      |
| 35995199                                          | 35996315                       | +              | 1117                               | protein_coding   |             |      |
| succinate dehydrogenase complex assembly factor 1 |                                |                | [Source:HGNC                       |                  |             |      |
| Symbol;Acc:HGNC:33867]                            | -                              | 691            | 776                                | 699              | 784         | 845  |
| 1224                                              | 29.91066651                    | 30.27381453    | 29.21258832                        |                  |             |      |
| 39.00092731                                       | 46.49977977                    | 50.95176852    |                                    |                  |             |      |
| ENSG00000181019                                   | 277.0145081                    | 399.3692005    | 351.6925854                        |                  |             |      |
| 671.1601157                                       | 553.93542                      | 541.902852     | 342.692098                         |                  |             |      |
| 588.9994625                                       | -0.780629878                   | 0.000878986    | 1                                  | NQ01             | 16          |      |
| 69706996                                          | 69726951                       | -              | 3254                               | protein_coding   |             |      |
| NAD(P)H quinone dehydrogenase 1                   |                                |                | [Source:HGNC                       |                  |             |      |
| Symbol;Acc:HGNC:2874]                             | -                              | 288            | 459                                | 378              | 609         | 457  |
| 587                                               | 4.279333718                    | 6.146865844    | 5.422758791                        |                  |             |      |
| 10.39948392                                       | 8.632687336                    | 8.38786768     |                                    |                  |             |      |
| ENSG00000079385                                   | 19.23711862                    | 17.40170808    | 13.95605498                        | 0                |             |      |
| 0                                                 | 0                              | 16.86496056    | 0                                  | 6.417777761      |             |      |
| 0.000884845                                       | 1                              | CEACAM1        | 19                                 | 42507304         | 42561234    |      |
| -                                                 | 5524                           | protein_coding | carcinoembryonic antigen           |                  |             |      |
| related cell adhesion molecule 1                  |                                |                | [Source:HGNC Symbol;Acc:HGNC:1814] |                  |             |      |
| -                                                 | 20                             | 20             | 15                                 | 0                | 0           | 0    |
| 0.175056218                                       | 0.157773814                    | 0.126760407    | 0                                  | 0                | 0           | 0    |
| ENSG00000161203                                   | 7012.891593                    | 7268.693467    | 7938.204071                        |                  |             |      |
| 9174.725719                                       | 10379.31948                    | 9113.568918    | 7406.596377                        |                  |             |      |
| 9555.871371                                       | -0.367471181                   | 0.000885502    | 0.036128494                        | AP2M1            |             |      |
| 3                                                 | 184174689                      | 184184091      | +                                  | 4756             |             |      |

|                                                         |                                                |             |             |                |                |                |  |
|---------------------------------------------------------|------------------------------------------------|-------------|-------------|----------------|----------------|----------------|--|
| protein_coding                                          | adaptor related protein complex 2 subunit mu 1 |             |             |                |                |                |  |
| [Source:HGNC Symbol;Acc:HGNC:564]                       | -                                              | 7291        | 8354        | 8532           |                |                |  |
| 8325                                                    | 8563                                           | 9872        | 74.12188729 | 76.54401218    |                |                |  |
| 83.74425756                                             | 97.26451821                                    |             | 110.6703946 | 96.51488974    |                |                |  |
| ENSG00000174282                                         | 1923.711862                                    |             | 1751.481919 | 2207.847897    |                |                |  |
| 1340.116093                                             | 1486.049945                                    |             | 1354.295543 | 1961.013893    |                |                |  |
| 1393.487194                                             | 0.493074017                                    |             | 0.00088887  | 1              | ZBTB4          | 17             |  |
| 7459366                                                 | 7484263                                        | -           | 6126        | protein_coding | zinc finger    |                |  |
| and BTB domain containing 4                             | [Source:HGNC Symbol;Acc:HGNC:23847]            | ZBTB        |             |                |                |                |  |
| 2000                                                    | 2013                                           | 2373        | 1216        | 1226           | 1467           | 15.78535014    |  |
| 14.31941844                                             |                                                | 18.08284591 |             | 11.02982511    |                | 12.30157838    |  |
| 11.13484407                                             |                                                |             |             |                |                |                |  |
| ENSG00000163754                                         | 820.4631091                                    |             | 790.0375471 | 762.0006018    |                |                |  |
| 1149.458129                                             | 1147.870553                                    |             | 1115.193603 | 790.8337526    |                |                |  |
| 1137.507428                                             | -0.524364091                                   |             | 0.000896353 | 1              | GYG1           | 3              |  |
| 148991341                                               |                                                | 149027668   | +           | 3511           | protein_coding |                |  |
| glycogenin 1                                            | [Source:HGNC Symbol;Acc:HGNC:4699]             | -           |             |                |                | 853            |  |
| 908                                                     | 819                                            | 1043        | 947         | 1208           | 11.74679577    |                |  |
| 11.26973274                                             | 10.88927857                                    |             | 16.50690009 | 16.5793122     |                |                |  |
| 15.99805269                                             |                                                |             |             |                |                |                |  |
| ENSG00000143195                                         | 247.1969743                                    |             | 135.7333231 | 205.61921      |                |                |  |
| 577.4842374                                             | 336.9672795                                    |             | 331.4192911 | 196.1831691    |                |                |  |
| 415.2902693                                             | -1.082525192                                   |             | 0.000904516 | 1              | ILDR2          | 1              |  |
| 166895711                                               |                                                | 166975482   | -           | 13884          | protein_coding |                |  |
| immunoglobulin like domain containing receptor 2        | [Source:HGNC                                   |             |             |                |                |                |  |
| Symbol;Acc:HGNC:18131]                                  | -                                              | 257         | 156         | 221            | 524            | 278            |  |
| 359                                                     | 0.894993198                                    |             | 0.489630644 | 0.743059694    |                |                |  |
| 2.097146286                                             | 1.23077184                                     |             | 1.202294504 |                |                |                |  |
| ENSG00000092847                                         | 1839.06854                                     |             | 1485.235785 | 1665.422561    |                |                |  |
| 1255.256768                                             | 1098.17394                                     |             | 1154.890064 | 1663.242295    |                |                |  |
| 1169.440257                                             | 0.507905777                                    |             | 0.000934601 | 1              | AG01           | 1              |  |
| 35869808                                                |                                                | 35930528    | +           | 13886          | protein_coding |                |  |
| "argonaute 1, RISC catalytic component                  | [Source:HGNC                                   |             |             |                |                |                |  |
| Symbol;Acc:HGNC:3262]"                                  | -                                              | 1912        | 1707        | 1790           | 1139           | 906            |  |
| 1251                                                    | 6.657511779                                    |             | 5.356917499 | 6.01758046     |                |                |  |
| 4.557835081                                             | 4.010498857                                    |             | 4.18900778  |                |                |                |  |
| ENSG00000115268                                         | 22813.29897                                    |             | 25299.4733  | 24819.44817    |                |                |  |
| 28271.38004                                             | 31971.89184                                    |             | 31948.26576 | 24310.74015    |                |                |  |
| 30730.51255                                             | -0.338072076                                   |             | 0.00095375  | 0.037601102    |                | RPS15          |  |
| 19                                                      | 1438358                                        | 1440494     | +           | 2137           | protein_coding |                |  |
| ribosomal protein S15                                   | [Source:HGNC Symbol;Acc:HGNC:10388]            |             |             |                |                |                |  |
| 23718                                                   | 29077                                          | 26676       | 25653       | 26377          | 34607          | 536.6297665    |  |
| 592.9303379                                             |                                                | 582.7230838 |             | 667.0304848    |                | 758.6967739    |  |
| 752.9921504                                             |                                                |             |             |                |                |                |  |
| ENSG00000198899                                         | 61331.78158                                    |             | 59122.30322 | 64470.46117    |                |                |  |
| 67685.78132                                             | 86366.65312                                    |             | 87186.35289 | 61641.51532    |                |                |  |
| 80412.92911                                             | -0.383531366                                   |             | 0.000962555 | 0.037601102    |                | MT-            |  |
| ATP6                                                    | MT                                             | 8527        | 9207        | +              | 681            | protein_coding |  |
| mitochondrially encoded ATP synthase membrane subunit 6 | [Source:HGNC                                   |             |             |                |                |                |  |
| Symbol;Acc:HGNC:7414]                                   | -                                              | 63764       | 67950       | 69293          | 61417          | 71253          |  |

|                               |                                      |             |             |                 |                |             |
|-------------------------------|--------------------------------------|-------------|-------------|-----------------|----------------|-------------|
|                               | 94442                                | 4527.199758 | 4348.114249 | 4749.941798     |                |             |
| 5011.336096                   |                                      | 6431.368625 | 6448.357126 |                 |                |             |
| ENSG00000199691               | 23.08454234                          |             | 12.18119566 | 14.88645864     |                | 0           |
| 0                             | 0                                    | 16.71739888 | 0           | 6.404673554     |                |             |
| 0.000978451                   | 1                                    | RN7SKP173   | 20          | 38761528        |                |             |
| 38761842                      | +                                    | 315         | misc_RNA    | "RNA, 7SK small |                |             |
| nuclear pseudogene 173        | [Source:HGNC Symbol;Acc:HGNC:45897]" |             |             |                 |                | -           |
| 24                            | 14                                   | 16          | 0           | 0               | 0              | 3.683849714 |
| 1.936761216                   |                                      | 2.371130542 | 0           | 0               | 0              | 0           |
| ENSG00000147421               | 679.0702872                          |             | 358.4751865 | 445.6633556     |                |             |
| 263.3945281                   | 266.6647536                          |             | 252.026369  | 494.4029431     |                |             |
| 260.6952169                   | 0.923097353                          |             | 0.000993898 | 1               | HMBOX1         | 8           |
| 28890394                      |                                      | 29064764    | +           | 6634            | protein_coding |             |
| homeobox containing 1         | [Source:HGNC Symbol;Acc:HGNC:26137]  |             |             |                 |                |             |
| Homeobox                      | 706                                  | 412         | 479         | 239             | 220            | 273         |
| 5.145533978                   | 2.706327475                          |             | 3.370591196 | 2.001863575     |                |             |
| 2.038424234                   |                                      | 1.913454757 |             |                 |                |             |
| ENSG00000267519               | 886.8311683                          |             | 683.0170423 | 962.0373898     |                |             |
| 418.7862791                   | 616.9652708                          |             | 494.8210028 | 843.9618668     |                |             |
| 510.1908509                   | 0.726672401                          |             | 0.000998865 | 1               | AC020916.1     |             |
| 19                            | 13823880                             |             | 13842928    | -               | 19049          |             |
| antisense                     | novel transcript                     |             | -           | 922             | 785            | 1034        |
| 380                           | 509                                  | 536         | 2.340237616 | 1.795792166     |                |             |
| 2.533928713                   | 1.108468761                          |             | 1.642453038 | 1.308349058     |                |             |
| ENSG00000149968               | 1254.260134                          |             | 663.8751634 | 1208.594361     |                |             |
| 2007.970001                   | 1492.110508                          |             | 1659.865976 | 1042.243219     |                |             |
| 1719.982162                   | -0.723139373                         |             | 0.001044038 | 1               | MMP3           | 11          |
| 102835801                     |                                      | 102843803   | -           | 2048            | protein_coding |             |
| matrix metalloproteinase 3    | [Source:HGNC Symbol;Acc:HGNC:7173]   |             |             |                 |                |             |
| -                             | 1304                                 | 763         | 1299        | 1822            | 1231           | 1798        |
| 30.78568743                   | 16.23503329                          |             | 29.6091019  | 49.43453621     |                |             |
| 36.94668355                   | 40.82166865                          |             |             |                 |                |             |
| ENSG00000137965               | 1925.635574                          |             | 2149.981034 | 1944.54366      |                |             |
| 1603.510621                   | 1363.626581                          |             | 1392.145657 | 2006.720089     |                |             |
| 1453.094286                   | 0.465821899                          |             | 0.00106783  | 1               | IFI44          | 1           |
| 78649796                      |                                      | 78664078    | +           | 2038            | protein_coding |             |
| interferon induced protein 44 | [Source:HGNC                         |             |             |                 |                |             |
| Symbol;Acc:HGNC:16938]        | -                                    | 2002        | 2471        | 2090            | 1455           | 1125        |
| 1508                          | 47.49644555                          |             | 52.83566324 | 47.87272426     |                |             |
| 39.67079075                   | 33.93092529                          |             | 34.40552427 |                 |                |             |
| ENSG00000233927               | 1025.338422                          |             | 1249.44264  | 1353.737333     |                |             |
| 1839.35342                    | 1506.655858                          |             | 1969.129103 | 1209.506132     |                |             |
| 1771.712794                   | -0.551079967                         |             | 0.001075353 | 1               | RPS28          | 19          |
| 8321158                       | 8323340                              | +           | 2119        | protein_coding  | ribosomal      |             |
| protein S28                   | [Source:HGNC Symbol;Acc:HGNC:10418]  |             |             |                 |                | -           |
| 1455                          | 1669                                 | 1243        | 2133        | 24.32357825     | 29.53126705    |             |
| 32.05369295                   |                                      | 43.7660572  |             | 36.05682916     | 46.80485637    |             |
| ENSG00000105447               | 6714.716254                          |             | 5874.816649 | 6387.221162     |                |             |
| 7226.267452                   | 8399.939738                          |             | 9907.498139 | 6325.584688     |                |             |
| 8511.23511                    | -0.428348395                         |             | 0.001095645 | 0.041908438     |                | GRWD1       |

|                                            |                                                    |                              |       |                |             |             |
|--------------------------------------------|----------------------------------------------------|------------------------------|-------|----------------|-------------|-------------|
| 19                                         | 48445773                                           | 48457022                     | +     | 5763           |             |             |
| protein_coding                             | glutamate rich WD repeat containing 1 [Source:HGNC |                              |       |                |             |             |
| Symbol;Acc:HGNC:21270]                     | -                                                  | 6981                         | 6752  | 6865           | 6557        | 6930        |
| 10732                                      | 58.56932716                                        | 51.05548567                  |       | 55.60808737    |             |             |
| 63.22205492                                | 73.91489686                                        | 86.58906748                  |       |                |             |             |
| ENSG00000104549                            | 1485.105557                                        | 1501.767408                  |       | 1598.433497    |             |             |
| 2216.261072                                | 2215.74168                                         | 1868.50319                   |       | 1528.435487    |             |             |
| 2100.168647                                | -0.458034898                                       | 0.001100564                  |       | 1              | SQLF        | 8           |
| 124998497                                  | 125022283                                          | +                            | 4305  | protein_coding |             |             |
| squalene epoxidase [Source:HGNC            |                                                    |                              |       |                |             |             |
| Symbol;Acc:HGNC:11279]                     | -                                                  |                              |       |                |             |             |
| 1544                                       | 1726                                               | 1718                         | 2011  | 1828           | 2024        | 17.34104865 |
| 17.47134072                                | 18.62927868                                        | 25.9567885                   |       | 26.10059428    |             |             |
| 21.86091676                                |                                                    |                              |       |                |             |             |
| ENSG00000215914                            | 19.23711862                                        | 16.53162268                  |       | 13.02565131    |             | 0           |
| 0                                          | 0                                                  | 16.26479754                  | 0     | 6.365463758    |             |             |
| 0.001117954                                | 1                                                  | MMP23A                       | 1     | 1699942        | 1701782     | +           |
| unprocessed_pseudogene                     |                                                    | matrix metalloproteinase 23A |       |                |             | 1017        |
| (pseudogene) [Source:HGNC                  |                                                    |                              |       |                |             |             |
| Symbol;Acc:HGNC:7170]                      | -                                                  |                              |       | 20             |             | 19          |
| 14                                         | 0                                                  | 0                            | 0     | 0.950846165    | 0.81412529  |             |
| 0.642618344                                | 0                                                  | 0                            | 0     |                |             |             |
| ENSG00000160752                            | 1119.600304                                        | 1033.66146                   |       | 1475.620213    |             |             |
| 1575.958892                                | 2123.621129                                        | 1751.260154                  |       | 1209.627326    |             |             |
| 1816.946725                                | -0.586779239                                       | 0.001135234                  |       | 1              | FDPS        | 1           |
| 155308748                                  | 155320666                                          | +                            | 3718  | protein_coding |             |             |
| farnesyl diphosphate synthase [Source:HGNC |                                                    |                              |       |                |             |             |
| Symbol;Acc:HGNC:3631]                      | -                                                  | 1164                         | 1188  | 1586           | 1430        | 1752        |
| 1897                                       | 15.13717429                                        | 13.92405253                  |       | 19.91314396    |             |             |
| 21.37168162                                | 28.96490288                                        | 23.72405726                  |       |                |             |             |
| ENSG00000130827                            | 748.3239143                                        | 835.2819881                  |       | 1239.297682    |             |             |
| 578.5863066                                | 469.0875438                                        | 636.9897238                  |       | 940.9678615    |             |             |
| 561.5545247                                | 0.743769875                                        | 0.00115196                   |       | 1              | PLXNA3      | X           |
| 154458281                                  | 154477779                                          | +                            | 11710 | protein_coding |             |             |
| plexin A3 [Source:HGNC                     |                                                    |                              |       |                |             |             |
| Symbol;Acc:HGNC:9101]                      | -                                                  |                              |       |                |             | 778         |
| 960                                        | 1332                                               | 525                          | 387   | 690            | 3.212357847 |             |
| 3.572505744                                | 5.309985872                                        | 2.491233596                  |       | 2.031427981    |             |             |
| 2.739827458                                |                                                    |                              |       |                |             |             |
| ENSG00000104894                            | 179.8670591                                        | 130.5128106                  |       | 60.47623824    |             |             |
| 36.36828213                                | 14.5453502                                         | 45.23550212                  |       | 123.6187027    |             |             |
| 32.04971148                                | 1.939976527                                        | 0.001172861                  |       | 1              | CD37        | 19          |
| 49335171                                   | 49343335                                           | +                            | 4161  | protein_coding |             |             |
| CD37 molecule [Source:HGNC                 |                                                    |                              |       |                |             |             |
| Symbol;Acc:HGNC:1666]                      | -                                                  |                              |       |                |             |             |
| 187                                        | 150                                                | 65                           | 33    | 12             | 49          | 2.172926854 |
| 1.570913026                                | 0.729225214                                        | 0.440684999                  |       | 0.177268223    |             |             |
| 0.547557059                                |                                                    |                              |       |                |             |             |
| ENSG00000230648                            | 27.893822                                          | 18.27179349                  |       | 4.652018326    |             | 0           |
| 0                                          | 0                                                  | 16.93921127                  | 0     | 6.423918528    |             |             |
| 0.001206072                                | 1                                                  | AL138831.1                   | 6     | 4018843        | 4021215     | -           |
| 209                                        | antisense                                          | novel transcript             |       |                |             | 29          |
| 21                                         | 5                                                  | 0                            | 0     | 0              | 6.708924867 |             |
| 4.378563036                                | 1.116785468                                        | 0                            | 0     | 0              |             |             |

|                                    |                                                         |                                     |             |                 |             |                |         |
|------------------------------------|---------------------------------------------------------|-------------------------------------|-------------|-----------------|-------------|----------------|---------|
| ENSG00000268218                    | 135.6216863                                             |                                     | 115.7213588 |                 | 173.0550817 |                |         |
| 24.24552142                        | 75.15097601                                             |                                     | 30.46472592 |                 | 141.4660423 |                |         |
| 43.28707445                        | 1.71532948                                              |                                     | 0.001206508 |                 | 1           | AC137932.3     |         |
| 16                                 | 89268104                                                |                                     | 89273044    |                 | +           | 3660           |         |
| antisense                          | "novel transcript, antisense to ANKRD11"                |                                     |             |                 |             | -              |         |
| 141                                | 133                                                     | 186                                 | 22          | 62              | 33          | 1.862684256    |         |
|                                    | 1.58354042                                              |                                     | 2.372345261 |                 | 0.334005516 | 1.041257073    |         |
|                                    | 0.41924112                                              |                                     |             |                 |             |                |         |
| ENSG00000101440                    | 18.27526269                                             |                                     | 29.58290374 |                 | 3.721614661 | 0              |         |
| 0                                  | 0                                                       |                                     | 17.19326036 |                 | 0           | 6.446247125    |         |
| 0.001210081                        | 1                                                       | ASIP                                | 20          | 34194569        |             | 34269344       |         |
| +                                  | 778                                                     | protein_coding                      | agouti      | signaling       | protein     |                |         |
| [Source:HGNC Symbol;Acc:HGNC:745]  |                                                         |                                     | -           | 19              | 34          | 4              |         |
| 0                                  | 0                                                       | 0                                   | 1.180796944 |                 | 1.904398882 |                |         |
| 0.240008394                        | 0                                                       | 0                                   | 0           |                 |             |                |         |
| ENSG00000127580                    | 782.9507278                                             |                                     | 677.7965299 |                 | 726.6452625 |                |         |
| 952.1877503                        | 1067.871127                                             |                                     | 1241.668375 |                 | 729.1308401 |                |         |
| 1087.242417                        | -0.577144943                                            |                                     | 0.001217205 |                 | 1           | WDR24 16       |         |
| 684622                             | 690444                                                  | -                                   | 3651        | protein_coding  | WD repeat   |                |         |
| domain 24                          | [Source:HGNC Symbol;Acc:HGNC:20852]                     |                                     |             |                 |             | -              | 814 779 |
| 781                                | 864                                                     | 881                                 | 1345        | 10.77987658     |             | 9.297886116    |         |
|                                    | 9.985854567                                             |                                     | 13.14964272 |                 | 14.83240023 | 17.12937312    |         |
| ENSG00000196670                    | 455.9197113                                             |                                     | 530.7520966 |                 | 457.7586033 |                |         |
| 273.3131505                        | 306.6644666                                             |                                     | 281.5679214 |                 | 481.4768037 |                |         |
| 287.1818462                        | 0.746173004                                             |                                     | 0.001248835 |                 | 1           | ZFP62 5        |         |
| 180847611                          |                                                         | 180861285                           |             | -               | 4197        | protein_coding |         |
| ZFP62                              | zinc finger protein [Source:HGNC Symbol;Acc:HGNC:23241] |                                     |             |                 |             |                |         |
| zf-C2H2                            | 474                                                     | 610                                 | 492         | 248             | 253         | 305            |         |
| 5.460602819                        | 6.333582961                                             |                                     | 5.47232862  |                 | 3.283407269 |                |         |
| 3.70534723                         | 3.37902876                                              |                                     |             |                 |             |                |         |
| ENSG00000198464                    | 253.9299658                                             |                                     | 355.8649303 |                 | 319.1284572 |                |         |
| 168.6165808                        | 168.4836398                                             |                                     | 143.0918945 |                 | 309.6411178 |                |         |
| 160.0640383                        | 0.953461942                                             |                                     | 0.001322894 |                 | 1           | ZNF480 19      |         |
| 52297177                           |                                                         | 52325922                            |             | +               | 4836        | protein_coding |         |
| zinc finger protein                | 480                                                     | [Source:HGNC Symbol;Acc:HGNC:23305] |             |                 |             |                |         |
| zf-C2H2                            | 264                                                     | 409                                 | 343         | 153             | 139         | 155            |         |
| 2.63948289                         | 3.685493194                                             |                                     | 3.310959464 |                 | 1.757993165 |                |         |
| 1.766753125                        | 1.490309343                                             |                                     |             |                 |             |                |         |
| ENSG00000255741                    | 50.01650841                                             |                                     | 3.480341617 |                 | 14.88645864 | 0              |         |
| 1.212112516                        | 0                                                       |                                     | 22.79443622 |                 | 0.404037505 |                |         |
| 5.889387411                        | 0.001337678                                             |                                     | 1           | AP000808.2      | 11          |                |         |
| 68941503                           | 68942852                                                |                                     | -           | 569             | antisense   | novel          |         |
| transcript                         | -                                                       | 52                                  | 4           | 16              | 0           | 1 0            |         |
| 4.418677381                        |                                                         | 0.306341844                         |             | 1.312664536     | 0           |                |         |
| 0.108027691                        | 0                                                       |                                     |             |                 |             |                |         |
| ENSG00000240694                    | 9.618559309                                             |                                     | 14.79145187 |                 | 23.26009163 | 0              |         |
| 0                                  | 0                                                       |                                     | 15.89003427 |                 | 0           | 6.332045333    |         |
| 0.001387652                        | 1                                                       | PNMA2                               | 8           | 26504686        |             | 26514092       |         |
| -                                  | 5579                                                    | protein_coding                      | PNMA        | family member 2 |             |                |         |
| [Source:HGNC Symbol;Acc:HGNC:9159] |                                                         |                                     | -           | 10              | 17          | 25             |         |

|                           |                             |                        |                        |                          |                |
|---------------------------|-----------------------------|------------------------|------------------------|--------------------------|----------------|
| 0                         | 0                           | 0                      | 0.086665222            | 0.132785654              |                |
| 0.209184588               | 0                           | 0                      | 0                      |                          |                |
| ENSG00000083845           | 32112.52211                 |                        | 31749.4164             | 41020.56719              |                |
| 41334.20574               | 49554.796                   |                        | 47192.62997            | 34960.83524              |                |
| 46027.21057               | -0.39674749                 |                        | 0.001411621            | 0.052892589              | RPS5           |
| 19                        | 58386400                    |                        | 58394806               | + 3617                   |                |
| protein_coding            | ribosomal protein S5        | [Source:HGNC           |                        |                          |                |
| Symbol;Acc:HGNC:10426]    | -                           |                        | 33386 36490            | 44089 37506              | 40883          |
| 51120                     | 446.2899394                 |                        | 439.6265903            | 569.0203201              |                |
| 576.1880995               | 694.7708813                 |                        | 657.1633798            |                          |                |
| ENSG00000280424           | 30.77938979                 |                        | 17.40170808            | 2.791210996              | 0              |
| 0                         | 0                           | 16.99076962            | 0                      | 6.428191704              |                |
| 0.001443095               | 1                           | BX537318.2             | 22                     | 46006616                 |                |
| 46010777                  | +                           | 4162                   | TEC                    | dynein heavy chain -like |                |
| pseudogene [Source:NCBI   | gene;Acc:730668]            |                        | -                      | 32                       | 20             |
| 3                         | 0                           | 0                      | 0                      | 0.371748409              | 0.209404745    |
| 0.033648462               | 0                           | 0                      | 0                      |                          |                |
| ENSG00000119777           | 1656.315913                 |                        | 1375.605024            | 1391.883883              |                |
| 2164.463821               | 2189.075204                 |                        | 1815.8823              | 1474.601607              |                |
| 2056.473775               | -0.479601975                |                        | 0.001444259            | 1                        | TMEM214 2      |
| 27032910                  | 27041695                    |                        | +                      | 4910                     | protein_coding |
| transmembrane protein 214 | [Source:HGNC                | Symbol;Acc:HGNC:25983] |                        |                          |                |
| -                         | 1722 1581                   |                        | 1496 1964              | 1806 1967                |                |
| 16.95715038               | 14.0316575                  |                        | 14.22316137            | 22.22654888              |                |
| 22.60911766               | 18.62747057                 |                        |                        |                          |                |
| ENSG00000167766           | 386.6660842                 |                        | 356.7350157            | 345.1797598              |                |
| 212.699347                | 221.8165905                 |                        | 123.7052507            | 362.8602866              |                |
| 186.0737294               | 0.966580661                 |                        | 0.001451679            | 1                        | ZNF83 19       |
| 52594060                  | 52690496                    |                        | -                      | 8028                     | protein_coding |
| zinc finger protein 83    | [Source:HGNC                | Symbol;Acc:HGNC:13158] |                        |                          |                |
| zf-C2H2                   | 402 410                     |                        | 371 193                | 183 134                  |                |
| 2.421140016               | 2.225538393                 |                        | 2.157310124            | 1.335863208              |                |
| 1.401170826               | 0.776119245                 |                        |                        |                          |                |
| ENSG00000163931           | 6780.122457                 |                        | 6006.199545            | 6718.444866              |                |
| 7660.482699               | 9412.053689                 |                        | 8250.401683            | 6501.588956              |                |
| 8440.979357               | -0.376567387                |                        | 0.00145485             | 0.053422088              | TKT            |
| 3                         | 53224707                    |                        | 53256052               | - 9507                   |                |
| protein_coding            | transketolase               | [Source:HGNC           | Symbol;Acc:HGNC:11834] |                          |                |
| -                         | 7049 6903                   |                        | 7221 6951              | 7765 8937                |                |
| 35.84967585               | 31.64120228                 |                        | 35.45682851            | 40.62710142              |                |
| 50.20480983               | 43.70984658                 |                        |                        |                          |                |
| ENSG00000213018           | 15.3896949                  |                        | 23.49230591            | 8.373632987              | 0              |
| 0                         | 0                           | 15.75187793            | 0                      | 6.319804564              |                |
| 0.001502493               | 1                           | AL590762.1             | X                      | 71420083                 |                |
| 71420514                  | -                           | 432                    | processed_pseudogene   | "pseudogene              |                |
| similar to part           | of poly(A) binding protein, | nuclear 1 (PABPN1)"    | -                      |                          |                |
| 16                        | 27                          | 9                      | 0                      | 0                        | 1.790760277    |
| 2.72357046                | 0.972534012                 |                        | 0                      | 0                        |                |
| ENSG00000144893           | 22.12268641                 |                        | 21.75213511            | 4.652018326              | 0              |
| 0                         | 0                           | 16.17561328            | 0                      | 6.357751758              |                |

|                                                                                         |              |                                |                |                               |                  |                                                          |        |
|-----------------------------------------------------------------------------------------|--------------|--------------------------------|----------------|-------------------------------|------------------|----------------------------------------------------------|--------|
| 0.001520807                                                                             | 1            | MED12L                         | 3              | 151085697                     | 151437072        |                                                          |        |
|                                                                                         | +            | 12619                          | protein_coding | mediator complex              | subunit 12       |                                                          |        |
| like [Source:HGNC Symbol;Acc:HGNC:16050]                                                |              |                                |                | -                             | 23               | 25                                                       |        |
|                                                                                         | 5            | 0                              | 0              | 0                             | 0.088126011      | 0.086332371                                              |        |
|                                                                                         | 0.018496566  | 0                              | 0              | 0                             |                  |                                                          |        |
| ENSG00000166682                                                                         | 15.3896949   |                                | 28.71281834    |                               | 4.652018326      | 0                                                        |        |
|                                                                                         | 0            | 0                              | 16.25151052    | 0                             | 6.36509284       |                                                          |        |
| 0.001543171                                                                             | 1            | TMPRSS5                        | 11             | 113687546                     | 113706373        |                                                          |        |
|                                                                                         | -            | 2666                           | protein_coding | transmembrane serine protease |                  |                                                          |        |
| 5 [Source:HGNC Symbol;Acc:HGNC:14908]                                                   |              |                                |                | -                             | 16               | 33                                                       | 5      |
|                                                                                         | 0            | 0                              | 0              | 0.290175709                   | 0.539401801      |                                                          |        |
| 0.087549949                                                                             | 0            | 0                              | 0              |                               |                  |                                                          |        |
| ENSG00000105568                                                                         | 8283.503277  |                                | 8460.710471    |                               | 8707.647903      |                                                          |        |
| 9822.742382                                                                             | 10798.71041  |                                | 11523.97496    |                               | 8483.953884      |                                                          |        |
| 10715.14258                                                                             | -0.336908133 |                                | 0.001543715    |                               | 0.055421692      |                                                          |        |
| PPP2R1A                                                                                 | 19           | 52190039                       | 52229533       | +                             | 7437             |                                                          |        |
| protein_coding                                                                          |              | protein phosphatase 2 scaffold | subunit Aalpha |                               |                  |                                                          |        |
| [Source:HGNC Symbol;Acc:HGNC:9302]                                                      |              |                                |                | -                             | 8612             | 9724                                                     | 9359   |
|                                                                                         | 8913         | 8909                           | 12483          | 55.98961177                   | 56.9778118       |                                                          |        |
| 58.74591893                                                                             | 66.59447028  |                                | 73.63402449    |                               | 78.04627991      |                                                          |        |
| ENSG00000269486                                                                         | 58.67321179  |                                | 68.73674694    |                               | 42.7985686       |                                                          |        |
| 8.816553243                                                                             | 15.75746271  |                                | 8.308561615    |                               | 56.73617577      |                                                          |        |
| 10.96085919                                                                             | 2.381147924  |                                | 0.001556123    |                               | 1                | ERVK9-11                                                 |        |
|                                                                                         | 19           | 38935297                       | 38938632       | -                             | 3336             |                                                          |        |
| lincRNA "endogenous retrovirus group K9, member 11 [Source:HGNC Symbol;Acc:HGNC:51160]" |              |                                |                | -                             | 61               | 79                                                       | 46     |
|                                                                                         | 9            | 0.884107367                    | 1.031952356    |                               | 0.643691576      |                                                          | 8      |
| 0.133252691                                                                             | 0.239532623  |                                | 0.125443304    |                               |                  |                                                          | 13     |
| ENSG00000285103                                                                         | 15.3896949   |                                | 12.18119566    |                               | 18.6080733       | 0                                                        |        |
|                                                                                         | 0            | 0                              | 15.39298795    | 0                             | 6.285852777      |                                                          |        |
| 0.001565535                                                                             | 1            | AL451123.1                     | 9              |                               | 27529085         |                                                          |        |
| 27543902                                                                                | +            | 9804                           | antisense      |                               | novel transcript |                                                          |        |
|                                                                                         | -            | 16                             | 14             | 20                            | 0                | 0                                                        |        |
| 0.07890743                                                                              | 0.06222764   |                                | 0.095229769    |                               | 0                | 0                                                        | 0      |
| ENSG00000110958                                                                         | 7287.982389  |                                | 6765.784103    |                               | 6158.34186       |                                                          |        |
| 8089.187601                                                                             | 9141.752598  |                                | 8657.521202    |                               | 6737.369451      |                                                          |        |
| 8629.487134                                                                             | -0.357071422 |                                | 0.001569678    |                               | 0.055421692      |                                                          | PTGES3 |
|                                                                                         | 12           | 56663341                       | 56688408       | -                             | 3399             |                                                          |        |
| protein_coding                                                                          |              | prostaglandin E synthase 3     |                |                               |                  |                                                          |        |
| [Source:HGNC Symbol;Acc:HGNC:16049]                                                     |              |                                |                | -                             | 7577             | 7776                                                     | 6619   |
|                                                                                         | 9378         | 107.7822733                    | 99.69277502    |                               | 90.9048914       |                                                          | 7340   |
| 119.9932839                                                                             | 136.390061   |                                | 128.2891956    |                               |                  |                                                          | 7542   |
| ENSG00000203880                                                                         | 1892.932472  |                                | 1596.606717    |                               | 1596.572689      |                                                          |        |
| 1310.360226                                                                             | 1183.021816  |                                | 1162.275453    |                               | 1695.370626      |                                                          |        |
| 1218.552498                                                                             | 0.476428937  |                                | 0.001577195    |                               | 1                | PCMTD2                                                   | 20     |
|                                                                                         | 64255695     | 64287821                       | +              | 5997                          |                  | protein_coding                                           |        |
|                                                                                         |              |                                |                |                               |                  | protein-L-isoaspartate (D-aspartate) O-methyltransferase |        |
| domain containing 2 [Source:HGNC Symbol;Acc:HGNC:15882]                                 |              |                                |                | -                             |                  |                                                          | 1968   |
|                                                                                         | 1835         | 1716                           | 1189           | 976                           | 1259             | 15.86690647                                              |        |
| 13.33400512                                                                             | 13.35762572  |                                | 11.01691121    |                               | 10.00375689      |                                                          |        |



|                                                  |                                                   |             |                      |                                |             |                |      |
|--------------------------------------------------|---------------------------------------------------|-------------|----------------------|--------------------------------|-------------|----------------|------|
| 9.761638025                                      |                                                   |             |                      |                                |             |                |      |
| ENSG00000106089                                  | 1642.84993                                        |             | 1474.79476           |                                | 1378.858232 |                |      |
| 829.858074                                       | 886.0542494                                       |             | 1261.978192          |                                | 1498.834307 |                |      |
| 992.6301718                                      | 0.593319299                                       |             | 0.001578049          |                                | 1           | STX1A 7        |      |
|                                                  | 73699206                                          | 73719672    | -                    |                                | 3693        | protein_coding |      |
|                                                  | syntaxin 1A [Source:HGNC Symbol;Acc:HGNC:11433]   |             |                      |                                |             | -              | 1708 |
|                                                  | 1695                                              | 1482        | 753                  | 731                            | 1367        | 22.36195531    |      |
| 20.00087486                                      | 18.73332777                                       |             | 11.32994267          |                                | 12.16705383 |                |      |
| 17.2115596                                       |                                                   |             |                      |                                |             |                |      |
| ENSG00000205534                                  | 185.6381947                                       |             | 275.8170731          |                                | 102.3444032 |                |      |
| 62.81794186                                      | 8.484787614                                       |             | 76.62340156          |                                | 187.9332237 |                |      |
| 49.30871034                                      | 1.923915847                                       |             | 0.001593696          |                                | 1           | SMG1P2 16      |      |
|                                                  | 29527568                                          | 29594966    | -                    |                                | 4221        |                |      |
| unprocessed_pseudogene                           | SMG1 pseudogene 2 [Source:HGNC                    |             |                      |                                |             |                |      |
| Symbol;Acc:HGNC:49859]                           | -                                                 | 193         | 317                  | 110                            | 57          | 7              |      |
|                                                  | 83                                                | 2.210768018 | 3.272672204          | 1.216531528                    |             |                |      |
| 0.750363235                                      | 0.101936577                                       |             | 0.914310608          |                                |             |                |      |
| ENSG00000257954                                  | 30.77938979                                       |             | 7.830768638          |                                | 9.304036652 | 0              |      |
|                                                  | 0                                                 | 15.97139836 | 0                    | 6.338348174                    |             |                |      |
| 0.001611042                                      | 1                                                 | AC125611.2  | 12                   | 49389516                       |             |                |      |
| 49390162                                         | +                                                 | 647         | processed_pseudogene | FGFR1 oncogene                 |             |                |      |
| partner 2 (FGFR10P2)                             | pseudogene                                        | -           | 32                   | 9                              | 10          | 0              |      |
|                                                  | 0                                                 | 2.391370757 | 0.606173333          | 0.721509004                    |             |                |      |
|                                                  | 0                                                 | 0           |                      |                                |             |                |      |
| ENSG00000080854                                  | 180.828915                                        |             | 92.22905285          |                                | 144.2125681 |                |      |
| 41.87862791                                      | 53.33295072                                       |             | 54.46723725          |                                | 139.0901787 |                |      |
| 49.89293862                                      | 1.477895335                                       |             | 0.001629871          |                                | 1           | IGSF9B 11      |      |
|                                                  | 133908564                                         | 133956985   | -                    |                                | 5753        | protein_coding |      |
|                                                  | immunoglobulin superfamily member 9B [Source:HGNC |             |                      |                                |             |                |      |
| Symbol;Acc:HGNC:32326]                           | -                                                 | 188         | 106                  | 155                            | 38          | 44             |      |
|                                                  | 59                                                | 1.580027667 | 0.802915957          | 1.257718242                    |             |                |      |
| 0.367029749                                      | 0.470116682                                       |             | 0.476857542          |                                |             |                |      |
| ENSG00000173915                                  | 612.702228                                        |             | 1185.926406          |                                | 1093.224307 |                |      |
| 1552.81544                                       | 1447.262344                                       |             | 1643.248853          |                                | 963.9509802 |                |      |
| 1547.775546                                      | -0.682960738                                      |             | 0.001645194          |                                | 1           | ATP5MD 10      |      |
|                                                  | 103389041                                         | 103396492   | -                    |                                | 924         | protein_coding |      |
|                                                  | ATP synthase membrane subunit DAPIT [Source:HGNC  |             |                      |                                |             |                |      |
| Symbol;Acc:HGNC:30889]                           | -                                                 | 637         | 1363                 | 1175                           | 1409        | 1194           |      |
|                                                  | 1780                                              | 33.33256062 | 64.28097899          | 59.36246564                    |             |                |      |
| 84.73270393                                      | 79.42911356                                       |             | 89.57339791          |                                |             |                |      |
| ENSG00000204396                                  | 8.656703379                                       |             | 20.8820497           |                                | 16.74726597 | 0              |      |
|                                                  | 0                                                 | 15.42867302 | 0                    | 6.289975925                    |             |                |      |
| 0.001650499                                      | 1                                                 | VWA7        | 6                    | 31765590                       | 31777294    |                |      |
|                                                  | -                                                 | 3638        | protein_coding       | von Willebrand factor A domain |             |                |      |
| containing 7 [Source:HGNC Symbol;Acc:HGNC:13939] | -                                                 |             |                      |                                |             | 9              |      |
|                                                  | 24                                                | 18          | 0                    | 0                              | 0           | 0.119613729    |      |
| 0.287479675                                      | 0.230970145                                       |             | 0                    | 0                              | 0           |                |      |
| ENSG00000139318                                  | 1675.553032                                       |             | 2488.444256          |                                | 2164.118925 |                |      |
| 1350.034715                                      | 1311.505743                                       |             | 1663.55867           |                                | 2109.372071 |                |      |
| 1441.699709                                      | 0.548657119                                       |             | 0.001653209          |                                | 1           | DUSP6 12       |      |

|                                                                       |              |                |                          |                        |
|-----------------------------------------------------------------------|--------------|----------------|--------------------------|------------------------|
| 89347232                                                              | 89353271     | -              | 4632                     | protein_coding         |
| dual specificity phosphatase 6 [Source:HGNC                           |              |                |                          |                        |
| Symbol;Acc:HGNC:3072]                                                 | -            | 1742           | 2860                     | 2326 1225 1082         |
| 1802                                                                  | 18.18363966  | 26.9064301     | 23.441597                |                        |
| 14.69533807                                                           | 14.35840074  | 18.08911226    |                          |                        |
| ENSG00000243709                                                       | 7.694847448  | 14.79145187    | 24.19049529              | 0                      |
| 0                                                                     | 0            | 15.55893154    | 0                        | 6.301738806            |
| 0.001656571                                                           | 1            | LEFTY1         | 1                        | 225886282 225911382    |
| -                                                                     | 1891         | protein_coding | left-right determination |                        |
| factor 1 [Source:HGNC Symbol;Acc:HGNC:6552]                           |              |                |                          |                        |
| 26                                                                    | 0            | 0              | 0                        | 0.20455009 0.391756301 |
| 0.64184159                                                            | 0            | 0              | 0                        |                        |
| ENSG00000279494                                                       | 29.81753386  | 11.31111026    | 6.512825656              | 0                      |
| 0                                                                     | 0            | 15.88048992    | 0                        | 6.330345457            |
| 0.001666087                                                           | 1            | AL117328.2     | 22                       | 49851425               |
| 49853364                                                              | +            | 1940           | lincRNA novel transcript | -                      |
| 31                                                                    | 13           | 7              | 0                        | 0 0.772611522          |
| 0.292011678                                                           | 0.16843888   | 0              | 0                        | 0                      |
| ENSG00000150995                                                       | 6262.643966  | 7201.696891    | 7512.079193              |                        |
| 6169.383132                                                           | 4667.8453    | 4734.033773    | 6992.140017              |                        |
| 5190.420735                                                           | 0.429940695  | 0.001675591    | 0.057177438              | ITPR1                  |
| 3                                                                     | 4493345      | 4847840        | +                        | 32454                  |
| protein_coding "inositol 1,4,5-trisphosphate receptor type 1          |              |                |                          |                        |
| [Source:HGNC Symbol;Acc:HGNC:6180]"                                   |              |                |                          |                        |
| 5598                                                                  | 3851         | 5128           | 9.700199806              | 6511 8277 8074         |
| 11.61359158                                                           | 9.584659875  | 7.293779787    | 7.347012907              |                        |
| ENSG00000225224                                                       | 9.618559309  | 34.80341617    | 4.652018326              | 0                      |
| 0                                                                     | 0            | 16.35799794    | 0                        | 6.374976407            |
| 0.001677035                                                           | 1            | RPS27AP12      | 7                        | 157192368              |
| 157192832                                                             | +            | 465            | processed_pseudogene     | ribosomal              |
| protein S27a pseudogene 12 [Source:HGNC Symbol;Acc:HGNC:35732]        |              |                |                          |                        |
| 10                                                                    | 40           | 5              | 0                        | 0 1.03979629           |
| 3.748570095                                                           | 0.501953038  | 0              | 0                        | 0                      |
| ENSG00000052802                                                       | 1016.681719  | 1386.916134    | 1076.477041              |                        |
| 1806.291346                                                           | 1940.592139  | 1407.839607    | 1160.024965              |                        |
| 1718.24103                                                            | -0.565939444 | 0.001679436    | 1                        | MSM01 4                |
| 165327623                                                             | 165343160    | +              | 2892                     | protein_coding         |
| methylsterol monooxygenase 1 [Source:HGNC                             |              |                |                          |                        |
| Symbol;Acc:HGNC:10545]                                                |              |                |                          |                        |
| 1525                                                                  | 17.67168311  | 1057           | 1594                     | 1157 1639 1601         |
| 31.49145368                                                           | 34.02831179  | 24.0186518     | 18.67588135              |                        |
| ENSG00000198886                                                       | 67986.86277  | 67154.93167    | 75476.20613              |                        |
| 78382.46454                                                           | 93765.38792  | 95356.43848    | 70206.00019              |                        |
| 89168.09698                                                           | -0.344938854 | 0.001681689    | 0.057177438              | MT-ND4                 |
| MT                                                                    | 10760        | 12137          | +                        | 1378                   |
| mitochondrially encoded NADH:ubiquinone oxidoreductase core subunit 4 |              |                |                          |                        |
| [Source:HGNC Symbol;Acc:HGNC:7459]                                    |              |                |                          |                        |
| 71123                                                                 | 77357        | 103292         | 2480.087326              | 70683 77182 81122      |
| 2748.118575                                                           | 2867.958701  | 3450.624977    | 3485.366777              |                        |
| ENSG00000180610                                                       | 28.85567793  | 7.830768638    | 10.23444032              | 0                      |

|                                         |              |                |                                                        |                  |                |             |
|-----------------------------------------|--------------|----------------|--------------------------------------------------------|------------------|----------------|-------------|
| 0                                       | 0            | 15.64029563    | 0                                                      | 6.308163906      |                |             |
| 0.001745183                             | 1            | ZBTB12BP       | 4                                                      | 39770081         |                |             |
| 39771371                                | -            | 1122           | processed_pseudogene                                   | "zinc finger     |                |             |
|                                         |              |                | and BTB domain containing 12B, pseudogene [Source:HGNC |                  |                |             |
| Symbol;Acc:HGNC:37702]"                 | -            | 30             | 9                                                      | 11               | 0              | 0           |
| 0                                       | 1.292794853  | 0.34954915     | 0.457663064                                            | 0                |                |             |
| 0                                       | 0            |                |                                                        |                  |                |             |
| ENSG00000272129                         | 48.09279655  | 6.960683234    | 8.373632987                                            |                  |                |             |
| 1.102069155                             | 0            | 0              | 21.14237092                                            | 0.367356385      |                |             |
| 5.780896479                             | 0.001749913  | 1              | AL359715.3                                             | 6                |                |             |
| 80355424                                | 80356859     | +              | 1436                                                   | lincRNA novel    |                |             |
| transcript                              | -            | 50             | 8                                                      | 9                | 1              | 0           |
| 1.683514188                             | 0.242769512  | 0.292572906    | 0.038695245                                            |                  |                |             |
| 0                                       | 0            |                |                                                        |                  |                |             |
| ENSG00000243243                         | 13.46598303  | 13.05128106    | 18.6080733                                             | 0                |                |             |
| 0                                       | 0            | 15.04177913    | 0                                                      | 6.252685675      |                |             |
| 0.001789024                             | 1            | AC073130.2     | 7                                                      | 116237929        |                |             |
| 116327896                               | -            | 917            | antisense                                              | novel transcript |                |             |
| -                                       | 14           | 15             | 20                                                     | 0                | 0              |             |
| 0.738175992                             | 0.712821058  | 1.018138115    | 0                                                      | 0                | 0              |             |
| ENSG00000150637                         | 23.08454234  | 9.570939447    | 13.02565131                                            | 0                |                |             |
| 0                                       | 0            | 15.22704437    | 0                                                      | 6.269793633      |                |             |
| 0.001792257                             | 1            | CD226          | 18                                                     | 69831158         | 69961803       |             |
| -                                       | 13638        | protein_coding | CD226 molecule [Source:HGNC                            |                  |                |             |
| Symbol;Acc:HGNC:16961]"                 | -            | 24             | 11                                                     | 14               | 0              | 0           |
| 0                                       | 0.085086718  | 0.035147998    | 0.047920726                                            | 0                |                |             |
| 0                                       | 0            |                |                                                        |                  |                |             |
| ENSG00000212127                         | 63.48249144  | 31.32307455    | 71.64108222                                            |                  |                |             |
| 6.612414933                             | 10.90901265  | 12.92442918    | 55.48221607                                            |                  |                |             |
| 10.14861892                             | 2.445984373  | 0.001820118    | 1                                                      | TAS2R14          | 12             |             |
| 10937406                                | 11171573     | -              | 2350                                                   | protein_coding   |                |             |
| taste 2 receptor member 14 [Source:HGNC |              |                | Symbol;Acc:HGNC:14920]"                                |                  |                |             |
| -                                       | 66           | 36             | 77                                                     | 6                | 9              | 14          |
| 1.357929708                             | 0.667564504  | 1.529568386    | 0.141871589                                            |                  |                |             |
| 0.235408428                             | 0.277007286  |                |                                                        |                  |                |             |
| ENSG00000275993                         | 1012.834295  | 1099.787951    | 852.2497573                                            |                  |                |             |
| 504.7476732                             | 584.2382329  | 787.4670064    | 988.2906679                                            |                  |                |             |
| 625.4843041                             | 0.65878515   | 0.00182434     | 1                                                      | SIK1B            | 21             |             |
| 6111134                                 | 6123739      | +              | 4806                                                   | protein_coding   | salt inducible |             |
| kinase 1B (putative) [Source:HGNC       |              |                | Symbol;Acc:HGNC:52389]"                                |                  |                |             |
| 1053                                    | 1264         | 916            | 458                                                    | 482              | 853            | 10.5936549  |
| 11.46098397                             | 8.897289934  | 5.295338841    | 6.164681335                                            |                  |                |             |
| 8.252704272                             |              |                |                                                        |                  |                |             |
| ENSG00000150991                         | 16905.57984  | 16569.03635    | 15936.88438                                            |                  |                |             |
| 17682.6996                              | 23748.92053  | 22988.86681    | 16470.50019                                            |                  |                |             |
| 21473.49565                             | -0.382676073 | 0.001842221    | 0.060811209                                            | UBC              |                |             |
| 12                                      | 124911604    | 124917368      | -                                                      | 3898             |                |             |
| protein_coding ubiquitin C [Source:HGNC |              |                | Symbol;Acc:HGNC:12468]"                                |                  |                |             |
| 17576                                   | 19043        | 17129          | 16045                                                  | 19593            | 24902          | 218.0115113 |
| 212.8884649                             | 205.1333207  | 228.7230482    | 308.9629932                                            |                  |                |             |

297.0457972

|                                                                  |              |                |                            |                        |
|------------------------------------------------------------------|--------------|----------------|----------------------------|------------------------|
| ENSG00000181856                                                  | 14.42783896  | 18.27179349    | 12.09524765                | 0                      |
| 0                                                                | 0            | 14.9316267     | 0                          | 6.242402668            |
| 0.001869267                                                      | 1            | SLC2A4         | 17                         | 7281667 7288257 + 4046 |
| protein_coding solute carrier family 2 member 4 [Source:HGNC     |              |                |                            |                        |
| Symbol;Acc:HGNC:11009]                                           | -            | 15             | 21                         | 13 0 0                 |
| 0                                                                | 0.179253068  | 0.226178862    | 0.149990416                | 0                      |
| 0                                                                | 0            |                |                            |                        |
| ENSG00000276180                                                  | 130.8124066  | 135.7333231    | 88.38834819                |                        |
| 286.5379804                                                      | 233.9377156  | 219.715296     | 118.3113593                |                        |
| 246.7303307                                                      | -1.059745922 | 0.001878953    | 1                          | HIST1H4I               |
| 6                                                                | 27138588     | 27139881       | +                          | 1294                   |
| protein_coding histone cluster 1 H4 family member i [Source:HGNC |              |                |                            |                        |
| Symbol;Acc:HGNC:4793]                                            | -            | 136            | 156                        | 95 260 193             |
| 238                                                              | 5.081662859  | 5.253502216    | 3.427167769                |                        |
| 11.16480431                                                      | 9.16791109   | 8.552118282    |                            |                        |
| ENSG00000213658                                                  | 10.58041524  | 13.05128106    | 21.3992843                 | 0                      |
| 0                                                                | 0            | 15.01032687    | 0                          | 6.249766697            |
| 0.001887724                                                      | 1            | LAT            | 16                         | 28984826 28990783      |
| +                                                                | 4430         | protein_coding | linker for activation of T |                        |
| cells [Source:HGNC Symbol;Acc:HGNC:18874]                        |              |                |                            |                        |
| 23                                                               | 0            | 0              | 0                          | 0.120057743 0.14755235 |
| 0.242365135                                                      | 0            | 0              | 0                          |                        |
| ENSG00000213442                                                  | 2457.541904  | 2352.710933    | 3037.767967                |                        |
| 2921.585331                                                      | 3947.850466  | 4223.518821    | 2616.006934                |                        |
| 3697.651539                                                      | -0.499410362 | 0.001899428    | 0.060811209                |                        |
| RPL18AP3                                                         | 12           | 104265309      | 104265836                  | + 528                  |
| processed_pseudogene ribosomal protein L18a pseudogene 3         |              |                |                            |                        |
| [Source:HGNC Symbol;Acc:HGNC:31387]                              |              |                |                            |                        |
| 2651                                                             | 3257         | 4575           | 233.9689351                | 223.1677128            |
| 288.6657771                                                      | 278.9894938  | 379.1675796    | 402.8915826                |                        |
| ENSG00000259974                                                  | 0            | 0              | 0.930403665                | 7.714484088            |
| 14.5453502                                                       | 32.31107295  | 0.310134555    |                            |                        |
| 18.19030241                                                      | -5.789057324 | 0.001912077    | 1                          | LINC00261              |
| 20                                                               | 22547671     | 22578642       | -                          | 5552                   |
| lincRNA long intergenic non-protein coding RNA 261 [Source:HGNC  |              |                |                            |                        |
| Symbol;Acc:HGNC:16189]                                           | -            | 0              | 0                          | 1 7 12                 |
| 35                                                               | 0            | 0              | 0.008408075                | 0.070058466            |
| 0.132855381                                                      | 0.293122803  |                |                            |                        |
| ENSG00000185989                                                  | 3727.191732  | 3834.466377    | 3773.717266                |                        |
| 2984.403273                                                      | 2838.767513  | 3058.473848    | 3778.458458                |                        |
| 2960.548211                                                      | 0.351769658  | 0.001918573    | 0.060811209                | RASA3                  |
| 13                                                               | 113977783    | 114132611      | -                          | 4763                   |
| protein_coding RAS p21 protein activator 3 [Source:HGNC          |              |                |                            |                        |
| Symbol;Acc:HGNC:20331]                                           | -            | 3875           | 4407                       | 4056 2708 2342         |
| 3313                                                             | 39.33619442  | 40.32005044    | 39.75240429                |                        |
| 31.59221833                                                      | 30.22412032  | 32.34237233    |                            |                        |
| ENSG00000103018                                                  | 3035.617318  | 3056.610025    | 2660.954482                |                        |
| 3786.709618                                                      | 4088.455517  | 3562.526586    | 2917.727275                |                        |
| 3812.563907                                                      | -0.385669345 | 0.001921051    | 0.060811209                | CYB5B                  |

|                                                             |                                                  |               |               |                    |      |   |
|-------------------------------------------------------------|--------------------------------------------------|---------------|---------------|--------------------|------|---|
| 16                                                          | 69424525                                         | 69466266      | +             | 6903               |      |   |
| protein_coding                                              | cytochrome b5 type B [Source:HGNC                |               |               |                    |      |   |
| Symbol;Acc:HGNC:24374]                                      | -                                                | 3156 3513     | 2860          | 3436               | 3373 |   |
| 3859                                                        | 22.10549975                                      | 22.17679971   | 19.34078938   |                    |      |   |
| 27.65841734                                                 | 30.03487494                                      | 25.99368929   |               |                    |      |   |
| ENSG00000226419                                             | 413.5980503                                      | 415.9008232   | 508.0004012   |                    |      |   |
| 224.8221077                                                 | 259.3920785                                      | 295.4155241   | 445.8330916   |                    |      |   |
| 259.8765701                                                 | 0.777638813                                      | 0.001927318   | 1             | SLC16A1-AS1        |      |   |
| 1                                                           | 112956415                                        | 113047055     | +             | 10138              |      |   |
| antisense                                                   | SLC16A1 antisense RNA 1 [Source:HGNC             |               |               |                    |      |   |
| Symbol;Acc:HGNC:49445]                                      | -                                                | 430 478       | 546           | 204                | 214  |   |
| 320                                                         | 2.050772028                                      | 2.054632755   | 2.51412225    |                    |      |   |
| 1.118123883                                                 | 1.297504422                                      | 1.467670988   |               |                    |      |   |
| ENSG00000197702                                             | 2240.162463                                      | 2256.131453   | 2102.712283   |                    |      |   |
| 3188.286067                                                 | 2841.191738                                      | 2675.35684    | 2199.668733   |                    |      |   |
| 2901.611548                                                 | -0.399388501                                     | 0.001979733   | 0.061606617   | PARVA              |      |   |
| 11                                                          | 12377185                                         | 12535356      | +             | 12849              |      |   |
| protein_coding                                              | parvin alpha [Source:HGNC Symbol;Acc:HGNC:14652] |               |               |                    |      |   |
| -                                                           | 2329 2593                                        | 2260 2893     | 2344          | 2898               |      |   |
| 8.763979962                                                 | 8.794107808                                      | 8.210793803   | 12.51097477   |                    |      |   |
| 11.21335673                                                 | 10.48721255                                      |               |               |                    |      |   |
| ENSG00000126091                                             | 187.5619065                                      | 187.9384473   | 174.9158891   |                    |      |   |
| 84.85932497                                                 | 79.99942608                                      | 87.70148371   | 183.472081    |                    |      |   |
| 84.18674492                                                 | 1.12317073                                       | 0.002000341   | 1             | ST3GAL3 1          |      |   |
| 43705824                                                    | 43931165                                         | +             | 19475         | protein_coding     |      |   |
| "ST3 beta-galactoside alpha-2,3-sialyltransferase 3         |                                                  |               |               |                    |      |   |
| [Source:HGNC Symbol;Acc:HGNC:10866]"                        | -                                                |               | 195           | 216                | 188  |   |
| 77                                                          | 66 95                                            | 0.484125949   | 0.483320129   |                    |      |   |
| 0.450636556                                                 | 0.219697595                                      | 0.20831178    | 0.226817812   |                    |      |   |
| ENSG00000198804                                             | 159805.6299                                      | 146103.0009   | 144089.7548   |                    |      |   |
| 153933.7134                                                 | 219105.0948                                      | 230517.3493   | 149999.4619   |                    |      |   |
| 201185.3858                                                 | -0.423572067                                     | 0.002014645   | 0.06164813    | MT-C01             |      |   |
| MT                                                          | 5904 7445                                        | +             | 1542          | protein_coding     |      |   |
| mitochondrially encoded cytochrome c oxidase I [Source:HGNC |                                                  |               |               |                    |      |   |
| Symbol;Acc:HGNC:7419]                                       | -                                                | 166143 167918 | 154868 139677 | 180763             |      |   |
| 249701                                                      | 5209.534169                                      | 4745.38526    | 4688.385908   |                    |      |   |
| 5033.297127                                                 | 7205.639441                                      | 7529.513669   |               |                    |      |   |
| ENSG00000085733                                             | 4819.86007                                       | 4436.565476   | 5086.516838   |                    |      |   |
| 3978.469651                                                 | 3389.066596                                      | 3713.927042   | 4780.980795   |                    |      |   |
| 3693.821096                                                 | 0.372024477                                      | 0.00204947    | 0.061685696   | CTTN               |      |   |
| 11                                                          | 70398404                                         | 70436584      | +             | 6949               |      |   |
| protein_coding                                              | cortactin [Source:HGNC Symbol;Acc:HGNC:3338]     |               |               |                    |      |   |
| 5011                                                        | 5099 5467                                        | 3610 2796     | 4023          | 34.86609487        |      |   |
| 31.9757911                                                  | 36.72592966                                      | 28.86668638   | 24.73216958   |                    |      |   |
| 26.91898863                                                 |                                                  |               |               |                    |      |   |
| ENSG00000270021                                             | 23.08454234                                      | 7.830768638   | 13.95605498   | 0                  |      |   |
| 0                                                           | 0                                                | 14.95712199   | 0             | 6.243878419        |      |   |
| 0.002050139                                                 | 1                                                | AC026691.1    | 5             | 135399280          |      |   |
| 135401296                                                   | +                                                | 2017          | antisense     | "novel transcript, |      |   |
| antisense to H2AFY"                                         | -                                                | 24            | 9             | 15                 | 0    | 0 |

|                                     |                                                             |             |                      |              |                |
|-------------------------------------|-------------------------------------------------------------|-------------|----------------------|--------------|----------------|
|                                     | 0                                                           | 0.575316143 | 0.194444297          | 0.347161372  | 0              |
|                                     | 0                                                           | 0           |                      |              |                |
| ENSG00000263624                     | 26.93196607                                                 |             | 13.05128106          | 31.63372462  | 0              |
|                                     | 2.424225033                                                 | 0           | 23.87232392          | 0.808075011  |                |
| 4.984904034                         | 0.002051574                                                 | 1           | AC055811.1           | 17           |                |
| 17167946                            | 17185554                                                    | -           | 1231                 | antisense    | novel          |
| transcript                          | -                                                           | 28          | 15                   | 34           | 0              |
|                                     | 1.099768294                                                 | 0.530996678 | 1.289338348          | 0            | 0              |
| 0.099866379                         | 0                                                           |             |                      |              |                |
| ENSG00000253522                     | 114.4608558                                                 |             | 200.9897284          | 159.0990267  |                |
| 78.24691003                         | 60.60562582                                                 |             | 26.77203187          | 158.1832036  |                |
| 55.20818924                         | 1.524055608                                                 |             | 0.002065293          | 1            | MIR3142HG      |
|                                     | 5                                                           | 160438594   | 160487426            | +            | 2377           |
| lincRNA MIR3142                     | host gene [Source:HGNC Symbol;Acc:HGNC:51944]               |             |                      |              | -              |
|                                     | 119                                                         | 231         | 171                  | 71           | 50             |
|                                     | 29                                                          | 2.420577523 |                      |              |                |
|                                     | 4.234882801                                                 | 3.358249544 | 1.659744395          | 1.29296921   |                |
|                                     | 0.567283085                                                 |             |                      |              |                |
| ENSG00000205609                     | 137.5453981                                                 |             | 53.07520966          | 80.94511887  |                |
| 1413.954726                         | 104.2416764                                                 |             | 673.9166643          | 90.52190889  |                |
| 730.7043557                         | -3.01334227                                                 |             | 0.002075185          | 1            | EIF3CL 16      |
|                                     | 28379579                                                    | 28403879    | -                    | 3091         | protein_coding |
|                                     | eukaryotic translation initiation factor 3 subunit C like   |             |                      |              |                |
| [Source:HGNC Symbol;Acc:HGNC:26347] | -                                                           |             | 143                  | 61           | 87             |
|                                     | 1283                                                        | 86          | 730                  | 2.236857144  | 0.859982132    |
| 1.313912013                         | 23.06426902                                                 |             | 1.710199623          | 10.98132824  |                |
| ENSG00000243423                     | 0                                                           | 0           | 0                    | 6.612414933  | 13.33323768    |
|                                     | 22.15616431                                                 | 0           | 14.03393897          | -6.375573989 |                |
| 0.00211976                          | 1                                                           | AC004223.1  | 17                   | 35076737     |                |
| 35077007                            | +                                                           | 271         | processed_pseudogene | ribosomal    |                |
| protein L37 (RPL37)                 | pseudogene                                                  | -           | 0                    | 0            | 0              |
|                                     | 11                                                          | 24          | 0                    | 0            | 1.230251783    |
| 2.495001175                         | 4.117873196                                                 |             |                      |              |                |
| ENSG00000141552                     | 1143.646702                                                 |             | 1310.348619          | 1224.411223  |                |
| 1502.120259                         | 1933.319464                                                 |             | 1691.253875          | 1226.135515  |                |
| 1708.897866                         | -0.478545625                                                |             | 0.002122059          | 1            | ANAPC11 17     |
|                                     | 81890790                                                    | 81900991    | +                    | 4027         | protein_coding |
|                                     | anaphase promoting complex subunit 11 [Source:HGNC          |             |                      |              |                |
| Symbol;Acc:HGNC:14452]              | -                                                           | 1189        | 1506                 | 1316         | 1363           |
|                                     | 1832                                                        | 14.27583243 | 16.29678515          | 15.25528394  | 1595           |
| 18.80729211                         | 24.34593275                                                 |             | 21.15314069          |              |                |
| ENSG00000186812                     | 714.6589567                                                 |             | 763.0648995          | 728.5060698  |                |
| 494.8290508                         | 526.0568321                                                 |             | 451.4318477          | 735.4099754  |                |
| 490.7725769                         | 0.58439813                                                  |             | 0.002128193          | 1            | ZNF397 18      |
|                                     | 35241030                                                    | 35267133    | +                    | 8710         | protein_coding |
|                                     | zinc finger protein 397 [Source:HGNC Symbol;Acc:HGNC:18818] |             |                      |              |                |
|                                     | zf-C2H2                                                     | 743         | 877                  | 783          | 449            |
|                                     | 434                                                         | 489         |                      |              |                |
| 4.124505388                         | 4.387731422                                                 |             | 4.19652334           | 2.864443297  |                |
| 3.062802089                         | 2.610488127                                                 |             |                      |              |                |
| ENSG00000167693                     | 8.656703379                                                 |             | 7.830768638          | 28.84251362  | 0              |
|                                     | 0                                                           | 0           | 15.10999521          | 0            | 6.259045242    |

|                                                                    |              |             |                      |        |             |                |        |
|--------------------------------------------------------------------|--------------|-------------|----------------------|--------|-------------|----------------|--------|
| 0.002170448                                                        | 1            | NXN         | 17                   | 799313 | 979770      | -              | 5880   |
| protein_coding nucleoredoxin [Source:HGNC                          |              |             |                      |        |             |                |        |
| Symbol;Acc:HGNC:18008]                                             | -            |             | 9                    | 9      | 31          | 0              | 0      |
| 0                                                                  | 0.074005909  |             | 0.066699685          |        | 0.246110648 |                | 0      |
| 0                                                                  | 0            |             |                      |        |             |                |        |
| ENSG0000042753                                                     | 4448.583681  |             | 4642.775717          |        | 4838.099059 |                |        |
| 5189.643653                                                        | 6105.410745  |             | 7155.517897          |        | 4643.152819 |                |        |
| 6150.190765                                                        | -0.4057009   |             | 0.002262018          |        | 0.066058804 |                | AP2S1  |
| 19                                                                 | 46838136     |             | 46850992             |        | -           | 1704           |        |
| protein_coding adaptor related protein complex 2 subunit sigma 1   |              |             |                      |        |             |                |        |
| [Source:HGNC Symbol;Acc:HGNC:565]                                  | -            |             |                      |        | 4625        | 5336           | 5200   |
| 4709                                                               | 5037         | 7751        | 131.2330925          |        | 136.4598307 |                |        |
| 142.4556862                                                        | 153.5575391  |             | 181.6978216          |        | 211.5042821 |                |        |
| ENSG00000188229                                                    | 9929.238775  |             | 8886.182234          |        | 11391.86248 |                |        |
| 10997.5481                                                         | 15364.73826  |             | 14215.02575          |        | 10069.0945  |                |        |
| 13525.7707                                                         | -0.425784822 |             | 0.002299861          |        | 0.066058804 |                | TUBB4B |
| 9                                                                  | 137241213    |             | 137243707            |        | +           | 2111           |        |
| protein_coding tubulin beta 4B class IVb [Source:HGNC              |              |             |                      |        |             |                |        |
| Symbol;Acc:HGNC:20771]                                             | -            |             | 10323                | 10213  | 12244       | 9979           | 12676  |
| 15398                                                              | 236.4388893  |             | 210.8257706          |        | 270.7578915 |                |        |
| 262.6702171                                                        | 369.0977157  |             | 339.1619317          |        |             |                |        |
| ENSG00000100075                                                    | 1901.589175  |             | 2124.748557          |        | 2756.78606  |                |        |
| 2806.970139                                                        | 3946.638353  |             | 2993.851702          |        | 2261.041264 |                |        |
| 3249.153398                                                        | -0.522799907 |             | 0.002311381          |        | 0.066058804 |                |        |
| SLC25A1 22                                                         | 19175575     |             | 19178830             |        | -           | 2096           |        |
| protein_coding solute carrier family 25 member 1 [Source:HGNC      |              |             |                      |        |             |                |        |
| Symbol;Acc:HGNC:10979]                                             | -            |             | 1977                 | 2442   | 2963        | 2547           | 3256   |
| 3243                                                               | 45.60543552  |             | 50.77067987          |        | 65.99125824 |                |        |
| 67.52268607                                                        | 95.48617092  |             | 71.94269266          |        |             |                |        |
| ENSG00000271383                                                    | 898.3734395  |             | 669.9657613          |        | 813.1728034 |                |        |
| 545.5242319                                                        | 378.1791051  |             | 562.2126693          |        | 793.8373347 |                |        |
| 495.3053354                                                        | 0.678953854  |             | 0.002321708          |        | 1           | NBPF19         | 1      |
| 149390623                                                          | 149556361    |             | +                    |        | 18785       | protein_coding |        |
| NBPF member 19 [Source:HGNC Symbol;Acc:HGNC:31999]                 |              |             |                      |        |             |                |        |
| 934                                                                | 770          | 874         | 495                  | 312    | 609         | 2.404013451    |        |
| 1.786233062                                                        | 2.171932225  |             | 1.464219017          |        | 1.02091775  |                |        |
| 1.507429852                                                        |              |             |                      |        |             |                |        |
| ENSG00000250651                                                    | 19.23711862  |             | 20.8820497           |        | 4.652018326 |                | 0      |
| 0                                                                  | 0            | 14.92372888 | 0                    |        | 6.241630595 |                |        |
| 0.002328454                                                        | 1            | PABPC1P7    | 4                    |        | 102896725   |                |        |
| 102898237                                                          | +            | 1513        | processed_pseudogene |        | poly(A)     |                |        |
| binding protein cytoplasmic 1 pseudogene 7 [Source:HGNC            |              |             |                      |        |             |                |        |
| Symbol;Acc:HGNC:37987]                                             | -            |             | 20                   | 24     | 5           | 0              | 0      |
| 0                                                                  | 0.639134534  |             | 0.691243263          |        | 0.154268449 |                | 0      |
| 0                                                                  | 0            |             |                      |        |             |                |        |
| ENSG00000143384                                                    | 19369.85474  |             | 24095.2751           |        | 20022.28687 |                |        |
| 15695.66891                                                        | 17058.05944  |             | 17185.79811          |        | 21162.47224 |                |        |
| 16646.50882                                                        | 0.346305783  |             | 0.002338683          |        | 0.066058804 |                | MCL1   |
| 1                                                                  | 150574551    |             | 150579738            |        | -           | 4371           |        |
| protein_coding "MCL1, BCL2 family apoptosis regulator [Source:HGNC |              |             |                      |        |             |                |        |

|                        |                                                 |                                  |                                  |              |                |             |       |
|------------------------|-------------------------------------------------|----------------------------------|----------------------------------|--------------|----------------|-------------|-------|
| Symbol;Acc:HGNC:6943]  | "                                               | -                                | 20138                            | 27693        | 21520          | 14242       | 14073 |
|                        | 18616                                           | 222.7597627                      | 276.0881693                      |              | 229.8304124    |             |       |
| 181.0515381            |                                                 | 197.9033936                      | 198.032551                       |              |                |             |       |
| ENSG00000223478        | 4.809279655                                     | 0                                | 2.791210996                      |              | 31.96000551    |             |       |
|                        | 21.81802529                                     | 39.69646105                      | 2.533496883                      |              | 31.15816395    |             |       |
|                        | -3.636102245                                    | 0.002427021                      | 1                                | AL441992.1   | 9              |             |       |
|                        | 128724445                                       | 128733194                        | +                                | 544          | antisense      |             |       |
|                        | uncharacterized                                 | LOC100506100                     | [Source:NCBI gene;Acc:100506100] |              |                |             |       |
|                        | -                                               | 5                                | 0                                | 3            | 29             | 18          | 43    |
| 0.444398231            | 0                                               | 0.257435474                      | 2.96217793                       |              | 2.033859581    |             |       |
|                        | 3.675365835                                     |                                  |                                  |              |                |             |       |
| ENSG00000187678        | 1094.592049                                     | 1095.437524                      | 1030.887261                      |              |                |             |       |
| 804.5104835            | 726.0553973                                     | 757.925454                       | 1073.638945                      |              |                |             |       |
| 762.8304449            | 0.49295583                                      | 0.002434175                      | 1                                | SPRY4        | 5              |             |       |
|                        | 142310427                                       | 142326455                        | -                                | 6565         | protein_coding |             |       |
|                        | sprouty RTK signaling antagonist 4 [Source:HGNC |                                  |                                  |              |                |             |       |
| Symbol;Acc:HGNC:15533] | -                                               | 1138                             | 1259                             | 1108         | 730            | 599         |       |
|                        | 821                                             | 8.381249092                      | 8.356984515                      | 7.878636538  |                |             |       |
| 6.178743596            | 5.608406089                                     | 5.814862434                      |                                  |              |                |             |       |
| ENSG00000238133        | 0                                               | 0                                | 0                                | 18.73517564  | 9.69690013     |             |       |
|                        | 12.00125567                                     | 0                                | 13.47777715                      | -6.31566883  |                |             |       |
| 0.002435435            | 1                                               | MAP3K20-AS1                      | 2                                | 173166446    |                |             |       |
| 173282036              | -                                               | 3049                             | antisense                        | MAP3K20      | antisense RNA  |             |       |
| 1 [Source:HGNC         | Symbol;Acc:HGNC:27935]                          | -                                | 0                                | 0            | 0              |             |       |
|                        | 17                                              | 8                                | 13                               | 0            | 0              | 0.309815785 |       |
|                        | 0.16127978                                      | 0.198251712                      |                                  |              |                |             |       |
| ENSG00000130164        | 2497.939853                                     | 2519.767331                      | 2513.0203                        |              |                |             |       |
| 4085.370359            | 3792.700064                                     | 2643.96894                       | 2510.242494                      |              |                |             |       |
| 3507.346454            | -0.482149777                                    | 0.002443818                      | 0.067982573                      | LDLR         |                |             |       |
|                        | 19                                              | 11089362                         | 11133816                         | +            | 7718           |             |       |
|                        | protein_coding                                  | low density lipoprotein receptor | [Source:HGNC                     |              |                |             |       |
| Symbol;Acc:HGNC:6547]  | -                                               | 2597                             | 2896                             | 2701         | 3707           | 3129        |       |
|                        | 2864                                            | 16.26928218                      | 16.35130355                      | 16.33675687  |                |             |       |
| 26.68884967            | 24.92000638                                     | 17.25437599                      |                                  |              |                |             |       |
| ENSG00000131389        | 2049.714989                                     | 1755.832346                      | 2230.177585                      |              |                |             |       |
| 1589.183722            | 1472.716707                                     | 1327.523511                      | 2011.908307                      |              |                |             |       |
| 1463.141314            | 0.459716197                                     | 0.002476125                      | 1                                | SLC6A6       | 3              |             |       |
|                        | 14402576                                        | 14489349                         | +                                | 8254         | protein_coding |             |       |
|                        | solute carrier family 6 member 6 [Source:HGNC   |                                  |                                  |              |                |             |       |
| Symbol;Acc:HGNC:11052] | -                                               | 2131                             | 2018                             | 2397         | 1442           | 1215        |       |
|                        | 1438                                            | 12.48303539                      | 10.65406385                      | 13.55656327  |                |             |       |
| 9.707621604            | 9.048137122                                     | 8.10075392                       |                                  |              |                |             |       |
| ENSG00000279349        | 0                                               | 0                                | 0                                | 13.22482987  | 15.75746271    |             |       |
|                        | 11.07808215                                     | 0                                | 13.35345824                      | -6.301281408 |                |             |       |
| 0.002484066            | 1                                               | AC092692.1                       | 3                                | 112525548    |                |             |       |
| 112528142              | -                                               | 2595                             | TEC                              | TEC          | -              | 0           | 0     |
|                        | 0                                               | 12                               | 13                               | 12           | 0              | 0           |       |
| 0.256954322            | 0.307930956                                     | 0.215018042                      |                                  |              |                |             |       |
| ENSG00000188517        | 0                                               | 0                                | 0                                | 8.816553243  | 6.060562582    |             |       |
|                        | 26.77203187                                     | 0                                | 13.88304923                      | -6.361767713 |                |             |       |



|                                                                |                      |                |                                  |                |                |       |
|----------------------------------------------------------------|----------------------|----------------|----------------------------------|----------------|----------------|-------|
| 0.002492198                                                    | 1                    | COL25A1        | 4                                | 108808725      | 109302752      |       |
| -                                                              | 8744                 | protein_coding | collagen                         | type XXV       | alpha          | 1     |
| chain [Source:HGNC Symbol;Acc:HGNC:18603]                      | -                    | 0              | 0                                |                |                | 0     |
| 0                                                              | 8                    | 5              | 29                               | 0              | 0              | 0     |
| 0.050838401                                                    | 0.035148534          |                | 0.154212248                      |                |                |       |
| ENSG00000164683                                                | 71.17733889          |                | 141.8239209                      |                | 106.0660178    |       |
| 177.433134                                                     | 317.5734793          |                | 226.1775106                      |                | 106.3557592    |       |
| 240.394708                                                     | -1.17440372          |                | 0.002498536                      | 1              | HEY1           | 8     |
| 79764010                                                       | 79767863             | -              | 3232                             | protein_coding |                |       |
| hes related family bHLH transcription factor with YRPW motif 1 |                      |                |                                  |                |                |       |
| [Source:HGNC Symbol;Acc:HGNC:4880]                             | bHLH                 | 74             | 163                              | 114            |                |       |
| 161                                                            | 262                  | 245            | 1.107035592                      | 2.197732599    |                |       |
| 1.646567485                                                    | 2.768003071          |                | 4.9828441                        | 3.524729151    |                |       |
| ENSG00000125740                                                | 95.22373716          |                | 56.55555128                      | 96.76198118    |                |       |
| 330.6207466                                                    | 229.0892656          |                | 97.85639235                      | 82.84708987    |                |       |
| 219.1888015                                                    | -1.403021525         |                | 0.002521747                      | 1              | FOSB           | 19    |
| 45467995                                                       | 45475179             | +              | 5553                             | protein_coding |                |       |
| "FosB proto-oncogene, AP-1 transcription factor subunit        |                      |                |                                  |                |                |       |
| [Source:HGNC Symbol;Acc:HGNC:3797]"                            | TF_bZIP              | 99             | 65                               | 104            |                |       |
| 300                                                            | 189                  | 106            | 0.862002921                      | 0.51008703     |                |       |
| 0.874282331                                                    | 3.001965003          |                | 2.09209543                       | 0.887583479    |                |       |
| ENSG00000197301                                                | 168.3247879          |                | 112.2410171                      | 133.0477241    |                |       |
| 57.30759608                                                    | 27.87858788          |                | 63.69897238                      | 137.8711764    |                |       |
| 49.62838545                                                    | 1.468341184          |                | 0.00253731                       | 1              | AC090673.1     |       |
| 12                                                             | 65851340             |                | 65882167                         | -              | 6033           |       |
| antisense                                                      | uncharacterized      | LOC100129940   | [Source:NCBI                     |                |                |       |
| gene;Acc:100129940]                                            | -                    | 175            | 129                              | 143            | 52             | 23    |
| 69                                                             | 1.402509914          |                | 0.931783429                      | 1.106493197    |                |       |
| 0.47894105                                                     | 0.234337542          |                | 0.531798103                      |                |                |       |
| ENSG00000215021                                                | 4449.545537          |                | 4636.685119                      | 4915.322563    |                |       |
| 5453.038181                                                    | 6282.379172          |                | 6012.629088                      | 4667.184406    |                |       |
| 5916.01548                                                     | -0.342027637         |                | 0.00257198                       | 0.070027852    |                | PHB2  |
| 12                                                             | 6965327              | 6970825        | -                                | 2499           | protein_coding |       |
| prohibitin 2 [Source:HGNC Symbol;Acc:HGNC:30306]               |                      |                |                                  |                |                | 4626  |
| 5329                                                           | 5283                 | 4948           | 5183                             | 6513           | 89.50361752    |       |
| 92.92617514                                                    | 98.68710076          |                | 110.0209723                      | 127.4859466    |                |       |
| 121.1841553                                                    |                      |                |                                  |                |                |       |
| ENSG00000168028                                                | 28232.39529          |                | 38204.58001                      | 34689.17025    |                |       |
| 42230.18797                                                    | 42683.33015          |                | 44757.29824                      | 33708.71518    |                |       |
| 43223.60545                                                    | -0.358687971         |                | 0.00264869                       | 0.070027852    |                | RPSA  |
| 3                                                              | 39406689             |                | 39412542                         | +              | 3936           |       |
| protein_coding                                                 | ribosomal protein SA | [Source:HGNC   |                                  |                |                |       |
| Symbol;Acc:HGNC:6502]                                          | -                    | 29352          | 43909                            | 37284          | 38319          | 35214 |
| 48482                                                          | 360.5652142          |                | 486.1351842                      | 442.1946108    |                |       |
| 540.967433                                                     | 549.9302763          |                | 572.7386026                      |                |                |       |
| ENSG00000244480                                                | 24.04639827          |                | 16.53162268                      | 3.721614661    |                | 0     |
| 0                                                              | 0                    | 14.76654521    | 0                                | 6.225927136    |                |       |
| 0.002656293                                                    | 1                    | AC005154.2     | 7                                | 30523143       |                |       |
| 30524535                                                       | -                    | 1393           | transcribed_processed_pseudogene |                |                |       |
| "pseudogene similar golgi autoantigen, golgin subfamily a, 8A  |                      |                |                                  |                |                |       |

|                                     |                                                            |              |             |                          |             |                |        |
|-------------------------------------|------------------------------------------------------------|--------------|-------------|--------------------------|-------------|----------------|--------|
| GOLGA8A"                            | -                                                          | 25           | 19          | 4                        | 0           | 0              | 0      |
|                                     | 0.867740982                                                | 0.59437575   |             | 0.134046325              |             | 0              | 0      |
|                                     | 0                                                          |              |             |                          |             |                |        |
| ENSG00000142546                     | 3763.742258                                                |              | 3418.565553 |                          | 4326.377043 |                |        |
|                                     | 3882.589635                                                | 6347.833248  | 6224.035823 |                          | 3836.228285 |                |        |
|                                     | 5484.819568                                                | -0.515819263 | 0.002661785 |                          | 0.070027852 |                | NOSIP  |
|                                     | 19                                                         | 49555711     | 49590262    |                          | -           | 4248           |        |
| protein_coding                      | nitric oxide synthase interacting protein [Source:HGNC     |              |             |                          |             |                |        |
| Symbol;Acc:HGNC:17946]              | -                                                          |              | 3913        | 3929                     | 4650        | 3523           | 5237   |
|                                     | 6742                                                       | 44.53757394  | 40.30473949 |                          | 51.09924468 |                |        |
|                                     | 46.08294004                                                | 75.77839909  | 73.79641394 |                          |             |                |        |
| ENSG00000267786                     | 24.04639827                                                |              | 6.960683234 |                          | 12.09524765 |                | 0      |
|                                     | 0                                                          | 0            | 14.36744305 | 0                        | 6.185751461 |                |        |
|                                     | 0.002662626                                                | 1            | AF038458.3  | 19                       | 35947115    |                |        |
|                                     | 35959192                                                   | +            | 500         | lincRNA novel transcript |             |                | -      |
|                                     | 25                                                         | 8            | 13          | 0                        | 0           | 2.417526375    |        |
|                                     | 0.697234038                                                |              | 1.213722446 | 0                        | 0           | 0              |        |
| ENSG00000277159                     | 23.08454234                                                |              | 17.40170808 |                          | 3.721614661 |                | 0      |
|                                     | 0                                                          | 0            | 14.73595503 | 0                        | 6.2230218   |                |        |
|                                     | 0.002669447                                                | 1            | AL139384.2  | 13                       | 112602828   |                |        |
|                                     | 112606417                                                  | -            | 3590        | lincRNA novel transcript |             |                | -      |
|                                     | 24                                                         | 20           | 4           | 0                        | 0           | 0.323234724    |        |
|                                     | 0.242769512                                                |              | 0.052012961 | 0                        | 0           | 0              |        |
| ENSG00000165288                     | 1221.557032                                                |              | 884.8768561 |                          | 971.3414265 |                |        |
|                                     | 768.1422013                                                | 481.208669   | 705.3045637 |                          | 1025.925105 |                |        |
|                                     | 651.5518113                                                | 0.653848125  | 0.002671729 |                          | 1           | BRWD3          | X      |
|                                     | 80670854                                                   | 80809688     | -           |                          | 12694       | protein_coding |        |
|                                     | bromodomain and WD repeat domain containing 3 [Source:HGNC |              |             |                          |             |                |        |
| Symbol;Acc:HGNC:17342]              | -                                                          |              | 1270        | 1017                     | 1044        | 697            | 397    |
|                                     | 764                                                        | 4.837338106  | 3.491250868 |                          | 3.839264565 |                |        |
|                                     | 3.051028945                                                | 1.922380591  | 2.798503683 |                          |             |                |        |
| ENSG00000105738                     | 3291.470996                                                |              | 2726.847657 |                          | 3368.991672 |                |        |
|                                     | 2471.941116                                                | 2067.863953  | 2465.796453 |                          | 3129.103441 |                |        |
|                                     | 2335.200507                                                | 0.421775936  | 0.002685025 |                          | 0.070027852 |                |        |
| SIPA1L3                             | 19                                                         | 37907228     | 38208372    |                          | +           | 10335          |        |
| protein_coding                      | signal induced proliferation associated 1 like 3           |              |             |                          |             |                |        |
| [Source:HGNC Symbol;Acc:HGNC:23801] | -                                                          |              |             |                          | 3422        | 3134           | 3621   |
|                                     | 2243                                                       | 1706         | 2671        | 16.00924094              | 13.21438966 |                |        |
|                                     | 16.35550958                                                | 12.05954261  | 10.14649174 |                          | 12.01695473 |                |        |
| ENSG00000116221                     | 2639.332675                                                |              | 2547.610064 |                          | 3048.932811 |                |        |
|                                     | 3412.006105                                                | 3484.823484  | 3857.018936 |                          | 2745.29185  |                |        |
|                                     | 3584.616175                                                | -0.385094052 | 0.002708049 |                          | 0.070027852 |                | MRPL37 |
|                                     | 1                                                          | 54184041     | 54225464    |                          | +           | 2549           |        |
| protein_coding                      | mitochondrial ribosomal protein L37 [Source:HGNC           |              |             |                          |             |                |        |
| Symbol;Acc:HGNC:14034]              | -                                                          |              | 2744        | 2928                     | 3277        | 3096           | 2875   |
|                                     | 4178                                                       | 52.0493713   | 50.05642561 |                          | 60.01400937 |                |        |
|                                     | 67.49057997                                                | 69.32906988  | 76.21309846 |                          |             |                |        |
| ENSG00000254941                     | 15.3896949                                                 |              | 23.49230591 |                          | 13.95605498 |                | 0      |
|                                     | 1.212112516                                                | 0            | 17.61268526 |                          | 0.404037505 |                |        |
|                                     | 5.519062685                                                | 0.00271859   | 1           | AP000866.4               |             | 11             |        |

|                            |                                                     |             |                |                      |                |             |
|----------------------------|-----------------------------------------------------|-------------|----------------|----------------------|----------------|-------------|
| 124807822                  | 124808269                                           | -           | 448            | processed_pseudogene |                |             |
|                            | ring finger protein 181 (RNF181)                    |             | pseudogene     | -                    | 16             |             |
|                            | 27                                                  | 15          | 0              | 1                    | 0              | 1.726804553 |
| 2.626300086                | 1.56300109                                          | 0           | 0.137204813    | 0                    |                |             |
| ENSG00000087494            | 7.694847448                                         | 60.9059783  | 69.78027489    |                      |                |             |
| 136.6565753                | 209.6954653                                         | 143.0918945 | 46.12703354    |                      |                |             |
| 163.1479784                | -1.820155256                                        | 0.002741598 | 1              | PTHLH                | 12             |             |
|                            | 27958084                                            | 27972705    | -              | 3377                 | protein_coding |             |
|                            | parathyroid hormone like hormone [Source:HGNC       |             |                |                      |                |             |
| Symbol;Acc:HGNC:9607]      | -                                                   | 8           | 70             | 75                   | 124            | 173         |
|                            | 155                                                 | 0.114540782 | 0.90328662     | 1.036755239          |                |             |
| 2.040340584                | 3.148925622                                         | 2.134182997 |                |                      |                |             |
| ENSG00000123384            | 1966.995379                                         | 1165.914442 | 1966.873348    |                      |                |             |
| 1363.259545                | 1031.507751                                         | 742.2315042 | 1699.927723    |                      |                |             |
| 1045.666267                | 0.70146355                                          | 0.002752434 | 1              | LRP1                 | 12             |             |
|                            | 57128493                                            | 57213351    | +              | 20839                | protein_coding |             |
|                            | LDL receptor related protein 1 [Source:HGNC         |             |                |                      |                |             |
| Symbol;Acc:HGNC:6692]      | -                                                   | 2045        | 1340           | 2114                 | 1237           | 851         |
|                            | 804                                                 | 4.744797194 | 2.802118655    | 4.735590538          |                |             |
| 3.298411748                | 2.510152145                                         | 1.793949412 |                |                      |                |             |
| ENSG00000280537            | 8.656703379                                         | 10.44102485 | 23.26009163    | 0                    |                |             |
|                            | 0                                                   | 14.11927329 | 0              | 6.161394968          |                |             |
| 0.002826539                | 1                                                   | AC068946.1  | 2              | 219075329            |                |             |
| 219170827                  | -                                                   | 4650        | protein_coding | "novel protein,      |                |             |
| SLC23A3-NHEJ1 readthrough" |                                                     | -           | 9              | 12                   | 25             | 0           |
|                            | 0                                                   | 0.093581666 | 0.112457103    | 0.250976519          |                |             |
|                            | 0                                                   | 0           |                |                      |                |             |
| ENSG00000161800            | 968.5889225                                         | 983.1965068 | 1096.945921    |                      |                |             |
| 1649.797526                | 1307.869405                                         | 1322.907644 | 1016.243784    |                      |                |             |
| 1426.858191                | -0.489538366                                        | 0.002861134 | 1              | RACGAP1              | 12             |             |
|                            | 49976923                                            | 50033136    | -              | 4487                 | protein_coding |             |
|                            | Rac GTPase activating protein 1 [Source:HGNC        |             |                |                      |                |             |
| Symbol;Acc:HGNC:9804]      | -                                                   | 1007        | 1130           | 1179                 | 1497           | 1079        |
|                            | 1433                                                | 10.85112128 | 10.9744047     | 12.26602291          |                |             |
| 18.53863588                | 14.78130353                                         | 14.84981827 |                |                      |                |             |
| ENSG00000130726            | 18206.00906                                         | 15830.33384 | 17044.99515    |                      |                |             |
| 17943.88999                | 23459.22564                                         | 25969.79409 | 17027.11268    |                      |                |             |
| 22457.63657                | -0.399424672                                        | 0.002861838 | 0.070591725    | TRIM28               |                |             |
|                            | 19                                                  | 58544091    | 58550722       | +                    | 4034           |             |
| protein_coding             | tripartite motif containing 28 [Source:HGNC         |             |                |                      |                |             |
| Symbol;Acc:HGNC:16384]     | -                                                   | 18928       | 18194          | 18320                | 16282          | 19354       |
|                            | 28131                                               | 226.8663323 | 196.539974     | 211.9998781          |                |             |
| 224.2765672                | 294.9050456                                         | 324.2502316 |                |                      |                |             |
| ENSG00000112514            | 2346.928472                                         | 2451.030584 | 2926.119527    |                      |                |             |
| 3446.170249                | 3362.40012                                          | 3305.884349 | 2574.692861    |                      |                |             |
| 3371.484906                | -0.38894851                                         | 0.002863642 | 0.070591725    | CUTA                 |                |             |
|                            | 6                                                   | 33416442    | 33418317       | -                    | 1876           |             |
| protein_coding             | cutA divalent cation tolerance homolog [Source:HGNC |             |                |                      |                |             |
| Symbol;Acc:HGNC:21101]     | -                                                   | 2440        | 2817           | 3145                 | 3127           | 2774        |
|                            | 3581                                                | 62.88661358 | 65.43537727    | 78.25892025          |                |             |

|                                                               |              |                      |                      |                |           |
|---------------------------------------------------------------|--------------|----------------------|----------------------|----------------|-----------|
| 92.62049354                                                   | 90.89102119  | 88.75697762          |                      |                |           |
| ENSG00000133119                                               | 1522.617939  | 1551.362276          | 1306.286746          |                |           |
| 1951.764474                                                   | 1909.077213  | 1994.054787          | 1460.088987          |                |           |
| 1951.632158                                                   | -0.418678103 | 0.002868106          | 1                    | RFC3           | 13        |
| 33818049                                                      | 33966558     | +                    | 2874                 | protein_coding |           |
| replication factor C subunit 3 [Source:HGNC                   |              |                      |                      |                |           |
| Symbol;Acc:HGNC:9971]                                         | -            | 1583                 | 1783                 | 1404           | 1771 1575 |
| 2160                                                          | 26.631484    | 27.034801            | 22.80480588          |                |           |
| 34.24079512                                                   | 33.68535701  | 34.94604288          |                      |                |           |
| ENSG00000214279                                               | 180.828915   | 194.8991306          | 225.157687           |                |           |
| 36.36828213                                                   | 86.05998866  | 116.3198626          | 200.2952442          |                |           |
| 79.58271113                                                   | 1.32857716   | 0.002870889          | 1                    | SCART1         | 10        |
| 133453928                                                     | 133523558    | +                    | 8015                 | protein_coding |           |
| scavenger receptor family member expressed on T cells 1       |              |                      |                      |                |           |
| [Source:HGNC Symbol;Acc:HGNC:32411]                           | -            | 188                  | 224                  | 242            |           |
| 33                                                            | 71           | 126                  | 1.134110938          | 1.217876048    |           |
| 1.409476616                                                   | 0.228782318  | 0.544505389          | 0.730967447          |                |           |
| ENSG00000214282                                               | 24.04639827  | 4.350427021          | 14.88645864          | 0              |           |
| 0                                                             | 0            | 14.42776131          | 0                    | 6.19165134     |           |
| 0.002878833                                                   | 1            | KRT8P14 X            | 45632292             | 45633733       |           |
| -                                                             | 1442         | processed_pseudogene | keratin 8 pseudogene |                |           |
| 14 [Source:HGNC Symbol;Acc:HGNC:33366]                        | -            | 25                   | 5                    | 16             |           |
| 0                                                             | 0            | 0                    | 0.838254638          | 0.151099609    |           |
| 0.51796541                                                    | 0            | 0                    | 0                    |                |           |
| ENSG00000112972                                               | 595.3888213  | 650.8238824          | 561.9638138          |                |           |
| 1239.8278                                                     | 1003.629164  | 661.9154086          | 602.7255058          |                |           |
| 968.4574573                                                   | -0.683276842 | 0.002883707          | 1                    | HMGCS1         | 5         |
| 43289395                                                      | 43313512     | -                    | 4702                 | protein_coding |           |
| 3-hydroxy-3-methylglutaryl-CoA synthase 1 [Source:HGNC        |              |                      |                      |                |           |
| Symbol;Acc:HGNC:5007]                                         | -            | 619                  | 748                  | 604            | 1125 828  |
| 717                                                           | 6.365158766  | 6.932303543          | 5.99653468           |                |           |
| 13.29480407                                                   | 10.82418166  | 7.090347964          |                      |                |           |
| ENSG00000165916                                               | 3852.233003  | 3829.245864          | 4203.563759          |                |           |
| 4618.77183                                                    | 5116.326931  | 5413.489479          | 3961.680876          |                |           |
| 5049.529413                                                   | -0.350160266 | 0.002888004          | 0.070591725          | PSMC3          |           |
| 11                                                            | 47418769     | 47426473             | -                    | 2276           |           |
| protein_coding "proteasome 26S subunit, ATPase 3 [Source:HGNC |              |                      |                      |                |           |
| Symbol;Acc:HGNC:9549]"                                        | -            | 4005                 | 4401                 | 4518           | 4191 4221 |
| 5864                                                          | 85.08078322  | 84.26315355          | 92.66591208          |                |           |
| 102.3192732                                                   | 113.996221   | 119.7988701          |                      |                |           |
| ENSG00000111911                                               | 1058.041524  | 1325.140071          | 960.1765825          |                |           |
| 806.7146218                                                   | 787.8731356  | 686.8410935          | 1114.452726          |                |           |
| 760.4762836                                                   | 0.552129069  | 0.002896931          | 1                    | HINT3          | 6         |
| 125956781                                                     | 125980244    | +                    | 3314                 | protein_coding |           |
| histidine triad nucleotide binding protein 3 [Source:HGNC     |              |                      |                      |                |           |
| Symbol;Acc:HGNC:18468]                                        | -            | 1100                 | 1523                 | 1032           | 732 650   |
| 744                                                           | 16.04875686  | 20.02654344          | 14.53694774          |                |           |
| 12.273562                                                     | 12.05613806  | 10.43882098          |                      |                |           |
| ENSG00000130635                                               | 2047.791277  | 1484.3657            | 1989.203036          |                |           |
| 1138.437438                                                   | 1576.958384  | 913.0186041          | 1840.453338          |                |           |

|                                                              |              |             |                      |                |             |             |
|--------------------------------------------------------------|--------------|-------------|----------------------|----------------|-------------|-------------|
| 1209.471475                                                  | 0.606571904  | 0.002913346 | 1                    | COL5A1         | 9           |             |
| 134641774                                                    | 134844843    | +           | 11189                | protein_coding |             |             |
| collagen type V alpha 1 chain [Source:HGNC                   |              |             |                      |                |             |             |
| Symbol;Acc:HGNC:2209]                                        | -            | 2129        | 1706                 | 2138           | 1033        | 1301        |
| 989                                                          | 9.199952903  | 6.6442559   |                      | 8.919950881    |             |             |
| 5.130044015                                                  | 7.147157998  | 4.109945244 |                      |                |             |             |
| ENSG00000122026                                              | 8042.077439  | 9985.100099 |                      | 14016.53122    |             |             |
| 15096.14329                                                  | 14368.38177  | 15098.5028  |                      | 10681.23625    |             |             |
| 14854.34262                                                  | -0.475808407 | 0.00291586  |                      | 0.070591725    |             | RPL21       |
| 13                                                           | 27251309     | 27256691    | +                    | 2249           |             |             |
| protein_coding ribosomal protein L21 [Source:HGNC            |              |             |                      |                |             |             |
| Symbol;Acc:HGNC:10313]                                       | -            | 8361        | 11476                | 15065          | 13698       | 11854       |
| 16355                                                        | 179.7504492  | 222.3615445 |                      | 312.6984413    |             |             |
| 338.4384911                                                  | 323.9834514  | 338.1365453 |                      |                |             |             |
| ENSG00000110921                                              | 353.9629826  | 527.271755  |                      | 458.6890069    |             |             |
| 721.8552968                                                  | 637.5711836  | 745.9241983 |                      | 446.6412482    |             |             |
| 701.7835596                                                  | -0.651797215 | 0.002924576 | 1                    | MVK            | 12          |             |
| 109573255                                                    | 109598117    | +           | 6480                 | protein_coding |             |             |
| mevalonate kinase [Source:HGNC Symbol;Acc:HGNC:7530]         |              |             |                      |                |             |             |
| 368                                                          | 606          | 493         | 655                  | 526            | 808         | 2.745832425 |
| 4.075268391                                                  | 3.551550131  | 5.616662622 |                      | 4.98951231     |             |             |
| 5.79785531                                                   |              |             |                      |                |             |             |
| ENSG00000172803                                              | 87.52888972  | 67.86666153 |                      | 63.26744923    |             |             |
| 7.714484088                                                  | 1.212112516  | 28.61837889 |                      | 72.88766683    |             |             |
| 12.51499183                                                  | 2.519373042  | 0.002942505 | 1                    | SNX32          | 11          |             |
| 65833641                                                     | 65856896     | +           | 3966                 | protein_coding |             |             |
| sorting nexin 32 [Source:HGNC Symbol;Acc:HGNC:26423]         |              |             |                      |                |             |             |
| 91                                                           | 78           | 68          | 7                    | 1              | 31          | 1.109404438 |
| 0.857038813                                                  | 0.800391078  | 0.098074787 |                      | 0.015498678    |             |             |
| 0.363446091                                                  |              |             |                      |                |             |             |
| ENSG00000202523                                              | 0            | 0           | 0                    | 25.34759057    | 25.45436284 |             |
| 0                                                            | 0            | 16.93398447 |                      | -6.642286666   | 0.002979652 |             |
| 1                                                            | RF00019      | 9           | 83992932             | 83993033       | +           |             |
| 102                                                          | misc_RNA     |             | -                    | 0              | 0           | 0           |
| 23                                                           | 21           | 0           | 0                    | 0              | 0           | 12.52967216 |
| 12.65512628                                                  | 0            |             |                      |                |             |             |
| ENSG00000249626                                              | 33.66495758  | 10.44102485 |                      | 1.86080733     | 0           |             |
| 0                                                            | 0            | 15.32226325 | 0                    | 6.278622403    |             |             |
| 0.00299332                                                   | 1            | AC024560.2  | 3                    | 197634315      |             |             |
| 197635811                                                    | +            | 1497        | processed_pseudogene | "protein       |             |             |
| phosphatase 4, regulatory subunit 2 (PPP4R2) pseudogene"     |              |             |                      |                |             |             |
| 35                                                           | 12           | 2           | 0                    | 0              | 0           | 1.130439855 |
| 0.34931565                                                   | 0.062366911  | 0           | 0                    | 0              | 0           |             |
| ENSG00000172531                                              | 3442.482377  | 3724.835616 |                      | 4276.135245    |             |             |
| 4572.484926                                                  | 5186.629457  | 5061.76037  |                      | 3814.484413    |             |             |
| 4940.291584                                                  | -0.373080938 | 0.003002231 |                      | 0.070591725    |             | PPP1CA      |
| 11                                                           | 67398183     | 67421183    | -                    | 2711           |             |             |
| protein_coding protein phosphatase 1 catalytic subunit alpha |              |             |                      |                |             |             |
| [Source:HGNC Symbol;Acc:HGNC:9281]                           | -            |             |                      | 3579           | 4281        | 4596        |
| 4149                                                         | 4279         | 5483        | 63.83125706          | 68.81360465    |             |             |

|                                    |                                                   |                      |                       |                    |                |
|------------------------------------|---------------------------------------------------|----------------------|-----------------------|--------------------|----------------|
| 79.14008972                        | 85.04053053                                       | 97.01974506          | 94.04154304           |                    |                |
| ENSG00000269997                    | 15.3896949                                        | 22.62222051          | 4.652018326           | 0                  |                |
| 0                                  | 0                                                 | 14.22131124          | 0                     | 6.172360792        |                |
| 0.003012657                        | 1                                                 | AC068790.3           | 12                    | 123966077          |                |
| 123966629                          | -                                                 | 553                  | sense_intronic        | "novel transcript, |                |
| sense intronic to CCDC92"          | -                                                 | 16                   | 26                    | 5                  | 0              |
| 0                                  | 0                                                 | 1.398930271          | 2.048834197           | 0.422076244        |                |
| 0                                  | 0                                                 | 0                    |                       |                    |                |
| ENSG00000231704                    | 20.19897455                                       | 3.480341617          | 19.53847697           | 0                  |                |
| 0                                  | 0                                                 | 14.40593105          | 0                     | 6.189550553        |                |
| 0.003026865                        | 1                                                 | AC004895.1           | 7                     | 6081103            | 6093085 +      |
| 820                                | lincRNA                                           | novel transcript     | -                     | 21                 | 4              |
| 21                                 | 0                                                 | 0                    | 0                     | 1.238245216        | 0.212571353    |
| 1.195505224                        | 0                                                 | 0                    | 0                     |                    |                |
| ENSG00000147162                    | 5193.060171                                       | 4467.888551          | 5041.857462           |                    |                |
| 3851.731698                        | 4155.121706                                       | 3058.473848          | 4900.935395           |                    |                |
| 3688.442417                        | 0.410411673                                       | 0.003071492          | 0.070591725           | OGT                |                |
| X                                  | 71533083                                          | 71575897             | +                     | 9812               |                |
| protein_coding                     | 0-linked N-acetylglucosamine (GlcNAc) transferase |                      |                       |                    |                |
| [Source:HGNC Symbol;Acc:HGNC:8127] | -                                                 | 5399                 | 5135                  | 5419               |                |
| 3495                               | 3428                                              | 3313                 | 26.60461658           | 22.80560018        |                |
| 25.78146829                        | 19.79254697                                       | 21.47487447          | 15.69982872           |                    |                |
| ENSG00000233328                    | 15.3896949                                        | 24.36239132          | 15.81686231           |                    |                |
| 54.00138862                        | 75.15097601                                       | 79.39292209          | 18.52298284           |                    |                |
| 69.51509557                        | -1.906419368                                      | 0.003083612          | 1                     | PFN1P1             | 1              |
| 171670517                          | 171670939                                         | -                    | 423                   |                    |                |
| processed_pseudogene               | profilin 1 pseudogene 1 [Source:HGNC              |                      |                       |                    |                |
| Symbol;Acc:HGNC:42989]             | -                                                 | 16                   | 28                    | 17                 | 49             |
| 86                                 | 1.82886156                                        | 2.884537981          | 1.87609398            |                    | 62             |
| 6.43676652                         | 9.009458358                                       | 9.453423236          |                       |                    |                |
| ENSG00000146701                    | 5675.911849                                       | 5015.17227           | 5139.549847           |                    |                |
| 6092.238291                        | 7252.069185                                       | 6774.247236          | 5276.877988           |                    |                |
| 6706.184904                        | -0.345805513                                      | 0.0030837            | 0.070591725           | MDH2               |                |
| 7                                  | 76048051                                          | 76067508             | +                     | 3641               |                |
| protein_coding                     | malate dehydrogenase 2 [Source:HGNC               |                      |                       |                    |                |
| Symbol;Acc:HGNC:6971]              | -                                                 | 5901                 | 5764                  | 5524               | 5528           |
| 7338                               | 78.36211555                                       | 68.98614723          | 70.82376771           |                    | 5983           |
| 84.36443437                        | 101.0056538                                       | 93.71045501          |                       |                    |                |
| ENSG00000198763                    | 101563.3296                                       | 89093.26505          | 89124.29749           |                    |                |
| 93244.96917                        | 139926.2689                                       | 143320.8415          | 93260.29738           |                    |                |
| 125497.3599                        | -0.428327357                                      | 0.003085536          | 0.070591725           | MT-ND2             |                |
| MT                                 | 4470                                              | 5511                 | +                     | 1042               | protein_coding |
| mitochondrially encoded            | NADH:ubiquinone oxidoreductase core subunit 2     |                      |                       |                    |                |
| [Source:HGNC Symbol;Acc:HGNC:7456] | -                                                 | 105591               | 102396                | 95791              |                |
| 84609                              | 115440                                            | 155248               | 4899.597455           | 4282.268265        |                |
| 4291.439793                        | 4511.914766                                       | 6809.825123          | 6927.703839           |                    |                |
| ENSG00000218428                    | 25.97011014                                       | 7.830768638          | 8.373632987           | 0                  |                |
| 0                                  | 0                                                 | 14.05817059          | 0                     | 6.154348036        |                |
| 0.003110509                        | 1                                                 | NIP7P3               | 6                     | 116137058          | 116137572      |
| -                                  | 515                                               | processed_pseudogene | "NIP7, nucleolar pre- |                    |                |

|                                                               |              |             |                             |                |             |      |
|---------------------------------------------------------------|--------------|-------------|-----------------------------|----------------|-------------|------|
| rRNA processing protein pseudogene 3 [Source:HGNC             |              |             |                             |                |             |      |
| Symbol;Acc:HGNC:45182]" -                                     | 27           | 9           | 9                           | 0              | 0           |      |
| 0                                                             | 2.534882024  | 0.761542031 | 0.81579552                  | 0              | 0           |      |
| 0                                                             | 0            |             |                             |                |             |      |
| ENSG00000151611                                               | 299.1371945  | 415.9008232 | 363.7878331                 |                |             |      |
| 234.7407301                                                   | 187.87744    | 186.4810496 | 359.6086169                 |                |             |      |
| 203.0330732                                                   | 0.825345454  | 0.003115536 | 1                           | MMAA           | 4           |      |
| 145599042                                                     | 145660035    | +           | 8882                        | protein_coding |             |      |
| methylmalonic aciduria (cobalamin deficiency) cblA type       |              |             |                             |                |             |      |
| [Source:HGNC Symbol;Acc:HGNC:18871]" -                        |              |             | 311                         | 478            | 391         |      |
| 213                                                           | 155          | 202         | 1.692976137                 | 2.345177536    |             |      |
| 2.055000938                                                   | 1.332541914  | 1.072675322 | 1.057478676                 |                |             |      |
| ENSG00000283360                                               | 6.732991517  | 8.700854042 | 26.98170629                 | 0              |             |      |
| 0                                                             | 0            | 14.13851728 | 0                           | 6.163310877    |             |      |
| 0.003115656                                                   | 1            | AL592295.3  | 1                           | 161403409      |             |      |
| 161470523                                                     | -            | 863         | lincRNA novel transcript    | -              |             |      |
| 7                                                             | 10           | 29          | 0                           | 0              | 0.392182726 |      |
| 0.504949332                                                   | 1.568675949  | 0           | 0                           | 0              |             |      |
| ENSG00000221962                                               | 0            | 0           | 27.55172889                 | 7.272675098    |             |      |
| 5.539041076                                                   | 0            | 13.45448169 | -6.312138716                |                |             |      |
| 0.00312                                                       | 1            | TMEM14EP    | 3                           | 152339695      | 152340990   |      |
| -                                                             | 1296         |             |                             |                |             |      |
| transcribed_processed_pseudogene                              |              |             | "transmembrane protein 14E, |                |             |      |
| pseudogene [Source:HGNC Symbol;Acc:HGNC:34386]" -             |              |             |                             | 0              | 0           |      |
| 0                                                             | 25           | 6           | 6                           | 0              | 0           |      |
| 1.07188218                                                    | 0.284572945  | 0.215266905 |                             |                |             |      |
| ENSG00000147155                                               | 300.0990505  | 339.3333077 | 412.1688237                 |                |             |      |
| 505.8497423                                                   | 601.2078081  | 573.2907514 | 350.5337273                 |                |             |      |
| 560.1161006                                                   | -0.67599326  | 0.003131041 | 1                           | EBP            | X           |      |
| 48521158                                                      | 48528716     | +           | 2409                        | protein_coding |             |      |
| "EBP, cholestenol delta-isomerase [Source:HGNC                |              |             |                             |                |             |      |
| Symbol;Acc:HGNC:3133]" -                                      |              | 312         | 390                         | 443            | 459         | 496  |
| 621                                                           | 6.262085752  | 7.054827592 | 8.584459619                 |                |             |      |
| 10.58736606                                                   | 12.65587675  | 11.98631863 |                             |                |             |      |
| ENSG00000116649                                               | 5865.397467  | 4776.768869 | 4638.062271                 |                |             |      |
| 6231.099005                                                   | 6515.104775  | 7011.502829 | 5093.409536                 |                |             |      |
| 6585.902203                                                   | -0.370902284 | 0.003133009 | 0.070591725                 | SRM            |             |      |
| 1                                                             | 11054584     | 11060024    | -                           | 1898           |             |      |
| protein_coding spermidine synthase [Source:HGNC               |              |             |                             |                |             |      |
| Symbol;Acc:HGNC:11296]" -                                     |              | 6098        | 5490                        | 4985           | 5654        | 5375 |
| 7595                                                          | 155.3432648  | 126.0476445 | 122.6069222                 |                |             |      |
| 165.5280656                                                   | 174.0722812  | 186.0641007 |                             |                |             |      |
| ENSG00000242299                                               | 394.3609317  | 462.0153497 | 548.9381625                 |                |             |      |
| 791.2856536                                                   | 706.661597   | 664.6849292 | 468.4381479                 |                |             |      |
| 720.8773933                                                   | -0.621513707 | 0.003143226 | 1                           | AC073861.1     |             |      |
| 3                                                             | 101576489    | 101576947   | -                           | 459            |             |      |
| processed_pseudogene ribosomal protein S18 (RPS18) pseudogene |              |             |                             |                |             |      |
| -                                                             | 410          | 531         | 590                         | 718            | 583         | 720  |
| 43.18892434                                                   | 50.41275517  | 60.00471287 | 86.92081752                 |                |             |      |
| 78.07342457                                                   | 72.93749255  |             |                             |                |             |      |

|                                                |                                                 |             |             |                |             |      |
|------------------------------------------------|-------------------------------------------------|-------------|-------------|----------------|-------------|------|
| ENSG00000161996                                | 1962.186099                                     | 1302.51785  | 1831.964817 |                |             |      |
| 1248.644353                                    | 904.2359372                                     | 1269.36358  | 1698.889589 |                |             |      |
| 1140.747957                                    | 0.573752651                                     | 0.00314452  | 1           | WDR90          | 16          |      |
| 649311                                         | 667833                                          | +           | 10534       | protein_coding | WD repeat   |      |
| domain 90 [Source:HGNC Symbol;Acc:HGNC:26960]  | -                                               |             | 2040        |                | 1497        |      |
| 1969                                           | 1133                                            | 746         | 1375        | 9.363496875    | 6.192800422 |      |
| 8.725663044                                    | 5.97652361                                      | 4.353042163 | 6.06932512  |                |             |      |
| ENSG00000139990                                | 1252.336422                                     | 1149.382819 | 1090.433096 |                |             |      |
| 825.4497974                                    | 890.9026995                                     | 790.2365269 | 1164.050779 |                |             |      |
| 835.5296746                                    | 0.478830361                                     | 0.003182382 | 1           | DCAF5          | 14          |      |
| 69050881                                       | 69153150                                        | -           | 8295        | protein_coding |             |      |
| DDB1 and CUL4 associated factor 5 [Source:HGNC |                                                 |             |             |                |             |      |
| Symbol;Acc:HGNC:20224]                         | -                                               | 1302        | 1321        | 1172           | 749         | 735  |
| 856                                            | 7.58919672                                      | 6.939769166 | 6.595644768 |                |             |      |
| 5.017385507                                    | 5.446510045                                     | 4.798310993 |             |                |             |      |
| ENSG00000122705                                | 3817.60619                                      | 4044.156959 | 3743.944349 |                |             |      |
| 4898.697396                                    | 5008.448917                                     | 4639.870075 | 3868.569166 |                |             |      |
| 4849.005463                                    | -0.325716494                                    | 0.00321322  | 0.070591725 |                | CLTA        |      |
| 9                                              | 36190856                                        | 36304781    | +           | 2515           |             |      |
| protein_coding                                 | clathrin light chain A [Source:HGNC             |             |             |                |             |      |
| Symbol;Acc:HGNC:2090]                          | -                                               | 3969        | 4648        | 4024           | 4445        | 4132 |
| 5026                                           | 76.30347659                                     | 80.53538288 | 74.69061209 |                |             |      |
| 98.2077632                                     | 100.9879796                                     | 92.92135047 |             |                |             |      |
| ENSG00000196419                                | 8835.608582                                     | 7701.995998 | 7695.368715 |                |             |      |
| 10085.03484                                    | 9989.019247                                     | 10017.35579 | 8077.657765 |                |             |      |
| 10030.46996                                    | -0.3124239                                      | 0.003221445 | 0.070591725 |                | XRCC6       |      |
| 22                                             | 41621119                                        | 41664048    | +           | 3288           |             |      |
| protein_coding                                 | X-ray repair cross complementing 6 [Source:HGNC |             |             |                |             |      |
| Symbol;Acc:HGNC:4055]                          | -                                               | 9186        | 8852        | 8271           | 9151        | 8241 |
| 10851                                          | 135.081492                                      | 117.3189572 | 117.4281578 |                |             |      |
| 154.6495961                                    | 154.0619766                                     | 153.4507349 |             |                |             |      |
| ENSG00000065427                                | 7549.607202                                     | 6898.037085 | 6674.715894 |                |             |      |
| 8404.379379                                    | 8946.602483                                     | 8854.157161 | 7040.786727 |                |             |      |
| 8735.046341                                    | -0.311106968                                    | 0.003233897 | 0.070591725 |                | KARS        |      |
| 16                                             | 75627474                                        | 75648643    | -           | 4065           |             |      |
| protein_coding                                 | lysyl-tRNA synthetase [Source:HGNC              |             |             |                |             |      |
| Symbol;Acc:HGNC:6215]                          | -                                               | 7849        | 7928        | 7174           | 7626        | 7381 |
| 9591                                           | 93.358743                                       | 84.98879844 | 82.38475571 |                |             |      |
| 104.2433344                                    | 111.6097192                                     | 109.7070051 |             |                |             |      |
| ENSG00000171161                                | 1003.215736                                     | 893.5777102 | 984.3670778 |                |             |      |
| 1265.17539                                     | 1267.869692                                     | 1424.45673  | 960.3868413 |                |             |      |
| 1319.167271                                    | -0.458488938                                    | 0.003258148 | 1           | ZNF672         | 1           |      |
| 248838210                                      | 248849517                                       | +           | 3741        | protein_coding |             |      |
| zinc finger protein 672 [Source:HGNC           |                                                 |             |             |                |             |      |
| Symbol;Acc:HGNC:26179]                         |                                                 |             |             |                |             |      |
| zf-C2H2                                        | 1043                                            | 1027        | 1058        | 1148           | 1046        | 1543 |
| 13.48024597                                    | 11.96303389                                     | 13.20212971 | 17.05164269 |                |             |      |
| 17.1866541                                     | 19.1782615                                      |             |             |                |             |      |
| ENSG00000169727                                | 3221.255513                                     | 3748.327921 | 3620.200661 |                |             |      |
| 3970.755167                                    | 4860.57119                                      | 5032.218818 | 3529.928032 |                |             |      |
| 4621.181725                                    | -0.388638019                                    | 0.003259189 | 0.070591725 |                | GPS1        |      |



|                                      |                                                  |             |                                    |             |             |                |
|--------------------------------------|--------------------------------------------------|-------------|------------------------------------|-------------|-------------|----------------|
| 17                                   | 82050691                                         | 82057470    | +                                  | 6155        |             |                |
| protein_coding                       | G protein pathway suppressor 1 [Source:HGNC      |             |                                    |             |             |                |
| Symbol;Acc:HGNC:4549]                | -                                                | 3349        | 4308                               | 3891        | 3603        | 4010           |
| 5451                                 | 26.30802869                                      | 30.50044917 |                                    | 29.51067949 |             |                |
| 32.52731747                          | 40.04641794                                      | 41.17931736 |                                    |             |             |                |
| ENSG0000008988                       | 11245.05769                                      | 14924.57494 |                                    | 13809.0512  |             |                |
| 16289.68419                          | 16776.84934                                      | 18208.67437 |                                    | 13326.22794 |             |                |
| 17091.73596                          | -0.35902572                                      | 0.003268135 |                                    | 0.070591725 |             | RPS20          |
| 8                                    | 56067295                                         | 56074581    | -                                  | 3002        |             |                |
| protein_coding                       | ribosomal protein S20 [Source:HGNC               |             |                                    |             |             |                |
| Symbol;Acc:HGNC:10405]               | -                                                | 11691       | 17153                              | 14842       | 14781       | 13841          |
| 19724                                | 188.2964747                                      | 248.9934928 |                                    | 230.795733  |             |                |
| 273.5931204                          | 283.4028027                                      | 305.5028908 |                                    |             |             |                |
| ENSG00000267523                      | 84.64332192                                      | 13.92136647 |                                    | 53.96341258 |             |                |
| 7.714484088                          | 4.848450065                                      | 11.07808215 |                                    | 50.84270032 |             |                |
| 7.880338769                          | 2.677953825                                      | 0.003280019 |                                    | 1           | AC008735.2  |                |
| 19                                   | 55661901                                         | 55674715    | -                                  | 561         |             |                |
| antisense                            | "novel transcript, antisense to U2AF2A"          |             |                                    | -           |             | 88             |
| 16                                   | 58                                               | 7           | 4                                  | 12          | 7.584396469 |                |
| 1.242841422                          | 4.826265041                                      | 0.693341543 |                                    | 0.438272772 |             |                |
| 0.994602171                          |                                                  |             |                                    |             |             |                |
| ENSG00000176155                      | 727.1630838                                      | 656.9144802 |                                    | 915.5172065 |             |                |
| 569.7697534                          | 373.330655                                       | 500.3600439 |                                    | 766.5315902 |             |                |
| 481.1534841                          | 0.670898319                                      | 0.003284214 |                                    | 1           | CCDC57      | 17             |
| 82101460                             | 82212830                                         | -           |                                    | 12397       |             | protein_coding |
|                                      | coiled-coil domain containing 57 [Source:HGNC    |             |                                    |             |             |                |
| Symbol;Acc:HGNC:27564]               | -                                                | 756         | 755                                | 984         | 517         | 308            |
| 542                                  | 2.948535838                                      | 2.653926849 |                                    | 3.705309868 |             |                |
| 2.31731987                           | 1.527149223                                      | 2.032889176 |                                    |             |             |                |
| ENSG00000279632                      | 38.47423724                                      | 9.570939447 |                                    | 6.512825656 |             |                |
| 1.102069155                          | 0                                                | 0           |                                    | 18.18600078 | 0.367356385 |                |
| 5.563778169                          | 0.003289936                                      | 1           | AP003108.4                         | 11          |             |                |
| 61426448                             | 61427325                                         | -           | 878                                | TEC         | novel       |                |
| transcript                           | -                                                | 40          | 11                                 | 7           | 1           | 0              |
| 2.202757517                          | 0.545954899                                      | 0.372177025 |                                    | 0.06328744  |             |                |
| 0                                    | 0                                                |             |                                    |             |             |                |
| ENSG00000207088                      | 26.93196607                                      | 4.350427021 |                                    | 11.16484398 |             | 0              |
| 0                                    | 0                                                | 14.14907902 | 0                                  | 6.163411953 |             |                |
| 0.003316762                          | 1                                                | SNORA7B     | 3                                  | 129397210   | 129397348   |                |
| -                                    | 139                                              | snoRNA      | "small nucleolar RNA, H/ACA box 7B |             |             |                |
| [Source:HGNC Symbol;Acc:HGNC:32593]" | -                                                |             |                                    | 28          | 5           | 12             |
| 0                                    | 0                                                | 0           | 9.739674603                        | 1.567522567 |             |                |
| 4.030068998                          | 0                                                | 0           | 0                                  |             |             |                |
| ENSG00000184208                      | 628.0919229                                      | 517.7008155 |                                    | 569.4070431 |             |                |
| 360.3766138                          | 318.7855918                                      | 410.8122132 |                                    | 571.7332605 |             |                |
| 363.3248063                          | 0.65252596                                       | 0.003347218 |                                    | 1           | C22orf46    |                |
| 22                                   | 41688939                                         | 41698136    | +                                  | 5341        |             |                |
| protein_coding                       | chromosome 22 open reading frame 46 [Source:HGNC |             |                                    |             |             |                |
| Symbol;Acc:HGNC:26294]               | -                                                | 653         | 595                                | 612         | 327         | 263            |
| 445                                  | 5.911420044                                      | 4.85459479  |                                    | 5.349028108 |             |                |

|                                                                |                                                  |              |             |                |                |      |
|----------------------------------------------------------------|--------------------------------------------------|--------------|-------------|----------------|----------------|------|
| 3.402022788                                                    | 3.026777736                                      | 3.874078809  |             |                |                |      |
| ENSG00000136527                                                | 5018.964248                                      | 5436.293606  | 5429.83579  |                |                |      |
| 6626.741832                                                    | 6502.98365                                       | 6519.451347  | 5295.031214 |                |                |      |
| 6549.725609                                                    | -0.306757494                                     | 0.003349835  | 0.071515084 | TRA2B          |                |      |
| 3                                                              | 185915906                                        | 185938136    | -           | 11769          |                |      |
| protein_coding                                                 | transformer 2 beta homolog                       | [Source:HGNC |             |                |                |      |
| Symbol;Acc:HGNC:10781]                                         | -                                                | 5218         | 6248        | 5836           | 6013           | 5365 |
| 7062                                                           | 21.43708492                                      | 23.1344967   | 23.14844146 |                |                |      |
| 28.38988836                                                    | 28.02060601                                      | 27.90096141  |             |                |                |      |
| ENSG00000092439                                                | 1735.188099                                      | 1937.680195  | 2093.408247 |                |                |      |
| 1626.654073                                                    | 1179.385478                                      | 1336.755246  | 1922.09218  |                |                |      |
| 1380.931599                                                    | 0.476897201                                      | 0.003353804  | 1           | TRPM7          | 15             |      |
| 50552473                                                       | 50686815                                         | -            | 12398       | protein_coding |                |      |
| transient receptor potential cation channel subfamily M member |                                                  |              |             |                |                |      |
| 7 [Source:HGNC Symbol;Acc:HGNC:17994]                          | -                                                | 1804         | 2227        | 2250           |                |      |
| 1476                                                           | 973                                              | 1448         | 7.035356638 | 7.827574013    |                |      |
| 8.471823943                                                    | 6.615257733                                      | 4.824014099  | 5.430601659 |                |                |      |
| ENSG00000132002                                                | 7303.372084                                      | 5776.496999  | 6505.382427 |                |                |      |
| 7445.579214                                                    | 8862.966719                                      | 9043.407731  | 6528.41717  |                |                |      |
| 8450.651221                                                    | -0.372431934                                     | 0.003421992  | 0.071828215 | DNAJB1         |                |      |
| 19                                                             | 14514770                                         | 14529770     | -           | 3672           |                |      |
| protein_coding                                                 | DnaJ heat shock protein family (Hsp40) member B1 |              |             |                |                |      |
| [Source:HGNC Symbol;Acc:HGNC:5270]                             | -                                                | 7593         | 6639        | 6992           |                |      |
| 6756                                                           | 7312                                             | 9796         | 99.97972637 | 78.78773107    |                |      |
| 88.88833737                                                    | 102.2348613                                      | 122.3998457  | 124.0443884 |                |                |      |
| ENSG00000126457                                                | 5813.457247                                      | 6009.679887  | 6221.609309 |                |                |      |
| 6689.559773                                                    | 8267.819474                                      | 7919.905566  | 6014.915481 |                |                |      |
| 7625.761604                                                    | -0.342314032                                     | 0.003442747  | 0.071828215 | PRMT1          |                |      |
| 19                                                             | 49675786                                         | 49689029     | +           | 4796           |                |      |
| protein_coding                                                 | protein arginine methyltransferase 1             | [Source:HGNC |             |                |                |      |
| Symbol;Acc:HGNC:5187]                                          | -                                                | 6044         | 6907        | 6687           | 6070           | 6821 |
| 8579                                                           | 60.93214933                                      | 62.75796886  | 65.08758901 |                |                |      |
| 70.32691394                                                    | 87.42109366                                      | 83.17417686  |             |                |                |      |
| ENSG00000008710                                                | 2651.836802                                      | 1902.006694  | 2508.368281 |                |                |      |
| 1464.649908                                                    | 1644.836685                                      | 1927.586295  | 2354.070592 |                |                |      |
| 1679.024296                                                    | 0.486965217                                      | 0.003489967  | 1           | PKD1           | 16             |      |
| 2088710                                                        | 2135898                                          | -            | 18532       | protein_coding | "polycystin 1, |      |
| transient receptor potential channel interacting               | [Source:HGNC                                     |              |             |                |                |      |
| Symbol;Acc:HGNC:9008]"                                         | -                                                | 2757         | 2186        | 2696           | 1329           | 1357 |
| 2088                                                           | 7.19309326                                       | 5.1402763    | 6.791154833 |                |                |      |
| 3.984875278                                                    | 4.500957543                                      | 5.238889291  |             |                |                |      |
| ENSG00000184967                                                | 1299.467363                                      | 1239.001616  | 1316.521186 |                |                |      |
| 1449.220939                                                    | 1856.956375                                      | 2058.676933  | 1284.996722 |                |                |      |
| 1788.284749                                                    | -0.477182012                                     | 0.003506924  | 1           | NOC4L          | 12             |      |
| 132144448                                                      | 132152473                                        | +            | 2029        | protein_coding |                |      |
| nucleolar complex associated 4 homolog                         | [Source:HGNC                                     |              |             |                |                |      |
| Symbol;Acc:HGNC:28461]                                         | -                                                | 1351         | 1424        | 1415           | 1315           | 1532 |
| 2230                                                           | 32.19396877                                      | 30.58345458  | 32.55520457 |                |                |      |
| 36.01270549                                                    | 46.41133688                                      | 51.10387523  |             |                |                |      |
| ENSG00000196739                                                | 1240.794151                                      | 863.124721   | 1163.004581 |                |                |      |

|                                                 |                                                     |              |                               |                  |                |             |
|-------------------------------------------------|-----------------------------------------------------|--------------|-------------------------------|------------------|----------------|-------------|
| 778.0608237                                     | 746.66131                                           | 705.3045637  | 1088.974484                   |                  |                |             |
| 743.3422325                                     | 0.55081888                                          | 0.003511869  | 1                             | COL27A1          | 9              |             |
| 114155560                                       | 114312511                                           | +            | 13988                         | protein_coding   |                |             |
| collagen type XXVII alpha 1 chain [Source:HGNC  |                                                     |              |                               |                  |                |             |
| Symbol;Acc:HGNC:22986]                          | -                                                   | 1290         | 992                           | 1250             | 706            | 616         |
| 764                                             | 4.458977728                                         | 3.090399652  | 4.171578545                   |                  |                |             |
| 2.804536658                                     | 2.706901475                                         | 2.539620085  |                               |                  |                |             |
| ENSG00000146826                                 | 632.9012026                                         | 425.4717627  | 531.2604928                   |                  |                |             |
| 276.619358                                      | 232.7256031                                         | 401.580478   | 529.8778194                   |                  |                |             |
| 303.6418131                                     | 0.800585769                                         | 0.003514334  | 1                             | C7orf43          | 7              |             |
| 100154420                                       | 100158715                                           | -            | 3255                          | protein_coding   |                |             |
| chromosome 7 open reading frame 43 [Source:HGNC |                                                     |              |                               |                  |                |             |
| Symbol;Acc:HGNC:25604]                          | -                                                   | 658          | 489                           | 571              | 251            | 192         |
| 435                                             | 9.774085127                                         | 6.546609916  | 8.189005281                   |                  |                |             |
| 4.284841605                                     | 3.625747832                                         | 6.213971859  |                               |                  |                |             |
| ENSG00000157106                                 | 3675.251512                                         | 2834.738247  | 2978.222132                   |                  |                |             |
| 2567.821132                                     | 2185.438867                                         | 2360.554672  | 3162.737297                   |                  |                |             |
| 2371.271557                                     | 0.415286764                                         | 0.003549739  | 0.073228322                   |                  |                | SMG1        |
| 16                                              | 18804853                                            | 18926454     | -                             | 25988            |                |             |
| protein_coding                                  | "SMG1, nonsense mediated mRNA decay associated PI3K |              |                               |                  |                |             |
| related kinase                                  | [Source:HGNC Symbol;Acc:HGNC:30045]"                |              |                               |                  | -              | 3821        |
| 3258                                            | 3201                                                | 2330         | 1803                          | 2557             | 7.108948959    |             |
| 5.463070683                                     | 5.749880938                                         | 4.981901156  | 4.26452072                    |                  |                |             |
| 4.574976716                                     |                                                     |              |                               |                  |                |             |
| ENSG00000229751                                 | 25.97011014                                         | 7.830768638  | 7.443229322                   |                  |                | 0           |
| 0                                               | 0                                                   | 13.74803603  | 0                             | 6.122158721      |                |             |
| 0.003555649                                     | 1                                                   | AC044781.1   | 10                            | 13991815         |                |             |
| 14007526                                        | +                                                   | 570          | antisense                     | novel transcript |                |             |
| -                                               | 27                                                  | 9            | 8                             | 0                | 0              |             |
| 2.290288144                                     | 0.688059906                                         | 0.655180808  | 0                             | 0                | 0              |             |
| ENSG00000257557                                 | 10.58041524                                         | 6.960683234  | 23.26009163                   |                  |                | 0           |
| 0                                               | 0                                                   | 13.6003967   | 0                             | 6.107072995      |                |             |
| 0.0035635                                       | 1                                                   | PPP1R12A-AS1 | 12                            | 79934901         |                |             |
| 79942712                                        | +                                                   | 3234         | bidirectional_promoter_lncRNA |                  |                |             |
| PPP1R12A antisense RNA 1                        | [Source:HGNC Symbol;Acc:HGNC:51903]                 |              |                               |                  | -              |             |
| 11                                              | 8                                                   | 25           | 0                             | 0                | 0.164457577    |             |
| 0.10779747                                      | 0.360866053                                         | 0            | 0                             | 0                |                |             |
| ENSG00000171612                                 | 578.0754145                                         | 841.3725859  | 788.0519044                   |                  |                |             |
| 1085.538118                                     | 1056.962114                                         | 1088.421572  | 735.8333016                   |                  |                |             |
| 1076.973935                                     | -0.549210855                                        | 0.003572517  | 1                             | SLC25A33         |                |             |
| 1                                               | 9539482                                             | 9585179      | +                             | 3854             | protein_coding | solute      |
| carrier family 25 member 33                     | [Source:HGNC Symbol;Acc:HGNC:29681]                 |              |                               |                  | -              |             |
| 601                                             | 967                                                 | 847          | 985                           | 872              | 1179           | 7.539872087 |
| 10.93385629                                     | 10.25930015                                         | 14.2015767   | 13.90759819                   |                  |                |             |
| 14.22437237                                     |                                                     |              |                               |                  |                |             |
| ENSG00000279123                                 | 7.694847448                                         | 13.92136647  | 18.6080733                    |                  |                | 0           |
| 0                                               | 0                                                   | 13.40809574  | 0                             | 6.087148953      |                |             |
| 0.003587302                                     | 1                                                   | AC027281.2   | 16                            | 70778433         |                |             |
| 70779145                                        | +                                                   | 713          | TEC                           | novel transcript |                | -           |
| 8                                               | 16                                                  | 20           | 0                             | 0                | 0              | 0.542502412 |

|                                                                    |              |             |                |                    |                |
|--------------------------------------------------------------------|--------------|-------------|----------------|--------------------|----------------|
| 0.977887851                                                        | 1.309442708  | 0           | 0              | 0                  |                |
| ENSG00000173281                                                    | 1328.323041  | 1632.280218 | 1144.396508    |                    |                |
| 1013.903623                                                        | 807.2669359  | 1009.028649 | 1368.333256    |                    |                |
| 943.3997361                                                        | 0.536076803  | 0.003604972 | 1              | PPP1R3B            | 8              |
| 9136255                                                            | 9151574      | -           | 5776           | protein_coding     | protein        |
| phosphatase 1 regulatory subunit 3B [Source:HGNC                   |              |             |                |                    |                |
| Symbol;Acc:HGNC:14942] -                                           |              |             |                |                    |                |
| 1093                                                               | 11.56026289  | 1381        | 1876           | 1230               | 920 666        |
| 8.850599451                                                        | 7.087521752  | 14.15351297 | 8.79881113     | 9.940860118        |                |
| ENSG00000173825                                                    | 28.85567793  | 20.8820497  | 3.721614661    |                    |                |
| 1.102069155                                                        | 0            | 0           | 17.81978076    | 0.367356385        |                |
| 5.535327538                                                        | 0.003619603  | 1           | TIGD3          | 11                 | 65354767       |
| 65357613                                                           | +            | 2012        | protein_coding | tigger             |                |
| transposable element derived 3 [Source:HGNC Symbol;Acc:HGNC:18334] |              |             |                |                    |                |
| -                                                                  | 30           | 24          | 4              | 1                  | 0 0            |
| 0.720932318                                                        | 0.519806688  | 0.092806427 | 0.027617481    | 0                  |                |
| 0                                                                  |              |             |                |                    |                |
| ENSG00000117419                                                    | 2541.22337   | 2544.999807 | 2524.185144    |                    |                |
| 2802.561862                                                        | 3361.188008  | 4117.353867 | 2536.802774    |                    |                |
| 3427.034579                                                        | -0.43428174  | 0.003651343 | 0.073349648    | ERI3               |                |
| 1                                                                  | 44221070     | 44355260    | -              | 2785               |                |
| protein_coding ERI1 exoribonuclease family member 3 [Source:HGNC   |              |             |                |                    |                |
| Symbol;Acc:HGNC:17276] -                                           |              |             |                |                    |                |
| 4460                                                               | 45.86789718  | 45.76771903 | 45.47478245    | 2713               | 2543 2773      |
| 50.73798367                                                        | 61.20290413  | 74.46302538 |                |                    |                |
| ENSG00000253406                                                    | 22.12268641  | 13.05128106 | 5.582421991    | 0                  |                |
| 0                                                                  | 0            | 13.58546316 | 0              | 6.105496578        |                |
| 0.003655212                                                        | 1            | AC012613.2  | 5              | 149216523          |                |
| 149276805                                                          | -            | 4533        | antisense      | "novel transcript, |                |
| antisense to ABLIM3"                                               |              |             |                |                    |                |
| 0                                                                  | 0.245325862  | 0.144199627 | 0.061789057    | 6                  | 0 0            |
| 0                                                                  | 0            |             |                |                    |                |
| ENSG00000108829                                                    | 6844.566805  | 6496.057628 | 7109.214406    |                    |                |
| 7620.80821                                                         | 8700.543642  | 9621.31435  | 6816.612946    |                    |                |
| 8647.5554                                                          | -0.343365943 | 0.00366759  | 0.073349648    | LRR59              |                |
| 17                                                                 | 50375059     | 50397553    | -              | 4570               |                |
| protein_coding leucine rich repeat containing 59 [Source:HGNC      |              |             |                |                    |                |
| Symbol;Acc:HGNC:28817] -                                           |              |             |                |                    |                |
| 10422                                                              | 75.2871671   | 71.19186714 | 78.05128104    | 7641               | 6915 7178      |
| 84.07909492                                                        | 96.54607312  | 106.0390643 |                |                    |                |
| ENSG00000111640                                                    | 40654.76463  | 42664.6378  | 53496.34994    |                    |                |
| 57251.39055                                                        | 68687.99207  | 52580.27059 | 45605.25079    |                    |                |
| 59506.55107                                                        | -0.383824811 | 0.003675473 | 0.073349648    | GAPDH              |                |
| 12                                                                 | 6533927      | 6538374     | +              | 2981               | protein_coding |
| glyceraldehyde-3-phosphate dehydrogenase [Source:HGNC              |              |             |                |                    |                |
| Symbol;Acc:HGNC:4141] -                                            |              |             |                |                    |                |
| 56956                                                              | 685.5524138  | 716.8079302 | 900.4027201    | 57498              | 51949 56668    |
| 968.3386345                                                        | 1168.485344  | 888.3999459 |                |                    |                |
| ENSG00000197479                                                    | 38.47423724  | 15.66153728 | 22.32968796    | 0                  |                |
| 0                                                                  | 3.692694051  | 25.48848749 | 1.230898017    |                    |                |

|                                                               |                                                    |             |                |                |               |
|---------------------------------------------------------------|----------------------------------------------------|-------------|----------------|----------------|---------------|
| 4.284323969                                                   | 0.003709825                                        | 1           | PCDHB11        | 5              | 141199582     |
| 141203779                                                     | +                                                  | 4198        | protein_coding |                | protocadherin |
| beta 11 [Source:HGNC Symbol;Acc:HGNC:8682]                    |                                                    | -           |                |                | 40 18         |
| 24                                                            | 0                                                  | 0           | 4              | 0.460700595    | 0.186848093   |
| 0.266879271                                                   | 0                                                  | 0           | 0              | 0.044304575    |               |
| ENSG00000178035                                               | 10281.27805                                        | 9224.645456 | 10273.51727    |                |               |
| 10935.83223                                                   | 13102.9363                                         | 13647.27404 | 9926.480258    |                |               |
| 12562.01419                                                   | -0.33978165                                        | 0.003739736 | 0.073829632    |                | IMPDH2        |
| 3                                                             | 49024325                                           | 49029408    | -              | 2773           |               |
| protein_coding                                                | inosine monophosphate dehydrogenase 2 [Source:HGNC |             |                |                |               |
| Symbol;Acc:HGNC:6053]                                         | -                                                  | 10689       | 10602          | 11042          | 9923 10810    |
| 14783                                                         | 186.3753294                                        | 166.6082597 | 185.8848131    |                |               |
| 198.840646                                                    | 239.6200666                                        | 247.8812774 |                |                |               |
| ENSG00000112576                                               | 1393.729244                                        | 1136.331538 | 1277.444232    |                |               |
| 1769.923064                                                   | 1641.200347                                        | 1710.640519 | 1269.168338    |                |               |
| 1707.254643                                                   | -0.428103206                                       | 0.00376302  | 1              | CCND3          | 6             |
| 41934933                                                      | 42050357                                           | -           | 5802           | protein_coding |               |
| cyclin D3 [Source:HGNC Symbol;Acc:HGNC:1585]                  |                                                    |             | -              |                | 1449          |
| 1306                                                          | 1373                                               | 1606        | 1354           | 1853           | 12.07513174   |
| 9.808984544                                                   | 11.04685996                                        | 15.38083312 | 14.3445953     |                |               |
| 14.85007725                                                   |                                                    |             |                |                |               |
| ENSG00000166432                                               | 159.6680845                                        | 94.83930906 | 123.7436875    |                |               |
| 28.65379804                                                   | 72.72675098                                        | 19.38664377 | 126.0836937    |                |               |
| 40.25573093                                                   | 1.655634581                                        | 0.003769246 | 1              | ZMAT1          | X             |
| 101882288                                                     | 101932031                                          | -           | 7514           | protein_coding |               |
| zinc finger matrin-type 1 [Source:HGNC Symbol;Acc:HGNC:29377] |                                                    |             |                |                |               |
| -                                                             | 166                                                | 109         | 133            | 26             | 60 21         |
| 1.068164435                                                   | 0.632140921                                        | 0.826278564 | 0.192271184    |                |               |
| 0.490825842                                                   | 0.129950849                                        |             |                |                |               |
| ENSG00000108106                                               | 4112.895961                                        | 3884.061245 | 3929.094678    |                |               |
| 4701.427017                                                   | 4910.267804                                        | 5341.481945 | 3975.350628    |                |               |
| 4984.392255                                                   | -0.32652083                                        | 0.003780678 | 0.07384388     |                | UBE2S         |
| 19                                                            | 55399745                                           | 55407777    | -              | 2788           |               |
| protein_coding                                                | ubiquitin conjugating enzyme E2 S [Source:HGNC     |             |                |                |               |
| Symbol;Acc:HGNC:17895]                                        | -                                                  | 4276        | 4464           | 4223           | 4266 4051     |
| 5786                                                          | 74.15597402                                        | 69.77342055 | 70.70894343    |                |               |
| 85.02372447                                                   | 89.31344349                                        | 96.49763686 |                |                |               |
| ENSG00000228589                                               | 66.36805924                                        | 72.21708855 | 87.45794453    |                |               |
| 234.7407301                                                   | 210.9075778                                        | 98.77956586 | 75.34769744    |                |               |
| 181.4759579                                                   | -1.266123894                                       | 0.003795949 | 1              | SPCS2P4        | 1             |
| 28095742                                                      | 28096422                                           | -           | 681            |                |               |
| processed_pseudogene                                          | signal peptidase complex subunit 2 pseudogene      |             |                |                |               |
| 4 [Source:HGNC Symbol;Acc:HGNC:45237]                         |                                                    |             | -              | 69             | 83 94         |
| 213                                                           | 174                                                | 107         | 4.898952125    | 5.311162365    |               |
| 6.443573363                                                   | 17.37979042                                        | 15.70541789 | 7.3057984      |                |               |
| ENSG00000008083                                               | 941.6569564                                        | 762.1948141 | 585.2239054    |                |               |
| 406.6635183                                                   | 494.5419067                                        | 540.9796785 | 763.0252253    |                |               |
| 480.7283678                                                   | 0.665882056                                        | 0.003817552 | 1              | JARID2         | 6             |
| 15246296                                                      | 15522040                                           | +           | 6015           | protein_coding |               |
| jumonji and AT-rich interaction domain containing 2           |                                                    |             |                |                |               |

|                                                                     |              |             |                                        |                   |
|---------------------------------------------------------------------|--------------|-------------|----------------------------------------|-------------------|
| [Source:HGNC Symbol;Acc:HGNC:6196]                                  | ARID         | 979         | 876                                    | 629               |
| 369                                                                 | 408          | 586         | 7.869520601                            | 6.346394607       |
| 4.881587178                                                         | 3.408809866  | 4.169383963 | 4.529945765                            |                   |
| ENSG00000159199                                                     | 857.0136345  | 797.8683157 | 970.4110228                            |                   |
| 1223.296763                                                         | 1199.991391  | 1203.818261 | 875.0976577                            |                   |
| 1209.035471                                                         | -0.466478514 | 0.003823124 | 1                                      | ATP5MC1 17        |
| 48892765                                                            | 48895871     | +           | 2615                                   | protein_coding    |
| ATP synthase membrane subunit c locus 1 [Source:HGNC                |              |             |                                        |                   |
| Symbol;Acc:HGNC:841]                                                | -            | 891         | 917                                    | 1043 1110 990     |
| 1304                                                                | 16.47430975  | 15.28115709 | 18.61909857                            |                   |
| 23.58649069                                                         | 23.27077578  | 23.1865918  |                                        |                   |
| ENSG00000172500                                                     | 1525.503506  | 1693.186197 | 1690.54346                             |                   |
| 2186.505204                                                         | 2111.500003  | 2093.757527 | 1636.411054                            |                   |
| 2130.587578                                                         | -0.380578914 | 0.003884763 | 1                                      | FIBP 11           |
| 65883741                                                            | 65888539     | -           | 3353                                   | protein_coding    |
| FGF1 intracellular binding protein [Source:HGNC                     |              |             |                                        |                   |
| Symbol;Acc:HGNC:3705]                                               | -            | 1586        | 1946                                   | 1817 1984 1742    |
| 2268                                                                | 22.87024653  | 25.2911094  | 25.29690616                            |                   |
| 32.87911794                                                         | 31.93463505  | 31.45143859 |                                        |                   |
| ENSG00000168439                                                     | 11518.22477  | 10011.20266 | 10109.76623                            |                   |
| 12484.23939                                                         | 13010.81575  | 13647.27404 | 10546.39789                            |                   |
| 13047.44306                                                         | -0.307088727 | 0.003904025 | 0.075231367                            | STIP1             |
| 11                                                                  | 64185272     | 64204543    | +                                      | 4657              |
| protein_coding stress induced phosphoprotein 1 [Source:HGNC         |              |             |                                        |                   |
| Symbol;Acc:HGNC:11387]                                              | -            | 11975       | 11506                                  | 10866 11328 10734 |
| 14783                                                               | 124.3284446  | 107.6655416 | 108.920468                             |                   |
| 135.1633808                                                         | 141.6780965  | 147.6003397 |                                        |                   |
| ENSG00000204387                                                     | 366.4671097  | 442.0033854 | 532.1908965                            |                   |
| 170.8207191                                                         | 316.3613668  | 261.2581041 | 446.8871305                            |                   |
| 249.4800633                                                         | 0.841712834  | 0.00392774  | 1                                      | C6orf48 6         |
| 31834608                                                            | 31839766     | +           | 1801                                   | protein_coding    |
| chromosome 6 open reading frame 48 [Source:HGNC                     |              |             |                                        |                   |
| Symbol;Acc:HGNC:19078]                                              | -            | 381         | 508                                    | 572 155 261       |
| 283                                                                 | 10.22851248  | 12.29160505 | 14.82614871                            |                   |
| 4.782225259                                                         | 8.907875832  | 7.306404983 |                                        |                   |
| ENSG00000178982                                                     | 3928.219622  | 3312.415134 | 3357.826828                            |                   |
| 3924.468262                                                         | 4787.844439  | 5323.018474 | 3532.820528                            |                   |
| 4678.443725                                                         | -0.405437637 | 0.003933666 | 0.075231367                            | EIF3K             |
| 19                                                                  | 38619082     | 38636955    | +                                      | 2798              |
| protein_coding eukaryotic translation initiation factor 3 subunit K |              |             |                                        |                   |
| [Source:HGNC Symbol;Acc:HGNC:24656]                                 | -            | 4084        | 3807                                   | 3609              |
| 3561                                                                | 3950         | 5766        | 70.57310732                            | 59.29168114       |
| 60.21229875                                                         | 70.71903196  | 86.77542426 | 95.82039262                            |                   |
| ENSG00000265692                                                     | 0            | 36.54358698 | 14.88645864                            | 0 0               |
| 0                                                                   | 17.14334854  | 0           | 6.442488849                            | 0.003986497       |
| 1                                                                   | LINC01970    | 17          | 82290046                               | 82292814          |
| -                                                                   | 1810         | lincRNA     | long intergenic non-protein coding RNA |                   |
| 1970 [Source:HGNC Symbol;Acc:HGNC:52796]                            | -            | 0           | 42                                     |                   |
| 16                                                                  | 0            | 0           | 0                                      | 1.011181961       |
| 0.412655315                                                         | 0            | 0           | 0                                      |                   |

|                                                            |              |             |                          |                |             |     |
|------------------------------------------------------------|--------------|-------------|--------------------------|----------------|-------------|-----|
| ENSG00000182871                                            | 592.5032535  | 294.958952  | 413.0992273              |                |             |     |
| 210.4952087                                                | 231.5134906  | 271.4130127 | 433.5204776              |                |             |     |
| 237.8072373                                                | 0.864906389  | 0.00399759  | 1                        | COL18A1        | 21          |     |
| 45405137                                                   | 45513720     | +           | 8525                     | protein_coding |             |     |
| collagen type XVIII alpha 1 chain [Source:HGNC             |              |             |                          |                |             |     |
| Symbol;Acc:HGNC:2195]                                      | -            | 616         | 339                      | 444            | 191         | 191 |
| 294                                                        | 3.493715535  | 1.732861721 | 2.431277989              |                |             |     |
| 1.244947459                                                | 1.377166151  | 1.603555371 |                          |                |             |     |
| ENSG00000146083                                            | 1097.477617  | 1128.500769 | 1213.246379              |                |             |     |
| 880.5532552                                                | 823.0243986  | 797.621915  | 1146.408255              |                |             |     |
| 833.7331896                                                | 0.459670385  | 0.004047336 | 1                        | RNF44          | 5           |     |
| 176526697                                                  | 176538025    | -           | 5660                     | protein_coding |             |     |
| ring finger protein 44 [Source:HGNC Symbol;Acc:HGNC:19180] |              |             |                          |                |             |     |
| -                                                          | 1141         | 1297        | 1304                     | 799            | 679         | 864 |
| 9.746987963                                                | 9.985783424  | 10.75492029 | 7.844086818              |                |             |     |
| 7.373958741                                                | 7.097874717  |             |                          |                |             |     |
| ENSG00000263990                                            | 25.0082542   | 2.610256213 | 13.95605498              |                |             | 0   |
| 0                                                          | 0            | 13.85818847 | 0                        | 6.133409229    |             |     |
| 0.004053622                                                | 1            | AC004253.1  | 17                       | 31873926       |             |     |
| 31886666                                                   | +            | 488         | lincRNA novel transcript |                |             | -   |
| 26                                                         | 3            | 15          | 0                        | 0              | 2.576052694 |     |
| 0.267892176                                                | 1.434886247  | 0           | 0                        | 0              |             |     |
| ENSG00000275481                                            | 14.42783896  | 26.10256213 | 1.86080733               |                |             | 0   |
| 0                                                          | 0            | 14.13040281 | 0                        | 6.163318933    |             |     |
| 0.004053687                                                | 1            | AC025031.4  | 12                       | 46388856       |             |     |
| 46392126                                                   | +            | 3271        | lincRNA novel transcript |                |             | -   |
| 15                                                         | 30           | 2           | 0                        | 0              | 0.221723605 |     |
| 0.399667937                                                | 0.028542729  | 0           | 0                        | 0              |             |     |
| ENSG00000049130                                            | 468.4238384  | 476.8068015 | 370.3006587              |                |             |     |
| 600.6276897                                                | 816.963836   | 628.6811622 | 438.5104329              |                |             |     |
| 682.090896                                                 | -0.636538532 | 0.004054832 | 1                        | KITLG          | 12          |     |
| 88492793                                                   | 88580851     | -           | 6205                     | protein_coding |             |     |
| KIT ligand [Source:HGNC Symbol;Acc:HGNC:6343]              |              |             |                          |                |             |     |
| 548                                                        | 398          | 545         | 674                      | 681            | 3.794795631 | 487 |
| 3.848552102                                                | 2.994244925  | 4.880527454 | 6.67675547               |                |             |     |
| 5.103126619                                                |              |             |                          |                |             |     |
| ENSG00000173295                                            | 291.4423471  | 274.0769023 | 290.2859435              |                |             |     |
| 159.8000275                                                | 163.6351897  | 161.5553647 | 285.2683977              |                |             |     |
| 161.6635273                                                | 0.819306027  | 0.004087685 | 1                        | FAM86B3P       |             |     |
| 8                                                          | 8228595      | 8244865     | +                        | 4870           |             |     |
| transcribed_unprocessed_pseudogene "family with sequence   |              |             |                          |                |             |     |
| similarity 86 member B3, pseudogene [Source:HGNC           |              |             |                          |                |             |     |
| Symbol;Acc:HGNC:44371]"                                    | -            | 303         | 315                      | 312            | 145         | 135 |
| 175                                                        | 3.008256639  | 2.818643761 | 2.99069186               |                |             |     |
| 1.65444024                                                 | 1.703931641  | 1.670860167 |                          |                |             |     |
| ENSG00000196440                                            | 337.6114318  | 336.7230514 | 390.7695394              |                |             |     |
| 217.1076236                                                | 231.5134906  | 170.7870999 | 355.0346742              |                |             |     |
| 206.4694047                                                | 0.783873969  | 0.00410257  | 1                        | ARMCX4         | X           |     |
| 101418287                                                  | 101533459    | +           | 13351                    | protein_coding |             |     |
| armadillo repeat containing X-linked 4 [Source:HGNC        |              |             |                          |                |             |     |

|                                                                    |             |                |                |                    |          |      |
|--------------------------------------------------------------------|-------------|----------------|----------------|--------------------|----------|------|
| Symbol;Acc:HGNC:28615]                                             | -           | 351            | 387            | 420                | 197      | 191  |
| 185                                                                | 1.271143371 | 1.263152444    | 1.468525629    |                    |          |      |
| 0.819906773                                                        | 0.879360455 | 0.644301215    |                |                    |          |      |
| ENSG00000185105                                                    | 45.20722875 | 19.14187889    | 15.81686231    |                    |          |      |
| 4.408276622                                                        | 0           | 0              | 26.72198999    | 1.469425541        |          |      |
| 4.198722121                                                        | 0.00416481  | 1              | MYADML2        | 17                 | 81939645 |      |
| 81947233                                                           | -           | 2452           | protein_coding |                    | myeloid  |      |
| associated differentiation marker like 2 [Source:HGNC              |             |                |                |                    |          |      |
| Symbol;Acc:HGNC:34548]                                             | -           | 47             | 22             | 17                 | 4        | 0    |
| 0                                                                  | 0.926784173 | 0.390985645    | 0.323649165    |                    |          |      |
| 0.09064661                                                         | 0           | 0              |                |                    |          |      |
| ENSG00000272159                                                    | 11.54227117 | 22.62222051    | 5.582421991    |                    |          | 0    |
| 0                                                                  | 0           | 13.24897122    | 0              | 6.070412692        |          |      |
| 0.004185483                                                        | 1           | AC087623.3     | 8              | 38408048           |          |      |
| 38408742                                                           | -           | 695            | antisense      | "novel transcript, |          |      |
| antisense to LETM2"                                                | -           | 12             | 26             | 6                  | 0        | 0    |
| 0                                                                  | 0.834829252 | 1.630223469    | 0.4030069      |                    |          | 0    |
| 0                                                                  | 0           |                |                |                    |          |      |
| ENSG00000105131                                                    | 16.35155083 | 13.05128106    | 9.304036652    |                    |          | 0    |
| 0                                                                  | 0           | 12.90228951    | 0              | 6.031285479        |          |      |
| 0.004216457                                                        | 1           | EPHX3          | 19             | 15226919           | 15233435 |      |
| -                                                                  | 2034        | protein_coding | epoxide        | hydrolase          | 3        |      |
| [Source:HGNC Symbol;Acc:HGNC:23760]                                |             |                |                |                    |          |      |
| 0                                                                  | 0           | 0              | 0.40410962     | 0.321365246        |          | 10   |
| 0.229506551                                                        | 0           | 0              | 0              |                    |          |      |
| ENSG00000148082                                                    | 1709.217989 | 1728.859698    | 1746.36768     |                    |          |      |
| 1287.216774                                                        | 1334.53588  | 1339.524767    | 1728.148456    |                    |          |      |
| 1320.425807                                                        | 0.388192492 | 0.00423049     | 1              | SHC3               | 9        |      |
| 89005771                                                           | 89178767    | -              | 9929           | protein_coding     |          |      |
| SHC adaptor protein 3 [Source:HGNC Symbol;Acc:HGNC:18181]          |             |                |                |                    |          |      |
| -                                                                  | 1777        | 1987           | 1877           | 1168               | 1101     | 1451 |
| 8.65332736                                                         | 8.720692119 | 8.8247985      | 6.536561862    |                    |          |      |
| 6.815993514                                                        | 6.795054117 |                |                |                    |          |      |
| ENSG00000123908                                                    | 4613.061045 | 3506.444179    | 4270.552823    |                    |          |      |
| 3533.233712                                                        | 2770.889212 | 3000.313916    | 4130.019349    |                    |          |      |
| 3101.478947                                                        | 0.413032662 | 0.004243448    | 0.080319286    |                    |          | AG02 |
| 8                                                                  | 140520156   | 140635619      | -              | 15833              |          |      |
| protein_coding "argonaute 2, RISC catalytic component [Source:HGNC |             |                |                |                    |          |      |
| Symbol;Acc:HGNC:3263]"                                             | -           | 4796           | 4030           | 4590               | 3206     | 2286 |
| 3250                                                               | 14.64593759 | 11.09175919    | 13.53304449    |                    |          |      |
| 11.25154988                                                        | 8.874836779 | 9.544455717    |                |                    |          |      |
| ENSG00000253661                                                    | 25.97011014 | 0.870085404    | 16.74726597    |                    |          | 0    |
| 0                                                                  | 0           | 14.52915384    | 0              | 6.201625326        |          |      |
| 0.00432605                                                         | 1           | ZFH4-AS1       | 8              | 76491200           |          |      |
| 76683278                                                           | -           | 2251           | antisense      | ZFH4 antisense     | RNA      | 1    |
| [Source:HGNC Symbol;Acc:HGNC:44165]                                |             |                |                |                    |          |      |
| 0                                                                  | 0           | 0              | 0.579948575    | 0.019359008        |          | 18   |
| 0.373287155                                                        | 0           | 0              | 0              |                    |          |      |
| ENSG0000025770                                                     | 877.212609  | 1078.905901    | 1197.429517    |                    |          |      |
| 1332.401609                                                        | 1581.806834 | 1495.541091    | 1051.182676    |                    |          |      |



|                                                         |                                             |             |                          |                 |             |             |
|---------------------------------------------------------|---------------------------------------------|-------------|--------------------------|-----------------|-------------|-------------|
| 1469.916511                                             | -0.483490039                                | 0.004422677 | 1                        | NCAPH2          | 22          |             |
| 50508216                                                | 50523472                                    | +           | 3159                     | protein_coding  |             |             |
| non-SMC condensin II complex subunit H2 [Source:HGNC    |                                             |             |                          |                 |             |             |
| Symbol;Acc:HGNC:25071]                                  | -                                           | 912         | 1240                     | 1287            | 1209        | 1305        |
| 1620                                                    | 13.95874678                                 | 17.10529849 | 19.01844289              |                 |             |             |
| 21.26614245                                             | 25.39266283                                 | 23.84494949 |                          |                 |             |             |
| ENSG00000089159                                         | 3252.034903                                 | 3184.51258  | 3127.086719              |                 |             |             |
| 2665.905287                                             | 2423.01292                                  | 2480.567229 | 3187.878067              |                 |             |             |
| 2523.161812                                             | 0.337328885                                 | 0.00448682  | 0.084059205              |                 |             | PXN         |
| 12                                                      | 120210439                                   | 120265771   | -                        | 7460            |             |             |
| protein_coding                                          | paxillin [Source:HGNC Symbol;Acc:HGNC:9718] |             |                          |                 | -           |             |
| 3381                                                    | 3660                                        | 3361        | 2419                     | 1999            | 2687        | 21.91328867 |
| 21.37966302                                             | 21.03176502                                 | 18.0181038  | 16.47105157              |                 |             |             |
| 16.74788064                                             |                                             |             |                          |                 |             |             |
| ENSG00000112343                                         | 419.3691859                                 | 550.7640609 | 512.6524195              |                 |             |             |
| 328.4166083                                             | 270.3010911                                 | 327.726597  | 494.2618888              |                 |             |             |
| 308.8147655                                             | 0.677900344                                 | 0.004502823 | 1                        | TRIM38          | 6           |             |
| 25962802                                                | 25991226                                    | +           | 9413                     | protein_coding  |             |             |
| tripartite motif containing 38 [Source:HGNC             |                                             |             |                          |                 |             |             |
| Symbol;Acc:HGNC:10059]                                  | -                                           | 436         | 633                      | 551             | 298         | 223         |
| 355                                                     | 2.239544246                                 | 2.93044955  | 2.732559178              |                 |             |             |
| 1.759139373                                             | 1.456210521                                 | 1.753603132 |                          |                 |             |             |
| ENSG00000166436                                         | 509.7836434                                 | 281.907671  | 457.7586033              |                 |             |             |
| 254.5779749                                             | 184.2411025                                 | 253.872716  | 416.4833059              |                 |             |             |
| 230.8972645                                             | 0.849256149                                 | 0.004511457 | 1                        | TRIM66          | 11          |             |
| 8612037                                                 | 8682694                                     | -           | 11752                    | protein_coding  | tripartite  |             |
| motif containing 66 [Source:HGNC Symbol;Acc:HGNC:29005] |                                             |             |                          |                 |             |             |
| 324                                                     | 492                                         | 231         | 152                      | 275             | 2.180546253 | 530         |
| 1.201411612                                             | 1.954336557                                 | 1.092225322 | 0.795022034              |                 |             |             |
| 1.088057706                                             |                                             |             |                          |                 |             |             |
| ENSG00000272004                                         | 0                                           | 0           | 0                        | 0               | 31.51492542 |             |
| 14.7707762                                              | 0                                           | 15.42856721 | -6.509152191             | 0.004519627     |             |             |
| 1                                                       | F0704657.1                                  | 1           | 1659325                  | 1662602         | +           | 400         |
| antisense "novel transcript, antisense to SLC35E2B"     |                                             |             |                          |                 |             |             |
| -                                                       | 0                                           | 0           | 0                        | 26              | 16          | 0           |
| 0                                                       | 0                                           | 0           | 3.995404154              | 1.85990606      |             |             |
| ENSG00000275479                                         | 15.3896949                                  | 19.14187889 | 4.652018326              | 0               |             |             |
| 0                                                       | 0                                           | 13.06119737 | 0                        | 6.04943207      |             |             |
| 0.004525433                                             | 1                                           | AC087741.2  | 17                       | 80149627        |             |             |
| 80149798                                                | +                                           | 172         | lincRNA novel transcript |                 |             | -           |
| 16                                                      | 22                                          | 5           | 0                        | 0               | 4.497723488 |             |
| 5.573818615                                             | 1.357024202                                 | 0           | 0                        | 0               |             |             |
| ENSG00000258727                                         | 12.5041271                                  | 25.23247672 | 2.791210996              | 0               |             |             |
| 0                                                       | 0                                           | 13.50927161 | 0                        | 6.098559872     |             |             |
| 0.004526117                                             | 1                                           | AL135999.1  | 14                       | 23561097        |             |             |
| 23568073                                                | +                                           | 3243        | antisense                | uncharacterized |             |             |
| LOC102724814 [Source:NCBI gene;Acc:102724814]           |                                             |             |                          |                 |             |             |
| 3                                                       | 0                                           | 0           | 0                        | 0.193819567     | 0.389681373 |             |
| 0.043183749                                             | 0                                           | 0           | 0                        |                 |             |             |
| ENSG00000061337                                         | 106.7660083                                 | 100.9299069 | 162.8206414              |                 |             |             |

|                                                |                                                  |             |             |                |             |             |
|------------------------------------------------|--------------------------------------------------|-------------|-------------|----------------|-------------|-------------|
| 229.2303843                                    | 208.4833528                                      | 300.9545651 | 123.5055189 |                |             |             |
| 246.2227674                                    | -0.99694559                                      | 0.004588857 | 1           | LZTS1          | 8           |             |
| 20246165                                       | 20303963                                         | -           | 5706        | protein_coding |             |             |
| leucine zipper tumor suppressor 1 [Source:HGNC |                                                  |             |             |                |             |             |
| Symbol;Acc:HGNC:13861]                         | -                                                | 111         | 116         | 175            | 208         | 172         |
| 326                                            | 0.940572827                                      | 0.885900241 | 1.431700963 |                |             |             |
| 2.025553                                       | 1.852866118                                      | 2.656543005 |             |                |             |             |
| ENSG00000279700                                | 45.20722875                                      | 26.10256213 | 22.32968796 |                |             |             |
| 6.612414933                                    | 0                                                | 0           | 31.21315962 | 2.204138311    |             |             |
| 3.835021449                                    | 0.004615648                                      | 1           | AC131212.2  | 12             |             |             |
| 132565071                                      | 132566425                                        | +           | 1355        | TEC            | novel       |             |
| transcript                                     | -                                                | 47          | 30          | 24             | 6           | 0           |
| 1.677103168                                    | 0.964807248                                      | 0.826833344 | 0.246050357 |                |             |             |
| 0                                              | 0                                                |             |             |                |             |             |
| ENSG00000135047                                | 873.3651853                                      | 1047.582827 | 1183.473462 |                |             |             |
| 753.8153023                                    | 675.1466716                                      | 739.4619837 | 1034.807158 |                |             |             |
| 722.8079859                                    | 0.517478047                                      | 0.004625818 | 1           | CTSL           | 9           |             |
| 87725519                                       | 87731393                                         | +           | 2366        | protein_coding |             |             |
| cathepsin L [Source:HGNC Symbol;Acc:HGNC:2537] |                                                  |             |             |                |             |             |
| 1204                                           | 1272                                             | 684         | 557         | 801            | 18.55548561 | 908         |
| 22.17534291                                    | 25.0968033                                       | 16.06398926 | 14.47064253 |                |             |             |
| 15.74159715                                    |                                                  |             |             |                |             |             |
| ENSG00000133318                                | 3124.108064                                      | 3124.476687 | 3238.735159 |                |             |             |
| 4514.075261                                    | 4067.849605                                      | 3575.451015 | 3162.43997  |                |             |             |
| 4052.458627                                    | -0.357541903                                     | 0.004687334 | 0.08596425  |                |             | RTN3        |
| 11                                             | 63681446                                         | 63759891    | +           | 5792           |             |             |
| protein_coding                                 | reticulon 3 [Source:HGNC Symbol;Acc:HGNC:10469]  |             |             |                |             |             |
| 3248                                           | 3591                                             | 3481        | 4096        | 3356           | 3873        | 27.11369359 |
| 27.01751801                                    | 28.05572564                                      | 39.29555603 | 35.61564052 |                |             |             |
| 31.09209328                                    |                                                  |             |             |                |             |             |
| ENSG00000198830                                | 4953.558044                                      | 5308.391051 | 5309.813717 |                |             |             |
| 8574.098029                                    | 6821.769242                                      | 5467.033542 | 5190.587604 |                |             |             |
| 6954.300271                                    | -0.421835476                                     | 0.004725285 | 0.08596425  |                |             | HMGN2       |
| 1                                              | 26472450                                         | 26475972    | +           | 2509           |             |             |
| protein_coding                                 | high mobility group nucleosomal binding domain 2 |             |             |                |             |             |
| [Source:HGNC Symbol;Acc:HGNC:4986]             | -                                                |             | 5150        | 6101           | 5707        |             |
| 7780                                           | 5628                                             | 5922        | 99.24480533 | 105.9641507    |             |             |
| 106.1825735                                    | 172.3022622                                      | 137.8798454 | 109.7485421 |                |             |             |
| ENSG00000166741                                | 911.8394225                                      | 909.2392474 | 896.9091332 |                |             |             |
| 1226.60297                                     | 1189.082378                                      | 1242.591548 | 905.9959344 |                |             |             |
| 1219.425632                                    | -0.428771267                                     | 0.004733257 | 1           | NNMT           | 11          |             |
| 114257787                                      | 114313285                                        | +           | 2919        | protein_coding |             |             |
| nicotinamide N-methyltransferase [Source:HGNC  |                                                  |             |             |                |             |             |
| Symbol;Acc:HGNC:7861]                          | -                                                | 948         | 1045        | 964            | 1113        | 981         |
| 1346                                           | 15.70274069                                      | 15.60058174 | 15.41661315 |                |             |             |
| 21.18717789                                    | 20.65771458                                      | 21.44084924 |             |                |             |             |
| ENSG00000169710                                | 12414.6745                                       | 9642.28645  | 14383.11026 |                |             |             |
| 19804.18272                                    | 17164.72534                                      | 13015.82336 | 12146.6904  |                |             |             |
| 16661.57714                                    | -0.455924246                                     | 0.004752846 | 0.08596425  |                |             | FASN        |
| 17                                             | 82078333                                         | 82098332    | -           | 9364           |             |             |

|                                                 |                                                        |             |             |             |             |                |
|-------------------------------------------------|--------------------------------------------------------|-------------|-------------|-------------|-------------|----------------|
| protein_coding                                  | fatty acid synthase [Source:HGNC Symbol;Acc:HGNC:3594] |             |             |             |             |                |
| -                                               | 12907                                                  | 11082       | 15459       | 17970       | 14161       | 14099          |
| 66.64462392                                     | 51.57216204                                            |             | 77.06656959 |             | 106.6347403 |                |
| 92.95652454                                     | 70.00965277                                            |             |             |             |             |                |
| ENSG00000100201                                 | 6747.419356                                            |             | 6681.385819 |             | 6930.576902 |                |
| 5740.678231                                     | 5312.689159                                            |             | 5570.428976 |             | 6786.460692 |                |
| 5541.265455                                     | 0.292375798                                            |             | 0.004775792 |             | 0.08596425  | DDX17          |
| 22                                              | 38483440                                               |             | 38507660    |             | -           | 9995           |
| protein_coding                                  | DEAD-box helicase 17 [Source:HGNC                      |             |             |             |             |                |
| Symbol;Acc:HGNC:2740]                           | -                                                      |             | 7015        | 7679        | 7449        | 5209           |
| 6034                                            | 33.93486247                                            |             | 33.4796159  |             | 34.79054336 | 4383           |
| 28.95900278                                     | 26.95479495                                            |             | 28.07071827 |             |             |                |
| ENSG00000156471                                 | 3570.409216                                            |             | 3194.953604 |             | 3095.452994 |                |
| 4174.637961                                     | 4126.031006                                            |             | 4085.042794 |             | 3286.938605 |                |
| 4128.570587                                     | -0.3289417                                             |             | 0.004853787 |             | 0.086519931 | PTDSS1         |
| 8                                               | 96261715                                               |             | 96336995    |             | +           | 6295           |
| protein_coding                                  | phosphatidylserine synthase 1 [Source:HGNC             |             |             |             |             |                |
| Symbol;Acc:HGNC:9587]                           | -                                                      |             | 3712        | 3672        | 3327        | 3788           |
| 4425                                            | 28.51106562                                            |             | 25.41941408 |             | 24.67192875 | 3404           |
| 33.43692103                                     | 33.23848168                                            |             | 32.68500522 |             |             |                |
| ENSG00000279861                                 | 32.70310165                                            |             | 1.740170808 |             | 7.443229322 | 0              |
| 0                                               | 0                                                      | 13.96216726 | 0           |             | 6.143979455 |                |
| 0.004898636                                     | 1                                                      | AC073548.1  | 19          |             | 47487638    |                |
| 47489519                                        | -                                                      | 1882        | TEC         | TEC         | -           | 34             |
| 8                                               | 0                                                      | 0           | 0           | 0.873495183 |             | 0.046309381    |
| 0.198434145                                     | 0                                                      | 0           | 0           |             |             |                |
| ENSG00000169064                                 | 0                                                      | 0           | 0.930403665 |             | 16.53103733 |                |
| 4.848450065                                     | 24.00251133                                            |             | 0.310134555 |             |             |                |
| 15.12733291                                     | -5.523408875                                           |             | 0.00493754  |             | 1           | ZBBX           |
| 167240287                                       | 167381346                                              |             | -           |             | 3972        | protein_coding |
| zinc finger B-box domain containing             | [Source:HGNC                                           |             |             |             |             |                |
| Symbol;Acc:HGNC:26245]                          | -                                                      |             | 0           | 0           | 1           | 15             |
| 26                                              | 0                                                      | 0           | 0.011752677 |             | 0.209842795 | 4              |
| 0.061901064                                     | 0.304365292                                            |             |             |             |             |                |
| ENSG00000073605                                 | 93.3000253                                             |             | 100.0598215 |             | 78.15390788 |                |
| 42.98069706                                     | 27.87858788                                            |             | 15.69394972 |             | 90.50458489 |                |
| 28.85107822                                     | 1.654522029                                            |             | 0.005001625 |             | 1           | GSDMB          |
| 39904595                                        | 39919854                                               |             | -           |             | 5905        | protein_coding |
| gasdermin B [Source:HGNC Symbol;Acc:HGNC:23690] | -                                                      |             |             |             |             | 97             |
| 115                                             | 84                                                     | 39          | 23          | 17          | 0.794242365 |                |
| 0.848665478                                     | 0.664057093                                            |             | 0.366992128 |             | 0.239417171 |                |
| 0.133862841                                     |                                                        |             |             |             |             |                |
| ENSG00000005483                                 | 1462.982871                                            |             | 1350.372547 |             | 1497.019497 |                |
| 1218.888486                                     | 802.4184858                                            |             | 1016.414038 |             | 1436.791639 |                |
| 1012.57367                                      | 0.504290512                                            |             | 0.005018109 |             | 1           | KMT2E          |
| 105014179                                       | 105114361                                              |             | +           |             | 9231        | protein_coding |
| lysine methyltransferase 2E [Source:HGNC        |                                                        |             |             |             |             |                |
| Symbol;Acc:HGNC:18541]                          | -                                                      |             | 1521        | 1552        | 1609        | 1106           |
| 1101                                            | 7.966758999                                            |             | 7.326584514 |             | 8.136794148 | 662            |
| 6.657611056                                     | 4.40815238                                             |             | 5.545868736 |             |             |                |

|                                                |                                            |                                    |             |              |             |                |      |
|------------------------------------------------|--------------------------------------------|------------------------------------|-------------|--------------|-------------|----------------|------|
| ENSG00000100519                                | 1456.249879                                |                                    | 1567.893898 |              | 1615.180763 |                |      |
| 2117.074848                                    | 1964.834389                                |                                    | 1946.972938 |              | 1546.441514 |                |      |
| 2009.627392                                    | -0.37785447                                |                                    | 0.005034207 |              | 1           | PSMC6          | 14   |
| 52707172                                       | 52728587                                   |                                    | +           |              | 7482        | protein_coding |      |
| "proteasome 26S subunit, ATPase 6 [Source:HGNC |                                            |                                    |             |              |             |                |      |
| Symbol;Acc:HGNC:9553]"                         | -                                          |                                    | 1514        | 1802         | 1736        | 1921           | 1621 |
| 2109                                           | 9.783841035                                |                                    | 10.4953199  |              | 10.83123685 |                |      |
| 14.26664007                                    | 13.31719231                                |                                    | 13.10659543 |              |             |                |      |
| ENSG00000187889                                | 0                                          | 0                                  | 0           | 29.7558672   |             | 15.75746271    |      |
| 0                                              | 0                                          | 15.17110997                        |             | -6.484202447 |             | 0.005035202    |      |
| 1                                              | FYB2                                       | 1                                  | 56718804    |              | 56819696    |                | -    |
| 4633                                           | protein_coding                             | FYN binding protein 2 [Source:HGNC |             |              |             |                |      |
| Symbol;Acc:HGNC:27295]"                        | -                                          |                                    | 0           | 0            | 0           | 27             | 13   |
| 0                                              | 0                                          | 0                                  | 0           | 0.323827336  |             | 0.172475897    |      |
| 0                                              |                                            |                                    |             |              |             |                |      |
| ENSG00000169045                                | 5750.936611                                |                                    | 4864.647495 |              | 5846.656632 |                |      |
| 4884.370497                                    | 3818.154426                                |                                    | 3976.108319 |              | 5487.413579 |                |      |
| 4226.211081                                    | 0.376705106                                |                                    | 0.005084654 |              | 0.089763698 |                |      |
| HNRNPH1 5                                      | 179614178                                  |                                    | 179634784   |              | -           | 9480           |      |
| protein_coding                                 | heterogeneous nuclear ribonucleoprotein H1 |                                    |             |              |             |                |      |
| [Source:HGNC Symbol;Acc:HGNC:5041]"            | -                                          |                                    |             |              | 5979        | 5591           | 6284 |
| 4432                                           | 3150                                       | 4307                               | 30.49449408 |              | 25.7003923  |                |      |
| 30.94381635                                    | 25.97786515                                |                                    | 20.42441267 |              | 21.12504061 |                |      |
| ENSG00000101412                                | 1092.668338                                |                                    | 1232.911018 |              | 1467.24658  |                |      |
| 1660.818217                                    | 1567.261484                                |                                    | 2049.445198 |              | 1264.275312 |                |      |
| 1759.174966                                    | -0.477082771                               |                                    | 0.005112013 |              | 1           | E2F1           | 20   |
| 33675683                                       | 33686404                                   |                                    | -           |              | 2503        | protein_coding |      |
| E2F transcription factor 1 [Source:HGNC        |                                            |                                    |             |              |             |                |      |
| Symbol;Acc:HGNC:3113]"                         |                                            |                                    |             |              |             |                |      |
| E2F                                            | 1136                                       | 1417                               | 1577        | 1507         | 1293        | 2220           |      |
| 21.94414672                                    | 24.66991189                                |                                    | 29.41148004 |              | 33.45526285 |                |      |
| 31.75301989                                    | 41.24042602                                |                                    |             |              |             |                |      |
| ENSG00000105254                                | 1902.551031                                |                                    | 1850.671655 |              | 1751.950102 |                |      |
| 2323.16178                                     | 2282.407868                                |                                    | 2439.947594 |              | 1835.057596 |                |      |
| 2348.505747                                    | -0.35610937                                |                                    | 0.005131426 |              | 1           | TBCB           | 19   |
| 36114289                                       | 36125947                                   |                                    | +           |              | 3326        | protein_coding |      |
| tubulin folding cofactor B [Source:HGNC        |                                            |                                    |             |              |             |                |      |
| Symbol;Acc:HGNC:1989]"                         |                                            |                                    |             |              |             |                |      |
| -                                              | 1978                                       | 2127                               | 1883        | 2108         | 1883        | 2643           |      |
| 28.75446283                                    | 27.86787429                                |                                    | 26.42859714 |              | 35.21765262 |                |      |
| 34.79969482                                    | 36.94927628                                |                                    |             |              |             |                |      |
| ENSG00000237149                                | 60.59692365                                |                                    | 65.25640532 |              | 41.86816493 |                |      |
| 147.6772668                                    | 115.150689                                 |                                    | 135.7065064 |              | 55.90716463 |                |      |
| 132.8448207                                    | -1.248677923                               |                                    | 0.005153159 |              | 1           | ZNF503-AS2     |      |
| 10                                             | 75401519                                   |                                    | 75408982    |              | +           | 3348           |      |
| antisense                                      | ZNF503 antisense RNA 2 [Source:HGNC        |                                    |             |              |             |                |      |
| Symbol;Acc:HGNC:23525]"                        | -                                          |                                    | 63          | 75           | 45          | 134            | 95   |
| 147                                            | 0.909821754                                |                                    | 0.976190129 |              | 0.627441298 |                |      |
| 2.223982639                                    | 1.744156763                                |                                    | 2.041563552 |              |             |                |      |
| ENSG00000172428                                | 338.5732877                                |                                    | 406.3298838 |              | 347.0405671 |                |      |
| 544.4221628                                    | 621.8137209                                |                                    | 508.6686055 |              | 363.9812462 |                |      |
| 558.3014964                                    | -0.616129557                               |                                    | 0.005188028 |              | 1           | COPS9          | 2    |

|                                                                                           |              |             |             |                                    |       |     |
|-------------------------------------------------------------------------------------------|--------------|-------------|-------------|------------------------------------|-------|-----|
| 240126563                                                                                 | 240136807    | -           | 2039        | protein_coding                     |       |     |
| COP9 signalosome subunit 9 [Source:HGNC Symbol;Acc:HGNC:21314]                            |              |             |             |                                    |       |     |
| -                                                                                         | 352          | 467         | 373         | 494                                | 513   | 551 |
| 8.346927748                                                                               | 9.980636819  | 8.539602228 | 13.46237757 |                                    |       |     |
| 15.46491365                                                                               | 12.56508385  |             |             |                                    |       |     |
| ENSG00000130881                                                                           | 771.4084566  | 789.1674616 | 998.3231327 |                                    |       |     |
| 1184.724342                                                                               | 1506.655858  | 1033.031161 | 852.9663503 |                                    |       |     |
| 1241.470454                                                                               | -0.540748621 | 0.005196236 | 1           | LRP3                               | 19    |     |
| 33177603                                                                                  | 33208867     | +           | 5095        | protein_coding                     |       |     |
| LDL receptor related protein 3 [Source:HGNC Symbol;Acc:HGNC:6695]                         |              |             |             |                                    |       |     |
| -                                                                                         | 802          | 907         | 1073        | 1075                               | 1243  |     |
| 1119                                                                                      | 7.610819048  | 7.757498432 | 9.83108768  |                                    |       |     |
| 11.72401376                                                                               | 14.99596094  | 10.21214368 |             |                                    |       |     |
| ENSG00000177971                                                                           | 750.2476261  | 844.8529275 | 802.0079594 |                                    |       |     |
| 855.2056646                                                                               | 1410.898969  | 1284.134356 | 799.036171  |                                    |       |     |
| 1183.412997                                                                               | -0.566432635 | 0.005202692 | 1           | IMP3                               | 15    |     |
| 75639085                                                                                  | 75648706     | -           | 2565        | protein_coding                     |       |     |
| "IMP3, U3 small nucleolar ribonucleoprotein [Source:HGNC Symbol;Acc:HGNC:14497]"          |              |             |             |                                    |       |     |
| -                                                                                         | 780          | 971         | 862         | 776                                | 1164  |     |
| 1391                                                                                      | 14.70308438  | 16.4964486  | 15.68794045 |                                    |       |     |
| 16.81072313                                                                               | 27.89413966  | 25.21568547 |             |                                    |       |     |
| ENSG00000262943                                                                           | 37.51238131  | 5.220512425 | 7.443229322 |                                    | 0     |     |
| 1.212112516                                                                               | 0            | 16.72537435 | 0.404037505 |                                    |       |     |
| 5.442723096                                                                               | 0.005252442  | 1           | ALOX12P2    | 17                                 |       |     |
| 6853861                                                                                   | 6954107      | +           | 5655        | transcribed_unprocessed_pseudogene |       |     |
| arachidonate 12-lipoxygenase pseudogene 2 [Source:HGNC Symbol;Acc:HGNC:432]               |              |             |             |                                    |       |     |
| -                                                                                         | 39           | 6           | 8           | 0                                  | 1     |     |
| 0                                                                                         | 0.333451914  | 0.046235679 | 0.066039445 | 0                                  |       |     |
| 0.01086963                                                                                | 0            |             |             |                                    |       |     |
| ENSG00000184661                                                                           | 151.9732371  | 250.5845964 | 199.1063844 |                                    |       |     |
| 520.1766414                                                                               | 418.1788181  | 227.1006841 | 200.5547393 |                                    |       |     |
| 388.4853812                                                                               | -0.951984079 | 0.005266297 | 1           | CDCA2                              | 8     |     |
| 25458997                                                                                  | 25507920     | +           | 3908        | protein_coding                     |       |     |
| cell division cycle associated 2 [Source:HGNC Symbol;Acc:HGNC:14623]                      |              |             |             |                                    |       |     |
| -                                                                                         | 158          | 288         | 214         | 472                                | 345   |     |
| 246                                                                                       | 1.954806383  | 3.211415731 | 2.556261353 |                                    |       |     |
| 6.711189273                                                                               | 5.426401202  | 2.926924839 |             |                                    |       |     |
| ENSG00000105835                                                                           | 7220.652474  | 10427.97357 | 7340.884918 |                                    |       |     |
| 6087.830015                                                                               | 6427.832674  | 6427.133996 | 8329.836987 |                                    |       |     |
| 6314.265561                                                                               | 0.399742559  | 0.00530892  | 0.092830263 |                                    | NAMPT |     |
| 7                                                                                         | 106248285    | 106286326   | -           | 9049                               |       |     |
| protein_coding nicotinamide phosphoribosyltransferase [Source:HGNC Symbol;Acc:HGNC:30092] |              |             |             |                                    |       |     |
| -                                                                                         | 7507         | 11985       | 7890        | 5524                               | 5303  |     |
| 6962                                                                                      | 40.11132831  | 57.7159765  | 40.70262801 |                                    |       |     |
| 33.92072495                                                                               | 36.02204788  | 35.77374845 |             |                                    |       |     |
| ENSG00000122432                                                                           | 34.62681351  | 7.830768638 | 53.96341258 |                                    |       |     |
| 1.102069155                                                                               | 0            | 6.462214589 | 32.14033158 | 2.521427915                        |       |     |
| 3.620732227                                                                               | 0.005385611  | 1           | SPATA1      | 1                                  |       |     |
| 84506300                                                                                  | 84566194     | +           | 4280        | protein_coding                     |       |     |
| spermatogenesis associated 1 [Source:HGNC Symbol;Acc:HGNC:14682]                          |              |             |             |                                    |       |     |

|                                                          |              |                  |             |             |             |                |           |
|----------------------------------------------------------|--------------|------------------|-------------|-------------|-------------|----------------|-----------|
| -                                                        | 36           | 9                | 58          | 1           | 0           | 7              |           |
| 0.40668668                                               | 0.091634146  |                  | 0.632601563 |             | 0.012982797 |                | 0         |
| 0.076047561                                              |              |                  |             |             |             |                |           |
| ENSG0000011332                                           | 73.10105075  |                  | 95.70939447 |             | 140.4909534 |                |           |
| 173.0248574                                              | 212.1196904  |                  | 264.0276246 |             | 103.1004662 |                |           |
| 216.3907241                                              | -1.070269504 |                  | 0.005394512 |             | 1           | DPF1           | 19        |
| 38211006                                                 |              | 38229714         | -           |             | 4800        | protein_coding |           |
| double PHD fingers 1 [Source:HGNC Symbol;Acc:HGNC:20225] |              |                  |             |             |             |                |           |
| -                                                        | 76           | 110              | 151         | 157         | 175         | 286            |           |
| 0.765550019                                              | 0.998642502  |                  | 1.468526357 |             | 1.817483424 |                |           |
| 2.241011946                                              | 2.770485069  |                  |             |             |             |                |           |
| ENSG00000280388                                          | 5.771135586  |                  | 10.44102485 |             | 21.3992843  |                | 0         |
| 0                                                        | 0            | 12.53714825      | 0           |             | 5.990104713 |                |           |
| 0.005432149                                              | 1            | AC006330.1       | 7           |             | 76043977    |                |           |
| 76045963                                                 | -            | 1987             | TEC         | TEC         | -           | 6              | 12        |
| 23                                                       | 0            | 0                | 0           | 0.146000586 | 0.263173391 |                |           |
| 0.540351056                                              | 0            | 0                | 0           |             |             |                |           |
| ENSG00000265511                                          | 21.16083048  |                  | 24.36239132 |             | 64.1978529  |                |           |
| 8.816553243                                              | 0            | 0                | 36.57369157 |             | 2.938851081 |                |           |
| 3.64660045                                               | 0.005441768  |                  | 1           | AC020558.2  | 17          |                |           |
| 17507351                                                 | 17508308     |                  | +           | 795         | antisense   |                | novel     |
| transcript                                               | -            | 22               | 28          | 69          | 8           | 0              | 0         |
| 1.338002019                                              | 1.534791907  |                  | 4.051613392 |             | 0.559158462 |                |           |
| 0                                                        | 0            |                  |             |             |             |                |           |
| ENSG00000137959                                          | 612.702228   |                  | 1121.540086 |             | 833.641684  |                |           |
| 501.4414657                                              | 527.2689446  |                  | 606.5249979 |             | 855.9613327 |                |           |
| 545.0784694                                              | 0.650952804  |                  | 0.005462078 |             | 1           | IFI44L         | 1         |
| 78619922                                                 | 78646145     |                  | +           |             | 10240       | protein_coding |           |
| interferon induced protein 44 like [Source:HGNC          |              |                  |             |             |             |                |           |
| Symbol;Acc:HGNC:17817]                                   | -            | 637              | 1289        |             | 896         | 455            | 435       |
| 657                                                      | 3.007742775  |                  | 5.485441129 |             | 4.084642849 |                |           |
| 2.469013609                                              | 2.611179097  |                  | 2.983296585 |             |             |                |           |
| ENSG00000202078                                          | 21.16083048  |                  | 1.740170808 |             | 16.74726597 |                | 0         |
| 0                                                        | 0            | 13.21608909      | 0           |             | 6.065027297 |                |           |
| 0.005469012                                              | 1            | RF00019          | 1           |             | 160326104   |                | 160326216 |
| -                                                        | 113          | misc_RNA         |             |             | -           | 22             | 2         |
| 18                                                       | 0            | 0                | 0           | 9.413377034 | 0.77127659  |                |           |
| 7.436012265                                              | 0            | 0                | 0           |             |             |                |           |
| ENSG00000285744                                          | 69.25362703  |                  | 75.69743017 |             | 40.93776127 |                |           |
| 5.510345777                                              | 0            | 23.07933782      | 61.96293949 |             | 9.529894532 |                |           |
| 2.675844734                                              | 0.005477744  |                  | 1           | AC083837.2  | 8           |                |           |
| 78805293                                                 | 78956082     |                  | +           |             | 2921        |                |           |
| bidirectional_promoter_lncRNA                            |              | novel transcript |             |             | -           |                | 72        |
| 87                                                       | 44           | 5                | 0           | 25          | 1.191796638 |                |           |
| 1.297915125                                              | 0.703181045  |                  | 0.095115324 |             | 0           | 0.397960044    |           |
| ENSG00000128585                                          | 1525.503506  |                  | 1203.328114 |             | 1321.173205 |                |           |
| 1044.761559                                              | 869.0846742  |                  | 1020.106732 |             | 1350.001608 |                |           |
| 977.9843217                                              | 0.464410398  |                  | 0.005606722 |             | 1           | MKLN1          | 7         |
| 131110096                                                | 131496636    |                  | +           |             | 12878       | protein_coding |           |
| muskelin 1 [Source:HGNC Symbol;Acc:HGNC:7109]            |              |                  |             |             | -           |                | 1586      |

|  |                                                                    |              |     |             |             |             |                |     |
|--|--------------------------------------------------------------------|--------------|-----|-------------|-------------|-------------|----------------|-----|
|  | 1383                                                               | 1420         | 948 | 717         | 1105        | 5.95464642  |                |     |
|  | 4.679854568                                                        | 5.147376784  |     | 4.090458212 |             | 3.422300141 |                |     |
|  | 3.989742577                                                        |              |     |             |             |             |                |     |
|  | ENSG00000180998                                                    | 22.12268641  |     | 20.8820497  |             | 40.93776127 |                |     |
|  | 85.96139412                                                        | 90.90843872  |     | 78.46974858 |             | 27.98083246 |                |     |
|  | 85.11319381                                                        | -1.605024149 |     | 0.00565584  |             | 1           | GPR137C        | 14  |
|  | 52553148                                                           | 52637713     |     | +           |             | 6193        | protein_coding |     |
|  | G protein-coupled receptor 137C [Source:HGNC                       |              |     |             |             |             |                |     |
|  | Symbol;Acc:HGNC:25445]                                             | -            |     | 23          | 24          | 44          | 78             | 75  |
|  | 85                                                                 | 0.179567598  |     | 0.168876321 |             | 0.331663464 |                |     |
|  | 0.699850966                                                        | 0.744402021  |     | 0.638188338 |             |             |                |     |
|  | ENSG00000271122                                                    | 1187.892075  |     | 1108.488805 |             | 1020.652821 |                |     |
|  | 718.5490893                                                        | 892.114812   |     | 774.5425772 |             | 1105.6779   |                |     |
|  | 795.0688262                                                        | 0.476237426  |     | 0.005657311 |             | 1           | AC018647.2     |     |
|  | 7                                                                  | 35695214     |     | 35699413    |             | +           | 4200           |     |
|  | antisense uncharacterized LOC101930085 [Source:NCBI                |              |     |             |             |             |                |     |
|  | gene;Acc:101930085]                                                | -            |     | 1235        | 1274        | 1097        | 652            | 736 |
|  | 839                                                                | 14.21735749  |     | 13.2183953  |             | 12.19279784 |                |     |
|  | 8.62601778                                                         | 10.77149252  |     | 9.288459431 |             |             |                |     |
|  | ENSG00000261783                                                    | 39.43609317  |     | 20.0119643  |             | 1.86080733  |                | 0   |
|  | 1.212112516                                                        | 0.923173513  |     | 20.43628827 |             | 0.71176201  |                |     |
|  | 4.846562116                                                        | 0.005695101  |     | 1           |             | AC009054.2  |                | 16  |
|  | 75379818                                                           | 75381260     |     | -           |             | 374         | sense_intronic |     |
|  | "novel transcript, sense intronic to CFDP1"                        |              |     |             |             |             |                |     |
|  | 23                                                                 | 2            | 0   | 1           | 1           | 5.300458896 |                | 41  |
|  | 2.679876816                                                        | 0.249634399  |     | 0           | 0.164352289 | 0.124325271 |                |     |
|  | ENSG00000233968                                                    | 7.694847448  |     | 5.220512425 |             | 7.443229322 |                |     |
|  | 66.12414933                                                        | 32.72703794  |     | 20.30981728 |             | 6.786196398 |                |     |
|  | 39.72033485                                                        | -2.54964773  |     | 0.005719731 |             | 1           | AL157895.1     |     |
|  | 10                                                                 | 19710328     |     | 19728550    |             | -           | 2151           |     |
|  | antisense uncharacterized LOC101928834 [Source:NCBI                |              |     |             |             |             |                |     |
|  | gene;Acc:101928834]                                                | -            |     | 8           | 6           | 8           | 60             | 27  |
|  | 22                                                                 | 0.1798253    |     | 0.121554051 |             | 0.173618345 |                |     |
|  | 1.549968541                                                        | 0.771561794  |     | 0.475568728 |             |             |                |     |
|  | ENSG00000285531                                                    | 43.28351689  |     | 21.75213511 |             | 37.21614661 |                |     |
|  | 4.408276622                                                        | 4.848450065  |     | 6.462214589 |             | 34.08393287 |                |     |
|  | 5.239647092                                                        | 2.694829658  |     | 0.005756959 |             | 1           | Z83840.1       |     |
|  | 22                                                                 | 41676745     |     | 41677125    |             | -           | 381            |     |
|  | processed_pseudogene "LLP homolog, long-term synaptic facilitation |              |     |             |             |             |                |     |
|  | ( LLPH) pseudogene"                                                | -            |     | 45          | 25          | 40          | 4              | 4   |
|  | 7                                                                  | 5.710692223  |     | 2.859391559 |             | 4.900958798 |                |     |
|  | 0.583373986                                                        | 0.645330774  |     | 0.85428756  |             |             |                |     |
|  | ENSG00000198498                                                    | 800.2641345  |     | 823.1007924 |             | 834.5720877 |                |     |
|  | 613.8525196                                                        | 590.2987954  |     | 540.0565049 |             | 819.3123382 |                |     |
|  | 581.4026067                                                        | 0.495410933  |     | 0.005776788 |             | 1           | TMA16          | 4   |
|  | 163494442                                                          | 163520539    |     | +           |             | 3513        | protein_coding |     |
|  | translation machinery associated 16 homolog [Source:HGNC           |              |     |             |             |             |                |     |
|  | Symbol;Acc:HGNC:25638]                                             | -            |     | 832         | 946         | 897         | 557            | 487 |
|  | 585                                                                | 11.45107853  |     | 11.73468901 |             | 11.91956288 |                |     |
|  | 8.810267383                                                        | 8.52114924   |     | 7.742990643 |             |             |                |     |

|                            |                                                    |                 |                               |                |                       |
|----------------------------|----------------------------------------------------|-----------------|-------------------------------|----------------|-----------------------|
| ENSG00000099341            | 5989.476882                                        | 6030.561937     | 5749.894651                   |                |                       |
| 6469.145942                | 7999.942608                                        | 7777.736845     | 5923.311157                   |                |                       |
| 7415.608465                | -0.324155876                                       | 0.005801891     | 0.100493139                   | PSMD8          |                       |
| 19                         | 38374536                                           | 38383824        | + 3105                        |                |                       |
| protein_coding             | "proteasome 26S subunit, non-ATPase 8 [Source:HGNC |                 |                               |                |                       |
| Symbol;Acc:HGNC:9566]"     | -                                                  | 6227 6931       | 6180 5870                     | 6600           |                       |
| 8425                       | 96.96577607                                        | 97.27313033     | 92.91223484                   |                |                       |
| 105.0481819                | 130.6561002                                        | 126.1651252     |                               |                |                       |
| ENSG00000258857            | 8.656703379                                        | 16.53162268     | 11.16484398                   | 0              |                       |
| 0                          | 0                                                  | 12.11772335     | 0                             | 5.941419334    |                       |
| 0.005828868                | 1                                                  | AL359397.1      | 14                            | 50397013       |                       |
| 50398345                   | +                                                  | 501             | lincRNA novel transcript      | -              |                       |
| 9                          | 19                                                 | 12              | 0                             | 0              | 0.86857235            |
| 1.652625588                | 1.118122935                                        | 0               | 0                             | 0              |                       |
| ENSG00000214460            | 0                                                  | 0               | 0                             | 23.03013781    |                       |
| 20.30981728                | 0                                                  | 14.4466517      | -6.415718597                  | 0.005835549    |                       |
| 1                          | TPT1P6                                             | 6               | 85427453                      | 85427966       | -                     |
| 514                        | processed_pseudogene                               | "tumor protein, |                               |                |                       |
| translationally-controlled | 1                                                  | pseudogene      | 6                             | [Source:HGNC   |                       |
| Symbol;Acc:HGNC:49297]"    | -                                                  | 0               | 0                             | 0              | 0 19                  |
| 22                         | 0                                                  | 0               | 0                             | 2.272154413    |                       |
| 1.990171854                |                                                    |                 |                               |                |                       |
| ENSG00000183160            | 600.1981009                                        | 587.3076479     | 695.9419416                   |                |                       |
| 1182.520204                | 1107.87084                                         | 644.3751119     | 627.8158968                   |                |                       |
| 978.2553852                | -0.638951596                                       | 0.005840341     | 1                             | TMEM119        | 12                    |
| 108589846                  | 108598320                                          | -               | 3189                          | protein_coding |                       |
| transmembrane protein      | 119                                                | [Source:HGNC    | Symbol;Acc:HGNC:27884]"       |                |                       |
| -                          | 624                                                | 675             | 748                           | 1073           | 914 698               |
| 9.460874617                | 9.223756966                                        | 10.94947041     | 18.69636794                   |                |                       |
| 17.6172873                 | 10.17728465                                        |                 |                               |                |                       |
| ENSG00000221978            | 3343.411216                                        | 2565.881857     | 3650.903982                   |                |                       |
| 2152.341061                | 2364.831519                                        | 2603.349306     | 3186.732352                   |                |                       |
| 2373.507295                | 0.424730038                                        | 0.005859761     | 0.100546933                   | CCNL2          |                       |
| 1                          | 1385711                                            | 1399328         | -                             | 6850           | protein_coding cyclin |
| L2 [Source:HGNC            | Symbol;Acc:HGNC:20570]"                            | -               | 3476                          | 2949           | 3924                  |
| 1953                       | 1951                                               | 2820            | 24.53524578                   | 18.76043045    |                       |
| 26.74141988                | 15.84249999                                        | 17.50709378     | 19.14209887                   |                |                       |
| ENSG00000221038            | 0                                                  | 0               | 0                             | 15.42896818    | 0                     |
| 27.69520538                | 0                                                  | 14.37472452     | -6.411549563                  | 0.005928422    |                       |
| 1                          | RNU6ATAC7P                                         | 17              | 31563768                      | 31563894       |                       |
| -                          | 127                                                | snRNA           | "RNA, U6atac small nuclear 7, |                |                       |
| pseudogene [Source:HGNC    | Symbol;Acc:HGNC:46906]"                            | -               | 0                             | 0              | 0                     |
| 0                          | 14                                                 | 0               | 30                            | 0              | 0                     |
| 6.125426857                | 0                                                  | 10.9836972      |                               |                |                       |
| ENSG00000104833            | 42.32166096                                        | 6.09059783      | 0                             | 0              | 0                     |
| 0                          | 16.1374196                                         | 0               | 6.353272785                   | 0.006055967    |                       |
| 1                          | TUBB4A                                             | 19              | 6494319                       | 6502848        | - 3466                |
| protein_coding             | tubulin beta 4A                                    | class IVa       | [Source:HGNC                  |                |                       |
| Symbol;Acc:HGNC:20774]"    | -                                                  | 44              | 7                             | 0              | 0 0                   |
| 0                          | 0.61379781                                         | 0.088009201     | 0                             | 0              | 0                     |



|                                                                 |              |             |             |            |                |             |             |
|-----------------------------------------------------------------|--------------|-------------|-------------|------------|----------------|-------------|-------------|
| 0                                                               |              |             |             |            |                |             |             |
| ENSG0000011304                                                  | 10692.95238  |             | 8178.8028   |            | 10207.45861    |             |             |
| 11710.58685                                                     | 12496.88004  |             | 12388.98854 |            | 9693.071265    |             |             |
| 12198.81848                                                     | -0.331775678 |             | 0.006118399 |            | 0.103132857    |             | PTBP1       |
| 19                                                              | 797075       | 812327      | +           | 6883       | protein_coding |             |             |
| polypyrimidine tract binding protein 1 [Source:HGNC             |              |             |             |            |                |             |             |
| Symbol;Acc:HGNC:9583]                                           | -            |             | 11117       | 9400       | 10971          | 10626       | 10310       |
| 13420                                                           | 78.09281042  |             | 59.51256678 |            | 74.40711765    |             |             |
| 85.783564                                                       | 92.07214392  |             | 90.65792287 |            |                |             |             |
| ENSG00000164032                                                 | 3447.291657  |             | 3553.428791 |            | 3964.450017    |             |             |
| 5177.520892                                                     | 4706.632901  |             | 4116.430693 |            | 3655.056822    |             |             |
| 4666.861495                                                     | -0.352366501 |             | 0.006133078 |            | 0.103132857    |             | H2AFZ       |
| 4                                                               | 99948086     |             | 99950388    |            | -              | 2303        |             |
| protein_coding H2A histone family member Z [Source:HGNC         |              |             |             |            |                |             |             |
| Symbol;Acc:HGNC:4741]                                           | -            |             | 3584        | 4084       | 4261           | 4698        | 3883        |
| 4459                                                            | 75.2445899   |             | 77.2770248  |            | 86.37014169    |             |             |
| 113.352504                                                      | 103.638427   |             | 90.0273678  |            |                |             |             |
| ENSG00000278389                                                 | 26.93196607  |             | 24.36239132 |            | 7.443229322    |             |             |
| 2.204138311                                                     | 0            | 0           | 19.57919557 |            | 0.73471277     |             |             |
| 4.756454953                                                     | 0.006134389  |             | 1           | AC099518.6 | 16             |             |             |
| 19111035                                                        | 19111484     |             | -           | 450        | lincRNA novel  |             |             |
| transcript                                                      |              |             |             |            |                |             |             |
|                                                                 | -            | 28          | 28          | 8          | 2              | 0           | 0           |
| 3.008477266                                                     | 2.711465702  |             | 0.82989569  |            | 0.246961654    |             |             |
| 0                                                               | 0            |             |             |            |                |             |             |
| ENSG00000075624                                                 | 148281.634   |             | 166537.8267 |            | 147335.0028    |             |             |
| 204114.2283                                                     | 180231.4343  |             | 177990.6228 |            | 154051.4878    |             |             |
| 187445.4284                                                     | -0.283054059 |             | 0.006178984 |            | 0.103132857    |             | ACTB        |
| 7                                                               | 5527147      | 5563784     | -           | 3519       | protein_coding |             | actin       |
| beta [Source:HGNC Symbol;Acc:HGNC:132]                          |              |             |             |            |                |             |             |
|                                                                 | -            |             |             |            | 154162         | 191404      | 158356      |
| 185210                                                          | 148692       | 192803      | 2118.162552 |            | 2370.22918     |             |             |
| 2100.686731                                                     | 2924.537595  |             | 2597.261611 |            | 2547.566554    |             |             |
| ENSG00000243406                                                 | 46.16908469  |             | 30.45298915 |            | 48.38099059    |             |             |
| 2.204138311                                                     | 0            | 12.92442918 | 41.66768814 |            | 5.04285583     |             |             |
| 3.008856692                                                     | 0.006193036  |             | 1           | MRPS31P5   |                | 13          |             |
| 52167709                                                        | 52194465     |             | -           | 3873       |                |             |             |
| transcribed_unprocessed_pseudogene mitochondrial ribosomal      |              |             |             |            |                |             |             |
| protein S31 pseudogene 5 [Source:HGNC Symbol;Acc:HGNC:39253]    |              |             |             |            |                |             |             |
|                                                                 | 48           | 35          | 52          | 2          | 0              | 14          | 0.599231944 |
| 0.393803113                                                     | 0.626760881  |             | 0.028694228 |            | 0              |             |             |
| 0.168078265                                                     |              |             |             |            |                |             |             |
| ENSG00000213553                                                 | 1211.938473  |             | 1377.345195 |            | 1709.151533    |             |             |
| 1532.978195                                                     | 2293.316881  |             | 2328.243599 |            | 1432.811734    |             |             |
| 2051.512892                                                     | -0.517909272 |             | 0.006226033 |            | 1              | RPLP0P6     | 2           |
| 38481851                                                        | 38482804     |             | +           | 954        |                |             |             |
| processed_pseudogene ribosomal protein lateral stalk subunit P0 |              |             |             |            |                |             |             |
| pseudogene 6 [Source:HGNC Symbol;Acc:HGNC:36404]                |              |             |             |            |                |             |             |
|                                                                 | 1583         | 1837        | 1391        | 1892       | 2522           | 63.85918725 | 1260        |
| 72.30879728                                                     | 89.88905556  |             | 81.01973138 |            | 121.9046067    |             |             |
| 122.9214644                                                     |              |             |             |            |                |             |             |
| ENSG00000277791                                                 | 2629.714115  |             | 2291.804955 |            | 2237.620815    |             |             |

|                                       |                                        |                                |                           |                |
|---------------------------------------|----------------------------------------|--------------------------------|---------------------------|----------------|
| 2852.154974                           | 2917.554827                            | 3550.52533                     | 2386.379962               |                |
| 3106.745044                           | -0.381016197                           | 0.006383332                    | 0.104696918               | PSMB3          |
| 17                                    | 38752736                               | 38764231                       | + 1179                    |                |
| protein_coding                        | proteasome subunit beta 3 [Source:HGNC |                                |                           |                |
| Symbol;Acc:HGNC:9540]                 | -                                      | 2734 2634                      | 2405 2588                 | 2407           |
| 3846                                  | 112.1207313                            | 97.35551607                    | 95.22419533               |                |
| 121.9726643                           | 125.490152                             | 151.6793619                    |                           |                |
| ENSG00000171314                       | 7043.670982                            | 7791.614795                    | 8487.142234               |                |
| 9383.016789                           | 9930.837846                            | 9427.447912                    | 7774.14267                |                |
| 9580.434182                           | -0.301346569                           | 0.00638674                     | 0.104696918               | PGAM1          |
| 10                                    | 97426160                               | 97433441                       | + 2568                    |                |
| protein_coding                        | phosphoglycerate mutase 1 [Source:HGNC |                                |                           |                |
| Symbol;Acc:HGNC:8888]                 | -                                      | 7323 8955                      | 9122 8514                 | 8193           |
| 10212                                 | 137.8780813                            | 151.9599593                    | 165.8215935               |                |
| 184.2258929                           | 196.1079933                            | 184.9042123                    |                           |                |
| ENSG00000183929                       | 0 0                                    | 0 20.93931395                  | 21.81802529               |                |
| 0                                     | 0 14.25244642                          | -6.393432747                   | 0.00644628                |                |
| 1                                     | DUSP5P1 1                              | 228650241                      | 228651379                 | +              |
| 1139                                  | processed_pseudogene                   | dual specificity phosphatase 5 |                           |                |
| pseudogene 1 [Source:HGNC             | Symbol;Acc:HGNC:32020]                 | -                              | 0                         |                |
| 0                                     | 0 19 18                                | 0 0                            | 0 0                       |                |
| 0.92691929                            | 0.971395621                            | 0                              |                           |                |
| ENSG00000070950                       | 1185.006507                            | 1206.808456                    | 1042.982509               |                |
| 1556.121647                           | 1471.504595                            | 1509.388693                    | 1144.93249                |                |
| 1512.338312                           | -0.401513441                           | 0.006558111                    | 1 RAD18                   | 3              |
| 8775402                               | 8963773 -                              | 6983                           | protein_coding "RAD18, E3 |                |
| ubiquitin protein ligase [Source:HGNC | Symbol;Acc:HGNC:18278]"                | -                              |                           |                |
| 1232                                  | 1387 1121 1412                         | 1214 1635                      | 8.530409548               |                |
| 8.655517061                           | 7.493929557                            | 11.23581807                    | 10.68621739               |                |
| 10.88696265                           |                                        |                                |                           |                |
| ENSG00000151914                       | 6570.437864                            | 4416.553512                    | 6209.514061               |                |
| 4948.290508                           | 4012.092429                            | 3785.934576                    | 5732.168479               |                |
| 4248.772504                           | 0.432032642                            | 0.006573207                    | 0.106279634               | DST            |
| 6                                     | 56457987                               | 56954628                       | - 42341                   |                |
| protein_coding                        | dystonin [Source:HGNC                  | Symbol;Acc:HGNC:1090]          | -                         |                |
| 6831                                  | 5076 6674 4490                         | 3310 4101                      | 7.80053502                |                |
| 5.224191645                           | 7.358192194                            | 5.892468557                    | 4.8052307                 |                |
| 4.503598611                           |                                        |                                |                           |                |
| ENSG00000167522                       | 14917.42363                            | 11150.14446                    | 12300.86686               |                |
| 9336.729885                           | 9487.204665                            | 11185.17028                    | 12789.47832               |                |
| 10003.03494                           | 0.354374701                            | 0.006599062                    | 0.106279634               |                |
| ANKRD11 16                            | 89267619                               | 89490561                       | - 19538                   |                |
| protein_coding                        | ankyrin repeat domain 11 [Source:HGNC  |                                |                           |                |
| Symbol;Acc:HGNC:21316]                | -                                      | 15509 12815                    | 13221 8472                | 7827           |
| 12116                                 | 38.37999441                            | 28.58229538                    | 31.58858962               |                |
| 24.09449817                           | 24.62422602                            | 28.83435078                    |                           |                |
| ENSG00000160062                       | 38.47423724                            | 99.18973608                    | 112.5788435               |                |
| 271.1090122                           | 175.7563149                            | 148.6309355                    | 83.41427227               |                |
| 198.4987542                           | -1.249187189                           | 0.006635559                    | 1 ZBTB8A                  | 1              |
| 32539427                              | 32605939                               | +                              | 7075                      | protein_coding |

zinc finger and BTB domain containing 8A [Source:HGNC  
Symbol;Acc:HGNC:24172] ZBTB 40 114 121 246 145  
161 0.273359873 0.702161487 0.798371384  
1.932060433 1.259763202 1.058109101  
ENSG00000033050 592.5032535 677.7965299 668.9602353  
824.3477283 837.5697488 1150.274197 646.4200062  
937.3972246 -0.537001305 0.006642555 1 ABCF2 7  
151212490 151227230 - 4177 protein\_coding  
ATP binding cassette subfamily F member 2 [Source:HGNC  
Symbol;Acc:HGNC:71] - 616 779 719 748 691  
1246 7.130458448 8.127024709 8.035454586  
9.950597656 10.16859458 13.87025946  
ENSG000000227436 25.97011014 0 19.53847697 0 0  
0 15.16952903 0 6.264039799 0.006661033  
1 FCF1P1 7 23619333 23622826 +  
571 processed\_pseudogene FCF1 pseudogene 1 [Source:HGNC  
Symbol;Acc:HGNC:44613] - 27 0 21 0 0  
0 2.286277132 0 1.716837625 0 0  
0  
ENSG000000271550 26.93196607 10.44102485 17.67766964 0  
0 1.846347025 18.35022019 0.615449008  
4.786427338 0.006705223 1 BNIP3P1 7  
64678954 64687393 - 563 processed\_pseudogene  
BCL2 interacting protein 3 pseudogene 11 [Source:HGNC  
Symbol;Acc:HGNC:49724] - 28 12 19 0 0  
2 2.404644351 0.928819766 1.575401454 0  
0 0.165178158  
ENSG000000106086 796.4167108 736.9623374 674.5426573  
598.4235514 455.7543061 436.6610715 735.9739018  
496.9463097 0.566900983 0.006706638 1 PLEKHA8 7  
30027404 30130483 + 10886 protein\_coding  
pleckstrin homology domain containing A8 [Source:HGNC  
Symbol;Acc:HGNC:30037] - 828 847 725 543 376  
473 3.677589267 3.390577519 3.108964138  
2.771682905 2.123082522 2.020337053  
ENSG000000120437 516.5166349 421.1213357 529.3996855  
873.9408402 938.1750876 516.0539936 489.012552  
776.0566405 -0.665327036 0.006748619 1 ACAT2 6  
159760328 159779055 + 4299 protein\_coding  
acetyl-CoA acetyltransferase 2 [Source:HGNC  
Symbol;Acc:HGNC:94] - 537 484 569 793 774  
559 6.03959834 4.906101335 6.178611055  
10.24985651 11.06676979 6.046100765  
ENSG000000224543 3.847423724 10.44102485 42.7985686  
1.102069155 0 0.923173513 19.02900572 0.675080889  
4.777728422 0.006748754 1 SNRPGP15 19  
14489388 14489609 + 222  
processed\_pseudogene small nuclear ribonucleoprotein polypeptide G  
pseudogene 15 [Source:HGNC Symbol;Acc:HGNC:49371] - 4  
12 46 1 0 1 0.871180676

|                                                                          |              |             |             |                     |                |             |
|--------------------------------------------------------------------------|--------------|-------------|-------------|---------------------|----------------|-------------|
| 2.355520398                                                              | 9.67277071   | 0.250298974 | 0           | 0.209448881         |                |             |
| ENSG00000106399                                                          | 719.4682363  | 875.3059167 | 906.2131699 |                     |                |             |
| 1272.889875                                                              | 1164.840128  | 1039.493375 | 833.662441  |                     |                |             |
| 1159.074459                                                              | -0.474889141 | 0.006752474 | 1           | RPA3                | 7              |             |
| 7636518                                                                  | 7718607      | -           | 3232        | protein_coding      | replication    |             |
| protein A3 [Source:HGNC Symbol;Acc:HGNC:10291]                           | -            | 748         | 1006        |                     |                |             |
| 974                                                                      | 1155         | 961         | 1126        | 11.19003545         | 13.56392021    |             |
| 14.06804149                                                              | 19.85741333  | 18.27676786 | 16.19936745 |                     |                |             |
| ENSG00000203588                                                          | 13.46598303  | 11.31111026 | 10.23444032 | 0                   |                |             |
| 0                                                                        | 0            | 11.6705112  | 0           | 5.886540439         |                |             |
| 0.00681291                                                               | 1            | IGBP1-AS1   | X           | 70163842            |                |             |
| 70165206                                                                 | -            | 542         | antisense   | IGBP1 antisense RNA | 1              |             |
| [Source:HGNC Symbol;Acc:HGNC:40295]                                      | -            | 14          | 13          | 11                  |                |             |
| 0                                                                        | 0            | 0           | 1.248906614 | 1.045207852         |                |             |
| 0.947413207                                                              | 0            | 0           | 0           |                     |                |             |
| ENSG00000134057                                                          | 841.6239396  | 912.7195891 | 988.0886924 |                     |                |             |
| 1471.262322                                                              | 1138.173653  | 1177.046229 | 914.1440737 |                     |                |             |
| 1262.160735                                                              | -0.465318828 | 0.006845881 | 1           | CCNB1               | 5              |             |
| 69167010                                                                 | 69178245     | +           | 2558        | protein_coding      |                |             |
| cyclin B1 [Source:HGNC Symbol;Acc:HGNC:1579]                             | -            | 875         |             |                     |                |             |
| 1049                                                                     | 1062         | 1335        | 939         | 1275                | 16.53898028    |             |
| 17.87037005                                                              | 19.3807247   | 28.99965086 | 22.56380887 |                     |                |             |
| 23.17611637                                                              |              |             |             |                     |                |             |
| ENSG00000002822                                                          | 3147.192606  | 2797.324575 | 2897.277013 |                     |                |             |
| 3157.42813                                                               | 3799.972739  | 4926.977037 | 2947.264731 |                     |                |             |
| 3961.459302                                                              | -0.427027694 | 0.006885752 | 0.109932521 | MAD1L1              |                |             |
| 7                                                                        | 1815793      | 2233243     | -           | 7230                | protein_coding |             |
| mitotic arrest deficient 1 like 1 [Source:HGNC Symbol;Acc:HGNC:6762]     | -            | 3272        | 3215        | 3114                | 2865           | 3135        |
|                                                                          |              |             |             |                     |                | 5337        |
| 21.88145587                                                              | 19.3776576   | 20.10603095 | 22.01903961 |                     |                |             |
| 26.65303122                                                              | 34.32337013  |             |             |                     |                |             |
| ENSG00000138629                                                          | 2002.584048  | 1528.740055 | 1752.880505 |                     |                |             |
| 1919.804469                                                              | 2584.223885  | 2721.515516 | 1761.401536 |                     |                |             |
| 2408.514623                                                              | -0.451737643 | 0.006933665 | 1           | UBL7                | 15             |             |
| 74445977                                                                 | 74461182     | -           | 1885        | protein_coding      |                |             |
| ubiquitin like 7 [Source:HGNC Symbol;Acc:HGNC:28221]                     | -            |             |             |                     |                |             |
| 2082                                                                     | 1757         | 1884        | 1742        | 2132                | 2948           | 53.40360649 |
| 40.6180439                                                               | 46.65686776  | 51.35099224 | 69.52215186 |                     |                |             |
| 72.71887354                                                              |              |             |             |                     |                |             |
| ENSG00000134278                                                          | 1061.888948  | 1024.090521 | 839.224106  |                     |                |             |
| 731.7739192                                                              | 635.1469585  | 714.5362989 | 975.0678582 |                     |                |             |
| 693.8190589                                                              | 0.490528195  | 0.006936551 | 1           | SPIRE1              | 18             |             |
| 12446512                                                                 | 12658134     | -           | 6532        | protein_coding      |                |             |
| spire type actin nucleation factor 1 [Source:HGNC Symbol;Acc:HGNC:30622] | -            | 1104        | 1177        | 902                 | 664            | 524         |
| 774                                                                      | 8.17192014   | 7.852155373 | 6.446238911 |                     |                |             |
| 5.648510585                                                              | 4.930971258  | 5.509672728 |             |                     |                |             |
| ENSG00000100739                                                          | 18.27526269  | 9.570939447 | 25.12089896 |                     |                |             |
| 37.47035128                                                              | 135.7566018  | 42.46598159 | 17.65570036 |                     |                |             |
| 71.8976449                                                               | -2.024707017 | 0.006942041 | 1           | BDKRB1              | 14             |             |

|                                                                                                        |                                                                                                    |             |                |                  |             |      |   |
|--------------------------------------------------------------------------------------------------------|----------------------------------------------------------------------------------------------------|-------------|----------------|------------------|-------------|------|---|
| 96255824                                                                                               | 96268967                                                                                           | +           | 2758           | protein_coding   |             |      |   |
| bradykinin receptor B1 [Source:HGNC Symbol;Acc:HGNC:1029]                                              |                                                                                                    |             |                |                  |             |      |   |
| -                                                                                                      | 19                                                                                                 | 11          | 27             | 34               | 112         | 46   |   |
| 0.333089203                                                                                            | 0.173802901                                                                                        | 0.456999303 | 0.685009665    |                  |             |      |   |
| 2.496152537                                                                                            | 0.775522831                                                                                        |             |                |                  |             |      |   |
| ENSG00000102977                                                                                        | 1246.565287                                                                                        | 1271.194776 | 1119.275609    |                  |             |      |   |
| 1528.569919                                                                                            | 1656.95781                                                                                         | 1584.165748 | 1212.345224    |                  |             |      |   |
| 1589.897825                                                                                            | -0.390974429                                                                                       | 0.006945586 | 1              | ACD              | 16          |      |   |
| 67657512                                                                                               | 67660815                                                                                           | -           | 3223           | protein_coding   |             |      |   |
| "ACD, shelterin complex subunit and telomerase recruitment factor [Source:HGNC Symbol;Acc:HGNC:25070]" |                                                                                                    |             |                |                  |             |      |   |
| 1203                                                                                                   | 1387                                                                                               | 1367        | 1716           | 19.44222266      | 19.75370247 |      |   |
| 17.42414023                                                                                            | 23.91267708                                                                                        | 26.07087271 | 24.75642878    |                  |             |      |   |
| ENSG00000267672                                                                                        | 10.58041524                                                                                        | 13.05128106 | 11.16484398    | 0                |             |      |   |
| 0                                                                                                      | 0                                                                                                  | 11.59884676 | 0              | 5.877940186      |             |      |   |
| 0.006999542                                                                                            | 1                                                                                                  | AC010632.2  | 19             | 37091341         |             |      |   |
| 37092564                                                                                               | +                                                                                                  | 1224        | sense_intronic | novel transcript |             |      |   |
| -                                                                                                      | 11                                                                                                 | 15          | 12             | 0                | 0           |      |   |
| 0.434522714                                                                                            | 0.534033423                                                                                        | 0.457663064 | 0              | 0                | 0           |      |   |
| ENSG00000163479                                                                                        | 4789.08068                                                                                         | 5356.245749 | 5374.01157     |                  |             |      |   |
| 5934.642402                                                                                            | 6858.132617                                                                                        | 6427.133996 | 5173.112666    |                  |             |      |   |
| 6406.636338                                                                                            | -0.3084335                                                                                         | 0.007013043 | 0.110999536    | SSR2             |             |      |   |
| 1                                                                                                      | 156009048                                                                                          | 156020959   | -              | 6651             |             |      |   |
| protein_coding signal sequence receptor subunit 2 [Source:HGNC Symbol;Acc:HGNC:11324]                  |                                                                                                    |             |                |                  |             |      |   |
| 6962                                                                                                   | 36.19565124                                                                                        | 40.33390407 | 40.540236      | 5776             | 5385        | 5658 |   |
| 44.98946238                                                                                            | 52.29056754                                                                                        | 48.67187637 |                |                  |             |      |   |
| ENSG00000204681                                                                                        | 266.4340929                                                                                        | 274.0769023 | 277.2602922    |                  |             |      |   |
| 195.0662405                                                                                            | 103.0295639                                                                                        | 141.2455474 | 272.5904291    |                  |             |      |   |
| 146.4471173                                                                                            | 0.895340856                                                                                        | 0.007026294 | 1              | GABBR1           | 6           |      |   |
| 29555629                                                                                               | 29633976                                                                                           | -           | 8470           | protein_coding   |             |      |   |
| gamma-aminobutyric acid type B receptor subunit 1 [Source:HGNC Symbol;Acc:HGNC:4070]                   |                                                                                                    |             |                |                  |             |      |   |
| 153                                                                                                    | 1.581239211                                                                                        | 1.620636968 | 1.642399823    | 298              | 177         | 85   |   |
| 1.16118629                                                                                             | 0.616854696                                                                                        | 0.839922158 |                |                  |             |      |   |
| ENSG00000198133                                                                                        | 20.19897455                                                                                        | 20.0119643  | 23.26009163    |                  |             |      |   |
| 58.40966524                                                                                            | 58.18140078                                                                                        | 88.62465722 | 21.15701016    |                  |             |      |   |
| 68.40524108                                                                                            | -1.694913314                                                                                       | 0.007047309 | 1              | TMEM229B         |             |      |   |
| 14                                                                                                     | 67447084                                                                                           | 67533739    | -              | 6377             |             |      |   |
| protein_coding transmembrane protein 229B [Source:HGNC Symbol;Acc:HGNC:20130]                          |                                                                                                    |             |                |                  |             |      |   |
| 96                                                                                                     | 0.159222374                                                                                        | 0.157170132 | 0.183007811    | 25               | 53          | 48   |   |
| 0.461818681                                                                                            | 0.462670895                                                                                        | 0.699980327 |                |                  |             |      |   |
| ENSG00000237452                                                                                        | 0                                                                                                  | 0           | 0              | 27.87858788      |             |      |   |
| 13.84760269                                                                                            | 0                                                                                                  | 13.90873019 | -6.359628595   | 0.00704843       |             |      |   |
| 1                                                                                                      | BHMG1                                                                                              | 19          | 45733251       | 45764534         | +           |      |   |
| 2749                                                                                                   | protein_coding basic helix-loop-helix and HMG-box containing 1 [Source:HGNC Symbol;Acc:HGNC:44318] |             |                |                  |             | HMG  | 0 |
| 0                                                                                                      | 0                                                                                                  | 0           | 23             | 15               | 0           | 0    |   |
| 0                                                                                                      | 0.514280972                                                                                        | 0.253715814 |                |                  |             |      |   |

|                                             |                |                                        |                |                              |      |             |
|---------------------------------------------|----------------|----------------------------------------|----------------|------------------------------|------|-------------|
| ENSG00000236829                             | 32.70310165    | 33.06324536                            | 35.35533928    |                              |      |             |
| 84.85932497                                 | 129.6960392    | 66.46849292                            | 33.70722876    |                              |      |             |
| 93.67461904                                 | -1.472274875   | 0.007058427                            | 1              | Z97634.1                     |      |             |
| 16                                          | 382097         | 392960                                 | +              | 2291                         |      |             |
| transcribed_processed_pseudogene            |                |                                        |                | uncharacterized LOC100134368 |      |             |
| [Source:NCBI gene;Acc:100134368]            |                |                                        |                | -                            | 34   | 38 38       |
| 77                                          | 107            | 72                                     | 0.717554751    | 0.722798271                  |      |             |
| 0.774291592                                 | 1.8675734      | 2.870820565                            | 1.461296773    |                              |      |             |
| ENSG0000005379                              | 292.404203     | 304.5298915                            | 387.9783284    |                              |      |             |
| 145.4731285                                 | 219.3923655    | 200.3286523                            | 328.304141     |                              |      |             |
| 188.3980487                                 | 0.801477325    | 0.007091498                            | 1              | TSP0AP1 17                   |      |             |
| 58301228                                    | 58328760       | -                                      | 11354          | protein_coding               |      |             |
| TSP0 associated protein 1 [Source:HGNC      |                |                                        |                | Symbol;Acc:HGNC:16831]       |      |             |
| -                                           | 304            | 350                                    | 417            | 132                          | 181  | 217         |
| 1.294571108                                 | 1.343314653    | 1.71448307                             | 0.646006793    |                              |      |             |
| 0.979889367                                 | 0.888672748    |                                        |                |                              |      |             |
| ENSG0000049541                              | 879.1363209    | 1164.174271                            | 1089.502692    |                              |      |             |
| 1483.385083                                 | 1436.353332    | 1341.371114                            | 1044.271095    |                              |      |             |
| 1420.369843                                 | -0.443295745   | 0.007099143                            | 1              | RFC2 7                       |      |             |
| 74231499                                    | 74254458       | -                                      | 2211           | protein_coding               |      |             |
| replication factor C subunit 2 [Source:HGNC |                |                                        |                | Symbol;Acc:HGNC:9970]        |      |             |
| -                                           | 914            | 1338                                   | 1171           | 1346                         | 1185 |             |
| 1453                                        | 19.98750888    | 26.37096174                            | 24.72374117    |                              |      |             |
| 33.82737991                                 | 32.94404845    | 30.55680128                            |                |                              |      |             |
| ENSG00000213366                             | 132.7361185    | 174.8871663                            | 210.2712283    |                              |      |             |
| 54.00138862                                 | 94.54477627    | 89.54783073                            | 172.6315044    |                              |      |             |
| 79.36466521                                 | 1.121193059    | 0.007106201                            | 1              | GSTM2 1                      |      |             |
| 109668022                                   | 109709551      | +                                      | 9116           | protein_coding               |      |             |
| glutathione S-transferase mu 2 [Source:HGNC |                |                                        |                | Symbol;Acc:HGNC:4634]        |      |             |
| -                                           | 138            | 201                                    | 226            | 49                           | 78   |             |
| 97                                          | 0.731940851    | 0.960838372                            | 1.157311206    |                              |      |             |
| 0.298678394                                 | 0.525941749    | 0.494764392                            |                |                              |      |             |
| ENSG00000213592                             | 20.19897455    | 8.700854042                            | 6.512825656    | 0                            |      |             |
| 0                                           | 0              | 11.80421808                            | 0              | 5.902465191                  |      |             |
| 0.007113034                                 | 1              | PPIAP42 11                             | 57718044       | 57718530                     |      |             |
| -                                           | 487            | processed_pseudogene                   | peptidylprolyl |                              |      |             |
| isomerase A pseudogene 42 [Source:HGNC      |                |                                        |                | Symbol;Acc:HGNC:53666]       |      |             |
| 21                                          | 10             | 7                                      | 0              | 0                            | 0    | 2.084930344 |
| 0.894807543                                 | 0.670988558    | 0                                      | 0              | 0                            |      |             |
| ENSG00000164078                             | 16.35155083    | 3.480341617                            | 26.05130263    |                              |      |             |
| 1.102069155                                 | 0              | 15.29439836                            | 0.367356385    |                              |      |             |
| 5.314166413                                 | 0.007153242    | 1                                      | MST1R 3        | 49887002                     |      |             |
| 49903873                                    | -              | 5252                                   | protein_coding | macrophage                   |      |             |
| stimulating 1 receptor [Source:HGNC         |                |                                        |                | Symbol;Acc:HGNC:7381]        |      |             |
| 17                                          | 4              | 28                                     | 1              | 0                            | 0    | 0.156503992 |
| 0.033188977                                 | 0.248873898    | 0.01058004                             | 0              | 0                            |      |             |
| ENSG00000224982                             | 0              | 0                                      | 0              | 26.66647536                  |      |             |
| 14.7707762                                  | 0              | 13.81241719                            | -6.349841819   | 0.007202277                  |      |             |
| 1                                           | TMEM233 12     | 119593459                              | 119643066      | +                            |      |             |
| 3146                                        | protein_coding | transmembrane protein 233 [Source:HGNC |                |                              |      |             |

|                                                 |                                            |           |             |     |             |                |
|-------------------------------------------------|--------------------------------------------|-----------|-------------|-----|-------------|----------------|
| Symbol;Acc:HGNC:37219]                          | -                                          | 0         | 0           | 0   | 0           | 22             |
| 16                                              | 0                                          | 0         | 0           | 0   | 0.429844449 |                |
| 0.236478838                                     |                                            |           |             |     |             |                |
| ENSG00000101493                                 | 347.2299911                                |           | 321.0615142 |     | 301.4507875 |                |
| 224.8221077                                     | 119.9991391                                |           | 195.7127847 |     | 323.2474309 |                |
| 180.1780105                                     | 0.841245401                                |           | 0.007260048 |     | 1           | ZNF516 18      |
| 76358190                                        |                                            | 76495190  | -           |     | 8217        | protein_coding |
| zinc finger protein 516                         | [Source:HGNC Symbol;Acc:HGNC:28990]        |           |             |     |             |                |
| zf-C2H2                                         | 361                                        | 369       | 324         | 204 | 99          | 212            |
| 2.124198664                                     | 1.956913715                                |           | 1.840677735 |     | 1.379522932 |                |
| 0.740575376                                     | 1.199647331                                |           |             |     |             |                |
| ENSG00000171488                                 | 612.702228                                 |           | 649.953797  |     | 659.6561986 |                |
| 946.6774045                                     | 927.266075                                 |           | 802.2377826 |     | 640.7707412 |                |
| 892.0604207                                     | -0.476724529                               |           | 0.007268361 |     | 1           | LRRRC8 1       |
| 89633072                                        |                                            | 89769903  | +           |     | 11724       | protein_coding |
| leucine rich repeat containing 8 VRAC subunit C | [Source:HGNC                               |           |             |     |             |                |
| Symbol;Acc:HGNC:25075]                          | -                                          | 637       | 747         | 709 | 859         | 765            |
| 869                                             | 2.627028831                                |           | 2.776536518 |     | 2.823036292 |                |
| 4.071265244                                     | 4.010818279                                |           | 3.446473827 |     |             |                |
| ENSG00000180044                                 | 54.82578806                                |           | 44.37435562 |     | 58.61543091 |                |
| 141.0648519                                     | 116.3628016                                |           | 108.9344745 |     | 52.60519153 |                |
| 122.1207093                                     | -1.215287088                               |           | 0.007350673 |     | 1           | C3orf80 3      |
| 160225496                                       |                                            | 160228213 | +           |     | 2718        | protein_coding |
| chromosome 3 open reading frame 80              | [Source:HGNC                               |           |             |     |             |                |
| Symbol;Acc:HGNC:40048]                          | -                                          | 57        | 51          | 63  | 128         | 96             |
| 118                                             | 1.013973535                                |           | 0.817672368 |     | 1.082024596 |                |
| 2.61681223                                      | 2.171046577                                |           | 2.018661838 |     |             |                |
| ENSG00000133624                                 | 100.0330168                                |           | 122.682042  |     | 120.0220728 |                |
| 46.28690453                                     | 54.54506323                                |           | 43.3891551  |     | 114.2457105 |                |
| 48.07370762                                     | 1.251019574                                |           | 0.007395675 |     | 1           | ZNF767P 7      |
| 149547154                                       |                                            | 149624752 | -           |     | 4012        |                |
| transcribed_unprocessed_pseudogene              | "zinc finger family member                 |           |             |     |             |                |
| 767, pseudogene                                 | [Source:HGNC Symbol;Acc:HGNC:21884]" - 104 |           |             |     |             |                |
| 141                                             | 129                                        | 42        | 45          | 47  | 1.253353654 |                |
| 1.531499241                                     | 1.500979711                                |           | 0.581701803 |     | 0.689443926 |                |
| 0.544713265                                     |                                            |           |             |     |             |                |
| ENSG00000183023                                 | 18.27526269                                |           | 24.36239132 |     | 26.05130263 |                |
| 94.77794737                                     | 46.06027562                                |           | 79.39292209 |     | 22.89631888 |                |
| 73.41038169                                     | -1.681482259                               |           | 0.007436654 |     | 1           | SLC8A1 2       |
| 40097270                                        |                                            | 40611053  | -           |     | 21922       | protein_coding |
| solute carrier family 8 member A1               | [Source:HGNC                               |           |             |     |             |                |
| Symbol;Acc:HGNC:11068]                          | -                                          | 19        | 28          | 28  | 86          | 38             |
| 86                                              | 0.041905849                                |           | 0.055659135 |     | 0.059624382 |                |
| 0.217986863                                     | 0.106549345                                |           | 0.182410274 |     |             |                |
| ENSG00000279267                                 | 130.8124066                                |           | 214.0410094 |     | 144.2125681 |                |
| 14.32689902                                     | 92.12055124                                |           | 65.5453194  |     | 163.0219947 |                |
| 57.33092322                                     | 1.509438611                                |           | 0.007488552 |     | 1           | AL078621.3     |
| 2                                               | 113605867                                  |           | 113607908   |     | -           | 2042 TEC       |
| TEC                                             | -                                          | 136       | 246         | 155 | 13          | 76 71          |
| 3.220211429                                     | 5.249742081                                |           | 3.543414812 |     | 0.353752614 |                |

|                                                        |                                                       |                |                            |                |                |
|--------------------------------------------------------|-------------------------------------------------------|----------------|----------------------------|----------------|----------------|
|                                                        | 2.287732357                                           | 1.616715601    |                            |                |                |
| ENSG00000258102                                        | 26.93196607                                           | 41.7640994     | 81.87552254                |                |                |
| 135.5545061                                            | 141.8171644                                           | 113.5503421    | 50.19052934                |                |                |
| 130.3073375                                            | -1.375570384                                          | 0.007590974    | 1                          | MAP1LC3B2      |                |
| 12                                                     | 116548105                                             | 116576448      | +                          | 1767           |                |
| protein_coding                                         | microtubule associated protein 1 light chain 3 beta 2 |                |                            |                |                |
| [Source:HGNC Symbol;Acc:HGNC:34390]                    | -                                                     |                | 28                         | 48             | 88             |
| 123                                                    | 117                                                   | 123            | 0.766165687                | 1.183758977    |                |
| 2.324835124                                            | 3.86794781                                            | 4.07002121     | 3.236678627                |                |                |
| ENSG00000116237                                        | 3468.452487                                           | 3268.040778    | 3563.446038                |                |                |
| 3968.551029                                            | 4180.576069                                           | 4745.111855    | 3433.313101                |                |                |
| 4298.079651                                            | -0.324361149                                          | 0.007604673    | 0.119334874                | ICMT           |                |
| 1                                                      | 6221193                                               | 6235972        | -                          | 4910           | protein_coding |
| isoprenylcysteine carboxyl methyltransferase           | [Source:HGNC                                          |                |                            |                |                |
| Symbol;Acc:HGNC:5350]                                  | -                                                     | 3606           | 3756                       | 3830           | 3601           |
| 5140                                                   | 35.50957274                                           | 33.33517115    | 36.41357489                |                |                |
| 40.75244528                                            | 43.17765605                                           | 48.67574923    |                            |                |                |
| ENSG00000173698                                        | 12.5041271                                            | 9.570939447    | 12.09524765                | 0              |                |
| 0                                                      | 0                                                     | 11.39010473    | 0                          | 5.851351756    |                |
| 0.007647326                                            | 1                                                     | ADGRG2         | X                          | 18989309       | 19122637       |
| -                                                      | 10155                                                 | protein_coding | adhesion G protein-coupled |                |                |
| receptor G2                                            | [Source:HGNC Symbol;Acc:HGNC:4516]                    | -              | 13                         | 11             |                |
| 13                                                     | 0                                                     | 0              | 0                          | 0.061896293    | 0.047203191    |
| 0.059759845                                            | 0                                                     | 0              | 0                          |                |                |
| ENSG00000244560                                        | 119.2701354                                           | 68.73674694    | 173.0550817                |                |                |
| 27.55172889                                            | 38.78760052                                           | 63.69897238    | 120.353988                 |                |                |
| 43.3461006                                             | 1.468126736                                           | 0.007663734    | 1                          | AC004890.2     |                |
| 7                                                      | 149285281                                             | 149297312      | +                          | 4288           |                |
| transcribed_unprocessed_pseudogene                     | AI894139                                              | pseudogene     |                            |                |                |
| [Source:NCBI gene;Acc:155060]                          | -                                                     | 124            | 79                         | 186            | 25             |
| 32                                                     | 69                                                    | 1.398196224    | 0.802843531                | 2.024902905    |                |
| 0.32396439                                             | 0.458714599                                           | 0.748213142    |                            |                |                |
| ENSG00000119943                                        | 102.9185846                                           | 94.83930906    | 89.31875186                |                |                |
| 14.32689902                                            | 25.45436284                                           | 53.54406374    | 95.69221518                |                |                |
| 31.10844187                                            | 1.612689987                                           | 0.007731882    | 1                          | PYROXD2        | 10             |
| 98383565                                               | 98415184                                              | -              | 3867                       | protein_coding |                |
| pyridine nucleotide-disulphide oxidoreductase domain 2 |                                                       |                |                            |                |                |
| [Source:HGNC Symbol;Acc:HGNC:23517]                    | -                                                     |                | 107                        | 109            | 96             |
| 13                                                     | 21                                                    | 58             | 1.337860471                | 1.228318304    |                |
| 1.158892352                                            | 0.186801872                                           | 0.333804727    | 0.697404651                |                |                |
| ENSG00000223745                                        | 401.0939232                                           | 318.451258     | 378.6742917                |                |                |
| 167.5145116                                            | 101.8174514                                           | 294.4923506    | 366.0731576                |                |                |
| 187.9414379                                            | 0.957600995                                           | 0.007734162    | 1                          | CCDC18-AS1     |                |
| 1                                                      | 93262186                                              | 93346025       | -                          | 4786           |                |
| processed_transcript                                   | CCDC18 antisense RNA 1                                | [Source:HGNC   |                            |                |                |
| Symbol;Acc:HGNC:52262]                                 | -                                                     | 417            | 366                        | 407            | 152            |
| 319                                                    | 4.212739232                                           | 3.332475681    | 3.969791987                |                | 84             |
| 1.764748971                                            | 1.078832328                                           | 3.099195744    |                            |                |                |
| ENSG00000067560                                        | 10624.66061                                           | 10434.93425    | 8630.424398                |                |                |
| 12322.23523                                            | 13254.45037                                           | 11379.95989    | 9896.673088                |                |                |



|                                         |                                          |             |                                     |                |
|-----------------------------------------|------------------------------------------|-------------|-------------------------------------|----------------|
| 12318.88183                             | -0.315766437                             | 0.00774073  | 0.120440516                         | RHOA           |
| 3                                       | 49359145                                 | 49412998    | - 2582                              |                |
| protein_coding                          | ras homolog family member A [Source:HGNC |             |                                     |                |
| Symbol;Acc:HGNC:667]                    | -                                        | 11046 11993 | 9276 11181                          | 10935          |
| 12327                                   | 206.8473767                              | 202.4091744 | 167.7067481                         |                |
| 240.6226211                             | 260.321423                               | 221.9893687 |                                     |                |
| ENSG00000181227                         | 39.43609317                              | 26.10256213 | 28.84251362                         |                |
| 5.510345777                             | 1.212112516                              | 6.462214589 | 31.46038964                         |                |
| 4.394890961                             | 2.820062784                              | 0.00775341  | 1                                   | DLSTP1 1       |
| 75743423                                | 75744776                                 | -           | 1354                                |                |
| processed_pseudogene                    | dihydrolipoamide S-succinyltransferase   |             |                                     |                |
| pseudogene 1 [Source:HGNC               | Symbol;Acc:HGNC:2912]                    | -           | 41                                  | 30             |
| 31                                      | 5                                        | 1           | 7                                   | 1.464085397    |
| 1.068781838                             | 0.205193398                              | 0.045397161 | 0.965519808                         | 0.240386677    |
| ENSG00000258754                         | 10.58041524                              | 17.40170808 | 6.512825656                         | 0              |
| 0                                       | 0                                        | 11.49831633 | 0                                   | 5.865758881    |
| 0.007763839                             | 1                                        | LINC01579   | 15                                  | 93718542       |
| 94070820                                | -                                        | 6795        | lincRNA long intergenic non-protein |                |
| coding RNA 1579 [Source:HGNC            | Symbol;Acc:HGNC:27519]                   | -           |                                     | 11             |
| 20                                      | 7                                        | 0           | 0                                   | 0.078271641    |
| 0.128262332                             | 0.048089982                              | 0           | 0                                   | 0              |
| ENSG00000060558                         | 6.732991517                              | 21.75213511 | 6.512825656                         | 0              |
| 0                                       | 0                                        | 11.66598409 | 0                                   | 5.887142118    |
| 0.007800959                             | 1                                        | GNA15       | 19                                  | 3136193        |
| protein_coding                          | G protein subunit alpha 15 [Source:HGNC  |             |                                     |                |
| Symbol;Acc:HGNC:4383]                   | -                                        | 7           | 25                                  | 7              |
| 0                                       | 0.129526863                              | 0.416926209 | 0.125056038                         | 0              |
| 0                                       | 0                                        |             |                                     |                |
| ENSG00000130402                         | 12241.54043                              | 11895.80765 | 14545.9309                          |                |
| 17460.08163                             | 15353.82924                              | 15151.12369 | 12894.42633                         |                |
| 15988.34485                             | -0.310269431                             | 0.00780744  | 0.120457649                         | ACTN4          |
| 19                                      | 38647649                                 | 38731583    | + 6098                              |                |
| protein_coding                          | actinin alpha 4 [Source:HGNC             |             |                                     |                |
| Symbol;Acc:HGNC:166]                    | -                                        | 12727 13672 | 15634 15843                         | 12667 16412    |
| 100.9113092                             | 97.70194903                              | 119.6819684 | 144.3650434                         |                |
| 127.683186                              | 125.1425806                              |             |                                     |                |
| ENSG00000102978                         | 3356.877199                              | 3717.874932 | 3255.482424                         |                |
| 3875.97722                              | 4462.998285                              | 4666.642107 | 3443.411519                         |                |
| 4335.20587                              | -0.332295766                             | 0.007962212 | 0.121821849                         | POLR2C         |
| 16                                      | 57462387                                 | 57472010    | + 3940                              |                |
| protein_coding                          | RNA polymerase II subunit C [Source:HGNC |             |                                     |                |
| Symbol;Acc:HGNC:9189]                   | -                                        | 3490 4273   | 3499 3517                           | 3682           |
| 5055                                    | 42.82825912                              | 47.26016883 | 41.45660719                         |                |
| 49.60074392                             | 57.44271025                              | 59.65625085 |                                     |                |
| ENSG00000069020                         | 1164.807532                              | 879.6563437 | 1000.18394                          |                |
| 717.4470202                             | 762.4187728                              | 709.9204313 | 1014.882605                         |                |
| 729.9287414                             | 0.475497585                              | 0.00806379  | 1                                   | MAST4 5        |
| 66596361                                | 67169595                                 | +           | 14675                               | protein_coding |
| microtubule associated serine/threonine | kinase family member 4                   |             |                                     |                |
| [Source:HGNC                            | Symbol;Acc:HGNC:19037]                   | -           | 1211                                | 1011 1075      |

|                                                                |                                               |             |             |             |                     |    |
|----------------------------------------------------------------|-----------------------------------------------|-------------|-------------|-------------|---------------------|----|
| 651                                                            | 629                                           | 769         | 3.989948129 | 3.002144856 |                     |    |
| 3.419608518                                                    | 2.464988641                                   |             | 2.634631595 | 2.436571993 |                     |    |
| ENSG00000132341                                                | 14033.47803                                   |             | 15361.35781 | 13601.57118 |                     |    |
| 15838.9379                                                     | 18552.59417                                   |             | 18056.35074 | 14332.13568 |                     |    |
| 17482.6276                                                     | -0.286645932                                  |             | 0.008118367 | 0.123176705 | RAN                 |    |
| 12                                                             | 130871879                                     |             | 130877678   | + 4825      |                     |    |
| protein_coding                                                 | "RAN, member RAS oncogene family [Source:HGNC |             |             |             |                     |    |
| Symbol;Acc:HGNC:9846]"                                         | -                                             |             | 14590 17655 | 14619 14372 | 15306               |    |
| 19559                                                          | 146.2039785                                   |             | 159.4516442 | 141.4380904 |                     |    |
| 165.5129329                                                    | 194.9897361                                   |             | 188.4865421 |             |                     |    |
| ENSG00000207971                                                | 8.656703379                                   |             | 6.960683234 | 18.6080733  | 0                   |    |
| 0                                                              | 0                                             | 11.40848664 | 0           | 5.853629285 |                     |    |
| 0.0081479                                                      | 1                                             | MIR125B1    | 11          | 122099757   |                     |    |
| 122099844                                                      | -                                             | 88          | miRNA       | microRNA    | 125b-1 [Source:HGNC |    |
| Symbol;Acc:HGNC:31506]"                                        | -                                             |             | 9 8         | 20 0        | 0                   |    |
| 0                                                              | 4.944940312                                   |             | 3.961557032 | 10.60946194 | 0                   |    |
| 0                                                              | 0                                             |             |             |             |                     |    |
| ENSG00000130706                                                | 7516.9041                                     |             | 6152.373893 | 6180.671548 |                     |    |
| 6811.88945                                                     | 9196.297661                                   |             | 10004.43136 | 6616.649847 |                     |    |
| 8670.872823                                                    | -0.390189657                                  |             | 0.008184944 | 0.123176705 | ADRM1               |    |
| 20                                                             | 62302093                                      |             | 62308862    | + 2142      |                     |    |
| protein_coding                                                 | adhesion regulating molecule 1 [Source:HGNC   |             |             |             |                     |    |
| Symbol;Acc:HGNC:15759]"                                        | -                                             |             | 7815 7071   | 6643 6181   | 7587                |    |
| 10837                                                          | 176.4049357                                   |             | 143.8533462 | 144.7740827 |                     |    |
| 160.3434858                                                    | 217.7198256                                   |             | 235.2451211 |             |                     |    |
| ENSG00000085840                                                | 730.0486516                                   |             | 678.6666153 | 842.9457207 |                     |    |
| 1158.274682                                                    | 849.6908739                                   |             | 1200.125567 | 750.5536625 |                     |    |
| 1069.363708                                                    | -0.511585638                                  |             | 0.008196324 | 1           | ORC1                | 1  |
| 52372829                                                       | 52404459                                      |             | -           | 3157        | protein_coding      |    |
| origin recognition complex subunit 1 [Source:HGNC              |                                               |             |             |             |                     |    |
| Symbol;Acc:HGNC:8487]"                                         | -                                             |             | 759 780     | 906 1051    | 701                 |    |
| 1300                                                           | 11.62434285                                   |             | 10.76660099 | 13.39675613 |                     |    |
| 18.49865606                                                    | 13.64868455                                   |             | 19.14695817 |             |                     |    |
| ENSG00000184076                                                | 248.1588302                                   |             | 181.8478495 | 273.5386776 |                     |    |
| 382.4179969                                                    | 403.6334679                                   |             | 365.576711  | 234.5151191 |                     |    |
| 383.8760586                                                    | -0.711214604                                  |             | 0.008225365 | 1           | UQCR10              | 22 |
| 29767369                                                       | 29770413                                      |             | +           | 975         | protein_coding      |    |
| "ubiquinol-cytochrome c reductase, complex III subunit X       |                                               |             |             |             |                     |    |
| [Source:HGNC Symbol;Acc:HGNC:30863]"                           | -                                             |             |             | 258 209     | 294                 |    |
| 347                                                            | 333 396                                       |             | 12.79429343 | 9.341148325 |                     |    |
| 14.07630766                                                    | 19.77592939                                   |             | 20.99360289 | 18.88519999 |                     |    |
| ENSG00000130717                                                | 1092.668338                                   |             | 1344.28195  | 1204.872746 |                     |    |
| 1439.302317                                                    | 1615.745984                                   |             | 1831.576249 | 1213.941011 |                     |    |
| 1628.87485                                                     | -0.42434299                                   |             | 0.008242578 | 1           | UCK1                | 9  |
| 131523801                                                      | 131531268                                     |             | -           | 2688        | protein_coding      |    |
| uridine-cytidine kinase 1 [Source:HGNC Symbol;Acc:HGNC:14859]" |                                               |             |             |             |                     |    |
| -                                                              | 1136 1545                                     |             | 1295 1306   | 1333 1984   |                     |    |
| 20.43385388                                                    | 25.04712119                                   |             | 22.48984902 | 26.99764959 |                     |    |
| 30.48233595                                                    | 34.31969515                                   |             |             |             |                     |    |
| ENSG00000114626                                                | 634.8249144                                   |             | 594.2683311 | 703.3851709 |                     |    |

|                                                                     |              |             |             |                |           |
|---------------------------------------------------------------------|--------------|-------------|-------------|----------------|-----------|
| 349.3559223                                                         | 487.2692316  | 458.8172358 | 644.1594721 |                |           |
| 431.8141299                                                         | 0.57700011   | 0.00825032  | 1           | ABTB1          | 3         |
| 127672935                                                           | 127680920    | +           | 6149        | protein_coding |           |
| ankyrin repeat and BTB domain containing 1 [Source:HGNC             |              |             |             |                |           |
| Symbol;Acc:HGNC:18275]                                              | -            | 660         | 683         | 756            | 317 402   |
| 497                                                                 | 5.189680947  | 4.840328181 | 5.739358304 |                |           |
| 2.864618635                                                         | 4.01854578   | 3.758226182 |             |                |           |
| ENSG00000177363                                                     | 334.725864   | 305.3999769 | 358.2054111 |                |           |
| 157.5958892                                                         | 255.7557409  | 164.3248853 | 332.777084  |                |           |
| 192.5588385                                                         | 0.791483061  | 0.008395829 | 1           | LRRN4CL        | 11        |
| 62686402                                                            | 62689899     | -           | 2585        | protein_coding |           |
| LRRN4 C-terminal like [Source:HGNC Symbol;Acc:HGNC:33724]           |              |             |             |                |           |
| -                                                                   | 348          | 351         | 385         | 143            | 211 178   |
| 6.509084552                                                         | 5.917049014  | 6.952583572 | 3.07388442  |                |           |
| 5.01729074                                                          | 3.201772521  |             |             |                |           |
| ENSG00000133265                                                     | 3319.364818  | 2813.856197 | 3258.273635 |                |           |
| 3451.680595                                                         | 4236.333244  | 4335.222816 | 3130.498217 |                |           |
| 4007.745552                                                         | -0.356568254 | 0.00840718  | 0.123753357 |                | HSPBP1    |
| 19                                                                  | 55262231     | 55280381    | -           | 2159           |           |
| protein_coding HSPA (Hsp70) binding protein 1 [Source:HGNC          |              |             |             |                |           |
| Symbol;Acc:HGNC:24989]                                              | -            | 3451        | 3234        | 3502           | 3132 3495 |
| 4696                                                                | 77.28470142  | 65.2748633  | 75.71981344 |                |           |
| 80.60855847                                                         | 99.50431125  | 101.1361609 |             |                |           |
| ENSG00000104853                                                     | 4165.798037  | 4098.102254 | 4404.530951 |                |           |
| 5241.440903                                                         | 5379.355347  | 4879.895188 | 4222.810414 |                |           |
| 5166.897146                                                         | -0.290958955 | 0.008418361 | 0.123753357 |                | CLPTM1    |
| 19                                                                  | 44954585     | 44993341    | +           | 5229           |           |
| protein_coding "CLPTM1, transmembrane protein [Source:HGNC          |              |             |             |                |           |
| Symbol;Acc:HGNC:2087]"                                              | -            | 4331        | 4710        | 4734           | 4756 4438 |
| 5286                                                                | 40.04707106  | 39.25191621 | 42.26254514 |                |           |
| 50.54000118                                                         | 52.16942094  | 47.00451058 |             |                |           |
| ENSG00000012963                                                     | 1348.522015  | 1832.399861 | 1502.601919 |                |           |
| 2183.198997                                                         | 2009.682552  | 2008.825564 | 1561.174599 |                |           |
| 2067.235704                                                         | -0.404776518 | 0.008422856 | 1           | UBR7           | 14        |
| 93207056                                                            | 93229215     | +           | 3694        | protein_coding |           |
| ubiquitin protein ligase E3 component n-recognin 7 (putative)       |              |             |             |                |           |
| [Source:HGNC Symbol;Acc:HGNC:20344]                                 | -            |             | 1402        | 2106           | 1615      |
| 1981                                                                | 1658         | 2176        | 18.35068748 | 24.84391722    |           |
| 20.40899745                                                         | 29.79885851  | 27.58893877 | 27.39006217 |                |           |
| ENSG00000214485                                                     | 2806.695607  | 3462.939909 | 2825.635931 |                |           |
| 3976.265513                                                         | 3757.548801  | 3774.856494 | 3031.757149 |                |           |
| 3836.223602                                                         | -0.339381522 | 0.008425474 | 0.123753357 |                | RPL7P1    |
| 5                                                                   | 150094302    | 150095048   | +           | 747            |           |
| processed_pseudogene ribosomal protein L7 pseudogene 1 [Source:HGNC |              |             |             |                |           |
| Symbol;Acc:HGNC:10367]                                              | -            | 2918        | 3980        | 3037           | 3608 3100 |
| 4089                                                                | 188.8712707  | 232.1780012 | 189.7886453 |                |           |
| 268.3848339                                                         | 255.087074   | 254.5232891 |             |                |           |
| ENSG00000128185                                                     | 1203.28177   | 1265.974263 | 1190.916691 |                |           |
| 1265.17539                                                          | 1886.047075  | 1921.12408  | 1220.057575 |                |           |
| 1690.782182                                                         | -0.470841542 | 0.008460228 | 1           | DGCR6L         | 22        |

|                                                                |                                   |                       |             |                |             |             |
|----------------------------------------------------------------|-----------------------------------|-----------------------|-------------|----------------|-------------|-------------|
| 20314276                                                       | 20320080                          | -                     | 1154        | protein_coding |             |             |
| DiGeorge syndrome critical region gene 6 like [Source:HGNC     |                                   |                       |             |                |             |             |
| Symbol;Acc:HGNC:18551]                                         | -                                 | 1251                  | 1455        | 1280           | 1148        | 1556        |
| 2081                                                           | 52.41465329                       | 54.9434318            | 51.77858724 |                |             |             |
| 55.27746559                                                    | 82.88026749                       | 83.84888455           |             |                |             |             |
| ENSG00000085382                                                | 547.2960247                       | 525.5315842           | 388.908732  |                |             |             |
| 317.3959168                                                    | 327.2703794                       | 296.3386976           | 487.245447  |                |             |             |
| 313.6683312                                                    | 0.635956042                       | 0.008473099           | 1           | HACE1          | 6           |             |
| 104728093                                                      | 104859919                         | -                     | 9238        | protein_coding |             |             |
| HECT domain and ankyrin repeat containing E3 ubiquitin protein |                                   |                       |             |                |             |             |
| ligase 1 [Source:HGNC                                          | Symbol;Acc:HGNC:21033]            | -                     | 569         | 604            |             |             |
| 418                                                            | 288                               | 270                   | 321         | 2.978074274    | 2.849164854 |             |
| 2.112245335                                                    | 1.732313834                       | 1.796524592           | 1.615690207 |                |             |             |
| ENSG00000279488                                                | 7.694847448                       | 0                     | 36.28574294 | 0              | 0           |             |
| 0                                                              | 14.6601968                        | 0                     | 6.215192836 | 0.008549944    |             |             |
| 1                                                              | AC004623.1                        | 19                    | 1372238     | 1374364        | -           | 2127        |
| TEC                                                            | TEC                               | -                     | 8           | 0              | 39          | 0           |
| 0                                                              | 0.181854358                       | 0                     | 0.855939666 | 0              | 0           | 0           |
| 0                                                              |                                   |                       |             |                |             |             |
| ENSG00000067225                                                | 49989.57644                       | 52453.96868           | 61308.01911 |                |             |             |
| 64284.7959                                                     | 70930.40023                       | 64502.13333           | 54583.85475 |                |             |             |
| 66572.44316                                                    | -0.286439849                      | 0.008588005           | 0.124186412 |                |             | PKM         |
| 15                                                             | 72199029                          | 72231822              | -           | 8571           |             |             |
| protein_coding                                                 | pyruvate kinase M1/2 [Source:HGNC |                       |             |                |             |             |
| Symbol;Acc:HGNC:9021]                                          | -                                 | 51972                 | 60286       | 65894          | 58331       | 58518       |
| 69870                                                          | 293.1832476                       | 306.5092404           | 358.8892189 |                |             |             |
| 378.1638148                                                    | 419.6675019                       | 379.0445584           |             |                |             |             |
| ENSG00000134250                                                | 13321.70464                       | 11270.21624           | 12269.23313 |                |             |             |
| 10961.17982                                                    | 8472.666489                       | 10009.9704            | 12287.05134 |                |             |             |
| 9814.605569                                                    | 0.324026102                       | 0.008590237           | 0.124186412 |                |             | NOTCH2      |
| 1                                                              | 119911553                         | 120069626             | -           | 16807          |             |             |
| protein_coding                                                 | notch 2 [Source:HGNC              | Symbol;Acc:HGNC:7882] | -           |                |             |             |
| 13850                                                          | 12953                             | 13187                 | 9946        | 6990           | 10843       | 39.84380352 |
| 33.58449043                                                    | 36.62704162                       | 32.88291414           | 25.56432534 |                |             |             |
| 29.99786013                                                    |                                   |                       |             |                |             |             |
| ENSG00000264885                                                | 292.404203                        | 100.9299069           | 155.3774121 |                |             |             |
| 52.89931946                                                    | 64.24196336                       | 108.9344745           | 182.9038407 |                |             |             |
| 75.35858578                                                    | 1.274986598                       | 0.00859337            | 1           | AC026271.3     |             |             |
| 17                                                             | 18667629                          | 18669461              | -           | 1833           |             |             |
| sense_intronic                                                 | novel transcript                  | -                     | 304         | 116            | 167         |             |
| 48                                                             | 53                                | 118                   | 8.018854532 | 2.757745103    |             |             |
| 4.253045628                                                    | 1.455093216                       | 1.777300098           | 2.99330217  |                |             |             |
| ENSG00000127957                                                | 151.9732371                       | 91.35896745           | 81.87552254 |                |             |             |
| 24.24552142                                                    | 65.45407588                       | 12.92442918           | 108.4025757 |                |             |             |
| 34.20800883                                                    | 1.6735325                         | 0.008607177           | 1           | PMS2P3         | 7           |             |
| 75502930                                                       | 75528148                          | -                     | 1727        |                |             |             |
| transcribed_unprocessed_pseudogene                             | "PMS1 homolog 2, mismatch         |                       |             |                |             |             |
| repair system component pseudogene 3 [Source:HGNC              | Symbol;Acc:HGNC:9128]"            | -                     | 158         | 105            | 88          | 22          |
| 14                                                             | 4.423499331                       | 2.649448971           | 2.378681914 | 54             |             |             |

|                                                                       |                                                    |             |             |                |                      |
|-----------------------------------------------------------------------|----------------------------------------------------|-------------|-------------|----------------|----------------------|
| 0.707851875                                                           | 1.921979639                                        | 0.376935218 |             |                |                      |
| ENSG00000095564                                                       | 1968.919091                                        | 1548.75202  | 1717.525166 |                |                      |
| 1389.709205                                                           | 1123.628303                                        | 1389.376137 | 1745.065425 |                |                      |
| 1300.904548                                                           | 0.423072896                                        | 0.008609739 | 1           | BTAF1          | 10                   |
| 91923769                                                              | 92030325                                           | +           | 7582        | protein_coding |                      |
| B-TFIID TATA-box binding protein associated factor 1                  |                                                    |             |             |                |                      |
| [Source:HGNC Symbol;Acc:HGNC:17307]                                   | -                                                  | 2047        | 1780        | 1846           |                      |
| 1261                                                                  | 927                                                | 1505        | 13.05374964 | 10.23045195    |                      |
| 11.36564148                                                           | 9.241518774                                        | 7.515247958 | 9.229618242 |                |                      |
| ENSG00000116883                                                       | 43.28351689                                        | 70.47691774 | 81.87552254 |                |                      |
| 24.24552142                                                           | 8.484787614                                        | 21.23299079 | 65.21198572 |                |                      |
| 17.98776661                                                           | 1.852213813                                        | 0.008672625 | 1           | AL591845.1     |                      |
| 1                                                                     | 36323734                                           | 36329221    | +           | 1838           |                      |
| antisense                                                             | "novel transcript, antisense to EVA1B"             |             |             | -              | 45                   |
| 81                                                                    | 88                                                 | 22          | 7           | 23             | 1.183772436          |
| 1.920428355                                                           | 2.235029197                                        | 0.665103476 | 0.23409918  |                |                      |
| 0.581853093                                                           |                                                    |             |             |                |                      |
| ENSG00000138834                                                       | 1146.53227                                         | 855.2939524 | 1379.788635 |                |                      |
| 675.5683923                                                           | 753.9339851                                        | 888.0929192 | 1127.204953 |                |                      |
| 772.5317656                                                           | 0.544287629                                        | 0.008740798 | 1           | MAPK8IP3       |                      |
| 16                                                                    | 1706183                                            | 1770317     | +           | 10285          | protein_coding       |
| mitogen-activated protein kinase 8 interacting protein 3 [Source:HGNC |                                                    |             |             |                |                      |
| Symbol;Acc:HGNC:6884]                                                 | -                                                  | 1192        | 983         | 1483           | 613 622              |
| 962                                                                   | 5.603678053                                        | 4.164931083 | 6.73105115  |                |                      |
| 3.311831421                                                           | 3.717349963                                        | 4.349124039 |             |                |                      |
| ENSG00000268575                                                       | 180.828915                                         | 207.0803262 | 169.3334671 |                |                      |
| 111.3089847                                                           | 44.8481631                                         | 100.6259129 | 185.7475694 |                |                      |
| 85.59435356                                                           | 1.114429333                                        | 0.008758535 | 1           | AL031282.2     |                      |
| 1                                                                     | 1702736                                            | 1737688     | -           | 5079           | processed_transcript |
| "novel transcript, readthrough between SLC35E2 and CDK11A"            |                                                    |             |             |                |                      |
| -                                                                     | 188                                                | 238         | 182         | 101            | 37 109               |
| 1.789702534                                                           | 2.042007543                                        | 1.672781478 | 1.104982003 |                |                      |
| 0.447786371                                                           | 0.997882263                                        |             |             |                |                      |
| ENSG00000185689                                                       | 17.31340676                                        | 7.830768638 | 8.373632987 | 0              |                      |
| 0                                                                     | 0                                                  | 11.17260279 | 0           | 5.823164387    |                      |
| 0.008787323                                                           | 1                                                  | C6orf201    | 6           | 4079206        | 4130951 +            |
| 3322                                                                  | protein_coding chromosome 6 open reading frame 201 |             |             |                |                      |
| [Source:HGNC Symbol;Acc:HGNC:21620]                                   | -                                                  | 18          | 9           | 9              |                      |
| 0                                                                     | 0                                                  | 0           | 0.261983593 | 0.118059647    |                      |
| 0.126470407                                                           | 0                                                  | 0           | 0           |                |                      |
| ENSG00000177990                                                       | 179.8670591                                        | 84.39828421 | 183.289522  |                |                      |
| 70.53242595                                                           | 58.18140078                                        | 65.5453194  | 149.1849551 |                |                      |
| 64.75304871                                                           | 1.202737347                                        | 0.008788519 | 1           | DPY19L2        | 12                   |
| 63558913                                                              | 63668939                                           | -           | 5646        | protein_coding |                      |
| dpy-19 like 2 [Source:HGNC Symbol;Acc:HGNC:19414]                     |                                                    |             |             |                |                      |
| 187                                                                   | 97                                                 | 197         | 64          | 48             | 71 1.601407836       |
| 0.748668323                                                           | 1.628813605                                        | 0.629870319 | 0.52257391  |                |                      |
| 0.584720733                                                           |                                                    |             |             |                |                      |
| ENSG00000280035                                                       | 10.58041524                                        | 7.830768638 | 14.88645864 | 0              |                      |
| 0                                                                     | 0                                                  | 11.09921417 | 0           | 5.813969042    |                      |

|                                      |                                                                                                           |                  |             |                |             |                 |
|--------------------------------------|-----------------------------------------------------------------------------------------------------------|------------------|-------------|----------------|-------------|-----------------|
| 0.008812508                          | 1                                                                                                         | AC011676.5       | 8           | 141224288      |             |                 |
| 141226947                            | -                                                                                                         | 2660             | TEC         | TEC            | -           | 11 9            |
| 16                                   | 0                                                                                                         | 0                | 0           | 0.19994579     |             | 0.147441408     |
| 0.280791775                          |                                                                                                           | 0                | 0           | 0              |             |                 |
| ENSG00000131462                      | 1647.65921                                                                                                |                  | 1660.122951 |                | 1915.701147 |                 |
| 2168.872098                          | 2558.769522                                                                                               |                  | 2072.524536 |                | 1741.161103 |                 |
| 2266.722052                          | -0.380165261                                                                                              |                  | 0.008814614 |                | 1           | TUBG1 17        |
| 42609676                             |                                                                                                           | 42615234         | +           | 2411           |             | protein_coding  |
| tubulin gamma 1                      | [Source:HGNC Symbol;Acc:HGNC:12417]                                                                       |                  |             |                |             | -               |
| 1713                                 | 1908                                                                                                      | 2059             | 1968        | 2111           | 2245        | 34.35273894     |
| 34.48575653                          |                                                                                                           | 39.86623037      |             | 45.35654106    |             | 53.81934192     |
| 43.29623709                          |                                                                                                           |                  |             |                |             |                 |
| ENSG00000149806                      | 5606.658221                                                                                               |                  | 5729.512387 |                | 7595.815523 |                 |
| 7862.161355                          | 7821.762068                                                                                               |                  | 8409.187527 |                | 6310.662044 |                 |
| 8031.036983                          | -0.34786052                                                                                               |                  | 0.008829227 |                | 0.126644221 | FAU             |
| 11                                   | 65120628                                                                                                  |                  | 65122473    |                | -           | 1846            |
| protein_coding                       | "FAU, ubiquitin like and ribosomal protein S30 fusion [Source:HGNC Symbol;Acc:HGNC:3597]"                 |                  |             |                | 5829        | 6585 8164       |
| 7134                                 | 6453                                                                                                      | 9109             | 152.6734695 |                | 155.4471201 |                 |
| 206.4511637                          | 214.7402488                                                                                               |                  | 214.8707643 |                | 229.4404699 |                 |
| ENSG00000213999                      | 38.47423724                                                                                               |                  | 21.75213511 |                | 12.09524765 | 0               |
| 4.848450065                          | 0                                                                                                         |                  | 24.10720666 |                | 1.616150022 |                 |
| 3.961948501                          | 0.008833317                                                                                               |                  | 1           | MEF2B          | 19          | 19145568        |
| 19170289                             | -                                                                                                         |                  | 1848        | protein_coding |             | myocyte         |
| enhancer factor 2B                   | [Source:HGNC Symbol;Acc:HGNC:6995]                                                                        |                  |             |                | SRF         | 40              |
| 25                                   | 13                                                                                                        | 0                | 4           | 0              | 1.046548214 |                 |
| 0.589517416                          | 0.328388108                                                                                               |                  | 0           | 0.133047091    | 0           |                 |
| ENSG00000053900                      | 544.4104569                                                                                               |                  | 730.0016542 |                | 654.0737766 |                 |
| 542.2180245                          | 345.4520671                                                                                               |                  | 345.2668938 |                | 642.8286292 |                 |
| 410.9789951                          | 0.645894542                                                                                               |                  | 0.008837082 |                | 1           | ANAPC4 4        |
| 25377213                             |                                                                                                           | 25418498         | +           | 7494           |             | protein_coding  |
| anaphase promoting complex subunit 4 | [Source:HGNC Symbol;Acc:HGNC:19990]                                                                       |                  |             |                | 566         | 839 703 492 285 |
| 374                                  | 3.651774561                                                                                               |                  | 4.878730965 |                | 4.379128328 |                 |
| 3.648072474                          | 2.337644852                                                                                               |                  | 2.32053932  |                |             |                 |
| ENSG00000275882                      | 366.4671097                                                                                               |                  | 54.81538047 |                | 31.63372462 |                 |
| 25.34759057                          | 44.8481631                                                                                                |                  | 50.7745432  |                | 150.9720716 |                 |
| 40.32343229                          | 1.902819971                                                                                               |                  | 0.008849654 |                | 1           | IKBKGP1 X       |
| 154639978                            |                                                                                                           | 154648275        | -           | 1073           |             |                 |
| unprocessed_pseudogene               | inhibitor of nuclear factor kappa B kinase subunit gamma pseudogene 1 [Source:HGNC Symbol;Acc:HGNC:24455] |                  |             |                |             | -               |
| 381                                  | 63                                                                                                        | 34               | 23          | 37             | 55          | 17.16826745     |
| 2.558582501                          |                                                                                                           | 1.479194321      |             | 1.191077876    |             | 2.119577801     |
| 2.383383814                          |                                                                                                           |                  |             |                |             |                 |
| ENSG00000285756                      | 17.31340676                                                                                               |                  | 18.27179349 |                | 0.930403665 | 0               |
| 0                                    | 0                                                                                                         |                  | 12.17186797 |                | 0           | 5.947574799     |
| 0.008918013                          | 1                                                                                                         | BX890604.2       | X           | 3817528        | 3937855     | -               |
| 14235                                | lincRNA                                                                                                   | novel transcript |             | -              | 18          | 21              |
| 1                                    | 0                                                                                                         | 0                | 0           | 0.061138707    |             | 0.064286595     |
| 0.003279356                          |                                                                                                           | 0                | 0           | 0              |             |                 |

|                                                                   |              |             |             |                |                      |                  |
|-------------------------------------------------------------------|--------------|-------------|-------------|----------------|----------------------|------------------|
| ENSG00000142513                                                   | 50.97836434  |             | 10.44102485 |                | 38.14655027          | 0                |
|                                                                   | 8.484787614  | 0           | 33.18864649 |                | 2.828262538          |                  |
| 3.59762167                                                        | 0.008958455  |             | 1           | ACP4           | 19                   | 50790415         |
|                                                                   | 50795224     | +           | 1347        | protein_coding | acid                 |                  |
| phosphatase 4 [Source:HGNC Symbol;Acc:HGNC:14376]                 |              |             |             |                | -                    | 53               |
|                                                                   | 12           | 41          | 0           | 7              | 0                    | 1.902433524      |
| 0.388214943                                                       | 1.420896017  |             | 0           | 0.319431547    |                      | 0                |
| ENSG00000129682                                                   | 7.694847448  |             | 39.15384319 |                | 35.35533928          |                  |
| 52.89931946                                                       | 119.9991391  |             | 106.164954  |                | 27.40134331          |                  |
| 93.02113751                                                       | -1.760698604 |             | 0.008969113 |                | 1                    | FGF13 X          |
|                                                                   | 138614731    | 139222777   |             | -              | 20681                | protein_coding   |
| fibroblast growth factor 13 [Source:HGNC Symbol;Acc:HGNC:3670]    |              |             |             |                |                      |                  |
|                                                                   | -            | 8           | 45          | 38             | 48                   | 99 115           |
| 0.018703362                                                       | 0.094819918  |             | 0.085774481 |                | 0.128967935          |                  |
| 0.294246307                                                       | 0.25855761   |             |             |                |                      |                  |
| ENSG00000253311                                                   | 0            | 0           | 0           | 15.42896818    |                      | 8.484787614      |
|                                                                   | 7.385388102  | 0           | 10.43304796 |                | -5.945530081         |                  |
| 0.008979076                                                       | 1            | LINC01847   |             | 5              | 159698586            |                  |
| 159937766                                                         | -            | 7553        | antisense   |                | long intergenic non- |                  |
| protein coding RNA 1847 [Source:HGNC Symbol;Acc:HGNC:52662]       |              |             |             |                |                      | -                |
|                                                                   | 0            | 0           | 0           | 14             | 7                    | 8 0 0            |
|                                                                   | 0            | 0.102996056 |             | 0.056967337    |                      | 0.049249465      |
| ENSG00000117632                                                   | 4419.728003  |             | 5915.710663 |                | 5403.784487          |                  |
| 7047.732249                                                       | 6986.616544  |             | 6009.859568 |                | 5246.407718          |                  |
| 6681.402787                                                       | -0.3486018   |             | 0.009012441 |                | 0.127724303          | STMN1            |
|                                                                   | 1            | 25884181    |             | 25906991       | -                    | 6261             |
| protein_coding stathmin 1 [Source:HGNC Symbol;Acc:HGNC:6510]      |              |             |             |                |                      | -                |
|                                                                   | 4595         | 6799        | 5808        | 6395           | 5764                 | 6510 35.48485447 |
|                                                                   | 47.32165611  |             | 43.3040923  |                | 56.75562214          | 56.58842786      |
|                                                                   | 48.34686332  |             |             |                |                      |                  |
| ENSG00000185278                                                   | 1124.409583  |             | 877.0460875 |                | 803.8687667          |                  |
|                                                                   | 715.2428819  |             | 665.4497715 |                | 580.6761395          | 935.1081458      |
| 653.7895976                                                       | 0.516689837  |             | 0.009014186 |                | 1                    | ZBTB37 1         |
|                                                                   | 173868082    | 173903549   |             | +              | 19464                | protein_coding   |
| zinc finger and BTB domain containing 37 [Source:HGNC             |              |             |             |                |                      |                  |
| Symbol;Acc:HGNC:28365]                                            | ZBTB         | 1169        | 1008        |                | 864                  | 649 549          |
|                                                                   | 629          | 2.903913206 |             | 2.256768618    |                      | 2.072180977      |
| 1.852783372                                                       | 1.73375453   |             | 1.502621393 |                |                      |                  |
| ENSG00000204248                                                   | 108.6897202  |             | 44.37435562 |                | 56.75462358          | 0                |
|                                                                   | 15.75746271  | 24.00251133 |             | 69.93956646    |                      | 13.25332468      |
|                                                                   | 2.39212078   | 0.0090346   |             | 1              | COL11A2              | 6                |
| 33162681                                                          | 33192499     |             | -           | 6740           |                      | protein_coding   |
| collagen type XI alpha 2 chain [Source:HGNC Symbol;Acc:HGNC:2187] |              |             |             |                |                      |                  |
|                                                                   | -            | 113         | 51          | 61             | 0                    | 13 26            |
| 0.810624571                                                       | 0.329737907  |             | 0.422489553 |                | 0                    | 0.118557987      |
|                                                                   | 0.179367795  |             |             |                |                      |                  |
| ENSG00000168939                                                   | 58.67321179  |             | 92.22905285 |                | 108.8572288          |                  |
|                                                                   | 120.1255379  |             | 193.9380026 |                | 248.3336749          | 86.58649782      |
| 187.4657385                                                       | -1.114916311 |             | 0.009042724 |                | 1                    | SPRY3 X          |
|                                                                   | 155767812    | 155782459   |             | +              | 9019                 | protein_coding   |

|                                                                |              |             |             |             |             |                            |
|----------------------------------------------------------------|--------------|-------------|-------------|-------------|-------------|----------------------------|
| sprouty RTK signaling antagonist 3 [Source:HGNC                |              |             |             |             |             |                            |
| Symbol;Acc:HGNC:11271]                                         | -            | 61          | 106         | 117         | 109         | 160                        |
| 269                                                            | 0.327018758  | 0.512160494 | 0.605582771 |             |             |                            |
| 0.671552785                                                    | 1.090458033  | 1.386835376 |             |             |             |                            |
| ENSG00000136271                                                | 6367.486263  | 5419.761983 | 5199.095681 |             |             |                            |
| 5886.151359                                                    | 7595.097027  | 8680.60054  | 5662.114642 |             |             |                            |
| 7387.282975                                                    | -0.383856531 | 0.00904366  | 0.127724303 |             |             | DDX56                      |
| 7                                                              | 44565417     | 44575051    | -           |             | 4068        |                            |
| protein_coding DEAD-box helicase 56 [Source:HGNC               |              |             |             |             |             |                            |
| Symbol;Acc:HGNC:18193]                                         | -            | 6620        | 6229        | 5588        | 5341        | 6266                       |
| 9403                                                           | 78.68252016  | 66.72613724 | 64.12413046 |             |             |                            |
| 72.95476744                                                    | 94.67968547  | 107.4772412 |             |             |             |                            |
| ENSG00000252743                                                | 0            | 0           | 2.791210996 | 7.714484088 |             |                            |
| 25.45436284                                                    | 24.00251133  | 0.930403665 |             |             |             |                            |
| 19.05711942                                                    | -4.362883033 | 0.009155585 | 1           |             | RNU6-850P   |                            |
| 6                                                              | 31756951     | 31757053    | -           |             | 103         | snRNA                      |
| "RNA, U6 small nuclear 850, pseudogene [Source:HGNC            |              |             |             |             |             |                            |
| Symbol;Acc:HGNC:47813]"                                        | -            | 0           | 0           | 3           | 7           | 21                         |
| 26                                                             | 0            | 0           | 1.359659201 | 3.776355392 |             |                            |
| 12.53226098                                                    | 11.73727125  |             |             |             |             |                            |
| ENSG00000239306                                                | 1882.352057  | 1505.247749 | 1870.111367 |             |             |                            |
| 2054.256906                                                    | 2432.70982   | 2387.326704 | 1752.570391 |             |             |                            |
| 2291.431143                                                    | -0.386973746 | 0.009159678 | 1           |             | RBM14       | 11                         |
| 66616582                                                       | 66627347     | +           | 3937        |             |             | protein_coding             |
| RNA binding motif protein 14 [Source:HGNC                      |              |             |             |             |             |                            |
| Symbol;Acc:HGNC:14219]                                         | -            | 1957        | 1730        | 2010        | 1864        | 2007                       |
| 2586                                                           | 24.03403157  | 19.1486996  | 23.83288835 |             |             |                            |
| 26.30828493                                                    | 31.3349725   | 30.54176449 |             |             |             |                            |
| ENSG00000163481                                                | 870.4796175  | 948.3930906 | 879.2314636 |             |             |                            |
| 994.0663782                                                    | 1307.869405  | 1434.611639 | 899.3680572 |             |             |                            |
| 1245.515807                                                    | -0.470022286 | 0.009162733 | 1           |             | RNF25       | 2                          |
| 218663864                                                      | 218672411    | -           | 2323        |             |             | protein_coding             |
| ring finger protein 25 [Source:HGNC Symbol;Acc:HGNC:14662]     |              |             |             |             |             |                            |
| -                                                              | 905          | 1090        | 945         | 902         | 1079        | 1554                       |
| 18.83651631                                                    | 20.44729609  | 18.99016047 | 21.5759224  |             |             |                            |
| 28.55088634                                                    | 31.10518744  |             |             |             |             |                            |
| ENSG00000144554                                                | 401.0939232  | 415.0307378 | 365.6486404 |             |             |                            |
| 922.4318831                                                    | 512.7235944  | 481.8965736 | 393.9244338 |             |             |                            |
| 639.0173504                                                    | -0.697543995 | 0.009214089 | 1           |             | FANCD2      | 3                          |
| 10026414                                                       | 10101930     | +           | 8378        |             |             | protein_coding             |
| FA complementation group D2 [Source:HGNC Symbol;Acc:HGNC:3585] |              |             |             |             |             |                            |
| -                                                              | 417          | 477         | 393         | 837         | 423         | 522                        |
| 2.406561228                                                    | 2.481056308  | 2.189768631 | 5.551331288 |             |             |                            |
| 3.103468713                                                    | 2.897084517  |             |             |             |             |                            |
| ENSG00000239264                                                | 396.2846435  | 395.8888589 | 544.2861441 |             |             |                            |
| 300.8648794                                                    | 190.3016651  | 312.0326473 | 445.4865489 |             |             |                            |
| 267.7330639                                                    | 0.732627843  | 0.009216584 | 1           |             | TXNDC5      | 6                          |
| 7881517                                                        | 7910814      | -           | 4387        |             |             | protein_coding thioredoxin |
| domain containing 5 [Source:HGNC Symbol;Acc:HGNC:21073]        |              |             |             |             |             |                            |
| -                                                              | 455          | 585         | 273         | 157         | 338         | 412                        |
| 455                                                            | 585          | 273         | 157         | 338         | 4.540783526 |                            |



|                                    |                      |                |               |                |                |             |
|------------------------------------|----------------------|----------------|---------------|----------------|----------------|-------------|
| 4.51962456                         | 6.224927067          | 3.457857217    | 2.199780653   |                |                |             |
| 3.582449557                        |                      |                |               |                |                |             |
| ENSG00000143368                    | 5657.636586          | 5310.131222    | 5542.414634   |                |                |             |
| 6050.359663                        | 6923.586693          | 7357.692896    | 5503.394147   |                |                |             |
| 6777.213084                        | -0.300493841         | 0.009228026    | 0.128426108   | SF3B4          |                |             |
| 1                                  | 149923317            | 149928344      | -             | 2245           |                |             |
| protein_coding                     | splicing factor      | 3b subunit 4   | [Source:HGNC  |                |                |             |
| Symbol;Acc:HGNC:10771]             | -                    | 5882           | 6103          | 5957           | 5490           | 5712        |
| 7970                               | 126.6805357          | 118.4637899    | 123.8674767   |                |                |             |
| 135.8839124                        | 156.3936853          | 165.0718407    |               |                |                |             |
| ENSG00000279948                    | 35.58866945          | 13.05128106    | 13.02565131   |                |                |             |
| 3.306207466                        | 0                    | 0              | 20.55520061   | 1.102069155    |                |             |
| 4.236232456                        | 0.009231923          | 1              | AC008895.1    | 19             |                |             |
| 46946535                           | 46949156             | +              | 2622          | TEC            | TEC            | -           |
| 37                                 | 15                   | 14             | 3             | 0              | 0              | 0.682291959 |
| 0.249297067                        | 0.249253568          | 0.063577085    | 0             | 0              |                |             |
| ENSG00000170889                    | 13992.11823          | 14743.59717    | 19045.36303   |                |                |             |
| 17481.02094                        | 21299.24114          | 22451.57983    | 15927.02614   |                |                |             |
| 20410.61397                        | -0.35786694          | 0.00923325     | 0.128426108   | RPS9           |                |             |
| 19                                 | 54200742             | 54249003       | +             | 4371           |                |             |
| protein_coding                     | ribosomal protein S9 | [Source:HGNC   |               |                |                |             |
| Symbol;Acc:HGNC:10442]             | -                    | 14547          | 16945         | 20470          | 15862          | 17572       |
| 24320                              | 160.9140067          | 168.9348943    | 218.6165679   |                |                |             |
| 201.6458009                        | 247.1085363          | 258.7103373    |               |                |                |             |
| ENSG00000147854                    | 1549.549905          | 1741.910979    | 1634.71924    |                |                |             |
| 1439.302317                        | 1201.203504          | 988.7188321    | 1642.060041   |                |                |             |
| 1209.741551                        | 0.441495715          | 0.00925557     | 1             | UHRF2          | 9              |             |
| 6413151                            | 6507054              | +              | 9919          | protein_coding | ubiquitin like |             |
| with PHD and ring finger domains 2 | [Source:HGNC         |                |               |                |                |             |
| Symbol;Acc:HGNC:12557]             | -                    | 1611           | 2002          | 1757           | 1306           | 991         |
| 1071                               | 7.852878293          | 8.795383503    | 8.268941264   |                |                |             |
| 7.31622967                         | 6.141198348          | 5.020565053    |               |                |                |             |
| ENSG00000260300                    | 0                    | 0              | 0             | 4.408276622    | 0              |             |
| 36.003767                          | 0                    | 13.47068121    | -6.319142918  | 0.00926013     |                |             |
| 1                                  | AC009119.2           | 16             | 83908132      | 83951445       |                |             |
| +                                  | 3055                 | protein_coding | novel protein | -              | 0              |             |
| 0                                  | 0                    | 4              | 0             | 39             | 0              | 0           |
| 0.072754661                        | 0                    | 0.59358704     |               |                |                |             |
| ENSG00000017483                    | 50.97836434          | 60.03589289    | 32.56412828   |                |                |             |
| 5.510345777                        | 3.636337549          | 19.38664377    | 47.85946184   |                |                |             |
| 9.511109031                        | 2.310759765          | 0.009282135    | 1             | SLC38A5 X      |                |             |
| 48458537                           | 48470256             | -              | 4014          | protein_coding |                |             |
| solute carrier family 38 member 5  | [Source:HGNC         |                |               |                |                |             |
| Symbol;Acc:HGNC:18070]             | -                    | 53             | 69            | 35             | 5              | 3           |
| 21                                 | 0.638410054          | 0.749083654    | 0.407039646   |                |                |             |
| 0.06921571                         | 0.045940027          | 0.243261256    |               |                |                |             |
| ENSG00000164300                    | 819.5012532          | 826.581134     | 653.143373    |                |                |             |
| 609.4442429                        | 504.2388068          | 476.3575326    | 766.4085867   |                |                |             |
| 530.0135274                        | 0.532522643          | 0.009285068    | 1             | SERINC5        | 5              |             |
| 80111651                           | 80256079             | -              | 9570          | protein_coding |                |             |

|                                       |                                                              |              |             |                      |             |                                |
|---------------------------------------|--------------------------------------------------------------|--------------|-------------|----------------------|-------------|--------------------------------|
|                                       | serine incorporator 5 [Source:HGNC Symbol;Acc:HGNC:18825]    |              |             |                      |             |                                |
|                                       | -                                                            | 852          | 950         | 702                  | 553         | 416 516                        |
| 4.304561068                           |                                                              | 4.325838139  |             | 3.424295303          |             | 3.210888592                    |
| 2.671952621                           |                                                              | 2.507083404  |             |                      |             |                                |
| ENSG00000109084                       |                                                              | 1403.347803  |             | 1308.608448          |             | 1352.806929                    |
| 1708.207191                           |                                                              | 1744.229911  |             | 1740.182071          |             | 1354.92106                     |
| 1730.873058                           |                                                              | -0.353378537 |             | 0.009353678          |             | 1 TMEM97 17                    |
|                                       | 28319095                                                     |              | 28328685    | +                    | 3034        | protein_coding                 |
|                                       | transmembrane protein 97 [Source:HGNC Symbol;Acc:HGNC:28106] |              |             |                      |             |                                |
|                                       | -                                                            | 1459         | 1504        | 1454                 | 1550        | 1439 1885                      |
| 23.2509623                            |                                                              | 21.6018456   |             | 22.37148772          |             | 28.38756655                    |
| 29.15362597                           |                                                              | 28.88862     |             |                      |             |                                |
| ENSG00000225282                       |                                                              | 29.81753386  |             | 12.18119566          | 0           | 0 0                            |
|                                       | 0                                                            | 13.99957651  |             | 0                    | 6.148675513 | 0.009436989                    |
|                                       | 1                                                            | AP000350.2   |             | 22                   | 23926900    | 23929574                       |
|                                       | +                                                            | 1763         |             | processed_pseudogene |             | kelch-like 5                   |
| (Drosophila) (KLHL5) pseudogene       | -                                                            |              |             | 31                   | 14          | 0 0                            |
|                                       | 0                                                            | 0            | 0.85017944  |                      | 0.346046389 | 0 0                            |
|                                       | 0                                                            | 0            |             |                      |             |                                |
| ENSG00000167548                       |                                                              | 5674.949993  |             | 2779.922867          |             | 5098.612085                    |
| 3283.064014                           |                                                              | 2831.494838  |             | 3351.119851          |             | 4517.828315                    |
| 3155.226234                           |                                                              | 0.517650739  |             | 0.009468354          |             | 0.130417851 KMT2D              |
|                                       | 12                                                           | 49018975     |             | 49059774             |             | - 20485                        |
|                                       | protein_coding lysine methyltransferase 2D [Source:HGNC      |              |             |                      |             |                                |
|                                       | Symbol;Acc:HGNC:7133]                                        |              |             |                      |             |                                |
|                                       | -                                                            |              |             | 5900                 | 3195        | 5480 2979 2336                 |
|                                       | 3630                                                         | 13.92570721  |             | 6.796627869          |             | 12.4879349                     |
| 8.08065525                            |                                                              | 7.009454651  |             | 8.239515496          |             |                                |
| ENSG00000099960                       |                                                              | 21.16083048  |             | 3.480341617          |             | 9.304036652 0                  |
|                                       | 0                                                            | 0            | 11.31506958 |                      | 0           | 5.840937952                    |
| 0.009504261                           |                                                              | 1            | SLC7A4      | 22                   | 21028718    | 21032840                       |
|                                       | -                                                            | 2447         |             | protein_coding       |             | solute carrier family 7 member |
| 4 [Source:HGNC Symbol;Acc:HGNC:11062] |                                                              |              |             | -                    | 22          | 4 10                           |
|                                       | 0                                                            | 0            | 0           | 0.434700288          |             | 0.071233555                    |
| 0.190770873                           |                                                              | 0            | 0           | 0                    |             |                                |
| ENSG00000175866                       |                                                              | 2001.622192  |             | 1625.319535          |             | 1965.942945                    |
| 1887.844463                           |                                                              | 3009.675378  |             | 2796.29257           |             | 1864.294891                    |
| 2564.604137                           |                                                              | -0.460196756 |             | 0.009508868          |             | 1 BAIAP2 17                    |
|                                       | 81035122                                                     |              | 81117432    | +                    | 10288       | protein_coding                 |
|                                       | BAI1 associated protein 2 [Source:HGNC Symbol;Acc:HGNC:947]  |              |             |                      |             |                                |
|                                       | -                                                            | 2081         | 1868        | 2113                 | 1713        | 2483 3029                      |
| 9.78007851                            |                                                              | 7.912332222  |             | 9.587703109          |             | 9.252060224                    |
| 14.83519039                           |                                                              | 13.68987037  |             |                      |             |                                |
| ENSG00000146830                       |                                                              | 1251.374566  |             | 974.4956528          |             | 1411.42236                     |
| 741.6925416                           |                                                              | 728.4796223  |             | 1045.032416          |             | 1212.43086                     |
| 838.4015268                           |                                                              | 0.530916499  |             | 0.009531339          |             | 1 GIGYF1 7                     |
|                                       | 100679507                                                    |              | 100694037   | -                    | 6917        | protein_coding                 |
|                                       | GRB10 interacting GYF protein 1 [Source:HGNC                 |              |             |                      |             |                                |
|                                       | Symbol;Acc:HGNC:9126]                                        |              |             |                      |             |                                |
|                                       | -                                                            |              |             | 1301                 | 1120        | 1517 673 601                   |
|                                       | 1132                                                         | 9.094121189  |             | 7.056004429          |             | 10.23796972                    |
| 5.406414413                           |                                                              | 5.340772226  |             | 7.609562165          |             |                                |

|                 |                                                       |                        |                        |                        |                |             |       |
|-----------------|-------------------------------------------------------|------------------------|------------------------|------------------------|----------------|-------------|-------|
| ENSG00000213736 | 0                                                     | 0                      | 0                      | 0                      | 0              | 49.85136969 |       |
|                 | 0                                                     | 16.61712323            | -6.621170699           | 0.009552872            | 1              |             |       |
| AC026310.1      | 12                                                    | 24967127               | 24967504               | -                      |                |             |       |
| 378             | processed_pseudogene                                  | brain                  | protein I3 (BR13)      |                        |                |             |       |
| pseudogene      | -                                                     | 0                      | 0                      | 0                      | 0              | 54          |       |
|                 | 0                                                     | 0                      | 0                      | 0                      | 6.642521643    |             |       |
| ENSG00000149600 | 594.4269653                                           | 723.0409709            | 441.941741             |                        |                |             |       |
| 846.3891114     | 959.9931129                                           | 792.0828739            | 586.4698924            |                        |                |             |       |
| 866.1550327     | -0.561792494                                          | 0.009627576            | 1                      | COMMD7                 | 20             |             |       |
| 32702691        | 32743997                                              | -                      | 2584                   | protein_coding         |                |             |       |
|                 | COMM domain containing 7 [Source:HGNC                 | Symbol;Acc:HGNC:16223] |                        |                        |                |             |       |
|                 | -                                                     | 618                    | 831                    | 475                    | 768            | 792         | 858   |
| 11.56370975     | 14.01416131                                           | 8.581182455            | 16.51508276            |                        |                |             |       |
| 18.83996243     | 15.43923568                                           |                        |                        |                        |                |             |       |
| ENSG00000267128 | 11.54227117                                           | 3.480341617            | 18.6080733             | 0                      |                |             |       |
|                 | 0                                                     | 11.2102287             | 0                      | 5.827920253            |                |             |       |
| 0.009628683     | 1                                                     | RNF157-AS1             | 17                     | 76140556               |                |             |       |
| 76154650        | +                                                     | 2283                   | antisense              | RNF157 antisense RNA 1 |                |             |       |
|                 | [Source:HGNC                                          | Symbol;Acc:HGNC:44127] | -                      | 12                     | 4              | 20          |       |
|                 | 0                                                     | 0                      | 0.254142063            | 0.076350639            |                |             |       |
| 0.408949913     | 0                                                     | 0                      | 0                      |                        |                |             |       |
| ENSG00000092621 | 7660.220634                                           | 5806.079903            | 7369.727432            |                        |                |             |       |
| 7842.32411      | 8604.786753                                           | 10336.77382            | 6945.342656            |                        |                |             |       |
| 8927.961562     | -0.362472312                                          | 0.009636515            | 0.130417851            | PHGDH                  |                |             |       |
| 1               | 119648411                                             | 119744226              | +                      | 9217                   |                |             |       |
| protein_coding  | phosphoglycerate dehydrogenase [Source:HGNC           | Symbol;Acc:HGNC:8923]  | -                      | 7964                   | 6673           | 7921        | 7116  |
|                 | 11197                                                 | 41.7775416             | 31.54932959            | 40.11774021            |                | 7099        |       |
| 42.90010899     | 47.34290999                                           | 56.48629748            |                        |                        |                |             |       |
| ENSG00000224945 | 48.09279655                                           | 65.25640532            | 49.31139426            |                        |                |             |       |
| 12.12276071     | 21.81802529                                           | 2.769520538            | 54.22019871            |                        |                |             |       |
| 12.23676885     | 2.164588244                                           | 0.009638083            | 1                      | AL353150.1             |                |             |       |
| 9               | 89088604                                              | 89109934               | -                      | 1038                   |                |             |       |
| sense_intronic  | novel transcript                                      | -                      | 50                     | 75                     | 53             |             |       |
| 11              | 18                                                    | 3                      | 2.329023482            | 3.148636369            |                |             |       |
| 2.383551566     | 0.588853655                                           | 1.065914848            | 0.134386276            |                        |                |             |       |
| ENSG00000106153 | 7918.959879                                           | 8713.035238            | 9369.164908            |                        |                |             |       |
| 9366.485752     | 11149.01092                                           | 11871.0882             | 8667.053342            |                        |                |             |       |
| 10795.52829     | -0.316863618                                          | 0.00965983             | 0.130417851            | CHCHD2                 |                |             |       |
| 7               | 56101569                                              | 56106576               | -                      | 1132                   |                |             |       |
| protein_coding  | coiled-coil-helix-coiled-coil-helix domain containing | 2 [Source:HGNC         | Symbol;Acc:HGNC:21645] | -                      | 8233           | 10014       | 10070 |
|                 | 8499                                                  | 9198                   | 12859                  | 351.6518488            | 385.4958952    |             |       |
| 415.2685864     | 417.1895736                                           | 499.4526694            | 528.1919617            |                        |                |             |       |
| ENSG00000198888 | 48197.63884                                           | 41786.72162            | 43506.60579            |                        |                |             |       |
| 41276.89815     | 63975.29861                                           | 72778.38388            | 44496.98875            |                        |                |             |       |
| 59343.52688     | -0.41540074                                           | 0.009660582            | 0.130417851            | MT-ND1                 |                |             |       |
| MT              | 3307                                                  | 4262                   | +                      | 956                    | protein_coding |             |       |
| mitochondrially | encoded NADH:ubiquinone oxidoreductase core subunit 1 | [Source:HGNC           | Symbol;Acc:HGNC:7455]  | -                      | 50109          | 48026       | 46761 |

|                                                             |                                               |                |                              |              |                |        |
|-------------------------------------------------------------|-----------------------------------------------|----------------|------------------------------|--------------|----------------|--------|
| 37454                                                       | 52780                                         | 78835          | 2534.306048                  | 2189.158074  |                |        |
| 2283.347092                                                 | 2176.969565                                   |                | 3393.585955                  | 3834.353929  |                |        |
| ENSG00000079462                                             | 1038.804405                                   |                | 1176.355467                  | 1065.312197  |                |        |
| 1355.545061                                                 | 1505.443745                                   |                | 1432.765292                  | 1093.49069   |                |        |
| 1431.251366                                                 | -0.388056068                                  |                | 0.009670649                  | 1            | PAFAH1B3       |        |
| 19                                                          | 42297033                                      |                | 42303546                     | -            | 1419           |        |
| protein_coding                                              | platelet activating factor acetylhydrolase 1b |                |                              |              |                |        |
| catalytic subunit 3 [Source:HGNC Symbol;Acc:HGNC:8576]      |                                               |                |                              | -            |                | 1080   |
| 1352                                                        | 1145                                          | 1230           | 1242                         | 1552         | 36.79955581    |        |
| 41.51957448                                                 | 37.6677021                                    |                | 48.16535434                  | 53.80053081  |                |        |
| 50.85578233                                                 |                                               |                |                              |              |                |        |
| ENSG00000275091                                             | 0                                             | 0              | 0                            | 0            | 26.66647536    |        |
| 12.00125567                                                 | 0                                             | 12.88924367    | -6.249571588                 | 0.009691477  |                |        |
| 1                                                           | AC022098.4                                    | 19             | 14006422                     | 14006773     |                |        |
| +                                                           | 352                                           | antisense      | "novel transcript, antisense |              |                |        |
| to RFX1"                                                    | -                                             | 0              | 0                            | 0            | 22             | 13     |
| 0                                                           | 0                                             | 0              | 0                            | 3.841734764  | 1.717242811    |        |
| ENSG00000176095                                             | 2083.379946                                   |                | 1992.495576                  | 2122.25076   |                |        |
| 2445.491456                                                 | 2483.618546                                   |                | 2945.846679                  | 2066.042094  |                |        |
| 2624.98556                                                  | -0.345879761                                  |                | 0.009696166                  | 1            | IP6K1          | 3      |
| 49724294                                                    | 49786542                                      |                | -                            | 5200         | protein_coding |        |
| inositol hexakisphosphate kinase 1 [Source:HGNC             |                                               |                |                              |              |                |        |
| Symbol;Acc:HGNC:18360]                                      | -                                             | 2166           | 2290                         | 2281         | 2219           | 2049   |
| 3191                                                        | 20.13985434                                   |                | 19.19069647                  | 20.47707767  |                |        |
| 23.71188075                                                 | 24.2206601                                    |                | 28.53346268                  |              |                |        |
| ENSG00000135604                                             | 0                                             | 0              | 0                            | 8.816553243  | 9.69690013     |        |
| 12.00125567                                                 | 0                                             |                | 10.17156968                  | -5.910070226 |                |        |
| 0.009726482                                                 | 1                                             | STX11          | 6                            | 144150526    | 144188370      |        |
| +                                                           | 1926                                          | protein_coding | syntaxin 11 [Source:HGNC     |              |                |        |
| Symbol;Acc:HGNC:11429]                                      | -                                             | 0              | 0                            | 0            | 8              | 8      |
| 13                                                          | 0                                             | 0              | 0                            | 0.230805284  | 0.255317783    |        |
| 0.313847077                                                 |                                               |                |                              |              |                |        |
| ENSG00000214029                                             | 277.976364                                    |                | 190.5487035                  | 307.9636132  |                |        |
| 153.1876126                                                 | 163.6351897                                   |                | 96.01004532                  | 258.8295603  |                |        |
| 137.6109492                                                 | 0.91387465                                    |                | 0.009799025                  | 1            | ZNF891         | 12     |
| 133106817                                                   | 133130473                                     |                | -                            | 15455        | protein_coding |        |
| zinc finger protein 891 [Source:HGNC Symbol;Acc:HGNC:38709] |                                               |                |                              |              |                |        |
| zf-C2H2                                                     | 289                                           | 219            | 331                          | 139          | 135            | 104    |
| 0.904128272                                                 | 0.617495367                                   |                | 0.999781325                  | 0.49975579   |                |        |
| 0.536923137                                                 | 0.31289264                                    |                |                              |              |                |        |
| ENSG00000279865                                             | 20.19897455                                   |                | 2.610256213                  | 11.16484398  | 0              |        |
| 0                                                           | 0                                             | 11.32469158    | 0                            | 5.842147554  |                |        |
| 0.009825263                                                 | 1                                             | AC006511.3     | 12                           | 8080381      | 8082163        | -      |
| 1783                                                        | TEC                                           | TEC            | -                            | 21           | 3              | 12     |
| 0                                                           | 0                                             | 0.569467794    | 0.073321022                  | 0.314178122  |                |        |
| 0                                                           | 0                                             | 0              |                              |              |                |        |
| ENSG00000116521                                             | 4408.185732                                   |                | 5043.885088                  | 5284.692818  |                |        |
| 5459.650596                                                 | 6244.803684                                   |                | 6768.708195                  | 4912.254546  |                |        |
| 6157.720825                                                 | -0.326080311                                  |                | 0.00983943                   | 0.131652932  |                | SCAMP3 |
| 1                                                           | 155255979                                     |                | 155262430                    | -            | 2442           |        |

|                        |                                      |                        |                                     |                        |              |            |                |
|------------------------|--------------------------------------|------------------------|-------------------------------------|------------------------|--------------|------------|----------------|
| protein_coding         | secretory carrier membrane protein 3 | [Source:HGNC           |                                     |                        |              |            |                |
| Symbol;Acc:HGNC:10565] | -                                    |                        | 4583                                | 5797                   | 5680         | 4954       | 5152           |
|                        | 7332                                 | 90.74138718            | 103.4466041                         |                        | 108.5797186  |            |                |
| 112.7255561            |                                      | 129.6813596            | 139.6071993                         |                        |              |            |                |
| ENSG00000118600        |                                      | 438.6063045            | 406.3298838                         |                        | 363.7878331  |            |                |
| 300.8648794            |                                      | 241.2103907            | 219.715296                          |                        | 402.9080071  |            |                |
| 253.9301887            |                                      | 0.666690848            | 0.009888365                         |                        | 1            | RXYLT1     | 12             |
|                        | 63779803                             |                        | 63809558                            | +                      | 7804         |            | protein_coding |
|                        | ribitol xylosyltransferase 1         | [Source:HGNC           |                                     |                        |              |            |                |
| Symbol;Acc:HGNC:13530] | -                                    |                        | 456                                 | 467                    | 391          | 273        | 199            |
|                        | 238                                  | 2.825197403            | 2.607703546                         |                        | 2.338867033  |            |                |
| 1.943826193            |                                      | 1.567412031            | 1.418047291                         |                        |              |            |                |
| ENSG00000167552        |                                      | 8083.437244            | 10991.78891                         |                        | 9519.890302  |            |                |
| 12173.45589            |                                      | 14938.07465            | 10229.68569                         |                        | 9531.705486  |            |                |
| 12447.07208            |                                      | -0.384826321           | 0.009895482                         |                        | 0.131652932  |            | TUBA1A         |
|                        | 12                                   | 49184796               | 49189324                            |                        | -            | 3421       |                |
| protein_coding         | tubulin alpha 1a                     | [Source:HGNC           |                                     |                        |              |            |                |
| Symbol;Acc:HGNC:20766] | -                                    |                        | 8404                                | 12633                  | 10232        | 11046      | 12324          |
|                        |                                      |                        |                                     |                        | 11081        |            |                |
| 118.7775016            |                                      | 160.9207395            | 139.6218837                         |                        | 179.4171726  |            |                |
| 221.4348517            |                                      | 150.6110717            |                                     |                        |              |            |                |
| ENSG00000169403        | 0                                    | 0                      | 0                                   |                        | 8.816553243  |            | 30.30281291    |
|                        | 0                                    | 0                      | 13.03978872                         |                        | -6.264172501 |            | 0.009967173    |
|                        | 1                                    | PTAFR                  | 1                                   |                        | 28147166     |            | 28193936       |
|                        | 4706                                 | protein_coding         | platelet activating factor receptor |                        |              |            |                |
| [Source:HGNC           | Symbol;Acc:HGNC:9582]                |                        |                                     |                        | -            | 0          | 0              |
|                        |                                      |                        |                                     |                        | 0            | 0          | 0              |
|                        | 8                                    | 25                     | 0                                   | 0                      | 0            |            | 0.094460471    |
|                        | 0.326539291                          |                        | 0                                   |                        |              |            |                |
| ENSG00000115760        |                                      | 2951.935852            | 1967.263099                         |                        | 2327.86997   |            |                |
| 2015.684485            |                                      | 1596.352184            | 1742.028419                         |                        | 2415.68964   |            |                |
| 1784.688363            |                                      | 0.436492627            | 0.009987366                         |                        | 1            | BIRC6      | 2              |
|                        | 32357028                             |                        | 32618899                            | +                      | 17858        |            | protein_coding |
|                        | baculoviral IAP repeat containing 6  | [Source:HGNC           |                                     |                        |              |            |                |
| Symbol;Acc:HGNC:13516] | -                                    |                        | 3069                                | 2261                   | 2502         | 1829       | 1317           |
|                        | 1887                                 | 8.30931621             | 5.517296727                         |                        | 6.540342964  |            |                |
| 5.691056936            |                                      | 4.533152365            | 4.913263993                         |                        |              |            |                |
| ENSG00000223653        | 0                                    | 0                      | 0.930403665                         |                        | 11.02069155  |            |                |
| 13.33323768            |                                      | 12.92442918            | 0.310134555                         |                        |              |            |                |
| 12.42611947            |                                      | -5.236478049           | 0.010002796                         |                        | 1            | AL078459.1 |                |
|                        | 1                                    | 85276715               | 85448124                            |                        | +            | 2277       |                |
| antisense              | novel transcript                     |                        |                                     |                        | -            | 0          | 0              |
|                        |                                      |                        |                                     |                        |              |            | 1              |
|                        | 10                                   | 11                     | 14                                  |                        | 0            | 0          | 0.020501376    |
| 0.244033255            |                                      | 0.296945682            | 0.285888064                         |                        |              |            |                |
| ENSG00000069188        |                                      | 13.46598303            | 5.220512425                         |                        | 13.95605498  |            | 0              |
|                        | 0                                    | 0                      | 10.88085015                         |                        | 0            |            | 5.784933836    |
| 0.010058606            |                                      | 1                      | SDK2                                | 17                     | 73334384     |            | 73644089       |
|                        | -                                    | 11607                  | protein_coding                      | sidekick cell adhesion |              |            |                |
| molecule 2             | [Source:HGNC                         | Symbol;Acc:HGNC:19308] | -                                   |                        |              | 14         | 6              |
|                        |                                      |                        |                                     |                        |              |            |                |
|                        | 15                                   | 0                      | 0                                   |                        | 0.058318892  |            | 0.0225263      |
|                        | 0.060327775                          |                        | 0                                   |                        | 0            |            |                |
| ENSG00000167723        |                                      | 230.8454234            | 289.7384396                         |                        | 365.6486404  |            |                |

|                                                                     |              |             |             |                |             |
|---------------------------------------------------------------------|--------------|-------------|-------------|----------------|-------------|
| 197.2703788                                                         | 179.3926524  | 98.77956586 | 295.4108345 |                |             |
| 158.4808657                                                         | 0.901294731  | 0.01011869  | 1           | TRPV3          | 17          |
| 3510502                                                             | 3557995      | -           | 9780        | protein_coding | transient   |
| receptor potential cation channel subfamily V member 3 [Source:HGNC |              |             |             |                |             |
| Symbol;Acc:HGNC:18084]                                              | -            | 240         | 333         | 393            | 179 148     |
| 107                                                                 | 1.186516012  | 1.483761085 | 1.875857014 |                |             |
| 1.017012334                                                         | 0.930186904  | 0.508716637 |             |                |             |
| ENSG00000131504                                                     | 3794.521648  | 3450.758713 | 3687.189725 |                |             |
| 4558.158027                                                         | 4287.24197   | 4503.240395 | 3644.156695 |                |             |
| 4449.546797                                                         | -0.288212516 | 0.010170056 | 0.134285642 |                | DIAPH1      |
| 5                                                                   | 141515016    | 141619055   | -           | 7375           |             |
| protein_coding diaphanous related formin 1 [Source:HGNC             |              |             |             |                |             |
| Symbol;Acc:HGNC:2876]                                               | -            | 3945        | 3966        | 3963           | 4136 3537   |
| 4878                                                                | 25.86343471  | 23.43415418 | 25.08465218 |                |             |
| 31.16237497                                                         | 29.47951915  | 30.75465004 |             |                |             |
| ENSG00000165280                                                     | 11326.81544  | 10021.64369 | 10227.92749 |                |             |
| 12401.58421                                                         | 12951.42224  | 12510.84744 | 10525.46221 |                |             |
| 12621.28463                                                         | -0.261984838 | 0.010250926 | 0.134285642 |                | VCP         |
| 9                                                                   | 35056064     | 35073249    | -           | 5438           |             |
| protein_coding valosin containing protein [Source:HGNC              |              |             |             |                |             |
| Symbol;Acc:HGNC:12666]                                              | -            | 11776       | 11518       | 10993          | 11253 10685 |
| 13552                                                               | 104.7031651  | 92.29888798 | 94.36763271 |                |             |
| 114.984992                                                          | 120.7765677  | 115.876457  |             |                |             |
| ENSG00000198576                                                     | 54.82578806  | 41.7640994  | 53.03300892 |                |             |
| 241.353145                                                          | 139.3929394  | 41.54280807 | 49.87429879 |                |             |
| 140.7629642                                                         | -1.495603993 | 0.010270361 | 1           | ARC            | 8           |
| 142611044                                                           | 142614472    | -           | 2991        | protein_coding |             |
| activity regulated cytoskeleton associated protein                  |              |             |             |                |             |
| [Source:HGNC Symbol;Acc:HGNC:648]                                   | -            |             | 57          | 48             | 57          |
| 219                                                                 | 115          | 45          | 0.921424295 | 0.699332034    |             |
| 0.889619878                                                         | 4.068550823  | 2.363354051 | 0.699563463 |                |             |
| ENSG00000136877                                                     | 1134.028143  | 1308.608448 | 1291.400287 |                |             |
| 1353.340923                                                         | 1833.926237  | 1842.654331 | 1244.678959 |                |             |
| 1676.640497                                                         | -0.429794238 | 0.010278291 | 1           | FPGS           | 9           |
| 127794597                                                           | 127814327    | +           | 3931        | protein_coding |             |
| folylpolyglutamate synthase [Source:HGNC Symbol;Acc:HGNC:3824]      |              |             |             |                |             |
| -                                                                   | 1179         | 1504        | 1388        | 1228           | 1513 1996   |
| 14.50146831                                                         | 16.67260227  | 16.48285576 | 17.35830706 |                |             |
| 23.65828419                                                         | 23.60959359  |             |             |                |             |
| ENSG00000111145                                                     | 5373.889086  | 5379.738054 | 4283.578475 |                |             |
| 4066.635183                                                         | 3809.669639  | 4114.584346 | 5012.401872 |                |             |
| 3996.963056                                                         | 0.326508585  | 0.010312786 | 0.134285642 |                | ELK3        |
| 12                                                                  | 96194382     | 96269835    | +           | 4648           |             |
| protein_coding "ELK3, ETS transcription factor [Source:HGNC         |              |             |             |                |             |
| Symbol;Acc:HGNC:3325]"                                              | ETS          | 5587        | 6183        | 4604           | 3690 3143   |
| 4457                                                                | 58.1184159   | 57.96845491 | 46.23972381 |                |             |
| 44.11357862                                                         | 41.56479299  | 44.58692615 |             |                |             |
| ENSG00000131002                                                     | 858.9373463  | 596.0085019 | 751.7661615 |                |             |
| 562.0552693                                                         | 458.1785312  | 488.3587882 | 735.5706699 |                |             |
| 502.8641962                                                         | 0.548229657  | 0.010332645 | 1           | TXLNGY         | Y           |

|                                                                                            |                                  |                                                                           |                  |                |             |
|--------------------------------------------------------------------------------------------|----------------------------------|---------------------------------------------------------------------------|------------------|----------------|-------------|
| 19567313                                                                                   | 19606274                         | +                                                                         | 11377            |                |             |
| transcribed_unprocessed_pseudogene                                                         |                                  | "taxilin gamma pseudogene, Y-linked [Source:HGNC Symbol;Acc:HGNC:18473]"  |                  |                |             |
| 808                                                                                        | 510                              | 378                                                                       | 529              | 3.795114797    | 2.623743714 |
| 3.315351947                                                                                | 2.490889498                      | 2.042261743                                                               | 2.162016142      |                |             |
| ENSG00000279530                                                                            | 10.58041524                      | 13.05128106                                                               | 8.373632987      | 0              |             |
| 0                                                                                          | 0                                | 10.6684431                                                                | 0                | 5.757364599    |             |
| 0.010376204                                                                                | 1                                | AC092881.1                                                                | 12               | 70321542       |             |
| 70324274                                                                                   | -                                | 2733                                                                      | TEC              | TEC            | - 11 15     |
| 9                                                                                          | 0                                | 0                                                                         | 0                | 0.194605123    | 0.239171939 |
| 0.153726562                                                                                | 0                                | 0                                                                         | 0                |                |             |
| ENSG00000232729                                                                            | 23.08454234                      | 0                                                                         | 17.67766964      | 0              | 0           |
| 0                                                                                          | 13.58740399                      | 0                                                                         | 6.105112946      | 0.01039108     |             |
| 1                                                                                          | AC211433.1                       | 7                                                                         | 74688939         | 74729001       |             |
| -                                                                                          | 2847                             | processed_transcript                                                      | uncharacterized  |                |             |
| LOC101926943                                                                               | [Source:NCBI gene;Acc:101926943] | -                                                                         | 24               | 0              |             |
| 19                                                                                         | 0                                | 0                                                                         | 0                | 0.40759138     | 0           |
| 0.311538819                                                                                | 0                                | 0                                                                         | 0                |                |             |
| ENSG00000230373                                                                            | 11.54227117                      | 23.49230591                                                               | 20.46888063      |                |             |
| 2.204138311                                                                                | 1.212112516                      | 0.923173513                                                               | 18.50115257      |                |             |
| 1.44647478                                                                                 | 3.686938497                      | 0.01046518                                                                | 1                | GOLGA6L5P      |             |
| 15                                                                                         | 84507885                         | 84516814                                                                  | -                | 3899           |             |
| transcribed_unprocessed_pseudogene                                                         |                                  | "golgin A6 family-like 5, pseudogene [Source:HGNC Symbol;Acc:HGNC:30472]" |                  |                |             |
| 22                                                                                         | 2                                | 1                                                                         | 1                | 0.14880901     | 0.30176518  |
| 0.263399825                                                                                | 0.028502884                      | 0.015765005                                                               | 0.011925533      |                |             |
| ENSG00000270923                                                                            | 12.5041271                       | 16.53162268                                                               | 3.721614661      | 0              |             |
| 0                                                                                          | 0                                | 10.91912148                                                               | 0                | 5.791066069    |             |
| 0.010513975                                                                                | 1                                | TAS2R6P 7                                                                 | 141787815        | 141788640      |             |
| +                                                                                          | 826                              | processed_pseudogene                                                      | taste 2 receptor |                |             |
| member 6 pseudogene [Source:HGNC Symbol;Acc:HGNC:20616]                                    | -                                |                                                                           |                  | 13             |             |
| 19                                                                                         | 4                                | 0                                                                         | 0                | 0              | 0.760964718 |
| 1.002379443                                                                                | 0.226061175                      | 0                                                                         | 0                | 0              |             |
| ENSG00000170345                                                                            | 101.9567287                      | 160.0957144                                                               | 159.0990267      |                |             |
| 544.4221628                                                                                | 133.3323768                      | 243.7178074                                                               | 140.3838233      |                |             |
| 307.157449                                                                                 | -1.129471827                     | 0.010521147                                                               | 1                | FOS            | 14          |
| 75278774                                                                                   | 75282230                         | +                                                                         | 3238             | protein_coding |             |
| "Fos proto-oncogene, AP-1 transcription factor subunit [Source:HGNC Symbol;Acc:HGNC:3796]" |                                  | TF_bZIP                                                                   | 106              | 184            | 171         |
| 494                                                                                        | 110                              | 264                                                                       | 1.582815292      | 2.47627901     |             |
| 2.465274604                                                                                | 8.477389706                      | 2.088157253                                                               | 3.791037676      |                |             |
| ENSG00000196689                                                                            | 142.3546778                      | 87.00854042                                                               | 93.04036652      |                |             |
| 46.28690453                                                                                | 54.54506323                      | 19.38664377                                                               | 107.4678616      |                |             |
| 40.07287051                                                                                | 1.429603262                      | 0.010521671                                                               | 1                | TRPV1          | 17          |
| 3565444                                                                                    | 3609411                          | -                                                                         | 5519             | protein_coding | transient   |
| receptor potential cation channel subfamily V member 1 [Source:HGNC Symbol;Acc:HGNC:12716] |                                  | -                                                                         | 148              | 100            | 100 42 45   |
| 21                                                                                         | 1.296589612                      | 0.789583753                                                               | 0.84583498       |                |             |
| 0.42286422                                                                                 | 0.501186633                      | 0.176925291                                                               |                  |                |             |
| ENSG00000108107                                                                            | 28205.46332                      | 29720.37724                                                               | 30192.52934      |                |             |

|                                                            |                                                   |                       |                |       |  |
|------------------------------------------------------------|---------------------------------------------------|-----------------------|----------------|-------|--|
| 30125.06036                                                | 38505.17831                                       | 40552.24289           | 29372.78997    |       |  |
| 36394.16052                                                | -0.309241381                                      | 0.01052622            | 0.134686665    | RPL28 |  |
| 19                                                         | 55385345                                          | 55403250              | + 6933         |       |  |
| protein_coding                                             | ribosomal protein L28 [Source:HGNC                |                       |                |       |  |
| Symbol;Acc:HGNC:10330]                                     | -                                                 | 29324 34158           | 32451 27335    | 31767 |  |
| 43927                                                      | 204.5046687                                       | 214.6989061           | 218.500744     |       |  |
| 219.0836267                                                | 281.6452058                                       | 294.605847            |                |       |  |
| ENSG00000166226                                            | 6545.42961                                        | 6732.720858           | 7371.588239    |       |  |
| 8310.703501                                                | 8896.90587                                        | 7859.899287           | 6883.246236    |       |  |
| 8355.836219                                                | -0.279574712                                      | 0.010542191           | 0.134686665    | CCT2  |  |
| 12                                                         | 69585334                                          | 69601570              | + 4322         |       |  |
| protein_coding                                             | chaperonin containing TCP1 subunit 2 [Source:HGNC |                       |                |       |  |
| Symbol;Acc:HGNC:1615]                                      | -                                                 | 6805 7738             | 7923 7541      | 7340  |  |
| 8514                                                       | 76.12802859                                       | 78.01939182           | 85.5757924     |       |  |
| 96.95187709                                                | 104.3899423                                       | 91.59671561           |                |       |  |
| ENSG00000100401                                            | 6147.221255                                       | 4230.355235           | 4933.000233    |       |  |
| 5319.687813                                                | 6799.951216                                       | 8666.752938           | 5103.525574    |       |  |
| 6928.797322                                                | -0.441336227                                      | 0.01056366            | 0.134686665    |       |  |
| RANGAP1 22                                                 | 41245611                                          | 41286251              | - 5348         |       |  |
| protein_coding                                             | Ran GTPase activating protein 1 [Source:HGNC      |                       |                |       |  |
| Symbol;Acc:HGNC:9854]                                      | -                                                 | 6391 4862             | 5302 4827      | 5610  |  |
| 9388                                                       | 57.78014607                                       | 39.61705183           | 46.28010767    |       |  |
| 50.15311867                                                | 64.47907861                                       | 81.62302773           |                |       |  |
| ENSG00000185022                                            | 567.4949993                                       | 586.4375625           | 664.3082169    |       |  |
| 836.470489                                                 | 792.7215857                                       | 877.0148371           | 606.0802596    |       |  |
| 835.4023039                                                | -0.463316557                                      | 0.01058187            | 1 MAFF 22      |       |  |
| 38200767                                                   | 38216511                                          | + 5615                | protein_coding |       |  |
| MAF bZIP transcription factor F [Source:HGNC               |                                                   |                       |                |       |  |
| Symbol;Acc:HGNC:6780]                                      | TF_bZIP                                           | 590 674               | 714 759        | 654   |  |
| 950                                                        | 5.080465044                                       | 5.230807451           | 5.936008129    |       |  |
| 7.511108905                                                | 7.159378908                                       | 7.866922337           |                |       |  |
| ENSG00000107186                                            | 1190.777643                                       | 814.3999384           | 941.5685092    |       |  |
| 781.3670312                                                | 684.8435717                                       | 587.1383541           | 982.2486967    |       |  |
| 684.4496523                                                | 0.521458145                                       | 0.01062813            | 1 MPDZ 9       |       |  |
| 13105704                                                   | 13279590                                          | - 11273               | protein_coding |       |  |
| multiple PDZ domain crumbs cell polarity complex component |                                                   |                       |                |       |  |
| [Source:HGNC Symbol;Acc:HGNC:7208]                         | -                                                 | 1238 936              | 1012           |       |  |
| 709                                                        | 565 636                                           | 5.309851241           | 3.618219747    |       |  |
| 4.190704528                                                | 3.494771391                                       | 3.080748892           | 2.623304032    |       |  |
| ENSG00000261423                                            | 1.923711862                                       | 54.81538047           | 0 0            |       |  |
| 1.212112516                                                | 0 18.91303078                                     | 0.404037505           | 5.622808348    |       |  |
| 0.010650917                                                | 1 TMEM202-AS1                                     | 15 72407778           |                |       |  |
| 72475168                                                   | - 2713 lincRNA                                    | TMEM202 antisense RNA |                |       |  |
| 1 [Source:HGNC Symbol;Acc:HGNC:53265]                      | -                                                 | 2 63 0                |                |       |  |
| 0 1 0                                                      | 0.035643588                                       | 1.011927395           | 0              |       |  |
| 0 0.022656748                                              | 0                                                 |                       |                |       |  |
| ENSG00000183691                                            | 0 9.570939447                                     | 0 7.714484088         |                |       |  |
| 44.8481631                                                 | 56.31358428                                       | 3.190313149           |                |       |  |
| 36.29207716                                                | -3.493320484                                      | 0.010656746           | 1 NOG 17       |       |  |
| 56593699                                                   | 56595590                                          | + 1892                | protein_coding |       |  |



|                                                |                                              |                                        |             |             |             |                |
|------------------------------------------------|----------------------------------------------|----------------------------------------|-------------|-------------|-------------|----------------|
| noggin [Source:HGNC Symbol;Acc:HGNC:7866]      | -                                            | 0                                      |             |             |             |                |
| 11                                             | 0                                            | 7                                      | 37          | 61          | 0           | 0.253355392    |
| 0                                              | 0.20558383                                   |                                        | 1.202065    |             | 1.49913147  |                |
| ENSG00000169976                                | 1952.56754                                   |                                        | 1699.276794 |             | 2059.913715 |                |
| 2061.97139                                     | 2671.495986                                  |                                        | 2772.290059 |             | 1903.91935  |                |
| 2501.919145                                    | -0.394303883                                 |                                        | 0.010674352 |             | 1           | SF3B5 6        |
| 144094881                                      | 144095573                                    |                                        | -           |             | 693         | protein_coding |
| splicing factor 3b subunit 5 [Source:HGNC      |                                              |                                        |             |             |             |                |
| Symbol;Acc:HGNC:21083]                         | -                                            | 2030                                   | 1953        |             | 2214        | 1871 2204      |
| 3003                                           | 141.6328583                                  |                                        | 122.808268  |             | 149.1387222 |                |
| 150.0211867                                    | 195.4905263                                  |                                        | 201.4898232 |             |             |                |
| ENSG00000278384                                | 267.3959488                                  |                                        | 267.1162191 |             | 551.7293735 |                |
| 139.9627827                                    | 231.5134906                                  |                                        | 210.4835609 |             | 362.0805138 |                |
| 193.9866114                                    | 0.900394848                                  |                                        | 0.010693164 |             | 1           | AL354822.1     |
| GL000218.1                                     | 51867                                        | 54893                                  | -           |             | 3027        | protein_coding |
|                                                | -                                            | 278                                    | 307         | 593         | 127         | 191 228        |
| 4.440517556                                    | 4.419616154                                  |                                        | 9.14509683  |             | 2.331327806 |                |
| 3.878540283                                    | 3.502300807                                  |                                        |             |             |             |                |
| ENSG00000108465                                | 317.4124572                                  |                                        | 239.2734862 |             | 349.8317781 |                |
| 185.1476181                                    | 189.0895525                                  |                                        | 162.4785382 |             | 302.1725738 |                |
| 178.9052363                                    | 0.756757717                                  |                                        | 0.010715783 |             | 1           | CDK5RAP3       |
| 17                                             | 47967810                                     |                                        | 47981774    |             | +           | 6070           |
| protein_coding                                 | CDK5 regulatory subunit associated protein 3 |                                        |             |             |             |                |
| [Source:HGNC Symbol;Acc:HGNC:18673]            | -                                            |                                        | 330         | 275         |             | 376            |
| 168                                            | 156                                          | 176                                    | 2.628611874 |             | 1.974252063 |                |
| 2.891646432                                    | 1.537916068                                  |                                        | 1.579731461 |             | 1.348202086 |                |
| ENSG00000214078                                | 2324.805785                                  |                                        | 2443.199815 |             | 2943.797197 |                |
| 3270.941253                                    | 3643.610224                                  |                                        | 2982.77362  |             | 2570.600932 |                |
| 3299.108366                                    | -0.359678511                                 |                                        | 0.010739037 |             | 0.135147702 | CPNE1          |
| 20                                             | 35626031                                     |                                        | 35664956    |             | -           | 3608           |
| protein_coding                                 | copine 1 [Source:HGNC Symbol;Acc:HGNC:2314]  |                                        |             |             |             | -              |
| 2417                                           | 2808                                         | 3164                                   | 2968        | 3006        | 3231        | 32.39002909    |
| 33.91479313                                    | 40.93699706                                  |                                        | 45.70980951 |             | 51.2117725  |                |
| 41.63911086                                    |                                              |                                        |             |             |             |                |
| ENSG00000213593                                | 2607.591429                                  |                                        | 2359.671616 |             | 2580.939767 |                |
| 2972.280512                                    | 3261.794781                                  |                                        | 3127.711861 |             | 2516.067604 |                |
| 3120.595718                                    | -0.310672732                                 |                                        | 0.010747039 |             | 0.135147702 | TMX2           |
| 11                                             | 57712600                                     |                                        | 57740973    |             | +           | 2246           |
| protein_coding                                 | thioredoxin related transmembrane protein 2  |                                        |             |             |             |                |
| [Source:HGNC Symbol;Acc:HGNC:30739]            | -                                            |                                        | 2711        | 2712        |             | 2774           |
| 2697                                           | 2691                                         | 3388                                   | 58.36076582 |             | 52.61850818 |                |
| 57.65576523                                    | 66.72417891                                  |                                        | 73.64636331 |             | 70.13982337 |                |
| ENSG00000187726                                | 20.19897455                                  |                                        | 20.0119643  |             | 0           | 0              |
| 0                                              | 13.40364628                                  |                                        | 0           | 6.086559901 | 0.010771603 |                |
| 1                                              | DNAJB13 11                                   |                                        | 73950319    |             | 73970366    | +              |
| 3475                                           | protein_coding                               | DnaJ heat shock protein family (Hsp40) |             |             |             |                |
| member B13 [Source:HGNC Symbol;Acc:HGNC:30718] | -                                            |                                        | 21          | 23          |             |                |
| 0                                              | 0                                            | 0                                      | 0           | 0.292190238 | 0.288424152 |                |
| 0                                              | 0                                            | 0                                      | 0           |             |             |                |
| ENSG00000105364                                | 1434.127193                                  |                                        | 1417.369124 |             | 1703.569111 |                |

|                                                                     |              |                      |                           |                |             |      |
|---------------------------------------------------------------------|--------------|----------------------|---------------------------|----------------|-------------|------|
| 1768.820994                                                         | 1901.804538  | 2377.171795          | 1518.355143               |                |             |      |
| 2015.932443                                                         | -0.409469796 | 0.010799354          | 1                         | MRPL4          | 19          |      |
| 10251901                                                            | 10260045     | +                    | 4070                      | protein_coding |             |      |
| mitochondrial ribosomal protein L4 [Source:HGNC                     |              |                      |                           |                |             |      |
| Symbol;Acc:HGNC:14276]                                              | -            | 1491                 | 1629                      | 1831           | 1605        | 1569 |
| 2575                                                                | 17.7126871   | 17.44155785          | 21.00099981               |                |             |      |
| 21.91253744                                                         | 23.69604656  | 29.41804732          |                           |                |             |      |
| ENSG00000275956                                                     | 0            | 0                    | 25.34759057               | 0              |             |      |
| 12.00125567                                                         | 0            | 12.44961541          | -6.202194825              | 0.010855044    |             |      |
| 1                                                                   | AC104446.1   | 3                    | 52732547                  | 52733867       |             |      |
| +                                                                   | 1321         | processed_pseudogene | zinc finger protein       |                |             |      |
| 610 (ZNF610)                                                        | pseudogene   | -                    | 0                         | 0              | 23          | 0    |
| 13                                                                  | 0            | 0                    | 0                         | 0.967469009    | 0           |      |
| 0.457584761                                                         |              |                      |                           |                |             |      |
| ENSG00000134253                                                     | 362.619686   | 270.5965607          | 231.6705126               |                |             |      |
| 152.0855434                                                         | 162.4230772  | 184.6347025          | 288.2955864               |                |             |      |
| 166.3811077                                                         | 0.791858609  | 0.0108564            | 1                         | TRIM45         | 1           |      |
| 117111060                                                           | 117122587    | -                    | 4368                      | protein_coding |             |      |
| tripartite motif containing 45 [Source:HGNC                         |              |                      |                           |                |             |      |
| Symbol;Acc:HGNC:19018]                                              | -            | 377                  | 311                       | 249            | 138         | 134  |
| 200                                                                 | 4.173111004  | 3.102675505          | 2.661109548               |                |             |      |
| 1.75553099                                                          | 1.885686661  | 2.129013347          |                           |                |             |      |
| ENSG00000151240                                                     | 622.3207873  | 780.4666076          | 693.1507306               |                |             |      |
| 486.0124975                                                         | 450.9058561  | 531.7479433          | 698.6460418               |                |             |      |
| 489.5554323                                                         | 0.512541263  | 0.010912686          | 1                         | DIP2C          | 10          |      |
| 274190                                                              | 689668       | -                    | 8563                      | protein_coding | disco       |      |
| interacting protein 2 homolog C [Source:HGNC Symbol;Acc:HGNC:29150] |              |                      |                           |                |             |      |
| -                                                                   | 647          | 897                  | 745                       | 441            | 372         | 576  |
| 3.653251347                                                         | 4.564835132  | 4.061405612          | 2.861703859               |                |             |      |
| 2.670326441                                                         | 3.12771777   |                      |                           |                |             |      |
| ENSG00000124788                                                     | 534.7918976  | 448.9640686          | 405.655998                |                |             |      |
| 252.3738366                                                         | 264.2405286  | 363.730364           | 463.1373214               |                |             |      |
| 293.4482431                                                         | 0.656371828  | 0.010916025          | 1                         | ATXN1          | 6           |      |
| 16299112                                                            | 16761491     | -                    | 17812                     | protein_coding |             |      |
| ataxin 1 [Source:HGNC Symbol;Acc:HGNC:10548]                        |              |                      |                           |                |             |      |
| 516                                                                 | 436          | 229                  | 218                       | 394            | 1.509257427 | 556  |
| 1.262396009                                                         | 1.142667404  | 0.714389133          | 0.752300183               |                |             |      |
| 1.028524292                                                         |              |                      |                           |                |             |      |
| ENSG00000203786                                                     | 0            | 0                    | 0                         | 8.816553243    | 15.75746271 |      |
| 5.539041076                                                         | 0            | 10.03768568          | -5.887970839              |                |             |      |
| 0.010954849                                                         | 1            | KPRP                 | 1                         | 152759561      | 152762052   |      |
| +                                                                   | 2492         | protein_coding       | keratinocyte proline rich |                |             |      |
| protein [Source:HGNC Symbol;Acc:HGNC:31823]                         |              |                      |                           |                |             |      |
| 0                                                                   | 8            | 13                   | 6                         | 0              | 0           | 0    |
| 0.178383217                                                         | 0.320658439  | 0.111952612          |                           |                |             |      |
| ENSG00000169228                                                     | 66.36805924  | 97.44956528          | 152.5862011               |                |             |      |
| 26.44965973                                                         | 26.66647536  | 60.00627833          | 105.4679419               |                |             |      |
| 37.70747114                                                         | 1.477060735  | 0.01096849           | 1                         | RAB24          | 5           |      |
| 177301198                                                           | 177303744    | -                    | 2065                      | protein_coding |             |      |
| "RAB24, member RAS oncogene family [Source:HGNC                     |              |                      |                           |                |             |      |

|                                                        |                                                              |             |              |                  |             |             |
|--------------------------------------------------------|--------------------------------------------------------------|-------------|--------------|------------------|-------------|-------------|
| Symbol;Acc:HGNC:9765]"                                 | -                                                            | 69          | 112          | 164              | 24          | 22          |
| 65                                                     | 1.615586633                                                  | 2.363505212 | 3.707403263  |                  |             |             |
| 0.645807716                                            | 0.654862294                                                  | 1.463606464 |              |                  |             |             |
| ENSG00000280300                                        | 0                                                            | 0           | 7.714484088  | 10.90901265      |             |             |
| 11.07808215                                            | 0                                                            | 9.900526296 | -5.870648489 |                  |             |             |
| 0.011003258                                            | 1                                                            | AC117503.4  | 12           | 123754246        |             |             |
| 123754794                                              | -                                                            | 549         | TEC          | novel transcript |             | -           |
| 0                                                      | 0                                                            | 0           | 7            | 9                | 12          | 0           |
| 0                                                      | 0.708496549                                                  | 1.007668135 | 1.016342109  |                  |             |             |
| ENSG00000143933                                        | 5408.5159                                                    | 6100.168769 | 5380.524396  |                  |             |             |
| 7023.486727                                            | 6747.830378                                                  | 6690.238447 | 5629.736355  |                  |             |             |
| 6820.518518                                            | -0.276732905                                                 | 0.011107693 | 0.13873282   | CALM2            |             |             |
| 2                                                      | 47160082                                                     | 47176601    | -            | 6466             |             |             |
| protein_coding                                         | calmodulin 2 [Source:HGNC Symbol;Acc:HGNC:1445] -            |             |              |                  |             |             |
| 5623                                                   | 7011                                                         | 5783        | 6373         | 5567             | 7247        | 42.04686299 |
| 47.25011443                                            | 41.75067755                                                  | 54.76716518 | 52.92158968  |                  |             |             |
| 52.11390047                                            |                                                              |             |              |                  |             |             |
| ENSG00000075240                                        | 403.979491                                                   | 401.9794568 | 366.5790441  |                  |             |             |
| 254.5779749                                            | 267.8768661                                                  | 240.0251133 | 390.8459973  |                  |             |             |
| 254.1599848                                            | 0.621565276                                                  | 0.011139169 | 1            | GRAMD4           | 22          |             |
| 46576012                                               | 46679790                                                     | +           | 4885         | protein_coding   |             |             |
|                                                        | GRAM domain containing 4 [Source:HGNC Symbol;Acc:HGNC:29113] |             |              |                  |             |             |
| -                                                      | 420                                                          | 462         | 394          | 231              | 221         | 260         |
| 4.157056611                                            | 4.121316855                                                  | 3.765110179 | 2.627601224  |                  |             |             |
| 2.780834007                                            | 2.474798237                                                  |             |              |                  |             |             |
| ENSG00000121653                                        | 657.9094568                                                  | 526.4016696 | 834.5720877  |                  |             |             |
| 656.8332166                                            | 1368.475031                                                  | 1145.658329 | 672.9610713  |                  |             |             |
| 1056.988859                                            | -0.651386008                                                 | 0.011139862 | 1            | MAPK8IP1         |             |             |
| 11                                                     | 45885651                                                     | 45906465    | +            | 3498             |             |             |
| protein_coding                                         | mitogen-activated protein kinase 8 interacting protein       |             |              |                  |             |             |
| 1 [Source:HGNC Symbol;Acc:HGNC:6882]                   | -                                                            | 684         | 605          | 897              |             |             |
| 596                                                    | 1129                                                         | 1241        | 9.454477074  | 7.536924542      |             |             |
| 11.97067593                                            | 9.46756942                                                   | 19.83907855 | 16.4961651   |                  |             |             |
| ENSG00000213918                                        | 782.9507278                                                  | 624.7213202 | 543.3557405  |                  |             |             |
| 398.9490343                                            | 489.6934566                                                  | 431.1220304 | 650.3425962  |                  |             |             |
| 439.9215071                                            | 0.564250547                                                  | 0.011190202 | 1            | DNASE1           | 16          |             |
| 3611728                                                | 3680143                                                      | +           | 13801        | protein_coding   |             |             |
| deoxyribonuclease 1 [Source:HGNC Symbol;Acc:HGNC:2956] | -                                                            | 814         |              |                  |             |             |
| 718                                                    | 584                                                          | 362         | 404          | 467              | 2.851773739 |             |
| 2.267109444                                            | 1.975369423                                                  | 1.457505017 | 1.799360446  |                  |             |             |
| 1.573393468                                            |                                                              |             |              |                  |             |             |
| ENSG00000237649                                        | 541.5248891                                                  | 683.8871277 | 476.3666766  |                  |             |             |
| 1165.989166                                            | 832.7212987                                                  | 622.2189476 | 567.2595645  |                  |             |             |
| 873.6431376                                            | -0.622173977                                                 | 0.011282534 | 1            | KIFC1            | 6           |             |
| 33391536                                               | 33409924                                                     | +           | 3345         | protein_coding   |             |             |
|                                                        | kinesin family member C1 [Source:HGNC Symbol;Acc:HGNC:6389]  |             |              |                  |             |             |
| -                                                      | 563                                                          | 786         | 512          | 1058             | 687         | 674         |
| 8.137921369                                            | 10.23964786                                                  | 7.145290245 | 17.57525315  |                  |             |             |
| 12.62431944                                            | 9.369033516                                                  |             |              |                  |             |             |
| ENSG00000278900                                        | 13.46598303                                                  | 9.570939447 | 8.373632987  | 0                |             |             |

|                                                                   |              |             |             |                    |                |             |
|-------------------------------------------------------------------|--------------|-------------|-------------|--------------------|----------------|-------------|
| 0                                                                 | 0            | 10.47018516 | 0           | 5.729831957        |                |             |
| 0.011304236                                                       | 1            | AC139792.2  | 5           | 34105750           |                |             |
| 34106336                                                          | -            | 587         | TEC         | TEC                | -              | 14 11       |
| 9                                                                 | 0            | 0           | 0           | 1.153164199        | 0.816607157    |             |
| 0.715732015                                                       | 0            | 0           | 0           |                    |                |             |
| ENSG00000196704                                                   | 1664.972616  | 1900.266523 |             | 1488.645864        |                |             |
| 2046.542422                                                       | 2081.19719   | 2452.872023 |             | 1684.628335        |                |             |
| 2193.537212                                                       | -0.381048515 | 0.011348259 |             | 1                  | AMZ2           | 17          |
| 68247574                                                          | 68257164     | +           |             | 4214               | protein_coding |             |
| archaelysin family metalloproteinase 2 [Source:HGNC               |              |             |             |                    |                |             |
| Symbol;Acc:HGNC:28041]                                            | -            | 1731        | 2184        | 1600               | 1857           | 1717        |
| 2657                                                              | 19.86112081  | 22.58482348 |             | 17.72439774        |                |             |
| 24.48665239                                                       | 25.04512042  | 29.31757476 |             |                    |                |             |
| ENSG00000226797                                                   | 5.771135586  | 5.220512425 |             | 21.3992843         |                | 0           |
| 0                                                                 | 0            | 10.79697744 | 0           | 5.77414574         |                |             |
| 0.011393896                                                       | 1            | AC005828.1  | 17          | 63381231           |                |             |
| 63414312                                                          | -            | 524         | antisense   | "novel transcript, |                |             |
| antisense to TANC2"                                               | -            | 6           | 6           | 23                 | 0              | 0           |
| 0                                                                 | 0.553631994  | 0.498974741 |             | 2.049002956        |                | 0           |
| 0                                                                 | 0            |             |             |                    |                |             |
| ENSG00000250374                                                   | 51.94022027  | 0           | 0           | 0                  | 0              | 0           |
| 17.31340676                                                       | 0            | 6.454734987 |             | 0.011416179        |                | 1           |
| TRIM75P                                                           | 4            | 165053864   | 165060554   | +                  |                | 1840        |
| protein_coding "tripartite motif containing 75, pseudogene        |              |             |             |                    |                |             |
| [Source:HGNC Symbol;Acc:HGNC:32686]"                              |              |             |             |                    |                |             |
| 0                                                                 | 0            | 0           | 1.418982872 | 0                  | 0              | 0           |
| 0                                                                 | 0            |             |             |                    |                |             |
| ENSG00000072832                                                   | 588.6558297  | 406.3298838 |             | 486.6011169        |                |             |
| 309.6814327                                                       | 283.6343288  | 365.576711  |             | 493.8622768        |                |             |
| 319.6308242                                                       | 0.626049875  | 0.011480359 |             | 1                  | CRMP1          | 4           |
| 5748084                                                           | 5893058      | -           | 5823        | protein_coding     | collapsin      |             |
| response mediator protein 1 [Source:HGNC Symbol;Acc:HGNC:2365]    |              |             |             |                    |                |             |
| 612                                                               | 467          | 523         | 281         | 234                | 396            | 5.081662859 |
| 3.494851189                                                       | 4.19276899   | 2.681461547 |             | 2.47011076         |                |             |
| 3.162127768                                                       |              |             |             |                    |                |             |
| ENSG00000116285                                                   | 7971.861956  | 10676.818   |             | 7982.863447        |                |             |
| 7118.264675                                                       | 6864.19318   | 7193.368011 |             | 8877.181133        |                |             |
| 7058.608622                                                       | 0.330750045  | 0.011520727 |             | 0.142919285        |                | ERRFI1      |
| 1                                                                 | 8004404      | 8026308     | -           | 4186               | protein_coding | ERBB        |
| receptor feedback inhibitor 1 [Source:HGNC Symbol;Acc:HGNC:18185] |              |             |             |                    |                |             |
| -                                                                 | 8288         | 12271       | 8580        | 6459               | 5663           | 7792        |
| 95.73081029                                                       | 127.7436526  | 95.68284934 |             | 85.73893886        |                |             |
| 83.15621201                                                       | 86.55272348  |             |             |                    |                |             |
| ENSG00000222009                                                   | 388.5897961  | 323.6717704 |             | 423.3336677        |                |             |
| 293.1503953                                                       | 204.8470153  | 197.5591317 |             | 378.5317447        |                |             |
| 231.8521808                                                       | 0.707494217  | 0.011605235 |             | 1                  | BTBD19         | 1           |
| 44808482                                                          | 44815585     | +           |             | 3520               | protein_coding |             |
| BTB domain containing 19 [Source:HGNC Symbol;Acc:HGNC:27145]      |              |             |             |                    |                |             |
| -                                                                 | 404          | 372         | 455         | 266                | 169            | 214         |
| 5.549321905                                                       | 4.60531005   | 6.034131481 |             | 4.199049718        |                |             |

|                                                            |              |             |                  |                             |             |             |  |
|------------------------------------------------------------|--------------|-------------|------------------|-----------------------------|-------------|-------------|--|
| 2.951150796                                                | 2.826845858  |             |                  |                             |             |             |  |
| ENSG00000182054                                            | 958.0085072  | 1026.700777 | 1074.616233      |                             |             |             |  |
| 1423.873349                                                | 1618.170209  | 1119.809471 | 1019.775173      |                             |             |             |  |
| 1387.284343                                                | -0.443136154 | 0.011622735 | 1                | IDH2                        | 15          |             |  |
| 90083045                                                   | 90102504     | -           | 2814             | protein_coding              |             |             |  |
| "isocitrate dehydrogenase (NADP(+)) 2, mitochondrial       |              |             |                  |                             |             |             |  |
| [Source:HGNC Symbol;Acc:HGNC:5383]"                        |              |             |                  |                             |             |             |  |
| 1292                                                       | 1335         | 1213        | 17.11340632      | 18.27328013                 | 1155        |             |  |
| 19.16037157                                                | 25.51234999  | 29.16114234 | 20.04323073      |                             |             |             |  |
| ENSG00000257022                                            | 34.62681351  | 6.09059783  | 0                | 0                           | 0           |             |  |
| 0                                                          | 13.57247045  | 0           | 6.103563794      | 0.011636082                 |             |             |  |
| 1                                                          | AC008250.1   | 12          | 21827210         | 21887957                    |             |             |  |
| +                                                          | 522          | antisense   | novel transcript | -                           |             |             |  |
| 36                                                         | 7            | 0           | 0                | 0                           | 3.334519137 |             |  |
| 0.584367608                                                | 0            | 0           | 0                | 0                           |             |             |  |
| ENSG00000175063                                            | 516.5166349  | 589.0478187 | 641.978529       |                             |             |             |  |
| 1276.196082                                                | 1020.598739  | 515.1308201 | 582.5143275      |                             |             |             |  |
| 937.3085469                                                | -0.685288343 | 0.011683126 | 1                | UBE2C                       | 20          |             |  |
| 45812576                                                   | 45816957     | +           | 1286             | protein_coding              |             |             |  |
| ubiquitin conjugating enzyme E2 C [Source:HGNC             |              |             |                  |                             |             |             |  |
| Symbol;Acc:HGNC:15937]                                     |              |             |                  |                             |             |             |  |
| 558                                                        | 20.189917    | 22.94068057 | 690              | 1158                        | 842         |             |  |
| 50.03566019                                                | 40.24560711  | 20.17549731 | 25.04691016      |                             |             |             |  |
| ENSG00000273291                                            | 4.809279655  | 16.53162268 | 10.23444032      | 0                           |             |             |  |
| 0                                                          | 0            | 10.52511422 | 0                | 5.738461881                 |             |             |  |
| 0.011828196                                                | 1            | AC092042.3  | 3                | 42809446                    |             |             |  |
| 43055871                                                   | +            | 1654        | protein_coding   | novel protein               | -           |             |  |
| 5                                                          | 19           | 11          | 0                | 0                           | 0.146162417 |             |  |
| 0.500583688                                                | 0.310458258  | 0           | 0                | 0                           |             |             |  |
| ENSG00000071282                                            | 209.6845929  | 166.1863122 | 169.3334671      |                             |             |             |  |
| 262.292459                                                 | 316.3613668  | 323.1107295 | 181.7347907      |                             |             |             |  |
| 300.5881851                                                | -0.72659899  | 0.011831605 | 1                | LMCD1                       | 3           |             |  |
| 8501707                                                    | 8574673      | +           | 9130             | protein_coding              | LIM and     |             |  |
| cysteine rich domains 1 [Source:HGNC Symbol;Acc:HGNC:6633] |              |             |                  |                             |             |             |  |
| 218                                                        | 191          | 182         | 238              | 261                         | 350         | 1.154481379 |  |
| 0.911635413                                                | 0.930564855  | 1.448499078 | 1.757183392      |                             |             |             |  |
| 1.782494855                                                |              |             |                  |                             |             |             |  |
| ENSG00000094804                                            | 1769.814913  | 1640.110987 | 1533.30524       |                             |             |             |  |
| 2380.469376                                                | 1779.381174  | 2311.626476 | 1647.743713      |                             |             |             |  |
| 2157.159009                                                | -0.389099775 | 0.011874301 | 1                | CDC6                        | 17          |             |  |
| 40287633                                                   | 40304657     | +           | 5557             | protein_coding              |             |             |  |
| cell division cycle 6 [Source:HGNC Symbol;Acc:HGNC:1744]   |              |             |                  |                             |             |             |  |
| -                                                          | 1840         | 1885        | 1648             | 2160                        | 1468        | 2504        |  |
| 16.00953223                                                | 14.78187602  | 13.84404003 | 21.59858988      |                             |             |             |  |
| 16.23801802                                                | 20.95197397  |             |                  |                             |             |             |  |
| ENSG00000285373                                            | 24.04639827  | 6.09059783  | 2.791210996      | 0                           |             |             |  |
| 0                                                          | 0            | 10.97606903 | 0                | 5.797160426                 |             |             |  |
| 0.011883669                                                | 1            | LINC02478   | 2                | 160257718                   |             |             |  |
| 160271880                                                  | -            | 614         | lincRNA          | long intergenic non-protein |             |             |  |
| coding RNA 2478 [Source:HGNC Symbol;Acc:HGNC:53446]        |              |             |                  |                             |             |             |  |
|                                                            |              |             |                  |                             | -           | 25          |  |

|                                                           |              |             |             |       |                  |                |        |
|-----------------------------------------------------------|--------------|-------------|-------------|-------|------------------|----------------|--------|
| 7                                                         | 3            | 0           | 0           | 0     | 1.968669686      |                |        |
| 0.496807641                                               | 0.228086153  |             | 0           | 0     | 0                |                |        |
| ENSG0000006007                                            | 868.5559056  |             | 1043.2324   |       | 999.2535364      |                |        |
| 1233.215385                                               | 1185.446041  |             | 1482.616661 |       | 970.3472806      |                |        |
| 1300.426029                                               | -0.422855305 |             | 0.011942762 |       | 1                | GDE1           | 16     |
| 19501689                                                  | 19522145     |             | -           |       | 4416             | protein_coding |        |
| glycerophosphodiester phosphodiesterase 1 [Source:HGNC    |              |             |             |       |                  |                |        |
| Symbol;Acc:HGNC:29644]                                    | -            |             | 903         | 1199  | 1074             | 1119           | 978    |
| 1606                                                      | 9.886894548  |             | 11.83174269 |       | 11.35327748      |                |        |
| 14.08033752                                               | 13.61310362  |             | 16.91015134 |       |                  |                |        |
| ENSG00000104728                                           | 51.94022027  |             | 23.49230591 |       | 23.26009163      |                |        |
| 6.612414933                                               | 7.272675098  |             | 3.692694051 |       | 32.89753927      |                |        |
| 5.85926136                                                | 2.498183759  |             | 0.012003728 |       | 1                | ARHGEF10       |        |
| 8                                                         | 1823976      | 1958641     | +           | 10792 |                  | protein_coding | Rho    |
| guanine nucleotide exchange factor 10 [Source:HGNC        |              |             |             |       |                  |                |        |
| Symbol;Acc:HGNC:14103]                                    | -            |             | 54          | 27    | 25               | 6              | 6      |
| 4                                                         | 0.241931846  |             | 0.109023577 |       | 0.108139438      |                |        |
| 0.030893091                                               | 0.034174068  |             | 0.017234118 |       |                  |                |        |
| ENSG00000100412                                           | 1076.316787  |             | 1043.2324   |       | 1079.268252      |                |        |
| 1266.27746                                                | 1506.655858  |             | 1393.992004 |       | 1066.272479      |                |        |
| 1388.975107                                               | -0.381308279 |             | 0.012073206 |       | 1                | AC02           | 22     |
| 41469125                                                  | 41528989     |             | +           |       | 4041             | protein_coding |        |
| aconitase 2 [Source:HGNC Symbol;Acc:HGNC:118]             |              |             |             |       |                  |                |        |
| 1199                                                      | 1160         | 1149        |             | 1243  | 1510             | 13.38882461    | 1119   |
| 12.92971435                                               | 13.40032016  |             | 15.79949559 |       | 18.90730537      |                |        |
| 17.37477203                                               |              |             |             |       |                  |                |        |
| ENSG00000179528                                           | 42.32166096  |             | 44.37435562 |       | 60.47623824      |                |        |
| 88.16553243                                               | 133.3323768  |             | 118.1662096 |       | 49.05741827      |                |        |
| 113.221373                                                | -1.206386992 |             | 0.012076424 |       | 1                | LBX2           | 2      |
| 74497517                                                  | 74503316     |             | -           |       | 2389             | protein_coding |        |
| ladybird homeobox 2 [Source:HGNC Symbol;Acc:HGNC:15525]   |              |             |             |       |                  |                |        |
| Homeobox                                                  | 44           | 51          | 65          | 80    | 110              | 128            |        |
| 0.890507832                                               | 0.930277729  |             | 1.270115578 |       | 1.860740802      |                |        |
| 2.830244112                                               | 2.491293174  |             |             |       |                  |                |        |
| ENSG00000234091                                           | 28.85567793  |             | 1.740170808 |       | 3.721614661      |                | 0      |
| 0                                                         | 0            | 11.43915447 | 0           |       | 5.856354566      |                |        |
| 0.012093304                                               | 1            | AL157392.2  | 10          |       | 13729383         |                |        |
| 13756200                                                  | +            | 474         | antisense   |       | novel transcript |                |        |
| -                                                         | 30           | 2           | 4           | 0     | 0                | 0              |        |
| 3.060159968                                               | 0.183869736  |             | 0.393937827 |       | 0                | 0              | 0      |
| ENSG00000088986                                           | 2361.35631   |             | 2705.095522 |       | 2498.133841      |                |        |
| 2694.559085                                               | 3687.246275  |             | 3347.427157 |       | 2521.528558      |                |        |
| 3243.077506                                               | -0.362893145 |             | 0.012093739 |       | 0.149020833      |                | DYNLL1 |
| 12                                                        | 120469850    |             | 120498493   |       | +                | 2957           |        |
| protein_coding dynein light chain LC8-type 1 [Source:HGNC |              |             |             |       |                  |                |        |
| Symbol;Acc:HGNC:15476]                                    | -            |             | 2455        | 3109  | 2685             | 2445           | 3042   |
| 3626                                                      | 40.14222015  |             | 45.81714202 |       | 42.38761698      |                |        |
| 45.94514036                                               | 63.23466839  |             | 57.017411   |       |                  |                |        |
| ENSG00000158079                                           | 249.1206861  |             | 281.907671  |       | 210.2712283      |                |        |
| 167.5145116                                               | 122.4233641  |             | 132.0138123 |       | 247.0998618      |                |        |

|                                                                      |              |             |             |                |             |
|----------------------------------------------------------------------|--------------|-------------|-------------|----------------|-------------|
| 140.6505627                                                          | 0.813066953  | 0.012143928 | 1           | PTPDC1         | 9           |
| 94030794                                                             | 94109856     | +           | 6404        | protein_coding |             |
| protein tyrosine phosphatase domain containing 1 [Source:HGNC        |              |             |             |                |             |
| Symbol;Acc:HGNC:30184]                                               | -            | 259         | 324         | 226            | 152 101     |
| 143                                                                  | 1.955463245  | 2.204714126 | 1.647415515 |                |             |
| 1.318877042                                                          | 0.969432133  | 1.038282974 |             |                |             |
| ENSG00000170962                                                      | 26.93196607  | 27.84273294 | 21.3992843  |                |             |
| 108.0027772                                                          | 59.3935133   | 55.39041076 | 25.39132777 |                |             |
| 74.26223376                                                          | -1.547443761 | 0.01221908  | 1           | PDGFD          | 11          |
| 103907186                                                            | 104164379    | -           | 4266        | protein_coding |             |
| platelet derived growth factor D [Source:HGNC                        |              |             |             |                |             |
| Symbol;Acc:HGNC:30620]                                               | -            | 28          | 32          | 23             | 98 49       |
| 60                                                                   | 0.317349923  | 0.32687953  | 0.251682501 |                |             |
| 1.276489563                                                          | 0.70602908   | 0.653975408 |             |                |             |
| ENSG00000173209                                                      | 246.2351183  | 340.2033931 | 329.3628975 |                |             |
| 168.6165808                                                          | 190.3016651  | 193.8664377 | 305.2671363 |                |             |
| 184.2615612                                                          | 0.728414468  | 0.012229479 | 1           | AHSA2P         | 2           |
| 61177418                                                             | 61191203     | +           | 9083        |                |             |
| transcribed_unitary_pseudogene "activator of HSP90 ATPase homolog 2, |              |             |             |                |             |
| pseudogene [Source:HGNC Symbol;Acc:HGNC:20437]" - 256 391            |              |             |             |                |             |
| 354                                                                  | 153          | 157         | 210         | 1.362736435    | 1.875884267 |
| 1.81936562                                                           | 0.935996361  | 1.062472501 | 1.075031027 |                |             |
| ENSG00000114302                                                      | 2744.174971  | 2672.902362 | 2918.676298 |                |             |
| 3510.09026                                                           | 3133.310855  | 3691.770877 | 2778.584544 |                |             |
| 3445.057331                                                          | -0.310494679 | 0.012289493 | 0.14903889  |                |             |
| PRKAR2A                                                              | 3            | 48744597    | 48847846    | -              | 6644        |
| protein_coding protein kinase cAMP-dependent type II regulatory      |              |             |             |                |             |
| subunit alpha [Source:HGNC Symbol;Acc:HGNC:9391] - 2853              |              |             |             |                |             |
| 3072                                                                 | 3137         | 3185        | 2585        | 3999           | 20.76219972 |
| 20.14884636                                                          | 22.04098154  | 26.63740148 | 23.91543495 |                |             |
| 27.98677127                                                          |              |             |             |                |             |
| ENSG00000130522                                                      | 4753.492011  | 5931.372201 | 5704.304871 |                |             |
| 5115.805019                                                          | 8913.875445  | 8087.923145 | 5463.056361 |                |             |
| 7372.534536                                                          | -0.43239768  | 0.012334218 | 0.14903889  | JUND           |             |
| 19                                                                   | 18279760     | 18281622    | -           | 1863           |             |
| protein_coding "JunD proto-oncogene, AP-1 transcription factor       |              |             |             |                |             |
| subunit [Source:HGNC Symbol;Acc:HGNC:6206]" TF_bZIP 4942 6817        |              |             |             |                |             |
| 6131                                                                 | 4642         | 7354        | 8761        | 128.2599607    | 159.4553286 |
| 153.6259201                                                          | 138.4536231  | 242.6376163 | 218.6612586 |                |             |
| ENSG00000263887                                                      | 132.7361185  | 57.42563668 | 13.95605498 |                |             |
| 15.42896818                                                          | 15.75746271  | 18.46347025 | 68.03927004 |                |             |
| 16.54996705                                                          | 2.037412901  | 0.012338068 | 1           | AC053481.2     |             |
| 17                                                                   | 62282702     | 62297026    | -           | 1500           |             |
| transcribed_unprocessed_pseudogene ubiquitin specific peptidase      |              |             |             |                |             |
| 32 (USP32) pseudogene - 138 66 15 14 13                              |              |             |             |                |             |
| 20                                                                   | 4.448248529  | 1.917393604 | 0.466816326 |                |             |
| 0.518619474                                                          | 0.532720554  | 0.619968687 |             |                |             |
| ENSG00000134909                                                      | 1290.810659  | 1058.893937 | 1154.630949 |                |             |
| 943.371197                                                           | 855.7514365  | 828.0866409 | 1168.111848 |                |             |
| 875.7364248                                                          | 0.415622205  | 0.012389108 | 1           | ARHGAP32       |             |

|                                                     |                                                 |                              |                      |                |             |                |
|-----------------------------------------------------|-------------------------------------------------|------------------------------|----------------------|----------------|-------------|----------------|
| 11                                                  | 128965060                                       | 129279324                    | -                    | 12841          |             |                |
| protein_coding                                      | Rho GTPase activating protein 32 [Source:HGNC   |                              |                      |                |             |                |
| Symbol;Acc:HGNC:17399]                              | -                                               | 1342                         | 1217                 | 1241           | 856         | 706            |
| 897                                                 | 5.053065018                                     | 4.130002647                  |                      | 4.511479324    |             |                |
| 3.704136329                                         | 3.379505949                                     | 3.248064278                  |                      |                |             |                |
| ENSG00000101680                                     | 7.694847448                                     | 2.610256213                  |                      | 3.721614661    |             |                |
| 4.408276622                                         | 15.75746271                                     | 87.70148371                  |                      | 4.675572774    |             |                |
| 35.95574101                                         | -2.952087697                                    | 0.012414963                  |                      | 1              | LAMA1       | 18             |
| 6941744                                             | 7117814                                         | -                            | 15872                | protein_coding | laminin     |                |
| subunit alpha 1 [Source:HGNC                        | Symbol;Acc:HGNC:6481]                           |                              |                      | -              |             | 8              |
| 3                                                   | 4                                               | 4                            | 13                   | 95             | 0.024370226 |                |
| 0.008236604                                         | 0.011764524                                     | 0.014003622                  |                      | 0.050345314    |             |                |
| 0.278306256                                         |                                                 |                              |                      |                |             |                |
| ENSG00000285399                                     | 57.71135586                                     | 8.700854042                  |                      | 56.75462358    |             |                |
| 13.22482987                                         | 0                                               | 2.769520538                  |                      | 41.05561116    | 5.331450134 |                |
|                                                     | 2.942610188                                     | 0.012451697                  |                      | 1              | AC104162.2  | 3              |
|                                                     | 63863155                                        | 63905838                     |                      | +              | 5642        |                |
| bidirectional_promoter_lncRNA                       | novel transcript                                |                              |                      | -              |             | 60             |
| 10                                                  | 61                                              | 12                           | 0                    | 3              | 0.514184979 |                |
| 0.077237021                                         | 0.504711022                                     | 0.118184414                  |                      | 0              | 0.024724026 |                |
| ENSG00000162601                                     | 1505.304532                                     | 1250.312726                  |                      | 1212.315976    |             |                |
| 1069.007081                                         | 1032.719864                                     | 844.7037641                  |                      | 1322.644411    |             |                |
| 982.1435696                                         | 0.429988906                                     | 0.012454083                  |                      | 1              | MYSM1       | 1              |
|                                                     | 58654739                                        | 58700092                     |                      | -              | 8938        | protein_coding |
|                                                     | "Myb like, SWIRM and MPN domains 1 [Source:HGNC |                              |                      |                |             |                |
| Symbol;Acc:HGNC:29401]"                             | MYB                                             | 1565                         | 1437                 | 1303           | 970         | 852            |
| 915                                                 | 8.465940426                                     | 7.006078766                  |                      | 6.805344285    |             |                |
| 6.030362613                                         | 5.859311736                                     | 4.76005271                   |                      |                |             |                |
| ENSG00000142945                                     | 605.9692365                                     | 580.3469646                  |                      | 783.3998861    |             |                |
| 1313.666433                                         | 848.4787614                                     | 772.6962302                  |                      | 656.5720291    |             |                |
| 978.2804749                                         | -0.575083002                                    | 0.012460807                  |                      | 1              | KIF2C       | 1              |
|                                                     | 44739818                                        | 44767767                     |                      | +              | 3646        | protein_coding |
|                                                     | kinesin family member 2C [Source:HGNC           | Symbol;Acc:HGNC:6393]        |                      |                |             |                |
| -                                                   | 630                                             | 667                          | 842                  | 1192           | 700         | 837            |
| 8.354589227                                         | 7.972008762                                     | 10.78056352                  |                      | 18.16651554    |             |                |
| 11.80126971                                         | 10.67431001                                     |                              |                      |                |             |                |
| ENSG00000067715                                     | 25.0082542                                      | 0                            | 13.95605498          | 0              | 0           |                |
| 0                                                   | 12.98810306                                     | 0                            | 6.039946592          | 0.012506358    |             |                |
| 1                                                   | SYT1                                            | 12                           | 78863993             | 79452008       |             | +              |
| 6494                                                | protein_coding                                  | synaptotagmin 1 [Source:HGNC |                      |                |             |                |
| Symbol;Acc:HGNC:11509]                              | -                                               | 26                           | 0                    | 15             | 0           | 0              |
| 0                                                   | 0.1935808                                       | 0                            | 0.107826376          | 0              | 0           |                |
| 0                                                   |                                                 |                              |                      |                |             |                |
| ENSG00000227953                                     | 26.93196607                                     | 2.610256213                  |                      | 3.721614661    |             | 0              |
| 0                                                   | 0                                               | 11.08794565                  | 0                    | 5.811431752    |             |                |
| 0.012567444                                         | 1                                               | LINC01341                    | 1                    | 246776013      |             |                |
| 246792385                                           | +                                               | 3984                         | processed_transcript | long           |             |                |
| intergenic non-protein coding RNA 1341 [Source:HGNC |                                                 |                              |                      |                |             |                |
| Symbol;Acc:HGNC:49457]                              | -                                               | 28                           | 3                    | 4              | 0           | 0              |
| 0                                                   | 0.339812944                                     | 0.032814102                  |                      | 0.046869109    |             | 0              |



|                         |                                                      |             |                |                    |                |             |             |
|-------------------------|------------------------------------------------------|-------------|----------------|--------------------|----------------|-------------|-------------|
| 0                       | 0                                                    |             |                |                    |                |             |             |
| ENSG00000219992         | 0                                                    | 0           | 0              | 0                  | 4.848450065    |             |             |
| 32.31107295             | 0                                                    | 12.38650767 |                | -6.197594429       | 0.012625591    |             |             |
| 1                       | AL391422.1                                           | 6           |                | 3754099            | 3754840        | +           | 436         |
|                         | processed_pseudogene                                 |             |                |                    |                |             |             |
|                         |                                                      |             |                |                    |                |             |             |
| pseudogene              | -                                                    | 0           | 0              | 0                  | 0              | 4           | 35          |
| 0                       | 0                                                    | 0           | 0              | 0.563924369        | 3.732609639    |             |             |
| ENSG00000116539         | 2928.85131                                           | 2306.596407 |                | 2838.661582        |                |             |             |
| 2381.571445             | 1984.228189                                          | 1840.807984 |                | 2691.369766        |                |             |             |
| 2068.869206             | 0.379587438                                          | 0.012632179 |                | 0.14903889         |                |             | ASH1L       |
| 1                       | 155335268                                            | 155562807   |                | -                  | 13296          |             |             |
|                         | protein_coding                                       |             |                |                    |                |             |             |
|                         | ASH1 like histone lysine methyltransferase           |             |                |                    |                |             |             |
|                         | [Source:HGNC Symbol;Acc:HGNC:19088]                  |             |                | Others             | 3045           | 2651        | 3051        |
|                         | 2161                                                 | 1637        | 1994           | 11.07305627        | 8.688550287    |             |             |
| 10.71191794             | 9.031207155                                          | 7.567893873 |                | 6.973248879        |                |             |             |
| ENSG00000267044         | 3.847423724                                          | 18.27179349 |                | 9.304036652        |                |             | 0           |
| 0                       | 0                                                    | 10.47441795 | 0              | 5.731695034        |                |             |             |
| 0.012636047             | 1                                                    | AC005757.1  | 19             | 45135993           |                |             |             |
| 45136977                | -                                                    | 472         | antisense      | "novel transcript, |                |             |             |
| antisense to PPP1R37"   | -                                                    | 4           | 21             | 10                 | 0              | 0           |             |
| 0                       | 0.409750233                                          | 1.93881287  |                | 0.989017639        |                |             | 0           |
| 0                       | 0                                                    |             |                |                    |                |             |             |
| ENSG00000123136         | 3272.233877                                          | 2756.430561 |                | 2725.152335        |                |             |             |
| 3280.859876             | 3653.307124                                          | 4186.59188  |                | 2917.938924        |                |             |             |
| 3706.919627             | -0.34558892                                          | 0.012645182 |                | 0.14903889         |                |             | DDX39A      |
| 19                      | 14408819                                             | 14419383    |                | -                  | 3840           |             |             |
|                         | protein_coding                                       |             |                |                    |                |             |             |
|                         | DExD-box helicase 39A [Source:HGNC                   |             |                |                    |                |             |             |
|                         | Symbol;Acc:HGNC:17821]                               | -           | 3402           | 3168               | 2929           | 2977        | 3014        |
|                         | 4535                                                 | 42.83554545 | 35.95113007    | 35.6069015         |                |             |             |
| 43.07840887             | 48.24578574                                          | 54.91324207 |                |                    |                |             |             |
| ENSG00000127824         | 1723.645828                                          | 1580.94518  |                | 1257.905755        |                |             |             |
| 1801.883069             | 2078.772965                                          | 2131.607641 |                | 1520.832254        |                |             |             |
| 2004.087892             | -0.398211739                                         | 0.012658296 |                | 1                  | TUBA4A         | 2           |             |
|                         | 219249711                                            | 219278170   |                | 4079               | protein_coding |             |             |
|                         | tubulin alpha 4a [Source:HGNC Symbol;Acc:HGNC:12407] |             |                |                    |                |             |             |
|                         | 1792                                                 | 1817        | 1352           | 1635               | 1715           | 2309        | 21.24151637 |
|                         | 19.41153234                                          | 15.47280393 |                | 22.27286554        |                | 25.84388377 |             |
|                         | 26.32093094                                          |             |                |                    |                |             |             |
| ENSG00000264853         | 18.27526269                                          | 12.18119566 |                | 1.86080733         |                |             | 0           |
| 0                       | 0                                                    | 10.77242189 | 0              | 5.770909103        |                |             |             |
| 0.012666203             | 1                                                    | AC011933.2  | 17             | 75370947           |                |             |             |
| 75373736                | -                                                    | 2790        | sense_intronic | "novel transcript, |                |             |             |
| sense intronic to GRB2" | -                                                    | 19          | 14             | 2                  | 0              | 0           |             |
| 0                       | 0.329268825                                          | 0.218666589 |                | 0.033463536        |                |             | 0           |
| 0                       | 0                                                    |             |                |                    |                |             |             |
| ENSG00000168496         | 2643.180098                                          | 2916.526275 |                | 3347.592387        |                |             |             |
| 3718.38133              | 3359.975895                                          | 4283.525099 |                | 2969.099587        |                |             |             |
| 3787.294108             | -0.351433475                                         | 0.012666476 |                | 0.14903889         |                |             | FEN1        |
| 11                      | 61792637                                             | 61797244    |                | +                  | 2478           |             |             |
|                         | protein_coding                                       |             |                |                    |                |             |             |
|                         | flap structure-specific endonuclease 1 [Source:HGNC  |             |                |                    |                |             |             |

|                                                            |                                                |             |                                  |             |                |                |
|------------------------------------------------------------|------------------------------------------------|-------------|----------------------------------|-------------|----------------|----------------|
| Symbol;Acc:HGNC:3650]                                      | -                                              | 2748        | 3352                             | 3598        | 3374           | 2772           |
| 4640                                                       | 53.61874477                                    | 58.94694548 |                                  | 67.78067552 |                |                |
| 75.6581678                                                 | 68.76054086                                    | 87.0658204  |                                  |             |                |                |
| ENSG00000177600                                            | 9581.046928                                    | 10849.09491 |                                  | 13170.79428 |                |                |
| 11489.07095                                                | 15705.34187                                    | 16311.5528  |                                  | 11200.31204 |                |                |
| 14501.98854                                                | -0.372732077                                   | 0.012675616 |                                  | 0.14903889  |                | RPLP2          |
| 11                                                         | 809647                                         | 812880      | +                                | 1955        |                | protein_coding |
| ribosomal protein lateral stalk subunit P2 [Source:HGNC    |                                                |             |                                  |             |                |                |
| Symbol;Acc:HGNC:10377]                                     | -                                              | 9961        | 12469                            | 14156       | 10425          | 12957          |
| 17669                                                      | 246.3527388                                    | 277.9351412 |                                  | 338.0180002 |                |                |
| 296.3066139                                                | 407.3850217                                    | 420.2388769 |                                  |             |                |                |
| ENSG00000270392                                            | 171.2103557                                    | 46.98461183 |                                  | 92.10996285 |                |                |
| 20.93931395                                                | 33.93915046                                    | 50.7745432  |                                  | 103.4349768 |                |                |
| 35.2176692                                                 | 1.54947235                                     | 0.012680999 |                                  | 1           | PFN1P2         | 1              |
| 120432204                                                  | 120434052                                      | -           |                                  | 1849        |                |                |
| transcribed_processed_pseudogene profilin 1 pseudogene 2   |                                                |             |                                  |             |                |                |
| [Source:HGNC Symbol;Acc:HGNC:24298]                        | -                                              |             |                                  | 178         | 54             | 99             |
| 19                                                         | 28                                             | 55          | 4.654620819                      | 1.272668944 |                |                |
| 2.499449228                                                | 0.570990304                                    | 0.930825946 |                                  | 1.383110239 |                |                |
| ENSG00000242615                                            | 11.54227117                                    | 8.700854042 |                                  | 10.23444032 |                | 0              |
| 0                                                          | 0                                              | 10.15918851 | 0                                | 5.686349324 |                |                |
| 0.01274374                                                 | 1                                              | AC022415.1  | 19                               | 12141806    |                |                |
| 12143322                                                   | -                                              | 1517        | transcribed_processed_pseudogene |             |                |                |
| ribosomal protein L17 (RPL17) pseudogene - 12              |                                                |             |                                  |             |                |                |
| 10                                                         | 11                                             | 0           | 0                                | 0           | 0.382469565    |                |
| 0.287258585                                                | 0.338495688                                    | 0           | 0                                | 0           |                |                |
| ENSG00000279381                                            | 17.31340676                                    | 13.05128106 |                                  | 1.86080733  |                | 0              |
| 0                                                          | 0                                              | 10.74183172 | 0                                | 5.766925404 |                |                |
| 0.012751144                                                | 1                                              | CR392039.1  | 21                               | 9088188     | 9088391        | +              |
| 204                                                        | processed_pseudogene "ankyrin repeat domain 20 |             |                                  |             |                |                |
| family, member A2 (ANKRD20A2) pseudogene" - 18 15          |                                                |             |                                  |             |                |                |
| 2                                                          | 0                                              | 0           | 0                                | 4.266223014 | 3.204200541    |                |
| 0.457663064                                                | 0                                              | 0           | 0                                |             |                |                |
| ENSG00000188986                                            | 1993.927345                                    | 2332.698969 |                                  | 2272.976154 |                |                |
| 2414.63352                                                 | 2825.434276                                    | 3275.419623 |                                  | 2199.867489 |                |                |
| 2838.495806                                                | -0.36792184                                    | 0.012765252 |                                  | 0.14903889  |                | NELFB          |
| 9                                                          | 137255173                                      | 137273546   |                                  | +           | 2698           |                |
| protein_coding negative elongation factor complex member B |                                                |             |                                  |             |                |                |
| [Source:HGNC Symbol;Acc:HGNC:24324]                        | -                                              |             |                                  | 2073        | 2681           | 2443           |
| 2191                                                       | 2331                                           | 3548        | 37.14997906                      | 43.30254946 |                |                |
| 42.26954349                                                | 45.1245076                                     | 53.10650102 |                                  | 61.14665216 |                |                |
| ENSG00000198393                                            | 1240.794151                                    | 1182.446064 |                                  | 1082.989866 |                |                |
| 918.0236065                                                | 752.7218726                                    | 943.48333   |                                  | 1168.743361 |                |                |
| 871.409603                                                 | 0.422729135                                    | 0.012789294 |                                  | 1           | ZNF26          | 12             |
| 132986365                                                  | 133032952                                      | +           |                                  | 20863       | protein_coding |                |
| zinc finger protein 26 [Source:HGNC Symbol;Acc:HGNC:13053] |                                                |             |                                  |             |                |                |
| zf-C2H2                                                    | 1290                                           | 1359        | 1164                             | 833         | 621            | 1022           |
| 2.989607461                                                | 2.838581032                                    | 2.604487384 |                                  | 2.21860653  |                |                |
| 1.829625491                                                | 2.277745283                                    |             |                                  |             |                |                |
| ENSG00000179950                                            | 6893.621457                                    | 5866.115795 |                                  | 6873.822278 |                |                |

|                                     |                                                |                       |             |                |    |
|-------------------------------------|------------------------------------------------|-----------------------|-------------|----------------|----|
| 6736.948747                         | 8559.93859                                     | 9752.404988           | 6544.519844 |                |    |
| 8349.764109                         | -0.351598219                                   | 0.012793583           | 0.14903889  | PUF60          |    |
| 8                                   | 143816344                                      | 143829859             | -           | 5424           |    |
| protein_coding                      | poly(U) binding                                | splicing factor       | 60          | [Source:HGNC   |    |
| Symbol;Acc:HGNC:17042]              | -                                              | 7167 6742             | 7388 6113   | 7062           |    |
| 10564                               | 63.88794811                                    | 54.16611221           | 63.58479007 |                |    |
| 62.62485864                         | 80.03047464                                    | 90.56069145           |             |                |    |
| ENSG00000065923                     | 618.4733636                                    | 448.9640686           | 545.2165478 |                |    |
| 425.398694                          | 349.0884047                                    | 268.6434922           | 537.5513267 |                |    |
| 347.710197                          | 0.629452949                                    | 0.012863491           | 1           | SLC9A7         | X  |
| 46599252                            | 46759172                                       | -                     | 10033       | protein_coding |    |
| solute carrier family 9             | member A7                                      | [Source:HGNC          |             |                |    |
| Symbol;Acc:HGNC:17123]              | -                                              | 643 516               | 586 386     | 288            |    |
| 291                                 | 3.098713164                                    | 2.241183865           | 2.726546066 |                |    |
| 2.137807203                         | 1.764448698                                    | 1.348631176           |             |                |    |
| ENSG00000103888                     | 233.7309912                                    | 110.5008463           | 138.6301461 |                |    |
| 87.06346328                         | 69.09041343                                    | 71.08436048           | 160.9539946 |                |    |
| 75.74607906                         | 1.08673402                                     | 0.012892635           | 1           | CEMIP          | 15 |
| 80779343                            | 80951776                                       | +                     | 7621        | protein_coding |    |
| cell migration inducing             | hyaluronidase 1                                | [Source:HGNC          |             |                |    |
| Symbol;Acc:HGNC:29213]              | -                                              | 243 127               | 149 79      | 57             |    |
| 77                                  | 1.54168458                                     | 0.726190155           | 0.912683801 |                |    |
| 0.57600622                          | 0.459737843                                    | 0.469796505           |             |                |    |
| ENSG00000166508                     | 5846.160348                                    | 5507.640609           | 6602.144408 |                |    |
| 6992.628791                         | 7397.522687                                    | 7432.469951           | 5985.315122 |                |    |
| 7274.207143                         | -0.28141304                                    | 0.012906987           | 0.14903889  | MCM7           |    |
| 7                                   | 100092728                                      | 100101940             | -           | 4386           |    |
| protein_coding                      | minichromosome maintenance complex component 7 |                       |             |                |    |
| [Source:HGNC                        | Symbol;Acc:HGNC:6950]                          | -                     | 6078 6330   | 7096           |    |
| 6345                                | 6103 8051                                      | 67.00285137           | 62.89175015 |                |    |
| 75.52504893                         | 80.38500493                                    | 85.53071505           | 85.35170821 |                |    |
| ENSG00000166262                     | 94.26188123                                    | 155.7452874           | 129.3261095 |                |    |
| 54.00138862                         | 43.63605059                                    | 71.08436048           | 126.444426  |                |    |
| 56.24059989                         | 1.165628903                                    | 0.012928899           | 1           | FAM227B        | 15 |
| 49326962                            | 49620931                                       | -                     | 6020        | protein_coding |    |
| family with sequence similarity 227 | member B                                       | [Source:HGNC          |             |                |    |
| Symbol;Acc:HGNC:26543]              | -                                              | 98 179                | 139 49      | 36             |    |
| 77                                  | 0.78710161                                     | 1.29573186            | 1.077864938 |                |    |
| 0.452284425                         | 0.367581266                                    | 0.594737403           |             |                |    |
| ENSG00000132646                     | 2855.750259                                    | 2881.722859           | 2807.958262 |                |    |
| 3891.406188                         | 3381.79392                                     | 3287.420879           | 2848.477126 |                |    |
| 3520.206996                         | -0.305364897                                   | 0.012983369           | 0.14903889  | PCNA           |    |
| 20                                  | 5114953 5126626                                | -                     | 1471        | protein_coding |    |
| proliferating cell nuclear antigen  | [Source:HGNC                                   | Symbol;Acc:HGNC:8729] |             |                |    |
| -                                   | 2969 3312                                      | 3018 3531             | 2790 3561   |                |    |
| 97.58852218                         | 98.11519089                                    | 95.77509657           | 133.381958  |                |    |
| 116.5839836                         | 112.5616159                                    |                       |             |                |    |
| ENSG00000116668                     | 272.2052285                                    | 296.6991228           | 280.9819069 |                |    |
| 115.7172613                         | 173.3320898                                    | 202.1749993           | 283.2954194 |                |    |
| 163.7414501                         | 0.789563705                                    | 0.012983754           | 1           | SWT1           | 1  |

|                                                  |                                             |                              |                         |                       |             |
|--------------------------------------------------|---------------------------------------------|------------------------------|-------------------------|-----------------------|-------------|
| 185157080                                        | 185291765                                   | +                            | 4054                    | protein_coding        |             |
| "SWT1, RNA endoribonuclease homolog [Source:HGNC |                                             |                              |                         |                       |             |
| Symbol;Acc:HGNC:16785]"                          | -                                           | 283                          | 341                     | 302                   | 105 143     |
| 219                                              | 3.375234159                                 | 3.665466312                  | 3.477516781             |                       |             |
| 1.439188229                                      | 2.168201564                                 | 2.511836625                  |                         |                       |             |
| ENSG00000156697                                  | 2717.243005                                 | 2425.798107                  | 3016.368683             |                       |             |
| 3396.577137                                      | 3391.490821                                 | 3372.352842                  | 2719.803265             |                       |             |
| 3386.806933                                      | -0.316510533                                | 0.012988139                  | 0.14903889              | UTP14A                |             |
| X                                                | 129906121                                   | 129929761                    | +                       | 4087                  |             |
| protein_coding                                   | "UTP14A, small subunit processome component |                              |                         |                       |             |
| [Source:HGNC Symbol;Acc:HGNC:10665]"             | -                                           | 2825                         | 2788                    | 3242                  |             |
| 3082                                             | 2798                                        | 3653                         | 33.42066067             | 29.726702             |             |
| 37.03005939                                      | 41.90251019                                 | 42.08142449                  | 41.56004916             |                       |             |
| ENSG00000233554                                  | 0                                           | 0                            | 0                       | 21.81802529           |             |
| 13.84760269                                      | 0                                           | 11.88854266                  | -6.133735653            | 0.013008873           |             |
| 1                                                | B4GALT1-AS1                                 | 9                            | 33166975                | 33179983              |             |
| +                                                | 843                                         | antisense                    | B4GALT1 antisense RNA 1 |                       |             |
| [Source:HGNC Symbol;Acc:HGNC:49910]              | -                                           | 0                            | 0                       | 0                     |             |
| 0                                                | 18                                          | 15                           | 0                       | 0                     |             |
| 1.31247878                                       | 0.827360347                                 |                              |                         |                       |             |
| ENSG00000145757                                  | 0                                           | 33.93333077                  | 5.582421991             | 0                     | 0           |
| 0                                                | 13.17191759                                 | 0                            | 6.062625243             | 0.013017237           |             |
| 1                                                | SPATA9                                      | 5                            | 95652181                | 95698711              | -           |
| 2811                                             | protein_coding                              | spermatogenesis associated 9 |                         |                       |             |
| [Source:HGNC Symbol;Acc:HGNC:22988]              | -                                           | 0                            | 39                      | 6                     |             |
| 0                                                | 0                                           | 0                            | 0                       | 0.604591948           | 0.099640624 |
| 0                                                | 0                                           | 0                            |                         |                       |             |
| ENSG00000196747                                  | 17.31340676                                 | 4.350427021                  | 9.304036652             | 0                     |             |
| 0                                                | 0                                           | 10.32262348                  | 0                       | 5.708675866           |             |
| 0.013115455                                      | 1                                           | HIST1H2AI                    | 6                       | 27808199              |             |
| 27808701                                         | +                                           | 503                          | protein_coding          | histone cluster 1 H2A |             |
| family member i                                  | [Source:HGNC Symbol;Acc:HGNC:4725]          | -                            | 18                      |                       |             |
| 5                                                | 10                                          | 0                            | 0                       | 1.730237564           |             |
| 0.43317224                                       | 0.928064266                                 | 0                            | 0                       | 0                     |             |
| ENSG00000267493                                  | 48.09279655                                 | 10.44102485                  | 32.56412828             |                       |             |
| 3.306207466                                      | 0                                           | 7.385388102                  | 30.36598323             | 3.563865189           |             |
| 3.057712436                                      | 0.013136652                                 | 1                            | CIRBP-AS1               | 19                    |             |
| 1267814                                          | 1270241                                     | -                            | 994                     | antisense             | CIRBP       |
| antisense RNA 1                                  | [Source:HGNC Symbol;Acc:HGNC:28588]         | -                            | 50                      |                       |             |
| 12                                               | 35                                          | 3                            | 0                       | 8                     | 2.432119089 |
| 0.52608202                                       | 1.643719456                                 | 0.167705349                  | 0                       | 0.374226571           |             |
| ENSG00000137776                                  | 1831.373693                                 | 1489.586212                  | 1836.616835             |                       |             |
| 1291.62505                                       | 1427.868544                                 | 1242.591548                  | 1719.192247             |                       |             |
| 1320.695047                                      | 0.380680145                                 | 0.013187525                  | 1                       | SLTM                  | 15          |
| 58879045                                         | 58933653                                    | -                            | 8157                    | protein_coding        |             |
| SAFB like transcription modulator [Source:HGNC   |                                             |                              |                         |                       |             |
| Symbol;Acc:HGNC:20709]                           | -                                           | 1904                         | 1712                    | 1974                  | 1172 1178   |
| 1346                                             | 11.28593899                                 | 9.146014715                  | 11.29698942             |                       |             |
| 7.983791617                                      | 8.876917596                                 | 7.67265403                   |                         |                       |             |
| ENSG00000267016                                  | 7.694847448                                 | 8.700854042                  | 13.95605498             | 0                     |             |

|                                                |                                    |                        |                          |                    |         |       |
|------------------------------------------------|------------------------------------|------------------------|--------------------------|--------------------|---------|-------|
| 0                                              | 0                                  | 10.11725216            | 0                        | 5.680584488        |         |       |
| 0.013212438                                    | 1                                  | AC111170.1             | 17                       | 77469162           |         |       |
| 77472770                                       | -                                  | 1132                   | antisense                | "novel transcript, |         |       |
| antisense to SEPT9"                            | -                                  | 8                      | 10                       | 15                 | 0       | 0     |
| 0                                              | 0.341699841                        | 0.384956955            | 0.61857287               | 0                  |         |       |
| 0                                              | 0                                  |                        |                          |                    |         |       |
| ENSG00000108298                                | 28055.41379                        | 28787.64568            | 31948.20106              |                    |         |       |
| 32428.3849                                     | 37093.06722                        | 36819.85238            | 29597.08684              |                    |         |       |
| 35447.1015                                     | -0.260215697                       | 0.013236812            | 0.150948991              | RPL19              |         |       |
| 17                                             | 39200283                           | 39204732               | +                        | 1761               |         |       |
| protein_coding                                 | ribosomal protein L19 [Source:HGNC |                        |                          |                    |         |       |
| Symbol;Acc:HGNC:10312]                         | -                                  | 29168                  | 33086                    | 34338              | 29425   | 30602 |
| 39884                                          | 800.84508                          | 818.7352843            | 910.2520719              |                    |         |       |
| 928.4727439                                    | 1068.1637                          | 1053.101836            |                          |                    |         |       |
| ENSG00000269321                                | 16.35155083                        | 8.700854042            | 5.582421991              | 0                  |         |       |
| 0                                              | 0                                  | 10.21160895            | 0                        | 5.693533345        |         |       |
| 0.013261444                                    | 1                                  | AC011466.2             | 19                       | 48145908           |         |       |
| 48147413                                       | +                                  | 359                    | antisense                | "novel transcript, |         |       |
| antisense to LIG1"                             | -                                  | 17                     | 10                       | 6                  | 0       | 0     |
| 0                                              | 2.289579296                        | 1.213847559            | 0.780194416              | 0                  |         |       |
| 0                                              | 0                                  |                        |                          |                    |         |       |
| ENSG00000155275                                | 211.6083048                        | 379.3572363            | 246.5569713              |                    |         |       |
| 166.4124425                                    | 147.877727                         | 161.5553647            | 279.1741708              |                    |         |       |
| 158.6151781                                    | 0.815887304                        | 0.013289341            | 1                        | TRMT44             | 4       |       |
| 8436140                                        | 8493531                            | +                      | 7724                     | protein_coding     | tRNA    |       |
| methyltransferase 44 homolog                   | [Source:HGNC                       | Symbol;Acc:HGNC:26653] |                          |                    |         |       |
| -                                              | 220                                | 436                    | 265                      | 151                | 122     | 175   |
| 1.377151223                                    | 2.459817132                        | 1.601583717            | 1.086292362              |                    |         |       |
| 0.970878594                                    | 1.053481229                        |                        |                          |                    |         |       |
| ENSG00000033867                                | 2067.028396                        | 1969.873355            | 1925.005183              |                    |         |       |
| 1837.149282                                    | 1441.201782                        | 1067.188581            | 1987.302311              |                    |         |       |
| 1448.513215                                    | 0.456849326                        | 0.013299298            | 1                        | SLC4A7             | 3       |       |
| 27372721                                       | 27484420                           | -                      | 9616                     | protein_coding     |         |       |
| solute carrier family 4 member 7               | [Source:HGNC                       |                        |                          |                    |         |       |
| Symbol;Acc:HGNC:11033]                         | -                                  | 2149                   | 2264                     | 2069               | 1667    | 1189  |
| 1156                                           | 10.80545794                        | 10.25983947            | 10.04412414              |                    |         |       |
| 9.632814316                                    | 7.600370439                        | 5.589775908            |                          |                    |         |       |
| ENSG00000235947                                | 7.694847448                        | 6.960683234            | 15.81686231              | 0                  |         |       |
| 0                                              | 0                                  | 10.15746433            | 0                        | 5.6861333          |         |       |
| 0.013316926                                    | 1                                  | EGOT                   | 3                        | 4749192            | 4751590 | -     |
| 1464                                           |                                    |                        |                          |                    |         |       |
| lincRNA eosinophil granule ontogeny transcript | [Source:HGNC                       |                        |                          |                    |         |       |
| Symbol;Acc:HGNC:37129]                         | -                                  | 8                      | 8                        | 17                 | 0       | 0     |
| 0                                              | 0.264210533                        | 0.238126379            | 0.542068138              | 0                  |         |       |
| 0                                              | 0                                  |                        |                          |                    |         |       |
| ENSG00000270083                                | 0                                  | 0                      | 0                        | 17.63310649        | 0       |       |
| 17.54029674                                    | 0                                  | 11.72446774            | -6.116771561             | 0.013337331        |         |       |
| 1                                              | AL021878.2                         | 22                     | 42089630                 | 42090028           |         |       |
| -                                              | 399                                | sense_intronic         | "novel transcript, sense |                    |         |       |
| intronic to NDUFA6"                            | -                                  | 0                      | 0                        | 0                  | 16      | 0     |
| 19                                             | 0                                  | 0                      | 0                        | 2.228225452        | 0       |       |

2.214173881  
ENSG0000038219 2366.16559 1517.428945 1713.803551  
1538.488541 1267.869692 1285.980703 1865.799362  
1364.112979 0.451655084 0.013345756 1 BOD1L1 4  
13568738 13627723 - 15860 protein\_coding  
biorientation of chromosomes in cell division 1 like 1  
[Source:HGNC Symbol;Acc:HGNC:31792] - 2460 1744 1842  
1396 1046 1393 7.499514353 4.791835442  
5.421662495 4.890961891 4.053926419 4.083936226  
ENSG00000184990 780.06516 689.9777256 891.3267113  
902.5946383 1069.083239 1334.908899 787.1231989  
1102.195592 -0.48652321 0.013349961 1 SIVA1 14  
104753100 104768494 + 4776 protein\_coding  
SIVA1 apoptosis inducing factor [Source:HGNC  
Symbol;Acc:HGNC:17712] - 811 793 958 819 882  
1446 8.21027592 7.235481992 9.363694302  
9.528655535 11.35145749 14.07780655  
ENSG00000163453 61.55877958 62.64614911 82.8059262  
7.714484088 37.57548801 1.846347025 69.0036183  
15.71210637 2.151632617 0.01339748 1 IGFBP7 4  
57030773 57110385 - 1930 protein\_coding  
insulin like growth factor binding protein 7 [Source:HGNC  
Symbol;Acc:HGNC:5476] - 64 72 89 7 31  
2 1.603333554 1.625675217 2.15267632  
0.201536065 0.987305929 0.048184095  
ENSG00000184216 11636.53305 8818.315572 11744.48547  
12540.44492 13501.72132 13991.61776 10733.11136  
13344.59467 -0.314261701 0.013418559 0.152077004 IRAK1  
X 154010500 154019980 - 4001  
protein\_coding interleukin 1 receptor associated kinase 1  
[Source:HGNC Symbol;Acc:HGNC:6112] - 12098 10135 12623  
11379 11139 15156 146.1996205 110.3859499  
147.2787423 158.0329291 171.1295517 176.1355676  
ENSG00000245648 1.923711862 30.45298915 1.86080733 0  
0 0 11.41250278 0 5.856123472  
0.013441382 1 AC022075.1 12 10363769  
10398506 + 2830 antisense uncharacterized  
LOC101928100 [Source:NCBI gene;Acc:101928100] - 2 35  
2 0 0 0 0.034169984 0.538939738  
0.032990553 0 0 0  
ENSG00000196091 0 0 0 9.918622399 4.848450065  
13.84760269 0 9.538225052 -5.81891277  
0.013521584 1 MYBPC1 12 101568353 101686018  
+ 7385 protein\_coding "myosin binding protein C,  
slow type [Source:HGNC Symbol;Acc:HGNC:7549]" - 0 0  
0 9 4 15 0 0  
0.067717989 0.033293301 0.094443436  
ENSG00000154122 2568.155336 2513.676733 2464.639309  
2175.484513 1989.076639 1905.43013 2515.490459  
2023.330427 0.314270691 0.013524443 1 ANKH 5

|                                                                      |              |             |             |                |
|----------------------------------------------------------------------|--------------|-------------|-------------|----------------|
| 14704800                                                             | 14871785     | -           | 12702       | protein_coding |
| ANKH inorganic pyrophosphate transport regulator [Source:HGNC        |              |             |             |                |
| Symbol;Acc:HGNC:15492]                                               | -            | 2670        | 2889        | 2649 1974 1641 |
| 2064                                                                 | 10.16343162  | 9.911377809 | 9.735446752 |                |
| 8.635491948                                                          | 7.941157924  | 7.55559382  |             |                |
| ENSG00000158859                                                      | 242.3876946  | 227.9623759 | 157.2382194 |                |
| 139.9627827                                                          | 112.726464   | 55.39041076 | 209.1960966 |                |
| 102.6932192                                                          | 1.029950424  | 0.013622776 | 1           | ADAMTS4 1      |
| 161184308                                                            | 161199056    | -           | 10334       | protein_coding |
| ADAM metalloproteinase with thrombospondin type 1 motif 4            |              |             |             |                |
| [Source:HGNC Symbol;Acc:HGNC:220]                                    | -            | 252         | 262         | 169            |
| 127                                                                  | 93           | 60          | 1.179052925 | 1.104819757    |
| 0.763421318                                                          | 0.682884582  | 0.553174117 | 0.269968946 |                |
| ENSG00000104313                                                      | 160.6299405  | 109.6307609 | 154.4470084 |                |
| 284.3338421                                                          | 350.3005172  | 161.5553647 | 141.5692366 |                |
| 265.3965747                                                          | -0.905264325 | 0.013631937 | 1           | EYA1 8         |
| 71197433                                                             | 71592025     | -           | 9418        | protein_coding |
| EYA transcriptional coactivator and phosphatase 1 [Source:HGNC       |              |             |             |                |
| Symbol;Acc:HGNC:3519]                                                | -            | 167         | 126         | 166 258 289    |
| 175                                                                  | 0.857351677  | 0.583002553 | 0.822802188 |                |
| 1.522204717                                                          | 1.886194685  | 0.863993312 |             |                |
| ENSG00000174373                                                      | 959.9322191  | 658.654651  | 788.9823081 |                |
| 633.6897644                                                          | 541.8142948  | 504.052738  | 802.5230594 |                |
| 559.8522657                                                          | 0.519557619  | 0.013636855 | 1           | RALGAP1        |
| 14                                                                   | 35538352     | 35809304    | -           | 14258          |
| protein_coding Ral GTPase activating protein catalytic alpha subunit |              |             |             |                |
| 1 [Source:HGNC Symbol;Acc:HGNC:17770]                                | -            | 998         | 757         | 848            |
| 575                                                                  | 447          | 546         | 3.384333458 | 2.313640441    |
| 2.77640794                                                           | 2.240893815  | 1.927064597 | 1.780594594 |                |
| ENSG00000237854                                                      | 200.0660336  | 174.0170808 | 220.5056687 |                |
| 121.2276071                                                          | 110.302239   | 96.01004532 | 198.196261  |                |
| 109.1799638                                                          | 0.861123048  | 0.013637066 | 1           | LINC00674      |
| 17                                                                   | 68101908     | 68115518    | +           | 734            |
| transcribed_unprocessed_pseudogene long intergenic non-protein       |              |             |             |                |
| coding RNA 674 [Source:HGNC Symbol;Acc:HGNC:44355]                   | -            |             |             | 208            |
| 200                                                                  | 237          | 110         | 91          | 104            |
| 11.87387666                                                          | 15.0729522   | 8.32738548  | 13.70151188 | 7.620661875    |
| 6.588223101                                                          |              |             |             |                |
| ENSG00000153914                                                      | 1559.168464  | 1401.707586 | 1465.385773 |                |
| 1158.274682                                                          | 1198.779279  | 1088.421572 | 1475.420608 |                |
| 1148.491844                                                          | 0.361663487  | 0.01366611  | 1           | SREK1 5        |
| 66139971                                                             | 66183615     | +           | 18240       | protein_coding |
| splicing regulatory glutamic acid and lysine rich protein 1          |              |             |             |                |
| [Source:HGNC Symbol;Acc:HGNC:17882]                                  | -            | 1621        | 1611        | 1575           |
| 1051                                                                 | 989          | 1179        | 4.296941067 | 3.848835097    |
| 4.030897548                                                          | 3.201768486  | 3.332873405 | 3.005522539 |                |
| ENSG00000241685                                                      | 467.4619824  | 509.8700469 | 612.2056117 |                |
| 730.67185                                                            | 722.4190597  | 771.7730566 | 529.8458803 |                |
| 741.6213221                                                          | -0.485301199 | 0.013708359 | 1           | ARPC1A 7       |
| 99325910                                                             | 99366262     | +           | 2053        | protein_coding |

|                                                                |                        |              |             |                |             |      |
|----------------------------------------------------------------|------------------------|--------------|-------------|----------------|-------------|------|
| actin related protein 2/3 complex subunit 1A [Source:HGNC      |                        |              |             |                |             |      |
| Symbol;Acc:HGNC:703]                                           | -                      | 486          | 586         | 658            | 663         | 596  |
| 836                                                            | 11.44586282            | 12.43847863  | 14.9617702  |                |             |      |
| 17.94471737                                                    | 17.84451179            | 18.93426043  |             |                |             |      |
| ENSG00000152234                                                | 3872.431978            | 4085.050973  | 3739.29233  |                |             |      |
| 5780.35272                                                     | 5025.418493            | 4055.501241  | 3898.925094 |                |             |      |
| 4953.757485                                                    | -0.345185812           | 0.013746245  | 0.154835001 |                |             |      |
| ATP5F1A 18                                                     | 46080248               | 46104334     | -           | 10908          |             |      |
| protein_coding ATP synthase F1 subunit alpha [Source:HGNC      |                        |              |             |                |             |      |
| Symbol;Acc:HGNC:823]                                           | -                      | 4026         | 4695        | 4019           | 5245        | 4146 |
| 4393                                                           | 17.84554673            | 18.75638182  | 17.19962241 |                |             |      |
| 26.71852055                                                    | 23.36315707            | 18.72608939  |             |                |             |      |
| ENSG00000089685                                                | 720.4300923            | 579.4768792  | 757.3485835 |                |             |      |
| 1639.878903                                                    | 878.7815743            | 713.6131253  | 685.7518517 |                |             |      |
| 1077.424534                                                    | -0.651622034           | 0.013755778  | 1           | BIRC5          | 17          |      |
| 78214186                                                       | 78225636               | +            | 3815        | protein_coding |             |      |
| baculoviral IAP repeat containing 5 [Source:HGNC               |                        |              |             |                |             |      |
| Symbol;Acc:HGNC:593]                                           | -                      | 749          | 666         | 814            | 1488        | 725  |
| 773                                                            | 9.49267237             | 7.607435601  | 9.96037979  |                |             |      |
| 21.67306994                                                    | 11.6812905             | 9.421411431  |             |                |             |      |
| ENSG00000225137                                                | 92.33816937            | 81.788028    | 63.26744923 |                |             |      |
| 136.6565753                                                    | 151.5140645            | 182.7883555  | 79.13121553 |                |             |      |
| 156.9863318                                                    | -0.989382051           | 0.013763536  | 1           | DYNC1I2P1      |             |      |
| 10                                                             | 50264978               | 50266815     | +           | 1838           |             |      |
| processed_pseudogene dynein cytoplasmic 1 intermediate chain 2 |                        |              |             |                |             |      |
| pseudogene 1 [Source:HGNC                                      | Symbol;Acc:HGNC:45012] | -            |             |                |             | 96   |
| 94                                                             | 68                     | 124          | 125         | 198            | 2.525381197 |      |
| 2.228645251                                                    | 1.727068016            | 3.748765045  | 4.180342507 |                |             |      |
| 5.00899619                                                     |                        |              |             |                |             |      |
| ENSG00000272072                                                | 76.94847448            | 15.66153728  | 33.49453195 |                |             |      |
| 2.204138311                                                    | 0                      | 14.7707762   | 42.0348479  | 5.658304838    |             |      |
| 2.860999483                                                    | 0.013796973            | 1            | AC004492.1  | 7              |             |      |
| 107192559                                                      | 107193300              | -            | 742         | antisense      |             |      |
| "novel transcript, antisense to HBP1"                          |                        |              |             |                |             |      |
| 36                                                             | 2                      | 0            | 16          | 5.212994878    | 1.057127079 |      |
| 2.264877051                                                    | 0.149774588            | 0            | 1.002644776 |                |             |      |
| ENSG00000172247                                                | 0                      | 0            | 45.18483537 | 0              | 0           |      |
| 0                                                              | 15.06161179            | -6.475208128 | 0.013820462 | 1              |             |      |
| C1QTNF4 11                                                     | 47589664               | 47594659     | -           | 1664           |             |      |
| protein_coding C1q and TNF related 4 [Source:HGNC              |                        |              |             |                |             |      |
| Symbol;Acc:HGNC:14346]                                         | -                      | 0            | 0           | 0              | 41          | 0    |
| 0                                                              | 0                      | 0            | 1.369123354 | 0              | 0           |      |
| ENSG00000041353                                                | 1002.25388             | 1273.805032  | 1168.587003 |                |             |      |
| 1974.907927                                                    | 1517.56487             | 1257.362324  | 1148.215305 |                |             |      |
| 1583.278374                                                    | -0.46296114            | 0.013832265  | 1           | RAB27B         | 18          |      |
| 54717860                                                       | 54895516               | +            | 7432        | protein_coding |             |      |
| "RAB27B, member RAS oncogene family [Source:HGNC               |                        |              |             |                |             |      |
| Symbol;Acc:HGNC:9767]"                                         | -                      | 1042         | 1464        | 1256           | 1792        | 1252 |
| 1362                                                           | 6.778962547            | 8.58408429   | 7.889145652 |                |             |      |
| 13.39813496                                                    | 10.35490188            | 8.521232689  |             |                |             |      |



|                                                                                         |                                  |                          |                             |                |      |
|-----------------------------------------------------------------------------------------|----------------------------------|--------------------------|-----------------------------|----------------|------|
| ENSG00000261315                                                                         | 17.31340676                      | 0                        | 20.46888063                 | 0              | 0    |
| 0                                                                                       | 12.5940958                       | 0                        | 5.995690563                 | 0.013843036    |      |
| 1                                                                                       | LARP4P 15                        | 36617089                 | 36619265                    |                | +    |
| 2177                                                                                    | transcribed_processed_pseudogene |                          | La                          |                |      |
| ribonucleoprotein domain family member 4 pseudogene [Source:HGNC Symbol;Acc:HGNC:21438] | -                                | 18                       | 0                           | 22             | 0    |
| 0                                                                                       | 0.399774688                      | 0                        | 0.471748239                 | 0              | 0    |
| 0                                                                                       |                                  |                          |                             |                |      |
| ENSG00000159792                                                                         | 1130.180719                      | 1128.500769              | 1122.997224                 |                |      |
| 1184.724342                                                                             | 1558.776696                      | 1840.807984              | 1127.226237                 |                |      |
| 1528.103007                                                                             | -0.439439198                     | 0.013853337              | 1                           | PSKH1          | 16   |
| 67893272                                                                                | 67929678                         | +                        | 3977                        | protein_coding |      |
| protein serine kinase H1 [Source:HGNC Symbol;Acc:HGNC:9529]                             | -                                | 1175                     | 1297                        | 1207           | 1075 |
|                                                                                         |                                  |                          |                             | 1286           | 1994 |
| 14.28510682                                                                             | 14.21160025                      | 14.16764659              | 15.01982653                 |                |      |
| 19.87617161                                                                             | 23.31312977                      |                          |                             |                |      |
| ENSG00000248428                                                                         | 0                                | 0                        | 15.42896818                 | 0              |      |
| 19.38664377                                                                             | 0                                | 11.60520398              | -6.102394039                | 0.013890485    |      |
| 1                                                                                       | AC010395.1                       | 5                        | 110970951                   | 111008899      |      |
| -                                                                                       | 697                              | lincRNA novel transcript | -                           | 0              |      |
| 0                                                                                       | 0                                | 14                       | 0                           | 21             | 0    |
| 0                                                                                       | 0                                | 0                        | 0                           | 0              | 0    |
| 1.116110776                                                                             | 0                                | 1.400933546              |                             |                |      |
| ENSG00000230160                                                                         | 0                                | 0                        | 5.510345777                 | 14.5453502     |      |
| 8.308561615                                                                             | 0                                | 9.454752529              | -5.802673244                |                |      |
| 0.013991975                                                                             | 1                                | AC004854.1               | 7                           | 44919669       |      |
| 44920329                                                                                | +                                | 349                      | processed_pseudogene        | mitochondrial  |      |
| ribosomal protein S23 (MRPS23) pseudogene                                               | -                                | 0                        | 0                           | 0              | 0    |
| 0                                                                                       | 5                                | 12                       | 9                           | 0              | 0    |
| 0.796079831                                                                             | 2.113504512                      | 1.199079838              |                             |                |      |
| ENSG00000115361                                                                         | 3.847423724                      | 4.350427021              | 23.26009163                 | 0              |      |
| 0                                                                                       | 0                                | 10.48598079              | 0                           | 5.732003701    |      |
| 0.014020886                                                                             | 1                                | ACADL 2                  | 210187939                   | 210225491      |      |
| -                                                                                       | 4383                             | protein_coding           | acyl-CoA dehydrogenase long |                |      |
| chain [Source:HGNC Symbol;Acc:HGNC:88]                                                  | -                                | 4                        | 5                           | 25             |      |
| 0                                                                                       | 0                                | 0                        | 0.04412551                  | 0.04971153     |      |
| 0.266265301                                                                             | 0                                | 0                        | 0                           |                |      |
| ENSG00000126247                                                                         | 5730.737637                      | 6311.599522              | 6216.957291                 |                |      |
| 6576.04665                                                                              | 8608.423091                      | 7391.850316              | 6086.431483                 |                |      |
| 7525.440019                                                                             | -0.306042141                     | 0.014022147              | 0.156181498                 | CAPNS1         |      |
| 19                                                                                      | 36139575                         | 36150353                 | +                           | 3478           |      |
| protein_coding calpain small subunit 1 [Source:HGNC Symbol;Acc:HGNC:1481]               | -                                | 5958                     | 7254                        | 6682           | 5967 |
|                                                                                         | 8007                             | 82.82703933              | 90.88800512                 | 89.68564368    | 7102 |
| 95.33195599                                                                             | 125.515815                       | 107.0462034              |                             |                |      |
| ENSG00000145107                                                                         | 174.0959235                      | 207.0803262              | 110.7180362                 |                |      |
| 73.83863341                                                                             | 88.48421369                      | 81.23926912              | 163.964762                  |                |      |
| 81.18737207                                                                             | 1.014850776                      | 0.014029916              | 1                           | TM4SF19 3      |      |
| 196319342                                                                               | 196338503                        | -                        | 1899                        | protein_coding |      |
| transmembrane 4 L six family member 19 [Source:HGNC Symbol;Acc:HGNC:25167]              | -                                | 181                      | 238                         | 119            | 67   |
|                                                                                         |                                  |                          |                             | 73             |      |

|                                                      |                                                       |              |                |                      |
|------------------------------------------------------|-------------------------------------------------------|--------------|----------------|----------------------|
| 88                                                   | 4.608449434                                           | 5.461483049  | 2.925283978    |                      |
| 1.960477587                                          | 2.362899528                                           | 2.154709496  |                |                      |
| ENSG00000277310                                      | 11.54227117                                           | 16.53162268  | 2.791210996    | 0                    |
| 0                                                    | 0                                                     | 10.28836828  | 0              | 5.705318155          |
| 0.014056046                                          | 1                                                     | AC090246.1   | 18             | 50256036             |
| 50256461                                             | -                                                     | 426          | sense_intronic | "novel transcript,   |
| sense intronic to CCDC11"                            |                                                       | -            | 12             | 19 3 0               |
| 0                                                    | 0                                                     | 1.36198669   | 1.943580797    | 0.328743891          |
| 0                                                    | 0                                                     | 0            |                |                      |
| ENSG00000228022                                      | 30.77938979                                           | 55.68546587  | 4.652018326    | 0                    |
| 0                                                    | 7.385388102                                           | 30.37229133  | 2.461796034    |                      |
| 3.574535235                                          | 0.014074315                                           | 1            | HCG20          | 6 30766825           |
| 30792250                                             | +                                                     | 1371         | lincRNA        | HLA complex group 20 |
| [Source:HGNC Symbol;Acc:HGNC:31334]                  |                                                       | -            | 32             | 64 5                 |
| 0                                                    | 0                                                     | 8            | 1.128531641    | 2.034234975          |
| 0.170246654                                          | 0                                                     | 0            | 0.271321088    |                      |
| ENSG00000141469                                      | 448.2248638                                           | 626.4614911  | 570.3374468    |                      |
| 279.9255655                                          | 439.9968434                                           | 352.6522819  | 548.3412672    |                      |
| 357.5248969                                          | 0.618110768                                           | 0.014094142  | 1              | SLC14A1 18           |
| 45687025                                             | 45752520                                              | +            | 7182           | protein_coding       |
| solute carrier family 14 member 1 (Kidd blood group) |                                                       |              |                |                      |
| [Source:HGNC Symbol;Acc:HGNC:10918]                  |                                                       | -            | 466            | 720 613              |
| 254                                                  | 363                                                   | 382          | 3.137196576    | 4.368634321          |
| 3.984383285                                          | 1.965171058                                           | 3.106766292  | 2.473141586    |                      |
| ENSG00000150990                                      | 3185.666843                                           | 2506.71605   | 2941.936389    |                      |
| 3176.163306                                          | 3878.760052                                           | 3918.871562  | 2878.106427    |                      |
| 3657.93164                                           | -0.346094866                                          | 0.014102117  | 0.156181498    | DHX37                |
| 12                                                   | 124946825                                             | 124989122    | -              | 6618                 |
| protein_coding                                       | DEAH-box helicase 37                                  | [Source:HGNC |                |                      |
| Symbol;Acc:HGNC:17210]                               | -                                                     | 3312         | 2881           | 3162 2882 3200       |
| 4245                                                 | 24.19718148                                           | 18.97033906  | 22.30391691    |                      |
| 24.19798802                                          | 29.72148986                                           | 29.82510284  |                |                      |
| ENSG00000197157                                      | 3793.559792                                           | 3287.182657  | 3919.790641    |                      |
| 4857.920837                                          | 4481.179973                                           | 4235.520076  | 3666.844363    |                      |
| 4524.873629                                          | -0.303325342                                          | 0.014120985  | 0.156181498    | SND1                 |
| 7                                                    | 127652180                                             | 128092609    | +              | 6500                 |
| protein_coding                                       | staphylococcal nuclease and tudor domain containing 1 |              |                |                      |
| [Source:HGNC Symbol;Acc:HGNC:30646]                  |                                                       | -            | 3944           | 3778 4213            |
| 4408                                                 | 3697                                                  | 4588         | 29.33761237    | 25.32836725          |
| 30.25687969                                          | 37.68254903                                           | 34.96096842  | 32.82018847    |                      |
| ENSG00000204577                                      | 21.16083048                                           | 40.0239286   | 41.86816493    |                      |
| 11.02069155                                          | 0                                                     | 0            | 34.35097467    | 3.673563851          |
| 3.232693323                                          | 0.014132259                                           | 1            | LILRB3         | 19 54216278          |
| 54223506                                             | -                                                     | 3736         | protein_coding | leukocyte            |
| immunoglobulin like receptor B3                      | [Source:HGNC Symbol;Acc:HGNC:6607]                    |              |                |                      |
| -                                                    | 22                                                    | 46           | 45             | 10 0 0               |
| 0.28471938                                           | 0.536549213                                           | 0.562278765  | 0.14873226     | 0                    |
| 0                                                    |                                                       |              |                |                      |
| ENSG00000163395                                      | 229.8835675                                           | 180.1076787  | 386.1175211    |                      |
| 122.3296763                                          | 44.8481631                                            | 191.0969171  | 265.3695891    |                      |

|                                       |                                                                                                                   |             |                |                |             |             |
|---------------------------------------|-------------------------------------------------------------------------------------------------------------------|-------------|----------------|----------------|-------------|-------------|
| 119.4249188                           | 1.147314841                                                                                                       | 0.014151581 | 1              | IGFN1          | 1           |             |
| 201190825                             | 201228952                                                                                                         | +           | 12116          | protein_coding |             |             |
|                                       | immunoglobulin-like and fibronectin type III domain containing                                                    |             |                |                |             |             |
| 1 [Source:HGNC Symbol;Acc:HGNC:24607] | -                                                                                                                 |             | 239            | 207            | 415         |             |
| 111                                   | 37                                                                                                                | 207         | 0.953761643    | 0.744508531    |             |             |
| 1.598949943                           | 0.509067953                                                                                                       | 0.187711042 | 0.794405238    |                |             |             |
| ENSG00000163482                       | 865.6703379                                                                                                       | 492.4683388 | 790.8431154    |                |             |             |
| 251.2717674                           | 442.4210685                                                                                                       | 594.5237422 | 716.327264     |                |             |             |
| 429.405526                            | 0.736893252                                                                                                       | 0.014227236 | 1              | STK36          | 2           |             |
| 218672026                             | 218702716                                                                                                         | +           | 6458           | protein_coding |             |             |
|                                       | serine/threonine kinase 36 [Source:HGNC Symbol;Acc:HGNC:17209]                                                    |             |                |                |             |             |
| -                                     | 900                                                                                                               | 566         | 850            | 228            | 365         | 644         |
| 6.73822774                            | 3.819240335                                                                                                       | 6.144222309 | 1.961773438    |                |             |             |
| 3.47409895                            | 4.636805136                                                                                                       |             |                |                |             |             |
| ENSG00000129038                       | 1588.985998                                                                                                       | 1545.271678 | 1737.063643    |                |             |             |
| 2180.994859                           | 2374.528419                                                                                                       | 1763.261409 | 1623.773773    |                |             |             |
| 2106.261562                           | -0.374787048                                                                                                      | 0.014254729 | 1              | LOXL1          | 15          |             |
| 73925989                              | 73952137                                                                                                          | +           | 3637           | protein_coding |             |             |
|                                       | lysyl oxidase like 1 [Source:HGNC Symbol;Acc:HGNC:6665]                                                           |             |                | -              |             |             |
| 1652                                  | 1776                                                                                                              | 1867        | 1979           | 1959           | 1910        | 21.96180132 |
| 21.27934511                           | 23.96332361                                                                                                       | 30.23531773 | 33.108423      |                |             |             |
| 24.41861819                           |                                                                                                                   |             |                |                |             |             |
| ENSG00000133935                       | 364.5433978                                                                                                       | 499.429022  | 434.4985116    |                |             |             |
| 731.7739192                           | 607.2683707                                                                                                       | 558.5199752 | 432.8236438    |                |             |             |
| 632.520755                            | -0.546538428                                                                                                      | 0.014255911 | 1              | ERG28          | 14          |             |
| 75649791                              | 75661189                                                                                                          | -           | 2633           | protein_coding |             |             |
|                                       | ergosterol biosynthesis 28 homolog [Source:HGNC Symbol;Acc:HGNC:1187]                                             |             |                | -              |             |             |
| 605                                   | 6.95968474                                                                                                        | 9.499913065 | 8.279651501    |                |             | 501         |
| 14.01294005                           | 11.69591563                                                                                                       | 10.6840407  |                |                |             |             |
| ENSG00000229647                       | 55.78764399                                                                                                       | 60.9059783  | 34.42493561    |                |             |             |
| 18.73517564                           | 13.33323768                                                                                                       | 1.846347025 | 50.37285263    |                |             |             |
| 11.30492012                           | 2.168137919                                                                                                       | 0.01427341  | 1              | MYOSLID        | 2           |             |
| 207239650                             | 207245887                                                                                                         | +           | 1204           |                |             |             |
|                                       | lincRNA "myocardin-induced smooth muscle lincRNA, inducer of differentiation [Source:HGNC Symbol;Acc:HGNC:51821]" |             |                | -              |             | 58          |
| 70                                    | 37                                                                                                                | 17          | 11             | 2              | 2.329178235 |             |
| 2.533553916                           | 1.434568442                                                                                                       | 0.784575023 | 0.56158249     |                |             |             |
| 0.077238624                           |                                                                                                                   |             |                |                |             |             |
| ENSG00000278829                       | 34.62681351                                                                                                       | 0           | 13.02565131    | 0              | 0           |             |
| 0.923173513                           | 15.88415494                                                                                                       | 0.307724504 | 5.368391076    |                |             |             |
| 0.014275319                           | 1                                                                                                                 | AC099811.5  | 17             | 42272069       |             |             |
| 42275571                              | -                                                                                                                 | 819         | sense_intronic | "novel         |             |             |
|                                       | transcript, sense intronic to STAT5B"                                                                             |             |                | -              | 36          | 0           |
| 0                                     | 0                                                                                                                 | 1           | 2.125297912    | 0              | 0.797976625 | 14          |
| 0                                     | 0                                                                                                                 | 0.056773689 |                |                |             |             |
| ENSG00000128591                       | 2914.423471                                                                                                       | 2356.191275 | 4157.97398     |                |             |             |
| 4037.981385                           | 4136.940018                                                                                                       | 4514.318477 | 3142.862908    |                |             |             |
| 4229.746627                           | -0.428655522                                                                                                      | 0.014288087 | 0.157083399    | FLNC           |             |             |
| 7                                     | 128830377                                                                                                         | 128859274   | +              | 9280           |             |             |

|                                     |                                                             |             |             |             |             |                |      |
|-------------------------------------|-------------------------------------------------------------|-------------|-------------|-------------|-------------|----------------|------|
| protein_coding                      | filamin C [Source:HGNC Symbol;Acc:HGNC:3756]                | -           |             |             |             |                |      |
| 3030                                | 2708                                                        | 4469        | 3664        | 3413        | 4890        | 15.78686404    |      |
| 12.71625656                         |                                                             | 22.48062671 |             | 21.93913661 |             | 22.60662198    |      |
| 24.50145645                         |                                                             |             |             |             |             |                |      |
| ENSG00000179943                     | 598.274389                                                  |             | 711.7298607 |             | 750.8357578 |                |      |
| 763.7339247                         | 990.2959258                                                 |             | 1159.505932 |             | 686.9466692 |                |      |
| 971.1785942                         | -0.499935142                                                |             | 0.014293088 |             | 1           | FIZ1           | 19   |
| 55591371                            |                                                             | 55601970    |             | -           | 6790        | protein_coding |      |
|                                     | FLT3 interacting zinc finger 1 [Source:HGNC                 |             |             |             |             |                |      |
| Symbol;Acc:HGNC:25917]              | zf-C2H2                                                     | 622         | 818         | 807         | 693         | 817            |      |
| 1256                                | 4.429164669                                                 |             | 5.249792368 |             | 5.548170467 |                |      |
| 5.67120706                          | 7.396046662                                                 |             | 8.601038333 |             |             |                |      |
| ENSG00000168209                     | 563.6475755                                                 |             | 729.1315688 |             | 692.2203269 |                |      |
| 221.5159002                         | 562.4202076                                                 |             | 423.7366423 |             | 661.6664904 |                |      |
| 402.5575834                         | 0.717686551                                                 |             | 0.014299769 |             | 1           | DDIT4          | 10   |
| 72273920                            |                                                             | 72276036    |             | +           | 2058        | protein_coding |      |
|                                     | DNA damage inducible transcript 4 [Source:HGNC              |             |             |             |             |                |      |
| Symbol;Acc:HGNC:24944]              | -                                                           | 586         | 838         | 744         | 201         | 464            |      |
| 459                                 | 13.76744855                                                 |             | 17.74423359 |             | 16.87615871 |                |      |
| 5.427036352                         | 13.85861948                                                 |             | 10.37046746 |             |             |                |      |
| ENSG00000243716                     | 1090.744626                                                 |             | 719.5606293 |             | 905.2827662 |                |      |
| 689.8952913                         | 614.5410458                                                 |             | 621.2957741 |             | 905.1960071 |                |      |
| 641.9107037                         | 0.49554306                                                  |             | 0.01434982  |             | 1           | NPIP5          | 16   |
| 22479121                            |                                                             | 22536521    |             | +           | 10005       | protein_coding |      |
|                                     | nuclear pore complex interacting protein family member B5   |             |             |             |             |                |      |
| [Source:HGNC Symbol;Acc:HGNC:37233] | -                                                           |             |             | 1134        | 827         | 973            |      |
| 626                                 | 507                                                         | 673         | 5.480209713 |             | 3.602027418 |                |      |
| 4.539852921                         | 3.476716542                                                 |             | 3.114857811 |             | 3.127728082 |                |      |
| ENSG00000205755                     | 2.885567793                                                 |             | 25.23247672 |             | 3.721614661 |                | 0    |
| 0                                   | 0                                                           | 10.61321973 | 0           |             | 5.751227697 |                |      |
| 0.014431683                         | 1                                                           | CRLF2       | X           | 1187549     | 1212750     | -              | 2010 |
|                                     | protein_coding cytokine receptor like factor 2 [Source:HGNC |             |             |             |             |                |      |
| Symbol;Acc:HGNC:14281]              | -                                                           | 3           | 29          | 4           | 0           | 0              |      |
| 0                                   | 0.072164966                                                 |             | 0.628724723 |             | 0.092898771 |                | 0    |
| 0                                   | 0                                                           |             |             |             |             |                |      |
| ENSG00000068784                     | 330.8784402                                                 |             | 345.4239055 |             | 302.3811912 |                |      |
| 217.1076236                         | 220.604478                                                  |             | 180.9420085 |             | 326.2278456 |                |      |
| 206.2180367                         | 0.663079815                                                 |             | 0.014468101 |             | 1           | SRBD1          | 2    |
| 45388680                            |                                                             | 45612165    |             | -           | 5045        | protein_coding |      |
|                                     | S1 RNA binding domain 1 [Source:HGNC Symbol;Acc:HGNC:25521] |             |             |             |             |                |      |
| -                                   | 344                                                         | 397         | 325         | 197         | 182         | 196            |      |
| 3.296844689                         | 3.429161459                                                 |             | 3.007240948 |             | 2.169786982 |                |      |
| 2.217469104                         | 1.80644989                                                  |             |             |             |             |                |      |
| ENSG00000136002                     | 0                                                           | 12.18119566 |             | 25.12089896 | 0           | 0              |      |
| 0                                   | 12.43403154                                                 |             | 0           | 5.978417153 | 0.014552305 |                |      |
| 1                                   | ARHGEF4                                                     | 2           | 130836916   |             | 131047263   |                | +    |
| 10611                               | protein_coding Rho guanine nucleotide exchange factor       |             |             |             |             |                |      |
| 4 [Source:HGNC Symbol;Acc:HGNC:684] | -                                                           |             |             | 0           | 14          | 27             |      |
| 0                                   | 0                                                           | 0           | 0           | 0.057495032 | 0.11878278  |                |      |
| 0                                   | 0                                                           | 0           |             |             |             |                |      |

|                               |                                                 |             |                      |             |                |             |    |
|-------------------------------|-------------------------------------------------|-------------|----------------------|-------------|----------------|-------------|----|
| ENSG00000215067               | 91.37631344                                     | 64.38631991 | 59.54583457          |             |                |             |    |
| 19.8372448                    | 20.60591278                                     | 34.15741997 | 71.76948931          |             |                |             |    |
| 24.86685918                   | 1.523143594                                     | 0.014600641 | 1                    | ALOX12-AS1  |                |             |    |
| 17                            | 6876635                                         | 7012349     | -                    | 3217        | antisense      | ALOX12      |    |
| antisense RNA 1               | [Source:HGNC Symbol;Acc:HGNC:51342]             |             |                      |             |                | -           | 95 |
| 74                            | 64                                              | 18          | 17                   | 37          | 1.427820986    |             |    |
| 1.002395842                   | 0.928698938                                     | 0.310909139 | 0.324821839          |             |                |             |    |
| 0.534788034                   |                                                 |             |                      |             |                |             |    |
| ENSG00000111669               | 17721.23367                                     | 18966.99173 | 21581.64342          |             |                |             |    |
| 20505.09871                   | 25987.69235                                     | 25199.86738 | 19423.28961          |             |                |             |    |
| 23897.55281                   | -0.299072617                                    | 0.014617135 | 0.158877008          | TPI1        |                |             |    |
| 12                            | 6867119                                         | 6870948     | +                    | 2700        | protein_coding |             |    |
| triosephosphate isomerase 1   | [Source:HGNC Symbol;Acc:HGNC:12009]             |             |                      |             |                | -           |    |
| 18424                         | 21799                                           | 23196       | 18606                | 21440       | 27297          | 329.9296735 |    |
|                               | 351.8288145                                     | 401.0470921 | 382.9140449          | 488.0995161 |                |             |    |
|                               | 470.0912567                                     |             |                      |             |                |             |    |
| ENSG00000168282               | 64.44434737                                     | 69.60683234 | 89.31875186          |             |                |             |    |
| 11.02069155                   | 38.78760052                                     | 24.00251133 | 74.45664386          |             |                |             |    |
| 24.60360114                   | 1.601547849                                     | 0.014639907 | 1                    | MGAT2       | 14             |             |    |
|                               | 49620795                                        | 49623481    | +                    | 2687        | protein_coding |             |    |
|                               | "mannosyl (alpha-1,6-)-glycoprotein beta-1,2-N- |             |                      |             |                |             |    |
| acetylglucosaminyltransferase | [Source:HGNC Symbol;Acc:HGNC:7045]"             |             |                      |             |                |             |    |
| -                             | 67                                              | 80          | 96                   | 10          | 32             | 26          |    |
| 1.205614195                   | 1.297420986                                     | 1.667821632 | 0.206797068          |             |                |             |    |
| 0.732031336                   | 0.449921451                                     |             |                      |             |                |             |    |
| ENSG00000146535               | 3935.914469                                     | 3684.811687 | 3755.109193          |             |                |             |    |
| 4693.712533                   | 4519.967573                                     | 4473.698843 | 3791.945116          |             |                |             |    |
| 4562.45965                    | -0.266886184                                    | 0.014683603 | 0.158877008          | GNA12       |                |             |    |
| 7                             | 2728112                                         | 2844324     | -                    | 6120        | protein_coding | G           |    |
| protein subunit alpha 12      | [Source:HGNC Symbol;Acc:HGNC:4380]              |             |                      |             |                | -           |    |
| 4092                          | 4235                                            | 4036        | 4259                 | 3729        | 4846           | 32.32848995 |    |
|                               | 30.15508731                                     | 30.78546879 | 38.66947373          | 37.45314754 |                |             |    |
|                               | 36.81823843                                     |             |                      |             |                |             |    |
| ENSG00000232716               | 43.28351689                                     | 0           | 5.582421991          | 1.102069155 |                |             |    |
| 0                             | 0                                               | 16.28864629 | 0.367356385          | 5.404560309 |                |             |    |
| 0.014723518                   | 1                                               | AC016831.2  | 7                    | 130840204   |                |             |    |
| 130843725                     | -                                               | 1723        | processed_pseudogene | zinc        |                |             |    |
| finger protein 131 (ZNF131)   | pseudogene                                      |             |                      |             |                | -           |    |
| 1                             | 0                                               | 0           | 1.262782204          | 0           | 0.16255937     |             |    |
|                               | 0.032249781                                     | 0           | 0                    |             |                |             |    |
| ENSG00000110092               | 8431.629091                                     | 8921.855735 | 10373.07046          |             |                |             |    |
| 8397.766964                   | 6242.379459                                     | 7485.090841 | 9242.185096          |             |                |             |    |
| 7375.079088                   | 0.325479059                                     | 0.014793435 | 0.158877008          | CCND1       |                |             |    |
| 11                            | 69641087                                        | 69654474    | +                    | 4830        |                |             |    |
| protein_coding cyclin D1      | [Source:HGNC Symbol;Acc:HGNC:1582]              |             |                      |             |                | -           |    |
| 8766                          | 10254                                           | 11149       | 7620                 | 5150        | 8108           | 87.75170269 |    |
|                               | 92.51342938                                     | 107.7543522 | 87.66371764          | 65.54015415 |                |             |    |
|                               | 78.05444272                                     |             |                      |             |                |             |    |
| ENSG00000106628               | 4737.14046                                      | 4669.748365 | 5053.952709          |             |                |             |    |
| 5250.257456                   | 6264.197484                                     | 6099.407399 | 4820.280511          |             |                |             |    |

|                 |                                                                                |             |                      |            |
|-----------------|--------------------------------------------------------------------------------|-------------|----------------------|------------|
| 5871.287446     | -0.284570345                                                                   | 0.014836319 | 0.158877008          | POLD2      |
| 7               | 44114681                                                                       | 44124358    | - 3695               |            |
| protein_coding  | "DNA polymerase delta 2, accessory subunit [Source:HGNC Symbol;Acc:HGNC:9176]" |             |                      |            |
| 4764            | 5168 6607                                                                      | 64.445561   | 63.2959249           | 5432       |
| 68.62642166     | 71.64227258                                                                    | 85.97168177 | 83.14207942          |            |
| ENSG00000279031 | 24.04639827                                                                    | 13.05128106 | 0 0                  | 0          |
| 0               | 12.36589311                                                                    | 0           | 5.969837021          | 0.01484786 |
| 1               | AC004232.3                                                                     | 16          | 3292879 3293403 +    | 525        |
| TEC             | TEC -                                                                          | 25 15       | 0 0                  | 0          |
| 0               | 2.302406071                                                                    | 1.245060782 | 0 0                  | 0          |
| 0               |                                                                                |             |                      |            |
| ENSG00000110108 | 4309.114571                                                                    | 4096.362083 | 4886.48005           |            |
| 5102.58019      | 5443.597311                                                                    | 5692.287879 | 4430.652234          |            |
| 5412.821793     | -0.288976984                                                                   | 0.014883903 | 0.158877008          |            |
| TMEM109 11      | 60913874                                                                       | 60923443    | + 2421               |            |
| protein_coding  | transmembrane protein 109 [Source:HGNC Symbol;Acc:HGNC:28771]                  |             |                      |            |
| 6166            | 89.47144286                                                                    | 84.74230301 | 101.26887            | 4491       |
| 106.2669572     | 114.0238303                                                                    | 118.4240063 |                      |            |
| ENSG00000232097 | 6.732991517                                                                    | 16.53162268 | 6.512825656          | 0          |
| 0               | 0                                                                              | 9.925813285 | 0                    | 5.65386963 |
| 0.014890483     | 1                                                                              | AC079781.3  | 7                    | 97938439   |
| 97938794        | -                                                                              | 356         | processed_pseudogene | novel      |
| pseudogene      | -                                                                              | 7           | 19                   | 7 0 0      |
| 0.950712619     | 2.325745561                                                                    | 0.917897269 | 0                    | 0          |
| 0               |                                                                                |             |                      |            |
| ENSG00000271032 | 0 0                                                                            | 4.652018326 | 20.93931395          |            |
| 20.60591278     | 21.23299079                                                                    | 1.550672775 |                      |            |
| 20.92607251     | -3.759120716                                                                   | 0.014934965 | 1                    | AC020907.4 |
| 19              | 35014961                                                                       | 35025335    | -                    | 526        |
| antisense       | novel transcript                                                               |             |                      |            |
| 19              | 17 23                                                                          | 0 0         | 0.443741754          | 5          |
| 2.007150327     | 1.986600486                                                                    | 2.033167271 |                      |            |
| ENSG00000186480 | 1941.987125                                                                    | 2630.268177 | 2229.247182          |            |
| 3717.279261     | 3576.944036                                                                    | 2126.0686   | 2267.167494          |            |
| 3140.097299     | -0.469388273                                                                   | 0.014974905 | 0.158924425          | INSIG1     |
| 7               | 155297776                                                                      | 155310235   | + 3650               |            |
| protein_coding  | insulin induced gene 1 [Source:HGNC Symbol;Acc:HGNC:6083]                      |             |                      |            |
| 2303            | 26.7451274                                                                     | 36.0914126  | 30.64361414          | 2951       |
| 51.34941738     | 49.69625989                                                                    | 29.33810723 |                      |            |
| ENSG00000276916 | 53.86393213                                                                    | 37.41367238 | 34.42493561          |            |
| 12.12276071     | 3.636337549                                                                    | 12.92442918 | 41.90084671          |            |
| 9.561175812     | 2.12042461                                                                     | 0.015139652 | 1                    | AL442125.2 |
| 13              | 113511747                                                                      | 113514473   | + 418                |            |
| sense_intronic  | "novel transcript, sense intronic"                                             |             |                      |            |
| 43              | 37 11                                                                          | 3 14        | 6.477582631          | 56         |
| 4.482814536     | 4.132106231                                                                    | 1.462272953 | 0.441156145          |            |
| 1.55733761      |                                                                                |             |                      |            |

|                                                                    |              |             |                |             |                      |             |             |
|--------------------------------------------------------------------|--------------|-------------|----------------|-------------|----------------------|-------------|-------------|
| ENSG00000176563                                                    | 36.55052538  |             | 35.67350157    |             | 33.49453195          |             |             |
| 6.612414933                                                        | 0            | 10.15490864 |                | 35.23951963 |                      | 5.589107858 |             |
|                                                                    | 2.63328868   | 0.015140205 |                | 1           | CNTD1                | 17          |             |
| 42798792                                                           | 42811587     |             | +              | 3378        | protein_coding       | cyclin      |             |
| N-terminal domain containing 1 [Source:HGNC Symbol;Acc:HGNC:26847] |              |             |                |             |                      |             |             |
|                                                                    | -            | 38          | 41             | 36          | 6                    | 0           | 11          |
| 0.543907651                                                        | 0.528911256  |             | 0.497495196    |             | 0.098696931          |             | 0           |
|                                                                    | 0.151413312  |             |                |             |                      |             |             |
| ENSG00000154529                                                    | 0            | 0           | 0              | 1.102069155 |                      | 19.39380026 |             |
|                                                                    | 9.231735127  | 0           | 9.909201515    |             | -5.869994003         |             |             |
| 0.015175529                                                        | 1            | CNTNAP3B    |                | 9           | 41890314             |             |             |
| 42129510                                                           | -            | 13220       | protein_coding |             | contactin associated |             |             |
| protein like 3B [Source:HGNC Symbol;Acc:HGNC:32035]                |              |             |                |             |                      |             |             |
|                                                                    | -            |             |                |             |                      |             | 0           |
|                                                                    | 0            | 0           | 1              | 16          | 10                   | 0           | 0           |
|                                                                    | 0.004203205  | 0.074393654 |                | 0.035172202 |                      |             |             |
| ENSG00000129195                                                    | 258.7392454  |             | 213.170924     |             | 234.4617236          |             |             |
| 580.7904449                                                        | 374.5427675  |             | 252.9495425    |             | 235.4572977          |             |             |
| 402.7609183                                                        | -0.773728407 |             | 0.015195445    |             | 1                    | PIMREG      | 17          |
|                                                                    | 6444415      | 6451469     | +              | 2823        | protein_coding       | PICALM      |             |
| interacting mitotic regulator [Source:HGNC Symbol;Acc:HGNC:25483]  |              |             |                |             |                      |             |             |
|                                                                    | -            | 269         | 245            | 252         | 527                  | 309         | 274         |
| 4.607258907                                                        | 3.781932767  |             | 4.16711704     |             | 10.37317682          |             |             |
| 6.728139097                                                        | 4.513055796  |             |                |             |                      |             |             |
| ENSG00000166275                                                    | 287.5949234  |             | 394.1486881    |             | 331.2237048          |             |             |
| 415.4800716                                                        | 504.2388068  |             | 624.9884681    |             | 337.6557721          |             |             |
| 514.9024488                                                        | -0.609129474 |             | 0.015213538    |             | 1                    | BORCS7      | 10          |
|                                                                    | 102854223    | 102864961   | +              | 2708        | protein_coding       |             |             |
| BLOC-1 related complex subunit 7 [Source:HGNC                      |              |             |                |             |                      |             |             |
| Symbol;Acc:HGNC:23516]                                             |              |             |                |             |                      |             |             |
|                                                                    | -            |             | 299            | 453         | 356                  | 377         | 416         |
|                                                                    | 677          | 5.338555288 |                | 7.289674554 |                      | 6.136876362 |             |
| 7.735791108                                                        | 9.442609523  |             | 11.62441287    |             |                      |             |             |
| ENSG00000133142                                                    | 833.9290921  |             | 937.9520658    |             | 925.7516469          |             |             |
| 705.3242595                                                        | 512.7235944  |             | 719.1521664    |             | 899.2109349          |             |             |
| 645.7333401                                                        | 0.476679463  |             | 0.015219623    |             | 1                    | TCEAL4      | X           |
|                                                                    | 103576231    | 103587736   | +              | 2518        | protein_coding       |             |             |
| transcription elongation factor A like 4 [Source:HGNC              |              |             |                |             |                      |             |             |
| Symbol;Acc:HGNC:26121]                                             |              |             |                |             |                      |             |             |
|                                                                    | -            |             | 867            | 1078        | 995                  | 640         | 423         |
|                                                                    | 779          | 16.64809664 |                | 18.65613316 |                      | 18.44647514 |             |
| 14.1233035                                                         | 10.32599717  |             | 14.38509552    |             |                      |             |             |
| ENSG00000253167                                                    | 0.961855931  |             | 0              | 40.0073576  |                      | 0           | 0           |
|                                                                    | 0            | 13.65640451 |                | 0           | 6.113044443          |             | 0.015260207 |
|                                                                    | 1            | WASHC5-AS1  |                | 8           | 125040684            |             | 125044989   |
|                                                                    | +            | 587         | antisense      |             | WASHC5 antisense RNA | 1           |             |
| [Source:HGNC Symbol;Acc:HGNC:43440]                                |              |             |                |             |                      |             |             |
|                                                                    | -            |             |                | 1           | 0                    |             | 43          |
|                                                                    | 0            | 0           | 0              | 0.082368871 | 0                    | 3.419608518 |             |
|                                                                    | 0            | 0           | 0              |             |                      |             |             |
| ENSG00000235079                                                    | 16.35155083  |             | 14.79145187    |             | 5.582421991          |             |             |
| 1.102069155                                                        | 0            | 0           | 12.24180823    |             | 0.367356385          |             |             |
| 4.99385105                                                         | 0.015283256  |             | 1              | ZRANB2-AS1  |                      | 1           |             |
| 71048855                                                           | 71067184     |             | +              | 967         | antisense            |             | ZRANB2      |

|                                                                      |                                              |             |             |                  |                |        |
|----------------------------------------------------------------------|----------------------------------------------|-------------|-------------|------------------|----------------|--------|
| antisense RNA 1 [Source:HGNC Symbol;Acc:HGNC:43594]                  | -                                            | 17          |             |                  |                |        |
| 17                                                                   | 6                                            | 1           | 0           | 0                | 0.850009273    |        |
| 0.766092208                                                          | 0.289648185                                  |             | 0.057462639 | 0                | 0              |        |
| ENSG00000279583                                                      | 18.27526269                                  |             | 6.960683234 |                  | 4.652018326    | 0      |
| 0                                                                    | 0                                            | 9.962654749 | 0           |                  | 5.657662039    |        |
| 0.015349836                                                          | 1                                            | AC009086.3  | 16          |                  | 29595130       |        |
| 29596137                                                             | -                                            | 1008        | TEC         | novel transcript |                | -      |
| 19                                                                   | 8                                            | 5           | 0           | 0                | 0.91136907     |        |
| 0.345850217                                                          | 0.231555717                                  |             | 0           | 0                | 0              |        |
| ENSG00000141543                                                      | 4153.29391                                   |             | 3792.702277 |                  | 3733.709908    |        |
| 4571.382857                                                          | 4808.450352                                  |             | 4712.800782 |                  | 3893.235365    |        |
| 4697.544664                                                          | -0.270964678                                 |             | 0.015437511 |                  | 0.162253262    | EIF4A3 |
| 17                                                                   | 80135214                                     |             | 80147183    | -                | 4967           |        |
| protein_coding                                                       | eukaryotic translation initiation factor 4A3 |             |             |                  |                |        |
| [Source:HGNC Symbol;Acc:HGNC:18683]                                  | -                                            |             | 4318        | 4359             |                | 4013   |
| 4148                                                                 | 3967                                         | 5105        | 42.0329329  |                  | 38.24294305    |        |
| 37.71560126                                                          | 46.40412963                                  |             | 49.09252847 |                  | 47.78951297    |        |
| ENSG00000206053                                                      | 1607.261261                                  |             | 1713.198161 |                  | 1657.048928    |        |
| 2011.276209                                                          | 2119.984791                                  |             | 2055.907413 |                  | 1659.16945     |        |
| 2062.389471                                                          | -0.313715225                                 |             | 0.015462927 | 1                | JPT2           | 16     |
| 1678256                                                              | 1702280 +                                    |             | 4768        | protein_coding   | Jupiter        |        |
| microtubule associated homolog 2 [Source:HGNC Symbol;Acc:HGNC:14137] |                                              |             |             |                  |                |        |
| -                                                                    | 1671                                         | 1969        | 1781        | 1825             | 1749           | 2227   |
| 16.94499401                                                          | 17.99567193                                  |             | 17.43707793 |                  | 21.26858835    |        |
| 22.54763121                                                          | 21.71775795                                  |             |             |                  |                |        |
| ENSG00000163041                                                      | 2228.620192                                  |             | 2483.223744 |                  | 2453.474465    |        |
| 3011.955002                                                          | 3031.493403                                  |             | 2779.675447 |                  | 2388.439467    |        |
| 2941.041284                                                          | -0.299981341                                 |             | 0.015465316 |                  | 0.162253262    | H3F3A  |
| 1                                                                    | 226061851                                    |             | 226072001   | +                | 3146           |        |
| protein_coding                                                       | H3 histone family member 3A [Source:HGNC     |             |             |                  |                |        |
| Symbol;Acc:HGNC:4764]                                                | -                                            |             | 2317        | 2854             | 2637           | 2733   |
| 3011                                                                 | 35.6097178                                   |             | 39.53246073 |                  | 39.12888272    | 2501   |
| 48.27174038                                                          | 48.86549851                                  |             | 44.50236131 |                  |                |        |
| ENSG00000197172                                                      | 1776.547904                                  |             | 1738.430638 |                  | 1673.796194    |        |
| 1996.94931                                                           | 2187.863092                                  |             | 2299.62522  |                  | 1729.591579    |        |
| 2161.479207                                                          | -0.321777122                                 |             | 0.015479451 | 1                | MAGEA6         | X      |
| 152766136                                                            | 152769747                                    |             | -           | 1863             | protein_coding |        |
| MAGE family member A6 [Source:HGNC Symbol;Acc:HGNC:6804]             |                                              |             |             |                  |                |        |
| -                                                                    | 1847                                         | 1998        | 1799        | 1812             | 1805           | 2491   |
| 47.93527873                                                          | 46.73489021                                  |             | 45.07796939 |                  | 54.04523158    |        |
| 59.55410627                                                          | 62.17157804                                  |             |             |                  |                |        |
| ENSG00000183688                                                      | 522.2877705                                  |             | 553.3743171 |                  | 417.7512457    |        |
| 732.8759884                                                          | 819.388061                                   |             | 595.4469157 |                  | 497.8044444    |        |
| 715.903655                                                           | -0.523112551                                 |             | 0.015482377 | 1                | RFLNB          | 17     |
| 439978                                                               | 445939                                       | -           | 3621        | protein_coding   | refilin B      |        |
| [Source:HGNC Symbol;Acc:HGNC:28705]                                  | -                                            |             |             | 543              | 636            | 449    |
| 665                                                                  | 676                                          | 645         | 7.250576202 |                  | 7.65397763     |        |
| 5.788470869                                                          | 10.20481566                                  |             | 11.47533919 |                  | 8.282514559    |        |
| ENSG00000137343                                                      | 533.8300417                                  |             | 482.027314  |                  | 615.9272264    |        |
| 362.5807521                                                          | 421.8151557                                  |             | 332.3424646 |                  | 543.928194     |        |



|                                                          |                         |              |                        |                    |             |             |
|----------------------------------------------------------|-------------------------|--------------|------------------------|--------------------|-------------|-------------|
| 372.2461241                                              | 0.548170432             | 0.015552737  | 1                      | ATAT1              | 6           |             |
| 30626842                                                 | 30646823                | +            | 4035                   | protein_coding     |             |             |
| alpha tubulin acetyltransferase 1 [Source:HGNC           |                         |              |                        |                    |             |             |
| Symbol;Acc:HGNC:21186]                                   | -                       | 555          | 554                    | 662                | 329         | 348         |
| 360                                                      | 6.650444302             | 5.983080187  | 7.658795725            |                    |             |             |
| 4.530690571                                              | 5.301308343             | 4.148489353  |                        |                    |             |             |
| ENSG00000258858                                          | 14.42783896             | 2.610256213  | 13.02565131            | 0                  |             |             |
| 0                                                        | 0                       | 10.02124883  | 0                      | 5.665909222        |             |             |
| 0.015640076                                              | 1                       | AL583722.4   | 14                     | 104690091          |             |             |
| 104691284                                                | -                       | 716          | antisense              | "novel transcript, |             |             |
| antisense to INF2"                                       | -                       | 15           | 3                      | 14                 | 0           | 0           |
| 0                                                        | 1.012930045             | 0.182585729  | 0.912769352            | 0                  |             |             |
| 0                                                        | 0                       |              |                        |                    |             |             |
| ENSG00000248487                                          | 130.8124066             | 163.576056   | 198.1759807            |                    |             |             |
| 239.1490067                                              | 298.179679              | 291.72283    | 164.1881478            |                    |             |             |
| 276.3505053                                              | -0.750929739            | 0.015657725  | 1                      | ABHD14A            | 3           |             |
| 51971426                                                 | 51981199                | +            | 2378                   | protein_coding     |             |             |
| abhydrolase domain containing 14A [Source:HGNC           |                         |              |                        |                    |             |             |
| Symbol;Acc:HGNC:24538]                                   | -                       | 136          | 188                    | 213                | 217         | 246         |
| 316                                                      | 2.765210992             | 3.445121927  | 4.18132369             |                    |             |             |
| 5.070606715                                              | 6.358733402             | 6.178830056  |                        |                    |             |             |
| ENSG00000163166                                          | 822.386821              | 1015.389667  | 784.3302898            |                    |             |             |
| 624.8732111                                              | 667.8739965             | 624.9884681  | 874.0355925            |                    |             |             |
| 639.2452252                                              | 0.451842                | 0.015673376  | 1                      | IWS1               | 2           |             |
| 127436207                                                | 127526886               | -            | 4150                   | protein_coding     |             |             |
| "IWS1, SUPT6H interacting protein [Source:HGNC           |                         |              |                        |                    |             |             |
| Symbol;Acc:HGNC:25467]"                                  | -                       | 855          | 1167                   | 843                | 567         | 551         |
| 677                                                      | 9.961373736             | 12.25409822  | 9.482558131            |                    |             |             |
| 7.591839286                                              | 8.161140645             | 7.585279534  |                        |                    |             |             |
| ENSG00000204392                                          | 1311.009634             | 1269.454605  | 1199.290324            |                    |             |             |
| 1478.976807                                              | 1656.95781              | 1678.329446  | 1259.918188            |                    |             |             |
| 1604.754688                                              | -0.349137021            | 0.015685635  | 1                      | LSM2               | 6           |             |
| 31797396                                                 | 31806984                | -            | 1077                   | protein_coding     |             |             |
| "LSM2 homolog, U6 small nuclear RNA and mRNA degradation |                         |              |                        |                    |             |             |
| associated [Source:HGNC                                  | Symbol;Acc:HGNC:13940]" | -            | 1363                   | 1459               |             |             |
| 1289                                                     | 1342                    | 1367         | 1818                   | 61.19012904        | 59.03345293 |             |
| 55.87058901                                              | 69.2386922              | 78.01896263  | 78.48907189            |                    |             |             |
| ENSG00000144848                                          | 1355.255007             | 1562.673386  | 1389.092672            |                    |             |             |
| 2011.276209                                              | 1682.412173             | 1809.420085  | 1435.673688            |                    |             |             |
| 1834.369489                                              | -0.353515251            | 0.015696073  | 1                      | ATG3               | 3           |             |
| 112532509                                                | 112562046               | -            | 6111                   | protein_coding     |             |             |
| autophagy related 3 [Source:HGNC                         |                         |              |                        |                    |             |             |
| Symbol;Acc:HGNC:20962]                                   | -                       | 1409         | 1796                   | 1493               | 1825        | 1388        |
| 1409                                                     | 1796                    | 1493         | 1825                   | 1388               | 1960        | 11.14807613 |
| 12.80715443                                              | 11.40495457             | 16.59444105  | 13.96125767            |                    |             |             |
| 14.91333611                                              |                         |              |                        |                    |             |             |
| ENSG00000110427                                          | 1332.170464             | 1296.427252  | 1197.429517            |                    |             |             |
| 1117.498124                                              | 907.8722747             | 866.8599285  | 1275.342411            |                    |             |             |
| 964.0767756                                              | 0.403946067             | 0.015738223  | 1                      | KIAA1549L          |             |             |
| 11                                                       | 33376466                | 33674102     | +                      | 13012              |             |             |
| protein_coding                                           | KIAA1549 like           | [Source:HGNC | Symbol;Acc:HGNC:24836] |                    |             |             |

|                                                              |                                                       |             |              |                                |                |             |
|--------------------------------------------------------------|-------------------------------------------------------|-------------|--------------|--------------------------------|----------------|-------------|
| -                                                            | 1385                                                  | 1490        | 1287         | 1014                           | 749            | 939         |
| 5.146440253                                                  | 4.990003055                                           |             | 4.617219574  |                                | 4.330179943    |             |
| 3.538222365                                                  | 3.355463784                                           |             |              |                                |                |             |
| ENSG00000205143                                              | 29.81753386                                           |             | 6.09059783   |                                | 27.91210996    |             |
| 4.408276622                                                  | 0                                                     | 0           | 21.27341388  |                                | 1.469425541    |             |
| 3.867178331                                                  | 0.015791054                                           |             | 1            | ARID3C                         | 9              | 34621379    |
| 34628107                                                     | -                                                     |             | 1411         | protein_coding                 |                | AT-rich     |
| interaction domain 3C [Source:HGNC Symbol;Acc:HGNC:21209]    |                                                       |             |              |                                |                | ARID        |
| 31                                                           | 7                                                     | 30          | 4            | 0                              | 0              | 1.062272397 |
| 0.216187024                                                  | 0.992522308                                           |             | 0.15752338   |                                | 0              | 0           |
| ENSG00000259488                                              | 0                                                     | 32.19315996 | 27.91210996  |                                | 2.204138311    |             |
| 0                                                            | 0                                                     | 20.03508997 | 0.73471277   |                                | 4.78581263     |             |
| 0.015793843                                                  | 1                                                     | AC023355.1  | 15           |                                | 48312353       |             |
| 48331856                                                     | -                                                     | 4710        | antisense    |                                | "novel         |             |
| transcript, antisense to DUT"                                |                                                       |             | -            | 0                              | 37             | 30          |
| 0                                                            | 0                                                     | 0           | 0.342325629  |                                | 0.297335239    | 2           |
| 0.023595063                                                  | 0                                                     | 0           |              |                                |                |             |
| ENSG00000233913                                              | 2861.521395                                           |             | 4555.767177  |                                | 4041.673522    |             |
| 4899.799465                                                  | 4796.329227                                           |             | 5191.004662  |                                | 3819.654031    |             |
| 4962.377785                                                  | -0.377516151                                          |             | 0.015824361  |                                | 0.165076859    |             |
| RPL10P9 5                                                    | 168616352                                             |             | 168616996    |                                | +              | 645         |
| processed_pseudogene                                         | ribosomal                                             | protein L10 | pseudogene 9 |                                |                |             |
| [Source:HGNC Symbol;Acc:HGNC:35579]                          |                                                       |             | -            | 2975                           | 5236           | 4344        |
| 4446                                                         | 3957                                                  | 5623        | 223.0121229  |                                | 353.7516881    |             |
| 314.3953672                                                  | 383.0202958                                           |             | 377.097537   |                                | 405.3585959    |             |
| ENSG00000223519                                              | 11.54227117                                           |             | 13.92136647  |                                | 10.23444032    | 0           |
| 1.212112516                                                  | 0                                                     |             | 11.89935932  |                                | 0.404037505    |             |
| 4.953098456                                                  | 0.015830652                                           |             | 1            | KIF28P                         | 1              | 246771837   |
| 246839611                                                    | -                                                     |             | 3525         | transcribed_unitary_pseudogene |                |             |
| "kinesin family member 28, pseudogene [Source:HGNC           |                                                       |             |              |                                |                |             |
| Symbol;Acc:HGNC:49205]"                                      | -                                                     |             | 12           | 16                             | 11             | 0           |
| 0                                                            | 0.16459754                                            |             | 0.19779689   |                                | 0.14567318     | 0           |
| 0.017437661                                                  | 0                                                     |             |              |                                |                |             |
| ENSG00000188981                                              | 30.77938979                                           |             | 0            | 6.512825656                    | 0              | 0           |
| 0                                                            | 12.43073848                                           |             | 0            | 5.976491815                    | 0.015884406    |             |
| 1                                                            | MSANTD1 4                                             |             | 3244369      | 3271738                        | +              | 7553        |
| protein_coding                                               | Myb/SANT DNA binding domain containing 1 [Source:HGNC |             |              |                                |                |             |
| Symbol;Acc:HGNC:33741]                                       | -                                                     |             | 32           | 0                              | 7              | 0           |
| 0                                                            | 0.204847991                                           |             | 0            | 0.043263793                    | 0              | 0           |
| 0                                                            |                                                       |             |              |                                |                |             |
| ENSG00000198712                                              | 56497.49367                                           |             | 52222.52596  |                                | 53802.45275    |             |
| 49768.34099                                                  | 78359.43784                                           |             | 81097.1004   |                                | 54174.15746    |             |
| 69741.62641                                                  | -0.364423771                                          |             | 0.015930406  |                                | 0.165244215    | MT-C02      |
| MT                                                           | 7586                                                  | 8269        | +            | 684                            | protein_coding |             |
| mitochondrially encoded cytochrome c oxidase II [Source:HGNC |                                                       |             |              |                                |                |             |
| Symbol;Acc:HGNC:7421]                                        | -                                                     |             | 58738        | 60020                          | 57827          | 45159       |
| 87846                                                        | 4152.066204                                           |             | 3823.829216  |                                | 3946.577143    | 64647       |
| 3668.599126                                                  | 5809.511749                                           |             | 5971.685225  |                                |                |             |
| ENSG00000271869                                              | 20.19897455                                           |             | 7.830768638  |                                | 8.373632987    | 0           |
| 0                                                            | 0.923173513                                           |             | 12.13445872  |                                | 0.307724504    |             |

|                       |                     |                        |                        |              |                |             |
|-----------------------|---------------------|------------------------|------------------------|--------------|----------------|-------------|
| 4.980312634           | 0.015945155         | 1                      | AC026979.2             | 8            |                |             |
| 30155830              | 30156232            | -                      | 403                    | lincRNA      | novel          |             |
| transcript            | -                   | 21                     | 9                      | 9            | 0              | 1           |
|                       | 2.519506395         | 0.973186467            | 1.042517849            | 0            | 0              | 0           |
|                       | 0.115378788         |                        |                        |              |                |             |
| ENSG00000130176       | 4.809279655         | 7.830768638            | 16.74726597            | 0            |                |             |
|                       | 0                   | 9.795771422            | 0                      | 5.634075855  |                |             |
| 0.016042273           | 1                   | CNN1                   | 19                     | 11538717     | 11550323       |             |
| +                     | 2887                | protein_coding         | calponin 1             | [Source:HGNC |                |             |
| Symbol;Acc:HGNC:2155] | -                   | 5                      | 9                      | 18           | 0              | 0           |
|                       | 0                   | 0.083738357            | 0.135848336            | 0.291052784  | 0              | 0           |
|                       | 0                   |                        |                        |              |                |             |
| ENSG00000105220       | 4481.286782         | 5520.69189             | 6871.961471            |              |                |             |
| 7247.206766           | 7375.704662         | 6881.335364            | 5624.646714            |              |                |             |
| 7168.082264           | -0.349749579        | 0.016093086            | 0.165993853            |              |                | GPI         |
|                       | 19                  | 34359480               | 34402413               | +            | 10680          |             |
| protein_coding        | glucose-6-phosphate | isomerase              | [Source:HGNC           |              |                |             |
| Symbol;Acc:HGNC:4458] | -                   | 4659                   | 6345                   | 7386         | 6576           | 6085        |
|                       | 7454                | 21.09223854            | 25.88922032            | 32.28375824  |                |             |
| 34.21390109           | 35.02165698         | 32.45257437            |                        |              |                |             |
| ENSG00000232640       | 43.28351689         | 0                      | 4.652018326            | 1.102069155  |                |             |
|                       | 0                   | 15.97851174            | 0.367356385            | 5.376812448  |                |             |
|                       | 0.016102169         | 1                      | AL354892.2             | 6            | 169725091      |             |
|                       | 169725854           | -                      | 403                    | antisense    | novel          |             |
| transcript            | -                   | 45                     | 0                      | 5            | 1              | 0           |
|                       | 5.398942276         | 0                      | 0.579176583            | 0.137881817  | 0              | 0           |
|                       | 0                   |                        |                        |              |                |             |
| ENSG00000120008       | 1121.524015         | 1166.784527            | 982.5062704            |              |                |             |
| 923.5339522           | 734.5401849         | 784.6974858            | 1090.271604            |              |                |             |
| 814.2572076           | 0.421088901         | 0.016173455            | 1                      | WDR11        | 10             |             |
|                       | 120851175           | 120909524              | +                      | 10837        | protein_coding |             |
|                       | WD repeat domain 11 | [Source:HGNC           | Symbol;Acc:HGNC:13831] | -            |                |             |
|                       | 1166                | 1341                   | 1056                   | 838          | 606            | 850         |
|                       | 5.392352845         | 4.548842298            | 4.296818299            | 3.437248341  |                |             |
|                       | 3.647042888         |                        |                        |              |                |             |
| ENSG00000262001       | 134.6598303         | 94.83930906            | 85.5971372             |              |                |             |
| 312.9876401           | 138.1808269         | 175.4029674            | 105.0320922            |              |                |             |
| 208.8571448           | -0.992384054        | 0.016175938            | 1                      | DLGAP1-AS2   |                |             |
|                       | 18                  | 3603000                | 3608336                | +            | 3171           | antisense   |
| antisense RNA 2       | [Source:HGNC        | Symbol;Acc:HGNC:28146] | -                      | 140          |                |             |
|                       | 109                 | 92                     | 284                    | 114          | 190            | 2.134681125 |
| 1.497920808           | 1.354370922         | 4.976616117            | 2.209815266            |              |                |             |
| 2.786046605           |                     |                        |                        |              |                |             |
| ENSG00000285532       | 9.618559309         | 0                      | 26.98170629            | 0            | 0              |             |
|                       | 0                   | 12.20008853            | 0                      | 5.95005148   | 0.016193263    |             |
|                       | 1                   | AC091614.2             | 1                      | 90841587     | 90849472       |             |
|                       | +                   | 754                    | lincRNA                | novel        | transcript     | -           |
|                       | 0                   | 29                     | 0                      | 0            | 0.64125368     | 0           |
|                       | 1.795447406         | 0                      | 0                      | 0            |                |             |
| ENSG00000113240       | 188.5237625         | 261.0256213            | 213.992843             |              |                |             |

|                                                                 |              |             |             |                |             |             |
|-----------------------------------------------------------------|--------------|-------------|-------------|----------------|-------------|-------------|
| 143.2689902                                                     | 133.3323768  | 95.08687181 | 221.1807422 |                |             |             |
| 123.8960796                                                     | 0.838667338  | 0.016195766 | 1           | CLK4           | 5           |             |
| 178602664                                                       | 178630615    | -           | 7924        | protein_coding |             |             |
| CDC like kinase 4 [Source:HGNC Symbol;Acc:HGNC:13659]           |              |             |             |                |             |             |
| 196                                                             | 300          | 230         | 130         | 110            | 103         | 1.195949443 |
| 1.649815523                                                     | 1.354969143  | 0.91161388  |             |                |             | 0.853287883 |
| 0.604399054                                                     |              |             |             |                |             |             |
| ENSG00000161958                                                 | 10.58041524  | 13.92136647 | 4.652018326 |                |             | 0           |
| 0                                                               | 0            | 9.717933345 | 0           | 5.622889254    |             |             |
| 0.016201863                                                     | 1            | FGF11       | 17          | 7438273        | 7444937     | 5565        |
| protein_coding fibroblast growth factor 11 [Source:HGNC         |              |             |             |                |             |             |
| Symbol;Acc:HGNC:3667]                                           |              |             |             |                |             |             |
| 0                                                               | 0.095571573  | 0.125289135 | 0.041942168 | 5              | 0           | 0           |
| 0                                                               | 0            |             |             |                |             |             |
| ENSG00000164096                                                 | 1650.544778  | 2464.081865 | 2146.441256 |                |             |             |
| 1595.796137                                                     | 1597.564296  | 1575.857186 | 2087.022633 |                |             |             |
| 1589.739207                                                     | 0.392899372  | 0.016214553 | 1           | C4orf3         | 4           |             |
| 119296419                                                       | 119304445    | -           | 3148        | protein_coding |             |             |
| chromosome 4 open reading frame 3 [Source:HGNC                  |              |             |             |                |             |             |
| Symbol;Acc:HGNC:19225]                                          |              |             |             |                |             |             |
| 1707                                                            | 26.35625959  | 39.20280326 | 34.21045944 | 2307           | 1448        | 1318        |
| 25.55911911                                                     | 25.73522957  | 25.21330721 |             |                |             |             |
| ENSG00000095380                                                 | 780.06516    | 723.0409709 | 714.5500149 |                |             |             |
| 937.8608513                                                     | 973.3263506  | 1013.644517 | 739.2187153 |                |             |             |
| 974.9439063                                                     | -0.399599671 | 0.016231913 | 1           | NANS           | 9           |             |
| 98056739                                                        | 98083075     | +           | 4922        | protein_coding |             |             |
| N-acetylneuraminatase synthase [Source:HGNC                     |              |             |             |                |             |             |
| Symbol;Acc:HGNC:19237]                                          |              |             |             |                |             |             |
| 1098                                                            | 7.966736651  | 7.357292326 | 7.283928038 | 768            | 851         | 803         |
| 9.60726996                                                      | 10.02816096  | 10.37269836 |             |                |             |             |
| ENSG00000167767                                                 | 428.9877452  | 271.4666461 | 392.6303467 |                |             |             |
| 706.4263286                                                     | 515.1478194  | 466.2026239 | 364.3615793 |                |             |             |
| 562.5922573                                                     | -0.626901885 | 0.016281506 | 1           | KRT80          | 12          |             |
| 52168996                                                        | 52192000     | -           | 4350        | protein_coding |             |             |
| keratin 80 [Source:HGNC Symbol;Acc:HGNC:27056]                  |              |             |             |                |             |             |
| 312                                                             | 422          | 641         | 425         | 505            | 4.957318451 | 446         |
| 3.125531893                                                     | 4.528654928  | 8.188056226 | 6.005470435 |                |             |             |
| 5.39800322                                                      |              |             |             |                |             |             |
| ENSG00000143319                                                 | 2496.977997  | 2666.811764 | 2584.661382 |                |             |             |
| 2923.789469                                                     | 3202.401268  | 3379.73823  | 2582.817048 |                |             |             |
| 3168.642989                                                     | -0.295019077 | 0.016310769 | 0.166758629 |                |             |             |
| ISG20L2 1                                                       | 156721891    | 156728799   | -           | 5262           |             |             |
| protein_coding interferon stimulated exonuclease gene 20 like 2 |              |             |             |                |             |             |
| [Source:HGNC Symbol;Acc:HGNC:25745]                             |              |             |             |                |             |             |
| 2653                                                            | 2642         | 3661        | 23.85366199 | 2596           | 3065        | 2778        |
| 24.64492118                                                     | 28.01550465  | 30.86237399 | 32.3504185  |                |             |             |
| ENSG00000153214                                                 | 431.873313   | 462.8854351 | 482.8795022 |                |             |             |
| 358.1724755                                                     | 293.3312289  | 278.7984008 | 459.2127501 |                |             |             |
| 310.1007018                                                     | 0.566957185  | 0.016333489 | 1           | TMEM87B        | 2           |             |
| 112055223                                                       | 112119318    | +           | 5367        | protein_coding |             |             |

|                                                       |                                                               |             |                                     |                              |             |                |
|-------------------------------------------------------|---------------------------------------------------------------|-------------|-------------------------------------|------------------------------|-------------|----------------|
|                                                       | transmembrane protein 87B [Source:HGNC Symbol;Acc:HGNC:25913] |             |                                     |                              |             |                |
| -                                                     | 449                                                           | 532         | 519                                 | 325                          | 242         | 302            |
| 4.044976121                                           | 4.319551286                                                   |             | 4.514210415                         |                              | 3.364835283 |                |
| 2.77160369                                            | 2.616413407                                                   |             |                                     |                              |             |                |
| ENSG00000121644                                       | 2476.779022                                                   |             | 2759.040817                         |                              | 2514.881107 |                |
| 3138.692955                                           | 3299.370269                                                   |             | 3047.395766                         |                              | 2583.566982 |                |
| 3161.819663                                           | -0.291134241                                                  |             | 0.016348885                         |                              | 0.166758629 | DESI2          |
| 1                                                     | 244652935                                                     |             | 244709033                           |                              | + 5104      |                |
| protein_coding                                        | desumoylating isopeptidase 2 [Source:HGNC                     |             |                                     |                              |             |                |
| Symbol;Acc:HGNC:24264]                                | -                                                             |             | 2575                                | 3171                         | 2703        | 2848 2722      |
| 3301                                                  | 24.39314426                                                   |             | 27.07348567                         |                              | 24.72187555 |                |
| 31.00568731                                           | 32.78119758                                                   |             | 30.07224679                         |                              |             |                |
| ENSG00000180596                                       | 35.58866945                                                   |             | 2.610256213                         |                              | 0 0 0       |                |
| 0                                                     | 12.73297522                                                   |             | 0                                   | 6.011232644                  |             | 0.016406076    |
| 1                                                     | HIST1H2BC                                                     |             | 6                                   | 26114873                     |             | 26123926       |
| -                                                     | 834                                                           |             | protein_coding                      | histone cluster 1 H2B family |             |                |
| member c [Source:HGNC Symbol;Acc:HGNC:4757]           | -                                                             |             |                                     | 37                           |             | 3              |
| 0                                                     | 0                                                             | 0           | 0                                   | 2.145047383                  |             | 0.156752257    |
| 0                                                     | 0                                                             | 0           | 0                                   |                              |             |                |
| ENSG00000218980                                       | 35.58866945                                                   |             | 2.610256213                         |                              | 0 0 0       |                |
| 0                                                     | 12.73297522                                                   |             | 0                                   | 6.011232644                  |             | 0.016406076    |
| 1                                                     | FTH1P15 6                                                     |             | 57004520                            |                              | 57004799    | +              |
| 280                                                   | processed_pseudogene ferritin heavy chain 1                   |             |                                     |                              |             |                |
| pseudogene 15 [Source:HGNC Symbol;Acc:HGNC:3985]      | -                                                             |             |                                     |                              |             | 37             |
| 3                                                     | 0                                                             | 0           | 0                                   | 0                            | 6.389176847 |                |
| 0.466897793                                           | 0                                                             | 0           | 0                                   | 0                            |             |                |
| ENSG00000196243                                       | 13.46598303                                                   |             | 14.79145187                         |                              | 1.86080733  | 0              |
| 0                                                     | 0                                                             | 10.03941408 | 0                                   |                              | 5.669734217 |                |
| 0.016419749                                           | 1                                                             | LINC00615   | 12                                  |                              | 90918023    |                |
| 90948669                                              | +                                                             | 1406        | lincRNA long intergenic non-protein |                              |             |                |
| coding RNA 615 [Source:HGNC Symbol;Acc:HGNC:26343]    | -                                                             |             |                                     |                              |             | 14             |
| 17                                                    | 2                                                             | 0           | 0                                   | 0                            | 0.481441952 |                |
| 0.52689272                                            | 0.06640346                                                    |             | 0                                   | 0                            |             |                |
| ENSG00000125968                                       | 1609.184972                                                   |             | 2118.657959                         |                              | 2031.071201 |                |
| 1812.903761                                           | 2705.435136                                                   |             | 3572.681494                         |                              | 1919.638044 |                |
| 2697.006797                                           | -0.49077332                                                   |             | 0.016425023                         |                              | 1           | ID1 20         |
| 31605283                                              |                                                               | 31606515    | +                                   |                              | 1233        | protein_coding |
| "inhibitor of DNA binding 1, HLH protein [Source:HGNC |                                                               |             |                                     |                              |             |                |
| Symbol;Acc:HGNC:5360]"                                | bHLH                                                          |             | 1673                                | 2435                         | 2183        | 1645 2232      |
| 3870                                                  | 65.60456812                                                   |             | 86.05864161                         |                              | 82.64882714 |                |
| 74.13356227                                           | 111.2700989                                                   |             | 145.9415339                         |                              |             |                |
| ENSG00000143669                                       | 846.4332192                                                   |             | 833.5418173                         |                              | 692.2203269 |                |
| 672.2621848                                           | 550.2990824                                                   |             | 432.9683775                         |                              | 790.7317878 |                |
| 551.8432149                                           | 0.519929948                                                   |             | 0.016427298                         |                              | 1           | LYST 1         |
| 235661041                                             |                                                               | 235883640   | -                                   |                              | 19614       | protein_coding |
| lysosomal trafficking regulator [Source:HGNC          |                                                               |             |                                     |                              |             |                |
| Symbol;Acc:HGNC:1968]                                 | -                                                             |             | 880                                 | 958                          | 744         | 610 454        |
| 469                                                   | 2.169290517                                                   |             | 2.128422963                         |                              | 1.770731856 |                |
| 1.728127207                                           | 1.422777675                                                   |             | 1.111828212                         |                              |             |                |
| ENSG00000127564                                       | 325.1073047                                                   |             | 498.5589366                         |                              | 521.9564562 |                |

|                                                  |                                           |                |                    |                |              |      |
|--------------------------------------------------|-------------------------------------------|----------------|--------------------|----------------|--------------|------|
| 814.4291059                                      | 684.8435717                               | 537.2869844    | 448.5408992        |                |              |      |
| 678.8532207                                      | -0.596879186                              | 0.016447665    | 1                  | PKMYT1         | 16           |      |
| 2968024                                          | 2980539                                   | -              | 5034               | protein_coding | "protein     |      |
| kinase, membrane associated tyrosine/threonine 1 |                                           |                |                    |                | [Source:HGNC |      |
| Symbol;Acc:HGNC:29650]"                          | -                                         | 338            | 573                | 561            | 739          | 565  |
| 582                                              | 3.246420002                               | 4.960209371    | 5.202303509        |                |              |      |
| 8.157240576                                      | 6.898943636                               | 5.375771389    |                    |                |              |      |
| ENSG00000141371                                  | 21.16083048                               | 14.79145187    | 0                  | 0              | 0            |      |
| 0                                                | 11.98409412                               | 0              | 5.924779547        | 0.016471099    |              |      |
| 1                                                | C17orf64                                  | 17             | 60392429           | 60431421       |              |      |
| +                                                | 1184                                      | protein_coding | chromosome 17      | open reading   |              |      |
| frame 64                                         | [Source:HGNC Symbol;Acc:HGNC:26990]       | -              | 22                 | 17             |              |      |
| 0                                                | 0                                         | 0              | 0                  | 0.898405072    | 0.625685106  |      |
| 0                                                | 0                                         | 0              | 0                  |                |              |      |
| ENSG00000184613                                  | 9.618559309                               | 14.79145187    | 4.652018326        | 0              |              |      |
| 0                                                | 0                                         | 9.687343169    | 0                  | 5.618483712    |              |      |
| 0.016486685                                      | 1                                         | NELL2          | 12                 | 44508275       | 44921848     |      |
| -                                                | 6424                                      | protein_coding | neural EGFL like 2 |                |              |      |
| [Source:HGNC Symbol;Acc:HGNC:7751]               | -                                         | 10             | 17                 | 5              |              |      |
| 0                                                | 0                                         | 0              | 0.075265454        | 0.115319297    |              |      |
| 0.036333774                                      | 0                                         | 0              | 0                  |                |              |      |
| ENSG00000141627                                  | 1012.834295                               | 1201.587943    | 930.4036652        |                |              |      |
| 1507.630605                                      | 1313.929968                               | 1317.368603    | 1048.275301        |                |              |      |
| 1379.643058                                      | -0.395995803                              | 0.016554046    | 1                  | DYM            | 18           |      |
| 49041474                                         | 49461347                                  | -              | 7256               | protein_coding |              |      |
| dymeclin                                         | [Source:HGNC Symbol;Acc:HGNC:21317]       | -              | 1053               |                |              |      |
| 1381                                             | 1000                                      | 1368           | 1084               | 1427           | 7.016690387  |      |
| 8.293827574                                      | 6.433521576                               | 10.47612971    | 9.182889711        |                |              |      |
| 9.144452686                                      |                                           |                |                    |                |              |      |
| ENSG00000279652                                  | 25.97011014                               | 25.23247672    | 22.32968796        | 0              |              |      |
| 0                                                | 6.462214589                               | 24.51075827    | 2.15407153         |                |              |      |
| 3.450045219                                      | 0.016616645                               | 1              | Z82217.1           | 22             |              |      |
| 35992321                                         | 36000469                                  | +              | 8149               | lincRNA novel  |              |      |
| transcript                                       | -                                         | 27             | 29                 | 24             | 0            | 7    |
| 0.160199318                                      | 0.155078745                               | 0.137484253    | 0                  | 0              | 0            |      |
| 0.039941534                                      |                                           |                |                    |                |              |      |
| ENSG00000202566                                  | 14.42783896                               | 15.66153728    | 0.930403665        | 0              |              |      |
| 0                                                | 0                                         | 10.33992664    | 0                  | 5.712281203    |              |      |
| 0.016624258                                      | 1                                         | MIR421         | X                  | 74218377       | 74218461     |      |
| -                                                | 85                                        | mirNA          | microRNA 421       | [Source:HGNC   |              |      |
| Symbol;Acc:HGNC:32793]                           | -                                         | 15             | 18                 | 1              | 0            | 0    |
| 0                                                | 8.532446028                               | 9.228097557    | 0.549195677        | 0              | 0            |      |
| 0                                                | 0                                         |                |                    |                |              |      |
| ENSG00000141076                                  | 4737.14046                                | 4561.857774    | 4649.227115        |                |              |      |
| 5305.360914                                      | 6038.744556                               | 5419.951693    | 4649.40845         |                |              |      |
| 5588.019055                                      | -0.265171421                              | 0.016683527    | 0.168606066        | UTP4           |              |      |
| 16                                               | 69131291                                  | 69231130       | +                  | 5681           |              |      |
| protein_coding                                   | "UTP4, small subunit processome component | [Source:HGNC   |                    |                |              |      |
| Symbol;Acc:HGNC:1983]"                           | -                                         | 4925           | 5243               | 4997           | 4814         | 4982 |
| 5871                                             | 41.91627317                               | 40.21736996    | 41.06110155        |                |              |      |

|                                                    |                            |                        |                          |                    |                |             |      |      |
|----------------------------------------------------|----------------------------|------------------------|--------------------------|--------------------|----------------|-------------|------|------|
| 47.08616719                                        | 53.90465789                | 48.0527569             |                          |                    |                |             |      |      |
| ENSG00000102225                                    | 1128.257007                | 1376.47511             | 1247.671315              |                    |                |             |      |      |
| 1549.509233                                        | 1638.776122                | 1611.860953            | 1250.801144              |                    |                |             |      |      |
| 1600.048769                                        | -0.355017165               | 0.016687317            | 1                        | CDK16              | X              |             |      |      |
| 47217860                                           | 47229997                   | +                      | 6524                     | protein_coding     |                |             |      |      |
|                                                    | cyclin dependent kinase 16 | [Source:HGNC           | Symbol;Acc:HGNC:8749]    |                    |                |             |      |      |
| -                                                  | 1173                       | 1582                   | 1341                     | 1406               | 1352           | 1746        |      |      |
| 8.693312193                                        | 10.56698582                | 9.595350898            | 11.97521755              |                    |                |             |      |      |
| 12.73825972                                        | 12.44403733                |                        |                          |                    |                |             |      |      |
| ENSG00000245556                                    | 138.5072541                | 174.0170808            | 168.4030634              |                    |                |             |      |      |
| 102.4924315                                        | 67.87830091                | 78.46974858            | 160.3091328              |                    |                |             |      |      |
| 82.94682698                                        | 0.950366143                | 0.016710874            | 1                        | SCAMP1-AS1         |                |             |      |      |
| 5                                                  | 78342365                   | 78360507               | -                        | 1792               |                |             |      |      |
| lincRNA SCAMP1 antisense RNA 1                     | [Source:HGNC               | Symbol;Acc:HGNC:50544] |                          |                    |                |             |      |      |
| -                                                  | 144                        | 200                    | 181                      | 93                 | 56             | 85          |      |      |
| 3.885310245                                        | 4.863518678                | 4.715053288            | 2.883745879              |                    |                |             |      |      |
| 1.920867382                                        | 2.205524764                |                        |                          |                    |                |             |      |      |
| ENSG00000136240                                    | 5470.074679                | 5727.772216            | 5386.106818              |                    |                |             |      |      |
| 7427.946108                                        | 6399.954086                | 6228.65169             | 5527.984571              |                    |                |             |      |      |
| 6685.517295                                        | -0.274205107               | 0.016713673            | 0.168606066              | KDELR2             |                |             |      |      |
| 7                                                  | 6445953                    | 6484242                | -                        | 3990               | protein_coding | KDEL        |      |      |
| endoplasmic reticulum protein retention receptor 2 | [Source:HGNC               | Symbol;Acc:HGNC:6305]  | -                        | 5687               | 6583           | 5789        | 6740 | 5280 |
| 6747                                               | 68.91464908                | 71.89679934            | 67.72931601              |                    |                |             |      |      |
| 93.86399715                                        | 81.34079019                | 78.62647987            |                          |                    |                |             |      |      |
| ENSG00000236234                                    | 8.656703379                | 6.960683234            | 13.02565131              | 0                  |                |             |      |      |
| 0                                                  | 0                          | 9.547679308            | 0                        | 5.5967777          |                |             |      |      |
| 0.016760165                                        | 1                          | AC091132.2             | 17                       | 45452844           |                |             |      |      |
| 45464065                                           | +                          | 769                    | antisense                | "novel transcript, |                |             |      |      |
| antisense to PLEKHM1"                              | -                          | 9                      | 8                        | 14                 | 0              | 0           |      |      |
| 0                                                  | 0.565870933                | 0.453338126            | 0.849860671              | 0                  |                |             |      |      |
| 0                                                  | 0                          |                        |                          |                    |                |             |      |      |
| ENSG00000257093                                    | 866.6321938                | 588.1777333            | 614.066419               |                    |                |             |      |      |
| 488.2166359                                        | 501.8145818                | 444.0464596            | 689.6254487              |                    |                |             |      |      |
| 478.0258924                                        | 0.528898374                | 0.016788098            | 1                        | KIAA1147           |                |             |      |      |
| 7                                                  | 141656728                  | 141702153              | -                        | 7356               |                |             |      |      |
| protein_coding KIAA1147                            | [Source:HGNC               | Symbol;Acc:HGNC:29472] | -                        |                    |                |             |      |      |
| 901                                                | 676                        | 660                    | 443                      | 414                | 481            | 5.922216595 |      |      |
| 4.00464085                                         | 4.188400963                | 3.346370702            | 3.459441419              |                    |                |             |      |      |
| 3.040425553                                        |                            |                        |                          |                    |                |             |      |      |
| ENSG00000165646                                    | 4.809279655                | 14.79145187            | 9.304036652              | 0                  |                |             |      |      |
| 0                                                  | 0                          | 9.634922726            | 0                        | 5.610921069        |                |             |      |      |
| 0.016788671                                        | 1                          | SLC18A2 10             | 117241073                | 117279430          |                |             |      |      |
| +                                                  | 4145                       | protein_coding         | solute carrier family 18 |                    |                |             |      |      |
| member A2                                          | [Source:HGNC               | Symbol;Acc:HGNC:10935] | -                        | 5                  | 17             |             |      |      |
| 10                                                 | 0                          | 0                      | 0                        | 0.058323917        | 0.178724045    |             |      |      |
| 0.11262155                                         | 0                          | 0                      | 0                        |                    |                |             |      |      |
| ENSG00000049759                                    | 1154.227117                | 1102.398207            | 1023.444032              |                    |                |             |      |      |
| 1459.139562                                        | 1283.627155                | 1480.770314            | 1093.356452              |                    |                |             |      |      |
| 1407.845677                                        | -0.3651439                 | 0.016835525            | 1                        | NEDD4L             | 18             |             |      |      |

|                                                                                                                                          |                                              |             |             |                |        |
|------------------------------------------------------------------------------------------------------------------------------------------|----------------------------------------------|-------------|-------------|----------------|--------|
| 58044367                                                                                                                                 | 58401540                                     | +           | 17455       | protein_coding |        |
| "neural precursor cell expressed, developmentally down-regulated 4-like, E3 ubiquitin protein ligase [Source:HGNC Symbol;Acc:HGNC:7728]" |                                              |             |             |                |        |
| -                                                                                                                                        | 1200                                         | 1267        | 1100        | 1324           | 1059   |
| 1604                                                                                                                                     | 3.324012202                                  | 3.163117752 | 2.941838775 |                |        |
| 4.214831097                                                                                                                              | 3.729266906                                  | 4.272829161 |             |                |        |
| ENSG00000188157                                                                                                                          | 1981.423218                                  | 1633.150304 | 2253.437677 |                |        |
| 1515.345089                                                                                                                              | 1666.65471                                   | 1253.66963  | 1956.003733 |                |        |
| 1478.556476                                                                                                                              | 0.404242308                                  | 0.016846752 | 1           | AGRN           | 1      |
| 1020123                                                                                                                                  | 1056118                                      | +           | 10758       | protein_coding | agrin  |
| [Source:HGNC Symbol;Acc:HGNC:329]                                                                                                        |                                              |             |             |                |        |
| -                                                                                                                                        |                                              |             | 2060        | 1877           | 2422   |
| 1375                                                                                                                                     | 1375                                         | 1358        | 9.258420397 | 7.603110991    |        |
| 10.50965923                                                                                                                              | 7.102041437                                  | 7.85630831  | 5.869474878 |                |        |
| ENSG00000104695                                                                                                                          | 2276.712989                                  | 2695.524582 | 2245.064044 |                |        |
| 2857.66532                                                                                                                               | 3002.402703                                  | 3100.016656 | 2405.767205 |                |        |
| 2986.694893                                                                                                                              | -0.311989061                                 | 0.016853378 | 0.168766452 |                | PPP2CB |
| 8                                                                                                                                        | 30774457                                     | 30814314    | -           | 4516           |        |
| protein_coding                                                                                                                           | protein phosphatase 2 catalytic subunit beta |             |             |                |        |
| [Source:HGNC Symbol;Acc:HGNC:9300]                                                                                                       |                                              |             |             |                |        |
| -                                                                                                                                        |                                              |             | 2367        | 3098           | 2413   |
| 2593                                                                                                                                     | 2477                                         | 3358        | 25.34227161 | 29.89414095    |        |
| 24.94304237                                                                                                                              | 31.90513798                                  | 33.7147104  | 34.57464875 |                |        |
| ENSG00000169981                                                                                                                          | 351.0774148                                  | 481.1572285 | 392.6303467 |                |        |
| 555.4428543                                                                                                                              | 690.9041343                                  | 540.0565049 | 408.28833   |                |        |
| 595.4678312                                                                                                                              | -0.543210972                                 | 0.016897351 | 1           | ZNF35          | 3      |
| 44648727                                                                                                                                 | 44660791                                     | +           | 2663        | protein_coding |        |
| zinc finger protein 35 [Source:HGNC Symbol;Acc:HGNC:13099]                                                                               |                                              |             |             |                |        |
| zf-C2H2                                                                                                                                  | 365                                          | 553         | 422         | 504            | 570    |
| 570                                                                                                                                      | 585                                          |             |             |                |        |
| 6.6270907                                                                                                                                | 9.049249503                                  | 7.397539969 | 10.51650454 |                |        |
| 13.15682352                                                                                                                              | 10.21446719                                  |             |             |                |        |
| ENSG00000084207                                                                                                                          | 4542.845562                                  | 4974.278256 | 5589.86522  |                |        |
| 6093.34036                                                                                                                               | 6568.437726                                  | 5790.144272 | 5035.663013 |                |        |
| 6150.640786                                                                                                                              | -0.288400061                                 | 0.016913414 | 0.168766452 |                | GSTP1  |
| 11                                                                                                                                       | 67583595                                     | 67586656    | +           | 1911           |        |
| protein_coding                                                                                                                           | glutathione S-transferase pi 1               |             |             |                |        |
| [Source:HGNC Symbol;Acc:HGNC:4638]                                                                                                       |                                              |             |             |                |        |
| -                                                                                                                                        |                                              | 4723        | 5717        | 6008           | 5529   |
| 6272                                                                                                                                     | 119.4974052                                  | 130.3665291 | 146.762558  |                | 5419   |
| 160.7673846                                                                                                                              | 174.3033862                                  | 152.6076767 |             |                |        |
| ENSG00000180611                                                                                                                          | 126.9649829                                  | 195.769216  | 120.0220728 |                |        |
| 185.1476181                                                                                                                              | 306.6644666                                  | 301.8777387 | 147.5854239 |                |        |
| 264.5632745                                                                                                                              | -0.841360592                                 | 0.017039866 | 1           | MB21D2         | 3      |
| 192796815                                                                                                                                | 192918161                                    | -           | 3368        | protein_coding |        |
| Mab-21 domain containing 2 [Source:HGNC Symbol;Acc:HGNC:30438]                                                                           |                                              |             |             |                |        |
| -                                                                                                                                        | 132                                          | 225         | 129         | 168            | 253    |
| 253                                                                                                                                      | 327                                          |             |             |                |        |
| 1.894973168                                                                                                                              | 2.911179826                                  | 1.787984145 | 2.771719279 |                |        |
| 4.617381925                                                                                                                              | 4.514469133                                  |             |             |                |        |
| ENSG00000267278                                                                                                                          | 25.97011014                                  | 6.09059783  | 41.86816493 |                | 0      |
| 6.060562582                                                                                                                              | 0                                            | 24.64295763 | 2.020187527 |                |        |
| 3.658874238                                                                                                                              | 0.017040108                                  | 1           | MAP3K14-AS1 | 17             |        |
| 45247925                                                                                                                                 | 45268630                                     | +           | 3775        | antisense      |        |
| MAP3K14 antisense RNA 1 [Source:HGNC Symbol;Acc:HGNC:44359]                                                                              |                                              |             |             |                |        |
|                                                                                                                                          |                                              |             |             |                | -      |







|                        |                                                                |             |             |             |                |
|------------------------|----------------------------------------------------------------|-------------|-------------|-------------|----------------|
|                        | 2.560133374                                                    | 2.99718413  | 2.664061277 | 1.734664963 |                |
|                        | 1.873174379                                                    |             |             |             |                |
| ENSG00000179071        | 139.46911                                                      | 95.70939447 | 117.2308618 |             |                |
| 28.65379804            | 54.54506323                                                    | 69.23801345 | 117.4697888 |             |                |
| 50.81229158            | 1.205807034                                                    | 0.017411605 | 1           | CCDC89      | 11             |
|                        | 85684866                                                       | 85686277    | -           | 1412        | protein_coding |
|                        | coiled-coil domain containing 89 [Source:HGNC                  |             |             |             |                |
| Symbol;Acc:HGNC:26762] | -                                                              | 145         | 110         | 126         | 26 45          |
|                        | 75                                                             | 4.965174565 | 3.394818703 | 4.165641432 |                |
| 1.023176825            | 1.958958236                                                    | 2.469776107 |             |             |                |
| ENSG00000162458        | 1074.393075                                                    | 997.1178733 | 858.762583  |             |                |
| 678.8745997            | 856.963549                                                     | 562.2126693 | 976.7578437 |             |                |
| 699.3502727            | 0.483325906                                                    | 0.017412902 | 1           | FBLIM1      | 1              |
|                        | 15756607                                                       | 15786594    | +           | 4716        | protein_coding |
|                        | filamin binding LIM protein 1 [Source:HGNC                     |             |             |             |                |
| Symbol;Acc:HGNC:24686] | -                                                              | 1117        | 1146        | 923         | 616 707        |
|                        | 609                                                            | 11.45198032 | 10.58935283 | 9.136375498 |                |
| 7.25803335             | 9.214949883                                                    | 6.004467719 |             |             |                |
| ENSG00000141576        | 352.0392707                                                    | 274.9469877 | 263.3042372 |             |                |
| 370.2952362            | 442.4210685                                                    | 554.8272812 | 296.7634986 |             |                |
| 455.8478619            | -0.620491257                                                   | 0.01742243  | 1           | RNF157      | 17             |
|                        | 76142453                                                       | 76240373    | -           | 7805        | protein_coding |
|                        | ring finger protein 157 [Source:HGNC Symbol;Acc:HGNC:29402]    |             |             |             |                |
|                        | -                                                              | 366         | 316         | 283         | 336 365 601    |
| 2.267302122            | 1.764301377                                                    | 1.692620373 | 2.392094947 |             |                |
| 2.874533122            | 3.580408527                                                    |             |             |             |                |
| ENSG00000148719        | 933.9621089                                                    | 1043.2324   | 1146.257316 |             |                |
| 1265.17539             | 1253.324342                                                    | 1628.478076 | 1041.150608 |             |                |
| 1382.325936            | -0.409534237                                                   | 0.017493347 | 1           | DNAJB12     | 10             |
|                        | 72332830                                                       | 72355230    | -           | 5649        | protein_coding |
|                        | DnaJ heat shock protein family (Hsp40) member B12 [Source:HGNC |             |             |             |                |
| Symbol;Acc:HGNC:14891] | -                                                              | 971         | 1199        | 1232        | 1148 1034      |
|                        | 1764                                                           | 8.310915595 | 9.249243352 | 10.18087649 |                |
| 11.29229869            | 11.2511347                                                     | 14.51971274 |             |             |                |
| ENSG00000143774        | 4199.462995                                                    | 4972.538085 | 4847.403096 |             |                |
| 4666.160804            | 6395.105636                                                    | 6825.944953 | 4673.134725 |             |                |
| 5962.403798            | -0.351549485                                                   | 0.017551704 | 0.170965309 | GUK1        |                |
|                        | 1                                                              | 228139962   | 228148984   | +           | 4725           |
| protein_coding         | guanylate kinase 1 [Source:HGNC Symbol;Acc:HGNC:4693]          |             |             |             |                |
|                        | -                                                              | 4366        | 5715        | 5210        | 4234 5276 7394 |
| 44.67691069            | 52.70757309                                                    | 51.47329219 | 49.79217352 |             |                |
| 68.63574218            | 72.76267411                                                    |             |             |             |                |
| ENSG00000101294        | 3533.85869                                                     | 2649.410056 | 3187.562957 |             |                |
| 3758.05582             | 4295.726758                                                    | 3722.235603 | 3123.610568 |             |                |
| 3925.339394            | -0.329576858                                                   | 0.017667251 | 0.170965309 | HM13        |                |
|                        | 20                                                             | 31514410    | 31577923    | +           | 10805          |
| protein_coding         | histocompatibility minor 13 [Source:HGNC                       |             |             |             |                |
| Symbol;Acc:HGNC:16435] | -                                                              | 3674        | 3045        | 3426        | 3410 3544      |
|                        | 4032                                                           | 16.4405218  | 12.28064348 | 14.80159862 |                |
| 17.53644879            | 20.16119649                                                    | 17.35109031 |             |             |                |

|                         |                 |                        |                 |                    |             |             |
|-------------------------|-----------------|------------------------|-----------------|--------------------|-------------|-------------|
| ENSG00000225630         | 4342.779528     | 3375.931368            | 3326.193103     |                    |             |             |
| 3861.650321             | 5301.780146     | 5040.52738             | 3681.634667     |                    |             |             |
| 4734.652615             | -0.362985146    | 0.017692488            | 0.170965309     |                    |             |             |
| MTND2P28                | 1               | 629640                 | 630683          | +                  | 1044        |             |
| unprocessed_pseudogene  | MT-ND2          | pseudogene             | 28              | [Source:HGNC       |             |             |
| Symbol;Acc:HGNC:42129]  | -               | 4515                   | 3880            | 3575               | 3504        | 4374        |
| 5460                    | 209.1021376     | 161.9533086            | 159.8532916     |                    |             |             |
| 186.4986285             | 257.5287028     | 243.1773728            |                 |                    |             |             |
| ENSG00000051341         | 345.3062792     | 254.064938             | 328.4324938     |                    |             |             |
| 636.9959718             | 519.9962695     | 325.88025              | 309.2679037     |                    |             |             |
| 494.2908304             | -0.675763129    | 0.017715783            | 1               | POLQ               | 3           |             |
| 121431427               | 121546641       | -                      | 9400            | protein_coding     |             |             |
| DNA polymerase theta    | [Source:HGNC    | Symbol;Acc:HGNC:9186]  | -               |                    |             |             |
| 359                     | 292             | 353                    | 578             | 429                | 353         | 1.846578656 |
| 1.353672467             | 1.753044286     | 3.416740759            | 2.805283768     |                    |             |             |
| 1.746135211             |                 |                        |                 |                    |             |             |
| ENSG00000140632         | 1206.167337     | 857.0341232            | 1211.385572     |                    |             |             |
| 837.5725581             | 850.9029864     | 690.5337875            | 1091.529011     |                    |             |             |
| 793.0031107             | 0.461374757     | 0.01771945             | 1               | GLYR1              | 16          |             |
| 4803203                 | 4847342         | -                      | 5470            | protein_coding     | glyoxylate  |             |
| reductase 1 homolog     | [Source:HGNC    | Symbol;Acc:HGNC:24434] | -               |                    |             | 1254        |
| 985                     | 1302            | 760                    | 702             | 748                | 11.08438053 |             |
| 7.847069551             | 11.11142332     | 7.720373469            | 7.888549336     |                    |             |             |
| 6.358362582             |                 |                        |                 |                    |             |             |
| ENSG00000262370         | 12.5041271      | 11.31111026            | 4.652018326     |                    |             | 0           |
| 0                       | 0               | 9.489085228            | 0               | 5.588149063        |             |             |
| 0.017722214             | 1               | AC108134.3             | 16              | 3076911            | 3087100     | -           |
| 1326                    | lincRNA         | uncharacterized        | LOC105371058    | [Source:NCBI       |             |             |
| gene;Acc:105371058]     | -               | 13                     | 13              | 5                  | 0           | 0           |
| 0                       | 0.474024779     | 0.427226739            | 0.176024255     | 0                  |             |             |
| 0                       | 0               |                        |                 |                    |             |             |
| ENSG00000227001         | 60.59692365     | 65.25640532            | 58.61543091     |                    |             |             |
| 35.26621297             | 9.69690013      | 7.385388102            | 61.48958662     |                    |             |             |
| 17.4495004              | 1.820752114     | 0.017727359            | 1               | NBPF2P             | 1           |             |
| 21424625                | 21427967        | -                      | 661             |                    |             |             |
| unprocessed_pseudogene  | "NBPF member 2, | pseudogene             | [Source:HGNC    |                    |             |             |
| Symbol;Acc:HGNC:31987]" | -               | 63                     | 75              | 63                 | 32          | 8           |
| 8                       | 4.608295359     | 4.944454692            | 4.449232755     |                    |             |             |
| 2.690051302             | 0.743936535     | 0.562755238            |                 |                    |             |             |
| ENSG00000204709         | 25.0082542      | 10.44102485            | 0               | 0                  | 0           |             |
| 0                       | 11.81642635     | 0                      | 5.904079284     | 0.01774878         |             |             |
| 1                       | LINC01556       | 6                      | 28943877        | 28944537           |             |             |
| +                       | 466             | lincRNA                | long intergenic | non-protein coding | RNA         |             |
| 1556                    | [Source:HGNC    | Symbol;Acc:HGNC:21195] | -               | 26                 | 12          |             |
| 0                       | 0               | 0                      | 0               | 2.697668916        | 1.122157786 |             |
| 0                       | 0               | 0                      | 0               |                    |             |             |
| ENSG00000100997         | 770.4466007     | 677.7965299            | 657.7953913     |                    |             |             |
| 911.4111915             | 1069.083239     | 857.6281933            | 702.0128406     |                    |             |             |
| 946.0408747             | -0.429885013    | 0.017768698            | 1               | ABHD12             | 20          |             |
| 25294743                | 25390983        | -                      | 3429            | protein_coding     |             |             |

abhydrolase domain containing 12 [Source:HGNC  
Symbol;Acc:HGNC:15868] - 801 779 707 827 882  
929 11.29448018 9.899848996 9.624938529  
13.40139685 15.81060396 12.59735149  
ENSG00000203279 27.893822 7.830768638 0 0 0  
0 11.90819688 0 5.915008736 0.017800842  
1 AL590705.1 9 97200475 97238700  
- 806 lincRNA novel transcript - 29  
9 0 0 0 0 1.739659178  
0.486593233 0 0 0 0  
ENSG00000135898 16.35155083 8.700854042 3.721614661 0  
0 9.591339843 0 5.603133132  
0.017821356 1 GPR55 2 230907318 230961066  
- 4130 protein\_coding G protein-coupled receptor 55  
[Source:HGNC Symbol;Acc:HGNC:4511] - 17 10 4  
0 0 0 0.199021542 0.105513626  
0.045212235 0 0 0  
ENSG00000067064 909.9157107 1058.893937 944.3597202  
1431.587833 1292.111942 1113.347256 971.0564559  
1279.015677 -0.396770615 0.017912084 1 IDI1 10  
1039152 1049170 - 4345 protein\_coding isopentenyl-  
diphosphate delta isomerase 1 [Source:HGNC Symbol;Acc:HGNC:5387]  
- 946 1217 1015 1299 1066 1206  
10.52695029 12.20560736 10.90491531 16.61236306  
15.08046677 12.90590741  
ENSG00000279759 163.5155083 111.3709317 194.454366  
98.08415483 47.27238814 79.39292209 156.4469353  
74.91648835 1.059713529 0.017922826 1 AC118344.2  
19 40355842 40360606 + 4765 TEC  
TEC - 170 128 209 89 39 86  
1.724992586 1.170592298 2.047525961 1.037860887  
0.503093912 0.839202105  
ENSG00000280432 31.74124572 0 4.652018326 0 0  
0 12.13108802 0 5.941250488 0.017996032  
1 AP000962.2 21 16525919 16527019  
+ 1101 TEC TEC - 33 0 5  
0 0 0 1.449198372 0 0.211996515  
0 0 0  
ENSG00000225916 10.58041524 2.610256213 15.81686231 0  
0 9.66917792 0 5.614492187  
0.01800214 1 AC007879.2 2 207226949  
207228308 + 551 lincRNA novel transcript -  
11 3 17 0 0 0 0.96525554  
0.237262036 1.440268155 0 0 0  
ENSG00000131153 1712.103557 1884.604986 1727.759606  
2468.634908 2048.470153 2162.072367 1774.822716  
2226.392476 -0.326993784 0.018032061 1 GINS2 16  
85676198 85690073 - 3264 protein\_coding  
GINS complex subunit 2 [Source:HGNC Symbol;Acc:HGNC:24575]  
- 1780 2166 1857 2240 1690 2342

|                                      |                                                   |               |              |                      |              |
|--------------------------------------|---------------------------------------------------|---------------|--------------|----------------------|--------------|
| 26.36762835                          | 28.91790988                                       | 26.5587597    | 38.13378484  |                      |              |
| 31.82613603                          | 33.3632046                                        |               |              |                      |              |
| ENSG00000228000                      | 8.656703379                                       | 23.49230591   | 22.32968796  | 0                    |              |
|                                      | 3.636337549                                       | 0             | 18.15956575  | 1.212112516          |              |
| 3.973638965                          | 0.018053825                                       | 1             | RPL7AP65     | 17                   |              |
| 18311904                             | 18312651                                          | +             | 748          | processed_pseudogene |              |
|                                      | ribosomal protein L7a                             | pseudogene 65 | [Source:HGNC |                      |              |
| Symbol;Acc:HGNC:37031]               | -                                                 | 9             | 27           | 24                   | 0            |
| 0                                    | 0.581757684                                       | 1.572971175   | 1.497806392  | 0                    | 3            |
| 0.246528434                          | 0                                                 |               |              |                      |              |
| ENSG00000166073                      | 2460.427471                                       | 2725.107486   | 2974.500518  |                      |              |
| 3140.897093                          | 3512.702072                                       | 3411.12613    | 2720.011825  |                      |              |
| 3354.908432                          | -0.302587902                                      | 0.018055295   | 0.173557704  | GPR176               |              |
| 15                                   | 39799032                                          | 39920892      | -            | 5119                 |              |
| protein_coding                       | G protein-coupled receptor 176                    | [Source:HGNC  |              |                      |              |
| Symbol;Acc:HGNC:32370]               | -                                                 | 2558          | 3132         | 3197                 | 2850         |
| 3695                                 | 24.16109579                                       | 26.66215333   | 29.15436204  | 2898                 |              |
| 30.93654245                          | 34.79850704                                       | 33.56296587   |              |                      |              |
| ENSG00000130377                      | 0.961855931                                       | 0             | 2.791210996  | 50.69518115          |              |
|                                      | 15.75746271                                       | 0             | 1.251022309  |                      |              |
| 22.15088129                          | -4.152590233                                      | 0.018179657   | 1            | ACSBG2               | 19           |
| 6135247                              | 6193094                                           | +             | 3447         | protein_coding       | acyl-CoA     |
| synthetase bubblegum family member 2 | [Source:HGNC                                      |               |              |                      |              |
| Symbol;Acc:HGNC:24174]               | -                                                 | 1             | 0            | 3                    | 46           |
| 0                                    | 0.014026843                                       | 0             | 0.040628053  | 0.741529771          | 13           |
| 0.231819214                          | 0                                                 |               |              |                      |              |
| ENSG00000114942                      | 5666.293289                                       | 7340.04047    | 6437.462959  |                      |              |
| 6811.88945                           | 8893.269532                                       | 8646.44312    | 6481.265573  |                      |              |
| 8117.200701                          | -0.32464698                                       | 0.018294137   | 0.174825425  | EEF1B2               |              |
| 2                                    | 206159585                                         | 206162928     | +            | 1915                 |              |
| protein_coding                       | eukaryotic translation elongation factor 1 beta 2 | [Source:HGNC  |              |                      |              |
| Symbol;Acc:HGNC:3208]                | -                                                 | 5891          | 8436         | 6919                 |              |
| 6181                                 | 7337                                              | 9366          | 148.7378368  | 191.9669172          |              |
| 168.663298                           | 179.3502593                                       | 235.5033563   | 227.4135791  |                      |              |
| ENSG00000182551                      | 807.958982                                        | 824.8409632   | 936.9164908  |                      |              |
| 1376.484375                          | 1023.022964                                       | 1054.264152   | 856.5721454  |                      |              |
| 1151.257163                          | -0.426521922                                      | 0.018379555   | 1            | ADI1                 | 2            |
| 3497361                              | 3519736                                           | -             | 5560         | protein_coding       | acireductone |
| dioxygenase 1                        | [Source:HGNC                                      |               |              |                      |              |
| Symbol;Acc:HGNC:30576]               | -                                                 | 844           | 1142         | 7.304755952          | 840          |
| 948                                  | 1007                                              | 1249          | 12.48244584  | 9.330716951          |              |
| 7.430056966                          | 8.454748918                                       |               |              |                      |              |
| 9.550416909                          |                                                   |               |              |                      |              |
| ENSG00000273888                      | 4.809279655                                       | 13.92136647   | 27.91210996  |                      |              |
| 2.204138311                          | 0                                                 | 0             | 15.54758536  | 0.73471277           |              |
| 4.42129855                           | 0.018388237                                       | 1             | FRMD6-AS1    | 14                   |              |
| 51649516                             | 51651744                                          | -             | 2229         | antisense            | FRMD6        |
| antisense RNA 1                      | [Source:HGNC                                      |               |              |                      |              |
| Symbol;Acc:HGNC:20129]               | -                                                 | 0             | 0            | 0.10845789           | 5            |
| 16                                   | 30                                                | 2             |              |                      |              |
| 0.312801273                          | 0.628285768                                       | 0.049857669   | 0            | 0                    |              |
| ENSG00000271147                      | 94.26188123                                       | 81.788028     | 86.52754086  |                      |              |

|                                                          |                        |                |              |                       |             |             |
|----------------------------------------------------------|------------------------|----------------|--------------|-----------------------|-------------|-------------|
| 42.98069706                                              | 3.636337549            | 34.15741997    | 87.5258167   |                       |             |             |
| 26.92481819                                              | 1.694139356            | 0.018390778    | 1            | ARMCX5-GPRASP2        |             |             |
| X                                                        | 102599512              | 102714671      | +            | 2711                  |             |             |
| processed_transcript                                     | ARMCX5-GPRASP2         | readthrough    | [Source:HGNC |                       |             |             |
| Symbol;Acc:HGNC:42000]                                   | -                      | 98             | 94           | 93                    | 39          | 3           |
| 37                                                       | 1.747824306            | 1.5109738      | 1.601398682  |                       |             |             |
| 0.799368689                                              | 0.068020387            | 0.634604613    |              |                       |             |             |
| ENSG00000162366                                          | 0                      | 0              | 6.612414933  | 26.66647536           |             |             |
| 0                                                        | 0                      | 11.09296343    | -6.030680188 | 0.0183922             |             |             |
| 1                                                        | PDZK1IP1               | 1              | 47183593     | 47191044              |             |             |
| -                                                        | 1438                   | protein_coding | PDZK1        | interacting protein 1 |             |             |
| [Source:HGNC Symbol;Acc:HGNC:16887]                      | -                      | 0              | 0            | 0                     |             |             |
| 6                                                        | 22                     | 0              | 0            | 0                     | 0.231848563 |             |
| 0.940396827                                              | 0                      |                |              |                       |             |             |
| ENSG00000254604                                          | 5.771135586            | 13.92136647    | 8.373632987  | 0                     |             |             |
| 0                                                        | 0                      | 9.355378347    | 0            | 5.568342184           |             |             |
| 0.018488146                                              | 1                      | AP002336.2     | 11           | 70282367              |             |             |
| 70363368                                                 | -                      | 539            | antisense    | novel transcript      |             |             |
| -                                                        | 6                      | 16             | 9            | 0                     | 0           |             |
| 0.538224796                                              | 1.293569643            | 0.779470673    | 0            | 0                     | 0           |             |
| ENSG00000072195                                          | 1377.377693            | 922.2905285    | 1295.121902  |                       |             |             |
| 844.1849731                                              | 856.963549             | 939.790636     | 1198.263375  |                       |             |             |
| 880.3130527                                              | 0.444244547            | 0.018512903    | 1            | SPEG                  | 2           |             |
| 219434846                                                | 219498287              | +              | 17910        | protein_coding        |             |             |
| SPEG complex locus [Source:HGNC                          | Symbol;Acc:HGNC:16901] | -              |              |                       |             |             |
| 1432                                                     | 1060                   | 1392           | 766          | 707                   | 1018        | 3.865882488 |
| 2.579104131                                              | 3.628187187            | 2.376540542    | 2.426449115  |                       |             |             |
| 2.642915088                                              |                        |                |              |                       |             |             |
| ENSG00000283317                                          | 2.885567793            | 16.53162268    | 9.304036652  | 0                     |             |             |
| 0                                                        | 0                      | 9.573742375    | 0            | 5.60199171            |             |             |
| 0.018520555                                              | 1                      | AL831711.1     | 1            | 161433444             |             |             |
| 161440996                                                | -                      | 569            | lincRNA      | novel transcript      |             | -           |
| 3                                                        | 19                     | 10             | 0            | 0                     | 0           | 0.254923695 |
| 1.45512376                                               | 0.820415335            | 0              | 0            | 0                     |             |             |
| ENSG00000235488                                          | 35.58866945            | 0              | 1.86080733   | 0                     | 0           |             |
| 0                                                        | 12.48315893            | 0              | 5.982514794  | 0.018534895           |             |             |
| 1                                                        | JARID2-AS1             | 6              | 15247815     | 15248634              |             |             |
| -                                                        | 455                    | antisense      | JARID2       | antisense RNA 1       |             |             |
| [Source:HGNC Symbol;Acc:HGNC:40314]                      | -                      | 37             | 0            | 2                     |             |             |
| 0                                                        | 0                      | 0              | 3.931801137  | 0                     | 0.205193989 |             |
| 0                                                        | 0                      | 0              |              |                       |             |             |
| ENSG00000167645                                          | 1011.872439            | 1155.473417    | 1343.502893  |                       |             |             |
| 1330.197471                                              | 1563.625146            | 1753.106501    | 1170.282916  |                       |             |             |
| 1548.976372                                              | -0.404721286           | 0.018581468    | 1            | YIF1B                 | 19          |             |
| 38305104                                                 | 38317273               | -              | 3193         | protein_coding        |             |             |
| "Yip1 interacting factor homolog B, membrane trafficking |                        |                |              |                       |             |             |
| protein [Source:HGNC Symbol;Acc:HGNC:30511]"             | -                      | 1052           | 1328         |                       |             |             |
| 1444                                                     | 1207                   | 1290           | 1899         | 15.93008297           | 18.12415444 |             |
| 21.11126759                                              | 21.00488921            | 24.83351253    | 27.65394306  |                       |             |             |
| ENSG00000123143                                          | 6159.725382            | 5940.94314     | 6484.913546  |                       |             |             |

|                                        |                                |                                    |                      |                  |
|----------------------------------------|--------------------------------|------------------------------------|----------------------|------------------|
| 6458.125251                            | 8250.849898                    | 7998.375314                        | 6195.194023          |                  |
| 7569.116821                            | -0.28899356                    | 0.018657585                        | 0.174825425          | PKN1             |
| 19                                     | 14433053                       | 14471867                           | + 4606               |                  |
| protein_coding                         | protein kinase N1 [Source:HGNC | Symbol;Acc:HGNC:9405]              |                      |                  |
| -                                      | 6404 6828                      | 6970 5860                          | 6807 8664            |                  |
| 67.22465872                            | 64.59935423                    | 70.64068148                        | 70.69451609          |                  |
| 90.84042913                            | 87.4632333                     |                                    |                      |                  |
| ENSG00000109066                        | 1451.4406                      | 1285.116142                        | 1329.546838          |                  |
| 1513.14095                             | 1773.320611                    | 1925.739948                        | 1355.36786           |                  |
| 1737.400503                            | -0.358644121                   | 0.018664874                        | 1 TMEM104 17         |                  |
| 74776483                               | 74839779                       | +                                  | 4983 protein_coding  |                  |
| transmembrane protein 104 [Source:HGNC | Symbol;Acc:HGNC:25984]         |                                    |                      |                  |
| -                                      | 1509 1477                      | 1429 1373                          | 1463 2086            |                  |
| 14.6419719                             | 12.91659986                    | 13.38712682                        | 15.31058178          |                  |
| 18.04682467                            | 19.46500121                    |                                    |                      |                  |
| ENSG00000213303                        | 13.46598303                    | 1.740170808                        | 13.95605498          | 0                |
| 0                                      | 0                              | 9.720736273                        | 0                    | 5.621952259      |
| 0.018679472                            | 1                              | AC008481.1                         | 19                   | 11523436         |
| 11523831                               | +                              | 396                                | processed_pseudogene | ribosomal        |
| protein S12 (RPS12) pseudogene         | -                              | 14                                 | 2                    | 15 0             |
| 0                                      | 0                              | 1.709362083                        | 0.220086502          | 1.768243657      |
| 0                                      | 0                              | 0                                  |                      |                  |
| ENSG00000135318                        | 10505.39048                    | 12879.87424                        | 11833.80422          |                  |
| 9463.467838                            | 10151.44232                    | 9765.329418                        | 11739.68964          |                  |
| 9793.413193                            | 0.26157761                     | 0.0186868                          | 0.174825425          | NT5E             |
| 6                                      | 85449584                       | 85495791                           | + 4533               |                  |
| protein_coding                         | 5'-nucleotidase                | ecto [Source:HGNC                  |                      |                  |
| Symbol;Acc:HGNC:8021]                  | -                              | 10922 14803                        | 12719 8587           | 8375             |
| 10578                                  | 116.4977854                    | 142.3058055                        | 130.9825026          |                  |
| 105.2610717                            | 113.5655103                    | 108.5047778                        |                      |                  |
| ENSG00000225082                        | 0                              | 0                                  | 14.32689902          | 18.18168774      |
| 0                                      | 0                              | 10.83619559                        | -5.997727049         | 0.018700162      |
| 1                                      | DAP3P1                         | 1                                  | 155586644            | 155602197        |
| 278                                    | unprocessed_pseudogene         | death associated protein 3         |                      | +                |
| pseudogene 1 [Source:HGNC              | Symbol;Acc:HGNC:17624]         |                                    |                      |                  |
| 0                                      | 0                              | 13                                 | 15                   | 0 0              |
| 2.598427477                            | 3.316605551                    | 0                                  |                      |                  |
| ENSG00000237276                        | 12.5041271                     | 6.960683234                        | 8.373632987          | 0                |
| 0                                      | 0                              | 9.279481108                        | 0                    | 5.555458673      |
| 0.018717544                            | 1                              | AN07L1                             | 1                    | 16215909         |
| -                                      | 1990                           | transcribed_unprocessed_pseudogene |                      | 16228027         |
| anoctamin 7 like 1 [Source:HGNC        | Symbol;Acc:HGNC:32248]         |                                    |                      |                  |
| 8                                      | 9                              | 0                                  | 0                    | 0.315857717      |
| 0.175184432                            | 0.211122961                    | 0                                  | 0                    | 0                |
| ENSG00000203325                        | 1.923711862                    | 2.610256213                        | 26.05130263          | 0                |
| 0                                      | 0                              | 10.19509023                        | 0                    | 5.691371903      |
| 0.018722538                            | 1                              | AL445248.1                         | 1                    | 32052291         |
| 32073474                               | -                              | 624                                | antisense            | novel transcript |
| -                                      | 2                              | 3                                  | 28                   | 0 0              |
| 0.154969639                            | 0.20950542                     | 2.09468864                         | 0                    | 0 0              |



|                                                           |              |             |             |                    |                 |
|-----------------------------------------------------------|--------------|-------------|-------------|--------------------|-----------------|
| ENSG00000167658                                           | 78428.77075  | 68038.06836 | 77527.74621 |                    |                 |
| 79433.83852                                               | 92708.42581  | 95836.4887  | 74664.86177 |                    |                 |
| 89326.25101                                               | -0.258665446 | 0.018779356 | 0.174825425 | EEF2               |                 |
| 19                                                        | 3976056      | 3985469     | -           | 4027               | protein_coding  |
| eukaryotic translation elongation factor 2 [Source:HGNC   |              |             |             |                    |                 |
| Symbol;Acc:HGNC:3214]                                     | -            | 81539       | 78197       | 83327              | 72077 76485     |
| 103812                                                    | 979.0051307  | 846.1883853 | 965.940004  |                    |                 |
| 994.5511322                                               | 1167.459979  | 1198.662577 |             |                    |                 |
| ENSG00000285805                                           | 22.12268641  | 2.610256213 | 4.652018326 | 0                  |                 |
| 0                                                         | 0            | 9.794986983 | 0           | 5.632603333        |                 |
| 0.018820757                                               | 1            | AC012378.2  | 15          | 55588666           |                 |
| 55589811                                                  | +            | 663         | antisense   | "novel transcript, |                 |
| antisense to PYG01"                                       | -            | 23          | 3           | 5                  | 0 0             |
| 0                                                         | 1.67731845   | 0.197181572 | 0.352048511 | 0                  |                 |
| 0                                                         | 0            |             |             |                    |                 |
| ENSG00000167799                                           | 50.01650841  | 68.73674694 | 51.17220159 |                    |                 |
| 90.36967074                                               | 112.726464   | 163.4017118 | 56.64181898 |                    |                 |
| 122.1659488                                               | -1.109778663 | 0.018840372 | 1           | NUDT8              | 11              |
| 67627938                                                  | 67629930     | -           | 1475        | protein_coding     |                 |
| nudix hydrolase 8 [Source:HGNC Symbol;Acc:HGNC:8055]      |              |             |             |                    |                 |
| 52                                                        | 79           | 55          | 82          | 93                 | 177 1.704560969 |
| 2.333961397                                               | 1.740671044  | 3.089113573 | 3.875594121 |                    |                 |
| 5.57971818                                                |              |             |             |                    |                 |
| ENSG00000177156                                           | 1545.702481  | 1379.085366 | 1550.052506 |                    |                 |
| 1647.593387                                               | 2229.074917  | 1891.582528 | 1491.613451 |                    |                 |
| 1922.750277                                               | -0.366111215 | 0.018859855 | 1           | TALD01             | 11              |
| 747329                                                    | 765024       | +           | 3005        | protein_coding     | transaldolase   |
| 1 [Source:HGNC Symbol;Acc:HGNC:11559]                     |              |             |             |                    |                 |
| 1495                                                      | 1839         | 2049        | -           | 1607               | 1585 1666       |
| 25.88073206                                               | 27.64450131  | 37.6170395  | 31.70505422 |                    |                 |
| ENSG00000130723                                           | 5100.722002  | 4253.847541 | 4649.227115 |                    |                 |
| 4115.126226                                               | 3486.035597  | 3826.55421  | 4667.932219 |                    |                 |
| 3809.238678                                               | 0.293091343  | 0.018868326 | 0.174825425 | PRRC2B             |                 |
| 9                                                         | 131373636    | 131500197   | +           | 12390              |                 |
| protein_coding proline rich coiled-coil 2B [Source:HGNC   |              |             |             |                    |                 |
| Symbol;Acc:HGNC:28121]                                    | -            | 5303        | 4889        | 4997               | 3734 2876       |
| 4145                                                      | 20.69433796  | 17.19520384 | 18.82712816 |                    |                 |
| 16.74615285                                               | 14.26806028  | 15.55550972 |             |                    |                 |
| ENSG00000149948                                           | 4461.087808  | 4600.141532 | 4301.256144 |                    |                 |
| 3345.881956                                               | 3071.493116  | 4243.828638 | 4454.161828 |                    |                 |
| 3553.73457                                                | 0.325349002  | 0.018905428 | 0.174825425 | HMGA2              |                 |
| 12                                                        | 65824131     | 65966295    | +           | 15403              |                 |
| protein_coding high mobility group AT-hook 2 [Source:HGNC |              |             |             |                    |                 |
| Symbol;Acc:HGNC:5009]                                     | HMGI/HMGY    | 4638        | 5287        | 4623               | 3036            |
| 2534                                                      | 4597         | 14.55883571 | 14.95762334 | 14.0108542         |                 |
| 10.9523798                                                | 10.11226996  | 13.87714757 |             |                    |                 |
| ENSG00000177283                                           | 5807.686111  | 4867.257751 | 6393.733987 |                    |                 |
| 4393.949723                                               | 4559.967286  | 4890.97327  | 5689.559283 |                    |                 |
| 4614.963426                                               | 0.301826014  | 0.018924257 | 0.174825425 | FZD8               |                 |
| 10                                                        | 35638249     | 35642278    | -           | 4030               |                 |

|                        |                                                                |                        |                                  |              |                |             |  |
|------------------------|----------------------------------------------------------------|------------------------|----------------------------------|--------------|----------------|-------------|--|
| protein_coding         | frizzled class receptor 8                                      | [Source:HGNC           |                                  |              |                |             |  |
| Symbol;Acc:HGNC:4046]  | -                                                              | 6038                   | 5594                             | 6872         | 3987           | 3762        |  |
| 5298                   | 72.44180769                                                    | 60.48894551            |                                  | 79.60202951  |                |             |  |
| 54.97348039            | 57.38007417                                                    | 61.1276818             |                                  |              |                |             |  |
| ENSG00000167106        | 861.8229141                                                    | 938.8221512            |                                  | 1032.748068  |                |             |  |
| 597.3214822            | 709.085822                                                     | 785.6206593            |                                  | 944.4643779  |                |             |  |
| 697.3426545            | 0.437105839                                                    | 0.018941442            |                                  | 1            | FAM102A        | 9           |  |
| 127940579              | 127980513                                                      | -                      |                                  | 6100         | protein_coding |             |  |
|                        | family with sequence similarity 102 member A                   | [Source:HGNC           |                                  |              |                |             |  |
| Symbol;Acc:HGNC:31419] | -                                                              | 896                    | 1079                             | 1110         | 542            | 585         |  |
| 851                    | 7.10197912                                                     | 7.708150888            |                                  | 8.49452658   |                |             |  |
| 4.937208809            | 5.894858588                                                    | 6.486803513            |                                  |              |                |             |  |
| ENSG00000155761        | 8.656703379                                                    | 6.960683234            |                                  | 12.09524765  |                | 0           |  |
| 0                      | 0                                                              | 9.237544753            | 0                                | 5.549144475  |                |             |  |
| 0.018998679            | 1                                                              | SPAG17                 | 1                                | 117953861    |                | 118185223   |  |
| -                      | 9552                                                           | protein_coding         |                                  |              |                |             |  |
| [Source:HGNC           | Symbol;Acc:HGNC:26620]                                         | -                      |                                  | 9            | 8              | 13          |  |
| 0                      | 0                                                              | 0                      | 0.045556402                      | 0.036496757  |                |             |  |
| 0.063532373            | 0                                                              | 0                      | 0                                |              |                |             |  |
| ENSG00000261024        | 0                                                              | 0                      | 0                                | 3.306207466  |                | 12.12112516 |  |
|                        | 11.07808215                                                    | 0                      | 8.835138261                      | -5.706301585 |                |             |  |
| 0.019012816            | 1                                                              | GS1-279B7.1            | 1                                | 185321157    |                |             |  |
| 185335039              | -                                                              | 1205                   | transcribed_processed_pseudogene |              |                |             |  |
|                        | microtubule associated protein 1 light chain 3 beta pseudogene | [Source:NCBI           |                                  |              |                |             |  |
| gene;Acc:100288079]    | -                                                              |                        |                                  | 0            | 0              | 0           |  |
| 3                      | 10                                                             | 12                     | 0                                | 0            | 0              | 0.138339516 |  |
| 0.510105861            | 0.463047152                                                    |                        |                                  |              |                |             |  |
| ENSG00000142541        | 42366.86819                                                    | 51186.25425            |                                  | 50060.36921  |                |             |  |
| 53172.63261            | 55541.41972                                                    | 64646.1484             |                                  | 47871.16388  |                |             |  |
| 57786.73358            | -0.271595408                                                   | 0.019027001            |                                  | 0.174825425  |                | RPL13A      |  |
| 19                     | 49487554                                                       | 49492308               |                                  | +            | 2369           |             |  |
| protein_coding         | ribosomal protein L13a                                         | [Source:HGNC           |                                  |              |                |             |  |
| Symbol;Acc:HGNC:10304] | -                                                              | 44047                  | 58829                            | 53805        | 48248          | 45822       |  |
| 70026                  | 898.9850926                                                    | 1082.143869            |                                  | 1060.238598  |                |             |  |
| 1131.686925            | 1188.93015                                                     | 1374.438389            |                                  |              |                |             |  |
| ENSG00000171320        | 207.7608811                                                    | 352.3845887            |                                  | 294.9379619  |                |             |  |
| 676.6704614            | 319.9977043                                                    | 427.4293364            |                                  | 285.0278106  |                |             |  |
| 474.6991674            | -0.735629268                                                   | 0.01907623             |                                  | 1            | ESC02          | 8           |  |
| 27771949               | 27812640                                                       | +                      |                                  | 7973         | protein_coding |             |  |
|                        | establishment of sister chromatid cohesion N-acetyltransferase | 2                      | [Source:HGNC                     |              |                |             |  |
| Symbol;Acc:HGNC:27230] | -                                                              |                        |                                  | 216          | 405            | 317         |  |
| 614                    | 264                                                            | 463                    | 1.309885105                      | 2.213562847  |                |             |  |
| 1.85602377             | 4.279161236                                                    | 2.03530511             |                                  | 2.700164636  |                |             |  |
| ENSG00000232109        | 0                                                              | 11.31111026            |                                  | 23.26009163  | 0              | 0           |  |
| 0                      | 11.52373396                                                    | 0                      | 5.868736913                      | 0.019100102  |                |             |  |
| 1                      | VN1R54P                                                        | 10                     | 42660728                         | 42661776     |                | +           |  |
| 1049                   | processed_pseudogene                                           | vomer nasal 1 receptor | 54                               |              |                |             |  |
| pseudogene             | [Source:HGNC                                                   | Symbol;Acc:HGNC:37374] | -                                |              | 0              | 13          |  |
| 25                     | 0                                                              | 0                      | 0                                | 0            | 0.540040663    |             |  |
| 1.112526991            | 0                                                              | 0                      | 0                                |              |                |             |  |

|                                 |                                                         |                                     |                                      |                |                  |                |
|---------------------------------|---------------------------------------------------------|-------------------------------------|--------------------------------------|----------------|------------------|----------------|
| ENSG00000105699                 | 44.24537282                                             |                                     | 57.42563668                          |                | 32.56412828      | 0              |
|                                 | 18.18168774                                             | 0                                   | 44.74504593                          |                | 6.060562582      |                |
| 2.911568258                     | 0.019108496                                             |                                     | 1                                    | LSR            | 19               | 35248330       |
|                                 | 35267964                                                | +                                   | 2916                                 | protein_coding | lipolysis        |                |
| stimulated lipoprotein receptor |                                                         |                                     | [Source:HGNC Symbol;Acc:HGNC:29572]  |                |                  |                |
|                                 | -                                                       | 46                                  | 66                                   | 35             | 0                | 15             |
| 0.762731229                     | 0.986313582                                             |                                     | 0.560307661                          |                | 0                | 0.316192162    |
|                                 | 0                                                       |                                     |                                      |                |                  |                |
| ENSG00000274012                 | 241.4258387                                             |                                     | 163.576056                           |                | 446.5937593      |                |
| 101.3903623                     | 86.05998866                                             |                                     | 225.2543371                          |                | 283.865218       |                |
| 137.5682294                     | 1.041054426                                             |                                     | 0.019113508                          |                | 1                | RN7SL2 14      |
|                                 | 49862550                                                | 49862849                            | -                                    |                | 300              | misc_RNA       |
| "RNA, 7SL, cytoplasmic 2        |                                                         |                                     | [Source:HGNC Symbol;Acc:HGNC:23134]" |                |                  |                |
|                                 | -                                                       | 251                                 | 188                                  | 480            | 92               | 71             |
|                                 |                                                         |                                     |                                      |                |                  | 244            |
| 40.45327467                     | 27.30833314                                             |                                     | 74.69061209                          |                | 17.04035414      |                |
| 14.54736897                     | 37.81808989                                             |                                     |                                      |                |                  |                |
| ENSG00000184313                 | 16.35155083                                             |                                     | 5.220512425                          |                | 6.512825656      | 0              |
|                                 | 0                                                       | 9.361629636                         | 0                                    |                | 5.567785294      |                |
| 0.019123515                     | 1                                                       | MROH7                               | 1                                    | 54641754       | 54710266         |                |
|                                 | +                                                       | 9088                                | protein_coding                       | maestro        | heat like repeat |                |
| family member 7                 |                                                         |                                     | [Source:HGNC Symbol;Acc:HGNC:24802]  |                |                  |                |
|                                 | 6                                                       | 7                                   | 0                                    | 0              | 0.090444429      | 17             |
| 0.02877011                      | 0.035956363                                             |                                     | 0                                    | 0              | 0                |                |
| ENSG00000167483                 | 10.58041524                                             |                                     | 0                                    | 24.19049529    | 0                | 0              |
|                                 | 0                                                       | 11.59030351                         | 0                                    | 5.876022103    | 0.01913248       |                |
|                                 | 1                                                       | FAM129C                             | 19                                   | 17523301       | 17553839         | +              |
| 6628                            | protein_coding                                          | family with sequence similarity 129 |                                      |                |                  |                |
| member C                        |                                                         |                                     | [Source:HGNC Symbol;Acc:HGNC:24130]  |                |                  |                |
|                                 | 26                                                      | 0                                   | 0                                    | 0              | 0.080243784      | 0              |
| 0.183120466                     | 0                                                       | 0                                   | 0                                    |                |                  |                |
| ENSG00000143315                 | 1034.956982                                             |                                     | 854.423867                           |                | 902.4915552      |                |
| 792.3877227                     | 581.8140078                                             |                                     | 671.1471438                          |                | 930.6241346      |                |
| 681.7829581                     | 0.448369894                                             |                                     | 0.019136333                          |                | 1                | PIGM 1         |
|                                 | 160024953                                               | 160031991                           | -                                    |                | 7039             | protein_coding |
|                                 | phosphatidylinositol glycan anchor biosynthesis class M |                                     |                                      |                |                  |                |
|                                 | [Source:HGNC Symbol;Acc:HGNC:18858]                     |                                     |                                      |                |                  |                |
|                                 | 719                                                     | 480                                 | 727                                  | 7.390988433    | 6.079377619      |                |
| 6.432900068                     | 5.675837706                                             |                                     | 4.191578773                          |                | 4.802357244      |                |
| ENSG00000095319                 | 2460.427471                                             |                                     | 1962.042587                          |                | 2182.726999      |                |
| 2518.22802                      | 2785.434562                                             |                                     | 2980.927273                          |                | 2201.732352      |                |
| 2761.529952                     | -0.327152834                                            |                                     | 0.019222638                          |                | 0.174825425      | NUP188         |
|                                 | 9                                                       | 128947699                           | 129007096                            | +              | 8041             |                |
| protein_coding                  | nucleoporin                                             | 188                                 | [Source:HGNC Symbol;Acc:HGNC:17859]  |                |                  |                |
|                                 | -                                                       | 2558                                | 2255                                 | 2346           | 2285             | 2298           |
|                                 |                                                         |                                     |                                      |                |                  | 3229           |
| 15.38125225                     | 12.22067183                                             |                                     | 13.61958836                          |                | 15.79022018      |                |
| 17.56658423                     | 18.67192099                                             |                                     |                                      |                |                  |                |
| ENSG00000087365                 | 12008.7713                                              |                                     | 10766.43679                          |                | 13154.04702      |                |
| 13758.23134                     | 14168.3832                                              |                                     | 15058.80634                          |                | 11976.41837      |                |
| 14328.47363                     | -0.258756149                                            |                                     | 0.019234179                          |                | 0.174825425      | SF3B2          |
|                                 | 11                                                      | 66050729                            | 66069308                             | +              | 9795             |                |

|                                  |                                             |                        |                              |                |                |       |  |
|----------------------------------|---------------------------------------------|------------------------|------------------------------|----------------|----------------|-------|--|
| protein_coding                   | splicing factor 3b subunit 2                | [Source:HGNC           |                              |                |                |       |  |
| Symbol;Acc:HGNC:10769]           | -                                           | 12485                  | 12374                        | 14138          | 12484          | 11689 |  |
| 16312                            | 61.62902866                                 | 55.05088044            |                              | 67.37977755    |                |       |  |
| 70.82088725                      | 73.35340505                                 | 77.43437379            |                              |                |                |       |  |
| ENSG00000096384                  | 54807.5128                                  | 46687.91271            |                              | 51664.38512    |                |       |  |
| 60953.24085                      | 60231.08305                                 | 58775.68803            |                              | 51053.27021    |                |       |  |
| 59986.67064                      | -0.232643972                                | 0.019259507            |                              | 0.174825425    |                |       |  |
| HSP90AB1                         | 6                                           | 44246166               | 44253888                     | +              |                | 2980  |  |
| protein_coding                   | heat shock protein 90 alpha family class B  |                        |                              |                |                |       |  |
| member 1 [Source:HGNC            | Symbol;Acc:HGNC:5258]                       | -                      |                              | 56981          | 53659          |       |  |
| 55529                            | 55308                                       | 49691                  | 63667                        | 924.5172507    | 784.6661331    |       |  |
| 869.8605282                      | 1031.296951                                 | 1024.964522            |                              | 993.411402     |                |       |  |
| ENSG00000117399                  | 1073.431219                                 | 1017.999923            |                              | 1257.905755    |                |       |  |
| 1707.105122                      | 1713.927098                                 | 1132.7339              |                              | 1116.445632    |                |       |  |
| 1517.92204                       | -0.442517615                                | 0.019299837            |                              | 1              | CDC20          | 1     |  |
| 43358955                         | 43363203                                    | +                      |                              | 2038           | protein_coding |       |  |
| cell division cycle 20           | [Source:HGNC                                | Symbol;Acc:HGNC:1723]  |                              |                |                |       |  |
| -                                | 1116                                        | 1170                   | 1352                         | 1549           | 1414           | 1227  |  |
| 26.47654008                      | 25.01729097                                 | 30.96838431            |                              | 42.23371469    |                |       |  |
| 42.64740299                      | 27.9944153                                  |                        |                              |                |                |       |  |
| ENSG00000136270                  | 3717.573173                                 | 3914.514234            |                              | 3649.043175    |                |       |  |
| 4037.981385                      | 4755.117401                                 | 4980.521101            |                              | 3760.376861    |                |       |  |
| 4591.206629                      | -0.288071326                                | 0.019329826            |                              | 0.174825425    |                | TBRG4 |  |
| 7                                | 45100100                                    | 45112047               |                              | -              | 5803           |       |  |
| protein_coding                   | transforming growth factor beta regulator 4 |                        |                              |                |                |       |  |
| [Source:HGNC                     | Symbol;Acc:HGNC:17443]                      | -                      |                              | 3865           | 4499           | 3922  |  |
| 3664                             | 3923                                        | 5395                   | 32.20313437                  | 33.78485197    |                |       |  |
| 31.55012285                      | 35.08447144                                 | 41.5540251             |                              | 43.22847318    |                |       |  |
| ENSG00000231028                  | 0                                           | 26.97264753            | 15.81686231                  | 0              |                |       |  |
| 1.212112516                      | 0                                           | 14.26316995            | 0.404037505                  | 5.215381195    |                |       |  |
| 0.019347536                      | 1                                           | LINC00271              | 6                            | 135497801      |                |       |  |
| 135716055                        | +                                           | 3825                   | lincRNA long intergenic non- |                |                |       |  |
| protein coding RNA 271           | [Source:HGNC                                | Symbol;Acc:HGNC:32526] |                              |                |                |       |  |
| 0                                | 31                                          | 17                     | 0                            | 1              | 0              | 0     |  |
| 0.353174104                      | 0.207473922                                 | 0                      | 0.016070002                  | 0              |                |       |  |
| ENSG00000162063                  | 261.6248132                                 | 316.7110871            |                              | 293.0771545    |                |       |  |
| 509.1559498                      | 351.5126297                                 | 452.3550212            |                              | 290.4710183    |                |       |  |
| 437.6745336                      | -0.591819205                                | 0.019366339            |                              | 1              | CCNF           | 16    |  |
| 2429394                          | 2458854                                     | +                      | 6309                         | protein_coding | cyclin F       |       |  |
| [Source:HGNC                     | Symbol;Acc:HGNC:1591]                       | -                      |                              | 272            | 364            | 315   |  |
| 462                              | 290                                         | 490                    | 2.084536928                  | 2.514197869    |                |       |  |
| 2.330751982                      | 4.06905436                                  | 2.825431812            |                              | 3.61132497     |                |       |  |
| ENSG00000197140                  | 20.19897455                                 | 67.86666153            |                              | 33.49453195    |                |       |  |
| 6.612414933                      | 15.75746271                                 | 4.615867564            |                              | 40.52005601    |                |       |  |
| 8.995248403                      | 2.186082604                                 | 0.019407718            |                              | 1              | ADAM32         | 8     |  |
| 39106990                         | 39284911                                    | +                      |                              | 10044          | protein_coding |       |  |
| ADAM metalloproteinase domain 32 | [Source:HGNC                                |                        |                              |                |                |       |  |
| Symbol;Acc:HGNC:15479]           | -                                           | 21                     | 78                           | 36             | 6              | 13    |  |
| 5                                | 0.101091306                                 | 0.338412578            |                              | 0.167317679    |                |       |  |
| 0.033193771                      | 0.079558028                                 | 0.023146979            |                              |                |                |       |  |

|                                                            |              |             |                      |                |             |             |
|------------------------------------------------------------|--------------|-------------|----------------------|----------------|-------------|-------------|
| ENSG00000269304                                            | 22.12268641  | 1.740170808 | 5.582421991          | 0              |             |             |
| 0                                                          | 0            | 9.81509307  | 0                    | 5.635503554    |             |             |
| 0.019454356                                                | 1            | FKBP1AP1    | 19                   | 57826461       |             |             |
| 57826778                                                   | -            | 318         | processed_pseudogene | FK506 binding  |             |             |
| protein 1A pseudogene 1 [Source:HGNC Symbol;Acc:HGNC:3714] |              |             |                      | -              |             |             |
| 23                                                         | 2            | 6           | 0                    | 0              | 3.497050731 |             |
| 0.274069983                                                | 0.88078552   | 0           | 0                    | 0              |             |             |
| ENSG00000121068                                            | 287.5949234  | 201.8598138 | 232.6009163          |                |             |             |
| 100.2882931                                                | 168.4836398  | 144.015068  | 240.6852178          |                |             |             |
| 137.595667                                                 | 0.806968196  | 0.019463598 | 1                    | TBX2           | 17          |             |
| 61399896                                                   | 61409466     | +           | 6029                 | protein_coding |             |             |
| T-box 2 [Source:HGNC Symbol;Acc:HGNC:11597]                |              |             | T-box                | 299            |             |             |
| 232                                                        | 250          | 91          | 139                  | 156            | 2.397878209 |             |
| 1.67687735                                                 | 1.935712081  | 0.838702914 | 1.417153444          |                |             |             |
| 1.20312384                                                 |              |             |                      |                |             |             |
| ENSG00000099834                                            | 186.6000506  | 137.4734939 | 93.97077018          |                |             |             |
| 27.55172889                                                | 3.636337549  | 96.01004532 | 139.3481049          |                |             |             |
| 42.39937059                                                | 1.707130508  | 0.019464757 | 1                    | CDHR5          | 11          |             |
| 616565                                                     | 626078       | -           | 3873                 | protein_coding | cadherin    |             |
| related family member 5 [Source:HGNC Symbol;Acc:HGNC:7521] |              |             |                      |                | -           |             |
| 194                                                        | 158          | 101         | 25                   | 3              | 104         | 2.421895774 |
| 1.777739768                                                | 1.217362481  | 0.358677848 | 0.047612515          |                |             |             |
| 1.248581398                                                |              |             |                      |                |             |             |
| ENSG00000177674                                            | 1149.417837  | 1433.900746 | 1333.268452          |                |             |             |
| 1450.323009                                                | 1728.472448  | 1931.278989 | 1305.529012          |                |             |             |
| 1703.358148                                                | -0.383890035 | 0.019479833 | 1                    | AGTRAP         | 1           |             |
| 11736084                                                   | 11754802     | +           | 2435                 | protein_coding |             |             |
| angiotensin II receptor associated protein [Source:HGNC    |              |             |                      |                |             |             |
| Symbol;Acc:HGNC:13539]                                     | -            | 1195        | 1648                 | 1433           | 1316        | 1426        |
| 2092                                                       | 23.72849296  | 29.49285662 | 27.47218869          |                |             |             |
| 30.03094284                                                | 35.99713362  | 39.94787965 |                      |                |             |             |
| ENSG00000152520                                            | 1181.159083  | 1225.950335 | 1016.931206          |                |             |             |
| 978.63741                                                  | 774.5398979  | 829.0098144 | 1141.346875          |                |             |             |
| 860.7290408                                                | 0.407063526  | 0.019527586 | 1                    | PAN3           | 13          |             |
| 28138506                                                   | 28295335     | +           | 6352                 | protein_coding |             |             |
| poly(A) specific ribonuclease subunit PAN3 [Source:HGNC    |              |             |                      |                |             |             |
| Symbol;Acc:HGNC:29991]                                     | -            | 1228        | 1409                 | 1093           | 888         | 639         |
| 898                                                        | 9.347362683  | 9.666273999 | 8.032592             |                |             |             |
| 7.768094854                                                | 6.183547894  | 6.573502999 |                      |                |             |             |
| ENSG00000105290                                            | 22.12268641  | 8.700854042 | 11.16484398          |                |             |             |
| 52.89931946                                                | 41.21182555  | 51.69771671 | 13.99612815          |                |             |             |
| 48.60295391                                                | -1.79984582  | 0.019548533 | 1                    | APLP1          | 19          |             |
| 35867899                                                   | 35879791     | +           | 3656                 | protein_coding |             |             |
| amyloid beta precursor like protein 1 [Source:HGNC         |              |             |                      |                |             |             |
| Symbol;Acc:HGNC:597]                                       | -            | 23          | 10                   | 12             | 48          | 34          |
| 56                                                         | 0.304174544  | 0.119193456 | 0.153221989          |                |             |             |
| 0.729536615                                                | 0.571636683  | 0.712217857 |                      |                |             |             |
| ENSG00000255348                                            | 16.35155083  | 6.960683234 | 4.652018326          |                |             | 0           |
| 0                                                          | 0            | 9.321417462 | 0                    | 5.56176095     |             |             |
| 0.019569225                                                | 1            | AP001775.2  | 11                   | 134178824      |             |             |

|                                                             |              |          |                |                  |              |                |    |
|-------------------------------------------------------------|--------------|----------|----------------|------------------|--------------|----------------|----|
| 134186166                                                   | +            | 334      | antisense      | novel transcript |              |                |    |
| -                                                           | 17           | 8        | 5              | 0                | 0            | 0              |    |
| 2.460954992                                                 | 1.043763529  |          | 0.698826835    |                  | 0            | 0              | 0  |
| ENSG00000136827                                             | 1843.87782   |          | 1832.399861    |                  | 1730.550817  |                |    |
| 2190.913481                                                 | 2246.044493  |          | 2199.922481    |                  | 1802.276166  |                |    |
| 2212.293485                                                 | -0.295665897 |          | 0.019627201    |                  | 1            | TOR1A          | 9  |
| 129812944                                                   | 129824134    |          | -              |                  | 3766         | protein_coding |    |
| torsin family 1 member A [Source:HGNC Symbol;Acc:HGNC:3098] |              |          |                |                  |              |                |    |
| -                                                           | 1917         | 2106     | 1860           | 1988             | 1853         | 2383           |    |
| 24.6117794                                                  | 24.36894058  |          | 23.05571868    |                  | 29.3324344   |                |    |
| 30.24422525                                                 | 29.422173    |          |                |                  |              |                |    |
| ENSG00000092607                                             | 0            | 0        | 2.791210996    |                  | 0            | 26.66647536    |    |
| 34.15741997                                                 | 0.930403665  |          | 20.27463178    |                  | -4.451713849 |                |    |
| 0.019670712                                                 | 1            |          | TBX15          | 1                | 118883046    |                |    |
| 118989556                                                   | -            | 4349     | protein_coding | T-box 15         | [Source:HGNC |                |    |
| Symbol;Acc:HGNC:11594] T-box                                |              |          |                |                  |              |                |    |
|                                                             | 0            | 0        | 0              | 0                | 3            | 0              | 22 |
| 37                                                          | 0            | 0        | 0.032201632    |                  | 0            | 0.310942892    |    |
| 0.395588205                                                 |              |          |                |                  |              |                |    |
| ENSG00000005194                                             | 2126.663463  |          | 1943.770793    |                  | 2059.913715  |                |    |
| 2223.975556                                                 | 2766.040762  |          | 2666.125105    |                  | 2043.449324  |                |    |
| 2552.047141                                                 | -0.320705479 |          | 0.019678731    |                  | 1            | CIAPIN1        | 16 |
| 57428169                                                    | 57447528     |          | -              |                  | 3509         | protein_coding |    |
| cytokine induced apoptosis inhibitor 1 [Source:HGNC         |              |          |                |                  |              |                |    |
| Symbol;Acc:HGNC:28050] -                                    |              |          |                |                  |              |                |    |
|                                                             | 2211         | 2234     | 2214           | 2018             | 2282         |                |    |
| 2888                                                        | 30.46537939  |          | 27.7433179     |                  | 29.45372883  |                |    |
| 31.95581052                                                 | 39.97418629  |          | 38.26879952    |                  |              |                |    |
| ENSG00000183808                                             | 1036.880694  |          | 783.0768638    |                  | 915.5172065  |                |    |
| 686.5890838                                                 | 716.3584971  |          | 618.5262535    |                  | 911.8249213  |                |    |
| 673.8246115                                                 | 0.436717756  |          | 0.019719881    |                  | 1            | RBM12B         | 8  |
| 93729356                                                    | 93741017     |          | -              |                  | 7618         | protein_coding |    |
| RNA binding motif protein 12B [Source:HGNC                  |              |          |                |                  |              |                |    |
| Symbol;Acc:HGNC:32310] -                                    |              |          |                |                  |              |                |    |
|                                                             | 1078         | 900      | 984            | 623              | 591          |                |    |
| 670                                                         | 6.841936025  |          | 5.148256054    |                  | 6.029761937  |                |    |
| 4.544217627                                                 | 4.768632702  |          | 4.089449528    |                  |              |                |    |
| ENSG00000141034                                             | 556.914584   |          | 502.0392782    |                  | 614.066419   |                |    |
| 438.6235239                                                 | 324.8461544  |          | 397.887784     |                  | 557.6734271  |                |    |
| 387.1191541                                                 | 0.525748409  |          | 0.019762409    |                  | 1            | GID4           | 17 |
| 18039292                                                    | 18068404     |          | +              |                  | 5210         | protein_coding |    |
| GID complex subunit 4 homolog [Source:HGNC                  |              |          |                |                  |              |                |    |
| Symbol;Acc:HGNC:28453] -                                    |              |          |                |                  |              |                |    |
|                                                             | 579          | 577      | 660            | 398              | 268          |                |    |
| 431                                                         | 5.37331198   |          | 4.826104123    |                  | 5.913604124  |                |    |
| 4.244801562                                                 | 3.161873065  |          | 3.846542763    |                  |              |                |    |
| ENSG00000110841                                             | 3868.584554  |          | 3271.52112     |                  | 3066.61048   |                |    |
| 3132.08054                                                  | 2538.163609  |          | 2358.708325    |                  | 3402.238718  |                |    |
| 2676.317491                                                 | 0.346351692  |          | 0.019772799    |                  | 0.17712177   |                |    |
| PPFIBP1                                                     | 12           | 27523431 | 27695564       |                  | +            | 11690          |    |
| protein_coding PPFIA binding protein 1 [Source:HGNC         |              |          |                |                  |              |                |    |
| Symbol;Acc:HGNC:9249] -                                     |              |          |                |                  |              |                |    |
|                                                             | 4022         | 3760     | 3296           | 2842             | 2094         |                |    |
| 2555                                                        | 16.63522853  |          | 14.01625311    |                  | 13.16190427  |                |    |
| 13.50895037                                                 | 11.010563    |          | 10.16266036    |                  |              |                |    |

|                                                                |              |           |             |                |                |                |             |
|----------------------------------------------------------------|--------------|-----------|-------------|----------------|----------------|----------------|-------------|
| ENSG00000147324                                                | 846.4332192  |           | 845.7230129 |                | 870.8578306    |                |             |
| 1127.416746                                                    | 1063.022677  |           | 1110.577736 |                | 854.3380209    |                |             |
| 1100.339053                                                    | -0.365212659 |           | 0.019775984 |                | 1              | MFHAS1         | 8           |
| 8783354                                                        | 8893645      | -         | 6883        | protein_coding |                | malignant      |             |
| fibrous histiocyoma amplified sequence 1 [Source:HGNC          |              |           |             |                |                |                |             |
| Symbol;Acc:HGNC:16982]                                         | -            |           | 880         | 972            | 936            | 1023           | 877         |
| 1203                                                           | 6.181674298  |           | 6.15385265  |                | 6.348105197    |                |             |
| 8.2586661                                                      | 7.831936976  |           | 8.126786976 |                |                |                |             |
| ENSG00000104904                                                | 11857.75992  |           | 13529.82804 |                | 12792.11999    |                |             |
| 14288.3266                                                     | 15495.64641  |           | 15296.98511 |                | 12726.56932    |                |             |
| 15026.98604                                                    | -0.239681784 |           | 0.019776668 |                | 0.17712177     |                | OAZ1        |
| 19                                                             | 2269509      | 2273490   | +           | 3436           | protein_coding |                |             |
| ornithine decarboxylase antizyme 1 [Source:HGNC                |              |           |             |                |                |                |             |
| Symbol;Acc:HGNC:8095]                                          | -            |           | 12328       | 15550          | 13749          | 12965          | 12784 16570 |
| 173.4765142                                                    | 197.2131346  |           | 186.7944604 |                | 209.6676413    |                |             |
| 228.697263                                                     | 224.2334358  |           |             |                |                |                |             |
| ENSG00000110717                                                | 1766.929345  |           | 1487.846041 |                | 1574.243002    |                |             |
| 1891.150671                                                    | 2227.862805  |           | 1972.821797 |                | 1609.672796    |                |             |
| 2030.611757                                                    | -0.335049368 |           | 0.019806074 |                | 1              | NDUFS8         | 11          |
| 68030617                                                       |              | 68036644  | +           |                | 4523           | protein_coding |             |
| NADH:ubiquinone oxidoreductase core subunit S8 [Source:HGNC    |              |           |             |                |                |                |             |
| Symbol;Acc:HGNC:7715]                                          | -            |           | 1837        | 1710           | 1692           | 1716           | 1838        |
| 2137                                                           | 19.63739089  |           | 16.47510232 |                | 17.46303831    |                |             |
| 21.08155974                                                    | 24.97849567  |           | 21.9689324  |                |                |                |             |
| ENSG00000102595                                                | 484.7753892  |           | 297.5692083 |                | 341.4581451    |                |             |
| 273.3131505                                                    | 249.6951784  |           | 154.1699766 |                | 374.6009142    |                |             |
| 225.7261018                                                    | 0.73241114   |           | 0.019822185 |                | 1              | UGGT2          | 13          |
| 95801580                                                       |              | 96053482  | -           |                | 8105           | protein_coding |             |
| UDP-glucose glycoprotein glucosyltransferase 2 [Source:HGNC    |              |           |             |                |                |                |             |
| Symbol;Acc:HGNC:15664]                                         | -            |           | 504         | 342            | 367            | 248            | 206         |
| 167                                                            | 3.006621327  |           | 1.838788101 |                | 2.113776576    |                |             |
| 1.700241864                                                    | 1.562289671  |           | 0.958063887 |                |                |                |             |
| ENSG00000112319                                                | 368.3908216  |           | 284.5179272 |                | 388.908732     |                |             |
| 559.851131                                                     | 475.1481064  |           | 485.5892677 |                | 347.2724936    |                |             |
| 506.862835                                                     | -0.545955128 |           | 0.019995734 |                | 1              | EYA4           | 6           |
| 133240598                                                      |              | 133532120 | +           |                | 8968           | protein_coding |             |
| EYA transcriptional coactivator and phosphatase 4 [Source:HGNC |              |           |             |                |                |                |             |
| Symbol;Acc:HGNC:3522]                                          | -            |           | 383         | 327            | 418            | 508            | 392         |
| 526                                                            | 2.064925516  |           | 1.588951901 |                | 2.175838806    |                |             |
| 3.147604491                                                    | 2.686815392  |           | 2.727226214 |                |                |                |             |
| ENSG00000142507                                                | 1853.496379  |           | 1640.110987 |                | 1673.796194    |                |             |
| 2024.501039                                                    | 2568.466422  |           | 1991.285267 |                | 1722.467853    |                |             |
| 2194.750909                                                    | -0.349193913 |           | 0.020041542 |                | 1              | PSMB6          | 17          |
| 4796144                                                        | 4798503      | +         | 1448        | protein_coding |                | proteasome     |             |
| subunit beta 6 [Source:HGNC                                    |              |           |             |                |                |                |             |
| Symbol;Acc:HGNC:9543]                                          | -            |           | 2119        | 2157           | 64.34493541    |                | 1927        |
| 1885                                                           | 1799         | 1837      |             |                |                |                |             |
| 56.72851178                                                    | 57.99741503  |           | 70.49407855 |                | 89.95177861    |                |             |
| 69.26480268                                                    |              |           |             |                |                |                |             |
| ENSG00000107165                                                | 37.51238131  |           | 19.14187889 |                | 6.512825656    |                | 0           |
| 0                                                              | 4.615867564  |           | 21.05569529 |                | 1.538622521    |                |             |

|                                                         |                                               |                |                  |                |             |      |
|---------------------------------------------------------|-----------------------------------------------|----------------|------------------|----------------|-------------|------|
| 3.709172136                                             | 0.02004754                                    | 1              | TYRP1            | 9              | 12685439    |      |
| 12710290                                                | +                                             | 3741           | protein_coding   |                | tyrosinase  |      |
| related protein 1 [Source:HGNC                          | Symbol;Acc:HGNC:12450]                        | -              |                  |                | 39          |      |
| 22                                                      | 7                                             | 0              | 0                | 5              | 0.504055218 |      |
| 0.256267523                                             | 0.087348684                                   | 0              | 0                | 0.062146019    |             |      |
| ENSG00000272308                                         | 34.62681351                                   | 0              | 1.86080733       | 0              | 0           |      |
| 0                                                       | 12.16254028                                   | 0              | 5.944966861      | 0.020133843    |             |      |
| 1                                                       | AC104113.1                                    | 5              | 60866457         | 60866935       |             |      |
| -                                                       | 479                                           | lincRNA        | novel transcript | -              | 36          |      |
| 0                                                       | 2                                             | 0              | 0                | 3.633860104    | 0           |      |
| 0.194912871                                             | 0                                             | 0              | 0                |                |             |      |
| ENSG00000185650                                         | 4468.782655                                   | 4146.827037    | 4432.443061      |                |             |      |
| 4173.535892                                             | 3269.067456                                   | 2905.227045    | 4349.350918      |                |             |      |
| 3449.276798                                             | 0.334688481                                   | 0.020145161    | 0.179546192      |                |             |      |
| ZFP36L1 14                                              | 68787660                                      | 68796253       | -                | 5160           |             |      |
| protein_coding                                          | ZFP36 ring finger protein like 1 [Source:HGNC |                |                  |                |             |      |
| Symbol;Acc:HGNC:1107]                                   | Others                                        | 4646           | 4766             | 4764           | 3787        | 2697 |
| 3147                                                    | 43.53421526                                   | 40.24972654    | 43.09908866      |                |             |      |
| 40.78097898                                             | 32.12762375                                   | 28.35816071    |                  |                |             |      |
| ENSG00000096746                                         | 1974.690226                                   | 1921.148573    | 2448.822447      |                |             |      |
| 1665.226494                                             | 1494.534733                                   | 1800.18835     | 2114.887082      |                |             |      |
| 1653.316525                                             | 0.354715227                                   | 0.020157374    | 1                | HNRNPH3        | 10          |      |
| 68331174                                                | 68343191                                      | +              | 5373             | protein_coding |             |      |
| heterogeneous nuclear ribonucleoprotein H3 [Source:HGNC |                                               |                |                  |                |             |      |
| Symbol;Acc:HGNC:5043]                                   | -                                             | 2053           | 2208             | 2632           | 1511        | 1233 |
| 1950                                                    | 18.47452688                                   | 17.90774189    | 22.86731005      |                |             |      |
| 15.62642628                                             | 14.105666                                     | 16.87519457    |                  |                |             |      |
| ENSG00000234740                                         | 6.732991517                                   | 27.84273294    | 0                | 0              | 0           |      |
| 0                                                       | 11.52524148                                   | 0              | 5.869697933      | 0.020166214    |             |      |
| 1                                                       | AL162386.2                                    | 9              | 13274510         | 13279187       |             |      |
| -                                                       | 457                                           | sense_intronic | novel transcript | -              |             |      |
| 7                                                       | 32                                            | 0              | 0                | 0              | 0.740598889 |      |
| 3.051352462                                             | 0                                             | 0              | 0                | 0              |             |      |
| ENSG00000167524                                         | 130.8124066                                   | 82.6581134     | 126.5348985      |                |             |      |
| 74.94070257                                             | 12.12112516                                   | 38.77328753    | 113.3351395      |                |             |      |
| 41.94503842                                             | 1.431108131                                   | 0.020178849    | 1                | SGK494         | 17          |      |
| 28607964                                                | 28614200                                      | -              | 4663             | protein_coding |             |      |
| uncharacterized serine/threonine-protein kinase SgK494  |                                               |                |                  |                |             |      |
| [Source:NCBI gene;Acc:124923]                           | -                                             | 136            | 95               | 136            | 68          |      |
| 10                                                      | 42                                            | 1.410180514    | 0.887803367      | 1.361505903    |             |      |
| 0.810318102                                             | 0.131820193                                   | 0.418807927    |                  |                |             |      |
| ENSG00000166337                                         | 252.0062539                                   | 225.3521197    | 482.8795022      |                |             |      |
| 110.2069155                                             | 232.7256031                                   | 179.0956615    | 320.0792919      |                |             |      |
| 174.0093934                                             | 0.879927617                                   | 0.020277829    | 1                | TAF10          | 11          |      |
| 6606296                                                 | 6612667                                       | -              | 6103             | protein_coding | TATA-box    |      |
| binding protein associated factor 10 [Source:HGNC       |                                               |                |                  |                |             |      |
| Symbol;Acc:HGNC:11543]                                  | -                                             | 262            | 259              | 519            | 100         | 192  |
| 194                                                     | 2.075673964                                   | 1.849332457    | 3.969812764      |                |             |      |
| 0.910476359                                             | 1.933771783                                   | 1.478050859    |                  |                |             |      |
| ENSG00000164171                                         | 2616.248132                                   | 2205.6665      | 2092.477843      |                |             |      |



|                 |                                                                                                                                                      |             |             |                |      |             |
|-----------------|------------------------------------------------------------------------------------------------------------------------------------------------------|-------------|-------------|----------------|------|-------------|
| 2038.827938     | 1349.081231                                                                                                                                          | 1856.501934 | 2304.797492 |                |      |             |
| 1748.137034     | 0.39828809                                                                                                                                           | 0.020296185 | 1           | ITGA2          | 5    |             |
| 52989326        | 53094779                                                                                                                                             | +           | 7910        | protein_coding |      |             |
|                 | integrin subunit alpha 2 [Source:HGNC Symbol;Acc:HGNC:6137]                                                                                          |             |             |                |      |             |
| -               | 2720                                                                                                                                                 | 2535        | 2249        | 1850           | 1113 | 2011        |
| 16.62622437     | 13.9656154                                                                                                                                           | 13.27269173 | 12.99592776 |                |      |             |
| 8.649002866     | 11.82133719                                                                                                                                          |             |             |                |      |             |
| ENSG00000272325 | 203.9134574                                                                                                                                          | 235.7931445 | 291.2163472 |                |      |             |
| 109.1048464     | 104.2416764                                                                                                                                          | 192.9432642 | 243.640983  |                |      |             |
| 135.429929      | 0.843579035                                                                                                                                          | 0.0203378   | 1           | NUDT3          | 6    |             |
| 34279679        | 34392674                                                                                                                                             | -           | 9905        | protein_coding |      |             |
|                 | nudix hydrolase 3 [Source:HGNC Symbol;Acc:HGNC:8050]                                                                                                 |             |             |                |      |             |
| 212             | 271                                                                                                                                                  | 313         | 99          | 86             | 209  | 1.034862375 |
| 1.192266685     | 1.475149015                                                                                                                                          | 0.555383225 | 0.533692785 |                |      |             |
| 0.981121571     |                                                                                                                                                      |             |             |                |      |             |
| ENSG00000122642 | 1646.697354                                                                                                                                          | 1671.434062 | 1906.39711  |                |      |             |
| 1548.407163     | 1366.050806                                                                                                                                          | 1066.265407 | 1741.509508 |                |      |             |
| 1326.907792     | 0.392931638                                                                                                                                          | 0.020355575 | 1           | FKBP9          | 7    |             |
| 32957404        | 33006931                                                                                                                                             | +           | 5170        | protein_coding |      |             |
|                 | FK506 binding protein 9 [Source:HGNC Symbol;Acc:HGNC:3725]                                                                                           |             |             |                |      |             |
| -               | 1712                                                                                                                                                 | 1921        | 2049        | 1405           | 1127 | 1155        |
| 16.01085166     | 16.19181076                                                                                                                                          | 18.50109577 | 15.10072591 |                |      |             |
| 13.3992575      | 10.38777321                                                                                                                                          |             |             |                |      |             |
| ENSG00000250251 | 294.3279149                                                                                                                                          | 215.7811803 | 452.1761813 |                |      |             |
| 238.0469376     | 157.5746271                                                                                                                                          | 156.0163237 | 320.7617588 |                |      |             |
| 183.8792961     | 0.802788383                                                                                                                                          | 0.020492312 | 1           | PKD1P6         | 16   |             |
| 15125242        | 15154564                                                                                                                                             | -           | 6015        |                |      |             |
|                 | transcribed_unprocessed_pseudogene "polycystin 1, transient receptor potential channel interacting pseudogene 6 [Source:HGNC Symbol;Acc:HGNC:30070]" |             |             |                |      |             |
| 169             | 2.459727583                                                                                                                                          | 1.79669619  | 3.77178278  | 486            | 216  | 130         |
| 1.995400897     | 1.328480184                                                                                                                                          | 1.306417806 |             |                |      |             |
| ENSG00000185267 | 36.55052538                                                                                                                                          | 22.62222051 | 59.54583457 |                |      |             |
| 13.22482987     | 9.69690013                                                                                                                                           | 5.539041076 | 39.57286015 |                |      |             |
| 9.486923691     | 2.06643041                                                                                                                                           | 0.020498509 | 1           | CDNF           | 10   |             |
| 14819250        | 14838575                                                                                                                                             | -           | 1733        | protein_coding |      |             |
|                 | cerebral dopamine neurotrophic factor [Source:HGNC Symbol;Acc:HGNC:24913]                                                                            |             |             |                |      |             |
| 6               | 1.060196217                                                                                                                                          | 0.653782638 | 1.723961041 | 64             | 12   | 8           |
| 0.384764262     | 0.283751904                                                                                                                                          | 0.160984368 |             |                |      |             |
| ENSG00000135473 | 552.1053044                                                                                                                                          | 455.9247518 | 473.5754656 |                |      |             |
| 383.5200661     | 344.2399546                                                                                                                                          | 289.876483  | 493.8685073 |                |      |             |
| 339.2121679     | 0.542713484                                                                                                                                          | 0.020564147 | 1           | PAN2           | 12   |             |
| 56316223        | 56334053                                                                                                                                             | -           | 7288        | protein_coding |      |             |
|                 | poly(A) specific ribonuclease subunit PAN2 [Source:HGNC Symbol;Acc:HGNC:20074]                                                                       |             |             |                |      |             |
| 314             | 3.808068439                                                                                                                                          | 3.133152406 | 3.260284162 | 509            | 348  | 284         |
| 2.653279024     | 2.39528578                                                                                                                                           | 2.003329112 |             |                |      |             |
| ENSG00000105197 | 2373.860438                                                                                                                                          | 2117.787874 | 2070.148155 |                |      |             |
| 2180.994859     | 3079.977904                                                                                                                                          | 3239.415856 | 2187.265489 |                |      |             |

|                                                  |                                                |                           |              |                |
|--------------------------------------------------|------------------------------------------------|---------------------------|--------------|----------------|
| 2833.462873                                      | -0.373638074                                   | 0.020592551               | 0.182490169  | TIMM50         |
| 19                                               | 39480412                                       | 39493785                  | + 6911       |                |
| protein_coding                                   | translocase of inner mitochondrial membrane 50 |                           |              |                |
| [Source:HGNC Symbol;Acc:HGNC:23656]              | -                                              | 2468                      | 2434         | 2225           |
| 1979                                             | 2541 3509                                      | 17.26654635               | 15.3475225   |                |
| 15.02917558                                      | 15.9117133                                     | 22.60014015               | 23.60877718  |                |
| ENSG00000248124                                  | 196.2186099                                    | 171.4068246               | 137.6997424  |                |
| 123.4317454                                      | 71.51463846                                    | 61.85262535               | 168.4417257  |                |
| 85.59966974                                      | 0.977854745                                    | 0.020631052               | 1            | RRN3P1 16      |
| 21796106                                         | 21820410                                       | -                         | 5253         |                |
| transcribed_unprocessed_pseudogene               | "RRN3 homolog, RNA polymerase                  |                           |              |                |
| I transcription factor pseudogene 1 [Source:HGNC |                                                |                           |              |                |
| Symbol;Acc:HGNC:30548]"                          | -                                              | 204 197                   | 148 112      | 59             |
| 67                                               | 1.877690388                                    | 1.634245972               | 1.315225893  |                |
| 1.184738947                                      | 0.690385992                                    | 0.593059709               |              |                |
| ENSG00000261136                                  | 0 22.62222051                                  | 11.16484398               | 0 0          |                |
| 0                                                | 11.26235483                                    | 0 5.836367925             | 0.02065128   |                |
| 1                                                | AC023908.3                                     | 15 39782571               | 39785617     |                |
| +                                                | 3047 antisense                                 | uncharacterized           | LOC105370941 |                |
| [Source:NCBI gene;Acc:105370941]                 | -                                              | 0                         | 26 12        |                |
| 0                                                | 0 0                                            | 0 0.371842898             | 0.183846272  |                |
| 0                                                | 0 0                                            |                           |              |                |
| ENSG0000013275                                   | 6518.497644                                    | 6157.594406               | 5519.154542  |                |
| 6950.750163                                      | 7493.279576                                    | 7320.765956               | 6065.082197  |                |
| 7254.931898                                      | -0.258432944                                   | 0.020674267               | 0.182490169  | PSMC4          |
| 19                                               | 39971005                                       | 39981441                  | + 2387       |                |
| protein_coding                                   | "proteasome 26S subunit, ATPase 4 [Source:HGNC |                           |              |                |
| Symbol;Acc:HGNC:9551]"                           | -                                              | 6777 7077                 | 5932 6307    | 6182           |
| 7930                                             | 137.2733661                                    | 129.1978761               | 116.0098217  |                |
| 146.8190656                                      | 159.1929908                                    | 154.4727174               |              |                |
| ENSG00000112137                                  | 218.3412963                                    | 143.5640917               | 167.4726597  |                |
| 89.26760159                                      | 83.63576363                                    | 112.6271686               | 176.4593493  |                |
| 95.17684459                                      | 0.888018977                                    | 0.02071248                | 1            | PHACTR1 6      |
| 12716805                                         | 13290484                                       | +                         | 11198        | protein_coding |
| phosphatase and actin regulator 1 [Source:HGNC   |                                                |                           |              |                |
| Symbol;Acc:HGNC:20990]                           | -                                              | 227 165                   | 180 81       | 69             |
| 122                                              | 0.980136608                                    | 0.642099126               | 0.750374519  |                |
| 0.401935716                                      | 0.378752918                                    | 0.506582736               |              |                |
| ENSG00000128039                                  | 1137.875566                                    | 1478.275102               | 1341.642085  |                |
| 1453.629216                                      | 1824.229337                                    | 1891.582528               | 1319.264251  |                |
| 1723.147027                                      | -0.385256985                                   | 0.0207764                 | 1            | SRD5A3 4       |
| 55346109                                         | 55373096                                       | +                         | 4420         | protein_coding |
| steroid 5 alpha-reductase 3 [Source:HGNC         |                                                |                           |              |                |
| Symbol;Acc:HGNC:25812]                           | -                                              | 1183 1699                 | 1442 1319    | 1505           |
| 2049                                             | 12.94087648                                    | 16.75057452               | 15.22961858  |                |
| 16.58191062                                      | 20.92963193                                    | 21.55513301               |              |                |
| ENSG00000121380                                  | 27.893822                                      | 0 6.512825656             | 0 0          |                |
| 0                                                | 11.46888255                                    | 0 5.860292573             | 0.020797488  |                |
| 1                                                | BCL2L14 12                                     | 12049844                  | 12211084     | +              |
| 5112                                             | protein_coding                                 | BCL2 like 14 [Source:HGNC |              |                |

|                                                 |                                     |                                      |              |                              |             |      |
|-------------------------------------------------|-------------------------------------|--------------------------------------|--------------|------------------------------|-------------|------|
| Symbol;Acc:HGNC:16657]                          | -                                   | 29                                   | 0            | 7                            | 0           | 0    |
| 0                                               | 0.274288986                         | 0                                    | 0.063922423  | 0                            | 0           | 0    |
| 0                                               |                                     |                                      |              |                              |             |      |
| ENSG00000179195                                 | 1986.232497                         | 1851.54174                           | 1685.891441  |                              |             |      |
| 1582.571307                                     | 1487.262058                         | 1268.440406                          | 1841.221893  |                              |             |      |
| 1446.091257                                     | 0.3489773                           | 0.02082531                           | 1            | ZNF664                       | 12          |      |
| 123971845                                       | 124015439                           | +                                    | 6340         | protein_coding               |             |      |
| zinc finger protein 664                         | [Source:HGNC Symbol;Acc:HGNC:25406] |                                      |              |                              |             |      |
| zf-C2H2                                         | 2065                                | 2128                                 | 1812         | 1436                         | 1227        | 1374 |
| 15.74823963                                     | 14.62651846                         | 13.34181675                          | 12.58569566  |                              |             |      |
| 11.89604683                                     | 10.07693583                         |                                      |              |                              |             |      |
| ENSG00000143226                                 | 0                                   | 0                                    | 0            | 11.02069155                  | 20.60591278 |      |
| 0                                               | 0                                   | 10.54220144                          | -5.957679807 | 0.020828764                  |             |      |
| 1                                               | FCGR2A                              | 1                                    | 161505430    | 161524013                    | +           |      |
| 5314                                            | protein_coding                      | Fc fragment of IgG receptor IIa      |              |                              |             |      |
| [Source:HGNC Symbol;Acc:HGNC:3616]              | -                                   | 0                                    | 0            | 0                            | 0           |      |
| 10                                              | 17                                  | 0                                    | 0            | 0                            | 0.104566    |      |
| 0.196641298                                     | 0                                   |                                      |              |                              |             |      |
| ENSG00000204178                                 | 1276.38282                          | 1185.926406                          | 1188.12548   |                              |             |      |
| 1404.036104                                     | 1681.20006                          | 1548.161981                          | 1216.811569  |                              |             |      |
| 1544.466048                                     | -0.343897558                        | 0.020841144                          | 1            | MAC01                        | 1           |      |
| 25430858                                        | 25500209                            | +                                    | 3979         | protein_coding               |             |      |
| macoilin 1                                      | [Source:HGNC Symbol;Acc:HGNC:25572] |                                      |              |                              |             | -    |
| 1363                                            | 1277                                | 1274                                 | 1387         | 1677                         | 16.12494345 | 1327 |
| 14.92727434                                     | 14.98176546                         | 17.79129384                          | 21.42643324  |                              |             |      |
| 19.59702477                                     |                                     |                                      |              |                              |             |      |
| ENSG00000149781                                 | 538.6393213                         | 704.7691774                          | 530.3300892  |                              |             |      |
| 373.6014437                                     | 374.5427675                         | 479.1270531                          | 591.246196   |                              |             |      |
| 409.0904214                                     | 0.530429878                         | 0.020861475                          | 1            | FERMT3                       | 11          |      |
| 64206678                                        | 64223886                            | +                                    | 3066         | protein_coding               |             |      |
| fermitin family member 3                        | [Source:HGNC Symbol;Acc:HGNC:23151] |                                      |              |                              |             |      |
| -                                               | 560                                 | 810                                  | 570          | 339                          | 309         | 519  |
| 8.831146574                                     | 11.51254832                         | 8.678581395                          | 6.143835674  |                              |             |      |
| 6.194891282                                     | 7.87093318                          |                                      |              |                              |             |      |
| ENSG00000267395                                 | 0                                   | 23.49230591                          | 10.23444032  | 0                            | 0           |      |
| 0                                               | 11.24224874                         | 0                                    | 5.833844593  | 0.020916466                  |             |      |
| 1                                               | DM1-AS                              | 19                                   | 45767796     | 45772504                     | +           |      |
| 1027                                            | antisense                           | DM1 locus antisense RNA [Source:HGNC |              |                              |             |      |
| Symbol;Acc:HGNC:53125]                          | -                                   | 0                                    | 27           | 11                           | 0           | 0    |
| 0                                               | 0                                   | 1.145649891                          | 0.499998012  | 0                            | 0           |      |
| 0                                               |                                     |                                      |              |                              |             |      |
| ENSG00000207331                                 | 6.732991517                         | 13.92136647                          | 6.512825656  | 0                            |             |      |
| 0                                               | 0                                   | 9.05572788                           | 0            | 5.521360747                  |             |      |
| 0.020947665                                     | 1                                   | RNU6-1263P                           | 3            | 98908459                     |             |      |
| 98908564                                        | +                                   | 106                                  | snRNA        | "RNA, U6 small nuclear 1263, |             |      |
| pseudogene [Source:HGNC Symbol;Acc:HGNC:48226]" | -                                   | 7                                    | 16           |                              |             |      |
| 7                                               | 0                                   | 0                                    | 0            | 3.192959363                  | 6.577679601 |      |
| 3.08274932                                      | 0                                   | 0                                    | 0            |                              |             |      |
| ENSG00000215712                                 | 451.1104316                         | 527.271755                           | 452.1761813  |                              |             |      |
| 355.9683372                                     | 351.5126297                         | 271.4130127                          | 476.8527893  |                              |             |      |

|                        |                                                |                                     |             |                |      |             |
|------------------------|------------------------------------------------|-------------------------------------|-------------|----------------|------|-------------|
| 326.2979932            | 0.548939205                                    | 0.020948701                         | 1           | TMEM242        | 6    |             |
| 157289386              | 157323601                                      | -                                   | 4644        | protein_coding |      |             |
|                        | transmembrane protein 242                      | [Source:HGNC Symbol;Acc:HGNC:17206] |             |                |      |             |
| -                      | 469                                            | 606                                 | 486         | 323            | 290  | 294         |
| 4.882945175            | 5.686421011                                    | 4.885287128                         | 3.864758446 |                |      |             |
| 3.838425776            | 2.943649772                                    |                                     |             |                |      |             |
| ENSG0000090013         | 1122.485871                                    | 1374.734939                         | 1551.913314 |                |      |             |
| 1782.045824            | 1659.382035                                    | 1785.417574                         | 1349.711375 |                |      |             |
| 1742.281811            | -0.368348571                                   | 0.020972487                         | 1           | BLVRB          | 19   |             |
| 40447765               | 40465840                                       | -                                   | 1689        | protein_coding |      |             |
|                        | biliverdin reductase B                         | [Source:HGNC Symbol;Acc:HGNC:1063]  |             |                |      |             |
| -                      | 1167                                           | 1580                                | 1668        | 1617           | 1369 | 1934        |
| 33.40738045            | 40.76486751                                    | 46.10122149                         | 53.19764586 |                |      |             |
| 49.82200016            | 53.24242629                                    |                                     |             |                |      |             |
| ENSG0000168374         | 5136.310671                                    | 5049.105601                         | 4970.216379 |                |      |             |
| 6129.708642            | 6267.833822                                    | 5609.202263                         | 5051.877551 |                |      |             |
| 6002.248243            | -0.248530499                                   | 0.020981612                         | 0.183486337 | ARF4           |      |             |
| 3                      | 57571363                                       | 57598220                            | -           | 2595           |      |             |
| protein_coding         | ADP ribosylation factor 4                      | [Source:HGNC                        |             |                |      |             |
| Symbol;Acc:HGNC:655]   | -                                              | 5340                                | 5803        | 5342           | 5562 | 5171        |
| 6076                   | 99.49588316                                    | 97.44819654                         | 96.09760351 |                |      |             |
| 119.0983284            | 122.4854595                                    | 108.8708017                         |             |                |      |             |
| ENSG0000125743         | 3899.363944                                    | 4398.281718                         | 4734.824252 |                |      |             |
| 4890.982912            | 5599.959825                                    | 5351.636853                         | 4344.156638 |                |      |             |
| 5280.859863            | -0.281619981                                   | 0.020989763                         | 0.183486337 | SNRPD2         |      |             |
| 19                     | 45687454                                       | 45692569                            | -           | 1608           |      |             |
| protein_coding         | small nuclear ribonucleoprotein D2 polypeptide | [Source:HGNC Symbol;Acc:HGNC:11159] | -           | 4054           | 5055 | 5089        |
| 4438                   | 4620                                           | 5797                                | 121.8986558 | 136.9915291    |      |             |
| 147.7380772            | 153.3604228                                    | 176.6051205                         | 167.6286603 |                |      |             |
| ENSG0000259972         | 143.3165337                                    | 66.99657613                         | 107.9268252 |                |      |             |
| 56.20552693            | 50.90872568                                    | 24.92568484                         | 106.0799783 |                |      |             |
| 44.01331248            | 1.27303927                                     | 0.021069994                         | 1           | AC009120.2     |      |             |
| 16                     | 74305127                                       | 74335346                            | -           | 3297           |      |             |
| processed_transcript   | "novel transcript, antisense to PSMD7"         | -                                   |             |                |      |             |
| 149                    | 77                                             | 116                                 | 51          | 42             | 27   | 2.185086016 |
| 1.017724843            | 1.642423226                                    | 0.85953442                          | 0.783028742 |                |      |             |
| 0.380781495            |                                                |                                     |             |                |      |             |
| ENSG0000165118         | 276.0526522                                    | 283.6478418                         | 315.4068425 |                |      |             |
| 230.3324535            | 173.3320898                                    | 111.703995                          | 291.7024455 |                |      |             |
| 171.7895128            | 0.76607532                                     | 0.021085347                         | 1           | C9orf64        | 9    |             |
| 83938311               | 83956986                                       | -                                   | 2729        | protein_coding |      |             |
|                        | chromosome 9 open reading frame 64             | [Source:HGNC                        |             |                |      |             |
| Symbol;Acc:HGNC:28144] | -                                              | 287                                 | 326         | 339            | 209  | 143         |
| 121                    | 5.084866761                                    | 5.205622396                         | 5.798854319 |                |      |             |
| 4.255541147            | 3.220919435                                    | 2.061640099                         |             |                |      |             |
| ENSG0000147123         | 781.0270159                                    | 1130.24094                          | 1027.165646 |                |      |             |
| 1109.78364             | 1343.020668                                    | 1539.853419                         | 979.4778675 |                |      |             |
| 1330.885909            | -0.442384453                                   | 0.021118442                         | 1           | NDUFB11        | X    |             |
| 47142216               | 47145504                                       | -                                   | 1418        | protein_coding |      |             |

|                                                         |              |             |                   |                |                |             |
|---------------------------------------------------------|--------------|-------------|-------------------|----------------|----------------|-------------|
| NADH:ubiquinone oxidoreductase subunit B11 [Source:HGNC |              |             |                   |                |                |             |
| Symbol;Acc:HGNC:20372]                                  | -            | 812         | 1299              | 1104           | 1007           | 1108        |
| 1668                                                    | 27.68732604  | 39.92009057 |                   | 36.34451505    |                |             |
| 39.46074528                                             | 48.02981234  | 54.69540388 |                   |                |                |             |
| ENSG00000105640                                         | 26983.90629  | 26514.11252 |                   | 36185.25935    |                |             |
| 30904.22326                                             | 40093.0457   | 41892.69083 |                   | 29894.42605    |                |             |
| 37629.9866                                              | -0.332021633 | 0.0211211   |                   | 0.183486337    |                | RPL18A      |
| 19                                                      | 17859876     | 17864153    |                   | +              | 3527           |             |
| protein_coding ribosomal protein L18a [Source:HGNC      |              |             |                   |                |                |             |
| Symbol;Acc:HGNC:10311]                                  | -            | 28054       | 30473             | 38892          | 28042          | 33077       |
| 45379                                                   | 384.5834132  | 376.5029209 |                   | 514.7553313    |                |             |
| 441.7896823                                             | 576.4584555  | 598.2469315 |                   |                |                |             |
| ENSG00000276809                                         | 0            | 0           | 2.791210996       | 13.22482987    |                |             |
| 48.48450065                                             | 0            | 0.930403665 | 20.56977684       | -4.468013034   |                |             |
|                                                         | 0.021122457  | 1           | AL138955.1        | 13             | 95744726       |             |
|                                                         | 95745765     | +           | 1040              | sense_intronic | "novel         |             |
| transcript, sense intronic to DNAJC3"                   |              |             |                   |                |                |             |
|                                                         | 12           | 40          | 0                 | 0              | 0              | 3           |
|                                                         | 0.641150448  | 2.36414447  | 0                 |                |                |             |
| ENSG00000198920                                         | 920.4961259  | 789.1674616 |                   | 744.3229322    |                |             |
| 684.3849455                                             | 576.9655578  | 534.5174639 |                   | 817.9955066    |                |             |
| 598.6226557                                             | 0.450757486  | 0.021183169 |                   | 1              | KIAA0753       |             |
| 17                                                      | 6578148      | 6640927     | -                 | 6299           | protein_coding |             |
| KIAA0753 [Source:HGNC Symbol;Acc:HGNC:29110]            |              |             |                   |                |                |             |
|                                                         | 800          | 621         | 476               | 579            | 7.345841373    | 957 907     |
|                                                         | 5.92876743   | 5.478126232 |                   | 4.644967766    | 6.274718925    |             |
| ENSG00000166250                                         | 7217.766906  | 8256.240401 |                   | 7014.313232    |                |             |
| 6349.020404                                             | 6420.559999  | 6049.556029 |                   | 7496.106846    |                |             |
| 6273.045477                                             | 0.257104131  | 0.021186875 |                   | 0.183486337    |                | CLMP        |
| 11                                                      | 123069865    | 123195281   |                   | -              | 5097           |             |
| protein_coding CXADR like membrane protein [Source:HGNC |              |             |                   |                |                |             |
| Symbol;Acc:HGNC:24039]                                  | -            | 7504        | 9489              | 7539           | 5761           | 5297        |
| 6553                                                    | 71.18351154  | 81.12681214 |                   | 69.04705274    |                |             |
| 62.80515406                                             | 63.87967524  | 59.78008834 |                   |                |                |             |
| ENSG00000278920                                         | 19.23711862  | 1.740170808 |                   | 7.443229322    |                | 0           |
| 0                                                       | 0            | 9.47350625  | 0                 | 5.584484916    |                |             |
| 0.021229862                                             | 1            | AC005005.4  | 22                | 31051630       |                |             |
| 31068327                                                | +            | 16698       | sense_overlapping | "novel         |                |             |
| transcript, sense overlapping SMTN"                     |              |             |                   |                |                |             |
|                                                         | 0            | 0           | 0                 | 0.057911759    | 0.005219443    | 8           |
|                                                         | 0.022365137  | 0           | 0                 |                |                |             |
| ENSG00000269713                                         | 1478.372566  | 1502.637493 |                   | 1201.151132    |                |             |
| 897.0842925                                             | 1066.659014  | 1201.971914 |                   | 1394.05373     |                |             |
| 1055.238407                                             | 0.40126921   | 0.021238688 |                   | 1              | NBPF9          | 1           |
| 149054027                                               | 149103561    | -           |                   | 9046           | protein_coding |             |
| NBPF member 9 [Source:HGNC Symbol;Acc:HGNC:31991]       |              |             |                   |                |                |             |
| 1537                                                    | 1727         | 1291        | 814               | 880            | 1302           | 8.215206805 |
| 8.319444941                                             | 6.662169758  | 5.000113528 |                   | 5.979618116    |                |             |
| 6.692454372                                             |              |             |                   |                |                |             |
| ENSG00000148219                                         | 96.18559309  | 77.43760098 |                   | 83.73632987    |                |             |

|                 |                                                                    |                      |                       |                |      |                |      |      |      |      |      |
|-----------------|--------------------------------------------------------------------|----------------------|-----------------------|----------------|------|----------------|------|------|------|------|------|
| 51.7972503      | 30.30281291                                                        | 18.46347025          | 85.78650798           |                |      |                |      |      |      |      |      |
| 33.52117782     | 1.359368035                                                        | 0.02126347           | 1                     | ASTN2          | 9    |                |      |      |      |      |      |
| 116425225       | 117415070                                                          | -                    | 8290                  | protein_coding |      |                |      |      |      |      |      |
|                 | astrotactin 2 [Source:HGNC Symbol;Acc:HGNC:17021]                  |                      |                       |                |      | -              |      |      |      |      |      |
| 100             | 89                                                                 | 90                   | 47                    | 25             | 20   | 0.583239174    |      |      |      |      |      |
| 0.46783647      | 0.506796976                                                        | 0.315032508          | 0.185367178           |                |      |                |      |      |      |      |      |
| 0.112177688     |                                                                    |                      |                       |                |      |                |      |      |      |      |      |
| ENSG00000178201 | 57.71135586                                                        | 47.85469723          | 66.98906389           |                |      |                |      |      |      |      |      |
| 27.55172889     | 18.18168774                                                        | 5.539041076          | 57.51837233           |                |      |                |      |      |      |      |      |
| 17.09081924     | 1.758877825                                                        | 0.021329859          | 1                     | VN1R1          | 19   |                |      |      |      |      |      |
| 57454790        | 57457142                                                           | -                    | 2353                  | protein_coding |      |                |      |      |      |      |      |
|                 | vomeronasal 1 receptor 1 [Source:HGNC Symbol;Acc:HGNC:13548]       |                      |                       |                |      |                |      |      |      |      |      |
| -               | 60                                                                 | 55                   | 72                    | 25             | 15   | 6              |      |      |      |      |      |
| 1.232907628     | 1.018589887                                                        | 1.428422246          | 0.590377945           |                |      |                |      |      |      |      |      |
| 0.39184715      | 0.118566047                                                        |                      |                       |                |      |                |      |      |      |      |      |
| ENSG00000167325 | 1754.425218                                                        | 2383.163922          | 2113.877127           |                |      |                |      |      |      |      |      |
| 3635.726144     | 2646.041623                                                        | 2139.916203          | 2083.822089           |                |      |                |      |      |      |      |      |
| 2807.22799      | -0.429540982                                                       | 0.021358335          | 0.18410283            |                |      | RRM1           |      |      |      |      |      |
| 11              | 4094707                                                            | 4138876              | +                     | 4177           |      | protein_coding |      |      |      |      |      |
|                 | ribonucleotide reductase catalytic subunit M1 [Source:HGNC         |                      |                       |                |      |                |      |      |      |      |      |
|                 | Symbol;Acc:HGNC:10451]                                             |                      |                       |                |      | -              | 1824 | 2739 | 2272 | 3299 | 2183 |
| 2318            | 21.11356527                                                        | 28.57499445          | 25.39158946           |                |      |                |      |      |      |      |      |
| 43.8863926      | 32.12451803                                                        | 25.8035806           |                       |                |      |                |      |      |      |      |      |
| ENSG00000112159 | 2937.508013                                                        | 1763.663114          | 2483.247382           |                |      |                |      |      |      |      |      |
| 1974.907927     | 1593.927959                                                        | 1811.266432          | 2394.80617            |                |      |                |      |      |      |      |      |
| 1793.367439     | 0.416883382                                                        | 0.021391097          | 1                     | MDN1           | 6    |                |      |      |      |      |      |
| 89642499        | 89819723                                                           | -                    | 18602                 | protein_coding |      |                |      |      |      |      |      |
|                 | midasin AAA ATPase 1 [Source:HGNC Symbol;Acc:HGNC:18302]           |                      |                       |                |      |                |      |      |      |      |      |
| -               | 3054                                                               | 2027                 | 2669                  | 1792           | 1315 | 1962           |      |      |      |      |      |
| 7.937991128     | 4.748459152                                                        | 6.697843097          | 5.352915761           |                |      |                |      |      |      |      |      |
| 4.345237041     | 4.904224935                                                        |                      |                       |                |      |                |      |      |      |      |      |
| ENSG00000231942 | 23.08454234                                                        | 10.44102485          | 0                     | 0              | 0    |                |      |      |      |      |      |
| 0               | 11.17518906                                                        | 0                    | 5.823631852           | 0.021427703    |      |                |      |      |      |      |      |
| 1               | HNRNPA1P36                                                         | 8                    | 81807772              | 81808726       |      |                |      |      |      |      |      |
| +               | 955                                                                | processed_pseudogene | heterogeneous nuclear |                |      |                |      |      |      |      |      |
|                 | ribonucleoprotein A1 pseudogene 36 [Source:HGNC                    |                      |                       |                |      |                |      |      |      |      |      |
|                 | Symbol;Acc:HGNC:48765]                                             |                      |                       |                |      | -              | 24   | 12   | 0    | 0    | 0    |
| 0               | 1.21509179                                                         | 0.547565998          | 0                     | 0              | 0    | 0              |      |      |      |      |      |
| 0               |                                                                    |                      |                       |                |      |                |      |      |      |      |      |
| ENSG00000166913 | 8127.682616                                                        | 8682.582249          | 8196.85629            |                |      |                |      |      |      |      |      |
| 10609.61976     | 10319.92596                                                        | 8900.315836          | 8335.707052           |                |      |                |      |      |      |      |      |
| 9943.287186     | -0.254270761                                                       | 0.021465078          | 0.184158335           |                |      | YWHAB          |      |      |      |      |      |
| 20              | 44885676                                                           | 44908532             | +                     | 7933           |      |                |      |      |      |      |      |
|                 | protein_coding tyrosine 3-monooxygenase/tryptophan 5-monooxygenase |                      |                       |                |      |                |      |      |      |      |      |
|                 | activation protein beta [Source:HGNC Symbol;Acc:HGNC:12849]        |                      |                       |                |      | -              |      |      |      |      |      |
| 8450            | 9979                                                               | 8810                 | 9627                  | 8514           | 9641 | 51.50157032    |      |      |      |      |      |
| 54.8161041      | 51.84232734                                                        | 67.43192553          | 65.96955458           |                |      |                |      |      |      |      |      |
| 56.50874299     |                                                                    |                      |                       |                |      |                |      |      |      |      |      |
| ENSG00000110066 | 1389.88182                                                         | 1505.247749          | 1259.766563           |                |      |                |      |      |      |      |      |
| 1099.865017     | 1126.052528                                                        | 1025.645773          | 1384.965377           |                |      |                |      |      |      |      |      |

|                                                                  |              |             |                      |                |      |      |
|------------------------------------------------------------------|--------------|-------------|----------------------|----------------|------|------|
| 1083.854439                                                      | 0.354142254  | 0.021470371 | 1                    | KMT5B          | 11   |      |
| 68154863                                                         | 68213828     | -           | 8632                 | protein_coding |      |      |
| lysine methyltransferase 5B [Source:HGNC                         |              |             |                      |                |      |      |
| Symbol;Acc:HGNC:24283]                                           | -            | 1445        | 1730                 | 1354           | 998  | 929  |
| 1111                                                             | 8.093896226  | 8.733599435 | 7.322396951          |                |      |      |
| 6.424378992                                                      | 6.615331966  | 5.984579566 |                      |                |      |      |
| ENSG00000236896                                                  | 0            | 17.40170808 | 15.81686231          | 0              | 0    |      |
| 0                                                                | 11.0728568   | 0           | 5.811584977          | 0.021510882    |      |      |
| 1                                                                | AL354726.1   | 9           | 97986551             | 97987656       |      |      |
| -                                                                | 402          | antisense   | novel transcript     | -              |      |      |
| 0                                                                | 20           | 17          | 0                    | 0              | 0    |      |
| 2.168016286                                                      | 1.974098889  | 0           | 0                    | 0              |      |      |
| ENSG00000112312                                                  | 576.1517026  | 692.5879818 | 576.8502724          |                |      |      |
| 998.4746548                                                      | 837.5697488  | 708.9972578 | 615.1966523          |                |      |      |
| 848.3472205                                                      | -0.4628029   | 0.021519291 | 1                    | GMNN           | 6    |      |
| 24774931                                                         | 24786099     | +           | 2476                 | protein_coding |      |      |
| "geminin, DNA replication inhibitor [Source:HGNC                 |              |             |                      |                |      |      |
| Symbol;Acc:HGNC:17493]"                                          | -            | 599         | 796                  | 620            | 906  | 691  |
| 768                                                              | 11.69707834  | 14.00944805 | 11.68926179          |                |      |      |
| 20.33244476                                                      | 17.15436977  | 14.42253488 |                      |                |      |      |
| ENSG00000144711                                                  | 1262.916837  | 1199.847772 | 1284.887462          |                |      |      |
| 1001.780862                                                      | 899.3874871  | 1026.568946 | 1249.217357          |                |      |      |
| 975.9124318                                                      | 0.355633734  | 0.021580221 | 1                    | IQSEC1         | 3    |      |
| 12897220                                                         | 13283281     | -           | 8550                 | protein_coding |      |      |
| IQ motif and Sec7 domain 1 [Source:HGNC Symbol;Acc:HGNC:29112]   |              |             |                      |                |      |      |
| -                                                                | 1313         | 1379        | 1381                 | 909            | 742  | 1112 |
| 7.425057614                                                      | 7.028404517  | 7.54003913  | 5.907582729          |                |      |      |
| 5.33439475                                                       | 6.047413856  |             |                      |                |      |      |
| ENSG00000147133                                                  | 1788.090176  | 1549.622105 | 1858.016119          |                |      |      |
| 1383.09679                                                       | 1306.657293  | 1429.072598 | 1731.909467          |                |      |      |
| 1372.942227                                                      | 0.334670546  | 0.021598995 | 1                    | TAF1           | X    |      |
| 71366239                                                         | 71532374     | +           | 10860                | protein_coding |      |      |
| TATA-box binding protein associated factor 1 [Source:HGNC        |              |             |                      |                |      |      |
| Symbol;Acc:HGNC:11535]                                           | -            | 1859        | 1781                 | 1997           | 1255 | 1078 |
| 1548                                                             | 8.276577404  | 7.146488381 | 8.584090259          |                |      |      |
| 6.421344117                                                      | 6.101495507  | 6.627842037 |                      |                |      |      |
| ENSG00000129255                                                  | 2164.175845  | 2025.558821 | 1828.243202          |                |      |      |
| 2257.03763                                                       | 2573.314872  | 2655.047023 | 2005.992623          |                |      |      |
| 2495.133175                                                      | -0.314948811 | 0.021692736 | 1                    | MPDU1          | 17   |      |
| 7583529                                                          | 7592789      | +           | 3270                 | protein_coding |      |      |
| dolichol utilization defect 1 [Source:HGNC Symbol;Acc:HGNC:7207] |              |             |                      |                |      |      |
| -                                                                | 2250         | 2328        | 1965                 | 2048           | 2123 | 2876 |
| 33.26871158                                                      | 31.02371635  | 28.05180672 | 34.80120192          |                |      |      |
| 39.90704785                                                      | 40.89518218  |             |                      |                |      |      |
| ENSG00000235286                                                  | 8.656703379  | 8.700854042 | 9.304036652          | 0              |      |      |
| 0                                                                | 0            | 8.887198024 | 0                    | 5.493573515    |      |      |
| 0.021723174                                                      | 1            | AP000925.1  | 11                   | 111670956      |      |      |
| 111672404                                                        | -            | 1449        | processed_pseudogene | keratin        | 8    |      |
| (KRT8) pseudogene                                                | -            | 9           | 10                   | 10             | 0    | 0    |
| 0                                                                | 0.300313835  | 0.300739319 | 0.322164476          | 0              |      |      |

|                                     |                         |                        |                       |             |                        |                |       |
|-------------------------------------|-------------------------|------------------------|-----------------------|-------------|------------------------|----------------|-------|
| 0                                   | 0                       |                        |                       |             |                        |                |       |
| ENSG00000126001                     | 2675.8832               |                        | 1707.977649           |             | 2168.770944            |                |       |
| 1535.182333                         | 1461.807695             |                        | 1917.431386           |             | 2184.210597            |                |       |
| 1638.140471                         | 0.414335577             |                        | 0.021780769           |             | 1                      | CEP250         | 20    |
| 35455164                            | 35519280                |                        | +                     |             | 16295                  | protein_coding |       |
|                                     | centrosomal protein 250 |                        | [Source:HGNC          |             | Symbol;Acc:HGNC:1859]  |                |       |
| -                                   | 2782                    | 1963                   | 2331                  | 1393        | 1206                   | 2077           |       |
| 8.254750996                         | 5.249579687             |                        | 6.677808253           |             | 4.750166093            |                |       |
| 4.549255232                         | 5.926702802             |                        |                       |             |                        |                |       |
| ENSG00000166669                     | 15.3896949              |                        | 6.09059783            |             | 5.582421991            |                | 0     |
| 0                                   | 0                       | 9.020904905            | 0                     |             | 5.514430929            |                |       |
| 0.021789817                         | 1                       | ATF7IP2                | 16                    | 10326434    |                        | 10483638       |       |
| +                                   | 6391                    | protein_coding         | activating            |             | transcription          |                |       |
| factor 7 interacting protein 2      |                         | [Source:HGNC           |                       |             | Symbol;Acc:HGNC:20397] |                |       |
| -                                   | 16                      | 7                      | 6                     | 0           | 0                      | 0              |       |
| 0.12104654                          | 0.047729603             |                        | 0.04382566            |             | 0                      | 0              | 0     |
| ENSG00000214425                     | 376.085669              |                        | 190.5487035           |             | 315.4068425            |                |       |
| 214.9034853                         | 143.0292769             |                        | 151.4004561           |             | 294.0137383            |                |       |
| 169.7777394                         | 0.791729881             |                        | 0.02183683            |             | 1                      | LRRC37A4P      |       |
| 17                                  | 45506741                |                        | 45550335              |             | -                      | 6924           |       |
| transcribed_unprocessed_pseudogene  |                         |                        | "leucine rich repeat  |             |                        |                |       |
| containing 37 member A4, pseudogene |                         |                        | [Source:HGNC          |             |                        |                |       |
| Symbol;Acc:HGNC:25479]"             | -                       | 391                    | 219                   | 339         | 195                    | 118            |       |
| 164                                 | 2.730366298             |                        | 1.378306021           |             | 2.285539202            |                |       |
| 1.564910829                         | 1.047544083             |                        | 1.101330856           |             |                        |                |       |
| ENSG00000175166                     | 13439.05107             |                        | 11920.17004           |             | 11742.62466            |                |       |
| 14142.85347                         | 14431.41162             |                        | 15186.20428           |             | 12367.28192            |                |       |
| 14586.82313                         | -0.23819801             |                        | 0.021851674           |             | 0.186367697            |                | PSMD2 |
| 3                                   | 184298709               |                        | 184309054             |             | +                      | 5453           |       |
| protein_coding                      | "proteasome 26S         |                        | subunit, non-ATPase 2 |             | [Source:HGNC           |                |       |
| Symbol;Acc:HGNC:9559]"              | -                       | 13972                  | 13700                 | 12621       | 12833                  | 11906          |       |
| 16450                               | 123.8865891             |                        | 109.4822382           |             | 108.0449082            |                |       |
| 130.7689812                         | 134.2077949             |                        | 140.2689102           |             |                        |                |       |
| ENSG00000267405                     | 14.42783896             |                        | 3.480341617           |             | 9.304036652            |                | 0     |
| 0                                   | 0                       | 9.070739078            | 0                     |             | 5.522156096            |                |       |
| 0.021859805                         | 1                       | AC005180.1             | 17                    |             | 44794747               |                |       |
| 44797783                            | -                       | 587                    | lincRNA               | novel       | transcript             |                | -     |
| 15                                  | 4                       | 10                     | 0                     | 0           | 0                      | 1.235533071    |       |
| 0.296948057                         | 0.795257795             |                        | 0                     | 0           | 0                      |                |       |
| ENSG00000185860                     | 0                       | 26.10256213            | 7.443229322           |             | 0                      | 0              |       |
| 0                                   | 11.18193048             |                        | 0                     | 5.82624182  | 0.021925691            |                |       |
| 1                                   | CCDC190                 | 1                      | 162824458             |             | 162868815              |                | -     |
| 4316                                | protein_coding          | coiled-coil            | domain                | containing  | 190                    |                |       |
| [Source:HGNC                        |                         | Symbol;Acc:HGNC:28736] | -                     | 0           | 30                     | 8              |       |
| 0                                   | 0                       | 0                      | 0                     | 0.302899402 | 0.086527586            |                |       |
| 0                                   | 0                       | 0                      |                       |             |                        |                |       |
| ENSG00000075407                     | 814.6919735             |                        | 616.8905516           |             | 666.1690243            |                |       |
| 569.7697534                         | 456.9664186             |                        | 475.4343591           |             | 699.2505165            |                |       |
| 500.7235104                         | 0.481513234             |                        | 0.02192924            |             | 1                      | ZNF37A         | 10    |
| 38094334                            | 38150293                |                        | +                     |             | 13190                  | protein_coding |       |



|                 |                                                               |              |                |             |                             |                    |
|-----------------|---------------------------------------------------------------|--------------|----------------|-------------|-----------------------------|--------------------|
|                 | zinc finger protein 37A [Source:HGNC Symbol;Acc:HGNC:13102]   |              |                |             |                             |                    |
|                 | zf-C2H2                                                       | 847          | 709            | 716         | 517                         | 377 515            |
| 3.104844336     |                                                               | 2.342394488  |                | 2.534044648 |                             | 2.177999578        |
| 1.756887346     |                                                               | 1.815488288  |                |             |                             |                    |
| ENSG00000147439 |                                                               | 537.6774654  |                | 475.9367161 |                             | 507.0699975        |
| 318.4979859     |                                                               | 313.9371417  |                | 418.1976013 |                             | 506.8947263        |
| 350.2109096     |                                                               | 0.531712698  |                | 0.021957576 |                             | 1 BIN3 8           |
|                 | 22620418                                                      |              | 22669148       | -           | 5080                        | protein_coding     |
|                 | bridging integrator 3 [Source:HGNC Symbol;Acc:HGNC:1054]      |              |                |             |                             |                    |
|                 | -                                                             | 559          | 547            | 545         | 289                         | 259 453            |
| 5.320461588     |                                                               | 4.692261548  |                | 5.008167272 |                             | 3.161157789        |
| 3.133887571     |                                                               | 4.146345695  |                |             |                             |                    |
| ENSG00000233276 |                                                               | 5753.822179  |                | 6447.332845 |                             | 6796.598774        |
| 7009.159828     |                                                               | 7444.795075  |                | 8593.82223  |                             | 6332.5846          |
| 7682.592378     |                                                               | -0.278915146 |                | 0.021962535 |                             | 0.186367697 GPX1   |
|                 | 3                                                             | 49357171     |                | 49358600    |                             | - 1430             |
|                 | polymorphic_pseudogene glutathione peroxidase 1 [Source:HGNC  |              |                |             |                             |                    |
|                 | Symbol;Acc:HGNC:4553]                                         |              |                |             |                             |                    |
|                 | -                                                             |              | 5982           | 7410        | 7305                        | 6360 6142          |
|                 | 9309                                                          | 202.2607381  |                | 225.8087508 |                             | 238.46806          |
| 247.1343547     |                                                               | 264.0104606  |                | 302.6899565 |                             |                    |
| ENSG00000111215 |                                                               | 7.694847448  |                | 5.220512425 |                             | 13.95605498 0      |
|                 | 0                                                             | 0            | 8.957138284    | 0           | 5.504543031                 |                    |
| 0.022021653     |                                                               | 1            | PRR4           | 12          | 10845849                    | 10849475           |
|                 | -                                                             | 1310         | protein_coding |             | proline rich 4 [Source:HGNC |                    |
|                 | Symbol;Acc:HGNC:18020]                                        |              |                |             |                             |                    |
|                 | -                                                             | 8            | 6              | 15          | 0                           | 0                  |
|                 | 0                                                             | 0.295270397  |                | 0.199589896 |                             | 0.53452251 0       |
|                 | 0                                                             | 0            |                |             |                             |                    |
| ENSG00000161547 |                                                               | 4266.79291   |                | 4539.235554 |                             | 4451.981538        |
| 4667.262873     |                                                               | 5678.747139  |                | 5737.523382 |                             | 4419.336667        |
| 5361.177798     |                                                               | -0.278743611 |                | 0.02210035  |                             | 0.186367697 SRSF2  |
|                 | 17                                                            | 76734115     |                | 76737374    |                             | - 3017             |
|                 | protein_coding serine and arginine rich splicing factor 2     |              |                |             |                             |                    |
|                 | [Source:HGNC Symbol;Acc:HGNC:10783]                           |              |                |             |                             |                    |
|                 | -                                                             |              |                | 4436        | 5217                        | 4785               |
|                 | 4235                                                          | 4685         | 6215           | 71.0914617  | 75.35362062                 |                    |
| 74.0376572      |                                                               | 77.99919996  |                | 95.45125552 |                             | 95.78485385        |
| ENSG00000135926 |                                                               | 2521.986251  |                | 3170.591213 |                             | 3107.548242        |
| 3580.622686     |                                                               | 3830.275552  |                | 3448.05307  |                             | 2933.375235        |
| 3619.650436     |                                                               | -0.303011831 |                | 0.022128626 |                             | 0.186367697 TMBIM1 |
|                 | 2                                                             | 218274192    |                | 218292586   |                             | - 5098             |
|                 | protein_coding transmembrane BAX inhibitor motif containing 1 |              |                |             |                             |                    |
|                 | [Source:HGNC Symbol;Acc:HGNC:23410]                           |              |                |             |                             |                    |
|                 | -                                                             |              |                | 2622        | 3644                        | 3340               |
|                 | 3249                                                          | 3160         | 3735           | 24.86761143 | 31.14849982                 |                    |
| 30.58388637     |                                                               | 35.41293513  |                | 38.10084536 |                             | 34.06605107        |
| ENSG00000197124 |                                                               | 0.961855931  |                | 0           | 0                           | 48.49104284 0      |
|                 | 0                                                             | 0.320618644  |                | 16.16368095 |                             | -5.61524539        |
| 0.022158596     |                                                               | 1            | ZNF682         | 19          | 19997058                    | 20039506           |
|                 | -                                                             | 4968         | protein_coding |             | zinc finger protein 682     |                    |
|                 | [Source:HGNC Symbol;Acc:HGNC:28857]                           |              |                |             |                             |                    |
|                 | -                                                             |              | zf-C2H2        | 1           | 0                           | 0                  |
|                 | 44                                                            | 0            | 0              | 0.009732393 | 0                           | 0                  |
| 0.492133731     |                                                               | 0            |                | 0           |                             |                    |

|                                                                   |              |             |                              |                |             |      |
|-------------------------------------------------------------------|--------------|-------------|------------------------------|----------------|-------------|------|
| ENSG00000243927                                                   | 1237.908583  | 1315.569131 | 1411.42236                   |                |             |      |
| 1713.717537                                                       | 1878.7744    | 1470.615406 | 1321.633358                  |                |             |      |
| 1687.702448                                                       | -0.352108659 | 0.022194249 | 1                            | MRPS6          | 21          |      |
| 34073224                                                          | 34143034     | +           | 4299                         | protein_coding |             |      |
| mitochondrial ribosomal protein S6 [Source:HGNC                   |              |             |                              |                |             |      |
| Symbol;Acc:HGNC:14051]                                            | -            | 1287        | 1512                         | 1517           | 1555        | 1550 |
| 1593                                                              | 14.47479155  | 15.32649839 | 16.47267657                  |                |             |      |
| 20.09902507                                                       | 22.16213588  | 17.22976479 |                              |                |             |      |
| ENSG00000146197                                                   | 64.44434737  | 32.19315996 | 55.82421991                  | 0              |             |      |
| 14.5453502                                                        | 17.54029674  | 50.82057575 | 10.69521565                  |                |             |      |
| 2.243275234                                                       | 0.022227477  | 1           | SCUBE3                       | 6              |             |      |
| 35214419                                                          | 35253079     | +           | 7356                         |                |             |      |
| protein_coding "signal peptide, CUB domain and EGF like domain    |              |             |                              |                |             |      |
| containing 3 [Source:HGNC Symbol;Acc:HGNC:13655]"                 |              |             |                              |                |             |      |
|                                                                   | -            |             |                              |                | 67          |      |
| 37                                                                | 60           | 0           | 12                           | 19             | 0.440386806 |      |
| 0.219188922                                                       | 0.380763724  | 0           | 0.100273664                  | 0.12009997     |             |      |
| ENSG00000246225                                                   | 0            | 0           | 17.63310649                  | 0              |             |      |
| 12.92442918                                                       | 0            | 10.18584522 | -5.91337538                  | 0.022242866    |             |      |
| 1                                                                 | AC006299.1   | 11          | 22829380                     | 22945393       |             |      |
| +                                                                 | 2421         | antisense   | "novel transcript, antisense |                |             |      |
| to SVIP"                                                          | -            | 0           | 0                            | 0              | 16          | 0    |
| 0                                                                 | 0            | 0           | 0.367229226                  | 0              | 0.268883569 |      |
| ENSG00000183696                                                   | 1228.290024  | 1031.051204 | 1098.806729                  |                |             |      |
| 1320.278848                                                       | 1506.655858  | 1462.306844 | 1119.382652                  |                |             |      |
| 1429.747183                                                       | -0.353216851 | 0.022257879 | 1                            | UPP1           | 7           |      |
| 48088628                                                          | 48108733     | +           | 4577                         | protein_coding |             |      |
| uridine phosphorylase 1 [Source:HGNC Symbol;Acc:HGNC:12576]       |              |             |                              |                |             |      |
| -                                                                 | 1277         | 1185        | 1181                         | 1198           | 1243        | 1584 |
| 13.48997676                                                       | 11.28225823  | 12.04522789 | 14.54413675                  |                |             |      |
| 16.69312235                                                       | 16.09182433  |             |                              |                |             |      |
| ENSG00000130518                                                   | 202.9516014  | 119.2017004 | 98.62278851                  |                |             |      |
| 22.04138311                                                       | 103.0295639  | 46.15867564 | 140.2586968                  |                |             |      |
| 57.07654088                                                       | 1.301080801  | 0.022287498 | 1                            | IQCN           | 19          |      |
| 18257097                                                          | 18274509     | -           | 9154                         | protein_coding |             |      |
| IQ motif containing N [Source:HGNC Symbol;Acc:HGNC:29350]         |              |             |                              |                |             |      |
| -                                                                 | 211          | 137         | 106                          | 20             | 85          | 50   |
| 1.114481243                                                       | 0.652181172  | 0.540556374 | 0.121403479                  |                |             |      |
| 0.570762429                                                       | 0.2539745    |             |                              |                |             |      |
| ENSG00000197771                                                   | 3225.102936  | 3410.734785 | 3165.233269                  |                |             |      |
| 4184.556583                                                       | 3966.032153  | 3659.459804 | 3267.023663                  |                |             |      |
| 3936.682847                                                       | -0.268793747 | 0.022366025 | 0.186789966                  | MCMBP          |             |      |
| 10                                                                | 119829404    | 119892556   | -                            | 6000           |             |      |
| protein_coding minichromosome maintenance complex binding protein |              |             |                              |                |             |      |
| [Source:HGNC Symbol;Acc:HGNC:25782]                               |              |             |                              |                |             |      |
|                                                                   | -            |             | 3353                         | 3920           | 3402        |      |
| 3797                                                              | 3272         | 3964        | 27.01988645                  | 28.47038987    |             |      |
| 26.46848566                                                       | 35.16425254  | 33.52041639 | 30.71944842                  |                |             |      |
| ENSG00000149485                                                   | 5233.45812   | 4541.84581  | 5491.242432                  |                |             |      |
| 10895.05567                                                       | 8593.877741  | 5167.002151 | 5088.848787                  |                |             |      |
| 8218.645187                                                       | -0.691509001 | 0.02238224  | 0.186789966                  | FADS1          |             |      |
| 11                                                                | 61799625     | 61829318    | -                            | 10230          |             |      |

protein\_coding fatty acid desaturase 1 [Source:HGNC  
 Symbol;Acc:HGNC:3574] - 5441 5220 5902 9886 7090  
 5597 25.71605279 22.23583625 26.93206211  
 53.69786467 42.60082029 25.43962419  
 ENSG00000172296 630.9774907 464.6256059 374.0222734  
 469.4814602 192.7258901 169.8639263 489.8751233  
 277.3570922 0.821208016 0.022386786 1 SPTLC3 20  
 13008979 13169103 + 8520 protein\_coding  
 serine palmitoyltransferase long chain base subunit 3  
 [Source:HGNC Symbol;Acc:HGNC:16253] - 656 534 402  
 426 159 184 3.722763619 2.731242489  
 2.202584071 2.77831861 1.147109535 1.004174633  
 ENSG00000204580 934.9239649 948.3930906 1114.623591  
 627.0773494 823.0243986 786.5438328 999.3135488  
 745.548527 0.422651191 0.022396599 1 DDR1 6  
 30876421 30900156 + 9122 protein\_coding  
 discoidin domain receptor tyrosine kinase 1 [Source:HGNC  
 Symbol;Acc:HGNC:2730] - 972 1090 1198 569 679  
 852 5.152018496 5.207089324 6.130738413  
 3.466045361 4.575378916 4.342907156  
 ENSG00000177000 1128.257007 856.1640378 815.9640144  
 577.4842374 766.0551103 689.610614 933.4616864  
 677.7166539 0.461968181 0.02240556 1 MTHFR 1  
 11785723 11806920 - 11978 protein\_coding  
 methylenetetrahydrofolate reductase [Source:HGNC  
 Symbol;Acc:HGNC:7436] - 1173 984 877 524 632  
 747 4.734944794 3.57988757 3.417915491  
 2.43085482 3.243247782 2.899795097  
 ENSG00000137100 739.6672109 747.4033622 853.180161  
 1005.08707 1035.144089 1003.489608 780.083578  
 1014.573589 -0.379101227 0.02253093 1 DCTN3 9  
 34613545 34620523 - 3740 protein\_coding  
 dynactin subunit 3 [Source:HGNC Symbol;Acc:HGNC:2713] -  
 769 859 917 912 854 1087 9.941592418  
 10.00875733 11.44573718 13.54987472 14.03568551  
 13.514157  
 ENSG00000032389 218.3412963 203.5999846 200.9671917  
 273.3131505 315.1492542 376.6547932 207.6361575  
 321.7057327 -0.632697585 0.022541077 1 EIPR1 2  
 3188925 3377882 - 5775 protein\_coding EARP complex  
 and GARP complex interacting protein 1 [Source:HGNC  
 Symbol;Acc:HGNC:12383] - 227 234 216 248 260  
 408 1.900531557 1.765722563 1.746014309  
 2.386226893 2.767379501 3.285028885  
 ENSG00000204959 23.08454234 12.18119566 11.16484398  
 1.102069155 2.424225033 0 15.47686066 1.175431396  
 3.771538086 0.022541959 1 ARHGEF34P 7  
 144272445 144286966 - 4532  
 unprocessed\_pseudogene "Rho guanine nucleotide exchange factor 34,  
 pseudogene [Source:HGNC Symbol;Acc:HGNC:38086]" - 24 14

|                                                               |              |             |                          |             |                |
|---------------------------------------------------------------|--------------|-------------|--------------------------|-------------|----------------|
| 12                                                            | 1            | 2           | 0                        | 0.256048689 | 0.134616016    |
| 0.123605382                                                   |              | 0.012260894 |                          | 0.027126106 | 0              |
| ENSG00000132394                                               | 1200.396202  |             | 1187.666577              | 1175.099829 |                |
| 1259.665045                                                   | 1624.230772  |             | 1731.87351               | 1187.720869 |                |
| 1538.589775                                                   | -0.373686643 |             | 0.022570969              | 1           | EEFSEC 3       |
| 128153454                                                     | 128408646    |             | +                        | 2421        | protein_coding |
| "eukaryotic elongation factor, selenocysteine-tRNA specific   |              |             |                          |             |                |
| [Source:HGNC Symbol;Acc:HGNC:24614]" -                        |              |             |                          |             |                |
|                                                               |              |             |                          | 1248        | 1365 1263      |
| 1143                                                          | 1340         | 1876        | 24.92418765              | 24.56950799 |                |
| 24.35311934                                                   | 26.23393781  |             | 34.02180642              | 36.03039827 |                |
| ENSG00000260306                                               | 22.12268641  |             | 4.350427021              | 1.86080733  | 0              |
| 0                                                             | 0            | 9.444640254 | 0                        | 5.580213536 |                |
| 0.022582393                                                   | 1            | AC092375.2  | 16                       | 21794095    |                |
| 21795759                                                      | -            | 1665        | lincRNA novel transcript |             | -              |
| 23                                                            | 5            | 2           | 0                        | 0           | 0.667905185    |
| 0.130862244                                                   |              | 0.056074033 | 0                        | 0           | 0              |
| ENSG00000132613                                               | 692.5362703  |             | 853.5537816              | 726.6452625 |                |
| 531.1973329                                                   | 623.0258334  |             | 512.3612996              | 757.5784381 |                |
| 555.5281553                                                   | 0.448607869  |             | 0.022684933              | 1           | MTSS1L 16      |
| 70661204                                                      | 70686066     |             | -                        | 4999        | protein_coding |
| "MTSS1L, I-BAR domain containing [Source:HGNC                 |              |             |                          |             |                |
| Symbol;Acc:HGNC:25094]" -                                     |              |             |                          |             |                |
|                                                               |              |             | 720                      | 981         | 781 482 514    |
| 555                                                           | 6.963868733  |             | 8.551542695              | 7.293129631 |                |
| 5.357669814                                                   | 6.320149369  |             | 5.162271771              |             |                |
| ENSG00000258976                                               | 82.71961006  |             | 96.57947987              | 78.15390788 |                |
| 3.306207466                                                   | 42.42393807  |             | 35.08059348              | 85.81766594 |                |
| 26.93691301                                                   | 1.672155666  |             | 0.022689647              | 1           | AC013451.2     |
| 14                                                            | 74614693     |             | 74616647                 | -           | 717            |
| lincRNA novel transcript                                      |              |             | -                        | 86          | 111 84 3       |
| 35                                                            | 38           | 5.79936592  | 6.746249841              | 5.468977873 |                |
| 0.232495281                                                   |              | 3.000518086 | 2.464310679              |             |                |
| ENSG00000180089                                               | 19.23711862  |             | 21.75213511              | 36.28574294 |                |
| 41.87862791                                                   | 65.45407588  |             | 109.857648               | 25.75833222 |                |
| 72.39678393                                                   | -1.49326888  |             | 0.022745783              | 1           | TMEM86B 19     |
| 55226639                                                      | 55229264     |             | -                        | 2626        | protein_coding |
| transmembrane protein 86B [Source:HGNC Symbol;Acc:HGNC:28448] |              |             |                          |             |                |
| -                                                             | 20           | 25          | 39                       | 38          | 54 119         |
| 0.368244688                                                   | 0.414862218  |             | 0.693291573              | 0.804083071 |                |
| 1.263998033                                                   | 2.107090833  |             |                          |             |                |
| ENSG00000252777                                               | 26.93196607  |             | 0                        | 6.512825656 | 0 0            |
| 0                                                             | 11.14826391  |             | 0                        | 5.819383232 | 0.022796876    |
| 1                                                             | RF00422 1    |             | 28689665                 | 28689794    | +              |
| 130                                                           | scaRNA       |             | -                        | 28          | 0 7 0          |
| 0                                                             | 0            | 10.41395977 | 0                        | 2.513626368 | 0              |
| 0                                                             | 0            |             |                          |             |                |
| ENSG00000203943                                               | 40.3979491   |             | 26.10256213              | 11.16484398 |                |
| 5.510345777                                                   | 4.848450065  |             | 0                        | 25.88845174 | 3.452931947    |
| 2.93035246                                                    | 0.022944796  |             | 1                        | SAMD13 1    |                |
| 84298366                                                      | 84389957     |             | +                        | 3455        | protein_coding |
| sterile alpha motif domain containing 13 [Source:HGNC         |              |             |                          |             |                |

|                                        |                        |             |                      |                |               |            |
|----------------------------------------|------------------------|-------------|----------------------|----------------|---------------|------------|
| Symbol;Acc:HGNC:24582]                 | -                      | 42          | 30                   | 12             | 5             | 4          |
| 0                                      | 0.587763286            | 0.378383161 | 0.162135916          |                |               |            |
| 0.080414432                            | 0.071163828            | 0           |                      |                |               |            |
| ENSG00000105928                        | 2153.595429            | 1708.847734 | 1711.01234           |                |               |            |
| 1294.931258                            | 1558.776696            | 1496.464264 | 1857.818501          |                |               |            |
| 1450.057406                            | 0.357400535            | 0.022967187 | 1                    | GSDME          | 7             |            |
| 24698351                               | 24758113               | -           | 8843                 | protein_coding |               |            |
| gasdermin E [Source:HGNC               | Symbol;Acc:HGNC:2810]  | -           | 2239                 |                |               |            |
| 1964                                   | 1839                   | 1175        | 1286                 | 1621           | 12.2420933    |            |
| 9.678330671                            | 9.707963617            | 7.383296092 | 8.938995194          |                |               |            |
| 8.52343018                             |                        |             |                      |                |               |            |
| ENSG00000214026                        | 840.6620836            | 503.7794491 | 766.6526201          |                |               |            |
| 936.7587821                            | 1541.807121            | 729.3070751 | 703.6980509          |                |               |            |
| 1069.290993                            | -0.602999444           | 0.022981043 | 1                    | MRPL23         | 11            |            |
| 1947278                                | 1984522                | +           | 2975                 | protein_coding | mitochondrial |            |
| ribosomal protein L23 [Source:HGNC     | Symbol;Acc:HGNC:10322] | -           |                      |                |               |            |
| 874                                    | 579                    | 824         | 850                  | 1272           | 790           | 14.2044911 |
| 8.481061088                            | 12.92963537            | 15.87610634 | 26.2813398           |                |               |            |
| 12.34727552                            |                        |             |                      |                |               |            |
| ENSG00000236526                        | 0                      | 11.31111026 | 21.3992843           | 0              | 0             |            |
| 0                                      | 10.90346485            | 0           | 5.788958972          | 0.022987026    |               |            |
| 1                                      | AL035448.1             | 20          | 11909404             | 11918677       |               |            |
| -                                      | 1831                   | antisense   | novel transcript     | -              |               |            |
| 0                                      | 13                     | 23          | 0                    | 0              | 0             |            |
| 0.309395224                            | 0.586388612            | 0           | 0                    | 0              |               |            |
| ENSG00000268379                        | 8.656703379            | 12.18119566 | 5.582421991          | 0              |               |            |
| 0                                      | 0                      | 8.806773676 | 0                    | 5.48086395     |               |            |
| 0.023066237                            | 1                      | AC025588.1  | 19                   | 57175233       |               |            |
| 57177921                               | +                      | 2072        | processed_pseudogene |                |               |            |
| pentatricopeptide repeat domain        | 3                      | pseudogene  | -                    | 9              | 14            |            |
| 6                                      | 0                      | 0           | 0                    | 0.21001677     | 0.29444005    |            |
| 0.135178473                            | 0                      | 0           | 0                    |                |               |            |
| ENSG00000197776                        | 86.56703379            | 88.74871123 | 67.91946756          |                |               |            |
| 29.7558672                             | 39.99971304            | 32.31107295 | 81.07840419          |                |               |            |
| 34.02221773                            | 1.254671207            | 0.0230815   | 1                    | KLHDC1         | 14            |            |
| 49693105                               | 49753152               | +           | 3006                 | protein_coding |               |            |
| kelch domain containing 1 [Source:HGNC | Symbol;Acc:HGNC:19836] |             |                      |                |               |            |
| -                                      | 90                     | 102         | 73                   | 27             | 33            | 35         |
| 1.447620584                            | 1.478665               | 1.133652421 | 0.499099152          |                |               |            |
| 0.674795727                            | 0.541389821            |             |                      |                |               |            |
| ENSG00000156381                        | 565.5712874            | 544.6734631 | 628.022474           |                |               |            |
| 694.3035679                            | 806.0548233            | 841.0110701 | 579.4224082          |                |               |            |
| 780.4564871                            | -0.430043874           | 0.023096401 | 1                    | ANKRD9         | 14            |            |
| 102501760                              | 102509799              | -           | 7215                 | protein_coding |               |            |
| ankyrin repeat domain 9 [Source:HGNC   | Symbol;Acc:HGNC:20096] |             |                      |                |               |            |
| -                                      | 588                    | 626         | 675                  | 630            | 665           | 911        |
| 3.940417209                            | 3.780912228            | 4.367304501 | 4.85194934           |                |               |            |
| 5.665427288                            | 5.871013239            |             |                      |                |               |            |
| ENSG00000230989                        | 3442.482377            | 4071.129606 | 3613.687836          |                |               |            |
| 4259.497286                            | 4504.210111            | 4668.488454 | 3709.09994           |                |               |            |

|                                                          |                                                       |                      |                      |             |
|----------------------------------------------------------|-------------------------------------------------------|----------------------|----------------------|-------------|
| 4477.398617                                              | -0.271562177                                          | 0.023153213          | 0.192144665          | HSBP1       |
| 16                                                       | 83807843                                              | 83819737             | + 9525               |             |
| protein_coding                                           | heat shock factor binding protein 1 [Source:HGNC      |                      |                      |             |
| Symbol;Acc:HGNC:5203]                                    | -                                                     | 3579 4679            | 3884 3865            | 3716        |
| 5057                                                     | 18.16761553                                           | 21.40654896          | 19.03532397          |             |
| 22.54740457                                              | 23.98049156                                           | 24.68646967          |                      |             |
| ENSG00000263766                                          | 36.55052538                                           | 2.610256213          | 7.443229322          |             |
| 2.204138311                                              | 0 0                                                   | 15.5346703           | 0.73471277           |             |
| 4.417210564                                              | 0.023182795                                           | 1 AC025682.1         | 17                   |             |
| 47603860                                                 | 47649420                                              | - 1242               | antisense            | "novel      |
| transcript, antisense to NPEPPS"                         |                                                       | -                    | 38 3                 | 8           |
| 2                                                        | 0 0                                                   | 1.479323707          | 0.105258762          |             |
| 0.300686844                                              | 0.08947886                                            | 0 0                  |                      |             |
| ENSG00000217416                                          | 0.961855931                                           | 3.480341617          | 1.86080733           |             |
| 12.12276071                                              | 14.5453502                                            | 27.69520538          | 2.101001626          |             |
| 18.12110543                                              | -3.102772346                                          | 0.023223361          | 1 ISCA1P1            | 5           |
| 62776877                                                 | 62777263                                              | -                    | 387                  |             |
| processed_pseudogene                                     | iron-sulfur cluster assembly 1 pseudogene 1           |                      |                      |             |
| [Source:HGNC Symbol;Acc:HGNC:33263]                      | -                                                     | 1                    | 4                    | 2           |
| 11                                                       | 12 30                                                 | 0.124936764          | 0.450409585          |             |
| 0.241248747                                              | 1.579405928                                           | 1.905976937          | 3.604469109          |             |
| ENSG00000226284                                          | 0 3.480341617                                         | 3.721614661          | 44.08276622          |             |
| 4.848450065                                              | 18.46347025                                           | 2.400652093          | 22.46489551          |             |
| -3.219879986                                             | 0.023242441                                           | 1                    | ARPC3P1              | 20          |
| 49134480                                                 | 49135012                                              | + 533                | processed_pseudogene |             |
| actin related protein 2/3 complex subunit 3 pseudogene 1 |                                                       |                      |                      |             |
| [Source:HGNC Symbol;Acc:HGNC:16092]                      | -                                                     | 0                    | 4                    | 4           |
| 40                                                       | 4 20                                                  | 0                    | 0.327032851          | 0.350331201 |
| 4.170084218                                              | 0.461296482                                           | 1.744752401          |                      |             |
| ENSG00000204673                                          | 2974.058538                                           | 2233.509233          | 2904.720243          |             |
| 2791.541171                                              | 3728.4581                                             | 3942.874073          | 2704.096005          |             |
| 3487.624448                                              | -0.367342181                                          | 0.023318239          | 0.192144665          | AKT1S1      |
| 19                                                       | 49869033                                              | 49878459             | - 5737               |             |
| protein_coding                                           | AKT1 substrate 1 [Source:HGNC Symbol;Acc:HGNC:28426]  |                      |                      |             |
| -                                                        | 3092 2567                                             | 3122 2533            | 3076 4271            |             |
| 26.05888635                                              | 19.49842878                                           | 25.40353091          | 24.53366233          |             |
| 32.95708875                                              | 34.61590893                                           |                      |                      |             |
| ENSG00000100029                                          | 2573.926471                                           | 1997.716088          | 2612.573492          |             |
| 2432.266626                                              | 3164.82578                                            | 3825.631037          | 2394.738684          |             |
| 3140.907814                                              | -0.391701218                                          | 0.02336712           | 0.192144665          | PES1        |
| 22                                                       | 30576625                                              | 30607083             | - 4557               |             |
| protein_coding                                           | pescadillo ribosomal biogenesis factor 1 [Source:HGNC |                      |                      |             |
| Symbol;Acc:HGNC:8848]                                    | -                                                     | 2676 2296            | 2808 2207            | 2611        |
| 4144                                                     | 28.39280482                                           | 21.95591056          | 28.76498227          |             |
| 26.91134155                                              | 35.21885264                                           | 42.28357863          |                      |             |
| ENSG00000234899                                          | 0 0                                                   | 0 0                  | 10.90901265          |             |
| 19.38664377                                              | 0 10.09855214                                         | -5.900924669         | 0.023393357          |             |
| 1                                                        | SOX9-AS1                                              | 17 72034107          | 72237203             |             |
| -                                                        | 10700                                                 | processed_transcript | SOX9 antisense RNA   | 1           |
| [Source:HGNC Symbol;Acc:HGNC:49321]                      | -                                                     | 0                    | 0                    | 0           |

|                                                          |                                               |              |                        |              |              |             |       |
|----------------------------------------------------------|-----------------------------------------------|--------------|------------------------|--------------|--------------|-------------|-------|
| 0                                                        | 9                                             | 21           | 0                      | 0            | 0            | 0           |       |
| 0.051701851                                              | 0.091257073                                   |              |                        |              |              |             |       |
| ENSG00000182472                                          | 8.656703379                                   |              | 0                      | 24.19049529  | 0            | 0           |       |
| 0                                                        | 10.94906622                                   |              | 0                      | 5.79395089   | 0.023494543  |             |       |
| 1                                                        | CAPN12                                        | 19           | 38730187               |              | 38769904     |             | -     |
| 5966                                                     | protein_coding                                |              | calpain 12             | [Source:HGNC |              |             |       |
| Symbol;Acc:HGNC:13249]                                   | -                                             |              | 9                      | 0            | 26           | 0           | 0     |
| 0                                                        | 0.072939113                                   |              | 0                      | 0.203439901  | 0            | 0           |       |
| 0                                                        |                                               |              |                        |              |              |             |       |
| ENSG00000163655                                          | 3427.092682                                   |              | 3940.616796            |              | 3850.010367  |             |       |
| 4767.551166                                              | 4355.120271                                   |              | 4373.07293             |              | 3739.239948  |             |       |
| 4498.581456                                              | -0.266633439                                  |              | 0.023539046            |              | 0.192144665  |             | GMPS  |
| 3                                                        | 155870536                                     |              | 155944026              |              | + 8885       |             |       |
| protein_coding                                           | guanine monophosphate synthase                |              | [Source:HGNC           |              |              |             |       |
| Symbol;Acc:HGNC:4378]                                    | -                                             |              | 3563                   | 4529         | 4138         | 4326        | 3593  |
| 4737                                                     | 19.38918733                                   |              | 22.2128092             |              | 21.74097867  |             |       |
| 27.05460058                                              | 24.85691031                                   |              | 24.79002534            |              |              |             |       |
| ENSG00000277142                                          | 215.4557285                                   |              | 208.820497             |              | 122.8132838  |             |       |
| 96.98208568                                              | 94.54477627                                   |              | 106.164954             |              | 182.3631698  |             |       |
| 99.2306053                                               | 0.877258974                                   |              | 0.023564027            |              | 1            | LINC00235   |       |
| 16                                                       | 525155                                        | 527407       | -                      | 2253         | lincRNA      | long        |       |
| intergenic non-protein coding RNA                        | 235                                           | [Source:HGNC |                        |              |              |             |       |
| Symbol;Acc:HGNC:14138]                                   | -                                             |              | 224                    | 240          | 132          | 88          | 78    |
| 115                                                      | 4.807154087                                   |              | 4.642037534            |              | 2.735009098  |             |       |
| 2.170368732                                              | 2.128044823                                   |              | 2.373382123            |              |              |             |       |
| ENSG00000279342                                          | 195.256754                                    |              | 67.86666153            |              | 60.47623824  |             |       |
| 42.98069706                                              | 24.24225033                                   |              | 56.31358428            |              | 107.8665513  |             |       |
| 41.17884389                                              | 1.383810409                                   |              | 0.023649216            |              | 1            | AP000866.6  |       |
| 11                                                       | 124789240                                     |              | 124792818              |              | -            | 3579        |       |
| sense_intronic                                           | "novel transcript, sense intronic to MSANTD2" |              |                        |              |              |             | -     |
| 203                                                      | 78                                            | 65           | 39                     | 20           | 61           | 2.742430031 |       |
| 0.949711074                                              |                                               | 0.847808359  |                        | 0.605501122  |              | 0.343491233 |       |
| 0.792499788                                              |                                               |              |                        |              |              |             |       |
| ENSG00000232491                                          | 0                                             | 0            | 0                      | 0            | 0            | 37.85011402 |       |
| 0                                                        | 12.61670467                                   |              | -6.224163289           |              | 0.023761645  | 1           |       |
| SAPCD2P3                                                 | 7                                             |              | 66556216               |              | 66557065     |             | +     |
| 850                                                      | processed_pseudogene                          |              | suppressor APC domain  |              |              |             |       |
| containing 2 pseudogene 3                                | [Source:HGNC                                  |              | Symbol;Acc:HGNC:51279] |              |              |             | -     |
| 0                                                        | 0                                             | 0            | 0                      | 0            | 41           | 0           | 0     |
| 0                                                        | 0                                             | 0            | 2.242827896            |              |              |             |       |
| ENSG00000273682                                          | 0                                             | 0            | 0                      | 12.12276071  |              | 6.060562582 |       |
| 6.462214589                                              | 0                                             |              | 8.215179293            |              | -5.601097903 |             |       |
| 0.023772958                                              | 1                                             | AC109583.2   | 3                      |              | 46918807     |             |       |
| 46918935                                                 | -                                             | 129          | processed_pseudogene   |              | biliverdin   |             |       |
| reductase B (flavin reductase (NADPH) (BLVRB) pseudogene |                                               |              |                        |              |              |             | -     |
| 0                                                        | 0                                             | 0            | 11                     | 5            | 7            | 0           | 0     |
| 0                                                        | 4.738217785                                   |              | 2.382471171            |              | 2.523128376  |             |       |
| ENSG00000145425                                          | 22089.98331                                   |              | 27767.03551            |              | 26859.82341  |             |       |
| 28670.32908                                              | 32734.31062                                   |              | 30435.18437            |              | 25572.28074  |             |       |
| 30613.27469                                              | -0.259543586                                  |              | 0.023786561            |              | 0.192144665  |             | RPS3A |

|                                      |                                                                |                                  |                |             |                |       |
|--------------------------------------|----------------------------------------------------------------|----------------------------------|----------------|-------------|----------------|-------|
| 4                                    | 151099573                                                      | 151104652                        | +              | 2341        |                |       |
| protein_coding                       | ribosomal protein S3A [Source:HGNC                             |                                  |                |             |                |       |
| Symbol;Acc:HGNC:10421]               | -                                                              | 22966                            | 31913          | 28869       | 26015          | 27006 |
| 32968                                | 474.3349912                                                    | 594.0524841                      |                | 575.6736652 |                |       |
| 617.4964429                          | 709.0979173                                                    | 654.8204078                      |                |             |                |       |
| ENSG00000085224                      | 3214.522521                                                    | 2499.755366                      |                | 2560.470887 |                |       |
| 2262.547976                          | 2254.52928                                                     | 2119.606385                      |                | 2758.249591 |                |       |
| 2212.227881                          | 0.318265222                                                    | 0.023816999                      |                | 0.192144665 |                | ATRX  |
| X                                    | 77504878                                                       | 77786233                         |                | -           | 19266          |       |
| protein_coding                       | "ATRX, chromatin remodeler [Source:HGNC                        |                                  |                |             |                |       |
| Symbol;Acc:HGNC:886]"                | -                                                              | 3342                             | 2873           | 2752        | 2053           | 1860  |
| 2296                                 | 8.387182751                                                    | 6.498343553                      |                | 6.668112363 |                |       |
| 5.921196                             | 5.934289763                                                    | 5.541295954                      |                |             |                |       |
| ENSG00000232712                      | 0                                                              | 18.27179349                      | 13.95605498    | 0           | 0              |       |
| 0                                    | 10.74261616                                                    | 0                                | 5.767999407    | 0.023877895 |                |       |
| 1                                    | KIZ-AS1 20                                                     | 21154023                         |                | 21218289    |                | -     |
| 5451                                 | antisense                                                      | KIZ antisense RNA 1 [Source:HGNC |                |             |                |       |
| Symbol;Acc:HGNC:51231]               | -                                                              | 0                                | 21             | 15          | 0              | 0     |
| 0                                    | 0                                                              | 0.167881063                      | 0.128457987    | 0           | 0              |       |
| 0                                    |                                                                |                                  |                |             |                |       |
| ENSG00000198356                      | 1968.919091                                                    | 1922.018658                      |                | 2304.609879 |                |       |
| 2252.629354                          | 2666.647536                                                    | 2856.298848                      |                | 2065.182542 |                |       |
| 2591.858579                          | -0.32794476                                                    | 0.023878854                      |                | 1           | ASNA1          | 19    |
| 12737139                             | 12748323                                                       | +                                |                | 1652        | protein_coding |       |
|                                      | "arsA arsenite transporter, ATP-binding, homolog 1 (bacterial) |                                  |                |             |                |       |
| [Source:HGNC Symbol;Acc:HGNC:752]"   | -                                                              |                                  |                | 2047        | 2209           | 2477  |
| 2044                                 | 2200                                                           | 3094                             | 59.91133764    | 58.26989971 |                |       |
| 69.99419119                          | 68.75161306                                                    | 81.85778673                      |                | 87.08458459 |                |       |
| ENSG00000198952                      | 5650.903594                                                    | 4817.662883                      |                | 4885.549646 |                |       |
| 5531.285091                          | 6467.832387                                                    | 6614.538219                      |                | 5118.038708 |                |       |
| 6204.551899                          | -0.277845836                                                   | 0.023901065                      |                | 0.192144665 |                | SMG5  |
| 1                                    | 156249224                                                      | 156282825                        |                | -           | 5304           |       |
| protein_coding                       | "SMG5, nonsense mediated mRNA decay factor                     |                                  |                |             |                |       |
| [Source:HGNC Symbol;Acc:HGNC:24644]" | -                                                              |                                  |                | 5875        | 5537           | 5251  |
| 5019                                 | 5336                                                           | 7165                             | 53.5556842     | 45.49143178 |                |       |
| 46.21516828                          | 52.58062256                                                    | 61.83860241                      |                | 62.81215554 |                |       |
| ENSG00000100767                      | 10.58041524                                                    | 21.75213511                      |                | 26.05130263 |                | 0     |
| 0                                    | 4.615867564                                                    | 19.46128432                      |                | 1.538622521 |                |       |
| 3.596122805                          | 0.023901726                                                    | 1                                | PAPLN          | 14          | 73237497       |       |
| 73274640                             | +                                                              | 7699                             | protein_coding | "papilin,   |                |       |
|                                      | proteoglycan like sulfated glycoprotein [Source:HGNC           |                                  |                |             |                |       |
| Symbol;Acc:HGNC:19262]"              | -                                                              | 11                               | 25             | 28          | 0              | 0     |
| 5                                    | 0.069081154                                                    | 0.141502557                      |                | 0.16977344  |                | 0     |
| 0                                    | 0.030197202                                                    |                                  |                |             |                |       |
| ENSG00000230366                      | 34.62681351                                                    | 0                                | 0.930403665    | 0           | 0              |       |
| 0                                    | 11.85240573                                                    | 0                                | 5.907713058    | 0.023908801 |                |       |
| 1                                    | DSCR9                                                          | 21                               | 37208503       | 37221736    |                | +     |
| 1901                                 | lincRNA Down syndrome critical region 9 [Source:HGNC           |                                  |                |             |                |       |
| Symbol;Acc:HGNC:16301]               | -                                                              | 36                               | 0              | 1           | 0              | 0     |
| 0                                    | 0.915633345                                                    | 0                                | 0.024556356    | 0           | 0              |       |



|                                                                                        |                                                                                                    |                      |                                    |                |                  |                          |
|----------------------------------------------------------------------------------------|----------------------------------------------------------------------------------------------------|----------------------|------------------------------------|----------------|------------------|--------------------------|
| 0                                                                                      |                                                                                                    |                      |                                    |                |                  |                          |
| ENSG00000257038                                                                        | 13.46598303                                                                                        |                      | 10.44102485                        |                | 2.791210996      | 0                        |
| 0                                                                                      | 0                                                                                                  | 8.899406293          | 0                                  |                | 5.495468341      |                          |
| 0.023913193                                                                            | 1                                                                                                  | AP002761.3           | 11                                 |                | 73307235         |                          |
| 73309361                                                                               | -                                                                                                  | 1695                 | antisense                          |                | novel transcript |                          |
| -                                                                                      | 14                                                                                                 | 12                   | 3                                  | 0              | 0                | 0                        |
| 0.399355389                                                                            | 0.308510636                                                                                        |                      | 0.082622359                        |                | 0                | 0                        |
| ENSG00000051108                                                                        | 1892.932472                                                                                        |                      | 2270.922905                        |                | 2028.27999       |                          |
| 3477.028185                                                                            | 2158.772392                                                                                        |                      | 2495.338005                        |                | 2064.045122      |                          |
| 2710.379527                                                                            | -0.39299425                                                                                        |                      | 0.023943935                        |                | 0.192144665      |                          |
| HERPUD1                                                                                | 16                                                                                                 | 56932048             | 56944863                           |                | +                | 5155                     |
| protein_coding                                                                         | homocysteine inducible ER protein with ubiquitin like domain 1 [Source:HGNC Symbol;Acc:HGNC:13744] |                      |                                    |                | -                | 1968 2610                |
|                                                                                        | 2180                                                                                               | 3155                 | 1781                               | 2703           | 18.45855249      | 22.06329823              |
|                                                                                        | 19.74121416                                                                                        |                      | 34.00812886                        |                | 21.23648377      | 24.38082483              |
| ENSG00000137168                                                                        | 2181.489251                                                                                        |                      | 2583.283565                        |                | 2150.16287       |                          |
| 2788.234963                                                                            | 2727.253162                                                                                        |                      | 2991.082181                        |                | 2304.978562      |                          |
| 2835.523435                                                                            | -0.298902266                                                                                       |                      | 0.023965756                        |                | 0.192144665      | PPIL1                    |
| 6                                                                                      | 36854827                                                                                           |                      | 36875024                           |                | -                | 1810                     |
| protein_coding                                                                         | peptidylprolyl isomerase like 1 [Source:HGNC Symbol;Acc:HGNC:9260]                                 |                      |                                    |                | -                | 2268 2969 2311 2530 2250 |
|                                                                                        | 3240                                                                                               | 60.58508086          | 71.48093432                        |                | 59.60290212      |                          |
| 77.67012247                                                                            | 76.4101942                                                                                         |                      | 83.23336512                        |                |                  |                          |
| ENSG00000156486                                                                        | 26.93196607                                                                                        |                      | 14.79145187                        |                | 2.791210996      |                          |
| 2.204138311                                                                            | 0                                                                                                  | 0                    | 14.83820964                        |                | 0.73471277       |                          |
| 4.35232232                                                                             | 0.02403504                                                                                         |                      | 1                                  | KCNS2          | 8                | 98427022                 |
| 98432848                                                                               | +                                                                                                  |                      | 5348                               | protein_coding | potassium        |                          |
| voltage-gated channel modifier subfamily S member 2 [Source:HGNC Symbol;Acc:HGNC:6301] |                                                                                                    |                      |                                    |                | -                | 28 17 3 2 0              |
|                                                                                        | 0                                                                                                  | 0.253144123          | 0.13852116                         |                | 0.026186406      |                          |
| 0.020780244                                                                            | 0                                                                                                  | 0                    |                                    |                |                  |                          |
| ENSG00000259363                                                                        | 0                                                                                                  | 19.14187889          | 13.02565131                        |                | 0                | 0                        |
| 0                                                                                      | 10.72251007                                                                                        | 0                    | 5.765356724                        |                | 0.024088696      |                          |
| 1                                                                                      | AC090825.1                                                                                         | 15                   | 99807023                           |                | 99877148         |                          |
| +                                                                                      | 1291                                                                                               | lincRNA              | ubiquitin conjugating enzyme E2 Q2 |                |                  |                          |
| pseudogene [Source:NCBI gene;Acc:400464]                                               |                                                                                                    |                      |                                    |                | -                | 0 22                     |
|                                                                                        | 14                                                                                                 | 0                    | 0                                  | 0              | 0.742600156      |                          |
| 0.506229943                                                                            | 0                                                                                                  | 0                    | 0                                  |                |                  |                          |
| ENSG00000160271                                                                        | 191.4093303                                                                                        |                      | 154.0051166                        |                | 211.201632       |                          |
| 54.00138862                                                                            | 129.6960392                                                                                        |                      | 106.164954                         |                | 185.5386929      |                          |
| 96.62079394                                                                            | 0.941823535                                                                                        |                      | 0.024088719                        |                | 1                | RALGDS 9                 |
| 133097720                                                                              | 133149334                                                                                          |                      | -                                  |                | 7584             | protein_coding           |
| ral guanine nucleotide dissociation stimulator [Source:HGNC Symbol;Acc:HGNC:9842]      |                                                                                                    |                      |                                    |                | -                | 199 177 227 49 107       |
|                                                                                        | 115                                                                                                | 1.26869132           | 1.017029475                        |                | 1.397248232      |                          |
| 0.35901269                                                                             | 0.867227046                                                                                        |                      | 0.705067237                        |                |                  |                          |
| ENSG00000276692                                                                        | 0                                                                                                  | 0                    | 0                                  | 13.22482987    | 16.96957523      |                          |
| 0                                                                                      | 0                                                                                                  | 10.0648017           | -5.891132385                       |                | 0.024089305      |                          |
| 1                                                                                      | CR769767.2                                                                                         | 9                    | 39873931                           |                | 39874390         |                          |
| -                                                                                      | 460                                                                                                | processed_pseudogene | novel pseudogene                   |                |                  |                          |

|                                       |                                                    |             |                      |                       |                |             |        |
|---------------------------------------|----------------------------------------------------|-------------|----------------------|-----------------------|----------------|-------------|--------|
| -                                     | 0                                                  | 0           | 0                    | 12                    | 14             | 0           | 0      |
| 0                                     | 0                                                  | 1.449557536 |                      | 1.870757798           |                | 0           |        |
| ENSG00000185825                       | 6182.809924                                        |             | 6606.558474          |                       | 7275.756662    |             |        |
| 7000.343275                           | 8924.784458                                        |             | 8483.964582          |                       | 6688.37502     |             |        |
| 8136.364105                           | -0.282702612                                       |             | 0.024196896          |                       | 0.192685051    |             | BCAP31 |
| X                                     | 153700492                                          |             | 153724746            |                       | -              | 3533        |        |
| protein_coding                        | B cell receptor associated protein 31 [Source:HGNC |             |                      |                       |                |             |        |
| Symbol;Acc:HGNC:16695]                | -                                                  |             | 6428                 | 7593                  | 7820           | 6352        | 7363   |
| 9190                                  | 87.96976811                                        |             | 93.65443759          |                       | 103.3258892    |             |        |
| 99.90308413                           | 128.1027707                                        |             | 120.9491699          |                       |                |             |        |
| ENSG0000010292                        | 1699.59943                                         |             | 1745.391321          |                       | 1444.916892    |             |        |
| 2858.767389                           | 1923.622563                                        |             | 1750.33698           |                       | 1629.969214    |             |        |
| 2177.575644                           | -0.417643331                                       |             | 0.024237035          |                       | 1              | NCAPD2      | 12     |
| 6493356                               | 6531955                                            | +           | 6487                 | protein_coding        | non-SMC        |             |        |
| condensin I complex subunit D2        | [Source:HGNC Symbol;Acc:HGNC:24305]                |             |                      |                       |                |             |        |
| -                                     | 1767                                               | 2006        | 1553                 | 2594                  | 1587           | 1896        |        |
| 13.17024543                           | 13.47552296                                        |             | 11.17567063          |                       | 22.21969624    |             |        |
| 15.03766442                           | 13.59018764                                        |             |                      |                       |                |             |        |
| ENSG00000163191                       | 4248.517647                                        |             | 4711.512464          |                       | 4609.219757    |             |        |
| 4612.159415                           | 6170.864821                                        |             | 5925.850778          |                       | 4523.083289    |             |        |
| 5569.625005                           | -0.300234374                                       |             | 0.024243054          |                       | 0.192685051    |             |        |
| S100A11 1                             | 152032506                                          |             | 152047907            |                       | -              | 680         |        |
| protein_coding                        | S100 calcium binding protein A11 [Source:HGNC      |             |                      |                       |                |             |        |
| Symbol;Acc:HGNC:10488]                | -                                                  |             | 4417                 | 5415                  | 4954           | 4185        | 5091   |
| 6419                                  | 314.0651175                                        |             | 347.0149186          |                       | 340.0894231    |             |        |
| 341.9783348                           | 460.1946278                                        |             | 438.9241544          |                       |                |             |        |
| ENSG00000147471                       | 969.5507784                                        |             | 1066.724706          |                       | 1058.799371    |             |        |
| 1237.623662                           | 1539.382896                                        |             | 1221.358557          |                       | 1031.691618    |             |        |
| 1332.788372                           | -0.368742395                                       |             | 0.024346677          |                       | 1              | PLPBP       | 8      |
| 37762593                              |                                                    | 37779767    | +                    | 3428                  | protein_coding |             |        |
| pyridoxal phosphate binding protein   | [Source:HGNC                                       |             |                      |                       |                |             |        |
| Symbol;Acc:HGNC:9457]                 | -                                                  |             | 1008                 | 1226                  | 1138           | 1123        | 1270   |
| 1323                                  | 14.21742465                                        |             | 15.58505196          |                       | 15.4969947     |             |        |
| 18.20333605                           | 22.77247678                                        |             | 17.94527215          |                       |                |             |        |
| ENSG00000282855                       | 11.54227117                                        |             | 6.960683234          |                       | 7.443229322    |             | 0      |
| 0                                     | 0                                                  | 8.648727909 | 0                    | 5.453962192           |                |             |        |
| 0.024374265                           | 1                                                  | AC093591.3  | 4                    | 127809170             |                |             |        |
| 127809477                             | +                                                  | 308         | processed_pseudogene | INTS3 and NABP        |                |             |        |
| interacting protein (INIP) pseudogene | -                                                  |             | 12                   | 8                     | 8              |             |        |
| 0                                     | 0                                                  | 0           | 1.883786785          |                       | 1.131873438    |             |        |
| 1.212509936                           | 0                                                  | 0           | 0                    |                       |                |             |        |
| ENSG00000224533                       | 0                                                  | 0           | 0                    | 5.510345777           | 15.75746271    |             |        |
| 3.692694051                           | 0                                                  | 8.320167513 |                      | -5.616349738          |                |             |        |
| 0.024376911                           | 1                                                  | TMLHE-AS1   | X                    | 155466540             |                |             |        |
| 155611616                             | +                                                  | 1845        | antisense            | TMLHE antisense RNA 1 |                |             |        |
| [Source:HGNC Symbol;Acc:HGNC:44261]   | -                                                  |             | 0                    | 0                     | 0              |             |        |
| 5                                     | 13                                                 | 4           | 0                    | 0                     | 0              | 0.150586375 |        |
| 0.433106141                           |                                                    | 0.100807917 |                      |                       |                |             |        |
| ENSG00000248449                       | 5.771135586                                        |             | 26.97264753          |                       | 0              | 0           | 0      |
| 0                                     | 10.91459437                                        |             | 0                    | 5.791225238           | 0.024439294    |             |        |

|                                         |                                       |                                |                                     |                    |          |      |
|-----------------------------------------|---------------------------------------|--------------------------------|-------------------------------------|--------------------|----------|------|
| 1                                       | PCDHGB8P                              | 5                              | 141426286                           | 141429158          |          |      |
| +                                       | 2873                                  | transcribed_unitary_pseudogene | "protocadherin                      |                    |          |      |
| gamma subfamily                         | B, 8                                  | pseudogene                     | [Source:HGNC Symbol;Acc:HGNC:8715]" |                    |          |      |
| -                                       | 6                                     | 31                             | 0                                   | 0                  | 0        | 0    |
| 0.100975693                             | 0.47020221                            | 0                              | 0                                   | 0                  | 0        |      |
| ENSG00000114854                         | 11.54227117                           | 4.350427021                    | 10.23444032                         | 0                  |          |      |
| 0                                       | 0                                     | 8.70904617                     | 0                                   | 5.463689606        |          |      |
| 0.024445905                             | 1                                     | TNNC1                          | 3                                   | 52451102           | 52454070 |      |
| -                                       | 1168                                  | protein_coding                 | "troponin C1, slow skeletal         |                    |          |      |
| and cardiac type                        | [Source:HGNC Symbol;Acc:HGNC:11943]"  | -                              | 12                                  |                    |          |      |
| 5                                       | 11                                    | 0                              | 0                                   | 0.496751995        |          |      |
| 0.186545922                             | 0.439638663                           | 0                              | 0                                   | 0                  |          |      |
| ENSG00000273489                         | 12.5041271                            | 6.960683234                    | 6.512825656                         | 0                  |          |      |
| 0                                       | 0                                     | 8.659211998                    | 0                                   | 5.455652878        |          |      |
| 0.024503637                             | 1                                     | AC008264.2                     | 7                                   | 131493964          |          |      |
| 131497694                               | -                                     | 3731                           | antisense                           | "novel transcript, |          |      |
| antisense to MKLN1"                     | -                                     | 13                             | 8                                   | 7                  | 0        | 0    |
| 0                                       | 0.168468737                           | 0.093437957                    | 0.0875828                           | 0                  |          |      |
| 0                                       | 0                                     |                                |                                     |                    |          |      |
| ENSG00000197989                         | 516.5166349                           | 333.2427098                    | 494.9747499                         |                    |          |      |
| 316.2938476                             | 313.9371417                           | 264.0276246                    | 448.2446982                         |                    |          |      |
| 298.0862047                             | 0.588958235                           | 0.02454872                     | 1                                   | SNHG12             | 1        |      |
| 28578538                                | 28583132                              | -                              | 4266                                | antisense          |          |      |
| small nucleolar RNA host gene 12        | [Source:HGNC                          |                                |                                     |                    |          |      |
| Symbol;Acc:HGNC:30062]                  | -                                     | 537                            | 383                                 | 532                | 287      | 259  |
| 286                                     | 6.086318158                           | 3.912339376                    | 5.821525673                         |                    |          |      |
| 3.738290863                             | 3.731867994                           | 3.117282778                    |                                     |                    |          |      |
| ENSG00000279953                         | 52.9020762                            | 6.960683234                    | 10.23444032                         | 0                  |          |      |
| 6.060562582                             | 0                                     | 23.36573325                    | 2.020187527                         |                    |          |      |
| 3.578340814                             | 0.024589414                           | 1                              | AC117503.3                          | 12                 |          |      |
| 123649068                               | 123650485                             | +                              | 1418                                | TEC                | novel    |      |
| transcript                              | -                                     | 55                             | 8                                   | 11                 | 0        | 5    |
| 1.875373069                             | 0.245851212                           | 0.36212832                     | 0                                   |                    |          | 0    |
| 0.21674103                              | 0                                     |                                |                                     |                    |          |      |
| ENSG00000114503                         | 4660.191985                           | 4596.661191                    | 4241.71031                          |                    |          |      |
| 4138.269679                             | 3336.945757                           | 3644.689028                    | 4499.521162                         |                    |          |      |
| 3706.634821                             | 0.279571235                           | 0.024648036                    | 0.195059461                         | NCBP2              |          |      |
| 3                                       | 196935402                             | 196942597                      | -                                   | 5114               |          |      |
| protein_coding                          | nuclear cap binding protein subunit 2 | [Source:HGNC                   |                                     |                    |          |      |
| Symbol;Acc:HGNC:7659]                   | -                                     | 4845                           | 5283                                | 4559               | 3755     | 2753 |
| 3948                                    | 45.80725571                           | 45.01720059                    | 41.61547963                         |                    |          |      |
| 40.80010317                             | 33.08970138                           | 35.89611422                    |                                     |                    |          |      |
| ENSG00000135617                         | 256.8155336                           | 306.2700623                    | 349.8317781                         |                    |          |      |
| 438.6235239                             | 421.8151557                           | 468.9721445                    | 304.3057913                         |                    |          |      |
| 443.1369413                             | -0.54244337                           | 0.024712748                    | 1                                   | PRADC1             | 2        |      |
| 73228006                                | 73233238                              | -                              | 1407                                | protein_coding     |          |      |
| protease associated domain containing 1 | [Source:HGNC                          |                                |                                     |                    |          |      |
| Symbol;Acc:HGNC:16047]                  | -                                     | 267                            | 352                                 | 376                | 398      | 348  |
| 508                                     | 9.175260015                           | 10.90202475                    | 12.47497785                         |                    |          |      |
| 15.71813514                             | 15.20311241                           | 16.78806465                    |                                     |                    |          |      |

|                                                             |              |                      |             |                |             |       |
|-------------------------------------------------------------|--------------|----------------------|-------------|----------------|-------------|-------|
| ENSG00000125703                                             | 510.7454993  | 587.3076479          | 404.7255944 |                |             |       |
| 403.3573109                                                 | 340.6036171  | 260.3349306          | 500.9262472 |                |             |       |
| 334.7652862                                                 | 0.582871449  | 0.024713654          | 1           | ATG4C          | 1           |       |
| 62784135                                                    | 62865513     | +                    | 3110        | protein_coding |             |       |
| autophagy related 4C cysteine peptidase [Source:HGNC        |              |                      |             |                |             |       |
| Symbol;Acc:HGNC:16040]                                      | -            | 531                  | 675         | 435            | 366         | 281   |
| 282                                                         | 8.255347299  | 9.458058188          | 6.529424489 |                |             |       |
| 6.539322259                                                 | 5.553839067  | 4.216185763          |             |                |             |       |
| ENSG00000169738                                             | 662.7187364  | 703.899092           | 721.9932442 |                |             |       |
| 996.2705165                                                 | 943.0235377  | 813.3158647          | 696.2036909 |                |             |       |
| 917.5366396                                                 | -0.397643366 | 0.024728649          | 1           | DCXR           | 17          |       |
| 82035136                                                    | 82037732     | -                    | 1902        | protein_coding |             |       |
| dicarbonyl and L-xylulose reductase [Source:HGNC            |              |                      |             |                |             |       |
| Symbol;Acc:HGNC:18985]                                      | -            | 689                  | 809         | 776            | 904         | 778   |
| 881                                                         | 17.51499129  | 18.53517141          | 19.04571339 |                |             |       |
| 26.41009488                                                 | 25.14296232  | 21.53755572          |             |                |             |       |
| ENSG00000123575                                             | 2432.533649  | 2344.880164          | 2087.825825 |                |             |       |
| 1904.375501                                                 | 1957.561714  | 1676.483099          | 2288.413213 |                |             |       |
| 1846.140105                                                 | 0.310262961  | 0.024759063          | 1           | FAM199X        | X           |       |
| 104166620                                                   | 104195902    | +                    | 7457        | protein_coding |             |       |
| "family with sequence similarity 199, X-linked [Source:HGNC |              |                      |             |                |             |       |
| Symbol;Acc:HGNC:25195]"                                     | -            | 2529                 | 2695        | 2244           | 1728        | 1615  |
| 1816                                                        | 16.39781199  | 15.74900875          | 14.04768452 |                |             |       |
| 12.87631637                                                 | 13.31238116  | 11.32355305          |             |                |             |       |
| ENSG00000243402                                             | 25.0082542   | 0                    | 7.443229322 | 0              | 0           |       |
| 0                                                           | 10.81716118  | 0                    | 5.775907793 | 0.024769491    |             |       |
| 1                                                           | AC022973.1   | 8                    | 129864478   | 129865052      |             |       |
| +                                                           | 575          | processed_pseudogene | ribosomal   | protein        | L15         |       |
| (RPL15) pseudogene                                          | -            | 26                   | 0           | 8              | 0           | 0     |
| 0                                                           | 2.186284721  | 0                    | 0.649483583 | 0              | 0           |       |
| 0                                                           |              |                      |             |                |             |       |
| ENSG00000134153                                             | 1049.384821  | 1325.140071          | 1259.766563 |                |             |       |
| 1690.574084                                                 | 1795.138637  | 1286.903877          | 1211.430485 |                |             |       |
| 1590.872199                                                 | -0.392262921 | 0.024809818          | 1           | EMC7           | 15          |       |
| 34084017                                                    | 34101948     | -                    | 1538        | protein_coding |             |       |
| ER membrane protein complex subunit 7 [Source:HGNC          |              |                      |             |                |             |       |
| Symbol;Acc:HGNC:24301]                                      | -            | 1091                 | 1523        | 1354           | 1534        | 1481  |
| 1394                                                        | 34.29806599  | 43.15212286          | 41.09683386 |                |             |       |
| 55.42185628                                                 | 59.18969243  | 42.14416527          |             |                |             |       |
| ENSG00000249915                                             | 2058.371692  | 1863.722936          | 1730.550817 |                |             |       |
| 1486.691291                                                 | 1442.413894  | 1601.706045          | 1884.215148 |                |             |       |
| 1510.27041                                                  | 0.318750343  | 0.024814677          | 1           | PDCD6          | 5           |       |
| 271621                                                      | 353856       | +                    | 9493        | protein_coding | programmed  |       |
| cell death 6 [Source:HGNC Symbol;Acc:HGNC:8765]             |              |                      |             |                |             |       |
| Symbol;Acc:HGNC:8765]                                       | -            | 2140                 | 2142        |                |             |       |
| 1860                                                        | 1349         | 1190                 | 1735        | 10.89962381    | 9.832740629 |       |
| 9.146511804                                                 | 7.896243137  | 7.705322859          | 8.498201343 |                |             |       |
| ENSG00000102900                                             | 2605.667717  | 1971.613526          | 1898.023477 |                |             |       |
| 2705.579777                                                 | 2849.676526  | 2622.73595           | 2158.434907 |                |             |       |
| 2725.997417                                                 | -0.336831547 | 0.02488071           | 0.196055725 |                |             | NUP93 |
| 16                                                          | 56730105     | 56850286             | +           | 11136          |             |       |

|                                  |                                    |                                     |                                      |                  |                    |                |
|----------------------------------|------------------------------------|-------------------------------------|--------------------------------------|------------------|--------------------|----------------|
| protein_coding                   | nucleoporin 93                     | [Source:HGNC Symbol;Acc:HGNC:28958] |                                      |                  |                    |                |
| -                                | 2709                               | 2266                                | 2040                                 | 2455             | 2351               | 2841           |
| 11.76199524                      | 8.867256698                        |                                     | 8.551592171                          |                  | 12.24995005        |                |
| 12.9768943                       | 11.86241271                        |                                     |                                      |                  |                    |                |
| ENSG00000247679                  | 40.3979491                         |                                     | 19.14187889                          |                  | 16.74726597        |                |
| 47.38897368                      | 78.78731356                        |                                     | 84.93196317                          |                  | 25.42903132        |                |
| 70.3694168                       | -1.470998816                       |                                     | 0.024890314                          |                  | 1                  | AC139795.2     |
| 5                                | 177611253                          |                                     | 177619754                            |                  | +                  | 1751           |
| antisense                        | novel transcript                   |                                     | -                                    |                  | 42                 | 22 18          |
| 43                               | 65                                 | 92                                  | 1.159749946                          |                  | 0.547513879        |                |
| 0.479879718                      | 1.364565394                        |                                     | 2.281784211                          |                  | 2.443051935        |                |
| ENSG00000187240                  | 939.7332445                        |                                     | 858.774294                           |                  | 1020.652821        |                |
| 858.5118721                      | 604.8441456                        |                                     | 599.1396098                          |                  | 939.7201197        |                |
| 687.4985425                      | 0.451019993                        |                                     | 0.024899302                          |                  | 1                  | DYNC2H1 11     |
| 103109410                        | 103479863                          |                                     | +                                    |                  | 15012              | protein_coding |
|                                  | dynein cytoplasmic 2 heavy chain 1 | [Source:HGNC                        |                                      |                  |                    |                |
| Symbol;Acc:HGNC:2962]            | -                                  | 977                                 | 987                                  | 1097             | 779                | 499            |
| 649                              | 3.146713653                        |                                     | 2.865082914                          |                  | 3.411254391        |                |
| 2.883440178                      | 2.043192803                        |                                     | 2.010190236                          |                  |                    |                |
| ENSG00000228261                  | 15.3896949                         |                                     | 11.31111026                          |                  | 0.930403665        | 0              |
| 0                                | 0                                  | 9.210402938                         | 0                                    |                  | 5.545003503        |                |
| 0.024918374                      | 1                                  | AL162742.1                          | 10                                   |                  | 104323369          |                |
| 104327004                        | +                                  | 954                                 | lincRNA uncharacterized LOC101927472 |                  |                    |                |
| [Source:NCBI gene;Acc:101927472] |                                    |                                     | -                                    |                  | 16                 | 13 1           |
| 0                                | 0                                  | 0                                   | 0.810910314                          |                  | 0.593818297        |                |
| 0.048932529                      | 0                                  | 0                                   | 0                                    |                  |                    |                |
| ENSG00000260194                  | 0.961855931                        |                                     | 17.40170808                          |                  | 9.304036652        | 0              |
| 0                                | 0                                  | 9.222533556                         | 0                                    |                  | 5.548241239        |                |
| 0.024938838                      | 1                                  | AC007496.1                          | 16                                   |                  | 53998313           |                |
| 53999969                         | -                                  | 739                                 | antisense                            |                  | "novel transcript, |                |
| antisense to FTO"                |                                    | -                                   | 1                                    | 20               | 10                 | 0 0            |
| 0                                | 0.065426965                        |                                     | 1.17935392                           |                  | 0.631686503        | 0              |
| 0                                | 0                                  |                                     |                                      |                  |                    |                |
| ENSG00000279344                  | 23.08454234                        |                                     | 4.350427021                          |                  | 0.930403665        | 0              |
| 0                                | 0                                  | 9.455124343                         | 0                                    |                  | 5.581816736        |                |
| 0.024944977                      | 1                                  | AC007342.6                          | 16                                   |                  | 53478957           |                |
| 53481550                         | -                                  | 2594                                | TEC                                  | novel transcript |                    | -              |
| 24                               | 5                                  | 1                                   | 0                                    | 0                | 0                  | 0.447344896    |
| 0.083996005                      | 0.017996003                        |                                     | 0                                    |                  | 0                  | 0              |
| ENSG00000251323                  | 2.885567793                        |                                     | 0.870085404                          |                  | 25.12089896        | 0              |
| 0                                | 0                                  | 9.625517386                         | 0                                    |                  | 5.608249357        |                |
| 0.024998133                      | 1                                  | AP003086.1                          | 11                                   |                  | 78423982           |                |
| 78429836                         | -                                  | 1642                                | lincRNA uncharacterized LOC101928865 |                  |                    |                |
| [Source:NCBI gene;Acc:101928865] |                                    |                                     | -                                    |                  | 3                  | 1 27           |
| 0                                | 0                                  | 0                                   | 0.088338357                          |                  | 0.026539054        |                |
| 0.767602971                      | 0                                  | 0                                   | 0                                    |                  |                    |                |
| ENSG00000106261                  | 1995.851057                        |                                     | 1670.563976                          |                  | 1871.041771        |                |
| 1531.876126                      | 1432.716994                        |                                     | 1479.847141                          |                  | 1845.818935        |                |
| 1481.480087                      | 0.316994783                        |                                     | 0.025001081                          |                  | 1                  | ZKSCAN1 7      |
| 100015572                        | 100041689                          |                                     | +                                    |                  | 10319              | protein_coding |

|                        |                                                         |             |                      |                    |                |      |             |
|------------------------|---------------------------------------------------------|-------------|----------------------|--------------------|----------------|------|-------------|
|                        | zinc finger with KRAB and SCAN domains 1 [Source:HGNC   |             |                      |                    |                |      |             |
| Symbol;Acc:HGNC:13101] | zf-C2H2                                                 | 2075        | 1920                 | 2011               | 1390           | 1182 |             |
|                        | 1603                                                    | 9.722584024 | 8.108158205          | 9.097467106        |                |      |             |
| 7.484955651            | 7.040884567                                             | 7.223154894 |                      |                    |                |      |             |
| ENSG00000239288        | 6.732991517                                             | 1.740170808 |                      | 18.6080733         |                | 0    |             |
|                        | 0                                                       | 9.027078543 | 0                    | 5.51547432         |                |      |             |
| 0.025150938            | 1                                                       | AC063923.1  | 3                    | 109241507          |                |      |             |
| 109243125              | +                                                       | 1619        | processed_pseudogene | bromodomain        |                |      |             |
| containing 7 (BRD7)    | pseudogene                                              | -           | 7                    | 2                  | 20             | 0    |             |
|                        | 0                                                       | 0.209051076 | 0.053832152          | 0.576672422        |                |      |             |
|                        | 0                                                       | 0           |                      |                    |                |      |             |
| ENSG00000273893        | 78.87218634                                             | 47.85469723 |                      | 40.93776127        |                |      |             |
| 101.3903623            | 128.4839267                                             | 122.7820772 |                      | 55.88821495        |                |      |             |
| 117.5521221            | -1.073727587                                            | 0.02520129  |                      | 1                  | AL133520.1     |      |             |
|                        | 20                                                      | 46681676    | 46682375             | -                  | 700            |      |             |
| sense_intronic         | "novel transcript, sense intronic to SLC13A3"           |             |                      |                    |                | -    |             |
|                        | 82                                                      | 55          | 44                   | 92                 | 106            | 133  | 5.663918935 |
|                        | 3.423917149                                             | 2.934274046 | 7.303008918          | 9.307974513        |                |      |             |
|                        | 8.834553785                                             |             |                      |                    |                |      |             |
| ENSG00000197081        | 2649.91309                                              | 1868.943448 |                      | 2415.327915        |                |      |             |
| 2032.215523            | 1728.472448                                             | 1618.323168 |                      | 2311.394818        |                |      |             |
| 1793.003713            | 0.366397326                                             | 0.025207431 |                      | 1                  | IGF2R          | 6    |             |
|                        | 159969099                                               | 160113507   | +                    | 17843              | protein_coding |      |             |
|                        | insulin like growth factor 2 receptor [Source:HGNC      |             |                      |                    |                |      |             |
| Symbol;Acc:HGNC:5467]  | -                                                       | 2755        | 2148                 | 2596               | 1844           | 1426 |             |
|                        | 1753                                                    | 7.465432004 | 5.245960296          | 6.791768095        |                |      |             |
| 5.742553962            | 4.912459809                                             | 4.568199466 |                      |                    |                |      |             |
| ENSG00000259563        | 16.35155083                                             | 5.220512425 |                      | 4.652018326        |                | 0    |             |
|                        | 0                                                       | 8.741360526 | 0                    | 5.468861267        |                |      |             |
| 0.025214522            | 1                                                       | AC025430.1  | 15                   | 44516650           |                |      |             |
| 44517483               | -                                                       | 498         | antisense            | "novel transcript, |                |      |             |
| antisense to CTDSPL2"  | -                                                       | 17          | 6                    | 5                  | 0              | 0    |             |
|                        | 0                                                       | 1.650520015 | 0.525025631          | 0.46869109         |                | 0    |             |
|                        | 0                                                       | 0           |                      |                    |                |      |             |
| ENSG00000147481        | 16.35155083                                             | 5.220512425 |                      | 4.652018326        |                | 0    |             |
|                        | 0                                                       | 8.741360526 | 0                    | 5.468861267        |                |      |             |
| 0.025214522            | 1                                                       | SNTG1       | 8                    | 49909789           | 50796691       |      |             |
|                        | +                                                       | 10599       | protein_coding       | syntrophin gamma 1 |                |      |             |
| [Source:HGNC           | Symbol;Acc:HGNC:13740]                                  | -           | 17                   | 6                  | 5              |      |             |
|                        | 0                                                       | 0           | 0.077550615          | 0.024668626        |                |      |             |
| 0.022021716            | 0                                                       | 0           | 0                    |                    |                |      |             |
| ENSG00000130066        | 355.8866945                                             | 491.5982534 |                      | 508.9308049        |                |      |             |
| 502.5435349            | 848.4787614                                             | 645.2982854 |                      | 452.1385842        |                |      |             |
| 665.4401939            | -0.556681564                                            | 0.02524277  |                      | 1                  | SAT1           | X    |             |
|                        | 23783173                                                | 23786226    | +                    | 2498               | protein_coding |      |             |
|                        | spermidine/spermine N1-acetyltransferase 1 [Source:HGNC |             |                      |                    |                |      |             |
| Symbol;Acc:HGNC:10540] | -                                                       | 370         | 565                  | 547                | 456            | 700  |             |
|                        | 699                                                     | 7.161607355 | 9.856315835          | 10.2221189         |                |      |             |
| 10.14342103            | 17.22475154                                             | 13.01115228 |                      |                    |                |      |             |
| ENSG00000238121        | 0                                                       | 0           | 1.86080733           | 0                  | 38.78760052    |      |             |

|                                           |                                      |                                     |                              |                |             |             |
|-------------------------------------------|--------------------------------------|-------------------------------------|------------------------------|----------------|-------------|-------------|
| 10.15490864                               | 0.62026911                           | 16.31416972                         | -4.72055407                  |                |             |             |
| 0.025254161                               | 1                                    | LINC00426                           | 13                           | 30340270       |             |             |
| 30377145                                  | -                                    | 3972                                | lincRNA long intergenic non- |                |             |             |
| protein coding RNA 426                    | [Source:HGNC Symbol;Acc:HGNC:42761]  |                                     |                              |                |             | -           |
| 0                                         | 0                                    | 2                                   | 0                            | 32             | 11          | 0           |
| 0.023505354                               | 0                                    | 0.495208509                         | 0.128769931                  |                |             |             |
| ENSG00000229119                           | 257.7773895                          | 188.8085327                         | 261.4434299                  |                |             |             |
| 250.1696983                               | 545.4506323                          | 368.3462316                         | 236.009784                   |                |             |             |
| 387.9888541                               | -0.716674138                         | 0.025260884                         | 1                            | AC026403.1     |             |             |
| 5                                         | 166382305                            | 166382599                           | +                            | 295            |             |             |
| processed_pseudogene                      | 60S acidic ribosomal protein (RPLP0) |                                     |                              |                |             |             |
| pseudogene                                | -                                    | 268                                 | 217                          | 281            | 227         | 450         |
|                                           |                                      |                                     |                              |                |             | 399         |
| 43.92522498                               | 32.05503944                          | 44.46623304                         | 42.75785251                  |                |             |             |
| 93.76437389                               | 62.89004389                          |                                     |                              |                |             |             |
| ENSG00000260279                           | 173.1340676                          | 124.4222128                         | 148.8645864                  |                |             |             |
| 72.73656426                               | 16.96957523                          | 98.77956586                         | 148.8069556                  |                |             |             |
| 62.82856845                               | 1.237573684                          | 0.025300113                         | 1                            | AC137932.1     |             |             |
| 16                                        | 89296128                             | 89298317                            | +                            | 1576           |             |             |
| antisense                                 | uncharacterized LOC105371414         | [Source:NCBI                        |                              |                |             |             |
| gene;Acc:105371414]                       | -                                    | 180                                 | 143                          | 160            | 66          | 14          |
| 107                                       | 5.522268368                          | 3.954015997                         | 4.739252036                  |                |             |             |
| 2.327018125                               | 0.546033367                          | 3.1568837                           |                              |                |             |             |
| ENSG00000143549                           | 14471.12248                          | 15015.06382                         | 15480.05618                  |                |             |             |
| 17908.62378                               | 18925.92483                          | 16044.75565                         | 14988.74749                  |                |             |             |
| 17626.43475                               | -0.233772338                         | 0.025336634                         | 0.198795128                  |                |             | TPM3        |
| 1                                         | 154155304                            | 154194648                           | -                            | 8389           |             |             |
| protein_coding                            | tropomyosin 3                        | [Source:HGNC Symbol;Acc:HGNC:12012] |                              |                |             |             |
| -                                         | 15045                                | 17257                               | 16638                        | 16250          | 15614       | 17380       |
| 86.71280083                               | 89.64244686                          | 92.58421772                         | 107.6354212                  |                |             |             |
| 114.4066689                               | 96.33200418                          |                                     |                              |                |             |             |
| ENSG00000273319                           | 0                                    | 0                                   | 0                            | 8.816553243    | 6.060562582 |             |
| 9.231735127                               | 0                                    | 8.036283651                         | -5.570401981                 |                |             |             |
| 0.025343548                               | 1                                    | AC058791.1                          | 7                            | 130936464      |             |             |
| 130939661                                 | +                                    | 3198                                | lincRNA novel transcript     |                |             | -           |
| 0                                         | 0                                    | 0                                   | 8                            | 5              | 10          | 0           |
| 0                                         | 0.139002807                          | 0.096103434                         | 0.145396033                  |                |             |             |
| ENSG00000275131                           | 330.8784402                          | 200.9897284                         | 244.6961639                  |                |             |             |
| 144.3710594                               | 122.4233641                          | 190.1737436                         | 258.8547775                  |                |             |             |
| 152.3227224                               | 0.762069122                          | 0.025433567                         | 1                            | AC241952.1     |             |             |
| 1                                         | 120489860                            | 120701289                           | -                            | 9444           |             |             |
| transcribed_unprocessed_pseudogene        | phosphodiesterase 4D                 |                                     |                              |                |             |             |
| interacting protein-like                  | [Source:NCBI gene;Acc:100996724]     |                                     |                              |                |             | -           |
| 344                                       | 231                                  | 263                                 | 131                          | 101            | 206         | 1.761179739 |
| 1.065895428                               | 1.300007345                          | 0.77077454                          | 0.657374352                  |                |             |             |
| 1.014243563                               |                                      |                                     |                              |                |             |             |
| ENSG00000118985                           | 1616.87982                           | 2070.803262                         | 1991.994247                  |                |             |             |
| 2168.872098                               | 2678.768661                          | 2326.397252                         | 1893.225776                  |                |             |             |
| 2391.346004                               | -0.336595276                         | 0.025445238                         | 1                            | ELL2           | 5           |             |
| 95885098                                  | 95962071                             | -                                   | 7328                         | protein_coding |             |             |
| elongation factor for RNA polymerase II 2 | [Source:HGNC                         |                                     |                              |                |             |             |

|                                                             |                                          |                |                             |                |             |             |
|-------------------------------------------------------------|------------------------------------------|----------------|-----------------------------|----------------|-------------|-------------|
| Symbol;Acc:HGNC:17064]                                      | -                                        | 1681           | 2380                        | 2141           | 1968        | 2210        |
| 2520                                                        | 11.09132597                              | 14.15305173    | 13.63883397                 |                |             |             |
| 14.92284668                                                 | 18.53762845                              | 15.98991291    |                             |                |             |             |
| ENSG00000118263                                             | 1073.431219                              | 988.4170192    | 879.2314636                 |                |             |             |
| 732.8759884                                                 | 766.0551103                              | 756.0791069    | 980.3599006                 |                |             |             |
| 751.6700685                                                 | 0.38318431                               | 0.025481035    | 1                           | KLF7           | 2           |             |
| 207074137                                                   | 207167267                                | -              | 9262                        | protein_coding |             |             |
| Kruppel like factor 7 [Source:HGNC Symbol;Acc:HGNC:6350]    |                                          |                |                             |                |             |             |
| zf-C2H2                                                     | 1116 1136                                | 945 665        | 632 819                     |                |             |             |
| 5.825867921                                                 | 5.344808537                              | 4.762917595    | 3.989595931                 |                |             |             |
| 4.194301655                                                 | 4.111593239                              |                |                             |                |             |             |
| ENSG00000123892                                             | 9.618559309                              | 10.44102485    | 5.582421991                 | 0              |             |             |
| 0                                                           | 0                                        | 8.547335384    | 0                           | 5.437486046    |             |             |
| 0.025564647                                                 | 1                                        | RAB38 11       | 88113242                    | 88175467       |             |             |
| -                                                           | 1465                                     | protein_coding | "RAB38, member RAS oncogene |                |             |             |
| family [Source:HGNC Symbol;Acc:HGNC:9776]"                  |                                          |                | -                           | 10             | 12          |             |
| 6                                                           | 0                                        | 0              | 0                           | 0.33003773     | 0.356945753 |             |
| 0.191187574                                                 | 0                                        | 0              | 0                           |                |             |             |
| ENSG00000151287                                             | 380.8949487                              | 354.1247595    | 388.908732                  |                |             |             |
| 492.6249125                                                 | 524.8447196                              | 544.6723725    | 374.6428134                 |                |             |             |
| 520.7140015                                                 | -0.475336704                             | 0.025590763    | 1                           | TEX30          | 13          |             |
| 102765990                                                   | 102773811                                | -              | 2154                        | protein_coding |             |             |
| testis expressed 30 [Source:HGNC Symbol;Acc:HGNC:25188]     |                                          |                |                             |                |             |             |
| 396                                                         | 407                                      | 418            | 447                         | 433            | 590         | 8.888954915 |
| 8.233932606                                                 | 9.058924052                              | 11.53118309    | 12.35633168                 |                |             |             |
| 12.73612553                                                 |                                          |                |                             |                |             |             |
| ENSG00000199473                                             | 0                                        | 0              | 0                           | 0              | 36.92694051 |             |
| 0                                                           | 12.30898017                              | -6.18856777    | 0.025605692                 | 1              |             |             |
| RF00092                                                     | 7                                        | 17373201       | 17373326                    | -              | 126         |             |
| snoRNA                                                      | -                                        | 0              | 0                           | 0              | 0           | 0           |
| 40                                                          | 0                                        | 0              | 0                           | 0              | 14.76115921 |             |
| ENSG00000233762                                             | 282.7856437                              | 335.852966     | 468.9234473                 |                |             |             |
| 543.3200936                                                 | 406.057693                               | 722.8448605    | 362.5206857                 |                |             |             |
| 557.407549                                                  | -0.621897251                             | 0.025633412    | 1                           | AC007969.1     |             |             |
| 2                                                           | 171517270                                | 171517716      | -                           | 447            |             |             |
| processed_pseudogene                                        | ribosomal protein S15 (RPS15) pseudogene |                |                             |                |             |             |
| -                                                           | 294                                      | 386            | 504                         | 493            | 335         | 783         |
| 31.80101808                                                 | 37.63036053                              | 52.63432395    | 61.28461185                 |                |             |             |
| 46.06643923                                                 | 81.44890632                              |                |                             |                |             |             |
| ENSG00000141503                                             | 2455.618192                              | 2663.331422    | 3013.577472                 |                |             |             |
| 1744.575473                                                 | 2117.560566                              | 2506.416087    | 2710.842362                 |                |             |             |
| 2122.850709                                                 | 0.352346893                              | 0.025678051    | 0.200616599                 | MINK1          |             |             |
| 17                                                          | 4833388                                  | 4898061 +      | 7817                        | protein_coding |             |             |
| misshapen like kinase 1 [Source:HGNC Symbol;Acc:HGNC:17565] |                                          |                |                             |                |             |             |
| 2553                                                        | 3061                                     | 3239           | 1583                        | 1747           | 2715        | 15.79108311 |
| 17.06403823                                                 | 19.34269001                              | 11.2525991     | 13.73726111                 |                |             |             |
| 16.1495617                                                  |                                          |                |                             |                |             |             |
| ENSG00000237382                                             | 0                                        | 5.220512425    | 26.98170629                 | 0              | 0           |             |
| 0                                                           | 10.73407291                              | 0              | 5.765973482                 | 0.025927575    |             |             |
| 1                                                           | RPL21P121                                | 17             | 18312760                    | 18313533       |             |             |



|                                                 |                                                   |                                |                                    |                       |                |             |
|-------------------------------------------------|---------------------------------------------------|--------------------------------|------------------------------------|-----------------------|----------------|-------------|
|                                                 | +                                                 | 465                            | processed_pseudogene               | ribosomal protein L21 |                |             |
| pseudogene 121                                  | [Source:HGNC Symbol;Acc:HGNC:36429]               | -                              | 0                                  |                       |                |             |
| 6                                               | 29                                                | 0                              | 0                                  | 0                     | 0              | 0.562285514 |
|                                                 | 2.911327622                                       | 0                              | 0                                  | 0                     |                |             |
| ENSG00000279897                                 | 31.74124572                                       | 0                              | 1.86080733                         | 0                     | 0              |             |
| 0                                               | 11.20068435                                       | 0                              | 5.826080096                        | 0.025949518           |                |             |
| 1                                               | BIRC6-AS2                                         | 2                              | 32557273                           | 32574818              |                |             |
|                                                 | -                                                 | 1066                           | transcribed_unprocessed_pseudogene | BIRC6                 |                |             |
| antisense RNA 2                                 | [Source:HGNC Symbol;Acc:HGNC:50490]               | -                              | 33                                 |                       |                |             |
| 0                                               | 2                                                 | 0                              | 0                                  | 0                     | 1.496779932    | 0           |
|                                                 | 0.0875828                                         | 0                              | 0                                  | 0                     |                |             |
| ENSG00000251667                                 | 31.74124572                                       | 0                              | 1.86080733                         | 0                     | 0              |             |
| 0                                               | 11.20068435                                       | 0                              | 5.826080096                        | 0.025949518           |                |             |
| 1                                               | BRCC3P1 5                                         | 176308063                      | 176309013                          | +                     |                |             |
| 951                                             | processed_pseudogene                              | BRCA1/BRCA2-containing complex |                                    |                       |                |             |
| subunit 3                                       | pseudogene 1 [Source:HGNC Symbol;Acc:HGNC:51444]  | -                              |                                    |                       |                |             |
| 33                                              | 0                                                 | 2                              | 0                                  | 0                     | 0              | 1.677778557 |
|                                                 | 0                                                 | 0.09817378                     | 0                                  | 0                     | 0              |             |
| ENSG00000125835                                 | 4366.825926                                       | 4509.65265                     | 4589.68128                         |                       |                |             |
| 5153.275371                                     | 5322.386059                                       | 5379.332059                    | 4488.719952                        |                       |                |             |
| 5284.99783                                      | -0.235611168                                      | 0.025965313                    | 0.201151678                        | SNRPB                 |                |             |
| 20                                              | 2461634                                           | 2470853                        | -                                  | 1278                  | protein_coding | small       |
| nuclear ribonucleoprotein polypeptides B and B1 | [Source:HGNC Symbol;Acc:HGNC:11153]               | -                              | 4540                               | 5183                  | 4933           | 4676        |
|                                                 | 5827                                              | 171.7616548                    | 176.7294609                        | 180.1881795           |                | 4391        |
| 203.3085731                                     | 211.1932062                                       | 212.0045503                    |                                    |                       |                |             |
| ENSG00000080824                                 | 36418.75111                                       | 31434.44548                    | 31767.70274                        |                       |                |             |
| 42751.46668                                     | 38182.75638                                       | 36757.99976                    | 33206.96645                        |                       |                |             |
| 39230.74094                                     | -0.240497356                                      | 0.025965658                    | 0.201151678                        |                       |                |             |
| HSP90AA1                                        | 14                                                | 102080738                      | 102139699                          | -                     | 5248           |             |
| member 1                                        | [Source:HGNC Symbol;Acc:HGNC:5253]                | -                              | 37863                              | 36128                 |                |             |
| 34144                                           | 38792                                             | 31501                          | 39817                              | 348.8368945           | 299.9913218    |             |
|                                                 | 303.7152557                                       | 410.7337482                    | 368.9588012                        | 352.7814386           |                |             |
| ENSG00000281189                                 | 0                                                 | 24.36239132                    | 7.443229322                        | 0                     | 0              |             |
| 0                                               | 10.60187355                                       | 0                              | 5.749381872                        | 0.026008345           |                |             |
| 1                                               | GHET1                                             | 7                              | 148987527                          | 148989432             | +              |             |
| 1906                                            | lincRNA gastric carcinoma proliferation enhancing |                                |                                    |                       |                |             |
| transcript 1                                    | [Source:HGNC Symbol;Acc:HGNC:49425]               | -                              | 0                                  |                       |                |             |
| 28                                              | 8                                                 | 0                              | 0                                  | 0                     | 0.640167663    |             |
|                                                 | 0.195935499                                       | 0                              | 0                                  | 0                     |                |             |
| ENSG00000085552                                 | 107.7278643                                       | 38.28375779                    | 42.7985686                         |                       |                |             |
| 13.22482987                                     | 19.39380026                                       | 28.61837889                    | 62.93673022                        |                       |                |             |
| 20.41233634                                     | 1.618889202                                       | 0.026008402                    | 1                                  | IGSF9                 | 1              |             |
|                                                 | 159927039                                         | 159945604                      | -                                  | 6628                  | protein_coding |             |
| immunoglobulin superfamily member 9             | [Source:HGNC Symbol;Acc:HGNC:18132]               | -                              | 112                                | 44                    | 46             | 12          |
|                                                 | 31                                                | 0.817027622                    | 0.289286905                        | 0.323982362           |                | 16          |
| 0.100602967                                     | 0.148383238                                       | 0.217475437                    |                                    |                       |                |             |
| ENSG00000138336                                 | 110.6134321                                       | 60.9059783                     | 67.91946756                        |                       |                |             |

|                                                            |                |                              |                          |                |             |
|------------------------------------------------------------|----------------|------------------------------|--------------------------|----------------|-------------|
| 30.85793635                                                | 39.99971304    | 26.77203187                  | 79.8129593               |                |             |
| 32.54322709                                                | 1.296887519    | 0.026078329                  | 1                        | TET1           | 10          |
| 68560656                                                   | 68694482       | +                            | 9288                     | protein_coding |             |
| tet methylcytosine dioxygenase 1 [Source:HGNC              |                |                              |                          |                |             |
| Symbol;Acc:HGNC:29484]                                     | -              | 115                          | 70                       | 73             | 28 33       |
| 29                                                         | 0.598655325    | 0.328423656                  | 0.366899136              |                |             |
| 0.16751275                                                 | 0.218393191    | 0.145180006                  |                          |                |             |
| ENSG00000187522                                            | 464.5764146    | 542.0632068                  | 420.5424567              |                |             |
| 661.2414933                                                | 641.2075211    | 648.9909794                  | 475.7273594              |                |             |
| 650.4799979                                                | -0.451087163   | 0.026080736                  | 1                        | HSPA14         | 10          |
| 14838164                                                   | 14871741       | +                            | 2644                     | protein_coding |             |
| heat shock protein family A (Hsp70) member 14 [Source:HGNC |                |                              |                          |                |             |
| Symbol;Acc:HGNC:29526]                                     | -              | 483                          | 623                      | 452            | 600 529     |
| 703                                                        | 8.832566104    | 10.26798424                  | 7.980369862              |                |             |
| 12.60961548                                                | 12.29820085    | 12.36302912                  |                          |                |             |
| ENSG00000253471                                            | 4.809279655    | 8.700854042                  | 12.09524765              |                | 0           |
| 0                                                          | 0              | 8.535127115                  | 0                        | 5.435513783    |             |
| 0.026087099                                                | 1              | AC012574.1                   | 8                        | 23707141       |             |
| 23789487                                                   | +              | 252                          | lincRNA novel transcript |                | -           |
| 5                                                          | 10             | 13                           | 0                        | 0              | 0.959335863 |
| 1.729251085                                                | 2.408179457    | 0                            | 0                        | 0              |             |
| ENSG00000063177                                            | 20364.41377    | 20955.13688                  | 24467.75559              |                |             |
| 22748.91151                                                | 27637.37748    | 29007.95812                  | 21929.10208              |                |             |
| 26464.74904                                                | -0.27124712    | 0.026156534                  | 0.201749092              |                | RPL18       |
| 19                                                         | 48615328       | 48619536                     | -                        | 4209           |             |
| protein_coding ribosomal protein L18 [Source:HGNC          |                |                              |                          |                |             |
| Symbol;Acc:HGNC:10310]                                     | -              | 21172                        | 24084                    | 26298          | 20642 22801 |
| 31422                                                      | 243.2115391    | 249.3493788                  | 291.6687035              |                |             |
| 272.511536                                                 | 332.9832049    | 347.1250191                  |                          |                |             |
| ENSG00000118473                                            | 2.885567793    | 6.09059783                   | 1.86080733               |                |             |
| 30.85793635                                                | 32.72703794    | 7.385388102                  | 3.612324318              |                |             |
| 23.65678746                                                | -2.702292464   | 0.02618419                   | 1                        | SGIP1          | 1           |
| 66533383                                                   | 66748299       | +                            | 10477                    | protein_coding |             |
| SH3 domain GRB2 like endophilin interacting protein 1      |                |                              |                          |                |             |
| [Source:HGNC Symbol;Acc:HGNC:25412]                        | -              |                              | 3                        | 7              | 2           |
| 28                                                         | 27             | 8                            | 0.013844763              | 0.029115194    |             |
| 0.008911259                                                | 0.148502283    | 0.158406931                  | 0.035504554              |                |             |
| ENSG00000143575                                            | 2007.393328    | 1952.471647                  | 2018.975953              |                |             |
| 2084.012773                                                | 2637.556835    | 2736.286292                  | 1992.946976              |                |             |
| 2485.951967                                                | -0.319067287   | 0.026277624                  | 1                        | HAX1           | 1           |
| 154272511                                                  | 154275875      | +                            | 2155                     | protein_coding |             |
| HCLS1 associated protein X-1 [Source:HGNC                  |                |                              |                          |                |             |
| Symbol;Acc:HGNC:16915]                                     | -              | 2087                         | 2244                     | 2170           | 1891 2176   |
| 2964                                                       | 46.82484959    | 45.37683238                  | 47.00656271              |                |             |
| 48.7591693                                                 | 62.06674596    | 63.95315037                  |                          |                |             |
| ENSG00000163354                                            | 0              | 4.350427021                  | 27.91210996              | 0              | 0           |
| 0                                                          | 10.75417899    | 0                            | 5.768616295              | 0.02628403     |             |
| 1                                                          | DCST2          | 1                            | 155018520                | 155033781      | -           |
| 3071                                                       | protein_coding | DC-STAMP domain containing 2 |                          |                |             |
| [Source:HGNC Symbol;Acc:HGNC:26562]                        | -              |                              | 0                        | 5              | 30          |

|                                         |                                  |                        |               |                  |             |             |
|-----------------------------------------|----------------------------------|------------------------|---------------|------------------|-------------|-------------|
| 0                                       | 0                                | 0                      | 0             | 0.07094941       | 0.456023763 |             |
| 0                                       | 0                                | 0                      |               |                  |             |             |
| ENSG0000052344                          | 10.58041524                      | 20.8820497             | 0             | 0                | 0           |             |
| 0                                       | 10.48748831                      | 0                      | 5.733151275   | 0.026300911      |             |             |
| 1                                       | PRSS8                            | 16                     | 31131433      | 31135762         | -           |             |
| 3010                                    | protein_coding                   | serine protease        | 8             | [Source:HGNC     |             |             |
| Symbol;Acc:HGNC:9491]                   | -                                | 11                     | 24            | 0                | 0           | 0           |
| 0                                       | 0.17669628                       | 0.347458823            | 0             | 0                | 0           |             |
| 0                                       |                                  |                        |               |                  |             |             |
| ENSG00000103150                         | 581.9228382                      | 509.8700469            | 624.3008593   |                  |             |             |
| 346.0497148                             | 351.5126297                      | 496.6673498            | 572.0312482   |                  |             |             |
| 398.0765648                             | 0.52117342                       | 0.026331306            | 1             | MLYCD            | 16          |             |
| 83899126                                | 83927026                         | +                      | 16161         | protein_coding   |             |             |
| malonyl-CoA decarboxylase               | [Source:HGNC                     | Symbol;Acc:HGNC:7150]  |               |                  |             |             |
| -                                       | 605                              | 586                    | 671           | 314              | 290         | 538         |
| 1.810040785                             | 1.580112408                      | 1.93820775             | 1.079626315   |                  |             |             |
| 1.103004103                             | 1.54790771                       |                        |               |                  |             |             |
| ENSG00000241697                         | 0.961855931                      | 12.18119566            | 13.95605498   | 0                |             |             |
| 0                                       | 0                                | 9.033035523            | 0             | 5.517806468      |             |             |
| 0.026366489                             | 1                                | TMEFF1                 | 9             | 100473113        | 100577636   |             |
| +                                       | 2611                             | protein_coding         | transmembrane | protein with EGF |             |             |
| like and two follistatin like domains 1 | [Source:HGNC                     |                        |               |                  |             |             |
| Symbol;Acc:HGNC:11866]                  | -                                | 1                      | 14            | 15               | 0           | 0           |
| 0                                       | 0.018518011                      | 0.233657519            | 0.268182493   | 0                |             |             |
| 0                                       | 0                                |                        |               |                  |             |             |
| ENSG00000271425                         | 155.8206608                      | 110.5008463            | 162.8206414   |                  |             |             |
| 105.7986389                             | 52.1208382                       | 52.62089023            | 143.0473829   |                  |             |             |
| 70.18012245                             | 1.027736415                      | 0.026391889            | 1             | NBPF10           | 1           |             |
| 146064699                               | 146144804                        | -                      | 13249         | protein_coding   |             |             |
| NBPF member 10                          | [Source:HGNC                     | Symbol;Acc:HGNC:31992] |               |                  |             |             |
| 162                                     | 127                              | 175                    | 96            | 43               | 57          | 0.591198238 |
| 0.41771418                              | 0.6165964                        | 0.40262448             | 0.199495322   |                  |             |             |
| 0.20004273                              |                                  |                        |               |                  |             |             |
| ENSG00000105426                         | 810.8445498                      | 587.3076479            | 643.8393363   |                  |             |             |
| 474.991806                              | 482.4207815                      | 521.5930347            | 680.6638447   |                  |             |             |
| 493.0018741                             | 0.464634777                      | 0.026423675            | 1             | PTPRS            | 19          |             |
| 5158495                                 | 5340803                          | -                      | 8565          | protein_coding   | "protein    |             |
| tyrosine phosphatase, receptor type S   | [Source:HGNC                     |                        |               |                  |             |             |
| Symbol;Acc:HGNC:9681]"                  | -                                | 843                    | 675           | 692              | 431         | 398         |
| 565                                     | 4.758843511                      | 3.434274485            | 3.771592496   |                  |             |             |
| 2.796159535                             | 2.856295035                      | 3.067270648            |               |                  |             |             |
| ENSG00000004142                         | 4066.726876                      | 4114.633877            | 3933.746696   |                  |             |             |
| 4206.597966                             | 4981.782442                      | 5598.124181            | 4038.36915    |                  |             |             |
| 4928.834863                             | -0.287651643                     | 0.026463676            | 0.201749092   |                  |             |             |
| POLDIP2                                 | 17                               | 28347177               | 28357522      | -                | 2121        |             |
| protein_coding                          | DNA polymerase delta interacting | protein 2              |               |                  |             |             |
| [Source:HGNC                            | Symbol;Acc:HGNC:23781]           | -                      | 4228          | 4729             | 4228        |             |
| 3817                                    | 4110                             | 6064                   | 96.38190959   | 97.15994119      |             |             |
| 93.05513552                             | 99.99851141                      | 119.1100792            | 132.9381229   |                  |             |             |
| ENSG00000232352                         | 16.35155083                      | 6.960683234            | 2.791210996   | 0                |             |             |

|                         |                       |                        |              |                        |       |
|-------------------------|-----------------------|------------------------|--------------|------------------------|-------|
| 0                       | 0                     | 8.701148352            | 0            | 5.462415062            |       |
| 0.026508719             | 1                     | SEMA3B-AS1             | 3            | 50266641               |       |
| 50267371                | -                     | 338                    | antisense    | SEMA3B antisense RNA 1 |       |
| (head to head)          | [Source:HGNC          | Symbol;Acc:HGNC:49096] | -            | 17                     |       |
| 8                       | 3                     | 0                      | 0            | 2.431831264            |       |
| 1.031411298             | 0.414334017           | 0                      | 0            | 0                      |       |
| ENSG00000076108         | 1817.907709           | 1322.529814            | 1751.950102  |                        |       |
| 1368.769891             | 1175.749141           | 1237.052507            | 1630.795875  |                        |       |
| 1260.523846             | 0.371256447           | 0.026543128            | 1            | BAZ2A                  | 12    |
| 56595596                | 56636816              | -                      | 10918        | protein_coding         |       |
| bromodomain adjacent to | zinc finger domain 2A | [Source:HGNC           |              |                        |       |
| Symbol;Acc:HGNC:962]    | MBD                   | 1890                   | 1520         | 1883                   | 1242  |
| 1340                    | 8.369893475           | 6.066791865            | 8.051063757  |                        |       |
| 6.321069269             | 5.461048135           | 5.706800972            |              |                        |       |
| ENSG00000160410         | 2474.85531            | 2562.401515            | 2352.990869  |                        |       |
| 2803.663931             | 2995.130028           | 3116.633779            | 2463.415898  |                        |       |
| 2971.809246             | -0.270758862          | 0.026620421            | 0.201749092  | SHKBP1                 |       |
| 19                      | 40576851              | 40591399               | +            | 3936                   |       |
| protein_coding          | SH3KBP1 binding       | protein 1              | [Source:HGNC |                        |       |
| Symbol;Acc:HGNC:19214]  | -                     | 2573                   | 2945         | 2529                   | 2544  |
| 3376                    | 31.60719188           | 32.60534554            | 29.99437214  |                        | 2471  |
| 35.91485033             | 38.58913253           | 39.88213198            |              |                        |       |
| ENSG00000105372         | 23467.361             | 28113.3295             | 28070.27858  |                        |       |
| 26732.8915              | 34245.81492           | 36204.09565            | 26550.32303  |                        |       |
| 32394.26736             | -0.287016575          | 0.026621236            | 0.201749092  | RPS19                  |       |
| 19                      | 41859918              | 41872926               | +            | 3799                   |       |
| protein_coding          | ribosomal protein S19 | [Source:HGNC           |              |                        |       |
| Symbol;Acc:HGNC:10402]  | -                     | 24398                  | 32311        | 30170                  | 24257 |
| 39217                   | 310.5175493           | 370.6292608            | 370.7251525  |                        | 28253 |
| 354.7969177             | 457.1330657           | 479.994314             |              |                        |       |
| ENSG00000270231         | 1023.414711           | 993.6375316            | 973.2022338  |                        |       |
| 821.0415208             | 717.5706097           | 779.1584447            | 996.751492   |                        |       |
| 772.5901917             | 0.367216124           | 0.026654248            | 1            | NBPF8                  | 1     |
| 120436353               | 120467739             | +                      | 5330         |                        |       |
| unprocessed_pseudogene  | NBPF member 8         | [Source:HGNC           |              |                        |       |
| Symbol;Acc:HGNC:31990]  | -                     | 1064                   | 1142         | 1046                   | 745   |
| 844                     | 9.651962711           | 9.336787887            | 9.16116091   |                        | 592   |
| 7.766781856             | 6.827187933           | 7.362855134            |              |                        |       |
| ENSG00000105676         | 2146.862438           | 2207.406671            | 2159.466907  |                        |       |
| 2098.339672             | 3041.190303           | 3228.337774            | 2171.245338  |                        |       |
| 2789.28925              | -0.361524131          | 0.026659191            | 0.201749092  | ARMC6                  |       |
| 19                      | 19033575              | 19060311               | +            | 4052                   |       |
| protein_coding          | armadillo repeat      | containing 6           | [Source:HGNC |                        |       |
| Symbol;Acc:HGNC:25049]  | -                     | 2232                   | 2537         | 2321                   | 1904  |
| 3497                    | 26.63336065           | 27.28409973            | 26.73940502  |                        | 2509  |
| 26.11016107             | 38.06085892           | 40.12889617            |              |                        |       |
| ENSG00000131467         | 7066.755525           | 5846.103831            | 6235.565364  |                        |       |
| 6709.397018             | 8487.211839           | 8087.923145            | 6382.80824   |                        |       |
| 7761.510667             | -0.282186175          | 0.026702086            | 0.201749092  | PSME3                  |       |
| 17                      | 42824385              | 42843758               | +            | 5152                   |       |

|                                                   |                                     |                |                  |              |                |      |
|---------------------------------------------------|-------------------------------------|----------------|------------------|--------------|----------------|------|
| protein_coding                                    | proteasome activator subunit 3      | [Source:HGNC   |                  |              |                |      |
| Symbol;Acc:HGNC:9570]                             | -                                   | 7347           | 6719             | 6702         | 6088           | 7002 |
| 8761                                              | 68.95017964                         | 56.83127304    |                  | 60.72599018  |                |      |
| 65.66150504                                       | 83.53983483                         | 79.06947298    |                  |              |                |      |
| ENSG00000256407                                   | 0                                   | 0              | 0                | 19.8372448   | 0              |      |
| 9.231735127                                       | 0                                   | 9.689659975    |                  | -5.840639722 | 0.026722656    |      |
| 1                                                 | AL357673.1                          | 1              |                  | 54132686     | 54200073       |      |
| -                                                 | 3952                                | protein_coding | novel transcript |              |                | -    |
| 0                                                 | 0                                   | 0              | 18               | 0            | 10             | 0    |
| 0                                                 | 0.253085703                         | 0              |                  | 0.117656001  |                |      |
| ENSG00000066136                                   | 922.4198378                         | 1052.803339    |                  | 1352.806929  |                |      |
| 1365.463684                                       | 1580.594721                         | 1422.610383    |                  | 1109.343369  |                |      |
| 1456.222929                                       | -0.392285514                        | 0.026779731    |                  | 1            | NFYC           | 1    |
| 40691648                                          | 40771603                            | +              |                  | 5990         | protein_coding |      |
| nuclear transcription factor Y subunit gamma      | [Source:HGNC                        |                |                  |              |                |      |
| Symbol;Acc:HGNC:7806]                             | NF-YC                               | 959            | 1210             | 1454         | 1239           | 1304 |
| 1541                                              | 7.740927523                         | 8.802725225    |                  | 11.33140129  |                |      |
| 11.49361188                                       | 13.38129451                         | 11.96208363    |                  |              |                |      |
| ENSG00000102466                                   | 299.1371945                         | 196.6393014    |                  | 247.4873749  |                |      |
| 98.08415483                                       | 89.69632621                         | 214.176255     |                  | 247.7546236  |                |      |
| 133.9855787                                       | 0.882089369                         | 0.026795516    |                  | 1            | FGF14          | 13   |
| 101710804                                         | 102402457                           | -              |                  | 13759        | protein_coding |      |
| fibroblast growth factor 14                       | [Source:HGNC Symbol;Acc:HGNC:3671]  |                |                  |              |                |      |
| -                                                 | 311                                 | 226            | 266              | 89           | 74             | 232  |
| 1.092885678                                       | 0.715781                            |                | 0.902486682      |              | 0.359430709    |      |
| 0.330591901                                       | 0.78402901                          |                |                  |              |                |      |
| ENSG00000164031                                   | 1063.81266                          | 1329.490498    |                  | 1129.51005   |                |      |
| 991.8622399                                       | 905.4480497                         | 805.9304766    |                  | 1174.271069  |                |      |
| 901.0802554                                       | 0.38272802                          | 0.026807782    |                  | 1            | DNAJB14        | 4    |
| 99896248                                          | 99946726                            | -              |                  | 13078        | protein_coding |      |
| DnaJ heat shock protein family (Hsp40) member B14 | [Source:HGNC                        |                |                  |              |                |      |
| Symbol;Acc:HGNC:25881]                            | -                                   | 1106           | 1528             | 1214         | 900            | 747  |
| 873                                               | 4.088980227                         | 5.091439868    |                  | 4.333346224  |                |      |
| 3.823958937                                       | 3.510966042                         | 3.103872898    |                  |              |                |      |
| ENSG00000251474                                   | 401.0939232                         | 324.5418558    |                  | 294.0075582  |                |      |
| 187.3517564                                       | 166.0594147                         | 283.4142684    |                  | 339.8811124  |                |      |
| 212.2751465                                       | 0.676135995                         | 0.026887559    |                  | 1            | RPL32P3        | 3    |
| 129382922                                         | 129399655                           | -              |                  | 4504         |                |      |
| transcribed_unprocessed_pseudogene                | ribosomal protein L32               |                |                  |              |                |      |
| pseudogene 3                                      | [Source:HGNC Symbol;Acc:HGNC:27024] |                |                  |              |                |      |
| 373                                               | 316                                 | 170            | 137              | 307          | 4.4765031      | 417  |
| 3.608851799                                       | 3.275176707                         | 2.097309786    |                  | 1.869689743  |                |      |
| 3.169355908                                       |                                     |                |                  |              |                |      |
| ENSG00000066427                                   | 735.8197872                         | 438.5230437    |                  | 463.3410253  |                |      |
| 369.1931671                                       | 373.330655                          | 365.576711     |                  | 545.8946187  |                |      |
| 369.3668444                                       | 0.563214714                         | 0.02692035     |                  | 1            | ATXN3          | 14   |
| 92044496                                          | 92106625                            | -              |                  | 9665         | protein_coding |      |
| ataxin 3                                          | [Source:HGNC Symbol;Acc:HGNC:7106]  |                |                  |              |                |      |
| 504                                               | 498                                 | 335            | 308              | 396          | 3.827020541    | 765  |
| 2.272413056                                       | 2.405323643                         | 1.925994277    |                  | 1.958827617  |                |      |

1.905128815  
ENSG00000166507 25.0082542 4.350427021 3.721614661 0  
0 0.923173513 11.0267653 0.307724504  
4.841664749 0.02693028 1 NDST2 10 73801911  
73811798 - 4654 protein\_coding N-deacetylase  
and N-sulfotransferase 2 [Source:HGNC Symbol;Acc:HGNC:7681] -  
26 5 4 0 0 1 0.270114679  
0.046816854 0.04012173 0 0 0.009990901  
ENSG00000260641 6.732991517 13.05128106 5.582421991 0  
0 0 8.455564857 0 5.422410798  
0.026977029 1 AC114811.2 4 98658904  
98664550 + 5647 antisense "novel transcript,  
antisense TSPAN5" - 7 15 6 0 0  
0 0.059935132 0.11575295 0.049599751 0  
0 0  
ENSG00000101928 727.1630838 777.8563514 786.1910971  
1115.293985 900.5995996 970.2553619 763.7368441  
995.3829823 -0.382231617 0.027052425 1 MOSPD1 X  
134887626 134915267 - 2675 protein\_coding  
motile sperm domain containing 1 [Source:HGNC  
Symbol;Acc:HGNC:25235] - 756 894 845 1012 743  
1051 13.66467244 14.56372032 14.74616056  
21.0217453 17.07310014 18.26879691  
ENSG00000233421 0 0 0 11.02069155 18.18168774  
0 0 9.734126433 -5.842682675 0.027053866  
1 LINC01783 1 16533886 16536172  
- 2068 lincRNA long intergenic non-protein coding RNA  
1783 [Source:HGNC Symbol;Acc:HGNC:52573] - 0 0  
0 10 15 0 0 0 0  
0.268696191 0.445849296 0  
ENSG00000024048 1739.997379 1345.152035 1443.986488  
1283.910566 1123.628303 1127.194859 1509.711967  
1178.244576 0.357498994 0.027056021 1 UBR2 6  
42564062 42693504 + 8840 protein\_coding  
ubiquitin protein ligase E3 component n-recognin 2  
[Source:HGNC Symbol;Acc:HGNC:21289] - 1809 1546 1552  
1165 927 1221 9.894355683 7.621067748  
8.195689335 7.322943848 6.445770364 6.422356616  
ENSG00000239521 211.6083048 120.9418712 106.0660178  
49.59311199 112.726464 29.54155241 146.2053979  
63.95370947 1.198779504 0.02708496 1 CASTOR3 7  
100200653 100272232 - 4874 protein\_coding  
CASTOR family member 3 [Source:HGNC Symbol;Acc:HGNC:29954]  
- 220 139 114 45 93 32  
2.182420199 1.242761736 1.091855993 0.513025595  
1.172856243 0.305277975  
ENSG00000145020 29.81753386 0 2.791210996 0 0  
0 10.86958162 0 5.782783416 0.027088157  
1 AMT 3 49416775 49422753 -  
5746 protein\_coding aminomethyltransferase [Source:HGNC

|                                    |                                               |                                       |                              |                    |             |      |
|------------------------------------|-----------------------------------------------|---------------------------------------|------------------------------|--------------------|-------------|------|
| Symbol;Acc:HGNC:473]               | -                                             | 31                                    | 0                            | 3                  | 0           | 0    |
| 0                                  | 0.260853873                                   | 0                                     | 0.024372589                  | 0                  | 0           | 0    |
| 0                                  |                                               |                                       |                              |                    |             |      |
| ENSG00000173812                    | 11734.64236                                   | 13966.61091                           | 12660.93308                  |                    |             |      |
| 15244.92263                        | 14140.50462                                   | 15966.2859                            | 12787.39545                  |                    |             |      |
| 15117.23771                        | -0.241499967                                  | 0.027157785                           | 0.203449352                  |                    | EIF1        |      |
| 17                                 | 41688885                                      | 41692668                              | +                            | 3623               |             |      |
| protein_coding                     | eukaryotic translation initiation factor 1    |                                       |                              |                    |             |      |
| [Source:HGNC Symbol;Acc:HGNC:3249] | -                                             | 12200                                 | 16052                        | 13608              |             |      |
| 13833                              | 11666                                         | 17295                                 | 162.8143625                  | 193.0720531        |             |      |
| 175.3363665                        | 212.1583292                                   | 197.9251571                           | 221.9643618                  |                    |             |      |
| ENSG00000205177                    | 7.694847448                                   | 0.870085404                           | 18.6080733                   | 0                  |             |      |
| 0                                  | 0                                             | 9.057668719                           | 0                            | 5.520242762        |             |      |
| 0.027199002                        | 1                                             | C11orf91                              | 11                           | 33698261           |             |      |
| 33700801                           | -                                             | 891                                   | protein_coding               | chromosome 11 open |             |      |
| reading frame 91                   | [Source:HGNC Symbol;Acc:HGNC:34444]           | -                                     | 8                            |                    |             |      |
| 1                                  | 20                                            | 0                                     | 0                            | 0                  | 0.434123704 |      |
| 0.048908112                        | 1.047848093                                   | 0                                     | 0                            | 0                  |             |      |
| ENSG00000128805                    | 1279.268388                                   | 1299.907594                           | 1907.327514                  |                    |             |      |
| 1142.845714                        | 1093.32549                                    | 1154.890064                           | 1495.501165                  |                    |             |      |
| 1130.353756                        | 0.403678014                                   | 0.027211646                           | 1                            | ARHGAP22           |             |      |
| 10                                 | 48446034                                      | 48656265                              | -                            | 6783               |             |      |
| protein_coding                     | Rho GTPase activating protein 22 [Source:HGNC |                                       |                              |                    |             |      |
| Symbol;Acc:HGNC:30320]             | -                                             | 1330                                  | 1494                         | 2050               | 1037        | 902  |
| 1251                               | 9.480495587                                   | 9.598146582                           | 14.10841025                  |                    |             |      |
| 8.495109535                        | 8.173951955                                   | 8.575639396                           |                              |                    |             |      |
| ENSG00000274554                    | 24.04639827                                   | 0                                     | 7.443229322                  | 0                  | 0           |      |
| 0                                  | 10.49654253                                   | 0                                     | 5.732499106                  | 0.027225774        |             |      |
| 1                                  | AC083806.2                                    | 12                                    | 116948738                    | 116951422          |             |      |
| -                                  | 2685                                          | antisense                             | "novel transcript, antisense |                    |             |      |
| to FBXW8"                          | -                                             | 25                                    | 0                            | 8                  | 0           | 0    |
| 0.450191131                        | 0                                             | 0.139088663                           | 0                            | 0                  | 0           |      |
| ENSG00000183396                    | 24.04639827                                   | 0                                     | 7.443229322                  | 0                  | 0           |      |
| 0                                  | 10.49654253                                   | 0                                     | 5.732499106                  | 0.027225774        |             |      |
| 1                                  | TMEM89                                        | 3                                     | 48620759                     | 48621855           | -           |      |
| 662                                | protein_coding                                | transmembrane protein 89 [Source:HGNC |                              |                    |             |      |
| Symbol;Acc:HGNC:32372]             | -                                             | 25                                    | 0                            | 8                  | 0           | 0    |
| 0                                  | 1.825926265                                   | 0                                     | 0.56412849                   | 0                  | 0           |      |
| 0                                  |                                               |                                       |                              |                    |             |      |
| ENSG00000174547                    | 942.6188123                                   | 926.6409555                           | 932.2644725                  |                    |             |      |
| 1041.455352                        | 1317.566305                                   | 1242.591548                           | 933.8414135                  |                    |             |      |
| 1200.537735                        | -0.362361492                                  | 0.027227582                           | 1                            | MRPL11             | 11          |      |
| 66435075                           | 66466738                                      | -                                     | 2539                         | protein_coding     |             |      |
| mitochondrial ribosomal            | protein L11 [Source:HGNC                      |                                       |                              |                    |             |      |
| Symbol;Acc:HGNC:14042]             | -                                             | 980                                   | 1065                         | 1002               | 945         | 1087 |
| 1346                               | 18.66227528                                   | 18.2787084                            | 18.42260568                  |                    |             |      |
| 20.68145795                        | 26.31565617                                   | 24.64979871                           |                              |                    |             |      |
| ENSG00000066322                    | 1815.983998                                   | 2210.016927                           | 2181.796595                  |                    |             |      |
| 2510.513536                        | 2547.860509                                   | 2563.652845                           | 2069.26584                   |                    |             |      |
| 2540.67563                         | -0.295969936                                  | 0.027238126                           | 1                            | ELOVL1             | 1           |      |

|                                                                 |              |              |             |                      |
|-----------------------------------------------------------------|--------------|--------------|-------------|----------------------|
| 43363397                                                        | 43368074     | -            | 2507        | protein_coding       |
| ELOVL fatty acid elongase 1 [Source:HGNC                        |              |              |             |                      |
| Symbol;Acc:HGNC:14418]                                          | -            | 1888         | 2540        | 2345 2278 2102       |
| 2777                                                            | 36.41236374  | 44.15073932  | 43.66510903 |                      |
| 50.49070438                                                     | 51.53778364  | 51.50537623  |             |                      |
| ENSG00000070018                                                 | 957.0466513  | 802.2187427  | 747.1141431 |                      |
| 682.1808072                                                     | 579.3897828  | 610.2176919  | 835.4598457 |                      |
| 623.9294273                                                     | 0.420921547  | 0.02730622   | 1           | LRP6 12              |
| 12116025                                                        | 12267012     | -            | 10337       | protein_coding       |
| LDL receptor related protein 6 [Source:HGNC                     |              |              |             |                      |
| Symbol;Acc:HGNC:6698]                                           | -            | 995          | 922         | 803 619 478          |
| 661                                                             | 4.654036457  | 3.886825135  | 3.626327846 |                      |
| 3.327424242                                                     | 2.84237085   | 2.973294732  |             |                      |
| ENSG00000101132                                                 | 686.7651347  | 801.3486573  | 549.8685661 |                      |
| 748.3049565                                                     | 1021.810851  | 1044.109243  | 679.3274527 |                      |
| 938.0750169                                                     | -0.465534075 | 0.027310382  | 1           | PFDN4 20             |
| 54207847                                                        | 54228052     | +            | 1975        | protein_coding       |
| prefoldin subunit 4 [Source:HGNC Symbol;Acc:HGNC:8868]          |              |              |             |                      |
| 714                                                             | 921          | 591          | 679         | 843 1131 17.47963374 |
| 20.32128319                                                     | 13.96903536  | 19.10357809  | 26.23661696 |                      |
| 26.62726271                                                     |              |              |             |                      |
| ENSG00000105193                                                 | 23293.26508  | 25828.48522  | 29949.69398 |                      |
| 28647.18563                                                     | 33540.36544  | 32632.33733  | 26357.1481  |                      |
| 31606.62946                                                     | -0.262027246 | 0.027313076  | 0.203449352 | RPS16                |
| 19                                                              | 39433207     | 39435948     | -           | 2603                 |
| protein_coding ribosomal protein S16 [Source:HGNC               |              |              |             |                      |
| Symbol;Acc:HGNC:10396]                                          | -            | 24217        | 29685       | 32190 25994 27671    |
| 35348                                                           | 449.8289375  | 496.9600559  | 577.288418  |                      |
| 554.8952282                                                     | 653.4284604  | 631.4248887  |             |                      |
| ENSG0000010322                                                  | 2488.321293  | 1645.331499  | 1860.80733  |                      |
| 1503.222328                                                     | 1478.77727   | 1637.709812  | 1998.153374 |                      |
| 1539.903136                                                     | 0.375379708  | 0.027324547  | 1           | NISCH 3              |
| 52455118                                                        | 52493071     | +            | 9161        | protein_coding       |
| nischarin [Source:HGNC Symbol;Acc:HGNC:18006]                   |              |              |             |                      |
| 1891                                                            | 2000         | 1364         | 1220        | 1774 13.65383851     |
| 8.995125841                                                     | 10.19138359  | 8.273390643  | 8.185859905 |                      |
| 9.004129872                                                     |              |              |             |                      |
| ENSG00000168268                                                 | 4608.251765  | 4101.582596  | 4619.454198 |                      |
| 6838.339109                                                     | 5939.35133   | 4215.210259  | 4443.096186 |                      |
| 5664.300233                                                     | -0.350127543 | 0.027330071  | 0.203449352 | NT5DC2               |
| 3                                                               | 52524385     | 52535054     | -           | 4719                 |
| protein_coding 5'-nucleotidase domain containing 2 [Source:HGNC |              |              |             |                      |
| Symbol;Acc:HGNC:25717]                                          | -            | 4791         | 4714        | 4965 6205 4900       |
| 4566                                                            | 49.08823421  | 43.53095536  | 49.11513152 |                      |
| 73.06406856                                                     | 63.8253879   | 44.99009891  |             |                      |
| ENSG00000147804                                                 | 0            | 0            | 0           | 36.36828213 0 0      |
| 0                                                               | 12.12276071  | -6.162006419 | 0.027370141 | 1                    |
| SLC39A4                                                         | 8            | 144409742    | 144416895   | - 5033               |
| protein_coding solute carrier family 39 member 4 [Source:HGNC   |              |              |             |                      |
| Symbol;Acc:HGNC:17129]                                          | -            | 0            | 0           | 0 33 0               |



|                             |                                                 |             |             |                |       |       |
|-----------------------------|-------------------------------------------------|-------------|-------------|----------------|-------|-------|
| 0                           | 0                                               | 0           | 0           | 0.364333456    | 0     | 0     |
| ENSG0000079246              | 9844.595453                                     | 9181.141186 | 8978.395369 |                |       |       |
| 12927.27119                 | 11442.34215                                     | 9543.767775 | 9334.710669 |                |       |       |
| 11304.46037                 | -0.276117254                                    | 0.02741973  | 0.203449352 |                |       | XRCC5 |
| 2                           | 216107464                                       | 216206303   | + 5463      |                |       |       |
| protein_coding              | X-ray repair cross complementing 5 [Source:HGNC |             |             |                |       |       |
| Symbol;Acc:HGNC:12833]      | -                                               | 10235       | 10552       | 9650           | 11730 | 9440  |
| 10338                       | 90.58532837                                     | 84.17094048 | 82.45977561 |                |       |       |
| 119.3105521                 | 106.2155626                                     | 87.99061344 |             |                |       |       |
| ENSG0000081307              | 1383.148829                                     | 1207.678541 | 1149.048527 |                |       |       |
| 937.8608513                 | 1033.931976                                     | 956.4077592 | 1246.625299 |                |       |       |
| 976.0668623                 | 0.35313024                                      | 0.027431399 | 1           | UBA5           | 3     |       |
| 132654446                   | 132678097                                       | +           | 6827        | protein_coding |       |       |
| ubiquitin like modifier     | activating enzyme 5 [Source:HGNC                |             |             |                |       |       |
| Symbol;Acc:HGNC:23230]      | -                                               | 1438        | 1388        | 1235           | 851   | 853   |
| 1036                        | 10.18427692                                     | 8.85968255  | 8.444677927 |                |       |       |
| 6.926465907                 | 7.680093168                                     | 7.056037345 |             |                |       |       |
| ENSG00000266412             | 3073.129699                                     | 3401.163845 | 3461.101635 |                |       |       |
| 4065.533114                 | 4358.756609                                     | 3608.685261 | 3311.798393 |                |       |       |
| 4010.991661                 | -0.276002115                                    | 0.027500028 | 0.203449352 |                |       | NCOA4 |
| 10                          | 46005088                                        | 46030714    | - 4079      |                |       |       |
| protein_coding              | nuclear receptor coactivator 4 [Source:HGNC     |             |             |                |       |       |
| Symbol;Acc:HGNC:7671]       | -                                               | 3195        | 3909        | 3720           | 3689  | 3596  |
| 3909                        | 37.87201161                                     | 41.76096858 | 42.57309956 |                |       |       |
| 50.25357859                 | 54.18927467                                     | 44.55977438 |             |                |       |       |
| ENSG00000226555             | 0                                               | 39.15384319 | 0           | 0              | 0     | 0     |
| 13.05128106                 | 0                                               | 6.049207729 | 0.027516533 |                |       | 1     |
| AGKP1                       | Y                                               | 14639096    | 14640358    | +              |       | 1263  |
| processed_pseudogene        | acylglycerol kinase pseudogene 1                |             |             |                |       |       |
| [Source:HGNC                | Symbol;Acc:HGNC:37661]                          | -           | 0           | 45             | 0     | 0     |
| 0                           | 0                                               | 0           | 0           | 1.552629241    | 0     | 0     |
| 0                           | 0                                               |             |             |                |       |       |
| ENSG00000168010             | 202.9516014                                     | 214.0410094 | 248.4177786 |                |       |       |
| 96.98208568                 | 145.453502                                      | 151.4004561 | 221.8034632 |                |       |       |
| 131.2786812                 | 0.755988071                                     | 0.027572073 | 1           | ATG16L2        | 11    |       |
| 72814308                    | 72843674                                        | +           | 8617        | protein_coding |       |       |
| autophagy related 16 like 2 | [Source:HGNC                                    |             |             |                |       |       |
| Symbol;Acc:HGNC:25464]      | -                                               | 211         | 246         | 267            | 88    | 120   |
| 164                         | 1.183934235                                     | 1.244049359 | 1.446442601 |                |       |       |
| 0.567464402                 | 0.855997534                                     | 0.884950081 |             |                |       |       |
| ENSG00000165637             | 2132.434599                                     | 2284.844272 | 2111.085916 |                |       |       |
| 2811.378415                 | 2916.342714                                     | 2323.627732 | 2176.121596 |                |       |       |
| 2683.782954                 | -0.302004489                                    | 0.027591987 | 0.203449352 |                |       | VDAC2 |
| 10                          | 75210154                                        | 75231448    | + 2827      |                |       |       |
| protein_coding              | voltage dependent anion channel 2 [Source:HGNC  |             |             |                |       |       |
| Symbol;Acc:HGNC:12672]      | -                                               | 2217        | 2626        | 2269           | 2551  | 2406  |
| 2517                        | 37.91762273                                     | 40.47878897 | 37.46750063 |                |       |       |
| 50.14142748                 | 52.31390926                                     | 41.39886411 |             |                |       |       |
| ENSG00000123144             | 3875.317546                                     | 3471.640763 | 4431.512657 |                |       |       |
| 4032.47104                  | 4975.721879                                     | 5806.761395 | 3926.156989 |                |       |       |

|                                                          |                                              |                                   |                              |                |
|----------------------------------------------------------|----------------------------------------------|-----------------------------------|------------------------------|----------------|
| 4938.318105                                              | -0.331134727                                 | 0.027703579                       | 0.203455086                  | TRIR           |
| 19                                                       | 12730640                                     | 12734775                          | - 1402                       |                |
| protein_coding                                           | telomerase RNA component interacting RNase   |                                   |                              |                |
| [Source:HGNC Symbol;Acc:HGNC:28424]                      | -                                            | 4029                              | 3990                         | 4763           |
| 3659                                                     | 4105 6290                                    | 138.9474146                       | 124.0176449                  |                |
| 158.5910242                                              | 145.019512                                   | 179.975135                        | 208.6092924                  |                |
| ENSG00000242125                                          | 1079.202355                                  | 850.0734399                       | 917.3780139                  |                |
| 763.7339247                                              | 728.4796223                                  | 670.2239702                       | 948.8846028                  |                |
| 720.8125057                                              | 0.396765568                                  | 0.02775885                        | 1 SNHG3                      | 1              |
| 28505980                                                 | 28510892                                     | +                                 | 4088                         |                |
| processed_transcript                                     | small nucleolar RNA host gene 3 [Source:HGNC |                                   |                              |                |
| Symbol;Acc:HGNC:10118]                                   | -                                            | 1122 977                          | 986 693                      | 601            |
| 726                                                      | 13.27037472                                  | 10.41459233                       | 11.25931744                  |                |
| 9.419641863                                              | 9.036722478                                  | 8.25765533                        |                              |                |
| ENSG00000231663                                          | 0 12.18119566                                | 18.6080733                        | 0 0                          |                |
| 0                                                        | 10.26308965                                  | 0                                 | 5.701751151                  | 0.02783987     |
| 1                                                        | AL355472.1                                   | 1                                 | 234372807                    | 234373593      |
| -                                                        | 575 antisense                                |                                   | uncharacterized LOC101927765 |                |
| [Source:NCBI gene;Acc:101927765]                         |                                              | -                                 | 0 14                         | 20             |
| 0                                                        | 0 0                                          | 0                                 | 1.061008318                  | 1.623708958    |
| 0                                                        | 0 0                                          |                                   |                              |                |
| ENSG00000104804                                          | 9.618559309                                  | 0                                 | 21.3992843                   | 0 0            |
| 0                                                        | 10.3392812                                   | 0                                 | 5.711214759                  | 0.027952851    |
| 1                                                        | TULP2 19                                     | 48880965                          | 48898733                     | -              |
| 2240                                                     | protein_coding                               | tubby like protein 2 [Source:HGNC |                              |                |
| Symbol;Acc:HGNC:12424]                                   | Tub                                          | 10 0                              | 23 0                         | 0 0            |
| 0                                                        | 0.215850569                                  | 0                                 | 0.479320334                  | 0 0            |
| 0                                                        |                                              |                                   |                              |                |
| ENSG00000153922                                          | 2007.393328                                  | 1792.375933                       | 1470.968195                  |                |
| 1531.876126                                              | 1237.566879                                  | 1327.523511                       | 1756.912485                  |                |
| 1365.655505                                              | 0.363309947                                  | 0.028002348                       | 1 CHD1                       | 5              |
| 98853985                                                 | 98928957                                     | -                                 | 10437                        | protein_coding |
| chromodomain helicase DNA binding protein 1 [Source:HGNC |                                              |                                   |                              |                |
| Symbol;Acc:HGNC:1915]                                    | -                                            | 2087 2060                         | 1581 1390                    | 1021           |
| 1438                                                     | 9.668252455                                  | 8.601023508                       | 7.071348191                  |                |
| 7.40033126                                               | 6.01308605                                   | 6.406402497                       |                              |                |
| ENSG00000170677                                          | 472.2712621                                  | 495.078595                        | 431.7073006                  |                |
| 536.7076787                                              | 690.9041343                                  | 698.8423491                       | 466.3523859                  |                |
| 642.1513874                                              | -0.461565629                                 | 0.028016675                       | 1 SOCS6                      | 18             |
| 70288901                                                 | 70330200                                     | +                                 | 5984                         | protein_coding |
| suppressor of cytokine signaling 6 [Source:HGNC          |                                              |                                   |                              |                |
| Symbol;Acc:HGNC:16833]                                   | -                                            | 491 569                           | 464 487                      | 570            |
| 757                                                      | 3.967264204                                  | 4.143613881                       | 3.619698781                  |                |
| 4.522196401                                              | 5.855050308                                  | 5.882139403                       |                              |                |
| ENSG00000129654                                          | 0 0                                          | 0 0                               | 8.484787614                  |                |
| 20.30981728                                              | 0 9.598201631                                | -5.828302574                      | 0.028019472                  |                |
| 1                                                        | FOXJ1 17                                     | 76136333                          | 76141299                     | -              |
| 2641                                                     | protein_coding                               | forkhead box J1 [Source:HGNC      |                              |                |
| Symbol;Acc:HGNC:3816]                                    | Fork                                         | 0 0                               | 0 0                          | 7              |
| 22                                                       | 0 0                                          | 0 0                               | 0.162920974                  |                |

|                                                                   |                                                     |                |                           |                |                |      |   |
|-------------------------------------------------------------------|-----------------------------------------------------|----------------|---------------------------|----------------|----------------|------|---|
| 0.387333712                                                       |                                                     |                |                           |                |                |      |   |
| ENSG00000196993                                                   | 3.847423724                                         | 18.27179349    | 3.721614661               | 0              |                |      |   |
| 0                                                                 | 0                                                   | 8.613610625    | 0                         | 5.44982674     |                |      |   |
| 0.028088991                                                       | 1                                                   | NPIPB9         | 16                        | 28751787       | 28772807       |      |   |
| +                                                                 | 2123                                                | protein_coding | nuclear pore complex      |                |                |      |   |
| interacting protein family member B9 [Source:HGNC                 |                                                     |                |                           |                |                |      |   |
| Symbol;Acc:HGNC:41987]                                            | -                                                   | 4              | 21                        | 4              | 0              | 0    |   |
| 0                                                                 | 0.091098497                                         | 0.431050247    | 0.087954089               | 0              |                |      |   |
| 0                                                                 | 0                                                   |                |                           |                |                |      |   |
| ENSG00000128886                                                   | 10.58041524                                         | 7.830768638    | 6.512825656               | 0              |                |      |   |
| 0                                                                 | 0                                                   | 8.308003178    | 0                         | 5.396148083    |                |      |   |
| 0.028093117                                                       | 1                                                   | ELL3           | 15                        | 43772600       | 43777543       |      |   |
| -                                                                 | 2880                                                | protein_coding | elongation factor for RNA |                |                |      |   |
| polymerase II 3 [Source:HGNC Symbol;Acc:HGNC:23113]               | -                                                   |                |                           |                |                | 11   |   |
| 9                                                                 | 7                                                   | 0              | 0                         | 0              | 0.184672154    |      |   |
| 0.136178523                                                       | 0.113462301                                         | 0              | 0                         | 0              |                |      |   |
| ENSG00000131473                                                   | 7206.224635                                         | 6189.787566    | 7205.045983               |                |                |      |   |
| 9325.709193                                                       | 8930.84502                                          | 6959.805112    | 6867.019395               |                |                |      |   |
| 8405.453109                                                       | -0.291513331                                        | 0.028144356    | 0.205868677               | ACLY           |                |      |   |
| 17                                                                | 41866908                                            | 41930542       | -                         | 5217           |                |      |   |
| protein_coding                                                    | ATP citrate lyase [Source:HGNC Symbol;Acc:HGNC:115] |                |                           |                |                |      |   |
| -                                                                 | 7492                                                | 7114           | 7744                      | 8462           | 7368           | 7539 |   |
| 69.43495342                                                       | 59.42259613                                         | 69.29318814    | 90.12893264               |                |                |      |   |
| 86.81127618                                                       | 67.19298345                                         |                |                           |                |                |      |   |
| ENSG00000132837                                                   | 0                                                   | 2.610256213    | 9.304036652               | 23.14345226    |                |      |   |
|                                                                   | 12.12112516                                         | 48.00502266    | 3.971430955               | 27.75653336    |                |      |   |
|                                                                   | -2.807192795                                        | 0.028157783    | 1                         | DMGDH          | 5              |      |   |
| 78997606                                                          | 79236038                                            | -              | 5254                      | protein_coding |                |      |   |
| dimethylglycine dehydrogenase [Source:HGNC Symbol;Acc:HGNC:24475] |                                                     |                |                           |                |                |      |   |
| -                                                                 | 0                                                   | 3              | 10                        | 21             | 10             | 52   | 0 |
| 0.024882258                                                       | 0.0888497                                           | 0.222096273    | 0.116992303               |                |                |      |   |
| 0.460197541                                                       |                                                     |                |                           |                |                |      |   |
| ENSG00000117054                                                   | 1001.292024                                         | 982.3264214    | 1221.620012               |                |                |      |   |
| 909.2070532                                                       | 778.1762355                                         | 758.8486275    | 1068.412819               |                |                |      |   |
| 815.4106387                                                       | 0.390005284                                         | 0.028176645    | 1                         | ACADM          | 1              |      |   |
|                                                                   | 75724347                                            | 75787575       | +                         | 4783           | protein_coding |      |   |
| acyl-CoA dehydrogenase medium chain [Source:HGNC                  |                                                     |                |                           |                |                |      |   |
| Symbol;Acc:HGNC:89]                                               | -                                                   | 1041           | 1129                      | 1313           | 825            | 642  |   |
|                                                                   | 822                                                 | 10.52329064    | 10.28613355               | 12.81475717    |                |      |   |
| 9.584415025                                                       | 8.250533032                                         | 7.991024364    |                           |                |                |      |   |
| ENSG00000197299                                                   | 252.9681098                                         | 271.4666461    | 311.6852278               |                |                |      |   |
| 386.8262736                                                       | 399.9971304                                         | 422.8134688    | 278.7066613               |                |                |      |   |
| 403.2122909                                                       | -0.53301122                                         | 0.02824843     | 1                         | BLM            | 15             |      |   |
|                                                                   | 90717327                                            | 90816165       | +                         | 6674           | protein_coding |      |   |
| Bloom syndrome RecQ like helicase [Source:HGNC                    |                                                     |                |                           |                |                |      |   |
| Symbol;Acc:HGNC:1058]                                             | -                                                   | 263            | 312                       | 335            | 351            | 330  |   |
|                                                                   | 458                                                 | 1.905332444    | 2.037168675               | 2.343174544    |                |      |   |
| 2.922354906                                                       | 3.039310691                                         | 3.190878691    |                           |                |                |      |   |
| ENSG00000185347                                                   | 243.3495505                                         | 353.2546741    | 425.194475                |                |                |      |   |
| 414.3780024                                                       | 561.208095                                          | 559.4431487    | 340.5995665               |                |                |      |   |

|                                                         |                                 |               |                               |                  |         |
|---------------------------------------------------------|---------------------------------|---------------|-------------------------------|------------------|---------|
| 511.6764154                                             | -0.58696422                     | 0.028249531   | 1                             | TEDC1            | 14      |
| 105489855                                               | 105499575                       | +             | 6698                          | protein_coding   |         |
| tubulin epsilon and delta complex 1 [Source:HGNC        |                                 |               |                               |                  |         |
| Symbol;Acc:HGNC:20127]                                  | -                               | 253           | 406                           | 457              | 376 463 |
| 606                                                     | 1.82631882                      | 2.641432324   | 3.185056148                   |                  |         |
| 3.119282763                                             | 4.248965531                     | 4.206864259   |                               |                  |         |
| ENSG00000224738                                         | 25.97011014                     | 17.40170808   | 24.19049529                   |                  |         |
| 62.81794186                                             | 103.0295639                     | 29.54155241   | 22.52077117                   |                  |         |
| 65.12968605                                             | -1.529606298                    | 0.028250779   | 1                             | AC099850.1       |         |
| 17                                                      | 59106598                        | 59118267      | +                             | 1338             |         |
| antisense                                               | novel transcript                | -             | 27                            | 20               | 26      |
| 57                                                      | 85                              | 32            | 0.97568329                    | 0.65137709       |         |
| 0.907116926                                             | 2.367177291                     | 3.904902301   | 1.112051456                   |                  |         |
| ENSG00000230536                                         | 21.16083048                     | 1.740170808   | 3.721614661                   |                  | 0       |
| 0                                                       | 0                               | 8.874205317   | 0                             | 5.490067554      |         |
| 0.028318725                                             | 1                               | AL360268.1    | 9                             | 128090969        |         |
| 128094457                                               | -                               | 765           | antisense                     | novel transcript |         |
| -                                                       | 22                              | 2             | 4                             | 0                | 0       |
| 1.390472686                                             | 0.11392713                      | 0.244086968   | 0                             | 0                | 0       |
| ENSG00000104852                                         | 4765.996138                     | 3636.086904   | 5720.121734                   |                  |         |
| 3495.763361                                             | 3631.489099                     | 4008.419392   | 4707.401592                   |                  |         |
| 3711.890617                                             | 0.342571772                     | 0.028362776   | 0.206643082                   |                  |         |
| SNRNP70 19                                              | 49085419                        | 49108605      | +                             | 4684             |         |
| protein_coding                                          | small nuclear ribonucleoprotein | U1 subunit 70 |                               |                  |         |
| [Source:HGNC Symbol;Acc:HGNC:11150]                     | -                               |               | 4955                          | 4179             | 6148    |
| 3172                                                    | 2996                            | 4342          | 51.14792138                   | 38.87891016      |         |
| 61.27213428                                             | 37.62949031                     | 39.31626764   | 43.10264791                   |                  |         |
| ENSG00000257097                                         | 9.618559309                     | 8.700854042   | 6.512825656                   |                  | 0       |
| 0                                                       | 0                               | 8.277413003   | 0                             | 5.390997138      |         |
| 0.028364778                                             | 1                               | CLIP1-AS1     | 12                            | 122395542        |         |
| 122400857                                               | +                               | 1809          | lincRNA CLIP1 antisense RNA 1 |                  |         |
| [Source:HGNC Symbol;Acc:HGNC:48586]                     | -                               |               | 10                            | 10               | 7       |
| 0                                                       | 0                               | 0             | 0.267277653                   | 0.240890698      |         |
| 0.1806365                                               | 0                               | 0             | 0                             |                  |         |
| ENSG00000087111                                         | 761.7898973                     | 838.7623297   | 832.7112803                   |                  |         |
| 1031.536729                                             | 1013.326064                     | 1066.265407   | 811.0878358                   |                  |         |
| 1037.042733                                             | -0.354607562                    | 0.028381285   | 1                             | PIGS             | 17      |
| 28553383                                                | 28571872                        | -             | 5990                          | protein_coding   |         |
| phosphatidylinositol glycan anchor biosynthesis class S |                                 |               |                               |                  |         |
| [Source:HGNC Symbol;Acc:HGNC:14937]                     | -                               |               | 792                           | 964              | 895     |
| 936                                                     | 836                             | 1155          | 6.392924503                   | 7.013080262      |         |
| 6.97496847                                              | 8.682825439                     | 8.578805376   | 8.965740815                   |                  |         |
| ENSG00000172172                                         | 532.8681857                     | 666.4854197   | 798.2863447                   |                  |         |
| 853.0015263                                             | 1006.053389                     | 857.6281933   | 665.8799834                   |                  |         |
| 905.5610361                                             | -0.443003217                    | 0.028385033   | 1                             | MRPL13           | 8       |
| 120380761                                               | 120445402                       | -             | 4209                          | protein_coding   |         |
| mitochondrial ribosomal protein L13 [Source:HGNC        |                                 |               |                               |                  |         |
| Symbol;Acc:HGNC:14278]                                  | -                               | 554           | 766                           | 858              | 774 830 |
| 929                                                     | 6.364027615                     | 7.930643752   | 9.515999224                   |                  |         |
| 10.21819246                                             | 12.12122539                     | 10.26284586   |                               |                  |         |

|                                                        |              |             |                      |                |             |             |
|--------------------------------------------------------|--------------|-------------|----------------------|----------------|-------------|-------------|
| ENSG00000147813                                        | 199.1041777  | 170.5367392 | 218.6448613          |                |             |             |
| 91.4717399                                             | 140.6050519  | 108.9344745 | 196.0952594          |                |             |             |
| 113.6704221                                            | 0.787944308  | 0.028466716 | 1                    | NAPRT          | 8           |             |
| 143574785                                              | 143578649    | -           | 3079                 | protein_coding |             |             |
| nicotinate phosphoribosyltransferase [Source:HGNC      |              |             |                      |                |             |             |
| Symbol;Acc:HGNC:30450]                                 | -            | 207         | 196                  | 235            | 83          | 116         |
| 118                                                    | 3.25058759   | 2.773990569 | 3.562904726          |                |             |             |
| 1.497891813                                            | 2.315771264  | 1.781982097 |                      |                |             |             |
| ENSG00000172336                                        | 744.4764906  | 626.4614911 | 691.2899232          |                |             |             |
| 829.858074                                             | 870.2967867  | 1019.183558 | 687.4093016          |                |             |             |
| 906.4461396                                            | -0.399875861 | 0.028466858 | 1                    | POP7           | 7           |             |
| 100706053                                              | 100707495    | +           | 988                  | protein_coding |             |             |
| "POP7 homolog, ribonuclease P/MRP subunit [Source:HGNC |              |             |                      |                |             |             |
| Symbol;Acc:HGNC:19949]"                                | -            | 774         | 720                  | 743            | 753         | 718         |
| 1104                                                   | 37.87784239  | 31.75661103 | 35.10572165          |                |             |             |
| 42.34967436                                            | 44.66988762  | 51.95688994 |                      |                |             |             |
| ENSG00000091483                                        | 1766.929345  | 1943.770793 | 1774.27979           |                |             |             |
| 2216.261072                                            | 2310.286456  | 2151.917458 | 1828.326643          |                |             |             |
| 2226.154995                                            | -0.283743847 | 0.028632648 | 1                    | FH             | 1           |             |
| 241497603                                              | 241519761    | -           | 2142                 | protein_coding |             |             |
| fumarate hydratase [Source:HGNC Symbol;Acc:HGNC:3700]  |              |             |                      |                |             |             |
| 1837                                                   | 2234         | 1907        | 2011                 | 1906           | 2331        | 41.46588189 |
| 45.44878735                                            | 41.56016493  | 52.16805532 | 54.69539839          |                |             |             |
| 50.60038546                                            |              |             |                      |                |             |             |
| ENSG00000270157                                        | 87.52888972  | 13.92136647 | 26.05130263          |                |             |             |
| 13.22482987                                            | 9.69690013   | 0           | 42.5005196           | 7.640576665    |             |             |
| 2.488338739                                            | 0.028641727  | 1           | AC004918.3           | 7              |             |             |
| 141662922                                              | 141663846    | -           | 925                  | sense_intronic |             |             |
| novel transcript                                       |              |             |                      |                |             |             |
| 8                                                      | 0            | 4.756646488 | 0.753766527          | 1.413065634    |             |             |
| 0.720861045                                            | 0.531613027  | 0           |                      |                |             |             |
| ENSG00000236942                                        | 16.35155083  | 4.350427021 | 4.652018326          | 0              |             |             |
| 0                                                      | 0            | 8.451332058 | 0                    | 5.420069445    |             |             |
| 0.028749424                                            | 1            | AC096533.1  | 1                    | 205625483      |             |             |
| 205626153                                              | +            | 353         | processed_pseudogene | GABA(A)        |             |             |
| receptor-associated protein (GABARAP) pseudogene       |              |             |                      |                |             |             |
| 5                                                      | 5            | 0           | 0                    | 0              | 2.328495658 |             |
| 0.617239764                                            | 0.661212926  | 0           | 0                    | 0              |             |             |
| ENSG00000269693                                        | 16.35155083  | 23.49230591 | 20.46888063          | 0              |             |             |
| 0                                                      | 5.539041076  | 20.10424579 | 1.846347025          |                |             |             |
| 3.386278985                                            | 0.028754994  | 1           | AC010422.6           | 19             |             |             |
| 12525720                                               | 12580975     | -           | 5857                 | protein_coding | novel       |             |
| transcript                                             |              |             |                      |                |             |             |
| 0.140337881                                            | 0.200884828  | 0.175345043 | 0                    | 0              | 6           |             |
| 0.047632902                                            |              |             |                      |                | 0           |             |
| ENSG00000175104                                        | 211.6083048  | 356.7350157 | 328.4324938          |                |             |             |
| 415.4800716                                            | 476.3602189  | 451.4318477 | 298.9252715          |                |             |             |
| 447.7573794                                            | -0.582164271 | 0.028789328 | 1                    | TRAF6          | 11          |             |
| 36487027                                               | 36510272     | -           | 4871                 | protein_coding |             |             |
| TNF receptor associated factor 6 [Source:HGNC          |              |             |                      |                |             |             |

|                                                      |                                          |                                    |             |                |                |       |
|------------------------------------------------------|------------------------------------------|------------------------------------|-------------|----------------|----------------|-------|
| Symbol;Acc:HGNC:12036]                               | -                                        | 220                                | 410         | 353            | 377            | 393   |
| 489                                                  | 2.183764329                              | 3.667957753                        | 3.383004782 |                |                |       |
| 4.300661532                                          | 4.959315991                              | 4.667902193                        |             |                |                |       |
| ENSG00000136802                                      | 2565.269768                              | 2526.728014                        | 2565.122905 |                |                |       |
| 3121.059848                                          | 2899.373139                              | 3135.097249                        | 2552.373562 |                |                |       |
| 3051.843412                                          | -0.258018739                             | 0.028790896                        | 0.208480881 |                |                | LRR8A |
| 9                                                    | 128882112                                | 128918039                          | +           | 5230           |                |       |
| protein_coding                                       | leucine rich repeat containing 8         | VRAC subunit A                     |             |                |                |       |
| [Source:HGNC Symbol;Acc:HGNC:19027]                  | -                                        | 2667                               | 2904        | 2757           |                |       |
| 2832                                                 | 2392                                     | 3396                               | 24.65599557 | 24.19655408    |                |       |
| 24.60827169                                          | 30.08871244                              | 28.11297761                        | 30.1923565  |                |                |       |
| ENSG00000124257                                      | 4.809279655                              | 0                                  | 0           | 37.47035128    |                |       |
| 10.90901265                                          | 9.231735127                              | 1.603093218                        |             |                |                |       |
| 19.20369969                                          | -3.598700427                             | 0.028899359                        | 1           | NEURL2         | 20             |       |
| 45888625                                             | 45891287                                 | -                                  | 1301        | protein_coding |                |       |
|                                                      | neuralized E3 ubiquitin protein ligase 2 | [Source:HGNC                       |             |                |                |       |
| Symbol;Acc:HGNC:16156]                               | -                                        | 5                                  | 0           | 0              | 34             | 9     |
| 10                                                   | 0.185820628                              | 0                                  | 0           | 1.452157306    |                |       |
| 0.425218913                                          | 0.35739932                               |                                    |             |                |                |       |
| ENSG00000052749                                      | 6556.010025                              | 5036.05432                         | 6042.041402 |                |                |       |
| 5756.107199                                          | 7832.67108                               | 8694.448143                        | 5878.035249 |                |                |       |
| 7427.742141                                          | -0.337740415                             | 0.02891694                         | 0.208480881 |                |                | RRP12 |
| 10                                                   | 97356358                                 | 97426076                           | -           | 8529           |                |       |
| protein_coding                                       | ribosomal RNA processing 12 homolog      | [Source:HGNC                       |             |                |                |       |
| Symbol;Acc:HGNC:29100]                               | -                                        | 6816                               | 5788        | 6494           | 5223           | 6462  |
| 9418                                                 | 38.63960551                              | 29.57256573                        | 35.54350121 |                |                |       |
| 34.02780654                                          | 46.5710682                               | 51.34422345                        |             |                |                |       |
| ENSG00000019582                                      | 0                                        | 0                                  | 0.930403665 | 6.612414933    |                |       |
| 14.5453502                                           | 7.385388102                              | 0.310134555                        |             |                |                |       |
| 9.51438441                                           | -4.849393201                             | 0.028956694                        | 1           | CD74           | 5              |       |
| 150401637                                            | 150412929                                | -                                  | 3184        | protein_coding |                |       |
|                                                      | CD74 molecule                            | [Source:HGNC Symbol;Acc:HGNC:1697] |             |                |                |       |
| 0                                                    | 0                                        | 1                                  | 6           | 12             | 8              | 0     |
| 0.014661317                                          | 0.1047105                                | 0.231662398                        | 0.11682827  |                |                |       |
| ENSG00000106263                                      | 17365.34698                              | 15150.79714                        | 16564.90686 |                |                |       |
| 16323.84833                                          | 20778.03275                              | 22427.57732                        | 16360.35033 |                |                |       |
| 19843.1528                                           | -0.27849127                              | 0.028961817                        | 0.208480881 |                |                | EIF3B |
| 7                                                    | 2354086                                  | 2380745                            | +           | 8998           | protein_coding |       |
| eukaryotic translation initiation factor 3 subunit B | [Source:HGNC                             |                                    |             |                |                |       |
| Symbol;Acc:HGNC:3280]                                | -                                        | 18054                              | 17413       | 17804          | 14812          | 17142 |
| 24294                                                | 97.01271653                              | 84.3307978                         | 92.36716893 |                |                |       |
| 91.47022728                                          | 117.1016089                              | 125.5405585                        |             |                |                |       |
| ENSG00000112695                                      | 1120.56216                               | 1394.746903                        | 1317.45159  |                |                |       |
| 1675.145116                                          | 1573.322046                              | 1568.471798                        | 1277.586884 |                |                |       |
| 1605.64632                                           | -0.32948168                              | 0.028964979                        | 1           | COX7A2         | 6              |       |
| 75237675                                             | 75250323                                 | -                                  | 1922        | protein_coding |                |       |
|                                                      | cytochrome c oxidase subunit 7A2         | [Source:HGNC                       |             |                |                |       |
| Symbol;Acc:HGNC:2288]                                | -                                        | 1165                               | 1603        | 1416           | 1520           | 1298  |
| 1699                                                 | 29.30716157                              | 36.3445032                         | 34.39187914 |                |                |       |
| 43.94426938                                          | 41.51152319                              | 41.10276269                        |             |                |                |       |

|                                    |                                                    |                      |                            |                |            |      |   |
|------------------------------------|----------------------------------------------------|----------------------|----------------------------|----------------|------------|------|---|
| ENSG00000203706                    | 7.694847448                                        | 11.31111026          | 14.88645864                |                |            |      |   |
| 26.44965973                        | 38.78760052                                        | 55.39041076          | 11.29747212                |                |            |      |   |
| 40.20922367                        | -1.832515956                                       | 0.029013813          | 1                          | SERTAD4-AS1    |            |      |   |
| 1                                  | 210231456                                          | 210234047            | -                          | 1004           |            |      |   |
| antisense                          | SERTAD4 antisense RNA 1 [Source:HGNC               |                      |                            |                |            |      |   |
| Symbol;Acc:HGNC:32019]             | -                                                  | 8                    | 13                         | 16             | 24         | 32   |   |
| 60                                 | 0.385263167                                        | 0.564245673          | 0.743930399                |                |            |      |   |
| 1.328279814                        | 1.959131672                                        | 2.778744114          |                            |                |            |      |   |
| ENSG00000185201                    | 904.1445751                                        | 1024.090521          | 1093.224307                |                |            |      |   |
| 1137.335368                        | 1635.139784                                        | 1214.896343          | 1007.153134                |                |            |      |   |
| 1329.123832                        | -0.399498129                                       | 0.029030879          | 1                          | IFITM2         | 11         |      |   |
| 307631                             | 315272                                             | +                    | 1543                       | protein_coding | interferon |      |   |
| induced transmembrane protein 2    | [Source:HGNC Symbol;Acc:HGNC:5413]                 |                      |                            |                |            |      |   |
| -                                  | 940                                                | 1177                 | 1175                       | 1032           | 1349       | 1316 |   |
| 29.45527922                        | 33.24062145                                        | 35.54822959          | 37.16428782                |                |            |      |   |
| 53.7394706                         | 39.65710264                                        |                      |                            |                |            |      |   |
| ENSG00000239254                    | 15.3896949                                         | 6.09059783           | 3.721614661                | 0              |            |      |   |
| 0                                  | 0                                                  | 8.400635795          | 0                          | 5.411646337    |            |      |   |
| 0.029046708                        | 1                                                  | AC009220.2           | 7                          | 139172516      |            |      |   |
| 139174266                          | -                                                  | 1751                 | processed_pseudogene       | Male-specific  |            |      |   |
| lethal-3 homolog 1 (Msl3l1)        | pseudogene -                                       |                      |                            |                |            |      |   |
| 0                                  | 0                                                  | 0                    | 0.441809503                | 0.174208961    |            |      |   |
| 0.106639937                        | 0                                                  | 0                    | 0                          |                |            |      |   |
| ENSG00000254088                    | 0                                                  | 0                    | 3.306207466                | 0              |            |      |   |
| 25.84885836                        | 0                                                  | 9.718355274          | -5.848413615               | 0.029080014    |            |      |   |
| 1                                  | SLC2A3P4                                           | 8                    | 86503591                   | 86505061       |            |      |   |
| +                                  | 1471                                               | processed_pseudogene | solute carrier family      |                |            |      |   |
| 2 member 3 pseudogene 4            | [Source:HGNC Symbol;Acc:HGNC:31076]                |                      |                            |                |            |      |   |
| 0                                  | 0                                                  | 0                    | 3                          | 0              | 28         | 0    | 0 |
| 0                                  | 0.113323669                                        | 0                    | 0.885067466                |                |            |      |   |
| ENSG00000110321                    | 16403.49105                                        | 17884.60548          | 16422.55509                |                |            |      |   |
| 20042.22966                        | 20050.76524                                        | 18735.80644          | 16903.55054                |                |            |      |   |
| 19609.60045                        | -0.214178877                                       | 0.029193564          | 0.208480881                | EIF4G2         |            |      |   |
| 11                                 | 10797050                                           | 10809110             | -                          | 8655           |            |      |   |
| protein_coding                     | eukaryotic translation initiation factor 4 gamma 2 |                      |                            |                |            |      |   |
| [Source:HGNC Symbol;Acc:HGNC:3297] | -                                                  | 17054                | 20555                      | 17651          |            |      |   |
| 18186                              | 16542                                              | 20295                | 95.27092962                | 103.4925306    |            |      |   |
| 95.20248368                        | 116.7567932                                        | 117.4811812          | 109.0317547                |                |            |      |   |
| ENSG00000166920                    | 0                                                  | 0                    | 0                          | 18.18168774    |            |      |   |
| 10.15490864                        | 0                                                  | 9.445532128          | -5.801514344               | 0.02919753     |            |      |   |
| 1                                  | C15orf48                                           | 15                   | 45430529                   | 45448761       |            |      |   |
| +                                  | 1405                                               | protein_coding       | chromosome 15 open reading |                |            |      |   |
| frame 48                           | [Source:HGNC Symbol;Acc:HGNC:29898]                |                      |                            |                |            |      |   |
| 0                                  | 0                                                  | 15                   | 11                         | 0              | 0          | 0    | 0 |
| 0.65623939                         | 0.364038553                                        |                      |                            |                |            |      |   |
| ENSG00000160957                    | 567.4949993                                        | 525.5315842          | 797.3559411                |                |            |      |   |
| 742.7946108                        | 887.2663619                                        | 990.5651792          | 630.1275082                |                |            |      |   |
| 873.5420506                        | -0.471755476                                       | 0.0292011            | 1                          | RECQL4         | 8          |      |   |
| 144511288                          | 144517845                                          | -                    | 4236                       | protein_coding |            |      |   |
| RecQ like helicase 4               | [Source:HGNC Symbol;Acc:HGNC:9949]                 |                      |                            |                |            |      |   |

|                                    |              |     |             |      |                          |       |                                                                      |
|------------------------------------|--------------|-----|-------------|------|--------------------------|-------|----------------------------------------------------------------------|
|                                    | 590          | 604 | 857         | 674  | 732                      | 1073  | 6.734374698                                                          |
|                                    | 6.21354696   |     | 9.444324622 |      | 8.841297182              |       | 10.62190688                                                          |
|                                    | 11.77808783  |     |             |      |                          |       |                                                                      |
| ENSG00000151665                    | 225.0742878  |     | 233.1828883 |      | 167.4726597              |       |                                                                      |
| 131.1462295                        | 134.5444893  |     | 106.164954  |      | 208.576612               |       |                                                                      |
| 123.9518909                        | 0.752481616  |     | 0.029235111 |      | 1                        | PIGF  | 2                                                                    |
|                                    | 46580937     |     | 46617119    |      | -                        | 4978  | protein_coding                                                       |
|                                    |              |     |             |      |                          |       | phosphatidylinositol glycan anchor biosynthesis class F              |
| [Source:HGNC Symbol;Acc:HGNC:8962] |              |     |             |      | -                        | 234   | 268 180                                                              |
|                                    | 119          | 111 | 115         |      | 2.272805029              |       | 2.346056676                                                          |
| 1.687965822                        | 1.328324285  |     | 1.370614894 |      | 1.074172343              |       |                                                                      |
| ENSG00000033122                    | 6.732991517  |     | 0.870085404 |      | 0                        |       | 19.8372448                                                           |
|                                    | 26.66647536  |     | 17.54029674 |      | 2.534358974              |       | 21.34800563                                                          |
|                                    | -3.084333664 |     | 0.029237883 |      | 1                        | LRRC7 | 1                                                                    |
| 69568398                           | 70151945     |     | +           |      | 14652                    |       | protein_coding                                                       |
|                                    |              |     |             |      |                          |       | leucine rich repeat containing 7 [Source:HGNC Symbol;Acc:HGNC:18531] |
|                                    | -            | 7   | 1           | 0    | 18                       | 22    | 19                                                                   |
| 0.023099488                        | 0.002974142  |     | 0           |      | 0.068263357              |       | 0.092293928                                                          |
|                                    | 0.06029589   |     |             |      |                          |       |                                                                      |
| ENSG00000162772                    | 150.0495252  |     | 220.1316073 |      | 152.5862011              |       |                                                                      |
| 314.0897093                        | 326.0582669  |     | 213.2530814 |      | 174.2557779              |       |                                                                      |
| 284.4670192                        | -0.704935406 |     | 0.029256168 |      | 1                        | ATF3  | 1                                                                    |
|                                    | 212565334    |     | 212620777   |      | +                        | 4040  | protein_coding                                                       |
|                                    |              |     |             |      |                          |       | activating transcription factor 3 [Source:HGNC                       |
| Symbol;Acc:HGNC:785]               |              |     | TF_bZIP     | 156  | 253                      | 164   | 285 269                                                              |
|                                    | 231          |     | 1.867000567 |      | 2.728963668              |       | 1.894996965                                                          |
| 3.91990497                         | 4.092778818  |     | 2.658652846 |      |                          |       |                                                                      |
| ENSG000000257310                   | 26.93196607  |     | 0.870085404 |      | 0.930403665              |       | 0                                                                    |
|                                    | 0            |     | 9.577485045 |      | 0                        |       | 5.600014521                                                          |
| 0.029277577                        | 1            |     | AL589743.1  |      | 14                       |       | 19244962                                                             |
| 19247673                           | +            |     | 2712        |      | lincRNA novel transcript |       | -                                                                    |
|                                    | 28           | 1   | 1           | 0    | 0                        | 0     | 0.499194237                                                          |
|                                    | 0.016068262  |     | 0.017212991 |      | 0                        |       | 0                                                                    |
| ENSG00000182752                    | 303.9464742  |     | 341.0734785 |      | 280.0515032              |       |                                                                      |
| 177.433134                         | 183.02899    |     | 239.1019398 |      | 308.357152               |       |                                                                      |
| 199.8546879                        | 0.624055915  |     | 0.029281595 |      | 1                        | PAPPA | 9                                                                    |
|                                    | 116153804    |     | 116402322   |      | +                        | 11573 | protein_coding                                                       |
|                                    |              |     |             |      |                          |       | pappalysin 1 [Source:HGNC Symbol;Acc:HGNC:8602] - 316                |
|                                    | 392          | 301 | 161         | 151  | 259                      |       | 1.320207957                                                          |
| 1.476041988                        | 1.214133881  |     | 0.7730222   |      | 0.802007361              |       |                                                                      |
| 1.040602414                        |              |     |             |      |                          |       |                                                                      |
| ENSG00000132485                    | 3369.381326  |     | 3342.868123 |      | 3129.87793               |       |                                                                      |
| 2437.776972                        | 3042.402416  |     | 2600.579785 |      | 3280.709126              |       |                                                                      |
| 2693.586391                        | 0.284777242  |     | 0.029292367 |      | 0.208480881              |       | ZRANB2                                                               |
|                                    | 1            |     | 71063291    |      | 71081297                 |       | - 4993                                                               |
|                                    |              |     |             |      |                          |       | protein_coding zinc finger RANBP2-type containing 2 [Source:HGNC     |
| Symbol;Acc:HGNC:13058]             |              |     | -           | 3503 | 3842                     | 3364  | 2212 2510                                                            |
|                                    | 2817         |     | 33.92187018 |      | 33.53160891              |       | 31.45143439                                                          |
| 24.6170269                         | 30.90007373  |     | 26.23350376 |      |                          |       |                                                                      |
| ENSG00000236552                    | 2171.870692  |     | 2937.408325 |      | 2328.800374              |       |                                                                      |



|                                  |                                     |                       |              |                |            |
|----------------------------------|-------------------------------------|-----------------------|--------------|----------------|------------|
| 2868.686012                      | 3146.644092                         | 3245.878071           | 2479.359797  |                |            |
| 3087.069392                      | -0.316151163                        | 0.029296333           | 0.208480881  |                |            |
| RPL13AP5                         | 10                                  | 96750288              | 96750899     | +              | 612        |
|                                  | processed_pseudogene                | ribosomal             | protein L13a | pseudogene     | 5          |
| [Source:HGNC                     | Symbol;Acc:HGNC:23736]              | -                     | 2258         | 3376           | 2503       |
| 2603                             | 2596                                | 3516                  | 178.3913253  | 240.386245     |            |
| 190.921775                       | 236.3386713                         | 260.7357764           | 267.1335665  |                |            |
| ENSG00000140199                  | 1267.726117                         | 1307.738363           | 1203.011939  |                |            |
| 914.717399                       | 913.9328373                         | 1123.502165           | 1259.49214   |                |            |
| 984.0508004                      | 0.35523855                          | 0.029310833           | 1            | SLC12A6        | 15         |
| 34229996                         | 34338060                            | -                     | 10056        | protein_coding |            |
|                                  | solute carrier family 12 member 6   | [Source:HGNC          |              |                |            |
| Symbol;Acc:HGNC:10914]           | -                                   | 1318                  | 1503         | 1293           | 830        |
| 1217                             | 6.337111698                         | 6.513168498           | 6.002322086  | 754            |            |
| 4.58632547                       | 4.608859207                         | 5.627251579           |              |                |            |
| ENSG00000204070                  | 735.8197872                         | 692.5879818           | 640.1177217  |                |            |
| 792.3877227                      | 865.4483366                         | 1109.654562           | 689.5084969  |                |            |
| 922.4968739                      | -0.420863194                        | 0.02938973            | 1            | SYS1           | 20         |
| 45361937                         | 45376798                            | +                     | 6117         | protein_coding |            |
| "SYS1, golgi trafficking protein | [Source:HGNC                        |                       |              |                |            |
| Symbol;Acc:HGNC:16162]"          | -                                   | 765                   | 796          | 688            | 719        |
| 1202                             | 6.046780044                         | 5.670654467           | 5.25044355   | 714            |            |
| 6.531342425                      | 7.174755263                         | 9.136860733           |              |                |            |
| ENSG00000132434                  | 1163.845676                         | 1324.269985           | 1630.997625  |                |            |
| 1594.694068                      | 1744.229911                         | 1965.436409           | 1373.037762  |                |            |
| 1768.120129                      | -0.365088908                        | 0.02941845            | 1            | LANCL2         | 7          |
| 55365448                         | 55433742                            | +                     | 5235         | protein_coding |            |
| LanC like 2                      | [Source:HGNC                        | Symbol;Acc:HGNC:6509] | -            | 1210           |            |
| 1522                             | 1753                                | 1447                  | 1439         | 2129           | 11.1755756 |
| 12.66941506                      | 15.63188192                         | 15.35903354           | 16.8962944   |                |            |
| 18.90993315                      |                                     |                       |              |                |            |
| ENSG00000159685                  | 264.510381                          | 210.5606678           | 242.8353566  |                |            |
| 322.9062625                      | 305.4523541                         | 469.895318            | 239.3021352  |                |            |
| 366.0846449                      | -0.615299368                        | 0.029420155           | 1            | CHCHD6         | 3          |
| 126704220                        | 126960406                           | +                     | 2763         | protein_coding |            |
|                                  | coiled-coil-helix-coiled-coil-helix | domain containing 6   |              |                |            |
| [Source:HGNC                     | Symbol;Acc:HGNC:28184]              | -                     | 275          | 242            | 261        |
| 293                              | 252                                 | 509                   | 4.812303677  | 3.816744415    |            |
| 4.409665616                      | 5.892488981                         | 5.60617972            | 8.565799715  |                |            |
| ENSG00000232888                  | 56.74949993                         | 46.98461183           | 62.33704557  |                |            |
| 13.22482987                      | 31.51492542                         | 10.15490864           | 55.35705244  |                |            |
| 18.29822131                      | 1.607019343                         | 0.029472034           | 1            | RPS11P5        | 12         |
| 132825701                        | 132826184                           | +                     | 484          |                |            |
| processed_pseudogene             | ribosomal                           | protein S11           | pseudogene   | 5              |            |
| [Source:HGNC                     | Symbol;Acc:HGNC:36312]              | -                     | 59           | 54             | 67         |
| 12                               | 26                                  | 11                    | 5.89396926   | 4.861910903    |            |
| 6.462126821                      | 1.37767865                          | 3.301986904           | 1.056764807  |                |            |
| ENSG00000091164                  | 1925.635574                         | 2134.319497           | 2007.811109  |                |            |
| 2216.261072                      | 2630.28416                          | 2583.039489           | 2022.588727  |                |            |
| 2476.52824                       | -0.292041415                        | 0.029529523           | 1            | TXNL1          | 18         |

|                                                                |              |                      |                              |                |
|----------------------------------------------------------------|--------------|----------------------|------------------------------|----------------|
| 56597208                                                       | 56651600     | -                    | 11298                        | protein_coding |
| thioredoxin like 1 [Source:HGNC Symbol;Acc:HGNC:12436] -       |              |                      |                              |                |
| 2002                                                           | 2453         | 2158                 | 2011                         | 2170           |
| 2798                                                           | 8.567689506  | 9.461381961          | 8.91653063                   | 9.890597849    |
| 11.51535041                                                    |              |                      |                              | 11.80607461    |
| ENSG0000075415                                                 | 6182.809924  | 6404.698661          | 7366.936221                  |                |
| 7452.191629                                                    | 8059.336121  | 8183.010017          | 6651.481602                  |                |
| 7898.179256                                                    | -0.247872149 | 0.029544769          | 0.20943705                   |                |
| SLC25A3                                                        | 12           | 98593591             | 98606379                     | + 8896         |
| protein_coding solute carrier family 25 member 3 [Source:HGNC  |              |                      |                              |                |
| Symbol;Acc:HGNC:10989] - 6428 7361 7918 6762 6649              |              |                      |                              |                |
| 8864                                                           | 34.93673457  | 36.05791754          | 41.54959157                  |                |
| 42.23693894                                                    | 45.94189648  | 46.33039376          |                              |                |
| ENSG00000271716                                                | 20.19897455  | 0                    | 10.23444032                  | 0 0            |
| 0                                                              | 10.14447162  | 0                    | 5.683368511                  | 0.029545519    |
| 1                                                              | AC022001.2   | 3                    | 11607184                     | 11610748       |
| +                                                              | 580          | antisense            | "novel transcript, antisense |                |
| to VGLL4" - 21 0 11 0 0 0                                      |              |                      |                              |                |
| 1.750622547                                                    | 0            | 0.885341307          | 0                            | 0 0            |
| ENSG00000234751                                                | 20.19897455  | 0                    | 10.23444032                  | 0 0            |
| 0                                                              | 10.14447162  | 0                    | 5.683368511                  | 0.029545519    |
| 1                                                              | AP002381.1   | 11                   | 72940498                     | 72941112       |
| +                                                              | 615          | processed_pseudogene | ribosomal protein L15        |                |
| (RPL15) pseudogene - 21 0 11 0 0                               |              |                      |                              |                |
| 0                                                              | 1.650993622  | 0                    | 0.834956029                  | 0 0            |
| 0                                                              |              |                      |                              |                |
| ENSG00000176349                                                | 35.58866945  | 18.27179349          | 14.88645864                  | 0              |
| 7.272675098                                                    | 0            | 22.91564053          | 2.424225033                  |                |
| 3.284775426                                                    | 0.029572848  | 1                    | AC104129.1                   | 7              |
| 1838586                                                        | 1849931      | +                    | 4764                         | antisense      |
| antisense to MAD1L1" - 37 21 16 0 6                            |              |                      |                              |                |
| 0                                                              | 0.375518371  | 0.192090612          | 0.156781302                  | 0              |
| 0.07741531                                                     | 0            |                      |                              |                |
| ENSG00000138688                                                | 1472.60143   | 1350.372547          | 1399.327112                  |                |
| 1355.545061                                                    | 901.8117121  | 941.636983           | 1407.433697                  |                |
| 1066.331252                                                    | 0.400432149  | 0.029597468          | 1                            | KIAA1109       |
| 4                                                              | 122152333    | 122362758            | +                            | 20470          |
| protein_coding KIAA1109 [Source:HGNC Symbol;Acc:HGNC:26953] -  |              |                      |                              |                |
| 1531                                                           | 1552         | 1504                 | 1230                         | 744            |
| 1020                                                           | 3.616250981  | 3.303942435          | 3.429857126                  | 3.338868481    |
| 2.2340992                                                      |              |                      |                              | 2.316932317    |
| ENSG00000167085                                                | 2467.160463  | 2133.449411          | 2548.375639                  |                |
| 2692.354947                                                    | 2866.646101  | 3203.412089          | 2382.995171                  |                |
| 2920.804379                                                    | -0.293946332 | 0.02966436           | 0.209476018                  | PHB            |
| 17                                                             | 49404049     | 49414905             | -                            | 3838           |
| protein_coding prohibitin [Source:HGNC Symbol;Acc:HGNC:8912] - |              |                      |                              |                |
| 2565                                                           | 2452         | 2739                 | 2443                         | 2365           |
| 3470                                                           | 32.31347134  | 27.84031169          | 33.31448452                  | 35.36963192    |
| 37.87682216                                                    |              | 42.03930451          |                              |                |
| ENSG00000100347                                                | 1067.660083  | 1261.623836          | 1169.517407                  |                |

|                                                                    |              |             |                        |                |                  |
|--------------------------------------------------------------------|--------------|-------------|------------------------|----------------|------------------|
| 1249.746422                                                        | 1589.079509  | 1652.480588 | 1166.267109            |                |                  |
| 1497.102173                                                        | -0.360310458 | 0.029774771 | 1                      | SAMM50         | 22               |
| 43955421                                                           | 44010531     | +           | 6435                   | protein_coding |                  |
| SAMM50 sorting and assembly machinery component [Source:HGNC       |              |             |                        |                |                  |
| Symbol;Acc:HGNC:24276]                                             | -            | 1110        | 1450                   | 1257           | 1134 1311        |
| 1790                                                               | 8.340184229  | 9.819243926 | 9.118696522            |                |                  |
| 9.792115941                                                        | 12.52280162  | 12.93407866 |                        |                |                  |
| ENSG00000196372                                                    | 838.7383718  | 689.1076402 | 974.1326375            |                |                  |
| 1033.740868                                                        | 1053.325777  | 1217.665863 | 833.9928831            |                |                  |
| 1101.577503                                                        | -0.402133618 | 0.029804169 | 1                      | ASB13          | 10               |
| 5638867                                                            | 5666595      | -           | 3003                   | protein_coding | ankyrin repeat   |
| and SOCS box containing 13 [Source:HGNC Symbol;Acc:HGNC:19765] -   |              |             |                        |                |                  |
| 872                                                                | 792          | 1047        | 938                    | 869            | 1319 14.03984681 |
| 11.49286875                                                        | 16.27561415  | 17.35639598 | 17.78737268            |                |                  |
| 20.4230444                                                         |              |             |                        |                |                  |
| ENSG0000005022                                                     | 7457.269033  | 6815.378971 | 6590.049161            |                |                  |
| 8997.292585                                                        | 8115.093297  | 7632.798603 | 6954.232388            |                |                  |
| 8248.394828                                                        | -0.246175106 | 0.029847341 | 0.209960607            |                |                  |
| SLC25A5 X                                                          | 119468400    | 119471319   | +                      | 1500           |                  |
| protein_coding solute carrier family 25 member 5 [Source:HGNC      |              |             |                        |                |                  |
| Symbol;Acc:HGNC:10991]                                             | -            | 7753        | 7833                   | 7083           | 8164 6695        |
| 8268                                                               | 249.9077598  | 227.559759  | 220.4306689            |                |                  |
| 302.4292418                                                        | 274.3510853  | 256.2950551 |                        |                |                  |
| ENSG00000179632                                                    | 3308.784402  | 3188.863007 | 3666.720845            |                |                  |
| 3389.964722                                                        | 4530.876586  | 4712.800782 | 3388.122751            |                |                  |
| 4211.21403                                                         | -0.313875342 | 0.029979679 | 0.210086606            |                | MAF1             |
| 8                                                                  | 144104499    | 144107611   | +                      | 2377           |                  |
| protein_coding "MAF1 homolog, negative regulator of RNA polymerase |              |             |                        |                |                  |
| III [Source:HGNC Symbol;Acc:HGNC:24966]" -                         |              |             |                        |                |                  |
| 3941                                                               | 3076         | 3738        | 5105                   | 69.9729973     | 67.18980722      |
| 77.39685061                                                        | 71.90667265  | 96.6623781  | 99.86138448            |                |                  |
| ENSG00000283752                                                    | 4.809279655  | 10.44102485 | 9.304036652            | 0              |                  |
| 0                                                                  | 0            | 8.184780386 | 0                      | 5.375293965    |                  |
| 0.030027742                                                        | 1            | AC241585.3  | 1                      | 145139986      |                  |
| 145148375                                                          | +            | 686         | unprocessed_pseudogene |                |                  |
| phosphodiesterase 4D interacting protein (PDE4DIP) pseudogene -    |              |             |                        |                |                  |
| 5                                                                  | 12           | 10          | 0                      | 0              | 0.352409093      |
| 0.762282111                                                        | 0.68049027   | 0           | 0                      | 0              |                  |
| ENSG00000249456                                                    | 31.74124572  | 22.62222051 | 61.4066419             |                |                  |
| 14.32689902                                                        | 0            | 8.308561615 | 38.59003604            | 7.545153545    |                  |
| 2.345463994                                                        | 0.030032549  | 1           | AL731577.2             | 10             |                  |
| 124917143                                                          | 124942881    | +           | 555                    |                |                  |
| sense_overlapping "novel transcript, sense overlapping ZRANB1"     |              |             |                        |                |                  |
| -                                                                  | 33           | 26          | 66                     | 13             | 0 9              |
| 2.874896229                                                        | 2.041451011  | 5.551329277 | 1.301554664            | 0              |                  |
| 0.75401597                                                         |              |             |                        |                |                  |
| ENSG00000074800                                                    | 86276.55329  | 85170.04997 | 119783.8895            |                |                  |
| 105254.2168                                                        | 140622.0215  | 115919.2053 | 97076.83091            |                |                  |
| 120598.4812                                                        | -0.313007584 | 0.030218445 | 0.210954623            |                | EN01             |
| 1                                                                  | 8861000      | 8879250     | -                      | 5276           | protein_coding   |

|                                                                |   |                       |       |  |  |  |
|----------------------------------------------------------------|---|-----------------------|-------|--|--|--|
| enolase 1 [Source:HGNC Symbol;Acc:HGNC:3350]                   | - | 89698                 | 97887 |  |  |  |
| 128744 95506 116014 125566 822.0139528                         |   | 808.4977758           |       |  |  |  |
| 1139.116774 1005.860869 1351.614911                            |   | 1106.619429           |       |  |  |  |
| ENSG00000240270 0 0 0 12.12276071                              |   | 0                     |       |  |  |  |
| 15.69394972 0 9.272236809 -5.77876616                          |   | 0.030293343           |       |  |  |  |
| 1 RPL12P37 17 80976454                                         |   | 80976948              |       |  |  |  |
| + 495 processed_pseudogene                                     |   | ribosomal protein L12 |       |  |  |  |
| pseudogene 37 [Source:HGNC Symbol;Acc:HGNC:35565]              | - | 0                     |       |  |  |  |
| 0 0 11 0 17 0 0 0                                              |   |                       |       |  |  |  |
| 1.234808271 0 1.596889041                                      |   |                       |       |  |  |  |
| ENSG00000182544 582.8846942 515.9606447                        |   | 669.8906389           |       |  |  |  |
| 560.9532001 938.1750876 1034.877508                            |   | 589.5786593           |       |  |  |  |
| 844.6685985 -0.519232953 0.03029337                            |   | 1 MFS05               | 12    |  |  |  |
| 53251251 53254405 + 2581                                       |   | protein_coding        |       |  |  |  |
| major facilitator superfamily domain containing 5 [Source:HGNC |   |                       |       |  |  |  |
| Symbol;Acc:HGNC:28156] - 606 593 720 509 774                   |   |                       |       |  |  |  |
| 1121 11.35235167 10.01210249 13.0223849                        |   |                       |       |  |  |  |
| 10.95826558 18.43318222 20.19522175                            |   |                       |       |  |  |  |
| ENSG00000108179 2701.85331 3025.286951                         |   | 2838.661582           |       |  |  |  |
| 3004.240518 3585.428823 3900.408091                            |   | 2855.267281           |       |  |  |  |
| 3496.692477 -0.292485155 0.030387756                           |   | 0.211333031           | PPIF  |  |  |  |
| 10 79347469 79355337 + 2674                                    |   |                       |       |  |  |  |
| protein_coding peptidylprolyl isomerase F [Source:HGNC         |   |                       |       |  |  |  |
| Symbol;Acc:HGNC:9259] - 2809 3477 3051 2726 2958               |   |                       |       |  |  |  |
| 4225 50.79156011 56.66330285 53.26314919                       |   |                       |       |  |  |  |
| 56.64694489 67.99611926 73.46768047                            |   |                       |       |  |  |  |
| ENSG00000023697 493.4320926 408.0700546                        |   | 441.0113373           |       |  |  |  |
| 742.7946108 557.5717575 563.1358428                            |   | 447.5044948           |       |  |  |  |
| 621.1674037 -0.473218386 0.030427371                           |   | 1 DERA                | 12    |  |  |  |
| 15911172 16037282 + 2844                                       |   | protein_coding        |       |  |  |  |
| deoxyribose-phosphate aldolase [Source:HGNC                    |   |                       |       |  |  |  |
| Symbol;Acc:HGNC:24269] - 513 469 474 674 460                   |   |                       |       |  |  |  |
| 610 8.721455908 7.186242169 7.780272093                        |   |                       |       |  |  |  |
| 13.16868315 9.942042145 9.97312497                             |   |                       |       |  |  |  |
| ENSG00000241278 0 8.700854042 21.3992843                       |   | 0                     | 0     |  |  |  |
| 0 10.03337945 0 5.668859247                                    |   | 0.030495827           |       |  |  |  |
| 1 ENPP7P4 3 125848223 125909372 +                              |   |                       |       |  |  |  |
| 1086 transcribed_unprocessed_pseudogene                        |   | ectonucleotide        |       |  |  |  |
| pyrophosphatase/phosphodiesterase 7 pseudogene 4 [Source:HGNC  |   |                       |       |  |  |  |
| Symbol;Acc:HGNC:48687] - 0 10 23 0 0                           |   |                       |       |  |  |  |
| 0 0 0.401262683 0.98865336 0 0                                 |   |                       |       |  |  |  |
| 0                                                              |   |                       |       |  |  |  |
| ENSG00000168280 252.9681098 419.3811648                        |   | 276.3298886           |       |  |  |  |
| 260.0883207 149.0898395 165.2480588                            |   | 316.2263877           |       |  |  |  |
| 191.4754063 0.724313615 0.030507303                            |   | 1 KIF5C               | 2     |  |  |  |
| 148875250 149026759 + 9215                                     |   | protein_coding        |       |  |  |  |
| kinesin family member 5C [Source:HGNC Symbol;Acc:HGNC:6325]    |   |                       |       |  |  |  |
| - 263 482 297 236 123 179                                      |   |                       |       |  |  |  |
| 1.379944518 2.279346216 1.504551803                            |   | 1.423078008           |       |  |  |  |
| 0.82045947 0.903209942                                         |   |                       |       |  |  |  |

|                                                                 |              |                        |             |                |      |      |
|-----------------------------------------------------------------|--------------|------------------------|-------------|----------------|------|------|
| ENSG00000111696                                                 | 688.6888466  | 472.4563745            | 540.5645295 |                |      |      |
| 486.0124975                                                     | 253.3315159  | 389.5792224            | 567.2365835 |                |      |      |
| 376.3077453                                                     | 0.59078159   | 0.030509255            | 1           | NT5DC3         | 12   |      |
| 103770453                                                       | 103841197    | -                      | 8722        | protein_coding |      |      |
| 5'-nucleotidase domain containing 3 [Source:HGNC                |              |                        |             |                |      |      |
| Symbol;Acc:HGNC:30826]                                          | -            | 716                    | 543         | 581            | 441  | 209  |
| 422                                                             | 3.969155891  | 2.712953469            | 3.109611157 |                |      |      |
| 2.809535673                                                     | 1.47291459   | 2.249714393            |             |                |      |      |
| ENSG00000160211                                                 | 1640.926218  | 1617.488766            | 1683.10023  |                |      |      |
| 1868.007218                                                     | 2557.557409  | 1850.03972             | 1647.171738 |                |      |      |
| 2091.868116                                                     | -0.344247025 | 0.030552685            | 1           | G6PD           | X    |      |
| 154531390                                                       | 154547572    | -                      | 3995        | protein_coding |      |      |
| glucose-6-phosphate dehydrogenase [Source:HGNC                  |              |                        |             |                |      |      |
| Symbol;Acc:HGNC:4057]                                           | -            | 1706                   | 1859        | 1809           | 1695 | 2110 |
| 2004                                                            | 20.64730911  | 20.27781721            | 21.13819106 |                |      |      |
| 23.57571987                                                     | 32.46482243  | 23.324479              |             |                |      |      |
| ENSG00000223791                                                 | 0            | 0                      | 35.15126297 | 0              |      |      |
| 0                                                               | 11.71708766  | -6.110070486           | 0.030563963 | 1              |      |      |
| UBE2E1-AS1                                                      | 3            | 23804024               | 23806905    | -              |      |      |
| 778                                                             | antisense    | UBE2E1 antisense RNA 1 |             |                |      |      |
| [Source:HGNC                                                    |              |                        |             |                |      |      |
| Symbol;Acc:HGNC:40598]                                          | -            | 0                      | 0           | 0              | 0    | 29   |
| 0                                                               | 0            | 0                      | 2.291214563 | 0              |      |      |
| ENSG00000089327                                                 | 2923.080174  | 2772.962183            | 3703.936991 |                |      |      |
| 3387.760584                                                     | 4135.727906  | 4194.900442            | 3133.32645  |                |      |      |
| 3906.129644                                                     | -0.318146098 | 0.030602589            | 0.212023978 | FXYD5          |      |      |
| 19                                                              | 35154730     | 35169883               | + 2993      |                |      |      |
| protein_coding FXYD domain containing ion transport regulator 5 |              |                        |             |                |      |      |
| [Source:HGNC Symbol;Acc:HGNC:4029]                              |              |                        |             |                |      |      |
| 3074                                                            | 3412         | 4544                   | 49.09363617 | 46.40170561    |      |      |
| 62.09140635                                                     | 57.07017312  | 70.07283135            | 70.59316018 |                |      |      |
| ENSG00000254094                                                 | 12.5041271   | 17.40170808            | 0           | 0              | 0    |      |
| 0                                                               | 9.968611729  | 0                      | 5.659683821 | 0.030607682    |      |      |
| 1                                                               | AC078852.2   | 4                      | 1356581     | 1358075        | +    | 527  |
| sense_intronic novel transcript                                 |              |                        |             |                |      |      |
| 0                                                               | 0            | 0                      | 1.192707509 | 1.653780924    | 13   | 20   |
| 0                                                               | 0            | 0                      |             |                |      |      |
| ENSG00000115464                                                 | 2383.478997  | 1651.422097            | 2014.323935 |                |      |      |
| 1742.371335                                                     | 1543.019233  | 1432.765292            | 2016.408343 |                |      |      |
| 1572.71862                                                      | 0.358539129  | 0.030633054            | 1           | USP34          | 2    |      |
| 61187463                                                        | 61470769     | -                      | 18125       | protein_coding |      |      |
| ubiquitin specific peptidase 34 [Source:HGNC                    |              |                        |             |                |      |      |
| Symbol;Acc:HGNC:20066]                                          | -            | 2478                   | 1898        | 2165           | 1581 | 1273 |
| 1552                                                            | 6.610350738  | 4.563276564            | 5.576040523 |                |      |      |
| 4.846920521                                                     | 4.317156064  | 3.981481662            |             |                |      |      |
| ENSG00000104133                                                 | 1098.439473  | 962.3144571            | 979.7150594 |                |      |      |
| 895.9822234                                                     | 767.2672228  | 636.0665503            | 1013.489663 |                |      |      |
| 766.4386655                                                     | 0.403741282  | 0.030638398            | 1           | SPG11          | 15   |      |
| 44562696                                                        | 44663678     | -                      | 11853       | protein_coding |      |      |
| "SPG11, spatacsin vesicle trafficking associated [Source:HGNC   |              |                        |             |                |      |      |
| Symbol;Acc:HGNC:11226]"                                         | -            | 1142                   | 1106        | 1053           | 813  | 633  |

|                                                              |                      |                        |              |                      |             |
|--------------------------------------------------------------|----------------------|------------------------|--------------|----------------------|-------------|
| 689                                                          | 4.65842423           | 4.066169143            | 4.147115421  |                      |             |
| 3.811310267                                                  | 3.282636437          | 2.70285007             |              |                      |             |
| ENSG00000117448                                              | 1589.947854          | 1342.541779            | 1714.733955  |                      |             |
| 1895.558947                                                  | 2175.741967          | 1783.571227            | 1549.074529  |                      |             |
| 1951.624047                                                  | -0.333025109         | 0.030640618            | 1            | AKR1A1               | 1           |
| 45550543                                                     | 45570049             | +                      | 3121         | protein_coding       |             |
| aldo-keto reductase family 1 member A1 [Source:HGNC          |                      |                        |              |                      |             |
| Symbol;Acc:HGNC:380]                                         | -                    | 1653                   | 1543         | 1843                 | 1720 1795   |
| 1932                                                         | 25.60827361          | 21.544219              | 27.56624441  |                      |             |
| 30.62292861                                                  | 35.35233016          | 28.78355101            |              |                      |             |
| ENSG00000185697                                              | 436.6825926          | 377.6170654            | 367.5094478  |                      |             |
| 920.2277448                                                  | 507.8751443          | 398.8109575            | 393.9363686  |                      |             |
| 608.9712822                                                  | -0.627958766         | 0.03066696             | 1            | MYBL1                | 8           |
| 66562175                                                     | 66614247             | -                      | 7239         | protein_coding       |             |
| MYB proto-oncogene like 1 [Source:HGNC Symbol;Acc:HGNC:7547] |                      |                        |              |                      |             |
| MYB                                                          | 454                  | 434                    | 395          | 835                  | 419 432     |
| 3.032344175                                                  | 2.612580919          | 2.547208849            | 6.409437877  |                      |             |
| 3.557810451                                                  | 2.774828767          |                        |              |                      |             |
| ENSG00000119681                                              | 1709.217989          | 1231.170847            | 1586.338249  |                      |             |
| 1325.789194                                                  | 1090.901265          | 1062.572713            | 1508.909028  |                      |             |
| 1159.754391                                                  | 0.3796244            | 0.030682115            | 1            | LTBP2                | 14          |
| 74498170                                                     | 74612378             | -                      | 9091         | protein_coding       |             |
| latent transforming growth factor beta binding protein 2     |                      |                        |              |                      |             |
| [Source:HGNC Symbol;Acc:HGNC:6715]                           | -                    |                        | 1777         | 1415                 | 1705        |
| 1203                                                         | 900                  | 1151                   | 9.450983099  | 6.782712045          |             |
| 8.755052635                                                  | 7.353024503          | 6.085247013            | 5.887008786  |                      |             |
| ENSG00000240793                                              | 0                    | 0                      | 0            | 9.918622399          | 18.18168774 |
| 0                                                            | 0                    | 9.366770048            | -5.787065179 | 0.0306999            |             |
| 1                                                            | UBA52P8              | 16                     | 48334471     | 48334854             | -           |
| 384                                                          | processed_pseudogene | ubiquitin A-52 residue |              |                      |             |
| ribosomal protein fusion product 1 pseudogene 8 [Source:HGNC |                      |                        |              |                      |             |
| Symbol;Acc:HGNC:35625]                                       | -                    | 0                      | 0            | 0                    | 9 15        |
| 0                                                            | 0                    | 0                      | 0            | 1.302336848          | 2.401084227 |
| 0                                                            |                      |                        |              |                      |             |
| ENSG00000180673                                              | 1.923711862          | 0                      | 0.930403665  | 9.918622399          |             |
| 9.69690013                                                   | 19.38664377          | 0.951371842            | 13.0007221   |                      |             |
| -3.792744304                                                 | 0.030738905          | 1                      | EXOC5P1      | 4                    |             |
| 62816826                                                     | 62818794             | +                      | 1969         | processed_pseudogene |             |
| exocyst complex component 5 pseudogene 1 [Source:HGNC        |                      |                        |              |                      |             |
| Symbol;Acc:HGNC:43870]                                       | -                    | 2                      | 0            | 1                    | 9 8         |
| 21                                                           | 0.04911176           | 0                      | 0.023708295  | 0.253985449          |             |
| 0.249742026                                                  | 0.495911976          |                        |              |                      |             |
| ENSG00000165525                                              | 565.5712874          | 494.2085096            | 485.6707132  |                      |             |
| 411.071795                                                   | 357.5731923          | 340.6510262            | 515.1501701  |                      |             |
| 369.7653378                                                  | 0.478619754          | 0.030755889            | 1            | NEMF                 | 14          |
| 49782083                                                     | 49853203             | -                      | 9426         | protein_coding       |             |
| nuclear export mediator factor [Source:HGNC                  |                      |                        |              |                      |             |
| Symbol;Acc:HGNC:10663]                                       | -                    | 588                    | 568          | 522                  | 373 295     |
| 369                                                          | 3.016137297          | 2.62590795             | 2.585169976  |                      |             |
| 2.198839044                                                  | 1.923720357          | 1.820245428            |              |                      |             |

|                                                  |                                                                     |             |             |                |             |      |
|--------------------------------------------------|---------------------------------------------------------------------|-------------|-------------|----------------|-------------|------|
| ENSG00000140961                                  | 837.7765159                                                         | 703.0290066 | 967.6198118 |                |             |      |
| 792.3877227                                      | 1293.324055                                                         | 1418.917689 | 836.1417781 |                |             |      |
| 1168.209822                                      | -0.482940868                                                        | 0.030768713 | 1           | OSGIN1         | 16          |      |
| 83948282                                         | 83966332                                                            | +           | 3460        | protein_coding |             |      |
|                                                  | oxidative stress induced growth inhibitor 1 [Source:HGNC            |             |             |                |             |      |
| Symbol;Acc:HGNC:30093]                           | -                                                                   | 871         | 808         | 1040           | 719         | 1067 |
| 1537                                             | 12.17147672                                                         | 10.17639275 | 14.03147337 |                |             |      |
| 11.54688486                                      | 18.95551904                                                         | 20.65517062 |             |                |             |      |
| ENSG00000150593                                  | 440.5300164                                                         | 590.7879895 | 588.0151164 |                |             |      |
| 443.0318005                                      | 306.6644666                                                         | 376.6547932 | 539.7777074 |                |             |      |
| 375.4503534                                      | 0.523375129                                                         | 0.030812063 | 1           | PDCD4          | 10          |      |
| 110871795                                        | 110900006                                                           | +           | 4547        | protein_coding |             |      |
|                                                  | programmed cell death 4 [Source:HGNC Symbol;Acc:HGNC:8763]          |             |             |                |             |      |
| -                                                | 458                                                                 | 679         | 632         | 402            | 253         | 408  |
| 4.870143301                                      | 6.507338789                                                         | 6.488408132 | 4.912619667 |                |             |      |
| 3.420132466                                      | 4.172210647                                                         |             |             |                |             |      |
| ENSG00000157021                                  | 2.885567793                                                         | 44.37435562 | 27.91210996 |                |             |      |
| 89.26760159                                      | 58.18140078                                                         | 91.39417776 | 25.05734445 |                |             |      |
| 79.61439338                                      | -1.665377562                                                        | 0.030884511 | 1           | FAM92A1P1      |             |      |
| 15                                               | 41163162                                                            | 41164374    | +           | 890            |             |      |
|                                                  | unprocessed_pseudogene family with sequence similarity 92 member A1 |             |             |                |             |      |
| pseudogene 1 [Source:HGNC Symbol;Acc:HGNC:32278] | -                                                                   |             |             |                |             | 3    |
| 51                                               | 30                                                                  | 81          | 48          | 99             | 0.162979306 |      |
| 2.497116287                                      | 1.573538176                                                         | 5.057164212 | 3.315114942 |                |             |      |
| 5.172210672                                      |                                                                     |             |             |                |             |      |
| ENSG00000189007                                  | 316.4506013                                                         | 310.6204893 | 321.9196682 |                |             |      |
| 166.4124425                                      | 199.9985652                                                         | 252.026369  | 316.3302529 |                |             |      |
| 206.1457922                                      | 0.616047383                                                         | 0.030985542 | 1           | ADAT2          | 6           |      |
| 143422832                                        | 143450673                                                           | -           | 7175        | protein_coding |             |      |
|                                                  | "adenosine deaminase, tRNA specific 2 [Source:HGNC                  |             |             |                |             |      |
| Symbol;Acc:HGNC:21172]"                          | -                                                                   | 329         | 357         | 346            | 151         | 165  |
| 273                                              | 2.217048578                                                         | 2.1682278   | 2.251128204 |                |             |      |
| 1.16941076                                       | 1.41354422                                                          | 1.769178935 |             |                |             |      |
| ENSG00000273456                                  | 49.05465248                                                         | 20.8820497  | 28.84251362 |                |             | 0    |
| 13.33323768                                      | 0                                                                   | 32.92640527 | 4.44441256  |                |             |      |
| 2.919746964                                      | 0.031004024                                                         | 1           | AC064836.3  | 2              |             |      |
| 202374932                                        | 202375604                                                           | -           | 673         | lincRNA novel  |             |      |
| transcript                                       | -                                                                   | 51          | 24          | 31             | 0           | 11   |
| 3.664007284                                      | 1.554013457                                                         | 2.150268364 | 0           |                |             | 0    |
| 1.004673579                                      | 0                                                                   |             |             |                |             |      |
| ENSG00000111261                                  | 115.4227117                                                         | 96.57947987 | 117.2308618 |                |             |      |
| 67.22621848                                      | 43.63605059                                                         | 51.69771671 | 109.7443511 |                |             |      |
| 54.18666193                                      | 1.01720534                                                          | 0.031029823 | 1           | MANSC1         | 12          |      |
| 12326056                                         | 12350541                                                            | -           | 6015        | protein_coding |             |      |
|                                                  | MANSC domain containing 1 [Source:HGNC Symbol;Acc:HGNC:25505]       |             |             |                |             |      |
| -                                                | 120                                                                 | 111         | 126         | 61             | 36          | 56   |
| 0.964599052                                      | 0.80416644                                                          | 0.97786961  | 0.563515994 |                |             |      |
| 0.36788682                                       | 0.432895841                                                         |             |             |                |             |      |
| ENSG00000071539                                  | 836.8146599                                                         | 919.6802723 | 685.7075012 |                |             |      |
| 1215.582278                                      | 1098.17394                                                          | 923.1735127 | 814.0674778 |                |             |      |

|                                             |              |                                     |             |                |         |             |
|---------------------------------------------|--------------|-------------------------------------|-------------|----------------|---------|-------------|
| 1078.976577                                 | -0.405793831 | 0.031050464                         | 1           | TRIP13         | 5       |             |
| 892643                                      | 919357       | +                                   | 3560        | protein_coding | thyroid |             |
| hormone receptor interactor 13              |              | [Source:HGNC Symbol;Acc:HGNC:12307] |             |                |         |             |
| -                                           | 870          | 1057                                | 737         | 1103           | 906     | 1000        |
| 11.8159997                                  | 12.93848978  | 9.664146964                         | 17.21621026 |                |         |             |
| 15.64319863                                 | 13.06113806  |                                     |             |                |         |             |
| ENSG00000174444                             | 35462.66632  | 41654.46864                         | 40986.14226 |                |         |             |
| 44706.53736                                 | 46942.69353  | 45861.41377                         | 39367.75907 |                |         |             |
| 45836.88155                                 | -0.219479953 | 0.03108027                          | 0.214261239 |                |         | RPL4        |
| 15                                          | 66498015     | 66524532                            | -           |                | 5637    |             |
| protein_coding ribosomal protein L4         |              | [Source:HGNC                        |             |                |         |             |
| Symbol;Acc:HGNC:10353]                      | -            | 36869                               | 47874       | 44052          | 40566   | 38728       |
| 49678                                       | 316.2383534  | 370.0924951                         | 364.8073935 |                |         |             |
| 399.8767881                                 | 422.3032221  | 409.7765356                         |             |                |         |             |
| ENSG00000251414                             | 32.70310165  | 39.15384319                         | 8.373632987 |                |         |             |
| 5.510345777                                 | 0            | 6.462214589                         | 26.74352594 | 3.990853455    |         |             |
| 2.724270878                                 | 0.031141327  | 1                                   | AC138956.2  | 5              |         |             |
| 176354206                                   | 176356168    | +                                   | 528         | antisense      |         |             |
| novel transcript                            |              | -                                   | 34          | 45             | 9       | 5           |
| 0                                           | 7            | 3.113480937                         | 3.713959718 | 0.795709646    |         |             |
| 0.526196706                                 | 0            | 0.616446137                         |             |                |         |             |
| ENSG00000119684                             | 650.2146093  | 750.8837039                         | 548.9381625 |                |         |             |
| 434.2152472                                 | 494.5419067  | 492.9746558                         | 650.0121585 |                |         |             |
| 473.9106032                                 | 0.455991094  | 0.031183181                         | 1           | MLH3           | 14      |             |
| 75013764                                    | 75051532     | -                                   | 8363        | protein_coding |         |             |
| mutL homolog 3                              |              | [Source:HGNC Symbol;Acc:HGNC:7128]  |             |                |         |             |
| 676                                         | 863          | 590                                 | 394         | 408            | 534     | 3.908281309 |
| 4.496838563                                 | 3.293335311  | 2.617858501                         | 2.998785668 |                |         |             |
| 2.968999869                                 |              |                                     |             |                |         |             |
| ENSG00000176731                             | 336.6495758  | 314.9709163                         | 313.5460352 |                |         |             |
| 487.1145667                                 | 424.2393807  | 443.1232861                         | 321.7221758 |                |         |             |
| 451.4924112                                 | -0.489088913 | 0.031200877                         | 1           | C8orf59        | 8       |             |
| 85214076                                    | 85220421     | -                                   | 2514        | protein_coding |         |             |
| chromosome 8 open reading frame 59          |              | [Source:HGNC                        |             |                |         |             |
| Symbol;Acc:HGNC:32235]                      | -            | 350                                 | 362         | 337            | 442     | 350         |
| 480                                         | 6.731378131  | 6.274828998                         | 6.257641277 |                |         |             |
| 9.769425821                                 | 8.557563515  | 8.877833222                         |             |                |         |             |
| ENSG00000143819                             | 375.1238131  | 350.6444179                         | 405.655998  |                |         |             |
| 582.9945832                                 | 507.8751443  | 479.1270531                         | 377.1414097 |                |         |             |
| 523.3322602                                 | -0.472451258 | 0.031226413                         | 1           | EPHX1          | 1       |             |
| 225810092                                   | 225845563    | +                                   | 2508        | protein_coding |         |             |
| epoxide hydrolase 1                         |              | [Source:HGNC Symbol;Acc:HGNC:3401]  |             |                |         |             |
| 390                                         | 403          | 436                                 | 529         | 419            | 519     | 7.518622696 |
| 7.002225807                                 | 8.115307733  | 11.72033927                         | 10.26913471 |                |         |             |
| 9.622121662                                 |              |                                     |             |                |         |             |
| ENSG00000119979                             | 398.2083554  | 555.9845733                         | 366.5790441 |                |         |             |
| 338.3352307                                 | 319.9977043  | 204.0213463                         | 440.2573243 |                |         |             |
| 287.4514271                                 | 0.617187256  | 0.031281635                         | 1           | FAM45A         | 10      |             |
| 119104086                                   | 119137984    | +                                   | 6291        | protein_coding |         |             |
| family with sequence similarity 45 member A |              | [Source:HGNC                        |             |                |         |             |



|                                                          |                                                       |             |             |                |             |      |
|----------------------------------------------------------|-------------------------------------------------------|-------------|-------------|----------------|-------------|------|
| Symbol;Acc:HGNC:31793]                                   | -                                                     | 414         | 639         | 394            | 307         | 264  |
| 221                                                      | 3.181865901                                           | 4.426289045 | 2.923631096 |                |             |      |
| 2.711631897                                              | 2.579476656                                           | 1.63344158  |             |                |             |      |
| ENSG00000163682                                          | 6837.833813                                           | 9109.794182 | 10353.53199 |                |             |      |
| 9637.594764                                              | 11718.70381                                           | 11394.73067 | 8767.053327 |                |             |      |
| 10917.00975                                              | -0.31638058                                           | 0.031316551 | 0.214261239 |                |             | RPL9 |
| 4                                                        | 39452521                                              | 39458949    | -           |                | 5022        |      |
| protein_coding                                           | ribosomal protein L9 [Source:HGNC                     |             |             |                |             |      |
| Symbol;Acc:HGNC:10369]                                   | -                                                     | 7109        | 10470       | 11128          | 8745        | 9668 |
| 12343                                                    | 68.44362803                                           | 90.85076133 | 103.4395076 |                |             |      |
| 96.75984168                                              | 118.3333865                                           | 114.2812649 |             |                |             |      |
| ENSG00000047410                                          | 4660.191985                                           | 4006.743287 | 4752.501922 |                |             |      |
| 4338.846265                                              | 3436.338984                                           | 2927.383209 | 4473.145731 |                |             |      |
| 3567.522819                                              | 0.326545602                                           | 0.031339325 | 0.214261239 |                |             | TPR  |
| 1                                                        | 186311652                                             | 186375693   | -           |                | 12350       |      |
| protein_coding                                           | "translocated promoter region, nuclear basket protein |             |             |                |             |      |
| [Source:HGNC                                             | Symbol;Acc:HGNC:12017]"                               |             |             |                |             |      |
| 3937                                                     | 2835                                                  | 3171        | 18.96828386 | 16.24879931    |             | 5108 |
| 19.30767442                                              | 17.71374958                                           | 14.11020963 | 11.93878971 |                |             |      |
| ENSG00000055130                                          | 1106.134321                                           | 1064.114449 | 1096.945921 |                |             |      |
| 1437.098179                                              | 1381.808269                                           | 1262.901365 | 1089.064897 |                |             |      |
| 1360.602604                                              | -0.320884246                                          | 0.031385372 | 1           | CUL1           | 7           |      |
| 148697914                                                | 148801036                                             | +           | 3548        | protein_coding |             | 1150 |
| cullin 1 [Source:HGNC                                    | Symbol;Acc:HGNC:2551]                                 |             |             |                |             |      |
| 1223                                                     | 1179                                                  | 1304        | 1140        | 1368           | 15.67167605 |      |
| 15.02108984                                              | 15.51230124                                           | 20.42236453 | 19.75006823 |                |             |      |
| 17.92806856                                              |                                                       |             |             |                |             |      |
| ENSG00000090006                                          | 2493.130573                                           | 2085.594714 | 2455.335272 |                |             |      |
| 1860.292734                                              | 2018.16734                                            | 1862.040975 | 2344.686853 |                |             |      |
| 1913.50035                                               | 0.293249285                                           | 0.031386212 | 1           | LTBP4          | 19          |      |
| 40592883                                                 | 40629818                                              | +           | 8108        | protein_coding |             |      |
| latent transforming growth factor beta                   | binding protein 4                                     |             |             |                |             |      |
| [Source:HGNC                                             | Symbol;Acc:HGNC:6717]                                 |             |             |                |             |      |
| 1688                                                     | 1665                                                  | 2017        | 15.45690272 | 12.88287793    |             | 2639 |
| 15.19398475                                              | 11.56833205                                           | 12.62257204 | 11.56706501 |                |             |      |
| ENSG00000242372                                          | 4934.320926                                           | 4463.538124 | 5898.759237 |                |             |      |
| 5206.17469                                               | 6535.710688                                           | 7353.077029 | 5098.872762 |                |             |      |
| 6364.987469                                              | -0.320135726                                          | 0.031392306 | 0.214261239 |                |             | EIF6 |
| 20                                                       | 35278911                                              | 35284985    | -           |                | 1631        |      |
| protein_coding                                           | eukaryotic translation initiation factor 6            |             |             |                |             |      |
| [Source:HGNC                                             | Symbol;Acc:HGNC:6159]                                 |             |             |                |             |      |
| 4724                                                     | 5392                                                  | 7965        | 152.0773795 | 137.0635581    |             | 6340 |
| 181.4601781                                              | 160.9414729                                           | 203.209161  | 227.0716089 |                |             |      |
| ENSG00000063169                                          | 589.6176857                                           | 548.1538047 | 694.0811342 |                |             |      |
| 498.1352582                                              | 359.9974173                                           | 455.1245418 | 610.6175415 |                |             |      |
| 437.7524058                                              | 0.479237591                                           | 0.031526268 | 1           | BICRA          | 19          |      |
| 47608196                                                 | 47703277                                              | +           | 7507        | protein_coding |             |      |
| BRD4 interacting chromatin remodeling complex associated |                                                       |             |             |                |             |      |
| protein [Source:HGNC                                     | Symbol;Acc:HGNC:4332]                                 |             |             |                |             |      |
| 746                                                      | 452                                                   | 297         | 493         | 3.948164827    | 3.657065437 |      |

|                                    |                                                                |                      |             |                       |                |           |
|------------------------------------|----------------------------------------------------------------|----------------------|-------------|-----------------------|----------------|-----------|
|                                    | 4.638936711                                                    | 3.345677399          | 2.431853416 | 3.053595603           |                |           |
| ENSG00000197785                    | 2658.569793                                                    |                      | 2096.035739 | 2543.723621           |                |           |
| 2211.852795                        | 3378.157583                                                    |                      | 4105.352611 | 2432.776384           |                |           |
| 3231.787663                        | -0.410060586                                                   |                      | 0.031565216 | 0.214643467           | ATAD3A         |           |
| 1                                  | 1512151                                                        | 1534687              | +           | 3069                  |                |           |
| protein_coding                     | "ATPase family, AAA domain containing 3A [Source:HGNC          |                      |             |                       |                |           |
| Symbol;Acc:HGNC:25567]"            | -                                                              |                      | 2764        | 2409                  | 2734           | 2007 2787 |
| 4447                               | 43.54540827                                                    |                      | 34.20570212 | 41.58604868           |                |           |
| 36.3381261                         | 55.8196926                                                     |                      | 67.37538489 |                       |                |           |
| ENSG00000225871                    | 25.0082542                                                     |                      | 5.220512425 | 0                     | 0              | 0         |
| 0                                  | 10.07625554                                                    |                      | 0           | 5.673841152           | 0.031586275    |           |
| 1                                  | AC245100.2                                                     |                      | 1           | 148435105             | 148436926      |           |
| +                                  | 1679                                                           | processed_pseudogene |             | "family with sequence |                |           |
| similarity 91, member A1 (FAM91A1) | pseudogene"                                                    | -                    |             | 26                    | 6              |           |
| 0                                  | 0                                                              | 0                    | 0           | 0.748727644           | 0.155725291    |           |
| 0                                  | 0                                                              | 0                    | 0           |                       |                |           |
| ENSG00000134780                    | 512.6692112                                                    |                      | 486.377741  | 380.5350991           |                |           |
| 219.3117619                        | 370.90643                                                      |                      | 330.4961176 | 459.8606837           |                |           |
| 306.9047698                        | 0.58366095                                                     |                      | 0.031607384 | 1                     | DAGLA          | 11        |
| 61680433                           | 61747001                                                       |                      | +           | 5757                  | protein_coding |           |
|                                    | diacylglycerol lipase alpha [Source:HGNC Symbol;Acc:HGNC:1165] |                      |             |                       |                |           |
| -                                  | 533                                                            | 559                  | 409         | 199                   | 306            | 358       |
| 4.476434107                        | 4.23130349                                                     |                      | 3.316447406 | 1.92074137            |                |           |
| 3.267176203                        | 2.891464172                                                    |                      |             |                       |                |           |
| ENSG00000122435                    | 980.1311936                                                    |                      | 960.5742863 | 975.0630411           |                |           |
| 843.0829039                        | 784.236798                                                     |                      | 503.1295644 | 971.9228403           |                |           |
| 710.1497555                        | 0.454037411                                                    |                      | 0.031627525 | 1                     | TRMT13         | 1         |
| 100133150                          | 100150497                                                      |                      | +           | 4133                  | protein_coding |           |
|                                    | tRNA methyltransferase 13 homolog [Source:HGNC                 |                      |             |                       |                |           |
| Symbol;Acc:HGNC:25502]"            | -                                                              |                      | 1019        | 1104                  | 1048           | 765 647   |
| 545                                | 11.92092609                                                    |                      | 11.64024887 | 11.83700724           |                |           |
| 10.28508946                        | 9.622462684                                                    |                      | 6.131434809 |                       |                |           |
| ENSG00000163872                    | 1292.734371                                                    |                      | 1188.536662 | 1225.341627           |                |           |
| 904.7987766                        | 1092.113377                                                    |                      | 921.3271657 | 1235.537553           |                |           |
| 972.7464398                        | 0.345526315                                                    |                      | 0.031643257 | 1                     | YEATS2         | 3         |
| 183697818                          | 183812625                                                      |                      | +           | 10212                 | protein_coding |           |
|                                    | YEATS domain containing 2 [Source:HGNC Symbol;Acc:HGNC:25489]  |                      |             |                       |                |           |
| -                                  | 1344                                                           | 1366                 | 1317        | 821                   | 901            | 998       |
| 6.363406673                        | 5.829059534                                                    |                      | 6.020339804 | 4.467292556           |                |           |
| 5.42327148                         | 4.544130062                                                    |                      |             |                       |                |           |
| ENSG00000233030                    | 8.656703379                                                    |                      | 6.09059783  | 9.304036652           |                | 0         |
| 0                                  | 0                                                              | 8.01711262           | 0           | 5.344643305           |                |           |
| 0.031758964                        | 1                                                              | AC243772.2           | 1           | 149785659             |                |           |
| 149793020                          | -                                                              | 3543                 | antisense   | "novel transcript,    |                |           |
| antisense to FCGR1A"               | -                                                              | 9                    | 7           | 10                    | 0              | 0         |
| 0                                  | 0.122820984                                                    |                      | 0.086096498 | 0.13175736            | 0              |           |
| 0                                  | 0                                                              |                      |             |                       |                |           |
| ENSG00000227170                    | 25.97011014                                                    |                      | 4.350427021 | 0                     | 0              | 0         |
| 0                                  | 10.10684572                                                    |                      | 0           | 5.678128041           | 0.031856       |           |
| 1                                  | AF178030.1                                                     |                      | 8           | 115509602             | 115511325      |           |

|                                    |                              |                        |              |                        |                     |                |
|------------------------------------|------------------------------|------------------------|--------------|------------------------|---------------------|----------------|
|                                    | +                            | 402                    | antisense    | novel transcript       |                     | -              |
|                                    | 27                           | 5                      | 0            | 0                      | 0                   | 3.247423488    |
|                                    | 0.542004072                  |                        | 0            | 0                      | 0                   |                |
| ENSG00000129214                    | 0                            | 0                      | 0            | 0                      | 14.5453502          |                |
| 12.92442918                        | 0                            | 9.156593125            |              | -5.7578859             | 0.03188742          |                |
| 1                                  | SHBG                         | 17                     | 7613946      | 7633383                | +                   | 1972           |
| protein_coding                     | sex hormone binding globulin |                        |              |                        | [Source:HGNC        |                |
| Symbol;Acc:HGNC:10839]             | -                            | 0                      | 0            | 0                      | 0                   | 12             |
| 14                                 | 0                            | 0                      | 0            | 0                      | 0.374043141         |                |
| 0.330105031                        |                              |                        |              |                        |                     |                |
| ENSG00000176945                    | 46.16908469                  |                        | 51.33503885  |                        | 53.96341258         |                |
| 82.65518666                        | 87.27210117                  |                        | 146.7845885  |                        | 50.48917871         |                |
| 105.5706255                        | -1.066301168                 |                        | 0.031896875  |                        | 1                   | MUC20 3        |
| 195720882                          |                              | 195741123              |              | +                      | 4249                | protein_coding |
| "mucin 20, cell surface associated |                              |                        |              |                        | [Source:HGNC        |                |
| Symbol;Acc:HGNC:23282]"            | -                            | 48                     | 59           | 58                     | 75                  | 72             |
| 159                                | 0.546205065                  |                        | 0.605095437  |                        | 0.637216919         |                |
| 0.980813819                        | 1.041581183                  |                        | 1.739968602  |                        |                     |                |
| ENSG00000273056                    | 0                            | 0                      | 0            | 14.32689902            |                     | 13.33323768    |
| 0                                  | 0                            | 9.220045567            |              | -5.764929452           |                     | 0.031907744    |
| 1                                  | AL354694.1                   | 9                      | 7786105      | 7786688                | -                   | 584            |
| lincRNA                            | novel transcript             |                        |              | -                      | 0                   | 0              |
| 13                                 | 11                           | 0                      | 0            | 0                      | 0                   | 1.236922669    |
| 1.157783079                        | 0                            |                        |              |                        |                     |                |
| ENSG00000248309                    | 12.5041271                   |                        | 3.480341617  |                        | 8.373632987         | 0              |
| 0                                  | 0                            | 8.119367235            | 0            |                        | 5.362360224         |                |
| 0.031931234                        | 1                            | MEF2C-AS1              | 5            |                        | 88883328            |                |
| 89466398                           | +                            | 7865                   | antisense    |                        | MEF2C antisense RNA | 1              |
| [Source:HGNC                       | Symbol;Acc:HGNC:48908]       | -                      |              | 13                     | 4                   | 9              |
| 0                                  | 0                            | 0                      | 0.079918227  |                        | 0.022162557         |                |
| 0.05341827                         | 0                            | 0                      | 0            |                        |                     |                |
| ENSG00000236778                    | 40.3979491                   |                        | 65.25640532  |                        | 38.14655027         |                |
| 23.14345226                        | 0                            | 0                      | 47.9336349   |                        | 7.714484088         |                |
| 2.639641939                        | 0.031946594                  |                        | 1            | INTS6-AS1              | 13                  |                |
| 51452367                           | 51552364                     |                        | +            | 9866                   | antisense           | INTS6          |
| antisense RNA 1                    | [Source:HGNC                 | Symbol;Acc:HGNC:42691] | -            |                        |                     | 42             |
| 75                                 | 41                           | 21                     | 0            | 0                      | 0.205830342         |                |
| 0.331267439                        | 0.193994216                  |                        | 0.118274257  |                        | 0                   | 0              |
| ENSG00000165283                    | 3802.216495                  |                        | 3812.714241  |                        | 3631.365505         |                |
| 4065.533114                        | 4815.723027                  |                        | 4514.318477  |                        | 3748.765414         |                |
| 4465.19154                         | -0.252227379                 |                        | 0.031955789  |                        | 0.216497521         | STOML2         |
| 9                                  | 35099776                     |                        | 35103195     |                        | -                   | 1806           |
| protein_coding                     | stomatin like 2              |                        | [Source:HGNC | Symbol;Acc:HGNC:14559] |                     |                |
| -                                  | 3953                         | 4382                   | 3903         | 3689                   | 3973                | 4890           |
| 105.8303628                        | 105.7336501                  |                        | 100.8850564  |                        | 113.5018533         |                |
| 135.2222566                        | 125.8989567                  |                        |              |                        |                     |                |
| ENSG00000158555                    | 474.194974                   |                        | 390.6683465  |                        | 556.3813918         |                |
| 556.5449235                        | 661.8134339                  |                        | 767.1571891  |                        | 473.7482374         |                |
| 661.8385155                        | -0.483222663                 |                        | 0.032047489  |                        | 1                   | GDPD5 11       |
| 75434640                           | 75525903                     |                        | -            |                        | 9867                | protein_coding |

|                                     |                                                             |                      |                                   |                 |                         |             |
|-------------------------------------|-------------------------------------------------------------|----------------------|-----------------------------------|-----------------|-------------------------|-------------|
|                                     | glycerophosphodiester phosphodiesterase domain containing 5 |                      |                                   |                 |                         |             |
| [Source:HGNC Symbol;Acc:HGNC:28804] | -                                                           | 493                  | 449                               | 598             |                         |             |
| 505                                 | 546                                                         | 831                  | 2.415811296                       | 1.982986742     |                         |             |
| 2.829189852                         | 2.843926012                                                 |                      | 3.401377815                       | 3.916038147     |                         |             |
| ENSG00000277589                     | 0                                                           | 0                    | 37.21614661                       | 0               | 0                       | 0           |
|                                     | 12.4053822                                                  | 0                    | 5.9744852                         | 0.032065609     |                         | 1           |
|                                     | AC244093.4                                                  | 17                   | 36998598                          | 37000034        |                         | +           |
|                                     | 710                                                         | sense_intronic       | "novel transcript, sense intronic |                 |                         |             |
| AATF"                               | -                                                           | 0                    | 0                                 | 40              | 0                       | 0           |
|                                     | 0                                                           | 2.62995113           | 0                                 | 0               | 0                       | 0           |
| ENSG00000284693                     | 54.82578806                                                 |                      | 13.92136647                       | 12.09524765     |                         | 0           |
|                                     | 1.212112516                                                 | 9.231735127          | 26.94746739                       | 3.481282548     |                         |             |
|                                     | 2.917727388                                                 | 0.032096589          | 1                                 | AL928921.2      |                         | 1           |
|                                     | 9425094                                                     | 9440564              | -                                 | 2623            | lincRNA uncharacterized |             |
| LOC100506022                        | [Source:NCBI gene;Acc:100506022]                            |                      |                                   |                 |                         |             |
|                                     | -                                                           | 57                   | 16                                |                 |                         |             |
|                                     | 13                                                          | 0                    | 1                                 | 10              | 1.0506977               | 0.265815493 |
|                                     | 0.231361503                                                 | 0                    | 0.023434143                       | 0.177268973     |                         |             |
| ENSG00000254732                     | 8.656703379                                                 |                      | 7.830768638                       | 7.443229322     |                         | 0           |
|                                     | 0                                                           | 0                    | 7.976900446                       | 0               | 5.337614202             |             |
| 0.032099813                         | 1                                                           | AP001931.1           | 11                                | 57742163        |                         |             |
| 57793243                            | +                                                           | 580                  | protein_coding                    | "novel protein, |                         |             |
| C11orf31-CTNND1                     | readthrough"                                                |                      |                                   |                 |                         |             |
|                                     | -                                                           | 9                    | 9                                 | 8               |                         | 0           |
|                                     | 0                                                           | 0                    | 0.750266806                       | 0.676196804     | 0.643884587             |             |
|                                     | 0                                                           | 0                    | 0                                 |                 |                         |             |
| ENSG00000171735                     | 321.2598809                                                 |                      | 383.7076633                       | 385.1871174     |                         |             |
| 490.4207742                         | 504.2388068                                                 |                      | 516.0539936                       | 363.3848872     |                         |             |
| 503.5711915                         | -0.470551367                                                |                      | 0.032109133                       | 1               | CAMTA1                  | 1           |
|                                     | 6785324                                                     | 7769706              | +                                 | 10033           | protein_coding          | calmodulin  |
| binding transcription activator     | 1 [Source:HGNC Symbol;Acc:HGNC:18806]                       |                      |                                   |                 |                         |             |
|                                     | CG-1                                                        | 334                  | 441                               | 414             | 445                     | 416         |
|                                     | 559                                                         |                      |                                   |                 |                         |             |
| 1.609595952                         | 1.915430396                                                 |                      | 1.92626292                        | 2.46457048      |                         |             |
| 2.54864812                          | 2.590669509                                                 |                      |                                   |                 |                         |             |
| ENSG00000117280                     | 1666.896328                                                 |                      | 1716.678503                       | 1485.854653     |                         |             |
| 1330.197471                         | 1323.626868                                                 |                      | 1284.134356                       | 1623.143161     |                         |             |
| 1312.652898                         | 0.306477034                                                 |                      | 0.032110901                       | 1               | RAB29                   | 1           |
|                                     | 205767986                                                   | 205775460            | -                                 | 3882            | protein_coding          |             |
|                                     | "RAB29, member RAS oncogene family [Source:HGNC             |                      |                                   |                 |                         |             |
| Symbol;Acc:HGNC:9789]"              | -                                                           | 1733                 | 1973                              | 1597            | 1207                    | 1092        |
|                                     | 1391                                                        | 21.58461209          | 22.1477775                        | 19.20416465     |                         |             |
| 17.27681897                         | 17.29077532                                                 |                      | 16.66105957                       |                 |                         |             |
| ENSG00000214264                     | 0                                                           | 0                    | 0                                 | 0               | 4.848450065             |             |
| 23.07933782                         | 0                                                           | 9.309262628          | -5.785414721                      | 0.032240991     |                         |             |
|                                     | 1                                                           | KCTD9P4              | 11                                | 112180773       | 112183191               | +           |
|                                     | 1166                                                        | processed_pseudogene | potassium channel                 |                 |                         |             |
| tetramerization domain containing   | 9 pseudogene 4 [Source:HGNC                                 |                      |                                   |                 |                         |             |
| Symbol;Acc:HGNC:49913]              | -                                                           | 0                    | 0                                 | 0               | 0                       | 4           |
|                                     | 25                                                          | 0                    | 0                                 | 0               | 0.210867088             |             |
| 0.996947931                         |                                                             |                      |                                   |                 |                         |             |
| ENSG00000127603                     | 9038.560183                                                 |                      | 7023.329383                       | 8761.611315     |                         |             |
| 8117.841399                         | 5675.110801                                                 |                      | 6095.714705                       | 8274.500294     |                         |             |

|                                                             |                                                      |             |                      |                |
|-------------------------------------------------------------|------------------------------------------------------|-------------|----------------------|----------------|
| 6629.555635                                                 | 0.319709997                                          | 0.032259158 | 0.216792031          | MACF1          |
| 1                                                           | 39081316                                             | 39487177    | + 40739              |                |
| protein_coding                                              | microtubule-actin crosslinking factor 1 [Source:HGNC |             |                      |                |
| Symbol;Acc:HGNC:13664]                                      | -                                                    | 9397 8072   | 9417 7366            | 4682           |
| 6603                                                        | 11.15270151                                          | 8.63434478  | 10.79066579          |                |
| 10.0469304                                                  | 7.064288142                                          | 7.536365469 |                      |                |
| ENSG00000235128                                             | 10.58041524                                          | 7.830768638 | 5.582421991          | 0              |
| 0                                                           | 0                                                    | 7.997868623 | 0                    | 5.341272506    |
| 0.032267533                                                 | 1                                                    | AC013474.1  | 2                    | 126679622      |
| 126680420                                                   | +                                                    | 799         | processed_pseudogene | novel          |
| pseudogene                                                  | -                                                    | 11          | 9                    | 6              |
| 0.665651818                                                 | 0.490856253                                          | 0.350550432 | 0                    | 0              |
| 0                                                           |                                                      |             |                      |                |
| ENSG00000172354                                             | 4105.201113                                          | 4655.826998 | 5033.483829          |                |
| 4466.686287                                                 | 6403.590424                                          | 6377.282626 | 4598.170647          |                |
| 5749.186445                                                 | -0.322307733                                         | 0.032284193 | 0.216792031          | GNB2           |
| 7                                                           | 100673531                                            | 100679174   | + 2857               |                |
| protein_coding                                              | G protein subunit beta 2 [Source:HGNC                |             |                      |                |
| Symbol;Acc:HGNC:4398]                                       | -                                                    | 4268 5351   | 5410 4053            | 5283           |
| 6908                                                        | 72.22962945                                          | 81.61750384 | 88.39609105          |                |
| 78.82761867                                                 | 113.6626378                                          | 112.4276432 |                      |                |
| ENSG00000247400                                             | 61.55877958                                          | 33.06324536 | 47.45058692          |                |
| 24.24552142                                                 | 0                                                    | 6.462214589 | 47.35753729          | 10.235912      |
| 2.20718773                                                  | 0.03228547                                           | 1           | DNAJC3-DT            | 13             |
| 95648733                                                    | 95676925                                             | -           | 3010                 | lincRNA DNAJC3 |
| divergent transcript [Source:HGNC Symbol;Acc:HGNC:39808]    |                                                      |             |                      | -              |
| 64                                                          | 38                                                   | 51          | 22                   | 0              |
| 0.550143136                                                 | 0.790951249                                          | 0.406132953 | 0                    | 1.028051083    |
| 0.108134073                                                 |                                                      |             |                      |                |
| ENSG00000075826                                             | 129.8505507                                          | 74.82734476 | 160.9598341          |                |
| 61.7158727                                                  | 26.66647536                                          | 75.70022804 | 121.8792432          |                |
| 54.69419204                                                 | 1.150389039                                          | 0.032343401 | 1                    | SEC31B 10      |
| 100486642                                                   | 100519864                                            | -           | 7938                 | protein_coding |
| "SEC31 homolog B, COPII coat complex component [Source:HGNC |                                                      |             |                      |                |
| Symbol;Acc:HGNC:23197]"                                     | -                                                    | 135 86      | 173 56               | 22             |
| 82                                                          | 0.822287883                                          | 0.472112995 | 1.01737496           |                |
| 0.392002626                                                 | 0.170356593                                          | 0.480323434 |                      |                |
| ENSG00000168610                                             | 2880.758513                                          | 3017.456182 | 2709.335473          |                |
| 2387.081791                                                 | 2326.043919                                          | 2469.489147 | 2869.183389          |                |
| 2394.204952                                                 | 0.260977248                                          | 0.032353495 | 0.216792031          | STAT3          |
| 17                                                          | 42313324                                             | 42388568    | -                    | 8812           |
| protein_coding                                              | signal transducer and activator of transcription 3   |             |                      |                |
| [Source:HGNC Symbol;Acc:HGNC:11364]                         | STAT                                                 | 2995        | 3468                 | 2912           |
| 2166                                                        | 1919                                                 | 2675        | 16.4332535           | 17.14996342    |
| 15.42634067                                                 | 13.65827987                                          | 13.38590833 | 14.11498159          |                |
| ENSG00000187957                                             | 605.9692365                                          | 628.2016619 | 704.3155745          |                |
| 458.4607687                                                 | 472.7238814                                          | 513.2844731 | 646.1621576          |                |
| 481.4897077                                                 | 0.423914767                                          | 0.032428725 | 1                    | DNER 2         |
| 229357629                                                   | 229714558                                            | -           | 3935                 | protein_coding |
| delta/notch like EGF repeat containing [Source:HGNC         |                                                      |             |                      |                |

|                                                                     |                        |                                |              |                      |                |             |
|---------------------------------------------------------------------|------------------------|--------------------------------|--------------|----------------------|----------------|-------------|
| Symbol;Acc:HGNC:24456]                                              | -                      | 630                            | 722          | 757                  | 416            | 390         |
| 556                                                                 | 7.740999319            | 7.995599987                    | 8.980430964  |                      |                |             |
| 5.874361077                                                         | 6.092102904            | 6.569935002                    |              |                      |                |             |
| ENSG00000254503                                                     | 0                      | 0                              | 2.791210996  | 0                    | 36.36337549    |             |
|                                                                     | 16.61712323            | 0.930403665                    | 17.66016624  |                      | -4.249763559   |             |
|                                                                     | 0.03251119             | 1                              | AC010319.1   | 19                   | 17417031       |             |
|                                                                     | 17418288               | -                              | 1258         | processed_pseudogene | high-          |             |
| mobility group box 3 (HMGB3) pseudogene                             | -                      | 0                              | 0            | 0                    | 3              |             |
|                                                                     | 0                      | 30                             | 18           | 0                    | 0              | 0           |
|                                                                     | 1.465844743            | 0.665308209                    |              |                      | 0.111323448    |             |
| ENSG00000275981                                                     | 12.5041271             | 2.610256213                    |              | 9.304036652          | 0              |             |
|                                                                     | 0                      | 0                              | 8.139473322  | 0                    | 5.365834306    |             |
| 0.032575656                                                         | 1                      | AC018816.2                     | 3            | 4750333              | 4750685        | +           |
|                                                                     | 353                    | misc_RNA                       | -            | 13                   | 3              | 10          |
|                                                                     | 0                      | 0                              | 1.780614327  | 0.370343859          |                |             |
| 1.322425851                                                         | 0                      | 0                              | 0            |                      |                |             |
| ENSG00000130560                                                     | 1276.38282             | 1285.116142                    |              | 1280.235443          |                |             |
| 1272.889875                                                         | 1729.684561            | 1981.130358                    |              | 1280.578135          |                |             |
| 1661.234931                                                         | -0.375846049           | 0.032682161                    |              | 1                    | UBAC1          | 9           |
|                                                                     | 135932969              | 135961380                      | -            | 2979                 | protein_coding |             |
| UBA domain containing 1 [Source:HGNC                                | Symbol;Acc:HGNC:30221] |                                |              |                      |                |             |
| -                                                                   | 1327                   | 1477                           | 1376         | 1155                 | 1427           | 2146        |
| 21.5378147                                                          | 21.60571235            | 21.56224451                    |              | 21.54386032          |                |             |
| 29.44427262                                                         | 33.49579057            |                                |              |                      |                |             |
| ENSG00000155657                                                     | 770.4466007            | 386.3179195                    |              | 646.6305473          |                |             |
| 427.6028323                                                         | 340.6036171            | 440.3537656                    |              | 601.1316892          |                |             |
| 402.853405                                                          | 0.57620101             | 0.032789398                    |              | 1                    | TTN            | 2           |
|                                                                     | 178525989              | 178830802                      | -            | 118976               | protein_coding |             |
| titin [Source:HGNC                                                  | Symbol;Acc:HGNC:12403] |                                |              |                      |                | 801         |
|                                                                     | 444                    | 695                            | 388          | 281                  | 477            | 0.325517521 |
| 0.162623088                                                         | 0.272691422            | 0.181210937                    |              | 0.14517583           |                |             |
| 0.18641894                                                          |                        |                                |              |                      |                |             |
| ENSG00000080644                                                     | 6.732991517            | 6.09059783                     |              | 9.304036652          |                |             |
| 52.89931946                                                         | 15.75746271            | 25.84885836                    |              | 7.375875333          |                |             |
| 31.50188018                                                         | -2.095768669           | 0.032789485                    |              | 1                    | CHRNA3         | 15          |
|                                                                     | 78593052               | 78621295                       | -            | 4765                 | protein_coding |             |
| cholinergic receptor nicotinic alpha 3 subunit [Source:HGNC         |                        |                                |              |                      |                |             |
| Symbol;Acc:HGNC:1957]                                               | -                      | 7                              | 7            | 10                   | 48             | 13          |
|                                                                     | 28                     | 0.071029106                    | 0.064016766  | 0.097967749          |                |             |
| 0.559745197                                                         | 0.167697971            | 0.273228592                    |              |                      |                |             |
| ENSG00000259950                                                     | 0                      | 0                              | 0            | 34.16414382          | 0              | 0           |
|                                                                     | 0                      | 11.38804794                    | -6.071796448 | 0.03279706           | 1              |             |
| AC034105.3                                                          | 16                     | 31894542                       |              | 31894983             | -              |             |
| 442                                                                 | processed_pseudogene   | "protein tyrosine phosphatase, |              |                      |                |             |
| receptor type, f polypeptide (PTPRF), interacting protein (liprin), |                        |                                |              |                      |                |             |
| alpha 1 (PPFIA1) pseudogene"                                        | -                      | 0                              | 0            | 0                    | 31             |             |
|                                                                     | 0                      | 0                              | 0            | 0                    | 3.897189001    | 0           |
| 0                                                                   |                        |                                |              |                      |                |             |
| ENSG00000273033                                                     | 523.2496264            | 356.7350157                    |              | 396.3519614          |                |             |
| 296.4566028                                                         | 209.6954653            | 336.9583321                    |              | 425.4455345          |                |             |

|                                                                    |                                                    |             |                      |                  |          |             |
|--------------------------------------------------------------------|----------------------------------------------------|-------------|----------------------|------------------|----------|-------------|
| 281.0368001                                                        | 0.595965582                                        | 0.03283967  | 1                    | LINC02035        |          |             |
| 3                                                                  | 122886941                                          | 122892416   | +                    | 5476             |          |             |
| lincRNA long intergenic non-protein coding RNA 2035 [Source:HGNC   |                                                    |             |                      |                  |          |             |
| Symbol;Acc:HGNC:52875]                                             | -                                                  | 544         | 410                  | 426              | 269      | 173         |
| 365                                                                | 4.803266427                                        | 3.262714064 | 3.6315514            |                  |          |             |
| 2.729611783                                                        | 1.941914139                                        | 3.099277355 |                      |                  |          |             |
| ENSG00000254859                                                    | 15.3896949                                         | 2.610256213 | 6.512825656          | 0                |          |             |
| 0                                                                  | 0                                                  | 8.170925588 | 0                    | 5.371230022      |          |             |
| 0.032882711                                                        | 1                                                  | AC067930.4  | 8                    | 143541973        |          |             |
| 143549729                                                          | -                                                  | 498         | antisense            | novel transcript |          |             |
| -                                                                  | 16                                                 | 3           | 7                    | 0                | 0        |             |
| 1.553430602                                                        | 0.262512815                                        | 0.656167526 | 0                    | 0                | 0        |             |
| ENSG00000122034                                                    | 3534.820546                                        | 4376.529583 | 3559.724423          |                  |          |             |
| 4303.580052                                                        | 4848.450065                                        | 4722.032518 | 3823.691518          |                  |          |             |
| 4624.687545                                                        | -0.274259312                                       | 0.032921507 | 0.219795949          | GTF3A            |          |             |
| 13                                                                 | 27424544                                           | 27435823    | +                    | 3001             |          |             |
| protein_coding general transcription factor IIIA [Source:HGNC      |                                                    |             |                      |                  |          |             |
| Symbol;Acc:HGNC:4662]                                              | zf-C2H2                                            | 3675        | 5030                 | 3826             | 3905     | 4000        |
| 5115                                                               | 59.20965962                                        | 73.03997021 | 59.51480378          |                  |          |             |
| 72.30479289                                                        | 81.92969839                                        | 79.25207845 |                      |                  |          |             |
| ENSG00000124103                                                    | 0                                                  | 0           | 0                    | 13.33323768      |          |             |
| 13.84760269                                                        | 0                                                  | 9.060280123 | -5.743048964         | 0.032939426      |          |             |
| 1                                                                  | FAM209A                                            | 20          | 56517187             | 56526142         |          | +           |
| 1137                                                               | protein_coding family with sequence similarity 209 |             |                      |                  |          |             |
| member A [Source:HGNC Symbol;Acc:HGNC:16100]                       |                                                    |             |                      |                  |          |             |
| 0                                                                  | 0                                                  | 11          | 15                   | 0                | 0        | 0           |
| 0.594674862                                                        | 0.613425482                                        |             |                      |                  |          |             |
| ENSG00000234832                                                    | 0                                                  | 0           | 0                    | 20.93931395      | 0        |             |
| 6.462214589                                                        | 0                                                  | 9.133842847 | -5.754877759         | 0.032990227      |          |             |
| 1                                                                  | AL096677.1                                         | 20          | 23346941             | 23351486         |          |             |
| -                                                                  | 814                                                | antisense   | novel transcript     |                  |          | -           |
| 0                                                                  | 0                                                  | 0           | 19                   | 0                | 7        | 0           |
| 0                                                                  | 1.297003774                                        | 0           | 0.399856954          |                  |          |             |
| ENSG00000272752                                                    | 22.12268641                                        | 0           | 7.443229322          | 0                | 0        |             |
| 0                                                                  | 9.855305244                                        | 0           | 5.641555312          | 0.032995429      |          |             |
| 1                                                                  | STAG3L5P-PVRIG2P-PILRB                             | 7           | 100336104            |                  |          |             |
| 100367831                                                          | +                                                  | 3816        | processed_transcript | STAG3L5P-        |          |             |
| PVRIG2P-PILRB readthrough [Source:HGNC Symbol;Acc:HGNC:48898]      |                                                    |             |                      |                  |          |             |
| 23                                                                 | 0                                                  | 8           | 0                    | 0                | 0        | 0.291420894 |
| 0                                                                  | 0.097865058                                        | 0           | 0                    | 0                |          |             |
| ENSG00000160953                                                    | 1482.21999                                         | 1453.042625 | 1400.257516          |                  |          |             |
| 1082.231911                                                        | 1252.112229                                        | 1152.120544 | 1445.173377          |                  |          |             |
| 1162.154895                                                        | 0.314690884                                        | 0.033104229 | 1                    | MUM1             | 19       |             |
| 1354711                                                            | 1378431                                            | +           | 9876                 | protein_coding   | melanoma |             |
| associated antigen (mutated) 1 [Source:HGNC Symbol;Acc:HGNC:29641] |                                                    |             |                      |                  |          |             |
| -                                                                  | 1541                                               | 1670        | 1505                 | 982              | 1033     | 1248        |
| 7.54436643                                                         | 7.368752803                                        | 7.11379678  | 5.525129354          |                  |          |             |
| 6.429343072                                                        | 5.875766411                                        |             |                      |                  |          |             |
| ENSG00000198431                                                    | 3428.054538                                        | 2593.72459  | 3268.508076          |                  |          |             |
| 2995.423964                                                        | 4804.814015                                        | 4159.819848 | 3096.762401          |                  |          |             |

|                                                         |                                                     |             |                |                |
|---------------------------------------------------------|-----------------------------------------------------|-------------|----------------|----------------|
| 3986.685942                                             | -0.364441828                                        | 0.033219417 | 0.220981339    | TXNRD1         |
| 12                                                      | 104215779                                           | 104350305   | + 6708         |                |
| protein_coding                                          | thioredoxin reductase 1 [Source:HGNC                |             |                |                |
| Symbol;Acc:HGNC:12437]                                  | -                                                   | 3564 2981   | 3513 2718      | 3964           |
| 4506                                                    | 25.68892069                                         | 19.36544673 | 24.44731293    |                |
| 22.51481807                                             | 36.32352201                                         | 31.23411116 |                |                |
| ENSG00000161956                                         | 891.640448                                          | 916.1999307 | 1010.41838     |                |
| 523.4828488                                             | 726.0553973                                         | 831.779335  | 939.4195864    |                |
| 693.772527                                              | 0.436613357                                         | 0.033309425 | 1              | SENP3 17       |
| 7561875                                                 | 7571969 +                                           | 3668        | protein_coding | SUMO specific  |
| peptidase 3 [Source:HGNC Symbol;Acc:HGNC:17862]         | -                                                   |             | 927            | 1053           |
| 1086                                                    | 475 599                                             | 901         | 12.21944901    | 12.51000957    |
| 13.82122491                                             | 7.195754306                                         | 10.03794601 | 11.42158779    |                |
| ENSG00000159167                                         | 3599.264894                                         | 5974.006386 | 4122.61864     |                |
| 3805.444794                                             | 3506.64151                                          | 3391.739486 | 4565.29664     |                |
| 3567.94193                                              | 0.355795191                                         | 0.033352926 | 0.221068491    | STC1           |
| 8                                                       | 23841915                                            | 23854807    | - 4149         |                |
| protein_coding                                          | stanniocalcin 1 [Source:HGNC Symbol;Acc:HGNC:11373] |             |                |                |
| -                                                       | 3742 6866                                           | 4431 3453   | 2893 3674      |                |
| 43.60753769                                             | 72.11389646                                         | 49.8544984  | 46.24504295    |                |
| 42.86001898                                             | 41.17434842                                         |             |                |                |
| ENSG00000272668                                         | 162.5536523                                         | 93.09913825 | 230.740109     |                |
| 66.12414933                                             | 119.9991391                                         | 53.54406374 | 162.1309665    |                |
| 79.88911739                                             | 1.024653676                                         | 0.033354839 | 1              | AL590560.1     |
| 1                                                       | 159854870                                           | 159867685   | + 7134         |                |
| antisense                                               | uncharacterized LOC107985216 [Source:NCBI           |             |                |                |
| gene;Acc:107985216]                                     | -                                                   | 169 107     | 248 60         | 99             |
| 58                                                      | 1.145393769                                         | 0.653595827 | 1.622798553    |                |
| 0.467337024                                             | 0.853000822                                         | 0.378029687 |                |                |
| ENSG00000130414                                         | 875.2888972                                         | 658.654651  | 735.0188955    |                |
| 497.0331891                                             | 643.6317462                                         | 533.5942904 | 756.3208146    |                |
| 558.0864085                                             | 0.438926227                                         | 0.033466347 | 1              | NDUFA10 2      |
| 239892450                                               | 240025402                                           | -           | 9517           | protein_coding |
| NADH:ubiquinone oxidoreductase subunit A10 [Source:HGNC |                                                     |             |                |                |
| Symbol;Acc:HGNC:7684]                                   | -                                                   | 910 757     | 790 451        | 531            |
| 578                                                     | 4.623198489                                         | 3.466206305 | 3.875012054    |                |
| 2.633228314                                             | 3.429586903                                         | 2.823961602 |                |                |
| ENSG00000174977                                         | 146.2021015                                         | 177.4974225 | 137.6997424    |                |
| 158.6979584                                             | 310.3008042                                         | 307.4167797 | 153.7997555    |                |
| 258.8051808                                             | -0.750690982                                        | 0.03349575  | 1              | AC026271.1     |
| 17                                                      | 18650195                                            | 18651542    | + 1348         |                |
| processed_pseudogene                                    | poly(A) binding protein interacting protein 1       |             |                |                |
| (PAIP1) pseudogene                                      | -                                                   | 152 204     | 148 144        | 256            |
| 333                                                     | 5.451988263                                         | 6.594758146 | 5.1252831      |                |
| 5.935873588                                             | 11.67340177                                         | 11.48643765 |                |                |
| ENSG00000123485                                         | 325.1073047                                         | 263.6358775 | 304.2419985    |                |
| 657.9352858                                             | 402.4213554                                         | 318.4948619 | 297.6617269    |                |
| 459.6171677                                             | -0.626311134                                        | 0.033525062 | 1              | HJURP 2        |
| 233833416                                               | 233854566                                           | -           | 3821           | protein_coding |
| Holliday junction recognition protein [Source:HGNC      |                                                     |             |                |                |



|                                                               |                        |                                            |             |                |             |     |
|---------------------------------------------------------------|------------------------|--------------------------------------------|-------------|----------------|-------------|-----|
| Symbol;Acc:HGNC:25444]                                        | -                      | 338                                        | 303         | 327            | 597         | 332 |
| 345                                                           | 4.277016041            | 3.455605755                                | 3.994999698 |                |             |     |
| 8.681791208                                                   | 5.340825717            | 4.198296197                                |             |                |             |     |
| ENSG00000139151                                               | 12.5041271             | 16.53162268                                | 0           | 0              | 0           |     |
| 0                                                             | 9.678583261            | 0                                          | 5.617047229 | 0.033526429    |             |     |
| 1                                                             | PLCZ1 12               | 18683169                                   | 18738100    |                |             |     |
| 3431                                                          | protein_coding         | phospholipase C zeta 1 [Source:HGNC        |             |                |             |     |
| Symbol;Acc:HGNC:19218]                                        | -                      | 13                                         | 19          | 0              | 0           | 0   |
| 0                                                             | 0.183199317            | 0.24131898                                 | 0           | 0              | 0           |     |
| 0                                                             |                        |                                            |             |                |             |     |
| ENSG00000169918                                               | 0                      | 8.700854042                                | 20.46888063 | 0              | 0           |     |
| 0                                                             | 9.723244892            | 0                                          | 5.62358298  | 0.033543983    |             |     |
| 1                                                             | OTUD7A 15              | 31475398                                   | 31870789    |                |             |     |
| 14331                                                         | protein_coding         | OTU deubiquitinase 7A [Source:HGNC         |             |                |             |     |
| Symbol;Acc:HGNC:20718]                                        | -                      | 0                                          | 10          | 22             | 0           | 0   |
| 0                                                             | 0                      | 0.030407597                                | 0.071662544 | 0              | 0           |     |
| 0                                                             |                        |                                            |             |                |             |     |
| ENSG00000103723                                               | 0                      | 9.570939447                                | 19.53847697 | 0              | 0           |     |
| 0                                                             | 9.703138805            | 0                                          | 5.620664667 | 0.033548501    |             |     |
| 1                                                             | AP3B2 15               | 82659281                                   | 82709914    |                |             |     |
| 9108                                                          | protein_coding         | adaptor related protein complex 3          |             |                |             |     |
| subunit beta 2 [Source:HGNC                                   | Symbol;Acc:HGNC:567]   | -                                          |             |                |             | 0   |
| 11                                                            | 21                     | 0                                          | 0           | 0              | 0.052629381 |     |
| 0.107632223                                                   | 0                      | 0                                          | 0           |                |             |     |
| ENSG00000238061                                               | 0                      | 10.44102485                                | 18.6080733  | 0              | 0           |     |
| 0                                                             | 9.683032718            | 0                                          | 5.617740593 | 0.033594849    |             |     |
| 1                                                             | AL356273.2             | 1                                          | 185280844   | 185281816      |             |     |
| +                                                             | 973                    | processed_pseudogene "proteasome (prosome, |             |                |             |     |
| macropain) 26S subunit, non-ATPase, 7 (Mov34 homolog) (PSMD7) |                        |                                            |             |                |             |     |
| pseudogene"                                                   | -                      | 0                                          | 12          | 20             | 0           | 0   |
| 0                                                             | 0.537436309            | 0.959540238                                | 0           | 0              | 0           |     |
| ENSG00000258388                                               | 20.19897455            | 24.36239132                                | 14.88645864 | 0              |             |     |
| 6.060562582                                                   | 0                      | 19.8159415                                 | 2.020187527 |                |             |     |
| 3.343000103                                                   | 0.033630929            | 1                                          | PPT2-EGFL8  | 6              |             |     |
| 32153845                                                      | 32171978               | +                                          | 5512        | protein_coding | PPT2-       |     |
| EGFL8 readthrough (NMD candidate) [Source:HGNC                | Symbol;Acc:HGNC:48343] |                                            |             |                |             |     |
| -                                                             | 21                     | 28                                         | 16          | 0              | 5           | 0   |
| 0.184209194                                                   | 0.221364217            | 0.135505465                                | 0           | 0.055758124    |             |     |
| 0                                                             |                        |                                            |             |                |             |     |
| ENSG00000182173                                               | 655.023889             | 860.5144648                                | 826.1984547 |                |             |     |
| 899.2884308                                                   | 1072.719577            | 1104.115521                                | 780.5789362 |                |             |     |
| 1025.37451                                                    | -0.39342207            | 0.033672006                                | 1           | TSEN54         | 17          |     |
| 75516060                                                      | 75524739               | +                                          | 3440        | protein_coding |             |     |
| tRNA splicing endonuclease subunit 54 [Source:HGNC            |                        |                                            |             |                |             |     |
| Symbol;Acc:HGNC:27561]                                        | -                      | 681                                        | 989         | 888            | 816         | 885 |
| 1196                                                          | 9.571717797            | 12.52842411                                | 12.05037492 |                |             |     |
| 13.18086038                                                   | 15.8136524             | 16.16604395                                |             |                |             |     |
| ENSG00000116194                                               | 0                      | 6.960683234                                | 22.32968796 | 0              | 0           |     |
| 0                                                             | 9.763457066            | 0                                          | 5.629402824 | 0.033686096    |             |     |
| 1                                                             | ANGPTL1 1              | 178849705                                  | 178871052   |                |             |     |

|                        |                         |                                        |                             |                |             |   |
|------------------------|-------------------------|----------------------------------------|-----------------------------|----------------|-------------|---|
| 3403                   | protein_coding          | angiopoietin like 1                    | [Source:HGNC                |                |             |   |
| Symbol;Acc:HGNC:489]   | -                       | 0                                      | 8                           | 24             | 0           | 0 |
| 0                      | 0                       | 0.102444026                            | 0.329226912                 | 0              | 0           |   |
| 0                      |                         |                                        |                             |                |             |   |
| ENSG00000177105        | 1285.039524             | 1074.555474                            | 1389.092672                 |                |             |   |
| 1486.691291            | 1555.140358             | 1682.945314                            | 1249.562557                 |                |             |   |
| 1574.925654            | -0.334296468            | 0.033732339                            | 1                           | RHOG           | 11          |   |
| 3826978                | 3840983                 | -                                      | 1782                        | protein_coding | ras homolog |   |
| family member G        | [Source:HGNC            | Symbol;Acc:HGNC:672]                   | -                           |                | 1336        |   |
| 1235                   | 1493                    | 1349                                   | 1283                        | 1823           | 36.24932925 |   |
| 30.20075886            | 39.11093008             | 42.06455449                            | 44.25540473                 |                |             |   |
| 47.56746279            |                         |                                        |                             |                |             |   |
| ENSG00000242808        | 0                       | 28.71281834                            | 1.86080733                  | 0              | 0           |   |
| 0                      | 10.19120856             | 0                                      | 5.692665937                 | 0.033782958    |             |   |
| 1                      | SOX2-OT 3               | 180989762                              | 181836880                   | +              |             |   |
| 31629                  | sense_overlapping       |                                        | SOX2 overlapping transcript |                |             |   |
| [Source:HGNC           | Symbol;Acc:HGNC:20209]  | -                                      | 0                           | 33             | 2           |   |
| 0                      | 0                       | 0                                      | 0                           | 0.045466034    | 0.002951825 |   |
| 0                      | 0                       | 0                                      |                             |                |             |   |
| ENSG00000160951        | 9.618559309             | 0                                      | 19.53847697                 | 0              | 0           |   |
| 0                      | 9.719012093             | 0                                      | 5.621927177                 | 0.033788583    |             |   |
| 1                      | PTGER1 19               | 14472466                               | 14475362                    | -              |             |   |
| 1421                   | protein_coding          | prostaglandin E receptor 1             |                             |                |             |   |
| [Source:HGNC           | Symbol;Acc:HGNC:9593]   | -                                      | 10                          | 0              | 21          |   |
| 0                      | 0                       | 0                                      | 0.340257055                 | 0              | 0.689876343 |   |
| 0                      | 0                       | 0                                      |                             |                |             |   |
| ENSG00000128652        | 0                       | 12.18119566                            | 16.74726597                 | 0              | 0           |   |
| 0                      | 9.642820544             | 0                                      | 5.611874741                 | 0.033798298    |             |   |
| 1                      | HOXD3 2                 | 176136612                              | 176173102                   | +              |             |   |
| 3548                   | protein_coding          | homeobox D3                            | [Source:HGNC                |                |             |   |
| Symbol;Acc:HGNC:5137]  | Homeobox                | 0                                      | 14                          | 18             | 0           |   |
| 0                      | 0                       | 0                                      | 0.171950333                 | 0.236829026    | 0           |   |
| 0                      | 0                       |                                        |                             |                |             |   |
| ENSG00000207975        | 0                       | 21.75213511                            | 7.443229322                 | 0              | 0           |   |
| 0                      | 9.731788143             | 0                                      | 5.625819041                 | 0.033814129    |             |   |
| 1                      | MIR181B1                | 1                                      | 198858873                   | 198858982      |             |   |
| -                      | 110                     | miRNA                                  | microRNA 181b-1             | [Source:HGNC   |             |   |
| Symbol;Acc:HGNC:31550] | -                       | 0                                      | 25                          | 8              | 0           | 0 |
| 0                      | 0                       | 9.90389258                             | 3.395027822                 | 0              | 0           |   |
| 0                      |                         |                                        |                             |                |             |   |
| ENSG00000252821        | 36.55052538             | 0                                      | 0                           | 0              | 0           |   |
| 12.18350846            | 0                       | 5.947654465                            | 0.033849295                 | 1              |             |   |
| RNU6-388P              | 7                       | 33001950                               | 33002054                    | -              |             |   |
| 105                    | snRNA                   | "RNA, U6 small nuclear 388, pseudogene |                             |                |             |   |
| [Source:HGNC           | Symbol;Acc:HGNC:47351]" | -                                      | 38                          | 0              | 0           |   |
| 0                      | 0                       | 0                                      | 17.49828614                 | 0              | 0           | 0 |
| 0                      | 0                       |                                        |                             |                |             |   |
| ENSG00000126067        | 4881.41885              | 4516.613333                            | 3986.779705                 |                |             |   |
| 5678.962358            | 5162.387207             | 5149.461854                            | 4461.603963                 |                |             |   |
| 5330.270473            | -0.2566465              | 0.03393278                             | 0.223171528                 | PSMB2          |             |   |



|                        |                                                            |             |                  |             |                |                  |
|------------------------|------------------------------------------------------------|-------------|------------------|-------------|----------------|------------------|
|                        | 13.71065193                                                | 12.3861661  | 11.66595722      | 10.39167809 |                |                  |
|                        | 10.4361845                                                 |             |                  |             |                |                  |
| ENSG00000147536        | 440.5300164                                                | 588.1777333 | 581.5022907      |             |                |                  |
| 976.4332717            | 599.9956956                                                | 691.456961  | 536.7366801      |             |                |                  |
| 755.9619761            | -0.493957808                                               | 0.03432505  | 1                | GINS4       | 8              |                  |
|                        | 41529206                                                   | 41545046    | +                | 5475        | protein_coding |                  |
|                        | GINS complex subunit 4 [Source:HGNC Symbol;Acc:HGNC:28226] |             |                  |             |                |                  |
|                        | -                                                          | 458         | 676              | 625         | 886            | 495 749          |
| 4.044665131            | 5.380481843                                                | 5.328953488 | 8.992110643      |             |                |                  |
| 5.557358782            | 6.36104858                                                 |             |                  |             |                |                  |
| ENSG00000042088        | 819.5012532                                                | 1171.134954 | 927.6124542      |             |                |                  |
| 1278.40022             | 1270.293917                                                | 1229.667119 | 972.7495538      |             |                |                  |
| 1259.453752            | -0.372187364                                               | 0.034430834 | 1                | TDP1        | 14             |                  |
|                        | 89954939                                                   | 90044768    | +                | 6227        | protein_coding |                  |
|                        | tyrosyl-DNA phosphodiesterase 1 [Source:HGNC               |             |                  |             |                |                  |
| Symbol;Acc:HGNC:18884] | -                                                          | 852         | 1346             | 997         | 1160           | 1048             |
|                        | 1332                                                       | 6.615488907 | 9.419433663      | 7.47415893  |                |                  |
| 10.35121114            | 10.3449829                                                 | 9.946181435 |                  |             |                |                  |
| ENSG00000092853        | 764.6754651                                                | 794.3879741 | 784.3302898      |             |                |                  |
| 1635.470627            | 847.2666489                                                | 849.3196317 | 781.131243       |             |                |                  |
| 1110.685636            | -0.507619479                                               | 0.034436557 | 1                | CLSPN       | 1              |                  |
|                        | 35720218                                                   | 35769967    | -                | 5411        | protein_coding |                  |
|                        | claspin [Source:HGNC Symbol;Acc:HGNC:19715]                |             |                  |             |                |                  |
|                        | 913                                                        | 843         | 1484             | 699         | 920            | 7.103801396      |
| 7.352784564            | 7.272706754                                                | 15.23941903 | 7.940484494      |             |                |                  |
| 7.905717867            |                                                            |             |                  |             |                |                  |
| ENSG00000048140        | 690.6125584                                                | 679.5367007 | 758.2789871      |             |                |                  |
| 794.5918611            | 1033.931976                                                | 951.7918916 | 709.4760821      |             |                |                  |
| 926.7719097            | -0.385340143                                               | 0.034694494 | 1                | TSPAN17     | 5              |                  |
|                        | 176647387                                                  | 176659054   | +                | 5215        | protein_coding |                  |
|                        | tetraspanin 17 [Source:HGNC Symbol;Acc:HGNC:13594]         |             |                  |             |                |                  |
|                        | 718                                                        | 781         | 815              | 721         | 853            | 1031 6.656889499 |
| 6.526123962            | 7.295403745                                                | 7.682330653 | 10.05407403      |             |                |                  |
| 9.192536663            |                                                            |             |                  |             |                |                  |
| ENSG00000238140        | 24.04639827                                                | 5.220512425 | 0                | 0           | 0              |                  |
| 0                      | 9.7556369                                                  | 0           | 5.627200373      | 0.034749916 |                |                  |
| 1                      | AC104170.2                                                 | 1           | 51461721         | 51463416    |                |                  |
| +                      | 678                                                        | antisense   | novel transcript | -           |                |                  |
| 25                     | 6                                                          | 0           | 0                | 0           | 1.782836559    |                  |
| 0.385638295            | 0                                                          | 0           | 0                | 0           |                |                  |
| ENSG00000162086        | 116.3845676                                                | 87.87862583 | 60.47623824      |             |                |                  |
| 42.98069706            | 49.69661317                                                | 12.92442918 | 88.24647724      |             |                |                  |
| 35.2005798             | 1.333105305                                                | 0.034759955 | 1                | ZNF75A      | 16             |                  |
|                        | 3305406                                                    | 3318852     | +                | 8063        | protein_coding | zinc finger      |
| protein 75a            | [Source:HGNC Symbol;Acc:HGNC:13146] zf-C2H2 121 101        |             |                  |             |                |                  |
|                        | 65                                                         | 39          | 41               | 14          | 0.725587725    | 0.545862565      |
|                        | 0.376324707                                                | 0.268769505 | 0.312560834      | 0.080735101 |                |                  |
| ENSG00000113739        | 709.849677                                                 | 804.8289989 | 836.432895       |             |                |                  |
| 570.8718225            | 363.6337549                                                | 711.7667783 | 783.703857       |             |                |                  |
| 548.7574519            | 0.512364574                                                | 0.03485692  | 1                | STC2        | 5              |                  |

|                                                                                            |                |                                     |                      |                |                 |
|--------------------------------------------------------------------------------------------|----------------|-------------------------------------|----------------------|----------------|-----------------|
| 173314713                                                                                  | 173329503      | -                                   | 6128                 | protein_coding |                 |
| stanniocalcin 2 [Source:HGNC Symbol;Acc:HGNC:11374]                                        |                |                                     |                      | -              |                 |
| 738                                                                                        | 925            | 899                                 | 518                  | 300            | 771             |
| 6.577813773                                                                                | 6.848366134    | 4.697026893                         | 3.009191721          |                |                 |
| 5.850145122                                                                                |                |                                     |                      |                |                 |
| ENSG00000254856                                                                            | 18.27526269    | 1.740170808                         | 4.652018326          | 0              |                 |
| 0                                                                                          | 0              | 8.222483941                         | 0                    | 5.380076835    |                 |
| 0.034896124                                                                                | 1              | NDUFA3P2                            | 11                   | 68488609       |                 |
| 68488840                                                                                   | -              | 232                                 | processed_pseudogene |                |                 |
| NADH:ubiquinone oxidoreductase subunit A3 pseudogene 2 [Source:HGNC Symbol;Acc:HGNC:45051] |                |                                     |                      | -              |                 |
| 0                                                                                          | 3.959741476    | 0.375664891                         | 1.006069667          | 0              | 0               |
| 0                                                                                          | 0              |                                     |                      |                |                 |
| ENSG00000210140                                                                            | 1690.942727    | 1194.62726                          | 1887.789037          |                |                 |
| 1571.550616                                                                                | 2060.591278    | 2906.150218                         | 1591.119674          |                |                 |
| 2179.430704                                                                                | -0.454496306   | 0.034971781                         | 1                    | MT-TC          | MT              |
| 5761                                                                                       | 5826           | -                                   | 66                   | Mt_tRNA        | mitochondrially |
| encoded tRNA cysteine [Source:HGNC Symbol;Acc:HGNC:7477]                                   |                |                                     |                      | -              |                 |
| 1758                                                                                       | 1373           | 2029                                | 1426                 | 1700           | 3148            |
| 906.5363009                                                                                | 1435.106552    | 1200.570405                         | 1583.260387          |                |                 |
| 2217.797075                                                                                |                |                                     |                      |                |                 |
| ENSG00000134545                                                                            | 0              | 23.49230591                         | 5.582421991          | 0              | 0               |
| 0                                                                                          | 9.691575969    | 0                                   | 5.619967582          | 0.035041912    |                 |
| 1                                                                                          | KLRC1          | 12                                  | 10442264             | 10454685       | -               |
| 2698                                                                                       | protein_coding | killer cell lectin like receptor C1 |                      |                |                 |
| [Source:HGNC Symbol;Acc:HGNC:6374]                                                         |                |                                     |                      | -              |                 |
| 0                                                                                          | 0              | 0                                   | 0                    | 0.436094306    | 0.10381386      |
| 0                                                                                          | 0              | 0                                   |                      |                |                 |
| ENSG00000067066                                                                            | 973.3982021    | 1366.034085                         | 1053.216949          |                |                 |
| 981.9436175                                                                                | 804.8427108    | 783.7743123                         | 1130.883079          |                |                 |
| 856.8535469                                                                                | 0.400793785    | 0.03504928                          | 1                    | SP100          | 2               |
| 230415942                                                                                  | 230544090      | +                                   | 12618                | protein_coding |                 |
| SP100 nuclear antigen [Source:HGNC Symbol;Acc:HGNC:11206]                                  |                |                                     |                      |                |                 |
| SAND                                                                                       | 1012           | 1570                                | 1132                 | 891            | 664             |
| 3.877851785                                                                                | 5.422102548    | 4.187954355                         | 3.92373099           |                |                 |
| 3.234632282                                                                                | 3.128586632    |                                     |                      |                |                 |
| ENSG00000254064                                                                            | 159.6680845    | 85.26836962                         | 105.1356142          |                |                 |
| 28.65379804                                                                                | 50.90872568    | 80.31609561                         | 116.6906894          |                |                 |
| 53.29287311                                                                                | 1.126000854    | 0.035080146                         | 1                    | AC105206.2     |                 |
| 8                                                                                          | 22254576       | 22275162                            | -                    | 515            |                 |
| antisense uncharacterized LOC100507071 [Source:NCBI gene;Acc:100507071]                    |                |                                     |                      | -              |                 |
| 87                                                                                         | 15.58483022    | 8.292346564                         | 10.24276598          | 113            | 26              |
| 2.805292577                                                                                | 5.012904391    | 7.854943069                         |                      |                | 42              |
| ENSG00000168137                                                                            | 2901.919344    | 2386.644264                         | 2578.148556          |                |                 |
| 2454.308009                                                                                | 1799.987087    | 2044.829331                         | 2622.237388          |                |                 |
| 2099.708142                                                                                | 0.320362556    | 0.035109412                         | 1                    | SETD5          | 3               |
| 9397615                                                                                    | 9479240        | +                                   | 10808                | protein_coding | SET domain      |
| containing 5 [Source:HGNC Symbol;Acc:HGNC:25566]                                           |                |                                     |                      | -              |                 |
| 2743                                                                                       | 2771           | 2227                                | 1485                 | 2215           | 13.49681175     |
|                                                                                            |                |                                     |                      |                | 3017            |

|                                                                    |                                           |                |              |                 |             |
|--------------------------------------------------------------------|-------------------------------------------|----------------|--------------|-----------------|-------------|
| 11.05959107                                                        | 11.96843114                               | 11.44951063    | 8.445560509  |                 |             |
| 9.529265181                                                        |                                           |                |              |                 |             |
| ENSG00000075426                                                    | 954.1610835                               | 728.2614834    | 1029.956857  |                 |             |
| 1247.542284                                                        | 1121.204078                               | 1157.659585    | 904.1264747  |                 |             |
| 1175.468649                                                        | -0.378987628                              | 0.035168212    | 1            | FOSL2           | 2           |
| 28392448                                                           | 28417312                                  | +              | 7157         | protein_coding  |             |
| "FOS like 2, AP-1 transcription factor subunit [Source:HGNC        |                                           |                |              |                 |             |
| Symbol;Acc:HGNC:3798]"                                             | TF_bZIP                                   | 992            | 837          | 1107            | 1132 925    |
| 1254                                                               | 6.701651987                               | 5.096277155    | 7.220422976  |                 |             |
| 8.788756928                                                        | 7.944344628                               | 8.146996644    |              |                 |             |
| ENSG00000255248                                                    | 1751.53965                                | 2081.244287    | 1876.624193  |                 |             |
| 1616.735451                                                        | 1512.71642                                | 1526.005817    | 1903.136043  |                 |             |
| 1551.819229                                                        | 0.29457056                                | 0.0351925      | 1            | MIR100HG        |             |
| 11                                                                 | 122028327                                 | 122556721      | -            | 19385           |             |
| processed_transcript mir-100-let-7a-2-mir-125b-1 cluster host gene |                                           |                |              |                 |             |
| [Source:HGNC                                                       | Symbol;Acc:HGNC:39522]"                   | -              | 1821         | 2392            | 2017        |
| 1467                                                               | 1248                                      | 1653           | 4.541981458  | 5.377172485     |             |
| 4.857201592                                                        | 4.205100233                               | 3.957274169    | 3.964953208  |                 |             |
| ENSG00000212128                                                    | 7.694847448                               | 12.18119566    | 3.721614661  | 0               |             |
| 0                                                                  | 0                                         | 7.865885923    | 0            | 5.318024223     |             |
| 0.035221061                                                        | 1                                         | TAS2R13        | 12           | 10907926        | 10909562    |
| -                                                                  | 1637                                      | protein_coding | taste 2      | receptor member | 13          |
| [Source:HGNC                                                       |                                           |                |              |                 |             |
| Symbol;Acc:HGNC:14919]"                                            | -                                         | 8              | 14           | 4               |             |
| 0                                                                  | 0                                         | 0              | 0.236288467  | 0.372681602     |             |
| 0.114066298                                                        | 0                                         | 0              | 0            |                 |             |
| ENSG00000243970                                                    | 216.4175845                               | 149.6546895    | 194.454366   |                 |             |
| 98.08415483                                                        | 86.05998866                               | 137.5528534    | 186.8422133  |                 |             |
| 107.2323323                                                        | 0.797583316                               | 0.035252756    | 1            | PPIEL           | 1           |
| 39522280                                                           | 39559671                                  | -              | 5416         |                 |             |
| transcribed_unprocessed_pseudogene peptidylprolyl isomerase E      |                                           |                |              |                 |             |
| like pseudogene [Source:HGNC                                       | Symbol;Acc:HGNC:33195]"                   | -              | 225          |                 |             |
| 172                                                                | 209                                       | 89             | 71           | 149             | 2.008653746 |
| 1.383911725                                                        | 1.80141455                                | 0.913110621    | 0.805799611  |                 |             |
| 1.279200531                                                        |                                           |                |              |                 |             |
| ENSG00000272320                                                    | 0                                         | 0              | 0            | 9.918622399     | 0           |
| 16.61712323                                                        | 0                                         | 8.845248543    | -5.711178331 | 0.035297051     |             |
| 1                                                                  | AL445309.1                                | 6              | 3311662      | 3313650         | +           |
| antisense                                                          | "novel transcript, antisense to SLC22A23" |                |              |                 | 1989        |
| -                                                                  | 0                                         | 0              | 9            | 0               | 18          |
| 0                                                                  | 0                                         | 0.251431548    | 0            | 0.420793226     | 0           |
| ENSG00000256746                                                    | 12.5041271                                | 11.31111026    | 0.930403665  | 0               |             |
| 0                                                                  | 0                                         | 8.248547008    | 0            | 5.386083837     |             |
| 0.035335448                                                        | 1                                         | AC018410.1     | 11           | 47270657        |             |
| 47272110                                                           | -                                         | 536            | antisense    | uncharacterized |             |
| LOC101928943 [Source:NCBI gene;Acc:101928943]"                     |                                           |                |              |                 |             |
| 1                                                                  | 0                                         | 0              | 0            | 1.172680704     | 1.05690794  |
| 0.087092598                                                        | 0                                         | 0              | 0            |                 |             |
| ENSG00000160789                                                    | 14542.29982                               | 16561.20558    | 23318.70706  |                 |             |
| 23608.52545                                                        | 24656.79281                               | 19907.31363    | 18140.73749  |                 |             |
| 22724.21063                                                        | -0.324956899                              | 0.035409875    | 0.230814014  |                 | LMNA        |

|                                 |                                                         |              |                                      |                       |                |                |
|---------------------------------|---------------------------------------------------------|--------------|--------------------------------------|-----------------------|----------------|----------------|
| 1                               | 156082573                                               | 156140089    | +                                    | 6985                  |                |                |
| protein_coding                  | lamin A/C [Source:HGNC Symbol;Acc:HGNC:6636]            |              |                                      |                       |                | -              |
| 15119                           | 19034                                                   | 25063        | 21422                                | 20342                 | 21564          | 104.6544918    |
|                                 | 118.7468922                                             | 167.4991778  | 170.4141482                          |                       |                | 179.0088901    |
|                                 | 143.5469373                                             |              |                                      |                       |                |                |
| ENSG00000198727                 | 23903.08174                                             | 26411.44245  |                                      | 31110.83776           |                |                |
|                                 | 28081.82415                                             | 33026.42973  |                                      | 37541.77407           |                | 27141.78731    |
|                                 | 32883.34265                                             | -0.276867443 | 0.035507531                          | 0.230814014           |                | MT-CYB         |
|                                 | MT                                                      | 14747        | 15887                                | +                     | 1141           | protein_coding |
| mitochondrially                 | encoded cytochrome b [Source:HGNC                       |              |                                      |                       |                |                |
| Symbol;Acc:HGNC:7427]           | -                                                       | 24851        | 30355                                | 33438                 | 25481          | 27247          |
|                                 | 40666                                                   | 1053.075336  | 1159.319633                          | 1368.04595            |                |                |
|                                 | 1240.91738                                              | 1467.845709  | 1657.207271                          |                       |                |                |
| ENSG00000166016                 | 139.46911                                               | 110.5008463  |                                      | 103.2748068           |                |                |
|                                 | 39.6744896                                              | 88.48421369  | 42.46598159                          | 117.7482544           |                |                |
|                                 | 56.87489496                                             | 1.054445794  | 0.035525487                          | 1                     | ABTB2          | 11             |
|                                 | 34150988                                                | 34358008     | -                                    | 4973                  | protein_coding |                |
|                                 | ankyrin repeat and BTB domain containing 2 [Source:HGNC |              |                                      |                       |                |                |
| Symbol;Acc:HGNC:23842]          | -                                                       | 145          | 127                                  | 111                   | 36             | 73             |
|                                 | 46                                                      | 1.409778099  | 1.112868525                          | 1.04195882            |                |                |
|                                 | 0.40225003                                              | 0.90230167   | 0.430100939                          |                       |                |                |
| ENSG00000236478                 | 5.771135586                                             | 0            | 23.26009163                          | 0                     | 0              |                |
|                                 | 0                                                       | 9.677075738  | 0                                    | 5.615847071           | 0.035532457    |                |
|                                 | 1                                                       | AC012513.2   | 2                                    | 216174896             | 216176032      |                |
|                                 | -                                                       | 1137         | processed_pseudogene                 | heterogeneous nuclear |                |                |
| ribonucleoprotein A3 (HNRNPA3)  | pseudogene                                              | -            | 6                                    | 0                     |                |                |
|                                 | 25                                                      | 0            | 0                                    | 0                     | 0.255147902    | 0              |
|                                 | 1.02642112                                              | 0            | 0                                    |                       |                |                |
| ENSG00000142102                 | 142.3546778                                             | 158.3555436  |                                      | 163.7510451           |                |                |
|                                 | 104.6965698                                             | 89.69632621  | 66.46849292                          | 154.8204221           |                |                |
|                                 | 86.9537963                                              | 0.834571781  | 0.035544108                          | 1                     | PGGHG          | 11             |
|                                 | 289135                                                  | 296107       | +                                    | 5260                  | protein_coding | protein-       |
| glucosylgalactosylhydroxylysine | glucosidase [Source:HGNC                                |              |                                      |                       |                |                |
| Symbol;Acc:HGNC:26210]          | -                                                       | 148          | 182                                  | 176                   | 95             | 74             |
|                                 | 72                                                      | 1.360433093  | 1.507801745                          | 1.561970975           |                |                |
|                                 | 1.003575163                                             | 0.864755506  | 0.636469754                          |                       |                |                |
| ENSG00000180846                 | 2.885567793                                             | 8.700854042  |                                      | 12.09524765           | 0              |                |
|                                 | 0                                                       | 0            | 7.893889828                          | 0                     | 5.323017434    |                |
|                                 | 0.03555126                                              | 1            | CSNK1G2-AS1                          | 19                    | 1952531        | 1954586 -      |
|                                 | 1346                                                    | antisense    | CSNK1G2 antisense RNA 1 [Source:HGNC |                       |                |                |
| Symbol;Acc:HGNC:28604]          | -                                                       | 3            | 10                                   | 13                    | 0              | 0              |
|                                 | 0                                                       | 0.10776492   | 0.323752804                          | 0.450862722           | 0              |                |
|                                 | 0                                                       | 0            |                                      |                       |                |                |
| ENSG00000168517                 | 45.20722875                                             | 50.46495345  |                                      | 43.72897226           |                |                |
|                                 | 12.12276071                                             | 21.81802529  | 12.92442918                          | 46.46705149           |                |                |
|                                 | 15.62173839                                             | 1.578137693  | 0.035563713                          | 1                     | HEXIM2         | 17             |
|                                 | 45160700                                                | 45170040     | +                                    | 2038                  | protein_coding |                |
|                                 | hexamethylene bisacetamide inducible 2 [Source:HGNC     |              |                                      |                       |                |                |
| Symbol;Acc:HGNC:28591]          | -                                                       | 47           | 58                                   | 47                    | 11             | 18             |
|                                 | 14                                                      | 1.115051419  | 1.240173399                          | 1.076563656           |                |                |

|                                                                 |                                                      |                                        |             |                |             |      |
|-----------------------------------------------------------------|------------------------------------------------------|----------------------------------------|-------------|----------------|-------------|------|
| 0.299916631                                                     | 0.542894805                                          | 0.319414682                            |             |                |             |      |
| ENSG00000081985                                                 | 0                                                    | 18.27179349                            | 10.23444032 | 0              | 0           |      |
|                                                                 | 0                                                    | 9.502077935                            | 0           | 5.591146931    | 0.035576793 |      |
| 1                                                               | IL12RB2                                              | 1                                      | 67307364    | 67397090       |             | +    |
| 4423                                                            | protein_coding                                       | interleukin 12 receptor subunit beta 2 |             |                |             |      |
| [Source:HGNC Symbol;Acc:HGNC:5972]                              |                                                      |                                        | -           | 0              | 21          | 11   |
|                                                                 | 0                                                    | 0                                      | 0           | 0.20690022     | 0.11609721  |      |
|                                                                 | 0                                                    | 0                                      |             |                |             |      |
| ENSG00000185085                                                 | 1744.806659                                          | 1796.72636                             | 1858.946523 |                |             |      |
| 1916.498261                                                     | 2099.378878                                          | 2818.448734                            | 1800.159847 |                |             |      |
| 2278.108625                                                     | -0.340271633                                         | 0.035577203                            | 1           | INTS5          | 11          |      |
| 62646848                                                        | 62653302                                             | -                                      | 3285        | protein_coding |             |      |
| integrator complex subunit 5 [Source:HGNC                       |                                                      |                                        |             |                |             |      |
| Symbol;Acc:HGNC:29352]                                          | -                                                    | 1814                                   | 2065        | 1998           | 1739        | 1732 |
|                                                                 | 3053                                                 | 26.69949981                            | 27.39323226 | 28.39266418    |             |      |
| 29.41550114                                                     | 32.4085704                                           | 43.2137991                             |             |                |             |      |
| ENSG00000099956                                                 | 3437.673097                                          | 3362.010002                            | 3537.394735 |                |             |      |
| 3961.938614                                                     | 3955.123141                                          | 4253.983547                            | 3445.692611 |                |             |      |
| 4057.0151                                                       | -0.235796033                                         | 0.035577541                            | 0.230814014 |                |             |      |
| SMARCB1                                                         | 22                                                   | 23786931                               | 23838008    | +              | 16525       |      |
| protein_coding                                                  | "SWI/SNF related, matrix associated, actin dependent |                                        |             |                |             |      |
| regulator of chromatin, subfamily b, member 1 [Source:HGNC      |                                                      |                                        |             |                |             |      |
| Symbol;Acc:HGNC:11103]"                                         | -                                                    | 3574                                   | 3864        | 3802           | 3595        | 3263 |
|                                                                 | 4608                                                 | 10.45717309                            | 10.18953223 | 10.74030662    |             |      |
| 12.08841804                                                     | 12.13732457                                          | 12.96588067                            |             |                |             |      |
| ENSG00000069011                                                 | 136.5835422                                          | 159.225629                             | 118.1612655 |                |             |      |
| 213.8014162                                                     | 253.3315159                                          | 201.2518258                            | 137.9901456 |                |             |      |
| 222.7949193                                                     | -0.689812337                                         | 0.035581761                            | 1           | PITX1          | 5           |      |
| 135027735                                                       | 135034813                                            | -                                      | 3511        | protein_coding |             |      |
| paired like homeodomain 1 [Source:HGNC Symbol;Acc:HGNC:9004]    |                                                      |                                        |             |                |             |      |
| Homeobox                                                        | 142                                                  | 183                                    | 127         | 194            | 209         | 218  |
| 1.955504103                                                     | 2.271322787                                          | 1.688569449                            | 3.070315069 |                |             |      |
| 3.659003432                                                     | 2.887065801                                          |                                        |             |                |             |      |
| ENSG00000107796                                                 | 9.618559309                                          | 29.58290374                            | 32.56412828 |                |             |      |
| 65.02208017                                                     | 79.99942608                                          | 50.7745432                             | 23.92186378 |                |             |      |
| 65.26534982                                                     | -1.444655862                                         | 0.035606349                            | 1           | ACTA2          | 10          |      |
| 88935074                                                        | 88991339                                             | -                                      | 2976        | protein_coding |             |      |
| "actin, alpha 2, smooth muscle, aorta [Source:HGNC              |                                                      |                                        |             |                |             |      |
| Symbol;Acc:HGNC:130]"                                           | -                                                    | 10                                     | 34          | 35             | 59          | 66   |
|                                                                 | 55                                                   | 0.16246817                             | 0.497856966 | 0.549011136    |             |      |
| 1.101618266                                                     | 1.363196206                                          | 0.859331597                            |             |                |             |      |
| ENSG00000233559                                                 | 45.20722875                                          | 18.27179349                            | 22.32968796 |                |             |      |
| 4.408276622                                                     | 8.484787614                                          | 6.462214589                            | 28.6029034  |                |             |      |
| 6.451759608                                                     | 2.150443233                                          | 0.035685688                            | 1           | LINC00513      |             |      |
| 7                                                               | 130853720                                            | 130928649                              | +           | 1616           |             |      |
| lincRNA long intergenic non-protein coding RNA 513 [Source:HGNC |                                                      |                                        |             |                |             |      |
| Symbol;Acc:HGNC:43566]                                          | -                                                    | 47                                     | 21          | 24             | 4           | 7    |
|                                                                 | 7                                                    | 1.406234401                            | 0.566286927 | 0.693291573    |             |      |
| 0.137540525                                                     | 0.266258845                                          | 0.201413094                            |             |                |             |      |
| ENSG00000154118                                                 | 12.5041271                                           | 29.58290374                            | 29.77291729 |                |             | 0    |



|                                     |                                      |              |                 |                              |             |                |
|-------------------------------------|--------------------------------------|--------------|-----------------|------------------------------|-------------|----------------|
|                                     | 8.484787614                          | 0            | 23.95331604     | 2.828262538                  |             |                |
| 3.122335756                         | 0.035785141                          |              | 1               | JPH3                         | 16          | 87601835       |
|                                     | 87698156                             | +            | 5941            | protein_coding               |             | junctophilin 3 |
| [Source:HGNC Symbol;Acc:HGNC:14203] |                                      |              | -               |                              | 13          | 34 32          |
|                                     | 0                                    | 7            | 0               | 0.105799841                  | 0.249389384 |                |
| 0.251441212                         | 0                                    | 0.072424557  | 0               |                              |             |                |
| ENSG00000165322                     | 763.7136092                          |              | 972.7554819     | 815.9640144                  |             |                |
| 818.8373825                         | 490.9055691                          |              | 516.9771671     | 850.8110352                  |             |                |
| 608.9067062                         | 0.482917425                          |              | 0.035810004     | 1                            |             | ARHGAP12       |
|                                     | 10                                   | 31805404     | 31928876        | -                            |             | 5938           |
| protein_coding                      | Rho GTPase activating protein 12     | [Source:HGNC |                 |                              |             |                |
| Symbol;Acc:HGNC:16348]              | -                                    | 794          | 1118            | 877                          | 743         | 405            |
|                                     | 560                                  | 6.465193471  | 8.204652809     | 6.894542228                  |             |                |
| 6.952814844                         | 4.192394959                          |              | 4.385093439     |                              |             |                |
| ENSG00000128578                     | 806.0352701                          |              | 850.0734399     | 727.5756662                  |             |                |
| 510.258019                          | 610.9047082                          |              | 673.9166643     | 794.5614588                  |             |                |
| 598.3597972                         | 0.408634755                          |              | 0.035863153     | 1                            |             | STRIP2 7       |
|                                     | 129434433                            | 129488399    | +               | 5876                         |             | protein_coding |
|                                     | striatin interacting protein 2       | [Source:HGNC |                 |                              |             |                |
| Symbol;Acc:HGNC:22209]              | -                                    | 838          | 977             | 782                          | 463         | 504            |
|                                     | 730                                  | 6.895463247  | 7.245550276     | 6.212565803                  |             |                |
| 4.378357782                         | 5.272251384                          |              | 5.776597276     |                              |             |                |
| ENSG00000280287                     | 345.3062792                          |              | 304.5298915     | 300.5203839                  |             |                |
| 179.6372723                         | 201.2106777                          |              | 250.1800219     | 316.7855182                  |             |                |
| 210.3426573                         | 0.5890883                            |              | 0.035895735     | 1                            |             | AC131212.3     |
|                                     | 12                                   | 132550729    | 132554947       | +                            | 4219        | TEC            |
|                                     | novel transcript                     | -            | 359             | 350                          | 323         | 163            |
|                                     | 166                                  | 271          | 4.114207009     | 3.615073376                  | 3.573872319 |                |
|                                     | 2.146792763                          | 2.41849906   | 2.986694372     |                              |             |                |
| ENSG00000259349                     | 8.656703379                          |              | 12.18119566     | 2.791210996                  |             | 0              |
|                                     | 0                                    | 0            | 7.876370011     | 0                            | 5.319873936 |                |
| 0.035949481                         | 1                                    | AC011921.1   | 17              | 60526293                     |             |                |
| 60550798                            | +                                    | 718          | antisense       | "novel transcript,           |             |                |
| antisense to APPBP2"                | -                                    | 9            | 14              | 3                            | 0           | 0              |
|                                     | 0                                    | 0.606065108  | 0.849693291     | 0.195048604                  | 0           |                |
|                                     | 0                                    | 0            |                 |                              |             |                |
| ENSG00000212242                     | 19.23711862                          |              | 3.480341617     | 1.86080733                   |             | 0              |
|                                     | 0                                    | 0            | 8.192755855     | 0                            | 5.37500225  |                |
| 0.0360235                           | 1                                    | RNA5SP219    | 6               | 136630243                    |             |                |
| 136630355                           | +                                    | 113          | rRNA_pseudogene | "RNA, 5S ribosomal           |             |                |
| pseudogene 219                      | [Source:HGNC Symbol;Acc:HGNC:43119]" | -            |                 |                              |             | 20             |
|                                     | 4                                    | 2            | 0               | 0                            | 8.557615485 |                |
| 1.542553181                         | 0.826223585                          |              | 0               | 0                            | 0           |                |
| ENSG00000269534                     | 15.3896949                           |              | 0               | 13.02565131                  | 0           | 0              |
|                                     | 0                                    | 9.471782069  | 0               | 5.584501331                  | 0.036066334 |                |
|                                     | 1                                    | AC011466.3   | 19              | 48118432                     | 48127706    |                |
|                                     | +                                    | 1009         | antisense       | "novel transcript, antisense |             |                |
| to LIG1"                            | -                                    | 16           | 0               | 14                           | 0           | 0 0            |
|                                     | 0.766708067                          | 0            | 0.647713435     | 0                            | 0           | 0              |
| ENSG00000136942                     | 12312.71777                          |              | 12849.42125     | 17570.67322                  |             |                |

|                                     |                            |                       |             |                      |             |
|-------------------------------------|----------------------------|-----------------------|-------------|----------------------|-------------|
| 15722.11857                         | 17751.3878                 | 18876.12881           | 14244.27075 |                      |             |
| 17449.8784                          | -0.292864226               | 0.036088997           | 0.232611482 | RPL35                |             |
| 9                                   | 124857880                  | 124861981             | -           | 1535                 |             |
| protein_coding                      | ribosomal protein L35      | [Source:HGNC          |             |                      |             |
| Symbol;Acc:HGNC:10344]              | -                          | 12801                 | 14768       | 18885                | 14266 14645 |
| 20447                               | 403.2150504                | 419.2488709           | 574.3209321 |                      |             |
| 516.4233654                         | 586.4464429                | 619.3729513           |             |                      |             |
| ENSG00000156931                     | 907.9919988                | 1066.724706           | 962.9677935 |                      |             |
| 851.8994571                         | 729.6917348                | 688.6874405           | 979.228166  |                      |             |
| 756.7595442                         | 0.372318159                | 0.036089966           | 1           | VPS8                 | 3           |
| 184812143                           | 185052614                  | +                     | 10366       | protein_coding       |             |
| "VPS8, CORVET complex subunit       | [Source:HGNC               |                       |             |                      |             |
| Symbol;Acc:HGNC:29122]"             | -                          | 944                   | 1226        | 1035                 | 773 602     |
| 746                                 | 4.403135052                | 5.153922259           | 4.66095791  |                      |             |
| 4.143623935                         | 3.569707625                | 3.346251979           |             |                      |             |
| ENSG00000151835                     | 5536.442739                | 4330.415057           | 4808.326142 |                      |             |
| 4439.134558                         | 3825.427101                | 3870.866539           | 4891.727979 |                      |             |
| 4045.142733                         | 0.274081926                | 0.036124506           | 0.232611482 | SACS                 |             |
| 13                                  | 23328826                   | 23433740              | -           | 15918                |             |
| protein_coding                      | sacsin molecular chaperone | [Source:HGNC          |             |                      |             |
| Symbol;Acc:HGNC:10519]              | -                          | 5756                  | 4977        | 5168                 | 4028 3156   |
| 4193                                | 17.48370626                | 13.6250385            | 15.155841   |                      |             |
| 14.0608963                          | 12.18697315                | 12.24806211           |             |                      |             |
| ENSG00000231292                     | 9.618559309                | 6.09059783            | 7.443229322 |                      | 0           |
| 0                                   | 0                          | 7.717462154           | 0           | 5.289626998          |             |
| 0.036136568                         | 1                          | IGKV10R2-108          | 2           | 113406396            |             |
| 113406872                           | +                          | 353                   | IG_V_gene   | immunoglobulin kappa |             |
| variable 1/OR2-108 (non-functional) | [Source:HGNC               |                       |             |                      |             |
| Symbol;Acc:HGNC:5767]               | -                          | 10                    | 7           | 8                    | 0 0         |
| 0                                   | 1.369703328                | 0.86413567            | 1.057940681 | 0                    |             |
| 0                                   | 0                          |                       |             |                      |             |
| ENSG00000095906                     | 1482.21999                 | 1185.056321           | 1379.788635 |                      |             |
| 1471.262322                         | 1730.896673                | 1915.585039           | 1349.021649 |                      |             |
| 1705.914678                         | -0.339135075               | 0.036146691           | 1           | NUBP2                | 16          |
| 1782901                             | 1789191                    | +                     | 4983        | protein_coding       | nucleotide  |
| binding protein 2                   | [Source:HGNC               | Symbol;Acc:HGNC:8042] | -           |                      | 1541        |
| 1362                                | 1483                       | 1335                  | 1428        | 2075                 | 14.95247097 |
| 11.91090657                         | 13.89300844                | 14.88683662           | 17.61508246 |                      |             |
| 19.36235739                         |                            |                       |             |                      |             |
| ENSG00000279716                     | 41.35980503                | 18.27179349           | 43.72897226 |                      |             |
| 12.12276071                         | 2.424225033                | 10.15490864           | 34.45352359 |                      |             |
| 8.233964794                         | 2.055047535                | 0.036150804           | 1           | AC006128.1           |             |
| 19                                  | 15398696                   | 15400356              | +           | 1661                 | TEC         |
| TEC                                 | -                          | 43                    | 21          | 47                   | 11          |
| 1.251699387                         | 0.550945018                | 1.320913143           | 0.36798922  |                      |             |
| 0.074012951                         | 0.307931467                |                       |             |                      |             |
| ENSG00000101310                     | 1639.002506                | 1586.165692           | 1503.532323 |                      |             |
| 2012.378278                         | 2193.923655                | 1672.790405           | 1576.233507 |                      |             |
| 1959.697446                         | -0.313566571               | 0.036180886           | 1           | SEC23B               | 20          |
| 18507482                            | 18561415                   | +                     | 4385        | protein_coding       |             |

"Sec23 homolog B, coat complex II component [Source:HGNC  
Symbol;Acc:HGNC:10702]" - 1704 1823 1616 1826 1810  
1812 18.78889369 18.11655716 17.20353893  
23.13892717 25.3720955 19.21408085  
ENSG00000117114 615.5877958 566.4255982 649.4217583  
1043.65949 866.6604492 612.9872125 610.4783841  
841.1023839 -0.461591057 0.036197319 1 ADGRL2 1  
81306160 81992436 + 7754 protein\_coding  
adhesion G protein-coupled receptor L2 [Source:HGNC  
Symbol;Acc:HGNC:18582] - 640 651 698 947 715  
664 3.990758008 3.658590393 4.202189776  
6.786349558 5.667970815 3.981743693  
ENSG00000235618 8.656703379 6.09059783 8.373632987 0  
0 0 7.706978065 0 5.287732549  
0.036215229 1 FAM21EP 10 50021182 50067803  
- 2549  
transcribed\_unprocessed\_pseudogene "family with sequence  
similarity 21 member E, pseudogene [Source:HGNC  
Symbol;Acc:HGNC:45010]" - 9 7 9 0 0  
0 0.170715868 0.119670416 0.16482334 0  
0 0  
ENSG00000198363 13596.79544 14999.40228 13309.42443  
12519.50561 12288.39669 11150.08969 13968.54072  
11985.99733 0.220930273 0.036234686 0.232611482 ASPH  
8 61500556 61714640 - 20047  
protein\_coding aspartate beta-hydroxylase [Source:HGNC  
Symbol;Acc:HGNC:757] - 14136 17239 14305 11360 10138  
12078 34.09403186 37.4732428 33.31075741  
31.48770331 31.08495598 28.01409861  
ENSG00000233270 22.12268641 26.97264753 31.63372462  
44.08276622 98.18111382 60.92945184 26.90968619  
67.73111063 -1.329657042 0.036281938 1 SNRPEP4 19  
5576660 5576938 - 279 processed\_pseudogene small  
nuclear ribonucleoprotein polypeptide E pseudogene 4 [Source:HGNC  
Symbol;Acc:HGNC:43446] - 23 31 34 40 81  
66 3.985885779 4.841903039 5.6888011  
7.966504975 17.84547761 10.99944444  
ENSG00000266445 13.46598303 0 14.88645864 0 0  
0 9.450813892 0 5.581380149 0.036288678  
1 NARF-AS1 17 82476597 82477924  
- 838 antisense NARF antisense RNA 1  
[Source:HGNC Symbol;Acc:HGNC:53622] - 14 0 16  
0 0 0 0.807765376 0 0.891296087  
0 0 0  
ENSG00000204427 103.8804405 28.71281834 43.72897226  
25.34759057 16.96957523 17.54029674 58.77407705  
19.95248751 1.557759466 0.036347588 1 ABHD16A 6  
31686949 31703444 - 4153 protein\_coding  
abhydrolase domain containing 16A [Source:HGNC  
Symbol;Acc:HGNC:13921] - 108 33 47 23 14

|                                   |                                        |                                   |                        |                |             |     |
|-----------------------------------|----------------------------------------|-----------------------------------|------------------------|----------------|-------------|-----|
| 19                                | 1.257369846                            | 0.346266603                       | 0.528301645            |                |             |     |
| 0.307735748                       | 0.207211314                            | 0.212727036                       |                        |                |             |     |
| ENSG00000187672                   | 13.46598303                            | 14.79145187                       | 0                      | 0              | 0           |     |
| 0                                 | 9.419144968                            | 0                                 | 5.577694641            | 0.036356203    |             |     |
| 1                                 | ERC2                                   | 3                                 | 55508308               | 56468363       | -           |     |
| 7933                              | protein_coding                         | ELKS/RAB6-interacting/CAST family |                        |                |             |     |
| member 2                          | [Source:HGNC Symbol;Acc:HGNC:31922]    |                                   |                        | -              | 14          | 17  |
| 0                                 | 0                                      | 0                                 | 0                      | 0.085328045    | 0.093383482 |     |
| 0                                 | 0                                      | 0                                 | 0                      |                |             |     |
| ENSG00000222031                   | 13.46598303                            | 14.79145187                       | 0                      | 0              | 0           |     |
| 0                                 | 9.419144968                            | 0                                 | 5.577694641            | 0.036356203    |             |     |
| 1                                 | AC023469.1                             | 2                                 | 151001220              | 151048774      |             |     |
| -                                 | 469                                    | lincRNA                           | novel transcript       | -              | 14          |     |
| 17                                | 0                                      | 0                                 | 0                      | 0              | 1.443299328 |     |
| 1.579554723                       | 0                                      | 0                                 | 0                      | 0              |             |     |
| ENSG00000274100                   | 13.46598303                            | 4.350427021                       | 5.582421991            | 0              |             |     |
| 0                                 | 0                                      | 7.799610682                       | 0                      | 5.304423642    |             |     |
| 0.036423528                       | 1                                      | AL627230.1                        | 9                      | 67721884       |             |     |
| 67722094                          | -                                      | 211                               | unprocessed_pseudogene | family with    |             |     |
| sequence similarity               | 27-like                                | (FAM27L)                          | pseudogene             | -              | 14          | 5   |
| 6                                 | 0                                      | 0                                 | 0                      | 3.208091872    | 1.03263335  |     |
| 1.327439788                       | 0                                      | 0                                 | 0                      |                |             |     |
| ENSG00000271216                   | 385.7042283                            | 632.5520889                       | 401.9343834            |                |             |     |
| 244.6593525                       | 358.7853048                            | 343.4205467                       | 473.3969002            |                |             |     |
| 315.6217347                       | 0.585304383                            | 0.036425981                       | 1                      | LINC01050      |             |     |
| 13                                | 42810366                               | 42812562                          | -                      | 760            |             |     |
| lincRNA                           | long intergenic non-protein coding RNA | 1050                              | [Source:HGNC           |                |             |     |
| Symbol;Acc:HGNC:49044]            | -                                      | 401                               | 727                    | 432            | 222         | 296 |
| 372                               | 25.51126516                            | 41.68496261                       | 26.53482272            |                |             |     |
| 16.23122977                       | 23.94007348                            | 22.75937679                       |                        |                |             |     |
| ENSG00000230185                   | 21.16083048                            | 21.75213511                       | 29.77291729            |                |             |     |
| 8.816553243                       | 0                                      | 0                                 | 24.22862762            | 2.938851081    |             |     |
| 3.0508296                         | 0.036475417                            | 1                                 | C9orf147               | 9              |             |     |
| 112433816                         | 112487204                              | -                                 | 1718                   | antisense      |             |     |
| chromosome 9 open reading frame   | 147                                    | [Source:HGNC                      |                        |                |             |     |
| Symbol;Acc:HGNC:31438]            | -                                      | 22                                | 25                     | 32             | 8           | 0   |
| 0                                 | 0.619156929                            | 0.634125835                       | 0.869506544            |                |             |     |
| 0.258749114                       | 0                                      | 0                                 |                        |                |             |     |
| ENSG00000239665                   | 465.5382706                            | 241.013657                        | 410.3080163            |                |             |     |
| 224.8221077                       | 261.8163035                            | 234.4860722                       | 372.286648             |                |             |     |
| 240.3748278                       | 0.630968968                            | 0.036561235                       | 1                      | AL157392.3     |             |     |
| 10                                | 13631143                               | 13668445                          | +                      | 15012          |             |     |
| processed_transcript              | novel transcript                       | -                                 |                        | 484            | 277         |     |
| 441                               | 204                                    | 216                               | 254                    | 1.558863263    | 0.80408102  |     |
| 1.371342923                       | 0.755098583                            | 0.884428147                       | 0.786730847            |                |             |     |
| ENSG00000112759                   | 1658.239625                            | 1499.157152                       | 1583.547038            |                |             |     |
| 1877.925841                       | 2064.227615                            | 1838.038464                       | 1580.314605            |                |             |     |
| 1926.73064                        | -0.285749748                           | 0.036565149                       | 1                      | SLC29A1        | 6           |     |
| 44219505                          | 44234151                               | +                                 | 4408                   | protein_coding |             |     |
| solute carrier family 29 member 1 | (Augustine blood group)                |                                   |                        |                |             |     |

|                                              |                                     |             |                              |                     |
|----------------------------------------------|-------------------------------------|-------------|------------------------------|---------------------|
| [Source:HGNC Symbol;Acc:HGNC:11003]          | -                                   | 1724        | 1723                         | 1702                |
| 1704                                         | 1703                                | 1991        | 18.91023353                  | 17.03343703         |
| 18.02453235                                  | 21.48028544                         | 23.74763812 | 21.00200185                  |                     |
| ENSG00000284738                              | 24.04639827                         | 11.31111026 | 10.23444032                  | 0                   |
| 3.636337549                                  | 0                                   | 15.19731628 | 1.212112516                  |                     |
| 3.709528012                                  | 0.036582527                         | 1           | AL358472.5                   | 1                   |
| 153923337                                    | 153935240                           | +           | 1267                         | antisense           |
| uncharacterized LOC101928059                 | [Source:NCBI gene;Acc:101928059]    | -           |                              |                     |
| 25                                           | 13                                  | 11          | 0                            | 3                   |
| 0.447121275                                  | 0.40528647                          | 0           | 0.145543227                  | 0                   |
| ENSG00000114857                              | 1840.992252                         | 1380.825537 | 1458.872947                  |                     |
| 1422.77128                                   | 1147.870553                         | 1049.648284 | 1560.230245                  |                     |
| 1206.763372                                  | 0.370758967                         | 0.036625121 | 1                            | NKTR 3              |
| 42600614                                     | 42648741                            | +           | 17356                        | protein_coding      |
| natural killer cell triggering receptor      | [Source:HGNC                        |             |                              |                     |
| Symbol;Acc:HGNC:7833]                        | -                                   | 1914        | 1587                         | 1568 1291 947       |
| 1137                                         | 5.332041347                         | 3.984610573 | 4.217377267                  |                     |
| 4.133221163                                  | 3.353881375                         | 3.046083761 |                              |                     |
| ENSG00000100220                              | 1654.392201                         | 1536.570824 | 1574.243002                  |                     |
| 1728.044436                                  | 1997.561427                         | 2132.530814 | 1588.402009                  |                     |
| 1952.712226                                  | -0.298206524                        | 0.036662164 | 1                            | RTCB 22             |
| 32387582                                     | 32412255                            | -           | 2948                         | protein_coding      |
| "RNA 2',3'-cyclic phosphate and 5'-OH ligase | [Source:HGNC                        |             |                              |                     |
| Symbol;Acc:HGNC:26935]"                      | -                                   | 1720        | 1766                         | 1692 1568 1648      |
| 2310                                         | 28.20994141                         | 26.10488701 | 26.79285016                  |                     |
| 29.5549768                                   | 34.36189357                         | 36.43472692 |                              |                     |
| ENSG00000273391                              | 0                                   | 0           | 0                            | 13.22482987 0       |
| 12.92442918                                  | 0                                   | 8.716419681 | -5.689146057                 | 0.036663471         |
| 1                                            | AC083880.1                          | 7           | 139359032                    | 139359566           |
| -                                            | 535                                 | antisense   | "novel transcript, antisense |                     |
| to LUC7L2"                                   | -                                   | 0           | 0                            | 12 0 14             |
| 0                                            | 0                                   | 0           | 1.246348535                  | 0 1.216760974       |
| ENSG00000117152                              | 481.8898214                         | 301.0495499 | 570.3374468                  |                     |
| 1041.455352                                  | 712.7221596                         | 391.4255694 | 451.0922727                  |                     |
| 715.201027                                   | -0.664502101                        | 0.036710377 | 1                            | RGS4 1              |
| 163068775                                    | 163076802                           | +           | 4836                         | protein_coding      |
| regulator of G protein signaling 4           | [Source:HGNC                        |             |                              |                     |
| Symbol;Acc:HGNC:10000]                       | -                                   | 501         | 346                          | 613 945 588         |
| 424                                          | 5.009018667                         | 3.117801089 | 5.917254085                  |                     |
| 10.85819308                                  | 7.473747034                         | 4.07671717  |                              |                     |
| ENSG00000268043                              | 690.6125584                         | 600.3589289 | 640.1177217                  |                     |
| 466.1752527                                  | 385.4517802                         | 557.5968017 | 643.696403                   |                     |
| 469.7412782                                  | 0.452783498                         | 0.03671215  | 1                            | NBPF12 1            |
| 146938744                                    | 146996202                           | +           | 7272                         | protein_coding      |
| NBPF member 12                               | [Source:HGNC Symbol;Acc:HGNC:24297] | -           |                              |                     |
| 718                                          | 690                                 | 688         | 423                          | 318 604 4.773883215 |
| 4.134793437                                  | 4.416524092                         | 3.232202343 | 2.687946435                  |                     |
| 3.862016159                                  |                                     |             |                              |                     |
| ENSG00000115685                              | 1074.393075                         | 1049.322998 | 1155.561352                  |                     |
| 1472.364392                                  | 1303.020955                         | 1308.136868 | 1093.092475                  |                     |

|                                                              |                          |                       |         |                             |      |                |
|--------------------------------------------------------------|--------------------------|-----------------------|---------|-----------------------------|------|----------------|
| 1361.174071                                                  | -0.316436146             | 0.036734026           | 1       | PPP1R7                      | 2    |                |
| 241149576                                                    | 241183652                | +                     | 3781    | protein_coding              |      |                |
| protein phosphatase 1 regulatory subunit 7 [Source:HGNC      |                          |                       |         |                             |      |                |
| Symbol;Acc:HGNC:9295]                                        | -                        | 1117                  | 1206    | 1242                        | 1336 | 1075           |
| 1417                                                         | 14.28392997              | 13.89950161           |         | 15.33419403                 |      |                |
| 19.63413733                                                  | 17.47628615              | 17.42585881           |         |                             |      |                |
| ENSG00000207475                                              | 6.732991517              | 6.09059783            |         | 10.23444032                 |      | 0              |
| 0                                                            | 0                        | 7.686009888           | 0       | 5.283937231                 |      |                |
| 0.036755899                                                  | 1                        | SNORA80E              | 1       | 155919909                   |      |                |
| 155920045                                                    | -                        | 137                   | snoRNA  | "small nucleolar RNA, H/ACA |      |                |
| box 80E [Source:HGNC                                         | Symbol;Acc:HGNC:32635]"  | -                     | 7       | 7                           |      |                |
| 11                                                           | 0                        | 0                     | 0       | 2.470464908                 |      | 2.226568551    |
| 3.748160278                                                  | 0                        | 0                     | 0       |                             |      |                |
| ENSG00000273165                                              | 8.656703379              | 7.830768638           |         | 6.512825656                 |      | 0              |
| 0                                                            | 0                        | 7.666765891           | 0       | 5.280420658                 |      |                |
| 0.036763132                                                  | 1                        | AL121652.1            | 2       | 31852976                    |      |                |
| 31853423                                                     | -                        | 448                   | lincRNA | novel transcript            |      | -              |
| 9                                                            | 9                        | 7                     | 0       | 0                           |      | 0.971327561    |
| 0.875433362                                                  | 0.729400509              | 0                     | 0       | 0                           |      | 0              |
| ENSG00000160803                                              | 2937.508013              | 2451.030584           |         | 3007.064646                 |      |                |
| 3092.40605                                                   | 3570.883473              | 3520.983778           |         | 2798.534414                 |      |                |
| 3394.757767                                                  | -0.278769234             | 0.036788777           |         | 0.235345624                 |      | UBQLN4         |
| 1                                                            | 156035301                | 156053794             |         | -                           |      | 3878           |
| protein_coding                                               | ubiquilin 4 [Source:HGNC | Symbol;Acc:HGNC:1237] | -       |                             |      |                |
| 3054                                                         | 2817                     | 3232                  | 2806    | 2946                        | 3814 | 38.07697549    |
| 31.65465904                                                  | 38.90537298              | 40.20609603           |         | 46.69520625                 |      |                |
| 45.73028438                                                  |                          |                       |         |                             |      |                |
| ENSG00000170385                                              | 857.0136345              | 937.0819804           |         | 878.3010599                 |      |                |
| 975.3312025                                                  | 1586.655284              | 1027.49212            |         | 890.7988916                 |      |                |
| 1196.492869                                                  | -0.424736564             | 0.036831835           |         | 1                           |      | SLC30A1 1      |
| 211571568                                                    | 211578742                | -                     |         | 5474                        |      | protein_coding |
| solute carrier family 30 member 1 [Source:HGNC               |                          |                       |         |                             |      |                |
| Symbol;Acc:HGNC:11012]                                       | -                        | 891                   | 1077    | 944                         | 885  | 1309           |
| 1113                                                         | 7.869989038              | 8.57372418            |         | 8.050321727                 |      |                |
| 8.983602375                                                  | 14.69881127              | 9.454126072           |         |                             |      |                |
| ENSG00000164211                                              | 366.4671097              | 557.7247441           |         | 547.0773551                 |      |                |
| 1006.189139                                                  | 621.8137209              | 537.2869844           |         | 490.4230696                 |      |                |
| 721.7632814                                                  | -0.55678949              | 0.036864961           |         | 1                           |      | STARD4 5       |
| 111496033                                                    | 111512590                | -                     |         | 5684                        |      | protein_coding |
| StAR related lipid transfer domain containing 4 [Source:HGNC |                          |                       |         |                             |      |                |
| Symbol;Acc:HGNC:18058]                                       | -                        | 381                   | 641     | 588                         | 913  | 513            |
| 582                                                          | 3.240948447              | 4.914310104           |         | 4.829134402                 |      |                |
| 8.925421854                                                  | 5.547670468              | 4.761019207           |         |                             |      |                |
| ENSG00000197933                                              | 102.9185846              | 87.87862583           |         | 93.04036652                 |      |                |
| 191.760033                                                   | 162.4230772              | 136.6296799           |         | 94.61252565                 |      |                |
| 163.6042634                                                  | -0.789612794             | 0.037009969           |         | 1                           |      | ZNF823 19      |
| 11721265                                                     | 11739009                 | -                     |         | 2459                        |      | protein_coding |
| zinc finger protein 823 [Source:HGNC                         |                          |                       |         |                             |      |                |
| Symbol;Acc:HGNC:30936]                                       | -                        | 100                   | 174     | 134                         | 148  |                |
| zf-C2H2                                                      | 107                      | 101                   | 100     | 174                         | 134  | 148            |
| 2.103906646                                                  | 1.78986981               | 1.898399047           |         | 3.93190271                  |      |                |

|                        |                                                 |                      |                      |                |      |      |  |
|------------------------|-------------------------------------------------|----------------------|----------------------|----------------|------|------|--|
| 3.34960526             | 2.798557309                                     |                      |                      |                |      |      |  |
| ENSG00000235109        | 93.3000253                                      | 69.60683234          | 66.05866023          |                |      |      |  |
| 122.3296763            | 173.3320898                                     | 125.5515977          | 76.32183929          |                |      |      |  |
| 140.4044546            | -0.878799231                                    | 0.037010185          | 1                    | ZSCAN31        | 6    |      |  |
| 28324693               | 28356271                                        | -                    | 4957                 | protein_coding |      |      |  |
|                        | zinc finger and SCAN domain containing 31       |                      |                      |                |      |      |  |
| Symbol;Acc:HGNC:14097] | zf-C2H2                                         | 97                   | 80                   | 71             | 111  | 143  |  |
| 136                    | 0.946137012                                     | 0.703282265          | 0.668629395          |                |      |      |  |
| 1.244274221            | 1.773227585                                     | 1.275707203          |                      |                |      |      |  |
| ENSG00000151725        | 456.8815672                                     | 775.2460952          | 597.3191531          |                |      |      |  |
| 889.3698084            | 831.5091862                                     | 790.2365269          | 609.8156051          |                |      |      |  |
| 837.0385072            | -0.456212487                                    | 0.037022254          | 1                    | CENPU          | 4    |      |  |
| 184694618              | 184734133                                       | -                    | 2953                 | protein_coding |      |      |  |
|                        | centromere protein U                            |                      |                      |                |      |      |  |
|                        |                                                 |                      |                      |                |      |      |  |
| -                      | 475                                             | 891                  | 642                  | 807            | 686  | 856  |  |
| 7.777345262            | 13.1483984                                      | 10.1488683           | 15.18525647          |                |      |      |  |
| 14.27933653            | 13.47849295                                     |                      |                      |                |      |      |  |
| ENSG00000105669        | 2778.801785                                     | 2019.468223          | 2842.383197          |                |      |      |  |
| 2665.905287            | 3387.854483                                     | 3648.381722          | 2546.884402          |                |      |      |  |
| 3234.047164            | -0.344888428                                    | 0.037027044          | 0.235872734          | COPE           |      |      |  |
| 19                     | 18899514                                        | 18919397             | -                    | 2885           |      |      |  |
| protein_coding         | coatomer protein complex subunit epsilon        |                      |                      |                |      |      |  |
| Symbol;Acc:HGNC:2234]  | -                                               | 2889                 | 2321                 | 3055           | 2419 | 2795 |  |
| 3952                   | 48.41756462                                     | 35.05806329          | 49.43237             |                |      |      |  |
| 46.59100671            | 59.5502179                                      | 63.69452989          |                      |                |      |      |  |
| ENSG00000274756        | 0                                               | 10.44102485          | 17.67766964          | 0              | 0    |      |  |
| 0                      | 9.372898163                                     | 0                    | 5.570805521          | 0.037031488    |      |      |  |
| 1                      | AC243732.1                                      | 17                   | 36574462             | 36575325       |      |      |  |
| -                      | 864                                             | processed_pseudogene | ribosomal protein S2 |                |      |      |  |
| (RPS2) pseudogene      | -                                               | 0                    | 12                   | 19             | 0    | 0    |  |
| 0                      | 0                                               | 0.60523788           | 1.026563679          | 0              | 0    |      |  |
| 0                      |                                                 |                      |                      |                |      |      |  |
| ENSG00000065802        | 2217.077921                                     | 1887.215242          | 2166.910136          |                |      |      |  |
| 1679.553393            | 1700.59386                                      | 1770.646797          | 2090.4011            |                |      |      |  |
| 1716.93135             | 0.283673294                                     | 0.03707735           | 1                    | ASB1           | 2    |      |  |
| 238426742              | 238452250                                       | +                    | 7410                 | protein_coding |      |      |  |
|                        | ankyrin repeat and SOCS box containing 1        |                      |                      |                |      |      |  |
| Symbol;Acc:HGNC:16011] | -                                               | 2305                 | 2169                 | 2329           | 1524 | 1403 |  |
| 1918                   | 15.04021132                                     | 12.7555721           | 14.67227021          |                |      |      |  |
| 11.42822554            | 11.63822699                                     | 12.0354245           |                      |                |      |      |  |
| ENSG00000159433        | 716.5826686                                     | 408.94014            | 489.3923279          |                |      |      |  |
| 461.7669761            | 338.179392                                      | 275.1057068          | 538.3050455          |                |      |      |  |
| 358.3506917            | 0.587485584                                     | 0.037125106          | 1                    | STARD9         | 15   |      |  |
| 42575659               | 42720981                                        | +                    | 20706                | protein_coding |      |      |  |
|                        | StAR related lipid transfer domain containing 9 |                      |                      |                |      |      |  |
| Symbol;Acc:HGNC:19162] | -                                               | 745                  | 470                  | 526            | 419  | 279  |  |
| 298                    | 1.739647589                                     | 0.989145651          | 1.185865871          |                |      |      |  |
| 1.124423353            | 0.828238384                                     | 0.669192512          |                      |                |      |      |  |
| ENSG00000138356        | 1299.467363                                     | 1214.639224          | 1387.231865          |                |      |      |  |
| 2208.546587            | 1362.414468                                     | 1536.160725          | 1300.446151          |                |      |      |  |

|                                      |                                                      |             |                      |                |             |                     |
|--------------------------------------|------------------------------------------------------|-------------|----------------------|----------------|-------------|---------------------|
| 1702.373927                          | -0.388649179                                         | 0.037170402 | 1                    | AOX1           | 2           |                     |
| 200585868                            | 200677064                                            | +           | 5556                 | protein_coding |             |                     |
|                                      | aldehyde oxidase 1 [Source:HGNC Symbol;Acc:HGNC:553] |             |                      |                |             | -                   |
| 1351                                 | 1396                                                 | 1491        | 2004                 | 1124           | 1664        | 11.75694072         |
| 10.94918463                          | 12.52741435                                          | 20.0422984  |                      |                |             | 12.43516163         |
| 13.92586251                          |                                                      |             |                      |                |             |                     |
| ENSG00000275468                      | 31.74124572                                          | 4.350427021 | 0                    | 0              | 0           |                     |
| 0.923173513                          | 12.03055758                                          | 0.307724504 |                      |                |             | 4.967540765         |
| 0.037189181                          | 1                                                    | AC004678.1  | 19                   |                |             | 2013728             |
| 2014656                              | -                                                    | 929         | processed_pseudogene | novel          | pseudogene  |                     |
| -                                    | 33                                                   | 5           | 0                    | 0              | 0           | 1                   |
| 1.717510664                          | 0.234537822                                          | 0           | 0                    | 0              | 0           | 0.050051293         |
| ENSG00000084623                      | 8986.619963                                          | 8683.452334 | 8560.644123          |                |             |                     |
| 9433.71197                           | 10490.83383                                          | 10506.63775 | 8743.57214           |                |             |                     |
| 10143.72785                          | -0.214319079                                         | 0.037247611 | 0.235872734          |                |             | EIF3I               |
| 1                                    | 32221928                                             | 32231604    | +                    |                | 1725        |                     |
| protein_coding                       | eukaryotic translation initiation factor 3 subunit I |             |                      |                |             |                     |
| [Source:HGNC Symbol;Acc:HGNC:3272]   |                                                      | -           | 9343                 | 9980           | 9201        |                     |
| 8560                                 | 8655                                                 | 11381       | 261.8776686          | 252.1157861    |             |                     |
| 248.9957688                          | 275.7380557                                          | 308.4077856 | 306.7766793          |                |             |                     |
| ENSG00000149547                      | 3794.521648                                          | 3797.92279  | 3142.903581          |                |             |                     |
| 3957.530337                          | 4345.423371                                          | 4618.637084 | 3578.449339          |                |             |                     |
| 4307.196931                          | -0.267507101                                         | 0.037256587 | 0.235872734          |                |             | EI24                |
| 11                                   | 125569216                                            | 125584687   | +                    |                | 3558        |                     |
| protein_coding                       | "EI24, autophagy associated transmembrane protein    |             |                      |                |             |                     |
| [Source:HGNC Symbol;Acc:HGNC:13276]" |                                                      | -           | 3945                 | 4365           | 3378        |                     |
| 3591                                 | 3585                                                 | 5003        | 53.60956463          | 53.46097833    |             |                     |
| 44.31999853                          | 56.08174328                                          | 61.93420631 | 65.38160496          |                |             |                     |
| ENSG00000275708                      | 28.85567793                                          | 18.27179349 | 2.791210996          |                |             | 0                   |
| 0                                    | 3.692694051                                          | 16.6395608  | 1.230898017          |                |             |                     |
| 3.691038164                          | 0.037338292                                          | 1           | MIR3648-1            | 21             |             |                     |
| 8208473                              | 8208652                                              | +           | 180                  | miRNA          | microRNA    | 3648-1 [Source:HGNC |
| Symbol;Acc:HGNC:38941]               |                                                      | -           | 30                   | 21             | 3           | 0                   |
| 4                                    | 8.058421249                                          | 5.083998191 | 0.778027209          |                |             | 0                   |
| 0                                    | 1.033281144                                          |             |                      |                |             |                     |
| ENSG00000264187                      | 0                                                    | 0           | 0                    | 0              | 32.72703794 | 0                   |
| 0                                    | 10.90901265                                          | -6.00690402 | 0.037362604          |                |             | 1                   |
| AC055811.2                           | 17                                                   | 17202649    | 17237185             |                |             | -                   |
| 1693                                 | protein_coding                                       | novel       | transcript           |                | -           | 0                   |
| 0                                    | 0                                                    | 0           | 27                   | 0              | 0           | 0                   |
| 0                                    | 0.980289083                                          | 0           |                      |                |             |                     |
| ENSG00000225216                      | 0                                                    | 13.05128106 | 14.88645864          | 0              | 0           |                     |
| 0                                    | 9.312579902                                          | 0           | 5.56170657           | 0.037482817    |             |                     |
| 1                                    | AC007362.1                                           | 2           | 205756469            | 205764006      |             |                     |
| -                                    | 1623                                                 | antisense   | novel                | transcript     |             | -                   |
| 0                                    | 15                                                   | 16          | 0                    | 0              | 0           | 0                   |
| 0.402746094                          | 0.460200937                                          | 0           | 0                    | 0              |             |                     |
| ENSG00000076242                      | 598.274389                                           | 790.9076325 | 833.641684           |                |             |                     |
| 1247.542284                          | 951.5083253                                          | 817.9317323 | 740.9412352          |                |             |                     |
| 1005.660781                          | -0.440099233                                         | 0.037543519 | 1                    | MLH1           | 3           |                     |



|                                                                 |              |                                        |             |                     |
|-----------------------------------------------------------------|--------------|----------------------------------------|-------------|---------------------|
| 36993332                                                        | 37050918     | +                                      | 3532        | protein_coding      |
| mutL homolog 1 [Source:HGNC Symbol;Acc:HGNC:7127]               |              |                                        |             |                     |
| 622                                                             | 909          | 896                                    | 1132        | 785 886 8.514730493 |
| 11.21506477                                                     | 11.84222615  | 17.8089279                             | 13.66143506 |                     |
| 11.66390692                                                     |              |                                        |             |                     |
| ENSG00000256616                                                 | 4.809279655  | 9.570939447                            | 0.930403665 |                     |
| 31.96000551                                                     | 21.81802529  | 24.92568484                            | 5.103540922 |                     |
| 26.23457188                                                     | -2.356917038 | 0.037571934                            | 1           | AP002414.2          |
| 18                                                              | 12073232     | 12076654                               | -           | 3423                |
| transcribed_processed_pseudogene G protein-coupled receptor 125 |              |                                        |             |                     |
| (GPR125) pseudogene - 5 11 1 29 18                              |              |                                        |             |                     |
| 27                                                              | 0.070625953  | 0.140037511                            | 0.013637637 |                     |
| 0.47076389                                                      | 0.32323097   | 0.366764999                            |             |                     |
| ENSG00000272078                                                 | 0            | 0                                      | 0           | 32.31107295         |
| 0                                                               | 10.77035765  | -5.996070587                           | 0.037611741 | 1                   |
| AL139423.1                                                      | 1            | 10639241                               | 10654333    | +                   |
| 7923                                                            | antisense    | "novel transcript, antisense to CASZ1" |             |                     |
| -                                                               | 0            | 0                                      | 0           | 35 0                |
| 0                                                               | 0            | 0                                      | 0.205404241 |                     |
| ENSG00000143418                                                 | 3883.012393  | 3650.008271                            | 3569.02846  |                     |
| 4028.062763                                                     | 4768.450639  | 4383.227838                            | 3700.683041 |                     |
| 4393.24708                                                      | -0.247421538 | 0.037644222                            | 0.23652823  | CERS2               |
| 1                                                               | 150960583    | 150975004                              | -           | 4644                |
| protein_coding ceramide synthase 2 [Source:HGNC                 |              |                                        |             |                     |
| Symbol;Acc:HGNC:14076] - 4037 4195 3836 3655 3934               |              |                                        |             |                     |
| 4748                                                            | 42.03080954  | 39.36392103                            | 38.5595914  |                     |
| 43.73279294                                                     | 52.07023104  | 47.53894258                            |             |                     |
| ENSG00000153774                                                 | 930.1146852  | 807.4392551                            | 923.8908395 |                     |
| 739.4884033                                                     | 647.2680837  | 674.8398378                            | 887.14826   |                     |
| 687.1987749                                                     | 0.368184561  | 0.037647237                            | 1           | CFDP1 16            |
| 75293698                                                        | 75433485     | -                                      | 3317        | protein_coding      |
| craniofacial development protein 1 [Source:HGNC                 |              |                                        |             |                     |
| Symbol;Acc:HGNC:1873] - 967 928 993 671 534                     |              |                                        |             |                     |
| 731                                                             | 14.09555625  | 12.19161115                            | 13.97493552 |                     |
| 11.24058961                                                     | 9.8956231    | 10.24714599                            |             |                     |
| ENSG00000229932                                                 | 6.732991517  | 6.09059783                             | 17.67766964 |                     |
| 27.55172889                                                     | 31.51492542  | 52.62089023                            | 10.16708633 |                     |
| 37.22918151                                                     | -1.875698323 | 0.037698015                            | 1           | YWHAZP3 10          |
| 23136924                                                        | 23137661     | +                                      | 738         |                     |
| processed_pseudogene tyrosine 3-monooxygenase/tryptophan 5-     |              |                                        |             |                     |
| monooxygenase activation protein zeta pseudogene 3 [Source:HGNC |              |                                        |             |                     |
| Symbol;Acc:HGNC:31101] - 7 7 19 25 26                           |              |                                        |             |                     |
| 57                                                              | 0.458609339  | 0.413333186                            | 1.201830648 |                     |
| 1.882329682                                                     | 2.165530707  | 3.591282026                            |             |                     |
| ENSG00000113328                                                 | 551.1434484  | 947.5230052                            | 707.1067855 |                     |
| 1019.413969                                                     | 1279.990817  | 793.9292209                            | 735.2577464 |                     |
| 1031.111336                                                     | -0.486659141 | 0.037725793                            | 1           | CCNG1 5             |
| 163437569                                                       | 163446151    | +                                      | 3096        | protein_coding      |
| cyclin G1 [Source:HGNC Symbol;Acc:HGNC:1592] - 573              |              |                                        |             |                     |
| 1089                                                            | 760          | 925                                    | 1056        | 860 8.948595689     |

|                                                |                                           |                |                                      |                |
|------------------------------------------------|-------------------------------------------|----------------|--------------------------------------|----------------|
| 15.32800119                                    | 11.45931549                               | 16.60171004    | 20.96574631                          |                |
| 12.91601431                                    |                                           |                |                                      |                |
| ENSG00000092820                                | 2075.685099                               | 2395.345118    | 2719.569913                          |                |
| 3211.429519                                    | 2867.858214                               | 2745.518027    | 2396.86671                           |                |
| 2941.60192                                     | -0.295291481                              | 0.037744186    | 0.23652823                           | EZR            |
| 6                                              | 158765741                                 | 158819412      | -                                    | 3342           |
| protein_coding                                 | ezrin [Source:HGNC Symbol;Acc:HGNC:12691] |                |                                      | -              |
| 2158                                           | 2753                                      | 2923           | 2914                                 | 2366           |
| 35.89701724                                    | 40.82896827                               | 48.45015218    | 31.22095701                          | 43.51667002    |
| 41.37762285                                    |                                           |                |                                      |                |
| ENSG00000131043                                | 3145.268894                               | 2666.811764    | 2836.800775                          |                |
| 2771.703926                                    | 3934.517228                               | 4157.973501    | 2882.960478                          |                |
| 3621.398218                                    | -0.329189284                              | 0.037746608    | 0.23652823                           | AAR2           |
| 20                                             | 36236459                                  | 36270918       | +                                    | 3101           |
| protein_coding                                 | AAR2 splicing factor homolog [Source:HGNC |                |                                      |                |
| Symbol;Acc:HGNC:15886]                         | -                                         | 3270           | 3065                                 | 3049           |
| 4504                                           | 50.98556108                               | 43.07123358    | 45.89883833                          | 2515           |
| 45.06592263                                    | 64.34193379                               | 67.53480244    |                                      | 3246           |
| ENSG00000267508                                | 117.3464236                               | 100.9299069    | 117.2308618                          |                |
| 60.61380355                                    | 72.72675098                               | 27.69520538    | 111.8357308                          |                |
| 53.67858664                                    | 1.064608426                               | 0.037810559    | 1                                    | ZNF285 19      |
| 44382298                                       | 44401608                                  | -              | 6866                                 | protein_coding |
| zinc finger protein 285                        | [Source:HGNC Symbol;Acc:HGNC:13079]       |                |                                      |                |
| zf-C2H2                                        | 122                                       | 116            | 126                                  | 55             |
| 0.859126763                                    | 0.736228776                               | 0.856668468    | 0.445113672                          | 60             |
| 0.537149049                                    | 0.203164804                               |                |                                      | 30             |
| ENSG00000090889                                | 724.277516                                | 811.7896822    | 667.0994279                          |                |
| 1469.058184                                    | 911.5086123                               | 728.3839015    | 734.3888754                          |                |
| 1036.316899                                    | -0.496287733                              | 0.037818245    | 1                                    | KIF4A X        |
| 70290090                                       | 70420832                                  | +              | 4533                                 | protein_coding |
| kinesin family member 4A                       | [Source:HGNC Symbol;Acc:HGNC:13339]       |                |                                      |                |
| -                                              | 753                                       | 933            | 717                                  | 1333           |
| 8.031755394                                    | 8.969216815                               | 7.38379231     | 16.34016637                          | 752            |
| 10.19716582                                    | 8.093237819                               |                |                                      | 789            |
| ENSG00000232850                                | 6.732991517                               | 9.570939447    | 6.512825656                          | 0              |
| 0                                              | 0                                         | 7.60558554     | 0                                    | 5.269236842    |
| 0.037875096                                    | 1                                         | PTGES2-AS1     | 9                                    | 128128529      |
| 128130628                                      | +                                         | 2100           | lincRNA PTGES2 antisense RNA 1 (head |                |
| to head) [Source:NCBI gene;Acc:389791]         | -                                         |                | 7                                    | 11             |
| 0                                              | 0                                         | 0              | 0.161168425                          | 0.228261143    |
| 0.155605442                                    | 0                                         | 0              | 0                                    |                |
| ENSG00000268182                                | 4.809279655                               | 6.960683234    | 11.16484398                          | 0              |
| 0                                              | 0                                         | 7.644935624    | 0                                    | 5.27645934     |
| 0.037876516                                    | 1                                         | SMIM17 19      | 56643145                             | 56655766       |
| +                                              | 1076                                      | protein_coding | small integral membrane              |                |
| protein 17 [Source:HGNC Symbol;Acc:HGNC:27114] | -                                         |                | 5                                    | 8              |
| 12                                             | 0                                         | 0              | 0.224677172                          | 0.323993512    |
| 0.520613002                                    | 0                                         | 0              | 0                                    |                |
| ENSG00000095066                                | 360.6959741                               | 341.0734785    | 398.2127687                          |                |
| 218.2096928                                    | 317.5734793                               | 201.2518258    | 366.6607404                          |                |

|                                                               |              |             |             |                |              |
|---------------------------------------------------------------|--------------|-------------|-------------|----------------|--------------|
| 245.6783326                                                   | 0.579800633  | 0.037903188 | 1           | HOOK2          | 19           |
| 12763003                                                      | 12872740     | -           | 5950        | protein_coding |              |
| hook microtubule tethering protein 2 [Source:HGNC             |              |             |             |                |              |
| Symbol;Acc:HGNC:19885]                                        | -            | 375         | 392         | 428            | 198          |
| 218                                                           | 3.047302153  | 2.870963684 | 3.357939283 |                | 262          |
| 1.849099445                                                   | 2.706647417  | 1.703611433 |             |                |              |
| ENSG00000100280                                               | 865.6703379  | 858.774294  | 974.1326375 |                |              |
| 1054.680182                                                   | 1021.810851  | 1443.843374 | 899.5257564 |                |              |
| 1173.444802                                                   | -0.38446898  | 0.037937133 | 1           | AP1B1          | 22           |
| 29327680                                                      | 29423179     | -           | 6721        | protein_coding |              |
| adaptor related protein complex 1 subunit beta 1 [Source:HGNC |              |             |             |                |              |
| Symbol;Acc:HGNC:554]                                          | -            | 900         | 987         | 1047           | 957          |
| 1564                                                          | 6.4745536    | 6.399438283 | 7.272082917 |                | 843          |
| 7.912069364                                                   | 7.709763204  | 10.8201647  |             |                |              |
| ENSG00000239672                                               | 1471.639574  | 1242.481957 | 1424.448011 |                |              |
| 1559.427855                                                   | 1812.108212  | 1751.260154 | 1379.523181 |                |              |
| 1707.59874                                                    | -0.307939831 | 0.037975933 | 1           | NME1           | 17           |
| 51153536                                                      | 51162428     | +           | 3438        | protein_coding |              |
| NME/NM23 nucleoside diphosphate kinase 1 [Source:HGNC         |              |             |             |                |              |
| Symbol;Acc:HGNC:7849]                                         | -            | 1530        | 1428        | 1531           | 1415         |
| 1897                                                          | 21.51725045  | 18.10009827 | 20.78812666 |                | 1495         |
| 22.86981288                                                   | 26.72899812  | 25.65620852 |             |                |              |
| ENSG00000273416                                               | 13.46598303  | 0           | 4.652018326 | 41.87862791    |              |
| 39.99971304                                                   | 16.61712323  | 6.039333786 | 32.83182139 |                |              |
| -2.448354678                                                  | 0.03799812   | 1           | AL732292.2  | 1              |              |
| 235104180                                                     | 235104609    | -           | 430         | lincRNA novel  |              |
| transcript                                                    | -            | 14          | 0           | 5              | 38           |
| 1.574203221                                                   | 0            | 0.542809681 | 4.910516613 | 33             | 18           |
| 4.717292919                                                   | 1.946413319  |             |             |                |              |
| ENSG00000184995                                               | 55.78764399  | 35.67350157 | 66.05866023 |                |              |
| 12.12276071                                                   | 16.96957523  | 25.84885836 | 52.50660193 |                |              |
| 18.31373143                                                   | 1.513681882  | 0.038028994 | 1           | IFNE           | 9            |
| 21480839                                                      | 21482313     | -           | 1475        | protein_coding |              |
| interferon epsilon [Source:HGNC Symbol;Acc:HGNC:18163]        |              |             |             |                |              |
| 58                                                            | 41           | 71          | 11          | 14             | 28           |
| 1.211296421                                                   | 2.247048076  | 0.414393284 | 0.583422771 |                | 1.901241081  |
| 0.882667283                                                   |              |             |             |                |              |
| ENSG00000115738                                               | 162.5536523  | 154.875202  | 143.2821644 |                |              |
| 224.8221077                                                   | 192.7258901  | 322.1875559 | 153.5703396 |                |              |
| 246.5785179                                                   | -0.68517672  | 0.038083542 | 1           | ID2            | 2            |
| 8678845                                                       | 8684453      | +           | 2205        | protein_coding | inhibitor of |
| DNA binding 2 [Source:HGNC Symbol;Acc:HGNC:5361]              |              |             |             |                |              |
| 178                                                           | 154          | 204         | 159         | 349            | bHLH         |
| 3.51779078                                                    | 3.260304496  | 5.140834435 | 4.432368816 |                | 169          |
| 7.359492233                                                   |              |             |             |                |              |
| ENSG00000102032                                               | 20.19897455  | 63.51623451 | 39.07695394 |                |              |
| 16.53103733                                                   | 1.212112516  | 12.00125567 | 40.930721   |                |              |
| 9.914801838                                                   | 2.037765024  | 0.038132811 | 1           | RENBP          | X            |
| 153935263                                                     | 153944691    | -           | 2057        | protein_coding |              |
| renin binding protein [Source:HGNC Symbol;Acc:HGNC:9959]      |              |             |             |                |              |

|                                                    |                                          |                      |             |                      |                |            |
|----------------------------------------------------|------------------------------------------|----------------------|-------------|----------------------|----------------|------------|
| -                                                  | 21                                       | 73                   | 42          | 15                   | 1              | 13         |
| 0.49361258                                         | 1.546490178                              |                      | 0.953149522 |                      | 0.405199603    |            |
| 0.029882234                                        | 0.293859732                              |                      |             |                      |                |            |
| ENSG00000187961                                    | 567.4949993                              |                      | 423.7315919 |                      | 701.5243636    |            |
| 348.2538531                                        | 379.3912176                              |                      | 454.2013683 |                      | 564.2503182    |            |
| 393.948813                                         | 0.517184847                              |                      | 0.038139327 |                      | 1              | KLHL17 1   |
| 960587                                             | 965715                                   | +                    | 3395        | protein_coding       |                | kelch like |
| family member 17                                   | [Source:HGNC Symbol;Acc:HGNC:24023]      |                      |             | -                    |                | 590        |
| 487                                                | 754                                      | 316                  | 313         | 492                  | 8.402595352    |            |
| 6.250975264                                        | 10.36758496                              |                      | 5.172009902 |                      | 5.666983121    |            |
| 6.738393089                                        |                                          |                      |             |                      |                |            |
| ENSG00000186326                                    | 12.5041271                               |                      | 9.570939447 |                      | 50.24179792    |            |
| 6.612414933                                        | 3.636337549                              |                      | 0           | 24.10562149          | 3.416250827    |            |
| 2.836844796                                        | 0.038249439                              |                      | 1           | RGS9BP               | 19             |            |
| 32675407                                           | 32678300                                 | +                    | 2894        | protein_coding       |                |            |
| regulator of G protein signaling 9 binding protein | [Source:HGNC                             |                      |             |                      |                |            |
| Symbol;Acc:HGNC:30304]                             | -                                        | 13                   | 11          | 54                   | 6              | 3          |
| 0                                                  | 0.217193109                              |                      | 0.165635246 |                      | 0.871046357    |            |
| 0.11520326                                         | 0.063719167                              |                      | 0           |                      |                |            |
| ENSG00000203280                                    | 0                                        | 15.66153728          |             | 12.09524765          | 0              | 0          |
| 0                                                  | 9.252261641                              |                      | 0           | 5.552547875          | 0.038265882    |            |
| 1                                                  | AL022323.1                               |                      | 22          | 25102433             | 25112692       |            |
| -                                                  | 957                                      | antisense            |             | uncharacterized      | LOC100128531   |            |
| [Source:NCBI gene;Acc:100128531]                   | -                                        | 0                    |             | 18                   | 13             |            |
| 0                                                  | 0                                        | 0                    | 0           | 0.819632489          | 0.63412876     |            |
| 0                                                  | 0                                        | 0                    |             |                      |                |            |
| ENSG00000204625                                    | 23.08454234                              |                      | 5.220512425 |                      | 0              | 0          |
| 0                                                  | 9.435018256                              |                      | 0           | 5.579001901          | 0.038271038    |            |
| 1                                                  | HCG9                                     | 6                    | 29975112    | 29978410             |                | +          |
| 700                                                | lincRNA HLA complex group 9 [Source:HGNC |                      |             |                      |                |            |
| Symbol;Acc:HGNC:21243]                             | -                                        | 24                   | 6           | 0                    | 0              | 0          |
| 0                                                  | 1.657732371                              |                      | 0.373518234 |                      | 0              | 0          |
| 0                                                  |                                          |                      |             |                      |                |            |
| ENSG00000231058                                    | 23.08454234                              |                      | 5.220512425 |                      | 0              | 0          |
| 0                                                  | 9.435018256                              |                      | 0           | 5.579001901          | 0.038271038    |            |
| 1                                                  | MSANTD2P1                                |                      | 21          | 23101223             | 23103074       |            |
| +                                                  | 1368                                     | processed_pseudogene |             | Myb/SANT DNA binding |                |            |
| domain containing 2 pseudogene 1                   | [Source:HGNC Symbol;Acc:HGNC:39637]      |                      |             |                      |                |            |
| -                                                  | 24                                       | 6                    | 0           | 0                    | 0              | 0          |
| 0.848254868                                        | 0.191127752                              |                      | 0           | 0                    | 0              | 0          |
| ENSG00000115128                                    | 1577.443727                              |                      | 1811.517812 |                      | 1831.034413    |            |
| 1817.312037                                        | 2204.832667                              |                      | 2506.416087 |                      | 1739.99865     |            |
| 2176.186931                                        | -0.322956674                             |                      | 0.038326048 |                      | 1              | SF3B6 2    |
| 24067584                                           | 24076443                                 |                      | -           | 1197                 | protein_coding |            |
| splicing factor 3b subunit 6                       | [Source:HGNC                             |                      |             |                      |                |            |
| Symbol;Acc:HGNC:30096]                             | -                                        | 1640                 | 2082        | 1968                 | 1649           | 1819       |
| 2715                                               | 66.2446659                               |                      | 75.79580547 |                      | 76.74975177    |            |
| 76.54882854                                        | 93.40839479                              |                      | 105.464598  |                      |                |            |
| ENSG00000140988                                    | 35199.11779                              |                      | 37969.65696 |                      | 45075.26637    |            |
| 41087.34225                                        | 47849.35369                              |                      | 52626.42927 |                      | 39414.68037    |            |

|                                                          |                                    |             |                |                        |
|----------------------------------------------------------|------------------------------------|-------------|----------------|------------------------|
| 47187.7084                                               | -0.259694064                       | 0.03840714  | 0.239012647    | RPS2                   |
| 16                                                       | 1962052                            | 1964860     | -              | 2413                   |
| protein_coding                                           |                                    |             |                |                        |
| ribosomal protein S2 [Source:HGNC Symbol;Acc:HGNC:10404] |                                    |             |                | -                      |
| 36595                                                    | 43639                              | 48447       | 37282          | 39476                  |
| 57006                                                    | 733.272919                         |             |                |                        |
| 788.090452                                               | 937.2503325                        | 858.5269326 | 1005.59517     |                        |
| 1098.485338                                              |                                    |             |                |                        |
| ENSG00000157353                                          | 394.3609317                        | 472.4563745 | 471.7146583    |                        |
| 155.3917509                                              | 368.482205                         | 330.4961176 | 446.1773215    |                        |
| 284.7900245                                              | 0.647904915                        | 0.038411371 | 1              | FUK                    |
| 16                                                       |                                    |             |                |                        |
| 70454421                                                 | 70480274                           | +           | 7405           | protein_coding         |
| fucokinase [Source:HGNC Symbol;Acc:HGNC:29500]           |                                    |             |                | -                      |
| 410                                                      |                                    |             |                |                        |
| 543                                                      | 507                                | 141         | 304            | 358                    |
| 2.677071745                                              |                                    |             |                |                        |
| 3.195459845                                              | 3.196163093                        | 1.058049761 | 2.523456839    |                        |
| 2.247962085                                              |                                    |             |                |                        |
| ENSG00000277452                                          | 10.58041524                        | 1.740170808 | 11.16484398    | 0                      |
| 0                                                        | 0                                  | 7.828476677 | 0              | 5.309640903            |
| 0.038422234                                              | 1                                  | RN7SL473P   | 1              | 150566562              |
| 150566860                                                | -                                  | 299         | misc_RNA       | "RNA, 7SL, cytoplasmic |
| 473, pseudogene [Source:HGNC Symbol;Acc:HGNC:46489]"     |                                    |             |                | -                      |
| 11                                                       |                                    |             |                |                        |
| 2                                                        | 12                                 | 0           | 0              | 0                      |
| 1.778781948                                              |                                    |             |                |                        |
| 0.291485802                                              | 1.873510337                        | 0           | 0              | 0                      |
| ENSG00000177954                                          | 7837.202125                        | 11831.42133 | 11288.58767    |                        |
| 10984.32327                                              | 13344.14669                        | 14216.8721  | 10319.07037    |                        |
| 12848.44735                                              | -0.316268718                       | 0.03844462  | 0.239012647    | RPS27                  |
| 1                                                        | 153990755                          | 153992155   | +              | 1035                   |
| protein_coding                                           | ribosomal protein S27 [Source:HGNC |             |                |                        |
| Symbol;Acc:HGNC:10416]                                   |                                    |             |                | -                      |
| 11009                                                    |                                    |             |                |                        |
| 15400                                                    | 380.6377759                        | 572.5234568 | 547.235022     |                        |
| 535.1014799                                              | 653.8150031                        | 691.8491141 |                |                        |
| ENSG00000171790                                          | 53.86393213                        | 52.20512425 | 36.28574294    |                        |
| 27.55172889                                              | 9.69690013                         | 6.462214589 | 47.45159978    |                        |
| 14.5702812                                               | 1.707641167                        | 0.038463875 | 1              | SLFNL1                 |
| 1                                                        |                                    |             |                |                        |
| 41015597                                                 | 41023237                           | -           | 4310           | protein_coding         |
| schlafen like 1 [Source:HGNC Symbol;Acc:HGNC:26313]      |                                    |             |                | -                      |
| 56                                                       | 60                                 | 39          | 25             | 8                      |
| 7                                                        |                                    |             |                |                        |
| 0.628220311                                              |                                    |             |                |                        |
| 0.606642144                                              | 0.422409204                        | 0.322310744 | 0.114093283    |                        |
| 0.075518227                                              |                                    |             |                |                        |
| ENSG00000184786                                          | 95.22373716                        | 40.894014   | 46.52018326    |                        |
| 19.8372448                                               | 21.81802529                        | 26.77203187 | 60.87931147    |                        |
| 22.80910065                                              | 1.413244632                        | 0.038470312 | 1              | TCTE3                  |
| 6                                                        |                                    |             |                |                        |
| 169740114                                                | 169751587                          | -           | 2626           | protein_coding         |
| t-complex-associated-testis-expressed 3 [Source:HGNC     |                                    |             |                |                        |
| Symbol;Acc:HGNC:11695]                                   |                                    |             |                | -                      |
| 18                                                       |                                    |             |                |                        |
| 29                                                       | 1.822811204                        | 0.779940969 | 0.888835349    |                        |
| 0.380881455                                              | 0.421332678                        | 0.513492724 |                |                        |
| ENSG00000268163                                          | 16.35155083                        | 4.350427021 | 2.791210996    | 0                      |
| 0                                                        | 0                                  | 7.831062948 | 0              | 5.310070029            |
| 0.038473518                                              | 1                                  | AC004076.1  | 19             | 57437970               |
| 57477536                                                 | -                                  | 1028        | protein_coding | novel transcript       |
| -                                                        | 17                                 | 5           | 3              | 0                      |
| 0                                                        |                                    |             |                | 0                      |

|                 |                         |             |                                    |             |                                                                |
|-----------------|-------------------------|-------------|------------------------------------|-------------|----------------------------------------------------------------|
| 0.79957098      | 0.211951009             | 0.136230445 | 0                                  | 0           | 0                                                              |
| ENSG00000260751 | 0                       | 2.610256213 | 6.512825656                        | 31.96000551 |                                                                |
|                 | 14.5453502              | 17.54029674 | 3.04102729                         | 21.34855081 |                                                                |
|                 | -2.809118841            | 0.038533615 | 1                                  | AC008870.2  | 16                                                             |
|                 | 23568673                | 23569696    | +                                  | 1024        | sense_intronic                                                 |
|                 | novel transcript        | -           | 0                                  | 3           | 7                                                              |
|                 | 12                      | 19          | 0                                  | 0.127667365 | 0.319112723                                                    |
| 1.573657025     | 0.720325268             | 0.862749393 |                                    |             |                                                                |
| ENSG00000210082 | 222960.1285             | 189874.3873 |                                    | 188540.7203 |                                                                |
| 213135.7664     | 286779.7608             | 420740.9443 |                                    | 200458.4121 |                                                                |
| 306885.4905     | -0.614400267            | 0.038533629 |                                    | 0.239012647 | MT-                                                            |
| RNR2            | MT                      | 1671        | 3229                               | +           | 1559                                                           |
|                 |                         |             |                                    |             | Mt_rRNA                                                        |
|                 | mitochondrially encoded | 16S RNA     | [Source:HGNC Symbol;Acc:HGNC:7471] |             |                                                                |
|                 | -                       | 231802      | 218225                             | 202644      | 193396                                                         |
|                 |                         |             |                                    | 236595      | 455755                                                         |
| 7189.062844     | 6099.81951              | 6067.833706 |                                    | 6893.081538 |                                                                |
| 9328.39242      | 13593.03217             |             |                                    |             |                                                                |
| ENSG00000124217 | 585.7702619             | 627.3315765 |                                    | 740.6013175 |                                                                |
| 662.3435624     | 924.8418499             | 1077.343489 |                                    | 651.2343853 |                                                                |
| 888.1763006     | -0.448190537            | 0.038574685 |                                    | 1           | MOCS3                                                          |
|                 | 50958826                | 50963931    | +                                  | 5106        | protein_coding                                                 |
|                 |                         |             |                                    |             | molybdenum cofactor synthesis 3 [Source:HGNC                   |
|                 | Symbol;Acc:HGNC:15765]  | -           | 609                                | 721         | 796                                                            |
|                 |                         |             |                                    |             | 601                                                            |
|                 |                         |             |                                    |             | 763                                                            |
|                 | 1167                    | 5.766837298 | 6.153370314                        | 7.277434296 |                                                                |
| 6.540421013     | 9.185252251             | 10.62725407 |                                    |             |                                                                |
| ENSG00000100299 | 182.7526269             | 58.29572208 |                                    | 86.52754086 |                                                                |
| 58.40966524     | 58.18140078             | 12.92442918 |                                    | 109.1919633 |                                                                |
| 43.17183173     | 1.343863304             | 0.038598041 |                                    | 1           | ARSA                                                           |
|                 | 50622754                | 50628173    | -                                  | 2932        | protein_coding                                                 |
|                 |                         |             |                                    |             | arylsulfatase A [Source:HGNC Symbol;Acc:HGNC:713]              |
|                 | 190                     | 67          | 93                                 | 53          | 48                                                             |
|                 |                         |             |                                    |             | 14                                                             |
|                 |                         |             |                                    |             | 3.133219722                                                    |
|                 | 0.995793838             | 1.480692984 | 1.00443988                         | 1.006293417 |                                                                |
|                 | 0.222021528             |             |                                    |             |                                                                |
| ENSG00000254858 | 252.0062539             | 244.4939986 |                                    | 186.080733  |                                                                |
| 349.3559223     | 352.7247422             | 306.4936062 |                                    | 227.5269952 |                                                                |
| 336.1914236     | -0.562626192            | 0.038843877 |                                    | 1           | MPV17L2                                                        |
|                 | 18193182                | 18196948    | +                                  | 2135        | protein_coding                                                 |
|                 |                         |             |                                    |             | MPV17 mitochondrial inner membrane protein like 2 [Source:HGNC |
|                 | Symbol;Acc:HGNC:28177]  | -           | 262                                | 281         | 200                                                            |
|                 |                         |             |                                    |             | 317                                                            |
|                 |                         |             |                                    |             | 291                                                            |
|                 | 332                     | 5.933413678 | 5.735443928                        | 4.372986656 |                                                                |
| 8.250370018     | 8.378040778             | 7.230548149 |                                    |             |                                                                |
| ENSG0000042062  | 25.97011014             | 12.18119566 |                                    | 28.84251362 |                                                                |
| 3.306207466     | 2.424225033             | 6.462214589 |                                    | 22.33127314 |                                                                |
| 4.064215696     | 2.441458987             | 0.038950609 |                                    | 1           | RIPOR3                                                         |
|                 | 50586108                | 50691528    | -                                  | 6009        | protein_coding                                                 |
|                 |                         |             |                                    |             | RIPOR family member 3 [Source:HGNC Symbol;Acc:HGNC:16168]      |
|                 | -                       | 27          | 14                                 | 31          | 3                                                              |
|                 |                         |             |                                    |             | 2                                                              |
|                 |                         |             |                                    |             | 7                                                              |
| 0.217251496     | 0.101527672             | 0.240827194 |                                    | 0.027741574 |                                                                |
| 0.020458564     | 0.054166011             |             |                                    |             |                                                                |
| ENSG00000197980 | 39.43609317             | 29.58290374 |                                    | 29.77291729 |                                                                |
| 15.42896818     | 3.636337549             | 5.539041076 |                                    | 32.93063807 |                                                                |

|                                                                 |              |                        |                  |                      |                      |      |
|-----------------------------------------------------------------|--------------|------------------------|------------------|----------------------|----------------------|------|
| 8.201448934                                                     | 2.005164592  | 0.038979921            | 1                | LEKR1                | 3                    |      |
| 156825481                                                       | 157046129    | +                      | 5602             | protein_coding       |                      |      |
| "leucine, glutamate and lysine rich 1 [Source:HGNC              |              |                        |                  |                      |                      |      |
| Symbol;Acc:HGNC:33765]"                                         | -            | 41                     | 34               | 32                   | 14                   | 3    |
| 6                                                               | 0.353868552  | 0.264480959            | 0.266656951      |                      |                      |      |
| 0.138866335                                                     | 0.032917399  | 0.049801126            |                  |                      |                      |      |
| ENSG00000064687                                                 | 50.01650841  | 64.38631991            | 60.47623824      |                      |                      |      |
| 28.65379804                                                     | 15.75746271  | 0                      | 58.29302219      | 14.80375358          |                      |      |
| 1.986353066                                                     | 0.039059452  | 1                      | ABCA7            | 19                   |                      |      |
| 1040101                                                         | 1065572      | +                      | 8367             | protein_coding       | ATP binding cassette |      |
| subfamily A member 7 [Source:HGNC Symbol;Acc:HGNC:37]           |              |                        |                  |                      |                      |      |
| 74                                                              | 65           | 26                     | 13               | 0                    | 0.300493299          |      |
| 0.385407843                                                     | 0.362651621  | 0.172669497            | 0.095503864      | 0                    |                      |      |
| ENSG00000108666                                                 | 586.7321179  | 646.4734554            | 530.3300892      |                      |                      |      |
| 476.0938751                                                     | 435.1483934  | 392.3487429            | 587.8452208      |                      |                      |      |
| 434.5303371                                                     | 0.436733646  | 0.039083454            | 1                | C17orf75             |                      |      |
| 17                                                              | 32324565     | 32350023               | -                | 5740                 |                      |      |
| protein_coding chromosome 17 open reading frame 75 [Source:HGNC |              |                        |                  |                      |                      |      |
| Symbol;Acc:HGNC:30173]                                          | -            | 610                    | 743              | 570                  | 432                  | 359  |
| 425                                                             | 5.138296476  | 5.640732687            | 4.635632501      |                      |                      |      |
| 4.181998744                                                     | 3.844411931  | 3.442770364            |                  |                      |                      |      |
| ENSG00000232059                                                 | 17.31340676  | 10.44102485            | 7.443229322      | 0                    |                      |      |
| 0                                                               | 1.846347025  | 11.73255364            | 0.615449008      |                      |                      |      |
| 4.160459301                                                     | 0.039092761  | 1                      | AL451007.1       | 1                    |                      |      |
| 244694432                                                       | 244694720    | -                      | 289              | processed_pseudogene |                      |      |
| ribosomal protein L37 (RPL37) pseudogene                        |              |                        |                  |                      |                      |      |
| 12                                                              | 8            | 0                      | 0                | 2                    | 3.011451539          |      |
| 1.809430894                                                     | 1.292225123  | 0                      | 0                | 0.321783055          |                      |      |
| ENSG00000134871                                                 | 2496.977997  | 1367.774255            | 2261.81131       |                      |                      |      |
| 1578.163031                                                     | 1612.109647  | 1430.918945            | 2042.187854      |                      |                      |      |
| 1540.397207                                                     | 0.406783683  | 0.039178541            | 1                | COL4A2               | 13                   |      |
| 110305812                                                       | 110513209    | +                      | 19293            | protein_coding       |                      |      |
| collagen type IV alpha 2 chain [Source:HGNC                     |              |                        |                  |                      |                      |      |
| Symbol;Acc:HGNC:2203]                                           | -            | 2596                   | 1572             | 2431                 | 1432                 | 1330 |
| 1550                                                            | 6.505881375  | 3.550678702            | 5.88208411       |                      |                      |      |
| 4.12434795                                                      | 4.237397801  | 3.735622237            |                  |                      |                      |      |
| ENSG00000285781                                                 | 0            | 0                      | 0                | 0                    | 10.90901265          |      |
| 14.7707762                                                      | 0            | 8.559929617            | -5.661805897     | 0.039243802          |                      |      |
| 1                                                               | AL117340.1   | 10                     | 31362799         | 31364049             |                      |      |
| -                                                               | 1251         | unprocessed_pseudogene | putative UPF0607 |                      |                      |      |
| protein FLJ37424 [Source:NCBI gene;Acc:100505502]               |              |                        |                  |                      |                      |      |
| 0                                                               | 0            | 0                      | 9                | 16                   | 0                    | 0    |
| 0                                                               | 0.442214074  | 0.594694184            |                  |                      |                      |      |
| ENSG00000166133                                                 | 398.2083554  | 310.6204893            | 380.5350991      |                      |                      |      |
| 337.2331616                                                     | 633.934846   | 648.0678059            | 363.1213146      |                      |                      |      |
| 539.7452712                                                     | -0.572379789 | 0.039273259            | 1                | RPUSD2               | 15                   |      |
| 40569300                                                        | 40574943     | +                      | 2482             | protein_coding       |                      |      |
| RNA pseudouridylate synthase domain containing 2 [Source:HGNC   |              |                        |                  |                      |                      |      |
| Symbol;Acc:HGNC:24180]                                          | -            | 414                    | 357              | 409                  | 306                  | 523  |
| 702                                                             | 8.064914739  | 6.267942976            | 7.692501094      |                      |                      |      |

|                                           |                                            |                         |              |                        |             |     |
|-------------------------------------------|--------------------------------------------|-------------------------|--------------|------------------------|-------------|-----|
| 6.850648628                               | 12.95231124                                | 13.15122939             |              |                        |             |     |
| ENSG00000242020                           | 5.771135586                                | 11.31111026             | 5.582421991  | 0                      |             |     |
| 0                                         | 0                                          | 7.554889277             | 0            | 5.259894227            |             |     |
| 0.039290984                               | 1                                          | RN7SL68P                | 5            | 141479316              |             |     |
| 141479625                                 | +                                          | 310                     | misc_RNA     | "RNA, 7SL, cytoplasmic |             |     |
| 68, pseudogene                            | [Source:HGNC                               | Symbol;Acc:HGNC:46084]" | -            | 6                      |             |     |
| 13                                        | 6                                          | 0                       | 0            | 0.935816661            |             |     |
| 1.827427921                               | 0.903515469                                | 0                       | 0            | 0                      |             |     |
| ENSG00000084636                           | 442.4537282                                | 218.3914365             | 485.6707132  |                        |             |     |
| 324.0083317                               | 208.4833528                                | 154.1699766             | 382.1719593  |                        |             |     |
| 228.8872204                               | 0.74025701                                 | 0.039313154             | 1            | COL16A1                | 1           |     |
| 31652247                                  | 31704319                                   | -                       | 9269         | protein_coding         |             |     |
| collagen type XVI alpha 1 chain           | [Source:HGNC                               |                         |              |                        |             |     |
| Symbol;Acc:HGNC:2193]                     | -                                          | 460                     | 251          | 522                    | 294         | 172 |
| 167                                       | 2.3995299                                  | 1.180047358             | 2.628958053  |                        |             |     |
| 1.762489311                               | 1.140625102                                | 0.837750329             |              |                        |             |     |
| ENSG00000140265                           | 639.6341941                                | 517.7008155             | 597.3191531  |                        |             |     |
| 355.9683372                               | 512.7235944                                | 398.8109575             | 584.8847209  |                        |             |     |
| 422.500963                                | 0.469978812                                | 0.039405954             | 1            | ZSCAN29                | 15          |     |
| 43358172                                  | 43371025                                   | -                       | 6634         | protein_coding         |             |     |
| zinc finger and SCAN domain containing 29 | [Source:HGNC                               |                         |              |                        |             |     |
| Symbol;Acc:HGNC:26673]                    | zf-C2H2                                    | 665                     | 595          | 642                    | 323         | 423 |
| 432                                       | 4.846714016                                | 3.908409824             | 4.517577344  |                        |             |     |
| 2.705447426                               | 3.919333868                                | 3.027884451             |              |                        |             |     |
| ENSG00000131437                           | 680.9939991                                | 588.1777333             | 543.3557405  |                        |             |     |
| 425.398694                                | 339.3915046                                | 530.8247698             | 604.1758243  |                        |             |     |
| 431.8716561                               | 0.482456784                                | 0.039454818             | 1            | KIF3A                  | 5           |     |
| 132692628                                 | 132737638                                  | -                       | 6860         | protein_coding         |             |     |
| kinesin family member 3A                  | [Source:HGNC                               |                         |              |                        |             |     |
| Symbol;Acc:HGNC:6319]                     |                                            |                         |              |                        |             |     |
| -                                         | 708                                        | 676                     | 584          | 386                    | 280         | 575 |
| 4.99011275                                | 4.294189226                                | 3.97406318              | 3.126620943  |                        |             |     |
| 2.508888009                               | 3.897397903                                |                         |              |                        |             |     |
| ENSG00000115307                           | 2527.757387                                | 2002.066515             | 2526.045951  |                        |             |     |
| 2625.128728                               | 2900.585252                                | 3124.942341             | 2351.956618  |                        |             |     |
| 2883.552107                               | -0.294306047                               | 0.039456747             | 0.243914435  | AUP1                   |             |     |
| 2                                         | 74526645                                   | 74529939                | -            | 2634                   |             |     |
| protein_coding                            | "AUP1, lipid droplet regulating            | VLDL assembly factor    |              |                        |             |     |
| [Source:HGNC                              | Symbol;Acc:HGNC:891]"                      | -                       | 2628         | 2301                   | 2715        |     |
| 2382                                      | 2393                                       | 3385                    | 48.24038962  | 38.06794611            |             |     |
| 48.11717251                               | 50.25022725                                | 55.84371322             | 59.75495457  |                        |             |     |
| ENSG00000270872                           | 100.9948727                                | 98.31965068             | 89.31875186  |                        |             |     |
| 39.6744896                                | 49.69661317                                | 53.54406374             | 96.21109176  |                        |             |     |
| 47.63838883                               | 1.013076037                                | 0.039486132             | 1            | SRGAP2D                | 1           |     |
| 143975087                                 | 144068350                                  | +                       | 1021         |                        |             |     |
| unprocessed_pseudogene                    | SLIT-R0B0 Rho GTPase activating protein 2D | (pseudogene)            | [Source:HGNC | Symbol;Acc:HGNC:43932] | -           | 105 |
| 113                                       | 96                                         | 36                      | 41           | 58                     | 4.972385295 |     |
| 4.822933782                               | 4.389262219                                | 1.959245249             | 2.468342806  |                        |             |     |
| 2.641394502                               |                                            |                         |              |                        |             |     |
| ENSG00000139697                           | 2095.884074                                | 1874.163961             | 1690.54346   |                        |             |     |



|                                                   |                                                                |             |                |                |               |
|---------------------------------------------------|----------------------------------------------------------------|-------------|----------------|----------------|---------------|
| 1810.699622                                       | 1208.476179                                                    | 1395.838351 | 1886.863831    |                |               |
| 1471.671384                                       | 0.358335266                                                    | 0.039528545 | 1              | SBN01          | 12            |
| 123289109                                         | 123364843                                                      | -           | 11124          | protein_coding |               |
|                                                   | strawberry notch homolog 1 [Source:HGNC Symbol;Acc:HGNC:22973] |             |                |                |               |
| -                                                 | 2179                                                           | 2154        | 1817           | 1643           | 997 1512      |
| 9.471035545                                       | 8.438073743                                                    | 7.625002369 | 8.207079246    |                |               |
| 5.509111197                                       | 6.320069136                                                    |             |                |                |               |
| ENSG00000127948                                   | 1506.266388                                                    | 1196.367431 | 1555.634928    |                |               |
| 1497.711982                                       | 2098.166766                                                    | 1846.347025 | 1419.422916    |                |               |
| 1814.075258                                       | -0.353937166                                                   | 0.03955953  | 1              | POR            | 7             |
| 75899200                                          | 75986855                                                       | +           | 6112           | protein_coding |               |
|                                                   | cytochrome p450 oxidoreductase [Source:HGNC                    |             |                |                |               |
| Symbol;Acc:HGNC:9208]                             | -                                                              | 1566        | 1375           | 1672           | 1359 1731     |
| 2000                                              | 12.38824052                                                    | 9.803427701 | 12.77023718    |                |               |
| 12.35515377                                       | 17.4084892                                                     | 15.2152001  |                |                |               |
| ENSG00000257243                                   | 65.4062033                                                     | 26.10256213 | 10.23444032    |                |               |
| 12.12276071                                       | 6.060562582                                                    | 0           | 33.91440192    | 6.061107764    |               |
| 2.496508388                                       | 0.039663543                                                    | 1           | AC020612.1     | 12             |               |
| 49595148                                          | 49595688                                                       | +           | 541            |                |               |
| processed_pseudogene                              | Protein DJ-1 (PARK7)                                           | pseudogene  | -              |                | 68            |
| 30                                                | 11                                                             | 11          | 5              | 0              | 6.077330627   |
| 2.416476563                                       | 0.949164433                                                    | 1.129815331 | 0.568093865    |                | 0             |
| ENSG00000207034                                   | 21.16083048                                                    | 2.610256213 | 0.930403665    |                | 0             |
| 0                                                 | 0                                                              | 8.23383012  | 0              | 5.382082312    |               |
| 0.039704579                                       | 1                                                              | RF00019     | 18             | 2778941        | 2779057 + 117 |
| misc_RNA                                          |                                                                | -           | 22             | 3              | 1 0           |
| 0                                                 | 0                                                              | 9.091552178 | 1.11736224     | 0.398988312    |               |
| 0                                                 | 0                                                              | 0           |                |                |               |
| ENSG00000130224                                   | 8.656703379                                                    | 8.700854042 | 10.23444032    |                | 0             |
| 0                                                 | 0.923173513                                                    | 9.197332579 | 0.307724504    |                |               |
| 4.581253048                                       | 0.039739456                                                    | 1           | LRCH2          | X              | 115110616     |
| 115234072                                         | -                                                              | 4929        | protein_coding | leucine rich   |               |
| repeats and calponin homology domain containing 2 | [Source:HGNC                                                   |             |                |                |               |
| Symbol;Acc:HGNC:29292]                            | -                                                              | 9           | 10             | 11             | 0 0           |
| 1                                                 | 0.088284591                                                    | 0.088409672 | 0.104178932    |                | 0             |
| 0                                                 | 0.009433486                                                    |             |                |                |               |
| ENSG00000184319                                   | 268.3578047                                                    | 380.2273217 | 348.9013744    |                |               |
| 512.4621573                                       | 489.6934566                                                    | 412.6585602 | 332.4955003    |                |               |
| 471.6047247                                       | -0.503117732                                                   | 0.039739606 | 1              | RPL23AP82      |               |
| 22                                                | 50756948                                                       | 50801309    | +              | 4250           |               |
| transcribed_unprocessed_pseudogene                | ribosomal protein L23a                                         |             |                |                |               |
| pseudogene 82                                     | [Source:HGNC Symbol;Acc:HGNC:33730]                            |             |                |                |               |
| 437                                               | 375                                                            | 465         | 404            | 447            | 3.174069922   |
| 4.480754036                                       | 4.118967578                                                    | 6.079614841 | 5.843052591    |                |               |
| 4.890458875                                       |                                                                |             |                |                |               |
| ENSG00000131143                                   | 7469.77316                                                     | 7328.72936  | 8336.41684     |                |               |
| 8089.187601                                       | 9793.869132                                                    | 9439.449168 | 7711.639787    |                |               |
| 9107.501967                                       | -0.240021186                                                   | 0.039805537 | 0.245244849    |                | COX4I1        |
| 16                                                | 85798633                                                       | 85807044    | +              | 4792           |               |
| protein_coding                                    | cytochrome c oxidase subunit 4I1 [Source:HGNC                  |             |                |                |               |

|                                                            |                                   |                            |                              |                |             |      |
|------------------------------------------------------------|-----------------------------------|----------------------------|------------------------------|----------------|-------------|------|
| Symbol;Acc:HGNC:2265]                                      | -                                 | 7766                       | 8423                         | 8960           | 7340        | 8080 |
| 10225                                                      | 78.35772047                       | 76.59644067                |                              | 87.28452164    |             |      |
| 85.11209766                                                | 103.6434621                       | 99.21504311                |                              |                |             |      |
| ENSG00000256188                                            | 17.31340676                       | 0                          | 10.23444032                  | 0              | 0           |      |
| 0                                                          | 9.182615691                       | 0                          | 5.539667227                  | 0.03982798     |             |      |
| 1                                                          | TAS2R30                           | 12                         | 11132958                     | 11134644       |             | -    |
| 1687                                                       | protein_coding                    | taste 2 receptor member 30 |                              |                |             |      |
| [Source:HGNC Symbol;Acc:HGNC:19112]                        |                                   | -                          | 18                           | 0              | 11          |      |
| 0                                                          | 0                                 | 0                          | 0.515891817                  | 0              | 0.304385275 |      |
| 0                                                          | 0                                 | 0                          |                              |                |             |      |
| ENSG00000158636                                            | 824.3105328                       | 634.2922597                | 565.6854284                  |                |             |      |
| 547.7283702                                                | 471.5117688                       | 463.4331034                | 674.7627403                  |                |             |      |
| 494.2244142                                                | 0.449165878                       | 0.03985233                 | 1                            | EMSY           | 11          |      |
| 76444923                                                   | 76553025                          | +                          | 11783                        | protein_coding |             |      |
| "EMSY, BRCA2 interacting transcriptional repressor         |                                   |                            |                              |                |             |      |
| [Source:HGNC Symbol;Acc:HGNC:18071]"                       |                                   | -                          | 857                          | 729            | 608         |      |
| 497                                                        | 389                               | 502                        | 3.516625822                  | 2.696064316    |             |      |
| 2.408761147                                                | 2.343756852                       | 2.029275835                | 1.980974374                  |                |             |      |
| ENSG00000114841                                            | 595.3888213                       | 381.9674925                | 544.2861441                  |                |             |      |
| 185.1476181                                                | 220.604478                        | 516.9771671                | 507.2141526                  |                |             |      |
| 307.5764211                                                | 0.718741829                       | 0.039863008                | 1                            | DNAH1          | 3           |      |
| 52316319                                                   | 52400491                          | +                          | 13872                        | protein_coding |             |      |
| dynein axonemal heavy chain 1 [Source:HGNC                 |                                   |                            |                              |                |             |      |
| Symbol;Acc:HGNC:2940]                                      | -                                 | 619                        | 439                          | 585            | 168         | 182  |
| 560                                                        | 2.157509841                       | 1.379062782                | 1.96862421                   |                |             |      |
| 0.672949144                                                | 0.806454126                       | 1.877067823                |                              |                |             |      |
| ENSG00000261616                                            | 15.3896949                        | 0                          | 12.09524765                  | 0              | 0           |      |
| 0                                                          | 9.161647514                       | 0                          | 5.536445078                  | 0.039865047    |             |      |
| 1                                                          | AC036108.3                        | 15                         | 99139317                     | 99145370       |             |      |
| +                                                          | 2677                              | antisense                  | "novel transcript, antisense |                |             |      |
| to TTC23"                                                  | -                                 | 16                         | 0                            | 13             | 0           | 0    |
| 0.288983354                                                | 0                                 | 0.226694517                | 0                            | 0              | 0           |      |
| ENSG00000144034                                            | 491.5083807                       | 494.2085096                | 408.447209                   |                |             |      |
| 582.9945832                                                | 569.6928827                       | 739.4619837                | 464.7213664                  |                |             |      |
| 630.7164832                                                | -0.441519358                      | 0.039894979                | 1                            | TPRKB          | 2           |      |
| 73729104                                                   | 73737400                          | -                          | 2047                         | protein_coding |             |      |
| TP53RK binding protein [Source:HGNC Symbol;Acc:HGNC:24259] |                                   |                            |                              |                |             |      |
| -                                                          | 511                               | 568                        | 439                          | 529            | 470         | 801  |
| 12.06991673                                                | 12.09174809                       | 10.01135158                | 14.359849                    |                |             |      |
| 14.11326108                                                | 18.1947332                        |                            |                              |                |             |      |
| ENSG00000227372                                            | 629.0537788                       | 555.1144879                | 659.6561986                  |                |             |      |
| 393.4386885                                                | 471.5117688                       | 500.3600439                | 614.6081551                  |                |             |      |
| 455.1035004                                                | 0.432851731                       | 0.039915775                | 1                            | TP73-AS1       |             |      |
| 1                                                          | 3735511                           | 3747373                    | -                            | 9701           |             |      |
| transcribed_unitary_pseudogene                             | TP73 antisense RNA 1 [Source:HGNC |                            |                              |                |             |      |
| Symbol;Acc:HGNC:29052]                                     | -                                 | 654                        | 638                          | 709            | 357         | 389  |
| 542                                                        | 3.259586123                       | 2.865911478                | 3.411738736                  |                |             |      |
| 2.044860826                                                | 2.464793029                       | 2.597848378                |                              |                |             |      |
| ENSG00000142208                                            | 1765.005633                       | 2021.208394                | 1929.657202                  |                |             |      |
| 2522.636297                                                | 2260.589843                       | 2154.686979                | 1905.29041                   |                |             |      |

|                                                              |                |             |       |                |                |             |
|--------------------------------------------------------------|----------------|-------------|-------|----------------|----------------|-------------|
| 2312.637706                                                  | -0.279261781   | 0.039928007 | 1     | AKT1           | 14             |             |
| 104769349                                                    | 104795751      | -           | 11162 | protein_coding |                |             |
| AKT serine/threonine kinase 1 [Source:HGNC                   |                |             |       |                |                |             |
| Symbol;Acc:HGNC:391]                                         | -              | 1835        | 2323  | 2074           | 2289           | 1865        |
| 2334                                                         | 7.94868464     | 9.069133385 |       | 8.673867221    |                |             |
| 11.39503906                                                  | 10.27032479    | 9.722766404 |       |                |                |             |
| ENSG00000176014                                              | 3677.175224    | 5009.951758 |       | 5147.923479    |                |             |
| 5823.333417                                                  | 5382.991685    | 5668.285368 |       | 4611.683487    |                |             |
| 5624.870157                                                  | -0.286477529   | 0.039944805 |       | 0.245279808    |                | TUBB6       |
| 18                                                           | 12307669       | 12344320    |       | +              | 4117           |             |
| protein_coding tubulin beta 6 class V [Source:HGNC           |                |             |       |                |                |             |
| Symbol;Acc:HGNC:20776]                                       | -              | 3823        | 5758  | 5533           | 5284           | 4441        |
| 6140                                                         | 44.89775725    | 60.94658715 |       | 62.73730214    |                |             |
| 71.31715101                                                  | 66.30515069    | 69.34553806 |       |                |                |             |
| ENSG00000153904                                              | 451.1104316    | 416.7709086 |       | 481.9490986    |                |             |
| 862.9201487                                                  | 539.3900698    | 511.4381261 |       | 449.9434796    |                |             |
| 637.9161148                                                  | -0.50340696    | 0.039981513 |       | 1              | DDAH1          | 1           |
| 85318481                                                     | 85578363       | -           |       | 4568           | protein_coding |             |
| dimethylarginine dimethylaminohydrolase 1 [Source:HGNC       |                |             |       |                |                |             |
| Symbol;Acc:HGNC:2715]                                        | -              | 469         | 479   | 518            | 783            | 445         |
| 554                                                          | 4.964185069    | 4.569492995 |       | 5.293582676    |                |             |
| 9.524621155                                                  | 5.987992889    | 5.639163514 |       |                |                |             |
| ENSG00000100605                                              | 827.1961006    | 838.7623297 |       | 777.8174641    |                |             |
| 958.8001652                                                  | 1043.628877    | 1081.959357 |       | 814.5919648    |                |             |
| 1028.129466                                                  | -0.336021592   | 0.040050373 |       | 1              | ITPK1          | 14          |
| 92936914                                                     | 93116320       | -           |       | 6783           | protein_coding |             |
| inositol-tetrakisphosphate 1-kinase [Source:HGNC             |                |             |       |                |                |             |
| Symbol;Acc:HGNC:6177]                                        | -              | 860         | 964   | 836            | 870            | 861         |
| 1172                                                         | 6.130245267    | 6.193181596 |       | 5.753478522    |                |             |
| 7.127044643                                                  | 7.802408684    | 8.034092224 |       |                |                |             |
| ENSG00000280062                                              | 0              | 0           |       | 0              | 0              |             |
| 38.77328753                                                  | 0.310134555    | 12.92442918 |       | -5.297719116   |                |             |
| 0.04007149                                                   | 1              | AL031719.1  |       | 16             | 1530715        | 1533301 +   |
| 2587                                                         | TEC            | TEC         |       | -              | 0              | 0           |
| 0                                                            | 42             | 0           |       | 0              | 0.018044698    | 0           |
| 0.754890361                                                  |                |             |       |                |                |             |
| ENSG00000073067                                              | 20.19897455    | 0           |       | 7.443229322    | 0              | 0           |
| 0                                                            | 9.214067957    | 0           |       | 5.54449341     | 0.040156516    |             |
| 1                                                            | CYP2W1         | 7           |       | 983199         | 989640         | +           |
| 2773                                                         |                |             |       |                |                |             |
| protein_coding cytochrome P450 family 2 subfamily W member 1 |                |             |       |                |                |             |
| [Source:HGNC Symbol;Acc:HGNC:20243]                          | -              |             |       | 21             | 0              | 8           |
| 0                                                            | 0              | 0           |       | 0.366159783    | 0              | 0.134674742 |
| 0                                                            | 0              | 0           |       |                |                |             |
| ENSG00000175793                                              | 12.5041271     | 0           |       | 14.88645864    | 0              | 0           |
| 0                                                            | 9.130195248    | 0           |       | 5.531602567    | 0.040237877    |             |
| 1                                                            | SFN            | 1           |       | 26863138       | 26864457       | +           |
| 1320                                                         | protein_coding | stratifin   |       |                |                |             |
| [Source:HGNC                                                 |                |             |       |                |                |             |
| Symbol;Acc:HGNC:10773]                                       | -              | 13          |       | 0              | 16             | 0           |
| 0                                                            | 0.476179437    | 0           |       | 0.56583797     | 0              | 0           |
| 0                                                            |                |             |       |                |                |             |

|                                                         |                                           |                      |                |                        |                        |      |
|---------------------------------------------------------|-------------------------------------------|----------------------|----------------|------------------------|------------------------|------|
| ENSG00000220091                                         | 2.885567793                               | 8.700854042          | 11.16484398    | 0                      |                        |      |
| 0                                                       | 0                                         | 7.583755273          | 0              | 5.26523267             |                        |      |
| 0.040244395                                             | 1                                         | LAP3P1               | 6              | 82924829               | 82925122               |      |
| -                                                       | 294                                       | processed_pseudogene |                |                        | leucine aminopeptidase |      |
| 3 pseudogene 1                                          | [Source:HGNC Symbol;Acc:HGNC:42364]       |                      |                | -                      | 3                      |      |
| 10                                                      | 12                                        | 0                    | 0              | 0                      | 0.49337273             |      |
| 1.482215216                                             | 1.905372757                               | 0                    | 0              | 0                      |                        |      |
| ENSG00000092758                                         | 12.5041271                                | 0                    | 21.3992843     | 1.102069155            |                        |      |
| 0                                                       | 0                                         | 11.30113713          | 0.367356385    | 4.877584128            |                        |      |
| 0.040245071                                             | 1                                         | COL9A3               | 20             | 62816244               |                        |      |
| 62841159                                                | +                                         | 4841                 | protein_coding | collagen type IX alpha |                        |      |
| 3 chain                                                 | [Source:HGNC Symbol;Acc:HGNC:2219]        |                      |                | -                      | 13                     | 0    |
| 23                                                      | 1                                         | 0                    | 0              | 0.129840293            | 0                      |      |
| 0.22178838                                              | 0.011478284                               | 0                    | 0              |                        |                        |      |
| ENSG00000135446                                         | 2668.188352                               | 2517.157074          | 2824.705528    |                        |                        |      |
| 3124.366056                                             | 3139.371417                               | 3223.721906          | 2670.016985    |                        |                        |      |
| 3162.48646                                              | -0.244334603                              | 0.040263797          | 0.246414441    | CDK4                   |                        |      |
| 12                                                      | 57747727                                  | 57756013             | -              | 3168                   |                        |      |
| protein_coding                                          | cyclin dependent kinase 4                 | [Source:HGNC         |                |                        |                        |      |
| Symbol;Acc:HGNC:1773]                                   | -                                         | 2774                 | 2893           | 3036                   | 2835                   | 2590 |
| 3492                                                    | 42.33723588                               | 39.7943906           | 44.73656453    |                        |                        |      |
| 49.72558876                                             | 50.25299514                               | 51.25309313          |                |                        |                        |      |
| ENSG00000277957                                         | 0                                         | 0                    | 19.8372448     | 6.060562582            |                        |      |
| 0                                                       | 0                                         | 8.63260246           | -5.67096173    | 0.040342059            |                        |      |
| 1                                                       | SEN3-EIF4A1                               | 17                   | 7563287        | 7578715                | +                      | 3519 |
| protein_coding                                          | SEN3-EIF4A1 readthrough (NMD candidate)   |                      |                |                        |                        |      |
| [Source:HGNC Symbol;Acc:HGNC:49182]                     |                                           |                      | -              | 0                      | 0                      | 0    |
| 18                                                      | 5                                         | 0                    | 0              | 0                      | 0.284226968            |      |
| 0.087336965                                             | 0                                         |                      |                |                        |                        |      |
| ENSG00000138698                                         | 671.3754398                               | 754.3640455          | 656.8649876    |                        |                        |      |
| 980.8415483                                             | 972.1142381                               | 763.464495           | 694.201491     |                        |                        |      |
| 905.4734271                                             | -0.382374446                              | 0.040368357          | 1              | RAP1GDS1               |                        |      |
| 4                                                       | 98261384                                  | 98443861             | +              | 5424                   |                        |      |
| protein_coding                                          | Rap1 GTPase-GDP dissociation stimulator 1 | [Source:HGNC         |                |                        |                        |      |
| Symbol;Acc:HGNC:9859]                                   | -                                         | 698                  | 867            | 706                    | 890                    | 802  |
| 827                                                     | 6.222099592                               | 6.965591706          | 6.076185948    |                        |                        |      |
| 9.117638507                                             | 9.088705842                               | 7.089520242          |                |                        |                        |      |
| ENSG00000252906                                         | 26.93196607                               | 0                    | 1.86080733     | 0                      | 0                      |      |
| 0                                                       | 9.597591132                               | 0                    | 5.603186554    | 0.040425793            |                        |      |
| 1                                                       | SCARNA3                                   | 1                    | 175968398      | 175968540              |                        | -    |
| 143                                                     | scaRNA small Cajal body-specific RNA 3    | [Source:HGNC         |                |                        |                        |      |
| Symbol;Acc:HGNC:32577]                                  | -                                         | 28                   | 0              | 2                      | 0                      | 0    |
| 0                                                       | 9.467236152                               | 0                    | 0.652889966    | 0                      | 0                      |      |
| 0                                                       |                                           |                      |                |                        |                        |      |
| ENSG00000119227                                         | 225.0742878                               | 308.0102331          | 348.9013744    |                        |                        |      |
| 405.5614492                                             | 466.6633188                               | 403.4268251          | 293.9952985    |                        |                        |      |
| 425.2171977                                             | -0.53159826                               | 0.040495872          | 1              | PIGZ                   | 3                      |      |
| 196946343                                               | 196969060                                 | -                    | 3211           | protein_coding         |                        |      |
| phosphatidylinositol glycan anchor biosynthesis class Z |                                           |                      |                |                        |                        |      |
| [Source:HGNC Symbol;Acc:HGNC:30596]                     |                                           |                      | -              | 234                    | 354                    | 375  |

|                        |                                                                 |                |                                   |                                |                |     |
|------------------------|-----------------------------------------------------------------|----------------|-----------------------------------|--------------------------------|----------------|-----|
| 368                    | 385                                                             | 437            | 3.523520222                       | 4.804205258                    |                |     |
| 5.451763378            | 6.368241971                                                     |                | 7.370005028                       | 6.328082748                    |                |     |
| ENSG00000164045        | 695.4218381                                                     |                | 636.9025159                       | 756.4181798                    |                |     |
| 1040.353283            | 790.2973606                                                     |                | 892.7087868                       | 696.2475113                    |                |     |
| 907.7864767            | -0.383127696                                                    |                | 0.040513952                       | 1                              | CDC25A         | 3   |
| 48157146               |                                                                 | 48188402       | -                                 | 4117                           | protein_coding |     |
|                        | cell division cycle 25A [Source:HGNC Symbol;Acc:HGNC:1725]      |                |                                   |                                |                |     |
| -                      | 723                                                             | 732            | 813                               | 944                            | 652            | 967 |
| 8.490996205            | 7.747985723                                                     |                | 9.218403514                       | 12.74098989                    |                |     |
| 9.734509851            | 10.92135754                                                     |                |                                   |                                |                |     |
| ENSG00000146411        | 3.847423724                                                     |                | 2.610256213                       | 16.74726597                    |                | 0   |
| 0                      | 0                                                               | 7.73498197     | 0                                 | 5.292856694                    |                |     |
| 0.040620266            | 1                                                               | SLC2A12        | 6                                 | 133988697                      | 134052636      |     |
| -                      | 4468                                                            | protein_coding |                                   | solute carrier family 2 member |                |     |
| 12 [Source:HGNC        | Symbol;Acc:HGNC:18067]                                          | -              | 4                                 | 3                              | 18             |     |
| 0                      | 0                                                               | 0              | 0.043286059                       | 0.029259486                    |                |     |
| 0.188063873            | 0                                                               | 0              | 0                                 |                                |                |     |
| ENSG00000130045        | 0                                                               | 8.700854042    | 18.6080733                        | 0                              | 0              |     |
| 0                      | 9.102975782                                                     | 0              | 5.52853156                        | 0.040705298                    |                |     |
| 1                      | NXNL2                                                           | 9              | 88534033                          | 88584274                       |                | +   |
| 2498                   | protein_coding                                                  |                | nucleoredoxin like 2 [Source:HGNC |                                |                |     |
| Symbol;Acc:HGNC:30482] | -                                                               | 0              | 10                                | 20                             | 0              | 0   |
| 0                      | 0                                                               | 0.174448068    | 0.373752062                       | 0                              | 0              |     |
| 0                      |                                                                 |                |                                   |                                |                |     |
| ENSG00000187676        | 457.8434231                                                     |                | 437.6529583                       | 411.23842                      |                |     |
| 865.124287             | 509.0872568                                                     |                | 496.6673498                       | 435.5782672                    |                |     |
| 623.6262979            | -0.517504309                                                    |                | 0.040709335                       | 1                              | B3GLCT         | 13  |
| 31199936               |                                                                 | 31332276       | +                                 | 4566                           | protein_coding |     |
|                        | beta 3-galucosyltransferase [Source:HGNC Symbol;Acc:HGNC:20207] |                |                                   |                                |                |     |
| -                      | 476                                                             | 503            | 442                               | 785                            | 420            | 538 |
| 5.04048425             | 4.800546443                                                     |                | 4.518896537                       | 9.553132321                    |                |     |
| 5.654064304            | 5.478698315                                                     |                |                                   |                                |                |     |
| ENSG00000182359        | 143.3165337                                                     |                | 133.9931523                       | 126.5348985                    |                |     |
| 89.26760159            | 41.21182555                                                     |                | 81.23926912                       | 134.6148615                    |                |     |
| 70.57289875            | 0.928366838                                                     |                | 0.040753182                       | 1                              | KBTBD3         | 11  |
| 106051098              |                                                                 | 106077765      | -                                 | 5516                           | protein_coding |     |
|                        | kelch repeat and BTB domain containing 3 [Source:HGNC           |                |                                   |                                |                |     |
| Symbol;Acc:HGNC:22934] | -                                                               | 149            | 154                               | 136                            | 81             | 34  |
| 88                     | 1.306060297                                                     |                | 1.216620307                       | 1.150961209                    |                |     |
| 0.815967395            | 0.378880296                                                     |                | 0.741804447                       |                                |                |     |
| ENSG00000079616        | 689.6507025                                                     |                | 633.4221743                       | 808.5207851                    |                |     |
| 965.4125801            | 1138.173653                                                     |                | 748.6937188                       | 710.5312206                    |                |     |
| 950.7599839            | -0.419306667                                                    |                | 0.040760918                       | 1                              | KIF22          | 16  |
| 29790719               |                                                                 | 29805385       | +                                 | 4312                           | protein_coding |     |
|                        | kinesin family member 22 [Source:HGNC Symbol;Acc:HGNC:6391]     |                |                                   |                                |                |     |
| -                      | 717                                                             | 728            | 869                               | 876                            | 939            | 811 |
| 8.039732888            | 7.357177345                                                     |                | 9.407777989                       | 11.28853016                    |                |     |
| 13.38548773            | 8.745267942                                                     |                |                                   |                                |                |     |
| ENSG00000126500        | 58.67321179                                                     |                | 24.36239132                       | 25.12089896                    |                |     |
| 5.510345777            | 10.90901265                                                     |                | 12.92442918                       | 36.05216736                    |                |     |

|                                                                       |              |                                           |             |                |                 |
|-----------------------------------------------------------------------|--------------|-------------------------------------------|-------------|----------------|-----------------|
| 9.781262534                                                           | 1.877566771  | 0.040766478                               | 1           | FLRT1          | 11              |
| 64103188                                                              | 64119173     | +                                         | 3949        | protein_coding |                 |
| fibronectin leucine rich transmembrane protein 1 [Source:HGNC         |              |                                           |             |                |                 |
| Symbol;Acc:HGNC:3760]                                                 | -            | 61                                        | 28          | 27             | 5 9             |
| 14                                                                    | 0.746868113  | 0.308979379                               | 0.319170443 |                |                 |
| 0.070354991                                                           | 0.140088581  | 0.164843535                               |             |                |                 |
| ENSG00000261485                                                       | 75.02476261  | 22.62222051                               | 26.98170629 |                |                 |
| 1.102069155                                                           | 16.96957523  | 12.00125567                               | 41.54289647 |                |                 |
| 10.02430002                                                           | 2.052628149  | 0.04079639                                | 1           | PAN3-AS1       |                 |
| 13                                                                    | 28136843     | 28138193                                  | -           | 1351           |                 |
| antisense PAN3 antisense RNA 1 [Source:HGNC                           |              |                                           |             |                |                 |
| Symbol;Acc:HGNC:39932]                                                | -            | 78                                        | 26          | 29             | 1 14            |
| 13                                                                    | 2.791518242  | 0.838641977                               | 1.002048367 |                |                 |
| 0.041129809                                                           | 0.636971567  | 0.447423738                               |             |                |                 |
| ENSG00000071127                                                       | 8093.055803  | 7652.40113                                | 8255.471721 |                |                 |
| 9646.411317                                                           | 8974.481071  | 9098.798141                               | 8000.309552 |                |                 |
| 9239.896843                                                           | -0.207848017 | 0.040935726                               | 0.249326009 | WDR1           |                 |
| 4                                                                     | 10074339     | 10116949                                  | -           | 7827           |                 |
| protein_coding WD repeat domain 1 [Source:HGNC Symbol;Acc:HGNC:12754] |              |                                           |             |                |                 |
| -                                                                     | 8414         | 8795                                      | 8873        | 8753           | 7404 9856       |
| 51.97666262                                                           | 48.96650506  | 52.92016426                               | 62.14034188 |                |                 |
| 58.14581156                                                           | 58.55127804  |                                           |             |                |                 |
| ENSG00000226752                                                       | 509.7836434  | 507.2597907                               | 430.776897  |                |                 |
| 423.1945557                                                           | 298.179679   | 301.8777387                               | 482.606777  |                |                 |
| 341.0839911                                                           | 0.500977895  | 0.040974938                               | 1           | CUTALP         | 9               |
| 120824828                                                             | 120854385    | +                                         | 7224        |                |                 |
| transcribed_unitary_pseudogene "cutA divalent cation tolerance        |              |                                           |             |                |                 |
| homolog-like, pseudogene [Source:HGNC Symbol;Acc:HGNC:27367]" -       |              |                                           |             |                |                 |
| 530                                                                   | 583          | 463                                       | 384         | 246            | 327 3.547311679 |
| 3.516814126                                                           | 2.991915265  | 2.953694203                               | 2.093171101 |                |                 |
| 2.104752497                                                           |              |                                           |             |                |                 |
| ENSG00000119878                                                       | 438.6063045  | 527.271755                                | 424.2640713 |                |                 |
| 342.7435073                                                           | 329.6946044  | 332.3424646                               | 463.3807103 |                |                 |
| 334.9268588                                                           | 0.468618874  | 0.04104048                                | 1           | CRIPT          | 2               |
| 46616416                                                              | 46625742     | +                                         | 2561        | protein_coding |                 |
| CXXC repeat containing interactor of PDZ3 domain [Source:HGNC         |              |                                           |             |                |                 |
| Symbol;Acc:HGNC:14312]                                                | -            | 456                                       | 606         | 456            | 311 272         |
| 360                                                                   | 8.60907479   | 10.31149519                               | 8.311918956 |                |                 |
| 6.747810135                                                           | 6.528398943  | 6.536179047                               |             |                |                 |
| ENSG00000279110                                                       | 41.35980503  | 17.40170808                               | 22.32968796 |                | 0               |
| 10.90901265                                                           | 0            | 27.03040036                               | 3.636337549 |                |                 |
| 2.927197549                                                           | 0.041049485  | 1                                         | AL022323.4  | 22             |                 |
| 25052122                                                              | 25065241     | -                                         | 13120       | antisense      | novel           |
| transcript                                                            | -            | 43                                        | 20          | 24             | 0 9 0           |
| 0.158465906                                                           | 0.066428548  | 0.08539323                                | 0           |                |                 |
| 0.042165382                                                           | 0            |                                           |             |                |                 |
| ENSG00000232871                                                       | 2.885567793  | 3.480341617                               | 16.74726597 |                | 0               |
| 0                                                                     | 0            | 7.704391794                               | 0           | 5.287312255    |                 |
| 0.041059575                                                           | 1            | SEC1P                                     | 19          | 48638071       | 48682245        |
| +                                                                     | 2634         | transcribed_unitary_pseudogene "secretory |             |                |                 |

blood group 1, pseudogene [Source:HGNC Symbol;Acc:HGNC:44149]" -

|                                               |                                |             |                              |      |                        |                |
|-----------------------------------------------|--------------------------------|-------------|------------------------------|------|------------------------|----------------|
| 3                                             | 4                              | 18          | 0                            | 0    | 0                      | 0.055068938    |
| 0.066176351                                   |                                | 0.319008879 | 0                            | 0    | 0                      | 0              |
| ENSG00000167986                               | 7525.560804                    |             | 6661.373855                  |      | 7488.819101            |                |
| 8274.335219                                   | 8576.908165                    |             | 8318.716523                  |      | 7225.251253            |                |
| 8389.986636                                   | -0.215642368                   |             | 0.04109758                   |      | 0.249326009            | DDB1           |
| 11                                            | 61299451                       |             | 61342596                     |      | -                      | 13950          |
| protein_coding                                | damage specific                |             | DNA binding                  |      | protein 1 [Source:HGNC |                |
| Symbol;Acc:HGNC:2717]                         | -                              |             | 7824                         | 7656 | 8049                   | 7508 7076      |
| 9011                                          | 27.11788725                    |             | 23.91587721                  |      | 26.93480003            |                |
| 29.90625968                                   | 31.17891348                    |             | 30.03514965                  |      |                        |                |
| ENSG00000176454                               | 508.8217875                    |             | 488.1179118                  |      | 532.1908965            |                |
| 246.8634908                                   | 378.1791051                    |             | 436.6610715                  |      | 509.7101986            |                |
| 353.9012225                                   | 0.525305084                    |             | 0.041107024                  |      | 1                      | LPCAT4 15      |
| 34358618                                      | 34367278                       |             | -                            |      | 4799                   | protein_coding |
| lysophosphatidylcholine                       | acyltransferase 4 [Source:HGNC |             |                              |      |                        |                |
| Symbol;Acc:HGNC:30059]                        | -                              |             | 529                          | 561  | 572                    | 224 312        |
| 473                                           | 5.329741414                    |             | 5.094138038                  |      | 5.564053724            |                |
| 2.593637711                                   | 3.996236704                    |             | 4.582910848                  |      |                        |                |
| ENSG00000114200                               | 13.46598303                    |             | 3.480341617                  |      | 14.88645864            |                |
| 65.02208017                                   | 23.03013781                    |             | 29.54155241                  |      | 10.61092776            |                |
| 39.19792346                                   | -1.888702748                   |             | 0.041155142                  |      | 1                      | BCHE 3         |
| 165772904                                     | 165837472                      |             | -                            |      | 3082                   | protein_coding |
| butyrylcholinesterase [Source:HGNC            |                                |             |                              |      |                        |                |
| Symbol;Acc:HGNC:983]                          | -                              |             |                              |      |                        |                |
| 14                                            | 4                              | 16          | 59                           | 19   | 32                     | 0.219632506    |
| 0.056556947                                   | 0.242344621                    |             | 1.063730032                  |      | 0.378938147            |                |
| 0.48277899                                    |                                |             |                              |      |                        |                |
| ENSG00000230836                               | 0                              | 25.23247672 | 19.53847697                  |      | 2.204138311            |                |
| 0                                             | 0                              | 14.92365123 | 0.73471277                   |      | 4.358945827            |                |
| 0.041162221                                   | 1                              | LINC01293   | 2                            |      | 74940258               |                |
| 74942670                                      | +                              | 1266        | lincRNA long intergenic non- |      |                        |                |
| protein coding                                | RNA 1293 [Source:HGNC          |             |                              |      |                        |                |
| Symbol;Acc:HGNC:50362]                        | -                              |             |                              |      |                        |                |
| 0                                             | 29                             | 21          | 2                            | 0    | 0                      | 0              |
| 0.998212238                                   | 0.774339877                    |             | 0.087782579                  |      | 0                      | 0              |
| ENSG00000143158                               | 623.2826433                    |             | 1159.823844                  |      | 854.1105646            |                |
| 1044.761559                                   | 1213.324629                    |             | 1338.601593                  |      | 879.0723506            |                |
| 1198.895927                                   | -0.447432231                   |             | 0.041196236                  |      | 1                      | MPC2 1         |
| 167916729                                     | 167937040                      |             | -                            |      | 2552                   | protein_coding |
| mitochondrial pyruvate carrier 2 [Source:HGNC |                                |             |                              |      |                        |                |
| Symbol;Acc:HGNC:24515]                        | -                              |             | 648                          | 1333 | 918                    | 948 1001       |
| 1450                                          | 12.27709319                    |             | 22.76187726                  |      | 16.79221735            |                |
| 20.64142666                                   | 24.11019748                    |             | 26.41912017                  |      |                        |                |
| ENSG00000120802                               | 2066.06654                     |             | 2274.403247                  |      | 2285.071402            |                |
| 3090.201912                                   | 2574.526985                    |             | 2413.175562                  |      | 2208.513729            |                |
| 2692.63482                                    | -0.285708988                   |             | 0.041269505                  |      | 0.249326009            | TMPO           |
| 12                                            | 98515512                       |             | 98550379                     |      | +                      | 8593           |
| protein_coding                                | thymopoietin [Source:HGNC      |             |                              |      |                        |                |
| Symbol;Acc:HGNC:11875]                        | -                              |             |                              |      |                        |                |
| -                                             | 2148                           | 2614        | 2456                         | 2804 | 2124                   | 2614           |
| 12.08622519                                   | 13.25620981                    |             | 13.34226575                  |      | 18.13198041            |                |
| 15.19347308                                   | 14.14463645                    |             |                              |      |                        |                |

|                                    |                                           |              |             |                 |             |             |
|------------------------------------|-------------------------------------------|--------------|-------------|-----------------|-------------|-------------|
| ENSG0000035687                     | 2549.880073                               | 3079.232246  | 2619.086318 |                 |             |             |
| 2460.920424                        | 2310.286456                               | 1973.74497   | 2749.399545 |                 |             |             |
| 2248.317283                        | 0.2907484                                 | 0.041282738  | 0.249326009 | ADSS            |             |             |
| 1                                  | 244408494                                 | 244452134    | -           | 3666            |             |             |
| protein_coding                     | adenylosuccinate synthase [Source:HGNC    |              |             |                 |             |             |
| Symbol;Acc:HGNC:292]               | -                                         | 2651         | 3539        | 2815            | 2233        | 1906        |
| 2138                               | 34.96378843                               | 42.06749965  | 35.84527977 |                 |             |             |
| 33.8460745                         | 31.9578678                                | 27.1172883   |             |                 |             |             |
| ENSG00000177030                    | 1712.103557                               | 1636.630645  | 1462.594562 |                 |             |             |
| 1782.045824                        | 1941.804251                               | 2194.38344   | 1603.776255 |                 |             |             |
| 1972.744505                        | -0.299093479                              | 0.041288364  | 1           | DEAF1           | 11          |             |
| 644233                             | 706715                                    | -            | 4452        | protein_coding  | "DEAF1,     |             |
| transcription factor               | [Source:HGNC Symbol;Acc:HGNC:14677]" SAND |              |             |                 |             |             |
| 1780                               | 1881                                      | 1572         | 1617        | 1602            | 2377        | 19.33152267 |
| 18.41162995                        | 16.48327187                               | 20.18212575  | 22.11845136 |                 |             |             |
| 24.82590243                        |                                           |              |             |                 |             |             |
| ENSG00000151320                    | 126.9649829                               | 162.7059706  | 88.38834819 |                 |             |             |
| 71.6344951                         | 79.99942608                               | 38.77328753  | 126.0197672 |                 |             |             |
| 63.46906957                        | 0.994189125                               | 0.041335709  | 1           | AKAP6           | 14          |             |
| 32329273                           | 32837681                                  | +            | 19748       | protein_coding  |             |             |
| A-kinase anchoring protein 6       | [Source:HGNC Symbol;Acc:HGNC:376]         |              |             |                 |             |             |
| -                                  | 132                                       | 187          | 95          | 65              | 66          | 42          |
| 0.32318562                         | 0.412645474                               | 0.224567303  | 0.182895189 |                 |             |             |
| 0.205432039                        | 0.098891096                               |              |             |                 |             |             |
| ENSG00000143248                    | 50.97836434                               | 70.47691774  | 64.1978529  |                 |             |             |
| 28.65379804                        | 31.51492542                               | 11.07808215  | 61.88437833 |                 |             |             |
| 23.74893521                        | 1.389764475                               | 0.041383773  | 1           | RGS5            | 1           |             |
| 163111121                          | 163321791                                 | -            | 6821        | protein_coding  |             |             |
| regulator of G protein signaling 5 | [Source:HGNC                              |              |             |                 |             |             |
| Symbol;Acc:HGNC:10001]             | -                                         | 53           | 81          | 69              | 26          | 26          |
| 12                                 | 0.375689482                               | 0.51748238   | 0.472222936 |                 |             |             |
| 0.211805553                        | 0.2343002                                 | 0.081802055  |             |                 |             |             |
| ENSG00000111275                    | 0                                         | 0            | 0           | 31.51492542     | 0           |             |
| 0                                  | 10.50497514                               | -5.952418974 | 0.041389803 | 1               |             |             |
| ALDH2                              | 12                                        | 111766887    | 111817529   | +               | 9720        |             |
| protein_coding                     | aldehyde dehydrogenase 2 family member    |              |             |                 |             |             |
| [Source:HGNC Symbol;Acc:HGNC:404]  | -                                         | 0            | 0           | 0               | 0           |             |
| 0                                  | 26                                        | 0            | 0           | 0               | 0           |             |
| 0.164419924                        | 0                                         |              |             |                 |             |             |
| ENSG00000245904                    | 10.58041524                               | 6.09059783   | 5.582421991 | 0               |             |             |
| 0                                  | 0                                         | 7.417811687  | 0           | 5.232430776     |             |             |
| 0.041463                           | 1                                         | AC025164.1   | 12          | 92145573        |             |             |
| 92189660                           | +                                         | 7589         | antisense   | uncharacterized |             |             |
| LOC101928617                       | [Source:NCBI gene;Acc:101928617] - 11 7   |              |             |                 |             |             |
| 6                                  | 0                                         | 0            | 0           | 0.070082462     | 0.040195005 |             |
| 0.036907339                        | 0                                         | 0            | 0           |                 |             |             |
| ENSG00000285560                    | 20.19897455                               | 17.40170808  | 5.582421991 |                 |             |             |
| 3.306207466                        | 0                                         | 0            | 14.39436821 | 1.102069155     |             |             |
| 3.719861087                        | 0.041486587                               | 1            | AC103739.3  | 15              |             |             |
| 90630535                           | 90631755                                  | -            | 888         | antisense       | "novel      |             |



|                                                             |                                        |                         |                          |                |             |
|-------------------------------------------------------------|----------------------------------------|-------------------------|--------------------------|----------------|-------------|
| transcript, antisense to CRT3"                              | -                                      | 21                      | 20                       | 6              | 3           |
| 0                                                           | 0                                      | 1.143424637             | 0.981466832              | 0.315416436    |             |
| 0.18772423                                                  | 0                                      | 0                       |                          |                |             |
| ENSG00000154832                                             | 2488.321293                            | 2235.249404             | 2556.749272              |                |             |
| 2556.800441                                                 | 2943.00919                             | 3400.048047             | 2426.773323              |                |             |
| 2966.619226                                                 | -0.29015653                            | 0.041570155             | 0.250238705              | CXXC1          |             |
| 18                                                          | 50282343                               | 50288304                | -                        | 4319           |             |
| protein_coding                                              | CXXC finger protein 1 [Source:HGNC     |                         |                          |                |             |
| Symbol;Acc:HGNC:24343]                                      | -                                      | 2587                    | 2569                     | 2748           | 2320        |
| 3683                                                        | 28.96105919                            | 25.92026862             | 29.70158052              |                | 2428        |
| 29.84810917                                                 | 34.55515446                            | 39.65057895             |                          |                |             |
| ENSG00000270580                                             | 48.09279655                            | 13.05128106             | 35.35533928              |                |             |
| 11.02069155                                                 | 7.272675098                            | 0                       | 32.1664723               | 6.097788884    |             |
| 2.413358798                                                 | 0.041591544                            | 1                       | PKD1P6-NPIPP1            | 16             |             |
| 15104723                                                    | 15131601                               | -                       | 3043                     |                |             |
| processed_transcript                                        | PKD1P6-NPIPP1 readthrough [Source:NCBI |                         |                          |                |             |
| gene;Acc:105369154]                                         | -                                      | 50                      | 15                       | 38             | 10          |
| 0                                                           | 0.794454937                            | 0.21480674              | 0.582945132              |                | 6           |
| 0.182603918                                                 | 0.121198336                            | 0                       |                          |                |             |
| ENSG00000178896                                             | 1688.057159                            | 1891.565669             | 2109.225109              |                |             |
| 1763.310649                                                 | 2441.194608                            | 3280.958664             | 1896.282646              |                |             |
| 2495.15464                                                  | -0.396340605                           | 0.041630038             | 1                        | EXOSC4         | 8           |
| 144078626                                                   | 144080647                              | +                       | 1407                     | protein_coding |             |
| exosome component 4 [Source:HGNC                            | Symbol;Acc:HGNC:18189]                 | -                       |                          |                |             |
| 1755                                                        | 2174                                   | 2267                    | 1600                     | 2014           | 3554        |
| 67.33239152                                                 | 75.21482658                            | 63.18848296             | 87.98582873              |                |             |
| 117.4503578                                                 |                                        |                         |                          |                |             |
| ENSG00000131737                                             | 0                                      | 3.480341617             | 1.86080733               | 8.816553243    |             |
| 1.212112516                                                 | 45.23550212                            | 1.780382982             | 18.42138929              |                |             |
| -3.365683915                                                | 0.041687489                            | 1                       | KRT34                    | 17             |             |
| 41377650                                                    | 41382403                               | -                       | 1751                     | protein_coding |             |
| keratin 34 [Source:HGNC                                     | Symbol;Acc:HGNC:6452]                  | -                       | 0                        | 4              |             |
| 2                                                           | 8                                      | 1                       | 49                       | 0              | 0.099547978 |
| 0.053319969                                                 | 0.253872631                            | 0.035104372             | 1.301190704              |                |             |
| ENSG00000166592                                             | 16.35155083                            | 25.23247672             | 28.84251362              |                |             |
| 102.4924315                                                 | 38.78760052                            | 46.15867564             | 23.47551372              |                |             |
| 62.4795692                                                  | -1.411295801                           | 0.041731176             | 1                        | RRAD           | 16          |
| 66921679                                                    | 66925644                               | -                       | 1709                     | protein_coding |             |
| "RRAD, Ras related glycolysis inhibitor and calcium channel | regulator [Source:HGNC                 | Symbol;Acc:HGNC:10446]" | -                        | 17             | 29          |
| 31                                                          | 93                                     | 32                      | 50                       | 0.480959021    | 0.739459739 |
| 0.846770397                                                 | 3.023799072                            | 1.150946869             | 1.360375995              |                |             |
| ENSG00000228634                                             | 39.43609317                            | 0                       | 14.88645864              | 3.306207466    |             |
| 0                                                           | 0                                      | 18.10751727             | 1.102069155              | 4.047854792    |             |
| 0.041736817                                                 | 1                                      | AL136115.1              | 1                        | 31933020       |             |
| 31933975                                                    | +                                      | 517                     | lincRNA novel transcript |                |             |
| -                                                           | 41                                     | 0                       | 16                       | 3              | 0           |
| 3.834374521                                                 | 0                                      | 1.44469269              | 0.322435429              | 0              | 0           |
| ENSG00000104419                                             | 36200.40982                            | 48558.59633             | 49890.10533              |                |             |
| 27459.15508                                                 | 43015.44898                            | 37405.14439             | 44883.03716              |                |             |

|                                                                  |                                                   |                        |                                   |                |
|------------------------------------------------------------------|---------------------------------------------------|------------------------|-----------------------------------|----------------|
| 35959.91615                                                      | 0.319797919                                       | 0.04174234             | 0.250454041                       | NDRG1          |
| 8                                                                | 133237171                                         | 133302022              | - 9823                            |                |
| protein_coding                                                   | N-myc downstream regulated 1 [Source:HGNC         |                        |                                   |                |
| Symbol;Acc:HGNC:7679]                                            | -                                                 | 37636 55809            | 53622 24916                       | 35488          |
| 40518                                                            | 185.2509878                                       | 247.5817877            | 254.8266824                       |                |
| 140.9438796                                                      | 222.0673656                                       | 191.793937             |                                   |                |
| ENSG00000102034                                                  | 1141.72299                                        | 1185.926406            | 1237.436875                       |                |
| 1376.484375                                                      | 1764.835824                                       | 1344.140635            | 1188.36209                        |                |
| 1495.153611                                                      | -0.330653495                                      | 0.041780654            | 1                                 | ELF4 X         |
| 130064874                                                        | 130110716                                         | -                      | 4316                              | protein_coding |
| E74 like ETS transcription factor 4 [Source:HGNC                 |                                                   |                        |                                   |                |
| Symbol;Acc:HGNC:3319]                                            | ETS                                               | 1187 1363              | 1330 1249                         | 1456           |
| 1456                                                             | 13.29751532                                       | 13.76172951            | 14.38521114                       |                |
| 16.08025924                                                      | 20.73611053                                       | 15.68595472            |                                   |                |
| ENSG00000222365                                                  | 7.694847448                                       | 0 19.53847697          | 0 0                               |                |
| 0                                                                | 9.077774806                                       | 0 5.523503018          | 0.041790819                       |                |
| 1                                                                | SNORD12B                                          | 20 49280319            | 49280409                          |                |
| +                                                                | 91                                                | snoRNA                 | "small nucleolar RNA, C/D box 12B |                |
| [Source:HGNC Symbol;Acc:HGNC:33573]"                             | -                                                 | 8                      | 0                                 | 21             |
| 0                                                                | 0                                                 | 4.250595823            | 0                                 | 10.77268444    |
| 0                                                                | 0                                                 | 0                      |                                   |                |
| ENSG00000248916                                                  | 24.04639827                                       | 0 3.721614661          | 0 0                               |                |
| 0                                                                | 9.256004311                                       | 0 5.550925854          | 0.041871969                       |                |
| 1                                                                | NUP210P3                                          | 3 129323046            | 129325426                         |                |
| -                                                                | 388                                               | unprocessed_pseudogene | nucleoporin 210                   |                |
| pseudogene 3 [Source:HGNC Symbol;Acc:HGNC:42712]                 | -                                                 |                        |                                   | 25             |
| 0                                                                | 4                                                 | 0 0                    | 0 0                               | 3.115369039 0  |
| 0.481253944                                                      | 0                                                 | 0                      | 0                                 |                |
| ENSG00000080947                                                  | 92.33816937                                       | 78.30768638            | 60.47623824                       |                |
| 13.22482987                                                      | 59.3935133                                        | 7.385388102            | 77.040698                         |                |
| 26.66791042                                                      | 1.541683391                                       | 0.041878069            | 1                                 | CROCCP3 1      |
| 16467436                                                         | 16499257                                          | -                      | 6813                              |                |
| transcribed_unprocessed_pseudogene "ciliary rootlet coiled-coil, |                                                   |                        |                                   |                |
| rootletin pseudogene 3 [Source:HGNC Symbol;Acc:HGNC:29405]" -    |                                                   |                        |                                   |                |
| 96                                                               | 90                                                | 65 12                  | 49 8                              | 0.68129321     |
| 0.575655579                                                      | 0.445370045                                       | 0.097871197            | 0.442084259                       |                |
| 0.054598739                                                      |                                                   |                        |                                   |                |
| ENSG00000116688                                                  | 4132.133079                                       | 4095.491998            | 3856.523192                       |                |
| 4409.378691                                                      | 4801.177677                                       | 4959.28811             | 4028.049423                       |                |
| 4723.281493                                                      | -0.229784846                                      | 0.041950676            | 0.250533572                       | MFN2           |
| 1                                                                | 11980181                                          | 12013514               | +                                 | 4973           |
| protein_coding                                                   | mitofusin 2 [Source:HGNC Symbol;Acc:HGNC:16877] - |                        |                                   |                |
| 4296                                                             | 4707                                              | 4145 4001              | 3961 5372                         | 41.76832216    |
| 41.24623737                                                      | 38.90918298                                       | 44.70562139            | 48.95913581                       |                |
| 50.22830964                                                      |                                                   |                        |                                   |                |
| ENSG00000136982                                                  | 789.6837193                                       | 689.9777256            | 734.0884918                       |                |
| 1228.807108                                                      | 924.8418499                                       | 788.3901799            | 737.9166456                       |                |
| 980.6797127                                                      | -0.409973168                                      | 0.041975017            | 1                                 | DSCC1 8        |
| 119833976                                                        | 119856010                                         | -                      | 2603                              | protein_coding |
| DNA replication and sister chromatid cohesion 1 [Source:HGNC     |                                                   |                        |                                   |                |

|                                                               |              |             |             |             |                  |             |
|---------------------------------------------------------------|--------------|-------------|-------------|-------------|------------------|-------------|
| Symbol;Acc:HGNC:24453]                                        | -            | 821         | 793         | 789         | 1115             | 763         |
| 854                                                           | 15.25001271  | 13.27570572 |             | 14.14975339 |                  |             |
| 23.8019612                                                    | 18.01763273  | 15.25508812 |             |             |                  |             |
| ENSG00000229539                                               | 22.12268641  | 8.700854042 |             | 13.02565131 |                  | 0           |
| 3.636337549                                                   | 0            | 14.61639726 |             | 1.212112516 |                  |             |
| 3.651908859                                                   | 0.042005249  | 1           | AL353194.1  | 20          |                  |             |
| 3888239                                                       | 3888868      | -           | 441         | antisense   | novel transcript |             |
| -                                                             | 23           | 10          | 14          | 0           | 3                | 0           |
| 2.52168284                                                    | 0.988143477  | 1.481956589 |             | 0           | 0.418148001      |             |
| 0                                                             |              |             |             |             |                  |             |
| ENSG00000126107                                               | 1195.586922  | 1274.675117 |             | 1183.473462 |                  |             |
| 1937.437575                                                   | 1530.898108  | 1237.052507 |             | 1217.911834 |                  |             |
| 1568.46273                                                    | -0.364415263 | 0.04201397  |             | 1           | HECTD3           | 1           |
| 45002540                                                      | 45011329     | -           |             | 5077        | protein_coding   |             |
| HECT domain E3 ubiquitin protein ligase 3 [Source:HGNC        |              |             |             |             |                  |             |
| Symbol;Acc:HGNC:26117]                                        | -            | 1243        | 1465        | 1272        | 1758             | 1263        |
| 1340                                                          | 11.83764146  | 12.57445176 |             | 11.69569364 |                  |             |
| 19.24082772                                                   | 15.29126967  | 12.27237601 |             |             |                  |             |
| ENSG00000154277                                               | 5955.811924  | 4659.30734  |             | 6018.78131  |                  |             |
| 6302.7335                                                     | 6462.983937  | 7203.52292  |             | 5544.633525 |                  |             |
| 6656.413452                                                   | -0.263845247 | 0.042028508 |             | 0.250533572 |                  | UCHL1       |
| 4                                                             | 41256413     | 41268455    |             | +           | 2282             |             |
| protein_coding ubiquitin C-terminal hydrolase L1 [Source:HGNC |              |             |             |             |                  |             |
| Symbol;Acc:HGNC:12513]                                        | -            | 6192        | 5355        | 6469        | 5719             | 5332        |
| 7803                                                          | 131.1947705  | 102.2592099 |             | 132.3328138 |                  |             |
| 139.2568285                                                   | 143.6222946  | 158.9926269 |             |             |                  |             |
| ENSG00000144426                                               | 336.6495758  | 219.2615219 |             | 201.8975953 |                  |             |
| 191.760033                                                    | 133.3323768  | 142.168721  |             | 252.6028977 |                  |             |
| 155.7537103                                                   | 0.697185713  | 0.042060941 |             | 1           | NBEAL1           | 2           |
| 203014879                                                     | 203226378    | +           |             | 16376       | protein_coding   |             |
| neurobeachin like 1 [Source:HGNC Symbol;Acc:HGNC:20681]       |              |             |             |             |                  |             |
| 350                                                           | 252          | 217         | 174         | 110         | 154              | 1.033383282 |
| 0.6705811                                                     | 0.618582942  | 0.59040967  |             | 0.412887957 |                  |             |
| 0.437264187                                                   |              |             |             |             |                  |             |
| ENSG00000269881                                               | 21.16083048  | 6.09059783  |             | 0           | 0                | 0           |
| 0                                                             | 9.083809437  | 0           | 5.524391366 | 0.042094953 |                  |             |
| 1                                                             | AC004754.1   | 16          | 249547      | 269943      | +                | 2242        |
| protein_coding family with sequence similarity 234 member A   |              |             |             |             |                  |             |
| [Source:NCBI gene;Acc:83986]                                  | -            | 22          | 7           | 0           | 0                |             |
| 0                                                             | 0            | 0.474447638 | 0.136057043 | 0           | 0                |             |
| 0                                                             | 0            |             |             |             |                  |             |
| ENSG00000134318                                               | 1681.324167  | 1658.38278  |             | 1715.664359 |                  |             |
| 1570.448546                                                   | 1333.323768  | 1143.811982 |             | 1685.123769 |                  |             |
| 1349.194766                                                   | 0.321253963  | 0.042288147 |             | 1           | ROCK2            | 2           |
| 11179761                                                      | 11348330     | -           |             | 10145       | protein_coding   |             |
| Rho associated coiled-coil containing protein kinase 2        |              |             |             |             |                  |             |
| [Source:HGNC Symbol;Acc:HGNC:10252]                           | -            |             |             | 1748        | 1906             | 1844        |
| 1425                                                          | 1100         | 1239        | 8.330874525 | 8.187087702 |                  |             |
| 8.485059678                                                   | 7.805035031  | 6.66481339  |             | 5.678717615 |                  |             |
| ENSG00000163961                                               | 1082.087922  | 908.369162  |             | 912.7259956 |                  |             |

|                                   |                                               |                        |                        |                |              |      |
|-----------------------------------|-----------------------------------------------|------------------------|------------------------|----------------|--------------|------|
| 856.3077338                       | 671.510334                                    | 714.5362989            | 967.7276933            |                |              |      |
| 747.4514555                       | 0.37238469                                    | 0.042289525            | 1                      | RNF168         | 3            |      |
| 196468783                         | 196503768                                     | -                      | 5347                   | protein_coding |              |      |
|                                   | ring finger protein 168                       | [Source:HGNC           | Symbol;Acc:HGNC:26661] |                |              |      |
| -                                 | 1125                                          | 1044                   | 981                    | 777            | 554          | 774  |
| 10.17287141                       | 8.508419854                                   | 8.564556113            | 8.074634599            |                |              |      |
| 6.368643528                       | 6.730724193                                   |                        |                        |                |              |      |
| ENSG00000221230                   | 33.66495758                                   | 0                      | 0                      | 0              | 0            | 0    |
| 11.22165253                       | 0                                             | 5.828982673            | 0.042291615            |                |              | 1    |
| MIR548L                           | 11                                            | 94466495               | 94466580               | -              |              | 86   |
| miRNA                             | microRNA 548l                                 | [Source:HGNC           | Symbol;Acc:HGNC:35292] |                |              |      |
| -                                 | 35                                            | 0                      | 0                      | 0              | 0            |      |
| 19.67754026                       | 0                                             | 0                      | 0                      | 0              |              |      |
| ENSG00000202399                   | 33.66495758                                   | 0                      | 0                      | 0              | 0            | 0    |
| 11.22165253                       | 0                                             | 5.828982673            | 0.042291615            |                |              | 1    |
| RF00019                           | 8                                             | 97772313               | 97772425               | +              |              | 113  |
| misc_RNA                          |                                               | -                      | 35                     | 0              | 0            | 0    |
| 0                                 | 0                                             | 14.9758271             | 0                      | 0              | 0            | 0    |
| 0                                 |                                               |                        |                        |                |              |      |
| ENSG00000214097                   | 33.66495758                                   | 0                      | 0                      | 0              | 0            | 0    |
| 11.22165253                       | 0                                             | 5.828982673            | 0.042291615            |                |              | 1    |
| SMC01                             | 3                                             | 196506877              | 196515366              | -              |              | 1868 |
| protein_coding                    | single-pass membrane protein with coiled-coil |                        |                        |                |              |      |
| domains 1                         | [Source:HGNC                                  | Symbol;Acc:HGNC:27407] | -                      | 35             |              | 0    |
| 0                                 | 0                                             | 0                      | 0                      | 0.905925301    | 0            | 0    |
| 0                                 | 0                                             | 0                      |                        |                |              |      |
| ENSG00000210154                   | 12.5041271                                    | 12.18119566            | 18.6080733             |                |              | 0    |
| 3.636337549                       | 0                                             | 14.43113202            | 1.212112516            |                |              |      |
| 3.634484259                       | 0.042307504                                   | 1                      | MT-TD                  | MT             | 7518         | 7585 |
| +                                 | 68                                            | Mt_tRNA                | mitochondrially        | encoded tRNA   | aspartic     |      |
| acid                              | [Source:HGNC                                  | Symbol;Acc:HGNC:7478]  | -                      | 13             | 14           | 20   |
| 0                                 | 3                                             | 0                      | 9.243483197            | 8.971761514    |              |      |
| 13.72989193                       | 0                                             | 2.711812774            | 0                      |                |              |      |
| ENSG00000164749                   | 8.656703379                                   | 6.960683234            | 31.63372462            |                |              |      |
| 77.14484088                       | 18.18168774                                   | 64.62214589            | 15.75037041            |                |              |      |
| 53.31622484                       | -1.762152732                                  | 0.04246823             | 1                      | HNF4G          | 8            |      |
| 75407914                          | 75566843                                      | +                      | 4806                   | protein_coding |              |      |
| hepatocyte nuclear factor 4 gamma | [Source:HGNC                                  |                        |                        |                |              |      |
| Symbol;Acc:HGNC:5026]             | RXR-like                                      | 9                      | 8                      | 34             |              | 70   |
| 15                                | 70                                            | 0.090544059            | 0.072537873            | 0.330248753    |              |      |
| 0.809331264                       | 0.19184693                                    | 0.677244196            |                        |                |              |      |
| ENSG00000143512                   | 14.42783896                                   | 4.350427021            | 3.721614661            |                |              | 0    |
| 0                                 | 0                                             | 7.499960215            | 0                      | 5.247832544    |              |      |
| 0.042472324                       | 1                                             | HHIPL2                 | 1                      | 222522258      | 222548103    |      |
| -                                 | 3289                                          | protein_coding         | HHIP                   | like 2         | [Source:HGNC |      |
| Symbol;Acc:HGNC:25842]            | -                                             | 15                     | 5                      | 4              | 0            | 0    |
| 0                                 | 0.220510159                                   | 0.066246773            | 0.056773041            |                |              | 0    |
| 0                                 | 0                                             |                        |                        |                |              |      |
| ENSG00000259039                   | 14.42783896                                   | 4.350427021            | 3.721614661            |                |              | 0    |
| 0                                 | 0                                             | 7.499960215            | 0                      | 5.247832544    |              |      |

|                                                              |                                                       |                      |             |                      |                |       |   |
|--------------------------------------------------------------|-------------------------------------------------------|----------------------|-------------|----------------------|----------------|-------|---|
| 0.042472324                                                  | 1                                                     | AL161804.1           | 14          | 57578409             |                |       |   |
| 57600404                                                     | +                                                     | 1430                 | antisense   | "novel transcript,   |                |       |   |
| antisense to SLC35F4"                                        | -                                                     | 15                   | 5           | 4                    | 0              | 0     |   |
| 0                                                            | 0.507173365                                           | 0.152367578          |             | 0.130577993          | 0              |       |   |
| 0                                                            | 0                                                     |                      |             |                      |                |       |   |
| ENSG00000141741                                              | 204.8753133                                           | 354.1247595          |             | 340.5277415          |                |       |   |
| 308.5793635                                                  | 597.5714705                                           | 480.0502266          |             | 299.8426048          |                |       |   |
| 462.0670202                                                  | -0.6230212                                            | 0.042577979          |             | 1                    | MIEN1          | 17    |   |
| 39728496                                                     | 39730787                                              | -                    |             | 2292                 | protein_coding |       |   |
| migration and invasion enhancer 1 [Source:HGNC               |                                                       |                      |             |                      |                |       |   |
| Symbol;Acc:HGNC:28230]                                       | -                                                     | 213                  | 407         | 366                  | 280            | 493   |   |
| 520                                                          | 4.493308183                                           | 7.738172266          |             | 7.454396822          |                |       |   |
| 6.788213009                                                  | 13.22146763                                           | 10.5492054           |             |                      |                |       |   |
| ENSG00000100991                                              | 2933.660589                                           | 2812.116027          |             | 2718.63951           |                |       |   |
| 2905.054294                                                  | 3581.792486                                           | 3729.620991          |             | 2821.472042          |                |       |   |
| 3405.489257                                                  | -0.271557812                                          | 0.042594663          |             | 0.251427816          |                |       |   |
| TRPC4AP 20                                                   | 35002404                                              | 35092871             |             | -                    | 3226           |       |   |
| protein_coding                                               | transient receptor potential cation channel subfamily |                      |             |                      |                |       |   |
| C member 4 associated protein [Source:HGNC                   | Symbol;Acc:HGNC:16181]                                |                      |             |                      |                |       |   |
| -                                                            | 3050                                                  | 3232                 | 2922        | 2636                 | 2955           | 4040  |   |
| 45.71268098                                                  | 43.65817595                                           | 42.28261944          |             | 45.40389248          |                |       |   |
| 56.30415984                                                  | 58.23016493                                           |                      |             |                      |                |       |   |
| ENSG00000132507                                              | 8418.163108                                           | 8701.724128          |             | 8818.365939          |                |       |   |
| 9510.856811                                                  | 9452.053402                                           | 11453.81377          |             | 8646.084391          |                |       |   |
| 10138.908                                                    | -0.22993316                                           | 0.042627239          |             | 0.251427816          |                | EIF5A |   |
| 17                                                           | 7306999                                               | 7312463              | +           | 2815                 | protein_coding |       |   |
| eukaryotic translation initiation factor 5A [Source:HGNC     |                                                       |                      |             |                      |                |       |   |
| Symbol;Acc:HGNC:3300]                                        | -                                                     | 8752                 | 10001       | 9478                 | 8630           | 7798  |   |
| 12407                                                        | 150.324624                                            | 154.8187747          |             | 157.1753156          |                |       |   |
| 170.3509031                                                  | 170.2755108                                           | 204.9365407          |             |                      |                |       |   |
| ENSG00000230683                                              | 0                                                     | 0                    | 0.930403665 | 0                    | 0              |       |   |
| 37.85011402                                                  | 0.310134555                                           | 12.61670467          |             | -5.26299291          |                |       |   |
| 0.042631691                                                  | 1                                                     | DDTP1                | 3           | 38515448             | 38515830       |       |   |
| -                                                            | 383                                                   | processed_pseudogene |             | D-dopachrome         |                |       |   |
| tautomerase pseudogene 1 [Source:HGNC Symbol;Acc:HGNC:44546] |                                                       |                      |             |                      |                |       |   |
| 0                                                            | 0                                                     | 1                    | 0           | 0                    | 41             | 0     | 0 |
| 0.121884158                                                  | 0                                                     | 0                    | 4.977555382 |                      |                |       |   |
| ENSG00000198625                                              | 1421.623066                                           | 1274.675117          |             | 1277.444232          |                |       |   |
| 1066.802942                                                  | 1123.628303                                           | 1021.953079          |             | 1324.580805          |                |       |   |
| 1070.794775                                                  | 0.307118268                                           | 0.042669569          |             | 1                    | MDM4           | 1     |   |
| 204516379                                                    | 204558120                                             | +                    |             | 11008                | protein_coding |       |   |
| "MDM4, p53 regulator [Source:HGNC Symbol;Acc:HGNC:6974]"     |                                                       |                      |             |                      |                |       |   |
| -                                                            | 1478                                                  | 1465                 | 1373        | 968                  | 927            | 1107  |   |
| 6.491831362                                                  | 5.799463261                                           | 5.822481968          |             | 4.88628709           |                |       |   |
| 5.176290881                                                  | 4.675953871                                           |                      |             |                      |                |       |   |
| ENSG00000231210                                              | 0                                                     | 14.79145187          | 35.35533928 | 0                    | 0              |       |   |
| 2.769520538                                                  | 16.71559705                                           | 0.923173513          |             | 4.112471786          |                |       |   |
| 0.042752234                                                  | 1                                                     | LINC01510            | 7           | 116563594            |                |       |   |
| 116663829                                                    | -                                                     | 1691                 | lincRNA     | long intergenic non- |                |       |   |
| protein coding RNA 1510 [Source:HGNC Symbol;Acc:HGNC:51196]  |                                                       |                      |             |                      |                |       |   |

|                               |                                           |         |             |       |                |                |       |
|-------------------------------|-------------------------------------------|---------|-------------|-------|----------------|----------------|-------|
| 0                             | 17                                        | 38      | 0           | 0     | 3              | 0              |       |
| 0.438090577                   | 1.049025451                               |         | 0           | 0     | 0.082491398    |                |       |
| ENSG00000159377               | 5785.563425                               |         | 6427.320881 |       | 5855.960669    |                |       |
| 6619.027347                   | 7094.494558                               |         | 7339.229426 |       | 6022.948325    |                |       |
| 7017.583777                   | -0.220511385                              |         | 0.042791319 |       | 0.251427816    |                | PSMB4 |
| 1                             | 151399534                                 |         | 151401944   |       | +              | 2158           |       |
| protein_coding                | proteasome subunit beta 4 [Source:HGNC    |         |             |       |                |                |       |
| Symbol;Acc:HGNC:9541]         | -                                         |         | 6015        | 7387  | 6294           | 6006           | 5853  |
| 7950                          | 134.7675732                               |         | 149.167859  |       | 136.1511563    |                |       |
| 154.6485781                   | 166.7149106                               |         | 171.2957968 |       |                |                |       |
| ENSG00000128165               | 171.2103557                               |         | 167.0563976 |       | 124.6740911    |                |       |
| 110.2069155                   | 84.84787614                               |         | 65.5453194  |       | 154.3136148    |                |       |
| 86.8667037                    | 0.830898829                               |         | 0.042795312 |       | 1              | ADM2           | 22    |
| 50481556                      | 50486440                                  |         | +           |       | 4276           | protein_coding |       |
| adrenomedullin 2 [Source:HGNC | Symbol;Acc:HGNC:28898]                    |         |             |       |                | -              |       |
| 178                           | 192                                       | 134     | 100         | 70    | 71             | 2.012720742    |       |
| 1.956690471                   | 1.46289494                                |         | 1.299494205 |       | 1.006254194    |                |       |
| 0.772061098                   |                                           |         |             |       |                |                |       |
| ENSG00000175741               | 159.6680845                               |         | 97.44956528 |       | 99.55319218    |                |       |
| 217.1076236                   | 232.7256031                               |         | 155.0931501 |       | 118.8902807    |                |       |
| 201.6421256                   | -0.761631923                              |         | 0.042796304 |       | 1              | RWDD4P2        | 7     |
| 39854494                      | 39855056                                  |         | -           |       | 563            |                |       |
| processed_pseudogene          | RWD domain containing 4                   |         |             |       |                | pseudogene 2   |       |
| [Source:HGNC                  | Symbol;Acc:HGNC:23754]                    |         |             |       |                | 166            | 112   |
| 197                           | 192                                       | 168     | 14.2561058  |       | 8.668984482    |                | 107   |
| 8.871997661                   | 19.44329542                               |         | 20.96236091 |       | 13.87496528    |                |       |
| ENSG00000110955               | 8482.607455                               |         | 9197.672808 |       | 9180.292964    |                |       |
| 10066.29967                   | 10873.86138                               |         | 10070.89985 |       | 8953.524409    |                |       |
| 10337.0203                    | -0.207205717                              |         | 0.042808673 |       | 0.251427816    |                |       |
| ATP5F1B 12                    | 56638175                                  |         | 56646068    |       | -              | 2322           |       |
| protein_coding                | ATP synthase F1 subunit beta [Source:HGNC |         |             |       |                |                |       |
| Symbol;Acc:HGNC:830]          | -                                         |         | 8819        | 10571 | 9867           | 9134           | 8971  |
| 10909                         | 183.6362196                               |         | 198.3866551 |       | 198.3667823    |                |       |
| 218.5802083                   | 237.479432                                |         | 218.4508528 |       |                |                |       |
| ENSG00000111186               | 2265.170717                               |         | 2317.907517 |       | 2559.540483    |                |       |
| 2988.811549                   | 2721.192599                               |         | 2805.524305 |       | 2380.872906    |                |       |
| 2838.509485                   | -0.253680862                              |         | 0.042863239 |       | 0.251427816    |                | WNT5B |
| 12                            | 1529891                                   | 1647243 | +           | 4305  | protein_coding |                | Wnt   |
| family member 5B [Source:HGNC | Symbol;Acc:HGNC:16265]                    |         |             |       |                | -              | 2355  |
| 2664                          | 2751                                      | 2712    | 2245        | 3039  | 26.44959169    |                |       |
| 26.96619449                   | 29.83070178                               |         | 35.00487838 |       | 32.05461387    |                |       |
| 32.82377768                   |                                           |         |             |       |                |                |       |
| ENSG00000227615               | 66.36805924                               |         | 82.6581134  |       | 62.33704557    |                |       |
| 120.1255379                   | 95.75688879                               |         | 180.9420085 |       | 70.45440607    |                |       |
| 132.2748117                   | -0.910650229                              |         | 0.042892223 |       | 1              | AP001324.1     |       |
| 11                            | 74745716                                  |         | 74746114    |       | -              | 399            |       |
| processed_pseudogene          | ribosomal protein S12 (RPS12)             |         |             |       |                | pseudogene     |       |
| -                             | 69                                        | 95      | 67          | 109   | 79             | 196            |       |
| 8.361369416                   | 10.37550651                               |         | 7.838770379 |       | 15.17978589    |                |       |
| 12.17030762                   | 22.84095161                               |         |             |       |                |                |       |

|                                                               |                |                         |             |                |                |             |
|---------------------------------------------------------------|----------------|-------------------------|-------------|----------------|----------------|-------------|
| ENSG00000114346                                               | 1026.300278    | 1239.001616             | 1180.682251 |                |                |             |
| 2014.582416                                                   | 1364.838693    | 1182.58527              | 1148.661382 |                |                |             |
| 1520.668793                                                   | -0.404318964   | 0.042912839             | 1           | ECT2           | 3              |             |
| 172750682                                                     | 172821474      | +                       | 5499        | protein_coding |                |             |
| epithelial cell transforming 2 [Source:HGNC                   |                |                         |             |                |                |             |
| Symbol;Acc:HGNC:3155]                                         | -              | 1067                    | 1424        | 1269           | 1828           | 1126        |
| 1281                                                          | 9.381708099    | 11.28456617             | 10.77268444 |                |                |             |
| 18.4716                                                       | 12.58641453    | 10.83169514             |             |                |                |             |
| ENSG00000198938                                               | 51884.43263    | 47980.85962             | 64653.75069 |                |                |             |
| 51726.71788                                                   | 73805.53112    | 77844.76011             | 54839.68098 |                |                |             |
| 67792.33637                                                   | -0.305912525   | 0.043007782             | 0.251472252 |                |                | MT-C03      |
| MT                                                            | 9207           | 9990                    | +           | 784            | protein_coding |             |
| mitochondrially encoded cytochrome c oxidase III [Source:HGNC |                |                         |             |                |                |             |
| Symbol;Acc:HGNC:7422]                                         | -              | 53942                   | 55145       | 69490          | 46936          | 60890       |
| 84323                                                         | 3326.688972    | 3065.128428             | 4137.636028 |                |                |             |
| 3326.611283                                                   | 4773.943465    | 5001.04779              |             |                |                |             |
| ENSG00000177182                                               | 15.3896949     | 11.31111026             | 0           | 0              | 0              |             |
| 0                                                             | 8.900268383    | 0                       | 5.495608779 | 0.043090707    |                |             |
| 1                                                             | CLVS1          | 8                       | 61057158    | 61501645       |                | +           |
| 7393                                                          | protein_coding | clavesin 1 [Source:HGNC |             |                |                |             |
| Symbol;Acc:HGNC:23139]                                        | -              | 16                      | 13          | 0              | 0              | 0           |
| 0                                                             | 0.104640665    | 0.076626898             | 0           | 0              | 0              |             |
| 0                                                             |                |                         |             |                |                |             |
| ENSG00000280042                                               | 11.54227117    | 6.960683234             | 8.373632987 |                |                |             |
| 1.102069155                                                   | 0              | 0                       | 8.958862464 | 0.367356385    |                |             |
| 4.542930785                                                   | 0.043098808    | 1                       | AC022336.3  | 3              |                |             |
| 124791119                                                     | 124793104      | -                       | 1986        | TEC            | TEC            | -           |
| 12                                                            | 8              | 9                       | 1           | 0              | 0              | 0.292148202 |
| 0.17553727                                                    | 0.211548184    | 0.027979039             | 0           | 0              |                |             |
| ENSG00000204394                                               | 7107.153474    | 5156.996191             | 6598.422794 |                |                |             |
| 6412.940415                                                   | 7854.489106    | 9024.94426              | 6287.524153 |                |                |             |
| 7764.124594                                                   | -0.304506539   | 0.043254333             | 0.251521614 |                |                | VARs        |
| 6                                                             | 31777518       | 31795953                | -           | 6081           |                |             |
| protein_coding valyl-tRNA synthetase [Source:HGNC             |                |                         |             |                |                |             |
| Symbol;Acc:HGNC:12651]                                        | -              | 7389                    | 5927        | 7092           | 5819           | 6480        |
| 9776                                                          | 58.75054229    | 42.4735461              | 54.44271305 |                |                |             |
| 53.17229401                                                   | 65.50091437    | 74.75103454             |             |                |                |             |
| ENSG00000111247                                               | 165.4392201    | 304.5298915             | 240.0441456 |                |                |             |
| 465.0731836                                                   | 355.1489673    | 282.4910949             | 236.6710857 |                |                |             |
| 367.5710819                                                   | -0.633672224   | 0.043265335             | 1           | RAD51AP1       |                |             |
| 12                                                            | 4538798        | 4560048                 | +           | 2558           | protein_coding | RAD51       |
| associated protein 1 [Source:HGNC Symbol;Acc:HGNC:16956]      |                |                         |             |                |                |             |
| 172                                                           | 350            | 258                     | 422         | 293            | 306            | 3.251090981 |
| 5.962468559                                                   | 4.708311649    | 9.166930832             | 7.040677315 |                |                |             |
| 5.562267928                                                   |                |                         |             |                |                |             |
| ENSG00000143786                                               | 2395.021268    | 2406.656228             | 2107.364302 |                |                |             |
| 1571.550616                                                   | 1961.198051    | 2071.601363             | 2303.013933 |                |                |             |
| 1868.116677                                                   | 0.30173277     | 0.043347428             | 1           | CNIH3          | 1              |             |
| 224434660                                                     | 224740549      | +                       | 6386        | protein_coding |                |             |
| cornichon family AMPA receptor auxiliary protein 3            |                |                         |             |                |                |             |

|                                                            |              |             |                |                    |
|------------------------------------------------------------|--------------|-------------|----------------|--------------------|
| [Source:HGNC Symbol;Acc:HGNC:26802]                        | -            | 2490        | 2766           | 2265               |
| 1426                                                       | 1618         | 2244        | 18.8526172     | 18.87477831        |
| 16.55714027                                                | 12.40802486  | 15.57388499 | 16.33898058    |                    |
| ENSG00000214842                                            | 14.42783896  | 5.220512425 | 2.791210996    | 0                  |
| 0                                                          | 0            | 7.479854128 | 0              | 5.244079412        |
| 0.043351451                                                | 1            | RAD51AP2    | 2              | 17510584           |
| 17518439                                                   | -            | 3724        | protein_coding | RAD51 associated   |
| protein 2 [Source:HGNC Symbol;Acc:HGNC:34417]              | -            | 15          | 6              |                    |
| 3                                                          | 0            | 0           | 0              | 0.194752393        |
| 0.037606041                                                | 0            | 0           | 0              | 0.070210194        |
| ENSG00000061987                                            | 1294.658083  | 1003.208471 | 1082.059463    |                    |
| 898.1863617                                                | 967.265788   | 764.3876685 | 1126.642006    |                    |
| 876.6132727                                                | 0.362611564  | 0.043415963 | 1              | MON2 12            |
| 62466817                                                   | 62600479     | +           | 16017          | protein_coding     |
| "MON2 homolog, regulator of endosome-to-Golgi trafficking  |              |             |                |                    |
| [Source:HGNC Symbol;Acc:HGNC:29177]"                       | -            | 1346        | 1153           | 1163               |
| 815                                                        | 798          | 828         | 4.063171006    | 3.136943737        |
| 3.389569748                                                | 2.827407963  | 3.062450488 | 2.403699534    |                    |
| ENSG00000186416                                            | 1245.603431  | 1185.926406 | 1121.136417    |                    |
| 1409.54645                                                 | 1301.808843  | 1759.568715 | 1184.222084    |                    |
| 1490.308003                                                | -0.332468491 | 0.043435948 | 1              | NKRF X             |
| 119588337                                                  | 119606443    | -           | 4552           | protein_coding     |
| NFKB repressing factor [Source:HGNC Symbol;Acc:HGNC:19374] |              |             |                |                    |
| Others                                                     | 1295         | 1363        | 1205           | 1279               |
| 13.75525771                                                | 13.04824793  | 12.35750598 | 1074           | 1906               |
| 14.50271753                                                | 19.46935935  |             | 15.6127834     |                    |
| ENSG00000034152                                            | 1923.711862  | 1513.078518 | 2144.580448    |                    |
| 1998.051379                                                | 2263.014068  | 2858.145195 | 1860.456943    |                    |
| 2373.070214                                                | -0.351631047 | 0.043478599 | 1              | MAP2K3 17          |
| 21284672                                                   | 21315240     | +           | 3783           | protein_coding     |
| mitogen-activated protein kinase kinase 3 [Source:HGNC     |              |             |                |                    |
| Symbol;Acc:HGNC:6843]                                      | -            | 2000        | 1739           | 2305               |
| 3096                                                       | 25.56200237  | 20.03188593 | 28.44334207    | 1813               |
| 26.63014348                                                | 30.33579193  | 38.05358949 |                | 1867               |
| ENSG00000227279                                            | 4.809279655  | 8.700854042 | 8.373632987    | 0                  |
| 0                                                          | 0            | 7.294588895 | 0              | 5.209056254        |
| 0.043571531                                                | 1            | AC110015.1  | 18             | 27954519           |
| 27963687                                                   | +            | 440         | antisense      | "novel transcript, |
| antisense to CDH2"                                         | -            | 5           | 10             | 9                  |
| 0                                                          | 0.549437812  | 0.990389258 | 0.954851575    | 0                  |
| 0                                                          | 0            |             |                |                    |
| ENSG00000280417                                            | 5.771135586  | 15.66153728 | 0              | 41.87862791        |
| 32.72703794                                                | 29.54155241  | 7.144224287 | 34.71573942    |                    |
| -2.274975303                                               | 0.043580904  | 1           | AC096887.2     | 3                  |
| 53046166                                                   | 53048122     | +           | 1957           | TEC                |
| -                                                          | 6            | 18          | 0              | 38                 |
| 0.148238715                                                | 0.400811595  | 0           | 1.078958684    | 0.848047735        |
| 0.760309069                                                |              |             |                |                    |
| ENSG00000137409                                            | 6152.030534  | 6597.85762  | 6100.656833    |                    |
| 6519.841123                                                | 7848.428543  | 7812.817438 | 6283.514996    |                    |



|                                                            |                                                   |                  |             |                |
|------------------------------------------------------------|---------------------------------------------------|------------------|-------------|----------------|
| 7393.695702                                                | -0.234717783                                      | 0.043586755      | 0.251521614 | MTCH1          |
| 6                                                          | 36968141                                          | 36986298         | - 3126      |                |
| protein_coding                                             | mitochondrial carrier 1 [Source:HGNC              |                  |             |                |
| Symbol;Acc:HGNC:17586]                                     | -                                                 | 6396 7583        | 6557 5916   | 6475           |
| 8463                                                       | 98.92833456                                       | 105.7086874      | 97.91793495 |                |
| 105.1601593                                                | 127.3204483                                       | 125.8827974      |             |                |
| ENSG00000158483                                            | 308.7557538                                       | 416.7709086      | 435.4289153 |                |
| 430.9090398                                                | 580.6018953                                       | 625.9116416      | 386.9851926 |                |
| 545.8075256                                                | -0.496196781                                      | 0.043626717      | 1           | FAM86C1 11     |
| 71787510                                                   | 71801236                                          | +                | 2972        | protein_coding |
| family with sequence similarity 86 member C1 [Source:HGNC  |                                                   |                  |             |                |
| Symbol;Acc:HGNC:25561]                                     | -                                                 | 321 479          | 468 391     | 479            |
| 678                                                        | 5.222247418                                       | 7.023366084      | 7.350943484 |                |
| 7.310380731                                                | 9.906815353                                       | 10.60747231      |             |                |
| ENSG00000149269                                            | 1644.773642                                       | 1848.931484      | 1706.360322 |                |
| 2205.24038                                                 | 2309.074344                                       | 1848.193372      | 1733.355149 |                |
| 2120.836032                                                | -0.290462833                                      | 0.043669068      | 1           | PAK1 11        |
| 77321707                                                   | 77474635                                          | -                | 6299        | protein_coding |
| p21 (RAC1) activated kinase 1 [Source:HGNC                 |                                                   |                  |             |                |
| Symbol;Acc:HGNC:8590]                                      | -                                                 | 1710 2125        | 1834 2001   | 1905           |
| 2002                                                       | 13.12579807                                       | 14.70096771      | 13.59169933 |                |
| 17.65174008                                                | 18.5896294                                        | 14.77826612      |             |                |
| ENSG00000076248                                            | 1490.876693                                       | 1376.47511       | 1662.63135  |                |
| 1760.004441                                                | 1693.321185                                       | 2186.998052      | 1509.994384 |                |
| 1880.107893                                                | -0.316939019                                      | 0.043670759      | 1           | UNG 12         |
| 109097574                                                  | 109110992                                         | +                | 2567        | protein_coding |
| uracil DNA glycosylase [Source:HGNC Symbol;Acc:HGNC:12572] |                                                   |                  |             |                |
| -                                                          | 1550 1582                                         | 1787 1597        | 1397 2369   |                |
| 29.19490363                                                | 26.8558689                                        | 32.49710844      | 34.56934024 |                |
| 33.45167723                                                | 42.91115559                                       |                  |             |                |
| ENSG00000178031                                            | 1407.195227                                       | 1232.911018      | 1322.103608 |                |
| 1081.129841                                                | 1092.113377                                       | 1036.723855      | 1320.736618 |                |
| 1069.989024                                                | 0.303824136                                       | 0.043707799      | 1           | ADAMTSL1       |
| 9                                                          | 17906563                                          | 18910950         | +           | 13652          |
| protein_coding                                             | ADAMTS like 1 [Source:HGNC Symbol;Acc:HGNC:14632] |                  |             |                |
| -                                                          | 1463 1417                                         | 1421 981         | 901 1123    |                |
| 5.181425558                                                | 4.52305812                                        | 4.858965709      | 3.99286633  |                |
| 4.056727831                                                | 3.824850764                                       |                  |             |                |
| ENSG00000159335                                            | 2861.521395                                       | 2680.73313       | 3596.94057  |                |
| 3545.356473                                                | 3903.002303                                       | 3652.99759       | 3046.398365 |                |
| 3700.452122                                                | -0.280580053                                      | 0.043726992      | 0.251521614 | PTMS           |
| 12                                                         | 6765516 6770952                                   | +                | 1475        | protein_coding |
| parathyrosin [Source:HGNC Symbol;Acc:HGNC:9629]            |                                                   |                  |             |                |
| -                                                          | 3866 3217 3220                                    | 3957 97.52055545 | 91.02449449 | 3081           |
| 122.3533501                                                | 121.1911996                                       | 134.1872373      | 124.7398013 |                |
| ENSG00000260877                                            | 77.91033041                                       | 26.10256213      | 79.08431154 |                |
| 22.04138311                                                | 0                                                 | 25.84885836      | 61.03240136 | 15.96341382    |
| 1.924621519                                                | 0.043749899                                       | 1                | AP005233.2  | 11             |
| 69371463                                                   | 69372512                                          | +                | 372         | lincRNA novel  |
| transcript                                                 | -                                                 | 81 30            | 85 20       | 0 28           |

|                                       |                                                      |             |             |                |       |
|---------------------------------------|------------------------------------------------------|-------------|-------------|----------------|-------|
|                                       | 10.52793744                                          | 3.514284464 | 10.66650206 | 2.987439366    |       |
|                                       | 0                                                    | 3.499823231 |             |                |       |
| ENSG00000148303                       | 15260.8062                                           | 17689.70635 | 19104.90886 |                |       |
| 19107.67502                           | 21620.45095                                          | 20302.43189 | 17351.80714 |                |       |
| 20343.51929                           | -0.229450317                                         | 0.043809289 | 0.251521614 | RPL7A          |       |
| 9                                     | 133348214                                            | 133351426   | +           | 2242           |       |
| protein_coding                        | ribosomal protein L7a [Source:HGNC                   |             |             |                |       |
| Symbol;Acc:HGNC:10364]                | -                                                    | 15866       | 20331       | 20534          | 17338 |
| 21992                                 | 342.1630103                                          | 395.1679644 | 427.5471199 |                | 17837 |
| 429.7099738                           | 489.0278179                                          | 456.1000677 |             |                |       |
| ENSG00000115234                       | 2235.353184                                          | 2283.104101 | 2185.51821  |                |       |
| 2314.345226                           | 2887.252014                                          | 2919.997821 | 2234.658498 |                |       |
| 2707.198354                           | -0.276814992                                         | 0.043828661 | 0.251521614 | SNX17          |       |
| 2                                     | 27370496                                             | 27377533    | +           | 3765           |       |
| protein_coding                        | sorting nexin 17 [Source:HGNC Symbol;Acc:HGNC:14979] |             |             |                |       |
| -                                     | 2324                                                 | 2624        | 2349        | 2100           | 2382  |
| 29.84505336                           | 30.37088504                                          | 29.12487513 | 30.99319565 |                |       |
| 38.8887637                            | 39.06296725                                          |             |             |                |       |
| ENSG00000167770                       | 3351.106063                                          | 2872.151919 | 3063.819269 |                |       |
| 3157.42813                            | 4032.698342                                          | 4077.657406 | 3095.692417 |                |       |
| 3755.927959                           | -0.279053007                                         | 0.04383819  | 0.251521614 | OTUB1          |       |
| 11                                    | 63985853                                             | 64001811    | +           | 5336           |       |
| protein_coding                        | "OTU deubiquitinase, ubiquitin aldehyde binding 1    |             |             |                |       |
| [Source:HGNC Symbol;Acc:HGNC:23077]"  | -                                                    |             | 3484        | 3301           | 3293  |
| 2865                                  | 3327                                                 | 4417        | 31.56919749 | 26.95803924    |       |
| 28.80858621                           | 29.83464325                                          | 38.32519208 | 38.48952899 |                |       |
| ENSG00000080603                       | 387.6279402                                          | 356.7350157 | 326.5716865 |                |       |
| 250.1696983                           | 161.2109647                                          | 296.3386976 | 356.9782141 |                |       |
| 235.9064535                           | 0.594989114                                          | 0.04385818  | 1           | SRCAP          | 16    |
| 30698209                              | 30741409                                             | +           | 13674       | protein_coding |       |
| Snf2 related CREBBP activator protein | [Source:HGNC                                         |             |             |                |       |
| Symbol;Acc:HGNC:16974]                | -                                                    | 403         | 410         | 351            | 227   |
| 321                                   | 1.424986294                                          | 1.306612711 | 1.198277975 |                | 133   |
| 0.922448917                           | 0.597865407                                          | 1.09154206  |             |                |       |
| ENSG00000149346                       | 329.9165843                                          | 323.6717704 | 240.9745493 |                |       |
| 214.9034853                           | 192.7258901                                          | 191.0969171 | 298.1876347 |                |       |
| 199.5754308                           | 0.579493339                                          | 0.043877181 | 1           | SLX4IP         | 20    |
| 10435303                              | 10636829                                             | +           | 6492        | protein_coding |       |
| SLX4 interacting protein              | [Source:HGNC Symbol;Acc:HGNC:16225]                  |             |             |                |       |
| -                                     | 343                                                  | 372         | 259         | 195            | 159   |
| 2.554564222                           | 2.497025782                                          | 1.862375667 | 1.669045376 |                |       |
| 1.505448743                           | 1.482596097                                          |             |             |                |       |
| ENSG00000284770                       | 232.7691353                                          | 173.1469954 | 194.454366  |                |       |
| 112.4110539                           | 130.9081518                                          | 129.2442918 | 200.1234989 |                |       |
| 124.1878325                           | 0.687909198                                          | 0.043877676 | 1           | TBCE           | 1     |
| 235367360                             | 235452443                                            | +           | 12444       | protein_coding |       |
| tubulin folding cofactor E            | [Source:HGNC Symbol;Acc:HGNC:11582]                  |             |             |                |       |
| -                                     | 242                                                  | 199         | 209         | 102            | 108   |
| 0.940278661                           | 0.696869844                                          | 0.784029348 | 0.455462067 |                |       |
| 0.533471365                           | 0.523117262                                          |             |             |                |       |

|                                                                |                |                                      |                                     |                |             |
|----------------------------------------------------------------|----------------|--------------------------------------|-------------------------------------|----------------|-------------|
| ENSG00000115350                                                | 453.9959994    | 328.8922828                          | 416.820842                          |                |             |
| 435.3173164                                                    | 593.935133     | 656.3763676                          | 399.9030414                         |                |             |
| 561.8762723                                                    | -0.491502129   | 0.043903237                          | 1                                   | POLE4          | 2           |
| 74958492                                                       | 74970128       | +                                    | 2151                                | protein_coding |             |
| "DNA polymerase epsilon 4, accessory subunit [Source:HGNC      |                |                                      |                                     |                |             |
| Symbol;Acc:HGNC:18755]"                                        | -              | 472                                  | 378                                 | 448            | 395 490     |
| 711                                                            | 10.60969269    | 7.657905225                          | 9.722627329                         |                |             |
| 10.20395956                                                    | 14.00241773    | 15.3695166                           |                                     |                |             |
| ENSG00000163661                                                | 1639.002506    | 1924.628914                          | 1331.407645                         |                |             |
| 709.7325361                                                    | 1472.716707    | 1349.679676                          | 1631.679688                         |                |             |
| 1177.376306                                                    | 0.470875339    | 0.044071958                          | 1                                   | PTX3           | 3           |
| 157436789                                                      | 157443628      | +                                    | 1940                                | protein_coding |             |
| pentraxin 3 [Source:HGNC Symbol;Acc:HGNC:9692] - 1704          |                |                                      |                                     |                |             |
| 2212                                                           | 1431           | 644                                  | 1215                                | 1462           | 42.46871075 |
| 49.68691016                                                    | 34.43371968    | 18.44574417                          | 38.49655866                         |                |             |
| 35.04101366                                                    |                |                                      |                                     |                |             |
| ENSG00000058673                                                | 16.35155083    | 0                                    | 10.23444032                         | 0              | 0           |
| 0                                                              | 8.861997048    | 0                                    | 5.488401137                         | 0.044090371    |             |
| 1                                                              | ZC3H11A 1      | 203795654                            | 203854999                           | +              |             |
| 12798                                                          | protein_coding | zinc finger CCCH-type containing 11A |                                     |                |             |
| [Source:HGNC Symbol;Acc:HGNC:29093] - 17 0 11                  |                |                                      |                                     |                |             |
| 0                                                              | 0              | 0                                    | 0.06422558                          | 0              | 0.040123297 |
| 0                                                              | 0              | 0                                    |                                     |                |             |
| ENSG00000278931                                                | 17.31340676    | 0                                    | 9.304036652                         | 0              | 0           |
| 0                                                              | 8.872481136    | 0                                    | 5.490068199                         | 0.044122592    |             |
| 1                                                              | CR381670.1     | 21                                   | 8857260                             | 8880976        | + 1693      |
| unprocessed_pseudogene "ankyrin repeat domain 20 family,       |                |                                      |                                     |                |             |
| member A3 (ANKRD20A3) pseudogene"                              | -              | 18                                   | 0                                   | 10             |             |
| 0                                                              | 0              | 0                                    | 0.514063494                         | 0              | 0.275733211 |
| 0                                                              | 0              | 0                                    |                                     |                |             |
| ENSG00000006062                                                | 661.7568805    | 403.7196276                          | 490.3227316                         |                |             |
| 393.4386885                                                    | 336.9672795    | 367.4230581                          | 518.5997465                         |                |             |
| 365.9430087                                                    | 0.502270228    | 0.044189822                          | 1                                   | MAP3K14        | 17          |
| 45263119                                                       | 45317145       | -                                    | 5784                                | protein_coding |             |
| mitogen-activated protein kinase kinase kinase 14 [Source:HGNC |                |                                      |                                     |                |             |
| Symbol;Acc:HGNC:6853]                                          | -              | 688                                  | 464                                 | 527            | 357 278     |
| 398                                                            | 5.751238402    | 3.495813813                          | 4.253323022                         |                |             |
| 3.429667164                                                    | 2.95436311     | 3.199527195                          |                                     |                |             |
| ENSG00000260923                                                | 0              | 0                                    | 9.918622399                         | 1.212112516    |             |
| 10.15490864                                                    | 0              | 7.095214518                          | -5.3924831                          |                |             |
| 0.044199214                                                    | 1              | LINC02193                            | 16                                  | 90173217       |             |
| 90222678                                                       | +              | 3723                                 | lincRNA long intergenic non-protein |                |             |
| coding RNA 2193 [Source:HGNC Symbol;Acc:HGNC:53055] - 0        |                |                                      |                                     |                |             |
| 0                                                              | 0              | 9                                    | 1                                   | 11             | 0 0         |
| 0.134326444                                                    | 0.016510276    | 0.137382263                          |                                     |                |             |
| ENSG00000241288                                                | 105.8041524    | 92.22905285                          | 59.54583457                         |                |             |
| 20.93931395                                                    | 47.27238814    | 46.15867564                          | 85.85967994                         |                |             |
| 38.12345924                                                    | 1.170622688    | 0.044200087                          | 1                                   | AC092902.2     |             |
| 3                                                              | 125827238      | 125916384                            | -                                   | 6732           |             |
| processed_transcript uncharacterized LOC101927056 [Source:NCBI |                |                                      |                                     |                |             |

|                                                         |                                              |                                    |                                   |                |             |       |
|---------------------------------------------------------|----------------------------------------------|------------------------------------|-----------------------------------|----------------|-------------|-------|
| gene;Acc:101927056]                                     | -                                            | 110                                | 106                               | 64             | 19          | 39    |
| 50                                                      | 0.790041299                                  | 0.686152035                        | 0.443794487                       |                |             |       |
| 0.156827254                                             | 0.356096627                                  | 0.345347976                        |                                   |                |             |       |
| ENSG00000182450                                         | 18.27526269                                  | 0                                  | 8.373632987                       | 0              | 0           |       |
| 0                                                       | 8.882965225                                  | 0                                  | 5.491734267                       | 0.044213307    |             |       |
| 1                                                       | KCNK4                                        | 11                                 | 64291302                          | 64300031       |             | +     |
| 2632                                                    | protein_coding                               |                                    | potassium two pore domain channel |                |             |       |
| subfamily K member 4 [Source:HGNC Symbol;Acc:HGNC:6279] | -                                            |                                    |                                   |                |             | 19    |
| 0                                                       | 9                                            | 0                                  | 0                                 | 0              | 0.349034963 | 0     |
| 0.159625643                                             | 0                                            | 0                                  | 0                                 |                |             |       |
| ENSG00000179271                                         | 3301.089555                                  | 3084.452758                        | 3428.537506                       |                |             |       |
| 3269.839184                                             | 4117.546218                                  | 4567.862541                        | 3271.35994                        |                |             |       |
| 3985.082648                                             | -0.284945711                                 | 0.044217957                        | 0.25225284                        |                |             |       |
| GADD45GIP1                                              | 19                                           | 12953119                           | 12957236                          | -              |             | 1782  |
| protein_coding                                          | GADD45G                                      | interacting protein 1 [Source:HGNC |                                   |                |             |       |
| Symbol;Acc:HGNC:29996]                                  | -                                            | 3432                               | 3545                              | 3685           | 2967        | 3397  |
| 4948                                                    | 93.11953443                                  | 86.68962765                        | 96.53300559                       |                |             |       |
| 92.51707426                                             | 117.1750661                                  | 129.1079571                        |                                   |                |             |       |
| ENSG00000226952                                         | 5.771135586                                  | 10.44102485                        | 5.582421991                       |                |             | 0     |
| 0                                                       | 0                                            | 7.264860809                        | 0                                 | 5.203343008    |             |       |
| 0.044277616                                             | 1                                            | AC093019.1                         | 1                                 | 100099239      |             |       |
| 100099490                                               | +                                            | 252                                | processed_pseudogene              | novel          |             |       |
| pseudogene                                              | -                                            | 6                                  | 12                                | 6              | 0           | 0     |
| 1.151203036                                             | 2.075101303                                  | 1.111467442                        | 0                                 | 0              |             | 0     |
| 0                                                       |                                              |                                    |                                   |                |             |       |
| ENSG00000077549                                         | 3646.395834                                  | 4001.522774                        | 3791.394936                       |                |             |       |
| 4229.741419                                             | 4535.725036                                  | 4626.022472                        | 3813.104515                       |                |             |       |
| 4463.829642                                             | -0.227311929                                 | 0.044341601                        | 0.25225284                        |                |             | CAPZB |
| 1                                                       | 19338776                                     | 19485539                           | -                                 | 3238           |             |       |
| protein_coding                                          | capping actin protein of muscle              | Z-line subunit beta                |                                   |                |             |       |
| [Source:HGNC Symbol;Acc:HGNC:1491]                      | -                                            | 3791                               | 4599                              | 4075           |             |       |
| 3838                                                    | 3742                                         | 5011                               | 56.608045                         | 61.8935172     |             |       |
| 58.74850298                                             | 65.86279695                                  | 71.03531309                        | 71.95791589                       |                |             |       |
| ENSG00000184900                                         | 3450.177224                                  | 3607.374086                        | 3768.134844                       |                |             |       |
| 4449.05318                                              | 4227.848457                                  | 4017.651127                        | 3608.562051                       |                |             |       |
| 4231.517588                                             | -0.229623382                                 | 0.044377815                        | 0.25225284                        |                |             | SUM03 |
| 21                                                      | 44805617                                     | 44818779                           | -                                 | 2732           |             |       |
| protein_coding                                          | small ubiquitin-like modifier 3 [Source:HGNC |                                    |                                   |                |             |       |
| Symbol;Acc:HGNC:11124]                                  | -                                            | 3587                               | 4146                              | 4050           | 4037        | 3488  |
| 4352                                                    | 63.48218965                                  | 66.13132138                        | 69.20227374                       |                |             |       |
| 82.1088743                                              | 78.47713532                                  | 74.06946535                        |                                   |                |             |       |
| ENSG00000147127                                         | 59.63506772                                  | 114.8512734                        | 91.17955919                       |                |             |       |
| 22.04138311                                             | 69.09041343                                  | 11.07808215                        | 88.55530009                       |                |             |       |
| 34.06995956                                             | 1.387940724                                  | 0.044379543                        | 1                                 | RAB41          | X           |       |
| 70282093                                                | 70285002                                     | +                                  | 1344                              | protein_coding |             |       |
| "RAB41, member RAS oncogene family [Source:HGNC         |                                              |                                    |                                   |                |             |       |
| Symbol;Acc:HGNC:18293]"                                 | -                                            | 62                                 | 132                               | 98             | 20          | 57    |
| 12                                                      | 2.230455881                                  | 4.279896437                        | 3.40386904                        |                |             |       |
| 0.826880539                                             | 2.606891447                                  | 0.415157603                        |                                   |                |             |       |
| ENSG00000134330                                         | 461.6908469                                  | 513.3503885                        | 485.6707132                       |                |             |       |

|                                                         |              |             |             |                |         |      |
|---------------------------------------------------------|--------------|-------------|-------------|----------------|---------|------|
| 366.9890288                                             | 402.4213554  | 283.4142684 | 486.9039829 |                |         |      |
| 350.9415509                                             | 0.474236836  | 0.044538372 | 1           | IAH1           | 2       |      |
| 9473658                                                 | 9496543      | +           | 5908        | protein_coding | isoamyl |      |
| acetate hydrolyzing esterase 1 (putative) [Source:HGNC  |              |             |             |                |         |      |
| Symbol;Acc:HGNC:27696]                                  | -            | 480         | 590         | 522            | 333     | 332  |
| 307                                                     | 3.928275761  | 4.351811973 | 4.124545057 |                |         |      |
| 3.131956998                                             | 3.454179937  | 2.416177896 |             |                |         |      |
| ENSG00000184752                                         | 271.2433725  | 371.5264676 | 481.9490986 |                |         |      |
| 535.6056095                                             | 585.4503454  | 485.5892677 | 374.9063129 |                |         |      |
| 535.5484075                                             | -0.513750556 | 0.044543306 | 1           | NDUFA12        | 12      |      |
| 94897055                                                | 95003770     | -           | 1815        | protein_coding |         |      |
| NADH:ubiquinone oxidoreductase subunit A12 [Source:HGNC |              |             |             |                |         |      |
| Symbol;Acc:HGNC:23987]                                  | -            | 282         | 427         | 518            | 486     | 483  |
| 526                                                     | 7.512313362  | 10.25202941 | 13.32291221 |                |         |      |
| 14.87892942                                             | 16.35753513  | 13.47535245 |             |                |         |      |
| ENSG00000185787                                         | 3808.949487  | 3778.780911 | 4090.054512 |                |         |      |
| 4420.399382                                             | 4614.51235   | 4577.094276 | 3892.59497  |                |         |      |
| 4537.335336                                             | -0.221125012 | 0.044588407 | 0.252667638 |                |         |      |
| MORF4L1 15                                              | 78810487     | 78898133    | +           | 6584           |         |      |
| protein_coding mortality factor 4 like 1 [Source:HGNC   |              |             |             |                |         |      |
| Symbol;Acc:HGNC:16989]                                  | -            | 3960        | 4343        | 4396           | 4011    | 3807 |
| 4958                                                    | 29.08081544  | 28.74475457 | 31.16835612 |                |         |      |
| 33.8512635                                              | 35.54188152  | 35.01448301 |             |                |         |      |
| ENSG00000127980                                         | 510.7454993  | 403.7196276 | 391.699943  |                |         |      |
| 347.151784                                              | 279.9979913  | 300.0313916 | 435.3883566 |                |         |      |
| 309.060389                                              | 0.493987512  | 0.04477734  | 1           | PEX1           | 7       |      |
| 92487020                                                | 92528531     | -           | 7849        | protein_coding |         |      |
| peroxisomal biogenesis factor 1 [Source:HGNC            |              |             |             |                |         |      |
| Symbol;Acc:HGNC:8850]                                   | -            | 531         | 464         | 421            | 315     | 231  |
| 325                                                     | 3.27100651   | 2.576097222 | 2.50388168  |                |         |      |
| 2.230017486                                             | 1.809026843  | 1.925307267 |             |                |         |      |
| ENSG00000077152                                         | 454.9578553  | 558.5948295 | 540.5645295 |                |         |      |
| 665.6497699                                             | 726.0553973  | 653.606847  | 518.0390714 |                |         |      |
| 681.7706714                                             | -0.395576116 | 0.044806111 | 1           | UBE2T          | 1       |      |
| 202331657                                               | 202341980    | -           | 1652        | protein_coding |         |      |
| ubiquitin conjugating enzyme E2 T [Source:HGNC          |              |             |             |                |         |      |
| Symbol;Acc:HGNC:25009]                                  | -            | 473         | 642         | 581            | 604     | 599  |
| 708                                                     | 13.8437043   | 16.9349369  | 16.41769281 |                |         |      |
| 20.31603439                                             | 22.28764284  | 19.92756493 |             |                |         |      |
| ENSG00000100418                                         | 1587.062286  | 1317.309302 | 1331.407645 |                |         |      |
| 1291.62505                                              | 1865.441163  | 2476.874535 | 1411.926411 |                |         |      |
| 1877.980249                                             | -0.412093949 | 0.044873736 | 1           | DESI1          | 22      |      |
| 41598028                                                | 41621096     | -           | 4972        | protein_coding |         |      |
| desumoylating isopeptidase 1 [Source:HGNC               |              |             |             |                |         |      |
| Symbol;Acc:HGNC:24577]                                  | -            | 1650        | 1514        | 1431           | 1172    | 1539 |
| 2683                                                    | 16.04552904  | 13.26946316 | 13.43552216 |                |         |      |
| 13.09810704                                             | 19.02632277  | 25.09115024 |             |                |         |      |
| ENSG00000168135                                         | 10.58041524  | 0           | 15.81686231 | 0              | 0       |      |
| 0                                                       | 8.799092516  | 0           | 5.478371305 | 0.044925765    |         |      |
| 1                                                       | KCNJ4 22     | 38426327    | 38455199    |                |         | -    |

|                                               |                                          |                                 |             |                |             |             |
|-----------------------------------------------|------------------------------------------|---------------------------------|-------------|----------------|-------------|-------------|
| 2065                                          | protein_coding                           | potassium voltage-gated channel |             |                |             |             |
| subfamily J member 4                          | [Source:HGNC Symbol;Acc:HGNC:6265]       | -                               |             |                |             | 11          |
| 0                                             | 17                                       | 0                               | 0           | 0              | 0.257557289 | 0           |
| 0.384303997                                   | 0                                        | 0                               | 0           |                |             |             |
| ENSG00000198040                               | 1386.996252                              | 1267.714434                     | 1285.817865 |                |             |             |
| 1243.134007                                   | 796.3579232                              | 1007.182302                     | 1313.509517 |                |             |             |
| 1015.558078                                   | 0.370673728                              | 0.044927743                     | 1           | ZNF84          |             | 12          |
| 133037292                                     | 133063304                                | +                               | 9520        | protein_coding |             |             |
| zinc finger protein 84                        | [Source:HGNC Symbol;Acc:HGNC:13159]      |                                 |             |                |             |             |
| zf-C2H2                                       | 1442                                     | 1457                            | 1382        | 1128           | 657         | 1091        |
| 7.323682841                                   | 6.669314554                              | 6.776682373                     | 6.58391469  |                |             |             |
| 4.242049983                                   | 5.328669936                              |                                 |             |                |             |             |
| ENSG00000148200                               | 165.4392201                              | 97.44956528                     | 145.1429718 |                |             |             |
| 46.28690453                                   | 94.54477627                              | 73.85388102                     | 136.0105857 |                |             |             |
| 71.56185394                                   | 0.927126521                              | 0.044928542                     | 1           | NR6A1          |             | 9           |
| 124517275                                     | 124771310                                | -                               | 7124        | protein_coding |             |             |
| nuclear receptor subfamily 6 group A member 1 | [Source:HGNC                             |                                 |             |                |             |             |
| Symbol;Acc:HGNC:7985]                         | GCNF-like                                | 172                             | 112         | 156            |             | 42          |
| 78                                            | 80                                       | 1.167362539                     | 0.685098016 | 1.02222553     |             |             |
| 0.32759512                                    | 0.67300463                               | 0.522152179                     |             |                |             |             |
| ENSG00000267169                               | 104.8422965                              | 110.5008463                     | 120.9524765 |                |             |             |
| 55.10345777                                   | 20.60591278                              | 80.31609561                     | 112.0985398 |                |             |             |
| 52.00848872                                   | 1.101241649                              | 0.045058556                     | 1           | AC022098.1     |             |             |
| 19                                            | 14137179                                 | 14171267                        | +           | 3186           |             |             |
| antisense                                     | uncharacterized LOC100507373             | [Source:NCBI                    |             |                |             |             |
| gene;Acc:100507373]                           | -                                        | 109                             | 127         | 130            | 50          | 17          |
| 87                                            | 1.654176866                              | 1.73706691                      | 1.904774712 |                |             |             |
| 0.87203974                                    | 0.327982378                              | 1.269709881                     |             |                |             |             |
| ENSG00000134453                               | 1667.858184                              | 1322.529814                     | 1438.404066 |                |             |             |
| 1285.012635                                   | 1027.871414                              | 1210.280475                     | 1476.264022 |                |             |             |
| 1174.388175                                   | 0.32946755                               | 0.04507681                      | 1           | RBM17          |             | 10          |
| 6088987                                       | 6117457                                  | +                               | 6419        | protein_coding | RNA binding |             |
| motif protein 17                              | [Source:HGNC Symbol;Acc:HGNC:16944]      | -                               |             |                |             | 1734        |
| 1520                                          | 1546                                     | 1166                            | 848         | 1311           | 13.06119562 |             |
| 10.31893341                                   | 11.24315375                              | 10.09353326                     | 8.12037035  |                |             |             |
| 9.496560386                                   |                                          |                                 |             |                |             |             |
| ENSG00000232060                               | 46.16908469                              | 6.960683234                     | 19.53847697 |                |             | 0           |
| 3.636337549                                   | 7.385388102                              | 24.2227483                      | 3.67390855  |                |             |             |
| 2.703095449                                   | 0.045093695                              | 1                               | SLC4A1APP1  |                |             | 9           |
| 30558880                                      | 30559481                                 | -                               | 602         |                |             |             |
| processed_pseudogene                          | solute carrier family 4 member 1 adaptor |                                 |             |                |             |             |
| protein pseudogene 1                          | [Source:HGNC Symbol;Acc:HGNC:49811]      |                                 |             |                |             | -           |
| 48                                            | 8                                        | 21                              | 0           | 3              | 8           | 3.855191561 |
| 0.579098038                                   | 1.628429043                              | 0                               | 0.306317722 |                |             |             |
| 0.61790899                                    |                                          |                                 |             |                |             |             |
| ENSG00000186141                               | 3157.773021                              | 3048.779256                     | 2856.339252 |                |             |             |
| 3170.65296                                    | 3939.365678                              | 3730.544165                     | 3020.963843 |                |             |             |
| 3613.520934                                   | -0.258362673                             | 0.045175315                     | 0.255205778 |                |             | POLR3C      |
| 1                                             | 145824088                                | 145842505                       | +           | 2793           |             |             |
| protein_coding                                | RNA polymerase III subunit C             | [Source:HGNC                    |             |                |             |             |

|                                                            |                         |                                  |                             |                      |             |      |      |
|------------------------------------------------------------|-------------------------|----------------------------------|-----------------------------|----------------------|-------------|------|------|
| Symbol;Acc:HGNC:30076]                                     | -                       | 3283                             | 3504                        | 3070                 | 2877        | 3250 |      |
| 4041                                                       | 56.83307618             | 54.67033808                      | 51.31135408                 |                      |             |      |      |
| 57.23754129                                                | 71.52531605             | 67.27426055                      |                             |                      |             |      |      |
| ENSG00000239494                                            | 0                       | 5.220512425                      | 21.3992843                  | 0                    | 0           |      |      |
| 0                                                          | 8.873265575             | 0                                | 5.491384531                 | 0.045268705          |             |      |      |
| 1                                                          | RN7SL333P               | 1                                | 169859756                   | 169860052            |             |      |      |
| +                                                          | 297                     | misc_RNA                         | "RNA, 7SL, cytoplasmic 333, |                      |             |      |      |
| pseudogene [Source:HGNC                                    | Symbol;Acc:HGNC:46349]" | -                                | 0                           | 6                    |             |      |      |
| 23                                                         | 0                       | 0                                | 0                           | 0.880346007          |             |      |      |
| 3.615075922                                                | 0                       | 0                                | 0                           |                      |             |      |      |
| ENSG00000172482                                            | 0                       | 0                                | 0                           | 9.69690013           |             |      |      |
| 14.7707762                                                 | 0                       | 8.155892111                      | -5.592366746                | 0.045282008          |             |      |      |
| 1                                                          | AGXT                    | 2                                | 240868479                   | 240880502            | +           |      |      |
| 4459                                                       | protein_coding          | alanine--glyoxylate and serine-- |                             |                      |             |      |      |
| pyruvate aminotransferase [Source:HGNC                     | Symbol;Acc:HGNC:341]    | -                                |                             |                      |             |      |      |
| 0                                                          | 0                       | 0                                | 8                           | 16                   | 0           | 0    |      |
| 0                                                          | 0                       | 0.110280792                      | 0.166845128                 |                      |             |      |      |
| ENSG00000213549                                            | 28.85567793             | 0                                | 4.652018326                 | 0                    | 0           |      |      |
| 0.923173513                                                | 11.16923208             | 0.307724504                      | 4.860072632                 |                      |             |      |      |
| 0.045329678                                                | 1                       | AC005077.1                       | 7                           | 76113026             |             |      |      |
| 76113400                                                   | -                       | 375                              | processed_pseudogene        | "GrpE-               |             |      |      |
| like 1, mitochondrial (E. coli) (GRPEL1)                   | pseudogene"             | -                                | 30                          |                      |             |      |      |
| 0                                                          | 5                       | 0                                | 0                           | 1                    | 3.868042199 | 0    |      |
| 0.622421767                                                | 0                       | 0                                | 0.123993737                 |                      |             |      |      |
| ENSG0000008300                                             | 744.4764906             | 681.2768715                      | 678.2642719                 |                      |             |      |      |
| 459.5628378                                                | 465.4512063             | 642.5287649                      | 701.3392113                 |                      |             |      |      |
| 522.5142696                                                | 0.423058713             | 0.045336649                      | 1                           | CELSR3               | 3           |      |      |
| 48636469                                                   | 48662915                | -                                | 13873                       | protein_coding       |             |      |      |
| cadherin EGF LAG seven-pass G-type receptor 3 [Source:HGNC | Symbol;Acc:HGNC:3230]   | -                                | 774                         | 783                  | 729         | 417  | 384  |
| 696                                                        | 2.69756421              | 2.45951782                       | 2.453031798                 |                      |             |      |      |
| 1.670235508                                                | 1.701406933             | 2.332758988                      |                             |                      |             |      |      |
| ENSG00000144560                                            | 1698.637574             | 1973.353697                      | 1758.462927                 |                      |             |      |      |
| 1607.918898                                                | 1378.171931             | 1456.767803                      | 1810.151399                 |                      |             |      |      |
| 1480.952877                                                | 0.289616152             | 0.045339696                      | 1                           | VGLL4                | 3           |      |      |
| 11556070                                                   | 11771350                | -                                | 7236                        | protein_coding       |             |      |      |
| vestigial like family member 4 [Source:HGNC                | Symbol;Acc:HGNC:28966]  | -                                | 1766                        | 2268                 | 1890        | 1459 | 1137 |
| 1578                                                       | 11.8003084              | 13.6585026                       | 12.19296373                 |                      |             |      |      |
| 11.20388848                                                | 9.658490716             | 10.14003511                      |                             |                      |             |      |      |
| ENSG00000233509                                            | 2.885567793             | 15.66153728                      | 3.721614661                 | 0                    |             |      |      |
| 0                                                          | 0                       | 7.422906577                      | 0                           | 5.235228073          |             |      |      |
| 0.045369985                                                | 1                       | ZNF197-AS1                       | 3                           | 44617128             |             |      |      |
| 44624797                                                   | -                       | 623                              | antisense                   | ZNF197 antisense RNA | 1           |      |      |
| [Source:HGNC                                               | Symbol;Acc:HGNC:40620]  | -                                | 3                           | 18                   | 4           |      |      |
| 0                                                          | 0                       | 0                                | 0.23282758                  | 1.259050229          |             |      |      |
| 0.299721557                                                | 0                       | 0                                | 0                           |                      |             |      |      |
| ENSG00000256742                                            | 0                       | 0                                | 0                           | 6.612414933          | 18.18168774 |      |      |
| 0                                                          | 0                       | 8.264700892                      | -5.606070239                | 0.04537536           |             |      |      |
| 1                                                          | AC145422.1              | 12                               | 121580792                   | 121593504            |             |      |      |





|                                                    |                                     |             |             |                |                |             |    |
|----------------------------------------------------|-------------------------------------|-------------|-------------|----------------|----------------|-------------|----|
| 1510427                                            | 1612110                             | -           | 8168        | protein_coding | intraflagellar |             |    |
| transport 140                                      | [Source:HGNC Symbol;Acc:HGNC:29077] |             |             | -              | 394            |             |    |
| 445                                                | 449                                 | 279         | 150         | 338            | 2.332285484    |             |    |
| 2.374121165                                        | 2.566118146                         |             | 1.898018835 |                | 1.128815308    |             |    |
| 1.924119271                                        |                                     |             |             |                |                |             |    |
| ENSG00000133195                                    | 684.8414228                         |             | 816.1401092 |                | 585.2239054    |             |    |
| 465.0731836                                        | 419.3909306                         |             | 630.5275092 |                | 695.4018125    |             |    |
| 504.9972078                                        | 0.460214594                         |             | 0.045711199 |                | 1              | SLC39A11    |    |
| 17                                                 | 72645949                            |             | 73092712    |                | -              | 5583        |    |
| protein_coding                                     | solute carrier family 39 member 11  |             |             | [Source:HGNC   |                |             |    |
| Symbol;Acc:HGNC:14463]                             | -                                   | 712         | 938         | 629            | 422            | 346         |    |
| 683                                                | 6.166142858                         |             | 7.321394494 |                | 5.25931343     |             |    |
| 4.200073271                                        | 3.809393454                         |             | 5.68832097  |                |                |             |    |
| ENSG00000185245                                    | 89.45260158                         |             | 58.29572208 |                | 67.91946756    |             |    |
| 34.16414382                                        | 9.69690013                          |             | 40.61963456 |                | 71.88926374    |             |    |
| 28.16022617                                        | 1.344151183                         |             | 0.04578938  |                | 1              | GP1BA       | 17 |
| 4932297                                            | 4935030                             | +           | 2501        | protein_coding | glycoprotein   |             |    |
| Ib platelet subunit alpha                          | [Source:HGNC Symbol;Acc:HGNC:4439]  |             |             | -              |                |             |    |
| 93                                                 | 67                                  | 73          | 31          | 8              | 44             | 1.797920455 |    |
| 1.167400053                                        | 1.362558647                         |             | 0.688747516 |                | 0.196618173    |             |    |
| 0.818031454                                        |                                     |             |             |                |                |             |    |
| ENSG00000144199                                    | 4.809279655                         |             | 9.570939447 |                | 12.09524765    |             | 0  |
| 1.212112516                                        | 0                                   |             | 8.825155583 |                | 0.404037505    |             |    |
| 4.522071376                                        | 0.045792708                         |             | 1           | FAHD2B         | 2              | 97083583    |    |
| 97094882                                           | -                                   |             | 2662        | protein_coding |                |             |    |
| fumarylacetoacetate hydrolase domain containing 2B | [Source:HGNC                        |             |             |                |                |             |    |
| Symbol;Acc:HGNC:25318]                             | -                                   | 5           | 11          | 13             | 0              | 1           |    |
| 0                                                  | 0.090816167                         |             | 0.180070774 |                | 0.22797191     | 0           |    |
| 0.023090818                                        | 0                                   |             |             |                |                |             |    |
| ENSG00000283296                                    | 0                                   | 13.05128106 | 13.02565131 |                | 0              | 0           |    |
| 0                                                  | 8.692310792                         | 0           | 5.462347507 |                | 0.04582538     |             |    |
| 1                                                  | MIR4256                             | 1           | 112461770   |                | 112461833      | -           |    |
| 64                                                 | miRNA                               | microRNA    | 4256        | [Source:HGNC   |                |             |    |
| Symbol;Acc:HGNC:38388]                             | -                                   | 0           | 15          | 14             | 0              | 0           |    |
| 0                                                  | 0                                   | 10.21338922 | 10.21160712 |                | 0              | 0           |    |
| 0                                                  |                                     |             |             |                |                |             |    |
| ENSG00000104237                                    | 57.71135586                         |             | 75.69743017 |                | 88.38834819    |             |    |
| 38.57242044                                        | 30.30281291                         |             | 31.38789943 |                | 73.93237807    |             |    |
| 33.42104426                                        | 1.145743515                         |             | 0.045845053 |                | 1              | RP1         | 8  |
| 54509422                                           | 54871720                            |             | +           | 15273          | protein_coding |             |    |
| "RP1, axonemal microtubule associated              | [Source:HGNC                        |             |             |                |                |             |    |
| Symbol;Acc:HGNC:10263]"                            | -                                   | 60          | 87          | 95             | 35             | 25          |    |
| 34                                                 | 0.189945109                         |             | 0.248229561 |                | 0.290365684    |             |    |
| 0.127337329                                        | 0.100615066                         |             | 0.103510781 |                |                |             |    |
| ENSG00000116670                                    | 902.2208632                         |             | 991.0272754 |                | 904.3523626    |             |    |
| 1081.129841                                        | 1259.384904                         |             | 1151.19737  |                | 932.5335004    |             |    |
| 1163.904039                                        | -0.31936512                         |             | 0.045866033 |                | 1              | MAD2L2      | 1  |
| 11674480                                           | 11691650                            |             | -           | 3324           | protein_coding |             |    |
| mitotic arrest deficient 2 like 2                  | [Source:HGNC                        |             |             |                |                |             |    |
| Symbol;Acc:HGNC:6764]                              | -                                   | 938         | 1139        | 972            | 981            | 1039        |    |

|                                                                 |                |                                     |              |                |                |             |
|-----------------------------------------------------------------|----------------|-------------------------------------|--------------|----------------|----------------|-------------|
| 1247                                                            | 13.64404175    | 14.93211434                         | 13.65058569  |                |                |             |
| 16.39910082                                                     | 19.21329684    | 17.44361354                         |              |                |                |             |
| ENSG00000065328                                                 | 911.8394225    | 736.092252                          | 802.0079594  |                |                |             |
| 1234.317454                                                     | 1049.689439    | 889.9392663                         | 816.6465446  |                |                |             |
| 1057.982053                                                     | -0.373254882   | 0.045871997                         | 1            | MCM10          | 10             |             |
| 13161554                                                        | 13211104       | +                                   | 5454         | protein_coding |                |             |
| minichromosome maintenance 10 replication initiation factor     |                |                                     |              |                |                |             |
| [Source:HGNC Symbol;Acc:HGNC:18043]                             |                |                                     |              |                |                |             |
| 1120                                                            | 866            | 964                                 | 8.404162094  | 6.759488401    | 862            |             |
| 7.377991797                                                     | 11.4107695     | 9.760006763                         | 8.218506792  |                |                |             |
| ENSG0000008853                                                  | 524.2114824    | 421.9914211                         | 596.3887494  |                |                |             |
| 867.3284253                                                     | 558.78387      | 696.9960021                         | 514.1972176  |                |                |             |
| 707.7027658                                                     | -0.461458607   | 0.045890272                         | 1            | RHOBTB2        | 8              |             |
| 22987417                                                        | 23020199       | +                                   | 6580         | protein_coding |                |             |
| Rho related BTB domain containing 2 [Source:HGNC                |                |                                     |              |                |                |             |
| Symbol;Acc:HGNC:18756]                                          |                |                                     |              |                |                |             |
| 755                                                             | 4.004716943    | 3.21199191                          | 4.547557214  | 641            | 787            | 461         |
| 6.646008347                                                     | 4.306479577    | 5.335216851                         |              |                |                |             |
| ENSG00000108528                                                 | 1549.549905    | 1360.813572                         | 1524.931607  |                |                |             |
| 1574.856823                                                     | 1945.440589    | 1942.357071                         | 1478.431695  |                |                |             |
| 1820.884828                                                     | -0.300770372   | 0.045912954                         | 1            | SLC25A11       |                |             |
| 17                                                              | 4937130        | 4940251                             | -            | 2669           | protein_coding | solute      |
| carrier family 25 member 11 [Source:HGNC Symbol;Acc:HGNC:10981] |                |                                     |              |                |                |             |
| 1611                                                            | 1564           | 1639                                | 1429         | 1605           | 2104           | 29.18422622 |
| 25.53564151                                                     | 28.66661512    | 29.75059793                         | 36.96356266  |                |                |             |
| 36.65457428                                                     |                |                                     |              |                |                |             |
| ENSG0000030304                                                  | 9.618559309    | 16.53162268                         | 0            | 0              | 0              |             |
| 0                                                               | 8.71672733     | 0                                   | 5.466256156  | 0.045945378    |                |             |
| 1                                                               | MUSK           | 9                                   | 110668771    | 110801620      | +              |             |
| 4246                                                            | protein_coding | muscle associated receptor tyrosine |              |                |                |             |
| kinase [Source:HGNC Symbol;Acc:HGNC:7525]                       |                |                                     |              |                |                |             |
| 0                                                               | 0              | 0                                   | 0            | 0.113873122    | 0.194998921    |             |
| 0                                                               | 0              | 0                                   | 0            |                |                |             |
| ENSG00000230555                                                 | 45.20722875    | 44.37435562                         | 29.77291729  |                |                |             |
| 18.73517564                                                     | 10.90901265    | 8.308561615                         | 39.78483389  |                |                |             |
| 12.65091663                                                     | 1.656502241    | 0.045958416                         | 1            | AL450326.1     |                |             |
| 10                                                              | 43420738       | 43422100                            | +            | 760            |                |             |
| lincRNA novel transcript                                        |                |                                     |              |                |                |             |
| 9                                                               | 9              | 2.990098411                         | 2.924254599  | 1.965542423    |                |             |
| 1.24293201                                                      | 0.727907639    | 0.550630084                         |              |                |                |             |
| ENSG00000185404                                                 | 633.8630585    | 523.7914134                         | 592.6671347  |                |                |             |
| 374.7035128                                                     | 500.6024692    | 418.1976013                         | 583.4405355  |                |                |             |
| 431.1678611                                                     | 0.436853175    | 0.045958475                         | 1            | SP140L         | 2              |             |
| 230327184                                                       | 230403732      | +                                   | 5650         | protein_coding |                |             |
| SP140 nuclear body protein like [Source:HGNC                    |                |                                     |              |                |                |             |
| Symbol;Acc:HGNC:25105]                                          |                |                                     |              |                |                |             |
| 453                                                             | 5.639468605    | 4.643085074                         | 5.263044237  | 637            | 340            | 413         |
| 3.343817088                                                     | 4.493129791    | 3.728041793                         |              |                |                |             |
| ENSG00000199133                                                 | 0              | 0                                   | 0            | 7.714484088    | 0              |             |
| 16.61712323                                                     | 0              | 8.110535772                         | -5.586485648 | 0.045972529    |                |             |

|                                             |                        |             |                              |                |                |             |
|---------------------------------------------|------------------------|-------------|------------------------------|----------------|----------------|-------------|
| 1                                           | MIRLET7D               | 9           | 94178834                     | 94178920       |                |             |
| +                                           | 87                     | miRNA       | microRNA let-7d [Source:HGNC |                |                |             |
| Symbol;Acc:HGNC:31481]                      | -                      | 0           | 0                            | 0              | 7              | 0           |
| 18                                          | 0                      | 0           | 0                            | 4.470857534    | 0              |             |
| 9.620203759                                 |                        |             |                              |                |                |             |
| ENSG00000230433                             | 23.08454234            | 0           | 3.721614661                  | 0              | 0              |             |
| 0                                           | 8.935385668            | 0           | 5.500059736                  | 0.046099459    |                |             |
| 1                                           | AL031770.1             | 6           | 524171                       | 525581         | +              | 851         |
| antisense                                   | novel transcript       | -           | 24                           | 0              |                |             |
| 4                                           | 0                      | 0           | 0                            | 1.363587144    | 0              |             |
| 0.21942013                                  | 0                      | 0           | 0                            |                |                |             |
| ENSG00000137145                             | 1169.616812            | 1206.808456 | 950.8725458                  |                |                |             |
| 1012.801554                                 | 784.236798             | 779.1584447 | 1109.099271                  |                |                |             |
| 858.7322655                                 | 0.369333687            | 0.046124448 | 1                            | DENND4C        | 9              |             |
| 19230435                                    | 19373545               | +           | 8745                         | protein_coding |                |             |
| DENN domain containing 4C [Source:HGNC      | Symbol;Acc:HGNC:26079] |             |                              |                |                |             |
| -                                           | 1216                   | 1387        | 1022                         | 919            | 647            | 844         |
| 6.723183697                                 | 6.911546671            | 5.455532129 | 5.839393488                  |                |                |             |
| 4.547700203                                 | 4.487594953            |             |                              |                |                |             |
| ENSG00000163156                             | 1761.15821             | 1673.174232 | 1618.902377                  |                |                |             |
| 1741.269266                                 | 2169.681404            | 2301.471567 | 1684.411606                  |                |                |             |
| 2070.807412                                 | -0.298194256           | 0.046154208 | 1                            | SCNM1          | 1              |             |
| 151156664                                   | 151170297              | +           | 3265                         | protein_coding |                |             |
| sodium channel modifier 1 [Source:HGNC      | Symbol;Acc:HGNC:23136] |             |                              |                |                |             |
| -                                           | 1831                   | 1923        | 1740                         | 1580           | 1790           | 2493        |
| 27.11479811                                 | 25.66579354            | 24.87780724 | 26.88969926                  |                |                |             |
| 33.6990149                                  | 35.50341353            |             |                              |                |                |             |
| ENSG00000184434                             | 17.31340676            | 13.05128106 | 3.721614661                  | 0              |                |             |
| 0                                           | 1.846347025            | 11.36210083 | 0.615449008                  |                |                |             |
| 4.117650415                                 | 0.046168101            | 1           | LRRRC19                      | 9              | 26993136       |             |
| 27005693                                    | -                      | 3609        | protein_coding               | leucine rich   |                |             |
| repeat containing 19 [Source:HGNC           | Symbol;Acc:HGNC:23379] |             |                              |                |                |             |
| 18                                          | 15                     | 4           | 0                            | 0              | 2              | 0.241149763 |
| 0.181118568                                 | 0.051739133            | 0           | 0                            | 0              | 0.02576761     |             |
| ENSG00000259863                             | 56.74949993            | 11.31111026 | 46.52018326                  |                |                |             |
| 17.63310649                                 | 6.060562582            | 6.462214589 | 38.19359781                  |                |                |             |
| 10.05196122                                 | 1.926193387            | 0.046205324 | 1                            | SH3RF3-AS1     |                |             |
| 2                                           | 109127327              | 109128930   | -                            | 1604           |                |             |
| lincRNA SH3RF3 antisense RNA 1 [Source:HGNC | Symbol;Acc:HGNC:44168] |             |                              |                |                |             |
| -                                           | 59                     | 13          | 50                           | 16             | 5              | 7           |
| 1.778479503                                 | 0.353181207            | 1.45516311  | 0.554278027                  |                |                |             |
| 0.191607719                                 | 0.202919925            |             |                              |                |                |             |
| ENSG00000057608                             | 5464.303544            | 5714.720935 | 5574.978762                  |                |                |             |
| 6498.90181                                  | 6642.376589            | 6195.417444 | 5584.667747                  |                |                |             |
| 6445.565281                                 | -0.206713229           | 0.046338437 | 0.259520159                  | GDI2           |                |             |
| 10                                          | 5765223                | 5842132     | -                            | 4033           | protein_coding | GDP         |
| dissociation inhibitor 2 [Source:HGNC       | Symbol;Acc:HGNC:4227]  |             |                              |                |                |             |
| 5681                                        | 6568                   | 5992        | 5897                         | 5480           | 6711           | 68.10794612 |
| 70.96815583                                 | 69.35689122            | 81.24842472 | 83.52177141                  |                |                |             |
| 77.37310667                                 |                        |             |                              |                |                |             |

|                                                          |              |             |             |                         |             |       |
|----------------------------------------------------------|--------------|-------------|-------------|-------------------------|-------------|-------|
| ENSG00000144713                                          | 18773.50406  | 20998.64115 | 24174.67843 |                         |             |       |
| 21932.27826                                              | 26084.66135  | 28235.26189 | 21315.60788 |                         |             |       |
| 25417.4005                                               | -0.253928301 | 0.046363079 | 0.259520159 | RPL32                   |             |       |
| 3                                                        | 12834485     | 12841588    | -           | 3720                    |             |       |
| protein_coding ribosomal protein L32 [Source:HGNC        |              |             |             |                         |             |       |
| Symbol;Acc:HGNC:10336]                                   | -            | 19518       | 24134       | 25983                   | 19901       | 21520 |
| 30585                                                    | 253.6842999  | 282.7124708 | 326.0561448 |                         |             |       |
| 297.2651541                                              | 355.587665   | 382.2931912 |             |                         |             |       |
| ENSG00000178502                                          | 443.4155842  | 359.345272  | 279.1210996 |                         |             |       |
| 179.6372723                                              | 216.9681404  | 310.1863003 | 360.6273186 |                         |             |       |
| 235.5972377                                              | 0.612100234  | 0.04641409  | 1           | KLHL11                  | 17          |       |
| 41853545                                                 | 41865431     | -           | 2383        | protein_coding          |             |       |
| kelch like family member 11 [Source:HGNC                 |              |             |             |                         |             |       |
| Symbol;Acc:HGNC:19008]                                   | -            | 461         | 413         | 300                     | 163         | 179   |
| 336                                                      | 9.35358505   | 7.552393452 | 5.876831627 |                         |             |       |
| 3.800805149                                              | 4.617175142  | 6.556110325 |             |                         |             |       |
| ENSG00000183340                                          | 616.5496517  | 929.2512117 | 566.6158321 |                         |             |       |
| 546.6263011                                              | 478.7844439  | 508.6686055 | 704.1388985 |                         |             |       |
| 511.3597835                                              | 0.461790072  | 0.046432262 | 1           | JRKL                    | 11          |       |
| 96389989                                                 | 96507574     | +           | 3511        | protein_coding          |             |       |
| JRK like [Source:HGNC Symbol;Acc:HGNC:6200]              |              |             |             |                         |             |       |
| 1068                                                     | 609          | 496         | 395         | 551                     | 8.827310773 |       |
| 13.25558873                                              | 8.09715586   | 7.849877702 | 6.915341415 |                         |             |       |
| 7.297125029                                              |              |             |             |                         |             |       |
| ENSG00000023909                                          | 811.8064057  | 1062.374279 | 982.5062704 |                         |             |       |
| 895.9822234                                              | 1344.232781  | 1590.627962 | 952.2289849 |                         |             |       |
| 1276.947655                                              | -0.423582572 | 0.046481448 | 1           | GCLM                    | 1           |       |
| 93885205                                                 | 93909456     | -           | 5420        | protein_coding          |             |       |
| glutamate-cysteine ligase modifier subunit [Source:HGNC  |              |             |             |                         |             |       |
| Symbol;Acc:HGNC:4312]                                    | -            | 844         | 1221        | 1056                    | 813         | 1109  |
| 1723                                                     | 7.529122731  | 9.816913745 | 9.095166786 |                         |             |       |
| 8.33495583                                               | 12.5770741   | 14.78144899 |             |                         |             |       |
| ENSG00000160813                                          | 319.3361691  | 446.3538124 | 374.0222734 |                         |             |       |
| 296.4566028                                              | 206.0591278  | 277.8752273 | 379.904085  |                         |             |       |
| 260.1303193                                              | 0.545597372  | 0.046546151 | 1           | PPP1R35                 | 7           |       |
| 100435282                                                | 100436565    | -           | 1187        | protein_coding          |             |       |
| protein phosphatase 1 regulatory subunit 35 [Source:HGNC |              |             |             |                         |             |       |
| Symbol;Acc:HGNC:28320]                                   | -            | 332         | 513         | 402                     | 269         | 170   |
| 301                                                      | 13.52348368  | 18.83324881 | 15.80961777 |                         |             |       |
| 12.5925477                                               | 8.803301228  | 11.79089562 |             |                         |             |       |
| ENSG00000277067                                          | 32.70310165  | 0.870085404 | 8.373632987 |                         |             |       |
| 2.204138311                                              | 0            | 0.923173513 | 13.98227335 | 1.042437275             |             |       |
| 3.731309192                                              | 0.046596667  | 1           | CU634019.1  | 21                      |             |       |
| 7048891                                                  | 7087229      | +           | 3058        | lincRNA uncharacterized |             |       |
| LOC102724843 [Source:NCBI gene;Acc:102724843]            |              |             |             |                         |             |       |
| 9                                                        | 2            | 0           | 1           | 0.537579442             | 0.014250205 |       |
| 0.137388716                                              | 0.036341643  | 0           | 0.015205249 |                         |             |       |
| ENSG00000130714                                          | 148.1258134  | 180.1076787 | 195.3847697 |                         |             |       |
| 275.5172889                                              | 220.604478   | 301.8777387 | 174.5394206 |                         |             |       |
| 265.9998352                                              | -0.608762395 | 0.046601347 | 1           | POMT1                   | 9           |       |

|                                                              |              |                          |             |                     |
|--------------------------------------------------------------|--------------|--------------------------|-------------|---------------------|
| 131502902                                                    | 131523806    | +                        | 6067        | protein_coding      |
| protein 0-mannosyltransferase 1 [Source:HGNC                 |              |                          |             |                     |
| Symbol;Acc:HGNC:9202]                                        | -            | 154                      | 207         | 210 250 182         |
| 327                                                          | 1.22729211   | 1.486808202              | 1.615813884 |                     |
| 2.289697223                                                  | 1.843931372  | 2.506136812              |             |                     |
| ENSG00000271967                                              | 0            | 21.75213511              | 4.652018326 | 0 0                 |
| 0                                                            | 8.801384477  | 0                        | 5.481020114 | 0.046657363         |
| 1                                                            | AL583856.2   | 6                        | 70596438    | 70596980            |
| +                                                            | 543          | lincRNA novel transcript | -           | 0                   |
| 25                                                           | 5            | 0                        | 0           | 0                   |
| 0.429849287                                                  | 0            | 0                        | 0           | 2.006313414         |
| ENSG00000206739                                              | 18.27526269  | 7.830768638              | 0           | 0 0                 |
| 0                                                            | 8.702010442  | 0                        | 5.462688545 | 0.046660974         |
| 1                                                            | RF00019      | 22                       | 19045256    | 19045367            |
| 112                                                          | misc_RNA     | -                        | 19          | 9 0                 |
| 0                                                            | 0            | 0                        | 8.202321628 | 3.501733448         |
| 0                                                            | 0            | 0                        |             | 0                   |
| ENSG00000269343                                              | 626.168211   | 503.7794491              | 578.7110797 |                     |
| 477.1959443                                                  | 270.3010911  | 451.4318477              | 569.5529133 |                     |
| 399.6429611                                                  | 0.509460897  | 0.04666275               | 1           | ZNF587B 19          |
| 57819741                                                     | 57846238     | +                        | 4380        | protein_coding      |
| zinc finger protein 587B [Source:HGNC Symbol;Acc:HGNC:37142] |              |                          |             |                     |
| zf-C2H2                                                      | 651          | 579                      | 622         | 433 223 489         |
| 7.186345525                                                  | 5.760538068  | 6.629218139              | 5.493205288 |                     |
| 3.129522748                                                  | 5.191176161  |                          |             |                     |
| ENSG00000136932                                              | 200.0660336  | 198.3794722              | 227.0184943 |                     |
| 301.9669486                                                  | 356.3610798  | 263.1044511              | 208.488     | 307.1441598         |
| -0.557811726                                                 | 0.046720827  | 1                        | TRM0        | 9                   |
| 97904489                                                     | 97922570     | -                        | 4203        | protein_coding tRNA |
| methyltransferase 0 [Source:HGNC Symbol;Acc:HGNC:30967]      |              |                          |             |                     |
| 228                                                          | 244          | 274                      | 294         | 285 2.392793176     |
| 2.363926966                                                  | 2.710044812  | 3.622456813              | 4.299671741 |                     |
| 3.152945676                                                  |              |                          |             |                     |
| ENSG00000164897                                              | 885.8693124  | 1044.97257               | 930.4036652 |                     |
| 1010.597416                                                  | 1271.50603   | 1361.680931              | 953.748516  |                     |
| 1214.594792                                                  | -0.348910103 | 0.046748799              | 1           | TMUB1 7             |
| 151081080                                                    | 151083546    | -                        | 2005        | protein_coding      |
| transmembrane and ubiquitin like domain containing 1         |              |                          |             |                     |
| [Source:HGNC Symbol;Acc:HGNC:21709]                          |              |                          |             |                     |
| 917                                                          | 1049         | 1475                     | 22.20989318 | 26.10280796         |
| 23.28260975                                                  | 25.41364754  | 32.15943954              | 34.20650173 |                     |
| ENSG00000149716                                              | 582.8846942  | 346.2939909              | 495.9051535 |                     |
| 283.2317729                                                  | 231.5134906  | 430.1988569              | 475.0279462 |                     |
| 314.9813735                                                  | 0.590119002  | 0.046833959              | 1           | LT01 11             |
| 69653076                                                     | 69675416     | -                        | 7872        | protein_coding      |
| "LT01, ABCE1 maturation factor [Source:HGNC                  |              |                          |             |                     |
| Symbol;Acc:HGNC:17589]"                                      |              |                          |             |                     |
| 466                                                          | 3.722106156  | 2.203213502              | 3.160735538 | 533 257 191         |
| 1.814095231                                                  | 1.491405162  | 2.752528658              |             |                     |
| ENSG00000264349                                              | 6.732991517  | 12.18119566              | 2.791210996 | 0                   |

|                                        |                             |                        |                |                |              |      |
|----------------------------------------|-----------------------------|------------------------|----------------|----------------|--------------|------|
| 0                                      | 0                           | 7.235132724            | 0              | 5.197589723    |              |      |
| 0.046923071                            | 1                           | MIR4258                | 1              | 154975693      | 154975783    |      |
| +                                      | 91                          | miRNA                  | microRNA       | 4258           | [Source:HGNC |      |
| Symbol;Acc:HGNC:38281]                 | -                           | 7                      | 14             | 3              | 0            | 0    |
| 0                                      | 3.719271346                 | 6.704173439            | 1.538954919    | 0              |              |      |
| 0                                      | 0                           |                        |                |                |              |      |
| ENSG00000118655                        | 1176.349804                 | 983.1965068            | 1201.151132    |                |              |      |
| 1416.158865                            | 1326.051093                 | 1421.68721             | 1120.232481    |                |              |      |
| 1387.965722                            | -0.309576948                | 0.04694123             | 1              | DCLRE1B        | 1            |      |
| 113905141                              | 113914086                   | +                      | 3940           | protein_coding |              |      |
| DNA cross-link repair 1B               | [Source:HGNC                | Symbol;Acc:HGNC:17641] |                |                |              |      |
| -                                      | 1223                        | 1130                   | 1291           | 1285           | 1094         | 1540 |
| 15.00829825                            | 12.49800861                 | 15.29593595            | 18.1225351     |                |              |      |
| 17.06744297                            | 18.17420896                 |                        |                |                |              |      |
| ENSG00000197757                        | 11.54227117                 | 11.31111026            | 3.721614661    | 0              |              |      |
| 0                                      | 0.923173513                 | 8.858332029            | 0.307724504    |                |              |      |
| 4.527239922                            | 0.046994292                 | 1                      | H0XC6          | 12             | 53990624     |      |
| 54030823                               | +                           | 3540                   | protein_coding | homeobox C6    |              |      |
| [Source:HGNC                           | Symbol;Acc:HGNC:5128]       | Homeobox               | 12             | 13             |              |      |
| 4                                      | 0                           | 0                      | 1              | 0.163900093    | 0.160028999  |      |
| 0.052747607                            | 0                           | 0                      | 0.01313493     |                |              |      |
| ENSG00000183458                        | 180.828915                  | 140.0837501            | 321.9196682    |                |              |      |
| 168.6165808                            | 81.21153859                 | 108.011301             | 214.2774444    |                |              |      |
| 119.2798068                            | 0.844309243                 | 0.047004846            | 1              | AC138932.1     |              |      |
| 16                                     | 14911551                    | 14935708               | +              | 6830           |              |      |
| transcribed_unprocessed_pseudogene     | polycystic kidney disease 1 |                        |                |                |              |      |
| (autosomal dominant) (PKD1) pseudogene | -                           | 188                    | 161            | 346            |              |      |
| 153                                    | 67                          | 117                    | 1.330878356    | 1.027220718    |              |      |
| 2.364838194                            | 1.244751822                 | 0.602977989            | 0.796519067    |                |              |      |
| ENSG00000137492                        | 1864.076794                 | 2591.114334            | 1919.422761    |                |              |      |
| 2578.841824                            | 2610.89036                  | 2673.510493            | 2124.871296    |                |              |      |
| 2621.080892                            | -0.30259947                 | 0.047058897            | 0.262074246    | THAP12         |              |      |
| 11                                     | 76349956                    | 76380971               | -              | 7727           |              |      |
| protein_coding                         | THAP domain containing 12   | [Source:HGNC           |                |                |              |      |
| Symbol;Acc:HGNC:9440]                  | THAP                        | 1938                   | 2978           | 2063           | 2340         | 2154 |
| 2896                                   | 12.1267403                  | 16.79470496            | 12.46333738    |                |              |      |
| 16.82739886                            | 17.1349226                  | 17.42684078            |                |                |              |      |
| ENSG00000102710                        | 1787.12832                  | 1506.117835            | 1209.524765    |                |              |      |
| 1319.176779                            | 1136.96154                  | 1059.803193            | 1500.92364     |                |              |      |
| 1171.980504                            | 0.357065674                 | 0.047078576            | 1              | SUPT20H        | 13           |      |
| 37009312                               | 37059713                    | -                      | 10933          | protein_coding |              |      |
| "SPT20 homolog, SAGA complex component | [Source:HGNC                |                        |                |                |              |      |
| Symbol;Acc:HGNC:20596]"                | -                           | 1858                   | 1731           | 1300           | 1197         | 938  |
| 1148                                   | 8.216891986                 | 6.899479324            | 5.550729198    |                |              |      |
| 6.083686776                            | 5.273644501                 | 4.882402261            |                |                |              |      |
| ENSG00000105671                        | 4445.698113                 | 3415.955297            | 3841.636734    |                |              |      |
| 3921.162055                            | 4899.358791                 | 5587.969273            | 3901.096714    |                |              |      |
| 4802.830039                            | -0.300258595                | 0.047104848            | 0.262074246    | DDX49          |              |      |
| 19                                     | 18919675                    | 18928633               | +              | 2780           |              |      |
| protein_coding                         | DEAD-box helicase 49        | [Source:HGNC           |                |                |              |      |

|                                                               |              |                                        |                  |                |             |      |
|---------------------------------------------------------------|--------------|----------------------------------------|------------------|----------------|-------------|------|
| Symbol;Acc:HGNC:18684]                                        | -            | 4622                                   | 3926             | 4129           | 3558        | 4042 |
| 6053                                                          | 80.38710002  | 61.54093597                            | 69.33397871      |                |             |      |
| 71.11696126                                                   | 89.37146426  | 101.2411095                            |                  |                |             |      |
| ENSG00000260051                                               | 10.58041524  | 3.480341617                            | 7.443229322      | 0              |             |      |
| 0                                                             | 0            | 7.167995393                            | 0                | 5.182640239    |             |      |
| 0.047107282                                                   | 1            | AL031600.1                             | 16               | 1451760        | 1452653     | +    |
| 570                                                           | antisense    | "novel transcript, antisense to CLCN7" |                  |                |             |      |
| -                                                             | 11           | 4                                      | 8                | 0              | 0           |      |
| 0.933080355                                                   | 0.305804402  | 0.655180808                            | 0                | 0              | 0           |      |
| ENSG00000256588                                               | 16.35155083  | 9.570939447                            | 0                | 0              | 0           |      |
| 0                                                             | 8.640830091  | 0                                      | 5.452743137      | 0.047111522    |             |      |
| 1                                                             | AC027544.2   | 11                                     | 18507608         | 18508820       |             |      |
| -                                                             | 630          | sense_intronic                         | novel transcript | -              |             |      |
| 17                                                            | 11           | 0                                      | 0                | 0              | 1.304696774 |      |
| 0.760870478                                                   | 0            | 0                                      | 0                | 0              |             |      |
| ENSG00000279901                                               | 0            | 0                                      | 0                | 12.12276071    | 12.12112516 |      |
| 0                                                             | 0            | 8.081295291                            | -5.57460031      | 0.047196555    |             |      |
| 1                                                             | AC092117.2   | 16                                     | 2683106          | 2684764        | +           | 1659 |
| TEC                                                           | tec          | -                                      | 0                | 0              | 11          | 10   |
| 0                                                             | 0            | 0                                      | 0                | 0.368432848    | 0.370510887 |      |
| 0                                                             |              |                                        |                  |                |             |      |
| ENSG00000135269                                               | 8.656703379  | 5.220512425                            | 21.3992843       |                |             |      |
| 2.204138311                                                   | 0            | 0                                      | 11.75883337      | 0.73471277     |             |      |
| 4.015272945                                                   | 0.04722506   | 1                                      | TES              | 7              | 116210493   |      |
| 116258783                                                     | +            | 4280                                   | protein_coding   | testin LIM     |             |      |
| domain protein [Source:HGNC Symbol;Acc:HGNC:14620]            | -            | 9                                      |                  |                |             |      |
| 6                                                             | 23           | 2                                      | 0                | 0              | 0.10167167  |      |
| 0.061089431                                                   | 0.25085924   | 0.025965594                            | 0                | 0              |             |      |
| ENSG00000174715                                               | 8.656703379  | 6.09059783                             | 6.512825656      | 0              |             |      |
| 0                                                             | 0            | 7.086708955                            | 0                | 5.166698837    |             |      |
| 0.047288958                                                   | 1            | PPIAP72 3                              | 138643874        | 138644694      |             |      |
| -                                                             | 504          | processed_pseudogene                   | peptidylprolyl   |                |             |      |
| isomerase A pseudogene 72 [Source:HGNC Symbol;Acc:HGNC:53696] | -            |                                        |                  |                |             |      |
| 9                                                             | 7            | 7                                      | 0                | 0              | 0.863402277 |      |
| 0.60523788                                                    | 0.648356008  | 0                                      | 0                | 0              |             |      |
| ENSG00000198805                                               | 1311.009634  | 1416.499038                            | 1363.04137       |                |             |      |
| 1315.870572                                                   | 1847.259475  | 2046.675678                            | 1363.51668       |                |             |      |
| 1736.601908                                                   | -0.349189877 | 0.047305245                            | 1                | PNP            | 14          |      |
| 20468954                                                      | 20477094     | +                                      | 4139             | protein_coding |             |      |
| purine nucleoside phosphorylase [Source:HGNC                  |              |                                        |                  |                |             |      |
| Symbol;Acc:HGNC:7892]                                         | -            | 1363                                   | 1628             | 1465           | 1194        | 1524 |
| 2217                                                          | 15.92214761  | 17.14026657                            | 16.52297456      |                |             |      |
| 16.02953574                                                   | 22.63272783  | 24.90584522                            |                  |                |             |      |
| ENSG00000122490                                               | 764.6754651  | 867.475148                             | 767.5830238      |                |             |      |
| 869.5325636                                                   | 1019.386626  | 1197.356046                            | 799.9112123      |                |             |      |
| 1028.758412                                                   | -0.363421094 | 0.04738455                             | 1                | PQLC1          | 18          |      |
| 79902420                                                      | 79951664     | -                                      | 5225             | protein_coding |             |      |
| PQ loop repeat containing 1 [Source:HGNC                      |              |                                        |                  |                |             |      |
| Symbol;Acc:HGNC:26188]                                        | -            | 795                                    | 997              | 825            | 789         | 841  |
| 1297                                                          | 7.35668313   | 8.315099708                            | 7.370784088      |                |             |      |

|                                                                  |              |             |             |                |      |             |
|------------------------------------------------------------------|--------------|-------------|-------------|----------------|------|-------------|
| 8.39078807                                                       | 9.893661815  | 11.54209646 |             |                |      |             |
| ENSG00000250571                                                  | 527.0970502  | 522.0512425 | 673.6122536 |                |      |             |
| 244.6593525                                                      | 545.4506323  | 376.6547932 | 574.2535154 |                |      |             |
| 388.9215927                                                      | 0.563212362  | 0.047385441 | 1           | GLI4           | 8    |             |
| 143267433                                                        | 143276931    | +           | 3057        | protein_coding |      |             |
| GLI family zinc finger 4 [Source:HGNC Symbol;Acc:HGNC:4320]      |              |             |             |                |      |             |
| zf-C2H2                                                          | 548          | 600         | 724         | 222            | 450  | 408         |
| 8.667350038                                                      | 8.552919991  | 11.05577428 | 4.035241946 |                |      |             |
| 9.048246745                                                      | 6.205770956  |             |             |                |      |             |
| ENSG00000135624                                                  | 9266.520039  | 7641.09002  | 8657.406105 |                |      |             |
| 8717.367019                                                      | 10902.95208  | 10745.73969 | 8521.672054 |                |      |             |
| 10122.0196                                                       | -0.248344359 | 0.047518076 | 0.263418741 | CCT7           |      |             |
| 2                                                                | 73233420     | 73253021    | +           | 3591           |      |             |
| protein_coding chaperonin containing TCP1 subunit 7 [Source:HGNC |              |             |             |                |      |             |
| Symbol;Acc:HGNC:1622]                                            |              |             |             |                |      |             |
|                                                                  | -            | 9634        | 8782        | 9305           | 7910 | 8995        |
| 11640                                                            | 129.715673   | 106.5704072 | 120.9614567 |                |      |             |
| 122.397662                                                       | 153.968941   | 150.7192045 |             |                |      |             |
| ENSG00000158164                                                  | 27.893822    | 28.71281834 | 12.09524765 |                |      |             |
| 71.6344951                                                       | 81.21153859  | 30.46472592 | 22.90062933 |                |      |             |
| 61.10358654                                                      | -1.412589117 | 0.047567023 | 1           | TMSB15A X      |      |             |
| 102513676                                                        | 102516784    | -           | 685         | protein_coding |      |             |
| thymosin beta 15a [Source:HGNC Symbol;Acc:HGNC:30744]            |              |             |             |                |      |             |
| 29                                                               | 33           | 13          | 65          | 67             | 33   | 2.046956638 |
| 2.099336062                                                      | 0.885928793  | 5.27272145  | 6.012174696 |                |      |             |
| 2.240032846                                                      |              |             |             |                |      |             |
| ENSG00000162813                                                  | 899.3352954  | 1083.256328 | 1066.2426   |                |      |             |
| 1358.851269                                                      | 1168.476466  | 1281.364836 | 1016.278075 |                |      |             |
| 1269.56419                                                       | -0.321056677 | 0.047573815 | 1           | BPNT1          | 1    |             |
| 220057482                                                        | 220090462    | -           | 3113        | protein_coding |      |             |
| "3'(2'), 5'-bisphosphate nucleotidase 1 [Source:HGNC             |              |             |             |                |      |             |
| Symbol;Acc:HGNC:1096]"                                           |              |             |             |                |      |             |
|                                                                  | -            | 935         | 1245        | 1146           | 1233 | 964         |
| 1388                                                             | 14.52224324  | 17.42805125 | 17.18507899 |                |      |             |
| 22.00878154                                                      | 19.03466656  | 20.7320078  |             |                |      |             |
| ENSG00000284954                                                  | 12.5041271   | 13.05128106 | 14.88645864 |                |      |             |
| 3.306207466                                                      | 0            | 0           | 13.48062227 | 1.102069155    |      |             |
| 3.625191655                                                      | 0.04757785   | 1           | AL662884.3  | 6              |      |             |
| 32152802                                                         | 32154365     | -           | 1060        |                |      |             |
| bidirectional_promoter_lncRNA uncharacterized LOC100507547       |              |             |             |                |      |             |
| [Source:NCBI gene;Acc:100507547]                                 |              |             |             |                |      |             |
|                                                                  | -            |             | 13          | 15             |      | 16          |
| 3                                                                | 0            | 0           | 0.592978167 | 0.616657463    |      |             |
| 0.704628416                                                      | 0.157263318  | 0           | 0           |                |      |             |
| ENSG00000105755                                                  | 153.896949   | 275.8170731 | 235.3921273 |                |      |             |
| 330.6207466                                                      | 368.482205   | 305.5704327 | 221.7020498 |                |      |             |
| 334.8911281                                                      | -0.593664274 | 0.047665185 | 1           | ETHE1          | 19   |             |
| 43506719                                                         | 43527244     | -           | 1604        | protein_coding |      |             |
| "ETHE1, persulfide dioxygenase [Source:HGNC                      |              |             |             |                |      |             |
| Symbol;Acc:HGNC:23287]"                                          |              |             |             |                |      |             |
|                                                                  | -            | 160         | 317         | 253            | 300  | 304         |
| 331                                                              | 4.822995261  | 8.612187887 | 7.363125334 |                |      |             |
| 10.39271301                                                      | 11.64974931  | 9.59521362  |             |                |      |             |
| ENSG00000175334                                                  | 2845.169844  | 2789.493806 | 3053.584829 |                |      |             |



|                                     |                                                       |             |              |                       |                |      |
|-------------------------------------|-------------------------------------------------------|-------------|--------------|-----------------------|----------------|------|
| 3343.677818                         | 3381.79392                                            | 3462.823846 | 2896.082826  |                       |                |      |
| 3396.098528                         | -0.229862258                                          | 0.047720835 | 0.263418741  | BANF1                 |                |      |
| 11                                  | 66002079                                              | 66004149    | +            | 1645                  |                |      |
| protein_coding                      | barrier to autointegration factor 1 [Source:HGNC      |             |              |                       |                |      |
| Symbol;Acc:HGNC:17397]              | -                                                     | 2958        | 3206         | 3282                  | 3034           | 2790 |
| 3751                                | 86.94277223                                           | 84.92903969 | 93.13624197  |                       |                |      |
| 102.4853333                         | 104.2523039                                           | 106.0259518 |              |                       |                |      |
| ENSG00000229927                     | 0                                                     | 0.870085404 | 8.373632987  | 28.65379804           |                |      |
|                                     | 24.24225033                                           | 12.00125567 | 3.081239464  | 21.63243468           |                |      |
|                                     | -2.81128813                                           | 0.047759377 | 1            | RHEBP1                | 10             |      |
| 46634911                            | 46635466                                              | -           | 556          | processed_pseudogene  |                |      |
|                                     | RHEB pseudogene 1 [Source:HGNC Symbol;Acc:HGNC:10010] |             |              |                       |                |      |
|                                     | 0                                                     | 1           | 9            | 26                    | 20             | 13   |
|                                     |                                                       |             |              |                       |                | 0    |
| 0.078376128                         | 0.755637937                                           | 2.598427477 | 2.211070368  |                       |                |      |
| 1.087175305                         |                                                       |             |              |                       |                |      |
| ENSG00000235636                     | 138.5072541                                           | 123.5521274 | 106.0660178  |                       |                |      |
| 70.53242595                         | 75.15097601                                           | 57.23675779 | 122.7084664  |                       |                |      |
| 67.64005325                         | 0.861198931                                           | 0.04776987  | 1            | NUS1P1                | X              |      |
|                                     | 47512602                                              | 47513483    | -            | 882                   |                |      |
| processed_pseudogene                | NUS1 pseudogene 1 [Source:HGNC                        |             |              |                       |                |      |
| Symbol;Acc:HGNC:38472]              | -                                                     | 144         | 142          | 114                   | 64             | 62   |
| 62                                  | 7.893963672                                           | 7.01581869  | 6.033680398  |                       |                |      |
| 4.032027008                         | 4.320862682                                           | 3.268542396 |              |                       |                |      |
| ENSG00000130449                     | 494.3939485                                           | 573.3862814 | 577.7806761  |                       |                |      |
| 450.7462846                         | 346.6641797                                           | 418.1976013 | 548.520302   |                       |                |      |
| 405.2026885                         | 0.436330742                                           | 0.047787225 | 1            | ZSWIM6                | 5              |      |
|                                     | 61332273                                              | 61546170    | +            | 5501                  | protein_coding |      |
|                                     | zinc finger SWIM-type containing 6 [Source:HGNC       |             |              |                       |                |      |
| Symbol;Acc:HGNC:29316]              | -                                                     | 514         | 659          | 621                   | 409            | 286  |
| 453                                 | 4.517755159                                           | 5.220383008 | 5.269822544  |                       |                |      |
| 4.131366339                         | 3.195742279                                           | 3.829019475 |              |                       |                |      |
| ENSG00000235527                     | 14.42783896                                           | 11.31111026 | 0            | 0                     | 0              |      |
|                                     | 0                                                     | 8.57964974  | 0            | 5.442731682           | 0.047794009    |      |
|                                     | 1                                                     | HIPK1-AS1   | 1            | 113924000             | 113929492      |      |
|                                     | -                                                     | 3087        | antisense    | HIPK1 antisense RNA 1 |                |      |
| [Source:HGNC Symbol;Acc:HGNC:50576] | -                                                     |             | 15           | 13                    | 0              |      |
|                                     | 0                                                     | 0           | 0.234939395  | 0.18351236            | 0              |      |
|                                     | 0                                                     | 0           |              |                       |                |      |
| ENSG00000175315                     | 0                                                     | 0           | 0            | 0                     | 29.54155241    |      |
|                                     | 0                                                     | 9.847184136 | -5.866885458 | 0.047803152           | 1              |      |
|                                     | CST6                                                  | 11          | 66011841     | 66013505              | +              | 759  |
| protein_coding                      | cystatin E/M [Source:HGNC                             |             |              |                       |                |      |
| Symbol;Acc:HGNC:2478]               | -                                                     | 0           | 0            | 0                     | 0              | 0    |
| 32                                  | 0                                                     | 0           | 0            | 0                     | 1.960375294    |      |
| ENSG00000236088                     | 799.3022786                                           | 662.1349926 | 762.0006018  |                       |                |      |
| 592.9132056                         | 579.3897828                                           | 543.749199  | 741.1459577  |                       |                |      |
| 572.0173958                         | 0.373804324                                           | 0.047810625 | 1            | COX10-AS1             |                |      |
|                                     | 17                                                    | 13756478    | 14069495     | -                     | 6456           |      |
| processed_transcript                | COX10 antisense RNA 1 [Source:HGNC                    |             |              |                       |                |      |
| Symbol;Acc:HGNC:38873]              | -                                                     | 831         | 761          | 819                   | 538            | 478  |

|                                                                         |                                                                                                      |             |             |                |       |
|-------------------------------------------------------------------------|------------------------------------------------------------------------------------------------------|-------------|-------------|----------------|-------|
| 589                                                                     | 6.223557674                                                                                          | 5.136647137 | 5.921972903 |                |       |
| 4.630531017                                                             | 4.551051343                                                                                          | 4.242118453 |             |                |       |
| ENSG00000172725                                                         | 2515.253259                                                                                          | 2411.876741 | 2323.217952 |                |       |
| 2432.266626                                                             | 3169.67423                                                                                           | 3213.566998 | 2416.782651 |                |       |
| 2938.502618                                                             | -0.282103892                                                                                         | 0.047884836 | 0.263418741 | COR01B         |       |
| 11                                                                      | 67435510                                                                                             | 67443821    | -           | 5327           |       |
| protein_coding                                                          | coronin 1B [Source:HGNC Symbol;Acc:HGNC:2253]                                                        |             |             |                | -     |
| 2615                                                                    | 2772                                                                                                 | 2497        | 2207        | 2615           | 3481  |
| 22.67613986                                                             | 21.88174141                                                                                          | 23.02139731 | 30.17424113 |                |       |
| 30.38451753                                                             |                                                                                                      |             |             |                |       |
| ENSG00000164733                                                         | 66022.75296                                                                                          | 82078.63652 | 72980.8635  |                |       |
| 68300.73591                                                             | 59731.69269                                                                                          | 61807.38985 | 73694.08433 |                |       |
| 63279.93948                                                             | 0.219806215                                                                                          | 0.047920403 | 0.263418741 | CTSB           |       |
| 8                                                                       | 11842524                                                                                             | 11869448    | -           | 7428           |       |
| protein_coding                                                          | cathepsin B [Source:HGNC Symbol;Acc:HGNC:2527]                                                       |             |             |                | -     |
| 68641                                                                   | 94334                                                                                                | 78440       | 61975       | 49279          | 66951 |
| 553.4201308                                                             | 492.9600508                                                                                          | 463.6141515 | 407.7907322 |                |       |
| 419.0985818                                                             |                                                                                                      |             |             |                |       |
| ENSG00000231584                                                         | 12.5041271                                                                                           | 25.23247672 | 9.304036652 |                |       |
| 4.408276622                                                             | 0                                                                                                    | 0           | 15.68021349 | 1.469425541    |       |
| 3.426908362                                                             | 0.047936896                                                                                          | 1           | FAHD2CP 2   | 96010551       |       |
| 96023380                                                                | +                                                                                                    | 2140        |             |                |       |
| transcribed_unprocessed_pseudogene                                      | "fumarylacetoacetate hydrolase domain containing 2C, pseudogene [Source:HGNC Symbol;Acc:HGNC:44135]" |             |             |                |       |
| -                                                                       | 13                                                                                                   | 29          | 10          | 4              | 0     |
| 0.293718158                                                             | 0.590531165                                                                                          | 0.21813847  | 0.103862378 | 0              |       |
| 0                                                                       |                                                                                                      |             |             |                |       |
| ENSG00000078124                                                         | 706.9641092                                                                                          | 743.0529352 | 653.143373  |                |       |
| 933.4525746                                                             | 972.1142381                                                                                          | 788.3901799 | 701.0534725 |                |       |
| 897.9856642                                                             | -0.356358562                                                                                         | 0.047982221 | 1           | ACER3          | 11    |
| 76860867                                                                | 77026797                                                                                             | +           | 8442        | protein_coding |       |
| alkaline ceramidase 3 [Source:HGNC Symbol;Acc:HGNC:16066]               |                                                                                                      |             |             |                |       |
| -                                                                       | 735                                                                                                  | 854         | 702         | 847            | 802   |
| 4.20962304                                                              | 4.408299782                                                                                          | 3.881841513 | 5.575067194 |                |       |
| 5.839509653                                                             | 4.703742523                                                                                          |             |             |                |       |
| ENSG00000172175                                                         | 721.3919482                                                                                          | 669.0956759 | 680.1250793 |                |       |
| 1233.215385                                                             | 865.4483366                                                                                          | 698.8423491 | 690.2042344 |                |       |
| 932.5020236                                                             | -0.433594763                                                                                         | 0.047983314 | 1           | MALT1          | 18    |
| 58671386                                                                | 58754477                                                                                             | +           | 11527       | protein_coding |       |
| MALT1 paracaspase [Source:HGNC Symbol;Acc:HGNC:6819]                    |                                                                                                      |             |             |                |       |
| 750                                                                     | 769                                                                                                  | 731         | 1119        | 714            | 757   |
| 2.907158058                                                             | 2.96037767                                                                                           | 5.394185    | 3.807406779 |                |       |
| 3.053589155                                                             |                                                                                                      |             |             |                |       |
| ENSG00000114745                                                         | 974.360058                                                                                           | 968.4050549 | 1122.06682  |                |       |
| 1118.600193                                                             | 1557.564583                                                                                          | 1227.820772 | 1021.610644 |                |       |
| 1301.328516                                                             | -0.348651594                                                                                         | 0.04803102  | 1           | GORASP1        | 3     |
| 39096659                                                                | 39108363                                                                                             | -           | 6256        | protein_coding |       |
| golgi reassembly stacking protein 1 [Source:HGNC Symbol;Acc:HGNC:16769] |                                                                                                      |             |             |                |       |
| 1330                                                                    | 7.829137524                                                                                          | 7.752772178 | 8.999048731 | 1206           | 1015  |
|                                                                         |                                                                                                      |             |             | 1285           |       |

|                                                                |              |                                    |             |                |             |             |
|----------------------------------------------------------------|--------------|------------------------------------|-------------|----------------|-------------|-------------|
| 9.015324134                                                    | 12.62565005  | 9.885210437                        |             |                |             |             |
| ENSG0000070759                                                 | 13.46598303  | 105.2803339                        | 68.84987122 |                |             |             |
| 29.7558672                                                     | 9.69690013   | 21.23299079                        | 62.53206272 |                |             |             |
| 20.22858604                                                    | 1.626220394  | 0.048045822                        | 1           | TESK2          | 1           |             |
| 45343883                                                       | 45491166     | -                                  | 3322        | protein_coding |             |             |
| testis associated actin remodelling kinase 2 [Source:HGNC      |              |                                    |             |                |             |             |
| Symbol;Acc:HGNC:11732]                                         | -            | 14                                 | 121         | 74             | 27          | 8           |
| 23                                                             | 0.203765017  | 1.587246361                        | 1.039867793 |                |             |             |
| 0.451623133                                                    | 0.148025903  | 0.321928352                        |             |                |             |             |
| ENSG00000162408                                                | 2031.439726  | 1692.316111                        | 1628.206414 |                |             |             |
| 1369.87196                                                     | 1334.53588   | 1614.630474                        | 1783.987417 |                |             |             |
| 1439.679438                                                    | 0.308679362  | 0.048070372                        | 1           | NOL9           | 1           |             |
| 6521347                                                        | 6554535      | -                                  | 7293        | protein_coding | nucleolar   |             |
| protein 9 [Source:HGNC Symbol;Acc:HGNC:26265]                  |              |                                    |             |                |             |             |
| -                                                              |              |                                    |             | 2112           | 1945        |             |
| 1750                                                           | 1243         | 1101                               | 1749        | 14.00196271    | 11.62176233 |             |
| 11.20154353                                                    | 9.470588324  | 9.279583107                        | 11.1510205  |                |             |             |
| ENSG00000197283                                                | 488.6228129  | 304.5298915                        | 380.5350991 |                |             |             |
| 306.3752252                                                    | 189.0895525  | 287.1069625                        | 391.2292678 |                |             |             |
| 260.8572467                                                    | 0.582937513  | 0.048086864                        | 1           | SYNGAP1        | 6           |             |
| 33419661                                                       | 33457541     | +                                  | 12129       | protein_coding |             |             |
| synaptic Ras GTPase activating protein 1 [Source:HGNC          |              |                                    |             |                |             |             |
| Symbol;Acc:HGNC:11497]                                         | -            | 508                                | 350         | 409            | 278         | 156         |
| 311                                                            | 2.0250695    | 1.25748162                         | 1.574143599 |                |             |             |
| 1.273596461                                                    | 0.790582074  | 1.192247474                        |             |                |             |             |
| ENSG00000232956                                                | 621.3589314  | 551.6341463                        | 494.9747499 |                |             |             |
| 598.4235514                                                    | 701.8131469  | 970.2553619                        | 555.9892759 |                |             |             |
| 756.8306867                                                    | -0.446028987 | 0.048099698                        | 1           | SNHG15         | 7           |             |
| 44983023                                                       | 44986961     | -                                  | 3647        | lincRNA        | small       |             |
| nucleolar RNA host gene 15 [Source:HGNC Symbol;Acc:HGNC:27797] |              |                                    |             |                |             |             |
| -                                                              |              |                                    |             |                |             |             |
| 646                                                            | 634          | 532                                | 543         | 579            | 1051        | 8.56442028  |
| 7.575513776                                                    | 6.809604749  | 8.273249275                        | 9.758659405 |                |             |             |
| 13.39978934                                                    |              |                                    |             |                |             |             |
| ENSG00000140406                                                | 699.2692618  | 686.4973839                        | 735.9492992 |                |             |             |
| 835.3684198                                                    | 810.9032734  | 1102.269174                        | 707.2386483 |                |             |             |
| 916.1802891                                                    | -0.374468838 | 0.048159807                        | 1           | TLNRD1         | 15          |             |
| 81000944                                                       | 81005788     | +                                  | 4845        | protein_coding |             |             |
| talin rod domain containing 1 [Source:HGNC                     |              |                                    |             |                |             |             |
| Symbol;Acc:HGNC:13519]                                         | -            | 727                                | 789         | 791            | 758         | 669         |
| 1194                                                           | 7.255073991  | 7.096460987                        | 7.621294397 |                |             |             |
| 8.693356064                                                    | 8.487498227  | 11.45886396                        |             |                |             |             |
| ENSG00000215146                                                | 6.732991517  | 19.14187889                        | 0           | 0              | 0           |             |
| 0                                                              | 8.624956803  | 0                                  | 5.451344561 | 0.04820188     |             |             |
| 1                                                              | BX322639.1   | 10                                 | 42331866    | 42367974       |             |             |
| -                                                              | 7208         | transcribed_unprocessed_pseudogene |             |                |             | zinc        |
| finger protein 91 pseudogene [Source:NCBI gene;Acc:441666]     |              |                                    |             |                |             |             |
| -                                                              |              |                                    |             |                |             |             |
| 7                                                              | 22           | 0                                  | 0           | 0              | 0           | 0.046955285 |
| 0.133004551                                                    | 0            | 0                                  | 0           | 0              |             |             |
| ENSG00000113070                                                | 695.4218381  | 904.018735                         | 662.4474096 |                |             |             |
| 618.2607962                                                    | 482.4207815  | 594.5237422                        | 753.9626609 |                |             |             |
| 565.06844                                                      | 0.415690909  | 0.04820283                         | 1           | HBEGF          | 5           |             |

|                                                                     |              |                |             |                      |             |         |
|---------------------------------------------------------------------|--------------|----------------|-------------|----------------------|-------------|---------|
| 140332843                                                           | 140346631    | -              | 3018        | protein_coding       |             |         |
| heparin binding EGF like growth factor [Source:HGNC                 |              |                |             |                      |             |         |
| Symbol;Acc:HGNC:3059]                                               | -            | 723            | 1039        | 712                  | 561         | 398     |
| 644                                                                 | 11.58297925  | 15.00219858    | 11.01302928 |                      |             |         |
| 10.32893797                                                         | 8.10608581   | 9.921964071    |             |                      |             |         |
| ENSG00000167695                                                     | 1283.115812  | 1439.121259    | 1583.547038 |                      |             |         |
| 1752.289957                                                         | 1592.715846  | 1970.97545     | 1435.26137  |                      |             |         |
| 1771.993751                                                         | -0.30448745  | 0.048234478    | 1           | FAM57A               | 17          |         |
| 732412                                                              | 742972       | +              | 2740        | protein_coding       | family with |         |
| sequence similarity 57 member A [Source:HGNC Symbol;Acc:HGNC:29646] |              |                |             |                      |             |         |
| -                                                                   | 1334         | 1654           | 1702        | 1590                 | 1314        | 2135    |
| 23.54000134                                                         | 26.30531702  | 28.99713088    | 32.24471964 |                      |             |         |
| 29.4776028                                                          | 36.23083429  |                |             |                      |             |         |
| ENSG00000112118                                                     | 6366.524407  | 5430.203008    | 5895.968026 |                      |             |         |
| 7351.903336                                                         | 6722.376015  | 6593.305228    | 5897.565147 |                      |             |         |
| 6889.19486                                                          | -0.224242051 | 0.048286153    | 0.264636945 |                      | MCM3        |         |
| 6                                                                   | 52264009     | 52284881       | -           | 3650                 |             |         |
| protein_coding minichromosome maintenance complex component 3       |              |                |             |                      |             |         |
| [Source:HGNC Symbol;Acc:HGNC:6945]                                  |              |                |             |                      |             |         |
| 6671                                                                | 5546         | 7142           | 87.68003876 | 74.51091831          |             |         |
| 81.04698781                                                         | 101.55706    | 93.39730849    | 90.98252795 |                      |             |         |
| ENSG00000112357                                                     | 135.6216863  | 204.47007      | 145.1429718 |                      |             |         |
| 124.5338146                                                         | 90.90843872  | 41.54280807    | 161.7449093 |                      |             |         |
| 85.66168712                                                         | 0.920910537  | 0.048323962    | 1           | PEX7                 | 6           |         |
| 136822564                                                           | 136913937    | +              | 1835        | protein_coding       |             |         |
| peroxisomal biogenesis factor 7 [Source:HGNC                        |              |                |             |                      |             |         |
| Symbol;Acc:HGNC:8860]                                               | -            | 141            | 235         | 156                  | 113         | 75      |
| 45                                                                  | 3.715217644  | 5.580722032    | 3.968574757 |                      |             |         |
| 3.421798397                                                         | 2.512306113  | 1.140269383    |             |                      |             |         |
| ENSG00000135686                                                     | 1627.460235  | 1330.360583    | 1451.429718 |                      |             |         |
| 1227.705039                                                         | 1215.748854  | 1136.426594    | 1469.750179 |                      |             |         |
| 1193.293496                                                         | 0.300696582  | 0.048486305    | 1           | KLHL36               | 16          |         |
| 84648525                                                            | 84667686     | +              | 9995        | protein_coding       |             |         |
| kelch like family member 36 [Source:HGNC                            |              |                |             |                      |             |         |
| Symbol;Acc:HGNC:17844]                                              | -            | 1692           | 1529        | 1560                 | 1114        | 1003    |
| 1231                                                                | 8.185001753  | 6.66627591     | 7.285977667 |                      |             |         |
| 6.193190459                                                         | 6.168300099  | 5.726724262    |             |                      |             |         |
| ENSG00000122986                                                     | 10.58041524  | 6.960683234    | 3.721614661 |                      | 0           |         |
| 0                                                                   | 0            | 7.087571045    | 0           | 5.166858776          |             |         |
| 0.048544721                                                         | 1            | HVCN1          | 12          | 110627841            | 110704950   |         |
| -                                                                   | 3688         | protein_coding | hydrogen    | voltage              | gated       | channel |
| 1 [Source:HGNC Symbol;Acc:HGNC:28240]                               |              |                |             |                      |             |         |
| 0                                                                   | 0            | 0              | 0.144212528 | 0.094527391          |             |         |
| 0.050630838                                                         | 0            | 0              | 0           |                      |             |         |
| ENSG00000214535                                                     | 21.16083048  | 6.09059783     | 0.930403665 |                      |             |         |
| 1.102069155                                                         | 0            | 0              | 9.393943992 | 0.367356385          |             |         |
| 4.610754648                                                         | 0.048561503  | 1              | RPS15AP1    | 20                   |             |         |
| 21166206                                                            | 21166596     | -              | 391         | processed_pseudogene |             |         |
| ribosomal protein S15a pseudogene 1 [Source:HGNC                    |              |                |             |                      |             |         |
| Symbol;Acc:HGNC:16598]                                              | -            | 22             | 7           | 1                    | 1           | 0       |

|                                 |                                        |                |             |                                |             |                |
|---------------------------------|----------------------------------------|----------------|-------------|--------------------------------|-------------|----------------|
|                                 | 0                                      | 2.720490038    | 0.780153175 | 0.119390365                    |             |                |
| 0.142113484                     | 0                                      | 0              |             |                                |             |                |
| ENSG00000279368                 | 0                                      | 18.27179349    | 7.443229322 | 0                              | 0           |                |
|                                 | 0                                      | 8.57167427     | 0           | 5.442647396                    | 0.048568479 |                |
|                                 | 1                                      | AL031123.3     | 6           | 6685148                        | 6686984     | +              |
| TEC                             | TEC                                    | -              | 0           | 21                             | 8           | 0              |
| 0                               | 0                                      | 0.498159866    | 0.203295079 | 0                              | 0           |                |
| 0                               |                                        |                |             |                                |             |                |
| ENSG00000169933                 | 0                                      | 0              | 0           | 2.204138311                    | 6.060562582 |                |
|                                 | 12.00125567                            | 0              | 6.755318853 | -5.32146049                    |             |                |
| 0.048580044                     | 1                                      | FRMPD4         | X           | 12138466                       | 12724523    |                |
| +                               | 8478                                   | protein_coding |             | FERM and PDZ domain containing |             |                |
| 4 [Source:HGNC                  | Symbol;Acc:HGNC:29007]                 | -              | 0           | 0                              | 0           |                |
|                                 | 2                                      | 5              | 13          | 0                              | 0           | 0.013108368    |
|                                 | 0.036251331                            | 0.071298593    |             |                                |             |                |
| ENSG00000174748                 | 30542.77323                            | 35976.29129    | 35600.03544 |                                |             |                |
| 37649.98856                     | 39729.41195                            | 40284.52257    | 34039.69999 |                                |             |                |
| 39221.30769                     | -0.204412665                           | 0.048606916    | 0.265141844 |                                |             | RPL15          |
|                                 | 3                                      | 23916545       | 23924374    | +                              | 7222        |                |
| protein_coding                  | ribosomal protein L15                  | [Source:HGNC   |             |                                |             |                |
| Symbol;Acc:HGNC:10306]          | -                                      | 31754          | 41348       | 38263                          | 34163       | 32777          |
|                                 | 43637                                  | 212.5896774    | 249.4914237 | 247.3247447                    |             |                |
| 262.851561                      | 278.9710116                            | 280.949601     |             |                                |             |                |
| ENSG00000182095                 | 6699.326559                            | 4604.491959    | 6417.924482 |                                |             |                |
| 4587.913894                     | 4648.4515                              | 5261.165849    | 5907.247667 |                                |             |                |
| 4832.510414                     | 0.289492813                            | 0.048667103    | 0.265141844 |                                |             | TNRC18         |
|                                 | 7                                      | 5306790        | 5425414     | -                              | 12572       | protein_coding |
| trinucleotide repeat containing | 18 [Source:HGNC                        |                |             |                                |             |                |
| Symbol;Acc:HGNC:11962]          | -                                      | 6965           | 5292        | 6898                           | 4163        | 3835           |
|                                 | 5699                                   | 26.78662297    | 18.34315606 | 25.61325973                    |             |                |
| 18.39984151                     | 18.75030585                            | 21.07780114    |             |                                |             |                |
| ENSG00000237685                 | 5.771135586                            | 0              | 1.86080733  | 12.12276071                    |             |                |
|                                 | 20.60591278                            | 22.15616431    | 2.543980972 | 18.29494593                    |             |                |
|                                 | -2.858243887                           | 0.048774739    | 1           | AL139039.3                     | 6           |                |
|                                 | 10511036                               | 10514546       | -           | 1475                           | antisense   |                |
|                                 | "novel transcript, antisense to GCNT2" | -              | 6           | 0                              |             |                |
|                                 | 2                                      | 11             | 17          | 24                             | 0.196680112 | 0              |
| 0.063297129                     | 0.414393284                            | 0.708441936    | 0.756571957 |                                |             |                |
| ENSG00000174903                 | 3237.607064                            | 2935.668154    | 2691.657803 |                                |             |                |
| 3008.648794                     | 3833.911889                            | 3914.255694    | 2954.977674 |                                |             |                |
| 3585.605459                     | -0.279189806                           | 0.048815423    | 0.265163069 |                                |             | RAB1B          |
|                                 | 11                                     | 66268533       | 66277492    | +                              | 2007        |                |
| protein_coding                  | "RAB1B, member RAS oncogene family     | [Source:HGNC   |             |                                |             |                |
| Symbol;Acc:HGNC:18370]"         | -                                      | 3366           | 3374        | 2893                           | 2730        | 3163           |
|                                 | 4240                                   | 81.09012234    | 73.25821011 | 67.28946835                    |             |                |
| 75.58355561                     | 96.87220375                            | 98.23121194    |             |                                |             |                |
| ENSG00000280063                 | 62.52063551                            | 31.32307455    | 66.05866023 |                                |             |                |
| 14.32689902                     | 2.424225033                            | 31.38789943    | 53.3007901  |                                |             |                |
| 16.04634116                     | 1.717691614                            | 0.048823457    | 1           | AC012676.5                     |             |                |
|                                 | 16                                     | 4346694        | 4348648     | -                              | 1955        | TEC            |
|                                 |                                        |                |             |                                |             | tec            |
|                                 |                                        |                |             |                                |             | -              |

|                                     |                                                               |                                            |             |              |              |                |
|-------------------------------------|---------------------------------------------------------------|--------------------------------------------|-------------|--------------|--------------|----------------|
| 65                                  | 36                                                            | 71                                         | 13          | 2            | 34           | 1.607562295    |
| 0.802443266                         |                                                               | 1.695343177                                |             | 0.369495058  |              | 0.062882615    |
| 0.808654809                         |                                                               |                                            |             |              |              |                |
| ENSG00000109790                     | 1186.930219                                                   |                                            | 1379.085366 |              | 1091.363499  |                |
| 953.2898194                         | 1113.931402                                                   |                                            | 772.6962302 |              | 1219.126361  |                |
| 946.6391507                         | 0.366161748                                                   |                                            | 0.048891449 |              | 1            | KLHL5 4        |
| 39045039                            |                                                               | 39126857                                   |             | +            | 5144         | protein_coding |
|                                     | kelch like family member 5 [Source:HGNC Symbol;Acc:HGNC:6356] |                                            |             |              |              |                |
| -                                   | 1234                                                          | 1585                                       | 1173        | 865          | 919          | 837            |
| 11.59886293                         | 13.42724472                                                   |                                            | 10.64493682 |              | 9.343878685  |                |
| 10.98150621                         | 7.56581149                                                    |                                            |             |              |              |                |
| ENSG00000172301                     | 1259.069414                                                   |                                            | 1408.668269 |              | 1361.180562  |                |
| 1762.20858                          | 1517.56487                                                    |                                            | 1630.324423 |              | 1342.972748  |                |
| 1636.699291                         | -0.285384161                                                  |                                            | 0.048951282 |              | 1            | COPRS 17       |
| 31851864                            |                                                               | 31859337                                   |             | -            | 1432         | protein_coding |
|                                     | coordinator of PRMT5 and differentiation stimulator           |                                            |             |              |              |                |
| [Source:HGNC Symbol;Acc:HGNC:28848] |                                                               |                                            |             |              | 1309         | 1619 1463      |
| 1599                                | 1252                                                          | 1766                                       | 44.19751431 |              | 49.26771591  |                |
| 47.69219862                         | 62.04652874                                                   |                                            | 53.74136228 |              | 57.34277413  |                |
| ENSG00000227071                     | 0                                                             | 0                                          | 0           | 0            | 7.272675098  |                |
| 16.61712323                         | 0                                                             | 7.963266109                                |             | -5.558875474 | 0.048988989  |                |
| 1                                   | FOCAD-AS1                                                     |                                            | 9           | 20683304     | 20684688     |                |
| -                                   | 423                                                           | lincRNA FOCAD antisense RNA 1 [Source:HGNC |             |              |              |                |
| Symbol;Acc:HGNC:49789]              | -                                                             | 0                                          | 0           | 0            | 0            | 6              |
| 18                                  | 0                                                             | 0                                          | 0           | 0            | 0.871883067  |                |
| 1.978623468                         |                                                               |                                            |             |              |              |                |
| ENSG00000174197                     | 3147.192606                                                   |                                            | 2487.574171 |              | 2565.122905  |                |
| 2583.2501                           | 1972.107064                                                   |                                            | 2097.450221 |              | 2733.296561  |                |
| 2217.602462                         | 0.301503919                                                   |                                            | 0.049012574 |              | 0.265448629  | MGA            |
| 15                                  | 41621224                                                      |                                            | 41773081    |              | +            | 17651          |
|                                     | protein_coding "MGA, MAX dimerization protein [Source:HGNC    |                                            |             |              |              |                |
| Symbol;Acc:HGNC:14010]" T-box       |                                                               |                                            | 3272        | 2859         | 2757         | 2344 1627      |
| 2272                                | 8.962830772                                                   |                                            | 7.058354037 |              | 7.291443032  |                |
| 7.379048011                         | 5.665856856                                                   |                                            | 5.98508097  |              |              |                |
| ENSG00000230021                     | 1.923711862                                                   |                                            | 4.350427021 |              | 8.373632987  |                |
| 11.02069155                         | 24.24225033                                                   |                                            | 36.003767   |              | 4.882590623  |                |
| 23.75556963                         | -2.283425904                                                  |                                            | 0.0490204   |              | 1            | AL669831.3     |
| 1                                   | 586071                                                        | 827796                                     | -           | 5495         |              |                |
|                                     | transcribed_processed_pseudogene uncharacterized LOC101928626 |                                            |             |              |              |                |
| [Source:NCBI gene;Acc:101928626]    |                                                               |                                            |             |              | -            | 2 5 9          |
| 10                                  | 20                                                            | 39                                         | 0.017598008 |              | 0.039651617  |                |
| 0.076457633                         | 0.101121696                                                   |                                            | 0.223722498 |              | 0.330010629  |                |
| ENSG00000255670                     | 18.27526269                                                   |                                            | 0           | 7.443229322  | 0            | 0              |
| 0                                   | 8.57283067                                                    |                                            | 0           | 5.440430252  | 0.049082173  |                |
| 1                                   | AC007619.1                                                    |                                            | 12          | 12485353     | 12491581     |                |
| +                                   | 412                                                           | lincRNA novel transcript                   |             |              | -            | 19             |
| 0                                   | 8                                                             | 0                                          | 0           | 0            | 2.229757336  | 0              |
| 0.906439467                         | 0                                                             | 0                                          | 0           |              |              |                |
| ENSG00000268564                     | 0                                                             | 0                                          | 0.930403665 |              | 5.510345777  |                |
| 24.24225033                         | 0                                                             | 0.310134555                                |             | 9.917532034  | -4.906506707 |                |

|                                                             |                                             |             |                      |                    |
|-------------------------------------------------------------|---------------------------------------------|-------------|----------------------|--------------------|
| 0.049154246                                                 | 1                                           | AC003956.1  | 19                   | 15124160           |
| 15126174                                                    | +                                           | 356         | antisense            | "novel             |
| transcript, antisense to ILVBL"                             | -                                           | 0           | 0                    | 1 5                |
| 20 0 0                                                      | 0                                           | 0           | 0.131128181          | 0.780426576        |
| 3.453244731                                                 | 0                                           |             |                      |                    |
| ENSG00000233013                                             | 0                                           | 28.71281834 | 21.3992843           | 2.204138311        |
| 0                                                           | 1.846347025                                 | 16.70403421 | 1.350161779          |                    |
| 3.608372573                                                 | 0.049249885                                 | 1           | FAM157B 9            | 138217068          |
| 138253217                                                   | +                                           | 2073        |                      |                    |
| transcribed_unprocessed_pseudogene                          |                                             |             | family with sequence |                    |
| similarity 157 member B [Source:HGNC Symbol;Acc:HGNC:34080] |                                             |             |                      | -                  |
| 0                                                           | 33 23                                       | 2           | 0 2                  | 0                  |
| 0.693702461                                                 | 0.517934177                                 | 0.053609621 | 0                    | 0.044860252        |
| ENSG00000273748                                             | 201.9897455                                 | 228.8324613 | 255.8610079          |                    |
| 174.1269266                                                 | 143.0292769                                 | 123.7052507 | 228.8944049          |                    |
| 146.9538181                                                 | 0.640500926                                 | 0.049253563 | 1                    | AL592183.1         |
| GL000219.1                                                  | 54224                                       | 83311       | -                    | 372 protein_coding |
|                                                             | -                                           | 210         | 263 275              | 158 118 134        |
| 27.29465262                                                 | 30.80856047                                 | 34.50927138 |                      | 23.60077099        |
| 19.49783665                                                 | 16.74915403                                 |             |                      |                    |
| ENSG00000261499                                             | 35.58866945                                 | 8.700854042 | 17.67766964          |                    |
| 6.612414933                                                 | 2.424225033                                 | 0           | 20.65573104          | 3.012213322        |
| 2.793009307                                                 | 0.049312933                                 | 1           | AC233699.1           | 17                 |
| 36274191                                                    | 36320547                                    | +           | 1168                 |                    |
| unprocessed_pseudogene                                      | aminopeptidase puromycin sensitive (NPEPPS) |             |                      |                    |
| pseudogene                                                  | -                                           | 37 10       | 19 6                 | 2 0                |
| 1.531651984                                                 | 0.373091844                                 | 0.759375872 |                      | 0.285443693        |
| 0.105253007                                                 | 0                                           |             |                      |                    |
| ENSG00000258366                                             | 85.60517785                                 | 103.5401631 | 135.8389351          |                    |
| 67.22621848                                                 | 42.42393807                                 | 58.1599313  | 108.328092           |                    |
| 55.93669595                                                 | 0.952003884                                 | 0.049351671 | 1                    | RTEL1 20           |
| 63657810                                                    | 63696253                                    | +           | 6440                 | protein_coding     |
| regulator of telomere elongation helicase 1 [Source:HGNC    |                                             |             |                      |                    |
| Symbol;Acc:HGNC:15888]                                      | -                                           | 89 119      | 146 61               | 35                 |
| 63                                                          | 0.668198284                                 | 0.805229527 | 1.058310303          |                    |
| 0.526327439                                                 | 0.334063892                                 | 0.45486833  |                      |                    |
| ENSG00000147394                                             | 246.2351183                                 | 233.1828883 | 225.157687           |                    |
| 147.6772668                                                 | 133.3323768                                 | 178.172488  | 234.8585645          |                    |
| 153.0607105                                                 | 0.615735113                                 | 0.049360718 | 1                    | ZNF185 X           |
| 152914442                                                   | 152973480                                   | +           | 4812                 | protein_coding     |
| zinc finger protein 185 with LIM domain [Source:HGNC        |                                             |             |                      |                    |
| Symbol;Acc:HGNC:12976]                                      | -                                           | 256 268     | 242 134              | 110                |
| 193                                                         | 2.572264139                                 | 2.426988805 | 2.34766315           |                    |
| 1.547359492                                                 | 1.405123272                                 | 1.864930744 |                      |                    |
| ENSG00000122783                                             | 483.8135333                                 | 391.5384319 | 584.2935017          |                    |
| 599.5256205                                                 | 675.1466716                                 | 691.456961  | 486.548489           |                    |
| 655.3764177                                                 | -0.430212881                                | 0.049426906 | 1                    | CYREN 7            |
| 135092363                                                   | 135170795                                   | -           | 5321                 | protein_coding     |
| cell cycle regulator of NHEJ [Source:HGNC                   |                                             |             |                      |                    |
| Symbol;Acc:HGNC:22432]                                      | -                                           | 503 450     | 628 544              | 557                |

|                                                              |              |                      |             |                |      |      |
|--------------------------------------------------------------|--------------|----------------------|-------------|----------------|------|------|
| 749                                                          | 4.570628703  | 3.685342475          | 5.509502959 |                |      |      |
| 5.680907062                                                  | 6.434418383  | 6.545149591          |             |                |      |      |
| ENSG00000031691                                              | 358.7722622  | 386.3179195          | 331.2237048 |                |      |      |
| 473.8897368                                                  | 610.9047082  | 410.8122132          | 358.7712955 |                |      |      |
| 498.5355527                                                  | -0.473176647 | 0.049427801          | 1           | CENPQ          | 6    |      |
| 49463378                                                     | 49493107     | +                    | 1733        | protein_coding |      |      |
| centromere protein Q [Source:HGNC Symbol;Acc:HGNC:21347]     |              |                      |             |                |      |      |
| -                                                            | 373          | 444                  | 356         | 430            | 504  | 445  |
| 10.40666287                                                  | 11.16459581  | 9.589533289          | 13.78738606 |                |      |      |
| 17.87636996                                                  | 11.93967393  |                      |             |                |      |      |
| ENSG00000179941                                              | 621.3589314  | 797.8683157          | 746.1837395 |                |      |      |
| 555.4428543                                                  | 566.0565451  | 540.0565049          | 721.8036622 |                |      |      |
| 553.8519681                                                  | 0.382586967  | 0.049501482          | 1           | BBS10          | 12   |      |
| 76344474                                                     | 76348442     | -                    | 3595        | protein_coding |      |      |
| Bardet-Biedl syndrome 10 [Source:HGNC Symbol;Acc:HGNC:26291] |              |                      |             |                |      |      |
| -                                                            | 646          | 917                  | 802         | 504            | 467  | 585  |
| 8.688300629                                                  | 11.11550091  | 10.41409438          | 7.790111708 |                |      |      |
| 7.984823965                                                  | 7.566377226  |                      |             |                |      |      |
| ENSG00000118495                                              | 760.8280414  | 939.6922366          | 950.8725458 |                |      |      |
| 681.078738                                                   | 707.8737095  | 684.0715729          | 883.7976079 |                |      |      |
| 691.0080068                                                  | 0.35533486   | 0.049514042          | 1           | PLAGL1         | 6    |      |
| 143940300                                                    | 144064599    | -                    | 8733        | protein_coding |      |      |
| PLAG1 like zinc finger 1 [Source:HGNC Symbol;Acc:HGNC:9046]  |              |                      |             |                |      |      |
| zf-C2H2                                                      | 791          | 1080                 | 1022        | 618            | 584  | 741  |
| 4.379396227                                                  | 5.389132892  | 5.463028567          | 3.932213217 |                |      |      |
| 4.110519825                                                  | 3.945352085  |                      |             |                |      |      |
| ENSG00000126267                                              | 1728.455108  | 1769.753712          | 2243.203237 |                |      |      |
| 1887.844463                                                  | 2390.285882  | 3075.090971          | 1913.804019 |                |      |      |
| 2451.073772                                                  | -0.357384657 | 0.04952558           | 1           | COX6B1         | 19   |      |
| 35648223                                                     | 35658861     | +                    | 936         | protein_coding |      |      |
| cytochrome c oxidase subunit 6B1 [Source:HGNC                |              |                      |             |                |      |      |
| Symbol;Acc:HGNC:2280]                                        | -            | 1797                 | 2034        | 2411           | 1713 | 1972 |
| 3331                                                         | 92.826814    | 94.69644983          | 120.2451027 |                |      |      |
| 101.693585                                                   | 129.5025804  | 165.474014           |             |                |      |      |
| ENSG00000263142                                              | 209.6845929  | 113.981188           | 129.3261095 |                |      |      |
| 76.04277172                                                  | 103.0295639  | 73.85388102          | 150.9972968 |                |      |      |
| 84.30873888                                                  | 0.842058953  | 0.049594343          | 1           | LRRC37A17P     |      |      |
| 17                                                           | 46978481     | 47054569             | +           | 5074           |      |      |
| transcribed_unprocessed_pseudogene "leucine rich repeat      |              |                      |             |                |      |      |
| containing 37 member A17, pseudogene [Source:HGNC            |              |                      |             |                |      |      |
| Symbol;Acc:HGNC:48365]"                                      | -            | 218                  | 131         | 139            | 69   | 85   |
| 80                                                           | 2.07733839   | 1.125069705          | 1.278822807 |                |      |      |
| 0.755632574                                                  | 1.029712116  | 0.733112361          |             |                |      |      |
| ENSG00000238086                                              | 10.58041524  | 0                    | 14.88645864 | 0              | 0    |      |
| 0                                                            | 8.488957961  | 0                    | 5.426580497 | 0.049640161    |      |      |
| 1                                                            | PPP1R26P1    | 13                   | 48316863    | 48320475       |      |      |
| -                                                            | 3613         | processed_pseudogene | protein     | phosphatase 1  |      |      |
| regulatory subunit 26 pseudogene 1 [Source:HGNC              |              |                      |             |                |      |      |
| Symbol;Acc:HGNC:42015]                                       | -            | 11                   | 0           | 16             | 0    | 0    |
| 0                                                            | 0.147206145  | 0                    | 0.206727407 | 0              | 0    |      |



0

|                                                               |              |                          |              |                |               |             |   |
|---------------------------------------------------------------|--------------|--------------------------|--------------|----------------|---------------|-------------|---|
| ENSG00000269190                                               | 1790.975743  | 1766.273371              | 1978.038192  |                |               |             |   |
| 1469.058184                                                   | 1504.231633  | 1613.7073                | 1845.095769  |                |               |             |   |
| 1528.999039                                                   | 0.270809219  | 0.049683939              | 1            | FBX017         | 19            |             |   |
| 38941401                                                      | 38975910     | -                        | 4960         | protein_coding |               |             |   |
| F-box protein 17 [Source:HGNC Symbol;Acc:HGNC:18754] -        |              |                          |              |                |               |             |   |
| 1862                                                          | 2030         | 2126                     | 1333         | 1241           | 1748          | 18.15094399 |   |
| 17.83499365                                                   | 20.00910299  | 14.93346253              | 15.37933175  |                |               |             |   |
| 16.38667234                                                   |              |                          |              |                |               |             |   |
| ENSG00000167680                                               | 768.5228888  | 791.7777179              | 748.9749505  |                |               |             |   |
| 943.371197                                                    | 1066.659014  | 899.1710014              | 769.7585191  |                |               |             |   |
| 969.7337376                                                   | -0.332552463 | 0.049751105              | 1            | SEMA6B         | 19            |             |   |
| 4542593                                                       | 4559808      | -                        | 4412         | protein_coding | semaphorin 6B |             |   |
| [Source:HGNC Symbol;Acc:HGNC:10739] -                         |              |                          |              |                |               |             |   |
| 856                                                           | 880          | 974                      | 8.756135872  | 8.988029441    |               |             |   |
| 8.517387626                                                   | 10.780783    | 12.26011457              | 10.26489405  |                |               |             |   |
| ENSG00000099204                                               | 19.23711862  | 18.27179349              | 12.09524765  |                |               |             |   |
| 41.87862791                                                   | 31.51492542  | 65.5453194               | 16.53471992  |                |               |             |   |
| 46.31295758                                                   | -1.488680128 | 0.04977008               | 1            | ABLIM1         | 10            |             |   |
| 114431113                                                     | 114685003    | -                        | 10039        | protein_coding |               |             |   |
| actin binding LIM protein 1 [Source:HGNC Symbol;Acc:HGNC:78]  |              |                          |              |                |               |             |   |
| -                                                             | 20           | 21                       | 13           | 38             | 26            | 71          |   |
| 0.096325386                                                   | 0.091156457  | 0.060450366              | 0.21033192   |                |               |             |   |
| 0.159195304                                                   | 0.328850807  |                          |              |                |               |             |   |
| ENSG00000271367                                               | 0            | 0                        | 8.816553243  | 0              |               |             |   |
| 14.7707762                                                    | 0            | 7.862443149              | -5.541313466 | 0.049820494    |               |             |   |
| 1                                                             | AL034374.1   | 6                        | 53350158     | 53350705       |               |             |   |
| +                                                             | 548          | lincRNA novel transcript | -            | 0              |               |             |   |
| 0                                                             | 0            | 8                        | 0            | 16             | 0             | 0           | 0 |
| 0.811187915                                                   | 0            | 1.357595664              |              |                |               |             |   |
| ENSG00000119599                                               | 766.599177   | 701.2888358              | 638.2569143  |                |               |             |   |
| 932.3505055                                                   | 844.8424239  | 898.2478279              | 702.048309   |                |               |             |   |
| 891.8135857                                                   | -0.345432505 | 0.0498617                | 1            | DCAF4          | 14            |             |   |
| 72926332                                                      | 72959703     | +                        | 5581         | protein_coding |               |             |   |
| DDB1 and CUL4 associated factor 4 [Source:HGNC                |              |                          |              |                |               |             |   |
| Symbol;Acc:HGNC:20229] -                                      |              |                          |              |                |               |             |   |
| 973                                                           | 6.904742951  | 6.293346111              | 5.737968094  | 686            | 846           | 697         |   |
| 8.423069501                                                   | 7.676585932  | 8.106471046              |              |                |               |             |   |
| ENSG00000148834                                               | 3232.797784  | 4251.237285              | 3821.167853  |                |               |             |   |
| 3729.402022                                                   | 5061.781868  | 5112.534913              | 3768.400974  |                |               |             |   |
| 4634.572935                                                   | -0.298442803 | 0.049904939              | 0.269486672  |                |               | GST01       |   |
| 10                                                            | 104235356    | 104267459                | +            | 1691           |               |             |   |
| protein_coding glutathione S-transferase omega 1 [Source:HGNC |              |                          |              |                |               |             |   |
| Symbol;Acc:HGNC:13312] -                                      |              |                          |              |                |               |             |   |
| 5538                                                          | 96.10060491  | 125.9123857              | 113.3775665  | 4107           | 3384          | 4176        |   |
| 111.1984645                                                   | 151.7973684  | 152.2791212              |              |                |               |             |   |
