# Supplementary material for: Multiomic screening of invasive GBM cells reveals targetable transsulfuration pathway alterations
Source: PubMed Central journal article supplement (PMC10849762; doi:10.1172/jci170397), 2024-02-01
Supplement: jci-134-170397-s081.pdf [file jci-134-170397-s081.pdf]

| <b>Additional Cell Culture Reagents</b>                      | <b>Concentration</b> |
|--------------------------------------------------------------|----------------------|
| N-Acetyl-L-cysteine (Sigma-Aldrich, A9165)                   | 1 – 8 mM             |
| L-Glutathione (Sigma-Aldrich, G6013)                         | 100 $\mu$ M          |
| MnTBAP (Sigma-Aldrich, 475870)                               | 30 $\mu$ M           |
| L-Cysteine (Sigma-Aldrich, C7477-25G)                        | 50 $\mu$ M           |
| Erastin (MedChemExpress, HY-15763)                           | 1 nM – 5 $\mu$ M     |
| Hydrogen peroxide solution (Sigma-Aldrich, H1009)            | 0.1 – 100 $\mu$ M    |
| Sodium Hydrogen Sulfide, NaHS (Cayman Chemical, 207683-19-0) | 0.01 – 1000 $\mu$ M  |
| L-Methionine (Sigma, M5308)                                  | 0.201 mM             |
| L-Glutamine (Gibco, 25030081)                                | 4 mM                 |
| LIVE/DEAD – Ethidium homodimer (ThermoFisher, R37601)        | 4 $\mu$ M            |
| LIVE/DEAD – Calcein AM (ThermoFisher, R37601)                | 1 $\mu$ M            |

**Supplemental Table 19. Concentrations used for additional cell culture reagents.** Shown are the concentrations used and vendors for reagents used for cell culture experiments.
